# Supplementary material for: Smarca4 deficiency induces Pttg1 oncogene upregulation and hyperproliferation of tubular and interstitial cells during kidney development
Source: Front Cell Dev Biol. 2023 Sep 4;11:1233317. doi: 10.3389/fcell.2023.1233317 (PMC10506413; doi:10.3389/fcell.2023.1233317)
Supplement: Supplementary file 1 [file Table2.XLSX]

## Sheet: Cluster0_MutVsCTRL.DEGs
Gene	p_val	avg_logFC	pct.1	pct.2	p_val_adj
Gm10260	2.97e-105	1.31803	0.532	0.004	3.35e-102
Hist1h2ap	NA	0.645977	0.486	0.251	NA
Basp1	6.39e-53	0.609507	0.993	0.973	2.4e-50
Col1a1	2.71e-24	0.593285	0.995	0.982	2.44e-22
Uba52	5.15e-77	0.5497	0.977	0.912	3.87e-74
Tpm3-rs7	3.99e-43	0.513357	0.507	0.066	9.97e-41
Dcn	2.07e-09	0.490146	0.876	0.759	2.83e-08
Col1a2	7.46e-25	0.486022	0.999	0.998	7.64e-23
Mest	7.81e-27	0.482732	0.974	0.922	1.1e-24
Hsp90b1	1.78e-23	0.4809	0.996	0.984	1.54e-21
Nnat	3.72e-23	0.472428	0.564	0.272	3.11e-21
Stmn1	2.32e-16	0.463039	0.955	0.866	9.02e-15
Apoe	2.03e-21	0.460648	0.636	0.424	1.39e-19
Pdia6	1.86e-43	0.454233	0.988	0.982	5.23e-41
Tubb4b	4.15e-15	0.4465	0.789	0.663	1.38e-13
Cdkn1c	6.4e-09	0.443128	0.988	0.969	8.09e-08
Eif3j1	2.67e-32	0.441577	0.723	0.395	5.02e-30
Col3a1	6.31e-18	0.425438	0.999	1	2.96e-16
Il11ra1	7.86e-22	0.414214	0.745	0.49	5.53e-20
Sostdc1	2.12e-05	0.411846	0.174	0.101	0.00010902
Fn1	1.19e-17	0.409525	0.981	0.928	5.48e-16
Tmsb10	1.37e-53	0.409142	1	1	6.16e-51
Crip1	2.11e-11	0.403935	0.678	0.527	4.41e-10
Gm10076	1.25e-29	0.403227	0.9	0.751	1.88e-27
Cryab	5.35e-12	0.402544	0.402	0.198	1.24e-10
Arf5	1.39e-40	0.398686	0.992	0.982	3.14e-38
Col14a1	6.8e-14	0.393781	0.872	0.757	1.99e-12
Rps2	8.26e-75	0.388653	0.999	1	4.65e-72
Tuba1a	3.12e-17	0.377759	0.984	0.967	1.29e-15
Lum	4.5e-05	0.365875	0.384	0.267	0.000215992
Myl9	4.01e-10	0.365038	0.973	0.963	6.5e-09
Calm1	1.32e-25	0.360824	1	0.988	1.65e-23
Fdps	3.2e-11	0.360689	0.387	0.235	6.5e-10
mt-Cytb	1.12e-34	0.358682	1	0.998	2.28e-32
Alcam	1.01e-08	0.345671	0.926	0.846	1.24e-07
Acta2	0.00017949	0.343543	0.964	0.916	0.00070054
Hspa8	1.21e-24	0.343524	0.996	0.998	1.14e-22
Sparc	6.32e-12	0.341878	0.999	0.99	1.45e-10
Cox5b	7.34e-22	0.340633	0.97	0.924	5.33e-20
Serpinh1	4.59e-26	0.339963	1	0.996	6.08e-24
Maged1	1.45e-19	0.337256	0.982	0.946	7.77e-18
Bzw2	8.59e-16	0.336356	0.804	0.718	3.23e-14
Anxa2	6.27e-17	0.334702	0.99	0.984	2.48e-15
Erh	6.3e-18	0.333374	0.908	0.784	2.96e-16
Pebp1	8.46e-30	0.33288	0.994	0.994	1.36e-27
Cfl1	4.02e-25	0.331562	0.995	0.996	4.31e-23
Lgals1	1.45e-17	0.330471	0.999	0.996	6.55e-16
Pdgfra	1.98e-11	0.330284	0.828	0.716	4.21e-10
Rbp1	4.61e-17	0.329149	0.988	0.959	1.85e-15
Col26a1	2.02e-17	0.326406	0.518	0.28	8.93e-16
Ndufa4	6.17e-21	0.326048	0.986	0.967	4.09e-19
Pkdcc	4.93e-11	0.32527	0.949	0.916	9.68e-10
H2afx	1.28e-10	0.324366	0.523	0.387	2.35e-09
Atp5k	5.96e-23	0.323843	0.993	0.961	4.79e-21
Tubb5	4.74e-20	0.320918	0.999	0.998	2.89e-18
H2afv	4.57e-13	0.320074	0.988	0.965	1.24e-11
Ddost	2.16e-17	0.317569	0.938	0.889	9.37e-16
Peg3	4.1e-07	0.317482	0.909	0.837	3.4e-06
Crip2	3.86e-10	0.315858	0.578	0.397	6.3e-09
Selenow	1.41e-22	0.314459	0.986	0.981	1.1e-20
Rpn2	1.2e-14	0.314388	0.828	0.66	3.8e-13
Hmgn2	2.07e-11	0.312939	0.949	0.911	4.36e-10
Postn	0.00196509	0.312495	0.34	0.284	0.00526832
Fth1	9.45e-25	0.309944	0.999	1	9.25e-23
Sec61g	6.57e-20	0.309855	0.996	0.988	3.79e-18
Ssr2	2.7e-14	0.305941	0.949	0.926	8.23e-13
Anxa6	1.4e-14	0.305785	0.931	0.858	4.39e-13
Rtn4	1.1e-14	0.304748	0.955	0.891	3.55e-13
Anxa5	2.06e-15	0.303706	0.977	0.938	7.03e-14
Tshz2	4.76e-08	0.303524	0.939	0.881	5.06e-07
Maged2	1.24e-15	0.302227	0.995	0.992	4.36e-14
Wdfy1	1e-15	0.301877	0.44	0.179	3.7e-14
Col5a2	3.3e-12	0.301612	0.865	0.726	7.99e-11
P4hb	1.51e-12	0.301212	0.906	0.817	3.87e-11
mt-Nd4	1.94e-20	0.300537	0.998	0.998	1.25e-18
Srsf2	1.99e-12	0.300118	0.911	0.839	4.88e-11
Ostc	3.56e-14	0.29945	0.958	0.897	1.07e-12
Akr1a1	1.08e-15	0.298991	0.971	0.951	3.87e-14
Actg1	7.69e-20	0.296789	1	1	4.33e-18
Mpp6	3.75e-10	0.296628	0.667	0.543	6.17e-09
Sec61b	6.3e-14	0.296452	0.983	0.967	1.87e-12
Col4a1	4.68e-07	0.295186	0.98	0.938	3.8e-06
Igfbp3	0.000403828	0.293796	0.589	0.494	0.00140126
Atp5e	3.04e-20	0.291502	0.989	0.994	1.9e-18
S100a6	1.61e-07	0.291263	0.946	0.911	1.53e-06
Bok	1.25e-07	0.289925	0.76	0.646	1.25e-06
Bgn	5.71e-09	0.288765	0.988	0.965	7.34e-08
Dnaja1	5.17e-13	0.288142	0.974	0.946	1.39e-11
Tpm1	1.51e-05	0.286848	0.986	0.944	8.31e-05
Rcn3	5.68e-13	0.286751	0.984	0.953	1.5e-11
Tpm2	1.94e-07	0.28559	0.984	0.963	1.79e-06
Srsf3	4.7e-12	0.285518	0.98	0.942	1.1e-10
Mtch1	3.53e-12	0.285218	0.957	0.903	8.46e-11
Meg3	1.6e-06	0.285092	0.942	0.883	1.14e-05
Dbi	7.64e-12	0.284654	0.901	0.866	1.72e-10
Hmgcs1	1.6e-08	0.284084	0.427	0.29	1.87e-07
Hnrnpa3	3.27e-10	0.282982	0.983	0.94	5.54e-09
Raly	2.75e-13	0.282975	0.93	0.846	7.64e-12
Pdlim2	8.02e-10	0.281447	0.952	0.907	1.2e-08
Kdelr3	2.44e-11	0.281408	0.705	0.523	5e-10
Cnn2	1.96e-08	0.280803	0.979	0.963	2.22e-07
Rrbp1	2.93e-10	0.280741	0.981	0.949	5.05e-09
Psmb3	7.7e-12	0.280693	0.894	0.805	1.72e-10
Selenom	1.79e-10	0.278189	0.973	0.955	3.21e-09
Ppp1r14b	2.36e-10	0.277778	0.932	0.875	4.19e-09
Calr	2.67e-10	0.277286	0.99	0.979	4.69e-09
Tubb2a	3.16e-09	0.276621	0.588	0.434	4.23e-08
Ppia	1.63e-18	0.275754	1	0.998	8.18e-17
Pmp22	1.32e-08	0.275747	0.802	0.685	1.58e-07
H2afz	0.000361564	0.275218	0.984	0.992	0.00127887
Itga9	7.41e-10	0.2751	0.786	0.636	1.12e-08
Cdh11	2.72e-10	0.274832	0.981	0.967	4.76e-09
Trim35	1.08e-10	0.274593	0.78	0.656	2.02e-09
Oaf	1.73e-10	0.274434	0.766	0.625	3.13e-09
Mfap2	2.05e-09	0.273844	0.984	0.928	2.81e-08
Fbln5	1.13e-06	0.273289	0.912	0.842	8.28e-06
Fam32a	4.48e-12	0.273211	0.755	0.593	1.06e-10
Fkbp1a	3.53e-11	0.272624	0.976	0.944	7.04e-10
Actb	1.05e-15	0.272616	1	1	3.82e-14
Pfn1	3.13e-13	0.271784	0.996	0.99	8.6e-12
Kdelr2	5.01e-10	0.271714	0.809	0.702	8e-09
Tmed9	1.13e-11	0.271081	0.964	0.922	2.44e-10
Rbm3	1.66e-12	0.270732	0.987	0.981	4.14e-11
Dynll1	8.84e-10	0.270681	0.994	0.988	1.29e-08
mt-Nd1	6.73e-15	0.270242	0.998	0.996	2.2e-13
Sfpq	1.92e-08	0.269501	0.896	0.831	2.18e-07
Snrpg	4.94e-11	0.269344	0.913	0.827	9.68e-10
Arpc2	1.1e-10	0.269057	0.957	0.916	2.04e-09
Psmb6	1.23e-11	0.268414	0.974	0.924	2.63e-10
Copz2	1.79e-10	0.267815	0.826	0.704	3.21e-09
Nr2f1	5.39e-10	0.267396	0.504	0.315	8.37e-09
Slc9a3r2	1.05e-10	0.267266	0.749	0.584	1.99e-09
Fbn1	2.73e-08	0.267139	0.795	0.708	2.99e-07
Vcp	3.31e-11	0.266956	0.971	0.959	6.66e-10
Ywhaq	1.06e-11	0.266659	0.97	0.946	2.31e-10
Enho	2.77e-10	0.266393	0.545	0.366	4.8e-09
Ptms	5.34e-10	0.2656	0.995	0.986	8.35e-09
Oat	1.44e-09	0.265474	0.851	0.737	2.05e-08
Lmnb1	3.17e-07	0.265081	0.698	0.593	2.75e-06
Pclaf	9.17e-06	0.264384	0.335	0.218	5.38e-05
Mdk	1.12e-08	0.264231	0.992	0.99	1.35e-07
Tubb6	4.02e-09	0.264171	0.532	0.36	5.33e-08
Ciapin1	1.17e-12	0.263604	0.541	0.321	3.03e-11
Hsd11b2	6.36e-06	0.263561	0.283	0.097	3.86e-05
Rasgrp2	2.62e-07	0.26221	0.845	0.805	2.31e-06
Cavin3	7e-06	0.261622	0.573	0.451	4.23e-05
Anapc5	8.68e-10	0.261545	0.913	0.84	1.28e-08
Rhoc	1.48e-08	0.261167	0.882	0.792	1.74e-07
Sfrp1	0.000141412	0.260675	0.931	0.887	0.000572769
Cox7c	7.26e-13	0.260306	0.99	0.977	1.9e-11
Mfge8	1.56e-07	0.260298	0.827	0.757	1.5e-06
Txndc5	5.89e-10	0.259879	0.827	0.722	9.08e-09
Oaz1	1.88e-15	0.259322	0.996	0.998	6.51e-14
Marcksl1	1.14e-10	0.25842	0.962	0.947	2.1e-09
Ap1s1	3.4e-10	0.258212	0.741	0.574	5.71e-09
Eif1	2.5e-17	0.257892	0.999	1	1.06e-15
Atxn7l3b	8.88e-12	0.256979	0.986	0.961	1.96e-10
Rex1bd	8.59e-10	0.256843	0.807	0.665	1.27e-08
Gipc1	1.06e-09	0.256826	0.758	0.646	1.52e-08
Nme1	3.28e-07	0.256479	0.883	0.8	2.82e-06
Pdia3	2.38e-08	0.256055	0.952	0.949	2.64e-07
Vim	3.47e-10	0.255996	1	1	5.75e-09
Rap2a	2.01e-06	0.255646	0.714	0.586	1.39e-05
Ybx1	6.46e-10	0.255565	1	0.992	9.9e-09
Cenpa	0.000227781	0.255168	0.273	0.181	0.000859235
Dad1	5.87e-09	0.253772	0.979	0.947	7.52e-08
Arl3	4.57e-10	0.253734	0.803	0.677	7.35e-09
Selenos	1.85e-08	0.252554	0.817	0.708	2.14e-07
Ubb	3.14e-17	0.252421	0.998	0.998	1.29e-15
Psmd8	9.76e-10	0.251231	0.911	0.831	1.42e-08
Romo1	5.29e-10	0.251081	0.945	0.899	8.32e-09
Grb10	1.87e-08	0.25049	0.926	0.854	2.14e-07
Oxct1	1.38e-08	0.25026	0.87	0.776	1.64e-07
Serf2	1.55e-12	0.25006	0.999	0.998	3.92e-11
Ptch1	1.92e-06	0.249496	0.572	0.432	1.34e-05
Tmem234	1.98e-09	0.249444	0.841	0.753	2.74e-08
Sfr1	7.6e-09	0.249219	0.973	0.949	9.46e-08
Gpx4	3.04e-10	0.248965	0.992	0.961	5.18e-09
Eif5a	2.7e-08	0.248867	0.986	0.969	2.96e-07
Capns1	4.53e-09	0.248583	0.956	0.912	5.97e-08
Ran	9.79e-07	0.248548	0.971	0.951	7.3e-06
Manf	8.82e-07	0.248126	0.839	0.718	6.66e-06
Pja1	7.94e-08	0.24782	0.807	0.695	8.13e-07
Prdx1	2.64e-09	0.247626	0.976	0.963	3.57e-08
Ppp1ca	7.01e-10	0.247438	0.979	0.946	1.07e-08
Lrrc59	1.6e-09	0.247327	0.619	0.444	2.23e-08
Hspa5	2.49e-06	0.24706	0.987	0.975	1.68e-05
Magt1	5.12e-09	0.246912	0.679	0.514	6.63e-08
Ccnd2	0.0139244	0.24684	0.878	0.86	0.02513
Pfn2	0.00205073	0.24672	0.495	0.409	0.00540199
Hoxd11	3.57e-07	0.246348	0.909	0.839	3.02e-06
Gpx7	2.32e-07	0.246144	0.71	0.584	2.08e-06
Erp29	1.37e-08	0.245499	0.939	0.897	1.63e-07
S100a10	2.98e-08	0.24526	0.995	0.988	3.23e-07
Flna	1.97e-06	0.244923	0.959	0.914	1.37e-05
Selenoh	4.63e-06	0.244846	0.826	0.726	2.97e-05
Tma7	1.88e-08	0.244401	0.939	0.885	2.14e-07
Tubb2b	2.09e-06	0.244358	0.399	0.257	1.44e-05
Ubl5	9.39e-09	0.24423	0.896	0.833	1.16e-07
Ptp4a2	5.02e-08	0.243946	0.805	0.685	5.28e-07
Rnf187	1.51e-08	0.243776	0.815	0.732	1.77e-07
Fstl1	1.41e-07	0.243148	0.98	0.959	1.38e-06
Mrfap1	1.11e-09	0.243024	0.981	0.967	1.58e-08
Mxd4	1.03e-07	0.242276	0.906	0.807	1.04e-06
Srrt	1.57e-09	0.242093	0.556	0.372	2.22e-08
H2afy	2.96e-08	0.242093	0.919	0.874	3.22e-07
Tmsb4x	2.66e-07	0.242035	1	1	2.33e-06
Tmem167	1.14e-07	0.241649	0.871	0.77	1.15e-06
Efnb1	7.52e-09	0.241223	0.622	0.465	9.41e-08
Timp2	2.89e-07	0.240808	0.844	0.784	2.52e-06
Hmgb2	0.00365407	0.240381	0.866	0.856	0.00861673
Ccnb2	0.000585832	0.240005	0.266	0.177	0.00192879
App	7.15e-06	0.239929	0.905	0.837	4.31e-05
Arpc1b	3.95e-06	0.239897	0.927	0.87	2.57e-05
Tmbim6	7.92e-08	0.239575	0.921	0.825	8.13e-07
Nucks1	4.49e-06	0.239464	0.891	0.831	2.88e-05
mt-Co3	2.06e-13	0.239428	0.999	1	5.87e-12
Prdx4	6.79e-07	0.239252	0.916	0.858	5.29e-06
Rbm25	7.99e-08	0.239126	0.939	0.905	8.14e-07
Nedd8	9.89e-10	0.239069	0.989	0.965	1.43e-08
Canx	2.25e-07	0.239013	0.852	0.728	2.03e-06
Ddx5	1.09e-08	0.239012	0.993	0.982	1.31e-07
G3bp2	2.12e-08	0.238876	0.636	0.486	2.38e-07
Ndufa5	2.26e-08	0.238105	0.912	0.84	2.52e-07
Esd	4.71e-09	0.237793	0.963	0.928	6.13e-08
Sh3bgrl3	1.3e-07	0.237336	0.914	0.833	1.29e-06
1810058I24Rik	5.08e-08	0.236855	0.951	0.918	5.3e-07
Kcnq1ot1	0.00361434	0.236342	0.893	0.831	0.00854904
Morf4l2	2.05e-07	0.23553	0.895	0.825	1.87e-06
1500009L16Rik	1.41e-07	0.234625	0.606	0.502	1.38e-06
Arcn1	2.08e-08	0.234516	0.642	0.481	2.35e-07
Cmtm3	3.94e-08	0.233424	0.737	0.603	4.23e-07
Igfbp7	0.00116954	0.233373	0.982	0.934	0.00343026
Atp5j2	1.05e-08	0.23303	0.983	0.975	1.28e-07
Scd2	3.95e-07	0.232962	0.656	0.545	3.29e-06
Rps21	1.44e-25	0.232508	1	1	1.71e-23
Col4a2	2.8e-05	0.232331	0.93	0.875	0.000139182
Mcrip1	3.44e-07	0.232179	0.884	0.811	2.93e-06
Mmp14	5.69e-06	0.232178	0.82	0.732	3.51e-05
H19	0.000350046	0.232156	0.914	0.877	0.00124732
Cyb5r3	4.26e-08	0.232146	0.677	0.527	4.55e-07
Ckap4	1.11e-05	0.231346	0.906	0.86	6.34e-05
Reep5	1.6e-07	0.231317	0.895	0.839	1.53e-06
Ptma	1.37e-07	0.231146	1	1	1.35e-06
Hmgb3	4.95e-06	0.230696	0.754	0.677	3.1e-05
Nav3	0.00027416	0.230209	0.288	0.161	0.00100254
Srp9	6.46e-08	0.230179	0.912	0.872	6.71e-07
Txnl1	1.05e-07	0.230057	0.885	0.805	1.06e-06
Prelid1	1.61e-07	0.230005	0.932	0.86	1.53e-06
Hnrnpm	6.45e-07	0.229849	0.95	0.907	5.04e-06
Son	4.91e-08	0.228993	0.98	0.967	5.19e-07
Isyna1	1.4e-05	0.22888	0.541	0.451	7.76e-05
Metap2	1.5e-07	0.228814	0.928	0.858	1.45e-06
Rpl35	1.32e-19	0.228548	1	1	7.24e-18
Epha3	1.18e-06	0.22845	0.483	0.364	8.62e-06
Tmem176b	2.06e-05	0.228442	0.846	0.724	0.000107052
Khdrbs3	8.96e-07	0.228258	0.482	0.342	6.75e-06
Mfap4	0.0194019	0.228132	0.835	0.794	0.032583
Gstp1	7.4e-09	0.228029	0.562	0.418	9.31e-08
mt-Atp6	6.5e-11	0.227991	1	1	1.24e-09
Chd3	8.87e-06	0.227975	0.94	0.907	5.21e-05
Gpx8	3.45e-07	0.227469	0.89	0.809	2.93e-06
Myl6	6.44e-07	0.226742	1	1	5.04e-06
Fkbp10	1.79e-07	0.226727	0.777	0.654	1.69e-06
Hoxc10	8.63e-07	0.226239	0.705	0.607	6.55e-06
S100a11	4.33e-07	0.225805	0.996	0.984	3.55e-06
Ccar1	5.09e-06	0.225431	0.78	0.689	3.17e-05
Vdac3	1.26e-07	0.225195	0.93	0.868	1.25e-06
Fbxl7	3.98e-05	0.225098	0.764	0.681	0.000192536
Srsf6	3.64e-07	0.224836	0.804	0.669	3.07e-06
Psmb4	1.83e-07	0.224545	0.95	0.895	1.71e-06
Taldo1	2.26e-07	0.224493	0.884	0.792	2.04e-06
Tra2b	3.96e-06	0.22442	0.828	0.763	2.57e-05
Snrpb	1.87e-07	0.224306	0.957	0.916	1.74e-06
Hmgn1	1.88e-07	0.224296	0.994	0.988	1.74e-06
Igf1	0.0137898	0.224155	0.174	0.074	0.0249836
Psmc2	1.85e-07	0.224106	0.802	0.698	1.73e-06
Smim7	3.34e-07	0.223966	0.729	0.609	2.86e-06
Ptbp1	5.34e-07	0.223788	0.722	0.589	4.26e-06
Ift20	2.18e-06	0.223401	0.84	0.741	1.5e-05
Bcap31	2.02e-07	0.22326	0.803	0.702	1.84e-06
Elob	2.63e-08	0.222798	0.989	0.982	2.91e-07
Tceal8	4.2e-07	0.222576	0.837	0.728	3.47e-06
Sar1a	5.97e-07	0.222558	0.772	0.671	4.74e-06
Tceal9	7.58e-07	0.2222	0.984	0.981	5.87e-06
Psme1	5.1e-07	0.222097	0.788	0.695	4.09e-06
Ranbp1	1.66e-05	0.221914	0.877	0.817	8.96e-05
Cks1b	2.23e-06	0.22184	0.641	0.547	1.52e-05
Jpt1	4.69e-06	0.221752	0.742	0.632	2.99e-05
Rps27	5.6e-20	0.221674	1	1	3.32e-18
Spcs2	8.06e-07	0.221622	0.953	0.911	6.17e-06
Zfp503	8.31e-05	0.221524	0.831	0.747	0.000373631
Eloc	2.08e-07	0.221477	0.8	0.687	1.89e-06
Hdlbp	1.35e-06	0.221457	0.897	0.829	9.8e-06
D8Ertd738e	4.41e-07	0.221271	0.922	0.852	3.61e-06
Nfib	2.22e-05	0.22123	0.729	0.654	0.000113549
Ywhae	6.59e-08	0.221179	0.995	0.996	6.8e-07
Pmvk	1.85e-08	0.221126	0.501	0.331	2.14e-07
Ywhab	5.05e-07	0.220759	0.939	0.883	4.06e-06
Dnajc3	1.23e-06	0.22052	0.717	0.57	8.97e-06
Cox4i1	2.19e-11	0.220437	0.999	0.994	4.53e-10
Cd81	1.33e-07	0.219722	0.996	0.99	1.31e-06
Serpinb6a	8.32e-06	0.219717	0.798	0.716	4.93e-05
Tmed2	2.39e-06	0.219701	0.915	0.883	1.62e-05
mt-Nd4l	8.99e-07	0.219689	0.982	0.963	6.75e-06
Ddx39b	7.45e-06	0.219383	0.916	0.897	4.44e-05
Eif1ax	7.72e-07	0.219149	0.783	0.667	5.95e-06
Psmb2	6.35e-07	0.218528	0.897	0.835	5.02e-06
Usp50	3.7e-07	0.218515	0.371	0.189	3.11e-06
Clic1	1.07e-06	0.218458	0.976	0.969	7.88e-06
Tbcb	1.03e-06	0.218102	0.801	0.698	7.6e-06
Rac1	1.88e-06	0.217844	0.881	0.837	1.32e-05
Ndufb8	1.36e-06	0.217739	0.958	0.924	9.86e-06
Hdac1	2.6e-07	0.217722	0.736	0.564	2.31e-06
Rpl7l1	5.53e-07	0.217349	0.716	0.584	4.4e-06
Copb2	2.21e-06	0.217162	0.875	0.767	1.51e-05
Psmd7	5.45e-06	0.217114	0.905	0.85	3.38e-05
Arf4	4.98e-06	0.216922	0.974	0.957	3.12e-05
Creb3l1	3.29e-07	0.216401	0.573	0.391	2.82e-06
Luzp1	1.01e-06	0.216198	0.76	0.611	7.51e-06
Crtap	2.61e-06	0.215925	0.668	0.547	1.75e-05
Blmh	1.4e-06	0.215735	0.808	0.726	1.01e-05
Ndn	1.75e-06	0.215471	0.773	0.658	1.23e-05
Atp5a1	5.08e-08	0.21545	0.998	0.994	5.3e-07
Arl4a	0.0112812	0.215402	0.584	0.543	0.021224
Swi5	3.65e-06	0.215339	0.964	0.951	2.41e-05
Prdx2	6.38e-07	0.215141	0.994	0.984	5.03e-06
Cpe	1.38e-05	0.215048	0.455	0.335	7.73e-05
6030408B16Rik	9.12e-05	0.214946	0.566	0.463	0.000403637
Tsc22d1	9.06e-05	0.214376	0.911	0.868	0.000403249
Sema6a	2.66e-07	0.213883	0.47	0.317	2.33e-06
Pdcd4	2.36e-05	0.213622	0.888	0.848	0.000118865
Lsm6	1.12e-06	0.213428	0.695	0.591	8.22e-06
Myl12a	7.2e-06	0.21326	0.984	0.973	4.32e-05
Col5a1	2.35e-05	0.213079	0.743	0.671	0.000118865
Phb	2.37e-07	0.213067	0.642	0.508	2.11e-06
Pcbp1	9.53e-06	0.212993	0.944	0.901	5.56e-05
Pomp	2.46e-06	0.212922	0.926	0.872	1.67e-05
Psmc4	3e-06	0.212731	0.797	0.698	2e-05
H2afy2	6.01e-06	0.212604	0.827	0.751	3.68e-05
Sec62	1.78e-05	0.212482	0.968	0.946	9.53e-05
Ncbp2	8.5e-07	0.212367	0.649	0.494	6.47e-06
Igfbp4	8.69e-05	0.212258	0.965	0.951	0.00038995
Arf1	3.53e-06	0.212249	0.976	0.959	2.33e-05
Csrp1	0.00217582	0.212123	0.896	0.856	0.00567124
Nt5dc2	7.42e-06	0.211969	0.796	0.696	4.44e-05
Actn1	0.000115235	0.211957	0.883	0.817	0.000482361
Top1	2.12e-05	0.211878	0.982	0.973	0.00010902
Ssr4	2.09e-05	0.211634	0.885	0.846	0.000108173
Sf3b5	3.34e-06	0.211625	0.857	0.774	2.22e-05
Limd2	2.92e-06	0.211266	0.686	0.556	1.95e-05
Rhoa	4.88e-06	0.211107	0.982	0.942	3.07e-05
Gpc3	0.000346352	0.210907	0.993	0.986	0.00123729
Hspb1	0.000158976	0.210779	0.359	0.241	0.0006292
Slc25a4	6.12e-09	0.210478	0.999	0.994	7.78e-08
Atox1	4.79e-06	0.210407	0.863	0.811	3.03e-05
Rasl11b	1.07e-05	0.210402	0.524	0.391	6.14e-05
Ccdc85b	9.75e-07	0.210374	0.467	0.321	7.3e-06
Akt1	3.87e-06	0.209874	0.81	0.665	2.53e-05
Marcks	8.4e-06	0.209709	0.995	0.994	4.95e-05
Atp5h	1.81e-07	0.209401	0.994	0.984	1.7e-06
Mdh1	1.39e-05	0.209395	0.939	0.877	7.76e-05
Dnm3os	5.21e-06	0.209221	0.628	0.496	3.24e-05
Hsp90aa1	0.000654549	0.209179	0.94	0.918	0.00210578
Ppic	2.13e-05	0.209113	0.957	0.92	0.000109682
Psma4	3.95e-06	0.208885	0.939	0.86	2.57e-05
Gnas	2.01e-07	0.20883	1	1	1.84e-06
Atp5j	3.98e-06	0.208804	0.981	0.971	2.58e-05
Mrpl27	1.45e-07	0.208795	0.55	0.422	1.41e-06
Smc6	2.22e-05	0.208732	0.779	0.722	0.000113549
Eif5	4.17e-05	0.208622	0.85	0.78	0.000201297
Ccdc88a	2.72e-05	0.208275	0.735	0.634	0.000135377
Zfp326	1.41e-06	0.208154	0.625	0.521	1.01e-05
Cks2	0.000149763	0.208033	0.354	0.241	0.000599051
Tgfb1i1	9.38e-05	0.207693	0.853	0.788	0.000411951
Nrp2	8.21e-05	0.207548	0.39	0.28	0.000371777
Slc6a6	1.98e-05	0.207328	0.533	0.377	0.000104216
Cyb5a	6.18e-06	0.207265	0.914	0.877	3.77e-05
Ssr1	4.74e-06	0.206916	0.671	0.566	3.01e-05
Cox6c	1.82e-06	0.20637	0.994	0.984	1.28e-05
Ppib	3.22e-07	0.206236	0.996	0.998	2.79e-06
Arl1	1.94e-05	0.206222	0.946	0.905	0.000103227
Gabarap	4.82e-06	0.206042	0.989	0.981	3.04e-05
Psmc5	7.8e-06	0.205862	0.815	0.732	4.64e-05
Rbm42	3.88e-07	0.205549	0.598	0.461	3.25e-06
Immt	4.48e-06	0.205235	0.759	0.663	2.88e-05
Sumo2	4.01e-07	0.205061	0.992	0.981	3.33e-06
Gnb1	2.08e-05	0.205019	0.877	0.831	0.000107743
Hint1	7.95e-07	0.205012	0.994	0.981	6.11e-06
Rpn1	2.24e-05	0.204765	0.764	0.679	0.000114262
Tmem256	1.18e-05	0.20464	0.911	0.852	6.68e-05
Snrpd1	3.45e-05	0.204615	0.918	0.872	0.000168536
Dnajb11	1.43e-06	0.204352	0.662	0.533	1.03e-05
Smarce1	1.1e-05	0.204352	0.829	0.805	6.32e-05
Emp3	2e-05	0.204352	0.987	0.959	0.000104625
Cdk4	0.000123569	0.204167	0.956	0.942	0.000511538
Nisch	2.36e-05	0.204029	0.897	0.833	0.000118865
Cd24a	0.00351821	0.203876	0.554	0.486	0.00840191
Ptov1	1.4e-05	0.203787	0.964	0.953	7.76e-05
Cxcl12	0.0373234	0.203647	0.612	0.521	0.054544
Ctdspl	7.16e-07	0.203111	0.556	0.414	5.56e-06
Uqcr11	9.51e-06	0.202869	0.945	0.918	5.56e-05
Fscn1	1.21e-05	0.202539	0.715	0.636	6.84e-05
Ube2n	1.65e-05	0.202471	0.823	0.774	8.96e-05
Cdv3	2.47e-05	0.202423	0.796	0.718	0.000124033
Nasp	0.000139583	0.202187	0.677	0.623	0.00056843
Tagln	0.183904	0.202184	0.761	0.661	0.198729
Birc5	0.00399502	0.201998	0.264	0.179	0.00920707
Cdc42	6.94e-06	0.201885	0.994	0.988	4.2e-05
Mbnl2	8.23e-05	0.201529	0.838	0.78	0.000371777
Ube2s	0.000578086	0.201424	0.889	0.846	0.00191167
Bsg	1.62e-05	0.201373	0.989	0.979	8.83e-05
Serp1	1.88e-06	0.200886	0.609	0.459	1.32e-05
Map1lc3a	5.8e-05	0.200492	0.94	0.874	0.000271585
Ppa1	1.89e-05	0.200344	0.544	0.455	0.000100513
Siva1	3.23e-05	0.200312	0.912	0.875	0.000158883
Ppp1r11	5.76e-06	0.200083	0.656	0.531	3.54e-05
Zeb2	0.00115355	0.199818	0.992	0.986	0.00340026
H3f3a	5e-11	0.199699	1	1	9.7e-10
Gadd45gip1	1.64e-06	0.199685	0.604	0.481	1.16e-05
2022-09-11	0.000142274	0.199638	0.975	0.963	0.000575227
Yipf5	5.63e-06	0.199589	0.666	0.529	3.48e-05
Pik3r1	9.95e-05	0.199294	0.696	0.605	0.000430968
Ap3s1	4.09e-06	0.199047	0.66	0.537	2.64e-05
Fkbp8	2e-05	0.199	0.864	0.774	0.000104625
Tmem258	4.35e-05	0.198798	0.931	0.901	0.000209098
Erg28	2.16e-06	0.198032	0.61	0.477	1.49e-05
Hnrnpa2b1	0.000571539	0.198006	0.981	0.969	0.00189453
Ndufa11	6.67e-05	0.197891	0.901	0.844	0.00030759
Vdac1	3.82e-05	0.19789	0.906	0.85	0.000186021
Sox4	0.00115112	0.197819	0.949	0.947	0.00339754
Cfl2	5.5e-05	0.197573	0.803	0.732	0.000259721
Fkbp9	1.08e-05	0.197459	0.708	0.599	6.2e-05
Ftl1	2.38e-09	0.197232	1	1	3.23e-08
Anapc13	3.78e-05	0.197085	0.801	0.741	0.00018424
Mcm3	0.000379125	0.197031	0.406	0.302	0.00133197
Srpr	7.23e-06	0.19667	0.709	0.558	4.33e-05
Eif4a3	1.41e-05	0.196466	0.736	0.642	7.8e-05
Calm2	0.000171752	0.196412	0.984	0.967	0.000673842
Ywhah	0.000134043	0.19639	0.821	0.735	0.000546857
Ube2m	4.52e-05	0.196358	0.871	0.798	0.000216629
Lamp1	6.3e-05	0.196322	0.934	0.899	0.00029314
Krtcap2	7.96e-05	0.196135	0.942	0.905	0.000362465
Tmem165	1.88e-05	0.19606	0.82	0.714	0.000100183
Usp46	3.51e-06	0.196016	0.519	0.379	2.33e-05
Txn1	0.000174533	0.195941	0.977	0.957	0.000683561
Glo1	2.57e-05	0.1958	0.813	0.708	0.000128916
Sec22b	5.78e-06	0.195199	0.601	0.469	3.55e-05
Polr2m	0.000112029	0.195076	0.914	0.889	0.000476017
Sptssa	3.14e-05	0.195036	0.822	0.726	0.000154897
Sqle	0.006825	0.195003	0.23	0.109	0.014192
Psip1	0.000701988	0.194972	0.834	0.763	0.00223288
Thy1	0.0137369	0.194906	0.221	0.109	0.0249079
Rnf7	3.86e-05	0.19475	0.891	0.804	0.000187526
Sap18	1.96e-05	0.194743	0.727	0.658	0.000103622
Ilk	0.000142908	0.19462	0.899	0.85	0.000576754
Mvk	2.51e-06	0.1945	0.446	0.313	1.69e-05
Ecscr	0.000126519	0.194331	0.365	0.247	0.000521833
Kdm5b	0.000113168	0.193615	0.794	0.732	0.000479049
Lims1	0.000114787	0.193288	0.742	0.644	0.000481548
Arap1	0.000109618	0.193189	0.721	0.619	0.000467538
Tmem14c	5e-05	0.193076	0.788	0.656	0.000238699
Nudc	6.45e-05	0.193053	0.862	0.813	0.000298938
1110008F13Rik	2.28e-05	0.192999	0.715	0.644	0.000116292
Psme2	1.71e-05	0.192769	0.721	0.615	9.21e-05
Hras	1.47e-05	0.192413	0.673	0.543	8.12e-05
Sf3b4	1.63e-06	0.191998	0.471	0.342	1.16e-05
Rbm4b	1.45e-06	0.191774	0.474	0.331	1.04e-05
Tax1bp3	2e-05	0.191697	0.71	0.58	0.000104625
Sra1	3.38e-05	0.191449	0.734	0.605	0.000165522
Cox7b	9.08e-05	0.191254	0.937	0.891	0.000403444
Zfp207	1.54e-05	0.191094	0.684	0.584	8.45e-05
Uqcrc1	0.000222038	0.19098	0.844	0.798	0.000838976
Selenok	0.0001437	0.190962	0.938	0.883	0.000578912
Sf3b6	6.39e-05	0.190685	0.851	0.745	0.000296703
Park7	9.6e-05	0.190636	0.962	0.936	0.000419501
Eif5b	0.000412893	0.19052	0.937	0.912	0.00142613
Ewsr1	0.000208672	0.190436	0.837	0.759	0.000799198
Cox6b1	8.74e-05	0.190307	0.98	0.947	0.000390522
mt-Nd3	0.000183404	0.190209	0.989	0.973	0.000713342
Rpl38	8.59e-10	0.190166	1	1	1.27e-08
1110065P20Rik	2.34e-05	0.189947	0.592	0.479	0.000118441
Il6st	9.73e-05	0.189933	0.611	0.514	0.000423761
Minos1	0.000122441	0.189815	0.883	0.827	0.000508741
Zfp36l1	0.00377212	0.189809	0.956	0.914	0.00879381
Rala	8.78e-05	0.189722	0.833	0.784	0.000391496
Rab34	0.000104079	0.189627	0.852	0.737	0.000447591
Chmp4b	5.76e-05	0.189561	0.814	0.698	0.0002701
Rbm28	9.25e-05	0.189307	0.666	0.549	0.000406873
Mesd	1.12e-05	0.189239	0.618	0.51	6.37e-05
Selenof	0.000114827	0.188784	0.986	0.953	0.000481548
Rab1a	9.69e-06	0.188692	0.649	0.498	5.64e-05
Alx1	0.0268032	0.188393	0.468	0.412	0.0425076
Snrpa1	7.25e-05	0.188368	0.655	0.549	0.00033186
Mdfi	2.26e-06	0.188161	0.474	0.315	1.54e-05
Dek	0.00603849	0.18811	0.874	0.844	0.0128532
Arpc5	0.000104576	0.188065	0.801	0.726	0.000448582
Sfrp2	0.00721754	0.187936	0.2	0.156	0.0148437
Man1a2	5.68e-05	0.187823	0.665	0.545	0.000266845
Snx3	0.000164121	0.187739	0.866	0.807	0.000648421
Atp5o.1	0.000207711	0.187608	0.98	0.957	0.000798233
Atp5g2	8.25e-05	0.187536	0.993	0.992	0.000371777
Cnih1	1.37e-05	0.187489	0.632	0.518	7.65e-05
Bcl7c	0.000132637	0.18742	0.859	0.804	0.000545069
Hmgcr	0.000581221	0.187327	0.303	0.169	0.00191922
Stub1	0.00024455	0.187304	0.896	0.872	0.000907293
Tmem9	1.77e-05	0.187267	0.636	0.51	9.51e-05
Msmo1	0.00975217	0.187258	0.214	0.119	0.0188514
Ubxn4	0.000133488	0.187175	0.761	0.665	0.000546443
Tcf12	5.2e-05	0.187111	0.635	0.498	0.000246747
Rest	0.000354863	0.187054	0.81	0.72	0.00125851
Ogfrl1	0.00783257	0.186961	0.502	0.434	0.0157914
Smdt1	0.000233305	0.186746	0.952	0.909	0.000872761
Gpx1	0.00106656	0.186743	0.874	0.84	0.00316873
Mdh2	0.000195313	0.186735	0.896	0.854	0.000754451
Mapre1	0.00015606	0.18661	0.8	0.718	0.000620933
Dhrs4	4.33e-05	0.18659	0.686	0.568	0.000208773
Gtf2b	4.78e-06	0.186426	0.541	0.395	3.03e-05
Atpif1	0.000120122	0.186062	0.995	0.996	0.000500463
Ndufb10	0.000169903	0.186041	0.921	0.879	0.000667752
Fam96a	1.6e-05	0.185849	0.623	0.51	8.73e-05
Tagln2	0.00302357	0.185828	0.945	0.877	0.0074661
Rer1	9.17e-05	0.185808	0.84	0.73	0.000404179
Hsbp1	0.000218392	0.18578	0.943	0.87	0.000827979
Rpl36	8.76e-09	0.185751	0.999	1	1.08e-07
Uqcrq	0.000333759	0.185625	0.883	0.823	0.0012026
Sec61a1	2.3e-05	0.185376	0.538	0.407	0.000117008
Psma7	0.00138329	0.185372	0.947	0.93	0.00392833
Ace2	0.000838522	0.185329	0.783	0.751	0.00259033
Clmp	0.000339629	0.185252	0.723	0.615	0.0012179
P3h3	0.000103389	0.185074	0.74	0.656	0.000446038
Psmd2	0.000168638	0.184919	0.81	0.737	0.000663938
Iqgap1	0.000230343	0.184829	0.578	0.475	0.000865996
Pcolce	0.00212579	0.18479	0.901	0.911	0.00556013
Morf4l1	0.000102151	0.184769	0.992	0.988	0.000441544
Rcn1	0.000548345	0.184633	0.963	0.924	0.00182944
Ndufs8	9.42e-05	0.184615	0.807	0.718	0.000412578
Evl	2.01e-05	0.184506	0.642	0.512	0.000104625
Krcc1	8.25e-05	0.184346	0.618	0.51	0.000371777
Laptm4a	0.000181542	0.184339	0.986	0.975	0.000707322
Ndufv1	8.72e-05	0.184329	0.751	0.667	0.000390291
Lsp1	0.0112725	0.18431	0.98	0.986	0.021224
Cd248	2.87e-05	0.184273	0.562	0.409	0.000141851
Denr	0.00014056	0.184255	0.862	0.767	0.000570344
Acp1	0.000242888	0.18415	0.822	0.72	0.000902612
Ssbp3	8.25e-05	0.184112	0.736	0.636	0.000371777
Nop58	0.00201857	0.183956	0.732	0.677	0.00535431
Atp1b3	8.38e-06	0.183801	0.512	0.368	4.95e-05
Cacybp	0.000318805	0.183782	0.794	0.71	0.00115241
Prelid3b	6.21e-06	0.183718	0.445	0.307	3.78e-05
Ehd1	1.31e-05	0.18359	0.461	0.337	7.34e-05
Mat2a	0.000263466	0.183518	0.684	0.601	0.000969486
Rpl37a	7.17e-12	0.183514	1	1	1.63e-10
Wdr83os	0.000110037	0.183318	0.752	0.665	0.000468439
Gcsh	1.48e-05	0.183274	0.573	0.447	8.15e-05
Nrk	0.000642518	0.183207	0.338	0.218	0.00207895
Clca3a1	0.000665729	0.183112	0.525	0.447	0.00213564
Hoxd10	0.000378365	0.183015	0.569	0.475	0.00133137
2310022B05Rik	0.000191757	0.182954	0.723	0.628	0.000741988
Mrpl20	0.000140462	0.182883	0.771	0.696	0.000570344
Anapc11	0.000217613	0.182837	0.752	0.681	0.000826416
Aurkaip1	0.000214933	0.182812	0.794	0.724	0.000817617
Luc7l3	0.000600793	0.182568	0.816	0.751	0.00196941
Kpnb1	5.16e-05	0.182503	0.564	0.422	0.000245489
Ifitm2	9.78e-05	0.182386	0.993	0.988	0.000425091
Ddah1	6.73e-05	0.182216	0.421	0.286	0.000309143
Golgb1	0.000157609	0.182204	0.709	0.599	0.000625987
Tpr	0.00354276	0.182117	0.914	0.881	0.00842481
Bloc1s1	1.12e-05	0.18198	0.425	0.263	6.37e-05
Svbp	0.000442689	0.181888	0.828	0.743	0.00152464
Aes	0.00523067	0.181634	0.714	0.661	0.0114698
Hnrnpk	0.00020824	0.181593	0.993	0.994	0.000798906
Cst3	0.00694634	0.181533	0.934	0.911	0.0143912
Fzd2	0.000776892	0.181381	0.816	0.726	0.00243671
Timm17b	0.000113825	0.181342	0.753	0.663	0.000480451
Eny2	0.000316446	0.181178	0.86	0.809	0.00114572
Ccdc102a	5.18e-05	0.181083	0.63	0.533	0.000246102
Puf60	0.00036174	0.181022	0.828	0.763	0.00127887
Snrnp40	2.81e-05	0.180969	0.612	0.494	0.000139182
Psmd12	0.00021104	0.180914	0.813	0.767	0.000806895
Cct3	0.00100381	0.180866	0.922	0.866	0.00302216
Mrpl13	9.61e-05	0.180711	0.726	0.638	0.000419501
Cited2	0.000973277	0.180594	0.646	0.576	0.00294234
Pdap1	0.00105743	0.180336	0.973	0.949	0.00314574
Itpa	1.06e-05	0.180321	0.488	0.333	6.12e-05
Mrps25	1.22e-05	0.180285	0.558	0.403	6.9e-05
Ndufa3	0.000533584	0.180281	0.926	0.889	0.00178814
Tsn	0.000496418	0.180031	0.834	0.774	0.00167606
Tia1	0.000483467	0.179999	0.739	0.644	0.00164466
Rbms1	0.000892509	0.179994	0.807	0.72	0.0027346
Hmgb1	0.00177476	0.179938	0.999	0.996	0.00485633
Ssrp1	0.000896742	0.179918	0.778	0.724	0.00274011
Srp19	0.000621374	0.179741	0.777	0.704	0.00202802
Hnrnpf	0.00057206	0.179728	0.973	0.963	0.00189453
Dnaja2	0.000486831	0.179641	0.811	0.745	0.00165112
Kif5b	0.0019391	0.179547	0.853	0.802	0.00521728
G3bp1	0.00105152	0.179428	0.852	0.811	0.00313646
Nexn	0.0737088	0.179396	0.641	0.551	0.092188
Rtf1	0.000785401	0.179258	0.863	0.813	0.00245656
Ctxn1	0.000237849	0.179242	0.655	0.551	0.000886814
Stard3nl	1.73e-05	0.179162	0.549	0.432	9.32e-05
Calm3	0.000808904	0.179114	0.927	0.895	0.00251263
Uqcr10	0.000622573	0.179061	0.926	0.891	0.002029
Cyp51	0.00198001	0.178957	0.301	0.165	0.00528943
Pfdn1	0.000397366	0.178871	0.848	0.796	0.0013831
Slc39a7	9.1e-05	0.178866	0.622	0.5	0.000403514
Ralgps2	0.000150209	0.178799	0.555	0.455	0.00059977
Mrpl22	1.62e-05	0.178796	0.494	0.35	8.83e-05
Top2a	0.0187098	0.178792	0.273	0.177	0.0317757
Cnot6	1.98e-05	0.17875	0.555	0.418	0.000104216
Cenpb	0.000211794	0.178544	0.737	0.625	0.000807715
Tln1	0.0034248	0.178538	0.924	0.877	0.00825765
Med8	1e-05	0.178448	0.5	0.37	5.81e-05
Sdf4	0.00012316	0.17835	0.684	0.589	0.000510786
Col6a2	0.0089118	0.178285	0.901	0.829	0.0175125
Rpl37	3.29e-09	0.178284	1	1	4.38e-08
Sec13	9.81e-05	0.178187	0.648	0.543	0.000425518
Cdc5l	0.000184379	0.178123	0.66	0.547	0.000715901
Nr2f2	0.0059862	0.178116	0.99	0.973	0.0127903
Vps36	5.63e-05	0.178058	0.575	0.447	0.00026542
Macf1	0.000649647	0.178041	0.774	0.679	0.00209549
Mylk	0.0607025	0.177818	0.865	0.827	0.0789273
Atp5g1	0.00434512	0.177813	0.968	0.947	0.00992415
Mettl23	1.74e-05	0.177753	0.532	0.399	9.38e-05
Purb	0.00175351	0.17762	0.943	0.893	0.00480403
Pdcd5	0.000733735	0.17741	0.946	0.94	0.00232401
Anp32a	0.00253562	0.177384	0.964	0.953	0.00641458
mt-Atp8	0.000557136	0.177094	0.932	0.879	0.00185328
Actr3	0.00129479	0.177075	0.888	0.804	0.00373351
Prdx5	0.00143214	0.176937	0.963	0.934	0.00405174
Pbrm1	0.00135864	0.176885	0.777	0.698	0.00388281
Nav2	6.82e-05	0.176834	0.403	0.268	0.000312607
Edf1	0.00181081	0.176794	0.934	0.903	0.004931
Rpl39	3.47e-10	0.176648	1	1	5.75e-09
Cnbp	0.00168663	0.176418	0.957	0.928	0.00464338
Nrp1	0.00220268	0.176387	0.636	0.591	0.0057148
Sub1	0.00137395	0.176365	0.994	0.992	0.00391168
Rcn2	0.000353778	0.176181	0.765	0.679	0.00125664
Serinc1	0.000132948	0.176154	0.736	0.621	0.000545355
Fgfr1	0.000158778	0.176149	0.587	0.459	0.0006292
Aldh7a1	0.000108231	0.176061	0.663	0.554	0.000462496
Rbfox2	0.000486187	0.175963	0.776	0.706	0.00165112
Ppp2ca	0.000746056	0.175906	0.916	0.879	0.00235311
Slirp	0.000114311	0.175772	0.679	0.543	0.000481173
mt-Co2	0.000149743	0.175734	0.999	1	0.000599051
Psmd6	0.000498821	0.175594	0.854	0.79	0.00168165
Ube2g1	2.72e-05	0.175409	0.397	0.261	0.000135377
6330403K07Rik	0.00459016	0.175394	0.615	0.512	0.0103681
Emp2	0.000144356	0.175297	0.551	0.44	0.000580519
Nrbp1	0.000233096	0.175265	0.693	0.593	0.000872761
Arhgdia	0.000974239	0.175141	0.859	0.823	0.00294234
Sec11a	0.000631606	0.175021	0.871	0.819	0.00204953
Ruvbl1	0.000335879	0.175011	0.748	0.654	0.00120831
F11r	9.15e-05	0.17495	0.378	0.237	0.000404179
Rbx1	0.00137615	0.174929	0.967	0.934	0.00391301
Cnn3	0.00112726	0.174812	0.887	0.844	0.00333587
Snw1	0.000518812	0.17455	0.794	0.683	0.00174123
Ndufb9	0.000962627	0.174476	0.969	0.963	0.00291768
Bex3	0.00200696	0.174444	0.964	0.947	0.00534241
Alyref	0.000620032	0.174156	0.696	0.605	0.00202658
Set	0.00901642	0.173998	0.984	0.986	0.0176565
Cul1	0.000199436	0.173903	0.703	0.578	0.000767743
Zyx	0.000185732	0.173777	0.51	0.377	0.000719911
Igfbp5	0.679274	0.173645	0.346	0.311	0.683524
Phf5a	0.000482449	0.173568	0.805	0.712	0.00164368
Idh2	0.000791591	0.173381	0.973	0.949	0.00247159
Hmg20b	0.000313503	0.173314	0.656	0.564	0.00113689
Thrap3	0.00201389	0.173287	0.774	0.706	0.00535431
Prpf40a	0.00141146	0.173088	0.808	0.751	0.00399826
Ntan1	0.000569142	0.173087	0.791	0.716	0.00189043
Abracl	0.00482572	0.172916	0.906	0.862	0.0107698
Cops4	0.000515725	0.172758	0.828	0.741	0.00173345
Psmb5	0.00237271	0.172539	0.934	0.903	0.00607197
Tcp1	0.00123254	0.172343	0.903	0.868	0.00359078
Ier3ip1	0.00044286	0.172225	0.759	0.689	0.00152464
Fkbp3	0.00474727	0.172101	0.866	0.842	0.0106483
Mettl9	0.00105676	0.172051	0.887	0.852	0.00314574
Pigp	0.000153121	0.171976	0.638	0.523	0.000610316
Txndc17	0.00146847	0.171898	0.914	0.86	0.00413374
Galnt1	3.27e-05	0.171829	0.493	0.356	0.000160249
Trir	0.00103551	0.171821	0.852	0.774	0.00310101
Snrpf	0.00351395	0.171701	0.918	0.848	0.00840064
Efemp2	0.00182842	0.17166	0.915	0.887	0.00497296
Scp2	0.000508045	0.171638	0.749	0.632	0.00171019
Eif4g3	0.000211971	0.171563	0.568	0.473	0.000807715
Polr2i	0.000412114	0.171517	0.742	0.652	0.00142563
Slbp	0.000443447	0.171455	0.601	0.486	0.00152464
Maf	0.0060636	0.171354	0.444	0.327	0.012876
Ube2l3	0.000923144	0.170957	0.86	0.792	0.00280556
Dynlrb1	0.00125044	0.170796	0.875	0.821	0.00363353
Nxf1	0.00200522	0.170769	0.838	0.761	0.00534241
Psma3	0.00505187	0.170749	0.963	0.953	0.0111647
Uba5	0.000112594	0.170648	0.606	0.496	0.000477519
Pdzd11	5.46e-05	0.170541	0.492	0.374	0.000258426
Ndufa10	0.00207508	0.170405	0.862	0.79	0.00544649
Ssr3	0.00156612	0.170219	0.852	0.79	0.0043542
Xpnpep1	0.00017836	0.170108	0.621	0.533	0.000697338
Cuedc1	0.000104146	0.169899	0.537	0.44	0.000447591
Ndufa2	0.00214146	0.169807	0.961	0.944	0.00559463
Cct8	0.00253792	0.169731	0.957	0.94	0.00641458
Maea	6.27e-05	0.169711	0.544	0.405	0.000292248
Angpt2	0.000905834	0.169554	0.27	0.195	0.00276414
Hist1h2ae	0.0189817	0.169378	0.251	0.156	0.0320021
Cdc26	0.000738596	0.169367	0.772	0.71	0.00233612
Txn2	0.000374873	0.16935	0.652	0.603	0.00132115
Nudcd2	0.000473801	0.169331	0.669	0.593	0.00162158
Kdelr1	0.00180664	0.16918	0.899	0.844	0.00492562
Ube2d3	0.00162525	0.169126	0.919	0.881	0.0044964
Ube2r2	0.00191072	0.169081	0.872	0.862	0.00514706
Cwc15	0.000890593	0.169013	0.776	0.706	0.00273245
Mycbp	0.00012443	0.16895	0.393	0.28	0.000514158
Psma1	0.000874837	0.168922	0.796	0.724	0.00269144
Sh3gl1	4.78e-05	0.168878	0.488	0.362	0.000228745
Anp32b	0.0291998	0.168757	0.964	0.975	0.0453816
Fkbp14	5.84e-05	0.168702	0.405	0.251	0.000272833
Polr2a	0.000274231	0.168692	0.632	0.533	0.00100254
Mmp2	0.00144022	0.168659	0.692	0.611	0.00406439
Rps29	5.35e-11	0.168644	1	1	1.03e-09
Ctnnb1	0.00216906	0.168506	0.914	0.872	0.00566016
Gpm6b	0.000663906	0.168448	0.533	0.436	0.00213284
Hist1h2bc	0.00257201	0.168428	0.325	0.294	0.00645272
Pdia4	0.00255646	0.168368	0.746	0.652	0.00643977
Olfml3	0.0169598	0.168317	0.877	0.85	0.0292894
Ap2s1	0.00148639	0.168303	0.841	0.774	0.00417524
Slc25a5	0.0109413	0.168292	0.804	0.745	0.0206996
Lsm2	0.00019891	0.168272	0.617	0.514	0.00076703
P3h1	0.000120227	0.168266	0.532	0.383	0.000500463
Rsu1	0.00246517	0.168143	0.927	0.868	0.00626586
Capzb	0.00382443	0.16811	0.905	0.846	0.00889734
Tecr	0.00231221	0.168008	0.89	0.819	0.00595777
Srsf7	0.00775079	0.167936	0.82	0.741	0.0156548
Colec11	0.136326	0.16779	0.136	0.064	0.152437
Ldb2	0.00939866	0.167648	0.841	0.749	0.0183184
Uqcc2	0.00249777	0.167636	0.863	0.811	0.00634158
Tmed10	0.00585631	0.167496	0.964	0.938	0.0125844
Gnai2	0.00395409	0.167394	0.981	0.975	0.00915171
Pet100	0.000230844	0.167301	0.669	0.527	0.000866436
Wdr6	0.000256656	0.16719	0.405	0.278	0.000947522
Cops6	0.00239481	0.1669	0.874	0.827	0.00611463
2010107E04Rik	0.0024449	0.166899	0.93	0.889	0.00623548
Xbp1	0.0046835	0.16678	0.761	0.679	0.0105367
Atp5g3	0.00322107	0.166765	0.927	0.899	0.007859
Hnrnpdl	0.00778359	0.166764	0.878	0.827	0.0157067
Sugt1	0.00136774	0.166738	0.766	0.714	0.00389892
Pofut2	0.000409805	0.166691	0.674	0.562	0.00141982
Tmem176a	0.0125992	0.166597	0.749	0.681	0.0231998
Unc5c	0.000582337	0.166563	0.48	0.348	0.00192009
Bub3	0.000267517	0.166509	0.641	0.531	0.000982785
Ubfd1	7.78e-05	0.166304	0.481	0.354	0.000355541
Dynll2	0.000387114	0.166247	0.586	0.475	0.0013537
Dctn2	0.00277282	0.166165	0.887	0.842	0.00692283
Tril	0.00449815	0.166107	0.856	0.829	0.0102322
Nid2	0.000290911	0.16608	0.469	0.356	0.0010618
Bmp1	0.000395291	0.165953	0.589	0.471	0.00138015
Spcs1	0.00484254	0.16594	0.895	0.864	0.0107761
Rab13	0.00217854	0.165814	0.8	0.72	0.00567175
Ddah2	0.00950909	0.165809	0.956	0.93	0.0184767
Sltm	0.00205262	0.16573	0.677	0.578	0.00540199
2900097C17Rik	0.000346684	0.16566	0.619	0.51	0.00123729
Phldb2	0.00128658	0.165652	0.562	0.461	0.00371458
Smoc2	0.135604	0.165599	0.246	0.181	0.151896
Wbp1	0.000133699	0.165573	0.539	0.432	0.000546443
Rgs7bp	0.0834761	0.165495	0.19	0.062	0.101697
Slc25a3	0.00395995	0.165446	0.984	0.979	0.00915587
Aprt	0.0444177	0.165353	0.872	0.879	0.0621682
Vps29	0.000792472	0.165237	0.76	0.652	0.00247159
Zcchc17	0.000326604	0.165218	0.634	0.523	0.0011787
Traf4	0.000113926	0.165183	0.511	0.381	0.000480451
Hnrnph1	0.00311135	0.16516	0.831	0.796	0.00762432
Srsf10	0.00116886	0.165132	0.721	0.687	0.00343026
Bola2	0.000766709	0.165016	0.683	0.609	0.00241149
Elavl1	0.000592869	0.164977	0.697	0.603	0.00194911
Dstn	0.0713491	0.164916	0.982	0.977	0.0900157
Atp5f1	0.00384583	0.164791	0.979	0.979	0.00893789
Lrpap1	0.00172512	0.164787	0.777	0.691	0.00473201
Eif1b	0.0034952	0.164761	0.835	0.776	0.0083736
1810022K09Rik	0.00220002	0.16471	0.774	0.706	0.00571447
Gpr180	6.68e-05	0.164631	0.457	0.3	0.00030759
Larp7	0.000893737	0.164506	0.619	0.554	0.00273464
Mpc2	0.00289983	0.164301	0.902	0.821	0.00722393
Mbd3	0.00218189	0.164248	0.877	0.819	0.00567391
Ddb1	0.00148877	0.164232	0.733	0.683	0.00417524
Arpc5l	0.000296949	0.164168	0.66	0.549	0.00108209
Smarca4	0.000689321	0.163937	0.544	0.442	0.0021988
Sem1	0.00464728	0.163933	0.983	0.977	0.0104762
Nrep	0.0104207	0.163832	0.837	0.759	0.0199384
Etl4	0.00251166	0.163829	0.624	0.539	0.00636966
Polr2j	0.00104539	0.163731	0.777	0.685	0.00312647
Ctnnbip1	0.000385736	0.163464	0.658	0.537	0.00135098
Pdcd10	0.00063927	0.163419	0.646	0.553	0.00207142
Rpl10a	0.000130589	0.163312	1	1	0.000537637
Ckb	0.103413	0.163194	0.65	0.626	0.121168
Wdr1	0.00063089	0.163185	0.582	0.496	0.00204953
Eif4a1	0.0319026	0.163183	0.986	0.988	0.0485765
Fnta	0.000650421	0.163067	0.678	0.584	0.00209549
Ahsa2	7.97e-05	0.163065	0.461	0.329	0.000362465
Ubn1	0.00234954	0.162967	0.742	0.683	0.00603326
Hnrnpr	0.00855793	0.162876	0.932	0.891	0.0169205
Hddc2	0.000229767	0.162803	0.483	0.395	0.000865276
Cald1	0.00715631	0.162803	0.995	0.996	0.0147313
Clns1a	0.00067968	0.162755	0.671	0.597	0.0021742
Sh3bgrl	0.00542901	0.162707	0.881	0.8	0.0118585
Fkbp2	0.00211229	0.162648	0.665	0.58	0.00553126
Tspan4	0.00464049	0.162607	0.742	0.642	0.0104713
Ccdc34	0.0121655	0.162586	0.788	0.706	0.0225117
Tmem208	0.000342244	0.162437	0.598	0.508	0.00122533
Tuba1b	0.0140054	0.162358	0.947	0.905	0.0252321
Gtpbp4	0.000548329	0.162147	0.558	0.461	0.00182944
Ogfr	0.000398467	0.161941	0.593	0.492	0.00138479
Cyc1	0.00428633	0.161793	0.813	0.753	0.00980978
Pcmt1	0.000381861	0.161793	0.624	0.518	0.00133949
Eid1	0.00565531	0.161741	0.965	0.946	0.0122459
Fis1	0.00528179	0.161722	0.911	0.901	0.0115594
Add3	0.0124429	0.161636	0.803	0.737	0.0229871
Tssc4	0.000118709	0.161439	0.473	0.346	0.00049598
2410015M20Rik	0.00372645	0.161339	0.846	0.804	0.00872345
Mrps24	0.00397179	0.161116	0.894	0.85	0.00917383
Tomm5	0.00245305	0.161105	0.816	0.718	0.00624917
Snx6	0.00296426	0.161075	0.832	0.778	0.00734379
Prmt1	0.00656623	0.161075	0.947	0.914	0.0137427
C1qtnf2	0.00104775	0.160985	0.422	0.278	0.00312934
Lamtor5	0.000914517	0.160856	0.718	0.628	0.00278568
Psmb1	0.00691416	0.160836	0.976	0.971	0.0143509
Emp1	0.00312916	0.160817	0.553	0.475	0.00765132
Ptpa	0.000149258	0.16057	0.48	0.362	0.000599051
Ssb	0.0109393	0.160564	0.944	0.922	0.0206996
Copz1	0.000336951	0.160532	0.589	0.479	0.00121023
Pdrg1	0.000268034	0.16053	0.479	0.352	0.000983081
Nono	0.00456067	0.160469	0.915	0.883	0.010343
Tbrg1	0.00596865	0.160411	0.786	0.743	0.0127649
Cenpf	0.197775	0.160399	0.179	0.101	0.212191
Ufm1	0.00153891	0.160389	0.606	0.533	0.00429446
Hs6st2	0.0116201	0.16038	0.258	0.15	0.0217708
Erp44	0.000259449	0.160348	0.557	0.442	0.000956268
Tmco1	0.00266966	0.160292	0.837	0.745	0.00668009
Nap1l1	0.0127763	0.160285	0.961	0.953	0.0234302
Tpm4	0.0222319	0.160191	0.994	0.973	0.0364648
Ube3a	0.00625243	0.16008	0.778	0.751	0.0131963
Ilf2	0.00394	0.160076	0.739	0.683	0.00913788
Fbxo22	0.00016665	0.16002	0.492	0.391	0.000657262
Fxyd7	0.159176	0.159941	0.169	0.062	0.174606
Idi1	0.149533	0.15986	0.166	0.058	0.165235
Brd3	0.00483013	0.159675	0.708	0.625	0.0107698
Fkbp4	0.00351205	0.159658	0.825	0.763	0.00840064
Sec31a	0.000974684	0.159492	0.632	0.518	0.00294234
Akirin1	0.000732967	0.159473	0.34	0.21	0.00232401
Eif4h	0.00547644	0.159431	0.876	0.833	0.011939
Dhx15	0.0013415	0.159425	0.635	0.539	0.00385339
Tspan3	0.00830125	0.159362	0.915	0.864	0.0164999
Psma2	0.00744298	0.159332	0.907	0.889	0.0152378
Rock2	0.00892941	0.159208	0.78	0.681	0.0175319
Mea1	0.000220271	0.159114	0.513	0.377	0.000833699
Rpl41	0.000106383	0.159049	1	1	0.000455464
1700020I14Rik	0.000457596	0.159022	0.592	0.494	0.0015685
Eif2s2	0.0126102	0.158834	0.97	0.951	0.0232011
Arpp19	0.0046917	0.158696	0.809	0.768	0.0105446
Tomm7	0.00867782	0.158626	0.955	0.901	0.0171275
Ndufb2	0.00310328	0.15862	0.771	0.698	0.00762114
Pgp	0.000822957	0.158616	0.529	0.453	0.00254924
mt-Nd2	0.00361722	0.158597	0.999	0.996	0.00854904
Utp3	0.00190927	0.158449	0.716	0.644	0.00514706
Rwdd1	0.00701415	0.158438	0.845	0.802	0.0145049
Snapc5	0.000236137	0.158382	0.511	0.403	0.00088189
Brk1	0.00458549	0.158319	0.87	0.833	0.010368
Ndufs2	0.0082818	0.158242	0.922	0.905	0.0164758
Eci2	0.00336468	0.158209	0.802	0.726	0.00813884
Ctdsp2	0.00206753	0.158183	0.734	0.644	0.005433
Rpl27	0.00914576	0.158074	0.961	0.94	0.0178942
Lasp1	0.000305739	0.158012	0.537	0.395	0.00111232
Lman1	0.00403267	0.157897	0.866	0.792	0.00926691
Hnrnpab	0.024307	0.157888	0.868	0.835	0.0392678
Ggnbp2	0.000645918	0.157886	0.581	0.494	0.00208695
Sema5a	0.00164365	0.157717	0.512	0.418	0.00453998
Eif4g1	0.00678533	0.157699	0.672	0.597	0.0141487
Gdi2	0.00821409	0.157686	0.922	0.887	0.0163786
Sumo3	0.00582806	0.157651	0.809	0.768	0.0125476
Tcf3	0.000802715	0.157623	0.616	0.523	0.00249684
Lman2	0.000773453	0.157521	0.631	0.519	0.00242931
Snf8	0.00110418	0.157191	0.668	0.566	0.00327618
Cdc16	0.0012596	0.157006	0.696	0.591	0.00365543
Mrps21	0.00373061	0.156973	0.809	0.733	0.00872413
Vcan	0.035374	0.156874	0.48	0.426	0.0525476
Mocs2	0.000819669	0.156803	0.656	0.512	0.00254255
Eef1g	0.0129131	0.156779	0.994	0.992	0.0236041
Psmb7	0.00255974	0.156768	0.73	0.652	0.00644082
Cope	0.00654092	0.156763	0.895	0.809	0.0137025
Ets1	0.00113709	0.156762	0.616	0.519	0.00336053
Rap1b	0.00367934	0.156703	0.747	0.66	0.00864829
Cox19	0.000239052	0.156431	0.489	0.37	0.000889828
Mettl1	0.00150917	0.156424	0.51	0.366	0.0042193
Dnajc9	0.00452766	0.156263	0.451	0.391	0.0102889
Dgcr6	0.00146044	0.15623	0.674	0.597	0.00411629
L3hypdh	0.000494348	0.15615	0.375	0.272	0.00167158
Hnrnpd	0.0152986	0.156122	0.959	0.912	0.0270428
Emc3	0.00069148	0.156101	0.607	0.49	0.00220257
Zfp771	0.00187421	0.156072	0.689	0.626	0.00506689
Cbx1	0.0141361	0.156059	0.916	0.881	0.0253661
Psmd3	0.00254195	0.156052	0.702	0.621	0.00641526
Zfp706	0.00308539	0.155888	0.767	0.654	0.00758547
Col6a1	0.0283298	0.155878	0.889	0.831	0.0443355
Psmd13	0.00321342	0.155845	0.741	0.687	0.00784884
Lmna	0.0017227	0.155815	0.624	0.553	0.00473114
2410004B18Rik	0.000306836	0.155771	0.446	0.317	0.00111451
Zfp422	0.000374573	0.155625	0.535	0.422	0.00132115
Mrpl42	0.00759919	0.155384	0.847	0.772	0.0154872
Lap3	0.00587854	0.155378	0.681	0.589	0.0126081
Dcakd	0.00111234	0.155277	0.588	0.455	0.00329604
Fam103a1	0.000482264	0.155211	0.592	0.469	0.00164368
Ndufc2	0.0100477	0.155117	0.937	0.897	0.0193396
Parva	0.00669414	0.155058	0.777	0.718	0.0139844
Armc1	0.000539738	0.154997	0.58	0.457	0.00180608
Cox6a1	0.0112187	0.154852	0.9	0.877	0.0211418
Ahsa1	0.00136288	0.154827	0.646	0.56	0.00388998
Nedd4	0.0184609	0.154673	0.999	0.998	0.0314002
Nenf	0.0128007	0.154663	0.956	0.936	0.0234558
Smarcb1	0.00227867	0.154659	0.686	0.617	0.00588812
Eif4e2	0.00763069	0.154657	0.816	0.765	0.0155042
Hnrnph3	0.00306515	0.154656	0.674	0.607	0.00755222
Dbn1	0.00508218	0.154548	0.705	0.613	0.0112206
Mrps15	0.0020418	0.15452	0.691	0.586	0.00539054
Odc1	0.0101923	0.154354	0.656	0.57	0.0195678
Nradd	0.00128195	0.15431	0.492	0.403	0.00370597
Acin1	0.00636861	0.154152	0.796	0.704	0.0133913
Pdlim7	0.0188154	0.1541	0.691	0.623	0.0318349
Cdk7	0.000553907	0.154091	0.531	0.434	0.00184526
Dusp11	0.00197069	0.153816	0.595	0.514	0.00527077
Rai14	0.00291441	0.153808	0.574	0.479	0.00725221
Pak2	0.00135083	0.153722	0.636	0.541	0.00387032
Ube2d2a	0.00561515	0.153609	0.79	0.718	0.0121941
Srrm2	0.0337078	0.153401	0.98	0.969	0.050567
Psmc6	0.00787422	0.15335	0.865	0.815	0.0158328
Smim19	0.000479193	0.153342	0.465	0.364	0.00163755
Plin3	0.00162107	0.153337	0.638	0.533	0.00449315
Ppp2r1a	0.00168925	0.153337	0.617	0.533	0.00464492
Upf3b	0.00140484	0.153303	0.55	0.473	0.00398451
Calu	0.0114075	0.153126	0.859	0.815	0.0214294
Ormdl3	0.000351584	0.153059	0.418	0.294	0.00125081
Dazap1	0.00486016	0.153059	0.734	0.695	0.0108046
Itgb1	0.0105403	0.15284	0.987	0.975	0.0201159
Ufc1	0.00739416	0.152728	0.795	0.755	0.0151516
Gtf3c6	0.00227995	0.152668	0.588	0.535	0.00588812
Rpp21	0.000742551	0.15254	0.527	0.416	0.00234534
Cdc123	0.00126182	0.152527	0.599	0.512	0.00365716
Prdx6	0.0196578	0.152503	0.823	0.774	0.0328896
Snrnp70	0.0150614	0.152474	0.92	0.872	0.0267073
Ccl11	0.128778	0.152468	0.144	0.105	0.145132
Snrpd3	0.0195471	0.152418	0.853	0.784	0.0327774
Ptprf	0.00117562	0.152342	0.354	0.243	0.00344279
Cops3	0.00256428	0.152212	0.669	0.582	0.00644504
Fmc1	0.000780938	0.15204	0.482	0.377	0.002446
Glrx5	0.00339568	0.152034	0.702	0.621	0.00819622
Islr	0.00486844	0.151943	0.659	0.611	0.0108124
Ptpn1	0.00127268	0.151906	0.53	0.418	0.00368391
Zranb2	0.0096755	0.151827	0.807	0.765	0.0187642
Med10	0.000852162	0.151676	0.568	0.471	0.00262886
Tnrc6b	0.00410028	0.151596	0.727	0.644	0.00940308
Gng5	0.0220722	0.151586	0.99	0.979	0.0362822
U2af1	0.0122848	0.151547	0.891	0.809	0.0227137
S1pr2	0.000396046	0.151542	0.459	0.331	0.00138065
Dpm3	0.0140681	0.151433	0.909	0.872	0.0253249
Gnb2	0.0237534	0.151417	0.986	0.961	0.0385847
Htatsf1	0.00121145	0.151263	0.578	0.469	0.00354309
Cd63	0.014969	0.151143	0.999	0.994	0.0265854
Tprgl	0.00476705	0.151076	0.741	0.632	0.010682
Ash2l	0.00100139	0.151006	0.564	0.434	0.00301891
Irak1bp1	0.0013016	0.150996	0.368	0.237	0.00374835
Rpl14	0.00312006	0.150971	0.999	1	0.00763736
Eif4ebp1	0.0101332	0.150872	0.773	0.71	0.019471
Ndufab1	0.0139689	0.150836	0.859	0.823	0.0251865
Sppl3	0.000455687	0.150805	0.493	0.356	0.00156434
Psmd11	0.00562877	0.15076	0.763	0.706	0.0122119
Mgll	0.113769	0.150753	0.191	0.101	0.130651
Cnpy2	0.0354027	0.150707	0.945	0.926	0.0525556
Gm16152	0.0746106	0.150685	0.215	0.068	0.0931392
Wdr82	0.00067888	0.150608	0.397	0.282	0.0021742
Apip	0.000618263	0.150576	0.48	0.368	0.00202373
Ndufa1	0.0114094	0.15052	0.753	0.679	0.0214294
Nfic	0.00747866	0.150483	0.733	0.642	0.015297
Stk25	0.00100602	0.150453	0.556	0.457	0.00302478
Map2k2	0.00852415	0.150387	0.814	0.767	0.0168982
Ube2j2	0.000793497	0.150285	0.555	0.426	0.00247159
Tead2	0.00813811	0.150285	0.745	0.677	0.0162762
Adrm1	0.00189217	0.150255	0.638	0.516	0.00510931
Eva1b	0.0263788	0.150213	0.992	0.975	0.0420249
Golga7	0.00785866	0.149844	0.766	0.687	0.0158156
Ube2c	0.0871981	0.149676	0.253	0.185	0.105292
Pa2g4	0.0144022	0.149675	0.721	0.675	0.0257821
Atp5b	0.0247857	0.149555	0.99	0.992	0.0398412
Coa3	0.00969632	0.149549	0.856	0.794	0.0187757
Papss1	0.00483563	0.149531	0.749	0.658	0.0107714
Hnrnpa0	0.0603639	0.149526	0.97	0.969	0.0785777
Map2k3	0.000628813	0.149342	0.498	0.391	0.00204637
Ssna1	0.00226111	0.149313	0.655	0.539	0.00585341
Lsm8	0.00307253	0.149216	0.656	0.568	0.00756213
Med21	0.00185346	0.149189	0.628	0.554	0.00501681
Stip1	0.00184048	0.149142	0.568	0.496	0.00499971
Foxd1	0.449964	0.14909	0.352	0.323	0.458931
Airn	0.00184659	0.149049	0.394	0.278	0.00500423
Itm2b	0.0261933	0.149038	0.998	0.994	0.0418457
Cox7a2	0.0294306	0.148973	0.952	0.932	0.0456773
Mtpn	0.00407418	0.148933	0.619	0.551	0.00935275
Laptm4b	0.00122179	0.148885	0.55	0.43	0.00356871
Sae1	0.00704202	0.148782	0.739	0.656	0.0145359
Cmpk1	0.00232797	0.148691	0.649	0.543	0.0059847
Fkbp7	0.00362158	0.148663	0.647	0.533	0.00854904
2610524H06Rik	0.00088932	0.148658	0.531	0.401	0.00273226
Dnajc2	0.00135773	0.148642	0.514	0.399	0.00388281
Lamtor1	0.010341	0.148582	0.815	0.765	0.0198133
Gulp1	0.00203938	0.148402	0.525	0.44	0.00539054
Nhp2	0.00184533	0.148352	0.55	0.428	0.00500423
Ddx6	0.00623548	0.148342	0.634	0.537	0.0131729
Atg101	0.000756114	0.148329	0.45	0.325	0.00238149
Ehd2	0.00203436	0.14832	0.362	0.261	0.00538985
Ttc19	0.00102643	0.148229	0.572	0.461	0.00308202
Mrps18c	0.00161731	0.148093	0.55	0.463	0.00449098
Polr3k	0.000727998	0.147911	0.453	0.352	0.00231234
Psap	0.0275303	0.147775	0.847	0.786	0.0433982
Olfm1	0.00195123	0.1476	0.408	0.319	0.00523739
Prkra	0.00355765	0.147551	0.666	0.572	0.0084513
Psmd1	0.0103465	0.147511	0.703	0.656	0.0198133
Gorasp2	0.000953054	0.147503	0.48	0.356	0.00289256
Hook3	0.00605156	0.147479	0.686	0.588	0.0128688
Fam114a1	0.00575332	0.147452	0.574	0.5	0.0124104
Surf4	0.00298181	0.147447	0.606	0.506	0.00737105
Fubp1	0.0597072	0.14743	0.866	0.854	0.0780387
Ccnd1	0.354396	0.147375	0.419	0.42	0.365431
Psmc3	0.0195756	0.147333	0.899	0.842	0.0327895
Atp6v0d1	0.00254388	0.147257	0.646	0.518	0.00641526
Col16a1	0.00631272	0.147128	0.539	0.467	0.0133111
Atxn10	0.0281988	0.147125	0.903	0.858	0.0441611
Lrrc42	0.00134484	0.147118	0.479	0.375	0.00385805
Mrps7	0.00366846	0.147012	0.647	0.566	0.00863257
Ndufb5	0.0286692	0.147008	0.952	0.942	0.0448043
Mlec	0.0245281	0.146935	0.697	0.65	0.03954
Eif3c	0.0293432	0.146916	0.943	0.903	0.0455731
Ugp2	0.00149796	0.146855	0.611	0.475	0.00419578
Yaf2	0.00614133	0.146835	0.642	0.547	0.0129984
Parp1	0.00166204	0.14682	0.488	0.387	0.0045813
Gpat4	0.00103543	0.146766	0.399	0.274	0.00310101
Nfia	0.0171251	0.146746	0.785	0.724	0.029507
Paip2	0.0187302	0.146736	0.934	0.881	0.0317863
Nfix	0.0658342	0.146736	0.889	0.844	0.084526
Wsb2	0.000680832	0.146706	0.451	0.333	0.0021748
Pnn	0.0438185	0.146609	0.877	0.842	0.0616746
Pafah1b2	0.00426035	0.146588	0.659	0.566	0.00976022
Taf12	0.00164504	0.14642	0.381	0.259	0.00453998
Map1lc3b	0.0323705	0.146416	0.939	0.874	0.0490568
Sox12	0.00232178	0.146382	0.579	0.482	0.0059756
Rnaseh2c	0.0253695	0.146358	0.675	0.611	0.0406924
Dnm1l	0.00179894	0.146338	0.531	0.444	0.00491653
Srsf9	0.0177579	0.146322	0.872	0.837	0.0304344
Podxl2	0.00593154	0.146272	0.644	0.545	0.0126976
Cuedc2	0.0099647	0.146259	0.771	0.73	0.0192128
Cops8	0.00400254	0.146156	0.662	0.582	0.00920707
Phb2	0.026493	0.146044	0.906	0.875	0.0420748
Spc24	0.0787905	0.146017	0.217	0.132	0.0970127
Nars	0.00751721	0.145985	0.732	0.654	0.0153507
Dap	0.00724861	0.145964	0.643	0.605	0.0148805
Rhoj	0.00817271	0.14587	0.507	0.438	0.0163309
Tns3	0.00438347	0.145843	0.567	0.508	0.00999148
Mcfd2	0.00087103	0.145839	0.411	0.28	0.00268339
Cap1	0.0034418	0.145831	0.667	0.553	0.00828092
Igf2r	0.00361874	0.145827	0.499	0.397	0.00854904
Mmadhc	0.00115539	0.145809	0.476	0.375	0.00340123
Gtf2h5	0.0174731	0.145799	0.868	0.813	0.0300148
Cdk9	0.00208748	0.145712	0.545	0.434	0.00547265
Hmbs	0.0013056	0.145676	0.443	0.34	0.00375506
Cirbp	0.00511747	0.145594	0.593	0.496	0.0112765
Fam133b	0.0101265	0.145555	0.689	0.586	0.019471
Ncam1	0.973004	0.145525	0.87	0.821	0.973436
Hic1	0.0446013	0.145487	0.735	0.656	0.0623477
Mrpl52	0.0330793	0.145466	0.926	0.903	0.0498682
1110038F14Rik	0.0135796	0.145441	0.795	0.741	0.0246822
Nans	0.00162208	0.145347	0.537	0.442	0.00449315
Pycrl	0.00116982	0.14531	0.47	0.354	0.00343026
Vamp8	0.00356325	0.145233	0.564	0.482	0.00845569
Tgfb2	0.00342986	0.145226	0.366	0.249	0.00826102
Atp6v0e	0.0189513	0.144989	0.831	0.772	0.0320021
Phf20l1	0.00653201	0.144906	0.545	0.484	0.0136965
Hars	0.00122395	0.144877	0.512	0.412	0.00357039
Rdx	0.0391017	0.144764	0.95	0.912	0.056483
Cfdp1	0.0336281	0.144748	0.949	0.934	0.0504871
Sf3b2	0.0404832	0.1447	0.913	0.899	0.0580688
Uqcrb	0.0424755	0.14465	0.951	0.951	0.0603501
Sri	0.0316872	0.144638	0.896	0.864	0.0483794
Angpt1	0.00201648	0.144633	0.375	0.257	0.00535431
Vstm4	0.0333687	0.144621	0.779	0.7	0.050198
Thra	0.0204135	0.144541	0.84	0.8	0.0340023
Csnk2b	0.0104792	0.144537	0.791	0.691	0.0200163
Cct7	0.0353077	0.144467	0.907	0.889	0.0525043
Auts2	0.0703899	0.144463	0.823	0.759	0.0891552
Khdrbs1	0.0346919	0.144428	0.798	0.776	0.0517391
Bmyc	0.00236477	0.144398	0.61	0.477	0.00605854
Agtr2	0.114247	0.144203	0.199	0.119	0.131133
Srp72	0.0177895	0.144172	0.795	0.712	0.0304654
Wnk1	0.00802391	0.143947	0.652	0.566	0.0160907
Trim28	0.0195834	0.143883	0.755	0.683	0.0327895
Rrp1	0.0285369	0.14387	0.852	0.798	0.0446286
Tor2a	0.002706	0.143835	0.589	0.494	0.00676349
Kpna4	0.0015101	0.143809	0.48	0.372	0.0042193
Tardbp	0.00481845	0.143761	0.606	0.502	0.0107698
Cdc42ep1	0.00329932	0.143628	0.327	0.196	0.00801518
Ube2v2	0.0085433	0.14347	0.757	0.644	0.0169064
Sptlc2	0.00148851	0.1434	0.387	0.245	0.00417524
Tfg	0.00200221	0.143392	0.551	0.455	0.0053424
Yeats4	0.00480249	0.143324	0.621	0.523	0.0107507
mt-Co1	0.163532	0.143321	0.999	1	0.178823
Hdac2	0.0166826	0.143147	0.788	0.71	0.0289439
Atrx	0.0832318	0.143106	0.909	0.889	0.101482
Plekhg2	0.00124295	0.14288	0.461	0.325	0.00361644
Mrpl12	0.00985163	0.142772	0.693	0.623	0.0190273
Syncrip	0.0251196	0.142755	0.742	0.698	0.0403202
Nsmce1	0.0094032	0.142714	0.711	0.621	0.0183184
Pbx1	0.654992	0.142707	0.961	0.965	0.659679
Eif4e	0.00339386	0.142689	0.603	0.516	0.00819622
Rpl36a	0.0338655	0.142622	1	1	0.0506846
Specc1	0.00326694	0.142575	0.335	0.218	0.0079451
Ndufb6	0.0187883	0.142382	0.827	0.765	0.0318129
Naa20	0.00296205	0.142354	0.591	0.463	0.00734379
Ddx56	0.00789018	0.142272	0.304	0.193	0.0158508
Rps5	0.0201497	0.142178	1	1	0.0336626
Phc2	0.00394423	0.142143	0.531	0.424	0.00913828
Lactb	0.00353501	0.142124	0.347	0.235	0.0084177
Gm17018	0.00156428	0.142025	0.471	0.362	0.0043542
Ss18	0.00196914	0.141973	0.513	0.412	0.00527077
Srpx	0.00353603	0.141939	0.438	0.346	0.0084177
Zrsr2	0.00566631	0.141931	0.646	0.57	0.012258
Brd7	0.00821839	0.141925	0.698	0.588	0.0163786
Tm4sf1	0.168475	0.14175	0.535	0.496	0.183731
Cldn11	0.350041	0.141736	0.464	0.484	0.361602
Trappc4	0.00832152	0.141701	0.662	0.57	0.0165256
Fbln7	0.0566208	0.141698	0.221	0.134	0.0750943
Mrpl58	0.011868	0.14169	0.758	0.685	0.0221066
Prpf19	0.0110771	0.141634	0.718	0.57	0.0208925
Bax	0.0315582	0.141619	0.81	0.761	0.0482151
Timm22	0.00262929	0.14153	0.573	0.463	0.00658639
Anp32e	0.0139031	0.141518	0.615	0.531	0.0251283
Eri3	0.00288423	0.141501	0.542	0.44	0.007193
Psma5	0.0352667	0.14146	0.907	0.866	0.0524921
Tmem214	0.00360025	0.141439	0.345	0.224	0.00853448
Phf14	0.0168039	0.141315	0.733	0.671	0.0290871
Bloc1s2	0.0015514	0.141252	0.413	0.29	0.00432396
Ccne1	0.107238	0.141173	0.222	0.115	0.124549
Mex3a	0.00371237	0.141077	0.484	0.381	0.00869954
Nts	NA	0.141002	0.105	0.089	NA
Timm50	0.00194609	0.140995	0.507	0.381	0.00522983
Lamtor2	0.0291294	0.140983	0.862	0.825	0.0453034
Carmn	0.00333642	0.140839	0.445	0.375	0.00807916
Mff	0.00986138	0.140791	0.683	0.597	0.0190298
Egln2	0.00324295	0.140761	0.576	0.457	0.00789527
Npdc1	0.0139264	0.140749	0.305	0.185	0.02513
Foxc2	0.01207	0.140704	0.625	0.537	0.0223717
Cct5	0.0759136	0.140648	0.979	0.957	0.0944516
Nsmce4a	0.00703038	0.140575	0.64	0.556	0.0145252
Ppp4r2	0.0110552	0.140449	0.693	0.617	0.0208686
Nap1l4	0.0127718	0.140304	0.72	0.636	0.0234302
Txndc12	0.003107	0.140282	0.585	0.484	0.00762198
Krit1	0.00512303	0.140273	0.557	0.473	0.0112777
Ntmt1	0.00203971	0.140236	0.523	0.426	0.00539054
Cpxm1	0.0164941	0.140202	0.649	0.574	0.0287141
Tcerg1	0.00482925	0.140133	0.519	0.418	0.0107698
Rps20	0.0572192	0.14013	1	1	0.0757096
Gbf1	0.00251608	0.140079	0.461	0.356	0.00637369
Hnrnpa1	0.219697	0.14007	0.982	0.988	0.233486
Ano6	0.00180455	0.139814	0.422	0.329	0.00492562
Nid1	0.0346415	0.139696	0.87	0.835	0.0516983
Zc3h15	0.0503219	0.139656	0.89	0.858	0.0684742
Aen	0.00592916	0.139605	0.322	0.21	0.0126976
Rpsa	0.157386	0.139535	1	1	0.172979
Eif4g2	0.0758288	0.139533	0.963	0.953	0.0943983
Tcaf1	0.0142611	0.139459	0.606	0.5	0.0255701
Strap	0.014106	0.139457	0.714	0.65	0.0253661
Aph1a	0.00302811	0.139339	0.563	0.455	0.00746912
Psmc1	0.0208686	0.139266	0.691	0.642	0.0345052
Mrpl18	0.0221666	0.139225	0.766	0.708	0.0363843
Msl1	0.00205333	0.139207	0.493	0.377	0.00540199
Thap12	0.00513451	0.139025	0.541	0.446	0.0112919
Psma6	0.0356972	0.138984	0.827	0.798	0.0527148
Eml4	0.0298955	0.138868	0.761	0.722	0.0463349
Rbm7	0.00345648	0.138866	0.562	0.455	0.0082985
Pold2	0.00226131	0.138842	0.391	0.278	0.00585341
Ap2m1	0.0333642	0.138798	0.829	0.78	0.050198
Cdc37	0.0722919	0.138665	0.942	0.901	0.0909505
Sumo1	0.0640568	0.138662	0.924	0.899	0.0827156
Rsrp1	0.0421027	0.138515	0.899	0.846	0.0599338
Ctnna1	0.0372964	0.138456	0.845	0.794	0.0545399
Timm17a	0.0118812	0.138405	0.722	0.619	0.0221127
Nsg1	0.00435129	0.138315	0.406	0.294	0.00992817
Dpf2	0.00246116	0.13828	0.403	0.311	0.00626274
Elof1	0.0146677	0.13824	0.742	0.648	0.0261534
Sgta	0.0130842	0.138155	0.712	0.605	0.0238976
Rnps1	0.00700468	0.138088	0.566	0.488	0.0144987
Aldh1a2	0.15428	0.138042	0.421	0.358	0.16973
Dtymk	0.016651	0.138014	0.685	0.599	0.0289337
Ubtf	0.0186323	0.137995	0.729	0.656	0.0316678
Prpsap1	0.00465609	0.137907	0.543	0.446	0.0104855
Tipin	0.0103061	0.137878	0.453	0.362	0.0197695
Ccdc59	0.0133474	0.137863	0.686	0.595	0.0243586
Tmem263	0.00323413	0.137818	0.481	0.374	0.00788232
Psmd4	0.0355085	0.137809	0.837	0.79	0.0525741
Gtf2a2	0.0141232	0.137745	0.674	0.609	0.0253661
Slc3a2	0.031547	0.137745	0.635	0.56	0.0482151
Gfer	0.00239433	0.137661	0.45	0.36	0.00611463
Adamts2	0.012744	0.137635	0.305	0.208	0.0234091
Dnlz	0.00763566	0.137623	0.592	0.523	0.0155042
Sf3a2	0.00230649	0.137582	0.371	0.243	0.00594984
Efna2	0.00380839	0.137582	0.362	0.233	0.00886918
Matr3	0.0356764	0.137557	0.811	0.733	0.0527148
Gsn	0.179364	0.137489	0.794	0.728	0.194664
Ptpra	0.00894658	0.137484	0.649	0.535	0.0175381
4930453N24Rik	0.00235969	0.137433	0.482	0.379	0.00605242
Ube2f	0.00296817	0.137385	0.387	0.284	0.00734541
Rps11	0.12031	0.137363	0.999	1	0.137033
Zfp9	0.00646333	0.137311	0.323	0.196	0.0135652
Selenon	0.00294386	0.137292	0.516	0.407	0.00730935
Emc4	0.00375787	0.137266	0.498	0.395	0.00877876
Plgrkt	0.00553142	0.137229	0.58	0.5	0.0120355
Rbbp4	0.036358	0.137044	0.835	0.78	0.0535213
Snrpe	0.126469	0.136892	0.95	0.932	0.143336
Cenpx	0.0128366	0.136865	0.661	0.593	0.0235025
Yif1b	0.0117518	0.136822	0.681	0.609	0.0219626
Nae1	0.00257307	0.136822	0.498	0.397	0.00645272
Ndufb11	0.0790365	0.136796	0.956	0.938	0.0972623
Chtop	0.00894817	0.136789	0.624	0.545	0.0175381
Ptprs	0.0206685	0.13674	0.714	0.636	0.0343003
Rraga	0.0207372	0.136622	0.678	0.591	0.034389
Nbdy	0.00731214	0.136586	0.632	0.554	0.0149972
Ccnd3	0.0817162	0.13653	0.834	0.774	0.100014
Hnrnpu	0.104717	0.136501	0.944	0.92	0.122441
Ddrgk1	0.0188955	0.136481	0.712	0.648	0.0319464
Psmd14	0.00601701	0.13646	0.592	0.498	0.0128317
Ltbp4	0.0521257	0.136377	0.658	0.578	0.07004
Mki67	0.15247	0.136299	0.208	0.146	0.168233
Kras	0.0204363	0.13627	0.629	0.547	0.0340151
Ift43	0.00585628	0.136185	0.56	0.469	0.0125844
Ppp2r2d	0.00346045	0.136168	0.455	0.344	0.00829919
Mrpl41	0.00474081	0.13613	0.543	0.434	0.0106444
Stx2	0.00490135	0.136088	0.416	0.309	0.0108747
Rfc3	0.0107306	0.136071	0.453	0.393	0.0204271
Fblim1	0.0198133	0.136013	0.613	0.549	0.0331252
Ppig	0.0523521	0.13599	0.884	0.819	0.0702604
Zfp644	0.0325449	0.135975	0.782	0.689	0.0491886
Zfp846	0.0483086	0.135965	0.258	0.128	0.066417
Klf2	0.187463	0.135963	0.414	0.331	0.201608
Chd4	0.125179	0.135952	0.853	0.829	0.141945
B2m	0.00712692	0.13592	0.582	0.492	0.0146842
Ppp3ca	0.0729485	0.135905	0.716	0.679	0.0914657
Cdo1	0.00871813	0.135885	0.329	0.253	0.0171769
S100a16	0.0237642	0.135823	0.369	0.284	0.0385847
Dicer1	0.00499886	0.135808	0.401	0.311	0.0110693
Copg1	0.00642932	0.135797	0.604	0.498	0.0135064
Eef1a1	0.0513805	0.135785	1	1	0.069353
2810474O19Rik	0.0264468	0.135765	0.638	0.533	0.0420609
Efr3a	0.00549423	0.135724	0.369	0.265	0.0119661
Bclaf1	0.0351622	0.135698	0.765	0.691	0.0523712
Bag6	0.00527034	0.135695	0.442	0.346	0.0115455
Stt3a	0.00331241	0.135688	0.482	0.372	0.00803831
Pafah1b1	0.0794063	0.135675	0.901	0.848	0.0976108
Rsl1d1	0.027407	0.135642	0.72	0.625	0.0432519
Map4	0.00820762	0.135609	0.561	0.442	0.0163786
Ctbp2	0.0145275	0.135579	0.623	0.539	0.025965
Smarcd2	0.00292001	0.135557	0.436	0.327	0.00725814
Smim8	0.00444892	0.135516	0.379	0.265	0.0101304
Ttyh3	0.00606635	0.135468	0.356	0.243	0.012876
Eif1a	0.0060966	0.135401	0.529	0.451	0.012928
Rpl8	0.0814083	0.135379	1	1	0.0997452
Crk	0.00377089	0.135359	0.377	0.251	0.00879381
Rpl11	0.0779605	0.135358	1	1	0.0962539
Rbpms	0.09681	0.135295	0.875	0.837	0.114444
D10Jhu81e	0.00393287	0.135266	0.471	0.36	0.00913075
Ndufb7	0.0431088	0.13524	0.853	0.784	0.0610573
Timm8b	0.0330831	0.135232	0.704	0.64	0.0498682
Prkcsh	0.0119139	0.13518	0.663	0.597	0.0221553
Tmem50a	0.050024	0.135062	0.901	0.852	0.0681925
Rflnb	0.0125477	0.135021	0.4	0.307	0.023124
Ankrd11	0.0939323	0.134994	0.882	0.846	0.111746
Cfap36	0.00770255	0.134939	0.536	0.446	0.015599
Lsm12	0.031769	0.134935	0.74	0.669	0.0484714
Commd7	0.00956815	0.134916	0.591	0.482	0.0185754
Ubl4a	0.00544724	0.134916	0.496	0.418	0.0118868
Cep164	0.00504243	0.134847	0.469	0.352	0.0111548
Peak1	0.023179	0.134751	0.73	0.65	0.0377981
Med28	0.0119577	0.134736	0.668	0.572	0.0222002
Farsb	0.00352605	0.134733	0.395	0.267	0.00841171
Abhd17a	0.0180095	0.134712	0.69	0.605	0.0307719
9530068E07Rik	0.0155646	0.134652	0.68	0.605	0.0274053
Lbh	0.111824	0.134639	0.919	0.905	0.128914
Igf2	0.00879195	0.134611	0.338	0.233	0.0172921
Mrpl30	0.0369971	0.134575	0.76	0.728	0.0542078
Rps7	0.128397	0.134565	1	1	0.144865
Nsmce2	0.00581539	0.134564	0.564	0.463	0.0125323
Cdk1	0.0146215	0.134521	0.342	0.261	0.0261123
Nucb1	0.0277245	0.134509	0.755	0.66	0.0436003
Mydgf	0.0204602	0.134476	0.689	0.617	0.0340298
Slc35b1	0.00332211	0.134452	0.462	0.352	0.00805317
Ndufs3	0.0459102	0.134405	0.77	0.739	0.0637421
Obsl1	0.00399554	0.134394	0.405	0.292	0.00920707
Rheb	0.0325146	0.134382	0.795	0.718	0.0491759
Hsd17b10	0.0798749	0.134324	0.907	0.889	0.0980798
Flrt2	0.114585	0.134175	0.518	0.479	0.131455
Smn1	0.00344673	0.134148	0.476	0.375	0.00828393
Trim33	0.00370405	0.13411	0.431	0.305	0.0086891
Chchd2	0.234111	0.134102	0.999	0.996	0.247753
Ttc3	0.150845	0.134087	0.939	0.932	0.166603
Mrps14	0.0391779	0.134046	0.827	0.749	0.0565568
Magoh	0.0299642	0.134036	0.71	0.673	0.0463776
Bud31	0.00859813	0.134029	0.617	0.518	0.0169851
Vasp	0.024247	0.134024	0.693	0.609	0.039199
Gins4	0.00432237	0.134011	0.494	0.389	0.0098822
Ankrd17	0.0164579	0.13381	0.636	0.551	0.0286868
Rp9	0.0937968	0.133767	0.864	0.833	0.111644
Uba1	0.0192551	0.133761	0.598	0.525	0.0324085
Adam12	0.13572	0.133735	0.198	0.089	0.15191
Sorbs1	0.00400098	0.133565	0.407	0.29	0.00920707
Sin3b	0.0456036	0.13354	0.819	0.774	0.0634337
Col23a1	0.145601	0.133454	0.24	0.195	0.161421
Ccdc80	0.184082	0.133267	0.897	0.813	0.198826
Cox20	0.0264203	0.13318	0.681	0.626	0.0420485
Ralb	0.00775095	0.133162	0.598	0.488	0.0156548
Grcc10	0.00458029	0.133097	0.438	0.323	0.0103666
Tm7sf3	0.0121473	0.133094	0.322	0.21	0.0224964
Aip	0.014636	0.133083	0.653	0.558	0.0261174
Epc1	0.00784645	0.133063	0.347	0.23	0.0158052
Ktn1	0.0591889	0.133028	0.832	0.761	0.0776629
Smap1	0.0726055	0.132979	0.871	0.807	0.0911922
Hmgcl	0.00366035	0.13292	0.405	0.274	0.00862249
Pdzd2	0.00774379	0.132918	0.428	0.327	0.0156548
Nelfb	0.00453774	0.132726	0.511	0.387	0.0103014
Suclg1	0.0504084	0.132692	0.829	0.782	0.0684914
Rfc2	0.0107651	0.132682	0.456	0.379	0.0204582
Pitpna	0.0189994	0.132568	0.679	0.599	0.0320021
Usp10	0.0288584	0.132379	0.278	0.165	0.0449803
Mrpl14	0.0306295	0.132325	0.718	0.66	0.0471804
Ggh	0.0045684	0.132321	0.51	0.385	0.0103501
Smarcd1	0.0076096	0.132267	0.493	0.397	0.0154944
Sdf2l1	0.0309072	0.132234	0.277	0.169	0.047543
Serf1	0.112504	0.132217	0.926	0.911	0.129396
Snx17	0.0272282	0.132171	0.687	0.638	0.0430301
Prpf4b	0.0836245	0.132107	0.874	0.833	0.101796
Rab14	0.0974739	0.132012	0.92	0.889	0.115108
AI837181	0.00368282	0.131979	0.432	0.313	0.00864829
Hspa13	0.00636641	0.13195	0.47	0.358	0.0133913
Ndufa13	0.142072	0.131854	0.982	0.979	0.158232
Rac3	0.00764196	0.131768	0.508	0.414	0.0155042
Epas1	0.01875	0.131749	0.296	0.216	0.0317908
Scfd1	0.00799273	0.131582	0.56	0.463	0.0160425
Cdk5rap3	0.00681604	0.131521	0.482	0.36	0.0141864
Abhd8	0.00496929	0.131458	0.396	0.278	0.0110146
Arl5a	0.0052055	0.131422	0.421	0.307	0.0114257
Nt5c3b	0.00667848	0.131374	0.532	0.442	0.0139647
Sfswap	0.00565244	0.131367	0.459	0.374	0.0122459
Coq7	0.00974533	0.131361	0.594	0.486	0.0188514
Mob4	0.018987	0.13123	0.686	0.609	0.0320021
Asf1a	0.0109457	0.131222	0.554	0.467	0.0206996
Commd3	0.0779584	0.131163	0.798	0.765	0.0962539
Sar1b	0.00759913	0.131156	0.563	0.453	0.0154872
Trip12	0.00694638	0.131102	0.512	0.405	0.0143912
Gm13889	0.00878653	0.13105	0.268	0.259	0.0172921
Eif2s1	0.0409821	0.13105	0.714	0.654	0.0586724
Ctsd	0.0358413	0.130861	0.737	0.677	0.0528929
Glt8d1	0.006224	0.130808	0.544	0.447	0.013161
Tead1	0.0418948	0.130808	0.746	0.689	0.0596756
Rbmx	0.0133746	0.130768	0.563	0.459	0.0243715
Mpg	0.00679257	0.130719	0.516	0.442	0.0141507
Mex3b	0.00763014	0.130699	0.365	0.247	0.0155042
Tram1	0.0059987	0.130686	0.387	0.286	0.0128048
Hectd1	0.0315083	0.130642	0.751	0.665	0.0482151
Gnaq	0.0194022	0.130592	0.558	0.467	0.032583
Topors	0.0158563	0.130589	0.561	0.482	0.027832
Adh5	0.112005	0.13056	0.865	0.862	0.12893
Ajap1	0.135459	0.130505	0.202	0.089	0.151844
Ergic2	0.0301045	0.130468	0.674	0.617	0.0465627
Tmem39a	0.00915629	0.130362	0.338	0.233	0.0178993
Bckdk	0.00610312	0.130345	0.458	0.395	0.0129296
Gde1	0.00602401	0.130341	0.508	0.409	0.0128345
Rars	0.00947817	0.130333	0.55	0.49	0.0184325
Bzw1	0.117783	0.130286	0.911	0.879	0.134507
Ube2i	0.142036	0.130244	0.913	0.928	0.158232
Pdgfrb	0.0380106	0.130119	0.68	0.613	0.0553328
Gps1	0.0303075	0.130108	0.726	0.663	0.0467804
Srsf4	0.00528984	0.130042	0.481	0.377	0.0115658
Sms	0.0161471	0.129879	0.514	0.411	0.0282762
Dbnl	0.0107766	0.129809	0.599	0.486	0.0204627
Ifi27	0.0161814	0.129772	0.45	0.36	0.0283144
Hmox2	0.0275382	0.129741	0.715	0.658	0.0433982
Polr2f	0.065518	0.129739	0.837	0.747	0.084168
Usmg5	0.106543	0.129681	0.879	0.842	0.12419
Itfg1	0.00709422	0.129651	0.49	0.375	0.0146302
Snrpc	0.0709693	0.129608	0.837	0.809	0.0897377
Mrps12	0.0105674	0.129534	0.56	0.482	0.0201505
Wdr45b	0.0173358	0.129504	0.625	0.547	0.0298472
Snrpa	0.050645	0.129419	0.751	0.685	0.0687064
Ube2e1	0.0114771	0.129369	0.581	0.481	0.0215208
Plec	0.0133762	0.129327	0.35	0.261	0.0243715
Luc7l2	0.20648	0.12931	0.913	0.901	0.220585
Mfap5	0.352083	0.129303	0.304	0.255	0.363379
Drg1	0.00853547	0.129301	0.52	0.432	0.0169058
Hspa14	0.0057362	0.12925	0.502	0.379	0.0123854
Hoxa5	0.0455616	0.129232	0.27	0.163	0.0634145
Sec24d	0.00514253	0.129172	0.42	0.302	0.0112985
Bptf	0.0905757	0.129169	0.798	0.772	0.108556
Smc1a	0.152567	0.129153	0.831	0.825	0.168257
Smarca5	0.0956755	0.129123	0.794	0.737	0.11346
Bcat2	0.00675999	0.129094	0.362	0.255	0.0141089
Rpl4	0.272016	0.129016	0.996	1	0.285319
H2afj	0.0600312	0.129011	0.709	0.628	0.0782805
Eif3e	0.185668	0.128907	0.98	0.973	0.200347
Pgrmc1	0.0493423	0.128897	0.803	0.728	0.0675053
Itm2a	0.0365065	0.128819	0.362	0.27	0.0536286
Tsnax	0.00808368	0.128787	0.578	0.451	0.0161961
Ube2b	0.0474328	0.128745	0.751	0.673	0.0654126
Nsd1	0.0495475	0.128724	0.774	0.72	0.067707
Zmat5	0.00567719	0.128715	0.471	0.36	0.0122697
Rrm1	0.0239933	0.128709	0.303	0.208	0.0389007
Tmem119	0.00767643	0.128683	0.488	0.375	0.0155601
Wapl	0.0104598	0.128681	0.535	0.438	0.0199962
Ralbp1	0.0692321	0.128677	0.763	0.716	0.0880851
Mrpl21	0.0319488	0.128641	0.677	0.619	0.048614
Mtch2	0.0154035	0.128554	0.593	0.512	0.0272068
Trappc5	0.00635691	0.128553	0.486	0.407	0.0133913
Thbs1	0.0729581	0.128481	0.481	0.459	0.0914657
Gmps	0.0302711	0.128459	0.646	0.572	0.0467561
Sucla2	0.0110176	0.128382	0.562	0.488	0.0208151
Scamp3	0.00919893	0.12835	0.507	0.416	0.017967
Usp1	0.0262	0.128172	0.387	0.319	0.0418457
Gna11	0.0208563	0.128146	0.642	0.549	0.0345052
Atp5d	0.304998	0.128145	0.99	0.99	0.317988
Tsfm	0.00587721	0.128139	0.399	0.286	0.0126081
Stx16	0.0137365	0.128125	0.566	0.5	0.0249079
Hnrnpc	0.21153	0.128102	0.934	0.924	0.225339
Fam220a	0.00683346	0.128041	0.48	0.379	0.0141964
Naxd	0.0141251	0.128015	0.597	0.51	0.0253661
Csnk1a1	0.162104	0.127947	0.965	0.953	0.177557
Dld	0.0114709	0.127924	0.558	0.49	0.0215208
Hspd1	0.204499	0.127914	0.899	0.883	0.218572
Pmf1	0.017057	0.127907	0.325	0.226	0.0294123
Lima1	0.102978	0.12785	0.779	0.73	0.120738
Mrpl46	0.0055607	0.127796	0.421	0.3	0.0120876
Dnajc1	0.0250368	0.127745	0.637	0.576	0.0402161
Rps4x	0.459519	0.127716	1	1	0.46804
Trib2	0.0178384	0.127565	0.344	0.247	0.0305259
Eef1b2	0.58913	0.12754	0.996	1	0.595744
Runx1t1	0.0654791	0.127489	0.251	0.15	0.0841661
Grpel1	0.0389386	0.127483	0.708	0.634	0.0564648
Kifap3	0.0401355	0.127449	0.684	0.613	0.0576804
Ndrg2	0.0215181	0.12742	0.285	0.228	0.0354749
Gstm5	0.127625	0.127281	0.807	0.786	0.144211
Sptan1	0.0256997	0.127121	0.617	0.531	0.0411341
Oaz2	0.0180552	0.127113	0.63	0.523	0.0308266
Itm2c	0.0640534	0.127057	0.784	0.718	0.0827156
Plxnb2	0.0165567	0.127007	0.523	0.434	0.0287921
Eif3f	0.248428	0.126915	0.994	0.994	0.262042
Smo	0.0315306	0.12691	0.695	0.601	0.0482151
Zmiz1	0.0202116	0.126846	0.445	0.36	0.0337159
Myh10	0.515034	0.126814	0.851	0.825	0.522929
Grn	0.0320159	0.12677	0.653	0.588	0.0486832
Rtraf	0.264134	0.126712	0.975	0.969	0.277698
B230219D22Rik	0.0849169	0.126614	0.734	0.7	0.102979
Tyms	0.0339799	0.126391	0.325	0.224	0.050812
Snapin	0.00823652	0.126351	0.37	0.263	0.0164002
Tgfb1	0.014942	0.126314	0.374	0.27	0.0265584
Cyfip1	0.0331867	0.126228	0.641	0.588	0.049991
Eif2s3y	0.0387809	0.12622	0.289	0.173	0.0563304
Thumpd1	0.00839598	0.126199	0.408	0.311	0.0166588
Ube2h	0.0119263	0.126003	0.525	0.457	0.0221601
Supt4a	0.0587458	0.125983	0.786	0.687	0.0771852
Cdc42ep2	0.0134221	0.125905	0.508	0.432	0.0244354
Derl2	0.00724324	0.125852	0.402	0.302	0.0148805
Chtf8	0.00751859	0.125839	0.444	0.346	0.0153507
Echs1	0.0613907	0.125772	0.768	0.7	0.079776
Hoxc6	0.0421526	0.125699	0.563	0.494	0.059967
Pkn2	0.0390841	0.125571	0.702	0.63	0.056483
Fdft1	0.145651	0.125458	0.205	0.103	0.161421
Cgnl1	0.0320527	0.12533	0.47	0.407	0.0487063
Armcx3	0.0187611	0.125328	0.621	0.539	0.0317908
Prpf31	0.00933291	0.125309	0.455	0.364	0.0182129
Traf7	0.00968205	0.125297	0.419	0.325	0.0187642
Ginm1	0.0107474	0.125297	0.408	0.313	0.0204418
Mrpl17	0.0503528	0.125269	0.715	0.634	0.068475
Hoxd9	0.0376012	0.125215	0.529	0.457	0.0548077
Zfp945	0.0182768	0.125103	0.31	0.202	0.0311341
Mrpl28	0.0441406	0.125075	0.709	0.615	0.0619344
Ssu72	0.0440284	0.12505	0.704	0.625	0.061887
Taf1d	0.0840153	0.125	0.706	0.63	0.102216
Lsm3	0.0487627	0.124991	0.71	0.665	0.0669188
Ctbp1	0.0506806	0.124975	0.716	0.648	0.0687133
Cops5	0.0670679	0.124965	0.797	0.763	0.0857764
Tmem30a	0.0163871	0.124916	0.529	0.424	0.0286075
Cops9	0.0805513	0.124883	0.846	0.77	0.0988564
Rassf1	0.0175103	0.124853	0.537	0.453	0.0300557
Snap47	0.0228532	0.124723	0.609	0.49	0.0373208
Ostf1	0.0213923	0.124685	0.573	0.496	0.0352935
Dync1h1	0.0281618	0.1246	0.519	0.449	0.0441611
Dcun1d5	0.0594622	0.124594	0.757	0.677	0.0778117
2022-09-07	0.177264	0.12458	0.996	0.99	0.192478
Sf1	0.0109473	0.124526	0.468	0.364	0.0206996
Mrps34	0.0166751	0.124503	0.547	0.461	0.0289439
Rnase4	0.0118564	0.124496	0.346	0.228	0.0221032
Rae1	0.014735	0.124458	0.539	0.459	0.0262319
Mmp23	0.070464	0.124458	0.469	0.372	0.0891989
Copb1	0.0504953	0.124457	0.724	0.673	0.0685446
Eif3a	0.325723	0.124428	0.942	0.938	0.337875
1110008P14Rik	0.0108806	0.12431	0.371	0.284	0.0206429
Rpa2	0.0783744	0.124242	0.252	0.165	0.0965531
Wtap	0.0116591	0.124206	0.504	0.424	0.0218257
Mcm7	0.0504257	0.12415	0.414	0.329	0.0684914
Fip1l1	0.0585163	0.124095	0.742	0.658	0.0771087
Ccdc32	0.0151714	0.124052	0.333	0.232	0.02686
Vamp3	0.00997599	0.123993	0.498	0.414	0.0192181
Med29	0.0244046	0.123971	0.547	0.461	0.039369
Anapc4	0.0106693	0.123937	0.505	0.418	0.0203277
Naxe	0.0622358	0.123909	0.742	0.683	0.0805952
Ywhaz	0.144107	0.123835	0.838	0.802	0.159946
Glyr1	0.0192871	0.123806	0.599	0.512	0.032438
Gm16286	0.0364205	0.12373	0.663	0.601	0.0535371
Prrc2c	0.2326	0.123605	0.922	0.914	0.246502
Palld	0.877681	0.123598	0.61	0.535	0.878852
Csnk1e	0.0390243	0.123591	0.593	0.498	0.0564799
Ubap2l	0.111303	0.123584	0.788	0.774	0.12841
Rbm39	0.303001	0.123572	0.993	0.994	0.316053
Cuta	0.0426626	0.123495	0.699	0.64	0.0605395
Ctcf	0.0816817	0.123413	0.747	0.689	0.100014
Nr3c1	0.04937	0.123371	0.624	0.531	0.0675053
Plod3	0.0150252	0.123323	0.51	0.42	0.0266642
Lgi2	0.0436081	0.123295	0.439	0.381	0.0615322
Rps3a1	0.795997	0.123278	1	1	0.798835
Atf4	0.0534079	0.123267	0.65	0.58	0.0714219
Tmod3	0.105432	0.123264	0.801	0.708	0.123082
Pum1	0.0578749	0.123247	0.671	0.632	0.0764425
Bysl	0.0698687	0.12312	0.257	0.146	0.0886947
Lage3	0.0429583	0.12312	0.69	0.609	0.0608824
Shisa3	0.142996	0.123083	0.366	0.321	0.159026
Cox5a	0.307431	0.123014	0.931	0.914	0.320229
Nectin3	0.0176275	0.122965	0.496	0.426	0.0302339
Nol11	0.0125333	0.122963	0.462	0.375	0.0231164
Nub1	0.00869025	0.122937	0.44	0.339	0.017137
Ndufc1	0.226492	0.122884	0.914	0.893	0.240368
Fyttd1	0.0265676	0.122832	0.554	0.494	0.0421637
Rangap1	0.198204	0.122802	0.205	0.117	0.212348
Dclk1	0.169741	0.122794	0.326	0.284	0.184933
Chchd7	0.0159011	0.122662	0.518	0.424	0.0278671
Drap1	0.22831	0.122642	0.938	0.911	0.242183
Arid4a	0.0227312	0.122635	0.47	0.426	0.0371755
Ost4	0.119552	0.122589	0.853	0.798	0.13632
Xrn2	0.0592542	0.12257	0.718	0.654	0.0776719
Zmynd11	0.028853	0.122563	0.643	0.539	0.0449803
Apbb2	0.0174412	0.12255	0.514	0.43	0.0299828
Mob2	0.00946806	0.122488	0.406	0.284	0.0184288
Msn	0.0151102	0.122486	0.519	0.459	0.0267727
Atp5l	0.325909	0.122478	0.979	0.967	0.337913
0610012G03Rik	0.0981023	0.122453	0.82	0.761	0.115729
Cul7	0.0118467	0.122408	0.364	0.267	0.0221032
Adamts7	0.0227282	0.122339	0.304	0.208	0.0371755
Itgb5	0.0219028	0.122334	0.458	0.352	0.0360564
Iscu	0.0272151	0.12233	0.626	0.549	0.0430301
Bod1	0.0369477	0.122321	0.636	0.551	0.0541708
Cycs	0.0670747	0.122248	0.648	0.582	0.0857764
Map1b	0.10975	0.122202	0.223	0.165	0.126943
Wisp1	0.03549	0.122153	0.337	0.263	0.0525741
Rpl30	0.670538	0.122139	0.999	1	0.675034
Degs1	0.0232968	0.122083	0.598	0.512	0.0379626
Fez2	0.0120654	0.12204	0.479	0.387	0.0223717
Pja2	0.0500199	0.122029	0.68	0.562	0.0681925
Tanc1	0.0646234	0.122012	0.47	0.407	0.0832563
Ncln	0.011713	0.121985	0.362	0.251	0.0219083
Cped1	0.0514695	0.121972	0.447	0.374	0.0693756
Zfp106	0.0509631	0.121966	0.612	0.556	0.0689717
Ptges3	0.132253	0.121928	0.816	0.778	0.148579
Ube2a	0.0138288	0.121899	0.507	0.401	0.0250341
Mrps16	0.0971487	0.121835	0.792	0.732	0.114784
Spag7	0.0558369	0.121802	0.71	0.656	0.0741857
Tnrc6c	0.0621824	0.121791	0.679	0.621	0.0805724
Agpat2	0.0124643	0.121776	0.366	0.276	0.0230079
Dhx9	0.0473819	0.121752	0.574	0.523	0.0654126
Rpl19	0.858032	0.121665	1	1	0.859941
Exosc1	0.0254146	0.121661	0.314	0.189	0.0407358
U2af2	0.0364179	0.121624	0.582	0.516	0.0535371
Lrp1	0.129979	0.121584	0.764	0.689	0.146283
Clk4	0.0126724	0.121573	0.379	0.268	0.0232965
Cebpg	0.015479	0.121465	0.344	0.247	0.0273187
Git2	0.0201947	0.121414	0.409	0.304	0.0337128
Nktr	0.244236	0.121384	0.832	0.796	0.257983
Emc10	0.0914567	0.121312	0.776	0.71	0.109358
Rab7	0.0414882	0.121278	0.661	0.584	0.0592088
Ptpn2	0.0118516	0.121264	0.453	0.34	0.0221032
Rps9	0.798246	0.121258	1	1	0.800735
H13	0.0710256	0.121161	0.733	0.667	0.0897585
Utp11	0.0717954	0.121118	0.757	0.683	0.0905282
Wdr18	0.0189571	0.121026	0.476	0.389	0.0320021
Nptn	0.0183789	0.121023	0.548	0.43	0.0312844
Msrb2	0.0152793	0.121003	0.363	0.241	0.0270298
Cers4	0.0234362	0.121002	0.357	0.263	0.0381622
Prnp	0.0645667	0.120971	0.264	0.181	0.0832308
Scand1	0.208362	0.120843	0.927	0.891	0.222489
Ccdc25	0.0269389	0.120842	0.35	0.241	0.0426927
Tmem147	0.0470593	0.120796	0.631	0.586	0.0650968
Cpsf6	0.0366658	0.120603	0.604	0.551	0.0538275
Ndufs6	0.155001	0.12055	0.856	0.829	0.17044
Arid4b	0.0688961	0.120531	0.714	0.636	0.0877568
Ywhag	0.0208676	0.120515	0.39	0.302	0.0345052
Rpl7a	0.650923	0.120479	1	1	0.656462
Plin2	0.03246	0.120457	0.605	0.51	0.0491594
Baz1b	0.0600693	0.120446	0.623	0.553	0.0782847
Rtn3	0.0318842	0.120428	0.576	0.482	0.0485765
Snap23	0.0146979	0.120396	0.551	0.453	0.0261865
Leprot	0.0458844	0.120339	0.667	0.553	0.0637421
Eif3l	0.119455	0.120337	0.782	0.759	0.136278
Rad23b	0.0207861	0.120331	0.55	0.471	0.0344446
Rap1a	0.0902857	0.120312	0.773	0.71	0.108266
Tsc22d3	0.0210297	0.120248	0.541	0.449	0.0347206
P4ha3	0.114956	0.120211	0.233	0.13	0.131813
Gemin7	0.0368554	0.120196	0.629	0.529	0.0540707
Acads	0.0375867	0.120175	0.598	0.518	0.0548077
Ddx46	0.0722279	0.120041	0.675	0.626	0.0909207
Ipo9	0.017935	0.120035	0.354	0.255	0.0306679
Mrps18a	0.026231	0.120011	0.593	0.49	0.0418655
Zfp664	0.0138841	0.11999	0.464	0.358	0.0251141
Ppil1	0.0203627	0.119927	0.34	0.245	0.0339428
Pgls	0.308875	0.119879	0.924	0.912	0.321585
Zc3h13	0.152648	0.119875	0.748	0.693	0.168264
Pcbp4	0.0162409	0.119873	0.434	0.358	0.0283964
Slc38a2	0.442393	0.119842	0.876	0.875	0.451413
Mrpl55	0.0129019	0.119795	0.411	0.309	0.0236029
Fam193a	0.0234938	0.119776	0.471	0.397	0.0382007
Eif3i	0.333771	0.119763	0.951	0.924	0.345587
Vezf1	0.0217916	0.119759	0.517	0.428	0.0358996
Usf1	0.0144864	0.119752	0.382	0.267	0.0259122
Mrps33	0.12036	0.119752	0.81	0.745	0.137033
Rsrc2	0.242085	0.11969	0.879	0.885	0.255831
Rpl3	0.778068	0.119638	1	1	0.78119
As3mt	0.085999	0.119623	0.248	0.13	0.104123
Tenm3	0.0403393	0.119597	0.606	0.519	0.0578993
Ythdf2	0.0169911	0.119567	0.471	0.37	0.029321
Plagl1	0.25231	0.119537	0.659	0.582	0.266012
Colgalt1	0.0479192	0.119492	0.594	0.537	0.0659621
Pfdn5	0.489559	0.119491	0.993	0.994	0.498187
2410002F23Rik	0.0164991	0.119453	0.376	0.28	0.0287141
Gna14	0.091589	0.119392	0.258	0.167	0.109363
Banf1	0.224682	0.119362	0.844	0.796	0.238559
Lxn	0.0167659	0.119359	0.357	0.263	0.0290523
Acat1	0.0947354	0.119359	0.734	0.681	0.112523
Csde1	0.14675	0.119353	0.816	0.796	0.162406
Mtx1	0.0134459	0.119332	0.433	0.327	0.0244589
Cmc2	0.015893	0.119307	0.382	0.294	0.0278671
Ndufa12	0.186116	0.119304	0.865	0.848	0.200734
Anapc16	0.039239	0.119265	0.628	0.529	0.0566087
Emcn	0.0965675	0.119264	0.403	0.323	0.114277
Ergic3	0.172443	0.119257	0.833	0.8	0.187696
Cltc	0.0323104	0.119134	0.575	0.498	0.0490113
Gsk3b	0.142565	0.119125	0.772	0.735	0.158624
Tmem97	0.072152	0.119122	0.257	0.158	0.090876
Rab6a	0.0448095	0.119088	0.598	0.523	0.0625998
Txndc15	0.0353215	0.119077	0.642	0.558	0.0525043
Mdp1	0.0223349	0.119059	0.419	0.339	0.0365806
Gars	0.01552	0.119042	0.504	0.403	0.0273483
Nsrp1	0.0768194	0.119041	0.642	0.58	0.0952028
Ext2	0.0273931	0.119015	0.578	0.498	0.0432519
Mlf2	0.166691	0.118964	0.81	0.767	0.181874
Arl6ip4	0.0288286	0.118923	0.541	0.475	0.0449803
1110004F10Rik	0.271255	0.118917	0.93	0.924	0.284654
Rpl36al	0.0793074	0.11887	0.723	0.648	0.0975425
Nudt4	0.0303475	0.118766	0.513	0.44	0.04681
Chmp6	0.0168993	0.11876	0.471	0.389	0.0292299
Nxt1	0.0156745	0.118754	0.401	0.302	0.0275772
Gm7324	0.574065	0.118744	0.121	0.008	0.581031
Nsfl1c	0.0667969	0.118736	0.661	0.619	0.0856156
Ythdf1	0.0157015	0.118675	0.451	0.368	0.0276033
Reep3	0.0349555	0.11863	0.543	0.434	0.0520978
Nipbl	0.115044	0.118542	0.759	0.706	0.131847
Tmem121	0.128714	0.118525	0.242	0.16	0.145132
Rab1b	0.0219267	0.118518	0.453	0.37	0.0360694
Uqcrfs1	0.107521	0.118502	0.788	0.706	0.12481
2210016F16Rik	0.0136914	0.118491	0.427	0.311	0.0248653
Pycr2	0.0169453	0.118463	0.434	0.337	0.0292868
Zkscan3	0.0306619	0.118395	0.561	0.475	0.0471979
Eif3h	0.457591	0.118294	0.982	0.981	0.466498
Mrpl3	0.01645	0.118278	0.502	0.379	0.0286868
Tmpo	0.107151	0.118252	0.66	0.623	0.12452
Eprs	0.160133	0.118209	0.835	0.792	0.175484
Mmp11	0.023957	0.118092	0.407	0.327	0.0388698
Cers2	0.0241142	0.117986	0.561	0.453	0.0390123
Elovl1	0.0180731	0.117968	0.411	0.321	0.0308338
Acd	0.0221606	0.117893	0.334	0.243	0.0363843
Rexo2	0.108507	0.117866	0.628	0.593	0.125699
Col13a1	0.337522	0.117832	0.161	0.074	0.34899
Tomm40	0.067323	0.117711	0.617	0.56	0.0859962
Pdcd11	0.0195411	0.117692	0.479	0.389	0.0327774
Tmem109	0.0372713	0.117653	0.555	0.475	0.0545386
Smarcc1	0.239943	0.117626	0.746	0.681	0.253686
Szrd1	0.0149214	0.117597	0.406	0.3	0.0265427
H1fx	0.604098	0.11758	0.854	0.842	0.610058
Ndufb3	0.111855	0.117491	0.764	0.691	0.128914
Smc4	0.069482	0.11744	0.53	0.467	0.0882535
Ndufb4	0.201122	0.117399	0.87	0.852	0.215065
Mapkap1	0.0246055	0.117341	0.535	0.449	0.0396079
Pnisr	0.208548	0.117237	0.909	0.872	0.222583
Mapk1ip1l	0.0163239	0.117213	0.395	0.319	0.0285193
Ptrhd1	0.047545	0.117196	0.296	0.191	0.0655271
Atp2b1	0.712191	0.11719	0.87	0.874	0.716007
Mpc1	0.143892	0.117139	0.837	0.79	0.159943
Mfap1b	0.0341142	0.117049	0.298	0.183	0.0509788
Myh9	0.152786	0.117012	0.747	0.706	0.168333
Loxl1	0.0386719	0.11699	0.407	0.319	0.056233
Btf3	0.745294	0.116949	0.998	0.998	0.748952
Nagk	0.0309564	0.116915	0.547	0.465	0.0475862
Lig1	0.12779	0.116857	0.347	0.29	0.144252
Zfp148	0.0669302	0.11679	0.63	0.549	0.0857377
Ift81	0.0167709	0.116716	0.42	0.304	0.0290523
Eftud2	0.0204812	0.116716	0.411	0.331	0.0340397
Mettl16	0.023461	0.116716	0.406	0.331	0.0381749
Vps4a	0.0143441	0.11671	0.436	0.317	0.0256984
Prkar1a	0.209869	0.116673	0.885	0.858	0.223886
Atxn2	0.0264738	0.11663	0.451	0.37	0.0420741
Gkap1	0.0434429	0.11663	0.432	0.331	0.061376
Ei24	0.0587373	0.116605	0.667	0.603	0.0771852
Ddx24	0.140836	0.116584	0.739	0.704	0.157089
Triap1	0.0154911	0.116536	0.388	0.278	0.0273187
Aamp	0.270786	0.116536	0.878	0.864	0.284294
Ppdpf	0.193048	0.116523	0.84	0.786	0.207515
Cggbp1	0.0925052	0.11644	0.709	0.626	0.110281
mt-Nd5	0.299699	0.116439	0.992	0.99	0.312898
Myl12b	0.326445	0.116425	0.918	0.885	0.338313
Stx5a	0.0354767	0.116397	0.572	0.49	0.0525741
Cotl1	0.0595664	0.116346	0.55	0.49	0.0778998
Tsen34	0.184485	0.11634	0.832	0.8	0.199166
Thyn1	0.0297109	0.116334	0.492	0.411	0.0460805
2022-03-07	0.0452414	0.116326	0.579	0.521	0.0630741
Mbtps1	0.031164	0.116268	0.55	0.481	0.0478074
Rbm8a	0.179842	0.11625	0.81	0.805	0.194994
Tgm2	0.0592128	0.116245	0.295	0.235	0.0776629
Atad2	0.186724	0.116235	0.253	0.191	0.201232
Scaf11	0.176317	0.116215	0.751	0.718	0.191542
Cul4a	0.0206344	0.11619	0.391	0.319	0.0342689
Aggf1	0.0182141	0.116102	0.428	0.329	0.0310508
Fads3	0.213781	0.116073	0.202	0.113	0.227414
Lzts2	0.0678696	0.115981	0.699	0.621	0.0865472
Rpp25l	0.0402877	0.115932	0.585	0.521	0.0578622
Stx12	0.0281854	0.115931	0.549	0.449	0.0441611
Zwint	0.0557623	0.115915	0.603	0.556	0.0741611
Rps27l	0.438163	0.115906	0.944	0.949	0.447706
Pcbd2	0.0377395	0.115853	0.539	0.461	0.0549737
2022-03-05	0.0826603	0.115817	0.666	0.593	0.101004
Dnajc19	0.051303	0.115789	0.61	0.516	0.0693068
Arih1	0.0230976	0.115762	0.437	0.36	0.0376926
Arhgap31	0.0290029	0.115731	0.358	0.253	0.0451691
4921524J17Rik	0.024759	0.115704	0.475	0.387	0.0398266
Hspe1	0.400277	0.11561	0.973	0.963	0.410298
Cdk12	0.0432479	0.11554	0.536	0.446	0.0612157
Nol7	0.115763	0.115493	0.742	0.681	0.132402
Thoc3	0.0370343	0.115484	0.567	0.492	0.0542271
Actn4	0.12958	0.115436	0.797	0.768	0.145907
Stx8	0.0270126	0.115405	0.498	0.409	0.0427794
Eef2	0.962223	0.115377	0.994	1	0.963078
Akr1b3	0.0323187	0.115345	0.467	0.372	0.0490113
Ppil2	0.0263869	0.115319	0.517	0.418	0.0420249
Chordc1	0.0240507	0.115313	0.452	0.354	0.0389516
Cdk2ap2	0.0536202	0.115312	0.291	0.177	0.0716208
Ube2d1	0.0257629	0.115282	0.346	0.235	0.041206
Sat1	0.0674951	0.115259	0.493	0.434	0.0861673
BC031181	0.0475901	0.115252	0.617	0.525	0.0655492
Knop1	0.10258	0.115232	0.687	0.638	0.120443
Mapk8	0.0433589	0.115184	0.301	0.198	0.0613343
Fam92a	0.195765	0.115133	0.702	0.669	0.210336
Nufip2	0.0290869	0.115007	0.514	0.418	0.0452687
Aplp2	0.146282	0.114957	0.802	0.749	0.16204
Ubac1	0.027657	0.114895	0.381	0.305	0.0435246
Pam	0.0910299	0.114817	0.257	0.165	0.108984
Paics	0.127708	0.114767	0.727	0.681	0.144232
Smc3	0.284932	0.114702	0.859	0.804	0.298173
Ddx54	0.0263645	0.114624	0.502	0.414	0.0420249
Smu1	0.0437833	0.114582	0.586	0.484	0.0616636
Pdcl3	0.0888284	0.114567	0.703	0.638	0.106917
Supt16	0.13833	0.114548	0.687	0.636	0.15437
Glg1	0.124556	0.11452	0.68	0.593	0.14131
Prpf38b	0.165557	0.114519	0.696	0.644	0.180732
Gnai3	0.0912171	0.114479	0.674	0.597	0.10915
Nras	0.0223175	0.11438	0.436	0.319	0.0365785
Ebpl	0.0634986	0.114361	0.603	0.543	0.082136
Idh1	0.0467073	0.114349	0.308	0.183	0.0646496
Mogs	0.0210016	0.114306	0.414	0.304	0.0346997
Hsd17b12	0.028105	0.114302	0.436	0.337	0.0441062
Arhgdib	0.09174	0.114201	0.308	0.237	0.109485
Tada2a	0.110795	0.114201	0.257	0.165	0.127888
Tpd52l2	0.0702944	0.114164	0.679	0.584	0.0891345
Ankrd13a	0.050907	0.11411	0.296	0.185	0.0689371
Vmp1	0.048888	0.114052	0.584	0.486	0.067009
Gspt1	0.18723	0.113979	0.753	0.718	0.201549
Usp22	0.0329526	0.113865	0.463	0.397	0.0497381
Tmcc1	0.0240594	0.113838	0.422	0.325	0.0389516
Nes	0.041414	0.113796	0.397	0.276	0.0591492
Pcbp2	0.37055	0.113783	0.887	0.856	0.381388
Ndufv2	0.26195	0.113739	0.876	0.833	0.275531
Praf2	0.0245908	0.113719	0.399	0.278	0.0396079
Lgals9	0.0389695	0.113595	0.439	0.35	0.0564731
Rab11b	0.120934	0.113594	0.702	0.646	0.137617
Eif3d	0.210185	0.113587	0.81	0.778	0.224118
Ube2e2	0.0400401	0.11355	0.52	0.442	0.05758
Sys1	0.158066	0.113515	0.797	0.739	0.173556
Top2b	0.264752	0.113433	0.796	0.714	0.278218
Rab5c	0.0795916	0.113429	0.662	0.582	0.0977852
Arpc1a	0.233392	0.113396	0.847	0.846	0.247224
Brd4	0.0910004	0.113333	0.65	0.576	0.108984
Fzr1	0.0302005	0.113308	0.337	0.243	0.0466791
Pole4	0.0594644	0.113301	0.56	0.49	0.0778117
Qsox1	0.13416	0.113299	0.236	0.13	0.150462
Vps28	0.0757574	0.113259	0.634	0.576	0.0943616
Sec22a	0.0962883	0.113221	0.252	0.154	0.114007
Wnt5a	0.0645589	0.113136	0.402	0.356	0.0832308
Capn2	0.0679362	0.113136	0.628	0.562	0.0865831
Golim4	0.0915744	0.113011	0.662	0.584	0.109363
N4bp2	0.0501765	0.112976	0.314	0.198	0.068359
Atp2a2	0.0334479	0.112925	0.462	0.375	0.0502499
Ctps	0.0243732	0.112864	0.376	0.259	0.0393465
Zfp451	0.0256819	0.112805	0.396	0.307	0.0411341
Imp3	0.170434	0.112735	0.822	0.751	0.185598
Akr7a5	0.0521098	0.112725	0.591	0.529	0.07004
Afap1l2	0.0173491	0.112708	0.391	0.288	0.0298474
Mxra8	0.123432	0.112693	0.656	0.574	0.140215
Chd1	0.0434783	0.112651	0.487	0.405	0.0613875
Zcchc3	0.052193	0.112644	0.563	0.486	0.0700886
Tcea1	0.158538	0.112562	0.705	0.648	0.17399
Mid1ip1	0.0363622	0.112518	0.366	0.288	0.0535213
B3gat3	0.0275879	0.112506	0.421	0.331	0.043446
Glipr2	0.183732	0.112504	0.711	0.665	0.198639
Npc2	0.396412	0.112401	0.942	0.916	0.407077
Nfyc	0.0487985	0.112333	0.308	0.212	0.066927
Ramp3	0.429815	0.112333	0.146	0.053	0.439774
Midn	0.0288617	0.112325	0.426	0.339	0.0449803
9930021J03Rik	0.0428691	0.112303	0.48	0.414	0.0607943
Mrps36	0.0499359	0.1123	0.611	0.502	0.0681549
Ubac2	0.0227545	0.112299	0.42	0.317	0.0371865
Samd4b	0.0571264	0.112263	0.346	0.265	0.0756312
Sh3pxd2a	0.0310902	0.112162	0.379	0.278	0.0477268
Tbc1d24	0.0563186	0.111979	0.307	0.21	0.0747375
Col11a1	0.0586985	0.11193	0.304	0.226	0.0771852
Arpc3	0.299656	0.111906	0.909	0.881	0.312898
Nsdhl	0.259089	0.111868	0.195	0.113	0.272648
Fus	0.458046	0.111867	0.967	0.961	0.466751
Selenot	0.0310088	0.111801	0.405	0.329	0.0476343
Cux1	0.146777	0.111798	0.679	0.613	0.162406
Hivep2	0.039778	0.111787	0.338	0.241	0.0573129
Hdac3	0.0375431	0.111782	0.507	0.44	0.054794
Cct4	0.441466	0.111723	0.939	0.926	0.450671
Ddx52	0.0299275	0.111707	0.405	0.309	0.0463526
Oser1	0.0280737	0.111635	0.471	0.37	0.0440879
Tug1	0.0306239	0.111635	0.445	0.344	0.0471804
Thoc7	0.282092	0.111539	0.87	0.821	0.295338
Sdhb	0.365863	0.111453	0.84	0.79	0.376909
Eef1d	0.654758	0.111437	0.973	0.963	0.659679
Tbca	0.460972	0.111422	0.938	0.918	0.469308
Brd1	0.0869175	0.111365	0.593	0.521	0.105066
Srek1ip1	0.0997149	0.11135	0.619	0.551	0.117324
Tor1aip2	0.0464387	0.111337	0.316	0.235	0.0643172
Rgs3	0.0480628	0.111281	0.314	0.218	0.0661194
Skp1a	0.222772	0.111234	0.772	0.735	0.236643
Mageh1	0.0530025	0.111234	0.525	0.442	0.0709219
Akt1s1	0.0693688	0.111209	0.592	0.514	0.0881745
Dlat	0.0325107	0.111207	0.357	0.241	0.0491759
Appbp2	0.0462081	0.111191	0.554	0.467	0.0640768
Nudt21	0.187336	0.111167	0.722	0.663	0.201568
Cdk13	0.0321308	0.111165	0.457	0.368	0.0487921
Slc39a13	0.0390668	0.111095	0.331	0.222	0.056483
St3gal5	0.182278	0.111095	0.223	0.119	0.197256
Sh3glb1	0.319098	0.111052	0.902	0.872	0.331615
Prr5	0.0279553	0.110936	0.407	0.315	0.0439325
Haus7	0.0354479	0.110914	0.332	0.247	0.0525741
Brd2	0.0809359	0.110782	0.558	0.486	0.0992203
Kcnb2	0.214922	0.110762	0.222	0.14	0.228519
Mrc2	0.0568396	0.110736	0.316	0.224	0.07534
Emd	0.0669894	0.110696	0.572	0.537	0.0857647
CT025619.1	0.110236	0.110584	0.283	0.222	0.127413
Glod4	0.0602358	0.110569	0.621	0.506	0.0784563
Sf3b3	0.104045	0.110534	0.644	0.566	0.121782
Numa1	0.0356787	0.11049	0.442	0.368	0.0527148
Hikeshi	0.0705383	0.110462	0.595	0.521	0.0892429
Hat1	0.0414202	0.110396	0.445	0.35	0.0591492
Triobp	0.0334262	0.11038	0.43	0.366	0.0502499
Plekhj1	0.0827576	0.110353	0.622	0.56	0.101014
Akap13	0.0405704	0.110342	0.449	0.374	0.0581569
Fam212a	0.0847395	0.110308	0.545	0.479	0.102875
Parl	0.0318435	0.110304	0.399	0.313	0.0485521
Timm13	0.377123	0.110291	0.897	0.856	0.387977
Hoxc8	0.138213	0.110274	0.456	0.432	0.154316
Rpl34	0.428516	0.110265	1	1	0.438645
Ech1	0.255486	0.110264	0.832	0.767	0.269234
Farp1	0.034568	0.110263	0.374	0.298	0.0516227
Camk1	0.132507	0.110221	0.708	0.64	0.148757
Lyar	0.0767221	0.110172	0.582	0.512	0.0951945
Nifk	0.0314943	0.110157	0.45	0.366	0.0482151
Gnb4	0.137019	0.110053	0.637	0.543	0.153135
Aff3	0.0752738	0.109993	0.335	0.235	0.093863
Ddx1	0.238612	0.109935	0.792	0.751	0.252397
Ccdc124	0.100752	0.109907	0.612	0.578	0.118482
Thbs2	0.163577	0.109894	0.508	0.453	0.178823
Abcf1	0.186756	0.109891	0.767	0.71	0.201232
Rnf2	0.0272198	0.109862	0.445	0.327	0.0430301
Fhl1	0.107574	0.109862	0.208	0.169	0.12481
Unc50	0.0407848	0.109829	0.535	0.449	0.0584271
Vezt	0.057087	0.109819	0.311	0.204	0.0756235
Rpap3	0.0338575	0.109782	0.358	0.263	0.0506846
Mprip	0.312317	0.109764	0.816	0.807	0.325017
Dlc1	0.307333	0.109727	0.847	0.831	0.320229
Rbm22	0.0502823	0.1097	0.523	0.432	0.0684617
Arfgef1	0.0313719	0.109672	0.395	0.319	0.0480935
Med25	0.0338723	0.109672	0.416	0.309	0.0506846
Grb2	0.0555981	0.109667	0.561	0.496	0.0740431
Nrd1	0.0827052	0.10958	0.592	0.514	0.101004
Ddr2	0.0725479	0.10956	0.526	0.461	0.0911707
Chmp3	0.070349	0.109518	0.621	0.527	0.0891535
Clta	0.635873	0.109496	0.977	0.969	0.641858
Srp68	0.0422264	0.109485	0.489	0.393	0.060034
Srp54a	0.120046	0.109457	0.259	0.158	0.136813
Rad23a	0.0927152	0.109443	0.285	0.185	0.110473
Txndc9	0.174939	0.109425	0.735	0.714	0.190136
Wdr43	0.0762305	0.109422	0.57	0.506	0.0946889
Mitd1	0.0514772	0.109416	0.329	0.237	0.0693756
Epn1	0.0600129	0.1094	0.531	0.449	0.0782805
B3gnt9	0.0768354	0.10936	0.278	0.187	0.0952028
Gar1	0.0436874	0.109359	0.457	0.397	0.0615852
Dctn4	0.0953391	0.109351	0.631	0.576	0.113181
Cep350	0.038796	0.109325	0.382	0.304	0.0563304
Clint1	0.0443892	0.109294	0.476	0.407	0.0621682
Pitpnb	0.0411508	0.109284	0.555	0.44	0.0588437
Adora2b	0.256146	0.109217	0.192	0.086	0.269678
Tmem126a	0.0620222	0.109207	0.578	0.494	0.080411
Tex261	0.0518552	0.10916	0.55	0.467	0.0698015
Commd1	0.291172	0.109141	0.853	0.802	0.304279
Flii	0.032847	0.10911	0.43	0.329	0.049612
Magohb	0.0374933	0.109109	0.425	0.354	0.0547568
Supt20	0.0471107	0.109104	0.506	0.434	0.0651279
Tmem5	0.11027	0.109092	0.646	0.584	0.127413
Kdm1a	0.123467	0.109042	0.673	0.621	0.140215
Tmem59	0.431901	0.108989	0.931	0.897	0.441708
Dkc1	0.041154	0.108919	0.494	0.405	0.0588437
C1qtnf6	0.0399078	0.108902	0.401	0.313	0.0574632
Tnrc18	0.0760781	0.108866	0.536	0.455	0.0945518
Eef1akmt1	0.0445417	0.108789	0.467	0.403	0.062303
Nfat5	0.335346	0.108766	0.629	0.632	0.346899
Smim10l1	0.0861729	0.108757	0.699	0.611	0.104222
Nhs	0.132283	0.108722	0.261	0.167	0.148579
Zfp507	0.084281	0.108716	0.272	0.173	0.102484
Klf7	0.0463671	0.108677	0.35	0.239	0.0642577
Dapk3	0.045289	0.108667	0.489	0.409	0.0630741
Hadhb	0.0737258	0.108607	0.603	0.521	0.092188
Rpl31	0.974166	0.10859	0.995	0.998	0.974166
Borcs8	0.0484486	0.108568	0.418	0.348	0.0665281
Ube2e3	0.351571	0.108551	0.842	0.819	0.363016
Ebna1bp2	0.0726804	0.108544	0.579	0.496	0.0912353
Arhgef1	0.0397381	0.108534	0.479	0.403	0.057292
Jam3	0.0484231	0.108497	0.53	0.446	0.0665281
Commd9	0.0361533	0.108432	0.446	0.34	0.0532835
Trappc3	0.0893939	0.108404	0.624	0.525	0.107428
Gata6	0.111939	0.108399	0.601	0.525	0.12893
Emc7	0.0893963	0.108396	0.619	0.545	0.107428
Gatad1	0.0834982	0.108362	0.615	0.541	0.101697
Cbfb	0.0986712	0.108325	0.279	0.204	0.116339
Nr2f6	0.137654	0.108307	0.662	0.556	0.153769
Zfp318	0.0456942	0.108296	0.415	0.319	0.0635206
Neo1	0.089607	0.108265	0.297	0.212	0.107567
P3h4	0.115385	0.108089	0.64	0.582	0.132171
Eif6	0.153858	0.108083	0.709	0.667	0.169349
Ccny	0.0388294	0.108079	0.49	0.379	0.0563427
Pdxdc1	0.0444148	0.108007	0.45	0.379	0.0621682
Ppp4c	0.0553267	0.107964	0.469	0.393	0.0737253
Pfdn2	0.233863	0.107866	0.766	0.726	0.247607
Rab24	0.0771892	0.107794	0.517	0.457	0.0955208
Cdca7	0.117494	0.107743	0.433	0.346	0.134244
Irf3	0.0416078	0.107726	0.364	0.278	0.0593419
Gamt	0.0619742	0.107726	0.505	0.438	0.0803951
Nup62	0.0874678	0.107703	0.296	0.208	0.105561
Yae1d1	0.0460565	0.107688	0.484	0.379	0.0639059
Ybx3	0.399374	0.107672	0.773	0.747	0.409803
Rit1	0.036086	0.107628	0.446	0.362	0.0532192
Golm1	0.14696	0.107516	0.26	0.179	0.162472
Srm	0.275916	0.107456	0.494	0.459	0.289275
Pin4	0.103596	0.10736	0.617	0.539	0.12132
Acot9	0.0337263	0.107354	0.43	0.337	0.050567
Ccm2	0.0355923	0.107348	0.452	0.381	0.0526635
Pafah1b3	0.334673	0.107307	0.851	0.821	0.346362
Actl6a	0.0808088	0.107303	0.551	0.492	0.0991185
Pias2	0.0586957	0.107221	0.31	0.202	0.0771852
Trpc4ap	0.0448777	0.107215	0.476	0.389	0.0626563
Kmt2e	0.332188	0.107158	0.801	0.751	0.344107
Fhod1	0.0745917	0.107157	0.305	0.2	0.0931392
Hspa12b	0.0757304	0.107157	0.298	0.196	0.0943616
Scarf2	0.0766084	0.107045	0.541	0.457	0.0951059
Atg5	0.0425157	0.107011	0.378	0.28	0.0603691
Pin1	0.142446	0.106957	0.702	0.63	0.15857
Tpt1	0.817929	0.106913	1	1	0.820114
Ppan	0.06196	0.106885	0.322	0.239	0.0803951
Sirt2	0.0748427	0.106844	0.58	0.496	0.0933772
Lsm5	0.113108	0.106728	0.574	0.508	0.129958
Polr2l	0.127191	0.106693	0.267	0.173	0.143792
Rhoq	0.0473913	0.10668	0.449	0.372	0.0654126
Lats2	0.0441112	0.106642	0.396	0.311	0.0619317
Thap11	0.0390158	0.10661	0.445	0.344	0.0564799
Serpinb6b	0.131929	0.106596	0.248	0.169	0.148385
Sox11	0.183424	0.106555	0.253	0.2	0.198401
Sdhd	0.0781424	0.106539	0.568	0.488	0.0963402
[truncated: 255 more rows]

## Sheet: Cluster1_MutVsCTRL.DEGs
Gene	p_val	avg_logFC	pct.1	pct.2	p_val_adj
Gm10260	5.43e-91	1.50482	0.531	0.032	4.75e-88
Hist1h2ap	2.77e-14	0.722822	0.926	0.752	9e-13
Pttg1	3.26e-41	0.67342	0.742	0.561	6.35e-39
Tpm3-rs7	6.62e-67	0.636112	0.663	0.126	2.32e-64
Eif3j1	2.92e-41	0.516405	0.837	0.57	6.35e-39
Uba52	8.67e-80	0.488587	0.992	0.959	3.8e-77
Foxd1	2.21e-08	0.424181	0.623	0.524	2.91e-07
Hist1h2ae	1.87e-05	0.42153	0.758	0.66	9.63e-05
Basp1	8.21e-22	0.418447	0.982	0.968	6.85e-20
Fdps	4.56e-13	0.410818	0.527	0.371	1.33e-11
Erh	1.24e-35	0.373342	0.981	0.944	1.82e-33
Pdia6	1.69e-30	0.362859	0.99	0.981	2.12e-28
Ciapin1	6.07e-21	0.355249	0.748	0.541	4.62e-19
Rbp1	6.62e-20	0.351889	0.986	0.964	4.3e-18
Rps2	5.17e-84	0.33803	0.999	0.998	3.02e-81
Gm10076	1.67e-25	0.33187	0.96	0.893	1.72e-23
Apoe	4.83e-12	0.331795	0.541	0.376	1.28e-10
Hspa8	1.01e-34	0.331776	0.999	1	1.36e-32
Fn1	4.09e-10	0.331343	0.929	0.833	7.7e-09
Dcn	NA	0.32545	0.526	0.422	NA
Hist1h2ab	6.77e-08	0.320593	0.475	0.35	7.75e-07
Irak1bp1	2.3e-17	0.320046	0.568	0.316	1.12e-15
Cdkn1c	5.51e-10	0.319395	0.99	0.976	1.03e-08
Col1a1	1.67e-10	0.317606	0.97	0.978	3.57e-09
Myl9	3.2e-09	0.308783	0.882	0.818	4.97e-08
Gstp1	9.95e-17	0.308141	0.717	0.512	4.25e-15
Hmgcs1	3.67e-10	0.307916	0.548	0.396	7.07e-09
Fam32a	3.62e-16	0.305817	0.836	0.66	1.44e-14
Gm7324	2.46e-07	0.305124	0.313	0.017	2.4e-06
Pebp1	3.09e-39	0.30512	0.995	0.993	5.42e-37
Hspa5	1.3e-11	0.302404	0.983	0.981	3.26e-10
Eif5	1.41e-14	0.301713	0.953	0.91	4.84e-13
Nnat	1.46e-07	0.300684	0.333	0.182	1.52e-06
Calr	3.61e-16	0.300636	0.991	0.983	1.44e-14
Wdfy1	1.66e-14	0.298676	0.444	0.201	5.59e-13
Sparcl1	3.6e-07	0.298152	0.707	0.585	3.29e-06
Isyna1	6.64e-11	0.294048	0.82	0.726	1.53e-09
Srsf2	2.25e-19	0.290146	0.99	0.978	1.41e-17
Cox5b	4.48e-25	0.289446	0.991	0.976	4.36e-23
Il11ra1	2.1e-10	0.289395	0.753	0.609	4.29e-09
Alcam	3.6e-07	0.284251	0.937	0.871	3.29e-06
Actg1	4.34e-19	0.28425	1	1	2.62e-17
Tyms	1.93e-07	0.28185	0.899	0.803	1.92e-06
Pkdcc	6.62e-08	0.281705	0.933	0.864	7.63e-07
Mest	7.98e-08	0.278433	0.983	0.973	8.9e-07
Plk1	4.61e-05	0.275843	0.549	0.454	0.000203111
Igfbp4	2.57e-13	0.274711	0.975	0.964	7.9e-12
Acta2	8.8e-05	0.273598	0.863	0.765	0.000354613
Cnn2	7.53e-09	0.271365	0.946	0.917	1.07e-07
Nr2f1	8.39e-10	0.266806	0.636	0.478	1.52e-08
Tmsb10	2.41e-20	0.265373	1	1	1.76e-18
Dnaja1	5.93e-14	0.264897	0.995	0.985	1.89e-12
Hsp90b1	1.68e-07	0.261075	0.988	0.99	1.71e-06
Maged1	9.1e-16	0.260131	0.983	0.954	3.47e-14
Vcp	2.17e-16	0.258907	0.988	0.968	9.05e-15
Mns1	3.77e-10	0.258457	0.497	0.291	7.19e-09
Sfr1	3.08e-15	0.258424	0.99	0.949	1.1e-13
Arf5	3.21e-18	0.256662	0.987	0.99	1.81e-16
Aldh1a2	0.00122031	0.25643	0.804	0.777	0.00309853
Sae1	2.72e-12	0.254256	0.963	0.913	7.57e-11
Tuba1a	2.73e-05	0.253778	0.978	0.959	0.00013086
Sfrp1	1.01e-05	0.253767	0.903	0.869	5.79e-05
Sqle	1.62e-06	0.252246	0.333	0.177	1.17e-05
Tpm1	6.15e-07	0.251644	0.908	0.876	5.15e-06
Manf	7.72e-09	0.250271	0.937	0.888	1.09e-07
Atp5k	3.65e-20	0.24887	1	0.983	2.56e-18
Ahsa1	7.39e-11	0.248462	0.854	0.779	1.68e-09
Pdgfra	1e-06	0.247196	0.851	0.772	7.81e-06
Snrpg	1.33e-15	0.246446	0.981	0.944	4.86e-14
Cfl2	3.48e-11	0.244367	0.919	0.833	8.36e-10
Tgfb1i1	3.42e-07	0.243527	0.727	0.604	3.17e-06
Gadd45gip1	3.16e-10	0.24298	0.773	0.658	6.3e-09
Ywhah	1.97e-10	0.24153	0.956	0.932	4.06e-09
Adrm1	6.46e-10	0.240401	0.783	0.67	1.19e-08
Raly	3.31e-12	0.239993	0.988	0.954	8.91e-11
Hoxc10	3.02e-08	0.239594	0.848	0.733	3.85e-07
Hmgn2	1.27e-09	0.239016	0.999	0.998	2.21e-08
Serpinh1	1.07e-15	0.23898	0.992	0.988	3.97e-14
Marcksl1	1.16e-12	0.238578	0.979	0.961	3.33e-11
Smoc2	0.0391238	0.238372	0.171	0.107	0.0446837
Prdx1	4.81e-15	0.238184	0.996	0.993	1.69e-13
Usp50	3.65e-10	0.237918	0.57	0.347	7.07e-09
Eif5a	5.07e-11	0.237698	0.995	0.993	1.18e-09
Selenos	3.84e-07	0.233921	0.786	0.714	3.49e-06
Clmp	1.57e-07	0.233621	0.695	0.573	1.61e-06
Arap1	5.28e-08	0.233511	0.665	0.515	6.3e-07
Maged2	2.13e-09	0.232762	0.99	0.99	3.53e-08
Srsf3	3.51e-13	0.23238	0.999	0.995	1.04e-11
Cdc20	0.0229976	0.231512	0.655	0.587	0.0292227
Phb	1.5e-09	0.23089	0.814	0.675	2.55e-08
Anxa2	3.97e-09	0.229634	0.999	0.978	6.05e-08
Ube2m	3.34e-11	0.229608	0.948	0.91	8.13e-10
Slc25a5	7.7e-06	0.22912	0.953	0.947	4.64e-05
Psmd1	3.07e-09	0.228891	0.877	0.801	4.85e-08
Anxa6	1e-08	0.228417	0.902	0.828	1.37e-07
Ybx1	3.8e-20	0.228165	1	0.998	2.56e-18
Eif2s3y	3.66e-06	0.228015	0.36	0.194	2.4e-05
Cdk4	1.83e-17	0.227277	0.99	0.993	9.43e-16
Nasp	4.35e-07	0.226194	0.972	0.966	3.85e-06
Rpl35	8.93e-46	0.226103	1	1	2.23e-43
Sec61g	7.69e-17	0.225717	0.999	0.998	3.55e-15
Ppp1r14b	3.88e-07	0.225022	0.984	0.968	3.5e-06
Psmd7	3.42e-10	0.224969	0.968	0.954	6.74e-09
Oaz1	1.62e-21	0.224321	0.999	1	1.29e-19
Psmc5	1.16e-09	0.224291	0.95	0.91	2.05e-08
Ap1s1	3e-09	0.224154	0.842	0.709	4.77e-08
Rpn2	2.68e-09	0.22304	0.925	0.879	4.31e-08
Nme1	6.62e-09	0.222826	0.987	0.973	9.63e-08
Tipin	2.17e-06	0.222709	0.813	0.728	1.52e-05
Uqcrc1	7.42e-09	0.22264	0.926	0.908	1.07e-07
Ccdc85b	2.17e-08	0.222456	0.557	0.403	2.88e-07
Hdac1	3.95e-09	0.221959	0.87	0.779	6.05e-08
Peg3	0.00016829	0.221813	0.921	0.883	0.000600499
Sap18	4.19e-09	0.220905	0.907	0.852	6.32e-08
Fkbp1a	2.25e-09	0.220902	0.986	0.978	3.69e-08
Cfl1	9.53e-17	0.220101	1	0.998	4.17e-15
Odc1	2.23e-06	0.21991	0.871	0.811	1.55e-05
Ppp2r2d	3.51e-08	0.219493	0.678	0.568	4.34e-07
Sox4	1.15e-06	0.21915	0.96	0.93	8.7e-06
Timm17a	8.34e-09	0.219091	0.831	0.731	1.15e-07
Calm1	6.56e-10	0.219002	1	1	1.2e-08
Hnrnpa3	3.03e-08	0.218188	0.999	0.995	3.85e-07
Dbi	6.65e-09	0.218124	0.975	0.959	9.63e-08
Tubb6	6.97e-05	0.217632	0.813	0.701	0.000290084
Romo1	1.71e-10	0.217405	0.966	0.939	3.62e-09
H2afy	1.24e-10	0.216139	0.983	0.966	2.75e-09
Dnm3os	3.19e-05	0.215405	0.659	0.558	0.000148857
Stmn1	1.17e-06	0.214877	1	0.993	8.79e-06
Ptch1	1.11e-05	0.214149	0.456	0.359	6.2e-05
Pdia4	3.37e-07	0.213318	0.876	0.808	3.14e-06
Ilf2	2.67e-08	0.213236	0.95	0.888	3.49e-07
Psmb6	1.59e-10	0.213042	0.99	0.985	3.43e-09
Lrrc59	1.61e-06	0.212858	0.789	0.701	1.16e-05
Trir	1.19e-08	0.212769	0.948	0.913	1.6e-07
Fbxl7	4.85e-05	0.212706	0.727	0.663	0.00021171
Aurka	0.0059044	0.212539	0.491	0.432	0.0104596
Col26a1	7.63e-08	0.212519	0.554	0.41	8.63e-07
Ybx3	3.79e-06	0.21226	0.928	0.886	2.47e-05
Arl6ip4	8.17e-08	0.211976	0.779	0.626	9.06e-07
Mfap2	1.09e-06	0.211902	0.95	0.934	8.32e-06
Rraga	9.89e-08	0.211811	0.801	0.672	1.09e-06
Kpna2	0.00590132	0.211579	0.459	0.364	0.0104596
Hsp90aa1	1.54e-10	0.211385	0.999	0.993	3.37e-09
Crabp2	0.00568508	0.211019	0.27	0.16	0.0102195
Ywhaq	1.07e-11	0.210872	0.994	0.971	2.72e-10
Cenpe	0.0471972	0.210783	0.72	0.682	0.0522359
Ptma	7e-18	0.210442	1	1	3.71e-16
Pomp	2.59e-09	0.210339	0.977	0.937	4.2e-08
Igfbp6	0.0373564	0.210004	0.183	0.114	0.0430015
Fkbp10	1.93e-07	0.209866	0.774	0.667	1.92e-06
Dlk1	0.00485837	0.209409	0.536	0.415	0.00913155
Col1a2	2.41e-05	0.209243	0.984	0.983	0.000117646
Cox7c	4.27e-16	0.208947	0.999	0.998	1.66e-14
Cyp51	3.01e-05	0.208725	0.386	0.289	0.000142685
Sfpq	8.26e-06	0.208705	0.969	0.966	4.92e-05
Eif4a3	3.37e-08	0.208512	0.92	0.864	4.21e-07
Dnajc3	2e-06	0.208232	0.815	0.731	1.43e-05
Ostc	1.39e-08	0.207698	0.978	0.964	1.86e-07
Arpc1b	2.11e-06	0.207505	0.965	0.944	1.49e-05
Pold2	1.26e-07	0.2069	0.734	0.595	1.34e-06
Wdr83os	5.63e-08	0.20681	0.871	0.786	6.57e-07
Trim35	5.68e-07	0.206638	0.855	0.752	4.85e-06
Mpp6	7.02e-07	0.20652	0.91	0.854	5.78e-06
Itga9	3.3e-06	0.205607	0.796	0.697	2.19e-05
Lmnb1	7.97e-05	0.205437	0.99	0.971	0.000325689
Tmed9	3.25e-08	0.20495	0.965	0.964	4.1e-07
C1qtnf2	9.16e-05	0.204556	0.351	0.25	0.000362887
Hoxd11	2.02e-05	0.204137	0.886	0.84	0.000102379
Atp5a1	2.72e-13	0.203718	0.996	0.995	8.22e-12
Eif1	8.05e-17	0.203692	0.999	0.998	3.62e-15
Echs1	2.48e-07	0.20257	0.885	0.828	2.4e-06
Selenow	2.5e-12	0.202221	0.999	0.985	7.07e-11
Dcakd	3.59e-07	0.202115	0.822	0.728	3.29e-06
4933404O12Rik	0.00509279	0.201185	0.253	0.068	0.00943359
Gtf3c6	4.75e-06	0.201174	0.805	0.738	3.02e-05
Ndufa4	1.02e-10	0.201067	0.999	0.993	2.28e-09
Sar1a	1.28e-06	0.199845	0.867	0.774	9.55e-06
Cyc1	1.23e-07	0.19972	0.951	0.9	1.33e-06
Tubb2a	3.18e-05	0.19957	0.494	0.359	0.000148706
Polr2m	3.13e-07	0.198982	0.988	0.971	2.96e-06
Set	2.69e-07	0.198768	0.999	0.998	2.59e-06
Rps21	1.18e-38	0.198597	1	1	1.87e-36
mt-Cytb	1.79e-10	0.198463	0.994	0.998	3.74e-09
Akirin1	4.65e-07	0.198442	0.466	0.294	4.03e-06
Kdelr2	1.07e-06	0.198304	0.901	0.828	8.24e-06
Sec61b	1.86e-07	0.1983	0.986	0.988	1.87e-06
Meg3	0.00459073	0.198211	0.835	0.75	0.0086857
Ppia	1.03e-25	0.197539	1	1	1.13e-23
Rcn3	4.07e-07	0.197514	0.964	0.927	3.65e-06
Thy1	0.0107541	0.197456	0.226	0.09	0.0162145
Prdx6	6e-06	0.197346	0.926	0.886	3.72e-05
Ewsr1	5.48e-07	0.197213	0.96	0.905	4.71e-06
Uqcrq	2.95e-07	0.197001	0.955	0.925	2.83e-06
Vdac3	7.77e-08	0.196992	0.969	0.947	8.73e-07
Slirp	4.42e-07	0.196952	0.853	0.76	3.89e-06
Rpl27	1.87e-09	0.196714	0.987	0.964	3.13e-08
Nhp2	2.23e-05	0.196695	0.849	0.762	0.000110313
Snrpa1	9.75e-07	0.196558	0.941	0.883	7.63e-06
Mtch1	1.53e-07	0.196077	0.966	0.956	1.57e-06
Ptpn1	8.82e-07	0.195965	0.66	0.544	7.03e-06
Ptbp1	7.71e-07	0.195698	0.891	0.84	6.26e-06
Ran	1.27e-09	0.19552	0.999	1	2.21e-08
Arl3	1.14e-06	0.195269	0.857	0.76	8.7e-06
Txndc5	7.3e-07	0.195225	0.876	0.789	5.98e-06
Arhgdib	4.92e-05	0.195076	0.42	0.289	0.000214351
Srrt	8.34e-06	0.19482	0.767	0.665	4.94e-05
Blmh	1.44e-06	0.194465	0.888	0.83	1.05e-05
Ccne1	0.000175536	0.19421	0.606	0.422	0.00062129
Srm	0.000258137	0.194035	0.738	0.646	0.000856544
Pwp1	9.29e-07	0.193285	0.517	0.374	7.36e-06
Rnf7	1.47e-07	0.193271	0.947	0.896	1.53e-06
Smarce1	1.21e-06	0.192941	0.941	0.905	9.04e-06
1810058I24Rik	1.96e-07	0.192827	0.973	0.93	1.93e-06
Ctbp2	8.51e-06	0.192488	0.736	0.614	5.01e-05
Ppp1ca	1.55e-09	0.192372	0.991	0.983	2.61e-08
Cnbp	6.13e-08	0.192002	0.994	0.981	7.12e-07
Grcc10	8.46e-07	0.191929	0.544	0.396	6.8e-06
Oaf	1.32e-05	0.191873	0.783	0.687	7.23e-05
Sec13	4.9e-06	0.191795	0.78	0.706	3.1e-05
Psma7	1.32e-07	0.191263	0.992	0.99	1.4e-06
Hnrnpm	1.19e-07	0.19112	0.981	0.971	1.28e-06
Fkbp8	5.95e-07	0.19063	0.928	0.869	5.06e-06
Ccar1	7.72e-06	0.190566	0.913	0.837	4.64e-05
Rtn4	1.42e-05	0.19048	0.928	0.883	7.68e-05
Tmem167	7.46e-07	0.190383	0.938	0.915	6.08e-06
Fkbp9	9.24e-06	0.190338	0.733	0.631	5.38e-05
Ssrp1	4.32e-06	0.190138	0.969	0.956	2.75e-05
Ube2n	6.76e-07	0.190086	0.963	0.9	5.61e-06
Brix1	3e-06	0.190035	0.807	0.716	2.01e-05
Pitpna	1.92e-06	0.189997	0.829	0.726	1.38e-05
Arpc5l	3.46e-06	0.189598	0.826	0.716	2.29e-05
Psmb3	3.06e-07	0.189562	0.966	0.944	2.91e-06
Apex1	1.05e-05	0.189552	0.817	0.765	5.94e-05
Ccdc124	2.6e-06	0.189486	0.851	0.789	1.79e-05
Mat2a	9.98e-06	0.189257	0.894	0.854	5.74e-05
Arpc2	7.13e-08	0.189167	0.988	0.959	8.11e-07
Rbmx	1.78e-05	0.188958	0.77	0.716	9.32e-05
Ssr2	1.08e-07	0.188934	0.969	0.954	1.18e-06
Acp1	3.37e-07	0.188902	0.948	0.93	3.14e-06
Slc1a5	0.00486808	0.188742	0.258	0.087	0.00913155
Cdk1	0.0213084	0.188647	0.873	0.862	0.0275312
Tcf3	2.04e-06	0.188279	0.807	0.716	1.44e-05
Enho	4.02e-05	0.188131	0.393	0.267	0.000179996
Hmgb3	3.74e-05	0.187993	0.974	0.968	0.000169325
Arf4	8e-06	0.187873	0.975	0.978	4.78e-05
Mri1	2.78e-06	0.187222	0.474	0.345	1.89e-05
Metap2	1.11e-07	0.186858	0.973	0.959	1.21e-06
Fbln5	0.000504145	0.186665	0.707	0.624	0.00148198
Lum	0.0291176	0.186609	0.174	0.119	0.0351094
Phf5a	8.7e-07	0.186572	0.947	0.91	6.96e-06
Akr1a1	2.85e-08	0.186526	0.99	0.978	3.7e-07
Alx1	0.00578492	0.186388	0.379	0.289	0.0103315
Cpxm1	4.14e-05	0.186266	0.668	0.585	0.000184417
Cops6	4.46e-07	0.185985	0.965	0.932	3.9e-06
Surf4	5.85e-06	0.185935	0.711	0.592	3.63e-05
Psmc4	2.5e-06	0.185891	0.935	0.888	1.74e-05
Pdia3	1.43e-06	0.185723	0.972	0.971	1.05e-05
Mrps24	1.01e-06	0.185154	0.942	0.881	7.84e-06
Tbcb	2.51e-06	0.185068	0.903	0.867	1.74e-05
Hoxa5	1.86e-05	0.184895	0.421	0.279	9.62e-05
Esd	1.94e-07	0.18489	0.977	0.949	1.92e-06
Capzb	1.17e-06	0.184535	0.952	0.922	8.79e-06
Aifm1	3.13e-06	0.184469	0.733	0.607	2.08e-05
Tra2b	2.73e-06	0.184385	0.963	0.922	1.87e-05
Scx	0.012474	0.184286	0.253	0.182	0.0183651
Scd2	3.24e-05	0.184244	0.778	0.665	0.000150664
Cnih1	5.02e-06	0.183617	0.801	0.714	3.15e-05
Ogfrl1	0.000380759	0.183599	0.549	0.483	0.00118699
Nrbp1	1.1e-05	0.183286	0.779	0.672	6.16e-05
Rbm42	4.06e-06	0.183036	0.736	0.619	2.62e-05
Ncapg	0.00054541	0.183014	0.585	0.507	0.00158995
Prdx2	1.68e-11	0.182844	0.997	0.995	4.15e-10
D8Ertd738e	2.39e-07	0.182724	0.969	0.951	2.33e-06
Ifrd1	9.07e-06	0.182683	0.523	0.398	5.3e-05
H19	0.00159126	0.182388	0.893	0.883	0.00381902
Taf12	4e-06	0.182164	0.585	0.466	2.59e-05
Hnrnpa2b1	7.36e-06	0.181997	0.995	0.998	4.46e-05
Mrpl20	2.94e-06	0.181879	0.917	0.847	1.99e-05
Hdac3	7.19e-06	0.181814	0.739	0.587	4.39e-05
Tmed1	5.36e-06	0.181774	0.757	0.604	3.35e-05
Myl6	6.5e-09	0.18147	1	1	9.58e-08
Mcm3	0.00474822	0.181439	0.743	0.694	0.00894504
Lamp1	2.61e-06	0.181396	0.961	0.903	1.79e-05
Vgll4	2.14e-05	0.181219	0.753	0.643	0.000107235
Ntm	0.000853961	0.181031	0.455	0.369	0.00230175
Hspd1	4.79e-05	0.180911	0.981	0.954	0.00021022
Chd3	8.36e-05	0.180792	0.926	0.925	0.000339801
Bex2	0.108957	0.180653	0.41	0.367	0.112821
Fth1	2.21e-10	0.180619	0.999	1	4.44e-09
Rsrc2	2.84e-06	0.180276	0.959	0.939	1.93e-05
Fam212a	7.09e-05	0.18026	0.729	0.66	0.0002942
Ccnd2	0.00281136	0.180219	0.937	0.93	0.00595587
Gtpbp4	9.15e-05	0.179776	0.724	0.636	0.000362887
Rangap1	0.00140886	0.179729	0.729	0.646	0.00346187
AU019823	3.8e-06	0.179669	0.523	0.383	2.47e-05
Rrm2	0.00404903	0.179511	0.691	0.602	0.00795279
Psmd6	3.05e-06	0.179284	0.948	0.898	2.04e-05
Atp5b	3.84e-08	0.179093	0.997	0.995	4.68e-07
Pbx1	0.00021448	0.17904	0.977	0.976	0.000733923
Ddx39	0.00035452	0.178984	0.788	0.721	0.00112115
Cnot6	2.04e-05	0.178729	0.757	0.675	0.000103508
Mthfd2	0.000110202	0.178694	0.419	0.325	0.00042248
Sparc	0.000215855	0.178614	0.991	0.976	0.000737189
Psmd3	6.54e-06	0.178602	0.857	0.811	4.04e-05
Wdr1	5.22e-05	0.178421	0.686	0.573	0.000223672
Eif3i	1.36e-07	0.178366	0.975	0.959	1.43e-06
Pofut2	2.3e-05	0.178154	0.709	0.587	0.000113103
Cct7	1.37e-06	0.177895	0.978	0.968	1.01e-05
Rbm3	9.39e-10	0.177799	0.999	0.998	1.68e-08
Tia1	2.22e-05	0.177773	0.85	0.811	0.000110116
Wdr43	7.81e-05	0.177699	0.773	0.699	0.00031954
Nol12	7.19e-06	0.177623	0.636	0.502	4.39e-05
Lman2	1.03e-05	0.177235	0.789	0.672	5.84e-05
Snrpf	6.06e-07	0.176568	0.991	0.983	5.13e-06
Taldo1	5.66e-06	0.176543	0.907	0.847	3.53e-05
Limd2	6.14e-05	0.176543	0.828	0.728	0.000258728
Aprt	0.00112967	0.176095	0.903	0.908	0.00290202
Sh3gl1	8.28e-06	0.175974	0.66	0.558	4.92e-05
Son	8.38e-07	0.175966	0.992	0.978	6.77e-06
H2afz	2.26e-05	0.175675	1	1	0.000111537
G3bp1	1.04e-05	0.175576	0.978	0.949	5.87e-05
Ddb1	2.42e-05	0.175566	0.819	0.735	0.000117646
Yipf5	2.09e-05	0.175539	0.744	0.621	0.00010538
P4hb	4.47e-05	0.175508	0.922	0.864	0.000197805
Tshz2	0.000906173	0.175446	0.902	0.876	0.00240548
Fbxo22	1.02e-05	0.175438	0.683	0.551	5.79e-05
Atp5g1	6.15e-07	0.175406	0.994	0.981	5.15e-06
Mvk	1.88e-05	0.175394	0.567	0.422	9.66e-05
Canx	9.47e-05	0.175385	0.89	0.859	0.000372835
Mdk	3.32e-07	0.175052	0.994	0.988	3.12e-06
Ubqln2	3.05e-05	0.175048	0.597	0.485	0.000143663
Arpc4	2.19e-05	0.174978	0.735	0.629	0.000109084
Pa2g4	3.16e-05	0.174889	0.942	0.896	0.000147831
Aes	0.000354508	0.17463	0.782	0.692	0.00112115
Tubb5	0.000580212	0.174249	1	1	0.00166372
Thoc3	2.53e-05	0.174225	0.817	0.745	0.000122538
Kif5b	1.46e-05	0.1742	0.946	0.883	7.87e-05
U2af1	1.3e-06	0.174084	0.979	0.964	9.68e-06
Psmb4	5.17e-07	0.174076	0.981	0.968	4.46e-06
Ccnb1	0.197524	0.174049	0.672	0.58	0.20155
Fdft1	0.000454001	0.173976	0.348	0.216	0.00136904
Mfap4	0.00410744	0.173962	0.817	0.786	0.00803151
Kcnq1ot1	0.0290573	0.173887	0.932	0.871	0.0350609
Cct8	1.11e-05	0.173841	0.99	0.978	6.21e-05
Mpdu1	2.37e-05	0.173787	0.589	0.468	0.000116285
Ctnnb1	2.16e-05	0.173785	0.977	0.944	0.000107796
Srsf7	3.82e-05	0.173542	0.977	0.978	0.000171958
Ssna1	2.02e-05	0.173272	0.876	0.772	0.000102379
Copb2	0.000107237	0.173223	0.889	0.83	0.000412812
Fbl	4.61e-05	0.173074	0.898	0.886	0.000203111
Pfn1	3.79e-08	0.172728	0.999	0.995	4.64e-07
Eftud2	1.62e-05	0.172506	0.672	0.553	8.65e-05
Hnrnpc	2.01e-06	0.172437	0.983	0.973	1.43e-05
Aco2	2.91e-05	0.17167	0.842	0.731	0.000137994
mt-Nd4	4.34e-07	0.171626	0.991	0.998	3.85e-06
Actb	3.4e-08	0.171591	1	1	4.22e-07
Phc2	3.82e-05	0.171575	0.671	0.527	0.000171958
Skp1a	1.78e-05	0.171557	0.907	0.85	9.32e-05
Cxcl12	0.0330409	0.171514	0.496	0.415	0.038695
Racgap1	0.0101747	0.171381	0.736	0.658	0.0156664
Tmem258	1.67e-06	0.171222	0.973	0.971	1.2e-05
Dlat	1.3e-05	0.17122	0.478	0.345	7.16e-05
Mcm5	0.00288558	0.171198	0.776	0.738	0.00606908
Hoxc9	0.000239894	0.170644	0.661	0.553	0.000802087
Commd7	5.22e-05	0.170617	0.664	0.578	0.000223672
Prmt5	2.14e-05	0.170401	0.479	0.325	0.000107235
Orc6	0.000289968	0.170335	0.733	0.675	0.000944283
Pcbp1	1.41e-06	0.170269	0.983	0.968	1.04e-05
Utp18	2.78e-05	0.170262	0.51	0.386	0.000132924
Eif4a1	4.52e-07	0.170081	0.997	0.993	3.94e-06
Ndufa5	3.55e-06	0.170079	0.981	0.959	2.34e-05
Chordc1	4.34e-05	0.170043	0.643	0.517	0.000192436
Selenoh	3.06e-05	0.169973	0.992	0.981	0.000143951
Rrs1	7.34e-05	0.169771	0.42	0.323	0.000302491
Hoxa9	0.000287212	0.169619	0.7	0.617	0.000940552
Tmem234	3.55e-05	0.169498	0.902	0.854	0.000161601
Anapc5	9.49e-06	0.169339	0.969	0.93	5.5e-05
Psmb2	3.71e-06	0.169203	0.97	0.942	2.42e-05
Ctps	0.000173213	0.169166	0.645	0.532	0.000615496
Ckap4	0.000101459	0.169041	0.948	0.898	0.000395425
Txn2	7.36e-05	0.168917	0.792	0.723	0.000302576
Gorasp2	6.65e-05	0.168799	0.59	0.459	0.000278124
Bgn	0.00408711	0.168655	0.872	0.825	0.00800964
Tax1bp3	6.47e-05	0.168419	0.729	0.597	0.000271383
Anxa5	0.000289536	0.168359	0.966	0.944	0.000944283
Luc7l3	6.03e-05	0.168284	0.925	0.883	0.00025568
Ppdpf	1.49e-05	0.168189	0.925	0.854	7.98e-05
Dda1	3.52e-05	0.167959	0.637	0.515	0.000161273
Stip1	0.000178746	0.167959	0.848	0.803	0.000631378
Pfn2	0.00454677	0.167713	0.567	0.485	0.00863986
Dynll2	5.63e-05	0.16764	0.832	0.74	0.00024061
Pclaf	0.0105926	0.167574	0.96	0.93	0.0160817
Ube2d3	1.32e-05	0.167526	0.983	0.947	7.25e-05
Mrpl27	3.54e-05	0.167433	0.646	0.536	0.000161601
Col3a1	0.000683903	0.16734	0.986	0.985	0.00191733
Hsph1	0.000147989	0.16729	0.434	0.333	0.000541289
Rex1bd	2.9e-05	0.167286	0.926	0.867	0.000137994
Puf60	1.79e-05	0.166997	0.944	0.893	9.32e-05
Psmc3	1.3e-05	0.166834	0.966	0.944	7.16e-05
Marcks	9.03e-05	0.166627	0.995	0.998	0.000360536
Dbn1	0.000190698	0.166616	0.74	0.621	0.000664219
Ube2l3	1.84e-05	0.166612	0.956	0.917	9.54e-05
Rfc3	0.00104283	0.166558	0.792	0.709	0.00269653
Ranbp1	9.78e-05	0.166481	0.991	0.99	0.000383168
Nol11	4.23e-05	0.166395	0.637	0.541	0.000188226
Dnttip2	4.07e-05	0.166382	0.836	0.745	0.000181861
Snrpc	1.99e-05	0.166372	0.951	0.917	0.000101824
Rcc2	0.000187133	0.16627	0.765	0.697	0.000654406
Nudc	8.63e-06	0.166073	0.97	0.961	5.06e-05
Pfdn1	1.74e-05	0.165926	0.925	0.879	9.17e-05
Birc5	0.0538766	0.165922	0.881	0.825	0.0586649
Smc2	0.0186914	0.165664	0.913	0.898	0.024998
Bola2	6.87e-05	0.165432	0.855	0.794	0.000286595
Cdk9	0.000121563	0.16521	0.696	0.619	0.000458018
Smarca4	0.000132089	0.16518	0.766	0.711	0.000489261
Cks1b	0.00113863	0.165161	0.981	0.968	0.00291649
Hmgn1	5.56e-08	0.165147	1	0.998	6.57e-07
Smim7	0.000154055	0.165124	0.823	0.718	0.000558807
Kif2c	0.00392428	0.165114	0.497	0.43	0.00774057
Pmf1	0.000128205	0.165067	0.779	0.706	0.000477905
Srsf6	9.19e-05	0.164976	0.933	0.893	0.000363484
Ssu72	0.000234176	0.164958	0.824	0.748	0.000787477
Rbm8a	6.11e-05	0.164931	0.963	0.937	0.000257788
Fkbp3	9.93e-06	0.164914	0.983	0.964	5.72e-05
Tomm70a	8.59e-05	0.164859	0.612	0.522	0.000347689
Tsn	2.53e-05	0.164558	0.95	0.944	0.000122538
Palld	0.0129011	0.164553	0.345	0.277	0.0188571
Stub1	1.36e-05	0.164519	0.974	0.964	7.42e-05
Tecr	3.36e-05	0.164453	0.941	0.92	0.00015454
Arhgdia	5.22e-05	0.164401	0.934	0.905	0.000223672
Vti1b	2.57e-05	0.164381	0.584	0.451	0.000123917
Fam133b	0.000125542	0.164381	0.836	0.784	0.000469977
Vps36	0.000115778	0.16435	0.78	0.689	0.000440007
Psma3	1.42e-05	0.164006	0.991	0.988	7.68e-05
Psmc2	3.9e-05	0.163843	0.943	0.881	0.000175409
Ddx39b	2.73e-05	0.163642	0.984	0.978	0.00013086
Arf1	1.02e-05	0.16356	0.988	0.983	5.79e-05
Mcm7	0.00816927	0.163538	0.829	0.811	0.0133513
Pin1	6.07e-05	0.163447	0.882	0.789	0.0002567
Tomm7	1.13e-05	0.163273	0.978	0.956	6.27e-05
Csrp1	0.000699899	0.163271	0.859	0.794	0.00195882
Eno1	0.000157653	0.163223	0.991	0.993	0.000567687
Ubl5	2.09e-05	0.163031	0.975	0.915	0.00010538
Trip11	0.000225395	0.162753	0.525	0.43	0.000763813
Cct3	8.66e-05	0.162647	0.974	0.964	0.000349618
Morf4l2	0.000314167	0.16261	0.973	0.959	0.00101367
Kif23	0.0201494	0.162512	0.615	0.553	0.026483
Nt5dc2	2.54e-05	0.162507	0.974	0.949	0.000122538
Kpnb1	0.000188441	0.162486	0.827	0.74	0.000657666
Rhoa	3.57e-05	0.162187	0.987	0.971	0.000162203
Psma4	1.58e-05	0.162184	0.984	0.961	8.43e-05
G3bp2	9.05e-05	0.162147	0.822	0.752	0.000360536
Xpnpep1	9.05e-05	0.162091	0.727	0.619	0.000360536
Atp5e	2.97e-08	0.162069	0.999	0.998	3.82e-07
Ndufa2	1.46e-06	0.161992	0.991	0.976	1.06e-05
Traf4	0.000227754	0.161925	0.702	0.617	0.000769407
6030408B16Rik	0.0012633	0.161825	0.636	0.532	0.00318002
Slc9a3r2	0.000754712	0.16177	0.552	0.415	0.00209218
Atp5j2	5.61e-08	0.161718	0.988	0.988	6.57e-07
Ppa1	0.000401713	0.161594	0.822	0.789	0.00124127
Ddx5	1.7e-05	0.161463	0.999	0.99	8.98e-05
Jpt1	0.0275368	0.161444	0.924	0.871	0.0335664
Psmc1	0.000285249	0.161431	0.885	0.813	0.000938481
Arpp19	3.28e-05	0.161211	0.955	0.939	0.000151998
Fkbp4	0.000194467	0.161146	0.965	0.937	0.000676003
Akt1	0.000127383	0.160977	0.886	0.837	0.000475854
Top1	1.68e-05	0.160892	0.999	0.983	8.87e-05
Elof1	0.000136278	0.160822	0.901	0.837	0.00050371
Cdca3	0.0216516	0.160753	0.695	0.655	0.0278514
Hspbp1	0.000107444	0.160531	0.41	0.294	0.000412812
Rps27	5.43e-19	0.160071	1	1	3.17e-17
Actr3	0.000807765	0.159973	0.933	0.908	0.00220094
Ctxn1	0.000282556	0.15989	0.689	0.609	0.000934034
Kif22	0.0275063	0.159841	0.685	0.6	0.0335592
Sgta	0.000163571	0.159806	0.828	0.76	0.000586047
Atox1	0.000103954	0.159801	0.903	0.854	0.000402299
Hist2h2aa1	0.0204148	0.159781	0.253	0.146	0.0267916
Mlf2	9.26e-05	0.159591	0.928	0.862	0.000365309
Sf3b5	0.000104221	0.159543	0.947	0.92	0.000402299
Siva1	0.000212131	0.159455	0.973	0.949	0.000728535
Serp1	0.000230267	0.15932	0.713	0.626	0.000775824
Ska3	0.000792924	0.159202	0.384	0.267	0.00216724
Fubp1	0.000171505	0.158731	0.968	0.961	0.000610724
Lbhd2	0.0198561	0.158587	0.377	0.316	0.0262352
Ppp2ca	0.00010179	0.158476	0.969	0.966	0.000395425
Ralgps2	0.000235919	0.158393	0.614	0.485	0.000790305
Flrt2	0.00726629	0.158247	0.556	0.485	0.0121423
Cwc15	0.00014262	0.158211	0.925	0.886	0.00052274
Il33	0.001326	0.158185	0.416	0.345	0.00329992
Cdca8	0.0867849	0.158182	0.801	0.779	0.0906661
Mrpl22	9.05e-05	0.158147	0.665	0.551	0.000360536
Gmnn	0.00332933	0.158136	0.802	0.687	0.00679044
Cdc37	7.34e-06	0.158133	0.983	0.956	4.46e-05
Nhs	0.000713688	0.158071	0.38	0.255	0.00199423
Tcf12	0.000935309	0.157993	0.798	0.733	0.00247159
Tsc22d1	0.000394625	0.157801	0.913	0.898	0.00122152
Spc24	0.0131586	0.157742	0.93	0.864	0.0191636
Ncln	8.3e-05	0.157302	0.481	0.34	0.000338192
Cdc16	0.000210434	0.157228	0.814	0.772	0.000724322
Fh1	0.000227924	0.157161	0.837	0.745	0.000769407
Rab1a	0.000140381	0.157013	0.776	0.655	0.000515612
Ppp1r11	0.000149161	0.156948	0.813	0.772	0.000544438
Matr3	0.000206565	0.15693	0.934	0.905	0.000712406
Rac1	8.89e-05	0.156877	0.957	0.91	0.000357365
Dpysl3	0.000490436	0.156866	0.514	0.422	0.00144991
Rad51	0.00347743	0.156645	0.514	0.417	0.00702103
Tcp1	2.4e-05	0.156426	0.986	0.976	0.000117476
Trim28	0.000116201	0.156323	0.929	0.871	0.00044066
Slc35b1	0.000129885	0.15625	0.605	0.488	0.000482115
Cmtm3	0.000274156	0.155742	0.704	0.6	0.000907981
Mdh1	0.000101158	0.155717	0.974	0.964	0.000395425
Alkbh1	0.000661666	0.155575	0.603	0.519	0.00186373
Cox6c	1.24e-07	0.15537	0.997	0.995	1.33e-06
Ndufb8	1.38e-05	0.155367	0.992	0.971	7.47e-05
Gpx1	0.000475769	0.155282	0.893	0.82	0.00141519
Gm29771	0.055606	0.155248	0.214	0.126	0.0602857
Git2	0.000316415	0.155231	0.527	0.417	0.00101755
Penk	0.179089	0.155205	0.766	0.75	0.182953
S100a11	0.000465044	0.155156	0.984	0.973	0.00139542
Ralb	0.000367822	0.155111	0.707	0.626	0.00115488
Zcchc17	0.000235169	0.155104	0.791	0.706	0.000789302
Psma6	0.000125471	0.155045	0.96	0.92	0.000469977
Pimreg	0.0416518	0.155001	0.597	0.529	0.0471713
Drg1	0.000173547	0.154907	0.766	0.66	0.000615496
Mtch2	0.000287027	0.154769	0.792	0.716	0.000940552
Commd2	0.000151785	0.154757	0.642	0.541	0.000552615
Tspan3	0.000196938	0.154677	0.953	0.925	0.000683239
Banf1	0.000157799	0.154594	0.973	0.954	0.000567687
Col5a2	0.00321392	0.154439	0.757	0.682	0.00664009
Cct4	4.83e-05	0.154436	0.979	0.956	0.0002115
Dynll1	0.0610432	0.154305	0.996	0.998	0.0655719
Hspe1	0.000104249	0.1543	0.99	0.988	0.000402299
Hist1h3c	0.00418185	0.154186	0.408	0.299	0.00814972
Nop56	0.00319735	0.154174	0.889	0.85	0.0066293
Mrpl48	0.000249027	0.154106	0.76	0.638	0.000829459
Smim12	0.00011577	0.153754	0.459	0.347	0.000440007
Rpap3	0.000155981	0.153634	0.566	0.454	0.000564624
Jpt2	0.000254597	0.153608	0.438	0.284	0.000846403
Hdlbp	0.00129747	0.153413	0.917	0.852	0.00325055
Myl12a	3.34e-05	0.153362	0.992	0.973	0.000153963
Hnrnpk	1.86e-05	0.153353	0.995	0.993	9.62e-05
Mrpl55	0.000152032	0.153196	0.572	0.468	0.000552615
Slc39a7	0.000412667	0.153196	0.721	0.621	0.00126841
Hist1h3e	0.00327107	0.153082	0.415	0.328	0.00671854
Nes	0.000574967	0.153076	0.492	0.362	0.00165681
Sdf2l1	0.000316532	0.153065	0.455	0.328	0.00101755
Elavl1	0.000618294	0.15306	0.875	0.837	0.00175567
Nono	5.17e-05	0.153053	0.978	0.976	0.000223528
Psat1	0.000549663	0.153039	0.513	0.386	0.00159968
Rnf187	0.000243581	0.152829	0.928	0.857	0.000812863
Pgp	0.00161644	0.152805	0.818	0.82	0.00385307
Lgals1	0.00564274	0.152788	0.997	0.993	0.0101813
Nsfl1c	0.000216921	0.152679	0.819	0.745	0.00073939
Psmb1	4.96e-06	0.152639	0.99	0.983	3.13e-05
Bloc1s2	0.000114716	0.152572	0.522	0.362	0.000437869
Mettl1	0.00131485	0.15256	0.638	0.536	0.0032795
Prmt1	0.000218165	0.152538	0.994	0.99	0.000742185
mt-Nd1	5.92e-05	0.152509	0.991	0.988	0.000252253
Eif1ax	0.000465937	0.152507	0.882	0.796	0.00139542
Hnrnpu	0.00855933	0.152459	0.99	0.995	0.0138467
Triap1	0.000139862	0.152398	0.491	0.374	0.000514785
Dbf4	0.0206225	0.152324	0.678	0.561	0.0269631
Lta4h	0.000180592	0.152211	0.652	0.529	0.000636615
Top2b	0.00286659	0.152154	0.899	0.845	0.00604365
Cebpz	0.000666314	0.152149	0.718	0.653	0.00187381
Pcna	0.00148002	0.152132	0.509	0.415	0.00359141
Qser1	0.000846524	0.152122	0.49	0.403	0.00228522
Txnl1	6e-05	0.152036	0.969	0.949	0.000254938
Aurkaip1	0.000181088	0.151944	0.928	0.881	0.000637081
Ctsd	0.000337776	0.15183	0.736	0.658	0.00107597
Flna	0.00227896	0.151818	0.935	0.917	0.0050223
Srp9	0.000101763	0.151706	0.964	0.951	0.000395425
Smarcd2	0.000184245	0.151704	0.566	0.456	0.000646888
Nubp1	0.000489829	0.15165	0.671	0.536	0.00144991
Phb2	0.00015631	0.151595	0.964	0.956	0.000564651
Cct5	6.26e-05	0.151561	0.995	0.981	0.000262934
Kansl2	0.000185486	0.151441	0.585	0.515	0.000649941
Ppp1cc	0.000313468	0.151278	0.965	0.937	0.00101328
Adamtsl1	0.00781014	0.151239	0.324	0.262	0.0128878
Oxct1	0.0005425	0.151232	0.969	0.954	0.0015841
Usp14	0.00058145	0.151184	0.807	0.752	0.00166454
Psma1	0.000203156	0.151119	0.921	0.896	0.00070203
Crip2	0.00597455	0.151085	0.506	0.434	0.0105625
Etaa1os	0.0571887	0.150968	0.231	0.095	0.0617723
Dtd1	0.000576783	0.150891	0.562	0.466	0.00165932
Cdc5l	0.000789976	0.150891	0.836	0.767	0.00216431
Ywhae	1.19e-05	0.150731	0.996	0.993	6.59e-05
Ptgis	0.00603115	0.150659	0.726	0.682	0.0106245
Nt5c3b	0.000361147	0.150415	0.689	0.583	0.00113596
Tpm2	0.0017562	0.150345	0.959	0.947	0.00410512
Sec61a1	0.000294107	0.150118	0.61	0.498	0.000954213
Tubb2b	0.00664812	0.150049	0.3	0.248	0.0113968
Lsm6	0.000420554	0.150027	0.963	0.925	0.00128378
Hmga2	0.00123665	0.149978	0.484	0.367	0.00312695
Mrps15	0.000326289	0.149877	0.828	0.774	0.00104317
Smo	0.000813451	0.149691	0.796	0.723	0.00220815
Batf3	0.00308904	0.149685	0.354	0.252	0.00641994
Rab24	0.000285508	0.14966	0.72	0.595	0.000938481
Uqcr10	7.13e-05	0.149626	0.977	0.973	0.000295215
Spcs2	0.000129336	0.149521	0.974	0.961	0.000481099
Hook3	0.00104084	0.149474	0.714	0.641	0.00269653
Ndn	0.00257874	0.149446	0.764	0.667	0.00554349
Med19	0.000375793	0.149185	0.642	0.553	0.0011736
Sf3a3	0.0004169	0.149171	0.855	0.796	0.00127918
Bub3	0.0259876	0.149108	0.89	0.813	0.0320635
Fzr1	0.00872997	0.149089	0.585	0.495	0.0140837
Copg1	0.000420599	0.149052	0.734	0.675	0.00128378
Ube2c	0.429686	0.149009	0.776	0.743	0.43067
Rasl11b	0.00603995	0.148973	0.466	0.398	0.0106245
Cenpf	0.317998	0.148912	0.735	0.704	0.321113
Cuedc1	0.000324211	0.148789	0.571	0.478	0.00103984
Mrpl3	0.000291607	0.148706	0.676	0.568	0.000947857
Ddost	0.00013797	0.148673	0.966	0.954	0.000508893
Cacybp	0.00531326	0.148635	0.955	0.956	0.00972423
Mmp14	0.00285086	0.148625	0.872	0.828	0.00601772
Cops3	0.000446467	0.148624	0.858	0.784	0.00134864
Rrbp1	0.00280832	0.14855	0.968	0.959	0.00595587
Hmgb2	0.106611	0.148525	1	0.998	0.110522
Mrpl58	0.000406633	0.148521	0.876	0.808	0.00125206
Psma2	0.000114128	0.148157	0.977	0.976	0.000436578
Ccdc102a	0.000287848	0.148143	0.634	0.515	0.000940875
Ss18	0.000457451	0.148062	0.714	0.595	0.00137707
Ndufa1	0.000443672	0.148036	0.86	0.782	0.00134483
Zfp207	0.000496485	0.148006	0.829	0.777	0.00146192
Uqcc2	0.00130281	0.147909	0.953	0.951	0.00325609
Tex30	0.000558287	0.147896	0.518	0.43	0.00161406
Gipc1	0.000602123	0.147885	0.837	0.769	0.00171253
Psmd2	0.00237025	0.147872	0.921	0.893	0.00517791
Anapc15	0.000967087	0.14787	0.597	0.49	0.00253643
Ube2v2	0.000552464	0.147868	0.849	0.755	0.00160278
Tbpl1	0.000324652	0.14786	0.574	0.461	0.00103984
Slc25a3	8.51e-06	0.147773	0.995	0.988	5.01e-05
Skp2	0.00136729	0.147705	0.636	0.517	0.00337869
Mrps34	0.000474278	0.147661	0.691	0.619	0.00141519
Dhx15	0.0006274	0.147592	0.859	0.774	0.00177291
Tceal8	0.00178124	0.147554	0.884	0.857	0.0041499
Csnk2b	0.000889087	0.147514	0.921	0.85	0.0023709
Taf1d	0.00352961	0.14751	0.897	0.859	0.00709975
Mrfap1	1.94e-05	0.147474	0.996	0.998	9.96e-05
Mbd3	0.00021249	0.147456	0.978	0.951	0.000728535
Eif4h	0.00046549	0.147353	0.97	0.917	0.00139542
Rpn1	0.00143397	0.147246	0.848	0.786	0.00350682
Nans	0.000512606	0.147219	0.694	0.609	0.00150323
Yae1d1	0.00198363	0.14719	0.649	0.59	0.00447851
Dctn2	0.000552557	0.147115	0.897	0.828	0.00160278
Snrnp70	0.00035775	0.147012	0.969	0.954	0.00112933
Eif3a	0.000445649	0.146971	0.978	0.978	0.00134849
Lef1	0.0660135	0.14688	0.221	0.119	0.070393
Smu1	0.00058512	0.146817	0.775	0.701	0.00166959
Morf4l1	0.000124006	0.146674	0.995	0.993	0.000466221
Tomm40	0.00159389	0.146662	0.846	0.811	0.00382009
Tmem176a	0.00392772	0.146556	0.788	0.677	0.00774057
Sar1b	0.000489714	0.146536	0.7	0.636	0.00144991
Ppih	0.000592239	0.146444	0.771	0.694	0.00168716
Pmvk	0.000283583	0.146342	0.536	0.4	0.000935663
Cops4	0.000422766	0.146262	0.916	0.85	0.00128815
Hist1h4i	0.00844329	0.14601	0.518	0.386	0.0136969
Rab11b	0.000923854	0.145945	0.837	0.755	0.002445
Baz1b	0.00671381	0.145917	0.817	0.762	0.0114645
Hist1h3b	0.0092045	0.145906	0.322	0.231	0.014687
Zyx	0.000583271	0.145868	0.557	0.447	0.00166703
Ift20	0.00114674	0.145854	0.863	0.799	0.00292869
Ptpa	0.000419707	0.14585	0.645	0.544	0.00128378
Slc25a17	0.000406053	0.145841	0.603	0.493	0.00125206
Zfp503	0.0104041	0.145796	0.749	0.675	0.0158918
Ube2k	0.00093951	0.145731	0.924	0.898	0.00247895
2410004B18Rik	0.000358506	0.145722	0.589	0.466	0.00112968
Cdc26	0.000532758	0.145603	0.898	0.847	0.00155825
Hic1	0.00605125	0.145596	0.867	0.816	0.0106337
Selenof	8.58e-05	0.145537	0.986	0.973	0.000347689
Cycs	0.00781949	0.145321	0.882	0.862	0.0128878
Txndc9	0.00165226	0.145216	0.793	0.709	0.00390655
Ptrh2	0.000474918	0.14516	0.614	0.495	0.00141519
Tomm5	0.000893238	0.145064	0.888	0.833	0.00237835
Carnmt1	0.000783637	0.145042	0.826	0.745	0.0021587
Nsdhl	0.0161356	0.144837	0.274	0.165	0.0223651
Evl	0.000653138	0.144794	0.761	0.653	0.00184267
Naa38	0.000839828	0.144743	0.779	0.687	0.00227064
Dynlt1f	0.000716776	0.144664	0.694	0.59	0.00199831
Eif1a	0.00217384	0.144643	0.68	0.595	0.00484345
Mrps7	0.000513091	0.144466	0.867	0.789	0.00150323
Fis1	0.000436033	0.144292	0.96	0.947	0.00132627
Dynlrb1	0.000624534	0.14424	0.929	0.917	0.00176766
Ubtf	0.00248997	0.144238	0.845	0.813	0.00539905
Tmem256	0.00035354	0.143817	0.95	0.939	0.00112115
2610524H06Rik	0.000989666	0.14374	0.686	0.575	0.0025802
Smc1a	0.00907048	0.143685	0.959	0.942	0.0145407
Ccdc59	0.000801033	0.143629	0.818	0.738	0.002186
Lxn	0.000885161	0.143597	0.402	0.286	0.00236403
Alyref	0.0018207	0.143534	0.95	0.927	0.00419718
Rpl36	8.28e-14	0.143526	1	0.998	2.59e-12
Msl1	0.000352171	0.143513	0.589	0.483	0.00111979
Srp19	0.000856378	0.143419	0.897	0.859	0.00230472
Mrpl15	0.00074707	0.143375	0.857	0.801	0.00207427
Ncbp2	0.00176754	0.143372	0.806	0.731	0.00412347
Prkag1	0.000336833	0.143228	0.549	0.398	0.00107492
Akr1b3	0.0016113	0.143183	0.695	0.57	0.00384605
Ube2d2a	0.000720671	0.143098	0.902	0.874	0.00200415
Rpl38	1.71e-14	0.143061	1	1	5.66e-13
Erg28	0.00366726	0.143014	0.798	0.704	0.00732616
6330403K07Rik	0.00390517	0.142945	0.557	0.515	0.00771348
Psma5	0.000374797	0.142942	0.97	0.947	0.00117258
Mrpl42	0.000496253	0.142812	0.95	0.92	0.00146192
Myh10	0.022301	0.142745	0.922	0.896	0.0284985
Nup43	0.000442416	0.142641	0.612	0.505	0.00134335
Ndufs3	0.000868022	0.142641	0.888	0.857	0.00233248
2810474O19Rik	0.0196968	0.142641	0.74	0.723	0.0260769
Gm16152	0.268448	0.142641	0.164	0.032	0.271548
Emc8	0.000809366	0.142571	0.831	0.777	0.00220188
Smim27	0.000557358	0.142516	0.474	0.364	0.00161404
Hmg20b	0.00126095	0.142496	0.796	0.743	0.00317868
Cdh11	0.00611774	0.142493	0.947	0.947	0.0106969
Tubb4b	0.25082	0.142333	0.979	0.947	0.254451
Hist1h1d	0.0450231	0.142332	0.452	0.388	0.0503386
Aurkb	0.111064	0.142178	0.656	0.587	0.114935
Copz1	0.00104506	0.142169	0.674	0.568	0.00269653
Hdgfl2	0.000814192	0.141993	0.776	0.706	0.00220815
Ccna2	0.166756	0.141954	0.779	0.718	0.170652
Arl2bp	0.00170196	0.14195	0.744	0.66	0.00400784
Mdh2	0.00136185	0.141928	0.961	0.954	0.00337001
Dnajb11	0.00144666	0.141918	0.773	0.682	0.00352509
Agtr2	0.0105604	0.141814	0.327	0.226	0.0160467
Ddx18	0.00171952	0.141782	0.807	0.74	0.00404376
Memo1	0.000490752	0.141427	0.503	0.43	0.00144991
Ccdc88a	0.00677423	0.141293	0.871	0.816	0.0115337
Prpf31	0.000916707	0.141281	0.707	0.619	0.00242976
Nxn	0.00114154	0.141155	0.621	0.515	0.00291968
Smarcd3	0.000579978	0.14107	0.452	0.337	0.00166372
Smchd1	0.00549166	0.140816	0.831	0.794	0.00996002
Bex3	0.00016395	0.140815	0.994	0.995	0.000586206
Nme2	0.00929197	0.140763	0.306	0.167	0.0147727
Mtap	0.00168267	0.140759	0.66	0.573	0.00396775
Incenp	0.132921	0.140694	0.687	0.624	0.136826
Ywhab	0.00195504	0.140667	0.965	0.939	0.00442536
Samd14	0.000781232	0.14056	0.407	0.299	0.00215546
Knstrn	0.0472583	0.140517	0.707	0.643	0.0522706
Nav1	0.005619	0.140482	0.459	0.35	0.010149
Tmem121	0.00124146	0.140462	0.494	0.374	0.00313406
Ptov1	9.5e-05	0.140405	0.987	0.99	0.000373307
Hmgcr	0.00325143	0.140316	0.386	0.289	0.00668604
Ubb	0.00119479	0.140198	1	1	0.0030452
Mcrip1	0.000964348	0.140086	0.926	0.891	0.00253642
Rcc1	0.000771403	0.140018	0.518	0.41	0.00213507
Tmem158	0.0213712	0.139974	0.276	0.153	0.0275544
Haus8	0.00126752	0.139903	0.506	0.405	0.0031815
Prpf19	0.000982175	0.139849	0.877	0.811	0.00256449
Thoc1	0.000978735	0.139623	0.433	0.318	0.00255932
Gas6	0.037184	0.139337	0.258	0.18	0.0428594
Emc6	0.00151805	0.139335	0.819	0.762	0.00366845
Mea1	0.000790617	0.139291	0.566	0.493	0.00216431
Bok	0.0549163	0.139291	0.58	0.517	0.0596118
Arl1	0.00227181	0.139145	0.941	0.91	0.00501286
Ipo9	0.00142691	0.139139	0.556	0.473	0.00349644
Gnl3	0.017198	0.139121	0.779	0.723	0.0235031
Postn	0.209221	0.139104	0.208	0.175	0.212989
Map2k2	0.00204844	0.13909	0.903	0.896	0.00459345
Vdac1	0.000786005	0.139088	0.965	0.951	0.00216182
Eif4ebp1	0.00249743	0.139057	0.761	0.694	0.00540852
Eif1ad	0.00108774	0.139001	0.647	0.524	0.00280253
Pole3	0.00241483	0.138905	0.767	0.701	0.00525562
Ggnbp2	0.00198303	0.13876	0.663	0.566	0.00447851
Pnn	0.00678067	0.138754	0.941	0.917	0.0115337
Timm50	0.00206829	0.138677	0.801	0.728	0.00462791
Hist1h3f	0.0468088	0.138635	0.245	0.148	0.0519046
Creb3l1	0.00236355	0.138624	0.426	0.328	0.0051697
Tma7	0.00101075	0.138538	0.977	0.968	0.00263126
Ppig	0.00139256	0.13846	0.95	0.934	0.00343629
Zfp322a	0.00112001	0.138377	0.579	0.471	0.00288143
Txndc12	0.00140524	0.138287	0.752	0.638	0.00345816
Dnajc2	0.00208532	0.138204	0.773	0.689	0.00466006
Tardbp	0.00347959	0.138154	0.831	0.762	0.00702103
Kif20a	0.0902256	0.138139	0.506	0.471	0.0941484
Psmb5	0.000562518	0.13812	0.975	0.968	0.00162361
Cdkn3	0.0994886	0.138106	0.468	0.437	0.103629
Aars	0.00078797	0.138061	0.478	0.352	0.00216383
Auts2	0.0127752	0.138018	0.853	0.808	0.0187298
Mki67	0.202489	0.137971	0.811	0.777	0.206377
Gtf2e2	0.00184642	0.137854	0.748	0.655	0.00423599
Prelid1	0.00140537	0.137854	0.978	0.959	0.00345816
Ube2i	0.000200869	0.137822	0.988	0.983	0.0006955
Pafah1b2	0.00163602	0.137666	0.774	0.663	0.00389445
Rars	0.00131592	0.137653	0.767	0.709	0.0032795
Kdelr1	0.00174997	0.137514	0.915	0.871	0.00409887
Zfp945	0.00164274	0.137442	0.376	0.238	0.00389457
Etf1	0.00188107	0.137427	0.677	0.614	0.00428488
Npm3	0.00187346	0.137322	0.876	0.842	0.00427941
Tmed2	0.00614693	0.137192	0.963	0.942	0.0107265
Hist1h1a	0.0637012	0.137063	0.45	0.41	0.0681763
Nmd3	0.00104266	0.137031	0.544	0.403	0.00269653
Farsb	0.00120055	0.137025	0.541	0.449	0.00305278
Med8	0.00103766	0.136987	0.637	0.58	0.00269653
Cnep1r1	0.00119583	0.136974	0.531	0.434	0.0030452
Eif4g2	0.00532293	0.136913	0.991	0.983	0.00972447
Gars	0.00205027	0.136879	0.685	0.578	0.00459345
Nelfcd	0.00123686	0.136835	0.698	0.587	0.00312695
Nagk	0.00129874	0.136819	0.483	0.359	0.00325055
Cnpy2	0.0014574	0.136791	0.981	0.944	0.00354633
Slc25a4	1.07e-06	0.13679	1	1	8.24e-06
Dazap1	0.00260648	0.13661	0.915	0.891	0.00558943
Sfswap	0.000948721	0.136601	0.561	0.425	0.00249949
Wdr18	0.00202088	0.136588	0.743	0.638	0.00453985
Lims1	0.00572859	0.136497	0.823	0.76	0.0102728
Pmpca	0.000883663	0.136492	0.557	0.432	0.00236363
Hnrnpf	0.000621691	0.136472	0.996	0.995	0.00176246
Tmem176b	0.0060912	0.136455	0.814	0.75	0.0106741
Mars	0.00165451	0.136378	0.495	0.422	0.0039066
Oat	0.00221983	0.136373	0.915	0.864	0.00492296
Dapk3	0.000872893	0.136335	0.568	0.442	0.00233839
Btf3	4.21e-07	0.136325	1	0.998	3.77e-06
Rtf1	0.00164553	0.136318	0.932	0.903	0.0038959
Hells	0.0289383	0.136316	0.661	0.592	0.0349866
Manbal	0.000965636	0.136272	0.641	0.534	0.00253642
Fen1	0.00725323	0.136259	0.629	0.495	0.0121372
Elob	5.15e-05	0.136163	0.997	0.998	0.000223249
Topbp1	0.00610143	0.136093	0.693	0.621	0.010679
Cdk7	0.00141417	0.135988	0.553	0.471	0.00347005
Cpsf2	0.00122223	0.135958	0.578	0.471	0.0030989
Skiv2l2	0.00184118	0.135956	0.633	0.546	0.00423326
Jmjd6	0.00126559	0.135918	0.69	0.563	0.00318121
Cenpw	0.0101132	0.135876	0.796	0.709	0.0156198
Fam49b	0.0018472	0.135843	0.413	0.274	0.00423599
Bmp1	0.00087262	0.135778	0.615	0.498	0.00233839
Mrpl17	0.00195254	0.135679	0.866	0.801	0.00442536
Rab26os	0.00936227	0.135652	0.314	0.204	0.014871
Poldip2	0.00136075	0.135607	0.69	0.607	0.00337001
Rpl7l1	0.00174598	0.13558	0.879	0.828	0.00409499
Parl	0.00104414	0.135544	0.568	0.473	0.00269653
Mrpl18	0.00656387	0.135508	0.926	0.893	0.0112744
Tk1	0.017732	0.13545	0.663	0.556	0.024008
Luc7l	0.00175733	0.135446	0.658	0.549	0.00410512
Arpc5	0.00393626	0.135317	0.867	0.837	0.00774869
Prpf40a	0.00421914	0.135198	0.939	0.913	0.00819735
Stoml2	0.00164015	0.13511	0.828	0.718	0.00389457
Cops8	0.00189236	0.135077	0.819	0.743	0.00430016
Twist1	0.0221676	0.135009	0.698	0.641	0.0283693
Qdpr	0.00180185	0.134948	0.664	0.59	0.0041702
Syncrip	0.00967616	0.134905	0.922	0.893	0.0152042
Gdi2	0.00143563	0.134899	0.975	0.959	0.00350682
Gemin7	0.0025168	0.134825	0.77	0.689	0.00544376
Mrps12	0.0016047	0.134807	0.678	0.609	0.00383572
Ssr1	0.00379017	0.134797	0.841	0.777	0.00752024
Wdr75	0.00113677	0.134766	0.468	0.333	0.00291598
Dnajb1	0.00097062	0.134676	0.561	0.422	0.00254189
Aspm	0.10547	0.134639	0.468	0.413	0.109404
Rbm25	0.00180053	0.134536	0.984	0.947	0.0041702
Sdhb	0.00278245	0.134436	0.932	0.893	0.00590891
Srpk1	0.00199092	0.134403	0.752	0.646	0.00448917
Gdnf	0.0367337	0.134265	0.465	0.417	0.0423962
Zfp398	0.0280727	0.1342	0.271	0.16	0.0341077
Dld	0.00234486	0.134018	0.725	0.66	0.00514168
Pdlim7	0.00447731	0.133923	0.788	0.714	0.00854217
2310009B15Rik	0.00324107	0.133897	0.599	0.502	0.00667855
Mrpl51	0.00378968	0.133888	0.938	0.913	0.00752024
Cdc123	0.00338581	0.133847	0.795	0.752	0.00687358
Sec11a	0.00178868	0.133816	0.926	0.888	0.00416172
Smarcb1	0.00256652	0.133769	0.884	0.818	0.005524
Mrpl12	0.00290715	0.133701	0.908	0.881	0.0060998
Atp2b1	0.0249265	0.133612	0.893	0.852	0.0310827
Vcan	0.0106652	0.133595	0.619	0.563	0.0161442
Idi1	0.0729427	0.133578	0.245	0.148	0.0772179
Hacd2	0.0048629	0.133511	0.508	0.427	0.00913155
Rab1b	0.00155815	0.133494	0.614	0.522	0.00375498
Pdcd10	0.0023829	0.133448	0.748	0.689	0.00519905
Nxt1	0.00383988	0.133438	0.735	0.665	0.00760166
Med10	0.00180597	0.133259	0.66	0.57	0.00417421
Smc3	0.00269473	0.133161	0.964	0.956	0.00574351
Ruvbl1	0.00432945	0.133144	0.889	0.871	0.00835363
Eif3g	0.00422988	0.133111	0.898	0.867	0.0081989
Yeats4	0.002112	0.133054	0.822	0.709	0.00471367
Bin1	0.00267534	0.133018	0.602	0.507	0.00570913
Midn	0.00173584	0.132906	0.513	0.391	0.00407665
Papola	0.00293301	0.132852	0.897	0.852	0.00614668
Brk1	0.00422032	0.132773	0.897	0.864	0.00819735
Cox4i1	9.72e-07	0.132673	0.997	0.998	7.63e-06
Sec62	0.00154085	0.132592	0.984	0.968	0.0037184
Igf1	0.421872	0.132511	0.127	0.041	0.423322
Plekhg2	0.00323643	0.132496	0.516	0.398	0.00667855
Gtf2h5	0.00331891	0.132442	0.944	0.896	0.00677707
Snai2	0.0925735	0.13244	0.811	0.808	0.0965409
Efnb1	0.00497655	0.13241	0.528	0.442	0.00926559
Mgat2	0.00348246	0.132368	0.7	0.609	0.00702103
Zdhhc16	0.00149401	0.132366	0.461	0.359	0.00362034
H2afx	0.31245	0.13221	0.953	0.93	0.315693
Sem1	0.000300333	0.132194	0.997	0.99	0.000972611
Leo1	0.00254964	0.131987	0.696	0.607	0.00549743
Rcbtb2	0.00360174	0.131977	0.802	0.752	0.00721996
Med28	0.00240855	0.131957	0.831	0.728	0.00524847
Tmx2	0.00135448	0.131922	0.482	0.364	0.00336127
Mapre1	0.00380085	0.131885	0.93	0.876	0.00753291
Fstl1	0.022893	0.131861	0.965	0.951	0.0291274
Sumf2	0.00143716	0.131822	0.439	0.301	0.00350682
Pdlim2	0.00547228	0.131805	0.921	0.867	0.00993517
Rnf26	0.0158056	0.131753	0.624	0.556	0.0220297
Med30	0.00160478	0.131592	0.509	0.388	0.00383572
Pbrm1	0.00924396	0.131504	0.891	0.82	0.0147098
Cbfb	0.0019177	0.13149	0.535	0.432	0.00435209
Ppp6r3	0.00164086	0.131485	0.47	0.383	0.00389457
Cyb5r3	0.00370258	0.13146	0.767	0.709	0.0073799
Ndufa9	0.00308362	0.131387	0.783	0.714	0.00641994
Strap	0.00703234	0.131308	0.907	0.879	0.0118925
Psmd11	0.00306093	0.13125	0.898	0.837	0.00639183
Snx3	0.00354336	0.131178	0.956	0.947	0.00711564
Serf2	5.18e-05	0.131146	0.997	0.998	0.000223593
Mrpl11	0.00264736	0.131077	0.807	0.718	0.00566322
Prkar1a	0.004886	0.13099	0.961	0.947	0.00914948
Gpx4	0.00183098	0.130978	0.986	0.968	0.00421533
Lap3	0.00338971	0.130941	0.752	0.684	0.00687358
Hikeshi	0.0028479	0.130927	0.801	0.711	0.00601772
Ndufb7	0.00202117	0.13091	0.955	0.922	0.00453985
Vim	0.0137869	0.130848	0.996	0.995	0.019864
Mob2	0.00149684	0.130834	0.478	0.379	0.00362219
Smyd2	0.00252815	0.130705	0.584	0.495	0.00546155
Hist1h2bj	0.0351094	0.13069	0.293	0.197	0.0407632
Akr7a5	0.00302394	0.130689	0.711	0.629	0.00632213
H2afv	0.0184195	0.130686	1	0.998	0.0247286
Nedd8	0.000836493	0.130603	0.992	0.983	0.00226512
Tmed10	0.00179117	0.130601	0.973	0.976	0.00416197
Anp32e	0.0282199	0.130594	0.934	0.905	0.0342154
Shkbp1	0.00223108	0.130586	0.444	0.335	0.00494166
1810022K09Rik	0.00374576	0.130474	0.858	0.794	0.00745746
Tacc3	0.162146	0.130434	0.72	0.67	0.166226
Cbx1	0.0033341	0.130433	0.984	0.978	0.00679226
Map4k4	0.00949229	0.130428	0.831	0.779	0.0150366
4930453N24Rik	0.00273695	0.130339	0.667	0.585	0.0058264
Mrpl52	0.00462544	0.130308	0.97	0.959	0.00873252
Wdr6	0.0015719	0.130228	0.483	0.398	0.00378292
Setd2	0.00248039	0.130219	0.566	0.471	0.00538493
Ppid	0.0062132	0.13012	0.855	0.837	0.0108065
Rab35	0.00235433	0.130059	0.419	0.299	0.00515599
Anp32b	0.000717428	0.130052	0.997	1	0.00199831
Krtcap2	0.00324398	0.130045	0.978	0.93	0.00667855
Hnrnpdl	0.0269862	0.129986	0.984	0.976	0.0331091
Magoh	0.0029845	0.129972	0.908	0.862	0.00624713
Sema6a	0.00789872	0.129945	0.517	0.444	0.0129736
Nop58	0.0169817	0.129882	0.95	0.91	0.0232618
Tmem109	0.00258298	0.129856	0.637	0.529	0.0055458
Ntan1	0.0043437	0.129844	0.85	0.786	0.00835363
Srsf11	0.00287361	0.129828	0.968	0.934	0.00605115
Mrpl49	0.00234076	0.129738	0.673	0.561	0.0051391
Psmd4	0.00434191	0.129738	0.937	0.913	0.00835363
Pdzd2	0.0103226	0.129738	0.514	0.451	0.0158087
Ssr3	0.00951166	0.129646	0.908	0.864	0.0150537
Mfge8	0.0534814	0.12963	0.872	0.833	0.0582708
Coq7	0.00617022	0.129629	0.846	0.791	0.0107564
Dpf2	0.00147094	0.129617	0.522	0.417	0.00357432
Ash2l	0.00306579	0.129599	0.776	0.667	0.00639436
Polr2a	0.0103473	0.129579	0.77	0.711	0.0158299
Ckap2l	0.0779908	0.129519	0.668	0.595	0.0821647
Tsen34	0.00534479	0.129514	0.948	0.93	0.00975425
Mthfd2l	0.00217568	0.129446	0.474	0.369	0.00484345
Grb10	0.00457274	0.129382	0.926	0.881	0.00866101
Cox5a	0.00423048	0.129299	0.99	0.985	0.0081989
Fancl	0.00531724	0.12929	0.353	0.233	0.00972423
Ppp2r1a	0.00331441	0.129259	0.804	0.697	0.00677707
Lactb	0.00819103	0.129199	0.345	0.221	0.0133744
Ndufa11	0.00266319	0.129185	0.973	0.92	0.00569014
Ndufa8	0.00289662	0.129095	0.937	0.922	0.006085
Nfyb	0.00720718	0.129024	0.714	0.672	0.0121241
Atf6b	0.00229189	0.129006	0.415	0.294	0.00503813
Zfr	0.0071241	0.128963	0.646	0.6	0.0120129
Utp11	0.00428833	0.128873	0.885	0.816	0.00829543
Pdrg1	0.00188319	0.128839	0.568	0.442	0.00428488
Lsg1	0.00188017	0.12865	0.562	0.468	0.00428488
Atp5o.1	0.000384517	0.128492	0.996	0.993	0.00119487
Zwint	0.00540567	0.128468	0.855	0.748	0.00984368
Cryab	0.372411	0.128379	0.123	0.097	0.374549
B3gat3	0.00243846	0.12835	0.469	0.367	0.00530047
Eif3c	0.00132947	0.12828	0.968	0.964	0.00330388
Yap1	0.00181	0.128275	0.474	0.369	0.00417803
Exosc8	0.0066704	0.128247	0.862	0.833	0.0114238
Hibadh	0.00966421	0.128236	0.607	0.519	0.0151999
Tmem183a	0.00283221	0.128086	0.611	0.527	0.00599278
Ahsa2	0.00219044	0.128036	0.571	0.471	0.00487011
Flywch1	0.00179981	0.127962	0.513	0.417	0.0041702
Ythdf2	0.00354563	0.127872	0.673	0.529	0.00711564
Adsl	0.00228905	0.127864	0.506	0.398	0.00503813
Srsf10	0.00574418	0.127842	0.929	0.9	0.0102902
Arcn1	0.00784189	0.127839	0.711	0.633	0.0129126
Hoxc6	0.00489297	0.127797	0.605	0.519	0.00914948
Ssbp3	0.00551745	0.127722	0.824	0.731	0.00998612
Arhgap11a	0.0257159	0.127656	0.435	0.362	0.0319081
Nudt16l1	0.00158918	0.127625	0.514	0.403	0.00381902
Pspc1	0.0043632	0.127612	0.629	0.519	0.00838193
Tlnrd1	0.00308822	0.127579	0.403	0.308	0.00641994
Hspa4	0.0160232	0.127502	0.882	0.789	0.0222622
Far1	0.00226816	0.127451	0.452	0.347	0.00501112
Pithd1	0.00945859	0.127383	0.323	0.199	0.0150104
Sec61a2	0.00219378	0.127357	0.43	0.318	0.00487135
Ctcf	0.0282423	0.127297	0.93	0.908	0.0342189
Rtcb	0.00513093	0.12725	0.814	0.767	0.00948248
Cirbp	0.00621742	0.127203	0.749	0.626	0.0108065
Gins2	0.031794	0.1272	0.69	0.604	0.0375658
Eif3d	0.00496449	0.127118	0.93	0.883	0.00925296
Ier5	0.0388282	0.127039	0.708	0.633	0.0444331
Bcap31	0.00433955	0.126978	0.89	0.859	0.00835363
Cped1	0.0056872	0.126948	0.492	0.391	0.0102195
Cnn3	0.00546681	0.126902	0.92	0.879	0.00993517
Chchd4	0.00342048	0.126899	0.518	0.42	0.00692796
Timm17b	0.00455707	0.126798	0.87	0.811	0.00864069
Hnrnpa1	0.00599811	0.126707	1	0.998	0.0105934
Igfbp3	0.102377	0.126705	0.5	0.522	0.106384
Cmpk1	0.00920145	0.126678	0.778	0.733	0.014687
Dcaf13	0.00201395	0.126645	0.505	0.413	0.00453528
Dbnl	0.005084	0.126635	0.655	0.568	0.00943359
Tmem14c	0.0173455	0.126617	0.845	0.784	0.0236034
Pdcd5	0.00331885	0.1266	0.975	0.976	0.00677707
Atp5c1	0.000389876	0.126579	0.997	0.993	0.00120896
Fscn1	0.00722261	0.126524	0.818	0.748	0.0121323
Plod3	0.00275451	0.126521	0.51	0.422	0.00585668
Eny2	0.00320863	0.126519	0.97	0.961	0.00663698
Iffo2	0.00763931	0.126498	0.353	0.262	0.0126672
Gcat	0.00625343	0.126404	0.39	0.24	0.0108475
Wdr45b	0.00536837	0.126205	0.726	0.646	0.00978708
Lsm8	0.0100201	0.126131	0.924	0.886	0.0155656
Galnt1	0.00515074	0.12605	0.614	0.534	0.00950634
Mcl1	0.0102859	0.126035	0.907	0.869	0.0157703
Gspt1	0.0126657	0.125924	0.915	0.886	0.0185979
Fam96a	0.00515469	0.125717	0.804	0.714	0.00950634
Denr	0.00500681	0.125629	0.932	0.874	0.00931203
Asf1b	0.0079759	0.125539	0.522	0.42	0.0130718
Bnip2	0.00804834	0.1254	0.801	0.728	0.0131663
Hddc2	0.00619595	0.125337	0.691	0.568	0.0107906
Hint1	0.000116929	0.125314	0.999	0.995	0.000442462
Cdc42	0.00526638	0.125299	0.996	0.99	0.00967159
Bzw2	0.00924401	0.125286	0.897	0.876	0.0147098
Ube2j2	0.00438983	0.125259	0.709	0.643	0.00840585
Mad2l1	0.0128395	0.125211	0.646	0.566	0.0187927
Phf14	0.00403043	0.125195	0.854	0.75	0.00792516
Spdl1	0.0206966	0.125188	0.446	0.362	0.0269837
Cs	0.00329481	0.125161	0.616	0.478	0.00675147
Yy1	0.0102885	0.125119	0.854	0.796	0.0157703
Dnajc15	0.00634724	0.125102	0.72	0.655	0.010956
Nudt1	0.00255104	0.125071	0.513	0.4	0.00549743
Psmg2	0.00698288	0.125029	0.7	0.624	0.0118317
Uri1	0.00588206	0.124981	0.627	0.524	0.0104411
Crtap	0.00776755	0.12491	0.721	0.653	0.0128384
Gpx7	0.00596253	0.124894	0.64	0.541	0.0105519
Ccz1	0.00319676	0.124816	0.579	0.493	0.0066293
Mtpn	0.00670496	0.124802	0.766	0.692	0.0114606
Fzd2	0.0352714	0.124761	0.797	0.752	0.0408971
Cnpy3	0.00378116	0.124712	0.537	0.471	0.0075194
Dnph1	0.00338837	0.124711	0.468	0.362	0.00687358
Rcn2	0.00623656	0.124703	0.889	0.83	0.010829
Epc1	0.00421374	0.12469	0.456	0.34	0.00819735
Hoxd10	0.00754341	0.124661	0.53	0.42	0.0125271
Bub1b	0.0807968	0.124584	0.516	0.481	0.0847133
Bcat2	0.00320263	0.124572	0.459	0.359	0.0066324
Eif4e2	0.00509371	0.124572	0.932	0.881	0.00943359
Jagn1	0.00452646	0.124559	0.562	0.456	0.00861059
Txnip	0.00724122	0.124533	0.494	0.381	0.0121372
Nudcd2	0.0142346	0.124511	0.867	0.84	0.0202922
Smn1	0.00579832	0.12445	0.664	0.551	0.0103343
Trip13	0.0132942	0.12445	0.638	0.566	0.0192797
Ccm2	0.00329235	0.124446	0.601	0.488	0.00675147
Ndufs6	0.00667714	0.124405	0.919	0.876	0.0114242
Hist1h1b	0.379218	0.124402	0.771	0.733	0.381176
Gde1	0.00455509	0.124351	0.587	0.498	0.00864069
Pgrmc1	0.0242268	0.124334	0.844	0.813	0.0303615
Mark3	0.00612744	0.124333	0.673	0.602	0.0107032
Rae1	0.00451292	0.124252	0.712	0.617	0.00859417
Ndufc1	0.00689955	0.124245	0.96	0.951	0.0117132
Tomm20	0.00607789	0.124135	0.974	0.954	0.0106698
Zranb2	0.0193129	0.124043	0.929	0.9	0.0257505
Zc3h13	0.0125819	0.123938	0.868	0.786	0.0185084
Anp32a	0.00343471	0.123929	0.991	0.983	0.00694874
Mrpl43	0.00522921	0.123889	0.822	0.75	0.0096235
Zfp326	0.010461	0.123851	0.836	0.784	0.0159397
Hat1	0.0238602	0.12385	0.791	0.755	0.0299878
Emd	0.00541065	0.123842	0.765	0.697	0.00984368
Pin4	0.00585529	0.123837	0.778	0.667	0.0104041
Stard3nl	0.00576474	0.123732	0.651	0.585	0.0103165
Rnf10	0.00635789	0.123713	0.756	0.718	0.0109636
Sox11	0.0105325	0.123635	0.637	0.551	0.0160182
Lamtor1	0.00825364	0.123593	0.928	0.893	0.0134495
Taf11	0.00505769	0.123562	0.713	0.636	0.00939668
Cops5	0.0072506	0.123529	0.885	0.83	0.0121372
Ap2m1	0.00826008	0.1235	0.916	0.871	0.0134495
Ddx6	0.013816	0.123467	0.742	0.68	0.0198732
Gamt	0.00565504	0.123389	0.544	0.434	0.010193
Ptms	0.0365779	0.123365	0.997	0.99	0.0422721
Ptk7	0.0080486	0.123299	0.63	0.527	0.0131663
Calm2	0.0424392	0.123293	0.996	0.995	0.0479699
Ip6k2	0.00428976	0.123223	0.472	0.4	0.00829543
Ptpn2	0.00528603	0.123223	0.575	0.51	0.00969694
Akt1s1	0.00446871	0.123153	0.685	0.563	0.00854217
Ube2f	0.0046567	0.123136	0.535	0.447	0.00878207
Nde1	0.112213	0.123116	0.707	0.667	0.116055
Meaf6	0.00417967	0.12307	0.609	0.539	0.00814972
9530068E07Rik	0.00723072	0.123038	0.764	0.67	0.0121343
Mrps22	0.00338113	0.122962	0.556	0.451	0.00687358
Odf2	0.0108982	0.122871	0.484	0.425	0.0163894
Ap3s1	0.00609253	0.122798	0.676	0.621	0.0106741
Pkm	0.0761446	0.122734	0.991	0.998	0.0803647
Gfer	0.00447653	0.122713	0.68	0.583	0.00854217
Acat2	0.00957249	0.122526	0.404	0.32	0.01513
Clk1	0.0262764	0.122456	0.801	0.779	0.0323515
Phgdh	0.0306649	0.122453	0.69	0.602	0.0365227
Iws1	0.0163412	0.122448	0.664	0.575	0.022554
Gar1	0.031798	0.122364	0.782	0.733	0.0375658
Mapkapk2	0.00728309	0.122282	0.669	0.58	0.0121524
Hist1h4h	0.116343	0.122203	0.421	0.393	0.120181
Urod	0.0048349	0.122148	0.621	0.539	0.00909854
Gmpr2	0.00369663	0.122099	0.491	0.386	0.00737643
Rab14	0.0194803	0.12208	0.961	0.954	0.0258949
Spc25	0.251794	0.122042	0.809	0.779	0.255291
Ppwd1	0.00567566	0.121949	0.642	0.546	0.0102195
Uck2	0.0048933	0.121907	0.521	0.456	0.00914948
Krcc1	0.0219452	0.121875	0.683	0.626	0.0281671
Chmp4b	0.011949	0.121685	0.881	0.845	0.0177563
Unc50	0.00448074	0.121666	0.637	0.549	0.00854217
5430416N02Rik	0.0109115	0.121548	0.339	0.233	0.0163953
Anapc16	0.00727013	0.121506	0.696	0.617	0.0121423
Dusp11	0.00715342	0.121494	0.643	0.551	0.0120508
Pex13	0.00351627	0.121461	0.566	0.449	0.00708104
Impdh2	0.006823	0.121431	0.932	0.925	0.0115945
H3f3a	1.36e-05	0.121429	1	1	7.42e-05
Prdx4	0.0317463	0.121357	0.977	0.968	0.0375554
Cdv3	0.010119	0.121299	0.937	0.913	0.0156198
mt-Co3	0.0065264	0.121267	0.997	1	0.0112211
Wars	0.00919214	0.121253	0.366	0.252	0.014687
Nucks1	0.177464	0.121237	0.99	0.99	0.181399
Nup37	0.0177973	0.121159	0.567	0.442	0.0240593
Ppan	0.00990174	0.121145	0.492	0.417	0.0154401
Vamp8	0.00691325	0.12114	0.594	0.505	0.0117251
Dhrs4	0.00969428	0.121072	0.773	0.723	0.0152113
Dpm2	0.00387246	0.121042	0.516	0.417	0.0076575
Eef1g	0.000373629	0.121021	0.999	0.993	0.00117102
Tmtc4	0.0396804	0.120937	0.306	0.245	0.045231
Nsmce1	0.0134818	0.120932	0.902	0.864	0.0194886
Usf1	0.00409803	0.120899	0.472	0.374	0.00802207
Uqcrfs1	0.013025	0.120826	0.882	0.85	0.0189971
Reep5	0.0143881	0.120801	0.932	0.908	0.0204776
Hmmr	0.246296	0.120788	0.632	0.595	0.250006
Ttc4	0.00529125	0.12073	0.556	0.454	0.00969694
Ndufb9	0.00226059	0.120702	0.984	0.985	0.00500071
Psmd5	0.00439004	0.120617	0.548	0.456	0.00840585
Gmps	0.00905717	0.120598	0.848	0.794	0.0145407
Ccnd1	0.0546723	0.120559	0.641	0.57	0.0593837
Svbp	0.0133043	0.120539	0.828	0.801	0.0192797
Fbn2	0.0484252	0.120513	0.835	0.816	0.0533927
Dnajc25	0.00657678	0.120379	0.41	0.318	0.0112855
Nab2	0.0163069	0.120364	0.623	0.534	0.0225313
Otulin	0.00429849	0.120329	0.486	0.396	0.00830314
Mcfd2	0.00459777	0.120163	0.468	0.376	0.00868964
Pop4	0.00631935	0.120113	0.47	0.376	0.0109294
Eif2s3x	0.00437009	0.12001	0.525	0.396	0.00838597
Syce2	0.0186056	0.11995	0.739	0.641	0.0249252
Prim1	0.0281784	0.119936	0.68	0.578	0.0341887
Cby1	0.00631121	0.11983	0.641	0.561	0.0109294
Cox7b	0.0060366	0.119823	0.973	0.968	0.0106245
Hnrnpd	0.03978	0.119806	0.997	0.993	0.0453151
Depdc1a	0.0722405	0.119722	0.492	0.449	0.0765671
Jtb	0.00526311	0.119677	0.553	0.485	0.00967159
Pmpcb	0.00836939	0.119675	0.792	0.738	0.0135896
Fam83d	0.124313	0.119521	0.288	0.216	0.128115
Dctn4	0.010424	0.119445	0.699	0.631	0.0159084
Gpr180	0.0123627	0.119415	0.478	0.391	0.0182545
Cnot8	0.00417274	0.119396	0.474	0.383	0.00814972
2900097C17Rik	0.0096981	0.119294	0.659	0.614	0.0152113
Cks2	0.423689	0.119274	0.895	0.852	0.424902
Snrnp200	0.0100979	0.119141	0.547	0.466	0.0156198
Psmd12	0.01004	0.11913	0.938	0.91	0.0155802
Pdap1	0.00823708	0.119073	0.99	0.981	0.013437
Slc25a39	0.0102771	0.119063	0.72	0.663	0.0157703
Nup93	0.00631912	0.119045	0.514	0.425	0.0109294
E2f4	0.00510185	0.11904	0.474	0.371	0.0094387
Pmp22	0.0627566	0.119017	0.624	0.59	0.0673298
Elovl1	0.00549932	0.118998	0.428	0.33	0.00996361
Tor1aip1	0.00677772	0.118993	0.518	0.393	0.0115337
Polr2h	0.00868851	0.118952	0.66	0.578	0.0140297
Glrx3	0.00569645	0.118931	0.979	0.973	0.0102256
Mmadhc	0.00579701	0.118886	0.624	0.524	0.0103343
Nfyc	0.00577116	0.118776	0.465	0.371	0.0103174
Ndufs8	0.0145306	0.118767	0.89	0.84	0.0206134
Sumo1	0.00853487	0.118766	0.978	0.956	0.0138199
Azin1	0.00833009	0.118748	0.439	0.367	0.0135383
Ipo5	0.0138836	0.118644	0.638	0.602	0.0199215
Shcbp1	0.0567443	0.118613	0.694	0.6	0.0613679
Rwdd4a	0.00673009	0.118593	0.407	0.32	0.0114811
Snf8	0.00966475	0.118544	0.797	0.716	0.0151999
B9d1	0.00558734	0.118488	0.505	0.376	0.0101022
Polr2e	0.0101411	0.118472	0.917	0.886	0.0156401
Actl6a	0.0177598	0.118461	0.849	0.803	0.0240271
Snrpa	0.0172783	0.118379	0.891	0.835	0.023576
Nelfe	0.0133951	0.118279	0.755	0.699	0.0193792
Ddx56	0.00494022	0.118254	0.488	0.388	0.00922736
Rrm1	0.0426162	0.11821	0.82	0.718	0.0481311
Hnrnpab	0.0161572	0.118159	0.991	0.983	0.0223774
Luc7l2	0.0217819	0.118122	0.941	0.925	0.0279985
Cdc45	0.0148033	0.118068	0.477	0.388	0.0209157
Cdca4	0.014675	0.11805	0.517	0.432	0.0207833
2310011J03Rik	0.00496015	0.11793	0.484	0.388	0.00925296
Ctbp1	0.0112367	0.117928	0.89	0.833	0.0167974
Srp72	0.0126746	0.117919	0.88	0.825	0.0185979
Ppie	0.00973375	0.117809	0.673	0.607	0.0152502
Mrpl4	0.0101056	0.1178	0.691	0.614	0.0156198
Phax	0.0121999	0.117782	0.828	0.748	0.0180678
Dimt1	0.0097403	0.117774	0.451	0.369	0.0152502
Ghr	0.00999521	0.117731	0.578	0.502	0.0155656
Trappc2l	0.00765337	0.1177	0.704	0.614	0.0126736
Ptp4a2	0.0142253	0.117658	0.891	0.835	0.0202922
Pycrl	0.00958253	0.117647	0.652	0.573	0.01513
Cxxc1	0.00584054	0.117593	0.565	0.454	0.0103885
Lars	0.0161023	0.117571	0.632	0.57	0.0223367
Stt3a	0.010261	0.117546	0.545	0.502	0.0157703
Tmem132a	0.00867249	0.117528	0.377	0.252	0.0140168
Sltm	0.0386486	0.117514	0.795	0.76	0.0442854
Timm13	0.00910798	0.117511	0.959	0.934	0.0145861
Plrg1	0.00649541	0.117479	0.522	0.396	0.0111787
Ftl1	0.00186486	0.117344	1	1	0.00426532
Lyar	0.0199998	0.117283	0.895	0.85	0.0263573
Rest	0.0187399	0.117245	0.867	0.82	0.0250438
Mgst1	0.0252969	0.117119	0.464	0.379	0.0314551
Bora	0.100502	0.117091	0.534	0.447	0.10456
Eif3b	0.0218842	0.117072	0.764	0.692	0.0281093
Riok1	0.0105026	0.117059	0.645	0.595	0.0159866
Fam111a	0.0734533	0.117051	0.645	0.556	0.0776646
Atf4	0.0161733	0.117012	0.791	0.697	0.022382
Lockd	0.220452	0.117012	0.659	0.587	0.224032
Rad23b	0.00959441	0.117009	0.729	0.65	0.01513
Supt4a	0.0106624	0.116995	0.836	0.75	0.0161442
Scarf2	0.0132639	0.116982	0.651	0.578	0.019253
Med4	0.0108561	0.116946	0.751	0.692	0.0163542
Atf5	0.0120538	0.116941	0.398	0.308	0.0178969
Srek1	0.0173523	0.116902	0.858	0.83	0.0236034
Sumo2	0.00264307	0.116842	0.996	0.995	0.00566095
Mrpl13	0.0170741	0.116783	0.895	0.847	0.0233701
Pja1	0.0166194	0.11676	0.797	0.782	0.022855
Dbr1	0.065179	0.116666	0.26	0.163	0.0695878
Nup35	0.00737101	0.116484	0.413	0.328	0.0122757
Tmem267	0.26009	0.116433	0.193	0.085	0.263397
Traf2	0.0232466	0.11636	0.32	0.214	0.0294491
Rpl37	3.13e-09	0.11635	0.999	1	4.9e-08
Mak16	0.00851107	0.116347	0.5	0.415	0.0137941
Nae1	0.0109552	0.116339	0.652	0.575	0.0164328
2410089E03Rik	0.0137051	0.116272	0.354	0.24	0.0197786
Snx6	0.0153024	0.116257	0.885	0.828	0.021465
Immt	0.0221386	0.116241	0.893	0.85	0.028353
Prpf38b	0.0469946	0.116194	0.815	0.755	0.0520446
Polr2l	0.00602662	0.116155	0.474	0.383	0.0106245
Sdhaf1	0.00785201	0.116133	0.535	0.476	0.0129171
Tnfaip1	0.00766444	0.116087	0.593	0.495	0.01268
Snx17	0.0173367	0.116078	0.81	0.738	0.0236034
Rbck1	0.00633882	0.116057	0.572	0.447	0.0109523
Chaf1b	0.0604973	0.116039	0.466	0.41	0.0651052
Zc3h15	0.0233037	0.116027	0.961	0.956	0.0294788
Ldlr	0.369726	0.115987	0.159	0.095	0.372062
Zrsr2	0.0184444	0.115973	0.822	0.733	0.0247432
Ankrd26	0.0140808	0.115933	0.388	0.291	0.0201056
Ndufb10	0.0129051	0.115913	0.972	0.949	0.0188571
Ublcp1	0.0104627	0.115874	0.584	0.512	0.0159397
Msmo1	0.159109	0.115828	0.221	0.158	0.163208
Fnta	0.0122891	0.115827	0.743	0.716	0.0181846
Tpx2	0.337422	0.115757	0.721	0.697	0.339945
Slco3a1	0.0534178	0.115753	0.305	0.274	0.0582377
Srpr	0.015646	0.115735	0.765	0.675	0.0218591
Lypd1	0.392548	0.115728	0.152	0.07	0.394349
Sh3glb1	0.0439531	0.115718	0.937	0.917	0.0494261
Grpel1	0.013877	0.115651	0.863	0.799	0.0199215
Tmbim6	0.0232321	0.115645	0.942	0.91	0.0294491
Zfp266	0.0111563	0.115639	0.707	0.636	0.0167027
Asf1a	0.016063	0.115628	0.8	0.767	0.0222999
Txnrd1	0.00921597	0.115599	0.623	0.522	0.0146919
Ier3ip1	0.0140414	0.115599	0.855	0.811	0.020082
Mis12	0.00790114	0.115586	0.488	0.388	0.0129736
Ifrd2	0.00960719	0.115574	0.406	0.303	0.0151365
Glod4	0.010743	0.115569	0.694	0.619	0.0162116
Hmgcl	0.00721078	0.115555	0.475	0.364	0.0121241
Rbms1	0.0233738	0.115513	0.848	0.806	0.0295386
Hist1h2bb	0.217381	0.115433	0.203	0.117	0.22104
Mrpl30	0.0144308	0.11538	0.889	0.857	0.020505
Vamp7	0.0111151	0.115356	0.388	0.294	0.0166583
Bub1	0.0675952	0.115349	0.583	0.544	0.0717738
Uba2	0.0258755	0.115285	0.907	0.879	0.03201
Sf3b4	0.0106707	0.115271	0.743	0.648	0.0161442
Mtdh	0.0227043	0.11526	0.966	0.951	0.0289084
Timm10	0.00948297	0.115205	0.517	0.447	0.0150354
Prpf38a	0.0121473	0.115111	0.733	0.638	0.0180051
Cuedc2	0.0173144	0.11507	0.846	0.789	0.0236034
Hras	0.0140016	0.115064	0.86	0.811	0.0200416
Dph3	0.0335034	0.11506	0.745	0.675	0.0391385
Gps1	0.0264783	0.115029	0.868	0.83	0.0325543
Ormdl3	0.00704854	0.115022	0.488	0.422	0.0119084
Rpl37a	1.17e-08	0.115	1	1	1.58e-07
Ythdf1	0.0097547	0.114974	0.58	0.495	0.0152591
Phf23	0.00781377	0.114967	0.5	0.391	0.0128878
Prkd3	0.0123676	0.114967	0.495	0.417	0.0182545
Rbbp7	0.0225444	0.114926	0.974	0.944	0.0287256
Swi5	0.00907136	0.114902	0.99	0.985	0.0145407
Napa	0.0136229	0.114836	0.783	0.684	0.0196763
Hmces	0.0139965	0.114816	0.363	0.257	0.0200416
Purb	0.0289558	0.114811	0.979	0.985	0.0349866
Idh2	0.0138	0.11474	0.99	0.995	0.0198666
Naa10	0.0151377	0.114717	0.758	0.689	0.0213193
Brd1	0.0156976	0.114675	0.742	0.638	0.0218966
Proser1	0.00764223	0.11459	0.45	0.335	0.0126672
Spout1	0.00643891	0.114361	0.501	0.413	0.0110924
Ly6h	0.0873902	0.114356	0.304	0.279	0.0912441
Rbm17	0.0156582	0.114316	0.823	0.765	0.0218591
Prpsap1	0.0197375	0.114294	0.713	0.655	0.0260982
Arid2	0.0131828	0.114282	0.466	0.41	0.0191829
Rps19bp1	0.0111637	0.114253	0.685	0.58	0.0167027
Cox7a2	0.0124463	0.114194	0.99	0.978	0.0183398
Socs6	0.0198839	0.114081	0.335	0.238	0.0262521
Ing4	0.0113421	0.114076	0.683	0.592	0.0169262
Tgfbi	0.183736	0.113996	0.851	0.811	0.18759
Gsn	0.116409	0.113932	0.762	0.716	0.120181
Lrr1	0.0327998	0.113846	0.337	0.245	0.0385414
Ncl	0.0826384	0.113817	0.999	0.993	0.086489
Dlst	0.0108693	0.113792	0.624	0.553	0.0163599
Ndufv2	0.0144605	0.113762	0.965	0.956	0.0205307
Kctd20	0.00914695	0.113684	0.442	0.342	0.0146351
Myg1	0.00990565	0.113643	0.637	0.546	0.0154401
Hnrnph1	0.0412516	0.113624	0.915	0.91	0.0467483
Ssbp4	0.0396333	0.113578	0.904	0.898	0.0452067
Phf3	0.020506	0.113557	0.811	0.714	0.0268709
Mis18bp1	0.209473	0.113533	0.545	0.527	0.213122
Lrig3	0.014686	0.113484	0.417	0.333	0.0207833
Mphosph10	0.0187791	0.113477	0.642	0.568	0.0250607
Cdipt	0.0112846	0.113353	0.381	0.286	0.0168548
Twf2	0.00791976	0.113323	0.455	0.371	0.012992
Miip	0.0491453	0.113184	0.298	0.211	0.0540505
Tagln2	0.0526632	0.113148	0.935	0.942	0.0575224
Atp5f1	0.00702269	0.113106	0.994	0.99	0.0118877
Mesd	0.0155461	0.113063	0.756	0.658	0.0217546
Atp6v0d1	0.010176	0.112989	0.656	0.57	0.0156664
Zfp422	0.0130063	0.112969	0.665	0.578	0.0189891
Fblim1	0.0324123	0.11295	0.603	0.558	0.0381372
Dad1	0.0152927	0.11293	0.981	0.981	0.021465
Rbbp4	0.0378289	0.112873	0.96	0.92	0.0435019
Eef1d	0.0109267	0.112808	0.995	0.993	0.0164041
Rsu1	0.0362627	0.112804	0.868	0.818	0.0419355
Clns1a	0.0213618	0.112776	0.835	0.772	0.0275544
Rbfox2	0.0216287	0.11277	0.811	0.726	0.0278424
Prelid3b	0.0204964	0.112762	0.615	0.578	0.0268709
Mta2	0.0100217	0.112741	0.611	0.502	0.0155656
Tram1	0.0103545	0.112723	0.492	0.371	0.0158299
Eif3l	0.0138441	0.112723	0.908	0.869	0.0198973
Sod1	0.027058	0.112707	0.804	0.76	0.0331507
Rnf4	0.00893038	0.112693	0.589	0.466	0.0143805
Obsl1	0.00743295	0.112667	0.496	0.383	0.0123671
Xbp1	0.0495949	0.112598	0.734	0.701	0.0544425
Rnaseh2c	0.045994	0.112567	0.946	0.947	0.0511629
H2afy2	0.0269623	0.112534	0.894	0.876	0.033103
Mrpl21	0.0211353	0.11251	0.837	0.779	0.027389
Tead2	0.0211514	0.11251	0.858	0.803	0.027389
Parva	0.021052	0.112446	0.826	0.765	0.0273208
Pnisr	0.031314	0.112388	0.921	0.893	0.0372048
Pcolce	0.0709372	0.112384	0.765	0.709	0.0752312
Uqcr11	0.00980577	0.112341	0.979	0.956	0.0153117
Dcun1d5	0.0222022	0.112338	0.867	0.818	0.0283928
Atg3	0.00958713	0.112333	0.585	0.51	0.01513
Lsm12	0.0230012	0.112273	0.916	0.874	0.0292227
Ptcd2	0.00895864	0.112235	0.483	0.379	0.0144128
Chmp6	0.0132522	0.112173	0.599	0.522	0.0192519
Lmo4	0.0378655	0.112129	0.755	0.723	0.0435019
Acin1	0.0196397	0.112036	0.904	0.859	0.0260458
Ahcy	0.133477	0.111991	0.238	0.138	0.137318
Selenom	0.0488003	0.111986	0.941	0.939	0.0537386
Eed	0.0137501	0.111956	0.519	0.437	0.0198272
Rgs7bp	0.589501	0.111949	0.11	0.032	0.589501
Etv4	0.0827697	0.111934	0.267	0.211	0.0865747
Gon4l	0.0152481	0.111911	0.66	0.585	0.0214232
Micu1	0.0151101	0.11187	0.532	0.456	0.0212976
Brd3	0.046208	0.111803	0.854	0.825	0.0513357
Uba5	0.0127938	0.111794	0.672	0.573	0.0187415
Sdha	0.020121	0.11174	0.875	0.818	0.0264726
Larp7	0.0474264	0.111716	0.871	0.789	0.0523904
Stau1	0.00897936	0.111693	0.479	0.379	0.0144329
Dtymk	0.057994	0.111668	0.937	0.913	0.0626035
Tspan31	0.0199743	0.111658	0.698	0.624	0.0263517
Nosip	0.0102718	0.111628	0.439	0.333	0.0157703
2022-03-07	0.0186767	0.111609	0.695	0.607	0.0249974
Mrps18a	0.015626	0.111543	0.73	0.67	0.021849
Hoxb2	0.0209118	0.111525	0.516	0.461	0.0271993
Pdzd11	0.0181422	0.111508	0.66	0.575	0.0244125
Tmod3	0.0457371	0.111389	0.818	0.784	0.0509094
Borcs8	0.0133607	0.111389	0.461	0.381	0.0193455
Eif6	0.0201265	0.111389	0.836	0.786	0.0264726
Map1s	0.0193934	0.111301	0.35	0.265	0.0257989
Ufc1	0.0196533	0.111237	0.87	0.82	0.0260458
Mrps18c	0.0172711	0.111134	0.753	0.655	0.023576
Tpst1	0.014749	0.111106	0.525	0.43	0.0208557
Tsnax	0.0153305	0.111104	0.714	0.609	0.0214873
Zfp553	0.0106077	0.111073	0.444	0.369	0.0160906
Sccpdh	0.0123989	0.11102	0.505	0.422	0.0182853
Phrf1	0.0106844	0.111002	0.461	0.367	0.0161511
Smim19	0.0126474	0.110953	0.508	0.408	0.0185891
Cldn11	0.205109	0.110881	0.269	0.235	0.208925
Rrp1	0.019364	0.110877	0.961	0.908	0.0257794
Myl12b	0.0275505	0.110804	0.943	0.915	0.0335664
Pcnp	0.0295113	0.110765	0.769	0.721	0.0354378
Mettl9	0.0317213	0.110762	0.97	0.973	0.0375511
Rpa2	0.0801173	0.110746	0.678	0.619	0.084152
Fam192a	0.0107211	0.110538	0.526	0.464	0.0161925
Abhd8	0.0164736	0.110532	0.578	0.495	0.0226901
Lsm2	0.0252874	0.110527	0.943	0.922	0.0314551
Atp5d	0.00516081	0.110523	0.994	0.998	0.00950762
Magohb	0.0139754	0.110516	0.621	0.568	0.0200367
Pcbp4	0.0166373	0.110501	0.652	0.587	0.0228616
Lman1	0.0215071	0.110449	0.91	0.886	0.0277062
Klhdc10	0.0236859	0.11043	0.559	0.507	0.029833
Ebpl	0.0146607	0.110397	0.672	0.578	0.0207812
Aven	0.0101059	0.110369	0.512	0.422	0.0156198
Rwdd1	0.0238555	0.110175	0.95	0.932	0.0299878
Zfp846	0.072586	0.110157	0.274	0.192	0.0768867
Bud23	0.0166653	0.110034	0.694	0.607	0.0228821
Bloc1s1	0.0121042	0.110032	0.444	0.333	0.0179565
Gnas	0.00709316	0.109966	1	0.995	0.0119723
Umps	0.0210273	0.109933	0.589	0.546	0.0273158
Trappc4	0.0258683	0.109928	0.773	0.723	0.03201
Adgrl2	0.115098	0.109905	0.565	0.563	0.118969
Tiparp	0.0801955	0.109733	0.287	0.204	0.0841632
Zfp36l1	0.10389	0.109731	0.916	0.864	0.107829
Cdyl	0.0205588	0.109687	0.379	0.289	0.0269201
Mrps25	0.0207706	0.109647	0.72	0.658	0.0270358
Atg5	0.0115635	0.10964	0.521	0.427	0.0172419
Isy1	0.0123359	0.109629	0.475	0.367	0.0182384
Nudcd3	0.0283428	0.109616	0.712	0.658	0.0343169
Vmp1	0.0206998	0.109599	0.682	0.636	0.0269837
Mad1l1	0.0154704	0.109508	0.411	0.34	0.021666
Trib2	0.0310176	0.109504	0.531	0.434	0.0369177
Aldh2	0.0673601	0.109497	0.942	0.927	0.0716525
Edf1	0.0207352	0.109337	0.968	0.942	0.0270097
Znhit2	0.018077	0.109286	0.364	0.269	0.0243435
Supt16	0.0586554	0.109284	0.904	0.883	0.0632395
Wtap	0.0211452	0.109208	0.63	0.553	0.027389
Yrdc	0.0144113	0.109199	0.402	0.289	0.020494
Ldah	0.0152298	0.109158	0.406	0.313	0.0214232
Tbl3	0.00976474	0.109157	0.446	0.325	0.0152612
Cope	0.0313225	0.109147	0.911	0.898	0.0372048
Snrpd1	0.0284568	0.109084	0.991	0.993	0.0344312
Glrx5	0.0485194	0.109054	0.881	0.84	0.0534629
H2afj	0.0340144	0.109043	0.848	0.803	0.0396231
Cntrl	0.0539461	0.109016	0.453	0.422	0.0587041
Zfpl1	0.0100094	0.108942	0.512	0.4	0.0155656
Mydgf	0.0426366	0.108923	0.774	0.728	0.0481311
Hnrnph2	0.0221279	0.108918	0.721	0.665	0.028353
Tnpo1	0.0116876	0.108917	0.535	0.425	0.0173973
Mrps33	0.029296	0.108915	0.897	0.9	0.0352518
Ezh2	0.0813647	0.108907	0.876	0.862	0.0852577
Snrpe	0.0132409	0.108898	0.988	0.981	0.0192515
Mcu	0.117845	0.10889	0.262	0.165	0.121592
St13	0.0320369	0.108886	0.974	0.956	0.0378226
Brd2	0.0292817	0.108847	0.711	0.665	0.0352518
Hsd17b12	0.0197065	0.108765	0.671	0.57	0.0260769
BC005537	0.0171906	0.108744	0.491	0.432	0.0235031
Psap	0.0260727	0.108659	0.841	0.789	0.032146
Rab34	0.0329439	0.108584	0.801	0.769	0.038633
Clk4	0.0116771	0.108549	0.49	0.393	0.0173964
Tpd52l1	0.144306	0.108465	0.264	0.18	0.148371
Cnot7	0.0118209	0.108358	0.447	0.362	0.0175808
Crcp	0.0323835	0.108294	0.331	0.228	0.0381289
Btbd2	0.0177224	0.108209	0.607	0.517	0.024008
Katna1	0.014982	0.108188	0.45	0.374	0.021151
Adgre5	0.0404756	0.108185	0.323	0.243	0.0459878
Tceal9	0.0167062	0.108164	0.999	0.995	0.0229024
Cisd1	0.0454099	0.108142	0.716	0.672	0.0507063
Ints10	0.0161874	0.108141	0.397	0.291	0.0223839
Nfib	0.0455251	0.108132	0.817	0.731	0.0507986
Fam136a	0.0333857	0.108088	0.642	0.585	0.0390727
Pak1ip1	0.0186086	0.108074	0.686	0.587	0.0249252
Ssb	0.0629425	0.108058	0.99	0.99	0.0674879
Sec23a	0.0130334	0.108043	0.46	0.376	0.0189971
Sfxn2	0.0933274	0.108016	0.273	0.17	0.0972692
Tfg	0.0187813	0.107982	0.681	0.583	0.0250607
Hnrnpa0	0.0492523	0.107879	0.991	0.99	0.0541343
Cript	0.0206948	0.107845	0.724	0.612	0.0269837
Tbrg1	0.0475817	0.107806	0.828	0.789	0.0525287
Coro1b	0.0158671	0.107729	0.64	0.539	0.0220959
Virma	0.0174279	0.107708	0.492	0.425	0.0236879
Ndufs4	0.0311648	0.107593	0.907	0.898	0.0370678
Rab5a	0.0150541	0.107575	0.522	0.434	0.0212357
Usp16	0.0175432	0.107575	0.513	0.43	0.0238261
Ndufa12	0.0244438	0.107447	0.963	0.939	0.030602
Fam103a1	0.0213736	0.107433	0.664	0.57	0.0275544
Bhlhb9	0.0143696	0.1074	0.459	0.398	0.0204679
Zfp664	0.0223361	0.107339	0.597	0.532	0.0285225
Psmd13	0.038982	0.107258	0.901	0.883	0.0445509
Snrpb	0.0152369	0.107086	0.988	0.99	0.0214232
Sumo3	0.0468397	0.10705	0.893	0.859	0.0519059
0610010K14Rik	0.0303603	0.106996	0.636	0.551	0.0362586
Msra	0.0383982	0.10697	0.337	0.255	0.0440272
Twistnb	0.0274407	0.106918	0.745	0.694	0.0335258
Glyr1	0.0234416	0.106849	0.691	0.6	0.0295678
E2f6	0.0388905	0.1068	0.309	0.233	0.0444753
Tnfaip8	0.0544549	0.106795	0.641	0.561	0.0591842
Lca5	0.164862	0.106686	0.238	0.146	0.168911
Ndufb6	0.0366373	0.106621	0.933	0.898	0.0423128
Chchd2	0.00732549	0.106599	0.999	1	0.0122115
Bcl7c	0.031439	0.106586	0.95	0.93	0.0372926
Cenph	0.0625198	0.106556	0.634	0.534	0.0671168
Abracl	0.0664063	0.106553	0.907	0.908	0.0707258
Vstm4	0.0644264	0.106518	0.517	0.493	0.0688683
Uhrf1	0.1581	0.106506	0.677	0.575	0.162363
Kcmf1	0.030508	0.106487	0.769	0.718	0.0363606
Gm8186	0.0231602	0.106392	0.645	0.58	0.0293821
Melk	0.0765409	0.106384	0.611	0.534	0.0807343
Ap2s1	0.0292167	0.106377	0.919	0.913	0.0352047
Rbm34	0.019604	0.10635	0.384	0.289	0.0260198
Psrc1	0.158429	0.106262	0.425	0.415	0.162605
Casp6	0.0241893	0.106215	0.566	0.473	0.0303362
Unc5c	0.0258894	0.106167	0.437	0.34	0.03201
Stk16	0.0338751	0.106157	0.687	0.655	0.0394871
Coq2	0.0163491	0.106129	0.581	0.485	0.022554
Ccnb2	0.538208	0.106068	0.767	0.731	0.538823
Sema3a	0.0561891	0.106045	0.566	0.498	0.0608803
Ndufa3	0.031533	0.105994	0.965	0.947	0.0373788
Znrf1	0.0158909	0.105949	0.473	0.369	0.0220959
Ntmt1	0.0179885	0.105941	0.612	0.519	0.024243
Ndufs2	0.0321216	0.105887	0.969	0.956	0.037897
Psmb7	0.0329283	0.105864	0.901	0.864	0.038633
Mtx2	0.0304805	0.105853	0.85	0.796	0.0363525
Samm50	0.0322129	0.105853	0.854	0.852	0.0379792
Ddah1	0.0294636	0.10584	0.379	0.272	0.0354048
Ube2g2	0.0279643	0.105824	0.351	0.257	0.0339996
Abhd17c	0.0648314	0.105743	0.293	0.182	0.0692589
Cisd2	0.032249	0.105739	0.714	0.653	0.0379961
U2af2	0.0506842	0.105735	0.836	0.801	0.0554645
Mrps31	0.0158846	0.105726	0.488	0.374	0.0220959
Mbnl2	0.0673991	0.10572	0.761	0.718	0.0716525
Rab5c	0.0281371	0.105695	0.736	0.689	0.0341623
Fam92a	0.0324587	0.105667	0.894	0.842	0.0381662
Nifk	0.0237709	0.105658	0.594	0.539	0.0299186
Unc119	0.0164484	0.10564	0.49	0.405	0.0226731
Txn1	0.0387041	0.105585	0.996	1	0.0443199
Nufip1	0.0166979	0.10558	0.43	0.335	0.0229024
Cdca5	0.0583085	0.105553	0.358	0.294	0.0629043
Fyttd1	0.0345588	0.105542	0.722	0.648	0.0402306
Nup88	0.0179354	0.105361	0.451	0.359	0.0242037
Copz2	0.0428505	0.105256	0.767	0.728	0.0483413
Ndufb5	0.0251375	0.105249	0.981	0.983	0.0313013
Ubl4a	0.0330121	0.105227	0.711	0.655	0.038687
Gtf2b	0.0274184	0.105182	0.676	0.643	0.0335221
Mrps16	0.0346677	0.105158	0.891	0.845	0.0402771
Avl9	0.0781886	0.105158	0.293	0.189	0.0823236
Pbk	0.201643	0.105118	0.647	0.57	0.205634
Ctu2	0.0346235	0.105083	0.351	0.279	0.0402771
Rbm10	0.0206549	0.105072	0.578	0.498	0.0269837
Rbm4b	0.0179456	0.105015	0.585	0.478	0.0242037
Ythdf3	0.0224062	0.105014	0.411	0.313	0.0285912
Selenon	0.0176959	0.105	0.518	0.415	0.024008
Ykt6	0.0273649	0.104923	0.351	0.26	0.0334799
Stard3	0.0201871	0.104901	0.402	0.306	0.0265125
Dzip3	0.0257903	0.104886	0.589	0.517	0.0319778
Fam96b	0.0296583	0.104874	0.707	0.65	0.0355657
Fibp	0.0276394	0.104825	0.733	0.66	0.033628
Pdhb	0.0255557	0.104799	0.72	0.604	0.0317543
Tbce	0.0633084	0.104799	0.305	0.226	0.0678335
Naxd	0.0378638	0.10477	0.658	0.619	0.0435019
Tor1a	0.0177205	0.104725	0.525	0.434	0.024008
Rpl14	3.03e-05	0.10469	1	1	0.000143005
Hmgb1	0.107601	0.10468	1	1	0.111483
Nfatc4	0.0212879	0.104608	0.426	0.333	0.0275251
Clspn	0.0783651	0.10459	0.641	0.592	0.0824599
Rtn3	0.033509	0.104487	0.698	0.638	0.0391385
Anapc10	0.0183845	0.104478	0.481	0.415	0.0247007
Hmga1	0.324438	0.104473	0.19	0.1	0.32724
Usp15	0.0244537	0.104458	0.491	0.417	0.030602
Hist2h2ac	0.22488	0.104431	0.484	0.442	0.228399
Zmat2	0.0372125	0.104353	0.877	0.806	0.0428641
Eid2	0.0236348	0.104333	0.66	0.57	0.02979
Ube2q1	0.0231451	0.104322	0.64	0.544	0.0293821
Capns1	0.0405087	0.104271	0.963	0.947	0.0459957
Pank2	0.022443	0.104241	0.532	0.473	0.0286173
Cox19	0.0221316	0.10423	0.603	0.517	0.028353
Ywhag	0.0165766	0.104195	0.54	0.43	0.0228139
Eif4e3	0.0468089	0.104183	0.379	0.284	0.0519046
Naxe	0.0412306	0.104085	0.837	0.767	0.0467483
Tspan6	0.0456629	0.104064	0.718	0.653	0.0508591
Ola1	0.0382822	0.104047	0.726	0.655	0.0439518
Tkt	0.0460424	0.104039	0.959	0.954	0.0511842
Nsrp1	0.047319	0.104036	0.77	0.728	0.0523047
Tmem147	0.0317057	0.103977	0.756	0.667	0.0375511
Tmem97	0.0434597	0.103948	0.58	0.519	0.048934
Traip	0.0566192	0.103946	0.326	0.24	0.0612705
Clptm1	0.0211685	0.10393	0.473	0.381	0.0273909
Med25	0.0193543	0.103894	0.553	0.437	0.0257794
Actn4	0.0802241	0.103894	0.835	0.791	0.0841632
Nradd	0.0248789	0.103893	0.404	0.337	0.0310454
Matn2	0.0403645	0.10386	0.615	0.532	0.0458914
Prdx5	0.0259448	0.103844	0.963	0.93	0.032056
Ccnl2	0.0336749	0.103842	0.744	0.699	0.0393061
Cd248	0.0234016	0.103781	0.503	0.379	0.0295386
Tbc1d10a	0.084182	0.103741	0.289	0.192	0.0879994
Mrpl41	0.0313493	0.10373	0.72	0.67	0.0372114
Rnf215	0.0370193	0.103713	0.354	0.274	0.0426977
Etl4	0.0432299	0.103641	0.614	0.549	0.0487066
Tcf15	0.0476797	0.103635	0.328	0.257	0.0526038
Esf1	0.0785352	0.103561	0.795	0.765	0.0825893
Dscc1	0.0607649	0.103549	0.388	0.316	0.0653129
Abcf2	0.0266959	0.103523	0.612	0.568	0.0327989
Nrk	0.0659859	0.103421	0.34	0.252	0.070393
Zmym5	0.0276191	0.103362	0.51	0.456	0.0336267
Thumpd1	0.0200087	0.103361	0.527	0.437	0.0263573
Prkrip1	0.0182637	0.103354	0.452	0.371	0.0245572
Emc10	0.0442773	0.103353	0.841	0.806	0.0495996
Uba1	0.0383677	0.103298	0.749	0.665	0.0440211
Il6st	0.0240622	0.103236	0.466	0.393	0.0302201
Cfap36	0.0302298	0.103223	0.665	0.58	0.0361272
Dcps	0.0298442	0.103184	0.663	0.597	0.0357243
Mob4	0.039223	0.103109	0.797	0.733	0.0447678
Tmem119	0.0509871	0.103054	0.336	0.262	0.0557612
Suclg1	0.0398354	0.103005	0.913	0.862	0.0453487
Cst3	0.06739	0.102996	0.97	0.947	0.0716525
Rcn1	0.0639259	0.102996	0.963	0.956	0.0683749
Lrpap1	0.0289903	0.102984	0.761	0.701	0.0350042
Gpc3	0.100255	0.102915	0.994	0.99	0.104366
Gsr	0.0593043	0.102849	0.332	0.26	0.0638606
1110008F13Rik	0.0440957	0.102846	0.871	0.813	0.0495228
2610037D02Rik	0.0256299	0.102841	0.439	0.347	0.0318239
Ap2a1	0.0259872	0.102819	0.594	0.51	0.0320635
mt-Atp6	0.0334692	0.102813	0.999	1	0.0391385
Hoxc8	0.0745824	0.102808	0.659	0.587	0.0787633
Nisch	0.0466686	0.10278	0.901	0.825	0.0518146
Cebpg	0.0205823	0.102706	0.523	0.427	0.0269307
Rpl31	0.00885619	0.102583	1	0.995	0.0142742
Larp1	0.0304606	0.102536	0.554	0.478	0.0363525
Fasn	0.0489968	0.102531	0.328	0.25	0.0539211
Snrnp40	0.0442563	0.102515	0.879	0.847	0.0495996
Rpp25l	0.044311	0.102461	0.751	0.67	0.0496057
Ppp2r2a	0.0440419	0.102398	0.806	0.694	0.0494941
Etfa	0.049687	0.102392	0.749	0.682	0.0545095
Ppib	0.0210326	0.102354	0.996	0.993	0.0273158
Rai14	0.0455506	0.102293	0.655	0.597	0.0507986
Coq5	0.0195395	0.102273	0.444	0.333	0.0259539
B4galt3	0.0244916	0.10225	0.406	0.313	0.0306277
Dohh	0.0274798	0.102194	0.563	0.478	0.0335503
S100a10	0.349616	0.102186	0.972	0.951	0.352028
Pwwp2a	0.0246172	0.102173	0.571	0.464	0.0307627
Vkorc1l1	0.0533814	0.102144	0.332	0.248	0.0582343
4921524J17Rik	0.0232803	0.10214	0.576	0.473	0.0294704
Lsm3	0.0590326	0.102121	0.941	0.925	0.063607
1500011K16Rik	0.0825063	0.102115	0.3	0.201	0.0864023
Vps35	0.0424381	0.102097	0.748	0.67	0.0479699
Casp8ap2	0.120074	0.102057	0.68	0.641	0.12382
Nmral1	0.0298518	0.101974	0.575	0.522	0.0357243
Bcl10	0.0398686	0.101972	0.708	0.658	0.045357
Opa3	0.056299	0.101927	0.324	0.243	0.0609616
Tdp2	0.0360548	0.101895	0.614	0.544	0.0417226
Rbm14	0.0411741	0.101886	0.375	0.303	0.0467209
Cul3	0.0676839	0.101768	0.818	0.752	0.0718245
Glt8d1	0.0178905	0.101643	0.513	0.403	0.0241666
Srsf1	0.0504279	0.101634	0.831	0.779	0.0552531
Psip1	0.0767578	0.101605	0.97	0.971	0.0809144
Spsb3	0.0442013	0.101385	0.342	0.24	0.0495788
Tcim	0.263421	0.101285	0.58	0.587	0.266617
Tmpo	0.318769	0.101282	0.964	0.932	0.321707
Rps27l	0.0552696	0.101255	0.984	0.99	0.0599581
Iah1	0.0295495	0.101248	0.624	0.539	0.0354594
Pdxdc1	0.0234015	0.101202	0.556	0.471	0.0295386
Rnf14	0.0250701	0.101171	0.468	0.379	0.0312396
Prmt7	0.0270359	0.101122	0.495	0.437	0.0331469
Tgif1	0.0788207	0.101119	0.304	0.214	0.0828398
Fiz1	0.0294358	0.101114	0.394	0.308	0.0353957
Col23a1	0.399695	0.101104	0.141	0.109	0.401298
Rap1b	0.0733172	0.101049	0.842	0.806	0.0775675
Sh3bgrl3	0.0505768	0.100997	0.935	0.871	0.0553816
Wtip	0.0674756	0.10098	0.866	0.811	0.0716902
Bmpr2	0.0353687	0.100928	0.53	0.425	0.0409827
Gulp1	0.0453704	0.100918	0.349	0.274	0.0506945
Cpa2	0.257967	0.100877	0.22	0.192	0.261399
Cpsf6	0.0633422	0.100837	0.827	0.786	0.0678335
Cers2	0.0297897	0.100835	0.693	0.583	0.0356987
Svopl	0.573219	0.100763	0.124	0.056	0.573546
Ubfd1	0.0241526	0.100758	0.562	0.459	0.0303118
Zfp560	0.0258816	0.100723	0.416	0.335	0.03201
Rpl39	7.16e-05	0.100668	1	1	0.000295749
Gigyf2	0.0300824	0.100664	0.509	0.42	0.0359757
Gna11	0.0449101	0.100626	0.774	0.718	0.0502443
Eif2s2	0.173191	0.100615	0.995	0.985	0.177134
Tmem222	0.0261521	0.100605	0.545	0.49	0.0322211
Ehd1	0.03465	0.1006	0.539	0.466	0.0402771
Ufm1	0.043705	0.1006	0.687	0.602	0.0491787
Trappc1	0.0501798	0.100562	0.755	0.697	0.0550157
Ik	0.052797	0.100551	0.779	0.728	0.0576327
Arpc1a	0.0524731	0.100538	0.906	0.876	0.0573505
Stx5a	0.0352645	0.100533	0.614	0.527	0.0408971
Ccdc86	0.026423	0.100511	0.487	0.413	0.0325092
Golga7	0.0540944	0.100455	0.755	0.67	0.058829
Hist1h2br	0.521066	0.100423	0.147	0.066	0.52196
Setx	0.066071	0.100407	0.345	0.245	0.0704114
Dcun1d1	0.0422631	0.100405	0.363	0.269	0.0478327
Mrps18b	0.0246637	0.100398	0.46	0.393	0.0307988
Setbp1	0.0494094	0.100339	0.435	0.352	0.0542729
Mpzl1	0.0606515	0.100339	0.66	0.614	0.0652311
Gxylt1	0.0431267	0.100278	0.425	0.335	0.0486216
Ddx24	0.0743982	0.10025	0.836	0.782	0.0786162
Epc2	0.0271198	0.100165	0.478	0.405	0.0332033
2610318N02Rik	0.16574	0.100121	0.266	0.187	0.169712
Ttk	0.103647	0.100117	0.456	0.376	0.10764
Ckap2	0.324667	0.100112	0.609	0.549	0.327282
Rrp15	0.0456334	0.100103	0.593	0.546	0.0508586
1700020I14Rik	0.0568482	0.100093	0.713	0.648	0.0614424
Fxn	0.0357054	0.100086	0.556	0.468	0.0413455
Nid1	0.153638	0.100001	0.793	0.745	0.157873
Rab3ip	0.00830642	-0.100953	0.216	0.255	0.0135124
Ednra	0.000384651	-0.10127	0.358	0.415	0.00119487
Fkrp	7.68e-05	-0.102023	0.363	0.432	0.000315211
S100a1	0.00406426	-0.102933	0.199	0.282	0.00797378
Ezr	0.0328583	-0.104536	0.164	0.252	0.0385842
Pgk1	7.95e-09	-0.105847	0.972	0.973	1.11e-07
Atp1b1	0.126399	-0.106453	0.11	0.182	0.130189
Id1	0.00362239	-0.107636	0.783	0.83	0.00724479
Mt1	0.0442021	-0.108715	0.112	0.231	0.0495788
Crebrf	0.101976	-0.10876	0.092	0.192	0.106031
2022-09-04	0.00744048	-0.109542	0.244	0.299	0.0123679
Trappc6a	6.82e-06	-0.110255	0.574	0.641	4.19e-05
Tpm3	1.73e-07	-0.110687	0.893	0.91	1.75e-06
Cebpb	0.000163212	-0.110873	0.468	0.524	0.000585959
Myo6	0.000475088	-0.110887	0.271	0.347	0.00141519
Ccdc141	0.00582642	-0.112875	0.164	0.26	0.0103739
Fxyd2	0.000224165	-0.114052	0.233	0.403	0.00076112
Hmgn3	3.55e-05	-0.114053	0.848	0.896	0.000161601
Plcb1	0.00185306	-0.115529	0.362	0.456	0.00424388
Adm	0.0337725	-0.115963	0.156	0.221	0.0393937
Ecm1	0.000897487	-0.116522	0.822	0.823	0.00238603
Egr1	9.64e-06	-0.119536	0.85	0.891	5.58e-05
Gltp	0.000778801	-0.127119	0.187	0.294	0.00215214
Gm10093	0.0140678	-0.127186	0.134	0.231	0.0201034
Clu	0.303592	-0.129235	0.074	0.107	0.30692
Ankrd37	0.000683978	-0.130032	0.202	0.289	0.00191733
Eif3j2	4.17e-06	-0.139317	0.296	0.417	2.67e-05
Gria4	4.11e-06	-0.140781	0.516	0.566	2.64e-05
Bnip3	7.73e-06	-0.142607	0.296	0.388	4.64e-05
Gucy1b1	9.59e-07	-0.143278	0.66	0.731	7.57e-06
Igfbp2	0.0036067	-0.144872	0.379	0.4	0.00722164
Camk2n1	5.14e-08	-0.145437	0.875	0.93	6.16e-07
Ccdc8	6.82e-07	-0.147929	0.264	0.417	5.64e-06
Rps18	1.88e-63	-0.151155	1	1	5.5e-61
Abcc9	3.3e-05	-0.157982	0.24	0.34	0.000152544
Tsix	0.000118494	-0.180512	0.158	0.284	0.000447419
Des	2.96e-06	-0.189669	0.238	0.337	1.99e-05
Slc16a3	5.05e-09	-0.196746	0.349	0.49	7.57e-08
Ndufa4l2	5.11e-05	-0.210791	0.455	0.558	0.000222014
Gucy1a1	5.85e-09	-0.211123	0.875	0.917	8.69e-08
Junb	6.71e-07	-0.211138	0.789	0.842	5.6e-06
Ifitm1	1.07e-11	-0.21321	0.835	0.9	2.72e-10
Fos	1.63e-05	-0.216553	0.774	0.842	8.67e-05
Timp3	1.49e-09	-0.220764	0.793	0.871	2.55e-08
mt-Nd6	3.02e-12	-0.224731	0.482	0.604	8.26e-11
Kcnj8	5.1e-08	-0.238121	0.499	0.653	6.16e-07
Filip1l	3.97e-11	-0.239241	0.504	0.663	9.4e-10
Alad	3.49e-18	-0.263493	0.548	0.684	1.91e-16
Ubc	2.29e-29	-0.288245	0.984	0.983	2.67e-27
Gm10036	3.8e-24	-0.295348	0.446	0.6	3.33e-22
Xist	0.0100969	-0.334158	0.326	0.483	0.0156198
G0s2	7.97e-09	-0.349209	0.544	0.597	1.11e-07
Gm13305	1.11e-24	-0.357974	0.245	0.561	1.02e-22
Rgs5	2e-17	-0.383616	0.486	0.682	1e-15
Fosb	6.66e-12	-0.384257	0.453	0.551	1.74e-10
Rpl29	5.13e-197	-0.392545	0.999	1	8.99e-194
Ppp1r14a	2.67e-17	-0.464216	0.477	0.638	1.27e-15

## Sheet: Cluster2_MutVsCTRL.DEGs
Gene	p_val	avg_logFC	pct.1	pct.2	p_val_adj
Gm10260	3.67e-60	1.31765	0.442	0.02	8.84e-58
Hbb-bs	NA	0.934386	0.118	0.096	NA
Hist1h2ap	1.22e-18	0.92991	0.557	0.337	6.09e-17
Tpm3-rs7	1.57e-70	0.686149	0.691	0.15	4.55e-68
Eif3j1	1.11e-55	0.606285	0.764	0.398	2.29e-53
Uba52	1.01e-87	0.51856	0.973	0.933	7.3e-85
Rbp1	8.89e-19	0.512546	0.776	0.608	4.59e-17
Igfbp5	1.62e-13	0.492663	0.416	0.238	4.25e-12
Hist1h1b	4.11e-05	0.435803	0.281	0.185	0.000146934
Thy1	1.86e-09	0.427029	0.303	0.024	2.26e-08
Erh	1.59e-31	0.410874	0.858	0.734	1.91e-29
Ciapin1	1.57e-23	0.371174	0.705	0.496	1.51e-21
Wdfy1	7.47e-22	0.369088	0.637	0.396	5.41e-20
mt-Nd1	1.73e-33	0.36881	0.982	0.986	2.5e-31
Pclaf	4.06e-06	0.368805	0.401	0.311	1.97e-05
Odc1	3.33e-07	0.367373	0.77	0.685	2.21e-06
Rps2	7.01e-75	0.367289	0.995	0.996	2.53e-72
Nme1	8.57e-14	0.354397	0.87	0.811	2.39e-12
Pdia6	1.98e-22	0.349037	0.974	0.937	1.68e-20
Hmgb2	5.99e-09	0.345291	0.92	0.902	6.43e-08
Srsf2	5.33e-21	0.343425	0.917	0.868	3.67e-19
Ranbp1	2.19e-15	0.341289	0.902	0.852	8.13e-14
Ppp1r14b	3.88e-18	0.338702	0.932	0.909	1.81e-16
Lgals1	5.13e-07	0.334775	0.493	0.35	3.21e-06
Ncl	1.04e-17	0.332905	0.985	0.976	4.72e-16
Hist1h2ae	0.000386089	0.332867	0.337	0.256	0.0010012
Gm10076	7.28e-22	0.331427	0.865	0.748	5.41e-20
Mcm5	1.12e-08	0.329789	0.523	0.368	1.11e-07
Tyms	1.19e-09	0.328845	0.625	0.494	1.54e-08
H2afz	2.27e-12	0.328717	0.985	0.967	5.21e-11
Hmgn2	3.54e-10	0.326759	0.826	0.776	5.45e-09
Stmn1	6.5e-11	0.324108	0.952	0.909	1.13e-09
mt-Cytb	2.6e-29	0.318679	0.994	0.994	2.89e-27
Nasp	5.47e-11	0.31812	0.769	0.636	9.89e-10
Ran	2.2e-14	0.315463	0.979	0.967	7.08e-13
Eif5a	7.61e-17	0.313856	0.973	0.951	3.24e-15
Nhp2	7.33e-12	0.312085	0.802	0.687	1.54e-10
H2-K1	1.17e-08	0.311126	0.407	0.25	1.15e-07
Il11ra1	5.36e-15	0.305974	0.549	0.319	1.85e-13
Fdps	2.31e-10	0.301787	0.516	0.341	3.63e-09
Cldn5	1.91e-09	0.30115	0.947	0.935	2.3e-08
Hmgn3	1.36e-14	0.299947	0.584	0.38	4.58e-13
Mcm3	1.74e-09	0.298903	0.628	0.533	2.17e-08
Srm	1.58e-08	0.298188	0.614	0.5	1.5e-07
Atox1	1.56e-19	0.293559	0.941	0.884	8.38e-18
Tubb4b	7.45e-08	0.293286	0.811	0.722	6.1e-07
H2-D1	5.24e-11	0.29177	0.868	0.799	9.6e-10
mt-Nd4	6.25e-22	0.29002	0.983	0.988	5.02e-20
Hsp90aa1	1.56e-11	0.288553	0.941	0.923	3.14e-10
Snrpf	8.5e-16	0.288413	0.92	0.839	3.24e-14
Lmnb1	1.4e-06	0.286693	0.664	0.608	7.63e-06
Mcm7	1.87e-05	0.285317	0.573	0.478	7.52e-05
Meg3	NA	0.284094	0.198	0.085	NA
Nop58	6.75e-09	0.283558	0.758	0.636	7.13e-08
Tipin	1.65e-08	0.281892	0.501	0.382	1.55e-07
Tubb6	6.85e-07	0.281067	0.48	0.362	4.13e-06
Pebp1	8.52e-21	0.277173	0.958	0.957	5.36e-19
Birc5	0.000541949	0.277116	0.365	0.238	0.00133822
Srsf7	1.07e-10	0.271347	0.865	0.807	1.77e-09
Dctpp1	2.36e-08	0.271197	0.638	0.516	2.16e-07
Lrrc59	8.43e-12	0.271071	0.705	0.618	1.74e-10
Atp5k	4.25e-17	0.269377	0.973	0.967	1.87e-15
Dnmt1	1.17e-07	0.266736	0.505	0.382	9.05e-07
Phb	2.71e-12	0.265898	0.711	0.618	6.02e-11
Srsf3	6.58e-14	0.265868	0.97	0.955	1.91e-12
Ccdc85b	4.71e-13	0.265827	0.873	0.799	1.2e-11
Rsl1d1	3.06e-11	0.261117	0.735	0.632	5.83e-10
Tmsb10	2.33e-23	0.256814	1	0.998	2.1e-21
Spc24	4.98e-05	0.256704	0.346	0.234	0.000172533
Lig1	2.38e-05	0.256273	0.551	0.437	9.18e-05
Gpc3	0.0149134	0.254484	0.231	0.171	0.0203774
Prdx1	5.68e-14	0.253496	0.976	0.974	1.68e-12
Mki67	0.00805489	0.252506	0.256	0.193	0.0123731
Hspd1	3.21e-07	0.252396	0.884	0.809	2.17e-06
Slbp	1.95e-06	0.250117	0.614	0.52	1.01e-05
Cks1b	2.61e-07	0.250078	0.66	0.577	1.84e-06
Calr	5.19e-11	0.249396	0.98	0.965	9.6e-10
Ybx1	1.26e-13	0.249206	0.994	0.988	3.37e-12
Hnrnpa3	7.81e-10	0.249022	0.947	0.925	1.08e-08
Slc25a5	2.01e-09	0.248139	0.947	0.929	2.4e-08
Pbx1	7.55e-09	0.246433	0.958	0.935	7.86e-08
Nucks1	3.21e-07	0.246322	0.746	0.705	2.17e-06
mt-Co3	1.2e-13	0.245734	0.992	0.998	3.27e-12
Tuba1b	3.16e-05	0.245088	0.874	0.823	0.00011819
Snrpg	1.21e-11	0.244709	0.87	0.789	2.47e-10
Tuba1a	2.05e-06	0.24392	0.923	0.9	1.05e-05
Psmc5	1.77e-11	0.24319	0.838	0.776	3.5e-10
Bola2	8.19e-10	0.2427	0.797	0.715	1.11e-08
Set	1.18e-09	0.242316	0.962	0.943	1.53e-08
Rex1bd	1.09e-10	0.241759	0.756	0.675	1.79e-09
Tmem37	1.66e-06	0.240755	0.339	0.201	8.75e-06
Ppa1	4.09e-08	0.239962	0.604	0.492	3.52e-07
Banf1	1.66e-08	0.239741	0.862	0.817	1.55e-07
Eif5	7.68e-10	0.23698	0.923	0.89	1.07e-08
Cox5b	1.72e-14	0.236894	0.961	0.927	5.65e-13
Pa2g4	1.47e-06	0.236305	0.772	0.699	7.92e-06
Prmt1	3.78e-09	0.236195	0.909	0.898	4.17e-08
Sfpq	1.27e-07	0.235617	0.891	0.87	9.72e-07
Gadd45gip1	2.33e-09	0.235353	0.608	0.488	2.76e-08
Hdac1	2.59e-09	0.235353	0.758	0.669	2.98e-08
Ndufc1	2.64e-10	0.235233	0.882	0.843	4.11e-09
Ndufa5	1.34e-10	0.235047	0.877	0.831	2.19e-09
Gmnn	4.43e-05	0.234927	0.44	0.335	0.000157198
Serpinh1	2.81e-14	0.234308	0.982	0.98	8.85e-13
Dlk1	NA	0.233291	0.101	0.037	NA
Nop56	9.2e-08	0.23265	0.737	0.614	7.31e-07
Col3a1	0.0132648	0.23197	0.324	0.167	0.018563
Ppia	4.01e-20	0.231328	0.998	1	2.32e-18
Ptn	0.320466	0.231273	0.316	0.287	0.324049
Dut	3.17e-05	0.231084	0.693	0.642	0.000118198
Lsm2	4.38e-07	0.230959	0.747	0.671	2.78e-06
Timm13	1.77e-09	0.230149	0.867	0.835	2.17e-08
Lsm6	3.55e-08	0.230046	0.722	0.642	3.15e-07
Dcn	NA	0.229001	0.145	0.059	NA
Ahsa1	6.3e-09	0.228048	0.664	0.563	6.71e-08
Anp32b	7.63e-08	0.228022	0.952	0.909	6.2e-07
Ybx3	9.8e-06	0.227853	0.826	0.811	4.3e-05
Snrpd1	9.82e-09	0.227196	0.911	0.866	9.93e-08
Tra2b	6.94e-08	0.226914	0.85	0.821	5.74e-07
Cdk1	0.000480311	0.226556	0.523	0.437	0.00120662
Hspa5	4.87e-06	0.226396	0.964	0.951	2.26e-05
Siva1	6.3e-07	0.226163	0.737	0.652	3.86e-06
Gstp1	1.57e-08	0.226022	0.454	0.291	1.5e-07
Mcm6	2.33e-05	0.225965	0.599	0.488	9.08e-05
Ube2n	3e-09	0.225307	0.852	0.805	3.4e-08
Cct3	2.51e-09	0.225299	0.911	0.839	2.92e-08
mt-Nd3	1.79e-11	0.224593	0.964	0.931	3.5e-10
Arf5	3.86e-14	0.224122	0.973	0.963	1.16e-12
Pkdcc	6.37e-05	0.223449	0.369	0.25	0.000214842
Mcam	3.32e-07	0.223444	0.651	0.573	2.21e-06
Phf5a	1.77e-09	0.223304	0.838	0.754	2.17e-08
Hmgn1	2.86e-07	0.222166	0.927	0.935	1.98e-06
Selenoh	0.000229384	0.221073	0.858	0.843	0.000644502
Mrpl18	3.87e-07	0.220493	0.759	0.705	2.52e-06
G3bp1	7.46e-08	0.219809	0.873	0.823	6.1e-07
Manf	1.52e-06	0.219601	0.829	0.795	8.11e-06
Tomm40	5.62e-08	0.218495	0.75	0.648	4.78e-07
Vcp	7.55e-10	0.218026	0.935	0.907	1.06e-08
Ewsr1	4.09e-08	0.217982	0.834	0.764	3.52e-07
Vdac3	3.11e-09	0.217979	0.902	0.86	3.49e-08
Fkbp1a	2.87e-16	0.217377	0.995	0.988	1.15e-14
Fbl	6.62e-07	0.21736	0.834	0.754	4.04e-06
Hras	1.67e-08	0.217177	0.923	0.911	1.55e-07
Rpa2	0.000368704	0.21638	0.372	0.264	0.000968267
Tcp1	1.1e-08	0.215869	0.888	0.846	1.1e-07
Sdf2l1	3.92e-07	0.215842	0.416	0.297	2.53e-06
Mmp14	9.89e-08	0.215767	0.652	0.502	7.78e-07
Tubb5	1.24e-06	0.21541	0.988	0.99	6.85e-06
Srp19	3.74e-08	0.214952	0.784	0.713	3.26e-07
Orc6	1.16e-06	0.214787	0.48	0.362	6.51e-06
Gins2	0.000359397	0.21473	0.386	0.264	0.000947627
Cycs	2.31e-06	0.213447	0.794	0.715	1.18e-05
Slc9a3r2	9.08e-07	0.213285	0.93	0.927	5.24e-06
Dnajc9	3.22e-05	0.213254	0.508	0.388	0.000119915
H2afx	0.000139393	0.211983	0.592	0.508	0.000420213
Cnbp	7.01e-07	0.21173	0.927	0.915	4.21e-06
Hnrnpu	2.35e-07	0.210831	0.943	0.921	1.69e-06
Metap2	8.18e-09	0.210133	0.938	0.915	8.45e-08
1110008F13Rik	6.83e-08	0.209515	0.841	0.748	5.69e-07
Rbm3	9.06e-08	0.209216	0.961	0.961	7.24e-07
Ssrp1	5.86e-06	0.209208	0.782	0.732	2.67e-05
Dkc1	8.34e-06	0.209111	0.604	0.506	3.7e-05
Gar1	4.6e-07	0.208501	0.629	0.524	2.91e-06
Srsf6	1.1e-07	0.208295	0.75	0.663	8.58e-07
Col1a1	0.0453392	0.208223	0.31	0.177	0.0503885
Chaf1b	4.85e-05	0.207828	0.401	0.266	0.000168583
Ppp1ca	3.88e-11	0.20763	0.976	0.961	7.29e-10
Sh3bgrl3	5.91e-10	0.207189	0.964	0.957	8.46e-09
Fam96a	1.28e-07	0.206988	0.714	0.602	9.76e-07
Usp50	1.92e-07	0.206511	0.463	0.299	1.41e-06
Cdv3	1.74e-07	0.206236	0.876	0.778	1.3e-06
Dnaja1	3.9e-10	0.204845	0.973	0.967	5.76e-09
Ddx18	8.08e-07	0.204278	0.663	0.569	4.81e-06
Hmgb3	7.04e-06	0.204175	0.8	0.742	3.14e-05
Trim28	2.14e-07	0.204092	0.723	0.64	1.55e-06
Mgp	0.170854	0.203933	0.172	0.114	0.175089
Hint1	6.74e-11	0.203625	0.976	0.976	1.16e-09
Pin1	3e-07	0.202811	0.716	0.602	2.06e-06
Oaz1	7.54e-13	0.202718	0.986	0.988	1.85e-11
Eif3a	2.37e-07	0.20266	0.924	0.886	1.69e-06
Ddx39b	5.69e-07	0.202554	0.903	0.878	3.53e-06
Hsp90b1	4.52e-06	0.20207	0.959	0.957	2.16e-05
Trp53	5.79e-06	0.201869	0.772	0.713	2.66e-05
Top2a	0.0107249	0.201785	0.375	0.333	0.0158195
Mest	7.48e-11	0.201772	0.997	0.988	1.27e-09
Adrm1	5.64e-07	0.201592	0.697	0.64	3.52e-06
Kdelr2	1.94e-06	0.201582	0.725	0.669	1.01e-05
Ssna1	4.15e-07	0.201477	0.716	0.628	2.67e-06
Fen1	0.000717741	0.201162	0.324	0.193	0.00169701
Tomm5	2.61e-07	0.201129	0.791	0.72	1.84e-06
Rpl35	4.91e-28	0.200667	0.998	0.996	5.07e-26
Cotl1	1.04e-05	0.20022	0.818	0.791	4.48e-05
Atic	7.31e-07	0.200109	0.493	0.346	4.37e-06
Alyref	1.58e-05	0.199839	0.723	0.675	6.5e-05
Rrm1	8.58e-05	0.199642	0.433	0.331	0.000278848
Eif1ax	8.32e-07	0.199539	0.815	0.746	4.89e-06
Dek	0.00059935	0.199003	0.856	0.823	0.00146546
Uchl3	1.14e-06	0.198998	0.558	0.474	6.41e-06
Eif2s1	2.44e-06	0.19883	0.764	0.695	1.23e-05
Ube2m	3.79e-07	0.198805	0.852	0.829	2.48e-06
Atp5g1	2.55e-06	0.198225	0.939	0.911	1.28e-05
Pdap1	1.61e-06	0.198123	0.93	0.902	8.55e-06
Ywhah	2.53e-07	0.198076	0.885	0.882	1.8e-06
Atp5j2	7.03e-10	0.198064	0.967	0.965	9.98e-09
Aplnr	1.86e-06	0.197708	0.89	0.852	9.74e-06
Rpl27	5.17e-09	0.197638	0.95	0.923	5.58e-08
Txnl1	3.19e-07	0.197526	0.88	0.858	2.17e-06
Fam171a2	2.13e-06	0.197294	0.75	0.681	1.09e-05
Isyna1	9.7e-06	0.197256	0.628	0.535	4.27e-05
Stip1	1.08e-06	0.197148	0.682	0.565	6.11e-06
Arpp19	9.91e-07	0.196763	0.884	0.87	5.62e-06
Gpx1	1.45e-06	0.196724	0.82	0.774	7.83e-06
Sf3b5	8.27e-07	0.196363	0.772	0.701	4.89e-06
Eif4a1	1.02e-09	0.196246	0.98	0.99	1.35e-08
mt-Atp6	3.97e-10	0.19623	0.995	1	5.81e-09
Ezh2	2.05e-05	0.196093	0.548	0.447	8.08e-05
Hpf1	1.36e-06	0.195845	0.595	0.488	7.48e-06
Cnn3	1.1e-06	0.195628	0.912	0.874	6.17e-06
Uqcr11	1.06e-08	0.195427	0.927	0.927	1.07e-07
Igfbp4	4.64e-09	0.195313	0.986	0.99	5.05e-08
Hnrnpab	8.91e-05	0.195266	0.887	0.866	0.000287185
Prdx6	2.44e-06	0.194945	0.838	0.815	1.23e-05
Cacybp	6.75e-05	0.194479	0.764	0.713	0.000227061
Tecr	6.64e-07	0.194355	0.847	0.803	4.04e-06
Mcm4	7.8e-05	0.194056	0.416	0.293	0.000256668
Psmb2	4.23e-07	0.193997	0.894	0.884	2.71e-06
Penk	0.240548	0.193853	0.163	0.124	0.244262
Uqcrq	8.81e-07	0.193599	0.897	0.9	5.1e-06
Ppp1r11	2.64e-06	0.192849	0.784	0.703	1.32e-05
Ddost	9.77e-07	0.192681	0.855	0.821	5.59e-06
Nans	3.46e-06	0.192428	0.585	0.441	1.7e-05
Sec61g	6e-08	0.192078	0.953	0.965	5.07e-07
Snrpa1	3.78e-05	0.192032	0.714	0.663	0.000137756
Kcnq1ot1	0.0111914	0.191943	0.821	0.791	0.0163207
Maged1	1.02e-05	0.191634	0.785	0.744	4.43e-05
Psmd7	1.22e-06	0.191208	0.882	0.823	6.74e-06
Ube2l3	1.88e-06	0.190927	0.85	0.815	9.82e-06
Rrbp1	1.34e-07	0.1908	0.964	0.947	1.01e-06
Raly	2.22e-07	0.190795	0.938	0.88	1.6e-06
Romo1	3.89e-07	0.190735	0.877	0.821	2.52e-06
Rpn1	9.03e-06	0.190677	0.735	0.695	4e-05
Jpt1	1.02e-05	0.190621	0.817	0.774	4.45e-05
Lyar	2.03e-05	0.190233	0.602	0.512	8.04e-05
Cct8	1.38e-06	0.190201	0.926	0.904	7.55e-06
Mrpl12	2.03e-05	0.190184	0.826	0.756	8.03e-05
Cox7c	3.81e-10	0.189824	0.98	0.984	5.69e-09
Car2	0.0191582	0.189788	0.269	0.222	0.0247533
Akr1b3	4.7e-05	0.189387	0.661	0.614	0.00016419
Ptms	2.81e-07	0.188916	0.95	0.913	1.95e-06
Wdr83os	2.01e-06	0.188348	0.749	0.667	1.04e-05
C1qbp	9.54e-05	0.188142	0.814	0.807	0.000300018
mt-Nd2	9.23e-10	0.187936	0.991	0.994	1.24e-08
Cox6c	2.21e-10	0.187791	0.982	0.978	3.52e-09
Fis1	3.18e-07	0.187674	0.927	0.923	2.17e-06
Cdca7	5.45e-05	0.187662	0.442	0.337	0.000186922
Mcm2	2.75e-05	0.187471	0.507	0.362	0.000104285
Eef1d	1.84e-07	0.187344	0.939	0.917	1.36e-06
Cct7	2.81e-06	0.187275	0.912	0.917	1.4e-05
Ap1s1	4.57e-06	0.186847	0.717	0.642	2.16e-05
Rpn2	1.77e-05	0.18675	0.828	0.75	7.17e-05
Larp7	1.3e-05	0.186475	0.638	0.547	5.47e-05
mt-Nd4l	1.79e-06	0.186188	0.927	0.907	9.41e-06
Psmb5	3.54e-07	0.186023	0.924	0.896	2.33e-06
Snrpd3	1.31e-05	0.185533	0.823	0.762	5.47e-05
Timm50	4.47e-06	0.185149	0.602	0.486	2.14e-05
Ywhaq	5.79e-07	0.185127	0.943	0.927	3.58e-06
Ruvbl1	4.82e-06	0.185073	0.71	0.626	2.25e-05
Ndufa2	8.21e-07	0.185063	0.909	0.892	4.87e-06
Pnp	1.89e-05	0.184553	0.817	0.772	7.62e-05
Dtymk	0.000153765	0.184298	0.631	0.541	0.000457814
Ndufb10	1.2e-06	0.183886	0.876	0.858	6.69e-06
Npm1	4.61e-06	0.183844	0.998	0.988	2.17e-05
Rfc2	1.6e-05	0.183815	0.61	0.535	6.56e-05
Fubp1	2.3e-05	0.183795	0.887	0.829	8.99e-05
Actb	8.61e-08	0.182888	1	1	6.92e-07
Rbbp7	7.18e-05	0.182727	0.705	0.638	0.000238722
Cdca8	0.0147291	0.1827	0.275	0.213	0.0202392
Eef1g	1.21e-09	0.182685	0.982	0.98	1.55e-08
Cald1	1.64e-05	0.182175	0.944	0.915	6.7e-05
Jpt2	0.00134607	0.181709	0.29	0.132	0.00282284
Tma7	1.5e-06	0.181703	0.93	0.915	8.04e-06
Eif4h	5.84e-06	0.181537	0.89	0.846	2.67e-05
Eif1	1.5e-09	0.180955	0.986	0.992	1.9e-08
Puf60	7.38e-06	0.180906	0.832	0.762	3.28e-05
Arpc1b	3.13e-08	0.180856	0.976	0.967	2.8e-07
Fkbp3	7.09e-05	0.180794	0.893	0.839	0.000236995
Atp5e	2.51e-09	0.180058	0.986	0.988	2.92e-08
Crip2	8.65e-07	0.180023	0.98	0.965	5.03e-06
U2af1	4.77e-05	0.179964	0.882	0.858	0.000166419
Uhrf1	0.000964776	0.179532	0.366	0.24	0.0021593
Fam167b	6.81e-06	0.179224	0.953	0.955	3.05e-05
Hes1	0.00790932	0.17913	0.776	0.709	0.0121753
Slirp	1.3e-05	0.178818	0.672	0.589	5.47e-05
Cfl1	6.14e-07	0.178482	0.991	0.994	3.78e-06
Tgfb1	2.67e-05	0.17823	0.867	0.852	0.000101805
Ostc	1.01e-05	0.178114	0.865	0.831	4.42e-05
Hmga1	0.00694725	0.178042	0.26	0.13	0.0109865
Psme2	2.37e-05	0.177988	0.758	0.724	9.18e-05
Anapc5	1.12e-05	0.177856	0.856	0.805	4.76e-05
Immt	2.2e-05	0.177846	0.772	0.691	8.61e-05
Rfc3	4.64e-05	0.177242	0.566	0.447	0.000162478
Nsmce4a	2.78e-05	0.177064	0.728	0.669	0.000105121
Gpatch4	3e-05	0.17676	0.484	0.378	0.00011254
Bok	8.21e-05	0.176504	0.619	0.551	0.000268735
Sumo2	9.67e-08	0.175911	0.964	0.965	7.65e-07
Smarce1	2.53e-05	0.175842	0.815	0.77	9.71e-05
Cmtm3	1.42e-05	0.175451	0.803	0.764	5.87e-05
Ube2v2	1.17e-05	0.175397	0.649	0.53	4.95e-05
Fth1	8.35e-07	0.175382	0.988	0.984	4.89e-06
Mrpl28	2.61e-05	0.175307	0.678	0.622	9.99e-05
Col1a2	0.0438322	0.175162	0.365	0.191	0.0488262
Arl3	1.04e-05	0.175157	0.582	0.506	4.48e-05
Nudc	2.02e-05	0.174533	0.884	0.843	8.01e-05
Aurkaip1	1.69e-05	0.174467	0.811	0.754	6.88e-05
Mydgf	1.93e-05	0.174437	0.785	0.695	7.73e-05
Sumo3	3.46e-05	0.174396	0.838	0.778	0.000127533
Smn1	1.11e-05	0.174152	0.57	0.48	4.75e-05
Timp2	0.00483534	0.17412	0.281	0.183	0.00822179
Gfer	1.33e-05	0.173619	0.536	0.4	5.51e-05
Mfsd13a	0.0218809	0.173537	0.233	0.059	0.0276762
Ddx21	0.000236975	0.173532	0.637	0.553	0.000663247
Luc7l3	0.000116067	0.173461	0.779	0.742	0.000355073
Hdac2	3.99e-05	0.173231	0.705	0.622	0.000144061
Eif6	7.54e-05	0.17311	0.788	0.724	0.000249251
Marcksl1	1.98e-05	0.173052	0.962	0.965	7.9e-05
Crip1	0.000328116	0.172996	0.812	0.768	0.000877729
Uqcr10	5.49e-06	0.172846	0.909	0.909	2.53e-05
Cdk4	1.86e-05	0.172845	0.932	0.919	7.52e-05
Hnrnpf	3.03e-06	0.17279	0.976	0.967	1.5e-05
Rnaseh2c	0.00018715	0.172663	0.703	0.677	0.000538382
Minos1	4.79e-06	0.172653	0.923	0.898	2.25e-05
Tsfm	1.03e-05	0.172477	0.525	0.409	4.47e-05
Mettl16	5.5e-05	0.172357	0.422	0.293	0.000188248
Mrpl17	0.00019037	0.172314	0.809	0.75	0.000545475
Mdk	0.0876849	0.172237	0.352	0.325	0.091809
Denr	9.02e-05	0.172189	0.726	0.65	0.000288845
Ndufs2	4.56e-06	0.171978	0.915	0.886	2.16e-05
Tmem97	0.000681737	0.17187	0.324	0.183	0.00162249
Nt5dc2	0.000313687	0.171808	0.812	0.742	0.000848421
Gnl3	0.00176793	0.17179	0.578	0.522	0.00354812
Prim1	0.000934873	0.171748	0.345	0.24	0.00210711
Maged2	9.19e-05	0.171501	0.903	0.823	0.000293062
Ndufb2	3.3e-05	0.171472	0.737	0.691	0.000122367
Pmp22	0.000543199	0.171238	0.67	0.616	0.00133903
Rrm2	0.0704331	0.170872	0.253	0.152	0.074555
Cebpz	0.000105719	0.170795	0.626	0.522	0.000328979
Ccdc124	0.000114305	0.170703	0.646	0.596	0.000350422
Arhgdib	0.000129111	0.170677	0.419	0.303	0.000390843
Hnrnpd	0.00032141	0.170659	0.921	0.937	0.000866072
H2afv	0.000850232	0.170557	0.905	0.876	0.00194665
Hnrnpr	0.000102006	0.170378	0.799	0.768	0.000319486
Hnrnpm	3.33e-05	0.170348	0.897	0.856	0.000123181
Atp5g3	1.19e-05	0.170337	0.92	0.902	5.01e-05
Syncrip	0.000169456	0.170221	0.713	0.64	0.000499395
Fam111a	0.00236457	0.170149	0.396	0.289	0.00453184
Gm7324	0.121184	0.169996	0.177	0.022	0.125701
Npm3	8.84e-05	0.169862	0.508	0.394	0.000285503
Eif3l	5.07e-05	0.169806	0.787	0.748	0.000175105
Psip1	0.00103065	0.169613	0.666	0.608	0.00227213
Tomm7	6.13e-06	0.169599	0.953	0.923	2.78e-05
Rad51ap1	0.0201895	0.169404	0.254	0.161	0.0258761
Celf1	2.95e-05	0.169196	0.567	0.463	0.000110832
Gtpbp4	0.00020078	0.16903	0.676	0.596	0.000573034
Atp5h	1.33e-07	0.168863	0.983	0.967	1.01e-06
Cct5	5e-06	0.168824	0.946	0.915	2.32e-05
Hnrnpk	1.28e-06	0.16848	0.98	0.967	7.06e-06
Clspn	0.0476278	0.168468	0.257	0.169	0.0522894
Dhfr	0.022608	0.168157	0.315	0.215	0.0282992
Psmd1	0.000240909	0.168105	0.696	0.652	0.000669234
Tmem258	3.72e-05	0.167764	0.884	0.846	0.000136024
Sec11a	3.99e-05	0.167667	0.849	0.787	0.000144061
Cops3	4.61e-05	0.167465	0.622	0.553	0.000161978
Hspe1	0.00294513	0.167289	0.93	0.921	0.00549176
Snrpb	1.31e-05	0.167223	0.956	0.927	5.47e-05
Actl6a	4.08e-05	0.166967	0.781	0.707	0.000146026
Smc6	0.000144453	0.166854	0.725	0.654	0.00043276
Park7	4.13e-05	0.166801	0.921	0.929	0.000147017
Uqcc2	3.86e-05	0.166704	0.849	0.841	0.000140295
Dcakd	6.32e-05	0.166304	0.458	0.364	0.000213833
Tmem14c	0.000157638	0.166283	0.826	0.797	0.000467422
Psmc2	7.14e-05	0.166216	0.784	0.746	0.000238089
Psmd6	6.97e-05	0.166167	0.841	0.785	0.000233894
Ddx39	0.000587602	0.166029	0.607	0.553	0.00144112
Apex1	0.000539544	0.16576	0.643	0.606	0.00133456
Cox4i1	7.99e-10	0.165694	0.995	0.994	1.09e-08
Ung	0.00143535	0.165679	0.324	0.224	0.00297985
Psmb6	1.61e-05	0.165613	0.927	0.929	6.59e-05
Psma7	1.31e-05	0.165391	0.953	0.947	5.47e-05
Eif3b	0.00010284	0.165327	0.696	0.604	0.000321402
D8Ertd738e	5.27e-05	0.165256	0.88	0.852	0.000181089
Meaf6	6.29e-05	0.16508	0.43	0.317	0.000213178
Serpine2	0.00323585	0.165075	0.581	0.49	0.00593444
Prdx2	4.66e-08	0.165025	0.982	0.97	3.99e-07
mt-Co2	2.15e-07	0.164888	0.986	0.994	1.55e-06
Hist1h1e	0.0122856	0.164555	0.61	0.541	0.017463
Efemp2	0.000199591	0.164479	0.425	0.315	0.000570768
Nsun2	0.000107307	0.16445	0.528	0.425	0.000333206
Ndufb8	2.4e-05	0.16434	0.929	0.917	9.24e-05
Pfn1	3.37e-05	0.164084	0.988	0.982	0.000124265
Ddx1	0.000110358	0.163956	0.741	0.661	0.000341213
Tbcb	9.43e-05	0.163937	0.817	0.789	0.000298722
Psmb4	3.68e-05	0.163895	0.908	0.904	0.000134818
Dtl	0.0167432	0.16385	0.275	0.193	0.0222679
Hmgb1	0.00356405	0.163761	0.992	0.992	0.00643039
Ocel1	0.00205406	0.163605	0.289	0.132	0.00406041
Nudt5	4.91e-05	0.163388	0.607	0.514	0.000170345
Ube2c	0.0802118	0.16336	0.318	0.283	0.0844734
Cox5a	7.71e-05	0.163174	0.971	0.965	0.000253967
Hspa8	6.03e-08	0.162984	0.998	0.998	5.07e-07
Psmb3	2.91e-05	0.162771	0.918	0.878	0.00010951
Hmbs	0.000134999	0.16264	0.436	0.384	0.000407815
Dnaja2	0.000122512	0.16253	0.825	0.783	0.000373211
Arpc5l	7.53e-05	0.162493	0.77	0.681	0.000249251
Ccar1	0.000252141	0.162371	0.762	0.669	0.000697606
Naa10	7.09e-05	0.162364	0.632	0.518	0.000236995
Grb10	0.000225753	0.162345	0.917	0.911	0.000635533
Col18a1	0.00120899	0.162306	0.517	0.419	0.00259556
Bcap31	4e-05	0.161597	0.838	0.77	0.000144061
Phb2	0.00010029	0.161469	0.918	0.89	0.000314792
Uqcrc1	5.73e-05	0.161137	0.923	0.894	0.000195498
Casp8ap2	0.00123205	0.161055	0.501	0.439	0.00262558
Hsd17b12	9.5e-05	0.161045	0.566	0.451	0.000299588
Arl6ip4	0.000156268	0.160984	0.608	0.543	0.000464311
Ptbp1	0.000178962	0.160594	0.743	0.657	0.000519995
Smarcc1	0.000161905	0.160592	0.602	0.482	0.000478117
Hmgcs1	0.000629365	0.160532	0.433	0.337	0.00152184
Lsp1	0.0303518	0.160507	0.318	0.234	0.0355045
Psma4	9.5e-05	0.160417	0.896	0.89	0.000299588
Zcchc17	9.02e-05	0.160399	0.646	0.569	0.000288845
Rpl14	2.01e-11	0.160387	0.997	0.996	3.87e-10
Smc4	0.0325694	0.1602	0.575	0.549	0.0376855
Psmd8	5.92e-05	0.160097	0.911	0.89	0.000201605
Csrp1	0.000661848	0.160054	0.741	0.709	0.00158559
Gcsh	0.000236332	0.159862	0.546	0.474	0.000662738
Mrpl20	0.000143796	0.159689	0.785	0.764	0.000431686
Ndufv1	0.000113977	0.159374	0.802	0.728	0.000350399
Gpr182	0.0118667	0.159274	0.557	0.51	0.0171198
Ndufa4	6.14e-06	0.15914	0.986	0.984	2.78e-05
Rnps1	0.000366366	0.159131	0.672	0.589	0.000963877
Ptges3	0.000734632	0.159121	0.752	0.685	0.00172287
Pcna	0.00658813	0.159103	0.31	0.224	0.0105688
Trim37	6.12e-05	0.158798	0.528	0.394	0.000207928
Cwc15	0.00021344	0.158782	0.775	0.754	0.000605583
Lyve1	0.237521	0.158642	0.104	0.077	0.241357
Dbi	0.000332204	0.158503	0.912	0.894	0.000886899
Cenpw	0.0203665	0.158299	0.274	0.207	0.0260569
Ptma	0.000113017	0.158258	1	1	0.000348691
Pold2	0.000661669	0.158098	0.402	0.325	0.00158559
Fkbp8	0.000145373	0.15777	0.847	0.778	0.000434618
Psmc6	0.000174776	0.15752	0.811	0.772	0.000512985
Etf1	0.000143021	0.157487	0.613	0.549	0.000430252
Eif3g	0.000536965	0.157472	0.793	0.752	0.00133303
Mrto4	0.000454824	0.157364	0.622	0.528	0.00115395
Cox7b	0.000179698	0.157324	0.917	0.894	0.000521089
Pycrl	0.000183348	0.157302	0.484	0.392	0.00052955
Ppid	0.000449491	0.157178	0.72	0.636	0.0011451
Swi5	0.000371917	0.157116	0.89	0.89	0.000973173
Mrps18a	0.000218635	0.157074	0.648	0.583	0.000617901
Cfdp1	0.000105338	0.156961	0.899	0.872	0.000328499
Ndufb9	2.06e-05	0.156841	0.936	0.927	8.12e-05
Xrn2	0.000785075	0.156635	0.705	0.665	0.00182052
Psmd2	0.000177438	0.156269	0.84	0.764	0.000517673
Dynll1	0.00122152	0.156135	0.989	0.986	0.0026147
Acp1	0.000263409	0.156077	0.762	0.742	0.000720516
Cox7a2	7.39e-05	0.156056	0.949	0.933	0.000245294
Eif3c	0.000114055	0.1559	0.929	0.88	0.000350399
Actr3	0.00024341	0.155899	0.858	0.815	0.00067474
Raph1	0.000539296	0.155887	0.77	0.695	0.00133456
Smc1a	0.000474491	0.155791	0.902	0.843	0.00119407
Smarcb1	0.000254186	0.155607	0.719	0.646	0.000701558
Nap1l1	0.00291901	0.15538	0.876	0.898	0.00545987
Eif2s2	0.000127869	0.15535	0.968	0.959	0.000387897
Tead2	0.000389974	0.155347	0.655	0.571	0.00100767
Timm10	0.000350068	0.155141	0.46	0.337	0.000930023
Gars	0.00064419	0.155079	0.663	0.598	0.00155099
Txn1	0.00161376	0.154914	0.958	0.959	0.00327772
Telo2	0.000506367	0.154867	0.357	0.256	0.00126548
Cdc37	0.000109605	0.154737	0.935	0.919	0.00033961
Ndufab1	0.0004676	0.154323	0.884	0.87	0.00117878
Ccnd2	0.00672998	0.154159	0.791	0.74	0.0107094
Arhgdia	0.000176465	0.15409	0.897	0.841	0.000516893
Slc25a4	9.25e-05	0.153993	0.973	0.97	0.000294224
Nde1	0.00116067	0.153905	0.351	0.256	0.0025067
Selenos	0.000223632	0.153597	0.537	0.394	0.000630789
Cox6a1	8.53e-05	0.153591	0.921	0.921	0.000278007
Bag1	0.00023743	0.153534	0.849	0.831	0.000663247
Racgap1	0.0602606	0.153526	0.221	0.122	0.0645904
Ndufb7	0.000161013	0.153524	0.902	0.87	0.000476454
Nap1l4	0.000354062	0.153406	0.734	0.681	0.000936615
Timm17a	0.000350285	0.153399	0.722	0.681	0.000930023
Abcf2	0.000119218	0.153304	0.525	0.431	0.000363942
Calm1	4.06e-05	0.152964	0.998	0.998	0.000145821
Aes	0.00018623	0.152863	0.927	0.917	0.000536802
Rfc4	0.00711308	0.152824	0.408	0.317	0.0111876
Elavl1	0.00032456	0.152824	0.707	0.642	0.000871314
Cops6	0.000273351	0.152814	0.852	0.835	0.000746299
Usp1	0.00995319	0.152814	0.477	0.404	0.014863
Mybbp1a	0.00139649	0.152404	0.47	0.374	0.00290334
Mrpl13	0.000769165	0.152284	0.703	0.683	0.00178936
Rcn2	0.000328163	0.152154	0.558	0.457	0.000877729
Rps21	3.6e-10	0.151873	0.998	0.998	5.49e-09
Rpl36	1.27e-12	0.151755	0.998	0.996	3.02e-11
Sap18	0.000514462	0.151628	0.776	0.713	0.00128349
Nolc1	0.00301874	0.151153	0.474	0.398	0.00560733
Gspt1	0.000840618	0.151069	0.787	0.732	0.00192769
Lxn	0.00170797	0.151012	0.702	0.657	0.00344202
Canx	0.000921355	0.150958	0.814	0.783	0.00208035
Nedd8	8.75e-05	0.150859	0.941	0.931	0.000283162
Tmpo	0.00149125	0.15084	0.697	0.626	0.00307384
Nudt21	0.000373945	0.150835	0.694	0.663	0.000973198
Atpif1	9.4e-05	0.1508	0.97	0.974	0.000298382
Rwdd1	0.000565491	0.150687	0.87	0.835	0.00138924
Impdh2	0.00122736	0.150651	0.796	0.778	0.00262332
Polr2h	0.000239482	0.150562	0.51	0.445	0.000667689
Ergic1	0.000436827	0.15053	0.39	0.272	0.00111874
Akr1a1	0.000351164	0.150504	0.941	0.939	0.00093065
Elob	0.000319062	0.150307	0.959	0.955	0.000861347
Tceal8	0.000448311	0.150287	0.626	0.567	0.0011441
Mrps7	0.000372698	0.150268	0.703	0.622	0.000973198
Tk1	0.0545155	0.150261	0.287	0.197	0.0590007
Atp5a1	1.54e-05	0.150241	0.986	0.984	6.34e-05
Itpa	0.000254539	0.150187	0.536	0.429	0.000701558
Txnrd1	0.0004454	0.150015	0.475	0.392	0.00113868
Ubb	1.99e-07	0.149988	0.998	1	1.46e-06
Grcc10	0.00028117	0.149874	0.496	0.411	0.00076476
Ppm1g	0.00138776	0.149782	0.694	0.62	0.0028935
Psmd11	0.000403497	0.149578	0.747	0.659	0.00104075
Mrfap1	0.000322503	0.149565	0.936	0.923	0.000867402
Ndufa12	0.000661145	0.149539	0.891	0.868	0.00158559
Bop1	0.000914459	0.149529	0.354	0.258	0.00207338
Ninj1	0.000603144	0.149439	0.589	0.516	0.00146927
Map7d1	0.000668602	0.149052	0.644	0.561	0.00159648
Imp4	0.000370984	0.149003	0.514	0.449	0.000972488
Arpc2	0.000387433	0.148791	0.962	0.953	0.00100289
Mlf2	0.00129162	0.148656	0.785	0.766	0.00272445
Gstk1	0.00571845	0.148572	0.334	0.28	0.00940296
Eprs	0.000892503	0.148554	0.752	0.695	0.00203278
Dpy30	0.000708883	0.148486	0.626	0.555	0.00168432
Cct4	0.000626649	0.148393	0.923	0.892	0.00152073
Snrpe	0.00045536	0.148134	0.944	0.937	0.00115395
D030007L05Rik	0.0635616	0.14806	0.204	0.124	0.0678272
Nars	0.000466402	0.147942	0.654	0.569	0.00117781
Got2	0.000347713	0.14789	0.61	0.512	0.000926596
Kpnb1	0.00119031	0.147804	0.592	0.561	0.00256307
Serf1	0.00102302	0.147795	0.652	0.579	0.0022714
Pdia3	0.00200481	0.147756	0.929	0.929	0.00396848
Tspan3	0.00131634	0.147703	0.734	0.705	0.00276853
Mid1ip1	0.0232975	0.147656	0.254	0.159	0.0289369
Aprt	0.00144483	0.147557	0.927	0.919	0.00299095
Atad2	0.0192407	0.147554	0.386	0.35	0.0248361
Bud31	0.000406713	0.147552	0.682	0.6	0.00104346
Mrpl3	0.000257115	0.1475	0.54	0.435	0.000707312
Mrpl51	0.000663846	0.147416	0.772	0.687	0.00158774
Ssr2	0.000297964	0.147357	0.891	0.882	0.00080892
Ubl5	0.000715502	0.147152	0.873	0.866	0.00169449
Mtap	0.00496169	0.147036	0.407	0.337	0.00839715
Ebna1bp2	0.0026361	0.146974	0.672	0.657	0.00499272
Calm2	0.000724728	0.146961	0.961	0.953	0.00170517
Mrps6	0.000946135	0.146802	0.548	0.484	0.00212587
Cyc1	0.00148229	0.146723	0.841	0.789	0.00305974
Rfc1	0.00292048	0.146692	0.66	0.581	0.00545987
Lsm12	0.00074189	0.146618	0.699	0.681	0.00173427
Cdc5l	0.000773101	0.146255	0.602	0.526	0.00179563
Hspa9	0.00246441	0.146214	0.815	0.754	0.00470449
Ipo11	0.00465667	0.146174	0.844	0.815	0.00797421
Emg1	0.000965494	0.146097	0.797	0.746	0.0021593
Psma5	0.000728244	0.146033	0.832	0.827	0.00171067
Eif5b	0.00144365	0.145982	0.914	0.89	0.00299095
F11r	0.000811577	0.145932	0.835	0.77	0.00186999
Pcbp1	0.000498139	0.145891	0.936	0.919	0.00124923
Cox20	0.00107623	0.145713	0.596	0.545	0.00235627
Bzw1	0.000643037	0.145647	0.905	0.864	0.00155079
Clns1a	0.000599552	0.14561	0.651	0.591	0.00146546
Smc2	0.0121518	0.14549	0.513	0.409	0.0174057
Guk1	0.00114062	0.145258	0.622	0.543	0.00247449
Hat1	0.00494076	0.145231	0.52	0.457	0.00837153
Cks2	0.0143307	0.145068	0.454	0.404	0.01982
Esd	0.00079899	0.145022	0.876	0.821	0.00184687
Ssb	0.000385157	0.144927	0.927	0.898	0.00100058
Mbd3	0.000740081	0.144799	0.79	0.748	0.00173284
Usp14	0.000921563	0.144483	0.622	0.551	0.00208035
Rap1b	0.00211558	0.144477	0.859	0.827	0.00414802
Cnih1	0.000623791	0.144395	0.688	0.6	0.00151702
Mvk	0.0035001	0.144377	0.331	0.22	0.00635322
Ndufs4	0.000892923	0.144364	0.793	0.774	0.00203278
Gtf2h5	0.00233432	0.144259	0.806	0.717	0.00449769
Sox11	0.0037659	0.144251	0.48	0.398	0.00670266
2010111I01Rik	0.00103106	0.144168	0.725	0.665	0.00227213
Cdc42	0.00051874	0.143992	0.983	0.967	0.00129194
Hnrnpa2b1	0.0195968	0.143878	0.968	0.965	0.0252058
Atp1b3	0.00123153	0.14376	0.697	0.612	0.00262558
Rars	0.000764404	0.1434	0.641	0.553	0.00178115
Map2k2	0.00102667	0.143332	0.775	0.754	0.00227213
Ctnnbl1	0.00126114	0.143264	0.658	0.583	0.00267184
Tfdp1	0.001006	0.143236	0.446	0.325	0.00223951
Uchl5	0.00083511	0.14315	0.455	0.356	0.0019181
Lars	0.000602634	0.143138	0.545	0.419	0.00146927
Ndufa3	0.000537081	0.143064	0.899	0.831	0.00133303
Tomm70a	0.00114376	0.14294	0.519	0.451	0.00247758
Aimp2	0.00124415	0.142893	0.448	0.366	0.00264613
Nubp2	0.00307037	0.142822	0.322	0.209	0.00568863
Igf1	0.0675675	0.142789	0.713	0.685	0.0717316
Rpl38	5.87e-11	0.14277	0.998	0.998	1.05e-09
Trir	0.000987211	0.142468	0.877	0.854	0.00220447
Sgta	0.000853939	0.142146	0.649	0.593	0.00195205
Cops5	0.00127908	0.142114	0.797	0.73	0.00270588
Suclg1	0.00104868	0.14206	0.802	0.738	0.00230265
Cdc45	0.146065	0.142012	0.191	0.106	0.150432
Tomm20	0.000373638	0.141761	0.932	0.9	0.000973198
Cbx5	0.00761685	0.141551	0.644	0.591	0.0118131
Cyb5b	0.00425653	0.141396	0.613	0.543	0.00739676
Glrx5	0.000997656	0.141172	0.753	0.679	0.00222436
Nipsnap3b	0.000723315	0.141152	0.448	0.372	0.00170517
Mrpl16	0.00160285	0.141152	0.399	0.291	0.00326665
Elof1	0.00161934	0.141106	0.649	0.591	0.00328176
Rfc5	0.0176624	0.141098	0.316	0.228	0.023213
Ddx56	0.00135962	0.14084	0.374	0.256	0.00284301
Ilf2	0.00223391	0.140827	0.716	0.675	0.00432728
Med10	0.000944193	0.140811	0.691	0.628	0.0021248
Psmd13	0.00145988	0.140749	0.769	0.713	0.00301778
Ufm1	0.000627419	0.140743	0.634	0.524	0.00152073
Prpf19	0.00268008	0.140575	0.607	0.555	0.00506939
Gtf3c6	0.000893469	0.140507	0.557	0.488	0.00203278
Snrpc	0.00225155	0.140438	0.799	0.801	0.00434979
Hnrnpdl	0.0121732	0.140422	0.805	0.758	0.0174057
Gm17018	0.000804297	0.140377	0.566	0.494	0.00185617
Spcs2	0.00160161	0.14027	0.891	0.884	0.00326665
Fkbp4	0.00430876	0.140174	0.737	0.677	0.00746679
Chd4	0.00397752	0.140125	0.764	0.73	0.00699329
Ppic	8.45e-05	0.139959	0.943	0.923	0.000275851
Idh3a	0.00154265	0.139893	0.464	0.392	0.00315729
Alkbh1	0.00360838	0.13976	0.514	0.433	0.00648613
Sec61b	0.00179671	0.139721	0.935	0.931	0.00360089
Kif15	0.321702	0.139712	0.139	0.063	0.325072
Ndufa10	0.00125874	0.139643	0.85	0.821	0.00267068
Samm50	0.00135786	0.139572	0.8	0.711	0.00284301
Atp5o.1	0.00103043	0.139527	0.961	0.939	0.00227213
Smdt1	0.000794297	0.139522	0.924	0.904	0.00183896
Nr2f2	0.147204	0.13949	0.649	0.628	0.151496
Copz1	0.00124534	0.139467	0.589	0.484	0.00264613
Rbm28	0.00161508	0.139347	0.533	0.443	0.00327772
Ndufa1	0.00213923	0.139337	0.759	0.697	0.00418872
Cisd2	0.00164676	0.139279	0.53	0.459	0.00332803
Homer3	0.00115814	0.139073	0.593	0.524	0.00250497
Dera	0.00104533	0.138924	0.489	0.402	0.00229877
Rrs1	0.00570936	0.13892	0.337	0.22	0.00940296
St13	0.000915613	0.138885	0.89	0.864	0.00207338
Ccna2	0.121625	0.138836	0.206	0.128	0.126068
Tmem167	0.00207586	0.138751	0.734	0.63	0.00408675
Fkbp2	0.00217813	0.138667	0.651	0.577	0.00425338
Lsm7	0.00410231	0.138639	0.663	0.64	0.00716184
Mrps18b	0.00139326	0.138579	0.452	0.372	0.00290079
Pet100	0.00172281	0.138555	0.713	0.695	0.00346237
Grpel1	0.00255404	0.13851	0.809	0.754	0.00486917
Tmsb4x	0.0368529	0.138483	0.998	0.996	0.0419891
E2f1	0.0174115	0.138333	0.295	0.205	0.0230507
Lman1	0.00151138	0.138175	0.732	0.683	0.00310209
Bub3	0.00152395	0.138122	0.737	0.642	0.00312345
Pfdn1	0.00205687	0.138074	0.834	0.831	0.00406042
Rbbp4	0.00180172	0.13799	0.829	0.797	0.00360594
Mrps25	0.00162918	0.137935	0.477	0.388	0.0032971
Mrpl42	0.00198572	0.137799	0.74	0.669	0.00394148
Slc35b2	0.00102346	0.137775	0.437	0.348	0.0022714
Prelid1	0.00272753	0.137762	0.912	0.925	0.00514568
Hivep2	0.00136527	0.137745	0.395	0.295	0.00285072
Lamp1	0.000723618	0.137553	0.927	0.9	0.00170517
Aatf	0.00295437	0.137547	0.352	0.242	0.0055019
Nup43	0.0124431	0.137545	0.295	0.201	0.0176348
Serbp1	0.00121493	0.137334	0.989	0.986	0.00260445
Uba2	0.00306805	0.137258	0.676	0.654	0.00568863
Tsen34	0.00210353	0.13711	0.814	0.78	0.00413532
Mxra7	0.00103164	0.136905	0.481	0.374	0.00227213
Atp5f1	0.000208123	0.136868	0.949	0.953	0.000592823
P4hb	0.00347046	0.136415	0.743	0.695	0.00631667
H2afy	0.0022511	0.136395	0.912	0.898	0.00434979
Limd2	0.00524421	0.13636	0.628	0.571	0.00876611
Dynlt1f	0.00330391	0.136315	0.425	0.364	0.00604394
Rps27l	0.0129172	0.136275	0.921	0.915	0.0182175
Eny2	0.00340685	0.136227	0.814	0.774	0.00620871
Ola1	0.00549044	0.136043	0.684	0.62	0.00909001
Snrpa	0.00259133	0.135983	0.747	0.683	0.00492728
Fn1	0.148487	0.135969	0.239	0.148	0.152708
Eif4a3	0.00288778	0.135866	0.787	0.766	0.00541271
Lamtor1	0.00206873	0.135822	0.776	0.726	0.00407827
Slc25a39	0.00215863	0.13577	0.7	0.654	0.00422099
Fkbp10	0.00226595	0.135697	0.72	0.628	0.00437177
Dctd	0.0790971	0.135684	0.225	0.138	0.0833602
Pmf1	0.00913309	0.135657	0.349	0.266	0.0138238
2610524H06Rik	0.0015697	0.135654	0.393	0.274	0.00320813
Gipc1	0.00500883	0.135623	0.75	0.748	0.00845716
Snrnp40	0.00521424	0.135508	0.643	0.585	0.00873457
Gatm	0.0391211	0.135421	0.23	0.138	0.0441906
Farsa	0.00133036	0.135337	0.575	0.482	0.00279396
mt-Atp8	0.0022039	0.135317	0.915	0.917	0.0042817
Mfap2	0.0170613	0.135258	0.451	0.388	0.0226439
Sf1	0.00107636	0.135254	0.495	0.376	0.00235627
Nup85	0.0296575	0.13517	0.272	0.165	0.0350036
Txndc9	0.00220869	0.135159	0.726	0.657	0.00428415
Shmt2	0.00363214	0.135143	0.375	0.307	0.00650514
Atp2a2	0.00120023	0.135129	0.496	0.398	0.00258058
Eif1a	0.00273731	0.135129	0.558	0.492	0.00515741
Cldn15	0.0204136	0.135045	0.283	0.195	0.0260741
Mrps12	0.00161463	0.135036	0.539	0.474	0.00327772
Adamtsl1	0.0220888	0.135026	0.259	0.175	0.0278418
Atp5j	0.00130637	0.13497	0.974	0.961	0.00275156
Cpsf6	0.00258905	0.134934	0.62	0.555	0.00492728
Cisd1	0.00499037	0.134905	0.657	0.571	0.00843583
Cfl2	0.00219882	0.134859	0.781	0.74	0.0042817
Ccdc34	0.0303398	0.134738	0.66	0.614	0.0355045
Ftsj3	0.0039688	0.134705	0.38	0.291	0.00698765
Dhx15	0.00372652	0.134615	0.657	0.616	0.00664892
Man2b1	0.00113261	0.134531	0.458	0.331	0.0024608
Hspa14	0.00406058	0.134425	0.573	0.502	0.00711339
Psmd3	0.00417149	0.134274	0.735	0.691	0.00727247
Anapc15	0.00833339	0.134215	0.337	0.248	0.0127467
Cs	0.00347621	0.134193	0.495	0.484	0.0063192
Dnajc15	0.00194709	0.134075	0.667	0.591	0.0038701
Exosc8	0.00354141	0.134009	0.587	0.5	0.00640049
Ddb1	0.00191052	0.134008	0.731	0.628	0.00380265
Ppih	0.00491478	0.134006	0.407	0.346	0.00833726
Timm8a1	0.00562992	0.133977	0.489	0.407	0.00929965
Aen	0.00698137	0.133971	0.349	0.238	0.0110164
Polr2m	0.00362786	0.133886	0.843	0.809	0.00650514
Rangap1	0.0212422	0.133866	0.3	0.23	0.0269627
Smc3	0.0141573	0.133851	0.741	0.717	0.0196034
Acat2	0.0440513	0.1336	0.26	0.138	0.0490325
Auts2	0.0115271	0.133497	0.648	0.614	0.0166797
Scarf1	0.00129017	0.133443	0.626	0.506	0.00272445
Eif3i	0.00237171	0.133097	0.912	0.904	0.0045395
Vps29	0.00316426	0.133094	0.803	0.776	0.0058179
Wdr18	0.00402554	0.13305	0.596	0.524	0.00706055
Brd3	0.00354305	0.132895	0.589	0.528	0.00640049
1810058I24Rik	0.00311742	0.132861	0.794	0.746	0.00573907
Psma1	0.00310826	0.132787	0.826	0.787	0.0057295
Uba1	0.00260664	0.132747	0.663	0.606	0.00494988
Aven	0.00396206	0.132511	0.349	0.246	0.00698765
Vrk1	0.00719202	0.132368	0.349	0.254	0.0112873
Nubp1	0.00190062	0.132348	0.442	0.337	0.00378815
Tkt	0.00685249	0.132212	0.865	0.827	0.0108604
Magoh	0.00468499	0.132169	0.713	0.667	0.00801322
Psmc3	0.0100755	0.132121	0.847	0.837	0.0149838
Eif2b5	0.00169844	0.132112	0.474	0.398	0.00342766
Hapln1	0.0154554	0.132035	0.259	0.169	0.0209204
Aars	0.0060267	0.132028	0.34	0.213	0.00982054
Cenpk	0.133363	0.131942	0.206	0.14	0.13784
Gart	0.00261467	0.131939	0.466	0.376	0.00495862
Slc38a1	0.00602402	0.131939	0.443	0.382	0.00982054
Rpl36a	1.42e-06	0.131897	0.992	0.996	7.71e-06
Ndufs6	0.0066032	0.13189	0.847	0.837	0.0105695
Ywhae	0.00187295	0.131753	0.985	0.976	0.00374332
Esam	0.000962729	0.131741	0.955	0.943	0.0021593
Psmc4	0.00535198	0.131739	0.874	0.815	0.00891176
Epn1	0.00242946	0.131738	0.678	0.598	0.00464389
Psma6	0.00679343	0.131712	0.859	0.827	0.0107786
Mat2a	0.00586666	0.13157	0.737	0.667	0.0096357
Psma3	0.00340168	0.131506	0.926	0.927	0.0062071
Actg1	0.0113694	0.131456	0.998	0.992	0.0165011
2022-09-07	0.00274858	0.131418	0.938	0.913	0.00517191
Ptpn1	0.00604467	0.131076	0.614	0.561	0.00983873
Gpaa1	0.00188862	0.130977	0.454	0.372	0.00376942
Myl9	0.254501	0.130966	0.194	0.126	0.258249
Mdh1	0.00720329	0.130963	0.828	0.807	0.0112927
Bloc1s1	0.0111616	0.130877	0.303	0.187	0.016314
Cox6b1	0.00234833	0.130788	0.964	0.97	0.00450716
Mrpl32	0.00210624	0.130767	0.637	0.533	0.00413532
Gps1	0.00377392	0.130754	0.685	0.628	0.00670867
Baz1a	0.00559489	0.130595	0.508	0.423	0.00925235
Gsn	0.143643	0.130587	0.304	0.297	0.148148
Ap2s1	0.00504805	0.130474	0.853	0.831	0.00850353
Atp5b	0.00110702	0.130452	0.988	0.992	0.00241607
Ncln	0.00310823	0.130451	0.399	0.319	0.0057295
Lsm4	0.0222359	0.130328	0.773	0.758	0.0279542
Rexo2	0.00607263	0.130245	0.713	0.685	0.00985586
Jam3	0.00754792	0.130172	0.64	0.593	0.0117682
Sec13	0.00392136	0.13016	0.623	0.567	0.00692821
Bola1	0.00373155	0.129922	0.434	0.343	0.0066497
Polr2i	0.00363245	0.129781	0.71	0.634	0.00650514
Rpl36al	0.00709677	0.129754	0.746	0.711	0.0111741
Zc3h15	0.00536329	0.129752	0.84	0.803	0.00892032
Mrpl15	0.00474216	0.129733	0.716	0.661	0.00808233
Mrpl30	0.0057142	0.129694	0.782	0.726	0.00940296
Myo10	0.00514954	0.129608	0.425	0.386	0.0086443
Rpsa	6.84e-08	0.12945	1	1	5.69e-07
Dok4	0.00462688	0.129448	0.69	0.644	0.00794199
Srsf10	0.00672382	0.129399	0.749	0.707	0.0107094
Smchd1	0.00677462	0.129306	0.623	0.579	0.0107606
Dcaf13	0.00200344	0.129205	0.48	0.394	0.00396848
Ppp2ca	0.00372463	0.129204	0.89	0.886	0.00664892
Mrps15	0.00456019	0.129193	0.71	0.606	0.00785547
Ndufs8	0.00651038	0.128968	0.814	0.785	0.0104556
Cers5	0.00220194	0.128962	0.505	0.413	0.0042817
Ktn1	0.00234078	0.128824	0.897	0.839	0.00450413
Sac3d1	0.00460496	0.128709	0.345	0.25	0.00792159
Csnk2b	0.00527156	0.128663	0.811	0.787	0.0087981
Gmps	0.00607562	0.128652	0.607	0.537	0.00985586
Anxa2	0.0810671	0.128595	0.956	0.959	0.08525
Mrps18c	0.00300206	0.128521	0.655	0.573	0.00558353
Oat	0.00465476	0.128495	0.495	0.425	0.00797421
Ppat	0.0067236	0.128428	0.343	0.244	0.0107094
Aifm1	0.0033868	0.128116	0.611	0.512	0.00618775
Hnrnph2	0.00401823	0.127944	0.558	0.476	0.00705628
Gdi2	0.00280832	0.12791	0.952	0.923	0.00527745
Sfxn1	0.0121178	0.12791	0.455	0.423	0.0174057
Slc25a17	0.00352119	0.127899	0.365	0.258	0.00637692
Mapre1	0.0050361	0.127806	0.815	0.78	0.00849328
Chaf1a	0.0576733	0.127798	0.263	0.197	0.0619549
Sema4c	0.00378854	0.127765	0.464	0.372	0.0067264
Me2	0.00903249	0.127472	0.328	0.228	0.013729
Calm3	0.00433954	0.127402	0.829	0.801	0.00751114
Cuedc2	0.00537772	0.127402	0.784	0.72	0.00892611
Tmem256	0.00629986	0.12714	0.84	0.823	0.0101513
Sdhb	0.00591231	0.127037	0.885	0.856	0.00967777
Myg1	0.00743973	0.127029	0.366	0.295	0.0116256
Sltm	0.00756353	0.126997	0.707	0.638	0.0117682
Dlst	0.00425812	0.126971	0.542	0.478	0.00739676
Pole4	0.00460952	0.126676	0.442	0.364	0.00792159
Ndufb6	0.00910681	0.126536	0.8	0.785	0.0138129
Rpl37a	5.02e-10	0.126502	1	0.998	7.26e-09
Stub1	0.0100048	0.126418	0.825	0.803	0.0149093
Dnajc2	0.0107594	0.126414	0.688	0.622	0.0158404
Tax1bp3	0.00360371	0.126379	0.738	0.679	0.00648579
Dbn1	0.00620418	0.125969	0.657	0.6	0.0100307
Serp1	0.00350371	0.125901	0.52	0.435	0.00635322
Rpl41	1.43e-08	0.1259	1	1	1.38e-07
Tmed5	0.00954921	0.12581	0.625	0.551	0.0143486
Arf1	0.00448339	0.125665	0.961	0.947	0.00775085
Pnn	0.0275989	0.125468	0.858	0.858	0.0331156
Dazap1	0.00849052	0.125457	0.753	0.699	0.0129597
Tmbim6	0.00609527	0.125365	0.902	0.898	0.00986561
Mtf2	0.00409794	0.125262	0.542	0.461	0.00716184
Wsb2	0.00326348	0.125141	0.573	0.47	0.00597753
Topbp1	0.0130713	0.124948	0.489	0.417	0.0183953
Polr2l	0.014741	0.12493	0.33	0.25	0.0202392
Snrnp70	0.0154509	0.124748	0.891	0.884	0.0209204
Selenow	0.00946633	0.124376	0.956	0.972	0.0142389
Jagn1	0.00368542	0.124334	0.549	0.455	0.00659184
Ndufv2	0.0104803	0.124263	0.849	0.837	0.0154812
Cpsf2	0.00384026	0.124238	0.454	0.358	0.00680154
Ywhag	0.00472234	0.124151	0.445	0.374	0.00806755
Hmgn5	0.027289	0.124114	0.593	0.53	0.0328512
Gon7	0.0499142	0.124006	0.231	0.179	0.0545513
Ccdc3	0.0574189	0.123961	0.257	0.157	0.0617275
Lage3	0.00781509	0.123956	0.634	0.577	0.0120559
Emilin1	0.00508878	0.123922	0.811	0.795	0.00856217
Rpl7l1	0.00965042	0.123899	0.69	0.61	0.0144706
Coq7	0.00606052	0.123876	0.54	0.524	0.00985345
Sf3a3	0.00845894	0.123644	0.629	0.598	0.0129251
Tsen15	0.00455017	0.123619	0.415	0.333	0.00784933
Ctbp2	0.00359266	0.123435	0.525	0.433	0.00647395
Hells	0.0462775	0.123406	0.436	0.303	0.0511563
Fh1	0.00756343	0.123255	0.711	0.681	0.0117682
Rbm25	0.0325416	0.123238	0.92	0.898	0.0376855
Cbx1	0.0164905	0.123225	0.84	0.809	0.022033
Rnf187	0.00978152	0.123144	0.761	0.734	0.0146369
Parp1	0.0100252	0.123133	0.51	0.435	0.0149244
Bad	0.0066263	0.123027	0.635	0.602	0.0105948
Sf3b4	0.00396949	0.12299	0.523	0.419	0.00698765
Exosc1	0.00747842	0.122983	0.392	0.311	0.0116734
Eif4g2	0.00767087	0.122948	0.936	0.921	0.0118698
Tmed2	0.0166113	0.122937	0.864	0.831	0.0221535
Rpp30	0.016127	0.122848	0.324	0.23	0.0216875
Ptpa	0.00475471	0.122813	0.458	0.392	0.0080942
Slc29a1	0.0212396	0.122808	0.729	0.665	0.0269627
Fkbp11	0.00648678	0.122759	0.477	0.39	0.0104293
Sumo1	0.0111764	0.122656	0.896	0.85	0.0163191
Clpp	0.0047291	0.122627	0.549	0.508	0.00806959
Pea15a	0.00991177	0.122507	0.649	0.618	0.0148165
Ap2m1	0.0149764	0.122445	0.814	0.803	0.020425
Mdfi	0.00390327	0.122398	0.474	0.392	0.00690468
Thrap3	0.0235876	0.122379	0.688	0.638	0.029247
Ppib	0.000822763	0.122326	0.974	0.963	0.00189275
Mrpl27	0.00512924	0.122246	0.483	0.407	0.00862023
Rrp9	0.0115806	0.122238	0.354	0.26	0.0167403
Ubqln1	0.00521539	0.122178	0.407	0.323	0.00873457
Mrpl49	0.00418102	0.12204	0.457	0.376	0.00728031
Pyurf	0.0045512	0.122024	0.43	0.335	0.00784933
Eloc	0.0081824	0.121972	0.766	0.707	0.0125423
Ndufb5	0.00531374	0.121895	0.947	0.933	0.00885827
0610037L13Rik	0.00609083	0.121798	0.554	0.488	0.00986561
Pfdn6	0.00908039	0.121686	0.619	0.591	0.0137873
Nxf1	0.0119197	0.121686	0.784	0.705	0.017174
Mrps10	0.00410309	0.121561	0.53	0.411	0.00716184
Nop14	0.00659685	0.121529	0.439	0.362	0.0105695
Coa3	0.0109459	0.121475	0.847	0.783	0.0160473
Pih1d1	0.0054601	0.121464	0.437	0.366	0.00905013
Sae1	0.0149292	0.121314	0.749	0.736	0.0203797
Tubg1	0.0181205	0.121227	0.517	0.435	0.0236859
Ctbp1	0.011229	0.121101	0.72	0.675	0.0163464
Sfrp1	0.469213	0.121001	0.113	0.061	0.469862
Cenph	0.21718	0.120922	0.2	0.132	0.221465
Rpl39	2.61e-06	0.120874	1	0.998	1.31e-05
S100a16	0.00622135	0.120844	0.974	0.963	0.010036
Tspo	0.0276947	0.120814	0.711	0.657	0.0331741
Gmppb	0.0176229	0.12075	0.316	0.23	0.0231822
Hdgfl2	0.00591233	0.120528	0.528	0.463	0.00967777
Gjc1	0.0104686	0.12043	0.504	0.402	0.0154812
Lap3	0.0147423	0.120371	0.635	0.6	0.0202392
Cdca3	0.232633	0.12024	0.194	0.11	0.236717
Ak6	0.00899067	0.120216	0.507	0.423	0.0136798
Yeats4	0.00925247	0.12014	0.644	0.593	0.0139899
Kpna2	0.211421	0.120054	0.188	0.085	0.216049
Gm47283	0.047245	0.120051	0.759	0.742	0.0519875
Glrx3	0.0140513	0.120042	0.893	0.89	0.0194812
Mrps14	0.0154097	0.120016	0.788	0.793	0.0209114
Ube2j2	0.00696261	0.119936	0.596	0.535	0.0109988
Comt	0.00938947	0.119911	0.685	0.65	0.0141674
Grwd1	0.0371377	0.119755	0.324	0.274	0.0422471
Crtap	0.00537911	0.119693	0.467	0.38	0.00892611
Anapc2	0.00704473	0.119693	0.464	0.39	0.0111043
Prelid3b	0.0073893	0.119691	0.52	0.453	0.0115593
Cct2	0.0236648	0.119631	0.915	0.921	0.0293093
Blmh	0.0130389	0.119612	0.773	0.74	0.0183713
Prdx4	0.0473377	0.119514	0.815	0.807	0.0520499
Nsd2	0.0244104	0.119419	0.393	0.343	0.0300611
Prpf40a	0.0206038	0.11934	0.772	0.701	0.0262676
Prep	0.0191594	0.119187	0.316	0.222	0.0247533
Prmt7	0.00621758	0.119159	0.405	0.319	0.010036
Ednrb	0.0179696	0.119144	0.859	0.833	0.0235526
Spcs3	0.00779466	0.119132	0.381	0.283	0.0120372
Pfdn2	0.0143411	0.11913	0.761	0.703	0.01982
Rhno1	0.0143761	0.119102	0.328	0.242	0.0198495
Zfp207	0.019615	0.118924	0.697	0.679	0.0252069
Ehd1	0.00637433	0.118891	0.52	0.437	0.0102599
Fasn	0.0608093	0.118848	0.248	0.126	0.0651274
Ppp2r2a	0.0183373	0.118779	0.649	0.591	0.0238616
Tusc2	0.0157692	0.118755	0.325	0.211	0.0212854
Haus8	0.102944	0.11873	0.224	0.154	0.107166
Smim19	0.00667789	0.118725	0.407	0.313	0.0106655
Tubb2a	0.0229898	0.118589	0.592	0.559	0.0286284
Ccdc58	0.00969053	0.118588	0.442	0.37	0.0145157
Emc3	0.00687102	0.118498	0.602	0.547	0.0108779
Cpe	0.0275997	0.118428	0.354	0.266	0.0331156
Sfr1	0.00816755	0.118416	0.924	0.927	0.0125328
Stk16	0.00524634	0.118367	0.516	0.423	0.00876611
Sssca1	0.00794126	0.118344	0.52	0.451	0.0122115
Atad3a	0.016144	0.118309	0.422	0.339	0.0216902
Chchd3	0.00760817	0.118287	0.601	0.547	0.0118131
Psma2	0.0112583	0.118161	0.914	0.87	0.0163726
Klhdc4	0.00944513	0.118119	0.357	0.268	0.0142218
Chchd4	0.011004	0.118119	0.365	0.28	0.0161162
Chtf8	0.00427845	0.118116	0.458	0.35	0.00742316
Rrp15	0.0154198	0.118021	0.513	0.439	0.0209114
Sf3b2	0.021903	0.118009	0.864	0.829	0.02768
Praf2	0.0242449	0.118009	0.316	0.238	0.0298828
Rps27	2.8e-05	0.117941	1	0.998	0.000105649
Ubtf	0.0130814	0.117941	0.654	0.606	0.0183953
Trim16	0.0430337	0.117938	0.266	0.177	0.0480847
Mgat2	0.0127614	0.117927	0.673	0.593	0.018033
Acat1	0.0151258	0.117767	0.723	0.671	0.0205898
Dscc1	0.337087	0.117766	0.156	0.059	0.339197
Tmed9	0.00599754	0.117734	0.924	0.923	0.00979508
Flna	0.0146941	0.117492	0.685	0.602	0.0202306
Exo1	0.333209	0.117489	0.172	0.085	0.335761
Txn2	0.0122391	0.117458	0.637	0.602	0.0174311
Ppil1	0.0221138	0.117321	0.525	0.447	0.0278492
Cd3eap	0.0469558	0.117257	0.34	0.299	0.0517479
Mrps17	0.010761	0.117053	0.622	0.557	0.0158404
Dynlrb1	0.0153047	0.116811	0.856	0.833	0.0207943
Idh2	0.0278374	0.116796	0.915	0.915	0.0333173
Nono	0.0239331	0.116576	0.88	0.88	0.0295488
Szrd1	0.00598685	0.116562	0.454	0.341	0.00978867
Vdac1	0.0230941	0.116537	0.868	0.862	0.0287195
Mrps24	0.0161006	0.116483	0.837	0.795	0.0216722
Haus4	0.0237593	0.11646	0.352	0.293	0.0293739
Mpp1	0.0213265	0.116448	0.635	0.596	0.0270459
Atp5d	0.00488373	0.116436	0.976	0.974	0.00829432
Snw1	0.0138177	0.116329	0.738	0.669	0.0192127
Emid1	0.0226681	0.116251	0.741	0.679	0.0283254
Smarca5	0.0461258	0.116224	0.758	0.713	0.0510849
Bcl7c	0.0184392	0.116153	0.635	0.573	0.0239511
Taf10	0.0254328	0.116036	0.788	0.778	0.0310036
Emp3	0.158017	0.116031	0.622	0.591	0.162164
Mpp6	0.0622508	0.115867	0.688	0.683	0.0664775
Hmcn1	0.188541	0.115805	0.198	0.14	0.192805
Cttn	0.0071361	0.115709	0.487	0.407	0.0112117
Pycr2	0.0108776	0.115704	0.519	0.484	0.0159634
Nudcd2	0.0148771	0.11565	0.691	0.581	0.0203663
Psmg2	0.00782826	0.11561	0.428	0.352	0.0120634
Mcrip1	0.0179587	0.115606	0.766	0.703	0.0235526
Exosc9	0.0134232	0.115591	0.374	0.287	0.0187484
Psmd4	0.0187845	0.115404	0.856	0.805	0.0243777
Tmco1	0.016392	0.115403	0.7	0.65	0.0219622
Alcam	0.384431	0.115376	0.129	0.065	0.3863
Polr2f	0.0288857	0.115365	0.784	0.785	0.0342603
Srpr	0.0134985	0.115281	0.53	0.467	0.0188354
Glo1	0.0159772	0.11525	0.691	0.634	0.0215462
Oaf	0.0125973	0.115235	0.405	0.331	0.0178359
Cnpy2	0.0150708	0.115231	0.818	0.803	0.0205343
Bin1	0.016651	0.115185	0.575	0.526	0.022186
Rpa1	0.0446531	0.115183	0.319	0.248	0.0496642
Mpdu1	0.0110908	0.115092	0.517	0.439	0.0162268
Arpc4	0.0148466	0.115064	0.726	0.695	0.0203486
H2afj	0.0261617	0.115033	0.726	0.687	0.0317318
Vars	0.0160578	0.114997	0.43	0.372	0.0216346
Pabpc4	0.0101016	0.114982	0.399	0.297	0.0150071
Aurkb	0.343147	0.114825	0.168	0.112	0.345055
Pelp1	0.0175828	0.114788	0.34	0.244	0.0231504
Lsm8	0.0383278	0.114737	0.598	0.575	0.0434643
Capn2	0.0157073	0.114693	0.675	0.622	0.0212217
Rcc1	0.0483363	0.114684	0.274	0.165	0.0529467
Mrpl44	0.0136452	0.114586	0.384	0.291	0.0190035
Exoc7	0.0107909	0.114578	0.452	0.4	0.0158684
Atp5c1	0.00763283	0.114519	0.961	0.949	0.0118252
Eif2s3y	0.0993662	0.11451	0.272	0.183	0.103515
Mrpl52	0.0222061	0.114454	0.873	0.833	0.0279411
Tcf19	0.215204	0.114311	0.192	0.124	0.219605
Coq5	0.0101494	0.114272	0.349	0.28	0.0150628
Ddx46	0.0183338	0.11411	0.716	0.63	0.0238616
Tpr	0.0553144	0.113956	0.909	0.886	0.0595978
Med8	0.0121937	0.113928	0.655	0.589	0.0174179
Hirip3	0.0552263	0.113866	0.354	0.27	0.0595473
Polr1d	0.0214062	0.113843	0.902	0.888	0.0271233
Ubl4a	0.010458	0.113768	0.446	0.364	0.0154812
Mrpl55	0.00890159	0.113711	0.455	0.38	0.0135585
Cyb5r3	0.0303499	0.113631	0.713	0.64	0.0355045
Faap100	0.0132279	0.113621	0.375	0.285	0.0185293
Hsbp1	0.030596	0.113514	0.861	0.866	0.0357545
2010107E04Rik	0.0170729	0.113507	0.905	0.88	0.0226439
Paics	0.0310345	0.113286	0.728	0.709	0.0360989
Cd34	0.00767803	0.113233	0.955	0.935	0.0118698
Hmg20b	0.0301717	0.113214	0.835	0.813	0.035437
Rpl4	0.00111059	0.113186	0.997	0.998	0.00242022
Kpna4	0.0102281	0.113168	0.56	0.482	0.015164
Upp1	0.0180967	0.113072	0.569	0.482	0.0236763
Rps29	1.37e-08	0.11301	1	1	1.33e-07
Rcc2	0.0247215	0.112982	0.641	0.587	0.0303152
Mrpl41	0.0120786	0.112909	0.526	0.472	0.0173735
Basp1	0.14358	0.11289	0.345	0.274	0.148148
Ap2a1	0.00872767	0.11286	0.443	0.374	0.0133076
Marcks	0.0342657	0.112849	0.982	0.98	0.0393824
Dusp12	0.0224735	0.112845	0.321	0.236	0.0281795
Arf4	0.0522332	0.112797	0.912	0.902	0.0568282
Dnttip1	0.0145198	0.112704	0.57	0.526	0.0200097
Ctnnb1	0.00726892	0.112663	0.956	0.931	0.0113833
Gna11	0.0365766	0.112607	0.637	0.604	0.0417071
Sdhd	0.0189955	0.112594	0.711	0.634	0.0246075
Tmem165	0.0188984	0.112536	0.781	0.703	0.0245035
Gnb2	0.01214	0.112516	0.965	0.976	0.0174057
Ssbp4	0.0276206	0.112284	0.821	0.799	0.0331156
Plvap	0.0573556	0.11226	0.964	0.961	0.0617052
Cdc42se1	0.0112	0.112179	0.526	0.453	0.0163207
Stx6	0.0148501	0.112168	0.646	0.587	0.0203486
Mrps34	0.0169854	0.112168	0.62	0.571	0.0225692
Peg3	0.145123	0.112154	0.528	0.496	0.149567
Emc8	0.022313	0.1121	0.625	0.583	0.0280268
Ube2f	0.011478	0.112025	0.428	0.348	0.0166402
Ndufaf4	0.0198829	0.111995	0.422	0.352	0.0255278
Ndufs7	0.0280394	0.111969	0.838	0.835	0.0334215
Aida	0.0131138	0.111966	0.437	0.374	0.018423
Nmi	0.0162201	0.111868	0.481	0.419	0.021752
Mgat4b	0.0353071	0.111803	0.843	0.837	0.0404828
Wisp1	0.0524192	0.111799	0.277	0.197	0.0569877
Tmem208	0.0174347	0.111793	0.658	0.612	0.0230604
Vamp8	0.0251644	0.111761	0.716	0.673	0.0307281
H3f3a	0.0096469	0.111737	0.997	0.994	0.0144706
Zfp706	0.0300553	0.111731	0.805	0.785	0.035329
Brms1	0.0114883	0.111702	0.381	0.289	0.0166402
Sf3b6	0.0245955	0.111634	0.841	0.799	0.0301863
Commd1	0.0297538	0.111595	0.779	0.772	0.03506
Ywhab	0.0220219	0.111578	0.952	0.945	0.0277818
Oser1	0.0155987	0.111435	0.498	0.429	0.0210947
Rpl7a	0.00293816	0.111384	0.997	0.994	0.00548582
Naa38	0.0164895	0.111382	0.676	0.644	0.022033
Orai1	0.0131775	0.111287	0.575	0.494	0.0184765
Rad23a	0.0226457	0.111221	0.345	0.244	0.0283218
Prpf38b	0.0414665	0.111186	0.759	0.705	0.0465854
S100a10	0.0781715	0.111185	0.991	0.982	0.0825048
Ntan1	0.0328374	0.11117	0.769	0.748	0.0379173
Gnb1	0.0355897	0.111152	0.88	0.894	0.0407745
Snf8	0.0161844	0.111099	0.703	0.602	0.0217244
Nudt4	0.0369712	0.111051	0.657	0.638	0.0420908
Elovl1	0.00826438	0.111034	0.499	0.402	0.0126546
Tmem109	0.0126653	0.111009	0.516	0.437	0.0179147
Ppdpf	0.0258675	0.110999	0.849	0.799	0.031454
Exoc3l	0.0131669	0.110967	0.542	0.453	0.0184765
Hspa4	0.0357766	0.110955	0.732	0.683	0.0409158
Tsn	0.0314704	0.110921	0.784	0.74	0.0365177
Tnfaip1	0.0273149	0.110911	0.796	0.754	0.032855
Mrps33	0.0357914	0.110836	0.797	0.793	0.0409158
Mad2l2	0.0765371	0.110758	0.259	0.159	0.0808388
Timp1	0.0741346	0.110746	0.268	0.173	0.0784158
Pspc1	0.0528173	0.110739	0.283	0.197	0.0573774
Mycbp	0.0104848	0.110681	0.377	0.268	0.0154812
Impa1	0.00996468	0.110641	0.442	0.35	0.0148648
2310011J03Rik	0.012164	0.110641	0.451	0.37	0.0174057
Pmvk	0.0152402	0.11062	0.466	0.38	0.0207261
Ssr3	0.0183889	0.110478	0.71	0.663	0.0239072
Emp1	0.0283539	0.110477	0.693	0.64	0.0337402
Abracl	0.0839269	0.110403	0.767	0.752	0.0880655
Rtn4	0.0513796	0.110362	0.871	0.872	0.0559837
Slc25a3	0.0331702	0.110255	0.98	0.99	0.0382449
Clptm1l	0.0122282	0.11019	0.582	0.453	0.0174311
Sar1a	0.0175275	0.11019	0.675	0.606	0.0231408
Pbdc1	0.0175454	0.11019	0.523	0.435	0.0231433
Polr2a	0.0231026	0.11019	0.546	0.514	0.0287195
Sumf2	0.0256864	0.11019	0.334	0.252	0.0312601
Ykt6	0.0289262	0.11019	0.318	0.232	0.0342803
Hmgcr	0.0299513	0.11019	0.292	0.222	0.0352641
Eid1	0.0359192	0.11019	0.9	0.882	0.0410222
Dad1	0.0437891	0.11019	0.92	0.931	0.0488262
Cenpm	0.275761	0.11019	0.228	0.128	0.279235
Pimreg	0.436879	0.11019	0.147	0.085	0.43809
Chchd1	0.0401793	0.109951	0.759	0.72	0.0452447
Nt5c	0.030745	0.109926	0.744	0.713	0.0358774
Exosc7	0.0218436	0.109855	0.613	0.555	0.0276533
Cdipt	0.011859	0.109834	0.604	0.528	0.0171198
Slc39a7	0.0122286	0.109813	0.59	0.518	0.0174311
Tgfb1i1	0.0175698	0.109771	0.452	0.398	0.0231504
Taf1d	0.0426803	0.109714	0.788	0.742	0.0478006
Cbfb	0.0175088	0.109695	0.368	0.287	0.0231372
Stard7	0.018229	0.109679	0.349	0.262	0.0237848
Cdt1	0.0950215	0.109675	0.284	0.217	0.0992036
Psat1	0.0580453	0.109663	0.307	0.215	0.0623083
Ttc14	0.0425636	0.109626	0.713	0.697	0.0477438
Prps1	0.107379	0.10962	0.25	0.161	0.111622
Morf4l2	0.026255	0.109508	0.818	0.744	0.0318182
Edf1	0.0245059	0.109491	0.911	0.911	0.0301294
Yaf2	0.0177313	0.109485	0.593	0.524	0.0232824
Ash2l	0.0193943	0.109402	0.501	0.465	0.0249899
Snrpb2	0.0322378	0.109397	0.728	0.671	0.0373783
Timm9	0.0135134	0.109326	0.474	0.384	0.0188381
Pcmt1	0.0302661	0.109259	0.666	0.622	0.0354903
Dnajb11	0.019521	0.109178	0.661	0.585	0.0251306
Cenpx	0.0428694	0.109038	0.669	0.65	0.0479382
Myzap	0.0123836	0.109006	0.505	0.409	0.0175735
Nxt1	0.0228374	0.108974	0.48	0.423	0.0284631
Flywch1	0.0282697	0.108934	0.666	0.61	0.0336678
Slc44a2	0.0140556	0.108899	0.475	0.378	0.0194812
Ndufa11	0.0409815	0.108867	0.864	0.852	0.0460764
Tufm	0.013822	0.108847	0.461	0.343	0.0192127
Snu13	0.0944967	0.108846	0.814	0.801	0.0987269
2022-09-11	0.0505887	0.108827	0.791	0.744	0.0551763
Arl1	0.0612335	0.108786	0.803	0.785	0.0654877
Usmg5	0.0467145	0.108729	0.905	0.856	0.0515606
Pno1	0.0296421	0.108707	0.352	0.291	0.0350036
Ccnd1	0.104814	0.108612	0.908	0.884	0.109033
Pomp	0.0481359	0.108546	0.949	0.961	0.0528071
Ppig	0.0677778	0.108463	0.855	0.823	0.0719021
Strap	0.0506006	0.108403	0.737	0.732	0.0551763
Magt1	0.0247611	0.108379	0.593	0.528	0.0303381
Cops9	0.0249169	0.108352	0.753	0.707	0.0305031
Anapc4	0.0112922	0.108331	0.446	0.362	0.0164054
Copb2	0.0377701	0.108283	0.72	0.697	0.0428654
Sucla2	0.0164641	0.108275	0.539	0.465	0.022033
Snx6	0.0306149	0.108268	0.719	0.665	0.0357545
Anxa5	0.0225144	0.108226	0.933	0.937	0.0282064
Cops8	0.0223664	0.10816	0.641	0.571	0.0280696
Sulf2	0.0612801	0.108128	0.448	0.409	0.0654892
Dpp3	0.0165733	0.108086	0.492	0.423	0.0221232
Usp15	0.0133128	0.108054	0.486	0.396	0.0186123
Srpk1	0.0290888	0.108017	0.664	0.61	0.0344447
Ankrd54	0.0384853	0.107995	0.301	0.207	0.0436087
Pdrg1	0.0122824	0.107938	0.46	0.37	0.017463
Mmp2	0.138111	0.107928	0.225	0.148	0.142646
Pdcd10	0.0207988	0.10792	0.722	0.671	0.0264695
Tdg	0.0144932	0.10785	0.425	0.321	0.019992
Psmg3	0.0171106	0.10781	0.393	0.309	0.0226731
Plekhj1	0.0181395	0.107706	0.496	0.429	0.0236894
Ube2d3	0.0481989	0.107564	0.914	0.907	0.0528363
Cdkn1c	0.78207	0.107439	0.859	0.862	0.78207
Vti1b	0.0166899	0.107251	0.481	0.419	0.0222174
Gpx3	0.164732	0.107236	0.198	0.13	0.168935
Birc6	0.0287516	0.107223	0.56	0.512	0.0341293
Taldo1	0.0340222	0.107191	0.911	0.884	0.0391336
Ncbp1	0.0484015	0.107146	0.328	0.25	0.0529781
Gm8186	0.0254715	0.107143	0.451	0.339	0.0310246
Farsb	0.0149002	0.107078	0.445	0.376	0.0203774
Pola2	0.0236783	0.106884	0.398	0.323	0.0293093
Ndufaf2	0.0375909	0.106733	0.576	0.504	0.0426955
Wdr82	0.0297237	0.106686	0.346	0.262	0.0350531
2022-03-02	0.0138939	0.106573	0.862	0.791	0.0192941
Cdk13	0.0219747	0.10655	0.437	0.37	0.0277464
Mxra8	0.0747789	0.106543	0.3	0.213	0.0790395
Memo1	0.0325809	0.106485	0.321	0.238	0.0376855
Ica1	0.0212243	0.106438	0.477	0.429	0.0269627
Parl	0.0207748	0.106312	0.472	0.384	0.0264623
Ahsa2	0.0108278	0.106219	0.478	0.376	0.0159064
Nme4	0.0309177	0.106089	0.405	0.309	0.0360208
Mtch1	0.00912786	0.106073	0.976	0.961	0.0138238
B3galt6	0.171391	0.106066	0.219	0.134	0.175515
Ttc1	0.0199	0.106032	0.427	0.378	0.0255278
Mdh2	0.0590177	0.105916	0.912	0.89	0.0633051
Rad51	0.334843	0.10566	0.191	0.11	0.337173
Rpl13a	0.0454907	0.105645	0.935	0.921	0.0505181
Snrpd2	0.117496	0.105513	0.927	0.925	0.121963
Traf4	0.022786	0.105496	0.446	0.382	0.0284482
Spns1	0.0119281	0.105347	0.458	0.386	0.017174
Commd7	0.0326663	0.105319	0.644	0.61	0.0377541
Tgfbi	0.484913	0.105258	0.127	0.063	0.485249
Ube2i	0.0532544	0.105219	0.912	0.913	0.0577655
U2af2	0.0310052	0.105184	0.663	0.596	0.0360938
Naa15	0.0345521	0.105181	0.567	0.516	0.0396801
Etfa	0.0263982	0.105127	0.561	0.559	0.0319383
Aig1	0.031101	0.105111	0.33	0.262	0.0361471
Anp32a	0.0193429	0.105111	0.964	0.953	0.0249457
Mrpl40	0.0183211	0.105049	0.49	0.413	0.0238616
Hnrnpa1	0.0943791	0.105036	0.98	0.963	0.0986752
Pgp	0.0984884	0.104986	0.648	0.634	0.102675
Naa50	0.0276231	0.104933	0.551	0.49	0.0331156
Crcp	0.0245716	0.104918	0.339	0.252	0.0301826
Rhoa	0.0786577	0.104904	0.98	0.967	0.0829575
Stoml2	0.0408466	0.104885	0.607	0.557	0.0459604
Txndc12	0.0245074	0.104873	0.558	0.522	0.0301294
Capzb	0.0695785	0.104852	0.902	0.89	0.0737044
Arfgap2	0.0203036	0.104799	0.442	0.396	0.0259994
Abce1	0.018047	0.104683	0.492	0.419	0.0236326
Snx3	0.182843	0.104651	0.933	0.943	0.18711
Prodh	0.267592	0.104588	0.174	0.081	0.271153
Sptlc2	0.0250708	0.104563	0.572	0.508	0.0306656
Aldh2	0.0540662	0.104556	0.354	0.323	0.0585582
Ubash3b	0.0548203	0.104376	0.339	0.293	0.0591847
Rpp21	0.020416	0.10431	0.504	0.415	0.0260741
A430005L14Rik	0.0421159	0.104244	0.398	0.356	0.0472782
Oxct1	0.0360725	0.104179	0.51	0.455	0.0411648
Tpx2	0.415239	0.104171	0.191	0.167	0.416679
Abcg2	0.066098	0.104103	0.753	0.738	0.0703781
Nup62	0.0346249	0.104077	0.38	0.335	0.0397321
Pdcd5	0.0809463	0.104074	0.879	0.886	0.0851849
Ppp1cc	0.0870067	0.103994	0.805	0.772	0.091231
Rac1	0.0434364	0.10399	0.896	0.911	0.0484973
Prpf38a	0.0240919	0.103984	0.555	0.49	0.0297196
Shcbp1	0.411686	0.103975	0.153	0.081	0.4134
Apoo	0.0547613	0.10394	0.313	0.256	0.0591847
Akap12	0.266963	0.103937	0.59	0.539	0.270705
Trip13	0.29683	0.10377	0.203	0.122	0.300359
Ddx27	0.0237712	0.103693	0.52	0.453	0.0293739
Dph3	0.0372431	0.103658	0.637	0.579	0.0423336
Ecscr	0.0129113	0.103643	0.941	0.904	0.0182175
Ap3s2	0.0655655	0.103545	0.284	0.193	0.0698625
Dtd1	0.0300527	0.10352	0.399	0.317	0.035329
Cyp51	0.212319	0.103456	0.224	0.142	0.216814
Lman2	0.0425981	0.103424	0.691	0.673	0.0477455
Lima1	0.0279433	0.103408	0.569	0.51	0.0334165
Mrpl34	0.0471456	0.103372	0.817	0.805	0.0519176
Matr3	0.0461424	0.103259	0.747	0.713	0.0510849
Bak1	0.0270176	0.103221	0.534	0.486	0.0325787
Lsm5	0.0535138	0.103114	0.611	0.598	0.0580034
Bckdk	0.0302259	0.103073	0.433	0.372	0.0354719
Ppil2	0.0328599	0.102917	0.599	0.524	0.0379173
Gskip	0.0357978	0.102917	0.325	0.248	0.0409158
Ifrd2	0.129485	0.102885	0.313	0.285	0.134024
Akt1	0.0491464	0.102857	0.75	0.722	0.0537527
Ilf3	0.0394095	0.102817	0.405	0.339	0.044447
Ak2	0.0608516	0.102735	0.805	0.78	0.0651274
Mrpl21	0.0461825	0.102665	0.673	0.646	0.0510903
Fxyd6	0.333209	0.10262	0.262	0.234	0.335761
Exoc3l2	0.0468703	0.102566	0.439	0.396	0.0516931
Ywhaz	0.091608	0.102554	0.84	0.825	0.0958473
Zfp428	0.0563515	0.102432	0.303	0.24	0.0606701
Fxn	0.0438095	0.10243	0.34	0.295	0.0488262
Mettl9	0.0474936	0.102384	0.75	0.726	0.0521816
Krcc1	0.0427296	0.102362	0.608	0.553	0.0478188
Dnajc10	0.0228292	0.102179	0.461	0.358	0.0284631
Sf3b3	0.0663798	0.101929	0.708	0.665	0.0706261
Mrpl36	0.0385441	0.101891	0.592	0.561	0.0436411
Rps3a1	0.000180408	0.101864	1	1	0.000522101
Gorasp2	0.0271745	0.101648	0.511	0.437	0.0327407
Fam32a	0.0520662	0.101637	0.699	0.665	0.0566891
Ergic2	0.0250959	0.101606	0.638	0.545	0.0306705
Rcl1	0.0685153	0.101494	0.29	0.201	0.0726312
Cdc20	0.226738	0.101494	0.227	0.152	0.230887
Nras	0.0456728	0.101415	0.64	0.559	0.0506814
Klhdc10	0.0262911	0.101403	0.443	0.362	0.0318354
Timm8b	0.045996	0.101387	0.714	0.687	0.0510009
Scd2	0.0530468	0.101295	0.581	0.52	0.0575834
Klc1	0.0205765	0.101187	0.48	0.39	0.0262559
Ctps	0.0500239	0.10114	0.324	0.266	0.0546298
Evl	0.0233886	0.101118	0.501	0.413	0.0290251
Map1s	0.0308302	0.101058	0.346	0.246	0.0359479
Bod1	0.0280152	0.101037	0.576	0.494	0.0334215
Smarcc2	0.0268663	0.101036	0.393	0.311	0.032444
Zfp398	0.114036	0.101016	0.244	0.173	0.118457
Drap1	0.0822594	0.100999	0.84	0.811	0.0863784
Psmb1	0.0875316	0.100984	0.959	0.957	0.0917149
Cenps	0.219255	0.100984	0.216	0.144	0.223424
Mcts1	0.0333783	0.100966	0.508	0.457	0.0384542
Rpap3	0.0252226	0.100913	0.418	0.331	0.0307733
Adh5	0.0641103	0.100882	0.817	0.807	0.0683622
Fam96b	0.0392778	0.100878	0.608	0.585	0.0443331
Tubgcp2	0.0388716	0.100819	0.36	0.276	0.0439431
Coq2	0.0268834	0.100763	0.368	0.297	0.032444
Fbxo5	0.438236	0.100748	0.175	0.138	0.439147
Mrpl58	0.054785	0.100707	0.769	0.722	0.0591847
Mrpl22	0.0260088	0.100621	0.51	0.443	0.0315993
Magohb	0.0264588	0.100593	0.404	0.303	0.0319849
Fhl2	0.156431	0.10059	0.206	0.167	0.16065
Mum1	0.0465298	0.100497	0.587	0.533	0.0513959
Man1a2	0.0294518	0.10047	0.555	0.494	0.0348176
Nifk	0.0339064	0.10045	0.457	0.388	0.0390315
Shisa5	0.067102	0.100446	0.7	0.642	0.0713369
Rbmx	0.0280399	0.100364	0.421	0.339	0.0334215
Zrsr2	0.0395292	0.100328	0.616	0.559	0.0445473
Myc	0.128993	0.100273	0.239	0.165	0.13361
Upf3a	0.026143	0.10024	0.573	0.506	0.0317318
Eef1akmt1	0.0287219	0.100204	0.443	0.366	0.034122
0610012G03Rik	0.0671464	0.1002	0.826	0.772	0.0713369
Bcat2	0.0294209	0.100183	0.386	0.305	0.0348096
Tars	0.0285736	0.100149	0.431	0.354	0.0339737
Mri1	0.0548491	0.100067	0.362	0.307	0.0591847
Cnot6l	4.55e-05	-0.100314	0.49	0.587	0.000160342
3110002H16Rik	0.00570873	-0.100421	0.197	0.301	0.00940296
Clip1	0.000404952	-0.10057	0.467	0.51	0.00104079
Nectin2	3.52e-06	-0.101067	0.868	0.894	1.72e-05
Kdr	0.00171031	-0.101256	0.932	0.923	0.00344202
Pnrc1	4.8e-06	-0.101416	0.767	0.848	2.25e-05
Ppp1r14a	0.232791	-0.102084	0.067	0.157	0.236717
Rsrp1	5.49e-06	-0.103302	0.853	0.894	2.53e-05
Bcam	0.00118182	-0.103475	0.402	0.453	0.00254858
Sash1	1.33e-05	-0.104001	0.7	0.736	5.51e-05
Kbtbd11	0.00673502	-0.10422	0.224	0.301	0.0107094
Plat	0.00149838	-0.104407	0.415	0.457	0.00307976
Utrn	0.000756369	-0.105506	0.436	0.508	0.00176527
Adgrl4	4.45e-05	-0.10561	0.767	0.787	0.000157321
Cds2	0.000278231	-0.105733	0.345	0.421	0.000758193
Tmem252	0.0121679	-0.106117	0.306	0.356	0.0174057
Elf1	0.000188063	-0.106545	0.505	0.557	0.000539935
S1pr1	0.000215367	-0.106933	0.667	0.717	0.000609856
Kctd12b	0.00761501	-0.107202	0.554	0.62	0.0118131
Gse1	0.00220447	-0.107307	0.21	0.303	0.0042817
Klf9	0.00931777	-0.107994	0.224	0.278	0.0140739
Zfp36l2	0.000153605	-0.108134	0.51	0.585	0.000457814
Crebrf	0.0280261	-0.10961	0.145	0.244	0.0334215
Tcf4	0.000240961	-0.109619	0.952	0.955	0.000669234
Rapgef4	0.000177768	-0.109681	0.467	0.547	0.000517673
Eif4a2	3.63e-06	-0.10996	0.702	0.783	1.77e-05
Cdkn1a	0.14966	-0.110579	0.097	0.154	0.153805
Ly6e	3.68e-05	-0.110775	0.874	0.902	0.000134818
Ankrd12	0.00307969	-0.111144	0.377	0.433	0.00569132
2900026A02Rik	0.000503686	-0.111803	0.389	0.441	0.00126096
Rps18	2.09e-39	-0.112373	0.998	0.998	3.36e-37
Fcho2	0.000177805	-0.112615	0.477	0.565	0.000517673
Kdm7a	0.00149454	-0.112954	0.262	0.341	0.00307624
Pgm2	0.00307618	-0.113446	0.191	0.295	0.00569132
Hdac7	8.01e-05	-0.114309	0.625	0.679	0.000262828
Neat1	0.00269378	-0.114348	0.316	0.4	0.00508865
Cttnbp2	0.000310135	-0.114383	0.331	0.396	0.000840385
Mgll	0.0123877	-0.115237	0.254	0.315	0.0175735
Klhl24	8.67e-05	-0.11589	0.486	0.571	0.000281427
Loxl2	0.0011044	-0.116738	0.221	0.311	0.002414
Ackr2	0.131639	-0.116792	0.083	0.169	0.136156
Kcnj8	0.0191575	-0.116913	0.174	0.266	0.0247533
Fam43a	5.14e-05	-0.117027	0.602	0.669	0.000177222
Nudt9	1.09e-05	-0.117868	0.505	0.593	4.66e-05
Acvrl1	0.000259442	-0.118234	0.47	0.537	0.000711008
Srgn	0.00382565	-0.119212	0.357	0.441	0.00678397
Zcchc6	4.51e-05	-0.121131	0.567	0.624	0.000159199
Colgalt1	3.25e-07	-0.122511	0.592	0.695	2.19e-06
Fam13c	0.000454022	-0.122536	0.269	0.35	0.00115395
Ttc36	0.325109	-0.123425	0.05	0.122	0.328285
Psmb8	0.00040471	-0.124153	0.342	0.455	0.00104079
Clec14a	0.0094344	-0.124414	0.793	0.856	0.0142204
Ier2	2.41e-06	-0.124986	0.859	0.884	1.22e-05
Zfp36	0.000906893	-0.126139	0.23	0.305	0.00206009
Sp100	0.000629981	-0.126315	0.251	0.348	0.00152184
Zcchc11	6.36e-06	-0.12694	0.56	0.612	2.87e-05
Gm32688	0.0011236	-0.128664	0.194	0.297	0.00244488
Nfkbia	9.16e-05	-0.130116	0.762	0.801	0.000292519
AY036118	3.09e-06	-0.130493	0.992	0.996	1.52e-05
Ctsl	3.54e-07	-0.132963	0.758	0.803	2.33e-06
Atp2b4	0.000259022	-0.13323	0.234	0.35	0.000711008
Trp53i11	4.22e-05	-0.133354	0.517	0.569	0.000149957
Nceh1	0.00283765	-0.133482	0.191	0.28	0.00532564
Xist	0.326695	-0.134166	0.38	0.368	0.329657
Mcf2l	0.00320386	-0.134615	0.18	0.291	0.00588323
Apobec3	9.67e-06	-0.134887	0.325	0.423	4.26e-05
Tmem255a	0.000213039	-0.135178	0.448	0.557	0.000605583
Ablim1	0.000548658	-0.136103	0.29	0.374	0.00135018
Rgcc	0.000712249	-0.136301	0.738	0.797	0.00168955
Bnip3	0.0958914	-0.136452	0.074	0.181	0.10004
2022-09-04	0.000464333	-0.137717	0.352	0.421	0.00117463
Plod2	0.000677173	-0.138872	0.192	0.287	0.00161428
4931406P16Rik	3.26e-07	-0.139262	0.59	0.705	2.19e-06
Ube2h	4.46e-06	-0.140042	0.405	0.504	2.14e-05
Lrrc8c	6.84e-07	-0.144771	0.631	0.699	4.13e-06
Tcf15	0.000123955	-0.145087	0.681	0.693	0.000376814
Egln1	3.63e-08	-0.145487	0.685	0.724	3.2e-07
Itga1	3.97e-05	-0.145675	0.298	0.402	0.000143927
Zdbf2	0.00234858	-0.146198	0.197	0.266	0.00450716
Kmt2e	3.73e-08	-0.14653	0.7	0.738	3.26e-07
Pim3	9.72e-07	-0.146774	0.584	0.657	5.58e-06
Vldlr	0.0812079	-0.148152	0.062	0.169	0.0853361
Fabp4	2.74e-09	-0.148766	0.995	0.998	3.12e-08
Phactr1	0.031297	-0.151349	0.097	0.173	0.0363457
Clk1	3.86e-09	-0.153673	0.707	0.778	4.23e-08
Cyr61	0.000359535	-0.154503	0.203	0.319	0.000947627
Arid5b	1.97e-05	-0.155354	0.437	0.524	7.87e-05
Clec2d	2.64e-05	-0.156083	0.519	0.624	0.000100786
Fxyd2	0.00590684	-0.156126	0.15	0.305	0.00967777
Dusp23	4.55e-06	-0.156276	0.307	0.402	2.16e-05
Tacc2	1.18e-07	-0.157891	0.348	0.463	9.05e-07
Grhpr	1.17e-08	-0.159793	0.38	0.516	1.15e-07
Pgk1	2.06e-12	-0.159832	0.87	0.888	4.8e-11
Adora2a	1.83e-07	-0.160127	0.345	0.449	1.36e-06
Plcb4	6.3e-06	-0.160424	0.315	0.431	2.85e-05
Sgk1	2.38e-05	-0.164951	0.797	0.86	9.18e-05
Camk2n1	2.38e-05	-0.167707	0.339	0.437	9.18e-05
Fam117b	9.19e-09	-0.171015	0.467	0.573	9.43e-08
Mxi1	4.68e-07	-0.173188	0.225	0.364	2.94e-06
Map4k5	9.37e-09	-0.173224	0.539	0.622	9.55e-08
Ifi44	0.000172731	-0.174163	0.508	0.547	0.000508013
Aldoa	8.01e-20	-0.174586	0.97	0.986	4.46e-18
Pdk1	1.01e-07	-0.176121	0.405	0.528	7.93e-07
Pfkl	5.22e-12	-0.176227	0.75	0.835	1.13e-10
Selenbp1	2.64e-07	-0.178296	0.315	0.402	1.84e-06
Malat1	1.58e-07	-0.179321	0.998	1	1.19e-06
Adamts1	9.02e-05	-0.179946	0.401	0.449	0.000288845
Slc2a1	8e-08	-0.180306	0.336	0.429	6.47e-07
Myo6	3.14e-08	-0.183357	0.498	0.608	2.8e-07
Gmfg	1.03e-09	-0.185913	0.834	0.868	1.35e-08
Gm10036	1.49e-10	-0.186076	0.362	0.496	2.39e-09
Prrg3	2.42e-08	-0.189053	0.384	0.49	2.21e-07
Ahnak	4.27e-06	-0.191872	0.421	0.508	2.07e-05
P4ha1	3.79e-10	-0.192594	0.377	0.494	5.69e-09
Lpar6	3.33e-09	-0.193842	0.51	0.657	3.7e-08
Id2	8.66e-07	-0.195989	0.466	0.61	5.03e-06
Pde4b	9.89e-07	-0.198513	0.29	0.409	5.62e-06
Timp3	1.75e-09	-0.200369	0.784	0.86	2.17e-08
Tnfsf10	1.54e-06	-0.202664	0.188	0.35	8.17e-06
Ndrg1	2.71e-08	-0.20383	0.348	0.443	2.45e-07
Snrk	9.41e-11	-0.209745	0.788	0.878	1.58e-09
Nrp2	2.53e-09	-0.21339	0.573	0.695	2.92e-08
Gm13305	1.94e-06	-0.218109	0.142	0.327	1.01e-05
Eif3j2	1.08e-12	-0.223449	0.29	0.457	2.61e-11
Esm1	0.0386781	-0.225161	0.222	0.264	0.0437586
Icam1	1.63e-08	-0.226911	0.498	0.608	1.54e-07
Sat1	6.76e-06	-0.229206	0.641	0.715	3.04e-05
Dusp1	6.39e-11	-0.236018	0.644	0.709	1.13e-09
Id1	4.4e-06	-0.242123	0.669	0.754	2.12e-05
Crlf2	4.24e-15	-0.24255	0.362	0.516	1.5e-13
Slc16a3	4.36e-07	-0.253033	0.179	0.309	2.78e-06
Acer2	2.6e-12	-0.259924	0.466	0.62	5.88e-11
Cebpd	2.96e-16	-0.267624	0.579	0.72	1.16e-14
Btg2	3.65e-13	-0.27696	0.587	0.699	9.44e-12
Smad7	6.18e-12	-0.278088	0.411	0.535	1.32e-10
Rflnb	3.64e-14	-0.286089	0.752	0.817	1.12e-12
Ankrd37	5.2e-13	-0.300338	0.313	0.47	1.3e-11
Jun	3.51e-15	-0.303197	0.852	0.896	1.27e-13
Fosb	6.89e-09	-0.309337	0.215	0.337	7.22e-08
8430408G22Rik	1.1e-05	-0.312026	0.281	0.388	4.72e-05
Alad	3.58e-33	-0.341895	0.567	0.772	4.71e-31
Junb	1.31e-18	-0.344176	0.652	0.776	6.31e-17
Flt1	5.93e-21	-0.350554	0.92	0.919	3.9e-19
Sparcl1	3.06e-06	-0.372467	0.64	0.778	1.51e-05
Edn1	2.31e-08	-0.387978	0.092	0.297	2.13e-07
Cyp26b1	4.23e-12	-0.404721	0.212	0.435	9.27e-11
Egr1	2.05e-20	-0.408766	0.39	0.585	1.24e-18
Rpl29	2.79e-165	-0.409024	0.979	0.994	4.04e-162
Gpihbp1	8.09e-14	-0.435022	0.844	0.911	2.3e-12
Fos	1.26e-16	-0.457757	0.359	0.541	5.21e-15
Ubc	3.35e-84	-0.479956	0.962	0.976	1.62e-81
Bst2	1.18e-51	-0.511107	0.912	0.98	2.13e-49

## Sheet: Cluster3_MutVsCTRL.DEGs
Gene	p_val	avg_logFC	pct.1	pct.2	p_val_adj
Rpl29	2.10074e-266	-0.400383	1	1	7.24125e-263
Uba52	1.33468e-165	0.580167	0.996	0.995	2.30031e-162
Rps2	9.75804e-140	0.367569	1	1	1.1212e-136
Gm10260	7.03404e-118	2.09484	0.585	0.016	6.06158e-115
Tpm3-rs7	3.09293e-107	0.838416	0.794	0.212	2.13227e-104
Rps18	6.152e-106	-0.150961	1	1	3.53432e-103
Eif3j1	5.09295e-83	0.758982	0.947	0.686	2.50791e-80
Smarca4	2.26605e-69	0.691872	0.949	0.695	9.76386e-67
Gm10076	4.36864e-54	0.438229	0.985	0.965	1.67319e-51
Erh	4.53864e-52	0.419954	0.989	0.987	1.56447e-49
Rps21	1.1663e-50	0.24219	1	1	3.65475e-48
Pebp1	1.22269e-46	0.31321	0.998	1	3.51218e-44
Ubc	2.0271e-43	-0.31678	0.994	0.989	5.37495e-41
Alad	3.71986e-40	-0.360403	0.779	0.901	9.15883e-38
Gm10036	1.33852e-35	-0.355386	0.642	0.779	3.07591e-33
Pttg1	1.57611e-34	0.568511	0.785	0.633	3.39552e-32
Snrpg	1.54098e-33	0.346043	0.992	0.995	3.12456e-31
Srsf2	1.94514e-33	0.352253	1	0.996	3.72495e-31
H2afy	2.01798e-32	0.314127	0.996	0.995	3.66105e-30
Ptma	3.79687e-31	0.294338	1	1	6.54391e-29
Rnf187	8.08137e-30	0.357801	0.987	0.974	1.3265e-27
Hspa8	1.24997e-29	0.295422	1	1	1.95848e-27
Mpc2	5.00984e-29	-0.504469	0.939	0.934	7.50822e-27
Rpl35	9.25623e-29	0.199171	1	1	1.32943e-26
Tmem176a	1.37304e-28	-0.565499	0.756	0.806	1.89315e-26
Oaz1	2.59411e-27	0.25121	1	1	3.43918e-25
Irak1bp1	8.16364e-27	0.411169	0.695	0.468	1.04223e-24
Cdk4	2.27032e-26	0.276464	0.996	0.995	2.79492e-24
Hist3h2ba	1.29227e-25	0.521066	0.846	0.55	1.53602e-23
Tmem176b	2.27545e-25	-0.463978	0.937	0.949	2.6145e-23
Hmgn2	5.13857e-25	0.348256	0.998	0.996	5.71376e-23
Tmsb10	2.04342e-24	0.381834	1	1	2.20115e-22
Arl3	4.56323e-24	0.352422	0.977	0.896	4.76651e-22
Eif3j2	8.41565e-24	-0.310285	0.524	0.718	8.53198e-22
Eif5	1.3165e-23	0.358187	0.996	0.993	1.29657e-21
Stmn1	1.28876e-22	0.298524	1	1	1.23399e-20
Eif1	1.6347e-22	0.240225	1	1	1.52292e-20
Hist1h2ap	1.87121e-22	0.714307	0.987	0.941	1.69738e-20
Marcksl1	3.52904e-22	0.294925	0.994	0.993	3.11913e-20
Usp50	5.04548e-22	0.376808	0.804	0.64	4.34794e-20
Ppia	7.00975e-22	0.214867	1	1	5.89332e-20
Malat1	1.91186e-21	-0.31794	1	1	1.56909e-19
Sec61g	2.34484e-21	0.267038	0.998	0.998	1.87969e-19
Mme	9.82325e-21	-0.591492	0.162	0.362	7.69562e-19
Ciapin1	1.47297e-20	0.382296	0.901	0.784	1.12829e-18
Cox5b	1.91696e-20	0.292596	0.996	0.995	1.43647e-18
Il11ra1	2.05615e-20	0.402337	0.655	0.422	1.50799e-18
Srsf3	6.28207e-20	0.276022	1	1	4.51131e-18
Hsp90aa1	1.13631e-19	0.267323	1	1	7.99362e-18
Nceh1	1.9839e-19	-0.431472	0.194	0.388	1.3677e-17
Mfge8	2.73418e-19	0.398125	0.941	0.782	1.84798e-17
Npnt	2.16527e-18	-0.575192	0.448	0.6	1.43533e-16
Pgk1	3.19923e-18	-0.121163	0.992	1	2.08071e-16
Hmga1	3.30242e-18	0.409298	0.724	0.585	2.10805e-16
Fabp5	5.44701e-18	0.473192	0.985	0.94	3.41379e-16
Atp1b1	5.56988e-18	-0.586814	0.526	0.669	3.42846e-16
Vcp	1.0375e-17	0.276004	0.998	0.995	6.27417e-16
Pcbp4	1.46818e-17	0.321692	0.966	0.903	8.72554e-16
Ptov1	1.91801e-17	0.252353	1	0.998	1.11968e-15
Rps27	1.94896e-17	0.184773	1	1	1.11968e-15
Glud1	2.23175e-17	-0.319357	0.825	0.865	1.26112e-15
Mbd3	3.41863e-17	0.269554	0.989	0.984	1.90065e-15
Serpinh1	8.05444e-17	0.328286	0.992	0.978	4.40693e-15
D8Ertd738e	9.22257e-17	0.263166	0.992	0.98	4.96722e-15
Atp5k	2.09508e-16	0.260654	1	0.996	1.11104e-14
Col26a1	2.51184e-16	0.405892	0.669	0.453	1.31187e-14
Wdr89	2.78958e-16	-0.209435	0.663	0.757	1.43518e-14
Igfbp7	3.05997e-16	-0.548025	0.728	0.834	1.55113e-14
Slc25a4	3.68702e-16	0.216721	1	1	1.84191e-14
Rida	4.08261e-16	-0.401989	0.644	0.735	2.01039e-14
Abhd14a	1.38498e-15	-0.241213	0.691	0.779	6.72398e-14
Dcdc2a	1.51807e-15	-0.579076	0.229	0.466	7.26775e-14
Pomp	1.57969e-15	0.248792	0.992	0.993	7.45916e-14
Bnip3	1.87229e-15	-0.296642	0.337	0.508	8.72134e-14
Ggt1	3.13119e-15	-0.628819	0.238	0.424	1.43909e-13
H2afz	3.70439e-15	0.244607	1	1	1.68013e-13
Itm2b	6.67358e-15	-0.175938	0.994	0.991	2.98751e-13
Fscn1	6.95398e-15	0.315091	0.956	0.901	3.07312e-13
Rpl27	9.55174e-15	0.237146	0.998	0.995	4.1677e-13
Etnk1	1.01329e-14	-0.289183	0.606	0.664	4.36603e-13
Gstp1	1.26824e-14	0.351301	0.745	0.598	5.39706e-13
Kif12	1.52682e-14	-0.444593	0.251	0.464	6.41824e-13
Ppa1	1.66133e-14	0.302471	0.983	0.976	6.89951e-13
Rrs1	1.98555e-14	0.313603	0.777	0.673	8.14786e-13
Sec61b	2.20377e-14	0.26893	1	1	8.84182e-13
Ucp2	2.20597e-14	0.355641	0.823	0.64	8.84182e-13
Nt5dc2	2.25649e-14	0.272205	0.996	0.985	8.94039e-13
Gnai2	2.4776e-14	0.29029	0.992	0.989	9.70486e-13
Fth1	2.52984e-14	0.240498	1	1	9.79817e-13
Prdx6	3.06216e-14	0.284246	1	0.993	1.17281e-12
Calml4	3.82007e-14	-0.838928	0.242	0.395	1.44701e-12
Ccar1	4.19247e-14	0.286106	0.971	0.947	1.57081e-12
Tomm7	4.90496e-14	0.227835	0.994	0.995	1.818e-12
Tpi1	5.46405e-14	-0.13568	0.998	0.998	2.00368e-12
Gm7324	5.71057e-14	0.421436	0.413	0.055	2.07203e-12
Srsf7	6.26906e-14	0.277619	0.994	0.993	2.25099e-12
Rab11a	6.8362e-14	-0.288813	0.863	0.867	2.42146e-12
Mrfap1	6.88434e-14	0.22263	1	0.996	2.42146e-12
Uchl1	7.11331e-14	0.428816	0.596	0.439	2.47673e-12
Fubp1	7.30328e-14	0.270812	0.996	0.991	2.51744e-12
Ybx3	1.30719e-13	0.270161	0.989	0.993	4.46126e-12
Ttc36	2.67689e-13	-0.583289	0.175	0.377	9.04632e-12
Srsf6	3.80091e-13	0.265699	0.989	0.963	1.27201e-11
Mettl1	3.96014e-13	0.305158	0.869	0.828	1.31256e-11
Eif5a	4.35698e-13	0.249236	1	1	1.43034e-11
Dnaja1	4.41061e-13	0.258322	0.998	1	1.43428e-11
Crip2	4.64332e-13	0.378201	0.846	0.718	1.49584e-11
Cbr1	5.26066e-13	-0.187939	0.846	0.879	1.67903e-11
Sms	5.87066e-13	0.280567	0.968	0.954	1.85653e-11
Ppp1r14b	5.96273e-13	0.260071	1	0.998	1.8685e-11
Aldoa	7.60263e-13	-0.163243	0.985	0.993	2.36092e-11
Anxa6	7.92682e-13	0.34814	0.629	0.439	2.43962e-11
Lgmn	8.11789e-13	-0.244644	0.583	0.66	2.47632e-11
Ddx5	9.44895e-13	0.251893	1	1	2.85706e-11
mt-Nd1	1.35496e-12	0.250503	1	0.998	4.06136e-11
Gm13305	1.43506e-12	-0.264882	0.2	0.415	4.26436e-11
Metap2	1.88079e-12	0.234946	1	0.996	5.53707e-11
Sfpq	1.89549e-12	0.31838	0.996	0.993	5.53707e-11
1700011H14Rik	2.2005e-12	-0.473789	0.196	0.406	6.37405e-11
Trim28	2.35917e-12	0.246763	0.996	0.985	6.77672e-11
Snrpf	2.64606e-12	0.217688	0.998	0.998	7.53799e-11
Mat2a	3.26483e-12	0.337974	0.971	0.941	9.22448e-11
Ssbp4	3.36542e-12	0.281665	0.933	0.896	9.43137e-11
Ldha	3.94726e-12	-0.103208	0.996	0.998	1.09728e-10
Fkbp4	4.28243e-12	0.255007	0.994	0.995	1.18092e-10
Brd3	5.2725e-12	0.274236	0.962	0.929	1.44241e-10
Aldh1a2	5.54453e-12	-0.216891	0.869	0.907	1.50488e-10
Ide	5.65649e-12	-0.169021	0.693	0.803	1.52328e-10
G3bp1	5.98186e-12	0.230591	0.996	0.995	1.59841e-10
Hnrnpab	6.17477e-12	0.259303	0.998	0.998	1.63727e-10
Neu1	6.47198e-12	-0.286372	0.333	0.419	1.70297e-10
Phb	6.69921e-12	0.26562	0.943	0.892	1.74941e-10
Ctsl	7.91442e-12	-0.148114	0.979	0.984	2.03685e-10
Nnat	7.91955e-12	0.390929	0.819	0.673	2.03685e-10
Arf5	7.97723e-12	0.258625	0.998	0.982	2.03685e-10
Itga1	9.17208e-12	-0.34753	0.307	0.431	2.32472e-10
Retreg1	9.58603e-12	-0.299537	0.356	0.483	2.4119e-10
Ezr	9.7663e-12	-0.216438	0.912	0.952	2.43945e-10
Tril	9.94511e-12	0.457306	0.648	0.525	2.46398e-10
Fkbp1a	1.00075e-11	0.244535	0.985	0.982	2.46398e-10
Cpn1	1.06437e-11	-0.487395	0.259	0.424	2.60205e-10
Hmgn1	1.0802e-11	0.221929	1	1	2.62216e-10
Sf3b4	1.22349e-11	0.276664	0.888	0.834	2.94921e-10
Rbm47	1.24032e-11	-0.381232	0.187	0.36	2.96901e-10
Ctnnbip1	1.2558e-11	0.272172	0.905	0.81	2.98535e-10
Sostdc1	1.36114e-11	-0.738868	0.135	0.278	3.21359e-10
Lrrc59	1.60837e-11	0.291834	0.935	0.878	3.77147e-10
Atic	1.73292e-11	0.28522	0.851	0.777	4.03606e-10
Snhg18	2.1702e-11	-0.215541	0.646	0.713	5.01763e-10
Ptbp1	2.18348e-11	0.254962	0.96	0.938	5.01763e-10
Rpl36	2.51444e-11	0.16269	1	1	5.73993e-10
mt-Nd4	2.6676e-11	0.235193	1	0.998	6.02457e-10
Nudc	2.68718e-11	0.231775	0.996	0.996	6.02457e-10
Rpl39	2.69157e-11	0.164612	1	1	6.02457e-10
Exoc6	2.77839e-11	-0.269931	0.242	0.395	6.17879e-10
H2afy2	2.82792e-11	0.281251	0.975	0.927	6.24862e-10
Vdac3	2.99718e-11	0.232851	0.979	0.984	6.58042e-10
Gpc4	3.13454e-11	-0.353077	0.234	0.395	6.83846e-10
Tecr	3.36857e-11	0.224825	0.996	0.993	7.30281e-10
Dcakd	3.42789e-11	0.261874	0.937	0.894	7.38496e-10
Sdc4	3.64124e-11	-0.183162	0.863	0.92	7.79588e-10
Psat1	3.7873e-11	0.28162	0.684	0.486	8.05853e-10
Hist1h2ab	4.38112e-11	0.372874	0.598	0.49	9.26486e-10
Fkrp	4.50201e-11	-0.169544	0.484	0.64	9.46246e-10
H3f3a	5.03631e-11	0.181443	1	1	1.05213e-09
Dapk1	5.11736e-11	-0.22299	0.362	0.481	1.06262e-09
Tra2b	5.35242e-11	0.247622	0.985	0.987	1.10478e-09
Cfl1	5.40522e-11	0.219856	0.998	0.998	1.10903e-09
Larp7	6.4795e-11	0.264453	0.945	0.888	1.31739e-09
Ran	6.49713e-11	0.21663	1	1	1.31739e-09
Mrpl33	6.56877e-11	-0.12329	0.882	0.909	1.32413e-09
Ubqln2	7.26974e-11	0.277831	0.781	0.623	1.45691e-09
Hmgb3	7.42013e-11	0.281094	0.998	0.995	1.47845e-09
Camk2n1	8.02206e-11	-0.202517	0.735	0.793	1.5892e-09
Lyar	8.48099e-11	0.251216	0.979	0.96	1.67051e-09
Wdr6	1.10695e-10	0.276701	0.768	0.633	2.16799e-09
Ndufa5	1.1885e-10	0.239312	0.987	0.976	2.31456e-09
Grhpr	1.33142e-10	-0.174171	0.709	0.757	2.57831e-09
Sumo2	1.5285e-10	0.191774	1	0.996	2.94343e-09
AY036118	1.54092e-10	-0.360964	0.935	0.952	2.95086e-09
Zfp428	1.58674e-10	0.264376	0.863	0.761	3.02181e-09
Wdfy1	1.69071e-10	0.274031	0.501	0.309	3.20214e-09
Ctdspl	1.887e-10	0.291181	0.931	0.856	3.55437e-09
Stip1	2.03482e-10	0.253465	0.973	0.925	3.81197e-09
Crabp2	2.18881e-10	0.355971	0.448	0.276	4.07828e-09
Raly	2.2087e-10	0.224876	0.992	0.984	4.09322e-09
Sephs2	2.224e-10	-0.200203	0.596	0.687	4.09954e-09
Reep3	2.45064e-10	0.282808	0.836	0.755	4.49328e-09
Acot13	2.55604e-10	-0.183025	0.646	0.729	4.66174e-09
Glrx5	2.61637e-10	0.24444	0.971	0.96	4.74665e-09
Igfbp2	2.69076e-10	0.40814	0.84	0.673	4.85605e-09
Fdps	3.17671e-10	0.364929	0.897	0.808	5.6883e-09
Tpmt	3.18492e-10	-0.243254	0.474	0.541	5.6883e-09
Hes6	3.30216e-10	0.273805	0.741	0.585	5.8673e-09
Acot7	3.3698e-10	0.268105	0.648	0.459	5.95677e-09
Rpl37	3.51754e-10	0.156872	1	1	6.1862e-09
Pou3f3	4.19393e-10	-0.422172	0.217	0.378	7.33831e-09
Uqcrq	4.28403e-10	0.248926	0.994	0.995	7.45811e-09
Ddb1	4.6099e-10	0.254337	0.945	0.912	7.98508e-09
Pdia6	4.94808e-10	0.27167	0.996	0.993	8.52801e-09
Scd2	5.18158e-10	0.291448	0.924	0.845	8.88603e-09
Taf1d	5.59647e-10	0.251432	0.983	0.96	9.55001e-09
Slc1a5	5.65877e-10	0.369597	0.375	0.086	9.60875e-09
Rpl41	5.92096e-10	0.148404	1	1	1.00047e-08
mt-Nd6	6.18914e-10	-0.199625	0.676	0.751	1.03704e-08
Cd63	6.19755e-10	-0.12376	0.989	0.987	1.03704e-08
Zfand5	6.39185e-10	0.258401	0.939	0.857	1.06438e-08
Tmem258	6.47882e-10	0.220888	0.987	0.985	1.07368e-08
Kdelr2	6.60636e-10	0.259934	0.931	0.899	1.08958e-08
Adamts1	7.66485e-10	-0.331342	0.438	0.521	1.25813e-08
Gclm	7.9126e-10	-0.219112	0.636	0.667	1.29264e-08
Rpl38	8.65355e-10	0.150545	1	1	1.40702e-08
Ptpn1	9.53148e-10	0.259644	0.811	0.682	1.54249e-08
Rbm3	9.74552e-10	0.202126	0.998	1	1.56976e-08
Bicc1	1.00015e-09	-0.197851	0.611	0.651	1.6035e-08
Wdr83os	1.04152e-09	0.245113	0.943	0.896	1.6602e-08
Lsm6	1.04579e-09	0.228169	0.992	0.974	1.6602e-08
Trim35	1.04997e-09	0.272774	0.869	0.781	1.6602e-08
Timm17a	1.05606e-09	0.24697	0.933	0.894	1.6622e-08
Srrt	1.07909e-09	0.273369	0.937	0.87	1.69074e-08
Adrm1	1.16093e-09	0.251566	0.92	0.865	1.81074e-08
Myo6	1.21704e-09	-0.188165	0.735	0.804	1.8897e-08
Rrm1	1.23245e-09	0.256714	0.939	0.87	1.90505e-08
Ccdc85b	1.30081e-09	0.249543	0.68	0.561	2.00174e-08
Phf5a	1.31798e-09	0.228104	0.983	0.978	2.01915e-08
Ivns1abp	1.33308e-09	-0.152705	0.897	0.91	2.03324e-08
Uqcr11	1.34e-09	0.213983	0.998	0.996	2.03479e-08
Gng12	1.49757e-09	-0.169357	0.705	0.777	2.26409e-08
Acadm	1.583e-09	-0.19665	0.636	0.709	2.38279e-08
Dbn1	1.65041e-09	0.29648	0.869	0.775	2.47346e-08
Polr2l	1.71067e-09	0.273762	0.691	0.565	2.55268e-08
Txndc5	1.74918e-09	0.25813	0.897	0.826	2.59888e-08
Cycs	1.82202e-09	0.276155	0.985	0.952	2.6955e-08
mt-Cytb	2.03368e-09	0.222327	1	1	2.99516e-08
Ncbp2	2.04196e-09	0.24751	0.924	0.883	2.99516e-08
Rbm42	2.17711e-09	0.251828	0.846	0.793	3.17988e-08
Hspd1	2.37795e-09	0.23357	0.998	0.996	3.45856e-08
Spock2	2.44317e-09	0.408038	0.678	0.539	3.53849e-08
Hist1h2bj	2.59141e-09	0.275542	0.539	0.353	3.73748e-08
Fasn	2.61668e-09	0.254863	0.672	0.552	3.7582e-08
Pcbd1	2.67049e-09	-0.207823	0.72	0.755	3.81958e-08
Luc7l3	2.7193e-09	0.237463	0.994	0.978	3.87287e-08
Sri	2.73022e-09	-0.111596	0.893	0.901	3.87287e-08
P4ha1	2.75724e-09	-0.16575	0.545	0.631	3.89517e-08
Ddah1	3.04326e-09	-0.251648	0.703	0.739	4.28168e-08
Cadm1	3.06416e-09	0.270346	0.802	0.664	4.29356e-08
Prmt1	3.62728e-09	0.203267	0.998	0.998	5.06204e-08
Trappc6a	4.40107e-09	-0.120755	0.827	0.854	6.11713e-08
Prr5l	4.44747e-09	0.291459	0.655	0.49	6.1568e-08
Cys1	4.71661e-09	-0.250175	0.229	0.369	6.48405e-08
Clns1a	4.72148e-09	0.232359	0.947	0.916	6.48405e-08
Plscr2	4.92335e-09	-0.327218	0.185	0.305	6.73443e-08
Hnrnpdl	5.07135e-09	0.237322	0.985	0.978	6.90479e-08
Lsm12	5.08795e-09	0.230166	0.949	0.94	6.90479e-08
Bdh2	5.38093e-09	-0.289728	0.253	0.322	7.27375e-08
Slc9a5	5.5355e-09	0.388158	0.366	0.037	7.45347e-08
Banf1	5.86226e-09	0.230519	0.996	0.989	7.81126e-08
Hist1h4i	5.86432e-09	0.276179	0.686	0.523	7.81126e-08
Prdx1	5.86921e-09	0.211095	0.998	0.998	7.81126e-08
Wwc2	7.00083e-09	-0.141433	0.752	0.823	9.28148e-08
H1fx	7.35967e-09	0.304136	0.998	0.971	9.71984e-08
Nasp	7.43349e-09	0.280026	0.994	0.995	9.77986e-08
Atp6v1a	8.16533e-09	-0.161256	0.688	0.704	1.07019e-07
Lmnb1	8.46396e-09	0.255481	0.996	0.984	1.10512e-07
Ssb	8.71124e-09	0.207265	0.998	1	1.13312e-07
Lgr4	8.96602e-09	-0.23267	0.423	0.569	1.16188e-07
Nfyb	9.96878e-09	0.245919	0.882	0.814	1.28698e-07
Ube2n	1.06266e-08	0.220375	0.985	0.973	1.36679e-07
Ddt	1.16335e-08	-0.15721	0.777	0.801	1.49074e-07
Ahsa1	1.17336e-08	0.224221	0.952	0.912	1.49799e-07
Psmd7	1.2109e-08	0.214096	0.989	0.996	1.54021e-07
Psph	1.25636e-08	-0.200796	0.474	0.59	1.59216e-07
Gnas	1.41208e-08	0.198148	1	1	1.78294e-07
Gm10093	1.50076e-08	-0.187169	0.219	0.369	1.888e-07
Gdi2	1.51289e-08	0.211147	0.989	0.976	1.89634e-07
Nme1	1.54086e-08	0.252825	1	1	1.92441e-07
Vcan	1.56808e-08	0.302492	0.945	0.828	1.95133e-07
Atp5j2	1.58341e-08	0.194654	1	0.998	1.96331e-07
Ddx39b	1.70812e-08	0.192086	0.998	0.993	2.11035e-07
2022-09-04	1.8505e-08	-0.27738	0.349	0.448	2.2781e-07
Gadd45gip1	1.85938e-08	0.244975	0.907	0.824	2.28088e-07
Fkbp10	1.89586e-08	0.249967	0.627	0.497	2.31739e-07
Cacybp	2.10935e-08	0.230526	0.994	0.965	2.56924e-07
Cdh16	2.2626e-08	-0.312767	0.272	0.389	2.74619e-07
Canx	2.33291e-08	0.255656	0.975	0.965	2.8216e-07
Anxa2	2.37903e-08	-0.307695	0.613	0.64	2.86732e-07
Rbm4b	2.45562e-08	0.231996	0.792	0.605	2.94021e-07
Rnf6	2.45657e-08	-0.165427	0.749	0.731	2.94021e-07
Tcp1	2.51035e-08	0.196465	0.998	0.998	2.99418e-07
Junb	2.54327e-08	-0.298549	0.651	0.697	3.02298e-07
Rex1bd	2.61248e-08	0.242716	0.935	0.901	3.09457e-07
Prdx2	2.66126e-08	0.187993	1	1	3.14156e-07
Eif4h	2.73512e-08	0.227224	0.985	0.974	3.21773e-07
Ywhaq	2.81111e-08	0.212584	1	0.998	3.29588e-07
Parp1	2.86729e-08	0.257101	0.954	0.929	3.35035e-07
1110008F13Rik	2.88978e-08	0.233527	0.966	0.956	3.3578e-07
Cnot6	2.89315e-08	0.244839	0.907	0.832	3.3578e-07
Vcam1	2.97788e-08	-0.462309	0.166	0.245	3.44454e-07
Bok	3.09199e-08	0.271541	0.714	0.558	3.56458e-07
Ccdc25	3.33371e-08	0.263539	0.806	0.662	3.83043e-07
Gja1	3.42817e-08	0.321967	0.781	0.728	3.92588e-07
Mns1	3.46056e-08	0.256478	0.709	0.583	3.94985e-07
Manf	3.57058e-08	0.29154	0.973	0.967	4.06198e-07
Arhgap24	3.77167e-08	-0.242039	0.288	0.43	4.27662e-07
Cryz	4.11493e-08	-0.176136	0.545	0.636	4.65055e-07
Csnk1e	5.12954e-08	0.238639	0.937	0.878	5.77828e-07
Dhx15	5.36962e-08	0.226391	0.958	0.925	6.02902e-07
Mapre1	5.7992e-08	0.230161	0.962	0.945	6.49021e-07
Ndufa12	5.85926e-08	0.202685	0.998	0.991	6.53621e-07
Skp2	6.01723e-08	0.244621	0.741	0.629	6.68406e-07
Pdap1	6.03058e-08	0.207065	0.996	1	6.68406e-07
Arpc5l	6.25149e-08	0.237384	0.931	0.854	6.90669e-07
Baz1a	6.58652e-08	0.26033	0.762	0.654	7.25359e-07
Arl2bp	6.6206e-08	0.240951	0.855	0.761	7.2679e-07
Cnbp	7.0982e-08	0.198844	1	0.995	7.76746e-07
Psma7	7.14045e-08	0.202007	0.998	0.996	7.78897e-07
Epcam	7.23479e-08	-0.325638	0.596	0.623	7.86698e-07
Zfp326	7.97369e-08	0.248452	0.918	0.859	8.64318e-07
Igfbp5	8.06749e-08	0.565458	0.659	0.596	8.71744e-07
Ranbp1	8.33948e-08	0.233026	0.998	1	8.98318e-07
Dpp4	8.8956e-08	-0.32554	0.272	0.45	9.55237e-07
Ttc28	9.04098e-08	0.388319	0.712	0.607	9.67835e-07
Kpnb1	9.14707e-08	0.232161	0.958	0.898	9.76159e-07
Nap1l4	9.19004e-08	0.223458	0.962	0.945	9.77718e-07
Siva1	9.35367e-08	0.248151	0.992	0.993	9.92065e-07
Lsm3	9.54955e-08	0.20959	0.977	0.971	1.00973e-06
Oxct1	9.72413e-08	0.229394	0.973	0.927	1.02505e-06
Fgfr1	9.85786e-08	0.302844	0.924	0.863	1.03598e-06
Hoxd8	1.00496e-07	-0.199996	0.345	0.422	1.05292e-06
Neat1	1.01906e-07	-0.281581	0.259	0.351	1.06446e-06
Zbtb8os	1.06586e-07	-0.120906	0.68	0.74	1.10998e-06
Pa2g4	1.09405e-07	0.226939	0.989	0.985	1.1359e-06
Maged1	1.13489e-07	0.231521	0.977	0.973	1.17476e-06
Picalm	1.16337e-07	-0.148546	0.659	0.66	1.19797e-06
Arhgdia	1.16622e-07	0.239124	0.96	0.938	1.19797e-06
Tomm40	1.16773e-07	0.22477	0.992	0.963	1.19797e-06
Fam107b	1.21606e-07	-0.211922	0.316	0.375	1.24384e-06
Pax2	1.28733e-07	0.320408	0.943	0.888	1.31049e-06
Ift46	1.28926e-07	-0.120526	0.564	0.653	1.31049e-06
Atp1a1	1.29315e-07	-0.110955	0.918	0.927	1.31049e-06
Cpsf2	1.29643e-07	0.237634	0.815	0.704	1.31049e-06
Tmed2	1.30407e-07	0.213994	0.989	0.978	1.31436e-06
Uchl3	1.3615e-07	0.226529	0.949	0.92	1.36825e-06
Ncam1	1.37034e-07	0.250207	0.977	0.962	1.37313e-06
Lima1	1.38567e-07	-0.153961	0.537	0.607	1.38447e-06
Gcn1l1	1.40672e-07	0.233485	0.773	0.645	1.40143e-06
Ppp1ca	1.41834e-07	0.192719	0.996	1	1.40894e-06
Pccb	1.43506e-07	-0.153637	0.387	0.47	1.42145e-06
Pfkp	1.44952e-07	-0.261572	0.175	0.305	1.43166e-06
Strap	1.48675e-07	0.211311	0.971	0.967	1.46424e-06
Ankrd10	1.49632e-07	0.230712	0.84	0.792	1.46946e-06
Hnrnpc	1.50559e-07	0.193719	0.996	0.996	1.47436e-06
Hoxa5	1.58842e-07	0.248742	0.541	0.402	1.55108e-06
Psmd8	1.63203e-07	0.203874	0.983	0.96	1.58915e-06
Psip1	1.69707e-07	0.225844	0.994	0.989	1.64783e-06
Set	1.70874e-07	0.206918	1	1	1.65e-06
Son	1.70888e-07	0.21223	0.996	0.995	1.65e-06
Idi1	1.73418e-07	0.294971	0.726	0.59	1.66975e-06
Osr1	1.87053e-07	0.383824	0.368	0.263	1.79602e-06
Atp5e	1.99748e-07	0.182005	1	0.998	1.91258e-06
Ywhab	2.02861e-07	0.203123	0.992	0.978	1.93245e-06
Alyref	2.02944e-07	0.219381	0.987	0.967	1.93245e-06
Rbm25	2.03842e-07	0.206504	0.989	0.995	1.93566e-06
Tmem234	2.09418e-07	0.221385	0.96	0.951	1.98314e-06
Ubb	2.11822e-07	0.206724	1	1	2.00041e-06
Hsph1	2.13273e-07	0.262212	0.758	0.574	2.00861e-06
Cyba	2.15092e-07	-0.168889	0.863	0.861	2.02022e-06
Cnn3	2.15693e-07	0.251149	0.964	0.899	2.02036e-06
Slc38a1	2.23936e-07	0.245361	0.874	0.835	2.09189e-06
Tyms	2.32694e-07	0.259064	0.949	0.91	2.16783e-06
Acadl	2.42193e-07	-0.115565	0.842	0.848	2.25024e-06
Serpinf1	2.5533e-07	0.264289	0.648	0.475	2.36592e-06
Pin1	2.66893e-07	0.208719	0.971	0.949	2.46643e-06
Tma7	2.71187e-07	0.206827	0.998	1	2.49942e-06
Dek	2.73415e-07	0.224147	0.996	1	2.51323e-06
Ddx6	2.7529e-07	0.228278	0.909	0.83	2.52373e-06
Sar1a	2.79002e-07	0.22426	0.882	0.841	2.55098e-06
Fosb	2.93976e-07	-0.259139	0.491	0.581	2.68078e-06
Nxf1	2.95608e-07	0.21597	0.977	0.962	2.68593e-06
Vamp8	2.96099e-07	-0.133487	0.747	0.782	2.68593e-06
S100a10	3.19723e-07	-0.170834	0.806	0.843	2.89261e-06
Fads1	3.26046e-07	0.218175	0.596	0.453	2.94209e-06
Ifitm2	3.52001e-07	0.253411	0.981	0.965	3.16801e-06
Pth1r	3.62586e-07	-0.192911	0.411	0.525	3.25477e-06
Sf1	3.66865e-07	0.229467	0.878	0.797	3.28463e-06
Slc35a1	3.68604e-07	-0.123324	0.589	0.671	3.29165e-06
Chd4	3.72909e-07	0.252978	0.996	0.976	3.32149e-06
Hnrnpa3	3.89735e-07	0.249528	1	0.998	3.46241e-06
Ube2m	3.93604e-07	0.2122	0.992	0.982	3.48561e-06
Ssr2	3.94369e-07	0.199186	0.989	0.987	3.48561e-06
Mrpl19	4.05609e-07	0.234617	0.832	0.793	3.57579e-06
Bag2	4.29753e-07	-0.143501	0.722	0.742	3.77898e-06
Akirin1	4.50978e-07	0.226022	0.68	0.539	3.95553e-06
Ssrp1	4.67614e-07	0.197472	0.989	0.984	4.09103e-06
Top1	4.85689e-07	0.189559	1	1	4.23841e-06
Jam3	4.94676e-07	0.23522	0.691	0.548	4.30593e-06
Pcbp1	5.08517e-07	0.195794	0.994	0.995	4.41526e-06
Acat2	5.16887e-07	0.226744	0.785	0.702	4.47666e-06
Snhg12	5.36251e-07	0.249621	0.754	0.669	4.63272e-06
Pabpn1	5.51168e-07	0.227515	0.931	0.867	4.74969e-06
Slc16a3	5.67847e-07	-0.187039	0.451	0.503	4.88122e-06
Wdr82	5.80393e-07	0.217995	0.718	0.592	4.97666e-06
Cyth2	5.84025e-07	0.223603	0.867	0.815	4.99537e-06
Cthrc1	5.92227e-07	-0.296398	0.274	0.41	5.05299e-06
Rangap1	6.09345e-07	0.258133	0.886	0.793	5.1862e-06
Sae1	6.14063e-07	0.209033	0.971	0.962	5.21349e-06
Cpb2	6.24072e-07	-0.350689	0.177	0.325	5.28545e-06
Nme2	6.47247e-07	0.21795	0.459	0.324	5.46828e-06
Aurkaip1	6.54138e-07	0.198652	0.968	0.958	5.51299e-06
Tex30	6.68051e-07	0.224709	0.76	0.669	5.61652e-06
Cs	6.75038e-07	0.221123	0.825	0.724	5.66145e-06
Phlda3	6.87442e-07	-0.148668	0.665	0.669	5.75149e-06
Fxyd2	6.91682e-07	-0.451652	0.396	0.585	5.77295e-06
Agpat3	7.6412e-07	-0.133711	0.678	0.724	6.36213e-06
Pgm2	7.77338e-07	-0.149592	0.337	0.442	6.45658e-06
2610318N02Rik	7.90514e-07	0.212267	0.672	0.481	6.55024e-06
Vkorc1	7.9538e-07	-0.117887	0.547	0.638	6.56683e-06
Fam32a	7.96326e-07	0.225107	0.876	0.812	6.56683e-06
Coq7	8.5575e-07	0.211798	0.937	0.929	7.04002e-06
Cdc26	8.6037e-07	0.207644	0.949	0.903	7.06118e-06
Cse1l	8.88177e-07	0.231309	0.794	0.726	7.27208e-06
Selenow	8.94903e-07	0.196324	0.996	0.998	7.30978e-06
Dbnl	9.22504e-07	0.21712	0.853	0.824	7.51743e-06
Abhd16a	9.25374e-07	0.253251	0.741	0.676	7.52303e-06
Nisch	9.79858e-07	0.218266	0.973	0.945	7.94722e-06
Cdkn1a	9.83853e-07	-0.251721	0.2	0.342	7.96089e-06
Tlcd1	1.0627e-06	-0.17416	0.251	0.36	8.57875e-06
Kpna2	1.09247e-06	0.321725	0.606	0.455	8.79848e-06
Selenbp1	1.13228e-06	-0.21031	0.404	0.431	9.09783e-06
Zfp266	1.16629e-06	0.228489	0.859	0.801	9.33853e-06
Eef2kmt	1.16765e-06	-0.117122	0.535	0.616	9.33853e-06
Eif4e	1.18363e-06	0.214377	0.939	0.898	9.44436e-06
Clmp	1.19595e-06	0.351963	0.568	0.492	9.52062e-06
Arhgap18	1.22067e-06	-0.1571	0.453	0.528	9.69505e-06
Kctd5	1.23314e-06	0.20986	0.653	0.512	9.77159e-06
Eif4ebp1	1.23779e-06	0.221823	0.912	0.841	9.78595e-06
AC160336.1	1.26502e-06	0.273696	0.958	0.927	9.95573e-06
Hist1h2ae	1.26504e-06	0.380107	0.888	0.821	9.95573e-06
Cpxm1	1.29369e-06	0.26675	0.693	0.587	1.01504e-05
Ppp2r5a	1.29567e-06	-0.129185	0.528	0.589	1.01504e-05
Tmem167	1.31918e-06	0.205816	0.987	0.973	1.03001e-05
Sf3b5	1.32075e-06	0.198359	0.985	0.982	1.03001e-05
Ube2l3	1.333e-06	0.195804	0.994	0.982	1.03721e-05
Sem1	1.36727e-06	0.175534	1	0.998	1.06148e-05
Slc25a19	1.37506e-06	0.222934	0.581	0.444	1.06513e-05
Rpa2	1.38313e-06	0.232981	0.853	0.775	1.06898e-05
Sfr1	1.39027e-06	0.200103	0.994	0.984	1.07209e-05
Cebpz	1.40028e-06	0.225716	0.928	0.894	1.0774e-05
Smn1	1.43232e-06	0.226995	0.869	0.835	1.0996e-05
Col1a2	1.44168e-06	0.511378	0.638	0.395	1.10433e-05
Zwint	1.51986e-06	0.214004	0.909	0.834	1.16163e-05
Crb3	1.52815e-06	-0.197698	0.267	0.406	1.16538e-05
Sf3b2	1.54794e-06	0.198415	0.987	0.993	1.17787e-05
Cct8	1.57318e-06	0.188565	0.998	0.998	1.19444e-05
Snhg9	1.60887e-06	-0.119528	0.413	0.505	1.21885e-05
Rdm1	1.70514e-06	-0.118013	0.509	0.578	1.28895e-05
Rbm39	1.71994e-06	0.169713	0.996	0.998	1.29729e-05
H19	1.73414e-06	0.391014	0.947	0.793	1.30515e-05
Cdh2	1.75905e-06	0.255871	0.697	0.536	1.32101e-05
Clic4	1.76521e-06	-0.117342	0.796	0.819	1.32166e-05
Ddx1	1.76758e-06	0.20674	0.985	0.971	1.32166e-05
Cenpn	1.77544e-06	0.206747	0.634	0.521	1.32466e-05
Cryzl2	1.81602e-06	-0.147674	0.291	0.395	1.35202e-05
Dut	1.82144e-06	0.231846	0.983	0.978	1.35312e-05
Lmo4	1.83306e-06	-0.144698	0.726	0.771	1.35883e-05
Snrpa1	1.89431e-06	0.219184	0.985	0.963	1.40122e-05
Nono	1.94436e-06	0.187436	0.994	0.995	1.43516e-05
Mmp14	1.958e-06	0.230247	0.802	0.675	1.44214e-05
Grb10	1.97318e-06	0.224088	0.977	0.956	1.45023e-05
Sema3c	2.04944e-06	-0.23068	0.276	0.391	1.50307e-05
Rab3ip	2.09189e-06	-0.166629	0.764	0.799	1.53094e-05
Tuba1a	2.1076e-06	0.296969	0.975	0.938	1.53917e-05
Itga6	2.17432e-06	-0.211755	0.604	0.682	1.58454e-05
Arhgap29	2.19552e-06	-0.213886	0.293	0.4	1.59662e-05
Hnrnpm	2.38505e-06	0.206375	0.996	1	1.72932e-05
Mrpl4	2.38803e-06	0.208346	0.832	0.771	1.72932e-05
Luc7l	2.40765e-06	0.218982	0.888	0.804	1.73987e-05
Slc39a7	2.41635e-06	0.22682	0.836	0.808	1.7425e-05
Igfbp4	2.52766e-06	0.310127	0.933	0.852	1.81897e-05
Psmd2	2.56362e-06	0.198875	0.977	0.963	1.841e-05
Smc3	2.57828e-06	0.204604	0.981	0.993	1.84768e-05
Wdr45b	2.64314e-06	0.207579	0.855	0.748	1.88839e-05
Nhp2	2.65084e-06	0.208256	0.979	0.962	1.88839e-05
Smad7	2.65322e-06	-0.103175	0.722	0.759	1.88839e-05
Slc39a8	2.657e-06	-0.25744	0.213	0.272	1.88839e-05
Mthfd2	2.66518e-06	0.240074	0.674	0.479	1.8903e-05
Capn6	2.69486e-06	0.336853	0.718	0.596	1.90743e-05
Zranb2	2.71116e-06	0.206042	0.979	0.976	1.91503e-05
Syne2	2.78027e-06	-0.138622	0.743	0.753	1.95983e-05
Smarce1	2.83016e-06	0.203302	0.985	0.982	1.99093e-05
Tpbg	2.84295e-06	0.212991	0.594	0.473	1.99585e-05
Arpc2	2.85856e-06	0.212263	0.987	0.989	2.00273e-05
Ssbp3	2.86814e-06	0.236257	0.905	0.817	2.00537e-05
Ndufa1	2.88334e-06	0.207991	0.937	0.907	2.01192e-05
Ywhae	2.89391e-06	0.183867	1	1	2.01521e-05
Fen1	2.92473e-06	0.225709	0.842	0.729	2.03257e-05
Rbp1	2.94302e-06	0.340094	0.983	0.892	2.04117e-05
Hdac1	2.96441e-06	0.207281	0.928	0.872	2.04852e-05
Ppm1g	2.96552e-06	0.217237	0.941	0.916	2.04852e-05
Myo5b	2.97302e-06	-0.16632	0.406	0.532	2.0496e-05
Aimp2	3.08545e-06	0.212077	0.846	0.77	2.12287e-05
Pla2g16	3.10905e-06	-0.168449	0.312	0.408	2.13484e-05
Rpl37a	3.16531e-06	0.135236	1	1	2.16915e-05
Sel1l3	3.26809e-06	0.239	0.469	0.289	2.23514e-05
Naa15	3.34533e-06	0.233947	0.926	0.909	2.28344e-05
Isyna1	3.43318e-06	0.2412	0.909	0.885	2.33877e-05
Mex3a	3.47484e-06	0.240192	0.907	0.824	2.36248e-05
Lactb2	3.50375e-06	-0.204405	0.183	0.316	2.37744e-05
Hnrnpu	3.54033e-06	0.245662	1	0.998	2.39357e-05
Cad	3.54141e-06	0.218817	0.623	0.548	2.39357e-05
Cebpb	3.5689e-06	-0.144623	0.366	0.472	2.40744e-05
Dnajc3	3.58236e-06	0.218774	0.865	0.746	2.41179e-05
Plp2	3.68472e-06	-0.102532	0.707	0.768	2.47587e-05
Actl6a	3.70698e-06	0.207228	0.973	0.936	2.48348e-05
Mrpl20	3.71044e-06	0.210295	0.966	0.949	2.48348e-05
Rbbp7	3.72047e-06	0.207012	0.979	0.965	2.48536e-05
Meaf6	3.83175e-06	0.213918	0.779	0.715	2.55475e-05
Psma6	3.93162e-06	0.189681	0.985	0.978	2.61627e-05
Mrpl52	3.98354e-06	0.18486	0.992	0.989	2.64571e-05
Chtf8	4.19224e-06	0.213781	0.827	0.771	2.77427e-05
Cntfr	4.1932e-06	0.239243	0.581	0.415	2.77427e-05
Anapc5	4.21966e-06	0.189189	0.989	0.985	2.78643e-05
Thoc6	4.24861e-06	0.204431	0.766	0.644	2.80018e-05
Rnps1	4.29693e-06	0.200342	0.962	0.94	2.82663e-05
Pdk1	4.35219e-06	-0.12929	0.421	0.499	2.85752e-05
4933404O12Rik	4.40913e-06	0.298657	0.335	0.079	2.8894e-05
Atp5a1	4.43234e-06	0.154226	1	0.998	2.8991e-05
Adgrl1	4.44942e-06	0.214569	0.684	0.57	2.90477e-05
Magoh	4.48324e-06	0.199808	0.996	0.984	2.92131e-05
Sec13	4.53233e-06	0.219009	0.865	0.815	2.94772e-05
Ctbp1	4.59111e-06	0.194626	0.971	0.921	2.98033e-05
Emid1	4.65393e-06	0.366267	0.762	0.729	3.01543e-05
Fhod3	4.67216e-06	-0.163151	0.234	0.355	3.02156e-05
Cmtm8	4.73465e-06	-0.154647	0.461	0.525	3.05624e-05
Zfp207	4.7881e-06	0.204372	0.945	0.927	3.08497e-05
Cdkn1b	4.82234e-06	-0.120398	0.581	0.633	3.10124e-05
Ube2f	4.85681e-06	0.208556	0.684	0.563	3.11758e-05
Cyb5r3	5.05808e-06	0.219459	0.907	0.867	3.24074e-05
Tmem97	5.09388e-06	0.214495	0.781	0.629	3.25762e-05
Trp53rka	5.11254e-06	0.196215	0.509	0.369	3.2635e-05
Sec61a1	5.50371e-06	0.222037	0.758	0.693	3.50671e-05
Tpm1	5.63072e-06	-0.11496	0.926	0.941	3.58101e-05
G3bp2	5.64168e-06	0.201527	0.956	0.96	3.58138e-05
Smarca5	5.90478e-06	0.219428	1	0.984	3.7415e-05
Anp32b	5.96638e-06	0.175349	1	1	3.7736e-05
Hspa5	6.12101e-06	0.247311	0.998	0.991	3.86431e-05
Apoe	6.15696e-06	0.314136	0.604	0.512	3.8799e-05
Akr1a1	6.2268e-06	0.176849	0.992	0.985	3.91675e-05
Zfp664	6.29907e-06	0.211524	0.918	0.859	3.95499e-05
Hdgfl2	6.52341e-06	0.204792	0.882	0.806	4.0884e-05
Trappc12	6.58272e-06	0.193746	0.505	0.333	4.11808e-05
Ddx52	6.67891e-06	0.214642	0.817	0.751	4.17069e-05
Kif13b	6.78954e-06	-0.125433	0.333	0.411	4.23211e-05
Tuba4a	6.90332e-06	-0.221389	0.192	0.327	4.29526e-05
Rora	6.92668e-06	-0.175445	0.234	0.338	4.30203e-05
Nudcd3	7.01221e-06	0.202266	0.895	0.814	4.34732e-05
Tkt	7.05538e-06	0.183782	0.987	0.978	4.36239e-05
Marcks	7.06183e-06	0.230537	0.992	0.967	4.36239e-05
Lsm8	7.16629e-06	0.189846	0.952	0.932	4.419e-05
Uqcrc1	7.19389e-06	0.193917	0.983	0.949	4.4281e-05
Wars	7.23484e-06	0.195598	0.598	0.442	4.44536e-05
Ewsr1	7.37789e-06	0.202921	0.994	0.982	4.52519e-05
Pnmal2	7.4638e-06	-0.14614	0.223	0.346	4.56975e-05
Fkbp3	7.69932e-06	0.178467	0.994	0.993	4.70559e-05
H2-D1	7.79013e-06	-0.186831	0.309	0.397	4.75267e-05
Clcn3	8.21523e-06	-0.120985	0.52	0.592	5.00316e-05
Anxa4	8.55774e-06	-0.156257	0.229	0.342	5.20256e-05
Eloc	9.01172e-06	0.192095	0.979	0.971	5.46891e-05
Pinx1	9.08133e-06	0.21872	0.638	0.519	5.50146e-05
Cox6c	9.16946e-06	0.189654	1	1	5.54511e-05
Sipa1l1	9.20817e-06	0.226872	0.768	0.671	5.55877e-05
Ppp1cc	9.39545e-06	0.19053	0.994	0.976	5.66191e-05
Ilf2	9.65197e-06	0.190173	0.989	0.974	5.80634e-05
Cops8	9.75707e-06	0.199372	0.897	0.848	5.84781e-05
Rpl36a-ps1	9.76039e-06	-0.11003	0.4	0.475	5.84781e-05
Me2	9.7718e-06	0.212593	0.636	0.541	5.84781e-05
Tia1	9.95578e-06	0.209169	0.956	0.932	5.94758e-05
Fam133b	1.01992e-05	0.206522	0.941	0.888	6.08245e-05
Tnfaip8	1.04108e-05	-0.145027	0.554	0.581	6.19793e-05
Itpa	1.06193e-05	0.203868	0.874	0.768	6.31117e-05
Spint2	1.10291e-05	-0.145404	0.688	0.74	6.5434e-05
Supt16	1.10774e-05	0.222017	0.987	0.96	6.55628e-05
Eif2s3y	1.10888e-05	0.239288	0.429	0.249	6.55628e-05
Tesk1	1.12431e-05	0.191416	0.638	0.486	6.63612e-05
Gars	1.1311e-05	0.210412	0.884	0.848	6.66478e-05
Cystm1	1.14398e-05	-0.175117	0.347	0.408	6.72916e-05
Gipc2	1.15979e-05	-0.352742	0.101	0.249	6.81053e-05
Rcc1	1.16213e-05	0.201335	0.691	0.585	6.81266e-05
Sf3a2	1.16856e-05	0.203986	0.781	0.7	6.83873e-05
Hmga2	1.17334e-05	0.24759	0.813	0.718	6.85508e-05
Gsk3a	1.18259e-05	0.201608	0.709	0.607	6.89745e-05
Scaper	1.20864e-05	-0.117921	0.417	0.506	7.03745e-05
mt-Co3	1.21807e-05	0.184128	0.998	1	7.08041e-05
Pecr	1.27746e-05	-0.121569	0.592	0.618	7.41314e-05
Phf20l1	1.32039e-05	0.211877	0.832	0.784	7.6494e-05
Pdrg1	1.32629e-05	0.194289	0.739	0.578	7.67065e-05
Nedd4l	1.33945e-05	-0.155094	0.278	0.353	7.73378e-05
Rcn3	1.36562e-05	0.249389	0.941	0.828	7.87172e-05
Mrpl13	1.39053e-05	0.186582	0.971	0.949	7.98903e-05
Pclaf	1.3906e-05	0.228462	0.994	0.976	7.98903e-05
Taf3	1.39545e-05	0.206517	0.707	0.59	8.0035e-05
Myof	1.41106e-05	-0.142583	0.297	0.377	8.07962e-05
Copz1	1.41738e-05	0.197551	0.88	0.817	8.09751e-05
Kank1	1.41888e-05	-0.118759	0.352	0.431	8.09751e-05
Dusp14	1.50032e-05	-0.212018	0.227	0.309	8.54809e-05
Cenpu	1.52475e-05	0.193259	0.503	0.375	8.67295e-05
Txndc9	1.5336e-05	0.197271	0.931	0.896	8.70894e-05
Tubb5	1.57802e-05	0.191575	1	1	8.94646e-05
Ptk7	1.59396e-05	0.202911	0.731	0.658	9.02199e-05
Smim15	1.60172e-05	-0.102449	0.728	0.788	9.03891e-05
U2af1	1.6022e-05	0.178195	0.992	0.993	9.03891e-05
Slc35b4	1.61518e-05	-0.163933	0.288	0.342	9.09207e-05
Mcm3	1.6169e-05	0.236477	0.899	0.863	9.09207e-05
Hdgfl3	1.65578e-05	0.221355	0.84	0.746	9.29556e-05
Gstk1	1.6842e-05	0.226468	0.366	0.21	9.42482e-05
Ly6a	1.6859e-05	-0.345915	0.274	0.338	9.42482e-05
Ctnnb1	1.68701e-05	0.199305	0.985	0.98	9.42482e-05
Chchd10	1.71114e-05	-0.167556	0.84	0.87	9.54415e-05
Adat2	1.74179e-05	-0.109222	0.352	0.428	9.69944e-05
Nsmce4a	1.76905e-05	0.188322	0.987	0.973	9.83537e-05
Lama1	1.7745e-05	-0.165804	0.394	0.512	9.83701e-05
Arglu1	1.77542e-05	0.197078	0.994	0.973	9.83701e-05
Noc4l	1.77791e-05	0.192885	0.674	0.581	9.83701e-05
Srsf1	1.78175e-05	0.206587	0.956	0.92	9.84245e-05
Cct3	1.79718e-05	0.171992	1	0.996	9.91181e-05
H2-K1	1.91401e-05	-0.180186	0.274	0.324	0.000105393
Ip6k2	1.95006e-05	0.199707	0.701	0.614	0.000107207
Paqr5	1.97073e-05	-0.295584	0.099	0.245	0.00010817
Got1	1.97898e-05	0.199432	0.781	0.654	0.000108451
Aes	1.98233e-05	0.198798	0.998	0.998	0.000108462
Tra2a	2.00185e-05	0.188431	0.989	0.98	0.000109356
Gon7	2.01912e-05	0.224552	0.604	0.532	0.000110125
Rrm2	2.03164e-05	0.270589	0.88	0.828	0.000110633
Nxt1	2.04023e-05	0.20659	0.903	0.826	0.000110925
Fos	2.06452e-05	-0.232965	0.68	0.704	0.000112069
Slc35b2	2.09962e-05	0.197971	0.754	0.676	0.000113617
Eif4a3	2.09962e-05	0.187285	0.968	0.947	0.000113617
Itgav	2.11385e-05	-0.142914	0.404	0.433	0.000114208
Rnf157	2.13904e-05	0.202048	0.459	0.333	0.000115388
Polr2d	2.15644e-05	0.190048	0.867	0.761	0.000116144
Med13l	2.19123e-05	0.203961	0.568	0.461	0.000117834
Eif4g2	2.20239e-05	0.191855	0.998	1	0.00011825
Ankrd37	2.22123e-05	-0.12297	0.389	0.453	0.000119076
P4hb	2.22706e-05	0.2144	0.945	0.918	0.000119203
Sfrp1	2.24351e-05	0.317091	0.474	0.309	0.000119897
Fnbp4	2.26709e-05	0.193712	0.722	0.592	0.00012097
Parl	2.29521e-05	0.192003	0.844	0.757	0.000122281
Adamts16	2.31814e-05	-0.213919	0.156	0.283	0.000123312
Eml2	2.36592e-05	-0.116967	0.309	0.4	0.00012566
Cars	2.37636e-05	0.191375	0.583	0.481	0.00012602
1500009L16Rik	2.39146e-05	0.209802	0.621	0.468	0.000126626
Triap1	2.4172e-05	0.191824	0.669	0.55	0.00012775
Slc12a2	2.4201e-05	0.236654	0.707	0.554	0.00012775
Romo1	2.45273e-05	0.18782	0.994	0.982	0.000129275
Cfl2	2.47601e-05	0.19721	0.949	0.936	0.000130303
Phldb2	2.48999e-05	-0.106363	0.872	0.881	0.000130838
Grwd1	2.50929e-05	0.194427	0.745	0.633	0.000131652
Ccdc8	2.51528e-05	-0.100932	0.509	0.547	0.000131765
Bcam	2.5544e-05	0.263031	0.84	0.771	0.000133612
Nucks1	2.56402e-05	0.189619	1	0.995	0.000133912
Dpp3	2.57987e-05	0.197575	0.754	0.656	0.000134536
Napa	2.5853e-05	0.191012	0.884	0.817	0.000134615
Bola2	2.64709e-05	0.185123	0.968	0.952	0.000137625
Tbc1d10a	2.66124e-05	0.216537	0.623	0.505	0.000138152
Rab6a	2.6764e-05	0.197244	0.869	0.803	0.00013873
Pfdn2	2.72758e-05	0.178476	0.985	0.976	0.000141171
Pcbp2	2.77425e-05	0.177164	0.989	0.991	0.000143371
Slc48a1	2.80133e-05	-0.109466	0.516	0.59	0.000144554
Baz1b	2.84473e-05	0.263911	0.928	0.903	0.000146574
Ppp2ca	2.85045e-05	0.178509	0.989	0.984	0.000146649
Spsb3	2.86371e-05	0.1796	0.514	0.395	0.000147018
Dad1	2.86615e-05	0.184047	0.989	0.985	0.000147018
Sec11a	2.89162e-05	0.182538	0.973	0.965	0.000148104
Elovl6	2.90644e-05	0.223296	0.842	0.77	0.000148642
Snrpb	2.92321e-05	0.167923	0.998	0.998	0.000149279
Twf2	2.95282e-05	0.195802	0.695	0.583	0.000150567
Nop56	2.96625e-05	0.191106	0.981	0.971	0.000151029
Msi1	3.09995e-05	0.1921	0.429	0.298	0.000157604
Rnf219	3.19334e-05	0.190685	0.651	0.559	0.000162113
Ddit4	3.20314e-05	-0.139135	0.293	0.391	0.000162371
Rreb1	3.2183e-05	-0.102977	0.364	0.47	0.0001629
Ptpra	3.22803e-05	0.195201	0.802	0.735	0.000163153
Cyr61	3.24178e-05	-0.220541	0.432	0.501	0.000163608
Ltbp1	3.24772e-05	0.283269	0.747	0.594	0.000163668
Eif1ad	3.26406e-05	0.1961	0.829	0.74	0.000164251
Calr	3.27125e-05	0.237209	0.989	0.995	0.000164373
Cebpg	3.30606e-05	0.199555	0.804	0.7	0.000165723
Cct2	3.30773e-05	0.168328	0.996	0.998	0.000165723
Txn2	3.34035e-05	0.193296	0.954	0.934	0.000167114
Col4a5	3.38138e-05	-0.142521	0.253	0.324	0.000168922
Fbn2	3.38968e-05	0.262419	0.857	0.764	0.000169091
Mettl16	3.39737e-05	0.19239	0.768	0.726	0.00016923
Chd1	3.41274e-05	0.205603	0.878	0.806	0.000169751
Zfp157	3.43215e-05	-0.100208	0.423	0.519	0.00017047
Nop14	3.43881e-05	0.197839	0.848	0.761	0.000170555
Tead2	3.49509e-05	0.200111	0.968	0.929	0.000173097
Map4k4	3.51166e-05	0.212809	0.914	0.856	0.000173668
Steap2	3.61999e-05	-0.193518	0.232	0.342	0.000178769
Selenoh	3.72052e-05	0.171747	1	0.998	0.000183471
Tdg	3.8058e-05	0.196836	0.853	0.817	0.000187408
Mgst1	3.82252e-05	-0.147439	0.714	0.795	0.000187963
Cdh4	3.85364e-05	0.26197	0.709	0.559	0.000189224
Gli3	3.91317e-05	0.184883	0.474	0.346	0.000191873
Auts2	3.93621e-05	0.210494	0.96	0.941	0.000192729
Fam192a	3.94667e-05	0.190352	0.817	0.746	0.000192967
Ddx18	4.0039e-05	0.199518	0.928	0.938	0.000195488
Hdhd3	4.03045e-05	-0.178297	0.141	0.289	0.000196506
Pbx1	4.05667e-05	0.257378	0.916	0.888	0.000197505
Homer2	4.06809e-05	0.201537	0.608	0.479	0.000197778
Mcmdc2	4.07375e-05	-0.296534	0.097	0.232	0.000197778
Ccm2	4.30199e-05	0.177463	0.589	0.441	0.000208565
Phip	4.37981e-05	0.211886	0.952	0.932	0.000212039
Stx17	4.56738e-05	-0.107737	0.333	0.428	0.00022081
Hmgb2	4.57668e-05	0.211162	1	0.996	0.00022095
6330403K07Rik	4.6252e-05	0.212362	0.503	0.351	0.00022298
Cited1	4.66095e-05	0.470975	0.554	0.475	0.000224379
Itga9	4.66724e-05	0.239779	0.396	0.263	0.000224379
Prdx4	4.77405e-05	0.182129	0.973	0.96	0.000229194
Gm8186	4.80125e-05	0.195535	0.857	0.786	0.000230123
Nudcd2	4.80676e-05	0.202288	0.964	0.945	0.000230123
Copb2	4.84647e-05	0.196613	0.971	0.907	0.000231703
Mars	4.88819e-05	0.192679	0.718	0.644	0.000233374
Chordc1	4.90763e-05	0.199935	0.806	0.74	0.000233978
Uhrf2	4.91949e-05	0.204566	0.907	0.885	0.000234103
Nr3c1	4.92384e-05	-0.112668	0.408	0.486	0.000234103
2022-09-09	4.94281e-05	0.187944	0.556	0.435	0.000234682
Phf23	5.09063e-05	0.191034	0.777	0.707	0.000241367
Plat	5.09882e-05	0.272773	0.592	0.477	0.000241423
Zfp846	5.1064e-05	0.192293	0.413	0.283	0.000241451
Smim12	5.16198e-05	0.183441	0.701	0.609	0.000243745
Cenps	5.17998e-05	0.199256	0.712	0.596	0.00024426
Nudt4	5.18765e-05	-0.102172	0.859	0.854	0.000244287
Paip2	5.22586e-05	0.182074	0.994	0.989	0.000245751
Atp5f1	5.26859e-05	0.157535	1	0.998	0.000247423
Tcerg1	5.29933e-05	0.207927	0.933	0.918	0.000248528
Nipsnap2	5.36993e-05	-0.116882	0.577	0.563	0.000251497
Dpysl2	5.38767e-05	0.196533	0.583	0.433	0.000251985
Hnrnpf	5.47018e-05	0.164652	1	0.996	0.000255497
Dhcr24	5.5912e-05	0.201615	0.459	0.338	0.000260797
Cald1	5.60795e-05	0.287778	0.836	0.662	0.000261224
Uba2	5.65591e-05	0.189217	0.971	0.965	0.000263103
Psmc1	5.94921e-05	0.186763	0.96	0.932	0.000276374
Eftud2	5.95918e-05	0.190295	0.872	0.837	0.000276464
Polr2a	5.98923e-05	0.198001	0.905	0.883	0.000277485
Grcc10	6.18121e-05	0.187725	0.752	0.673	0.000285995
Phyh	6.20347e-05	-0.108821	0.381	0.431	0.00028664
Tbpl1	6.21571e-05	0.191778	0.733	0.636	0.00028671
Tsn	6.22162e-05	0.1779	0.985	0.991	0.00028671
Scaf1	6.24785e-05	0.186205	0.722	0.603	0.000287535
Arhgef16	6.27001e-05	-0.1932	0.143	0.298	0.00028817
Dnajc9	6.32977e-05	0.193738	0.956	0.929	0.000290529
Smagp	6.39871e-05	-0.196145	0.461	0.51	0.000293303
Thnsl2	6.4586e-05	-0.236963	0.183	0.269	0.000295655
Cmtm3	6.47035e-05	0.203684	0.577	0.499	0.0002958
Gorasp2	6.48155e-05	0.202426	0.707	0.638	0.000295919
Coq5	6.66098e-05	0.183763	0.745	0.616	0.000303323
Mrps5	6.66132e-05	0.186701	0.928	0.898	0.000303323
Ss18	6.67371e-05	0.190034	0.811	0.689	0.000303486
Gprc5c	6.72486e-05	-0.115731	0.583	0.611	0.00030541
Gss	6.74076e-05	-0.110798	0.364	0.433	0.000305729
Fyn	7.01513e-05	0.200466	0.638	0.527	0.000317755
Alg13	7.0712e-05	0.174866	0.482	0.335	0.000319874
Rcc2	7.12466e-05	0.191251	0.977	0.956	0.00032187
Sap18	7.19678e-05	0.189015	0.922	0.914	0.000324703
Eif4a1	7.2618e-05	0.155869	1	1	0.000327208
2610524H06Rik	7.34506e-05	0.200506	0.813	0.753	0.000330528
Ftsj3	7.497e-05	0.192843	0.821	0.773	0.000336925
Pitpnc1	7.53565e-05	-0.123559	0.4	0.473	0.000338221
Mtpn	7.64572e-05	0.186764	0.897	0.835	0.000342715
Psmb3	7.69241e-05	0.187547	0.998	0.985	0.00034436
Sumo3	7.70663e-05	0.190091	0.962	0.936	0.000344549
Dynlt1f	7.99957e-05	0.191829	0.912	0.865	0.000356889
Wwtr1	8.00335e-05	-0.112877	0.436	0.479	0.000356889
Actb	8.18727e-05	0.184127	1	1	0.000364619
Gpc1	8.20876e-05	0.18267	0.543	0.402	0.000365057
Ccdc86	8.22471e-05	0.19305	0.766	0.731	0.000365057
1700037H04Rik	8.22886e-05	0.18353	0.625	0.499	0.000365057
Haus8	8.26912e-05	0.186366	0.655	0.554	0.000366371
Pantr1	8.48563e-05	-0.224299	0.196	0.307	0.000375481
Meis2	8.52056e-05	0.293316	0.863	0.757	0.000376543
Kif21a	8.63663e-05	-0.115414	0.535	0.554	0.000381184
Golga7	8.67756e-05	0.18865	0.838	0.737	0.000382501
Fam149a	8.75658e-05	-0.14069	0.225	0.346	0.000385491
Pcna	8.85003e-05	0.220203	0.726	0.658	0.000389108
Mapk13	8.88624e-05	-0.159942	0.244	0.318	0.000389712
Rtf1	8.88638e-05	0.178199	0.987	0.973	0.000389712
Npm3	8.92594e-05	0.212196	0.954	0.914	0.000390949
Arf4	9.28047e-05	0.176388	0.987	0.98	0.000405962
Gk	9.37362e-05	-0.158743	0.255	0.331	0.000409517
Efs	9.48447e-05	0.1861	0.425	0.285	0.000413835
Stx7	9.6304e-05	-0.110772	0.501	0.556	0.000419671
Rcbtb2	9.72376e-05	0.18824	0.901	0.803	0.000423204
Psmd1	9.78915e-05	0.189365	0.947	0.916	0.000425513
Acin1	9.81172e-05	0.186841	0.992	0.982	0.000425957
Atf4	9.84653e-05	0.196256	0.92	0.896	0.000426931
Mrps10	9.92351e-05	0.185823	0.813	0.751	0.000429728
Arhgef28	0.000100189	-0.135589	0.337	0.386	0.000433315
Pi4k2a	0.000101406	0.183652	0.613	0.532	0.000438029
S100a1	0.000102788	-0.11442	0.552	0.589	0.000443444
Trps1	0.000102929	-0.123642	0.554	0.594	0.000443495
Ctps	0.000103383	0.193652	0.804	0.704	0.000444896
Tspan3	0.000103727	0.172454	0.981	0.985	0.000445817
Ahsa2	0.000105038	0.177696	0.686	0.585	0.000450893
Srsf10	0.000105334	0.177686	0.975	0.973	0.000451601
Tfcp2l1	0.000106112	-0.248986	0.103	0.229	0.000454372
Cops3	0.000110305	0.183157	0.96	0.916	0.000471739
Orc6	0.000110612	0.205275	0.874	0.814	0.000472464
Sgk3	0.000110931	-0.138486	0.293	0.349	0.000473241
Chmp6	0.00011513	0.182342	0.701	0.587	0.000490548
Ckb	0.000117049	0.262193	0.465	0.338	0.000498107
Etv4	0.000118032	0.242073	0.594	0.495	0.000501674
F11r	0.000118403	0.185586	0.789	0.717	0.000502628
Tor1aip1	0.000120303	0.178428	0.676	0.572	0.000510066
Fkbp9	0.000120612	0.182101	0.682	0.569	0.000510751
Psmb6	0.000121049	0.167448	0.998	0.995	0.000511969
Ppp2r2d	0.000122875	0.188091	0.794	0.695	0.000519056
Six2	0.000123463	0.350353	0.549	0.426	0.000520902
Rras	0.000124147	-0.135024	0.303	0.338	0.000523147
Mrpl38	0.000126395	0.187016	0.882	0.83	0.000531971
Rbmx	0.000127906	0.193726	0.901	0.85	0.000537644
Rbm15b	0.000128055	0.176561	0.642	0.512	0.000537644
Ssr3	0.000129927	0.184096	0.941	0.905	0.000544268
Klf6	0.000129948	-0.157906	0.339	0.36	0.000544268
Bzw1	0.000131285	0.179395	0.998	0.991	0.000549199
Snrnp40	0.000131906	0.180259	0.952	0.929	0.000551127
Sparc	0.000134161	0.298987	0.979	0.934	0.000559871
Yeats4	0.000135383	0.187233	0.958	0.912	0.000564287
Matr3	0.000138554	0.182277	0.983	0.98	0.000576807
Pole3	0.000139382	0.184638	0.92	0.91	0.000579553
Ifrd1	0.000140337	0.181918	0.627	0.563	0.000582821
Prelid3b	0.000143654	0.188636	0.741	0.642	0.000595877
Dnaja2	0.000144387	0.185443	0.979	0.956	0.000598199
Shroom3	0.000144747	0.183234	0.507	0.399	0.000598973
Prr15l	0.000145721	-0.224543	0.135	0.234	0.00060228
Phc2	0.000147265	0.180355	0.806	0.7	0.000607932
Hmgcr	0.000148436	0.196414	0.724	0.547	0.000612031
Rnf4	0.000149045	0.188626	0.825	0.739	0.000613808
Tcf3	0.000152151	0.182277	0.945	0.923	0.000625167
Mrpl55	0.000152166	0.180719	0.829	0.786	0.000625167
Pum1	0.000152915	0.185283	0.943	0.936	0.000627245
Mfap1b	0.000153035	0.172958	0.503	0.38	0.000627245
Nav1	0.000155504	0.193859	0.499	0.38	0.000635888
Calm2	0.000155513	0.194834	1	1	0.000635888
Evl	0.000156249	0.181013	0.901	0.839	0.000638141
Ywhah	0.000156776	0.19287	0.966	0.936	0.000639536
Eif3l	0.00015914	0.168131	0.987	0.976	0.00064841
Snrpd3	0.000160801	0.168494	0.998	0.991	0.000654403
Abhd8	0.000161213	0.170722	0.632	0.525	0.000655309
Tmpo	0.000165424	0.180641	0.996	0.987	0.000671633
Rac1	0.00016907	0.178235	0.964	0.958	0.00068563
Rbm14	0.000169664	0.173891	0.617	0.495	0.000687231
Elavl1	0.000170278	0.177892	0.975	0.941	0.000688905
Vldlr	0.000172486	-0.149389	0.255	0.34	0.00069702
Wbp11	0.000174101	0.181367	0.964	0.941	0.000702726
Elob	0.000174341	0.178715	0.998	0.996	0.000702868
Nubp2	0.000176505	0.169855	0.526	0.4	0.000710762
Ebna1bp2	0.000178418	0.172994	0.964	0.934	0.00071763
Mitd1	0.000182072	0.168475	0.577	0.457	0.000731472
Ostc	0.000183907	0.187225	0.971	0.965	0.00073784
Rab20	0.000184136	-0.170977	0.196	0.314	0.00073784
Ythdf2	0.00018449	0.184151	0.853	0.81	0.00073784
Asf1a	0.000184513	0.191525	0.926	0.89	0.00073784
Dtymk	0.000185736	0.17755	0.968	0.965	0.000741867
Timp2	0.000186588	0.2226	0.895	0.823	0.000744407
Slc35b1	0.000187918	0.178395	0.691	0.581	0.000748847
2022-03-05	0.000188157	0.177518	0.945	0.896	0.000748934
Kat6a	0.000188519	0.195065	0.661	0.583	0.000749509
Gfer	0.000191453	0.176903	0.8	0.675	0.000760297
A730017C20Rik	0.000195947	0.211629	0.52	0.4	0.000777248
Ntm	0.000196761	-0.172949	0.253	0.371	0.000779582
Cirbp	0.000197805	0.187957	0.861	0.773	0.000782817
Tmem27	0.000200128	-0.220603	0.171	0.274	0.000791101
Get4	0.000201506	0.176021	0.701	0.616	0.000795638
Pimreg	0.000205026	0.224647	0.693	0.581	0.000808608
Pmepa1	0.000206677	-0.133653	0.368	0.433	0.000814189
Gas1	0.000211524	0.226634	0.872	0.808	0.000832331
Tmem98	0.000211989	0.166188	0.585	0.47	0.000833212
mt-Atp6	0.000213085	0.149128	1	1	0.000836564
Rpap3	0.000214011	0.18468	0.8	0.735	0.000839244
Srebf2	0.000215006	0.190903	0.72	0.614	0.000842189
Nid2	0.000215837	0.191508	0.467	0.351	0.000844485
Csnk2b	0.00021887	0.173423	0.979	0.962	0.00085527
Eif3a	0.00021909	0.186045	1	1	0.00085527
Stk4	0.000220325	0.171019	0.56	0.455	0.000859116
Nr2f2	0.000221827	0.248201	0.947	0.914	0.000863566
Sumo1	0.000221967	0.166175	0.989	0.995	0.000863566
Prss8	0.000224825	-0.190264	0.187	0.272	0.000873698
Cyth3	0.000226212	0.204352	0.579	0.499	0.000878098
Ncl	0.00022756	0.195249	1	0.996	0.000882337
Smc1a	0.000232741	0.206914	0.992	0.987	0.000901414
Fxyd6	0.000233284	0.225975	0.939	0.846	0.000902504
Kansl2	0.000233778	0.173663	0.817	0.695	0.000903401
Enpp2	0.000235518	-0.181563	0.341	0.408	0.000909103
Denr	0.000237707	0.177911	0.968	0.973	0.000916363
Cbfb	0.00023793	0.162594	0.594	0.457	0.000916363
Mapk6	0.000239235	0.167168	0.533	0.411	0.000920361
Rspo1	0.000239646	0.230006	0.8	0.678	0.000920912
Polr2i	0.000241253	0.176852	0.935	0.92	0.000926057
Wwc1	0.000241802	-0.107822	0.432	0.47	0.000927133
Ruvbl1	0.000244291	0.178703	0.956	0.949	0.000935636
Col3a1	0.000244659	0.419569	0.507	0.32	0.000936004
Eif1a	0.000246415	0.189194	0.899	0.89	0.000941676
Ahcy	0.000248101	0.168179	0.493	0.386	0.000946728
Nt5c3b	0.000248286	0.181316	0.779	0.751	0.000946728
Cndp2	0.00025099	-0.119476	0.651	0.68	0.00095598
Rad23a	0.000253852	0.171693	0.632	0.494	0.000965816
Ptges3	0.000254399	0.186937	0.987	0.991	0.000966829
Carhsp1	0.00025561	0.183506	0.659	0.569	0.000970362
Mob2	0.00025605	0.165278	0.667	0.545	0.000970962
Tsix	0.000259712	-0.1482	0.181	0.283	0.000983162
Cdca7	0.000259838	0.210819	0.832	0.77	0.000983162
Zfp697	0.000260451	-0.118789	0.318	0.36	0.000984179
Des	0.000260951	-0.195338	0.204	0.249	0.000984179
Svopl	0.000260963	0.245505	0.337	0.232	0.000984179
Kars	0.000265739	0.17543	0.857	0.779	0.00100009
Mapre2	0.000265761	0.172104	0.438	0.276	0.00100009
Dcp2	0.000266543	0.170666	0.678	0.552	0.00100193
Cldn1	0.000267285	-0.291493	0.114	0.183	0.00100363
Mpzl1	0.000269427	0.190585	0.897	0.828	0.00101057
Stard10	0.000275265	-0.191653	0.52	0.57	0.00103135
Msra	0.000279713	0.167466	0.524	0.373	0.00104688
Rnase12	0.000287133	0.273592	0.278	0.152	0.00107348
Snrpc	0.000287874	0.170602	0.971	0.98	0.00107508
Slc7a1	0.00028857	0.186705	0.459	0.307	0.00107652
Helz	0.000292935	0.200956	0.785	0.757	0.00109162
Hoxb6	0.000293484	-0.101694	0.653	0.642	0.00109248
Hgsnat	0.000296457	-0.118705	0.234	0.316	0.00110131
Tmem165	0.000296704	0.174992	0.949	0.901	0.00110131
Eif2s2	0.000296814	0.165873	0.996	1	0.00110131
Enpep	0.000298798	-0.130269	0.398	0.441	0.00110748
Fkbp8	0.000299988	0.174113	0.962	0.931	0.0011107
Slirp	0.000300964	0.174209	0.931	0.899	0.00111312
Ncbp1	0.000302655	0.183757	0.726	0.678	0.00111817
Rnf26	0.000303037	0.173039	0.709	0.623	0.00111838
Commd7	0.000303675	0.181313	0.705	0.64	0.00111954
Abr	0.000304752	0.166853	0.56	0.466	0.00112231
Anp32e	0.000305338	0.188723	0.992	0.974	0.00112327
Dhcr7	0.000306768	0.166356	0.451	0.314	0.00112628
Arpc1b	0.000307095	0.212996	0.802	0.726	0.00112628
Ppp4c	0.000307392	0.179326	0.84	0.81	0.00112628
Hist1h3b	0.000307465	0.181902	0.394	0.263	0.00112628
Calm1	0.000309259	0.192075	1	0.996	0.00113165
Spdl1	0.000319538	0.201022	0.627	0.53	0.00116803
Wbp1	0.00032351	0.181467	0.848	0.764	0.00118074
Pak1ip1	0.000323702	0.176785	0.909	0.887	0.00118074
Usp14	0.000324651	0.181499	0.914	0.874	0.00118295
Entpd5	0.000326098	-0.162674	0.168	0.278	0.00118697
Nktr	0.000326561	0.189828	0.918	0.888	0.0011874
Grb14	0.000327233	-0.119321	0.301	0.364	0.00118859
Sec61a2	0.000327753	0.161269	0.543	0.413	0.00118922
Ostf1	0.000329579	-0.106624	0.503	0.527	0.0011933
Mrpl27	0.000329832	0.176346	0.806	0.724	0.0011933
Rab26os	0.000329914	0.182064	0.383	0.285	0.0011933
Mrpl48	0.00033219	0.177521	0.891	0.834	0.00120027
Tet2	0.000334457	-0.108538	0.297	0.367	0.0012072
Qtrt1	0.000336955	0.170174	0.655	0.576	0.00121494
Crym	0.000343639	0.295875	0.501	0.413	0.00123775
Clcn4	0.000344359	0.168189	0.606	0.519	0.00123904
Naga	0.000349208	-0.126843	0.236	0.298	0.00125518
Phactr1	0.000349977	0.19854	0.463	0.316	0.00125663
Syncrip	0.000350681	0.182535	0.964	0.956	0.00125785
Pop4	0.000351593	0.16666	0.665	0.532	0.00125981
Ndufv1	0.000356355	0.168806	0.966	0.951	0.00127555
Got2	0.00036108	0.172518	0.956	0.918	0.00129005
Ccnd2	0.000361404	0.325425	0.808	0.715	0.00129005
Polr1e	0.000361528	0.163385	0.472	0.353	0.00129005
Cenpw	0.000362968	0.185518	0.949	0.888	0.00129385
Gfra1	0.00037354	0.191349	0.438	0.285	0.00133016
Espn	0.000375364	0.240127	0.674	0.548	0.00133527
Sdhb	0.000377907	0.169542	0.973	0.967	0.00134293
Itga8	0.000385701	0.223489	0.421	0.324	0.00136922
Rbm28	0.000388433	0.181572	0.886	0.826	0.0013775
Mxd4	0.000394287	0.210439	0.629	0.58	0.00139682
Flna	0.000403075	0.209464	0.829	0.737	0.00142649
Ipo5	0.000406022	0.184609	0.897	0.837	0.00143544
Srp9	0.000407828	0.162859	0.971	0.971	0.00143878
Amacr	0.000408011	-0.115729	0.274	0.366	0.00143878
Prpf31	0.000408218	0.172443	0.918	0.861	0.00143878
Prr15	0.00041206	-0.171407	0.147	0.261	0.00145073
Bcl2l11	0.00041245	0.169766	0.558	0.448	0.00145073
H13	0.000414212	0.175896	0.853	0.804	0.00145544
Gapdh	0.000416857	0.155844	1	1	0.00146231
Ctdnep1	0.000417016	0.17992	0.817	0.764	0.00146231
Polb	0.000421303	0.174657	0.726	0.671	0.00147584
Ino80	0.000433202	0.166677	0.533	0.431	0.00151481
Hist1h3c	0.00043338	0.205253	0.625	0.536	0.00151481
Mthfsd	0.000433744	0.160354	0.514	0.411	0.00151481
Selenos	0.000434958	0.181575	0.867	0.782	0.00151751
Eya4	0.000435897	0.201489	0.575	0.433	0.00151925
Timm50	0.000437931	0.174852	0.92	0.876	0.0015248
Spsb2	0.000440254	-0.155874	0.189	0.267	0.00153134
Pelp1	0.000442445	0.172527	0.747	0.651	0.00153741
Eif3b	0.000443392	0.191624	0.943	0.907	0.00153915
Rnf167	0.000443872	0.16146	0.583	0.483	0.00153926
Fam49b	0.000448791	0.192494	0.804	0.729	0.00155475
Dcn	0.000451794	0.460758	0.387	0.19	0.00156359
Ccz1	0.000452834	0.171749	0.834	0.761	0.00156562
Lta4h	0.00045603	0.178039	0.737	0.684	0.00157509
Nelfcd	0.000458438	0.170314	0.848	0.744	0.00158182
Pithd1	0.000460853	0.157702	0.503	0.399	0.00158848
Epop	0.000461291	0.162969	0.522	0.413	0.00158848
Hspa4	0.000462165	0.194815	0.971	0.956	0.00158904
Wtap	0.000462375	0.172298	0.785	0.731	0.00158904
Dtnbp1	0.000467981	0.1713	0.819	0.753	0.0016067
Mrps18a	0.000471335	0.170677	0.922	0.91	0.00161633
Surf4	0.000471723	0.179674	0.789	0.742	0.00161633
Col1a1	0.00047711	0.389813	0.581	0.384	0.00163317
Puf60	0.00048372	0.169482	0.975	0.971	0.00165415
Mrps22	0.000492006	0.17023	0.768	0.711	0.00168082
Arl16	0.000496176	0.162944	0.436	0.309	0.00169197
Khdrbs3	0.000496252	0.207561	0.855	0.808	0.00169197
Ptrhd1	0.000498734	0.162884	0.661	0.556	0.00169875
AU020206	0.000502713	0.162214	0.446	0.331	0.00171035
Oser1	0.000503133	0.166927	0.794	0.667	0.00171035
Macrod1	0.000504332	-0.120153	0.269	0.318	0.00171274
Mylip	0.000505042	0.195867	0.347	0.227	0.00171347
Uhrf1	0.000509165	0.197796	0.876	0.817	0.0017246
Taf5l	0.000509324	0.161085	0.453	0.335	0.0017246
Cdca5	0.000512582	0.173861	0.617	0.475	0.00173393
E2f3	0.000515647	0.188104	0.771	0.682	0.00174258
Akap8	0.000517259	0.184365	0.796	0.695	0.00174632
Mrpl3	0.000523065	0.17123	0.859	0.77	0.00176419
Zfp503	0.000525928	0.216316	0.914	0.823	0.00177212
Zfp422	0.000528196	0.171409	0.907	0.881	0.00177802
Pycrl	0.000529178	0.173697	0.779	0.702	0.00177959
Ndufs4	0.000532178	0.160278	0.979	0.954	0.00178793
Rbm10	0.000533732	0.171644	0.775	0.695	0.00179141
Luzp1	0.000541227	0.187608	0.884	0.848	0.00181471
Mrps36	0.000541728	0.177128	0.903	0.867	0.00181471
Crkl	0.00054232	0.159131	0.48	0.358	0.00181493
Cpsf6	0.000546252	0.177739	0.939	0.89	0.00182631
Cdk11b	0.00055455	0.187921	0.918	0.837	0.00185226
Lmnb2	0.000557932	0.157994	0.613	0.472	0.00186175
Cct7	0.000559802	0.160421	0.998	0.998	0.00186468
Gart	0.000559892	0.1756	0.842	0.799	0.00186468
Mrps12	0.000565504	0.173569	0.886	0.821	0.00188156
Snhg6	0.000567012	0.166806	0.745	0.647	0.00188475
Nelfa	0.000571305	0.165785	0.676	0.587	0.00189719
Gbf1	0.000571955	0.17258	0.629	0.505	0.00189753
Ranbp3	0.000578421	0.162382	0.665	0.585	0.00191713
Sall1	0.000584178	0.194982	0.787	0.711	0.00193435
Nsdhl	0.000584765	0.17035	0.509	0.36	0.00193444
Tma16	0.000587596	0.168815	0.718	0.664	0.00194194
Mak16	0.000588936	0.185466	0.811	0.729	0.0019445
Mdn1	0.000590777	0.19117	0.528	0.452	0.00194871
Taldo1	0.00059413	0.185552	0.979	0.969	0.0019579
Kif5b	0.000594997	0.170234	0.968	0.971	0.00195889
Klhl9	0.00060422	0.167626	0.644	0.539	0.00198735
Hoxc9	0.000607182	0.197123	0.855	0.773	0.00199495
Nsrp1	0.000607687	0.183825	0.924	0.868	0.00199495
Npy	0.000609179	-0.24292	0.402	0.402	0.00199794
Gadd45b	0.000632638	-0.171535	0.225	0.293	0.00207291
Xpo6	0.000633556	0.161732	0.564	0.461	0.00207395
Pkig	0.000636629	0.166098	0.96	0.94	0.00207944
Tmed9	0.000636923	0.180841	0.994	0.987	0.00207944
Serp1	0.000637043	0.171216	0.872	0.815	0.00207944
Rpn2	0.000639503	0.171596	0.973	0.947	0.00208549
Ogfrl1	0.000642614	0.199282	0.737	0.649	0.00209366
Mad2l2	0.000644303	0.166931	0.669	0.548	0.00209664
Hpf1	0.000644747	0.167585	0.941	0.905	0.00209664
Ube2i	0.000650084	0.163675	0.994	0.998	0.00211201
Pold2	0.000655278	0.18089	0.817	0.77	0.00212688
Hdlbp	0.000667186	0.18326	0.958	0.925	0.00216349
Sqle	0.000672697	0.190677	0.688	0.578	0.00217886
Camsap1	0.000673191	0.161378	0.575	0.483	0.00217886
Rnf122	0.000676798	0.177374	0.467	0.356	0.00218848
Mvk	0.000680564	0.16699	0.634	0.554	0.0021986
Rpl7a	0.000682463	0.1245	1	1	0.00220267
Dph3	0.000687224	0.17488	0.924	0.894	0.0022144
Ddost	0.000687382	0.176991	0.975	0.976	0.0022144
Zfp462	0.000688393	0.193221	0.661	0.569	0.00221558
Scara3	0.000697249	0.169707	0.408	0.263	0.00224199
Morf4l1	0.000701771	0.160926	0.998	1	0.00225443
Zfp593	0.000705521	0.176774	0.663	0.601	0.00226437
Acp1	0.000707211	0.164726	0.975	0.976	0.00226662
Mfap2	0.000708634	0.212702	0.758	0.644	0.00226662
Bloc1s1	0.000708658	0.157748	0.434	0.335	0.00226662
Ncln	0.000708855	0.164256	0.608	0.527	0.00226662
Praf2	0.000712098	0.15796	0.533	0.426	0.00227488
Cobll1	0.000727031	-0.157413	0.175	0.26	0.00232044
Rrp8	0.000733615	0.163708	0.644	0.57	0.00233929
Wdr75	0.000735354	0.173896	0.644	0.605	0.00234267
Smdt1	0.000739169	0.166658	0.989	0.989	0.00235148
Dnajb11	0.000739484	0.179079	0.872	0.85	0.00235148
Rad51ap1	0.000755415	0.175371	0.739	0.633	0.00239973
Virma	0.000756049	0.170327	0.661	0.559	0.00239973
Gtpbp4	0.000760318	0.177997	0.922	0.896	0.00240895
9130401M01Rik	0.000761373	0.166899	0.771	0.691	0.00240895
Nom1	0.000761943	0.165525	0.701	0.6	0.00240895
Fzd2	0.000762436	0.216642	0.808	0.717	0.00240895
Mest	0.00076245	0.325014	0.895	0.786	0.00240895
Kcnq1ot1	0.00077469	0.261415	0.979	0.954	0.0024441
Dkk1	0.000774993	-0.317144	0.2	0.267	0.0024441
Gar1	0.000778936	0.168981	0.952	0.938	0.00245243
Sfswap	0.000779058	0.167067	0.714	0.64	0.00245243
Usp7	0.000781654	0.178195	0.859	0.83	0.00245836
Grk2	0.000782699	0.159268	0.541	0.466	0.0024594
Rpl7l1	0.000788755	0.171838	0.966	0.931	0.00247617
Obsl1	0.000810252	0.158583	0.516	0.428	0.00254135
Kti12	0.000812539	0.160051	0.701	0.605	0.0025462
Mbtps1	0.000815346	0.16649	0.754	0.691	0.00255268
Dpy19l1	0.000819986	0.160114	0.461	0.375	0.00256488
Rfc5	0.00083101	0.174377	0.891	0.806	0.002597
Ppp2r1a	0.000833777	0.170856	0.909	0.817	0.00260329
Cacng4	0.00083553	0.213455	0.343	0.232	0.0026064
Trir	0.000844581	0.170078	0.987	0.976	0.00263225
Tcf12	0.00086496	0.185637	0.806	0.793	0.00269333
Aars	0.000888732	0.161573	0.602	0.497	0.00276485
Cdk7	0.000889952	0.171628	0.758	0.744	0.00276615
Tcn2	0.000891648	-0.105553	0.324	0.38	0.00276893
Rpf1	0.000895168	0.173207	0.781	0.707	0.00277736
Phyhipl	0.000906777	-0.206039	0.137	0.229	0.00281084
Eya1	0.000912727	0.230444	0.549	0.408	0.00282675
Map2k2	0.000919782	0.167868	0.979	0.971	0.00284604
Dhx30	0.000922706	0.168392	0.766	0.669	0.00285253
Lars	0.000937506	0.180514	0.848	0.781	0.00289568
Mid1ip1	0.000942296	0.168533	0.406	0.267	0.00290787
Pnn	0.000947967	0.186462	0.992	0.985	0.00292276
Tysnd1	0.000949285	0.157552	0.642	0.499	0.0029242
Incenp	0.000951589	0.231584	0.817	0.746	0.00292679
Atp5g3	0.000951823	0.158599	0.998	0.996	0.00292679
Nkain3	0.000957499	0.166385	0.385	0.256	0.00294162
Arl6ip4	0.000961971	0.165861	0.901	0.879	0.00295273
Cdh1	0.000964003	-0.140692	0.194	0.28	0.00295633
Jund	0.000966354	0.166892	1	0.998	0.00296091
Iws1	0.000973059	0.180308	0.844	0.768	0.00297881
Nsmce2	0.000989985	0.16528	0.914	0.876	0.00302793
E2f6	0.000993218	0.151414	0.552	0.408	0.00303437
Lap3	0.00099385	0.16366	0.922	0.888	0.00303437
Rfc3	0.000996845	0.19683	0.901	0.863	0.00303865
Pspc1	0.000997017	0.17815	0.792	0.715	0.00303865
Mrpl21	0.000998126	0.165305	0.958	0.956	0.00303935
Ilf3	0.00100481	0.176786	0.876	0.815	0.00305494
Fuom	0.00100502	0.164809	0.684	0.57	0.00305494
Gapvd1	0.00100615	0.176181	0.806	0.735	0.00305568
H2afv	0.00101269	0.160812	1	1	0.00307283
Ube2j2	0.00101589	0.167095	0.878	0.834	0.00307984
Eprs	0.00102687	0.178975	0.989	0.984	0.0031104
Aadat	0.00104177	-0.288164	0.095	0.21	0.00315276
Opa3	0.00104312	0.155105	0.556	0.426	0.00315408
Psmc5	0.00104699	0.154959	0.996	0.982	0.00316138
Ccng2	0.00104737	0.166375	0.554	0.441	0.00316138
Ercc6l2	0.00105113	0.15255	0.505	0.41	0.00316996
Pgs1	0.00105409	0.152498	0.541	0.437	0.0031761
Gna11	0.00105881	0.168588	0.869	0.812	0.00318753
Steap1	0.00106073	-0.235552	0.112	0.216	0.00319051
Dazap1	0.00106397	0.170488	0.96	0.952	0.00319748
Fxn	0.00106586	0.169077	0.768	0.697	0.00320037
Orc2	0.00107159	0.16458	0.68	0.569	0.00321478
Pgd	0.0010759	0.161925	0.712	0.618	0.0032249
Csnk1g2	0.00109446	0.162569	0.947	0.918	0.00327769
Snapc5	0.00109678	0.16527	0.72	0.64	0.00328093
Snrpa	0.00109745	0.176579	0.971	0.952	0.00328093
Jpt2	0.00109855	0.156667	0.667	0.552	0.00328138
Dnajc15	0.00110075	0.183269	0.897	0.868	0.00328488
Atox1	0.00110163	0.167548	0.943	0.916	0.00328488
Tmem248	0.00111514	0.149021	0.539	0.419	0.00332227
Bop1	0.00112665	0.157696	0.615	0.53	0.00335368
Jpt1	0.00113446	0.191943	0.989	0.985	0.0033714
Nol8	0.00113456	0.172079	0.598	0.528	0.0033714
Ndufb8	0.00113807	0.165093	0.994	0.995	0.00337861
Fbl	0.00113895	0.157102	0.985	0.985	0.00337861
Eif4g1	0.00114061	0.199666	0.941	0.92	0.00338065
Gng2	0.00116004	0.173817	0.476	0.377	0.00343527
Lsm1	0.00116248	0.164448	0.859	0.777	0.00343789
Polr2j	0.00116292	0.158447	0.981	0.969	0.00343789
Pgp	0.00118305	0.202699	0.859	0.824	0.0034944
Arf1	0.00119051	0.153688	0.998	0.998	0.00351344
Ldlr	0.0012068	0.198831	0.389	0.291	0.00355846
Hnrnpll	0.00121321	0.167854	0.813	0.766	0.00357392
Igf2bp1	0.00121412	0.176411	0.838	0.77	0.00357392
Atp13a3	0.00123728	0.169166	0.695	0.618	0.00363899
Galnt18	0.00124341	-0.131474	0.211	0.28	0.0036539
Coro1c	0.00124602	0.160916	0.533	0.466	0.00365847
Sart3	0.00125085	0.1656	0.743	0.654	0.00366951
Tle1	0.00126359	0.168663	0.596	0.512	0.00370374
Mpdz	0.00126619	0.164076	0.539	0.459	0.00370822
Tmem100	0.00127112	0.311131	0.539	0.411	0.00371947
Trib2	0.00127361	0.178951	0.52	0.42	0.0037236
Dynlt1a	0.00128781	0.153241	0.493	0.362	0.00376195
Impad1	0.00128942	0.166704	0.773	0.682	0.00376238
Txnl1	0.00129014	0.160294	0.981	0.996	0.00376238
Mrpl28	0.00129214	0.158545	0.979	0.965	0.003765
Tmem256	0.00130011	0.163348	0.964	0.934	0.00378502
1810055G02Rik	0.00130344	0.15217	0.484	0.347	0.00378901
Pdxp	0.00130367	0.149887	0.543	0.446	0.00378901
Ublcp1	0.00131183	0.161301	0.718	0.594	0.00380949
Ubtf	0.00131984	0.177763	0.954	0.921	0.00382955
Smarcd2	0.00132789	0.150824	0.623	0.494	0.00384966
D030045P18Rik	0.00133304	-0.234969	0.082	0.216	0.00385876
Ash2l	0.00133327	0.167531	0.893	0.879	0.00385876
Ube2d3	0.00133821	0.161812	0.985	0.993	0.00386982
Ssu72	0.00134176	0.163401	0.907	0.892	0.00387682
Qser1	0.001354	0.169353	0.646	0.574	0.0039089
Ak6	0.00136692	0.175343	0.863	0.83	0.00394292
Fancm	0.00137483	0.160599	0.451	0.351	0.00396239
5430416N02Rik	0.0013849	0.151922	0.541	0.45	0.00398809
Trappc13	0.00138657	0.157716	0.777	0.675	0.00398959
Car12	0.00139642	0.171475	0.415	0.316	0.00401456
Hsd11b2	0.00139912	0.198108	0.429	0.309	0.00401899
Slc39a6	0.00140326	0.155468	0.629	0.534	0.00402505
Arpp19	0.00140357	0.156638	0.983	0.98	0.00402505
Ryk	0.00140787	0.167663	0.945	0.92	0.00403401
Hyou1	0.0014173	0.151729	0.505	0.358	0.00405767
Gpatch8	0.0014185	0.18081	0.891	0.87	0.00405773
Dynll2	0.00142089	0.199743	0.893	0.89	0.0040612
Eif3c	0.00142291	0.156228	0.987	0.993	0.00406242
Mrps18c	0.00142367	0.161305	0.882	0.854	0.00406242
Smox	0.00143469	0.15906	0.419	0.303	0.00409047
Pygb	0.00145162	0.160577	0.402	0.287	0.00413532
Gpx8	0.00145947	0.170236	0.726	0.607	0.00415426
Rnaset2a	0.00147177	-0.134873	0.158	0.263	0.00418581
Chaf1b	0.00148077	0.204973	0.726	0.671	0.00420791
Abca3	0.0014879	-0.128804	0.202	0.267	0.00422469
Limd2	0.00149256	0.170788	0.817	0.801	0.00423445
Eif1ax	0.00150173	0.165539	0.989	0.995	0.00425697
Cwc15	0.00150444	0.158696	0.973	0.947	0.00426114
Mum1	0.00151686	0.169678	0.773	0.731	0.00429278
Misp	0.00152198	-0.21294	0.107	0.212	0.00430375
Arfrp1	0.00152551	0.157928	0.731	0.634	0.00431019
Mesd	0.00154748	0.163914	0.848	0.801	0.00436868
Met	0.00155246	-0.103644	0.221	0.311	0.00437915
Fam107a	0.00155798	0.205094	0.322	0.219	0.00439112
Crnkl1	0.00158142	0.152922	0.642	0.537	0.00445356
Cacfd1	0.00158371	0.147952	0.507	0.408	0.00445636
Med28	0.00159173	0.167374	0.937	0.91	0.00447529
Armc1	0.00161461	0.159211	0.848	0.739	0.0045359
Trpc4ap	0.0016197	0.170815	0.695	0.6	0.0045465
Mrpl30	0.00162216	0.16031	0.966	0.951	0.0045472
Hist1h4h	0.00162259	0.19511	0.611	0.534	0.0045472
Las1l	0.00163017	0.164588	0.8	0.757	0.00456475
Xpo1	0.00164159	0.173662	0.836	0.771	0.00459075
Serf2	0.00164212	0.152224	1	1	0.00459075
Pin4	0.00165197	0.159449	0.918	0.878	0.00461455
Med19	0.00165411	0.167888	0.867	0.824	0.00461677
Ogt	0.00165842	0.183207	0.865	0.793	0.00462506
Calu	0.00167458	0.175978	0.931	0.905	0.00466635
Mfap4	0.00167688	0.246014	0.575	0.415	0.00466899
Ube2e1	0.00167955	0.160527	0.922	0.912	0.00467265
Tnpo1	0.00168889	0.169083	0.785	0.68	0.00469483
Slc3a2	0.00169285	0.188807	0.874	0.826	0.00470206
Smad5	0.00169837	0.162967	0.611	0.525	0.0047136
Psmd13	0.00171142	0.169587	0.973	0.963	0.004746
Rnf41	0.0017363	0.146236	0.453	0.335	0.00481113
Skiv2l2	0.00176071	0.160395	0.834	0.777	0.0048743
Etv5	0.00176193	0.188242	0.413	0.336	0.0048743
Rcl1	0.00176518	0.15512	0.651	0.545	0.00487936
Topbp1	0.00177301	0.180593	0.874	0.848	0.00489709
Polr3k	0.00178878	0.163019	0.909	0.854	0.00493668
Usf1	0.00179889	0.153134	0.611	0.505	0.00496061
Bysl	0.00180064	0.152332	0.512	0.448	0.00496146
Crcp	0.00182248	0.145845	0.501	0.391	0.00501763
Uba1	0.00182933	0.167122	0.88	0.863	0.00503249
Stub1	0.00184977	0.164507	0.973	0.978	0.00508464
Akt1	0.00187713	0.168121	0.874	0.83	0.00515576
Tnpo3	0.00187911	0.17262	0.874	0.81	0.00515709
Dgcr2	0.00188152	0.154953	0.636	0.559	0.00515958
Mtx1	0.00190086	0.159399	0.823	0.713	0.00520847
Tnfaip2	0.00190687	-0.114875	0.429	0.377	0.0052208
Zcchc3	0.00193827	0.159653	0.825	0.72	0.00530255
Apex1	0.00195111	0.172758	0.977	0.978	0.00533343
Hsp90b1	0.00195815	0.22155	0.996	0.998	0.0053461
Map1b	0.00195884	0.228099	0.686	0.62	0.0053461
Dcun1d5	0.00197709	0.15878	0.958	0.936	0.00539163
Uqcr10	0.00198333	0.15836	0.994	0.998	0.00540438
Ythdf1	0.00198851	0.157843	0.813	0.713	0.00540897
Tgif2	0.00198857	0.146137	0.627	0.516	0.00540897
Prrc2a	0.00198972	0.170568	0.893	0.874	0.00540897
Ctnnal1	0.00200317	0.159531	0.663	0.547	0.00543748
Exosc9	0.00200337	0.153766	0.718	0.638	0.00543748
Rars	0.00201623	0.158792	0.912	0.876	0.00546809
Exosc10	0.00203897	0.153978	0.621	0.558	0.00552541
Psmc2	0.00205285	0.159073	0.968	0.958	0.00555866
Epm2aip1	0.00205465	0.152728	0.617	0.528	0.00555916
Lamtor1	0.00207057	0.161459	0.912	0.918	0.00559785
Dhx9	0.00207968	0.1981	0.947	0.914	0.00561806
Irx1	0.00211214	-0.317273	0.069	0.192	0.0057013
Mlf2	0.0021141	0.153935	0.992	0.963	0.00570212
Sirt1	0.00212089	0.152602	0.503	0.393	0.00571595
Safb	0.00213066	0.188639	0.897	0.861	0.00573779
Plod3	0.00213625	0.148899	0.507	0.42	0.00574836
Mrpl58	0.00217155	0.165411	0.926	0.938	0.0058388
Lman2l	0.00218014	0.143603	0.488	0.34	0.00585732
Foxp1	0.00219647	0.170783	0.914	0.867	0.00589661
Trmt6	0.00219984	0.165827	0.657	0.596	0.00590106
Scaf4	0.00220386	0.154986	0.516	0.437	0.00590722
Pard6g	0.00222817	0.148878	0.621	0.534	0.00596776
Gspt1	0.00223369	0.171418	0.973	0.963	0.00597791
Mrpl12	0.00223804	0.167258	0.983	0.985	0.00598488
Pbrm1	0.00224039	0.176925	0.96	0.963	0.00598652
Mxra7	0.00224396	0.148478	0.448	0.333	0.00599142
Ltv1	0.00224999	0.159275	0.777	0.68	0.00600289
Hsd17b12	0.00225713	0.163785	0.886	0.806	0.00601727
2310011J03Rik	0.00226095	0.149837	0.712	0.6	0.0060228
Kpna4	0.00226745	0.160539	0.848	0.728	0.00603544
Ndn	0.00228867	0.158609	0.861	0.786	0.00608722
Pxdn	0.00229635	0.151035	0.587	0.501	0.00610167
Exosc1	0.00229764	0.153745	0.693	0.636	0.00610167
F2r	0.00230924	0.143078	0.623	0.497	0.00612776
Nans	0.00233327	0.163862	0.796	0.729	0.00618676
Cenpm	0.00234046	0.161316	0.88	0.837	0.00620106
Rfx7	0.00234435	0.164002	0.655	0.552	0.00620658
Bud31	0.00235115	0.157532	0.863	0.846	0.00621859
Ccar2	0.00235249	0.141134	0.537	0.428	0.00621859
Dusp12	0.00236923	0.145501	0.537	0.473	0.00625803
Nck1	0.00240219	0.156906	0.745	0.687	0.00633873
Msh6	0.00240346	0.156746	0.651	0.576	0.00633873
Bnip2	0.00240736	0.160193	0.876	0.779	0.00634416
Kif2a	0.00242569	0.166382	0.855	0.819	0.00638758
Utp3	0.00242885	0.159069	0.962	0.938	0.00639104
Smarca2	0.00246554	0.17872	0.665	0.587	0.00648263
Dhx8	0.0024729	0.153429	0.571	0.484	0.00649702
Mrps15	0.00247981	0.154917	0.949	0.916	0.00651021
Elp3	0.00249062	0.147637	0.661	0.574	0.00653361
Flywch1	0.00250506	0.154892	0.665	0.589	0.00656167
Anapc16	0.00250512	0.159926	0.8	0.74	0.00656167
Mtf2	0.00252738	0.161811	0.844	0.803	0.00661493
C1qtnf12	0.002537	0.229948	0.844	0.718	0.00663508
Pdzd2	0.00255659	0.298307	0.564	0.461	0.00667325
Kif26b	0.0025582	0.187434	0.442	0.349	0.00667325
Nup35	0.00255864	0.147663	0.539	0.466	0.00667325
Morc2a	0.00255934	0.150326	0.408	0.293	0.00667325
Psmb5	0.00256855	0.157885	0.998	0.993	0.0066922
Gins4	0.00259796	0.164822	0.827	0.801	0.00676372
Letm1	0.00261109	0.156795	0.627	0.552	0.00679277
Ppp1r14a	0.00261986	-0.119809	0.272	0.356	0.00681044
Tmem267	0.00262874	0.173537	0.324	0.19	0.0068284
Hsf2	0.00263839	0.147069	0.474	0.391	0.00684829
Ddx3x	0.00265018	0.185428	0.897	0.894	0.00687372
Mcrip1	0.00267174	0.160768	0.947	0.941	0.00692124
Amd1	0.00267252	0.150334	0.663	0.574	0.00692124
Rflnb	0.00267626	0.161224	0.484	0.404	0.00692572
Hbegf	0.00268557	-0.2248	0.124	0.141	0.00694462
Ncoa5	0.00269638	0.141134	0.509	0.402	0.00696734
Cox10	0.00270597	0.146979	0.488	0.408	0.00698688
Ubxn8	0.00271118	0.146185	0.442	0.331	0.00699508
Gtf2h1	0.00272362	0.143417	0.52	0.406	0.00702192
Mtx2	0.00273741	0.160881	0.935	0.936	0.00705222
Ube2d2a	0.00274928	0.15785	0.973	0.936	0.00707749
Umps	0.00276571	0.147156	0.796	0.706	0.00711108
Ogfr	0.00276645	0.157373	0.808	0.742	0.00711108
Ttc1	0.00277343	0.15596	0.789	0.742	0.00712372
Amotl1	0.00278811	0.163553	0.665	0.609	0.00715607
Ltbr	0.00279277	0.151035	0.425	0.338	0.00716271
Eef1d	0.00285052	0.139118	0.998	0.998	0.00730539
Arf2	0.00286752	0.142454	0.434	0.311	0.0073417
Ap3s1	0.00286895	0.154431	0.76	0.64	0.0073417
Daxx	0.00287408	0.147571	0.678	0.576	0.00734604
Tmcc1	0.00287491	0.15555	0.604	0.552	0.00734604
Zbtb20	0.00288847	0.222163	0.867	0.81	0.00737523
Cep170	0.0029245	0.151235	0.575	0.475	0.00746169
Uri1	0.00293826	0.161975	0.781	0.755	0.00748899
Fhl2	0.00293954	-0.11199	0.297	0.314	0.00748899
Ccdc124	0.00294951	0.17638	0.933	0.905	0.00750885
Abhd17a	0.00295711	0.154712	0.905	0.854	0.00752262
Srm	0.0029623	0.188875	0.893	0.892	0.00752692
St3gal5	0.00296317	0.178053	0.558	0.468	0.00752692
Nde1	0.00297126	0.187266	0.836	0.74	0.00754191
Mrpl34	0.00299548	0.149148	0.979	0.978	0.00759782
Dab2	0.00300431	-0.121834	0.392	0.459	0.00761461
Ctsh	0.00302075	-0.148996	0.192	0.252	0.00765064
Pcnt	0.0030326	0.1725	0.651	0.636	0.00767502
Dnajc25	0.00304882	0.141134	0.514	0.406	0.00770543
Tsr1	0.00304909	0.146202	0.579	0.486	0.00770543
Hnrnpk	0.0030571	0.140632	1	1	0.00772002
Kmt5c	0.00307471	0.142258	0.545	0.442	0.0077533
Cdadc1	0.00307478	0.139994	0.543	0.417	0.0077533
Zfp507	0.00308438	0.141134	0.509	0.411	0.00777182
Tedc1	0.00309274	0.149264	0.396	0.28	0.00778719
Naa50	0.00312917	0.162698	0.935	0.894	0.00786951
Cmas	0.00313	0.15487	0.819	0.718	0.00786951
Lcmt1	0.00317042	0.151415	0.762	0.673	0.00796534
Prkaca	0.00317473	0.143955	0.676	0.552	0.00797035
Ssr1	0.00319022	0.163862	0.909	0.843	0.00799889
Pou2f1	0.00319074	0.153243	0.564	0.486	0.00799889
Mphosph8	0.00320297	0.15624	0.952	0.903	0.00802373
Smarcd1	0.00321556	0.163734	0.893	0.845	0.0080494
Psmc4	0.00324293	0.155783	0.983	0.978	0.00811045
Hs3st6	0.00324465	0.209444	0.512	0.395	0.00811045
Chaf1a	0.00328478	0.176926	0.739	0.695	0.0082048
Spen	0.00328939	0.167959	0.688	0.587	0.00821038
Lrfn4	0.00330381	0.147713	0.518	0.453	0.0082276
Lrr1	0.00330403	0.141134	0.507	0.378	0.0082276
Filip1l	0.00330488	-0.117799	0.198	0.287	0.0082276
Mpv17l2	0.00330584	0.144379	0.543	0.453	0.0082276
Apopt1	0.00330965	0.150294	0.752	0.653	0.00823115
Mrpl11	0.00331658	0.152634	0.971	0.934	0.00824244
Plpp3	0.00332477	0.207906	0.619	0.512	0.00825683
Serpinb6a	0.00334207	0.161185	0.794	0.693	0.00829383
Srpk1	0.00334827	0.160339	0.943	0.907	0.00830322
Slfn9	0.00336025	-0.146548	0.133	0.238	0.00832219
Rsl24d1	0.00336074	0.160194	0.842	0.81	0.00832219
AU019823	0.00337138	0.147472	0.665	0.569	0.00834252
H2afx	0.00337834	0.206737	0.983	0.952	0.00835375
Etf1	0.003402	0.164124	0.912	0.852	0.00840623
Skp1a	0.00340692	0.158234	0.968	0.945	0.00841235
Ccnt1	0.00341461	0.157373	0.794	0.746	0.00842531
Sox11	0.00344347	0.218319	0.977	0.951	0.00849045
Rnf220	0.0034619	0.153798	0.669	0.629	0.00852979
Srp19	0.00346906	0.163615	0.947	0.925	0.00854133
Usp10	0.00347992	0.164346	0.796	0.762	0.00856194
Robo2	0.0034825	0.256312	0.615	0.53	0.00856218
Mdk	0.00348655	0.209506	0.998	0.995	0.00856602
Mal	0.00349117	-0.370959	0.065	0.13	0.00857126
Mrps21	0.00349399	0.151769	0.971	0.962	0.00857208
Hells	0.00350615	0.208273	0.836	0.803	0.0085958
Cct4	0.00351272	0.147166	0.994	0.995	0.00859994
Paxbp1	0.00351283	0.152695	0.726	0.634	0.00859994
Dyrk1a	0.00352093	0.139983	0.514	0.406	0.00861365
Sympk	0.00355058	0.149605	0.611	0.541	0.00867848
Pfn1	0.00355361	0.15305	1	0.998	0.00867848
Zfp932	0.00355498	0.145038	0.402	0.313	0.00867848
Emc10	0.00356997	0.161589	0.937	0.903	0.00870891
Farsb	0.00357632	0.155981	0.798	0.695	0.0087123
Ptp4a2	0.00357697	0.164984	0.958	0.938	0.0087123
Sec24c	0.00357894	0.141134	0.501	0.4	0.0087123
Smurf2	0.00358808	0.137676	0.524	0.406	0.00872455
Max	0.00358904	0.144718	0.672	0.58	0.00872455
Rtca	0.00360425	0.154535	0.665	0.64	0.00875536
Rbm17	0.00361417	0.154809	0.945	0.92	0.00877327
Ttll12	0.00362483	0.150091	0.415	0.325	0.00879296
Hist1h3e	0.00364276	0.1613	0.579	0.49	0.00882562
Eif2b3	0.00364342	0.157927	0.68	0.605	0.00882562
Srsf11	0.00365953	0.147763	0.987	0.989	0.00885842
Exo1	0.00370492	0.156389	0.68	0.6	0.00896201
Cks1b	0.00372291	0.159449	0.992	0.995	0.00899921
2410002F23Rik	0.0037404	0.151318	0.72	0.687	0.00903515
Gmps	0.00377326	0.1634	0.92	0.941	0.00910815
Nucb1	0.00381351	0.151836	0.829	0.757	0.00919887
Strip1	0.0038283	0.143766	0.413	0.302	0.00922808
Homer3	0.00384098	0.142154	0.596	0.495	0.00925217
Hmgn3	0.00385565	0.171887	0.789	0.676	0.00928101
Lpin2	0.00385969	0.184514	0.811	0.722	0.00928425
Ctdp1	0.00388577	0.149842	0.366	0.216	0.00934049
Fbxo22	0.00390286	0.156829	0.815	0.762	0.00936479
Dchs1	0.00390398	0.148209	0.463	0.358	0.00936479
Usp47	0.00390403	0.160608	0.752	0.702	0.00936479
Hdac2	0.00390959	0.153039	0.968	0.952	0.00937159
Zfp706	0.00395872	0.151623	0.979	0.976	0.00948277
Mrpl49	0.00396969	0.154129	0.825	0.786	0.00950245
Ppp4r2	0.00397628	0.160809	0.933	0.888	0.00951162
Cdc123	0.00398407	0.155863	0.918	0.898	0.00952364
Kctd20	0.00399474	0.136847	0.577	0.464	0.00954253
Sf3a3	0.00399936	0.154324	0.941	0.914	0.00954695
Cdyl	0.00401731	0.144492	0.499	0.415	0.00958317
Rbbp4	0.00405271	0.153255	0.987	0.985	0.00966091
Pitrm1	0.00407891	0.162057	0.68	0.644	0.00971666
Tubb2b	0.00410051	0.237641	0.857	0.782	0.00976137
Mapk12	0.00412379	0.153625	0.356	0.23	0.00981002
Eid1	0.00412748	0.161186	0.966	0.947	0.00981203
Ilkap	0.00415762	0.15645	0.865	0.821	0.00987685
Ndufaf4	0.00416185	0.164869	0.699	0.622	0.0098801
Git2	0.00416881	0.160839	0.674	0.634	0.00988982
Cdc5l	0.00419167	0.159757	0.901	0.903	0.00993719
Cggbp1	0.00422389	0.157018	0.933	0.885	0.0100042
Atg101	0.00422572	0.150767	0.779	0.7	0.0100042
Magohb	0.00423356	0.151597	0.752	0.691	0.0100158
Dync2h1	0.00430428	0.15139	0.659	0.528	0.0101762
Vps36	0.00431899	0.174582	0.882	0.828	0.010204
Tgfbi	0.00433109	0.253367	0.526	0.4	0.0102255
Creb3l2	0.00433444	0.172697	0.817	0.755	0.0102264
Ctcf	0.004338	0.153173	0.975	0.956	0.0102278
Paxip1	0.00434234	0.138856	0.482	0.413	0.0102291
Gmppb	0.00434448	0.139814	0.415	0.303	0.0102291
Sdf2l1	0.00434846	0.16441	0.678	0.592	0.0102315
Wdr43	0.00436996	0.174562	0.956	0.932	0.0102751
Thoc1	0.00443081	0.144784	0.648	0.581	0.010411
Hmcn1	0.00444299	0.192935	0.554	0.472	0.0104326
Spcs2	0.00444688	0.151209	0.992	0.985	0.0104346
Ola1	0.00449526	0.15137	0.962	0.929	0.0105409
Api5	0.00450268	0.152862	0.8	0.739	0.0105511
Rpf2	0.00452886	0.158915	0.794	0.751	0.0106053
Lca5	0.00454114	0.161221	0.341	0.218	0.0106231
Tsc22d1	0.00454262	0.199124	0.994	0.98	0.0106231
Bcat2	0.00460429	0.161953	0.712	0.651	0.01076
Psmc3ip	0.00460843	0.158228	0.806	0.702	0.0107624
Diexf	0.00463492	0.142456	0.389	0.298	0.0108169
Prpf38b	0.0046392	0.172437	0.939	0.914	0.0108196
Fam96b	0.00465129	0.158947	0.884	0.872	0.0108404
Ahdc1	0.00465709	0.143532	0.463	0.355	0.0108466
Mtdh	0.00466289	0.147799	0.989	0.987	0.010852
Ywhag	0.00466838	0.163917	0.768	0.724	0.010852
Msl3l2	0.00466886	0.143773	0.417	0.282	0.010852
Supt4a	0.00467683	0.151132	0.956	0.936	0.0108632
Sapcd2	0.00468504	0.17891	0.537	0.399	0.010875
Dnmt1	0.00470672	0.195569	0.876	0.824	0.0109112
Gxylt1	0.00470697	0.138899	0.541	0.397	0.0109112
Mylk	0.00475296	0.215242	0.579	0.49	0.0110021
Slc39a5	0.00475544	-0.285385	0.088	0.177	0.0110021
Lpcat1	0.00475576	0.131885	0.505	0.395	0.0110021
Dctpp1	0.00476452	0.148056	0.989	0.971	0.0110056
Prpf40a	0.00476797	0.162718	0.981	0.976	0.0110056
Tmem60	0.0047681	0.147762	0.726	0.627	0.0110056
Clspn	0.00477005	0.171778	0.794	0.735	0.0110056
Rabl6	0.00477803	0.152082	0.853	0.815	0.0110138
Manbal	0.00478	0.148656	0.705	0.618	0.0110138
Bbx	0.00478368	0.186009	0.863	0.812	0.0110149
Tmem183a	0.00478998	0.149758	0.741	0.684	0.0110221
Ak2	0.00479385	0.148751	0.979	0.952	0.0110236
Gas2l3	0.00481583	0.16627	0.373	0.291	0.0110668
Vdac1	0.00483895	0.151128	0.998	0.998	0.0111125
Bod1	0.00484306	0.153072	0.92	0.887	0.0111145
Mrpl18	0.00487726	0.146525	0.981	0.976	0.0111856
Nat8f1	0.00490248	-0.133235	0.206	0.243	0.0112359
Fosl2	0.00491892	-0.148342	0.141	0.223	0.0112661
Tnfaip1	0.00496251	0.154696	0.817	0.744	0.0113584
Psmd12	0.00498058	0.150003	0.979	0.98	0.0113922
Dgcr8	0.00499561	0.144537	0.493	0.397	0.011419
Zyg11b	0.00501156	0.143634	0.417	0.325	0.0114479
Sdc1	0.0050195	0.151924	0.6	0.499	0.0114584
Rpa1	0.00502488	0.136383	0.608	0.508	0.0114631
Crk	0.005038	0.144448	0.707	0.611	0.0114854
Pitpnb	0.0050488	0.155392	0.813	0.764	0.0115025
Ppih	0.00505876	0.153386	0.918	0.856	0.0115175
Clock	0.00506434	0.146102	0.581	0.495	0.0115226
Amn	0.00507752	-0.267999	0.097	0.19	0.011545
Map1s	0.00508701	0.15013	0.558	0.49	0.011559
Sema3f	0.00511055	0.139951	0.469	0.356	0.0116048
Heatr6	0.00511592	0.141134	0.644	0.525	0.0116093
Avl9	0.00513105	0.141134	0.545	0.442	0.011636
Top2b	0.00514182	0.161459	0.931	0.912	0.0116448
Numa1	0.00514244	0.170911	0.789	0.724	0.0116448
Akap11	0.00514508	0.145367	0.562	0.45	0.0116448
Mgea5	0.00517626	0.151791	0.661	0.58	0.0116948
Pum3	0.00517631	0.160319	0.825	0.786	0.0116948
Ift27	0.00517731	0.150196	0.783	0.733	0.0116948
Prpsap1	0.00519631	0.15135	0.869	0.826	0.01173
Smad1	0.00520245	0.137931	0.552	0.439	0.0117362
Rpp30	0.00520825	0.147131	0.754	0.729	0.0117416
Msmo1	0.00525096	0.202361	0.579	0.483	0.0118301
Fam118b	0.00525813	0.147814	0.4	0.269	0.0118385
Mcm10	0.00532461	0.132333	0.522	0.402	0.0119804
Plxdc2	0.00537008	0.162988	0.541	0.464	0.0120748
Krt10	0.00538287	0.137951	0.564	0.464	0.0120957
Fam53a	0.00540497	0.143035	0.64	0.559	0.0121315
Ptbp2	0.00540587	0.151909	0.709	0.647	0.0121315
Spc24	0.00546512	0.169349	0.971	0.921	0.0122565
Chchd7	0.00552715	0.155648	0.827	0.803	0.0123876
Mga	0.005538	0.161403	0.796	0.691	0.0124038
Aldh6a1	0.00555885	-0.116695	0.183	0.258	0.0124424
Ap1s1	0.00559075	0.152138	0.901	0.857	0.0125057
Pax8	0.00560133	0.226803	0.832	0.859	0.0125213
Nsg1	0.00561127	0.144988	0.554	0.47	0.0125311
Dgkz	0.00561298	0.138499	0.4	0.305	0.0125311
Nol11	0.00564786	0.156972	0.842	0.731	0.0126008
Pnp	0.0056676	0.17404	0.867	0.81	0.0126366
Cntrl	0.00567829	0.174156	0.663	0.592	0.0126523
Rsl1d1	0.00572144	0.157683	0.985	0.978	0.0127402
Tomm34	0.00575121	0.13572	0.568	0.461	0.0127982
Cct5	0.00578388	0.134802	0.992	1	0.0128626
Gatad2b	0.0057969	0.156133	0.787	0.753	0.0128832
Prss12	0.00581955	-0.24274	0.069	0.174	0.0129253
Phc1	0.00586771	0.135655	0.537	0.459	0.0130238
Sh3bgr	0.00592571	0.200223	0.259	0.143	0.0131441
1810022K09Rik	0.00593355	0.150642	0.964	0.949	0.0131519
Hist1h3f	0.00593862	0.157285	0.368	0.247	0.0131519
Plcb4	0.00594068	0.15864	0.457	0.426	0.0131519
Vars	0.00596926	0.156519	0.903	0.852	0.013205
Ccdc189	0.00597233	-0.104366	0.181	0.26	0.013205
Nup85	0.00599659	0.143654	0.691	0.616	0.0132502
Dbr1	0.00601945	0.13472	0.438	0.344	0.0132921
Cdh11	0.00604438	0.229091	0.659	0.534	0.0133387
Nmd3	0.00608953	0.147858	0.76	0.718	0.0134297
Nob1	0.00611054	0.145676	0.745	0.686	0.0134674
E2f8	0.00611835	0.145449	0.526	0.399	0.013476
Lsm2	0.00614008	0.155368	0.983	0.965	0.0135152
Dot1l	0.00614467	0.143124	0.581	0.527	0.0135167
Gramd1b	0.00615697	-0.129952	0.152	0.238	0.0135314
Bin1	0.00615919	0.149166	0.733	0.64	0.0135314
Ppp1r8	0.00622635	0.136954	0.566	0.512	0.0136702
Sfrp2	0.00623087	0.266424	0.773	0.748	0.0136714
Rsrc2	0.00625872	0.148549	0.989	0.984	0.0137238
Zmynd11	0.00633125	0.15346	0.798	0.744	0.013874
Ckap5	0.00637494	0.190027	0.891	0.83	0.0139609
Hacd2	0.00640133	0.142848	0.697	0.58	0.0140078
Dkc1	0.00640449	0.161791	0.964	0.951	0.0140078
Tulp4	0.00641629	0.145484	0.659	0.616	0.0140247
Slc35a4	0.00651297	0.14202	0.682	0.594	0.014227
Bub3	0.00653589	0.183386	0.937	0.894	0.014268
Prpf4	0.00656686	0.146	0.714	0.629	0.0143266
Fut8	0.00657511	0.149676	0.394	0.324	0.0143355
Brd1	0.00659686	0.160266	0.888	0.857	0.0143738
Hoxc10	0.00664467	0.202391	0.882	0.863	0.0144688
Yipf5	0.00665424	0.150184	0.771	0.728	0.0144805
Nedd4	0.00668537	0.152507	0.998	1	0.0145324
Psmd4	0.00668953	0.143986	0.979	0.973	0.0145324
Rab14	0.00669072	0.148737	0.983	0.974	0.0145324
Csnk1g3	0.0067305	0.149573	0.787	0.742	0.0146096
Akirin2	0.00678854	0.154968	0.933	0.901	0.0147263
Rbfa	0.00681194	0.142005	0.657	0.605	0.0147678
Myef2	0.00681859	0.185782	0.859	0.817	0.0147729
Zfr	0.00683877	0.163495	0.775	0.761	0.0148052
Hnrnpd	0.00684208	0.168125	0.998	1	0.0148052
2022-09-06	0.00687336	0.144267	0.533	0.455	0.0148635
Terf2ip	0.00690545	0.13471	0.56	0.463	0.0149236
Eml4	0.00693397	0.169689	0.785	0.702	0.0149758
Lancl2	0.00695096	0.137205	0.406	0.283	0.0149939
Ints6	0.00695106	0.144012	0.619	0.497	0.0149939
Txnip	0.00698259	0.162336	0.52	0.424	0.0150525
Nckap1	0.00700927	0.149921	0.815	0.724	0.0151006
Serp2	0.00703188	0.161569	0.396	0.283	0.0151398
Dhfr	0.00703873	0.181034	0.84	0.792	0.0151451
Hmg20b	0.00708557	0.156082	0.926	0.87	0.0152364
Psma5	0.00711058	0.140704	0.989	0.976	0.0152807
Sulf2	0.00713818	0.20181	0.583	0.483	0.0153304
Slc43a3	0.0071462	0.13467	0.4	0.302	0.0153381
Fhl1	0.0071698	-0.10652	0.251	0.318	0.0153791
Mpp6	0.00717739	0.161055	0.968	0.951	0.0153859
Eno1	0.00718857	0.146535	1	0.996	0.0154002
Stag1	0.00722101	0.160714	0.861	0.848	0.0154592
Huwe1	0.00722506	0.163626	0.939	0.898	0.0154592
Echs1	0.00728219	0.143869	0.922	0.909	0.0155649
Slc7a6os	0.00728347	0.12986	0.531	0.42	0.0155649
Rap1a	0.00729289	0.148426	0.874	0.867	0.0155753
Aebp1	0.00731884	0.16101	0.4	0.263	0.0156211
Peg3	0.00733277	0.256111	0.829	0.753	0.0156411
Ap3s2	0.00735993	0.138368	0.659	0.563	0.0156893
Emsy	0.00737857	0.158894	0.758	0.691	0.0157172
Rad51	0.00738213	0.166899	0.733	0.636	0.0157172
Mphosph10	0.00741749	0.163436	0.838	0.81	0.0157734
Phlda1	0.00741764	0.189406	0.499	0.393	0.0157734
Cdca4	0.00743536	0.138457	0.676	0.6	0.0158013
Sf3b3	0.00748935	0.153808	0.956	0.94	0.0159062
Shisa4	0.00750399	0.134809	0.421	0.298	0.0159275
Fam60a	0.00751553	0.17698	0.926	0.896	0.0159422
Cped1	0.00752559	0.194091	0.568	0.479	0.0159537
Eps15	0.00756314	0.13857	0.419	0.327	0.0160234
Ubn1	0.00757969	0.15012	0.897	0.857	0.016048
Brd4	0.00758403	0.154067	0.903	0.857	0.016048
Cyc1	0.00762259	0.149675	0.983	0.967	0.0161197
Cdc42	0.00763114	0.146643	0.996	0.989	0.0161279
Hnrnph1	0.00764064	0.174815	0.973	0.965	0.016138
Klf4	0.00764689	-0.10708	0.24	0.28	0.0161404
Ptprd	0.00765192	0.204409	0.667	0.552	0.0161404
Dlk1	0.00765579	0.350748	0.286	0.13	0.0161404
Gopc	0.0077417	0.138573	0.408	0.322	0.0163115
Srprb	0.00774904	0.138398	0.669	0.6	0.016317
Aen	0.00777322	0.140237	0.655	0.554	0.0163579
Esf1	0.00785659	0.158168	0.962	0.952	0.0165233
Ifitm1	0.00788514	0.19308	0.396	0.305	0.0165732
Hmgcs1	0.00794229	0.166575	0.779	0.695	0.0166826
Ephx2	0.00794686	-0.18964	0.084	0.194	0.0166826
Col13a1	0.0079611	0.147586	0.459	0.351	0.0167023
Snrpb2	0.00796766	0.149733	0.947	0.932	0.0167059
Dgcr6	0.00801389	0.146694	0.899	0.857	0.0167926
Trmt1	0.0081111	0.144831	0.758	0.665	0.016986
Gmfb	0.00815517	0.127313	0.636	0.488	0.0170679
Tcof1	0.00817327	0.162562	0.893	0.859	0.0170954
Tmeff1	0.00822619	0.143408	0.741	0.665	0.0171957
L3mbtl2	0.00824557	0.143916	0.364	0.25	0.0172258
Tamm41	0.00827383	0.129597	0.604	0.486	0.0172743
Zfp219	0.00828221	0.143227	0.785	0.72	0.0172813
Srbd1	0.00830932	0.140141	0.606	0.514	0.0173274
Dclk1	0.00833372	0.160742	0.543	0.419	0.0173678
Ktn1	0.00835503	0.17092	0.981	0.982	0.0174017
Zyx	0.00838567	0.156566	0.705	0.629	0.017455
Papd4	0.00841366	0.127932	0.562	0.464	0.0175027
Tuba1c	0.00842432	-0.105845	0.543	0.563	0.0175142
Nup93	0.00850116	0.135381	0.64	0.537	0.0176633
Elovl7	0.00851967	-0.14565	0.135	0.207	0.0176911
Cdc37	0.00853869	0.136745	0.992	0.998	0.0177019
Fnta	0.00853871	0.150878	0.825	0.834	0.0177019
Tubg1	0.00854026	0.148298	0.846	0.775	0.0177019
Zc3h15	0.00857578	0.142302	0.992	0.996	0.0177649
Tmem121	0.00859771	0.143848	0.366	0.252	0.01779
Drg2	0.00859826	0.141134	0.781	0.698	0.01779
Spag5	0.00876911	0.150494	0.533	0.45	0.0181327
Ybx1	0.00878193	0.155076	1	1	0.018141
Sos1	0.00878368	0.131821	0.476	0.408	0.018141
Cnot2	0.00882431	0.140394	0.775	0.698	0.018214
Brwd1	0.00889051	0.143799	0.634	0.581	0.0183331
Ppp2r2a	0.00889263	0.161432	0.893	0.867	0.0183331
Chmp4b	0.00890235	0.151764	0.874	0.863	0.0183421
Trim2	0.00890884	0.153577	0.638	0.559	0.0183446
Ywhaz	0.00893622	0.159126	0.979	0.987	0.0183899
Cdc25a	0.00895613	0.152385	0.644	0.57	0.0184126
Klhdc10	0.00895789	0.140253	0.663	0.592	0.0184126
B3gat2	0.00896708	-0.212744	0.078	0.179	0.0184205
Ddx23	0.00907336	0.145446	0.674	0.596	0.0186277
Selenof	0.00909057	0.143782	0.992	0.991	0.0186519
Crlf3	0.0091217	0.132459	0.669	0.539	0.0187046
Zhx1	0.00913241	0.132603	0.465	0.329	0.0187112
Zeb1	0.00913573	0.185372	0.465	0.395	0.0187112
Preb	0.00920083	0.137399	0.613	0.545	0.0188314
Ttc27	0.00920537	0.127289	0.446	0.342	0.0188314
Zmym5	0.00926474	0.147316	0.735	0.66	0.0189416
Ung	0.00935176	0.213799	0.587	0.541	0.0191082
Tars	0.00937698	0.141927	0.752	0.644	0.0191484
Arhgap27os2	0.00939852	-0.101745	0.166	0.258	0.019181
Ube2g2	0.00944567	0.127419	0.52	0.424	0.0192658
Kif23	0.00949296	0.189107	0.768	0.748	0.0193358
Hist1h4c	0.00949688	0.162219	0.295	0.159	0.0193358
Cpsf4	0.00949714	0.126171	0.469	0.358	0.0193358
Dnajc7	0.0095024	0.149127	0.964	0.951	0.0193358
Fam3c	0.0095345	0.142809	0.716	0.634	0.0193807
Phrf1	0.00953575	0.146284	0.661	0.612	0.0193807
Prmt5	0.00956281	0.155228	0.806	0.737	0.0194182
Eif2s1	0.00956547	0.151356	0.973	0.969	0.0194182
Oaz2	0.00969238	0.141134	0.743	0.665	0.0196534
Tmem201	0.00969269	0.130098	0.451	0.358	0.0196534
Mta2	0.00970607	0.139513	0.718	0.654	0.0196689
Polr1a	0.00975037	0.136282	0.589	0.517	0.0197471
Nedd8	0.00980121	0.139595	0.996	1	0.0198384
Elp5	0.00984766	0.141134	0.758	0.676	0.0199207
Cat	0.00988129	0.137027	0.562	0.486	0.019977
Rrp1	0.00989939	0.14392	0.975	0.98	0.0200019
Polr2h	0.00993616	0.141631	0.895	0.848	0.0200644
Kat5	0.0099511	0.129026	0.545	0.457	0.0200828
Tpm2	0.0099647	0.216026	0.804	0.695	0.020097
Coq2	0.0099698	0.142576	0.796	0.737	0.020097
Ngfr	0.00998654	0.198731	0.288	0.168	0.0201119
Pno1	0.00998886	0.143586	0.707	0.634	0.0201119
Asb13	0.00999991	0.134436	0.392	0.305	0.0201224
Psmc3	0.0100237	0.154459	0.989	0.987	0.0201548
Ss18l2	0.0100295	0.13655	0.762	0.644	0.0201548
Odc1	0.0100335	0.161203	0.971	0.962	0.0201548
Pdia5	0.0100708	0.128849	0.44	0.386	0.0202178
Tardbp	0.0101087	0.155198	0.962	0.921	0.0202822
Eif3m	0.0101191	0.142443	0.998	0.996	0.0202911
Prnp	0.010183	-0.161575	0.427	0.466	0.0204075
Ppwd1	0.0102147	0.151	0.779	0.693	0.0204591
Lrrc47	0.0102461	0.132429	0.535	0.448	0.0205101
Angel2	0.0103208	0.146777	0.701	0.653	0.0206475
Cand1	0.0103548	0.151383	0.756	0.693	0.0207036
Aldob	0.0103809	-0.211885	0.139	0.243	0.0207437
Ifngr1	0.0104192	0.13326	0.404	0.32	0.0208057
Crtc3	0.010424	0.13715	0.556	0.519	0.0208057
Exosc8	0.0104659	0.142677	0.958	0.921	0.0208692
Ahctf1	0.0104706	0.144216	0.724	0.644	0.0208692
Asf1b	0.010474	0.132704	0.554	0.479	0.0208692
Ammecr1	0.0105244	0.13197	0.484	0.391	0.0209575
Fam19a5	0.0105614	0.141134	0.524	0.439	0.0210192
Tmem189	0.0105872	0.138553	0.415	0.305	0.0210584
Rnf114	0.010608	0.130723	0.484	0.404	0.0210875
Ppif	0.0106257	0.141134	0.571	0.508	0.0211089
Rabif	0.010631	0.124812	0.461	0.364	0.0211089
Gen1	0.0106573	0.130098	0.442	0.331	0.0211414
Rai14	0.0106596	0.207274	0.752	0.647	0.0211414
Ipo9	0.0106944	0.135553	0.625	0.558	0.0211981
H3f3b	0.0107844	0.147611	1	1	0.0213642
Nuf2	0.0108106	0.143701	0.655	0.576	0.0214038
Ncbp3	0.0108572	0.131416	0.629	0.528	0.0214838
Glrx3	0.0109187	0.133341	0.992	0.993	0.021593
Ddx3y	0.0109595	0.149142	0.499	0.41	0.0216614
Trim16	0.010991	0.177344	0.267	0.161	0.0217112
Usp1	0.0110543	0.165902	0.952	0.925	0.0218236
Wt1	0.0111368	0.196003	0.844	0.697	0.0219739
Krtcap2	0.011152	0.142517	0.981	0.976	0.0219913
Anpep	0.0111634	-0.184894	0.122	0.181	0.0220013
Myo5a	0.0111711	0.133991	0.469	0.367	0.022004
Sparcl1	0.0112112	0.219999	0.282	0.183	0.0220702
Hnrnpr	0.0112356	0.148916	0.987	0.989	0.0221057
Nup205	0.0112479	0.129986	0.522	0.448	0.0221173
Cdc7	0.0113106	0.131151	0.512	0.455	0.0222278
2810001G20Rik	0.011329	0.13255	0.623	0.547	0.0222395
Rab3a	0.0113294	0.135932	0.392	0.3	0.0222395
Haus3	0.0114536	0.13622	0.604	0.51	0.0224704
Dnajc8	0.0115521	0.142576	0.989	0.973	0.02264
Hnrnpa2b1	0.0115532	0.179015	1	1	0.02264
Gpc6	0.0116606	0.170714	0.813	0.766	0.0228375
Cyp4a31	0.0117429	-0.287728	0.042	0.154	0.0229856
Gps1	0.0117697	0.149664	0.903	0.896	0.0230251
Strn4	0.0118072	0.136765	0.667	0.601	0.0230788
Tapbp	0.0118106	-0.108622	0.171	0.239	0.0230788
Ttyh3	0.0119	0.137464	0.648	0.545	0.0232403
Gins1	0.0119382	0.134002	0.56	0.479	0.0233017
Tsfm	0.0119546	0.148074	0.827	0.837	0.0233206
C1ql1	0.0119742	0.128584	0.402	0.335	0.0233456
Zfp213	0.0120709	0.1355	0.358	0.26	0.0235137
Mfap1a	0.012074	0.126856	0.545	0.453	0.0235137
Fggy	0.0121098	-0.102794	0.206	0.271	0.0235645
Nup88	0.0121138	0.138706	0.718	0.634	0.0235645
Ppp3ca	0.0121233	0.157386	0.834	0.746	0.0235697
Ndc80	0.0121887	0.159127	0.676	0.609	0.0236835
Stard3	0.0122122	0.12427	0.539	0.468	0.0237157
Cacnb3	0.0122245	0.127267	0.549	0.442	0.0237263
D16Ertd472e	0.0122368	0.137285	0.402	0.307	0.0237367
Mindy3	0.0122663	0.125949	0.56	0.453	0.0237806
Map2k4	0.0123171	0.126745	0.522	0.442	0.0238658
Psma3	0.012326	0.144857	0.994	1	0.0238695
Ccnl2	0.0123442	0.145147	0.878	0.806	0.0238914
Pip5k1a	0.0123796	0.1335	0.617	0.534	0.0239372
Spata5	0.0123818	0.126446	0.465	0.384	0.0239372
Ano1	0.0123957	0.16809	0.322	0.21	0.0239507
Tmem184c	0.0124602	0.126386	0.531	0.419	0.0240612
Sft2d3	0.0124669	0.126848	0.474	0.371	0.0240612
Wdr26	0.0124948	0.148121	0.859	0.828	0.0240935
Sox12	0.0124976	0.150243	0.771	0.715	0.0240935
Tmem108	0.0125177	0.163847	0.299	0.208	0.0241188
Gpn1	0.0125531	0.135607	0.771	0.66	0.0241735
2410004B18Rik	0.0126012	0.132745	0.72	0.636	0.0242525
Zfp606	0.0126145	0.132874	0.461	0.399	0.0242646
Tmem147	0.0126455	0.145164	0.92	0.901	0.0243106
Taf1	0.0126574	0.151673	0.707	0.64	0.02432
1110008P14Rik	0.0127274	0.133055	0.474	0.38	0.0244408
Pon2	0.0128181	0.129919	0.417	0.331	0.0246014
Eif3d	0.0128449	0.145253	0.983	0.973	0.024639
Nsd2	0.0128983	0.157204	0.903	0.848	0.0247159
Ehmt1	0.0128993	0.149695	0.863	0.848	0.0247159
Snd1	0.0129616	0.140382	0.754	0.713	0.0248042
Mettl2	0.0129645	0.127133	0.537	0.464	0.0248042
Trip13	0.012967	0.14193	0.716	0.64	0.0248042
Vamp3	0.0129892	0.142548	0.764	0.74	0.0248329
Ndufa4	0.0130132	0.139175	0.998	1	0.024865
Ppp2r5e	0.0130251	0.141134	0.714	0.62	0.0248741
Mrto4	0.0130854	0.150725	0.941	0.929	0.0249753
Brms1	0.0131007	0.131936	0.579	0.495	0.0249907
Paf1	0.0131228	0.136498	0.6	0.569	0.025019
Ubap1	0.0132542	0.124308	0.52	0.453	0.0252555
Cbx2	0.0132737	0.133048	0.387	0.282	0.0252787
Amph	0.0134121	0.154093	0.324	0.192	0.0255282
Rxrb	0.013436	0.134237	0.707	0.612	0.0255595
Hoxa9	0.013453	0.181354	0.899	0.792	0.0255778
Rilpl1	0.013502	0.127557	0.56	0.452	0.0256568
Fut9	0.0135224	-0.184199	0.116	0.21	0.0256814
Kras	0.0135435	0.173978	0.901	0.879	0.0257073
Srpr	0.013589	0.147586	0.811	0.739	0.0257697
Frem1	0.0135913	0.160208	0.293	0.183	0.0257697
Phf6	0.0136301	0.139503	0.68	0.675	0.025829
Cul5	0.0136476	0.141759	0.834	0.768	0.0258479
Snf8	0.0136607	0.146806	0.884	0.85	0.0258586
Slc25a5	0.0137244	0.158962	0.992	0.995	0.0259648
Taf11	0.0137694	0.136619	0.853	0.753	0.0260357
Fam105a	0.0138658	0.141134	0.396	0.285	0.0262035
Fcf1	0.0139403	0.141728	0.844	0.839	0.02633
Unc5c	0.0139534	0.161564	0.648	0.506	0.026335
Alkbh1	0.0139582	0.147278	0.844	0.788	0.026335
Zfp281	0.0140299	0.125783	0.541	0.437	0.0264557
Ranbp2	0.0140462	0.165757	0.728	0.729	0.026472
Efnb1	0.0141102	0.16929	0.773	0.695	0.0265781
Ubap2l	0.0141475	0.143957	0.962	0.947	0.0266188
Tcea3	0.0141531	-0.214825	0.101	0.155	0.0266188
Gldc	0.014155	0.139677	0.326	0.221	0.0266188
Secisbp2l	0.0142017	0.122852	0.455	0.367	0.026692
mt-Nd4l	0.0142529	0.131079	0.992	0.995	0.0267612
Sh3bp5	0.014254	0.142341	0.438	0.333	0.0267612
Tubb6	0.014283	0.154427	0.408	0.267	0.026801
Tspan6	0.014336	0.141134	0.853	0.766	0.0268859
Samd4b	0.0143957	0.13775	0.644	0.611	0.0269832
Lsm5	0.0144202	0.146798	0.941	0.932	0.0270143
Nrbp1	0.0144964	0.13916	0.787	0.777	0.0271424
Smg6	0.0145491	0.136979	0.676	0.612	0.0272262
Nolc1	0.0146083	0.164882	0.899	0.868	0.0273115
Rabggtb	0.0146105	0.135366	0.775	0.695	0.0273115
Cops6	0.0147485	0.141697	0.981	0.96	0.0275544
Rem1	0.0148991	0.161221	0.604	0.477	0.0278209
Ntf3	0.0149081	0.1212	0.453	0.358	0.0278226
Sncaip	0.0149597	0.171074	0.632	0.517	0.0279037
Tomm5	0.0150261	0.152905	0.975	0.956	0.0280123
Sucla2	0.0150551	0.142257	0.842	0.808	0.0280514
Guk1	0.0150987	0.144296	0.907	0.888	0.0281152
Cul7	0.0151057	0.146601	0.461	0.437	0.0281152
Tpst2	0.0151291	0.133659	0.528	0.45	0.0281435
Ezh2	0.0151736	0.148948	0.979	0.98	0.0282112
Ripk3	0.0152085	0.147158	0.312	0.176	0.0282608
Fdft1	0.0152205	0.131334	0.642	0.536	0.0282678
Tet3	0.0153212	0.152184	0.712	0.662	0.0284396
Gm42047	0.0153482	-0.128973	0.12	0.201	0.0284743
Pgrmc1	0.0154214	0.141557	0.973	0.914	0.0285732
Acly	0.0154216	0.137107	0.712	0.623	0.0285732
Mafg	0.0154264	0.143108	0.804	0.729	0.0285732
Ninl	0.015445	0.125074	0.463	0.351	0.0285859
Chtop	0.0154498	0.141134	0.901	0.856	0.0285859
Tstd2	0.0154609	0.12841	0.495	0.404	0.028591
Arhgap21	0.0154721	0.127444	0.436	0.331	0.0285964
Ppp1r1a	0.0155047	0.155166	0.434	0.36	0.0286352
Hnrnpa1	0.0155097	0.133991	1	1	0.0286352
Nol10	0.0155261	0.132742	0.362	0.258	0.0286501
Tipin	0.0156498	0.163454	0.905	0.887	0.0288629
Ccdc174	0.0157673	0.136422	0.806	0.717	0.0290642
Sox4	0.0158253	0.167802	0.973	0.962	0.0291554
Cox5a	0.0158561	0.152623	1	1	0.02919
Larp1	0.015861	0.162332	0.806	0.814	0.02919
Pibf1	0.0159424	0.129248	0.541	0.457	0.029318
Qrich1	0.0159484	0.133693	0.709	0.645	0.029318
Zfp131	0.0159561	0.134439	0.722	0.596	0.029318
Smg9	0.01601	0.131591	0.366	0.274	0.0294015
Mdh2	0.0160448	0.133952	0.998	0.993	0.0294489
Ddx24	0.0160529	0.143884	0.943	0.954	0.0294489
Ccser1	0.0161479	-0.12853	0.109	0.219	0.0296073
Klhdc2	0.0161697	0.140514	0.971	0.958	0.0296316
Hspbp1	0.0162217	0.133931	0.699	0.622	0.0297013
Yme1l1	0.016225	0.139207	0.829	0.795	0.0297013
Smarcb1	0.0162704	0.147585	0.971	0.949	0.0297687
Clip3	0.0162909	0.145211	0.518	0.446	0.0297808
Akt1s1	0.0162943	0.14232	0.859	0.757	0.0297808
Rbfox2	0.0163191	0.145246	0.764	0.713	0.0298102
Rnf144a	0.0163471	0.134548	0.478	0.413	0.0298272
Actr1b	0.0163521	0.129438	0.68	0.567	0.0298272
Snapc2	0.0163543	0.123722	0.484	0.4	0.0298272
Mier3	0.0163966	0.126745	0.404	0.291	0.0298885
Nes	0.0165135	0.190519	0.768	0.64	0.0300856
Cdc20	0.0165429	0.172414	0.815	0.777	0.0301233
Atp11b	0.0166405	0.142043	0.615	0.563	0.030285
Cacnb4	0.0166713	0.178989	0.272	0.148	0.0303151
Chsy1	0.0166904	0.127229	0.469	0.395	0.0303151
Keap1	0.0166908	0.13532	0.733	0.682	0.0303151
Apln	0.0166922	-0.224165	0.053	0.165	0.0303151
Bex3	0.0167084	0.141269	0.992	1	0.0303214
Mbnl1	0.0167133	0.132896	0.642	0.558	0.0303214
Blm	0.0167269	0.134991	0.655	0.561	0.0303302
Snw1	0.0167663	0.144478	0.985	0.967	0.0303857
Pdcd5	0.0168266	0.14323	0.983	0.989	0.0304789
Rmst	0.0169274	0.247476	0.221	0.113	0.0306454
Dpm2	0.0170872	0.13129	0.718	0.629	0.0309183
Grpel1	0.0171521	0.140102	0.966	0.949	0.0310196
Becn1	0.0171696	0.130671	0.737	0.658	0.0310349
Pamr1	0.0171828	-0.122057	0.141	0.218	0.0310425
Hist1h1b	0.017225	0.224093	0.907	0.845	0.0311024
Bcap31	0.0172463	0.137654	0.918	0.878	0.0311246
1810058I24Rik	0.0172575	0.151934	0.96	0.936	0.0311286
Nrf1	0.0172986	0.140241	0.636	0.561	0.0311863
Srrm2	0.0173496	0.138096	0.992	1	0.031262
Fkbp11	0.0173742	0.140226	0.587	0.525	0.0312899
Hacl1	0.0174209	-0.114856	0.164	0.23	0.0313519
Anapc15	0.0174338	0.137934	0.72	0.645	0.0313519
Cdc6	0.0174359	0.155856	0.432	0.388	0.0313519
Ptk2	0.01749	0.128933	0.619	0.552	0.0314327
Dab2ip	0.0175189	0.134655	0.608	0.536	0.0314536
Hras	0.0175199	0.158015	0.928	0.934	0.0314536
Zc3hc1	0.0176656	0.130145	0.669	0.559	0.0316987
Tmem14c	0.0177006	0.150609	0.933	0.901	0.031745
Cdk2	0.0177824	0.125099	0.533	0.477	0.0318718
Gdnf	0.0177898	0.16908	0.312	0.19	0.0318718
Eloa	0.0179025	0.12917	0.602	0.514	0.0320571
Baiap2l1	0.0179386	0.132675	0.442	0.347	0.032105
Azin1	0.0180072	0.129898	0.663	0.541	0.0322112
Gm26853	0.0180428	0.134126	0.352	0.245	0.0322422
Prkra	0.0180474	0.143313	0.878	0.832	0.0322422
Micu2	0.0180527	0.136171	0.688	0.629	0.0322422
Heatr1	0.0180686	0.134542	0.379	0.289	0.0322541
Wfdc15b	0.01808	-0.263127	0.042	0.13	0.0322577
Ptcd2	0.0181779	0.130305	0.72	0.656	0.0324156
Tufm	0.0182075	0.135047	0.785	0.7	0.0324515
Pop7	0.0182348	0.137517	0.743	0.682	0.0324834
Zfp84	0.0182482	0.130352	0.385	0.294	0.0324905
Fbrsl1	0.0182693	0.121003	0.474	0.384	0.0325112
Efna4	0.0183153	0.138584	0.667	0.589	0.0325762
Dynlrb1	0.0183509	0.140461	0.971	0.958	0.0326228
Pgm2l1	0.0183809	0.141134	0.358	0.247	0.0326593
Wdr4	0.018492	0.125725	0.589	0.514	0.0328398
Gmnn	0.018517	0.152125	0.92	0.888	0.0328673
Morf4l2	0.018646	0.146128	0.992	0.989	0.0330791
Lrrc75a	0.0187282	0.115326	0.423	0.309	0.0332079
Mphosph9	0.0188658	0.131484	0.451	0.355	0.0334346
Rae1	0.0189135	0.138131	0.905	0.863	0.033502
Ubap2	0.0189763	0.152197	0.853	0.773	0.0335959
Ddx21	0.0190134	0.167451	0.914	0.863	0.0336315
Gm14964	0.0190159	0.145618	0.423	0.36	0.0336315
Nosip	0.0191135	0.127267	0.528	0.468	0.0337868
Msh3	0.0191302	0.127795	0.659	0.563	0.0337989
Mrpl54	0.0191586	0.138695	0.981	0.971	0.0338319
Zdhhc20	0.0192663	0.134533	0.693	0.605	0.0340046
Upf3a	0.0192994	0.137938	0.817	0.762	0.0340456
Rnf10	0.0193369	0.139966	0.863	0.804	0.0340943
Abcf1	0.0193578	0.144375	0.973	0.96	0.0341137
Mcrs1	0.0194362	0.138423	0.878	0.845	0.0342344
Wipi2	0.0194617	0.127504	0.665	0.567	0.0342617
Fgfrl1	0.019472	0.127528	0.638	0.587	0.0342623
Mpdu1	0.0194839	0.127889	0.674	0.587	0.0342658
Gtf2f2	0.0194942	0.130652	0.547	0.475	0.0342665
Slc25a33	0.0195574	0.120794	0.514	0.435	0.0343601
2900097C17Rik	0.0195806	0.14649	0.817	0.799	0.0343716
Vps4a	0.0195839	0.126662	0.611	0.576	0.0343716
Tmem120a	0.0196339	0.128119	0.52	0.399	0.0344417
Taf5	0.0196837	0.117426	0.568	0.463	0.0345115
Ankrd13a	0.0197007	0.120276	0.509	0.42	0.0345152
Synrg	0.0197072	0.130717	0.661	0.603	0.0345152
Slc29a1	0.0197158	0.130375	0.453	0.356	0.0345152
Prep	0.0197739	0.120402	0.539	0.448	0.0345994
Srek1	0.0198031	0.149721	0.926	0.925	0.0346071
Smarcc1	0.0198051	0.163473	0.973	0.976	0.0346071
Slit2	0.0198084	0.180692	0.52	0.459	0.0346071
Exosc7	0.0198433	0.141883	0.939	0.914	0.0346494
Cpsf1	0.0198565	0.128512	0.48	0.406	0.0346494
Uchl5	0.0198628	0.138039	0.844	0.771	0.0346494
Med8	0.019897	0.139376	0.861	0.815	0.0346914
Kat14	0.0199702	0.121841	0.419	0.338	0.0348014
Cenpb	0.0200433	0.143603	0.893	0.846	0.0349111
Ikbkap	0.0200931	0.134587	0.707	0.654	0.0349803
Bhlhe40	0.0201335	-0.167129	0.091	0.196	0.0350328
Zmynd19	0.0201824	0.139482	0.684	0.627	0.0350854
Mybbp1a	0.020184	0.159047	0.903	0.878	0.0350854
Hsd17b14	0.0202049	0.128297	0.364	0.287	0.035104
Ppil3	0.0202816	0.128005	0.68	0.569	0.0352195
Ykt6	0.0202946	0.126096	0.432	0.353	0.0352243
Fam103a1	0.0204788	0.135352	0.817	0.773	0.0355261
Pkmyt1	0.020598	0.130904	0.398	0.293	0.0356977
Ppp2r5d	0.0205984	0.134903	0.655	0.59	0.0356977
Urm1	0.0206568	0.126588	0.669	0.572	0.0357698
Rpn1	0.0206608	0.171681	0.912	0.898	0.0357698
Ndufb2	0.0208482	0.139281	0.935	0.931	0.0360762
Brk1	0.0208775	0.136766	0.949	0.934	0.0361087
Iqgap1	0.0209241	0.150583	0.884	0.848	0.0361678
Tmem208	0.0209326	0.139995	0.859	0.81	0.0361678
Dtl	0.0210243	0.155836	0.781	0.744	0.0363081
Gnl3	0.0210401	0.159473	0.958	0.945	0.0363171
Tox3	0.0210527	0.163131	0.638	0.521	0.0363206
Traf7	0.0210973	0.130455	0.768	0.704	0.0363794
[truncated: 1,472 more rows]

## Sheet: Cluster4_MutVsCTRL.DEGs
Gene	p_val	avg_logFC	pct.1	pct.2	p_val_adj
Gm10260	3.56e-65	1.79047	0.54	0.035	1.17e-62
Eif3j1	1.26e-39	0.575352	0.834	0.481	2.58e-37
Uba52	1.09e-82	0.514003	0.994	0.992	4.48e-80
Hist1h2ap	3e-20	0.496256	0.809	0.597	2.45e-18
Tpm3-rs7	1.12e-23	0.470185	0.521	0.141	1.4e-21
Hist3h2ba	2.4e-15	0.443742	0.834	0.649	1.51e-13
Nasp	2.23e-15	0.408271	0.953	0.824	1.46e-13
Erh	4.66e-26	0.389519	0.961	0.881	6.94e-24
Hmgn2	5.66e-14	0.363002	0.986	0.954	2.81e-12
Ctdspl	3.19e-11	0.3473	0.867	0.751	1e-09
Srsf2	9.28e-21	0.339369	0.983	0.951	7.99e-19
Irak1bp1	1.59e-15	0.331877	0.535	0.297	1.08e-13
Rps2	4.55e-104	0.318168	1	1	3.72e-101
Cox5b	5.71e-21	0.311721	0.994	0.973	5.19e-19
Hspa8	1.65e-36	0.308075	1	1	3e-34
Snrpg	7.91e-20	0.303972	0.981	0.965	6.16e-18
Gm10076	6.98e-19	0.302599	0.983	0.935	5.19e-17
Stmn1	6.88e-11	0.302067	1	0.992	1.97e-09
Slc9a5	0.00301798	0.297689	0.271	0.024	0.00672588
Isyna1	1.46e-10	0.295841	0.892	0.811	3.93e-09
Gstp1	1.88e-12	0.29468	0.596	0.354	8.31e-11
Mcm3	4.75e-07	0.293044	0.623	0.503	5.51e-06
Calm1	3.66e-12	0.292759	0.967	0.954	1.54e-10
Osr1	2.7e-07	0.290373	0.662	0.522	3.31e-06
Dut	6.45e-11	0.290328	0.934	0.895	1.88e-09
Nnat	1.59e-06	0.289868	0.756	0.681	1.52e-05
Tmsb10	4.63e-18	0.285501	0.997	0.997	3.29e-16
Pnmt	2.46e-05	0.284686	0.316	0.189	0.000155531
Il11ra1	1.57e-10	0.284287	0.557	0.389	4.15e-09
Rab26os	7.08e-12	0.281595	0.562	0.327	2.69e-10
Sfpq	2.25e-11	0.27722	0.978	0.957	7.35e-10
Nop56	1.5e-11	0.275939	0.947	0.908	5.46e-10
Fam32a	1.64e-11	0.275028	0.837	0.681	5.72e-10
Hmga1	9.51e-09	0.27428	0.44	0.208	1.64e-07
Arl3	1.97e-12	0.273237	0.922	0.841	8.49e-11
Eif5a	7.83e-15	0.265359	0.994	0.995	4.27e-13
Wdr6	2.42e-09	0.264129	0.745	0.595	4.93e-08
Col1a2	4.07e-07	0.263816	0.504	0.335	4.76e-06
Bcam	2.01e-06	0.263366	0.654	0.538	1.89e-05
Phb	5.46e-11	0.262066	0.878	0.751	1.62e-09
Smarca4	5.17e-09	0.259859	0.85	0.716	9.29e-08
Orc6	4.25e-09	0.25976	0.634	0.454	7.89e-08
Igfbp4	3.23e-06	0.25943	0.85	0.738	2.76e-05
Arf5	5.56e-12	0.256978	0.975	0.943	2.22e-10
Srsf3	5.56e-15	0.25585	0.997	0.995	3.2e-13
Mxd4	1.59e-08	0.254925	0.834	0.668	2.6e-07
Eif5	7.69e-11	0.25392	0.992	0.938	2.17e-09
Actl6a	1.24e-09	0.253365	0.839	0.703	2.67e-08
H19	0.000732472	0.253352	0.839	0.77	0.00235891
Pdia6	1.92e-10	0.253091	0.97	0.951	4.82e-09
Wdfy1	3.13e-09	0.252409	0.49	0.284	6.03e-08
Pebp1	4.8e-22	0.252104	0.997	0.995	5.23e-20
Kdelr2	3.06e-08	0.251254	0.781	0.63	4.68e-07
Ciapin1	1.68e-09	0.251238	0.657	0.465	3.52e-08
Bub3	2.87e-09	0.250475	0.723	0.589	5.65e-08
Ddx5	5.38e-15	0.248495	0.997	0.992	3.2e-13
Grcc10	4.39e-09	0.247769	0.676	0.495	7.98e-08
Tmem234	7.02e-09	0.245383	0.906	0.832	1.25e-07
Hells	9.33e-05	0.244441	0.446	0.351	0.000455728
D8Ertd738e	2.6e-10	0.243723	0.972	0.924	6.25e-09
Mcm5	1.28e-06	0.242847	0.512	0.357	1.25e-05
Srsf6	1.13e-09	0.241026	0.925	0.868	2.46e-08
Igfbp2	2.5e-05	0.240267	0.892	0.811	0.000156566
Ung	3.53e-05	0.2394	0.56	0.438	0.0002056
Hsp90aa1	3.84e-11	0.238926	1	0.997	1.16e-09
Mfge8	3.38e-05	0.238726	0.781	0.697	0.000198291
Ppia	1.94e-23	0.237928	1	1	2.27e-21
Serpinh1	1.53e-13	0.23742	0.997	0.989	7.34e-12
Nrbp1	5.09e-08	0.235869	0.698	0.592	7.51e-07
Crip2	4.81e-06	0.234527	0.657	0.503	3.88e-05
Hoxb9	1.83e-05	0.234465	0.778	0.697	0.000122606
Nudc	3.1e-10	0.234318	0.986	0.965	7.34e-09
Dynll1	3.28e-10	0.234302	0.994	0.989	7.67e-09
Pa2g4	9.39e-09	0.233282	0.934	0.892	1.63e-07
Taldo1	5.33e-08	0.232108	0.909	0.822	7.71e-07
Psmb6	1.25e-11	0.23207	0.989	0.968	4.63e-10
Pclaf	0.00205741	0.229666	0.385	0.286	0.0050768
Ubb	6.49e-25	0.227917	1	1	8.84e-23
Ucp2	2.2e-06	0.226536	0.792	0.689	2.03e-05
Mob2	8.25e-08	0.225824	0.504	0.316	1.15e-06
Ppa1	2.02e-06	0.225375	0.861	0.77	1.89e-05
Esd	2.71e-09	0.224905	0.967	0.914	5.41e-08
Wdr83os	9.94e-08	0.224347	0.895	0.757	1.34e-06
Hdac1	1.76e-07	0.224089	0.759	0.643	2.28e-06
Uqcr11	1.36e-12	0.224041	0.994	0.976	6.17e-11
Taf10	1.79e-07	0.224041	0.898	0.811	2.31e-06
Tipin	8.06e-06	0.223992	0.604	0.535	6.16e-05
Ap1s1	6.1e-07	0.223717	0.74	0.568	6.7e-06
Cnn3	5.03e-07	0.22339	0.892	0.83	5.8e-06
Sf3b4	2.57e-06	0.222556	0.69	0.578	2.31e-05
Ddost	5.75e-08	0.222293	0.936	0.87	8.26e-07
Fkbp1a	4.19e-09	0.222071	0.961	0.954	7.89e-08
Luc7l3	9.44e-08	0.221949	0.961	0.927	1.3e-06
Slc9a3r1	4.24e-06	0.22139	0.607	0.449	3.47e-05
Ewsr1	1.52e-07	0.220831	0.931	0.851	2.01e-06
Tpbg	3.79e-06	0.220333	0.554	0.427	3.18e-05
Psmd1	6.21e-07	0.220298	0.82	0.708	6.72e-06
Spock2	0.000145561	0.219837	0.931	0.892	0.000649702
Dnaja1	7.76e-09	0.219236	0.997	0.984	1.36e-07
Ptpn1	6.01e-07	0.218601	0.651	0.492	6.64e-06
Cited1	0.19861	0.217826	0.776	0.757	0.20232
Ptms	5.09e-07	0.217718	0.994	0.968	5.82e-06
Ndufa2	2.58e-10	0.217394	0.994	0.962	6.25e-09
Ssr2	1.93e-08	0.217245	0.961	0.935	3.09e-07
Dtymk	5.82e-07	0.217218	0.798	0.784	6.52e-06
Maged1	5.05e-08	0.216966	0.967	0.908	7.51e-07
Ndufa4	6.22e-10	0.216964	0.997	0.992	1.41e-08
Slc25a5	7.84e-07	0.216483	0.967	0.941	8.17e-06
Ppp1r14b	3.15e-07	0.216366	0.997	0.978	3.76e-06
Sel1l3	2.59e-05	0.216361	0.421	0.257	0.000159984
Ube2l3	2.3e-07	0.214858	0.917	0.832	2.9e-06
Ube2d2a	1.96e-07	0.214744	0.878	0.781	2.49e-06
Hnrnpa3	2.34e-07	0.214506	0.994	0.978	2.92e-06
Snrpa1	8.16e-07	0.214298	0.859	0.746	8.45e-06
Vcp	1.49e-08	0.213838	0.989	0.978	2.48e-07
Gm7324	0.0890612	0.213133	0.224	0.016	0.0940027
Zfp428	2.67e-06	0.212577	0.776	0.684	2.36e-05
Snx6	6e-07	0.212017	0.875	0.805	6.64e-06
H3f3a	7.55e-28	0.211489	1	1	1.23e-25
Gnas	2.59e-13	0.210987	1	0.997	1.21e-11
H2afz	3.38e-05	0.210616	1	1	0.000198291
Cfl1	8.46e-11	0.210202	1	0.997	2.35e-09
Ccar1	3.96e-06	0.209947	0.914	0.87	3.28e-05
Fabp5	0.00195241	0.209585	0.906	0.924	0.00486566
Lmnb1	5.92e-05	0.209128	0.848	0.749	0.000318806
Aimp2	1.26e-06	0.209069	0.679	0.543	1.24e-05
Psma4	1.02e-08	0.208382	0.978	0.932	1.74e-07
Ndufa3	7.74e-07	0.207943	0.931	0.889	8.17e-06
Chmp6	6.25e-07	0.207877	0.524	0.351	6.72e-06
Tomm40	9.2e-07	0.207757	0.895	0.838	9.41e-06
Zcchc7	4.73e-06	0.207435	0.659	0.535	3.85e-05
Fdps	7.27e-05	0.207227	0.499	0.368	0.00037418
Hoxb5os	0.00019274	0.206644	0.41	0.338	0.00081266
Cox6c	3.8e-11	0.205897	0.997	1	1.16e-09
Map2k3	2.42e-06	0.205797	0.726	0.554	2.2e-05
Romo1	1.35e-07	0.205728	0.961	0.908	1.79e-06
Parl	1.21e-06	0.205683	0.684	0.511	1.2e-05
Marcksl1	1.29e-08	0.205532	1	0.984	2.17e-07
Ttc28	0.000632231	0.205314	0.922	0.9	0.0021023
Slc1a5	0.132721	0.204751	0.208	0.027	0.137861
Atp5k	1.76e-08	0.204733	1	0.984	2.85e-07
Mpzl1	3.32e-05	0.204558	0.792	0.719	0.000195916
Atp5e	1.89e-11	0.204544	0.997	0.995	6.29e-10
Zfp326	4.17e-06	0.204465	0.751	0.665	3.43e-05
Hoxb2	0.000157396	0.204278	0.698	0.597	0.000686666
Smarce1	1.84e-07	0.203641	0.953	0.905	2.35e-06
Psmc5	1.64e-07	0.203605	0.942	0.905	2.15e-06
Dhx34	0.00508327	0.203468	0.294	0.211	0.00998347
Mcm2	1.59e-05	0.203152	0.582	0.5	0.000108764
Rrs1	2.36e-06	0.203023	0.651	0.532	2.16e-05
Dcakd	1.62e-05	0.202896	0.795	0.703	0.000110312
Eno1	1.31e-07	0.202625	0.997	0.997	1.76e-06
Ssbp4	3.26e-05	0.201105	0.917	0.816	0.000193001
Cycs	0.000175671	0.200165	0.795	0.714	0.000752349
Ndufa5	8.31e-07	0.20004	0.928	0.854	8.55e-06
Usp50	1.88e-05	0.198623	0.482	0.378	0.000125563
Rbm3	1.67e-10	0.198195	1	0.997	4.34e-09
Usp1	7.77e-05	0.196915	0.615	0.514	0.000393367
Ube2r2	1.15e-06	0.196776	0.945	0.895	1.15e-05
Psma1	6.15e-07	0.196766	0.936	0.873	6.71e-06
Hnrnpdl	2.45e-06	0.196475	0.92	0.873	2.21e-05
Tsc22d1	4.95e-06	0.196404	1	0.997	3.95e-05
Uqcrc1	5.68e-07	0.195978	0.947	0.895	6.4e-06
Adrm1	1.17e-05	0.195933	0.737	0.616	8.49e-05
Lrrc59	1.26e-05	0.195921	0.723	0.603	9.03e-05
Tra2b	1.14e-06	0.195636	0.97	0.954	1.15e-05
Xylt1	1.92e-05	0.195609	0.507	0.341	0.000127558
Ptpa	7.82e-06	0.19556	0.601	0.508	6.01e-05
Pfn1	2.43e-07	0.195524	0.992	0.984	3.02e-06
Zfp422	9.28e-06	0.195463	0.767	0.662	6.96e-05
Prmt1	1.83e-10	0.195211	0.997	0.995	4.68e-09
Snrpf	4.6e-08	0.195063	0.989	0.978	6.9e-07
Rpl27	8.5e-10	0.195001	0.994	0.989	1.88e-08
Manf	1.29e-05	0.194814	0.842	0.757	9.2e-05
Nucks1	0.000337458	0.19458	0.936	0.897	0.00125473
Fgfr1	0.00064534	0.194456	0.892	0.851	0.00213288
Tomm7	2.17e-08	0.194267	0.992	0.97	3.42e-07
Baz1a	2.87e-05	0.194228	0.562	0.441	0.00017408
Git2	1.42e-05	0.19381	0.582	0.435	9.92e-05
Pdia3	9.78e-05	0.193579	0.903	0.876	0.000470371
H2afy	2.49e-08	0.193386	0.989	0.986	3.85e-07
Sumo3	8.2e-06	0.193053	0.867	0.824	6.24e-05
Psmb3	1.12e-05	0.192548	0.939	0.884	8.15e-05
Mdk	3.06e-05	0.192451	0.997	0.989	0.000184262
Ube2n	2.4e-05	0.192391	0.9	0.873	0.000153269
Evl	7.06e-06	0.192233	0.77	0.695	5.45e-05
Atp5a1	5.92e-12	0.19174	1	1	2.31e-10
Rpa2	6.85e-05	0.191411	0.496	0.354	0.000360593
Maged2	0.000231435	0.191388	0.839	0.741	0.000934885
Atp5b	2.42e-10	0.191071	1	1	6e-09
Stip1	9.94e-06	0.190852	0.867	0.751	7.39e-05
Ostc	2.1e-06	0.190262	0.917	0.811	1.96e-05
Rnf187	1.56e-06	0.190079	0.939	0.903	1.5e-05
Psmb7	3.62e-06	0.189857	0.9	0.849	3.07e-05
Brd3	0.000116007	0.1895	0.825	0.743	0.000539168
Gps1	1.35e-05	0.189247	0.787	0.684	9.47e-05
Sec61g	1.86e-09	0.189232	0.994	0.973	3.85e-08
Srrt	3.1e-05	0.189192	0.737	0.657	0.000185163
Atp5j2	5.23e-08	0.18897	0.994	0.995	7.64e-07
Mcm6	0.00294818	0.188502	0.759	0.665	0.00659811
Ppp2r2d	8.88e-06	0.188452	0.554	0.405	6.69e-05
Mcm7	0.000560203	0.187973	0.831	0.808	0.00190539
Cdc42	1.09e-06	0.187958	0.978	0.949	1.11e-05
Hmgb2	0.00181562	0.18772	0.92	0.911	0.00462822
Ndufv1	6.76e-06	0.18754	0.881	0.808	5.27e-05
Tma7	5.62e-06	0.187272	0.986	0.959	4.44e-05
Snhg12	7.2e-05	0.187144	0.837	0.768	0.000371581
Suclg1	5.68e-06	0.186749	0.928	0.824	4.47e-05
mt-Cytb	6.07e-08	0.186732	1	1	8.63e-07
Mat2a	4.17e-05	0.186423	0.922	0.868	0.000236159
Cnbp	2.02e-08	0.18616	0.997	0.984	3.2e-07
Ptma	1.62e-11	0.185675	1	1	5.72e-10
Smarcd1	3.59e-05	0.185307	0.77	0.708	0.000208437
Igfbp5	0.00559761	0.185224	0.909	0.868	0.0105519
Zfp148	3.23e-05	0.185147	0.745	0.681	0.00019214
Ranbp1	7.62e-05	0.184687	0.978	0.949	0.000388206
Col1a1	0.000399069	0.184607	0.432	0.278	0.00145084
Plpp3	0.000190488	0.184308	0.49	0.386	0.000807354
2610524H06Rik	2.97e-05	0.184277	0.684	0.605	0.000179402
Ctdnep1	5.96e-05	0.184123	0.704	0.568	0.000319429
Ddx39b	2.71e-07	0.184061	0.986	0.97	3.31e-06
Zfr	4.44e-05	0.183575	0.734	0.597	0.000248826
P4hb	1.12e-05	0.1835	0.864	0.819	8.15e-05
Ywhah	2.51e-05	0.183482	0.753	0.635	0.000156566
Cdk4	3.5e-07	0.183464	0.997	0.997	4.12e-06
Mfap4	0.00053881	0.183423	0.834	0.778	0.00184717
Cnih1	2.45e-05	0.183069	0.634	0.53	0.000155046
Nme1	9.73e-05	0.182707	0.992	0.989	0.000469491
Tspan31	2.58e-05	0.182575	0.709	0.576	0.000159693
Rbm25	3.08e-06	0.182532	0.989	0.973	2.65e-05
Cebpg	1.52e-05	0.18247	0.565	0.386	0.000105402
Coq5	2.03e-05	0.182432	0.582	0.405	0.000133266
Alyref	0.000208507	0.181811	0.823	0.743	0.000867983
Sfr1	1.53e-06	0.181769	0.983	0.965	1.48e-05
Arf1	2.84e-06	0.181672	0.972	0.959	2.47e-05
Cpxm1	0.000207992	0.181439	0.848	0.814	0.000867983
Tmem258	3.84e-06	0.181398	0.967	0.927	3.2e-05
Arid4a	0.000101854	0.181361	0.546	0.4	0.000482995
Epop	0.00025667	0.18065	0.438	0.324	0.0010192
Eif4a3	2.65e-05	0.180629	0.867	0.814	0.000162847
H2afy2	9.91e-05	0.180589	0.861	0.778	0.000473202
Oaz1	7.28e-10	0.180569	1	1	1.63e-08
Ppp1ca	2.84e-07	0.180554	0.994	0.986	3.44e-06
Nhp2	0.000107895	0.180411	0.87	0.814	0.00050723
Hspa5	0.000287945	0.180268	0.983	0.973	0.00110658
Ylpm1	0.000365874	0.180252	0.601	0.503	0.0013361
Hnrnpm	2.58e-06	0.180082	0.986	0.962	2.31e-05
Eif4h	4.95e-06	0.179897	0.956	0.949	3.95e-05
Txn2	2.05e-05	0.179877	0.856	0.83	0.000133482
Gpx4	3.28e-07	0.179805	0.992	0.986	3.89e-06
Bcl2	0.00857825	0.179691	0.704	0.643	0.0144979
Dnajc9	0.00025891	0.179512	0.681	0.562	0.00102561
Elob	5.32e-07	0.179465	0.997	0.992	6.04e-06
Nudcd2	0.000270562	0.179348	0.812	0.768	0.00105409
Tmem263	3.71e-05	0.17905	0.465	0.311	0.000213235
Cops3	8e-05	0.178942	0.753	0.697	0.00040139
Tyms	0.000146606	0.178776	0.515	0.424	0.000651759
Atp5g3	1.34e-06	0.178576	0.994	0.968	1.31e-05
Mrpl58	2.7e-05	0.178486	0.837	0.781	0.000165263
Ppil1	6.49e-05	0.178399	0.715	0.6	0.000343636
Fkbp10	0.000228671	0.178206	0.684	0.573	0.000928302
Tbc1d10a	0.00133262	0.17819	0.352	0.241	0.00360954
Mtch1	2.91e-06	0.178125	0.981	0.951	2.52e-05
Tnpo3	6.96e-05	0.178024	0.723	0.568	0.000361615
Cyb5r3	0.000281636	0.177959	0.753	0.676	0.00109184
Sap18	5e-05	0.177871	0.828	0.738	0.000277013
Cdc5l	0.000100965	0.177829	0.759	0.708	0.000480173
Zfp846	0.0117525	0.177776	0.283	0.127	0.0182767
Ran	1.34e-05	0.177259	0.992	0.997	9.4e-05
Mest	0.025337	0.177181	0.989	0.943	0.0321376
Fkbp8	9.37e-05	0.177068	0.881	0.832	0.000456149
Pomp	2.83e-06	0.177057	0.97	0.959	2.47e-05
Ndufa1	3.45e-05	0.177038	0.831	0.7	0.000201708
Luzp1	7.2e-05	0.176747	0.745	0.676	0.000371581
Vdac3	9.82e-06	0.176497	0.956	0.935	7.34e-05
Smc1a	0.000173987	0.17644	0.936	0.916	0.000749059
Ube2k	0.000121206	0.176431	0.848	0.781	0.000557005
Ywhab	2.49e-05	0.176402	0.931	0.9	0.000156566
Pja2	6.23e-05	0.176331	0.665	0.538	0.000331888
Brix1	5.44e-05	0.176301	0.773	0.7	0.000298919
Hmgb3	0.000683669	0.176141	0.97	0.924	0.00222362
Bzw1	1.72e-05	0.175991	0.964	0.905	0.000116544
Fkbp3	7.66e-07	0.175593	0.994	0.976	8.17e-06
Nktr	0.000282387	0.175483	0.87	0.808	0.00109216
Fmc1	0.000131315	0.175251	0.737	0.616	0.000598416
Calr	0.000299842	0.175186	0.975	0.978	0.0011408
Sparc	8.71e-05	0.17511	0.997	0.992	0.000431704
Naa35	6.96e-05	0.174907	0.679	0.549	0.000361615
Psmc4	8.74e-05	0.174907	0.867	0.838	0.000431875
Anxa6	5.21e-05	0.1747	0.543	0.359	0.000287219
Pepd	0.000141185	0.174565	0.717	0.622	0.000634555
Eif4g2	1.56e-05	0.17403	0.994	0.992	0.000106891
Glyr1	6.62e-05	0.17397	0.69	0.589	0.000349382
Tssc4	6.29e-05	0.173788	0.554	0.459	0.00033391
Ift27	6.93e-05	0.173738	0.571	0.443	0.000361615
Samm50	7.69e-05	0.173414	0.803	0.735	0.000390514
Cops6	4.6e-05	0.173308	0.914	0.854	0.000256875
Cirbp	0.000147058	0.173293	0.751	0.668	0.000651996
Serp1	0.000117943	0.173142	0.654	0.551	0.000546614
Psma7	7.84e-07	0.17312	0.997	0.997	8.17e-06
Rbm42	0.000262952	0.17251	0.673	0.562	0.0010366
Cited2	0.00442317	0.172473	0.812	0.722	0.00906867
Zranb2	2.26e-05	0.172288	0.936	0.895	0.000145851
Prdx1	1.02e-05	0.172242	1	0.986	7.54e-05
Hnrnpu	0.000160667	0.172124	0.997	0.997	0.000699072
Mrpl18	8.13e-05	0.171984	0.903	0.849	0.000406302
Srsf10	5.56e-05	0.171909	0.92	0.865	0.000304344
Cox7b	1.69e-06	0.171698	0.981	0.968	1.61e-05
Nol7	0.000113193	0.171686	0.87	0.824	0.000528261
Actg1	1.95e-06	0.171434	1	1	1.84e-05
Fubp1	1.31e-05	0.171291	0.989	0.962	9.27e-05
Apex1	5.72e-05	0.171201	0.958	0.905	0.000312052
Smarcb1	5.97e-05	0.171016	0.845	0.811	0.000319429
Clmp	0.00126705	0.170926	0.917	0.824	0.00348972
Zfp280d	0.000136833	0.170881	0.604	0.489	0.000620107
Ndufb8	1.75e-05	0.170871	0.972	0.959	0.000117853
Dcn	0.015854	0.170825	0.296	0.17	0.0229125
Ak2	0.000113337	0.17082	0.936	0.865	0.000528261
Psmb2	4.44e-05	0.170813	0.922	0.895	0.000248826
Denr	5.91e-05	0.170529	0.889	0.857	0.000318806
Ssb	5.58e-06	0.169921	0.989	0.976	4.43e-05
Psmd13	7.59e-05	0.169835	0.85	0.776	0.000387963
Pcp4	0.0821008	0.169675	0.374	0.284	0.0871622
Aes	0.000460077	0.16964	0.986	0.976	0.00163273
Cdh2	9.44e-05	0.169578	0.767	0.619	0.000458498
Upf3b	0.000413293	0.169285	0.773	0.741	0.0014926
Fkbp9	9.25e-05	0.169005	0.543	0.4	0.000453146
Exosc8	0.000278425	0.168933	0.67	0.632	0.00108195
Tmem208	9.92e-05	0.168836	0.734	0.643	0.000473202
Gapdh	9.33e-08	0.168825	1	1	1.29e-06
Snw1	1.66e-05	0.168656	0.947	0.903	0.000112793
Arl2bp	0.000210236	0.168545	0.742	0.646	0.000870752
Myc	0.000217086	0.16847	0.571	0.422	0.000888869
Rrm2	0.182594	0.168201	0.191	0.095	0.187171
Cct3	7.79e-07	0.168132	0.992	0.978	8.17e-06
Rtf1	0.000236752	0.167824	0.9	0.878	0.000951661
Csnk2b	0.00015274	0.167776	0.931	0.876	0.000669256
Dnmt1	0.00448118	0.16763	0.532	0.497	0.00912977
Map2k2	0.00012414	0.167621	0.892	0.868	0.000567299
Rnf10	0.000227825	0.167281	0.72	0.576	0.000927169
Foxc1	0.000785352	0.167032	0.582	0.5	0.00247423
Dnajc19	8.67e-05	0.166954	0.765	0.611	0.000431153
Umps	0.000538145	0.166924	0.493	0.403	0.00184717
Tubb5	6.34e-06	0.166737	1	1	4.97e-05
mt-Nd1	3.09e-05	0.166686	1	0.997	0.000185163
Ckb	0.0795067	0.166635	0.548	0.495	0.0844629
Gars	0.000152996	0.166276	0.701	0.581	0.000669256
Set	3.72e-06	0.166215	1	1	3.14e-05
Uhrf1	0.00399611	0.166174	0.391	0.311	0.00835863
Tmpo	0.000585635	0.166143	0.837	0.773	0.00198364
Polr2j	5.78e-05	0.166125	0.917	0.862	0.000314339
C2cd4b	0.466532	0.165979	0.102	0.027	0.467675
Psmd2	0.000320977	0.165828	0.875	0.841	0.00120717
Prdx2	3.87e-10	0.165806	1	0.992	8.91e-09
Dek	0.000493044	0.165692	0.958	0.957	0.00173095
Timm13	8.87e-06	0.165612	0.981	0.949	6.69e-05
Mcrip1	0.0001507	0.165489	0.917	0.805	0.00066634
Timm17a	0.000119652	0.165442	0.809	0.738	0.000552969
Akr1b3	0.000303121	0.165424	0.69	0.57	0.00114793
Hmbs	0.000185794	0.165232	0.634	0.5	0.000789503
G3bp1	2.8e-05	0.165074	0.989	0.968	0.00017095
Actb	0.00014358	0.165034	1	1	0.000643552
Gdi2	2.25e-05	0.164926	0.967	0.949	0.000145323
Ankrd11	9.89e-05	0.164835	0.961	0.949	0.000473202
Myl6	3.17e-06	0.164644	1	0.997	2.71e-05
Eif1	9.39e-11	0.164605	1	1	2.56e-09
Ccdc25	0.000869795	0.164559	0.413	0.262	0.00266476
Dynlrb1	0.000138453	0.16453	0.898	0.83	0.000625714
Zfp503	0.00463803	0.164491	0.812	0.797	0.00932165
5430416N02Rik	0.000262374	0.164387	0.432	0.303	0.0010366
Trim35	0.00299664	0.163972	0.748	0.705	0.00669741
Sf3b5	0.00019323	0.163682	0.873	0.808	0.00081266
Nap1l4	0.000270329	0.163427	0.875	0.786	0.00105409
Ywhaz	0.000288143	0.163424	0.934	0.908	0.00110658
Sem1	1.07e-05	0.163421	0.989	0.989	7.87e-05
Hsp90b1	0.00078643	0.163409	0.978	0.978	0.00247423
Sucla2	0.000152468	0.163365	0.723	0.622	0.000669256
G3bp2	0.000207901	0.163333	0.892	0.832	0.000867983
Sar1a	0.000232603	0.163318	0.706	0.632	0.000937288
Naa50	0.000531941	0.163255	0.74	0.654	0.00184717
Uqcrq	0.000407552	0.163023	0.947	0.903	0.00147512
Pcbp1	1.3e-05	0.162409	0.975	0.957	9.22e-05
Tfdp1	0.000328205	0.162409	0.573	0.441	0.00123152
Wfdc2	0.0789471	0.162331	0.579	0.503	0.083923
Aprt	9.01e-05	0.162293	0.978	0.965	0.000443825
Psmd4	0.000140028	0.162065	0.95	0.911	0.000631092
Brd2	0.00034921	0.162047	0.767	0.708	0.00128974
Crip1	0.000638763	0.162036	0.562	0.4	0.00211834
Psmb4	4.77e-05	0.161798	0.975	0.951	0.000265393
Msrb1	0.000246241	0.161564	0.532	0.416	0.00098256
Nelfcd	0.000212985	0.161408	0.582	0.47	0.000877692
Hnrnpd	0.000108552	0.161201	0.992	0.986	0.000508858
Cops5	0.000213579	0.161076	0.909	0.857	0.000877928
Tsn	9.61e-05	0.161057	0.961	0.93	0.000465091
Mrfap1	3.12e-07	0.160912	0.997	0.992	3.75e-06
Smim4	0.00027061	0.160844	0.765	0.662	0.00105409
Eif4a1	6.47e-08	0.160839	1	1	9.13e-07
Psma3	5.81e-05	0.160834	0.981	0.97	0.00031471
Mcm4	0.00141116	0.160785	0.535	0.432	0.00377232
Cox7c	1.51e-08	0.160642	0.997	1	2.5e-07
Ndufs2	1.02e-05	0.160623	0.992	0.954	7.54e-05
Mrpl3	0.000302827	0.160191	0.657	0.519	0.00114793
Nop14	0.000539697	0.160046	0.706	0.632	0.00184717
Hmgn1	2.83e-06	0.159861	1	1	2.47e-05
Hoxa5	0.000452805	0.1596	0.432	0.311	0.00161542
Top2b	0.000535354	0.159581	0.909	0.881	0.00184717
Mrps36	0.000293748	0.159544	0.74	0.649	0.00112283
Tubb4b	0.00832899	0.159404	0.695	0.627	0.0141792
Hras	0.000617906	0.159309	0.776	0.668	0.00206305
Syncrip	0.000891662	0.159177	0.884	0.854	0.00272156
Idh3g	0.000269182	0.159036	0.842	0.776	0.00105409
Arid4b	0.0014183	0.158862	0.895	0.862	0.00378522
Mdh2	2.31e-05	0.158735	0.964	0.962	0.000148116
Cdca7	0.001954	0.158704	0.695	0.651	0.00486566
Atad2	0.0112104	0.158616	0.374	0.281	0.0177544
Polr2a	0.000934407	0.15856	0.778	0.692	0.00280371
Arpc1b	0.000594502	0.158522	0.632	0.508	0.00200951
Ppil4	0.000694118	0.158501	0.67	0.554	0.00225313
Timeless	0.00420192	0.15842	0.343	0.216	0.00869069
Trmt6	0.000895558	0.158392	0.432	0.327	0.00272837
Mrps25	0.000311666	0.158324	0.704	0.622	0.00117485
Srsf7	0.000400923	0.158086	0.956	0.927	0.00145435
Dpp3	0.000335508	0.1577	0.499	0.365	0.00125318
Nt5dc2	7.31e-05	0.15769	0.986	0.984	0.000375059
Prpf38a	0.000445033	0.157648	0.69	0.622	0.00160338
Dynlt1f	0.000311231	0.157409	0.612	0.5	0.00117485
Cbx1	1.53e-05	0.157362	0.994	0.978	0.000105402
Cenpf	0.291663	0.157247	0.235	0.197	0.294544
Aen	0.000537648	0.157198	0.438	0.311	0.00184717
Phgdh	0.00859923	0.157132	0.975	0.959	0.0145184
Edf1	0.000123224	0.15707	0.947	0.903	0.000564689
Rcc1	0.00761259	0.15705	0.299	0.178	0.0132633
Eya1	0.00545542	0.156917	0.784	0.803	0.0104461
Tubb2b	0.0153241	0.156743	0.69	0.665	0.0223842
Ddx1	0.000209218	0.156491	0.925	0.827	0.000868732
Lamp1	0.000164104	0.156415	0.911	0.868	0.00071025
Dhrs1	0.000349239	0.156039	0.562	0.389	0.00128974
Acat2	0.000651556	0.155961	0.432	0.305	0.00214476
Pdcd4	0.000354449	0.15588	0.956	0.927	0.00129727
Rnf7	0.000184348	0.155855	0.922	0.841	0.000785401
Rpl35	1.04e-21	0.15582	1	1	1.07e-19
Hnrnpa2b1	0.000162175	0.155661	0.997	0.992	0.000703762
Rfc2	0.00257566	0.155653	0.695	0.614	0.00599594
Copz1	0.000549735	0.155245	0.809	0.681	0.00187368
H2afv	0.00208462	0.154969	0.986	0.981	0.00509025
Ppp1cc	0.000240971	0.154449	0.95	0.881	0.000963884
Hdhd2	0.000453054	0.154437	0.568	0.457	0.00161542
Noc4l	0.000715005	0.154437	0.432	0.289	0.00231633
Snrpb	2.81e-05	0.154361	0.986	0.986	0.000171001
Nono	0.000151282	0.154335	0.989	0.973	0.00066711
Pmf1	0.000537474	0.154095	0.529	0.411	0.00184717
Tril	0.305532	0.154045	0.778	0.759	0.307979
Nop58	0.00048252	0.153887	0.958	0.938	0.0017013
Phip	0.0027276	0.153863	0.87	0.786	0.00626565
Fbxo22	0.000650701	0.153837	0.587	0.505	0.00214476
Capza2	0.00049042	0.153651	0.848	0.827	0.00172543
Psmf1	0.00154475	0.153644	0.366	0.235	0.00406305
Jtb	0.000532455	0.153626	0.67	0.581	0.00184717
Hnrnpc	3.83e-05	0.1535	0.997	0.986	0.000218822
Psma2	7.82e-05	0.153495	0.975	0.951	0.000395018
B9d1	0.000348121	0.153406	0.643	0.492	0.00128974
Psip1	0.00142601	0.153378	0.925	0.911	0.00379959
Appbp2	0.000991966	0.153242	0.64	0.557	0.00293317
Elavl1	0.000934063	0.153081	0.831	0.714	0.00280371
Gm266	0.00156058	0.153024	0.92	0.83	0.00409809
Ola1	0.000445928	0.152628	0.886	0.851	0.00160338
Cops8	0.000518016	0.152271	0.801	0.719	0.00180698
Prr5l	0.000535235	0.152257	0.521	0.389	0.00184717
Cotl1	0.00415356	0.151979	0.637	0.578	0.00862337
Dazap1	0.000600147	0.151975	0.792	0.784	0.00202025
Zfp704	0.00132509	0.151964	0.753	0.603	0.0035951
Irak1	0.000659645	0.151947	0.568	0.459	0.00215983
Top1	0.000299441	0.15191	1	1	0.0011408
Anapc13	0.000773015	0.151902	0.884	0.832	0.00245275
Larp7	0.00079944	0.15186	0.787	0.776	0.00249121
Ube2g1	0.000350253	0.151832	0.518	0.405	0.00128974
Ndufc1	0.000217327	0.151798	0.947	0.959	0.000888869
Six2	0.0616162	0.15178	0.911	0.889	0.0664934
Gnb2	0.000192721	0.151714	0.986	0.981	0.00081266
Dtl	0.00968624	0.151578	0.432	0.327	0.0157522
Cbfb	0.0016731	0.151569	0.388	0.281	0.00434475
Banf1	0.00079632	0.15151	0.928	0.932	0.00248622
Snx24	0.000973772	0.151377	0.429	0.314	0.00288603
Gmps	0.000735014	0.151303	0.831	0.749	0.00236244
Crym	0.090738	0.151237	0.787	0.781	0.0955875
Psmb5	7.89e-05	0.150972	0.981	0.978	0.000397256
Ywhaq	0.0001751	0.150912	0.986	0.973	0.000751873
Rps19bp1	0.000848006	0.150756	0.665	0.605	0.00261269
Trir	0.000263877	0.150743	0.97	0.916	0.00103775
Cul3	0.000657646	0.150564	0.842	0.703	0.00215983
Mrpl30	0.000183596	0.150513	0.945	0.9	0.000784238
Parp1	0.00153309	0.150497	0.881	0.819	0.00403888
Dhx15	0.00339786	0.150495	0.789	0.749	0.00736277
Hmgn3	0.0021452	0.150492	0.762	0.659	0.00522253
Ddx18	0.000504532	0.150476	0.873	0.822	0.00176748
Bbc3	0.00336777	0.150394	0.368	0.259	0.00730725
Morf4l2	0.000949073	0.150389	0.961	0.935	0.0028282
Phf5a	0.00105595	0.150301	0.917	0.868	0.00309593
Pcbp4	0.00124237	0.150296	0.9	0.884	0.00343911
Rcbtb2	0.00079043	0.150294	0.737	0.657	0.00247729
Kmt5a	0.00366751	0.150188	0.712	0.657	0.00780241
Supt20	0.000863841	0.150138	0.618	0.546	0.00265647
Eif2s1	0.000769559	0.14999	0.839	0.824	0.00244941
Pfn2	0.00123503	0.149971	0.562	0.481	0.00343039
Fis1	0.000610351	0.149788	0.922	0.93	0.00205038
Timm50	0.000745675	0.149788	0.709	0.635	0.00239201
Ift52	0.000795759	0.149788	0.49	0.359	0.00248622
Snrpd3	9.1e-05	0.149757	0.967	0.946	0.000447269
Gfer	0.00118341	0.149702	0.643	0.541	0.00333902
Bmper	0.00294063	0.149551	0.357	0.195	0.00659157
mt-Nd4	2.05e-05	0.149539	1	0.997	0.000133482
Tsfm	0.000660093	0.149524	0.626	0.516	0.00215983
Snrpa	0.000901643	0.149407	0.895	0.838	0.0027418
Foxp1	0.00325116	0.149263	0.928	0.911	0.00711083
Zwint	0.00122478	0.149247	0.731	0.603	0.00340773
Cd24a	0.000336391	0.149177	0.983	0.973	0.00125361
Nxf1	0.000834109	0.149175	0.92	0.868	0.00258938
Srm	0.0146275	0.149138	0.784	0.743	0.0216007
Anp32b	0.000120923	0.149118	0.997	0.997	0.000557005
Skp2	0.00185785	0.148974	0.402	0.273	0.00468327
Ube2m	0.00101542	0.148888	0.934	0.905	0.00299212
U2af1	0.000453225	0.148847	0.978	0.957	0.00161542
Aco2	0.000472109	0.148842	0.895	0.805	0.0016718
Zfp553	0.000669474	0.148765	0.524	0.414	0.00218179
Rpn2	0.000904132	0.148712	0.842	0.751	0.00274427
Atp5j	1.25e-05	0.148683	0.994	0.997	9.03e-05
Fam133b	0.00140071	0.148543	0.831	0.754	0.00375051
Rac1	0.000625136	0.148536	0.884	0.854	0.00208294
Dusp11	0.000965653	0.148482	0.693	0.641	0.00286717
Tle1	0.000774976	0.148478	0.518	0.403	0.00245275
Fam213a	0.0247819	0.148428	0.859	0.811	0.0316777
Chtf8	0.00170004	0.148378	0.62	0.492	0.00439378
Cops9	0.00115291	0.148218	0.861	0.83	0.00329174
Ssna1	0.000993262	0.147896	0.715	0.614	0.00293317
Rtcb	0.000928442	0.147752	0.85	0.841	0.00280246
N4bp2	0.00109681	0.147715	0.626	0.535	0.0031759
Tuba1a	0.00553187	0.147685	0.873	0.789	0.0104868
Ptrh2	0.000762785	0.147652	0.571	0.5	0.00243259
Nectin3	0.000844676	0.147558	0.532	0.419	0.00260734
Anapc5	0.000459741	0.147523	0.936	0.919	0.00163273
Prim1	0.0023988	0.147227	0.413	0.322	0.00569584
Ssrp1	0.00082837	0.147203	0.953	0.927	0.00257645
Hmg20b	0.00190831	0.147139	0.745	0.668	0.00478834
Trp53	0.00314024	0.147125	0.842	0.803	0.00695543
Akr7a5	0.00126254	0.14701	0.856	0.773	0.00348318
Smc3	0.00133907	0.146899	0.967	0.954	0.00362102
Arl16	0.00650337	0.146899	0.335	0.241	0.011901
Ncbp1	0.000942479	0.146889	0.512	0.368	0.00281368
Tfg	0.00107774	0.146831	0.731	0.616	0.00314292
Ythdf2	0.00128301	0.146819	0.69	0.581	0.00350601
Atox1	0.000617395	0.146784	0.906	0.846	0.00206305
Hnrnpll	0.0012373	0.146711	0.598	0.505	0.00343089
Uba5	0.000935714	0.146708	0.543	0.419	0.00280371
Gstk1	0.0350219	0.14644	0.283	0.157	0.040722
Vdac1	5.08e-05	0.146392	0.994	0.981	0.000280934
Uri1	0.00186609	0.146363	0.676	0.592	0.00469682
Lsm6	0.00264682	0.146292	0.817	0.768	0.00613342
Eif2a	0.00121181	0.146283	0.859	0.803	0.0033979
Psmd6	0.000727177	0.146232	0.9	0.873	0.00235076
Rbbp7	0.0019169	0.146232	0.925	0.897	0.00480253
Uba2	0.00136191	0.14621	0.842	0.8	0.00367066
Mrps12	0.000942306	0.146203	0.745	0.659	0.00281368
Fnta	0.00116955	0.146195	0.765	0.678	0.00332185
Gorasp2	0.00208647	0.146138	0.488	0.386	0.00509025
Napa	0.00117295	0.146118	0.77	0.724	0.00332572
Smn1	0.00122416	0.146058	0.726	0.624	0.00340773
Spats2l	0.0205734	0.146028	0.532	0.468	0.0274984
Psmc3	0.00106696	0.145948	0.942	0.892	0.00312263
Nae1	0.00127253	0.145944	0.618	0.565	0.00349305
Sec61b	0.000104886	0.145862	0.989	0.976	0.000495936
H13	0.00202202	0.145538	0.825	0.738	0.00501977
Pno1	0.00274848	0.145478	0.393	0.284	0.00627129
Polr1c	0.00107625	0.14543	0.753	0.657	0.00314292
Raly	0.00157192	0.145302	0.914	0.876	0.00412042
Cdc27	0.00320772	0.145205	0.363	0.249	0.00703479
Trim28	0.000869008	0.145121	0.939	0.924	0.00266476
Eif4e	0.00110442	0.145023	0.809	0.7	0.00318666
Ctxn1	0.00416342	0.144928	0.859	0.803	0.0086329
Cyc1	0.0011858	0.144841	0.939	0.849	0.00333902
Psmd11	0.00109537	0.144769	0.864	0.808	0.0031759
Baz1b	0.00417796	0.144769	0.778	0.746	0.00865208
Topbp1	0.00158072	0.144709	0.515	0.427	0.00413107
E2f4	0.000751557	0.144426	0.471	0.357	0.00240616
Gfra1	0.037552	0.144301	0.488	0.43	0.0430109
Tbcb	0.00315993	0.144281	0.759	0.705	0.00697037
Pnkd	0.00113387	0.144033	0.731	0.643	0.00325441
Lbp	0.00956507	0.143997	0.335	0.251	0.0156495
Mrpl21	0.00169216	0.143994	0.859	0.811	0.00438032
Psmg3	0.00101688	0.143755	0.49	0.403	0.00299212
Sumo1	0.000220989	0.143679	0.97	0.957	0.000901591
Sorbs2	0.0154981	0.143665	0.349	0.265	0.0225601
Cby1	0.000839143	0.143594	0.507	0.416	0.00259516
Med16	0.00128193	0.143594	0.493	0.378	0.00350601
Gnb1	0.00641476	0.143585	0.864	0.816	0.0118049
Unc119	0.00121502	0.143519	0.748	0.673	0.0033979
Rdh10	0.00863455	0.143472	0.479	0.4	0.0145499
Gmnn	0.0292372	0.14347	0.349	0.241	0.0353004
Dhfr	0.0231864	0.143438	0.352	0.3	0.0299391
Psme2	0.00121455	0.14336	0.731	0.649	0.0033979
Mettl16	0.00129201	0.143272	0.62	0.511	0.00352288
Eef1akmt1	0.00173498	0.143231	0.618	0.514	0.00446293
Dus1l	0.00116143	0.143219	0.496	0.362	0.00330992
Sec11a	0.000889127	0.143175	0.925	0.914	0.0027189
Scd2	0.00492608	0.143063	0.812	0.735	0.009767
Ublcp1	0.00111889	0.143024	0.457	0.354	0.00322271
Hmcn1	0.0570545	0.143024	0.795	0.738	0.0621033
Tbpl1	0.00118484	0.142982	0.537	0.405	0.00333902
Emd	0.00369418	0.142895	0.579	0.516	0.00784893
Crnkl1	0.00157412	0.142844	0.429	0.292	0.00412042
Hmgcr	0.00514531	0.142844	0.38	0.303	0.0100211
Gnai2	0.00117587	0.142732	0.97	0.968	0.00332825
Dbnl	0.00147154	0.142701	0.701	0.6	0.00388923
Akap8	0.00240715	0.142563	0.634	0.543	0.00570738
Cct8	3.69e-05	0.14256	0.994	0.997	0.000213235
Ap2m1	0.00204691	0.142512	0.856	0.795	0.00505853
Gpaa1	0.00127153	0.142408	0.44	0.332	0.00349305
Txn1	0.000837056	0.142369	0.994	0.976	0.00259361
Sncaip	0.00261772	0.14229	0.742	0.714	0.00608322
Kpnb1	0.00181904	0.142276	0.737	0.67	0.00462822
Dbn1	0.00731396	0.142147	0.706	0.646	0.0128801
Cox5a	0.000934146	0.141994	0.989	0.981	0.00280371
Ctps	0.00125548	0.141855	0.546	0.441	0.00346954
Cdc25a	0.00745808	0.141761	0.385	0.265	0.0130497
Keap1	0.00162136	0.141734	0.593	0.514	0.00422381
Rnf168	0.00161992	0.141585	0.432	0.324	0.00422381
Aifm1	0.00182598	0.141479	0.687	0.541	0.00463147
Dnttip1	0.00171926	0.141372	0.681	0.627	0.00443645
Stt3a	0.00172916	0.141213	0.482	0.373	0.00445497
Ppid	0.00217704	0.141176	0.9	0.843	0.0052765
Siva1	0.00203181	0.141141	0.981	0.954	0.00503643
Kcnq1ot1	0.0039263	0.14107	0.994	0.962	0.00825633
Fzd4	0.00139354	0.141035	0.479	0.389	0.00373742
Pdrg1	0.00135906	0.140921	0.645	0.557	0.00366901
Tsnax	0.00180702	0.140918	0.69	0.624	0.00462642
Mrgbp	0.00242621	0.140908	0.44	0.316	0.00573595
Slbp	0.00247258	0.140789	0.759	0.697	0.00582873
Brd4	0.00314185	0.14076	0.767	0.7	0.00695543
Slc25a39	0.00175741	0.140734	0.873	0.824	0.00451074
Nme2	0.0125357	0.140422	0.307	0.195	0.0192148
Uba1	0.00394212	0.140269	0.709	0.67	0.00826969
Nsmce1	0.00228923	0.140181	0.742	0.643	0.00545149
Rars	0.00228684	0.140057	0.798	0.711	0.00545149
Phc2	0.00189589	0.139967	0.582	0.492	0.00476448
Mri1	0.00175908	0.139884	0.496	0.408	0.00451074
Eif1ad	0.00181676	0.139768	0.524	0.4	0.00462822
Traf2	0.0821583	0.139746	0.255	0.124	0.0871666
Col18a1	0.00121902	0.139729	0.515	0.381	0.00340327
Hat1	0.00242375	0.139722	0.69	0.632	0.00573595
Cenpx	0.00282928	0.139721	0.704	0.616	0.00642875
Timm17b	0.00249519	0.139534	0.723	0.641	0.00585386
Ccdc124	0.00203569	0.139516	0.668	0.565	0.00503841
Uchl3	0.00289556	0.139334	0.77	0.681	0.0065199
Rxrb	0.00145186	0.139302	0.554	0.462	0.00384966
Adsl	0.00332475	0.139302	0.535	0.424	0.00726207
Dph6	0.00128368	0.139228	0.479	0.395	0.00350601
Atic	0.00196125	0.139131	0.753	0.638	0.00487631
Magoh	0.00208775	0.139126	0.911	0.865	0.00509025
Hmgb1	0.00370986	0.13912	1	1	0.00786672
Ndufb7	0.00144138	0.139107	0.934	0.919	0.00382807
Lyar	0.00227228	0.139075	0.889	0.873	0.00544311
Npm3	0.0590273	0.138946	0.909	0.889	0.0639104
Ndufs3	0.00165304	0.138924	0.898	0.878	0.00429949
Pigt	0.00266283	0.138807	0.637	0.557	0.0061618
Mrpl27	0.00257649	0.138681	0.618	0.546	0.00599594
Sec62	0.00217002	0.138633	0.956	0.93	0.00526729
Flywch1	0.00146861	0.138403	0.488	0.373	0.00388777
Hnrnpk	0.000133276	0.138381	1	1	0.000605665
Ccne1	0.126959	0.138359	0.211	0.154	0.132381
Dnaja2	0.00208207	0.138352	0.928	0.889	0.00509025
Psmc1	0.00208135	0.138341	0.831	0.768	0.00509025
Hnrnpab	0.00183706	0.13823	0.975	0.968	0.00464518
Phf14	0.00109403	0.138175	0.898	0.876	0.0031759
Rtca	0.00251146	0.138149	0.474	0.346	0.00587805
Tcerg1	0.00493723	0.138058	0.795	0.732	0.009767
Wbp1	0.00612376	0.138044	0.695	0.641	0.0114106
Sdf4	0.00216652	0.137998	0.709	0.641	0.00526661
Son	0.000207744	0.137981	0.992	0.981	0.000867983
Mdh1	0.000777904	0.137881	0.975	0.943	0.00245685
Chd8	0.00424893	0.137761	0.657	0.551	0.00877682
Fam49b	0.00291834	0.13774	0.612	0.514	0.00655825
Sumo2	3.86e-06	0.137712	0.994	0.997	3.2e-05
Msh6	0.00525301	0.137702	0.471	0.335	0.0101944
Jund	0.0210018	0.137497	0.992	0.992	0.0279893
Cmtm3	0.0033557	0.13736	0.59	0.516	0.00730043
Crcp	0.00922402	0.137334	0.349	0.219	0.0152738
Psat1	0.0228403	0.137334	0.305	0.222	0.0296091
Rps21	1.51e-21	0.137272	1	1	1.45e-19
Calm2	0.000394532	0.137263	0.997	0.984	0.00143754
Hsph1	0.00940446	0.137254	0.435	0.368	0.0154693
Mlf2	0.0036161	0.137206	0.903	0.868	0.00772315
Pold2	0.00461587	0.137136	0.557	0.503	0.00930219
Yipf5	0.00248573	0.136879	0.632	0.524	0.0058513
Slc25a3	1.15e-06	0.136856	1	0.995	1.15e-05
Fen1	0.0186957	0.136837	0.324	0.235	0.0257849
Nedd8	0.000238814	0.136807	0.997	0.984	0.000957598
Gpx1	0.00219838	0.136685	0.909	0.849	0.00532035
Cops4	0.00227733	0.136595	0.903	0.835	0.00544311
Cfl2	0.00267955	0.136562	0.898	0.873	0.00619173
Bdp1	0.00207529	0.136526	0.618	0.53	0.00509025
Ppat	0.00207545	0.136524	0.568	0.446	0.00509025
Zfp467	0.00289729	0.136522	0.449	0.362	0.0065199
Ndufs4	0.00113382	0.136466	0.925	0.881	0.00325441
Ggnbp2	0.00596427	0.136428	0.704	0.662	0.0111291
Spr	0.00323218	0.136416	0.584	0.492	0.00707877
Mrpl13	0.00382223	0.136407	0.831	0.751	0.00804784
Gatd1	0.00181534	0.136288	0.573	0.435	0.00462822
Smdt1	0.00238221	0.136036	0.928	0.897	0.00566467
Ybx1	6.96e-05	0.13595	1	1	0.000361615
Tex30	0.0149397	0.135851	0.343	0.216	0.0219205
Smarcd3	0.00253132	0.135851	0.449	0.357	0.00591606
Mcrs1	0.00274218	0.135784	0.734	0.668	0.00626565
Prdm2	0.0045138	0.135752	0.427	0.338	0.00916201
Snx2	0.0115165	0.135724	0.723	0.638	0.0180852
Csnk1g2	0.00545887	0.135666	0.864	0.835	0.0104461
Psmd7	0.00136708	0.135644	0.972	0.932	0.00367854
Rbm6	0.00378499	0.135563	0.637	0.586	0.00797969
Smc6	0.00808564	0.135557	0.792	0.749	0.0138382
Fus	0.000333977	0.135477	0.989	0.968	0.00125031
Pcbp2	0.00109158	0.135417	0.975	0.968	0.0031759
Trp53bp2	0.00643381	0.135361	0.418	0.343	0.0118134
Eri1	0.00194997	0.135273	0.479	0.386	0.00486566
Rangap1	0.0204775	0.135214	0.335	0.259	0.0274375
Rpf1	0.00349982	0.135185	0.565	0.457	0.00751405
Cdk2ap2	0.00445576	0.135113	0.562	0.462	0.00911034
Ubqln2	0.00244151	0.135093	0.551	0.449	0.0057638
Casp6	0.00302148	0.135082	0.46	0.357	0.00672588
Atxn7l3b	0.00023074	0.135061	0.989	0.992	0.000934381
Armc1	0.00318663	0.134973	0.681	0.586	0.00700715
Ilf2	0.0014285	0.134896	0.942	0.924	0.00380003
Prdx5	0.00586205	0.134885	0.925	0.895	0.0109855
Kif5b	0.00614472	0.134859	0.934	0.884	0.0114366
Ppig	0.00447911	0.134818	0.961	0.914	0.00912977
Safb	0.00485299	0.134762	0.762	0.714	0.00965875
Hif1a	0.00936279	0.134651	0.717	0.638	0.0154411
Srsf11	0.00220612	0.134605	0.961	0.962	0.00532694
Tcf3	0.00318174	0.134529	0.834	0.8	0.00700582
Ctbp2	0.00442347	0.134465	0.587	0.468	0.00906867
Zfp638	0.011142	0.134416	0.806	0.749	0.0176631
Psmd12	0.0022512	0.134396	0.914	0.892	0.00540817
Emc10	0.00207424	0.134386	0.881	0.776	0.00509025
Cdc26	0.0022135	0.134373	0.884	0.811	0.00533326
Supt16	0.0109675	0.134271	0.914	0.884	0.0174202
Ube2i	0.000548443	0.134227	0.986	0.962	0.00187318
Calm3	0.00320779	0.134109	0.864	0.781	0.00703479
Sltm	0.00493471	0.134067	0.909	0.87	0.009767
Ctbp1	0.0033493	0.133952	0.848	0.797	0.00729622
Arhgdia	0.00732509	0.13389	0.825	0.814	0.0128859
Eif3g	0.00183587	0.133732	0.947	0.93	0.00464518
Sf3a1	0.00467709	0.133615	0.573	0.522	0.00938861
Ankrd10	0.00271016	0.133551	0.668	0.557	0.00624483
Itpa	0.00405391	0.133507	0.609	0.492	0.00845944
Ninj1	0.00996386	0.133488	0.388	0.3	0.0160758
Ahctf1	0.00559845	0.13341	0.485	0.411	0.0105519
Mrpl52	0.000665325	0.133371	0.978	0.968	0.0021726
AU019823	0.00272731	0.133106	0.524	0.397	0.00626565
Sh3gl1	0.00286584	0.133106	0.507	0.419	0.00649366
mt-Co3	1.93e-05	0.13309	1	1	0.000127558
Zdhhc20	0.00294123	0.133034	0.601	0.514	0.00659157
Dnajc3	0.00249755	0.13288	0.532	0.441	0.00585386
Stk4	0.00652481	0.132839	0.385	0.254	0.0119136
Nsmce4a	0.00353913	0.132814	0.848	0.795	0.00757855
Pdlim7	0.00268575	0.132699	0.474	0.365	0.00619731
Fasn	0.00453975	0.132474	0.474	0.373	0.00920325
Prpf40a	0.00281377	0.132463	0.939	0.916	0.00641131
Tecr	0.000775104	0.132274	0.986	0.978	0.00245275
Eif3a	0.00116333	0.132273	0.994	0.986	0.00330992
Acot1	0.00622053	0.132271	0.906	0.868	0.0115231
Fkbp4	0.00114145	0.132247	0.986	0.951	0.00327043
Mrpl20	0.00344248	0.132187	0.9	0.854	0.00742015
Mrpl45	0.0055135	0.132177	0.712	0.622	0.0104863
Uqcc2	0.011418	0.132057	0.698	0.627	0.0180134
Dnttip2	0.00409606	0.132011	0.873	0.792	0.0085365
Rfc3	0.00497796	0.131917	0.64	0.527	0.0098286
Hsbp1	0.00287786	0.131694	0.928	0.884	0.00650301
Egfl7	0.00262637	0.131624	0.501	0.359	0.00609467
Kti12	0.00411289	0.131329	0.543	0.435	0.00856068
Atrx	0.0071324	0.131273	0.975	0.965	0.0126766
Hnrnpa1	1.98e-05	0.131228	1	1	0.000130526
Naa15	0.00538579	0.131201	0.814	0.754	0.0103783
Sdhb	0.00255147	0.131065	0.936	0.859	0.00595464
Clns1a	0.00545931	0.131059	0.817	0.792	0.0104461
Kctd5	0.00713638	0.131005	0.371	0.27	0.0126766
Mak16	0.00550559	0.130992	0.618	0.541	0.0104863
Hnrnph2	0.00373017	0.130898	0.72	0.627	0.00788444
Rps27	5.67e-15	0.130862	1	1	3.2e-13
Snap47	0.0044173	0.130795	0.676	0.622	0.00906867
Carnmt1	0.00647194	0.13067	0.745	0.695	0.0118568
Bud23	0.00400049	0.130598	0.579	0.514	0.00835863
1700025G04Rik	0.00363585	0.130544	0.465	0.316	0.00775521
Gart	0.00642944	0.130537	0.67	0.522	0.0118134
Mapre1	0.00503042	0.130488	0.834	0.749	0.00990948
Fancl	0.0263807	0.130432	0.31	0.189	0.032996
Ppip5k2	0.0033389	0.13037	0.427	0.324	0.00728325
Abcg2	0.00492564	0.13037	0.432	0.289	0.009767
Arf4	0.00484834	0.130315	0.939	0.908	0.00965875
Cep290	0.0128288	0.130304	0.499	0.405	0.0195237
Ndufa9	0.00342602	0.130206	0.795	0.73	0.00739442
Ctnnb1	0.00347113	0.130197	0.97	0.957	0.00746225
Dync1li1	0.00302171	0.130171	0.449	0.346	0.00672588
Rnaseh2c	0.0157559	0.130168	0.825	0.759	0.0228314
Mrpl55	0.00310542	0.129986	0.573	0.478	0.00689343
Urod	0.00371217	0.129986	0.676	0.63	0.00786672
Snrpc	0.00560882	0.129906	0.886	0.881	0.0105593
Cald1	0.0230565	0.129895	0.825	0.792	0.0298285
Ctnnbip1	0.0226701	0.129666	0.792	0.751	0.0294585
Ptbp1	0.00512687	0.129613	0.853	0.803	0.010021
Cdc123	0.00636364	0.129612	0.706	0.651	0.0117372
Mea1	0.00548824	0.12956	0.637	0.584	0.010477
Sec13	0.00809425	0.129554	0.609	0.527	0.0138382
Nars	0.00398173	0.129528	0.9	0.797	0.00834074
Foxd1	0.0460638	0.129518	0.463	0.392	0.0509536
Rem1	0.0681039	0.129478	0.737	0.684	0.073061
Gtf2e2	0.00469918	0.129304	0.684	0.597	0.00942139
Ppp4c	0.0044926	0.12925	0.623	0.53	0.0091303
Med8	0.00427046	0.129104	0.648	0.557	0.00881018
Magt1	0.00498039	0.12908	0.601	0.497	0.0098286
Rbp1	0.0403674	0.128841	0.994	0.978	0.0456085
Manbal	0.00572812	0.128802	0.496	0.427	0.0107468
Echs1	0.00316138	0.128792	0.92	0.884	0.00697037
1700037H04Rik	0.00703165	0.128684	0.416	0.349	0.012561
Rnh1	0.0053984	0.128669	0.781	0.697	0.0103903
Eif2b3	0.00551875	0.128656	0.507	0.441	0.0104863
Snn	0.039305	0.128642	0.285	0.178	0.0445365
Isy1	0.00503348	0.128639	0.424	0.297	0.00990948
Arpc5l	0.00729432	0.128525	0.737	0.63	0.0128594
Ppp2r1a	0.00515575	0.128508	0.753	0.638	0.0100295
Rrp1	0.00194355	0.128494	0.956	0.959	0.00486184
Atp5o.1	0.00101976	0.128426	0.994	0.973	0.00299521
Sf3a2	0.00656716	0.128377	0.535	0.462	0.0119776
Hnrnpr	0.00120627	0.128314	0.964	0.973	0.00339081
Copb2	0.00513548	0.12831	0.889	0.849	0.0100211
Fth1	2.06e-05	0.128302	1	0.997	0.000133965
Phf20l1	0.00463361	0.128232	0.673	0.578	0.00932165
Pgrmc1	0.00809245	0.128194	0.886	0.838	0.0138382
Blmh	0.00440234	0.128181	0.884	0.824	0.0090594
Tmem9	0.00479645	0.128166	0.704	0.592	0.00958119
Ryk	0.0173596	0.128088	0.85	0.857	0.0243362
Sms	0.00893347	0.128035	0.828	0.786	0.0148679
H2-Eb1	0.13213	0.128023	0.235	0.165	0.137334
Api5	0.00637915	0.128003	0.634	0.578	0.0117526
Prpf19	0.00719998	0.127986	0.812	0.738	0.0127403
Pbdc1	0.00870205	0.127861	0.665	0.614	0.0146114
Iws1	0.0161362	0.127839	0.562	0.47	0.0230557
Cpsf3	0.0072918	0.127778	0.557	0.47	0.0128594
Rfc1	0.00770941	0.127775	0.845	0.814	0.0133326
Psma6	0.00356102	0.127552	0.961	0.905	0.00761546
Med21	0.00618859	0.127463	0.72	0.643	0.0114921
Naa10	0.00454726	0.127377	0.853	0.759	0.00920708
Trpc4ap	0.00472114	0.127355	0.582	0.495	0.00945003
Gtf2h5	0.00734101	0.127355	0.914	0.87	0.0128943
Ttyh3	0.00535598	0.127279	0.413	0.322	0.010333
Tor2a	0.00372108	0.127104	0.49	0.37	0.0078754
Plekhj1	0.00672875	0.127019	0.77	0.695	0.0122015
Mcfd2	0.0056455	0.127007	0.452	0.359	0.0106161
Thyn1	0.00660843	0.127007	0.729	0.659	0.0120394
Eif4ebp1	0.00965806	0.126997	0.825	0.751	0.0157348
Rcor1	0.00679823	0.126996	0.496	0.43	0.0122894
Zpr1	0.00530542	0.126946	0.609	0.514	0.0102718
A430005L14Rik	0.00554464	0.126926	0.557	0.446	0.0104989
Nol11	0.00623343	0.126904	0.64	0.562	0.0115231
Pin4	0.00843632	0.126789	0.731	0.643	0.0143024
Nubp1	0.00703294	0.126787	0.515	0.411	0.012561
Tcof1	0.00877847	0.126742	0.668	0.616	0.0146846
Ncam1	0.0113859	0.126698	0.975	0.949	0.0179801
Tcf12	0.00976126	0.126693	0.679	0.641	0.0158272
Ube2z	0.00522634	0.12659	0.449	0.319	0.0101547
Med19	0.00696279	0.126541	0.643	0.576	0.0124766
Pdzd11	0.0055863	0.126408	0.501	0.419	0.0105519
Mrpl38	0.00941771	0.126284	0.701	0.641	0.0154693
Cope	0.00966591	0.126261	0.906	0.854	0.0157348
Ppih	0.00628407	0.126258	0.587	0.478	0.0116035
Wtap	0.00691254	0.126213	0.612	0.489	0.0124274
Pih1d1	0.00740136	0.12615	0.537	0.462	0.0129643
Usp19	0.00514048	0.126068	0.609	0.492	0.0100211
Col3a1	0.0459139	0.126025	0.374	0.286	0.0508222
Gtf3c6	0.00812617	0.126003	0.778	0.754	0.0138628
Mmgt2	0.00838078	0.125959	0.551	0.489	0.0142378
Bsg	0.000508029	0.125919	0.992	0.989	0.00177593
Lbr	0.0451872	0.125896	0.288	0.159	0.0501195
Trmt1	0.00545445	0.125888	0.726	0.659	0.0104461
Eif3b	0.00566256	0.125865	0.864	0.786	0.010636
Cpsf6	0.0212927	0.12583	0.823	0.803	0.0281607
Rce1	0.00791303	0.125825	0.454	0.378	0.0136414
Park7	0.00137558	0.125806	0.986	0.978	0.00369533
Smad4	0.00880217	0.125762	0.784	0.735	0.0146942
Clspn	0.186395	0.125678	0.213	0.13	0.19047
Arpc2	0.00288408	0.125657	0.964	0.935	0.00650807
Tax1bp3	0.0048032	0.12558	0.468	0.365	0.00958296
Nsmce2	0.00591031	0.12552	0.712	0.589	0.0110506
Cdca7l	0.00672054	0.125457	0.388	0.297	0.0122015
Ccdc85b	0.00461698	0.125451	0.609	0.481	0.00930219
Phf20	0.00756375	0.125449	0.634	0.527	0.0132063
Fam192a	0.00716046	0.125411	0.684	0.595	0.0127055
Pspc1	0.00544704	0.125386	0.562	0.47	0.0104461
Atp5l	0.00078835	0.125376	0.994	0.989	0.00247551
Emc3	0.00511083	0.125166	0.579	0.478	0.0100016
Nsd2	0.00805413	0.125128	0.573	0.497	0.0138311
Cenpw	0.0174538	0.125035	0.601	0.538	0.0243846
Yap1	0.00528357	0.125033	0.521	0.43	0.0102416
Pet100	0.00503956	0.124954	0.681	0.603	0.00990952
Khdrbs1	0.00764294	0.124938	0.914	0.886	0.013302
Gtpbp4	0.0128904	0.124927	0.859	0.811	0.0195992
Moxd1	0.295949	0.124825	0.18	0.095	0.298504
Rtn4	0.0072363	0.124802	0.936	0.911	0.0127847
Mrps7	0.00707141	0.124759	0.792	0.768	0.0125885
Immp1l	0.00596588	0.124709	0.723	0.662	0.0111291
1700123O20Rik	0.0065127	0.124709	0.643	0.549	0.0119048
Casp8ap2	0.0512246	0.124709	0.537	0.478	0.0561686
Exosc10	0.00717128	0.124536	0.449	0.359	0.012711
Sf3b6	0.00551388	0.124418	0.947	0.892	0.0104863
Ufm1	0.00559209	0.124406	0.582	0.492	0.0105519
Tmed2	0.0070298	0.124375	0.939	0.905	0.012561
Bcl10	0.0116237	0.124268	0.557	0.497	0.0181969
Ube2h	0.0165928	0.124266	0.662	0.586	0.023509
Tmem222	0.00875308	0.124105	0.576	0.497	0.0146572
Cib1	0.00665256	0.124075	0.432	0.327	0.0120929
Chd4	0.00553079	0.124024	0.97	0.965	0.0104868
Rpl7l1	0.00809482	0.123998	0.881	0.827	0.0138382
Ndufa11	0.00783522	0.123936	0.939	0.932	0.0135358
Commd3	0.0106987	0.123893	0.889	0.811	0.0170762
Pdap1	0.00273978	0.123885	0.992	1	0.00626565
Ddx3x	0.0108631	0.12381	0.789	0.746	0.0172879
Minpp1	0.00794761	0.123805	0.576	0.451	0.0136866
Sulf2	0.0328565	0.123763	0.645	0.592	0.0387271
Cdk13	0.00458643	0.123745	0.584	0.478	0.00926345
Dpm2	0.00805688	0.123652	0.518	0.416	0.0138311
Brms1	0.0105758	0.123639	0.377	0.265	0.0169296
Nectin2	0.0701387	0.123565	0.629	0.581	0.0751061
Naa20	0.0131525	0.123529	0.684	0.659	0.0199052
Glrx5	0.00706528	0.123518	0.909	0.884	0.0125885
Ruvbl1	0.00412901	0.123471	0.92	0.884	0.00858331
Sf3a3	0.0133692	0.123412	0.792	0.743	0.0201214
Uchl1	0.031511	0.123324	0.33	0.219	0.037698
Ube2c	0.136315	0.123212	0.432	0.354	0.141325
Blvrb	0.0147579	0.123115	0.532	0.457	0.0217709
Ezh2	0.0116888	0.123095	0.803	0.792	0.0182342
Rad23a	0.00935745	0.123065	0.399	0.276	0.0154411
Prpf31	0.0145021	0.122878	0.695	0.673	0.02151
Cnot6	0.00913666	0.122871	0.695	0.632	0.0151444
Thoc3	0.00734567	0.12285	0.778	0.673	0.0128943
Dido1	0.00364178	0.122805	0.529	0.419	0.00775774
Slirp	0.00956572	0.122591	0.781	0.741	0.0156495
Rex1bd	0.0125814	0.122546	0.77	0.714	0.0192489
Smim8	0.0134363	0.122529	0.416	0.33	0.0201832
Dera	0.00911855	0.122468	0.637	0.503	0.0151298
Ywhag	0.014168	0.122396	0.607	0.559	0.0211101
Strap	0.00689995	0.12237	0.917	0.878	0.0124259
Ptp4a2	0.0211481	0.122343	0.848	0.819	0.0280524
Mfap2	0.0158078	0.122286	0.831	0.754	0.0228863
Morf4l1	0.00167856	0.122239	0.986	0.981	0.00435202
Lars	0.00865406	0.122235	0.704	0.619	0.0145659
Cog8	0.00693278	0.122224	0.504	0.454	0.0124364
Mtx1	0.00884536	0.122157	0.579	0.486	0.0147513
Arfgap2	0.00676494	0.122091	0.659	0.546	0.0122427
Yeats4	0.00839965	0.122051	0.817	0.776	0.014255
Fam216a	0.0104599	0.121999	0.64	0.557	0.0167768
Mybbp1a	0.00705255	0.121971	0.864	0.786	0.0125823
Ube2d3	0.00342278	0.121924	0.956	0.962	0.00739442
Ccser2	0.0323927	0.121868	0.316	0.211	0.038374
Gtf3a	0.00944839	0.121854	0.762	0.665	0.0155041
Zfp398	0.0256696	0.121789	0.357	0.259	0.032479
Chsy1	0.0231574	0.121708	0.332	0.222	0.0299254
Apoo	0.00827399	0.121501	0.485	0.403	0.0141003
Mbd3	0.0116917	0.121484	0.945	0.927	0.0182342
Chchd4	0.0122098	0.121475	0.615	0.565	0.0188624
Map1lc3a	0.0121014	0.121393	0.801	0.708	0.0187653
Cadm1	0.0212179	0.121381	0.676	0.638	0.0281072
Ywhae	0.00341507	0.121367	1	0.997	0.00739028
Eif4e2	0.00940833	0.121349	0.898	0.865	0.0154693
Chka	0.024515	0.121233	0.548	0.497	0.0314068
Ddx24	0.00684977	0.121231	0.903	0.873	0.0123689
Ndufb10	0.00759752	0.121223	0.981	0.943	0.0132511
Jam3	0.00766161	0.121191	0.601	0.503	0.0133051
Efnb1	0.0263216	0.12118	0.612	0.535	0.0329937
Arglu1	0.00963011	0.121017	0.978	0.932	0.0157077
Psma5	0.00222611	0.120926	0.978	0.97	0.00535576
Tpp2	0.00787982	0.120924	0.535	0.481	0.0135985
Rsl1d1	0.00346143	0.120882	0.961	0.962	0.00745117
Uqcr10	0.00510999	0.120853	0.97	0.965	0.0100016
Bad	0.00880025	0.120599	0.626	0.549	0.0146942
Gnai3	0.0107269	0.120574	0.748	0.741	0.0170878
Lims1	0.00769903	0.120507	0.551	0.457	0.0133287
Gpr180	0.0204752	0.120484	0.357	0.278	0.0274375
Usp34	0.0118094	0.120448	0.839	0.781	0.0183477
Tmem50a	0.0106957	0.120438	0.873	0.832	0.0170762
Knop1	0.00798708	0.120326	0.92	0.905	0.0137401
Dnajc2	0.0126548	0.120267	0.853	0.822	0.0193308
Plgrkt	0.00735388	0.120244	0.507	0.438	0.0128949
Wsb1	0.0159878	0.120199	0.601	0.511	0.0230082
Csnk1d	0.0110102	0.120182	0.668	0.584	0.0174711
Tmem256	0.0104482	0.120157	0.881	0.849	0.0167745
Slc35a4	0.00623252	0.120098	0.482	0.373	0.0115231
Ppp2ca	0.00766913	0.120045	0.956	0.93	0.0133051
Tcp1	0.00147414	0.120035	0.989	0.986	0.00388983
Nup43	0.00960244	0.119784	0.507	0.427	0.0156782
Hoxc8	0.100224	0.11978	0.803	0.776	0.105309
Nf1	0.00951809	0.119761	0.438	0.322	0.0156028
Lactb	0.0412046	0.11975	0.341	0.235	0.0463623
Ncbp2	0.0131335	0.119731	0.751	0.686	0.0199052
Chaf1a	0.0786306	0.119573	0.335	0.23	0.0836408
Paics	0.00508964	0.119569	0.964	0.946	0.009984
Gosr2	0.154455	0.119514	0.249	0.143	0.159123
Myl12a	0.0211576	0.119441	0.911	0.849	0.0280524
Zfp507	0.00863566	0.119414	0.427	0.324	0.0145499
Nr2f2	0.0388569	0.119381	0.989	0.978	0.044238
Lama5	0.0998981	0.119319	0.274	0.178	0.105034
Pin1	0.0115188	0.119279	0.859	0.814	0.0180852
Anp32e	0.0824471	0.119258	0.834	0.827	0.0874164
Map1b	0.213356	0.119258	0.535	0.522	0.217071
Mrpl12	0.00838075	0.119213	0.925	0.892	0.0142378
Ndufa12	0.00871603	0.119187	0.95	0.946	0.0146114
Prmt5	0.0152986	0.119184	0.609	0.557	0.0223669
Ppib	0.000914415	0.119144	0.997	0.997	0.00276522
Atg4b	0.00969839	0.119069	0.432	0.319	0.0157563
Ndufa10	0.00589047	0.119062	0.947	0.914	0.0110261
Grpel1	0.00811205	0.118996	0.878	0.849	0.0138531
Nsrp1	0.0359223	0.118955	0.803	0.751	0.0413975
Dcaf13	0.017999	0.118954	0.468	0.378	0.0249546
B3gat3	0.0121915	0.118936	0.454	0.346	0.0188519
Ehmt1	0.0172698	0.118936	0.759	0.678	0.0242311
Stub1	0.0165971	0.118928	0.922	0.886	0.023509
2010107E04Rik	0.00273608	0.118875	0.981	0.951	0.00626565
Lig1	0.0584867	0.118747	0.479	0.441	0.0634511
Anapc4	0.00987447	0.118738	0.526	0.454	0.0159789
Atpif1	0.00130134	0.118651	1	0.997	0.00354243
Sipa1l1	0.0254789	0.118628	0.778	0.722	0.0322628
Mageh1	0.0131928	0.118617	0.601	0.543	0.0199477
Tceal8	0.0158403	0.11855	0.765	0.765	0.0229125
Espn	0.109371	0.118353	0.801	0.757	0.114626
Sh3bgrl3	0.0116424	0.118311	0.828	0.759	0.0181969
Puf60	0.00692619	0.118253	0.92	0.916	0.0124364
Eif4g1	0.0458307	0.118151	0.82	0.811	0.0507988
Nup85	0.0858132	0.118111	0.28	0.184	0.0906915
Taf1d	0.0125236	0.118092	0.97	0.941	0.0192148
Rbm8a	0.0067347	0.118081	0.95	0.938	0.0122015
Csnk1a1	0.00531172	0.118047	0.994	0.986	0.0102718
Cxxc1	0.00995862	0.117992	0.471	0.395	0.0160758
Akr1a1	0.00646509	0.117982	0.989	0.97	0.0118568
Brd1	0.0123102	0.117926	0.803	0.743	0.0189816
Mphosph10	0.0313906	0.117892	0.637	0.595	0.0376504
Gna11	0.0163501	0.117874	0.684	0.67	0.0232801
Ing1	0.0392719	0.117798	0.679	0.643	0.0445365
Surf4	0.0157556	0.117749	0.551	0.489	0.0228314
Mrps33	0.00769537	0.117715	0.939	0.93	0.0133287
Polr3k	0.011557	0.117715	0.676	0.624	0.0181278
Srrm1	0.0100189	0.117647	0.947	0.916	0.0161487
Hsd17b10	0.00443875	0.117533	0.958	0.943	0.00908861
Paip2	0.00449258	0.117519	0.989	0.973	0.0091303
Lage3	0.0116219	0.117511	0.823	0.776	0.0181969
Actr2	0.0152239	0.117475	0.44	0.381	0.0222776
Ggps1	0.0117229	0.117456	0.402	0.292	0.0182654
Dgcr6	0.0124113	0.117407	0.812	0.738	0.0191014
Ubtd1	0.0358562	0.117367	0.546	0.489	0.0413686
Mut	0.00845467	0.117334	0.435	0.319	0.0143187
Spc24	0.119473	0.117302	0.288	0.211	0.124893
Cisd1	0.0159692	0.117153	0.795	0.743	0.0230082
Smco4	0.0164464	0.117148	0.657	0.619	0.0233968
Pole3	0.0140542	0.117108	0.701	0.654	0.0209596
1810058I24Rik	0.0109231	0.116998	0.881	0.865	0.0173665
Ash2l	0.0126984	0.116965	0.789	0.724	0.0193475
Virma	0.00906043	0.116948	0.499	0.392	0.0150486
Mapk12	0.070148	0.116934	0.288	0.203	0.0751061
Ube2j2	0.0125894	0.116875	0.654	0.578	0.0192489
Glo1	0.00993427	0.116852	0.837	0.773	0.0160597
Dnpep	0.0160269	0.116845	0.665	0.597	0.0230202
Mrpl22	0.0105569	0.116786	0.651	0.559	0.0169159
Sgta	0.0132466	0.116771	0.845	0.784	0.0199855
Chaf1b	0.0503918	0.116771	0.363	0.3	0.0552924
Dnm2	0.0525714	0.11674	0.319	0.181	0.0575296
Gadd45gip1	0.0137063	0.11662	0.781	0.732	0.0205344
Axin1	0.0134064	0.116602	0.41	0.308	0.0201589
Nisch	0.0179821	0.116598	0.942	0.935	0.0249546
Stard3	0.00938304	0.116586	0.499	0.4	0.0154589
Rae1	0.0168047	0.116548	0.773	0.708	0.0237109
Ptov1	0.00130898	0.116528	0.997	0.992	0.00355728
Med25	0.0121126	0.116518	0.535	0.47	0.0187653
Mrps18b	0.0138732	0.116459	0.557	0.514	0.0207274
Klhdc4	0.0114843	0.116433	0.416	0.327	0.0180657
Rtf2	0.0123098	0.116433	0.596	0.527	0.0189816
Clk1	0.0121858	0.116397	0.909	0.881	0.0188519
Ppm1g	0.0282321	0.116356	0.812	0.724	0.03452
Prdx3	0.0123442	0.116255	0.726	0.651	0.0190161
Topors	0.0351482	0.11625	0.709	0.662	0.0407958
Trabd	0.0124895	0.116214	0.465	0.389	0.0191857
Farsb	0.0120075	0.116192	0.593	0.495	0.0186378
Col4a1	0.0212441	0.116192	0.864	0.786	0.0281193
Prkra	0.0146282	0.116163	0.765	0.665	0.0216007
Qtrt1	0.0135732	0.116152	0.551	0.441	0.0203536
Ap2a1	0.0106645	0.116147	0.49	0.386	0.0170548
Eif1ax	0.0112391	0.116125	0.914	0.914	0.0177826
Cd81	0.00663451	0.116094	0.942	0.927	0.0120735
Ythdf1	0.0155333	0.116045	0.598	0.576	0.0225688
Impdh2	0.00457084	0.115883	0.975	0.957	0.00924337
Trappc5	0.0132544	0.115865	0.565	0.489	0.0199855
Phlda1	0.0855135	0.115856	0.518	0.411	0.0904916
Gja1	0.0161265	0.115815	0.427	0.359	0.0230557
Ctsd	0.0165696	0.115811	0.812	0.768	0.023509
Cdkn1c	0.183602	0.115779	0.884	0.873	0.187896
Rpusd4	0.0198361	0.115777	0.366	0.254	0.0268641
Robo2	0.23181	0.115761	0.884	0.878	0.234824
Gtf2i	0.0188948	0.115671	0.845	0.816	0.0258676
Cebpz	0.0270625	0.115597	0.87	0.8	0.033643
Psmd8	0.008707	0.115567	0.958	0.903	0.0146114
Luc7l	0.0195999	0.115493	0.712	0.676	0.0266463
Amer1	0.0114564	0.115444	0.485	0.384	0.0180392
Ncl	0.00690412	0.11542	1	1	0.0124259
Mindy3	0.14271	0.115409	0.28	0.216	0.147581
Hist1h2bc	0.36396	0.115395	0.424	0.351	0.365299
Rbbp4	0.0130597	0.115367	0.939	0.927	0.0198197
Cox6b1	0.00376918	0.115342	0.986	0.992	0.00795661
Dkc1	0.0168716	0.11533	0.889	0.832	0.0237743
Supt6	0.0253437	0.115302	0.731	0.697	0.0321376
C2cd4a	0.555149	0.115262	0.114	0.049	0.555488
Stk16	0.018888	0.115243	0.637	0.622	0.0258676
Prpsap1	0.0114295	0.115201	0.709	0.614	0.0180141
Slc25a17	0.0155175	0.115153	0.626	0.554	0.0225659
Ccdc12	0.0167051	0.115099	0.801	0.746	0.0236211
Sf3b1	0.00958452	0.115065	0.983	0.973	0.0156646
Comt	0.0278989	0.11506	0.626	0.549	0.0342405
Taf3	0.0126753	0.115053	0.471	0.376	0.019344
Mettl6	0.0260317	0.115009	0.388	0.322	0.0327095
Ptges3	0.0174314	0.114983	0.903	0.859	0.0243846
[truncated: 517 more rows]

## Sheet: Cluster5_MutVsCTRL.DEGs
Gene	p_val	avg_logFC	pct.1	pct.2	p_val_adj
[truncated: 3,708 more rows]

## Sheet: Cluster6_MutVsCTRL.DEGs
Gene	p_val	avg_logFC	pct.1	pct.2	p_val_adj
[truncated: 7,271 more rows]

[truncated: 17 more sheets: Cluster7_MutVsCTRL.DEGs, Cluster8_MutVsCTRL.DEGs, Cluster9_MutVsCTRL.DEGs, Cluster10_MutVsCTRL.DEGs, Cluster11.MutVsCTRL.DEGs, Cluster12.MutVsCTRL.DEGs, Cluster13.MutVsCTRL.DEGs, Cluster14.MutVsCTRL.DEGs, Cluster15.MutVsCTRL.DEGs, Cluster16.MutVsCTRL.DEGs, Cluster17.MutVsCTRL.DEGs, Cluster18.MutVsCTRL.DEGs, Cluster19.MutVsCTRL.DEGs, Cluster20.MutVsCTRL.DEGs, Cluster21.MutVsCTRL.DEGs, Cluster22.MutVsCTRL.DEGs, Cluster23.MutVsCTRL.DEGs]
