# Supplementary material for: Smarca4 deficiency induces Pttg1 oncogene upregulation and hyperproliferation of tubular and interstitial cells during kidney development
Source: Front Cell Dev Biol. 2023 Sep 4;11:1233317. doi: 10.3389/fcell.2023.1233317 (PMC10506413; doi:10.3389/fcell.2023.1233317)
Supplement: Supplementary file 2 [file Table3.XLSX]

## Sheet: Stroma_Subcluster.0.Mut.CTRL.m
Gene	CTRL_p_val	CTRL_avg_logFC	CTRL_pct.1	CTRL_pct.2	CTRL_p_val_adj	Mutant_p_val	Mutant_avg_logFC	Mutant_pct.1	Mutant_pct.2	Mutant_p_val_adj	max_pval	minimump_p_val
Spc24	6.23587e-141	1.01782	0.898	0.228	1.19567e-136	1.20452e-266	1.00948	0.958	0.311	2.30954e-262	6.23587e-141	2.40904e-266
Pclaf	8.19235e-156	1.42249	0.969	0.301	1.5708e-151	8.34942e-262	1.31013	0.982	0.392	1.60092e-257	8.19235e-156	1.66988e-261
Spc25	3.15658e-131	0.975839	0.856	0.212	6.05243e-127	3.86225e-258	0.998878	0.898	0.229	7.40548e-254	3.15658e-131	7.7245e-258
Hmgb2	6.64782e-141	1.54155	1	0.843	1.27465e-136	1.87136e-254	1.4637	1	0.857	3.58815e-250	6.64782e-141	3.74273e-254
Smc2	1.02987e-135	1.04273	0.946	0.321	1.97467e-131	1.15726e-244	1.03455	0.968	0.389	2.21893e-240	1.02987e-135	2.31452e-244
Ccna2	3.4123e-138	0.901969	0.793	0.127	6.54275e-134	4.43689e-241	0.873081	0.851	0.182	8.5073e-237	3.4123e-138	8.87379e-241
Aurkb	4.02468e-122	0.789197	0.68	0.093	7.71692e-118	2.5244e-239	0.805193	0.756	0.125	4.84028e-235	4.02468e-122	5.04879e-239
Top2a	4.51511e-153	1.59428	0.909	0.233	8.65727e-149	4.3059e-239	1.48703	0.9	0.312	8.25613e-235	4.51511e-153	8.6118e-239
Birc5	8.33054e-132	1.28354	0.864	0.241	1.5973e-127	3.7838e-232	1.18969	0.921	0.316	7.25505e-228	8.33054e-132	7.56759e-232
Kif22	5.8281e-113	0.702031	0.68	0.109	1.11748e-108	2.75046e-229	0.714242	0.774	0.138	5.27374e-225	5.8281e-113	5.50093e-229
Cdca8	2.85213e-132	1.01358	0.839	0.173	5.46867e-128	1.56206e-227	0.999303	0.86	0.227	2.99509e-223	2.85213e-132	3.12412e-227
Pbk	2.01819e-113	0.627784	0.652	0.09	3.86968e-109	5.71895e-227	0.624552	0.742	0.115	1.09655e-222	2.01819e-113	1.14379e-226
Mki67	2.58579e-137	1.22695	0.85	0.193	4.958e-133	5.09506e-225	1.19975	0.869	0.264	9.76927e-221	2.58579e-137	1.01901e-224
Cdk1	6.40565e-136	1.12109	0.929	0.305	1.22822e-131	7.10488e-224	1.12539	0.935	0.401	1.36229e-219	6.40565e-136	1.42098e-223
Smc4	2.97252e-119	1.09844	0.96	0.485	5.69951e-115	9.84278e-223	1.02483	0.977	0.534	1.88726e-218	2.97252e-119	1.96856e-222
Ckap2l	1.1717e-121	0.698126	0.683	0.092	2.24663e-117	3.75904e-222	0.700325	0.754	0.128	7.20757e-218	1.1717e-121	7.51807e-222
Sgo2a	8.85796e-107	0.609888	0.603	0.075	1.69843e-102	1.00636e-221	0.637869	0.697	0.102	1.92959e-217	8.85796e-107	2.01272e-221
Knl1	9.23579e-129	0.69431	0.683	0.078	1.77087e-124	5.51085e-221	0.64751	0.724	0.116	1.05665e-216	9.23579e-129	1.10217e-220
Shcbp1	2.14647e-103	0.54616	0.663	0.109	4.11564e-99	6.30766e-217	0.567221	0.765	0.142	1.20943e-212	2.14647e-103	1.26153e-216
Sgo1	1.31542e-131	0.635697	0.688	0.078	2.52218e-127	3.9666e-216	0.595996	0.715	0.116	7.60556e-212	1.31542e-131	7.9332e-216
Fbxo5	1.70721e-118	0.762051	0.7	0.111	3.27341e-114	4.50944e-216	0.721773	0.753	0.147	8.6464e-212	1.70721e-118	9.01888e-216
Hmmr	6.31556e-122	0.817973	0.671	0.08	1.21095e-117	4.23139e-214	0.852792	0.721	0.124	8.11326e-210	6.31556e-122	8.46278e-214
Kif15	1.11595e-122	0.63728	0.694	0.094	2.13972e-118	1.41826e-212	0.590513	0.728	0.123	2.71937e-208	1.11595e-122	2.83652e-212
Incenp	6.04639e-117	0.752366	0.72	0.125	1.15933e-112	1.01848e-210	0.752902	0.769	0.165	1.95282e-206	6.04639e-117	2.03695e-210
Ndc80	5.52624e-123	0.576313	0.632	0.063	1.0596e-118	4.9953e-210	0.543417	0.689	0.101	9.57799e-206	5.52624e-123	9.9906e-210
Racgap1	1.45389e-109	0.694856	0.731	0.143	2.78768e-105	1.38649e-206	0.739479	0.801	0.19	2.65845e-202	1.45389e-109	2.77298e-206
Nusap1	2.24289e-114	1.15954	0.722	0.14	4.30052e-110	2.15843e-206	1.0836	0.751	0.167	4.13858e-202	2.24289e-114	4.31686e-206
Kif23	3.62258e-108	0.67138	0.623	0.084	6.94593e-104	3.2251e-205	0.731092	0.695	0.118	6.1838e-201	3.62258e-108	6.4502e-205
Tuba1b	1.01012e-119	0.932062	1	0.895	1.93681e-115	1.39494e-204	0.781823	0.995	0.94	2.67465e-200	1.01012e-119	2.78988e-204
Kif11	5.98679e-117	0.636983	0.649	0.078	1.14791e-112	2.46811e-203	0.613371	0.651	0.093	4.73235e-199	5.98679e-117	4.93622e-203
Tpx2	2.5368e-116	0.957249	0.759	0.156	4.86407e-112	1.10573e-202	0.906677	0.781	0.184	2.12013e-198	2.5368e-116	2.21146e-202
Prc1	4.83686e-127	1.00915	0.728	0.108	9.27419e-123	1.88751e-202	0.960757	0.742	0.155	3.61911e-198	4.83686e-127	3.77502e-202
Cks2	1.73689e-119	1.20139	0.892	0.307	3.33032e-115	2.09906e-201	1.12262	0.93	0.399	4.02473e-197	1.73689e-119	4.19811e-201
Pimreg	2.5195e-102	0.598156	0.595	0.079	4.83089e-98	4.76071e-199	0.656718	0.677	0.108	9.12818e-195	2.5195e-102	9.52141e-199
H2afx	2.03406e-113	1.31039	0.943	0.49	3.90011e-109	2.2779e-197	1.23218	0.965	0.582	4.36764e-193	2.03406e-113	4.5558e-197
Lmnb1	2.13346e-107	0.923346	0.977	0.583	4.09069e-103	3.67441e-196	0.859363	0.989	0.685	7.04531e-192	2.13346e-107	7.34881e-196
Cks1b	1.68787e-116	0.911853	0.975	0.613	3.23632e-112	1.28692e-195	0.776127	0.991	0.72	2.46754e-191	1.68787e-116	2.57384e-195
Hist1h1b	9.10475e-97	1.53431	0.776	0.237	1.74574e-92	2.54409e-195	1.60659	0.827	0.27	4.87805e-191	9.10475e-97	5.08819e-195
Ncapg	1.1299e-104	0.432107	0.586	0.065	2.16648e-100	4.46698e-195	0.488097	0.677	0.109	8.56498e-191	1.1299e-104	8.93396e-195
Kif20b	1.19935e-104	0.658836	0.637	0.097	2.29963e-100	2.95674e-194	0.639246	0.701	0.132	5.66925e-190	1.19935e-104	5.91347e-194
Mxd3	2.08023e-112	0.54842	0.623	0.073	3.98862e-108	1.29276e-193	0.536395	0.651	0.098	2.47874e-189	2.08023e-112	2.58552e-193
Cdca2	3.45354e-100	0.458616	0.547	0.057	6.62181e-96	1.049e-191	0.480258	0.598	0.074	2.01134e-187	3.45354e-100	2.09799e-191
Ran	4.90551e-107	0.729804	1	0.956	9.40583e-103	2.37366e-191	0.682776	1	0.969	4.55125e-187	4.90551e-107	4.74731e-191
Hist1h2ap	1.59776e-101	1.96535	0.83	0.297	3.06354e-97	2.47484e-191	2.05953	0.95	0.534	4.74525e-187	1.59776e-101	4.94967e-191
Tyms	5.66124e-104	0.931495	0.856	0.317	1.08549e-99	8.09586e-191	0.977819	0.923	0.43	1.5523e-186	5.66124e-104	1.61917e-190
Tk1	1.46883e-99	0.593658	0.629	0.099	2.81633e-95	9.62193e-191	0.634363	0.734	0.148	1.84491e-186	1.46883e-99	1.92439e-190
Melk	2.4309e-108	0.480855	0.62	0.076	4.66101e-104	4.04644e-190	0.478649	0.684	0.118	7.75864e-186	2.4309e-108	8.09287e-190
Dbf4	1.20746e-96	0.558693	0.643	0.111	2.31518e-92	2.39617e-188	0.580853	0.745	0.166	4.59442e-184	1.20746e-96	4.79235e-188
Cenpe	2.12809e-107	0.948411	0.731	0.154	4.08039e-103	3.28886e-187	0.959814	0.777	0.202	6.30606e-183	2.12809e-107	6.57772e-187
Kif4	2.98601e-103	0.498702	0.589	0.074	5.72537e-99	3.77781e-187	0.460921	0.628	0.09	7.24357e-183	2.98601e-103	7.55561e-187
Rad51ap1	3.66493e-104	0.487834	0.618	0.084	7.02715e-100	7.6243e-184	0.496303	0.693	0.131	1.46188e-179	3.66493e-104	1.52486e-183
Mis18bp1	2.54059e-114	0.581866	0.623	0.073	4.87133e-110	5.37536e-183	0.578721	0.639	0.107	1.03067e-178	2.54059e-114	1.07507e-182
Cenpm	1.62135e-117	0.651631	0.841	0.196	3.10878e-113	6.8982e-183	0.587831	0.847	0.252	1.32266e-178	1.62135e-117	1.37964e-182
Dek	6.0055e-108	0.872559	0.994	0.844	1.1515e-103	1.64543e-182	0.791362	0.994	0.878	3.15495e-178	6.0055e-108	3.29086e-182
Rrm2	1.16229e-90	0.636832	0.66	0.135	2.22857e-86	6.61672e-181	0.705706	0.747	0.179	1.26869e-176	1.16229e-90	1.32334e-180
H2afz	1.64648e-103	0.823978	1	0.988	3.15696e-99	2.40132e-180	0.815404	1	0.988	4.60429e-176	1.64648e-103	4.80264e-180
Ccnb1	2.86388e-95	0.926587	0.635	0.114	5.4912e-91	2.00347e-178	0.926291	0.719	0.169	3.84145e-174	2.86388e-95	4.00694e-178
Hist1h2ae	2.50872e-88	1.44031	0.725	0.22	4.81023e-84	2.23652e-178	1.64337	0.816	0.293	4.28831e-174	2.50872e-88	4.47305e-178
Gmnn	2.45236e-83	0.599701	0.745	0.217	4.70216e-79	1.39796e-175	0.611456	0.866	0.286	2.68046e-171	2.45236e-83	2.79593e-175
Tmpo	2.76801e-87	0.732967	0.952	0.606	5.30738e-83	1.77616e-175	0.69117	0.98	0.666	3.4056e-171	2.76801e-87	3.55231e-175
Tubb5	4.24807e-99	0.760243	1	0.997	8.14524e-95	1.55203e-174	0.65134	1	0.997	2.97586e-170	4.24807e-99	3.10406e-174
Cenpf	1.9991e-108	1.29078	0.759	0.168	3.83307e-104	3.83682e-174	1.27334	0.78	0.231	7.35672e-170	1.9991e-108	7.67364e-174
Bub1	4.54615e-105	0.460294	0.606	0.076	8.71679e-101	8.98557e-174	0.470354	0.645	0.116	1.72289e-169	4.54615e-105	1.79711e-173
Plk4	2.02217e-85	0.450454	0.68	0.15	3.87731e-81	1.28974e-173	0.46726	0.734	0.17	2.47294e-169	2.02217e-85	2.57947e-173
Plk1	2.97604e-88	0.52824	0.533	0.071	5.70626e-84	5.9062e-173	0.656853	0.627	0.111	1.13245e-168	2.97604e-88	1.18124e-172
Ube2s	1.15463e-96	0.926721	0.992	0.866	2.2139e-92	7.23514e-172	0.821616	1	0.905	1.38727e-167	1.15463e-96	1.44703e-171
Nuf2	3.22329e-99	0.495297	0.606	0.083	6.18033e-95	5.43963e-171	0.469439	0.648	0.116	1.04299e-166	3.22329e-99	1.08793e-170
Ube2c	3.13274e-95	1.44598	0.79	0.26	6.00671e-91	2.45203e-170	1.40622	0.83	0.306	4.70153e-166	3.13274e-95	4.90407e-170
Hmgb1	6.5061e-89	0.578984	1	0.997	1.24748e-84	2.75258e-170	0.567138	1	0.997	5.27779e-166	6.5061e-89	5.50515e-170
Ptma	6.81209e-87	0.44632	1	1	1.30615e-82	3.81027e-170	0.500247	1	1	7.30581e-166	6.81209e-87	7.62054e-170
Ska1	2.15417e-98	0.388644	0.541	0.057	4.1304e-94	3.29541e-169	0.370807	0.598	0.09	6.31862e-165	2.15417e-98	6.59082e-169
Cenph	4.31817e-86	0.463464	0.606	0.105	8.27965e-82	1.10335e-168	0.476202	0.707	0.151	2.11556e-164	4.31817e-86	2.2067e-168
Esco2	7.87419e-113	0.491542	0.552	0.043	1.5098e-108	1.57056e-168	0.480164	0.563	0.077	3.01139e-164	7.87419e-113	3.14112e-168
Depdc1a	8.53292e-92	0.419687	0.524	0.059	1.6361e-87	2.09512e-168	0.460411	0.563	0.078	4.01718e-164	8.53292e-92	4.19024e-168
Tacc3	1.1236e-98	0.687753	0.714	0.151	2.15438e-94	9.51349e-167	0.662612	0.751	0.199	1.82412e-162	1.1236e-98	1.9027e-166
Anln	5.04817e-99	0.464786	0.603	0.08	9.67937e-95	3.21117e-166	0.452324	0.633	0.112	6.1571e-162	5.04817e-99	6.42234e-166
Clspn	1.14744e-91	0.547221	0.663	0.131	2.20009e-87	3.89964e-166	0.566381	0.706	0.164	7.47718e-162	1.14744e-91	7.79929e-166
Hjurp	1.64288e-104	0.815519	0.87	0.303	3.15006e-100	9.64735e-166	0.682587	0.888	0.39	1.84978e-161	1.64288e-104	1.92947e-165
Cenpq	4.43593e-109	0.5559	0.68	0.111	8.50546e-105	2.06921e-165	0.452369	0.71	0.163	3.9675e-161	4.43593e-109	4.13841e-165
Cenpk	1.86969e-119	0.554675	0.785	0.137	3.58494e-115	1.23929e-164	0.507997	0.753	0.193	2.37621e-160	1.86969e-119	2.47857e-164
Aurka	2.63176e-89	0.502657	0.501	0.056	5.04614e-85	2.58988e-163	0.582528	0.574	0.093	4.96583e-159	2.63176e-89	5.17975e-163
Stmn1	4.2046e-100	0.960206	0.992	0.862	8.06189e-96	4.36268e-163	0.781469	1	0.949	8.365e-159	4.2046e-100	8.72536e-163
Asf1b	1.34346e-76	0.326631	0.462	0.058	2.57595e-72	6.20949e-162	0.355069	0.589	0.094	1.19061e-157	1.34346e-76	1.2419e-161
Hist1h2ab	3.08365e-69	0.349585	0.416	0.051	5.9126e-65	2.14909e-161	0.543157	0.542	0.078	4.12067e-157	3.08365e-69	4.29819e-161
Kif2c	2.04694e-89	0.423958	0.504	0.056	3.92481e-85	7.54309e-161	0.505639	0.572	0.09	1.44631e-156	2.04694e-89	1.50862e-160
Neil3	1.15514e-81	0.390048	0.487	0.06	2.21487e-77	2.88473e-159	0.383466	0.549	0.08	5.53118e-155	1.15514e-81	5.76946e-159
Ttk	1.4559e-73	0.32564	0.439	0.052	2.79154e-69	8.82239e-157	0.339181	0.534	0.076	1.69161e-152	1.4559e-73	1.76448e-156
Ect2	5.73561e-70	0.294908	0.433	0.054	1.09975e-65	1.48817e-156	0.346935	0.528	0.071	2.85341e-152	5.73561e-70	2.97633e-156
Cdc20	1.07654e-86	0.988318	0.632	0.132	2.06415e-82	1.73926e-156	1.00303	0.71	0.195	3.33486e-152	1.07654e-86	3.47852e-156
Ckap2	7.60319e-91	0.587792	0.615	0.108	1.45784e-86	7.3571e-154	0.548401	0.668	0.151	1.41065e-149	7.60319e-91	1.47142e-153
Cdca3	8.81303e-94	0.602264	0.708	0.152	1.68981e-89	4.12955e-153	0.616867	0.741	0.211	7.91801e-149	8.81303e-94	8.25911e-153
Selenoh	9.83918e-85	0.700106	0.986	0.76	1.88656e-80	1.4687e-152	0.613174	0.992	0.845	2.81608e-148	9.83918e-85	2.9374e-152
Aspm	6.55792e-80	0.475347	0.473	0.057	1.25742e-75	4.61324e-148	0.497538	0.542	0.088	8.84542e-144	6.55792e-80	9.22647e-148
Rrm1	1.25916e-78	0.60616	0.773	0.266	2.41432e-74	8.87588e-148	0.577594	0.873	0.355	1.70186e-143	1.25916e-78	1.77518e-147
Dlgap5	1.66334e-97	0.46074	0.572	0.071	3.18929e-93	1.41572e-145	0.437466	0.572	0.105	2.7145e-141	1.66334e-97	2.83144e-145
Ccdc34	1.48954e-78	0.68788	0.977	0.706	2.85604e-74	5.35367e-144	0.641885	0.986	0.756	1.02651e-139	1.48954e-78	1.07073e-143
Spdl1	2.90717e-68	0.301785	0.419	0.052	5.57421e-64	2.43168e-143	0.338627	0.516	0.08	4.6625e-139	2.90717e-68	4.86336e-143
Trip13	2.86354e-83	0.409425	0.618	0.118	5.49055e-79	3.30391e-143	0.408459	0.693	0.174	6.33491e-139	2.86354e-83	6.60782e-143
Mad2l1	2.91195e-80	0.413823	0.623	0.125	5.58338e-76	7.4644e-143	0.401898	0.7	0.18	1.43122e-138	2.91195e-80	1.49288e-142
Anp32b	5.51719e-76	0.502441	1	0.976	1.05787e-71	8.25067e-142	0.495513	0.998	0.975	1.58198e-137	5.51719e-76	1.65013e-141
Cenpw	9.00015e-77	0.507779	0.756	0.231	1.72569e-72	3.67723e-141	0.496234	0.824	0.282	7.05073e-137	9.00015e-77	7.35447e-141
Nucks1	2.60601e-89	0.72287	0.989	0.835	4.99676e-85	4.81035e-141	0.635819	0.991	0.878	9.22337e-137	2.60601e-89	9.6207e-141
Bub1b	1.02097e-71	0.406436	0.518	0.09	1.95762e-67	1.9564e-140	0.46326	0.577	0.114	3.75121e-136	1.02097e-71	3.91281e-140
Lsm2	9.97871e-81	0.617458	0.935	0.535	1.91332e-76	3.38383e-140	0.566428	0.954	0.639	6.48816e-136	9.97871e-81	6.76766e-140
Hist1h1a	1.986e-71	0.422158	0.467	0.069	3.80796e-67	1.48842e-138	0.495063	0.516	0.088	2.8539e-134	1.986e-71	2.97685e-138
Kif20a	9.29295e-85	0.482252	0.524	0.071	1.78183e-80	2.55454e-135	0.46099	0.566	0.113	4.89808e-131	9.29295e-85	5.10908e-135
Snrpd1	2.45392e-75	0.554859	0.992	0.892	4.70514e-71	8.92454e-133	0.472554	0.994	0.924	1.71119e-128	2.45392e-75	1.78491e-132
Dnajc9	2.1596e-83	0.701413	0.884	0.395	4.14081e-79	1.83872e-132	0.608476	0.918	0.482	3.52557e-128	2.1596e-83	3.67745e-132
Ncapd2	7.32417e-88	0.414622	0.606	0.104	1.40434e-83	3.3422e-131	0.375916	0.608	0.141	6.40833e-127	7.32417e-88	6.6844e-131
Arhgap11a	5.1631e-62	0.315246	0.419	0.061	9.89974e-58	1.20326e-130	0.338034	0.508	0.087	2.30712e-126	5.1631e-62	2.40651e-130
Srsf3	1.66566e-61	0.479825	0.994	0.957	3.19373e-57	2.16787e-130	0.485934	0.998	0.978	4.15668e-126	1.66566e-61	4.33575e-130
Knstrn	1.31526e-60	0.512188	0.669	0.209	2.52187e-56	3.84515e-130	0.579452	0.741	0.238	7.3727e-126	1.31526e-60	7.69031e-130
Rad51	2.48546e-75	0.361021	0.473	0.065	4.76562e-71	6.30583e-130	0.388093	0.564	0.119	1.20908e-125	2.48546e-75	1.26117e-129
Cenpn	1.59412e-69	0.359105	0.516	0.092	3.05657e-65	1.96057e-129	0.320954	0.575	0.119	3.7592e-125	1.59412e-69	3.92114e-129
Rangap1	4.3603e-79	0.503962	0.697	0.173	8.36044e-75	9.37972e-129	0.511757	0.765	0.268	1.79847e-124	4.3603e-79	1.87594e-128
Ezh2	1.91787e-71	0.567739	0.915	0.472	3.67732e-67	1.64267e-127	0.551132	0.918	0.516	3.14966e-123	1.91787e-71	3.28535e-127
Ccnf	3.15888e-70	0.302246	0.414	0.048	6.05683e-66	2.6562e-127	0.296594	0.446	0.062	5.093e-123	3.15888e-70	5.3124e-127
Ncaph	1.65191e-82	0.389871	0.564	0.092	3.16738e-78	1.00256e-126	0.344369	0.581	0.13	1.92231e-122	1.65191e-82	2.00512e-126
Lockd	3.3189e-81	0.576967	0.623	0.125	6.36366e-77	1.58678e-126	0.527879	0.686	0.207	3.04249e-122	3.3189e-81	3.17356e-126
Hist1h1e	6.41139e-51	0.964242	0.824	0.52	1.22932e-46	1.63947e-126	1.02451	0.866	0.506	3.14352e-122	6.41139e-51	3.27894e-126
Ccnb2	3.08909e-72	0.775276	0.745	0.239	5.92302e-68	1.59371e-125	0.705516	0.801	0.299	3.05579e-121	3.08909e-72	3.18743e-125
Bora	1.21133e-54	0.422745	0.507	0.124	2.3226e-50	2.47466e-125	0.470993	0.599	0.147	4.74492e-121	1.21133e-54	4.94933e-125
Fen1	1.06196e-55	0.374506	0.547	0.14	2.03619e-51	1.0116e-123	0.382318	0.683	0.199	1.93965e-119	1.06196e-55	2.02321e-123
Kifc1	1.4489e-67	0.280364	0.371	0.036	2.77811e-63	1.28393e-123	0.274874	0.428	0.059	2.46181e-119	1.4489e-67	2.56786e-123
Ncapg2	1.45922e-68	0.327018	0.482	0.078	2.79791e-64	7.98713e-122	0.325728	0.517	0.1	1.53145e-117	1.45922e-68	1.59743e-121
Nasp	6.88883e-74	0.668143	0.969	0.64	1.32086e-69	2.32643e-121	0.638658	0.968	0.739	4.46071e-117	6.88883e-74	4.65287e-121
Trim59	1.36761e-52	0.431235	0.598	0.195	2.62225e-48	2.96375e-120	0.403871	0.659	0.189	5.68269e-116	1.36761e-52	5.9275e-120
Tubb4b	4.52671e-72	1.10279	0.955	0.662	8.67951e-68	1.78469e-118	0.905863	0.982	0.785	3.42196e-114	4.52671e-72	3.56937e-118
Diaph3	5.14882e-62	0.274709	0.459	0.076	9.87235e-58	3.64838e-118	0.288743	0.499	0.092	6.99541e-114	5.14882e-62	7.29677e-118
Atad2	6.81277e-85	0.748264	0.793	0.26	1.30628e-80	2.17029e-117	0.602376	0.788	0.333	4.16131e-113	6.81277e-85	4.34057e-117
Ranbp1	2.06061e-67	0.617264	0.986	0.845	3.95101e-63	2.56126e-117	0.560449	0.989	0.891	4.91096e-113	2.06061e-67	5.12251e-117
Kpna2	7.86697e-57	0.411565	0.419	0.074	1.50841e-52	1.49637e-116	0.50776	0.531	0.118	2.86914e-112	7.86697e-57	2.99274e-116
Hist1h1d	7.01347e-54	0.351162	0.445	0.091	1.34476e-49	1.31714e-113	0.429544	0.519	0.115	2.52549e-109	7.01347e-54	2.63428e-113
H2afv	2.30938e-70	0.565924	0.997	0.967	4.42801e-66	1.07642e-112	0.484642	1	0.975	2.06392e-108	2.30938e-70	2.15283e-112
Hist1h4d	5.00258e-57	0.737526	0.677	0.274	9.59194e-53	1.05897e-111	0.757518	0.701	0.287	2.03047e-107	5.00258e-57	2.11795e-111
Uhrf1	1.51026e-75	0.495677	0.635	0.146	2.89578e-71	9.09765e-111	0.41597	0.706	0.232	1.74438e-106	1.51026e-75	1.81953e-110
Anp32e	5.73549e-52	0.519477	0.909	0.58	1.09972e-47	2.43595e-110	0.507227	0.947	0.647	4.67069e-106	5.73549e-52	4.87189e-110
Hirip3	7.38397e-75	0.571345	0.819	0.301	1.4158e-70	2.97513e-110	0.519056	0.81	0.36	5.70451e-106	7.38397e-75	5.95026e-110
Ssrp1	5.14484e-50	0.486743	0.96	0.747	9.86472e-46	7.15624e-109	0.48901	0.973	0.812	1.37214e-104	5.14484e-50	1.43125e-108
Hist2h2ac	1.24508e-48	0.380474	0.501	0.135	2.38732e-44	2.00585e-107	0.427877	0.543	0.143	3.84602e-103	1.24508e-48	4.01171e-107
Cenpp	4.30059e-62	0.314768	0.561	0.124	8.24594e-58	2.3275e-107	0.311631	0.607	0.159	4.46275e-103	4.30059e-62	4.655e-107
Hmgn2	2.46169e-70	0.564996	0.997	0.904	4.72005e-66	1.48642e-106	0.460738	0.998	0.948	2.85007e-102	2.46169e-70	2.97285e-106
Syce2	7.79262e-55	0.42772	0.674	0.234	1.49416e-50	5.81262e-106	0.428476	0.757	0.298	1.11451e-101	7.79262e-55	1.16252e-105
Hmgb3	2.39499e-51	0.482729	0.966	0.682	4.59216e-47	1.74441e-103	0.517617	0.979	0.721	3.34474e-99	2.39499e-51	3.48882e-103
Cdc45	3.1145e-52	0.294025	0.433	0.089	5.97173e-48	7.00863e-103	0.319379	0.514	0.121	1.34383e-98	3.1145e-52	1.40173e-102
Srsf7	2.12843e-46	0.433829	0.977	0.754	4.08104e-42	3.3101e-102	0.47716	0.983	0.822	6.34679e-98	2.12843e-46	6.6202e-102
Hspa8	7.64182e-53	0.381736	1	0.997	1.46524e-48	4.48617e-102	0.391705	0.998	0.997	8.60178e-98	7.64182e-53	8.97234e-102
Usp1	4.36379e-69	0.546815	0.853	0.363	8.36712e-65	6.08051e-102	0.486514	0.862	0.446	1.16588e-97	4.36379e-69	1.2161e-101
Hnrnpd	1.18739e-52	0.416257	0.992	0.929	2.2767e-48	8.53726e-102	0.417854	0.997	0.946	1.63693e-97	1.18739e-52	1.70745e-101
Alyref	1.19766e-56	0.497225	0.932	0.643	2.29639e-52	1.45823e-101	0.45416	0.956	0.725	2.79601e-97	1.19766e-56	2.91646e-101
Sapcd2	6.12692e-50	0.260283	0.297	0.033	1.17478e-45	4.67448e-101	0.265918	0.349	0.045	8.96285e-97	6.12692e-50	9.34897e-101
Pmf1	6.45286e-54	0.382299	0.734	0.278	1.23727e-49	8.62146e-101	0.39681	0.815	0.362	1.65308e-96	6.45286e-54	1.72429e-100
Rfc5	3.60603e-56	0.383472	0.731	0.257	6.9142e-52	1.50515e-100	0.36406	0.745	0.286	2.88597e-96	3.60603e-56	3.01029e-100
Exo1	5.42609e-68	0.267878	0.431	0.057	1.0404e-63	5.33015e-100	0.267747	0.451	0.09	1.022e-95	5.42609e-68	1.06603e-99
Cenpa	3.94912e-56	0.914769	0.703	0.283	7.57204e-52	2.14561e-99	0.819769	0.754	0.337	4.114e-95	3.94912e-56	4.29122e-99
Ybx1	4.40279e-45	0.327011	0.997	0.991	8.44191e-41	2.35354e-99	0.352726	1	0.996	4.51268e-95	4.40279e-45	4.70708e-99
Dut	3.19563e-60	0.622479	0.881	0.537	6.1273e-56	8.80601e-99	0.560029	0.903	0.608	1.68847e-94	3.19563e-60	1.7612e-98
Mcm5	2.00037e-74	0.595621	0.759	0.246	3.8355e-70	1.13651e-98	0.531455	0.781	0.347	2.17915e-94	2.00037e-74	2.27303e-98
Dhfr	4.76361e-63	0.497722	0.589	0.162	9.13375e-59	2.74418e-98	0.42097	0.674	0.239	5.2617e-94	4.76361e-63	5.48837e-98
Bub3	1.94818e-46	0.578459	0.873	0.567	3.73545e-42	3.78512e-98	0.592597	0.921	0.652	7.25759e-94	1.94818e-46	7.57024e-98
Fam111a	8.18679e-71	0.495054	0.626	0.154	1.56973e-66	1.11011e-95	0.403198	0.692	0.249	2.12853e-91	8.18679e-71	2.22023e-95
Ppia	1.51279e-52	0.274684	1	0.998	2.90062e-48	2.29617e-95	0.26308	1	1	4.40268e-91	1.51279e-52	4.59235e-95
Rfc4	4.82663e-54	0.430214	0.785	0.342	9.25457e-50	9.49465e-95	0.411536	0.832	0.396	1.8205e-90	4.82663e-54	1.89893e-94
Slfn9	3.6958e-61	0.353224	0.422	0.065	7.08632e-57	5.78602e-94	0.26892	0.375	0.061	1.10941e-89	3.6958e-61	1.1572e-93
Psrc1	1.11503e-56	0.35133	0.456	0.086	2.13796e-52	4.36118e-93	0.34536	0.48	0.115	8.36214e-89	1.11503e-56	8.72237e-93
Psip1	2.20652e-56	0.493773	0.966	0.791	4.23079e-52	5.92324e-93	0.430776	0.976	0.844	1.13572e-88	2.20652e-56	1.18465e-92
Hsp90aa1	5.32332e-48	0.408179	0.992	0.945	1.02069e-43	1.68921e-92	0.404473	0.998	0.963	3.23889e-88	5.32332e-48	3.37842e-92
Rad21	8.24849e-46	0.451107	0.805	0.429	1.58157e-41	3.7216e-92	0.471281	0.844	0.462	7.1358e-88	8.24849e-46	7.44321e-92
Chaf1a	1.70962e-64	0.356382	0.581	0.136	3.27802e-60	4.88035e-91	0.320629	0.651	0.218	9.35759e-87	1.70962e-64	9.76071e-91
Lig1	4.29371e-67	0.751663	0.765	0.307	8.23276e-63	1.08357e-90	0.630185	0.777	0.391	2.07763e-86	4.29371e-67	2.16713e-90
Srsf2	5.97259e-42	0.395936	0.977	0.85	1.14518e-37	5.91534e-90	0.429489	0.991	0.914	1.13421e-85	5.97259e-42	1.18307e-89
G2e3	6.10376e-53	0.457106	0.609	0.2	1.17033e-48	7.47204e-90	0.433238	0.637	0.246	1.43269e-85	6.10376e-53	1.49441e-89
Nde1	1.30371e-62	0.53582	0.705	0.246	2.49974e-58	1.43536e-89	0.472911	0.734	0.322	2.75216e-85	1.30371e-62	2.87072e-89
Cmc2	4.84012e-49	0.430464	0.759	0.332	9.28045e-45	1.14049e-88	0.386978	0.825	0.405	2.18677e-84	4.84012e-49	2.28098e-88
Vim	9.30456e-37	-0.492217	0.994	0.999	1.78406e-32	7.23012e-86	-0.533664	0.995	0.999	1.3863e-81	9.30456e-37	1.44602e-85
Gas2l3	1.97897e-54	0.267246	0.337	0.041	3.79448e-50	5.59629e-84	0.276418	0.364	0.068	1.07303e-79	1.97897e-54	1.11926e-83
Cdkn3	5.01494e-54	0.419051	0.45	0.092	9.61564e-50	2.31556e-82	0.412699	0.492	0.143	4.43985e-78	5.01494e-54	4.63112e-82
Cdca4	2.78831e-40	0.255056	0.49	0.145	5.34631e-36	1.22849e-80	0.261346	0.593	0.197	2.35551e-76	2.78831e-40	2.45699e-80
H1fx	8.53772e-47	0.528587	0.975	0.859	1.63702e-42	1.76398e-80	0.530195	0.988	0.872	3.38226e-76	8.53772e-47	3.52797e-80
Gins2	8.6975e-50	0.40927	0.643	0.228	1.66766e-45	1.9817e-80	0.387309	0.719	0.319	3.79971e-76	8.6975e-50	3.9634e-80
Lsm6	1.50708e-44	0.418202	0.926	0.639	2.88967e-40	4.34409e-80	0.384092	0.962	0.726	8.32936e-76	1.50708e-44	8.68818e-80
Mcm7	7.24099e-51	0.539652	0.83	0.396	1.38839e-46	4.82518e-80	0.534905	0.847	0.496	9.2518e-76	7.24099e-51	9.65036e-80
Prim1	8.21353e-47	0.399231	0.632	0.236	1.57486e-42	5.35515e-80	0.38585	0.718	0.314	1.0268e-75	8.21353e-47	1.07103e-79
Wee1	5.64024e-60	0.33837	0.569	0.139	1.08146e-55	8.14773e-80	0.287022	0.592	0.204	1.56225e-75	5.64024e-60	1.62955e-79
Hist1h4h	4.76771e-42	0.314612	0.433	0.109	9.1416e-38	1.02162e-79	0.327304	0.472	0.132	1.95886e-75	4.76771e-42	2.04325e-79
Sae1	3.11916e-27	0.302435	0.924	0.693	5.98068e-23	1.73492e-79	0.388971	0.967	0.751	3.32654e-75	3.11916e-27	3.46984e-79
Lsm8	9.18113e-45	0.414743	0.918	0.617	1.76039e-40	9.3894e-79	0.403227	0.93	0.659	1.80032e-74	9.18113e-45	1.87788e-78
Exosc8	3.5709e-47	0.394417	0.856	0.421	6.84685e-43	1.275e-77	0.365116	0.877	0.513	2.44469e-73	3.5709e-47	2.55e-77
Itm2b	1.20741e-33	-0.387956	0.989	0.993	2.31508e-29	2.23098e-77	-0.415897	0.983	0.993	4.27768e-73	1.20741e-33	4.46196e-77
Rpa2	2.65255e-54	0.422326	0.64	0.213	5.08599e-50	2.89945e-77	0.374656	0.713	0.31	5.5594e-73	2.65255e-54	5.7989e-77
Topbp1	9.33256e-41	0.345843	0.649	0.255	1.78942e-36	9.50753e-76	0.360924	0.713	0.318	1.82297e-71	9.33256e-41	1.90151e-75
Dscc1	2.91004e-44	0.250244	0.351	0.064	5.57972e-40	1.89715e-75	0.25183	0.425	0.108	3.63759e-71	2.91004e-44	3.7943e-75
Fignl1	3.8414e-45	0.255418	0.513	0.14	7.3655e-41	2.80939e-75	0.25681	0.568	0.186	5.38673e-71	3.8414e-45	5.61878e-75
Pola1	7.75721e-46	0.344131	0.501	0.136	1.48737e-41	3.27326e-75	0.278481	0.537	0.176	6.27614e-71	7.75721e-46	6.54652e-75
Rnaseh2c	2.69694e-41	0.416267	0.938	0.672	5.17111e-37	4.51719e-75	0.392275	0.956	0.711	8.66126e-71	2.69694e-41	9.03438e-75
Chaf1b	1.44201e-45	0.329753	0.442	0.107	2.76492e-41	4.5794e-75	0.331854	0.504	0.16	8.78054e-71	1.44201e-45	9.1588e-75
Dtymk	7.61064e-41	0.442419	0.907	0.644	1.45926e-36	6.53483e-75	0.395424	0.936	0.729	1.25299e-70	7.61064e-41	1.30697e-74
Skp2	9.00345e-39	0.294147	0.572	0.203	1.72632e-34	7.00334e-75	0.298806	0.683	0.28	1.34282e-70	9.00345e-39	1.40067e-74
Nme1	7.07072e-36	0.408836	0.972	0.828	1.35574e-31	1.12413e-74	0.403902	0.989	0.897	2.15541e-70	7.07072e-36	2.24827e-74
Hnrnpab	2.25681e-43	0.408745	0.986	0.816	4.32721e-39	1.69587e-74	0.36326	0.989	0.881	3.25167e-70	2.25681e-43	3.39175e-74
U2af1	5.10225e-31	0.328931	0.963	0.849	9.78305e-27	1.98452e-74	0.353424	0.98	0.894	3.80511e-70	5.10225e-31	3.96903e-74
Set	6.19162e-31	0.307509	0.997	0.976	1.18718e-26	2.98368e-74	0.369293	0.998	0.978	5.7209e-70	6.19162e-31	5.96735e-74
Rbm3	2.7038e-47	0.343492	0.997	0.974	5.18426e-43	5.89118e-74	0.308671	0.998	0.985	1.12957e-69	2.7038e-47	1.17824e-73
Calm2	1.22529e-34	0.365861	0.994	0.979	2.34938e-30	1.04843e-72	0.363998	0.997	0.985	2.01025e-68	1.22529e-34	2.09685e-72
Arl6ip1	1.5944e-43	1.03869	0.827	0.563	3.0571e-39	3.80025e-72	0.943286	0.829	0.598	7.2866e-68	1.5944e-43	7.6005e-72
Dnmt1	1.02667e-53	0.485027	0.731	0.304	1.96853e-49	8.03244e-72	0.408104	0.747	0.377	1.54014e-67	1.02667e-53	1.60649e-71
Jpt1	6.29041e-46	0.655315	0.904	0.653	1.20612e-41	1.07059e-71	0.617467	0.938	0.755	2.05275e-67	6.29041e-46	2.14118e-71
Sumo2	1.252e-38	0.28456	0.994	0.987	2.40059e-34	5.47226e-71	0.261022	0.998	0.99	1.04925e-66	1.252e-38	1.09445e-70
Vrk1	7.29742e-46	0.27524	0.615	0.199	1.39921e-41	5.58376e-71	0.269217	0.642	0.249	1.07063e-66	7.29742e-46	1.11675e-70
Dctpp1	1.0778e-47	0.507763	0.847	0.496	2.06657e-43	7.3996e-71	0.42998	0.869	0.577	1.4188e-66	1.0778e-47	1.47992e-70
Hnrnpf	5.38421e-35	0.316221	0.994	0.96	1.03237e-30	8.06236e-71	0.32623	0.998	0.972	1.54588e-66	5.38421e-35	1.61247e-70
Hnrnpa2b1	1.46252e-33	0.315871	0.997	0.976	2.80424e-29	5.80577e-70	0.319996	0.995	0.983	1.1132e-65	1.46252e-33	1.16115e-69
Sparc	1.55834e-33	-0.647262	0.972	0.992	2.98797e-29	7.96873e-70	-0.743347	0.989	0.999	1.52792e-65	1.55834e-33	1.59375e-69
Smc1a	6.2191e-33	0.362803	0.96	0.816	1.19245e-28	1.373e-69	0.364845	0.97	0.841	2.63259e-65	6.2191e-33	2.746e-69
Nxt1	1.43142e-33	0.318452	0.703	0.342	2.74461e-29	2.59565e-69	0.331967	0.786	0.414	4.97691e-65	1.43142e-33	5.19131e-69
Hells	6.97227e-46	0.445037	0.615	0.226	1.33686e-41	3.11346e-69	0.423346	0.668	0.298	5.96975e-65	6.97227e-46	6.22692e-69
Tipin	4.69232e-38	0.38577	0.771	0.391	8.99706e-34	1.01229e-67	0.405773	0.836	0.503	1.94097e-63	4.69232e-38	2.02458e-67
Ddx39b	5.87432e-37	0.328218	0.977	0.902	1.12634e-32	1.03771e-67	0.33135	0.983	0.935	1.98971e-63	5.87432e-37	2.07542e-67
Tubb6	2.92959e-32	0.402887	0.725	0.385	5.6172e-28	1.59514e-67	0.429215	0.854	0.506	3.05852e-63	2.92959e-32	3.19028e-67
Ckap5	7.29788e-48	0.466701	0.785	0.368	1.39929e-43	1.62369e-67	0.433623	0.75	0.404	3.11326e-63	7.29788e-48	3.24738e-67
Psmc3ip	7.81516e-41	0.251072	0.518	0.157	1.49848e-36	4.12573e-67	0.251579	0.577	0.209	7.91067e-63	7.81516e-41	8.25145e-67
Prim2	2.2143e-43	0.306358	0.49	0.139	4.2457e-39	7.09937e-67	0.258242	0.574	0.211	1.36123e-62	2.2143e-43	1.41987e-66
Lsm3	2.78012e-43	0.391076	0.941	0.659	5.3306e-39	7.68296e-66	0.33484	0.945	0.731	1.47313e-61	2.78012e-43	1.53659e-65
Pa2g4	6.79436e-25	0.317878	0.892	0.711	1.30275e-20	1.21407e-64	0.361796	0.947	0.762	2.32786e-60	6.79436e-25	2.42814e-64
Rnf26	7.12218e-28	0.267379	0.575	0.258	1.36561e-23	4.11573e-64	0.307026	0.675	0.301	7.8915e-60	7.12218e-28	8.23146e-64
Selenom	9.56976e-25	-0.407707	0.949	0.943	1.83491e-20	5.00969e-64	-0.452487	0.944	0.962	9.60557e-60	9.56976e-25	1.00194e-63
Banf1	3.33513e-26	0.285837	0.96	0.802	6.39479e-22	3.25555e-63	0.327186	0.976	0.853	6.24219e-59	3.33513e-26	6.5111e-63
Cdkn2d	1.66754e-39	0.395151	0.635	0.266	3.19734e-35	6.64873e-63	0.389125	0.672	0.328	1.27483e-58	1.66754e-39	1.32975e-62
Rfc3	4.10033e-32	0.371912	0.739	0.412	7.86198e-28	6.94364e-63	0.393833	0.819	0.484	1.33137e-58	4.10033e-32	1.38873e-62
Hat1	3.58903e-42	0.408463	0.79	0.394	6.8816e-38	9.0601e-63	0.395867	0.81	0.487	1.73718e-58	3.58903e-42	1.81202e-62
Serbp1	3.13399e-31	0.251736	1	0.994	6.00911e-27	1.22672e-62	0.278085	0.998	0.994	2.35212e-58	3.13399e-31	2.45345e-62
Mxd4	2.25171e-28	-0.431272	0.739	0.82	4.31743e-24	1.70004e-62	-0.439615	0.747	0.862	3.25966e-58	2.25171e-28	3.40008e-62
Rcc2	4.22395e-26	0.266211	0.705	0.353	8.099e-22	7.72976e-62	0.329664	0.762	0.406	1.48211e-57	4.22395e-26	1.54595e-61
Nsd2	3.55915e-43	0.368764	0.688	0.289	6.82432e-39	8.39208e-62	0.289489	0.731	0.353	1.6091e-57	3.55915e-43	1.67842e-61
Aldh1a2	4.20237e-30	0.401715	0.762	0.415	8.05763e-26	2.36003e-61	0.486741	0.794	0.448	4.52513e-57	4.20237e-30	4.72007e-61
Snrpa1	1.49851e-29	0.342468	0.881	0.611	2.87325e-25	2.92411e-61	0.334929	0.939	0.701	5.60669e-57	1.49851e-29	5.84822e-61
H2afy	6.83445e-30	0.285192	0.975	0.876	1.31044e-25	4.40262e-61	0.311592	0.983	0.915	8.44158e-57	6.83445e-30	8.80523e-61
Ncapd3	5.20256e-56	0.366192	0.629	0.188	9.97538e-52	4.54274e-61	0.282959	0.595	0.247	8.71025e-57	5.20256e-56	9.08548e-61
Hnrnpa3	4.48806e-37	0.354607	0.997	0.94	8.6054e-33	1.44958e-60	0.325791	1	0.978	2.77942e-56	4.48806e-37	2.89916e-60
Dtl	2.14016e-37	0.327296	0.524	0.179	4.10354e-33	1.42876e-59	0.284524	0.581	0.235	2.73951e-55	2.14016e-37	2.85752e-59
Nt5dc2	6.17228e-33	0.353905	0.958	0.719	1.18347e-28	1.90747e-59	0.31423	0.976	0.82	3.65738e-55	6.17228e-33	3.81494e-59
Cdk5rap2	1.61774e-40	0.317144	0.552	0.185	3.10186e-36	1.99855e-59	0.284439	0.571	0.228	3.83202e-55	1.61774e-40	3.9971e-59
Tcf19	1.21044e-45	0.275521	0.419	0.093	2.3209e-41	8.25254e-59	0.2505	0.454	0.152	1.58234e-54	1.21044e-45	1.65051e-58
Cd81	4.88953e-21	-0.257049	0.98	0.992	9.37519e-17	1.55626e-58	-0.317329	0.991	0.995	2.98397e-54	4.88953e-21	3.11252e-58
Lsm5	2.15547e-28	0.317245	0.864	0.552	4.1329e-24	1.92345e-58	0.312246	0.898	0.605	3.68803e-54	2.15547e-28	3.84691e-58
Ddx39	5.26005e-28	0.316419	0.731	0.383	1.00856e-23	2.79244e-58	0.330678	0.795	0.455	5.35423e-54	5.26005e-28	5.58489e-58
Myl6	2.42699e-54	-0.587536	1	1	4.6535e-50	3.65981e-58	-0.44831	1	0.999	7.01733e-54	2.42699e-54	7.31963e-58
Cdk4	3.66222e-24	0.255518	0.989	0.944	7.02194e-20	1.6086e-57	0.283758	0.989	0.966	3.08432e-53	3.66222e-24	3.21719e-57
Smchd1	6.01467e-25	0.31457	0.839	0.508	1.15325e-20	3.44125e-56	0.309919	0.86	0.587	6.59824e-52	6.01467e-25	6.88249e-56
Nsmce4a	2.59578e-35	0.322714	0.918	0.638	4.97715e-31	9.30221e-55	0.285895	0.933	0.695	1.78361e-50	2.59578e-35	1.86044e-54
Tuba1c	2.16181e-27	0.373801	0.516	0.224	4.14506e-23	1.08833e-54	0.338429	0.507	0.206	2.08676e-50	2.16181e-27	2.17666e-54
Lyar	2.08584e-36	0.363293	0.875	0.532	3.99939e-32	2.94849e-54	0.316	0.897	0.62	5.65344e-50	2.08584e-36	5.89698e-54
Lgals1	2.53298e-12	-0.256892	0.992	0.991	4.85674e-08	5.73814e-54	-0.392889	0.997	0.995	1.10023e-49	2.53298e-12	1.14763e-53
Rras	4.82873e-29	-0.474524	0.462	0.662	9.25861e-25	7.07043e-54	-0.427504	0.428	0.647	1.35568e-49	4.82873e-29	1.41409e-53
Ncl	4.62431e-29	0.300341	0.992	0.988	8.86666e-25	7.2812e-54	0.315891	0.998	0.99	1.3961e-49	4.62431e-29	1.45624e-53
Ctcf	4.98327e-27	0.308939	0.929	0.713	9.55491e-23	7.58063e-54	0.318258	0.938	0.746	1.45351e-49	4.98327e-27	1.51613e-53
Slbp	7.17565e-44	0.583086	0.833	0.506	1.37586e-39	9.52963e-54	0.414831	0.857	0.613	1.82721e-49	7.17565e-44	1.90593e-53
Smc6	4.53688e-39	0.406547	0.926	0.711	8.69901e-35	1.11267e-53	0.328644	0.95	0.771	2.13344e-49	4.53688e-39	2.22535e-53
Cdc25b	5.36768e-36	0.278718	0.374	0.096	1.0292e-31	4.69574e-53	0.252247	0.416	0.141	9.00362e-49	5.36768e-36	9.39149e-53
Nap1l1	6.91932e-41	0.370478	0.98	0.946	1.32671e-36	5.68372e-53	0.284099	0.992	0.96	1.0898e-48	6.91932e-41	1.13674e-52
Ppp1cc	1.26639e-21	0.26647	0.952	0.772	2.42818e-17	8.13291e-53	0.297895	0.965	0.836	1.5594e-48	1.26639e-21	1.62658e-52
Map1lc3a	1.10754e-24	-0.38422	0.864	0.895	2.12359e-20	1.20884e-51	-0.358419	0.888	0.93	2.31782e-47	1.10754e-24	2.41767e-51
Lsm4	3.33026e-28	0.305351	0.972	0.841	6.38544e-24	7.9192e-51	0.299057	0.959	0.837	1.51843e-46	3.33026e-28	1.58384e-50
Mcm3	5.17703e-42	0.489481	0.7	0.315	9.92644e-38	2.93972e-50	0.418946	0.737	0.436	5.63663e-46	5.17703e-42	5.87945e-50
Sms	5.43596e-29	0.341538	0.83	0.497	1.04229e-24	6.09341e-50	0.305181	0.853	0.575	1.16835e-45	5.43596e-29	1.21868e-49
Mrpl51	1.22619e-26	0.301929	0.938	0.701	2.35109e-22	1.32005e-49	0.272808	0.945	0.76	2.53106e-45	1.22619e-26	2.6401e-49
Rfc2	3.37411e-39	0.396002	0.782	0.416	6.46953e-35	1.34855e-49	0.331272	0.813	0.524	2.58571e-45	3.37411e-39	2.6971e-49
Nop58	7.82129e-25	0.338467	0.918	0.718	1.49965e-20	2.20578e-49	0.329611	0.953	0.771	4.22937e-45	7.82129e-25	4.41157e-49
Hnrnpu	6.28926e-23	0.30533	0.994	0.928	1.2059e-18	2.26834e-49	0.306109	0.991	0.952	4.34932e-45	6.28926e-23	4.53669e-49
Hdgf	8.16979e-24	0.302975	0.952	0.837	1.56648e-19	2.79687e-49	0.295921	0.97	0.853	5.36272e-45	8.16979e-24	5.59375e-49
Cbx5	4.35021e-19	0.254222	0.915	0.741	8.3411e-15	6.06261e-49	0.298968	0.948	0.746	1.16244e-44	4.35021e-19	1.21252e-48
Ccne2	7.42336e-38	0.290624	0.36	0.083	1.42336e-33	1.01789e-48	0.26432	0.366	0.12	1.95169e-44	7.42336e-38	2.03577e-48
Snrnp40	5.80574e-32	0.32708	0.847	0.514	1.11319e-27	1.21741e-48	0.284185	0.886	0.617	2.33427e-44	5.80574e-32	2.43482e-48
Snrpf	4.84605e-22	0.262553	0.975	0.877	9.29182e-18	2.64567e-48	0.269318	0.989	0.922	5.0728e-44	4.84605e-22	5.29133e-48
Ssb	6.42876e-28	0.289408	0.994	0.927	1.23265e-23	2.72041e-48	0.253707	0.989	0.945	5.21612e-44	6.42876e-28	5.44083e-48
Tpm1	9.47108e-36	-0.863491	0.89	0.929	1.81598e-31	3.49442e-48	-0.636251	0.912	0.945	6.7002e-44	9.47108e-36	6.98884e-48
Meg3	2.13246e-13	-0.780729	0.785	0.785	4.08878e-09	7.03225e-48	-1.12104	0.851	0.881	1.34836e-43	2.13246e-13	1.40645e-47
Gabarap	7.25667e-26	-0.304989	0.975	0.986	1.39139e-21	7.60381e-48	-0.294142	0.991	0.983	1.45795e-43	7.25667e-26	1.52076e-47
Hpf1	5.22816e-20	0.273305	0.81	0.568	1.00245e-15	7.03962e-47	0.286051	0.865	0.615	1.34978e-42	5.22816e-20	1.40792e-46
Ccne1	1.2053e-25	0.270453	0.442	0.172	2.31104e-21	7.05477e-47	0.255513	0.608	0.285	1.35268e-42	1.2053e-25	1.41095e-46
Nudc	4.14269e-26	0.292041	0.969	0.832	7.94319e-22	7.44005e-47	0.257326	0.967	0.888	1.42656e-42	4.14269e-26	1.48801e-46
Timp2	1.33801e-17	-0.325956	0.717	0.776	2.56549e-13	9.3748e-47	-0.434427	0.768	0.833	1.79752e-42	1.33801e-17	1.87496e-46
Srsf10	1.15573e-29	0.327443	0.898	0.696	2.21599e-25	2.66543e-46	0.276074	0.95	0.764	5.1107e-42	1.15573e-29	5.33087e-46
Tra2b	2.4982e-24	0.285896	0.926	0.786	4.79006e-20	3.12831e-46	0.289452	0.965	0.85	5.99822e-42	2.4982e-24	6.25662e-46
Pgp	9.7118e-25	0.267863	0.839	0.518	1.86214e-20	3.87944e-46	0.298058	0.839	0.564	7.43844e-42	9.7118e-25	7.75888e-46
Hnrnpdl	2.14514e-25	0.323718	0.975	0.839	4.11309e-21	5.53075e-46	0.300195	0.98	0.881	1.06047e-41	2.14514e-25	1.10615e-45
Tagln	1.66745e-25	-1.56827	0.309	0.567	3.19717e-21	9.53846e-46	-1.37498	0.323	0.576	1.82891e-41	1.66745e-25	1.90769e-45
Fkbp3	1.67913e-24	0.300973	0.958	0.855	3.21957e-20	1.44748e-45	0.258753	0.979	0.89	2.7754e-41	1.67913e-24	2.89497e-45
Tfdp1	5.53188e-21	0.279921	0.646	0.35	1.06068e-16	2.93666e-45	0.262494	0.727	0.401	5.63075e-41	5.53188e-21	5.87332e-45
G3bp1	4.4232e-27	0.31153	0.958	0.809	8.48105e-23	3.38668e-45	0.279561	0.977	0.877	6.49363e-41	4.4232e-27	6.77337e-45
Col4a1	1.51352e-26	-0.565931	0.83	0.9	2.90203e-22	6.84815e-45	-0.618858	0.859	0.892	1.31306e-40	1.51352e-26	1.36963e-44
Dkk1	4.37182e-19	0.433426	0.45	0.204	8.38253e-15	3.44393e-44	0.448473	0.442	0.171	6.60339e-40	4.37182e-19	6.88785e-44
Rabac1	1.1421e-16	-0.304653	0.839	0.843	2.18987e-12	3.43683e-43	-0.343874	0.819	0.89	6.58978e-39	1.1421e-16	6.87366e-43
Bgn	7.14566e-21	-0.41697	0.836	0.905	1.37011e-16	6.47967e-43	-0.419891	0.883	0.936	1.24241e-38	7.14566e-21	1.29593e-42
Fibin	1.05367e-34	0.379654	0.632	0.26	2.0203e-30	2.01221e-42	0.334542	0.621	0.314	3.85821e-38	1.05367e-34	4.02442e-42
Eif5a	2.42612e-18	0.250126	0.992	0.977	4.65183e-14	7.82651e-42	0.280066	0.994	0.987	1.50065e-37	2.42612e-18	1.5653e-41
Mrpl18	7.17155e-26	0.3031	0.918	0.719	1.37507e-21	8.64454e-42	0.299922	0.933	0.782	1.6575e-37	7.17155e-26	1.72891e-41
Orc6	3.35143e-23	0.261247	0.705	0.375	6.42603e-19	2.86942e-41	0.271059	0.757	0.463	5.50183e-37	3.35143e-23	5.73884e-41
Nop56	4.82971e-23	0.288764	0.847	0.569	9.26049e-19	4.27916e-41	0.29878	0.883	0.638	8.20487e-37	4.82971e-23	8.55833e-41
Hspd1	1.83946e-17	0.264767	0.946	0.895	3.52699e-13	1.45777e-40	0.29669	0.982	0.93	2.79513e-36	1.83946e-17	2.91554e-40
Col1a1	1.47155e-11	-0.671346	0.98	0.895	2.82155e-07	4.89377e-40	-0.81083	0.976	0.934	9.38331e-36	1.47155e-11	9.78753e-40
Gsn	5.71314e-15	-0.496825	0.728	0.784	1.09544e-10	6.18954e-40	-0.625904	0.772	0.852	1.18678e-35	5.71314e-15	1.23791e-39
Col1a2	2.25539e-16	-0.542301	0.98	0.971	4.32448e-12	1.33519e-39	-0.665691	0.983	0.983	2.5601e-35	2.25539e-16	2.67038e-39
Snhg18	2.22043e-19	-0.364697	0.773	0.834	4.25745e-15	2.24445e-39	-0.39434	0.794	0.853	4.30351e-35	2.22043e-19	4.4889e-39
Gm42418	1.0729e-21	-0.284246	1	1	2.05719e-17	3.97431e-38	-0.33403	1	1	7.62035e-34	1.0729e-21	7.94863e-38
Gnas	1.16842e-16	-0.3328	0.994	1	2.24034e-12	6.23943e-38	-0.325791	1	1	1.19635e-33	1.16842e-16	1.24789e-37
Cdca7	1.707e-28	0.34809	0.683	0.335	3.273e-24	6.56221e-38	0.292719	0.725	0.43	1.25824e-33	1.707e-28	1.31244e-37
Dcn	3.99194e-14	-0.943281	0.442	0.578	7.65415e-10	7.53466e-38	-1.07529	0.564	0.709	1.44469e-33	3.99194e-14	1.50693e-37
Kdm5b	2.87097e-18	-0.315827	0.572	0.721	5.50479e-14	1.50171e-37	-0.329795	0.595	0.739	2.87938e-33	2.87097e-18	3.00342e-37
Supt16	1.46632e-23	0.291427	0.901	0.662	2.81153e-19	2.63767e-37	0.284005	0.92	0.715	5.05746e-33	1.46632e-23	5.27533e-37
Sfpq	4.16245e-18	0.29357	0.966	0.845	7.98108e-14	8.91069e-37	0.287038	0.971	0.901	1.70854e-32	4.16245e-18	1.78214e-36
Col3a1	6.29567e-10	-0.49003	0.983	0.929	1.20713e-05	1.1439e-36	-0.675374	0.988	0.964	2.19331e-32	6.29567e-10	2.2878e-36
Tmsb4x	4.33055e-29	-0.539238	0.997	1	8.30339e-25	2.94288e-36	-0.501737	1	1	5.64267e-32	4.33055e-29	5.88575e-36
Col4a2	7.08197e-29	-0.525374	0.697	0.821	1.3579e-24	1.29509e-35	-0.490653	0.748	0.81	2.4832e-31	7.08197e-29	2.59017e-35
Shisa3	6.70851e-24	0.321341	0.64	0.331	1.28629e-19	2.31645e-35	0.289588	0.668	0.382	4.44157e-31	6.70851e-24	4.63291e-35
Cavin3	1.05927e-12	-0.518658	0.32	0.469	2.03105e-08	5.92728e-35	-0.555297	0.401	0.586	1.1365e-30	1.05927e-12	1.18546e-34
Sfrp2	1.38425e-14	-0.705698	0.113	0.301	2.65416e-10	1.53862e-34	-0.73819	0.138	0.371	2.95016e-30	1.38425e-14	3.07725e-34
Rbbp4	1.3357e-18	0.259545	0.929	0.8	2.56107e-14	1.10705e-33	0.253402	0.968	0.831	2.12265e-29	1.3357e-18	2.2141e-33
H1f0	1.14226e-12	0.307825	0.946	0.837	2.19017e-08	1.41351e-33	0.381334	0.92	0.822	2.71026e-29	1.14226e-12	2.82702e-33
Acta2	1.3852e-24	-1.49528	0.779	0.841	2.65598e-20	8.68224e-33	-1.2902	0.865	0.862	1.66473e-28	1.3852e-24	1.73645e-32
Ech1	1.29832e-13	-0.278015	0.711	0.756	2.4894e-09	1.07031e-32	-0.301769	0.753	0.813	2.0522e-28	1.29832e-13	2.14061e-32
Myl9	6.57821e-30	-0.888808	0.83	0.895	1.26131e-25	1.59443e-32	-0.694268	0.882	0.899	3.05715e-28	6.57821e-30	3.18885e-32
Mcm6	2.32347e-22	0.399936	0.677	0.407	4.45503e-18	1.23078e-31	0.312802	0.693	0.455	2.3599e-27	2.32347e-22	2.46156e-31
Igfbp7	2.38276e-14	-0.511921	0.946	0.946	4.5687e-10	2.32822e-31	-0.54474	0.968	0.946	4.46413e-27	2.38276e-14	4.65644e-31
Ndrg2	1.74965e-18	-0.422978	0.119	0.339	3.35478e-14	5.04556e-31	-0.372557	0.155	0.371	9.67436e-27	1.74965e-18	1.00911e-30
Ahnak	1.98e-10	-0.298965	0.586	0.691	3.79644e-06	5.34892e-31	-0.373381	0.615	0.728	1.0256e-26	1.98e-10	1.06978e-30
Ogn	6.15283e-19	-0.55738	0.351	0.537	1.17974e-14	6.55345e-31	-0.560423	0.401	0.566	1.25656e-26	6.15283e-19	1.31069e-30
Aes	1.0159e-17	-0.382511	0.705	0.774	1.94788e-13	1.42686e-30	-0.370521	0.8	0.827	2.73587e-26	1.0159e-17	2.85373e-30
Col6a1	9.05513e-06	-0.298099	0.66	0.67	0.173623	1.96155e-30	-0.508507	0.669	0.753	3.76108e-26	9.05513e-06	3.92311e-30
Tsc22d1	1.91162e-15	-0.343928	0.898	0.889	3.66535e-11	5.10527e-29	-0.321606	0.92	0.93	9.78885e-25	1.91162e-15	1.02105e-28
Mylk	3.49065e-17	-0.86682	0.813	0.817	6.69297e-13	2.95224e-26	-0.869697	0.813	0.817	5.66062e-22	3.49065e-17	5.90447e-26
Cdkn1c	3.81987e-11	-0.90828	0.977	0.973	7.32421e-07	3.2957e-26	-0.92879	0.991	0.991	6.31918e-22	3.81987e-11	6.59141e-26
S100a6	3.18081e-09	-0.445031	0.847	0.833	6.09888e-05	5.31226e-26	-0.508985	0.874	0.874	1.01857e-21	3.18081e-09	1.06245e-25
Rsu1	3.59155e-15	-0.28337	0.833	0.855	6.88645e-11	1.26721e-25	-0.2511	0.873	0.892	2.42974e-21	3.59155e-15	2.53441e-25
Col6a2	4.33263e-06	-0.294193	0.637	0.668	0.0830738	2.65168e-25	-0.474083	0.677	0.745	5.08433e-21	4.33263e-06	5.30335e-25
Malat1	4.38209e-20	-0.37603	1	1	8.40223e-16	4.02738e-25	-0.361371	1	1	7.7221e-21	4.38209e-20	8.05476e-25
Cald1	5.60345e-25	-0.39042	0.994	0.995	1.07441e-20	4.89403e-23	-0.342488	0.992	0.99	9.38381e-19	4.89403e-23	1.12069e-24
S100a11	2.47539e-14	-0.289878	0.975	0.969	4.74631e-10	5.88819e-25	-0.29992	0.985	0.978	1.129e-20	2.47539e-14	1.17764e-24
Thra	1.20977e-10	-0.250705	0.768	0.775	2.31961e-06	7.14483e-25	-0.257446	0.819	0.835	1.36995e-20	1.20977e-10	1.42897e-24
Dstn	8.42451e-19	-0.477317	0.98	0.971	1.61531e-14	8.31377e-25	-0.399938	0.98	0.971	1.59408e-20	8.42451e-19	1.66275e-24
Serpinb6a	1.56603e-10	-0.259505	0.66	0.715	3.0027e-06	1.20991e-24	-0.312141	0.734	0.775	2.31989e-20	1.56603e-10	2.41983e-24
Palld	5.25286e-15	-0.613922	0.3	0.478	1.00718e-10	1.27645e-24	-0.508918	0.361	0.53	2.44746e-20	5.25286e-15	2.5529e-24
Map1b	1.54468e-08	-0.378386	0.198	0.317	0.000296177	5.08679e-24	-0.453112	0.203	0.382	9.75341e-20	1.54468e-08	1.01736e-23
Gpm6b	4.85879e-11	-0.261066	0.382	0.515	9.31625e-07	8.35988e-24	-0.342813	0.455	0.571	1.60292e-19	4.85879e-11	1.67198e-23
Cryab	1.61924e-05	-0.262782	0.119	0.211	0.310473	9.61144e-24	-0.383427	0.14	0.327	1.8429e-19	1.61924e-05	1.92229e-23
Col5a1	1.86432e-06	-0.278211	0.567	0.578	0.0357464	1.35404e-23	-0.370369	0.58	0.663	2.59624e-19	1.86432e-06	2.70808e-23
Tpm2	2.72796e-19	-0.885281	0.943	0.943	5.2306e-15	5.46552e-23	-0.692597	0.961	0.927	1.04796e-18	2.72796e-19	1.0931e-22
Postn	1.33461e-06	-0.604605	0.207	0.32	0.0255898	1.06082e-22	-0.786329	0.243	0.419	2.03401e-18	1.33461e-06	2.12164e-22
Acaa2	5.60552e-17	-0.374247	0.79	0.817	1.0748e-12	1.71312e-22	-0.318536	0.83	0.83	3.28474e-18	5.60552e-17	3.42625e-22
Tgfb1i1	3.94851e-22	-0.422803	0.626	0.742	7.57087e-18	3.09323e-22	-0.291173	0.742	0.779	5.93096e-18	3.94851e-22	6.18646e-22
Cd248	6.8832e-14	-0.352531	0.388	0.524	1.31978e-09	6.65492e-22	-0.292493	0.527	0.603	1.27601e-17	6.8832e-14	1.33098e-21
Rarres2	9.079e-22	-0.475844	0.592	0.74	1.74081e-17	1.56992e-19	-0.350486	0.66	0.71	3.01017e-15	1.56992e-19	1.8158e-21
Lpp	1.42638e-14	-0.331238	0.513	0.619	2.73495e-10	1.91318e-21	-0.291644	0.542	0.635	3.66833e-17	1.42638e-14	3.82635e-21
Mxra8	2.8295e-09	-0.273941	0.47	0.537	5.42529e-05	2.56216e-21	-0.303959	0.516	0.613	4.91269e-17	2.8295e-09	5.12432e-21
Tinagl1	2.23524e-12	-0.5534	0.076	0.233	4.28586e-08	3.2753e-21	-0.455381	0.07	0.226	6.28006e-17	2.23524e-12	6.5506e-21
Zeb2	6.66107e-15	-0.393507	0.796	0.877	1.27719e-10	6.56751e-21	-0.365221	0.751	0.853	1.25926e-16	6.66107e-15	1.3135e-20
Arid5b	1.43077e-15	-0.348757	0.805	0.857	2.74336e-11	9.3553e-20	-0.267007	0.8	0.816	1.79378e-15	1.43077e-15	1.87106e-19
Plpp3	9.29595e-07	-0.348894	0.224	0.321	0.0178241	9.99736e-20	-0.460678	0.252	0.399	1.91689e-15	9.29595e-07	1.99947e-19
Col6a3	2.71412e-05	-0.258908	0.632	0.618	0.520406	4.08052e-19	-0.338058	0.622	0.666	7.824e-15	2.71412e-05	8.16105e-19
Lum	8.75568e-06	-0.502027	0.136	0.237	0.167881	5.83038e-19	-0.660446	0.214	0.374	1.11792e-14	8.75568e-06	1.16608e-18
Ndufa4l2	9.42602e-14	-0.746112	0.561	0.66	1.80735e-09	1.21507e-18	-0.731519	0.455	0.544	2.32978e-14	9.42602e-14	2.43014e-18
Gpx1	6.01464e-10	-0.251211	0.836	0.826	1.15325e-05	7.73769e-18	-0.277531	0.891	0.865	1.48363e-13	6.01464e-10	1.54754e-17
Vstm4	1.11214e-10	-0.322275	0.507	0.573	2.13241e-06	9.59759e-18	-0.282129	0.539	0.617	1.84024e-13	1.11214e-10	1.91952e-17
Atp2b1	9.28133e-11	-0.413348	0.867	0.86	1.7796e-06	1.11078e-17	-0.372752	0.901	0.892	2.12981e-13	9.28133e-11	2.22156e-17
Pcolce	1.92724e-08	-0.328898	0.717	0.729	0.000369529	2.21126e-17	-0.346063	0.781	0.781	4.23987e-13	1.92724e-08	4.42251e-17
Lmod1	8.06582e-11	-0.332315	0.042	0.178	1.54654e-06	2.83424e-17	-0.29438	0.038	0.163	5.43438e-13	8.06582e-11	5.66849e-17
Maf	7.77366e-07	-0.304472	0.181	0.287	0.0149052	4.97235e-17	-0.36885	0.225	0.367	9.53398e-13	7.77366e-07	9.94469e-17
Btg1	7.41679e-14	-0.4383	0.711	0.751	1.4221e-09	6.36266e-17	-0.352376	0.715	0.726	1.21998e-12	7.41679e-14	1.27253e-16
Fn1	2.17919e-14	-0.421068	0.836	0.859	4.17838e-10	1.44591e-16	-0.359742	0.935	0.899	2.77239e-12	2.17919e-14	2.89182e-16
Bst2	2.77205e-12	-0.384395	0.272	0.437	5.31512e-08	2.07872e-16	-0.273574	0.214	0.367	3.98574e-12	2.77205e-12	4.15745e-16
Igf1	6.74099e-07	-0.295357	0.054	0.152	0.0129252	4.0647e-16	-0.565283	0.158	0.296	7.79365e-12	6.74099e-07	8.1294e-16
Filip1l	5.92825e-13	-0.420006	0.691	0.716	1.13668e-08	1.17027e-15	-0.309218	0.514	0.588	2.24388e-11	5.92825e-13	2.34055e-15
Nexn	2.13237e-12	-0.545739	0.351	0.481	4.0886e-08	1.22521e-15	-0.435743	0.387	0.49	2.34922e-11	2.13237e-12	2.45042e-15
Des	1.04517e-13	-0.488042	0.334	0.486	2.004e-09	1.97374e-15	-0.313678	0.235	0.357	3.78445e-11	1.04517e-13	3.94748e-15
Tshz2	0.00104397	-0.275978	0.884	0.816	1	2.14114e-15	-0.381562	0.923	0.877	4.10541e-11	0.00104397	4.28227e-15
Adamts1	1.10117e-06	-0.353562	0.382	0.458	0.0211137	2.46496e-15	-0.32967	0.443	0.529	4.72631e-11	1.10117e-06	4.92992e-15
H19	0.0111218	-0.279621	0.904	0.794	1	3.1037e-15	-0.407453	0.9	0.887	5.95104e-11	0.0111218	6.2074e-15
Sema3c	9.87676e-10	-0.315444	0.142	0.285	1.89377e-05	3.80865e-15	-0.297172	0.158	0.291	7.30271e-11	9.87676e-10	7.6173e-15
Dkk2	4.19025e-07	-0.679626	0.153	0.26	0.00803438	3.9234e-15	-0.633134	0.156	0.284	7.52273e-11	4.19025e-07	7.8468e-15
Cst3	1.2174e-06	-0.28507	0.946	0.927	0.0233424	5.08056e-15	-0.324373	0.97	0.954	9.74146e-11	1.2174e-06	1.01611e-14
Aspn	1.80533e-06	-0.368273	0.3	0.395	0.0346154	7.38385e-15	-0.473039	0.278	0.388	1.41578e-10	1.80533e-06	1.47677e-14
Itm2a	0.475695	-0.372156	0.391	0.341	1	9.26959e-15	-1.09184	0.42	0.495	1.77735e-10	0.475695	1.85392e-14
Pdlim3	1.09876e-14	-0.512804	0.153	0.335	2.10676e-10	1.79659e-13	-0.397535	0.156	0.275	3.44478e-09	1.79659e-13	2.19752e-14
Jun	3.36116e-14	-0.546419	0.734	0.809	6.4447e-10	1.21076e-14	-0.407476	0.762	0.813	2.32152e-10	3.36116e-14	2.42153e-14
Hspb1	5.06462e-05	-0.460456	0.36	0.402	0.97109	2.25246e-14	-0.461268	0.372	0.462	4.31888e-10	5.06462e-05	4.50493e-14
Akap12	8.36532e-13	-0.433125	0.85	0.871	1.60397e-08	2.53239e-14	-0.306564	0.874	0.871	4.85561e-10	8.36532e-13	5.06478e-14
Ctsl	1.98308e-07	-0.252868	0.946	0.905	0.00380235	4.04787e-14	-0.268886	0.95	0.921	7.76138e-10	1.98308e-07	8.09574e-14
Lox	2.4211e-07	-0.36873	0.28	0.388	0.00464222	2.45063e-13	-0.33471	0.279	0.398	4.69884e-09	2.4211e-07	4.90126e-13
Gng11	1.04209e-08	-0.470903	0.776	0.761	0.000199811	2.76628e-13	-0.352084	0.756	0.746	5.30407e-09	1.04209e-08	5.53256e-13
Mfap5	5.80822e-06	-0.451986	0.15	0.25	0.111367	5.35111e-13	-0.583915	0.178	0.302	1.02602e-08	5.80822e-06	1.07022e-12
AY036118	1.25971e-08	-0.358172	0.972	0.97	0.000241537	6.73154e-13	-0.307626	0.959	0.967	1.29071e-08	1.25971e-08	1.34631e-12
Gas6	1.19654e-09	-0.420879	0.181	0.327	2.29425e-05	7.09561e-13	-0.387946	0.27	0.381	1.36051e-08	1.19654e-09	1.41912e-12
Trps1	5.4481e-09	-0.253946	0.178	0.309	0.000104462	7.16257e-13	-0.268109	0.214	0.336	1.37335e-08	5.4481e-09	1.43251e-12
Gm13889	1.59094e-11	-0.697264	0.173	0.324	3.05048e-07	1.11459e-12	-0.568628	0.178	0.291	2.13711e-08	1.59094e-11	2.22918e-12
Col23a1	1.48094e-07	-0.26839	0.119	0.233	0.00283956	1.93754e-12	-0.263715	0.147	0.265	3.71505e-08	1.48094e-07	3.87509e-12
Cav1	1.29636e-08	-0.28073	0.028	0.133	0.000248564	2.99646e-12	-0.301922	0.059	0.159	5.74542e-08	1.29636e-08	5.99293e-12
Wnt4	0.000387087	-0.527347	0.133	0.201	1	3.45564e-12	-0.363232	0.106	0.219	6.62583e-08	0.000387087	6.91127e-12
Cnn1	1.15553e-08	-0.565591	0.025	0.13	0.000221562	5.78741e-12	-0.480991	0.035	0.126	1.10968e-07	1.15553e-08	1.15748e-11
Carmn	9.91665e-06	-0.254572	0.357	0.417	0.190142	1.17678e-11	-0.282632	0.36	0.444	2.25636e-07	9.91665e-06	2.35356e-11
Ncam1	6.26624e-08	-0.459021	0.643	0.67	0.00120149	1.73226e-11	-0.351099	0.716	0.721	3.32144e-07	6.26624e-08	3.46452e-11
Apoe	3.26728e-05	-0.377446	0.394	0.446	0.626468	2.08448e-11	-0.363615	0.56	0.602	3.99679e-07	3.26728e-05	4.16896e-11
Id4	8.14017e-09	-0.426638	0.207	0.332	0.00015608	3.48078e-11	-0.309048	0.185	0.288	6.67405e-07	8.14017e-09	6.96156e-11
Myh11	5.34209e-11	-1.11938	0.048	0.186	1.02429e-06	3.5734e-11	-1.03178	0.097	0.198	6.85164e-07	5.34209e-11	7.14681e-11
Thbs2	4.30006e-07	-0.31447	0.15	0.269	0.00824494	5.09074e-11	-0.258562	0.188	0.306	9.76098e-07	4.30006e-07	1.01815e-10
Crip1	0.0183483	-0.481174	0.578	0.545	1	6.37693e-11	-0.564252	0.593	0.618	1.22271e-06	0.0183483	1.27539e-10
Cpe	0.000141001	-0.255127	0.275	0.332	1	7.66132e-11	-0.311621	0.323	0.407	1.46898e-06	0.000141001	1.53226e-10
Col12a1	6.57323e-06	-0.278753	0.499	0.53	0.126035	1.05526e-10	-0.265318	0.467	0.524	2.02335e-06	6.57323e-06	2.11051e-10
Ckb	5.89853e-09	-0.718001	0.535	0.593	0.000113098	1.38292e-10	-0.61233	0.61	0.599	2.65161e-06	5.89853e-09	2.76584e-10
Actg2	5.97843e-07	-1.22382	0.025	0.111	0.011463	1.41206e-10	-1.02374	0.047	0.134	2.70749e-06	5.97843e-07	2.82413e-10
Nts	0.000757013	-0.901858	0.057	0.113	1	3.16036e-10	-0.758859	0.046	0.13	6.05968e-06	0.000757013	6.32073e-10
Ppp1r14a	4.15078e-10	-0.402576	0.629	0.712	7.9587e-06	1.01173e-08	-0.274158	0.499	0.561	0.00019399	1.01173e-08	8.30155e-10
Csrp2	1.42972e-07	-0.427345	0.858	0.826	0.00274134	1.30239e-09	-0.4455	0.894	0.86	2.49721e-05	1.42972e-07	2.60479e-09
Sema5a	2.64589e-08	-0.279699	0.374	0.472	0.000507323	2.05468e-09	-0.256358	0.445	0.492	3.93965e-05	2.64589e-08	4.10936e-09
Itga1	2.56483e-05	-0.34048	0.484	0.511	0.49178	2.61397e-09	-0.371652	0.478	0.496	5.01203e-05	2.56483e-05	5.22794e-09
Phlda1	9.31567e-06	-0.31849	0.351	0.415	0.178619	4.86299e-09	-0.280305	0.358	0.436	9.3243e-05	9.31567e-06	9.72598e-09
G0s2	4.86636e-06	-0.450486	0.632	0.658	0.0933075	5.41734e-09	-0.41566	0.564	0.583	0.000103872	4.86636e-06	1.08347e-08
Sparcl1	0.000218916	-0.439755	0.615	0.59	1	9.37083e-09	-0.382669	0.716	0.695	0.000179676	0.000218916	1.87417e-08
Col15a1	7.8713e-07	-0.3781	0.19	0.304	0.0150924	1.01875e-08	-0.326262	0.231	0.319	0.000195335	7.8713e-07	2.0375e-08
Cited2	0.000954235	-0.284386	0.649	0.608	1	1.51879e-08	-0.332124	0.645	0.627	0.000291213	0.000954235	3.03758e-08
Arl4a	0.0051399	-0.296347	0.578	0.534	1	1.93368e-08	-0.316894	0.546	0.559	0.000370764	0.0051399	3.86736e-08
Akr1b7	2.55311e-06	-0.558319	0.034	0.116	0.0489534	2.40822e-08	-0.637453	0.038	0.106	0.000461752	2.55311e-06	4.81644e-08
Pmepa1	0.0214395	-0.339366	0.691	0.605	1	6.73962e-08	-0.329246	0.707	0.668	0.00129225	0.0214395	1.34792e-07
Crip2	0.0158448	-0.336127	0.45	0.437	1	8.16535e-08	-0.357768	0.508	0.518	0.00156562	0.0158448	1.63307e-07
2022-09-04	0.00262399	-0.30277	0.334	0.363	1	1.15624e-07	-0.312301	0.253	0.319	0.00221697	0.00262399	2.31247e-07
Mfap4	0.0474089	-0.345132	0.81	0.694	1	1.20934e-07	-0.423369	0.83	0.756	0.00231879	0.0474089	2.41868e-07
Cox4i2	2.90126e-06	-0.45387	0.297	0.379	0.0556288	8.28361e-06	-0.331449	0.22	0.276	0.15883	8.28361e-06	5.80252e-06
Gata3	0.000406985	-0.327611	0.091	0.156	1	7.83799e-06	-0.26119	0.093	0.151	0.150286	0.000406985	1.56759e-05
Btg2	8.89887e-06	-0.333936	0.657	0.688	0.170627	1.60333e-05	-0.315214	0.639	0.637	0.307422	1.60333e-05	1.77977e-05
Ptp4a3	1.56141e-05	-0.674706	0.258	0.334	0.299384	2.74476e-05	-0.414651	0.3	0.34	0.526281	2.74476e-05	3.12279e-05
Cdc42ep3	2.81688e-05	-0.332037	0.564	0.579	0.540108	0.00179154	-0.267423	0.545	0.525	1	0.00179154	5.63368e-05
Ccnd1	0.000103335	-0.304363	0.561	0.559	1	4.61515e-05	-0.278577	0.624	0.575	0.884909	0.000103335	9.23009e-05
Cxcl12	0.00275495	-0.303129	0.425	0.464	1	0.000130817	-0.271725	0.508	0.544	1	0.00275495	0.000261617
Junb	0.000160863	-0.304357	0.83	0.803	1	0.00029826	-0.285983	0.788	0.729	1	0.00029826	0.000321701
Cebpd	0.000204361	-0.323064	0.558	0.56	1	0.000433893	-0.27871	0.555	0.536	1	0.000433893	0.00040868
Pfn2	0.0167117	-0.435208	0.493	0.467	1	0.0003733	-0.391828	0.569	0.534	1	0.0167117	0.000746461
Fbln5	0.00240201	-0.319559	0.64	0.602	1	0.00538924	-0.280356	0.73	0.645	1	0.00538924	0.00479826
Rasl11a	0.00841123	-0.301026	0.632	0.565	1	0.0114922	-0.270134	0.616	0.538	1	0.0114922	0.0167517
Dlk1	0.010099	-0.515928	0.436	0.314	1	0.268244	-1.18031	0.56	0.47	1	0.268244	0.020096
Eln	0.294211	-0.309896	0.348	0.323	1	0.0118741	-0.279989	0.384	0.386	1	0.294211	0.0236073
Fabp5	0.964386	-0.462328	0.64	0.547	1	0.0565914	-0.453888	0.7	0.628	1	0.964386	0.10998
Tm4sf1	0.0915703	-0.577802	0.663	0.561	1	0.677837	-0.411734	0.659	0.535	1	0.677837	0.174756
Mef2c	0.220546	-0.403296	0.632	0.461	1	0.249829	-0.373506	0.569	0.457	1	0.249829	0.392451
Rgs5	0.550386	-0.379249	0.677	0.564	1	0.946611	-0.391145	0.499	0.415	1	0.946611	0.797847

## Sheet: Stroma_Subcluster.1.Mut.CTRL.m
Gene	CTRL_p_val	CTRL_avg_logFC	CTRL_pct.1	CTRL_pct.2	CTRL_p_val_adj	Mutant_p_val	Mutant_avg_logFC	Mutant_pct.1	Mutant_pct.2	Mutant_p_val_adj	max_pval	minimump_p_val
Snai2	1.05091e-27	0.479368	0.852	0.605	2.01502e-23	2.53951e-61	0.506721	0.931	0.628	4.86925e-57	1.05091e-27	5.07901e-61
Tcf21	1.09448e-15	0.283854	0.93	0.743	2.09855e-11	6.48731e-48	0.43193	0.943	0.667	1.24388e-43	1.09448e-15	1.29746e-47
Frem1	1.0925e-16	0.267557	0.7	0.433	2.09475e-12	2.26641e-42	0.339614	0.746	0.419	4.34561e-38	1.0925e-16	4.53282e-42
Plac8	8.89353e-17	0.316986	0.868	0.615	1.70525e-12	7.42554e-42	0.458871	0.86	0.572	1.42377e-37	8.89353e-17	1.48511e-41
Emilin1	8.82088e-23	0.356321	0.977	0.869	1.69132e-18	8.16336e-40	0.33074	0.985	0.896	1.56524e-35	8.82088e-23	1.63267e-39
Gpc3	1.19595e-15	0.283644	0.992	0.973	2.29312e-11	1.80874e-36	0.316022	0.998	0.97	3.46807e-32	1.19595e-15	3.61747e-36
Aes	3.62321e-18	-0.418375	0.591	0.793	6.94714e-14	4.69948e-36	-0.477997	0.628	0.854	9.01078e-32	3.62321e-18	9.39895e-36
Rbp1	3.40601e-15	0.272864	0.961	0.895	6.53068e-11	1.91166e-35	0.30772	0.993	0.939	3.66542e-31	3.40601e-15	3.82333e-35
Sec61b	1.78966e-19	0.300648	1	0.956	3.43149e-15	3.42848e-31	0.258198	0.993	0.973	6.57377e-27	1.78966e-19	6.85696e-31
Malat1	2.55419e-23	-0.444079	1	1	4.89741e-19	1.14331e-30	-0.439101	1	1	2.19218e-26	2.55419e-23	2.28662e-30
Ptn	2.64271e-30	0.548752	0.996	0.93	5.06713e-26	1.97107e-30	0.415987	0.995	0.944	3.77933e-26	2.64271e-30	3.94214e-30
Gucy1a1	1.07832e-15	0.288093	0.988	0.872	2.06756e-11	1.03543e-28	0.308708	0.98	0.775	1.98534e-24	1.07832e-15	2.07087e-28
Postn	1.80642e-16	-0.910464	0.086	0.336	3.46363e-12	5.35904e-28	-1.06805	0.153	0.415	1.02754e-23	1.80642e-16	1.07181e-27
Ccnd2	1.72331e-15	0.272632	0.977	0.881	3.30427e-11	9.33622e-28	0.303693	0.983	0.901	1.79013e-23	1.72331e-15	1.86724e-27
Marcks	6.77952e-21	0.287618	0.996	0.961	1.2999e-16	9.34509e-26	0.25685	0.995	0.98	1.79183e-21	6.77952e-21	1.86902e-25
Lmna	4.53936e-14	-0.419279	0.455	0.687	8.70377e-10	7.20485e-25	-0.45847	0.567	0.743	1.38146e-20	4.53936e-14	1.44097e-24
Sfrp2	2.65454e-14	-0.712294	0.074	0.294	5.08982e-10	1.24834e-24	-0.811254	0.113	0.35	2.39357e-20	2.65454e-14	2.49668e-24
Igfbp5	1.99863e-24	-1.14698	0.245	0.577	3.83218e-20	3.28665e-18	-0.789384	0.392	0.585	6.30182e-14	3.28665e-18	3.99726e-24
Pkdcc	1.5151e-13	0.318262	0.899	0.819	2.90505e-09	5.65281e-23	0.317869	0.953	0.859	1.08387e-18	1.5151e-13	1.13056e-22
Gsn	2.96805e-15	-0.599679	0.654	0.795	5.69094e-11	5.83478e-22	-0.653725	0.776	0.842	1.11876e-17	2.96805e-15	1.16696e-21
Ecm1	5.10935e-10	0.266972	0.848	0.703	9.79668e-06	1.09757e-21	0.299556	0.823	0.623	2.10448e-17	5.10935e-10	2.19514e-21
Cryab	1.98185e-09	-0.334697	0.058	0.216	3.8e-05	3.55214e-21	-0.463992	0.099	0.314	6.81088e-17	1.98185e-09	7.10428e-21
Prc1	2.29906e-13	-0.6037	0.082	0.289	4.40823e-09	3.0342e-20	-0.556067	0.116	0.326	5.81778e-16	2.29906e-13	6.0684e-20
Cavin3	1.1447e-06	-0.492658	0.339	0.453	0.0219485	5.52968e-20	-0.58497	0.394	0.567	1.06026e-15	1.1447e-06	1.10594e-19
Pbk	3.78684e-13	-0.29706	0.054	0.256	7.26088e-09	1.34552e-18	-0.280243	0.094	0.294	2.57991e-14	3.78684e-13	2.69105e-18
Cst3	1.98091e-06	-0.337417	0.907	0.936	0.037982	1.57804e-18	-0.454833	0.938	0.961	3.02573e-14	1.98091e-06	3.15608e-18
Ndrg2	4.57784e-15	-0.407936	0.093	0.327	8.77755e-11	1.46884e-17	-0.347133	0.153	0.348	2.81635e-13	4.57784e-15	2.93768e-17
Incenp	1.3378e-11	-0.344993	0.105	0.298	2.5651e-07	3.65985e-17	-0.341856	0.145	0.338	7.0174e-13	1.3378e-11	7.31971e-17
Sgo2a	2.10813e-12	-0.28486	0.043	0.232	4.04214e-08	5.34433e-17	-0.276557	0.086	0.271	1.02472e-12	2.10813e-12	1.06887e-16
Kif22	3.82289e-11	-0.312738	0.089	0.275	7.33001e-07	1.14082e-16	-0.30537	0.128	0.318	2.1874e-12	3.82289e-11	2.28163e-16
Hmmr	1.01226e-11	-0.412531	0.062	0.252	1.94091e-07	2.81915e-16	-0.41279	0.111	0.293	5.40543e-12	1.01226e-11	5.63829e-16
Hjurp	2.69654e-14	-0.421174	0.253	0.474	5.17034e-10	3.55526e-16	-0.339624	0.382	0.531	6.81685e-12	2.69654e-14	7.11052e-16
Pmepa1	0.000470871	-0.329887	0.568	0.637	1	7.93248e-16	-0.433286	0.557	0.699	1.52097e-11	0.000470871	1.5865e-15
Arl6ip1	2.01263e-10	-0.672815	0.525	0.645	3.85902e-06	1.06495e-15	-0.598555	0.544	0.671	2.04194e-11	2.01263e-10	2.12991e-15
Aurkb	2.12515e-11	-0.358655	0.078	0.263	4.07476e-07	1.16659e-15	-0.362593	0.131	0.3	2.23682e-11	2.12515e-11	2.33318e-15
Knl1	7.37313e-12	-0.301958	0.062	0.253	1.41372e-07	3.1127e-15	-0.273042	0.111	0.287	5.9683e-11	7.37313e-12	6.22541e-15
Spc25	2.38177e-10	-0.460763	0.222	0.392	4.5668e-06	3.86128e-15	-0.47242	0.259	0.411	7.40361e-11	2.38177e-10	7.72256e-15
Ckap2l	4.13548e-12	-0.313141	0.07	0.264	7.92937e-08	5.86934e-15	-0.294585	0.126	0.304	1.12539e-10	4.13548e-12	1.17387e-14
Pimreg	1.17641e-10	-0.253229	0.054	0.231	2.25566e-06	7.90833e-15	-0.258578	0.094	0.269	1.51634e-10	1.17641e-10	1.58167e-14
Nusap1	9.81585e-15	-0.66572	0.089	0.316	1.88209e-10	2.70541e-14	-0.564512	0.17	0.33	5.18734e-10	2.70541e-14	1.96317e-14
Nrp1	2.83058e-06	-0.385609	0.619	0.721	0.0542736	1.37589e-14	-0.340409	0.594	0.739	2.63814e-10	2.83058e-06	2.75179e-14
Kif23	4.15419e-10	-0.294066	0.07	0.24	7.96525e-06	1.53691e-14	-0.318541	0.113	0.281	2.94687e-10	4.15419e-10	3.07382e-14
Kif11	4.09282e-12	-0.290228	0.054	0.245	7.84758e-08	1.63342e-14	-0.253428	0.086	0.25	3.13191e-10	4.09282e-12	3.26683e-14
Dlk1	0.155157	-0.778257	0.327	0.346	1	1.99073e-14	-1.50153	0.35	0.516	3.81702e-10	0.155157	3.98146e-14
Igf1	2.05279e-06	-0.304373	0.039	0.148	0.0393603	4.12951e-14	-0.587991	0.121	0.288	7.91793e-10	2.05279e-06	8.25903e-14
Col1a1	5.5608e-06	-0.786558	0.961	0.905	0.106623	9.02974e-14	-0.907644	0.978	0.938	1.73136e-09	5.5608e-06	1.80595e-13
Cdk1	1.20986e-13	-0.607484	0.288	0.486	2.31978e-09	9.32639e-14	-0.558747	0.429	0.546	1.78824e-09	1.20986e-13	1.86528e-13
Fbxo5	4.64547e-12	-0.344881	0.086	0.283	8.90723e-08	2.50257e-13	-0.2856	0.153	0.316	4.79842e-09	4.64547e-12	5.00514e-13
Ccna2	5.12983e-10	-0.395842	0.136	0.314	9.83594e-06	3.96411e-13	-0.367635	0.207	0.365	7.60078e-09	5.12983e-10	7.92821e-13
Igfbp7	4.06935e-13	-0.518537	0.911	0.953	7.80258e-09	1.91357e-11	-0.43698	0.963	0.949	3.66908e-07	1.91357e-11	8.1387e-13
Iqgap1	1.52299e-08	-0.280133	0.432	0.6	0.000292018	4.61881e-13	-0.252554	0.493	0.64	8.8561e-09	1.52299e-08	9.23762e-13
Cks1b	2.4672e-09	-0.420709	0.638	0.711	4.73061e-05	7.243e-13	-0.328936	0.761	0.789	1.38877e-08	2.4672e-09	1.4486e-12
Racgap1	1.07957e-07	-0.283979	0.156	0.307	0.00206997	3.30036e-12	-0.305507	0.207	0.358	6.32811e-08	1.07957e-07	6.60072e-12
Tpx2	3.73445e-12	-0.462605	0.125	0.334	7.16043e-08	3.73631e-07	-0.377859	0.251	0.34	0.007164	3.73631e-07	7.46889e-12
Cavin2	5.81401e-12	-0.375494	0.031	0.214	1.11478e-07	2.95134e-11	-0.302649	0.064	0.192	5.65891e-07	2.95134e-11	1.1628e-11
Hist1h1b	4.56957e-07	-1.0052	0.253	0.387	0.0087617	6.20389e-12	-1.06166	0.293	0.422	1.18953e-07	4.56957e-07	1.24078e-11
Top2a	1.39421e-11	-0.991123	0.249	0.422	2.67326e-07	1.99215e-10	-0.821977	0.382	0.465	3.81974e-06	1.99215e-10	2.78842e-11
Smc4	1.87066e-09	-0.551844	0.51	0.615	3.5868e-05	1.43465e-11	-0.481581	0.599	0.647	2.75079e-07	1.87066e-09	2.86929e-11
Sparc	0.00377426	-0.399344	0.984	0.988	1	1.43942e-11	-0.608532	0.998	0.996	2.75995e-07	0.00377426	2.87885e-11
Cav1	3.34762e-08	-0.27273	0.012	0.129	0.000641872	1.92178e-11	-0.284386	0.032	0.153	3.68481e-07	3.34762e-08	3.84355e-11
Ppp1r12a	2.48197e-11	-0.455029	0.611	0.778	4.75892e-07	1.21327e-08	-0.277365	0.704	0.783	0.000232632	1.21327e-08	4.96393e-11
Cdca8	7.99204e-09	-0.471879	0.198	0.357	0.000153239	2.66831e-11	-0.437607	0.266	0.398	5.11621e-07	7.99204e-09	5.33661e-11
Itm2a	7.31574e-07	-0.465894	0.226	0.379	0.0140272	2.95863e-11	-1.07261	0.367	0.496	5.67289e-07	7.31574e-07	5.91727e-11
Smoc2	3.71877e-11	-0.449203	0.027	0.193	7.13038e-07	1.7801e-09	-0.419052	0.143	0.268	3.41316e-05	1.7801e-09	7.43755e-11
Plpp3	9.71743e-07	-0.32502	0.179	0.323	0.0186322	4.17704e-11	-0.421481	0.246	0.384	8.00906e-07	9.71743e-07	8.35409e-11
Cenpe	5.06923e-07	-0.404126	0.175	0.314	0.00971974	4.81722e-11	-0.444783	0.217	0.36	9.23654e-07	5.06923e-07	9.63445e-11
Tinagl1	5.98706e-11	-0.514465	0.051	0.226	1.14796e-06	1.22608e-10	-0.377544	0.076	0.208	2.35089e-06	1.22608e-10	1.19741e-10
Hist1h4d	6.97507e-11	-0.403782	0.206	0.402	1.3374e-06	8.36682e-06	-0.308805	0.323	0.397	0.160425	8.36682e-06	1.39501e-10
Rgs2	1.22717e-06	-0.339822	0.051	0.163	0.0235297	1.21188e-10	-0.254612	0.054	0.176	2.32365e-06	1.22717e-06	2.42376e-10
Dkk1	1.04071e-06	0.32854	0.374	0.239	0.0199545	1.38421e-10	0.410214	0.357	0.214	2.65409e-06	1.04071e-06	2.76842e-10
Ube2c	2.59966e-07	-0.861215	0.272	0.408	0.00498459	2.12936e-10	-0.892409	0.34	0.447	4.08284e-06	2.59966e-07	4.25873e-10
Tagln	2.94534e-10	-1.51337	0.385	0.531	5.64739e-06	0.00137811	-1.06743	0.527	0.514	1	0.00137811	5.89068e-10
Smc2	3.92248e-10	-0.544917	0.354	0.491	7.52096e-06	6.17031e-10	-0.416462	0.466	0.538	1.1831e-05	6.17031e-10	7.84496e-10
Mef2c	8.25987e-10	-0.583212	0.35	0.532	1.58375e-05	4.47577e-08	-0.505363	0.401	0.498	0.000858183	4.47577e-08	1.65197e-09
Gm13889	8.95559e-10	-0.622741	0.14	0.319	1.71715e-05	1.27586e-07	-0.539293	0.175	0.279	0.00244633	1.27586e-07	1.79112e-09
Lmod1	1.01153e-09	-0.294177	0.023	0.171	1.9395e-05	1.48323e-09	-0.257369	0.042	0.149	2.84395e-05	1.48323e-09	2.02305e-09
Ccnb1	2.96138e-07	-0.427498	0.121	0.26	0.00567815	1.47446e-09	-0.405037	0.192	0.319	2.82713e-05	2.96138e-07	2.94892e-09
Tpm1	1.85721e-09	-0.661598	0.872	0.929	3.56102e-05	0.114152	-0.327672	0.946	0.935	1	0.114152	3.71442e-09
Mylk	6.22926e-09	-0.740878	0.732	0.834	0.00011944	0.0186641	-0.625802	0.823	0.815	1	0.0186641	1.24585e-08
Mki67	9.63819e-09	-0.662335	0.23	0.372	0.000184803	6.1403e-08	-0.52967	0.345	0.42	0.00117734	6.1403e-08	1.92764e-08
Hist1h2ae	9.96285e-09	-0.839881	0.206	0.367	0.000191028	2.07049e-07	-0.957115	0.352	0.429	0.00396995	2.07049e-07	1.99257e-08
Sparcl1	3.50501e-05	-0.358905	0.514	0.613	0.672051	1.45135e-08	-0.430143	0.638	0.71	0.000278282	3.50501e-05	2.9027e-08
Hist1h2ap	1.58515e-08	-1.42231	0.304	0.447	0.000303937	2.25028e-05	-1.49734	0.626	0.634	0.431468	2.25028e-05	3.1703e-08
Myh11	2.09897e-08	-1.08075	0.043	0.177	0.000402456	4.70884e-07	-0.957159	0.094	0.188	0.00902873	4.70884e-07	4.19794e-08
Map1b	1.21803e-07	-0.341151	0.163	0.315	0.00233545	2.16144e-08	-0.34979	0.239	0.357	0.000414435	1.21803e-07	4.32288e-08
Dkk2	2.74957e-05	-0.598872	0.14	0.255	0.527202	2.28915e-08	-0.45123	0.15	0.272	0.000438921	2.74957e-05	4.5783e-08
Lum	3.57773e-06	-0.747786	0.117	0.233	0.0685994	2.49312e-08	-0.790053	0.241	0.352	0.000478032	3.57773e-06	4.98625e-08
Fabp5	1.48292e-06	-0.672017	0.455	0.592	0.0284336	4.74548e-08	-0.582284	0.586	0.655	0.000909899	1.48292e-06	9.49097e-08
Cnn1	6.08031e-08	-0.549721	0.012	0.125	0.00116584	3.24073e-07	-0.43154	0.034	0.116	0.00621378	3.24073e-07	1.21606e-07
Btg2	7.01048e-08	-0.451023	0.576	0.703	0.00134419	0.00074197	-0.298927	0.596	0.644	1	0.00074197	1.4021e-07
Tyms	1.95776e-07	-0.391671	0.339	0.465	0.00375382	8.15127e-08	-0.363627	0.485	0.558	0.00156292	1.95776e-07	1.63025e-07
Mfap5	8.65672e-08	-0.548555	0.109	0.251	0.00165984	7.26364e-06	-0.627365	0.2	0.285	0.139273	7.26364e-06	1.73134e-07
Apoe	6.49033e-07	-0.448957	0.3	0.461	0.0124446	9.27588e-08	-0.435183	0.517	0.605	0.00177856	6.49033e-07	1.85518e-07
Cdc20	5.27529e-06	-0.429653	0.144	0.272	0.101148	1.32926e-07	-0.435536	0.224	0.334	0.00254873	5.27529e-06	2.65853e-07
H2afx	1.55653e-07	-0.646116	0.518	0.613	0.0029845	4.76959e-05	-0.480397	0.675	0.673	0.914521	4.76959e-05	3.11307e-07
Pdlim3	2.84662e-07	-0.399188	0.171	0.318	0.00545811	0.0133531	-0.261143	0.212	0.253	1	0.0133531	5.69324e-07
Dcn	0.0296564	-1.17558	0.541	0.547	1	4.79705e-07	-1.28889	0.692	0.671	0.00919786	0.0296564	9.5941e-07
Spc24	5.61802e-07	-0.420187	0.288	0.406	0.010772	4.22537e-05	-0.311834	0.436	0.47	0.810171	4.22537e-05	1.1236e-06
Cks2	4.86518e-06	-0.499713	0.35	0.465	0.0932849	7.19639e-07	-0.49585	0.49	0.532	0.0137984	4.86518e-06	1.43928e-06
Hist1h1e	2.3383e-06	-0.52154	0.521	0.606	0.0448346	1.10996e-06	-0.546935	0.589	0.592	0.0212824	2.3383e-06	2.21992e-06
Cenpf	1.28222e-06	-0.70751	0.198	0.33	0.0245853	2.47863e-06	-0.704742	0.298	0.373	0.0475252	2.47863e-06	2.56444e-06
Birc5	2.09089e-05	-0.512806	0.311	0.404	0.400908	1.77604e-06	-0.433003	0.409	0.47	0.0340538	2.09089e-05	3.55208e-06
Ube2s	7.58825e-06	-0.353309	0.895	0.895	0.145497	1.97933e-06	-0.303266	0.938	0.926	0.0379517	7.58825e-06	3.95866e-06
Ptp4a3	2.37423e-06	-0.630823	0.198	0.34	0.0455236	8.29716e-05	-0.391252	0.264	0.342	1	8.29716e-05	4.74846e-06
Col4a1	3.31435e-06	-0.331576	0.86	0.888	0.0635493	0.0299306	-0.281503	0.938	0.874	1	0.0299306	6.62869e-06
Cxcl12	0.000222837	-0.290038	0.366	0.473	1	4.29705e-06	-0.261908	0.461	0.548	0.0823916	0.000222837	8.59407e-06
Cited2	1.82681e-05	-0.292009	0.518	0.638	0.350272	4.32835e-06	-0.254267	0.569	0.642	0.0829919	1.82681e-05	8.65669e-06
Thbs2	0.000400436	-0.263176	0.167	0.256	1	4.56458e-06	-0.278463	0.2	0.292	0.0875212	0.000400436	9.12913e-06
Hspb1	4.93776e-06	-0.406449	0.272	0.417	0.0946767	0.0368085	-0.300185	0.431	0.442	1	0.0368085	9.8755e-06
Pclaf	6.6887e-06	-0.655336	0.401	0.47	0.128249	0.00140966	-0.421908	0.554	0.53	1	0.00140966	1.33773e-05
Jpt1	0.000988329	-0.265096	0.661	0.723	1	7.73562e-06	-0.262222	0.815	0.796	0.148323	0.000988329	1.54712e-05
Csrp2	3.10243e-05	-0.427279	0.782	0.844	0.594861	0.00337451	-0.394632	0.889	0.865	1	0.00337451	6.20477e-05
Meg3	0.0859295	-0.5257	0.774	0.787	1	9.30908e-05	-0.857662	0.897	0.87	1	0.0859295	0.000186173
Mfap4	0.00162129	-0.363717	0.724	0.721	1	9.84269e-05	-0.400355	0.781	0.773	1	0.00162129	0.000196844
Gas1	0.000667494	-0.26109	0.63	0.681	1	0.000113645	-0.33622	0.64	0.661	1	0.000667494	0.000227276
Itga1	0.000329008	-0.29831	0.436	0.519	1	0.000221411	-0.301022	0.463	0.497	1	0.000329008	0.000442774
Cdkn1c	0.000269146	-0.83311	0.981	0.973	1	0.185384	-0.466642	0.995	0.991	1	0.185384	0.000538219
Tm4sf1	0.0102909	-0.432699	0.541	0.594	1	0.000368621	-0.431754	0.544	0.568	1	0.0102909	0.000737107
Crip1	0.0794699	-0.453478	0.537	0.556	1	0.000504774	-0.532654	0.574	0.618	1	0.0794699	0.00100929
Eln	0.0529526	-0.278876	0.28	0.339	1	0.000849411	-0.341356	0.333	0.394	1	0.0529526	0.0016981
Acta2	0.00147918	-1.12723	0.825	0.827	1	0.219649	-0.728486	0.916	0.854	1	0.219649	0.00295617
Hmgb2	0.00346695	-0.624852	0.907	0.875	1	0.0196419	-0.545646	0.936	0.884	1	0.0196419	0.00692187
Gas6	0.00674297	-0.311967	0.241	0.303	1	0.00385561	-0.280357	0.31	0.362	1	0.00674297	0.00769635
Col3a1	0.773973	-0.396191	1	0.93	1	0.00643944	-0.538299	0.995	0.965	1	0.773973	0.0128374
Rgs5	0.0617315	-0.388045	0.588	0.592	1	0.008342	-0.421353	0.419	0.438	1	0.0617315	0.0166144
Cox4i2	0.215222	-0.324031	0.354	0.361	1	0.0110997	-0.304532	0.229	0.269	1	0.215222	0.0220762
Tpm2	0.0473866	-0.634138	0.961	0.94	1	0.0381386	-0.333647	0.985	0.926	1	0.0473866	0.0748227
Col1a2	0.146748	-0.336908	0.996	0.969	1	0.411408	-0.528015	0.998	0.98	1	0.411408	0.27196
Ndufa4l2	0.771328	-0.325689	0.712	0.621	1	0.200556	-0.453175	0.554	0.518	1	0.771328	0.36089

## Sheet: Stroma_Subcluster.2.Mut.CTRL.m
Gene	CTRL_p_val	CTRL_avg_logFC	CTRL_pct.1	CTRL_pct.2	CTRL_p_val_adj	Mutant_p_val	Mutant_avg_logFC	Mutant_pct.1	Mutant_pct.2	Mutant_p_val_adj	max_pval	minimump_p_val
Alx1	8.59916e-104	0.972622	0.828	0.206	1.6488e-99	1.75617e-176	0.97273	0.911	0.259	3.36727e-172	8.59916e-104	3.51233e-176
Tmsb4x	3.24307e-91	0.990804	1	0.999	6.21827e-87	5.3345e-143	1.07288	1	1	1.02284e-138	3.24307e-91	1.0669e-142
Nav3	2.09959e-75	0.712517	0.545	0.095	4.02576e-71	5.08441e-142	0.783485	0.706	0.158	9.74885e-138	2.09959e-75	1.01688e-141
Ncam1	1.39635e-108	1.25392	0.996	0.599	2.67737e-104	8.65175e-141	1.07628	0.989	0.68	1.65889e-136	1.39635e-108	1.73035e-140
Col15a1	3.12098e-140	1.23022	0.881	0.16	5.98416e-136	1.38219e-136	0.991352	0.789	0.224	2.65021e-132	1.38219e-136	6.24196e-140
Cxcl14	6.08555e-79	0.957601	0.492	0.062	1.16684e-74	2.13673e-137	0.810922	0.447	0.042	4.09697e-133	6.08555e-79	4.27347e-137
Zfp536	1.63042e-74	0.508632	0.496	0.068	3.12616e-70	3.79848e-129	0.519383	0.583	0.099	7.28321e-125	1.63042e-74	7.59697e-129
Palld	1.09703e-108	1.3349	0.922	0.342	2.10344e-104	1.80374e-128	1.09816	0.919	0.426	3.4585e-124	1.09703e-108	3.60749e-128
Gas6	6.78421e-111	1.24738	0.803	0.193	1.3008e-106	1.89128e-128	1.09715	0.817	0.285	3.62634e-124	6.78421e-111	3.78256e-128
Negr1	3.26189e-91	0.91921	0.799	0.235	6.25436e-87	2.78453e-125	0.752189	0.772	0.245	5.33906e-121	3.26189e-91	5.56906e-125
Col23a1	4.66034e-93	0.707439	0.672	0.115	8.93574e-89	3.33645e-124	0.771411	0.692	0.169	6.3973e-120	4.66034e-93	6.67289e-124
Nts	8.06551e-85	2.07063	0.434	0.035	1.54648e-80	3.82246e-115	1.82463	0.447	0.06	7.32919e-111	8.06551e-85	7.64492e-115
Cfh	5.32045e-80	0.963893	0.996	0.812	1.02014e-75	1.02507e-112	0.912597	0.992	0.752	1.96546e-108	5.32045e-80	2.05013e-112
Dach2	3.09213e-112	0.594741	0.541	0.038	5.92884e-108	2.76974e-97	0.396236	0.403	0.055	5.31069e-93	2.76974e-97	6.18425e-112
Foxl1	1.98918e-47	0.390868	0.418	0.081	3.81405e-43	1.2938e-110	0.410232	0.553	0.103	2.48073e-106	1.98918e-47	2.5876e-110
Pfn2	5.56716e-70	1.43502	0.811	0.407	1.06745e-65	1.92207e-106	1.35069	0.853	0.496	3.68539e-102	5.56716e-70	3.84415e-106
Id4	3.05551e-100	1.07881	0.799	0.206	5.85863e-96	1.0172e-82	0.718282	0.639	0.207	1.95037e-78	1.0172e-82	6.11102e-100
Fn1	5.00226e-61	0.737476	0.984	0.828	9.59133e-57	1.09623e-99	0.773382	0.994	0.895	2.10191e-95	5.00226e-61	2.19246e-99
Cldn11	4.44295e-49	0.809644	0.643	0.227	8.5189e-45	4.72142e-99	0.878039	0.708	0.225	9.05286e-95	4.44295e-49	9.44285e-99
Sdc2	1.24751e-65	0.873384	0.918	0.581	2.39198e-61	5.08408e-99	0.903194	0.897	0.57	9.74821e-95	1.24751e-65	1.01682e-98
Wnt4	2.93332e-94	1.49102	0.619	0.101	5.62436e-90	1.72497e-97	1.05277	0.564	0.137	3.30745e-93	2.93332e-94	3.44993e-97
Thy1	5.77593e-54	0.417162	0.422	0.073	1.10748e-49	1.95261e-94	0.581488	0.6	0.162	3.74394e-90	5.77593e-54	3.90523e-94
Epha4	1.477e-66	0.805678	0.508	0.093	2.83199e-62	9.82882e-94	0.735655	0.522	0.119	1.88458e-89	1.477e-66	1.96576e-93
Nrxn3	1.22058e-67	0.699034	0.303	0.014	2.34034e-63	3.92676e-93	0.584805	0.367	0.046	7.52918e-89	1.22058e-67	7.85353e-93
Sostdc1	1.26755e-19	0.706108	0.27	0.083	2.4304e-15	1.83677e-92	1.04841	0.456	0.081	3.52182e-88	1.26755e-19	3.67353e-92
Fat3	5.33163e-44	0.281789	0.32	0.046	1.02229e-39	9.41452e-91	0.378499	0.464	0.086	1.80514e-86	5.33163e-44	1.8829e-90
Cd24a	5.73652e-54	0.670726	0.828	0.427	1.09992e-49	8.25749e-90	0.746543	0.844	0.459	1.58329e-85	5.73652e-54	1.6515e-89
Plcb1	2.8469e-44	0.631301	0.73	0.337	5.45864e-40	1.81682e-88	0.646277	0.753	0.297	3.48357e-84	2.8469e-44	3.63364e-88
Dclk1	1.28603e-81	0.80267	0.684	0.155	2.46583e-77	1.64578e-86	0.616084	0.675	0.214	3.15563e-82	1.28603e-81	3.29157e-86
Atp2b1	1.7077e-72	0.967285	1	0.835	3.27434e-68	2.33873e-86	0.819461	0.981	0.881	4.48428e-82	1.7077e-72	4.67746e-86
Kif26b	8.0473e-59	0.614926	0.607	0.173	1.54299e-54	1.71925e-85	0.527119	0.6	0.18	3.29648e-81	8.0473e-59	3.43849e-85
Gm45768	1.03934e-55	0.347431	0.348	0.04	1.99282e-51	9.76952e-84	0.326529	0.356	0.05	1.87321e-79	1.03934e-55	1.9539e-83
Penk	1.3086e-81	1.48676	0.943	0.568	2.50911e-77	1.55675e-79	1.23555	0.9	0.582	2.98491e-75	1.55675e-79	2.6172e-81
Prom1	5.92827e-46	0.440711	0.41	0.083	1.13669e-41	1.03118e-78	0.380502	0.444	0.095	1.97718e-74	5.92827e-46	2.06235e-78
Lrriq1	3.93107e-49	0.634221	0.574	0.166	7.53743e-45	1.359e-78	0.580078	0.561	0.155	2.60575e-74	3.93107e-49	2.718e-78
Zeb2	6.64678e-50	0.660192	0.996	0.831	1.27445e-45	1.64582e-78	0.653959	1	0.803	3.15569e-74	6.64678e-50	3.29164e-78
Tagln	2.985e-60	0.851183	0.885	0.433	5.72343e-56	1.32535e-77	0.732548	0.886	0.46	2.54123e-73	2.985e-60	2.65071e-77
Ptn	7.85399e-24	-0.70296	0.918	0.946	1.50592e-19	4.48465e-75	-1.08613	0.9	0.959	8.59886e-71	7.85399e-24	8.96929e-75
Rarres2	1.58548e-53	0.667864	0.93	0.661	3.04001e-49	1.94473e-73	0.575698	0.939	0.662	3.72883e-69	1.58548e-53	3.88947e-73
Igfbp2	7.29247e-56	1.01592	0.721	0.29	1.39826e-51	2.10984e-72	0.981449	0.697	0.314	4.04541e-68	7.29247e-56	4.21969e-72
Kcnb2	1.02791e-64	0.393577	0.443	0.061	1.97092e-60	2.43523e-72	0.370252	0.456	0.104	4.6693e-68	1.02791e-64	4.87045e-72
Trps1	3.19412e-54	0.520978	0.656	0.205	6.12441e-50	9.91743e-71	0.560332	0.672	0.252	1.90157e-66	3.19412e-54	1.98349e-70
Hoxd11	1.694e-31	0.481191	0.906	0.714	3.24808e-27	3.53001e-69	0.553401	0.967	0.709	6.76844e-65	1.694e-31	7.06002e-69
Olfml3	1.51058e-43	0.590287	0.947	0.651	2.89639e-39	1.54541e-68	0.584399	0.956	0.689	2.96317e-64	1.51058e-43	3.09082e-68
Ptch1	1.85824e-39	0.591667	0.693	0.333	3.56299e-35	3.57096e-68	0.684599	0.778	0.421	6.84696e-64	1.85824e-39	7.14192e-68
Sfrp1	1.5848e-54	0.737279	0.971	0.703	3.0387e-50	4.79542e-68	0.657847	0.989	0.768	9.19474e-64	1.5848e-54	9.59085e-68
Slc17a8	1.71364e-43	0.321249	0.172	0.004	3.28573e-39	1.05302e-67	0.303303	0.186	0.01	2.01906e-63	1.71364e-43	2.10604e-67
Nkd1	8.84774e-58	0.919519	0.816	0.469	1.69647e-53	2.17626e-66	0.713861	0.8	0.491	4.17276e-62	8.84774e-58	4.35252e-66
Sema3c	2.14328e-62	0.651324	0.652	0.173	4.10952e-58	1.38334e-65	0.482057	0.611	0.206	2.65242e-61	2.14328e-62	2.76668e-65
Cpq	9.81786e-39	0.500686	0.529	0.186	1.88248e-34	1.43981e-65	0.457053	0.611	0.228	2.76069e-61	9.81786e-39	2.87962e-65
Hoxa10	1.08121e-44	0.638506	0.918	0.74	2.0731e-40	2.08341e-64	0.623532	0.914	0.709	3.99474e-60	1.08121e-44	4.16683e-64
Kcnd3	1.27846e-40	0.287386	0.299	0.043	2.45131e-36	4.91527e-64	0.280488	0.344	0.065	9.42455e-60	1.27846e-40	9.83055e-64
Sct	1.26096e-36	0.546156	0.557	0.207	2.41777e-32	7.18708e-64	0.516709	0.564	0.194	1.37805e-59	1.26096e-36	1.43742e-63
Nfat5	8.04126e-39	0.692296	0.857	0.594	1.54183e-34	5.56624e-63	0.892887	0.844	0.595	1.06727e-58	8.04126e-39	1.11325e-62
Nnat	4.52234e-33	0.43657	0.504	0.177	8.67113e-29	4.49516e-62	0.527693	0.742	0.342	8.61903e-58	4.52234e-33	8.99033e-62
Mgp	4.42526e-31	-1.17666	0.488	0.779	8.48499e-27	3.53774e-61	-1.654	0.428	0.782	6.78326e-57	4.42526e-31	7.07547e-61
Arl4a	8.19104e-50	0.921758	0.807	0.493	1.57055e-45	4.02646e-61	0.832122	0.789	0.521	7.72034e-57	8.19104e-50	8.05293e-61
Wnt5a	3.51165e-39	0.52246	0.652	0.3	6.73323e-35	3.6813e-60	0.508157	0.689	0.319	7.05853e-56	3.51165e-39	7.36261e-60
Tcf21	3.07198e-29	0.456669	0.955	0.74	5.89021e-25	7.86817e-60	0.567498	0.964	0.669	1.50864e-55	3.07198e-29	1.57363e-59
Fgfr2	1.81841e-46	0.506112	0.537	0.162	3.48662e-42	1.04438e-59	0.413547	0.531	0.185	2.0025e-55	1.81841e-46	2.08876e-59
Dach1	1.19409e-37	0.462206	0.549	0.2	2.28955e-33	1.22754e-59	0.432981	0.581	0.214	2.35368e-55	1.19409e-37	2.45508e-59
Ebf1	4.66678e-53	-1.04687	0.529	0.885	8.94808e-49	1.52537e-58	-0.860695	0.569	0.84	2.92474e-54	4.66678e-53	3.05074e-58
Col4a2	1.35935e-25	0.398729	0.934	0.765	2.60641e-21	1.5491e-57	0.497615	0.983	0.767	2.97025e-53	1.35935e-25	3.09821e-57
Tanc1	1.1799e-31	0.495776	0.689	0.385	2.26234e-27	2.80531e-57	0.518061	0.728	0.41	5.3789e-53	1.1799e-31	5.61061e-57
Acta2	7.05908e-38	0.470274	0.963	0.8	1.35351e-33	6.19398e-57	0.360996	0.986	0.844	1.18763e-52	7.05908e-38	1.2388e-56
Plekha5	5.44036e-39	0.546887	0.652	0.313	1.04314e-34	6.99785e-57	0.582912	0.672	0.356	1.34177e-52	5.44036e-39	1.39957e-56
Thbs1	1.45664e-47	0.528576	0.668	0.243	2.79297e-43	5.53625e-56	0.545908	0.614	0.259	1.06152e-51	1.45664e-47	1.10725e-55
Pdlim3	5.85189e-56	0.448305	0.705	0.212	1.12204e-51	4.65187e-37	0.270404	0.519	0.206	8.91949e-33	4.65187e-37	1.17038e-55
Timp3	1.06365e-12	0.354556	0.893	0.782	2.03945e-08	1.07636e-55	0.611619	0.903	0.692	2.06381e-51	1.06365e-12	2.15272e-55
Tm4sf1	7.55303e-39	-1.20524	0.221	0.656	1.44822e-34	8.34212e-55	-1.07104	0.197	0.62	1.59952e-50	7.55303e-39	1.66842e-54
Ogfrl1	4.22061e-21	0.418449	0.619	0.36	8.09259e-17	1.43986e-54	0.559279	0.736	0.396	2.76078e-50	4.22061e-21	2.87972e-54
Arpc1b	9.14457e-34	-0.554642	0.754	0.932	1.75338e-29	3.7283e-54	-0.580336	0.872	0.947	7.14864e-50	9.14457e-34	7.45659e-54
Nexn	4.0045e-54	0.755141	0.824	0.378	7.67823e-50	8.85327e-52	0.536241	0.778	0.419	1.69753e-47	8.85327e-52	8.00901e-54
Col3a1	6.06509e-54	0.458967	1	0.931	1.16292e-49	2.5804e-51	0.341669	1	0.965	4.94767e-47	2.5804e-51	1.21302e-53
Hoxd10	8.0419e-30	0.439381	0.652	0.35	1.54195e-25	3.10733e-52	0.473812	0.733	0.401	5.95799e-48	8.0419e-30	6.21466e-52
Wnt11	6.87364e-24	0.295964	0.381	0.131	1.31795e-19	3.17783e-52	0.346313	0.422	0.123	6.09318e-48	6.87364e-24	6.35567e-52
Basp1	8.95232e-25	0.390891	0.98	0.909	1.71652e-20	1.44956e-51	0.463922	0.994	0.94	2.77938e-47	8.95232e-25	2.89912e-51
Lsp1	2.20351e-19	0.364052	0.992	0.883	4.22501e-15	1.98047e-51	0.477721	1	0.895	3.79735e-47	2.20351e-19	3.96093e-51
Fhl2	8.56136e-44	-0.722239	0.598	0.878	1.64155e-39	2.15963e-51	-0.676366	0.558	0.804	4.14088e-47	8.56136e-44	4.31926e-51
Mecom	3.20725e-45	-0.835229	0.086	0.601	6.14957e-41	8.91445e-51	-0.714245	0.103	0.527	1.70926e-46	3.20725e-45	1.78289e-50
Bok	2.78103e-22	0.345852	0.791	0.478	5.33234e-18	1.06985e-50	0.45553	0.883	0.54	2.05132e-46	2.78103e-22	2.13969e-50
Col4a1	9.69219e-27	0.465358	0.98	0.865	1.85838e-22	1.40571e-50	0.4726	0.989	0.868	2.69531e-46	9.69219e-27	2.81143e-50
Galnt3	7.18506e-36	0.313081	0.316	0.058	1.37766e-31	1.70905e-50	0.275265	0.292	0.058	3.27694e-46	7.18506e-36	3.41811e-50
Akap12	1.77089e-46	0.627749	0.988	0.842	3.3955e-42	3.62521e-50	0.518928	0.986	0.855	6.95097e-46	1.77089e-46	7.25041e-50
Col1a2	3.90335e-50	0.36171	1	0.968	7.48428e-46	3.30637e-49	0.370891	0.997	0.981	6.33963e-45	3.30637e-49	7.8067e-50
Csrp1	4.21104e-41	0.524414	0.947	0.768	8.07425e-37	4.19002e-50	0.473523	0.944	0.795	8.03395e-46	4.21104e-41	8.38005e-50
Epb41l2	4.44215e-36	0.681378	0.848	0.628	8.51739e-32	1.07358e-49	0.6472	0.864	0.673	2.05848e-45	4.44215e-36	2.14715e-49
Cdkn1c	1.91634e-49	1.68156	0.988	0.971	3.6744e-45	7.20054e-49	1.39231	0.994	0.991	1.38063e-44	7.20054e-49	3.83269e-49
Cxcl16	5.14005e-26	0.328512	0.398	0.13	9.85554e-22	3.31025e-49	0.362354	0.436	0.133	6.34708e-45	5.14005e-26	6.6205e-49
1190002N15Rik	4.16551e-48	0.47591	0.619	0.212	7.98694e-44	6.75773e-46	0.391515	0.533	0.224	1.29573e-41	6.75773e-46	8.33101e-48
Crym	4.75756e-17	0.416205	0.184	0.042	9.12215e-13	2.95599e-47	0.458255	0.247	0.044	5.66782e-43	4.75756e-17	5.91199e-47
Cnn2	1.3005e-32	0.517081	0.971	0.911	2.49358e-28	4.78197e-47	0.458044	0.989	0.906	9.16895e-43	1.3005e-32	9.56394e-47
Flrt2	6.85623e-47	0.649014	0.734	0.34	1.31461e-42	7.82067e-41	0.482885	0.697	0.42	1.49954e-36	7.82067e-41	1.37125e-46
Snhg18	1.46247e-35	0.539392	0.918	0.8	2.80414e-31	1.0294e-46	0.507464	0.933	0.825	1.97377e-42	1.46247e-35	2.0588e-46
Cdh11	4.44113e-27	0.393279	0.992	0.832	8.51542e-23	1.26912e-46	0.434527	0.986	0.858	2.43341e-42	4.44113e-27	2.53824e-46
Shisa3	1.11607e-34	-0.632905	0.041	0.474	2.13995e-30	1.33631e-46	-0.635321	0.111	0.501	2.56224e-42	1.11607e-34	2.67262e-46
Synpo2	1.50485e-22	0.280488	0.414	0.155	2.8854e-18	2.82596e-46	0.291915	0.453	0.151	5.41849e-42	1.50485e-22	5.65192e-46
Mgll	1.23162e-19	0.341294	0.369	0.136	2.3615e-15	6.45521e-46	0.362192	0.458	0.149	1.23772e-41	1.23162e-19	1.29104e-45
Hsp90b1	5.29789e-13	0.533151	0.988	0.976	1.01582e-08	6.60153e-46	0.761605	1	0.992	1.26578e-41	5.29789e-13	1.32031e-45
Myl9	6.07378e-31	0.420151	0.975	0.861	1.16459e-26	8.78722e-46	0.427677	0.969	0.884	1.68486e-41	6.07378e-31	1.75744e-45
Gng2	1.09459e-20	0.415705	0.627	0.411	2.09876e-16	1.49494e-45	0.594884	0.694	0.439	2.8664e-41	1.09459e-20	2.98989e-45
Lef1	1.90278e-44	0.522298	0.389	0.078	3.64839e-40	3.36854e-45	0.417562	0.414	0.137	6.45885e-41	1.90278e-44	6.73709e-45
Twist1	4.60244e-30	-0.464066	0.139	0.547	8.82472e-26	5.72508e-45	-0.460764	0.158	0.554	1.09773e-40	4.60244e-30	1.14502e-44
Enc1	1.02284e-25	0.299593	0.344	0.102	1.9612e-21	1.67991e-44	0.337143	0.406	0.131	3.22107e-40	1.02284e-25	3.35983e-44
Ran	9.69933e-37	-0.645049	0.947	0.97	1.85975e-32	2.24741e-44	-0.565745	0.961	0.979	4.30918e-40	9.69933e-37	4.49482e-44
Iigp1	3.0457e-44	0.445521	0.393	0.079	5.83983e-40	4.32658e-38	0.271999	0.386	0.127	8.29578e-34	4.32658e-38	6.0914e-44
Ddit4l	5.17699e-30	0.300716	0.32	0.072	9.92637e-26	4.51306e-43	0.290235	0.339	0.091	8.65333e-39	5.17699e-30	9.02611e-43
Fam105a	4.78486e-30	0.32037	0.422	0.132	9.17449e-26	9.09746e-43	0.273698	0.431	0.148	1.74435e-38	4.78486e-30	1.81949e-42
Tpm1	2.87543e-37	0.615964	0.971	0.909	5.51335e-33	1.05547e-42	0.457331	0.994	0.928	2.02375e-38	2.87543e-37	2.11093e-42
Ptma	5.80281e-37	-0.40316	1	1	1.11263e-32	1.96593e-42	-0.377853	1	1	3.76948e-38	5.80281e-37	3.93187e-42
Mef2c	1.95359e-34	-0.89679	0.123	0.574	3.74582e-30	3.0645e-42	-0.802331	0.153	0.533	5.87587e-38	1.95359e-34	6.12899e-42
Hspa8	2.27007e-27	-0.362603	0.996	0.998	4.35263e-23	3.7343e-42	-0.367864	0.994	0.998	7.16014e-38	2.27007e-27	7.46859e-42
Zfp503	6.59597e-16	0.36158	0.791	0.621	1.26471e-11	1.46857e-41	0.410498	0.881	0.693	2.81583e-37	6.59597e-16	2.93714e-41
Atrnl1	8.08924e-22	0.384941	0.529	0.28	1.55103e-17	3.1954e-41	0.358164	0.578	0.285	6.12687e-37	8.08924e-22	6.39081e-41
Malat1	1.13977e-40	0.436588	1	1	2.1854e-36	1.46952e-29	0.327589	1	1	2.81765e-25	1.46952e-29	2.27955e-40
6330403K07Rik	1.81106e-32	0.454595	0.775	0.489	3.47253e-28	5.69616e-40	0.37284	0.839	0.592	1.09218e-35	1.81106e-32	1.13923e-39
Selenoh	2.69105e-21	-0.541602	0.697	0.836	5.15981e-17	9.18431e-40	-0.542491	0.811	0.89	1.761e-35	2.69105e-21	1.83686e-39
Prickle1	1.05466e-19	0.258412	0.414	0.171	2.0222e-15	2.8866e-39	0.333662	0.503	0.212	5.53477e-35	1.05466e-19	5.77321e-39
Aldh1a2	8.08695e-30	-0.775072	0.184	0.557	1.55059e-25	4.92664e-39	-0.769057	0.239	0.574	9.44634e-35	8.08695e-30	9.85328e-39
Ano1	8.10491e-28	0.31647	0.496	0.185	1.55404e-23	1.54099e-38	0.299261	0.472	0.188	2.95469e-34	8.10491e-28	3.08198e-38
Pltp	6.62468e-27	0.350443	0.52	0.212	1.27022e-22	3.98599e-38	0.280875	0.558	0.247	7.64274e-34	6.62468e-27	7.97198e-38
Hmgb2	8.78462e-22	-1.21077	0.832	0.889	1.68436e-17	1.24824e-37	-1.25189	0.853	0.897	2.39337e-33	8.78462e-22	2.49647e-37
Rassf9	8.09214e-34	0.639806	0.508	0.194	1.55159e-29	1.3789e-37	0.602272	0.433	0.178	2.6439e-33	8.09214e-34	2.7578e-37
Nid2	1.10479e-20	0.343524	0.545	0.286	2.11833e-16	1.92851e-37	0.347566	0.681	0.377	3.69772e-33	1.10479e-20	3.85701e-37
Pla2g4a	1.65169e-33	0.477034	0.807	0.505	3.16694e-29	2.08955e-37	0.429988	0.728	0.46	4.00651e-33	1.65169e-33	4.17911e-37
Fos	4.08154e-06	-0.278877	0.705	0.818	0.0782594	3.58881e-37	-0.753932	0.506	0.775	6.88119e-33	4.08154e-06	7.17763e-37
Sdk2	8.36805e-21	0.293266	0.406	0.165	1.60449e-16	5.69401e-37	0.272643	0.475	0.199	1.09177e-32	8.36805e-21	1.1388e-36
Nr2f2	1.64956e-14	0.256152	0.971	0.926	3.16286e-10	9.03677e-37	0.362192	0.997	0.923	1.73271e-32	1.64956e-14	1.80735e-36
Hmgb1	1.02537e-36	-0.549495	0.996	0.998	1.96605e-32	3.27836e-36	-0.433548	0.997	0.998	6.28592e-32	3.27836e-36	2.05074e-36
Spc24	6.73681e-24	-0.657549	0.111	0.439	1.29172e-19	1.57992e-36	-0.646685	0.183	0.507	3.02934e-32	6.73681e-24	3.15984e-36
Smc2	1.62734e-16	-0.637908	0.275	0.505	3.12026e-12	2.52464e-36	-0.715802	0.261	0.567	4.84074e-32	1.62734e-16	5.04927e-36
Hmcn1	1.29012e-25	0.48061	0.893	0.644	2.47367e-21	2.55753e-35	0.527352	0.864	0.636	4.90381e-31	1.29012e-25	5.11507e-35
Ly6h	6.61958e-23	0.424078	0.516	0.234	1.26924e-18	4.09547e-35	0.28851	0.603	0.285	7.85265e-31	6.61958e-23	8.19093e-35
Bgn	2.82777e-23	0.3072	0.98	0.871	5.42196e-19	8.607e-35	0.317246	0.992	0.913	1.65031e-30	2.82777e-23	1.7214e-34
Rnaseh2c	7.37497e-16	-0.359172	0.586	0.764	1.41408e-11	1.44998e-34	-0.417075	0.586	0.797	2.7802e-30	7.37497e-16	2.89997e-34
Cks1b	2.72741e-17	-0.550186	0.578	0.722	5.22954e-13	2.02549e-34	-0.544084	0.642	0.806	3.88368e-30	2.72741e-17	4.05099e-34
Nradd	2.66176e-13	0.281771	0.5	0.329	5.10366e-09	3.09943e-34	0.323281	0.658	0.39	5.94285e-30	2.66176e-13	6.19887e-34
Fibin	1.23677e-27	-0.639244	0.041	0.407	2.37138e-23	5.80493e-34	-0.553729	0.1	0.43	1.11304e-29	1.23677e-27	1.16099e-33
Ifitm3	8.04358e-23	-0.417027	0.914	0.971	1.54228e-18	6.70391e-34	-0.425888	0.897	0.957	1.28541e-29	8.04358e-23	1.34078e-33
Pbx1	1.51262e-21	0.330511	0.996	0.929	2.9003e-17	2.70724e-33	0.350311	0.994	0.94	5.19086e-29	1.51262e-21	5.41448e-33
Tbx2	3.95331e-14	0.302261	0.689	0.496	7.58008e-10	2.84465e-33	0.397706	0.728	0.454	5.45434e-29	3.95331e-14	5.6893e-33
Nectin3	3.29083e-14	0.262223	0.574	0.368	6.30984e-10	3.96727e-33	0.328782	0.675	0.431	7.60684e-29	3.29083e-14	7.93454e-33
Rgs5	2.84187e-32	-0.806174	0.234	0.66	5.44899e-28	3.67595e-21	-0.607688	0.219	0.467	7.04826e-17	3.67595e-21	5.68373e-32
Tuba1b	2.32623e-26	-0.641115	0.873	0.928	4.4603e-22	2.86901e-32	-0.513152	0.947	0.954	5.50104e-28	2.32623e-26	5.73802e-32
Dek	4.16885e-19	-0.536903	0.82	0.891	7.99335e-15	3.21282e-32	-0.525079	0.831	0.917	6.16027e-28	4.16885e-19	6.42565e-32
Epha3	1.13731e-27	0.318681	0.508	0.185	2.18069e-23	5.31725e-32	0.298033	0.558	0.262	1.01953e-27	1.13731e-27	1.06345e-31
Stmn1	1.02248e-28	-0.859272	0.848	0.901	1.9605e-24	5.86444e-32	-0.60139	0.969	0.96	1.12445e-27	1.02248e-28	1.17289e-31
Pcsk5	3.42852e-28	0.343458	0.447	0.158	6.57385e-24	7.66716e-32	0.307614	0.464	0.213	1.4701e-27	3.42852e-28	1.53343e-31
Ldb2	3.33139e-11	0.270502	0.738	0.56	6.38761e-07	1.69077e-31	0.386192	0.853	0.596	3.24189e-27	3.33139e-11	3.38154e-31
Pclaf	1.18866e-25	-1.04123	0.18	0.512	2.27914e-21	2.4048e-31	-0.934443	0.308	0.567	4.61096e-27	1.18866e-25	4.8096e-31
Eif5a	2.97917e-28	-0.39035	0.975	0.982	5.71226e-24	2.47686e-31	-0.346417	0.989	0.988	4.74912e-27	2.97917e-28	4.95371e-31
Flna	4.25545e-19	0.307089	0.963	0.896	8.15939e-15	5.57309e-31	0.311345	0.986	0.914	1.06858e-26	4.25545e-19	1.11462e-30
Ltbp1	6.55276e-31	0.388339	0.48	0.165	1.25643e-26	5.76354e-31	0.259763	0.511	0.227	1.1051e-26	6.55276e-31	1.15271e-30
Mest	1.07327e-21	-0.70155	0.857	0.862	2.05788e-17	1.19027e-30	-0.565551	0.925	0.934	2.28223e-26	1.07327e-21	2.38054e-30
Gnas	1.21212e-30	-0.442226	1	0.998	2.32412e-26	6.07302e-25	-0.318689	1	1	1.16444e-20	6.07302e-25	2.42424e-30
Lmnb1	1.36646e-21	-0.643712	0.504	0.709	2.62004e-17	2.08351e-30	-0.579249	0.625	0.778	3.99492e-26	1.36646e-21	4.16702e-30
Adamts5	1.62686e-23	-0.468341	0.041	0.367	3.11934e-19	2.0897e-30	-0.37257	0.067	0.374	4.0068e-26	1.62686e-23	4.17941e-30
Nrep	6.00195e-19	0.330359	0.857	0.73	1.15081e-14	2.21296e-30	0.336065	0.892	0.782	4.24312e-26	6.00195e-19	4.42591e-30
Tmpo	1.40696e-19	-0.49217	0.508	0.722	2.69771e-15	2.31221e-30	-0.452095	0.589	0.763	4.43343e-26	1.40696e-19	4.62442e-30
Ier2	3.06582e-19	-0.523699	0.578	0.805	5.8784e-15	4.59768e-30	-0.558355	0.519	0.779	8.81559e-26	3.06582e-19	9.19536e-30
Birc5	8.5206e-21	-0.817988	0.139	0.436	1.63374e-16	5.42006e-30	-0.824963	0.219	0.497	1.03924e-25	8.5206e-21	1.08401e-29
Smoc2	9.14964e-30	0.627803	0.402	0.119	1.75435e-25	1.98657e-19	0.537799	0.419	0.224	3.80905e-15	1.98657e-19	1.82993e-29
H2afx	4.82775e-18	-0.92276	0.434	0.628	9.25672e-14	1.11403e-29	-0.854497	0.506	0.699	2.13604e-25	4.82775e-18	2.22806e-29
Podxl2	1.0252e-17	0.32053	0.717	0.497	1.96571e-13	1.3004e-29	0.321999	0.764	0.554	2.49339e-25	1.0252e-17	2.6008e-29
Cux1	2.9041e-23	0.367177	0.807	0.611	5.56833e-19	3.1703e-29	0.322554	0.808	0.643	6.07873e-25	2.9041e-23	6.3406e-29
Cdca8	8.06514e-22	-0.649701	0.07	0.38	1.54641e-17	4.15962e-29	-0.637277	0.128	0.416	7.97566e-25	8.06514e-22	8.31924e-29
Foxd1	1.9949e-24	-0.674551	0.094	0.435	3.82502e-20	5.41353e-29	-0.695075	0.167	0.46	1.03799e-24	1.9949e-24	1.08271e-28
Cenpm	4.57257e-22	-0.380856	0.074	0.401	8.76744e-18	9.5149e-29	-0.350518	0.128	0.434	1.82439e-24	4.57257e-22	1.90298e-28
Rarb	4.20174e-17	0.274585	0.607	0.372	8.05642e-13	1.03091e-28	0.280034	0.617	0.361	1.97667e-24	4.20174e-17	2.06182e-28
Frem1	2.38115e-18	0.307162	0.693	0.438	4.56562e-14	2.6728e-28	0.316855	0.706	0.431	5.12483e-24	2.38115e-18	5.34561e-28
Spc25	4.29067e-18	-0.539282	0.131	0.408	8.22693e-14	3.18483e-28	-0.559829	0.139	0.426	6.10658e-24	4.29067e-18	6.36965e-28
Tnfaip8	1.87091e-26	0.411228	0.738	0.462	3.58728e-22	4.88604e-28	0.306867	0.753	0.54	9.3685e-24	1.87091e-26	9.77209e-28
Hmgn2	1.19943e-13	-0.37411	0.91	0.929	2.29979e-09	5.13179e-28	-0.379326	0.944	0.963	9.83969e-24	1.19943e-13	1.02636e-27
Tbx3	7.48935e-28	0.488253	0.553	0.256	1.43601e-23	8.02552e-14	0.340617	0.453	0.312	1.53881e-09	8.02552e-14	1.49787e-27
Hoxa11	9.96064e-20	0.319614	0.553	0.303	1.90985e-15	1.08777e-27	0.313634	0.539	0.304	2.0857e-23	9.96064e-20	2.17555e-27
Nme1	1.25862e-27	-0.51534	0.746	0.885	2.41327e-23	2.61967e-19	-0.327457	0.908	0.92	5.02296e-15	2.61967e-19	2.51723e-27
Bmp4	2.53193e-09	0.271014	0.529	0.363	4.85472e-05	2.12001e-27	0.327993	0.639	0.387	4.0649e-23	2.53193e-09	4.24001e-27
Loxl1	8.79099e-17	-0.319202	0.156	0.446	1.68558e-12	2.43559e-27	-0.370396	0.214	0.506	4.67001e-23	8.79099e-17	4.87119e-27
Adgrl2	9.04356e-18	-0.331632	0.152	0.461	1.73401e-13	2.6703e-27	-0.357208	0.203	0.496	5.12004e-23	9.04356e-18	5.34061e-27
Rrm1	3.02969e-10	-0.288809	0.221	0.417	5.80913e-06	3.96621e-27	-0.370798	0.236	0.515	7.60481e-23	3.02969e-10	7.93242e-27
Neto2	3.08956e-18	0.465109	0.488	0.248	5.92393e-14	4.67777e-27	0.411413	0.497	0.262	8.96915e-23	3.08956e-18	9.35553e-27
Sparcl1	1.54324e-06	-0.397882	0.463	0.621	0.02959	4.95668e-27	-0.592737	0.483	0.732	9.50393e-23	1.54324e-06	9.91335e-27
Igfbp4	5.31737e-27	0.394981	0.967	0.893	1.01955e-22	4.4234e-26	0.26798	0.986	0.943	8.48143e-22	4.4234e-26	1.06347e-26
Tshz3	2.41784e-19	0.262405	0.455	0.2	4.63596e-15	6.83259e-27	0.259725	0.494	0.245	1.31008e-22	2.41784e-19	1.36652e-26
Iqgap2	2.95203e-19	-0.29847	0.061	0.359	5.66022e-15	8.498e-27	-0.281751	0.108	0.402	1.62941e-22	2.95203e-19	1.6996e-26
Ybx1	5.24917e-26	-0.33555	0.996	0.992	1.00648e-21	9.16047e-27	-0.267036	0.997	0.997	1.75643e-22	5.24917e-26	1.83209e-26
Mmp23	1.12334e-22	0.369713	0.57	0.293	2.1539e-18	1.41897e-26	0.25635	0.642	0.368	2.72074e-22	1.12334e-22	2.83795e-26
Tacc3	3.33541e-14	-0.382655	0.09	0.321	6.39532e-10	1.89542e-26	-0.41522	0.092	0.367	3.63428e-22	3.33541e-14	3.79084e-26
Ccna2	1.061e-18	-0.518023	0.057	0.328	2.03436e-14	2.03383e-26	-0.502856	0.106	0.377	3.89966e-22	1.061e-18	4.06766e-26
Cenpf	1.07001e-15	-0.892354	0.102	0.347	2.05165e-11	2.13026e-26	-0.876239	0.119	0.399	4.08457e-22	1.07001e-15	4.26053e-26
Pitrm1	2.59404e-14	0.278296	0.541	0.342	4.97382e-10	8.56729e-26	0.298056	0.603	0.393	1.64269e-21	2.59404e-14	1.71346e-25
Pcolce	1.91038e-25	0.360973	0.914	0.69	3.66297e-21	9.10098e-26	0.263504	0.917	0.761	1.74502e-21	1.91038e-25	1.8202e-25
Prdx5	1.58007e-13	0.259308	0.939	0.916	3.02963e-09	9.57805e-26	0.258536	0.95	0.944	1.8365e-21	1.58007e-13	1.91561e-25
Tubb4b	2.78298e-15	-0.814217	0.602	0.756	5.33609e-11	1.94505e-25	-0.75897	0.753	0.844	3.72944e-21	2.78298e-15	3.8901e-25
Cdca3	9.34722e-19	-0.361649	0.049	0.328	1.79224e-14	2.06708e-25	-0.387669	0.103	0.373	3.96342e-21	9.34722e-19	4.13416e-25
Ntm	3.01564e-25	0.430626	0.557	0.264	5.78219e-21	1.35183e-24	0.364507	0.542	0.322	2.592e-20	1.35183e-24	6.03128e-25
Prdx1	6.167e-25	-0.352142	0.951	0.979	1.18246e-20	3.01743e-25	-0.279462	0.969	0.988	5.78562e-21	6.167e-25	6.03486e-25
Cenpw	5.92849e-13	-0.280365	0.156	0.393	1.13673e-08	3.57294e-25	-0.329159	0.167	0.448	6.85075e-21	5.92849e-13	7.14588e-25
Ube2s	2.85437e-15	-0.569126	0.848	0.905	5.47298e-11	6.73558e-25	-0.542322	0.889	0.933	1.29148e-20	2.85437e-15	1.34712e-24
Spry1	1.55169e-12	-0.304181	0.389	0.648	2.97521e-08	8.08178e-25	-0.358041	0.369	0.64	1.5496e-20	1.55169e-12	1.61636e-24
Tk1	1.07369e-11	-0.286023	0.061	0.255	2.05869e-07	8.12994e-25	-0.358518	0.064	0.322	1.55883e-20	1.07369e-11	1.62599e-24
Ncald	1.04826e-14	0.312187	0.459	0.247	2.00993e-10	9.45712e-25	0.3354	0.511	0.28	1.81331e-20	1.04826e-14	1.89142e-24
Knl1	2.43201e-14	-0.329435	0.037	0.256	4.66314e-10	1.45567e-24	-0.331468	0.042	0.294	2.7911e-20	2.43201e-14	2.91134e-24
Dbf4	9.96834e-12	-0.263822	0.07	0.268	1.91133e-07	1.72435e-24	-0.310944	0.078	0.338	3.30627e-20	9.96834e-12	3.4487e-24
Cks2	9.30341e-19	-0.816048	0.221	0.488	1.78384e-14	2.29902e-24	-0.762211	0.322	0.556	4.40814e-20	9.30341e-19	4.59804e-24
Hnrnpa2b1	1.21025e-12	-0.250137	0.963	0.985	2.32053e-08	2.67882e-24	-0.273096	0.981	0.987	5.13637e-20	1.21025e-12	5.35764e-24
Sema5a	3.40689e-21	0.477426	0.643	0.411	6.53237e-17	2.68923e-24	0.468277	0.65	0.456	5.15634e-20	3.40689e-21	5.37847e-24
Calm2	2.5314e-17	-0.32782	0.967	0.986	4.85371e-13	3.3043e-24	-0.299076	0.986	0.988	6.33566e-20	2.5314e-17	6.6086e-24
Knstrn	2.31474e-18	-0.397124	0.082	0.363	4.43828e-14	4.41926e-24	-0.38203	0.131	0.392	8.47348e-20	2.31474e-18	8.83851e-24
Tpx2	2.57526e-14	-0.534051	0.107	0.335	4.9378e-10	4.77038e-24	-0.560775	0.106	0.36	9.14673e-20	2.57526e-14	9.54076e-24
Sema3a	4.85869e-15	0.373167	0.59	0.379	9.31604e-11	5.27302e-24	0.356607	0.647	0.421	1.01105e-19	4.85869e-15	1.0546e-23
Foxc2	1.60556e-19	0.346481	0.68	0.458	3.07849e-15	5.7362e-24	0.294942	0.703	0.498	1.09986e-19	1.60556e-19	1.14724e-23
Kif11	1.35049e-13	-0.306278	0.037	0.247	2.58944e-09	7.15371e-24	-0.313762	0.019	0.257	1.37165e-19	1.35049e-13	1.43074e-23
Ptk7	4.8161e-15	0.278181	0.639	0.438	9.2344e-11	7.695e-24	0.282267	0.728	0.531	1.47544e-19	4.8161e-15	1.539e-23
Smc4	3.47119e-13	-0.631064	0.467	0.622	6.65565e-09	1.21688e-23	-0.60636	0.481	0.664	2.33324e-19	3.47119e-13	2.43376e-23
Dgkh	2.99212e-12	0.280918	0.443	0.267	5.73708e-08	2.10361e-23	0.281879	0.444	0.234	4.03346e-19	2.99212e-12	4.20721e-23
Slc25a5	2.12469e-23	-0.517207	0.713	0.868	4.07388e-19	2.58136e-20	-0.412047	0.822	0.864	4.94951e-16	2.58136e-20	4.24938e-23
Cenpa	1.52632e-19	-0.832149	0.139	0.429	2.92656e-15	2.1385e-23	-0.728658	0.222	0.469	4.10037e-19	1.52632e-19	4.27701e-23
Pdgfra	2.57053e-15	0.370879	0.824	0.656	4.92874e-11	2.74343e-23	0.326048	0.906	0.764	5.26026e-19	2.57053e-15	5.48687e-23
Ckap2	2.09043e-12	-0.276447	0.053	0.261	4.00818e-08	2.95956e-23	-0.307846	0.058	0.307	5.67465e-19	2.09043e-12	5.91911e-23
Ccnb2	1.67056e-19	-0.630587	0.107	0.407	3.20314e-15	3.06857e-23	-0.525385	0.194	0.453	5.88368e-19	1.67056e-19	6.13715e-23
Cdk1	3.61373e-16	-0.654401	0.25	0.491	6.92897e-12	3.97879e-23	-0.69988	0.353	0.555	7.62894e-19	3.61373e-16	7.95759e-23
Gdnf	1.65276e-15	-0.257113	0.025	0.259	3.16901e-11	4.39979e-23	-0.255157	0.036	0.279	8.43617e-19	1.65276e-15	8.79959e-23
Hspd1	1.69047e-12	-0.314251	0.881	0.912	3.24131e-08	4.46674e-23	-0.338954	0.911	0.947	8.56453e-19	1.69047e-12	8.93348e-23
Aurkb	1.30966e-14	-0.394924	0.045	0.267	2.51114e-10	6.40104e-23	-0.399874	0.064	0.307	1.22734e-18	1.30966e-14	1.28021e-22
Klf2	2.29134e-18	-0.574276	0.172	0.46	4.39342e-14	8.04051e-23	-0.516639	0.194	0.457	1.54169e-18	2.29134e-18	1.6081e-22
Lockd	5.90131e-13	-0.305559	0.061	0.278	1.13152e-08	1.10992e-22	-0.324955	0.097	0.355	2.12817e-18	5.90131e-13	2.21984e-22
Pbk	2.32783e-10	-0.262322	0.07	0.251	4.46337e-06	1.15843e-22	-0.314433	0.056	0.296	2.22117e-18	2.32783e-10	2.31686e-22
Reln	1.98352e-19	-0.33604	0.012	0.283	3.8032e-15	1.32523e-22	-0.288089	0.033	0.27	2.54099e-18	1.98352e-19	2.65046e-22
Anp32b	4.78048e-20	-0.355501	0.975	0.983	9.16608e-16	1.631e-22	-0.303636	0.972	0.982	3.12727e-18	4.78048e-20	3.26199e-22
Mcm5	3.56545e-21	-0.403929	0.102	0.418	6.83639e-17	1.98676e-22	-0.370142	0.225	0.485	3.80942e-18	3.56545e-21	3.97352e-22
Svil	2.63344e-17	0.321387	0.766	0.561	5.04936e-13	2.10074e-22	0.296645	0.781	0.608	4.02796e-18	2.63344e-17	4.20148e-22
Lsm6	7.75685e-12	-0.296332	0.602	0.726	1.4873e-07	2.73815e-22	-0.315897	0.686	0.797	5.25013e-18	7.75685e-12	5.4763e-22
Kif22	3.10401e-13	-0.3346	0.066	0.278	5.95163e-09	3.42284e-22	-0.358625	0.081	0.321	6.56296e-18	3.10401e-13	6.84569e-22
Mki67	3.56262e-19	-0.805631	0.115	0.393	6.83096e-15	4.33436e-22	-0.701588	0.206	0.439	8.31069e-18	3.56262e-19	8.66871e-22
Tyms	2.15447e-11	-0.45874	0.279	0.476	4.13097e-07	4.84212e-22	-0.580213	0.383	0.572	9.28428e-18	2.15447e-11	9.68424e-22
Mfge8	5.48203e-22	-0.594628	0.582	0.812	1.05112e-17	3.01966e-18	-0.467662	0.708	0.837	5.7899e-14	3.01966e-18	1.09641e-21
Rasl11a	9.67052e-22	-0.545604	0.311	0.633	1.85423e-17	6.37254e-16	-0.398014	0.392	0.581	1.22187e-11	6.37254e-16	1.9341e-21
Snrpf	1.1256e-21	-0.375726	0.807	0.918	2.15823e-17	2.09195e-19	-0.259231	0.922	0.941	4.01111e-15	2.09195e-19	2.2512e-21
Peg3	1.16916e-21	-0.550947	0.648	0.844	2.24174e-17	1.33967e-17	-0.395336	0.8	0.887	2.56869e-13	1.33967e-17	2.33832e-21
Ccdc80	1.87958e-15	0.391653	0.873	0.796	3.60391e-11	1.3038e-21	0.349004	0.906	0.801	2.49992e-17	1.87958e-15	2.60761e-21
Cox5a	1.52471e-21	-0.350468	0.914	0.947	2.92347e-17	1.44843e-21	-0.28087	0.917	0.953	2.77721e-17	1.52471e-21	2.89685e-21
Ranbp1	1.58694e-21	-0.46894	0.82	0.889	3.0428e-17	1.79356e-20	-0.350018	0.892	0.918	3.43897e-16	1.79356e-20	3.17388e-21
Ckap2l	1.7895e-11	-0.308522	0.07	0.263	3.43119e-07	1.79842e-21	-0.35633	0.072	0.309	3.44829e-17	1.7895e-11	3.59684e-21
Racgap1	9.60202e-16	-0.389575	0.078	0.321	1.84109e-11	1.82995e-21	-0.383579	0.128	0.367	3.50874e-17	9.60202e-16	3.6599e-21
Top2a	1.66847e-19	-1.11095	0.164	0.437	3.19913e-15	2.01652e-21	-0.966361	0.267	0.48	3.86648e-17	1.66847e-19	4.03305e-21
Srsf2	4.18407e-13	-0.294961	0.848	0.886	8.02253e-09	2.06035e-21	-0.298252	0.917	0.935	3.95052e-17	4.18407e-13	4.12071e-21
Fbxo5	8.11234e-13	-0.358145	0.074	0.283	1.55546e-08	2.11128e-21	-0.361157	0.089	0.322	4.04818e-17	8.11234e-13	4.22257e-21
Nasp	6.21104e-15	-0.439681	0.607	0.739	1.19091e-10	2.30793e-21	-0.411399	0.692	0.809	4.42523e-17	6.21104e-15	4.61586e-21
Gnaq	2.18571e-10	0.266603	0.648	0.513	4.19089e-06	2.69614e-21	0.304287	0.717	0.557	5.16958e-17	2.18571e-10	5.39228e-21
Ldhb	2.76568e-21	-0.425337	0.684	0.847	5.30292e-17	3.3571e-18	-0.310802	0.664	0.811	6.43691e-14	3.3571e-18	5.53136e-21
Phgdh	1.12828e-12	-0.330701	0.225	0.46	2.16336e-08	2.86106e-21	-0.374393	0.278	0.532	5.48579e-17	1.12828e-12	5.72212e-21
Clmp	2.65542e-14	0.285441	0.721	0.506	5.0915e-10	3.2766e-21	0.250546	0.817	0.615	6.28255e-17	2.65542e-14	6.5532e-21
Kif23	1.7289e-13	-0.32889	0.037	0.245	3.31499e-09	3.36682e-21	-0.366043	0.058	0.286	6.45554e-17	1.7289e-13	6.73364e-21
Lsm4	1.87642e-11	-0.25998	0.791	0.887	3.59784e-07	4.11231e-21	-0.305163	0.806	0.875	7.88495e-17	1.87642e-11	8.22463e-21
Col16a1	1.7656e-15	0.254522	0.619	0.407	3.38537e-11	4.85469e-21	0.265526	0.667	0.463	9.30837e-17	1.7656e-15	9.70937e-21
Vcan	6.3232e-21	0.579773	0.664	0.434	1.21241e-16	1.33213e-10	0.309248	0.625	0.541	2.55423e-06	1.33213e-10	1.26464e-20
Ccnb1	4.18443e-15	-0.519687	0.041	0.274	8.02322e-11	8.1963e-21	-0.526627	0.1	0.331	1.57156e-16	4.18443e-15	1.63926e-20
Tsc22d2	8.7927e-21	0.439545	0.578	0.348	1.68591e-16	6.39913e-12	0.27205	0.528	0.407	1.22697e-07	6.39913e-12	1.75854e-20
Hirip3	3.88211e-11	-0.309779	0.246	0.457	7.44355e-07	9.941e-21	-0.323317	0.258	0.499	1.90609e-16	3.88211e-11	1.9882e-20
Tubb2b	2.8225e-12	0.282936	0.426	0.238	5.41187e-08	1.88087e-20	0.292671	0.581	0.357	3.60639e-16	2.8225e-12	3.76175e-20
Igf1	1.06235e-08	-0.336368	0.016	0.151	0.000203695	2.57434e-20	-0.631771	0.067	0.293	4.93604e-16	1.06235e-08	5.14868e-20
Mcm7	5.40841e-17	-0.410733	0.266	0.543	1.03701e-12	2.82982e-20	-0.390672	0.403	0.606	5.4259e-16	5.40841e-17	5.65965e-20
Sgo2a	1.05334e-13	-0.288255	0.025	0.233	2.01968e-09	2.84231e-20	-0.287211	0.05	0.273	5.44984e-16	1.05334e-13	5.68461e-20
Ndufa4l2	1.87334e-15	-0.787083	0.463	0.671	3.59194e-11	2.93478e-20	-0.738687	0.325	0.553	5.62715e-16	1.87334e-15	5.86956e-20
Tpst1	4.66951e-17	0.283702	0.598	0.378	8.95332e-13	3.32315e-20	0.288063	0.611	0.431	6.37181e-16	4.66951e-17	6.6463e-20
S100a10	3.6139e-13	0.271985	0.967	0.888	6.92929e-09	5.74854e-20	0.258766	0.981	0.923	1.10223e-15	3.6139e-13	1.14971e-19
Kif20b	5.16056e-11	-0.288055	0.066	0.255	9.89486e-07	5.77326e-20	-0.313206	0.072	0.297	1.10697e-15	5.16056e-11	1.15465e-19
Snrpd1	4.12578e-17	-0.354413	0.881	0.922	7.91077e-13	6.31766e-20	-0.272739	0.936	0.942	1.21135e-15	4.12578e-17	1.26353e-19
Nucks1	3.23128e-17	-0.461045	0.803	0.885	6.19566e-13	7.09024e-20	-0.38174	0.864	0.911	1.35948e-15	3.23128e-17	1.41805e-19
Kif15	5.06701e-15	-0.307169	0.041	0.273	9.71549e-11	1.14365e-19	-0.260857	0.069	0.297	2.19283e-15	5.06701e-15	2.28729e-19
Nt5dc2	4.93418e-17	-0.353943	0.635	0.802	9.46081e-13	1.29701e-19	-0.27823	0.772	0.87	2.48689e-15	4.93418e-17	2.59403e-19
Hmmr	2.34032e-15	-0.466357	0.029	0.256	4.48734e-11	1.42367e-19	-0.446932	0.078	0.294	2.72974e-15	2.34032e-15	2.84734e-19
Lsm2	2.86995e-12	-0.328166	0.475	0.659	5.50284e-08	1.46911e-19	-0.315869	0.578	0.735	2.81688e-15	2.86995e-12	2.93823e-19
Pimreg	3.44838e-13	-0.275641	0.029	0.234	6.61193e-09	2.0761e-19	-0.311516	0.056	0.272	3.98072e-15	3.44838e-13	4.15221e-19
Nsmce4a	4.28552e-12	-0.268179	0.557	0.732	8.21706e-08	2.8719e-19	-0.262627	0.614	0.773	5.50659e-15	4.28552e-12	5.7438e-19
Hist1h1b	3.59836e-13	-1.17952	0.189	0.398	6.89949e-09	3.11682e-19	-1.13001	0.217	0.431	5.97619e-15	3.59836e-13	6.23364e-19
Dlk1	9.46463e-14	-0.991951	0.143	0.381	1.81475e-09	3.23394e-19	-1.60054	0.292	0.521	6.20075e-15	9.46463e-14	6.46787e-19
Nostrin	3.24389e-19	-0.509708	0.041	0.323	6.21984e-15	1.14106e-18	-0.319561	0.067	0.281	2.18787e-14	1.14106e-18	6.48779e-19
Rrm2	2.70378e-12	-0.325834	0.082	0.293	5.18423e-08	3.2529e-19	-0.354422	0.119	0.344	6.23711e-15	2.70378e-12	6.5058e-19
Dkk2	2.7255e-14	-0.803325	0.049	0.271	5.22587e-10	3.77122e-19	-0.669856	0.067	0.282	7.23094e-15	2.7255e-14	7.54244e-19
Hjurp	6.76231e-12	-0.392777	0.262	0.47	1.29661e-07	3.88278e-19	-0.358544	0.328	0.536	7.44484e-15	6.76231e-12	7.76556e-19
Incenp	2.51534e-11	-0.346121	0.102	0.297	4.82291e-07	4.0339e-19	-0.370908	0.119	0.338	7.7346e-15	2.51534e-11	8.0678e-19
Dut	3.1939e-18	-0.454058	0.426	0.656	6.12399e-14	4.58876e-19	-0.362935	0.55	0.698	8.79849e-15	3.1939e-18	9.17752e-19
Srsf3	2.77185e-12	-0.276499	0.967	0.966	5.31475e-08	4.8562e-19	-0.276903	0.983	0.983	9.31128e-15	2.77185e-12	9.7124e-19
Dkk1	2.01505e-18	-0.709626	0.037	0.305	3.86366e-14	6.76285e-19	-0.610868	0.053	0.263	1.29671e-14	2.01505e-18	1.35257e-18
Myh11	7.02038e-19	-0.467539	0.357	0.115	1.34609e-14	2.89899e-13	-0.537999	0.319	0.152	5.55853e-09	2.89899e-13	1.40408e-18
Kcnj8	7.32328e-12	-0.455433	0.422	0.64	1.40417e-07	7.32978e-19	-0.438984	0.236	0.478	1.40541e-14	7.32328e-12	1.46596e-18
Prc1	3.1976e-14	-0.599695	0.066	0.29	6.13108e-10	9.05313e-19	-0.559099	0.108	0.323	1.73585e-14	3.1976e-14	1.81063e-18
Anp32e	1.53058e-12	-0.345802	0.508	0.687	2.93473e-08	1.39037e-18	-0.327388	0.606	0.736	2.6659e-14	1.53058e-12	2.78075e-18
Ccnd1	6.63595e-08	0.398358	0.635	0.545	0.00127238	1.49124e-18	0.469169	0.692	0.571	2.8593e-14	6.63595e-08	2.98248e-18
Srsf7	3.40183e-15	-0.34611	0.705	0.827	6.52266e-11	1.59006e-18	-0.295501	0.817	0.867	3.04879e-14	3.40183e-15	3.18013e-18
Pkm	4.14821e-16	-0.31653	0.971	0.982	7.95378e-12	1.64681e-18	-0.31082	0.947	0.969	3.15759e-14	4.14821e-16	3.29361e-18
App	1.8839e-18	-0.425044	0.717	0.905	3.61218e-14	2.26404e-18	-0.354055	0.814	0.903	4.34106e-14	2.26404e-18	3.76779e-18
Cenpe	9.83272e-12	-0.502967	0.123	0.322	1.88533e-07	1.92012e-18	-0.492348	0.144	0.368	3.68164e-14	9.83272e-12	3.84024e-18
Fzd1	2.6557e-11	0.267995	0.73	0.57	5.09203e-07	1.98756e-18	0.298672	0.736	0.558	3.81094e-14	2.6557e-11	3.97512e-18
Lbhd2	1.16939e-13	-0.250801	0.025	0.232	2.24218e-09	3.25313e-18	-0.252204	0.05	0.255	6.23756e-14	1.16939e-13	6.50627e-18
Sgo1	2.69651e-14	-0.275032	0.037	0.257	5.17028e-10	3.88896e-18	-0.261754	0.078	0.286	7.4567e-14	2.69651e-14	7.77792e-18
Gmnn	1.4507e-16	-0.35079	0.119	0.384	2.78156e-12	5.76492e-18	-0.313169	0.233	0.454	1.10537e-13	1.4507e-16	1.15298e-17
Hes1	3.48495e-10	-0.344672	0.316	0.529	6.68204e-06	9.95947e-18	-0.322325	0.275	0.52	1.90963e-13	3.48495e-10	1.99189e-17
Nusap1	1.32427e-10	-0.63034	0.123	0.307	2.53915e-06	1.03897e-17	-0.597347	0.131	0.333	1.99213e-13	1.32427e-10	2.07795e-17
Cdc20	1.17919e-12	-0.574197	0.078	0.283	2.26099e-08	1.36945e-17	-0.602822	0.136	0.345	2.62579e-13	1.17919e-12	2.7389e-17
Dctpp1	1.46719e-17	-0.409832	0.357	0.621	2.8132e-13	5.12784e-15	-0.289348	0.514	0.667	9.83213e-11	5.12784e-15	2.93439e-17
Nrp1	2.25146e-12	-0.456415	0.525	0.738	4.31695e-08	4.83392e-17	-0.381784	0.572	0.74	9.26856e-13	2.25146e-12	9.66785e-17
Pla2g7	1.12108e-12	0.309296	0.508	0.313	2.14955e-08	6.68166e-17	0.294913	0.489	0.315	1.28114e-12	1.12108e-12	1.33633e-16
Hist1h2ap	6.5651e-10	-1.55305	0.287	0.449	1.25879e-05	1.02197e-16	-1.65536	0.5	0.653	1.95953e-12	6.5651e-10	2.04395e-16
Plk1	1.46825e-10	-0.251423	0.037	0.207	2.81523e-06	1.02484e-16	-0.319459	0.067	0.259	1.96503e-12	1.46825e-10	2.04969e-16
Mis18bp1	1.67713e-13	-0.259865	0.029	0.236	3.21574e-09	1.08943e-16	-0.262212	0.067	0.259	2.08887e-12	1.67713e-13	2.17886e-16
Ddx39	2.42807e-12	-0.285279	0.283	0.5	4.65557e-08	1.5838e-16	-0.267776	0.358	0.563	3.03678e-12	2.42807e-12	3.1676e-16
Ube2c	2.96757e-14	-1.01697	0.193	0.422	5.69002e-10	3.55927e-16	-0.954301	0.261	0.456	6.82454e-12	2.96757e-14	7.11853e-16
Plagl1	9.00254e-13	-0.415314	0.377	0.609	1.72615e-08	3.58108e-16	-0.485418	0.514	0.674	6.86637e-12	9.00254e-13	7.16216e-16
Alyref	6.12114e-16	-0.344963	0.582	0.736	1.17367e-11	2.14693e-14	-0.257504	0.708	0.791	4.11653e-10	2.14693e-14	1.22423e-15
Lig1	2.9489e-11	-0.423891	0.246	0.447	5.65422e-07	1.34289e-15	-0.39852	0.319	0.507	2.57485e-11	2.9489e-11	2.68577e-15
Dtymk	4.13653e-12	-0.301087	0.578	0.73	7.93138e-08	1.34971e-15	-0.255335	0.678	0.793	2.58793e-11	4.13653e-12	2.69942e-15
Ccnd2	5.66484e-08	0.301855	0.906	0.896	0.00108618	1.71916e-15	0.341915	0.919	0.912	3.29631e-11	5.66484e-08	3.43832e-15
Itga1	2.83639e-11	-0.449023	0.336	0.538	5.43849e-07	1.92721e-15	-0.42022	0.314	0.519	3.69524e-11	2.83639e-11	3.85443e-15
Gpc6	2.0514e-15	-0.398614	0.422	0.672	3.93336e-11	5.25087e-15	-0.304351	0.419	0.613	1.0068e-10	5.25087e-15	4.1028e-15
Slbp	2.18889e-15	-0.41675	0.393	0.62	4.19697e-11	1.07893e-09	-0.250175	0.597	0.683	2.06873e-05	1.07893e-09	4.37778e-15
Mcm3	2.22737e-15	-0.369051	0.189	0.448	4.27076e-11	1.60433e-09	-0.254053	0.386	0.526	3.07615e-05	1.60433e-09	4.45474e-15
Hist1h2ae	1.1805e-10	-0.914416	0.184	0.369	2.26349e-06	2.77834e-15	-1.04091	0.258	0.442	5.32718e-11	1.1805e-10	5.55667e-15
Hat1	2.53879e-12	-0.277732	0.295	0.524	4.86788e-08	2.97076e-15	-0.264037	0.406	0.588	5.69613e-11	2.53879e-12	5.94152e-15
Thbs2	9.07429e-15	0.332199	0.434	0.204	1.7399e-10	7.42461e-08	0.273691	0.389	0.262	0.00142359	7.42461e-08	1.81486e-14
Pmepa1	2.59693e-14	-0.445199	0.389	0.671	4.97935e-10	1.46057e-12	-0.374519	0.542	0.698	2.8005e-08	1.46057e-12	5.19386e-14
H1fx	9.29567e-12	-0.361465	0.844	0.894	1.78235e-07	3.79451e-14	-0.340091	0.856	0.906	7.2756e-10	9.29567e-12	7.58903e-14
2022-09-04	4.61464e-14	-0.426625	0.152	0.396	8.84811e-10	1.57563e-12	-0.338927	0.153	0.326	3.02112e-08	1.57563e-12	9.22928e-14
Hist1h1e	1.7837e-12	-0.596323	0.43	0.623	3.42007e-08	1.11042e-12	-0.564026	0.467	0.611	2.12913e-08	1.7837e-12	2.22085e-12
Gap43	4.46037e-12	0.285962	0.127	0.029	8.55232e-08	2.46381e-11	0.335591	0.147	0.056	4.72412e-07	2.46381e-11	8.92075e-12
Rgs2	1.58045e-08	-0.349222	0.029	0.166	0.000303036	5.61482e-12	-0.251162	0.036	0.176	1.07658e-07	1.58045e-08	1.12296e-11
Hmgb3	6.62823e-11	-0.319469	0.635	0.771	1.2709e-06	7.06349e-12	-0.277554	0.764	0.785	1.35435e-07	6.62823e-11	1.4127e-11
Mcm6	5.82057e-07	-0.272767	0.352	0.493	0.0111604	9.51559e-12	-0.280861	0.372	0.533	1.82452e-07	5.82057e-07	1.90312e-11
Crip1	9.95694e-12	-0.69569	0.389	0.585	1.90914e-07	1.10207e-05	-0.60475	0.564	0.619	0.211311	1.10207e-05	1.99139e-11
Igfbp6	4.35032e-06	-0.271466	0.025	0.123	0.083413	1.91465e-11	-0.34338	0.039	0.176	3.67115e-07	4.35032e-06	3.8293e-11
Dnajc9	7.66604e-10	-0.33717	0.369	0.538	1.46989e-05	1.4584e-10	-0.261044	0.472	0.603	2.79633e-06	7.66604e-10	2.9168e-10
Map1b	2.95465e-07	0.322437	0.402	0.267	0.00566524	2.93998e-10	0.255728	0.472	0.319	5.63713e-06	2.95465e-07	5.87997e-10
Clca3a1	1.17824e-08	-0.257225	0.107	0.279	0.000225916	7.29265e-10	-0.275684	0.142	0.289	1.39829e-05	1.17824e-08	1.45853e-09
Tubb5	2.35089e-09	-0.35508	1	0.998	4.50759e-05	1.09271e-09	-0.259238	1	0.997	2.09517e-05	2.35089e-09	2.18543e-09
Igfbp3	4.5924e-09	-0.457661	0.23	0.424	8.80546e-05	2.27446e-09	-0.363364	0.286	0.458	4.36106e-05	4.5924e-09	4.54893e-09
Csrp2	0.0803505	-0.254367	0.816	0.837	1	2.3468e-09	-0.457118	0.828	0.874	4.49976e-05	0.0803505	4.69361e-09
Atad2	3.13966e-07	-0.319377	0.262	0.409	0.00601998	2.45049e-09	-0.264276	0.317	0.46	4.69858e-05	3.13966e-07	4.90099e-09
Hist1h4d	0.00020545	-0.318732	0.287	0.384	1	2.65199e-09	-0.349852	0.272	0.403	5.08493e-05	0.00020545	5.30399e-09
Ptp4a3	3.42759e-09	-0.675382	0.164	0.345	6.57206e-05	7.81248e-08	-0.396799	0.214	0.348	0.00149796	7.81248e-08	6.85517e-09
Ace2	3.80043e-09	-0.45788	0.352	0.517	7.28695e-05	4.51571e-09	-0.335171	0.358	0.497	8.65843e-05	4.51571e-09	7.60086e-09
Igfbp5	0.000231204	-0.68286	0.455	0.533	1	5.29501e-09	-0.567832	0.439	0.574	0.000101527	0.000231204	1.059e-08
Pdgfrb	5.76367e-09	-0.363118	0.475	0.648	0.000110513	1.59952e-07	-0.287256	0.531	0.633	0.00306693	1.59952e-07	1.15273e-08
Akr1b7	2.54492e-08	-0.55083	0	0.115	0.000487963	6.08918e-09	-0.598259	0.008	0.102	0.000116754	2.54492e-08	1.21784e-08
H2afz	6.27542e-07	-0.361928	0.996	0.99	0.0120325	8.50345e-09	-0.37296	0.989	0.991	0.000163045	6.27542e-07	1.70069e-08
Crip2	1.21943e-08	-0.422713	0.295	0.469	0.000233814	2.30317e-07	-0.327733	0.406	0.532	0.00441609	2.30317e-07	2.43886e-08
Fabp5	3.98633e-05	-0.652764	0.471	0.588	0.76434	1.49564e-08	-0.502916	0.533	0.662	0.000286775	3.98633e-05	2.99129e-08
Arl6ip1	4.36885e-06	-0.570585	0.52	0.645	0.0837684	8.65216e-08	-0.539684	0.608	0.659	0.00165897	4.36885e-06	1.73043e-07
Cald1	1.01885e-06	-0.252403	0.988	0.996	0.0195354	3.22986e-06	-0.259193	0.997	0.99	0.0619292	3.22986e-06	2.03769e-06
Cst3	3.66107e-06	-0.299054	0.881	0.941	0.0701973	1.44999e-05	-0.296237	0.931	0.962	0.278022	1.44999e-05	7.32213e-06
Tinagl1	6.42646e-05	-0.441887	0.111	0.212	1	0.116968	-0.273727	0.169	0.192	1	0.116968	0.000128525
Gm13889	0.0083254	-0.538933	0.242	0.298	1	0.010045	-0.459604	0.225	0.27	1	0.010045	0.0165815
Actg2	0.291152	-1.09082	0.115	0.087	1	0.701044	-0.83644	0.125	0.111	1	0.701044	0.497534

## Sheet: Stroma_Subcluster.3.Mut.CTRL.m
Gene	CTRL_p_val	CTRL_avg_logFC	CTRL_pct.1	CTRL_pct.2	CTRL_p_val_adj	Mutant_p_val	Mutant_avg_logFC	Mutant_pct.1	Mutant_pct.2	Mutant_p_val_adj	max_pval	minimump_p_val
Serpini1	1.45593e-181	1.20249	0.703	0.022	2.79159e-177	1.29792e-265	0.983594	0.673	0.035	2.48863e-261	1.45593e-181	2.59584e-265
Akr1b7	8.85461e-123	1.6407	0.545	0.027	1.69778e-118	6.20934e-230	1.96477	0.581	0.029	1.19058e-225	8.85461e-123	1.24187e-229
Gata3	2.37946e-126	1.22732	0.658	0.06	4.56238e-122	2.81047e-228	1.13835	0.71	0.067	5.38879e-224	2.37946e-126	5.62094e-228
Tinagl1	8.5442e-136	1.48254	0.797	0.102	1.63827e-131	6.28498e-212	1.38913	0.805	0.113	1.20508e-207	8.5442e-136	1.257e-211
Lgi1	5.24695e-77	0.358906	0.312	0.008	1.00605e-72	1.21918e-211	0.489798	0.446	0.009	2.33765e-207	5.24695e-77	2.43836e-211
Nrarp	1.00883e-94	0.787477	0.446	0.025	1.93433e-90	3.39292e-195	0.765685	0.498	0.024	6.50558e-191	1.00883e-94	6.78583e-195
Rergl	1.73207e-84	0.621931	0.327	0.007	3.32107e-80	1.09236e-189	0.669977	0.399	0.008	2.09449e-185	1.73207e-84	2.18472e-189
Cox4i2	1.22163e-101	1.38476	0.891	0.277	2.34235e-97	5.65167e-186	1.35628	0.861	0.189	1.08365e-181	1.22163e-101	1.13033e-185
Gm13889	1.82224e-108	1.62251	0.847	0.202	3.49397e-104	1.6399e-178	1.5517	0.851	0.192	3.14434e-174	1.82224e-108	3.2798e-178
Esam	5.52333e-95	0.54755	0.47	0.03	1.05904e-90	4.63234e-177	0.618624	0.535	0.04	8.88205e-173	5.52333e-95	9.26468e-177
Mcam	8.4185e-80	0.67041	0.619	0.103	1.61416e-75	2.59125e-172	0.820084	0.733	0.113	4.96847e-168	8.4185e-80	5.18251e-172
Dkk2	7.43609e-109	1.7684	0.787	0.149	1.4258e-104	1.49626e-157	1.54664	0.809	0.186	2.86893e-153	7.43609e-109	2.99252e-157
Plce1	3.4496e-82	0.603419	0.48	0.047	6.61426e-78	4.05278e-155	0.63971	0.528	0.05	7.7708e-151	3.4496e-82	8.10556e-155
Mef2c	1.40337e-94	1.59063	0.941	0.433	2.69083e-90	9.51142e-152	1.6453	0.941	0.427	1.82372e-147	1.40337e-94	1.90228e-151
Tm4sf1	1.3506e-102	1.69814	0.99	0.522	2.58964e-98	9.55903e-151	1.54664	0.98	0.513	1.83285e-146	1.3506e-102	1.91181e-150
Adora1	1.21191e-97	0.46479	0.396	0.012	2.32371e-93	6.7838e-149	0.317867	0.31	0.005	1.30073e-144	1.21191e-97	1.35676e-148
Lmo7	1.29578e-114	1.35011	0.728	0.107	2.48452e-110	7.24426e-147	0.986395	0.686	0.126	1.38901e-142	1.29578e-114	1.44885e-146
Ndufa4l2	7.72028e-79	1.43538	0.97	0.585	1.48029e-74	1.1677e-142	1.50482	0.983	0.466	2.23894e-138	7.72028e-79	2.33539e-142
Heyl	1.22975e-60	0.61586	0.594	0.127	2.35793e-56	4.66593e-139	0.706145	0.703	0.126	8.94645e-135	1.22975e-60	9.33186e-139
Abcc9	5.54959e-70	0.886766	0.817	0.29	1.06408e-65	1.97667e-137	0.83848	0.785	0.194	3.79006e-133	5.54959e-70	3.95333e-137
Lsp1	7.45223e-96	-1.71611	0.416	0.976	1.42889e-91	2.09184e-136	-1.62976	0.479	0.962	4.01089e-132	7.45223e-96	4.18368e-136
Efnb2	1.5519e-81	0.58936	0.554	0.074	2.97562e-77	1.24052e-134	0.55612	0.574	0.082	2.37857e-130	1.5519e-81	2.48104e-134
Col1a1	4.52141e-85	-1.85989	0.485	0.982	8.66936e-81	9.83631e-134	-2.0904	0.644	0.981	1.88601e-129	4.52141e-85	1.96726e-133
Gja5	2.64981e-41	0.257299	0.168	0.005	5.08074e-37	1.10439e-131	0.349132	0.254	0.002	2.11755e-127	2.64981e-41	2.20878e-131
Gja4	2.83511e-73	0.632151	0.327	0.014	5.43604e-69	1.01221e-129	0.531849	0.363	0.021	1.9408e-125	2.83511e-73	2.02441e-129
Arap2	1.49699e-81	0.394535	0.401	0.024	2.87033e-77	1.19051e-127	0.317268	0.38	0.024	2.28269e-123	1.49699e-81	2.38102e-127
Crip2	2.10753e-74	1.13965	0.866	0.374	4.04098e-70	1.49257e-126	1.06094	0.96	0.461	2.86186e-122	2.10753e-74	2.98514e-126
Fam81a	9.45589e-72	0.425742	0.366	0.025	1.81307e-67	2.01786e-122	0.371728	0.383	0.028	3.86904e-118	9.45589e-72	4.03572e-122
Sfrp1	9.75752e-81	-1.48635	0.074	0.851	1.87091e-76	1.34212e-121	-1.48106	0.165	0.874	2.57337e-117	9.75752e-81	2.68423e-121
Ebf1	5.72054e-88	1.3611	1	0.8	1.09686e-83	4.45337e-119	1.22634	0.993	0.782	8.53889e-115	5.72054e-88	8.90674e-119
2022-09-04	4.11607e-44	0.829587	0.708	0.302	7.89216e-40	5.0852e-119	0.909254	0.812	0.24	9.75036e-115	4.11607e-44	1.01704e-118
Gng11	4.6069e-82	1.25398	0.965	0.734	8.83327e-78	7.09521e-119	1.0845	0.97	0.721	1.36043e-114	4.6069e-82	1.41904e-118
Slco2a1	2.80745e-78	0.560963	0.292	0.005	5.383e-74	1.2603e-118	0.494058	0.307	0.014	2.41649e-114	2.80745e-78	2.52059e-118
Pcdh1	1.39295e-74	0.376074	0.436	0.039	2.67084e-70	5.11847e-118	0.324563	0.459	0.05	9.81415e-114	1.39295e-74	1.02369e-117
Rasl12	9.26585e-51	0.387532	0.376	0.051	1.77663e-46	7.37379e-114	0.384498	0.518	0.072	1.41385e-109	9.26585e-51	1.47476e-113
Cdh11	3.48403e-76	-1.1348	0.356	0.936	6.68027e-72	3.37278e-112	-1.13258	0.459	0.926	6.46697e-108	3.48403e-76	6.74556e-112
Rapgef4	9.85724e-62	0.383089	0.287	0.014	1.89003e-57	5.51014e-111	0.327601	0.31	0.017	1.05651e-106	9.85724e-62	1.10203e-110
Mfge8	7.72014e-61	1.07812	0.955	0.747	1.48026e-56	2.16493e-110	1.10994	0.983	0.8	4.15103e-106	7.72014e-61	4.32985e-110
Rapgef5	2.08458e-31	0.277175	0.208	0.022	3.99697e-27	1.49875e-106	0.340499	0.307	0.018	2.87371e-102	2.08458e-31	2.99751e-106
Col3a1	1.22554e-74	-1.5226	0.609	0.994	2.34984e-70	4.21226e-105	-1.51341	0.792	0.991	8.07658e-101	1.22554e-74	8.42451e-105
Map3k7cl	8.90009e-45	0.395719	0.297	0.032	1.7065e-40	7.18657e-105	0.637429	0.465	0.063	1.37795e-100	8.90009e-45	1.43731e-104
Kcnj8	2.20502e-41	0.839358	0.886	0.561	4.22791e-37	3.44102e-104	0.958935	0.888	0.392	6.59781e-100	2.20502e-41	6.88204e-104
Trpc1	1.67337e-54	0.666395	0.644	0.192	3.20852e-50	2.29783e-103	0.594381	0.693	0.179	4.40586e-99	1.67337e-54	4.59566e-103
Rasl11a	3.67209e-60	0.94804	0.916	0.529	7.04086e-56	5.06798e-103	0.948292	0.921	0.512	9.71734e-99	3.67209e-60	1.0136e-102
Rgs5	3.32857e-68	1.14947	0.965	0.533	6.3822e-64	1.35749e-101	1.22688	0.875	0.381	2.60285e-97	3.32857e-68	2.71498e-101
Ptp4a3	6.33618e-77	1.79431	0.772	0.245	1.2149e-72	1.45677e-101	1.43738	0.772	0.276	2.79322e-97	6.33618e-77	2.91355e-101
Mfap4	2.53049e-63	-1.12785	0.124	0.814	4.85196e-59	5.57278e-98	-1.26737	0.238	0.84	1.06852e-93	2.53049e-63	1.11456e-97
Itga6	3.65517e-38	0.47006	0.416	0.096	7.00842e-34	3.22088e-97	0.478639	0.495	0.083	6.17572e-93	3.65517e-38	6.44177e-97
Gnas	4.17277e-74	0.765707	1	0.998	8.00086e-70	3.52376e-97	0.629292	1	1	6.75645e-93	4.17277e-74	7.04752e-97
Pdgfrb	1.65428e-60	0.869644	0.941	0.57	3.17192e-56	7.38272e-96	0.863453	0.947	0.579	1.41556e-91	1.65428e-60	1.47654e-95
Kcna5	2.38584e-47	0.274322	0.163	0.001	4.57461e-43	3.013e-94	0.300779	0.211	0.005	5.77712e-90	2.38584e-47	6.026e-94
Emilin1	1.29006e-61	-0.904702	0.51	0.946	2.47356e-57	5.23139e-94	-0.853923	0.624	0.944	1.00307e-89	1.29006e-61	1.04628e-93
Itga4	2.35379e-68	0.63526	0.579	0.105	4.51316e-64	1.34318e-93	0.536709	0.607	0.138	2.57542e-89	2.35379e-68	2.68637e-93
Atp1b2	1.75495e-71	0.640224	0.683	0.164	3.36494e-67	9.46064e-92	0.520169	0.673	0.178	1.81398e-87	1.75495e-71	1.89213e-91
Map3k20	3.63379e-50	0.551438	0.564	0.152	6.96743e-46	6.30124e-91	0.470727	0.601	0.15	1.2082e-86	3.63379e-50	1.26025e-90
Tmem51	5.13178e-80	0.62721	0.594	0.095	9.83967e-76	6.81014e-91	0.491291	0.551	0.117	1.30578e-86	5.13178e-80	1.36203e-90
Cald1	1.19687e-49	0.608307	1	0.994	2.29489e-45	1.8228e-89	0.720403	1	0.989	3.49503e-85	1.19687e-49	3.6456e-89
Clmp	1.16594e-46	-0.664078	0.025	0.621	2.23556e-42	1.69575e-88	-0.741215	0.056	0.713	3.25143e-84	1.16594e-46	3.3915e-88
Rbp1	3.96142e-61	-0.975576	0.599	0.954	7.59562e-57	2.47572e-87	-0.852153	0.776	0.968	4.74694e-83	3.96142e-61	4.95143e-87
Slc12a2	3.58394e-87	1.44086	0.787	0.217	6.87184e-83	2.13273e-83	0.893547	0.696	0.242	4.0893e-79	2.13273e-83	7.16787e-87
Uchl1	1.08643e-39	0.357842	0.332	0.052	2.08312e-35	1.7607e-86	0.504986	0.564	0.129	3.37597e-82	1.08643e-39	3.5214e-86
Cspg4	6.25835e-57	0.631263	0.708	0.231	1.19998e-52	3.60983e-83	0.584064	0.716	0.247	6.92148e-79	6.25835e-57	7.21966e-83
Rab6b	1.90264e-49	0.404491	0.317	0.034	3.64813e-45	2.79858e-82	0.365676	0.36	0.047	5.36599e-78	1.90264e-49	5.59715e-82
Fam107b	2.618e-33	0.433696	0.545	0.195	5.01976e-29	6.39456e-82	0.512928	0.66	0.205	1.22609e-77	2.618e-33	1.27891e-81
Fbln1	3.34007e-49	-0.907328	0.584	0.931	6.40425e-45	2.28388e-81	-0.940042	0.644	0.93	4.3791e-77	3.34007e-49	4.56775e-81
Emid1	2.73229e-45	0.734788	0.658	0.248	5.23889e-41	6.3345e-81	0.769856	0.743	0.288	1.21458e-76	2.73229e-45	1.2669e-80
Nab1	2.63277e-54	0.734266	0.708	0.265	5.04808e-50	1.59072e-80	0.690675	0.729	0.305	3.05004e-76	2.63277e-54	3.18144e-80
Tbx2	2.47292e-44	0.752877	0.832	0.48	4.74157e-40	2.24502e-80	0.764625	0.858	0.444	4.3046e-76	2.47292e-44	4.49004e-80
Col1a2	4.81314e-59	-1.23298	0.856	0.992	9.22871e-55	8.33373e-80	-1.31188	0.927	0.99	1.59791e-75	4.81314e-59	1.66675e-79
Blmh	1.10017e-70	1.0097	0.97	0.751	2.10946e-66	9.15364e-79	0.764599	0.977	0.826	1.75512e-74	1.10017e-70	1.83073e-78
Cd200	9.82549e-74	0.650737	0.505	0.065	1.88394e-69	1.92424e-78	0.413158	0.455	0.084	3.68954e-74	9.82549e-74	3.84848e-78
Col6a1	9.60261e-49	-0.994304	0.158	0.747	1.8412e-44	1.20143e-77	-1.08998	0.257	0.792	2.30362e-73	9.60261e-49	2.40286e-77
Itga1	2.21125e-27	0.600142	0.757	0.466	4.23985e-23	2.49553e-77	0.751962	0.875	0.445	4.78492e-73	2.21125e-27	4.99105e-77
Nostrin	4.69288e-59	1.0777	0.678	0.215	8.99813e-55	3.7627e-77	0.888977	0.617	0.208	7.21459e-73	4.69288e-59	7.52539e-77
Slc9a3r1	6.03903e-35	0.32445	0.332	0.063	1.15792e-30	4.66703e-77	0.352895	0.455	0.087	8.94856e-73	6.03903e-35	9.33406e-77
Mest	2.50135e-54	-1.12504	0.53	0.912	4.7961e-50	2.55326e-76	-0.979497	0.703	0.961	4.89563e-72	2.50135e-54	5.10653e-76
Pbx1	4.84707e-57	-0.904238	0.777	0.965	9.29377e-53	1.00783e-73	-0.82833	0.861	0.957	1.93242e-69	4.84707e-57	2.01567e-73
Apbb2	5.14141e-58	0.689324	0.871	0.412	9.85814e-54	1.66291e-72	0.596202	0.858	0.462	3.18847e-68	5.14141e-58	3.32582e-72
Nfix	2.3304e-33	-0.546884	0.545	0.876	4.46832e-29	5.27144e-72	-0.680422	0.581	0.909	1.01075e-67	2.3304e-33	1.05429e-71
Nrp1	1.0125e-63	1.05075	0.97	0.662	1.94137e-59	7.06319e-72	0.719129	0.957	0.688	1.3543e-67	1.0125e-63	1.41264e-71
Foxs1	2.94415e-29	0.33512	0.342	0.077	5.64512e-25	2.4378e-71	0.404801	0.482	0.102	4.67424e-67	2.94415e-29	4.87561e-71
Crip1	2.17432e-48	1.33548	0.851	0.507	4.16904e-44	1.14025e-70	1.27044	0.914	0.574	2.18632e-66	2.17432e-48	2.2805e-70
Cpm	3.07108e-53	0.853066	0.663	0.203	5.88849e-49	1.66392e-70	0.579925	0.545	0.149	3.1904e-66	3.07108e-53	3.32784e-70
Zfhx3	1.84561e-38	0.745955	0.738	0.38	3.53877e-34	1.90563e-70	0.729618	0.832	0.421	3.65386e-66	1.84561e-38	3.81126e-70
Fam241a	4.05166e-41	0.287313	0.282	0.033	7.76865e-37	3.59282e-70	0.279789	0.284	0.032	6.88888e-66	4.05166e-41	7.18564e-70
Penk	1.33557e-55	-2.03772	0.099	0.711	2.56083e-51	4.2889e-70	-1.75313	0.152	0.682	8.22354e-66	1.33557e-55	8.5778e-70
Olfml3	2.33444e-53	-0.948302	0.183	0.779	4.47605e-49	8.25595e-70	-0.866429	0.284	0.778	1.583e-65	2.33444e-53	1.65119e-69
Nrgn	6.93751e-47	0.458742	0.347	0.048	1.3302e-42	8.50012e-70	0.333554	0.363	0.059	1.62981e-65	6.93751e-47	1.70002e-69
Epas1	4.75055e-45	0.548652	0.535	0.14	9.1087e-41	2.24247e-69	0.446912	0.597	0.168	4.29972e-65	4.75055e-45	4.48495e-69
Tcf21	3.08965e-63	-1.11573	0.267	0.854	5.92409e-59	3.50915e-69	-0.947999	0.294	0.758	6.72844e-65	3.08965e-63	7.0183e-69
Dcn	6.68038e-37	-2.12173	0.134	0.61	1.2809e-32	5.12168e-69	-2.27869	0.234	0.729	9.82031e-65	6.68038e-37	1.02434e-68
Pkdcc	5.01047e-43	-0.827705	0.515	0.882	9.60707e-39	1.14336e-68	-0.878634	0.624	0.904	2.19227e-64	5.01047e-43	2.28672e-68
S100a10	2.78447e-53	-1.01532	0.599	0.948	5.33895e-49	1.40597e-68	-0.941365	0.756	0.952	2.69581e-64	2.78447e-53	2.81195e-68
Col6a2	4.94885e-40	-0.862829	0.213	0.731	9.48893e-36	1.5183e-68	-0.995288	0.294	0.782	2.91119e-64	4.94885e-40	3.03661e-68
Arpc1b	7.89685e-25	0.475168	0.96	0.894	1.51414e-20	3.71126e-68	0.642851	0.983	0.931	7.11597e-64	7.89685e-25	7.42252e-68
Hrc	3.03761e-39	0.496005	0.361	0.067	5.82431e-35	4.11112e-68	0.412264	0.383	0.069	7.88266e-64	3.03761e-39	8.22224e-68
1500009L16Rik	6.706e-38	0.716653	0.797	0.488	1.28581e-33	2.73408e-67	0.627955	0.881	0.533	5.24233e-63	6.706e-38	5.46816e-67
Rrad	5.77493e-66	0.605283	0.416	0.045	1.10729e-61	5.38155e-67	0.360271	0.29	0.036	1.03186e-62	5.77493e-66	1.07631e-66
Ctsl	9.50701e-46	-0.748544	0.653	0.955	1.82287e-41	2.23398e-66	-0.703857	0.723	0.953	4.28343e-62	9.50701e-46	4.46795e-66
Slc25a5	1.4037e-31	0.634389	0.95	0.826	2.69145e-27	3.08671e-66	0.695706	0.954	0.847	5.91847e-62	1.4037e-31	6.17343e-66
Igfbp7	8.12309e-47	0.935709	0.985	0.94	1.55752e-42	1.92241e-65	0.807457	0.997	0.946	3.68602e-61	8.12309e-47	3.84481e-65
Hmcn1	1.65616e-56	-1.08163	0.163	0.766	3.17552e-52	4.47492e-63	-0.934869	0.261	0.715	8.5802e-59	1.65616e-56	8.94983e-63
Tspan15	2.57817e-22	0.272857	0.257	0.059	4.94338e-18	6.72214e-63	0.306445	0.36	0.066	1.2889e-58	2.57817e-22	1.34443e-62
Adgrg6	1.71225e-24	0.342261	0.312	0.08	3.28306e-20	1.06811e-62	0.328732	0.386	0.075	2.048e-58	1.71225e-24	2.13623e-62
Fbln5	2.01517e-50	-1.01361	0.089	0.692	3.86388e-46	1.90269e-62	-0.947334	0.208	0.721	3.64821e-58	2.01517e-50	3.80537e-62
Tshz2	8.91876e-35	-0.71937	0.515	0.881	1.71008e-30	2.96385e-62	-0.817875	0.624	0.921	5.68289e-58	8.91876e-35	5.9277e-62
Gpc3	1.61622e-41	-0.728026	0.95	0.98	3.09894e-37	3.01921e-62	-0.740016	0.97	0.975	5.78904e-58	1.61622e-41	6.03843e-62
Inpp5b	1.08193e-31	0.293922	0.411	0.11	2.07449e-27	4.07247e-62	0.293411	0.485	0.123	7.80855e-58	1.08193e-31	8.14494e-62
Col4a1	1.86113e-38	0.603204	1	0.865	3.56854e-34	2.58766e-61	0.697907	0.997	0.87	4.96159e-57	1.86113e-38	5.17533e-61
Aoc3	2.76869e-25	0.31877	0.267	0.055	5.30868e-21	4.13803e-61	0.319393	0.337	0.057	7.93426e-57	2.76869e-25	8.27607e-61
Notch3	2.18556e-37	0.572399	0.594	0.214	4.1906e-33	7.36916e-61	0.558133	0.637	0.245	1.41296e-56	2.18556e-37	1.47383e-60
Cited2	5.12205e-52	0.902787	0.896	0.574	9.82101e-48	7.33433e-60	0.841699	0.871	0.601	1.40628e-55	5.12205e-52	1.46687e-59
Myo1e	1.03163e-37	0.496439	0.49	0.142	1.97805e-33	1.00271e-59	0.404142	0.518	0.15	1.92261e-55	1.03163e-37	2.00543e-59
Plac8	1.50506e-50	-1.16245	0.158	0.736	2.88581e-46	9.85271e-59	-0.946602	0.178	0.668	1.88916e-54	1.50506e-50	1.97054e-58
Afap1l2	5.33741e-52	0.55581	0.673	0.207	1.0234e-47	1.22521e-58	0.407226	0.657	0.238	2.34922e-54	5.33741e-52	2.45042e-58
Jag1	1.19625e-22	0.299988	0.292	0.075	2.29368e-18	2.25304e-58	0.381653	0.373	0.074	4.31998e-54	1.19625e-22	4.50608e-58
Higd1b	1.60655e-11	0.342666	0.153	0.039	3.0804e-07	4.40706e-58	0.370591	0.178	0.012	8.45009e-54	1.60655e-11	8.81411e-58
Agtr1a	8.77117e-46	0.577667	0.564	0.159	1.68179e-41	6.41001e-58	0.425987	0.571	0.175	1.22905e-53	8.77117e-46	1.282e-57
Klhl23	3.90816e-17	0.370897	0.475	0.235	7.4935e-13	1.37481e-57	0.485585	0.637	0.257	2.63607e-53	3.90816e-17	2.74962e-57
Col14a1	2.48493e-35	-1.01273	0.045	0.528	4.76461e-31	6.22131e-57	-1.12374	0.109	0.6	1.19287e-52	2.48493e-35	1.24426e-56
Unc5b	3.00841e-21	0.285663	0.361	0.116	5.76832e-17	1.0953e-56	0.320496	0.508	0.146	2.10013e-52	3.00841e-21	2.1906e-56
Ddah1	2.2003e-43	0.66351	0.688	0.284	4.21885e-39	1.6253e-56	0.611711	0.729	0.372	3.11634e-52	2.2003e-43	3.25059e-56
Nrip2	1.65246e-19	0.391805	0.203	0.042	3.16843e-15	1.69603e-56	0.467735	0.287	0.046	3.25197e-52	1.65246e-19	3.39207e-56
Hopx	6.00147e-40	0.687398	0.53	0.166	1.15072e-35	4.73834e-56	0.51062	0.512	0.156	9.08529e-52	6.00147e-40	9.47667e-56
Btg1	2.38155e-45	0.952959	0.921	0.714	4.56638e-41	6.06595e-56	0.80027	0.934	0.697	1.16309e-51	2.38155e-45	1.21319e-55
Gprin3	6.29793e-39	0.370146	0.282	0.036	1.20757e-34	9.77399e-56	0.252652	0.257	0.035	1.87406e-51	6.29793e-39	1.9548e-55
Fzd2	7.4674e-33	-0.533129	0.347	0.756	1.4318e-28	6.37222e-55	-0.556001	0.436	0.811	1.22181e-50	7.4674e-33	1.27444e-54
Meis1	2.31952e-44	-0.673101	0.406	0.852	4.44745e-40	1.33753e-54	-0.561104	0.548	0.847	2.56458e-50	2.31952e-44	2.67506e-54
Bcam	7.05585e-38	0.702352	0.554	0.196	1.35289e-33	2.64863e-54	0.596599	0.591	0.223	5.07848e-50	7.05585e-38	5.29726e-54
Ldb2	2.74279e-38	-0.687492	0.163	0.655	5.25903e-34	2.65715e-54	-0.620393	0.238	0.678	5.09482e-50	2.74279e-38	5.31431e-54
Ncam1	2.90483e-33	-0.961817	0.332	0.715	5.56971e-29	3.29108e-54	-0.889919	0.413	0.758	6.31032e-50	2.90483e-33	6.58216e-54
Pmp22	6.18966e-22	-0.482907	0.248	0.624	1.18681e-17	3.92189e-52	-0.684472	0.244	0.686	7.51984e-48	6.18966e-22	7.84379e-52
Gprc5c	3.47209e-22	0.334934	0.401	0.145	6.65738e-18	6.33193e-52	0.315892	0.492	0.149	1.21408e-47	3.47209e-22	1.26639e-51
Emcn	7.37488e-22	0.433527	0.629	0.323	1.41406e-17	1.09483e-51	0.562479	0.713	0.342	2.09923e-47	7.37488e-22	2.18966e-51
Reln	9.81747e-20	0.480029	0.465	0.204	1.8824e-15	1.87464e-51	0.567055	0.568	0.199	3.59444e-47	9.81747e-20	3.74928e-51
Igfbp4	3.69463e-34	-0.601046	0.639	0.947	7.08409e-30	8.18841e-51	-0.545121	0.809	0.966	1.57005e-46	3.69463e-34	1.63768e-50
Alcam	3.0395e-31	-0.830731	0.495	0.817	5.82794e-27	3.02291e-50	-0.882216	0.578	0.834	5.79613e-46	3.0395e-31	6.04582e-50
Rcsd1	3.84808e-30	0.532864	0.762	0.479	7.37831e-26	4.47637e-50	0.479633	0.828	0.488	8.58298e-46	3.84808e-30	8.95273e-50
Cfh	3.89579e-42	-0.958358	0.55	0.888	7.46979e-38	3.06159e-49	-0.887081	0.578	0.808	5.87029e-45	3.89579e-42	6.12318e-49
Lpar1	6.06056e-30	-0.513338	0.045	0.49	1.16205e-25	3.58552e-49	-0.496044	0.05	0.511	6.87487e-45	6.06056e-30	7.17104e-49
Fermt2	5.65961e-32	0.51341	0.97	0.902	1.08517e-27	2.63347e-48	0.44267	0.977	0.9	5.04941e-44	5.65961e-32	5.26694e-48
Ndufa4	4.82833e-28	-0.44456	0.881	0.98	9.25784e-24	2.90173e-47	-0.423354	0.941	0.989	5.56377e-43	4.82833e-28	5.80345e-47
Rbpms	3.61259e-30	0.613685	0.96	0.859	6.92679e-26	8.2134e-47	0.553882	0.977	0.855	1.57484e-42	3.61259e-30	1.64268e-46
Ano1	8.50278e-25	0.395484	0.495	0.195	1.63032e-20	1.03787e-46	0.315511	0.548	0.186	1.99e-42	8.50278e-25	2.07573e-46
Aprt	3.74604e-37	-0.632176	0.639	0.915	7.18266e-33	1.05754e-46	-0.57722	0.703	0.904	2.02773e-42	3.74604e-37	2.11508e-46
Mustn1	6.70081e-18	0.476242	0.163	0.028	1.28481e-13	4.70512e-46	0.413379	0.185	0.02	9.02159e-42	6.70081e-18	9.41023e-46
6030408B16Rik	4.41746e-26	-0.458884	0.054	0.455	8.47005e-22	2.09111e-45	-0.498969	0.083	0.519	4.00949e-41	4.41746e-26	4.18222e-45
Gimap6	1.38431e-21	0.32114	0.465	0.189	2.65427e-17	6.2216e-45	0.30033	0.449	0.142	1.19293e-40	1.38431e-21	1.24432e-44
Hmgcs2	4.26694e-27	0.505841	0.322	0.075	8.18144e-23	1.02306e-44	0.403216	0.3	0.063	1.96161e-40	4.26694e-27	2.04611e-44
Des	1.05573e-17	0.475007	0.673	0.416	2.02426e-13	1.46279e-44	0.521284	0.647	0.288	2.80476e-40	1.05573e-17	2.92559e-44
Marcks	3.05911e-21	-0.405456	0.886	0.979	5.86554e-17	1.55461e-44	-0.488357	0.96	0.985	2.9808e-40	3.05911e-21	3.10921e-44
Errfi1	1.17033e-23	0.519179	0.465	0.189	2.244e-19	3.58771e-44	0.470654	0.495	0.177	6.87907e-40	1.17033e-23	7.17541e-44
Limch1	1.31576e-29	0.49402	0.312	0.066	2.52284e-25	4.6296e-44	0.513354	0.356	0.094	8.8768e-40	1.31576e-29	9.25921e-44
Capg	8.50807e-20	0.442414	0.594	0.327	1.63134e-15	6.23589e-44	0.444672	0.653	0.311	1.19567e-39	8.50807e-20	1.24718e-43
Oaf	1.43512e-21	-0.378275	0.257	0.642	2.75169e-17	1.91835e-43	-0.49592	0.37	0.756	3.67824e-39	1.43512e-21	3.83669e-43
Pcolce	8.1555e-36	-0.750474	0.361	0.783	1.56374e-31	4.95458e-43	-0.638696	0.545	0.81	9.49992e-39	8.1555e-36	9.90917e-43
Pdlim4	1.01623e-35	-0.544145	0.223	0.689	1.94851e-31	8.66847e-43	-0.438278	0.271	0.673	1.66209e-38	1.01623e-35	1.73369e-42
Pdgfa	2.92867e-25	0.589664	0.436	0.156	5.61543e-21	9.53241e-43	0.578746	0.521	0.207	1.82774e-38	2.92867e-25	1.90648e-42
Ndrg2	2.04653e-42	0.702357	0.639	0.232	3.92401e-38	8.66486e-40	0.467204	0.63	0.281	1.6614e-35	8.66486e-40	4.09305e-42
Plxnd1	1.88643e-29	0.403577	0.589	0.256	3.61703e-25	5.91998e-42	0.341215	0.62	0.278	1.1351e-37	1.88643e-29	1.184e-41
Sh2b3	7.14608e-22	0.324208	0.406	0.148	1.37019e-17	1.11629e-41	0.284077	0.485	0.173	2.14037e-37	7.14608e-22	2.23258e-41
Mecom	7.26757e-20	0.569389	0.743	0.483	1.39348e-15	1.13223e-41	0.605444	0.785	0.433	2.17094e-37	7.26757e-20	2.26447e-41
Maged1	6.8379e-27	-0.445465	0.787	0.953	1.3111e-22	2.05658e-41	-0.402407	0.914	0.978	3.94329e-37	6.8379e-27	4.11317e-41
Cpd	7.78476e-33	0.546721	0.693	0.349	1.49265e-28	2.19283e-41	0.399176	0.703	0.354	4.20453e-37	7.78476e-33	4.38566e-41
Arhgef17	5.60692e-20	0.387318	0.55	0.29	1.07507e-15	3.73814e-41	0.344421	0.66	0.317	7.16751e-37	5.60692e-20	7.47628e-41
Snrk	6.12416e-40	0.639762	0.683	0.297	1.17425e-35	1.11967e-40	0.403564	0.647	0.312	2.14685e-36	6.12416e-40	2.23933e-40
Col4a2	3.05192e-28	0.55371	0.941	0.769	5.85176e-24	1.54819e-40	0.509178	0.96	0.775	2.9685e-36	3.05192e-28	3.09638e-40
Hbegf	1.95411e-17	0.295627	0.307	0.1	3.74681e-13	1.72552e-40	0.285295	0.36	0.099	3.30852e-36	1.95411e-17	3.45105e-40
Iqgap1	2.22098e-40	0.674814	0.837	0.53	4.25851e-36	2.26677e-40	0.479989	0.865	0.588	4.34631e-36	2.26677e-40	4.44196e-40
Rap1a	4.45585e-21	0.557448	0.866	0.754	8.54365e-17	2.55298e-40	0.553369	0.941	0.79	4.89508e-36	4.45585e-21	5.10595e-40
Ptn	3.7992e-40	-1.0659	0.797	0.964	7.28459e-36	2.01578e-31	-0.712458	0.884	0.959	3.86505e-27	2.01578e-31	7.59841e-40
Vcan	4.19029e-26	-0.597934	0.129	0.524	8.03445e-22	6.09168e-40	-0.657531	0.211	0.594	1.16802e-35	4.19029e-26	1.21834e-39
Atxn7l3b	6.74204e-19	-0.305861	0.941	0.973	1.29272e-14	6.80738e-40	-0.354956	0.97	0.985	1.30525e-35	6.74204e-19	1.36148e-39
Islr	2.61217e-26	-0.482154	0.248	0.656	5.00857e-22	7.28387e-40	-0.53565	0.314	0.704	1.39661e-35	2.61217e-26	1.45677e-39
Plcl1	1.15384e-21	0.30976	0.49	0.196	2.21237e-17	7.61776e-40	0.321018	0.528	0.206	1.46063e-35	1.15384e-21	1.52355e-39
Oaz2	5.85034e-20	0.43028	0.777	0.574	1.12174e-15	1.50485e-39	0.417946	0.848	0.626	2.8854e-35	5.85034e-20	3.0097e-39
Svil	5.09383e-34	-0.604136	0.223	0.652	9.7669e-30	1.58795e-39	-0.488376	0.32	0.669	3.04473e-35	5.09383e-34	3.17589e-39
Meg3	4.47127e-33	-0.974479	0.421	0.841	8.5732e-29	2.45974e-39	-0.986729	0.601	0.908	4.71631e-35	4.47127e-33	4.91948e-39
Vasp	8.94654e-27	0.495181	0.856	0.621	1.71541e-22	3.33861e-39	0.444274	0.888	0.648	6.40145e-35	8.94654e-27	6.67722e-39
Rock1	5.0363e-24	0.44896	0.876	0.741	9.6566e-20	4.53665e-39	0.451109	0.908	0.759	8.69857e-35	5.0363e-24	9.0733e-39
Frem2	1.11333e-16	0.315717	0.262	0.081	2.1347e-12	6.05232e-39	0.266683	0.271	0.058	1.16047e-34	1.11333e-16	1.21046e-38
Cpne2	6.3372e-39	0.499592	0.49	0.137	1.21509e-34	6.59108e-35	0.293955	0.442	0.162	1.26377e-30	6.59108e-35	1.26744e-38
Rnf144a	2.8382e-28	0.47231	0.52	0.212	5.44196e-24	7.71292e-39	0.353254	0.538	0.22	1.47888e-34	2.8382e-28	1.54258e-38
Plekhh3	2.1567e-25	0.409816	0.54	0.239	4.13526e-21	7.72003e-39	0.3239	0.597	0.269	1.48024e-34	2.1567e-25	1.54401e-38
Dnm3os	2.05649e-22	-0.391873	0.079	0.455	3.94312e-18	9.70879e-39	-0.447102	0.168	0.565	1.86156e-34	2.05649e-22	1.94176e-38
Rasgrp2	4.96073e-25	0.522609	0.891	0.688	9.51171e-21	1.09988e-38	0.460177	0.917	0.681	2.10891e-34	4.96073e-25	2.19976e-38
Arap1	1.68369e-20	-0.382141	0.168	0.542	3.2283e-16	1.1223e-38	-0.439453	0.248	0.64	2.15189e-34	1.68369e-20	2.24459e-38
Snai2	3.58002e-33	-0.694356	0.277	0.705	6.86433e-29	2.41823e-38	-0.597092	0.396	0.707	4.63672e-34	3.58002e-33	4.83647e-38
Rcan2	6.47279e-11	0.283803	0.262	0.108	1.24109e-06	2.64848e-38	0.292785	0.343	0.094	5.0782e-34	6.47279e-11	5.29696e-38
Plscr1	2.69973e-17	0.332835	0.282	0.092	5.17646e-13	2.65245e-38	0.265825	0.32	0.082	5.08581e-34	2.69973e-17	5.3049e-38
Sncg	1.8483e-23	0.335436	0.139	0.012	3.54393e-19	3.34141e-38	0.410819	0.198	0.031	6.40682e-34	1.8483e-23	6.68282e-38
Fstl1	1.05652e-27	-0.496074	0.817	0.955	2.02577e-23	5.78824e-38	-0.448122	0.921	0.969	1.10984e-33	1.05652e-27	1.15765e-37
Emp3	6.99315e-16	-0.310324	0.926	0.975	1.34087e-11	9.31062e-38	-0.380238	0.947	0.986	1.78522e-33	6.99315e-16	1.86212e-37
Mical1	3.12151e-20	0.258676	0.465	0.191	5.98518e-16	1.00191e-37	0.279053	0.545	0.221	1.92106e-33	3.12151e-20	2.00382e-37
Mfap2	1.44426e-19	-0.362226	0.752	0.92	2.76922e-15	1.46914e-37	-0.491038	0.842	0.948	2.81693e-33	1.44426e-19	2.93829e-37
Fabp5	1.59267e-29	1.03427	0.782	0.536	3.05379e-25	1.65156e-37	1.0475	0.802	0.626	3.1667e-33	1.59267e-29	3.30311e-37
Gucy1b1	3.16943e-16	0.415571	0.748	0.543	6.07706e-12	2.09564e-37	0.453442	0.785	0.493	4.01819e-33	3.16943e-16	4.19129e-37
Matn2	8.04619e-22	-0.530106	0.198	0.561	1.54278e-17	2.82506e-37	-0.609358	0.244	0.63	5.41678e-33	8.04619e-22	5.65013e-37
Colec12	1.2133e-26	-0.505356	0.277	0.675	2.32638e-22	3.39431e-37	-0.451523	0.333	0.694	6.50825e-33	1.2133e-26	6.78862e-37
Angpt2	3.49343e-34	0.464905	0.436	0.109	6.6983e-30	4.71021e-37	0.38609	0.432	0.142	9.03136e-33	3.49343e-34	9.42042e-37
Ogn	1.78931e-29	-0.721678	0.109	0.554	3.43083e-25	5.19388e-37	-0.692087	0.182	0.569	9.95875e-33	1.78931e-29	1.03878e-36
Frem1	4.04255e-31	-0.522144	0.094	0.539	7.75119e-27	5.81512e-37	-0.443242	0.125	0.509	1.11499e-32	4.04255e-31	1.16302e-36
Cd151	4.2586e-21	0.432364	0.619	0.339	8.16545e-17	9.46141e-37	0.375145	0.677	0.364	1.81413e-32	4.2586e-21	1.89228e-36
Gas1	3.0211e-17	-0.400066	0.386	0.717	5.79266e-13	1.01673e-36	-0.602132	0.35	0.696	1.94949e-32	3.0211e-17	2.03347e-36
Cd248	1.60625e-36	0.613995	0.802	0.444	3.07983e-32	2.33406e-34	0.394987	0.809	0.557	4.47532e-30	2.33406e-34	3.2125e-36
Hoxd11	8.70938e-24	-0.507415	0.485	0.786	1.66994e-19	3.06645e-36	-0.52589	0.521	0.77	5.87962e-32	8.70938e-24	6.13291e-36
Id1	2.77138e-14	0.45106	0.866	0.717	5.31385e-10	3.61436e-36	0.531646	0.881	0.638	6.93018e-32	2.77138e-14	7.22872e-36
Slit3	1.03816e-35	0.527999	0.322	0.057	1.99056e-31	4.11741e-36	0.507812	0.34	0.102	7.89471e-32	1.03816e-35	8.23481e-36
G0s2	1.31993e-34	-1.07026	0.277	0.71	2.53083e-30	1.04207e-35	-0.784327	0.261	0.618	1.99807e-31	1.31993e-34	2.08414e-35
Flrt2	1.1021e-27	-0.513625	0.045	0.46	2.11316e-23	1.37133e-35	-0.479539	0.135	0.496	2.62939e-31	1.1021e-27	2.74266e-35
Etl4	2.40539e-23	-0.437783	0.119	0.498	4.6121e-19	2.94718e-35	-0.437475	0.149	0.515	5.65092e-31	2.40539e-23	5.89436e-35
Tmem45a	1.54752e-24	-0.392062	0.094	0.485	2.96721e-20	6.01932e-35	-0.344377	0.099	0.48	1.15414e-30	1.54752e-24	1.20386e-34
Creb3l1	1.37192e-15	-0.304996	0.089	0.368	2.63053e-11	6.74646e-35	-0.411764	0.132	0.5	1.29357e-30	1.37192e-15	1.34929e-34
Plagl1	5.93848e-28	-0.62526	0.213	0.627	1.13864e-23	2.90465e-34	-0.629304	0.366	0.689	5.56937e-30	5.93848e-28	5.8093e-34
S100a11	1.05378e-12	-0.319057	0.936	0.975	2.02052e-08	4.73482e-34	-0.411755	0.957	0.983	9.07855e-30	1.05378e-12	9.46965e-34
Bicc1	1.60574e-23	-0.468809	0.351	0.715	3.07885e-19	5.43827e-34	-0.460032	0.455	0.717	1.04273e-29	1.60574e-23	1.08765e-33
Prkar1a	9.57803e-21	0.388106	0.946	0.886	1.83649e-16	7.11371e-34	0.362202	0.957	0.905	1.36398e-29	9.57803e-21	1.42274e-33
Arid5b	2.9763e-29	0.626423	0.955	0.828	5.70675e-25	1.13032e-33	0.506052	0.931	0.798	2.16728e-29	2.9763e-29	2.26064e-33
Fjx1	2.00448e-12	0.318231	0.46	0.257	3.84338e-08	1.13792e-33	0.439395	0.584	0.284	2.18185e-29	2.00448e-12	2.27584e-33
Nkain4	1.03451e-23	-0.438575	0.064	0.446	1.98356e-19	1.33024e-33	-0.387756	0.079	0.444	2.5506e-29	1.03451e-23	2.66048e-33
Cdc42ep3	4.20654e-17	-0.481978	0.292	0.62	8.06562e-13	2.28168e-33	-0.65495	0.215	0.568	4.3749e-29	4.20654e-17	4.56337e-33
Carmn	1.22536e-10	0.273324	0.579	0.376	2.34951e-06	2.64683e-33	0.41421	0.713	0.389	5.07503e-29	1.22536e-10	5.29366e-33
Sertad4	2.69789e-24	-0.41527	0.04	0.413	5.17294e-20	3.15594e-33	-0.350083	0.056	0.416	6.0512e-29	2.69789e-24	6.31188e-33
Abcg2	2.48013e-17	0.419413	0.589	0.352	4.75541e-13	3.43035e-33	0.379367	0.68	0.393	6.57736e-29	2.48013e-17	6.86071e-33
Nr2f2	1.38552e-21	-0.412112	0.837	0.948	2.65661e-17	3.88711e-33	-0.445255	0.911	0.935	7.45315e-29	1.38552e-21	7.77423e-33
Col16a1	7.42513e-24	-0.408989	0.119	0.491	1.42369e-19	4.06717e-33	-0.40917	0.172	0.529	7.7984e-29	7.42513e-24	8.13435e-33
Ifitm1	2.94068e-26	-0.4167	0.564	0.878	5.63845e-22	4.82595e-33	-0.356896	0.545	0.835	9.25328e-29	2.94068e-26	9.6519e-33
Myh10	1.76535e-21	-0.507687	0.629	0.851	3.38488e-17	1.17245e-32	-0.502756	0.673	0.864	2.24805e-28	1.76535e-21	2.3449e-32
Rbpms2	2.41256e-11	0.253658	0.436	0.253	4.62585e-07	1.27819e-32	0.280728	0.561	0.275	2.45081e-28	2.41256e-11	2.55638e-32
Il33	4.69402e-20	-0.485748	0.054	0.386	9.00031e-16	1.60073e-32	-0.487529	0.083	0.433	3.06924e-28	4.69402e-20	3.20147e-32
Fbxl7	1.46386e-20	-0.428789	0.337	0.667	2.80681e-16	2.34742e-32	-0.46274	0.472	0.734	4.50093e-28	1.46386e-20	4.69483e-32
App	1.48415e-21	0.521518	0.96	0.861	2.84572e-17	6.07434e-32	0.461205	0.95	0.884	1.16469e-27	1.48415e-21	1.21487e-31
Rgs3	7.45963e-32	0.528241	0.599	0.253	1.43031e-27	7.65789e-24	0.415175	0.587	0.337	1.46832e-19	7.65789e-24	1.49193e-31
Ren1	3.97793e-19	3.41789	0.228	0.055	7.62729e-15	8.82294e-32	3.5739	0.29	0.083	1.69171e-27	3.97793e-19	1.76459e-31
Efnb1	4.09788e-22	-0.347208	0.119	0.497	7.85728e-18	1.84077e-31	-0.377791	0.244	0.581	3.52948e-27	4.09788e-22	3.68153e-31
Gamt	6.83032e-25	0.455854	0.728	0.44	1.30965e-20	1.87277e-31	0.429845	0.762	0.518	3.59086e-27	6.83032e-25	3.74555e-31
Sema3a	5.29503e-25	-0.456253	0.069	0.467	1.01527e-20	1.90554e-31	-0.398018	0.139	0.489	3.65369e-27	5.29503e-25	3.81108e-31
Cfl1	5.44946e-18	0.308649	1	0.996	1.04488e-13	2.357e-31	0.279464	1	0.996	4.51931e-27	5.44946e-18	4.714e-31
Tmem119	3.22091e-16	-0.295513	0.045	0.329	6.17576e-12	4.19211e-31	-0.339247	0.066	0.418	8.03795e-27	3.22091e-16	8.38422e-31
Pdlim2	4.57262e-21	-0.4329	0.614	0.855	8.76754e-17	5.94171e-31	-0.488247	0.693	0.849	1.13926e-26	4.57262e-21	1.18834e-30
C1qtnf6	5.29279e-25	0.485037	0.649	0.349	1.01484e-20	9.61655e-31	0.367684	0.729	0.438	1.84388e-26	5.29279e-25	1.92331e-30
Tmem176a	7.86956e-24	-0.525094	0.401	0.718	1.50891e-19	1.35098e-30	-0.415184	0.485	0.758	2.59037e-26	7.86956e-24	2.70196e-30
Mmp2	5.46312e-18	-0.369006	0.262	0.605	1.0475e-13	1.67754e-30	-0.395092	0.37	0.685	3.21651e-26	5.46312e-18	3.35508e-30
Dock10	3.15687e-20	0.352678	0.381	0.137	6.05299e-16	2.11413e-30	0.294558	0.436	0.169	4.05364e-26	3.15687e-20	4.22827e-30
Fth1	6.36605e-15	-0.263471	1	1	1.22063e-10	2.45601e-30	-0.296373	1	0.999	4.70915e-26	6.36605e-15	4.91202e-30
Anxa1	1.65606e-21	0.554737	0.376	0.129	3.17532e-17	3.48967e-30	0.361581	0.399	0.148	6.69109e-26	1.65606e-21	6.97933e-30
Ednra	2.76853e-07	0.281296	0.54	0.384	0.00530837	3.93656e-30	0.342621	0.644	0.351	7.54795e-26	2.76853e-07	7.87311e-30
Id3	6.52409e-09	0.325592	0.99	0.965	0.000125093	4.39163e-30	0.434653	0.99	0.941	8.42051e-26	6.52409e-09	8.78326e-30
Gsta4	4.02521e-27	-0.526566	0.347	0.721	7.71794e-23	5.18801e-30	-0.41311	0.353	0.662	9.9475e-26	4.02521e-27	1.0376e-29
Pmepa1	3.41782e-15	0.533321	0.772	0.603	6.55332e-11	1.01287e-29	0.444074	0.868	0.654	1.94208e-25	3.41782e-15	2.02574e-29
Lum	1.6029e-12	-0.84891	0.025	0.242	3.07339e-08	1.50961e-29	-1.15539	0.046	0.371	2.89454e-25	1.6029e-12	3.01923e-29
Hoxb2	2.03616e-11	0.271914	0.475	0.278	3.90412e-07	1.53422e-29	0.315902	0.581	0.299	2.94172e-25	2.03616e-11	3.06845e-29
Psmd10	2.73666e-22	0.399197	0.653	0.382	5.24726e-18	2.04445e-29	0.321	0.657	0.399	3.92002e-25	2.73666e-22	4.08889e-29
Tns1	1.0917e-21	0.370469	0.668	0.384	2.09322e-17	2.41031e-29	0.345947	0.696	0.39	4.62152e-25	1.0917e-21	4.82061e-29
Rrbp1	1.86816e-19	-0.427518	0.837	0.95	3.582e-15	3.02323e-29	-0.418906	0.924	0.972	5.79673e-25	1.86816e-19	6.04645e-29
Ly6h	1.35434e-15	-0.351171	0.045	0.316	2.59681e-11	3.21407e-29	-0.457036	0.04	0.362	6.16266e-25	1.35434e-15	6.42815e-29
Myo1b	2.16045e-25	0.480765	0.837	0.597	4.14244e-21	4.13735e-29	0.351491	0.838	0.573	7.93296e-25	2.16045e-25	8.2747e-29
Cdk2ap2	2.26635e-26	0.391005	0.53	0.218	4.34551e-22	4.403e-29	0.314493	0.591	0.294	8.44231e-25	2.26635e-26	8.806e-29
Rgs2	6.12367e-29	0.53679	0.396	0.105	1.17415e-24	5.31747e-23	0.298718	0.35	0.134	1.01957e-18	5.31747e-23	1.22473e-28
Nr2f1	1.86548e-26	0.57365	0.708	0.398	3.57686e-22	7.4728e-29	0.463074	0.772	0.55	1.43283e-24	1.86548e-26	1.49456e-28
Tgfb2	1.53536e-28	0.541523	0.653	0.328	2.94389e-24	8.87439e-21	0.338119	0.63	0.388	1.70158e-16	8.87439e-21	3.07071e-28
Sfrp2	2.66438e-28	0.975388	0.545	0.212	5.10869e-24	3.95146e-22	0.65576	0.538	0.288	7.57654e-18	3.95146e-22	5.32877e-28
Rcn3	3.47114e-23	-0.42338	0.851	0.944	6.65557e-19	3.44011e-28	-0.371655	0.904	0.97	6.59607e-24	3.47114e-23	6.88022e-28
Il13ra1	7.8502e-16	0.256319	0.238	0.069	1.5052e-11	3.45304e-28	0.287095	0.281	0.083	6.62087e-24	7.8502e-16	6.90609e-28
Mprip	9.84599e-13	0.321398	0.886	0.798	1.88787e-08	4.03663e-28	0.356167	0.931	0.797	7.73983e-24	9.84599e-13	8.07325e-28
Ckb	1.96575e-13	-0.688525	0.351	0.615	3.76913e-09	6.9335e-28	-0.722899	0.337	0.634	1.32943e-23	1.96575e-13	1.3867e-27
Cpxm1	2.21847e-21	-0.414002	0.233	0.61	4.25369e-17	7.22065e-28	-0.409368	0.393	0.671	1.38449e-23	2.21847e-21	1.44413e-27
Dnaja1	1.89217e-13	0.269874	0.965	0.966	3.62805e-09	7.55345e-28	0.307915	0.997	0.981	1.4483e-23	1.89217e-13	1.51069e-27
Agrn	8.53081e-14	0.266561	0.455	0.235	1.6357e-09	9.93564e-28	0.251319	0.482	0.216	1.90506e-23	8.53081e-14	1.98713e-27
Zfp503	5.30735e-17	-0.41787	0.386	0.689	1.01763e-12	1.10895e-27	-0.427813	0.492	0.746	2.1263e-23	5.30735e-17	2.2179e-27
Col6a3	2.66681e-16	-0.371266	0.322	0.668	5.11333e-12	1.11287e-27	-0.430246	0.37	0.69	2.13383e-23	2.66681e-16	2.22575e-27
Unc5c	7.97026e-16	-0.288718	0.054	0.343	1.52822e-11	1.39101e-27	-0.327076	0.116	0.439	2.66712e-23	7.97026e-16	2.78202e-27
Akap12	1.41796e-27	-0.659042	0.639	0.901	2.7188e-23	1.35589e-26	-0.539549	0.766	0.885	2.59978e-22	1.35589e-26	2.83592e-27
Id2	1.48079e-27	-0.662412	0.5	0.828	2.83926e-23	1.14141e-25	-0.524751	0.535	0.764	2.18855e-21	1.14141e-25	2.96158e-27
Tmem176b	4.27518e-20	-0.467638	0.495	0.785	8.19723e-16	1.59646e-27	-0.400572	0.63	0.843	3.06105e-23	4.27518e-20	3.19291e-27
Pdgfra	2.93894e-16	-0.359691	0.391	0.729	5.63512e-12	1.88621e-27	-0.431569	0.525	0.814	3.61662e-23	2.93894e-16	3.77242e-27
Gpc6	1.43172e-18	0.443694	0.812	0.604	2.74517e-14	1.94398e-27	0.442052	0.815	0.56	3.72739e-23	1.43172e-18	3.88797e-27
Dab2	4.71809e-20	-0.334752	0.099	0.444	9.04647e-16	2.07897e-27	-0.322564	0.142	0.464	3.98622e-23	4.71809e-20	4.15794e-27
Lgi2	1.64955e-14	-0.332608	0.059	0.321	3.16285e-10	2.40858e-27	-0.401769	0.073	0.38	4.61822e-23	1.64955e-14	4.81717e-27
Eif4e3	2.58649e-13	0.265468	0.505	0.281	4.95933e-09	4.40926e-27	0.25961	0.587	0.301	8.45432e-23	2.58649e-13	8.81853e-27
Robo2	9.33645e-20	-0.377567	0.059	0.39	1.79017e-15	4.98151e-27	-0.309781	0.089	0.405	9.55155e-23	9.33645e-20	9.96302e-27
Ift43	1.05165e-17	0.335786	0.733	0.526	2.01643e-13	6.16468e-27	0.338271	0.789	0.583	1.18202e-22	1.05165e-17	1.23294e-26
Gjc1	1.80694e-20	0.507169	0.832	0.675	3.46463e-16	1.56772e-26	0.478518	0.881	0.712	3.00594e-22	1.80694e-20	3.13543e-26
Fxyd6	1.44314e-16	-0.369956	0.282	0.598	2.76709e-12	2.31357e-26	-0.371978	0.37	0.642	4.43605e-22	1.44314e-16	4.62715e-26
Mdk	2.46154e-26	-0.390091	0.95	0.99	4.71976e-22	1.97945e-25	-0.272464	0.99	0.991	3.79539e-21	1.97945e-25	4.92308e-26
Cxxc5	7.11876e-11	0.277311	0.515	0.316	1.36495e-06	2.77465e-26	0.328308	0.607	0.343	5.32011e-22	7.11876e-11	5.5493e-26
Isoc1	2.79235e-26	-0.447844	0.307	0.677	5.35405e-22	2.13694e-24	-0.326841	0.429	0.682	4.09738e-20	2.13694e-24	5.58469e-26
Ets1	1.4049e-18	0.462886	0.718	0.463	2.69375e-14	4.5316e-26	0.352714	0.759	0.488	8.68889e-22	1.4049e-18	9.0632e-26
Uba2	2.42515e-09	0.449726	0.772	0.727	4.64998e-05	4.82539e-26	0.473383	0.845	0.769	9.2522e-22	2.42515e-09	9.65078e-26
Crim1	5.63757e-26	0.374893	0.485	0.177	1.08095e-21	1.69506e-20	0.298835	0.409	0.194	3.25011e-16	1.69506e-20	1.12751e-25
Arhgap42	3.72377e-17	0.300845	0.53	0.268	7.13996e-13	6.18874e-26	0.309526	0.548	0.277	1.18663e-21	3.72377e-17	1.23775e-25
Fhl2	1.07682e-09	0.265438	0.911	0.821	2.0647e-05	6.63705e-26	0.404668	0.924	0.753	1.27259e-21	1.07682e-09	1.32741e-25
Ramp2	6.71616e-26	-0.522279	0.317	0.697	1.28776e-21	1.75438e-18	-0.331592	0.498	0.716	3.36386e-14	1.75438e-18	1.34323e-25
Gria4	7.17627e-26	-0.440904	0.094	0.483	1.37598e-21	3.18438e-24	-0.266814	0.109	0.415	6.10572e-20	3.18438e-24	1.43525e-25
Gadd45b	9.42235e-14	0.400942	0.322	0.13	1.80664e-09	8.54286e-26	0.540665	0.38	0.155	1.63801e-21	9.42235e-14	1.70857e-25
Ank3	1.05206e-25	-0.468093	0.089	0.497	2.01721e-21	3.80516e-23	-0.291839	0.145	0.439	7.29602e-19	3.80516e-23	2.10411e-25
Pja1	6.04609e-16	-0.31085	0.436	0.722	1.15928e-11	1.2995e-25	-0.355056	0.551	0.766	2.49166e-21	6.04609e-16	2.599e-25
2022-09-07	3.59922e-14	0.259188	1	0.981	6.90115e-10	1.30674e-25	0.310919	0.997	0.986	2.50554e-21	3.59922e-14	2.61347e-25
Lox	5.03484e-19	-0.569181	0.079	0.406	9.6538e-15	1.62984e-25	-0.504074	0.096	0.404	3.12505e-21	5.03484e-19	3.25967e-25
Ralgps2	5.41202e-18	-0.342248	0.168	0.487	1.0377e-13	1.68398e-25	-0.329714	0.277	0.559	3.22886e-21	5.41202e-18	3.36795e-25
Cldn11	3.51036e-20	-0.569852	0.015	0.338	6.73076e-16	2.04797e-25	-0.533391	0.033	0.32	3.92677e-21	3.51036e-20	4.09594e-25
Auts2	3.17651e-20	-0.405528	0.53	0.801	6.09064e-16	3.79607e-25	-0.370225	0.7	0.85	7.27859e-21	3.17651e-20	7.59215e-25
Igfbp3	4.75147e-24	-0.76581	0.069	0.443	9.11046e-20	3.89338e-25	-0.738464	0.182	0.467	7.46517e-21	4.75147e-24	7.78676e-25
Gdf11	6.76137e-18	0.286474	0.391	0.157	1.29642e-13	3.90982e-25	0.250711	0.439	0.192	7.49669e-21	6.76137e-18	7.81964e-25
Ehd2	3.94674e-25	0.420735	0.545	0.238	7.56748e-21	1.41333e-16	0.265494	0.558	0.344	2.70992e-12	1.41333e-16	7.89348e-25
Csnk1e	1.2414e-17	0.366714	0.767	0.567	2.38027e-13	4.0665e-25	0.363155	0.818	0.633	7.7971e-21	1.2414e-17	8.13299e-25
Pdia6	4.4846e-25	-0.41668	0.871	0.972	8.59878e-21	8.31734e-24	-0.282343	0.977	0.989	1.59477e-19	8.31734e-24	8.96921e-25
Foxd1	1.56747e-19	-0.666981	0.099	0.423	3.00547e-15	8.69899e-25	-0.703336	0.162	0.454	1.66794e-20	1.56747e-19	1.7398e-24
Hoxa10	9.78585e-25	-0.546664	0.545	0.804	1.87634e-20	4.85221e-20	-0.394056	0.591	0.754	9.30362e-16	4.85221e-20	1.95717e-24
Col18a1	1.4824e-10	0.25848	0.376	0.197	2.84236e-06	1.21128e-24	0.382163	0.455	0.202	2.3225e-20	1.4824e-10	2.42256e-24
Tcim	1.93386e-12	0.458825	0.634	0.45	3.70798e-08	1.68777e-24	0.353748	0.68	0.423	3.23613e-20	1.93386e-12	3.37554e-24
Hsp90b1	3.02736e-19	-0.526894	0.931	0.985	5.80466e-15	2.31529e-24	-0.506224	0.99	0.993	4.43933e-20	3.02736e-19	4.63057e-24
Negr1	4.21639e-23	-0.509055	0.015	0.375	8.0845e-19	2.38656e-24	-0.353225	0.063	0.345	4.576e-20	4.21639e-23	4.77313e-24
Tgfbi	2.6506e-24	-0.523167	0.376	0.742	5.08226e-20	1.824e-20	-0.374838	0.498	0.729	3.49735e-16	1.824e-20	5.3012e-24
Map1lc3b	2.33045e-12	0.309353	0.96	0.888	4.46841e-08	7.18787e-24	0.26548	0.977	0.909	1.3782e-19	2.33045e-12	1.43757e-23
Nfib	1.21222e-11	-0.355942	0.455	0.679	2.32431e-07	1.2978e-23	-0.45982	0.601	0.782	2.48841e-19	1.21222e-11	2.59561e-23
Eid1	7.74343e-12	-0.266189	0.866	0.953	1.48472e-07	1.36449e-23	-0.293261	0.927	0.969	2.61628e-19	7.74343e-12	2.72899e-23
Socs2	7.16563e-17	-0.310219	0.208	0.54	1.37394e-12	1.40101e-23	-0.316013	0.261	0.537	2.6863e-19	7.16563e-17	2.80203e-23
Bmp4	1.65709e-15	-0.391351	0.144	0.428	3.1773e-11	1.90117e-23	-0.394903	0.172	0.45	3.64531e-19	1.65709e-15	3.80234e-23
Hip1	2.50734e-15	0.370745	0.634	0.413	4.80757e-11	2.00729e-23	0.298302	0.663	0.414	3.84878e-19	2.50734e-15	4.01458e-23
Tmed3	5.893e-15	-0.324397	0.465	0.709	1.12992e-10	2.53832e-23	-0.384071	0.515	0.738	4.86697e-19	5.893e-15	5.07664e-23
Cntfr	2.63954e-14	-0.250159	0.079	0.356	5.06106e-10	3.02005e-23	-0.262366	0.096	0.378	5.79065e-19	2.63954e-14	6.0401e-23
Serpinb1a	2.3402e-12	0.304607	0.292	0.119	4.48709e-08	3.33288e-23	0.279127	0.383	0.16	6.39046e-19	2.3402e-12	6.66576e-23
Pir	3.90365e-15	0.346447	0.465	0.24	7.48485e-11	4.14563e-23	0.328519	0.502	0.262	7.94882e-19	3.90365e-15	8.29125e-23
Msn	2.6551e-15	0.336976	0.653	0.472	5.09089e-11	5.70173e-23	0.303468	0.713	0.481	1.09325e-18	2.6551e-15	1.14035e-22
Pid1	6.18487e-23	-0.49621	0.193	0.561	1.18589e-18	1.09041e-17	-0.33279	0.294	0.535	2.09075e-13	1.09041e-17	1.23697e-22
Ptgis	2.93244e-15	-0.381694	0.312	0.589	5.62266e-11	6.88748e-23	-0.310441	0.294	0.591	1.3206e-18	2.93244e-15	1.3775e-22
Tspan4	1.56357e-12	-0.309784	0.396	0.639	2.99798e-08	9.39985e-23	-0.35366	0.452	0.674	1.80233e-18	1.56357e-12	1.87997e-22
Arpc5	1.4536e-16	0.354291	0.851	0.761	2.78713e-12	1.04076e-22	0.306288	0.934	0.808	1.99556e-18	1.4536e-16	2.08153e-22
Cdkn1c	1.48815e-08	-0.899385	0.955	0.977	0.000285338	1.08668e-22	-1.05165	0.987	0.992	2.08361e-18	1.48815e-08	2.17337e-22
Arl4a	3.47004e-14	-0.476084	0.302	0.582	6.65346e-10	1.32295e-22	-0.455184	0.34	0.583	2.53663e-18	3.47004e-14	2.64591e-22
Fzd1	3.5547e-13	-0.313793	0.376	0.63	6.81578e-09	2.18892e-22	-0.343031	0.356	0.609	4.19703e-18	3.5547e-13	4.37783e-22
C1qtnf2	8.28637e-10	-0.251756	0.079	0.276	1.58883e-05	2.59732e-22	-0.325943	0.102	0.384	4.98011e-18	8.28637e-10	5.19465e-22
Sct	4.4857e-16	-0.358869	0.03	0.3	8.60088e-12	2.60861e-22	-0.289586	0.013	0.27	5.00175e-18	4.4857e-16	5.21722e-22
Ptprd	1.29974e-13	-0.354803	0.406	0.626	2.49212e-09	2.8875e-22	-0.328869	0.442	0.682	5.53649e-18	1.29974e-13	5.77499e-22
Nkd1	4.18811e-22	-0.530417	0.203	0.575	8.03028e-18	2.20947e-21	-0.408559	0.31	0.559	4.23643e-17	2.20947e-21	8.37622e-22
Gpx7	3.01521e-09	-0.278143	0.366	0.563	5.78137e-05	5.03107e-22	-0.374381	0.469	0.685	9.64657e-18	3.01521e-09	1.00621e-21
Cox6b2	4.66223e-12	-0.27847	0.302	0.56	8.93936e-08	5.69337e-22	-0.306007	0.281	0.551	1.09165e-17	4.66223e-12	1.13867e-21
Mmp23	3.3774e-13	-0.310919	0.114	0.373	6.47583e-09	6.84236e-22	-0.354573	0.155	0.434	1.31195e-17	3.3774e-13	1.36847e-21
Frmd4a	7.65026e-22	0.321891	0.604	0.295	1.46686e-17	3.43955e-18	0.258625	0.581	0.346	6.595e-14	3.43955e-18	1.53005e-21
Csk	1.02259e-13	0.30246	0.614	0.416	1.96072e-09	9.54525e-22	0.266537	0.683	0.452	1.83021e-17	1.02259e-13	1.90905e-21
Fkbp7	7.93587e-14	-0.287709	0.302	0.58	1.52162e-09	9.82964e-22	-0.317543	0.403	0.659	1.88474e-17	7.93587e-14	1.96593e-21
Gata6	3.11101e-17	-0.36474	0.129	0.439	5.96506e-13	1.51296e-21	-0.365306	0.228	0.489	2.90096e-17	3.11101e-17	3.02593e-21
Ubr1	6.77361e-16	0.333753	0.505	0.275	1.29877e-11	1.86881e-21	0.256755	0.528	0.281	3.58326e-17	6.77361e-16	3.73762e-21
Pls3	2.86783e-12	0.337297	0.639	0.463	5.49877e-08	2.25342e-21	0.325853	0.739	0.529	4.32072e-17	2.86783e-12	4.50685e-21
Amotl1	5.50357e-14	0.354143	0.663	0.47	1.05525e-09	2.48114e-21	0.27831	0.723	0.517	4.75735e-17	5.50357e-14	4.96229e-21
Arpc2	5.85856e-14	0.316753	0.97	0.935	1.12332e-09	2.93903e-21	0.252036	0.983	0.963	5.6353e-17	5.85856e-14	5.87806e-21
Vcam1	2.00049e-15	-0.462415	0.084	0.37	3.83573e-11	4.22559e-21	-0.36968	0.096	0.364	8.10215e-17	2.00049e-15	8.45118e-21
Gstm2	3.74115e-18	-0.395399	0.218	0.537	7.17327e-14	5.03699e-21	-0.344612	0.304	0.571	9.65792e-17	3.74115e-18	1.0074e-20
Ptk7	8.21581e-12	-0.261687	0.257	0.503	1.5753e-07	6.89566e-21	-0.274666	0.337	0.584	1.32217e-16	8.21581e-12	1.37913e-20
Ier2	2.84311e-13	0.469171	0.906	0.747	5.45139e-09	8.04495e-21	0.414456	0.871	0.73	1.54254e-16	2.84311e-13	1.60899e-20
Cav1	2.42562e-15	0.352637	0.267	0.084	4.65089e-11	8.0984e-21	0.2623	0.31	0.114	1.55279e-16	2.42562e-15	1.61968e-20
H2afy2	4.4319e-15	-0.314179	0.55	0.781	8.49772e-11	8.56987e-21	-0.31051	0.66	0.818	1.64319e-16	4.4319e-15	1.71397e-20
Mfap5	6.21e-13	-0.615356	0.03	0.257	1.1907e-08	1.44078e-20	-0.785168	0.053	0.299	2.76255e-16	6.21e-13	2.88156e-20
Fscn1	1.87087e-20	-0.386591	0.347	0.656	3.5872e-16	2.42162e-20	-0.310725	0.508	0.72	4.6432e-16	2.42162e-20	3.74173e-20
Vcl	1.01226e-15	0.410912	0.688	0.438	1.9409e-11	1.92322e-20	0.315387	0.69	0.452	3.68758e-16	1.01226e-15	3.84644e-20
Plekhg2	5.11379e-16	0.285365	0.584	0.334	9.80518e-12	2.42888e-20	0.253136	0.673	0.431	4.65713e-16	5.11379e-16	4.85775e-20
Dact3	6.64996e-14	-0.267824	0.238	0.53	1.27506e-09	2.58225e-20	-0.252432	0.274	0.538	4.9512e-16	6.64996e-14	5.16449e-20
Smoc2	5.1438e-10	-0.448443	0.015	0.188	9.86272e-06	2.58632e-20	-0.579364	0.036	0.276	4.95902e-16	5.1438e-10	5.17265e-20
Pafah1b3	5.29039e-11	-0.256431	0.658	0.844	1.01438e-06	2.80151e-20	-0.286826	0.766	0.874	5.37161e-16	5.29039e-11	5.60301e-20
Kctd12	1.49657e-13	-0.326462	0.054	0.3	2.86952e-09	3.10746e-20	-0.328994	0.076	0.327	5.95825e-16	1.49657e-13	6.21492e-20
Pop5	1.99002e-10	0.259414	0.589	0.407	3.81566e-06	3.14928e-20	0.265363	0.66	0.456	6.03844e-16	1.99002e-10	6.29857e-20
Col15a1	3.17855e-17	-0.595809	0.03	0.316	6.09456e-13	3.33715e-20	-0.515934	0.076	0.325	6.39864e-16	3.17855e-17	6.67429e-20
Pdcd4	1.80038e-12	-0.315491	0.644	0.841	3.45205e-08	3.60079e-20	-0.318801	0.726	0.863	6.90416e-16	1.80038e-12	7.20158e-20
Lmo4	6.72349e-12	-0.309187	0.431	0.664	1.28916e-07	5.10643e-20	-0.324942	0.505	0.706	9.79107e-16	6.72349e-12	1.02129e-19
Hes1	9.06353e-19	0.501247	0.723	0.459	1.73784e-14	5.38125e-20	0.378973	0.686	0.464	1.0318e-15	9.06353e-19	1.07625e-19
Meis2	6.21877e-20	-0.428439	0.911	0.959	1.19239e-15	7.39335e-17	-0.314211	0.934	0.937	1.4176e-12	7.39335e-17	1.24375e-19
Fam213a	8.49509e-16	-0.328137	0.089	0.388	1.62885e-11	6.64629e-20	-0.331796	0.152	0.408	1.27436e-15	8.49509e-16	1.32926e-19
Phgdh	0.000654945	0.326485	0.49	0.411	1	7.14928e-20	0.493779	0.66	0.479	1.3708e-15	0.000654945	1.42986e-19
Arglu1	5.23603e-11	0.303191	0.926	0.895	1.00396e-06	1.08363e-19	0.282928	0.957	0.903	2.07774e-15	5.23603e-11	2.16725e-19
Itgb5	2.85427e-10	0.261531	0.579	0.378	5.47277e-06	1.33291e-19	0.262515	0.703	0.444	2.55572e-15	2.85427e-10	2.66582e-19
Dhrs3	1.69466e-19	-0.419921	0.342	0.657	3.24934e-15	1.6707e-16	-0.324574	0.353	0.569	3.2034e-12	1.6707e-16	3.38932e-19
Maml3	3.95409e-11	0.309638	0.48	0.293	7.58158e-07	2.14107e-19	0.294002	0.545	0.316	4.10528e-15	3.95409e-11	4.28213e-19
Itgb1	2.1899e-19	0.403078	0.985	0.965	4.19892e-15	3.82109e-19	0.253987	0.987	0.974	7.32655e-15	3.82109e-19	4.37981e-19
Pde3a	1.64214e-08	0.267538	0.634	0.48	0.000314864	2.40539e-19	0.312029	0.71	0.479	4.6121e-15	1.64214e-08	4.81079e-19
Isyna1	3.03228e-19	0.537219	0.812	0.594	5.81409e-15	2.86342e-16	0.382956	0.842	0.66	5.49032e-12	2.86342e-16	6.06456e-19
Ldhb	4.12562e-17	0.394865	0.911	0.807	7.91046e-13	3.64083e-19	0.307731	0.891	0.779	6.98092e-15	4.12562e-17	7.28166e-19
Gna11	5.22352e-10	0.264215	0.757	0.637	1.00156e-05	3.85048e-19	0.279231	0.858	0.698	7.3829e-15	5.22352e-10	7.70095e-19
Ktn1	2.81404e-12	0.311117	0.916	0.801	5.39565e-08	3.88955e-19	0.275921	0.917	0.836	7.45782e-15	2.81404e-12	7.77909e-19
Lmna	4.38686e-16	0.468433	0.822	0.62	8.41137e-12	4.24846e-19	0.332847	0.842	0.701	8.146e-15	4.38686e-16	8.49692e-19
Pkig	8.6538e-16	0.378977	0.767	0.609	1.65928e-11	5.16702e-19	0.30876	0.818	0.652	9.90725e-15	8.6538e-16	1.0334e-18
Igfbp5	6.26169e-19	0.853924	0.757	0.483	1.20062e-14	5.91072e-15	0.509074	0.766	0.531	1.13332e-10	5.91072e-15	1.25234e-18
Kdelr3	2.31989e-14	-0.301666	0.223	0.509	4.44816e-10	8.33899e-19	-0.331184	0.426	0.642	1.59892e-14	2.31989e-14	1.6678e-18
Nav1	2.94217e-14	-0.270521	0.084	0.353	5.64131e-10	9.44384e-19	-0.251527	0.139	0.388	1.81076e-14	2.94217e-14	1.88877e-18
Vkorc1	3.6688e-09	-0.250489	0.386	0.606	7.03457e-05	1.16699e-18	-0.285911	0.389	0.616	2.23758e-14	3.6688e-09	2.33397e-18
Cd47	1.91763e-17	-0.361619	0.277	0.597	3.67686e-13	1.28758e-18	-0.272403	0.353	0.591	2.46881e-14	1.91763e-17	2.57516e-18
Rgs7bp	2.12877e-06	0.294755	0.158	0.068	0.040817	1.47882e-18	0.362278	0.33	0.15	2.83549e-14	2.12877e-06	2.95764e-18
Tln1	2.02072e-16	0.320191	0.96	0.877	3.87453e-12	1.83767e-18	0.268266	0.95	0.893	3.52355e-14	2.02072e-16	3.67534e-18
Thbs2	9.6877e-15	-0.446484	0.025	0.275	1.85752e-10	2.02217e-18	-0.434321	0.073	0.303	3.8773e-14	9.6877e-15	4.04433e-18
Palld	5.11448e-13	-0.640932	0.223	0.47	9.8065e-09	2.12353e-18	-0.585588	0.284	0.515	4.07166e-14	5.11448e-13	4.24706e-18
Neto2	3.8035e-13	-0.363605	0.079	0.319	7.29284e-09	2.32861e-18	-0.28771	0.086	0.318	4.46488e-14	3.8035e-13	4.65723e-18
Emp1	2.45842e-18	-0.370807	0.168	0.5	4.71377e-14	8.70662e-16	-0.289956	0.343	0.563	1.66941e-11	8.70662e-16	4.91684e-18
Gstm5	2.59223e-18	-0.389151	0.545	0.817	4.97035e-14	1.73388e-16	-0.259105	0.673	0.823	3.32453e-12	1.73388e-16	5.18447e-18
Thbs1	8.33868e-16	-0.365053	0.069	0.35	1.59886e-11	2.83916e-18	-0.307439	0.089	0.332	5.44381e-14	8.33868e-16	5.67832e-18
Ptch1	7.18387e-16	-0.354835	0.139	0.43	1.37744e-11	3.49582e-18	-0.400445	0.261	0.493	6.70288e-14	7.18387e-16	6.99163e-18
Myl6	2.88451e-14	0.285532	1	1	5.53076e-10	3.98234e-18	0.265563	1	0.999	7.63574e-14	2.88451e-14	7.96468e-18
Loxl1	1.96813e-12	-0.324834	0.183	0.433	3.7737e-08	5.97345e-18	-0.284751	0.231	0.497	1.14535e-13	1.96813e-12	1.19469e-17
Cdc42ep5	1.03565e-13	-0.311908	0.317	0.61	1.98575e-09	6.38396e-18	-0.29676	0.439	0.657	1.22406e-13	1.03565e-13	1.27679e-17
Sdc2	2.98497e-17	-0.507358	0.386	0.674	5.72338e-13	7.71519e-18	-0.407589	0.452	0.633	1.47931e-13	2.98497e-17	1.54304e-17
Zfand5	9.16692e-11	0.2964	0.837	0.68	1.75766e-06	8.10928e-18	0.340214	0.861	0.725	1.55487e-13	9.16692e-11	1.62186e-17
Basp1	1.43163e-07	-0.322662	0.881	0.926	0.00274501	8.32669e-18	-0.456609	0.947	0.947	1.59656e-13	1.43163e-07	1.66534e-17
Spats2l	1.69821e-12	-0.321477	0.312	0.575	3.25615e-08	9.2607e-18	-0.327551	0.413	0.63	1.77565e-13	1.69821e-12	1.85214e-17
Pla2g4a	2.13483e-15	-0.406914	0.332	0.589	4.09333e-11	1.02473e-17	-0.367609	0.31	0.517	1.96482e-13	2.13483e-15	2.04947e-17
Sfr1	5.77375e-10	-0.251673	0.876	0.948	1.10706e-05	1.11717e-17	-0.268763	0.95	0.982	2.14206e-13	5.77375e-10	2.23434e-17
Trib2	3.74773e-10	0.350585	0.47	0.304	7.1859e-06	1.39513e-17	0.375285	0.561	0.367	2.67502e-13	3.74773e-10	2.79026e-17
Uqcrfs1	3.6917e-14	0.28246	0.871	0.773	7.07847e-10	1.60124e-17	0.261626	0.881	0.817	3.07021e-13	3.6917e-14	3.20248e-17
Trps1	3.8064e-12	-0.306741	0.079	0.309	7.2984e-08	2.15359e-17	-0.343968	0.102	0.332	4.12929e-13	3.8064e-12	4.30718e-17
Dclk1	4.58819e-12	-0.366142	0.05	0.271	8.7974e-08	3.19969e-17	-0.30845	0.069	0.299	6.1351e-13	4.58819e-12	6.39939e-17
Gas6	7.00594e-14	-0.555392	0.074	0.326	1.34332e-09	5.52156e-17	-0.512831	0.149	0.38	1.0587e-12	7.00594e-14	1.10431e-16
Lgalsl	2.72933e-16	0.371449	0.668	0.436	5.23322e-12	6.5131e-17	0.322045	0.64	0.436	1.24882e-12	2.72933e-16	1.30262e-16
Ppfibp1	7.7516e-17	0.367315	0.609	0.365	1.48629e-12	3.30062e-13	0.258055	0.597	0.417	6.32862e-09	3.30062e-13	1.55032e-16
Serpinf1	1.09627e-09	-0.257464	0.03	0.209	2.10198e-05	8.11824e-17	-0.44001	0.073	0.293	1.55659e-12	1.09627e-09	1.62365e-16
Nes	8.70592e-17	0.378471	0.584	0.34	1.66927e-12	3.48922e-12	0.257567	0.611	0.438	6.69022e-08	3.48922e-12	1.74118e-16
Cped1	1.71918e-13	-0.304046	0.139	0.402	3.29635e-09	9.20558e-17	-0.26792	0.228	0.461	1.76508e-12	1.71918e-13	1.84112e-16
Odc1	3.92469e-16	-0.385051	0.391	0.688	7.5252e-12	1.25581e-16	-0.315751	0.574	0.729	2.40789e-12	3.92469e-16	2.51162e-16
Selenom	2.69166e-08	-0.297526	0.891	0.953	0.000516098	1.34869e-16	-0.325407	0.941	0.96	2.58598e-12	2.69166e-08	2.69738e-16
Fgfr1	2.17168e-12	-0.294341	0.307	0.552	4.16399e-08	1.38925e-16	-0.250901	0.429	0.645	2.66375e-12	2.17168e-12	2.77851e-16
Igfbp2	5.94949e-15	-0.610167	0.114	0.399	1.14076e-10	1.3966e-16	-0.553147	0.162	0.389	2.67785e-12	5.94949e-15	2.79321e-16
Alx1	6.74397e-16	-0.44832	0.059	0.346	1.29309e-11	1.60276e-16	-0.345087	0.132	0.371	3.07312e-12	6.74397e-16	3.20551e-16
6330403K07Rik	3.25787e-15	-0.338898	0.267	0.577	6.24663e-11	1.74081e-16	-0.329741	0.446	0.646	3.33784e-12	3.25787e-15	3.48163e-16
Apoe	1.06179e-06	-0.422804	0.277	0.458	0.0203588	1.90744e-16	-0.468001	0.419	0.613	3.65733e-12	1.06179e-06	3.81488e-16
Tnfaip8	2.44661e-13	-0.305508	0.272	0.543	4.69114e-09	2.11031e-16	-0.289132	0.376	0.592	4.04631e-12	2.44661e-13	4.22063e-16
Aebp1	2.19275e-16	-0.370646	0.332	0.628	4.20438e-12	3.84176e-13	-0.26096	0.469	0.652	7.36619e-09	3.84176e-13	4.3855e-16
Plpp3	7.04897e-09	-0.347674	0.124	0.326	0.000135157	5.56608e-16	-0.491532	0.172	0.387	1.06724e-11	7.04897e-09	1.11322e-15
Fam162a	2.57821e-07	0.412431	0.901	0.855	0.00494346	1.06413e-15	0.369275	0.914	0.851	2.04037e-11	2.57821e-07	2.12827e-15
Junb	2.75294e-06	0.294155	0.871	0.8	0.052785	1.12491e-15	0.405327	0.851	0.73	2.1569e-11	2.75294e-06	2.24982e-15
Ogfrl1	1.28107e-15	-0.379136	0.153	0.44	2.45632e-11	1.68932e-14	-0.357193	0.277	0.461	3.2391e-10	1.68932e-14	2.56214e-15
Nav3	3.57838e-10	-0.273965	0.015	0.192	6.86119e-06	2.00338e-15	-0.297941	0.053	0.251	3.84129e-11	3.57838e-10	4.00677e-15
Dtx3	6.18508e-08	0.281587	0.678	0.524	0.00118593	3.21535e-15	0.264692	0.706	0.52	6.16511e-11	6.18508e-08	6.4307e-15
Tes	6.78121e-11	0.318585	0.45	0.26	1.30023e-06	3.27911e-15	0.314359	0.462	0.279	6.28736e-11	6.78121e-11	6.55821e-15
Clca3a1	1.04816e-13	-0.351314	0.04	0.284	2.00975e-09	7.08609e-15	-0.302674	0.083	0.293	1.35869e-10	1.04816e-13	1.41722e-14
Bok	4.28777e-13	-0.434053	0.297	0.565	8.22137e-09	9.1389e-15	-0.434259	0.469	0.599	1.75229e-10	4.28777e-13	1.82778e-14
Hoxd10	1.87579e-13	-0.300738	0.163	0.436	3.59663e-09	1.01126e-14	-0.263136	0.254	0.467	1.939e-10	1.87579e-13	2.02253e-14
Aldh1a2	6.06469e-14	-0.558339	0.282	0.53	1.16284e-09	8.33929e-09	-0.480502	0.449	0.541	0.000159898	8.33929e-09	1.21294e-13
Dpysl3	3.97969e-09	-0.254705	0.252	0.485	7.63066e-05	8.12776e-14	-0.283842	0.327	0.538	1.55842e-09	3.97969e-09	1.62555e-13
Fbn1	1.81918e-11	-0.302866	0.381	0.644	3.48809e-07	8.94007e-14	-0.35759	0.551	0.705	1.71417e-09	1.81918e-11	1.78801e-13
Ecm1	1.11829e-13	-0.492699	0.589	0.75	2.14421e-09	0.00025118	-0.260335	0.64	0.654	1	0.00025118	2.23659e-13
Cenpa	4.01039e-11	0.373981	0.584	0.35	7.68953e-07	1.32335e-13	0.307389	0.637	0.412	2.5374e-09	4.01039e-11	2.64671e-13
Nfia	3.25941e-09	-0.264461	0.525	0.721	6.2496e-05	2.03872e-13	-0.261062	0.611	0.773	3.90905e-09	3.25941e-09	4.07745e-13
Cxcl12	1.07838e-12	-0.62381	0.233	0.49	2.06768e-08	2.65291e-13	-0.491666	0.363	0.557	5.0867e-09	1.07838e-12	5.30583e-13
Uaca	5.3161e-13	0.343003	0.446	0.242	1.01931e-08	5.10197e-13	0.293918	0.422	0.262	9.78251e-09	5.3161e-13	1.02039e-12
Bambi	1.6368e-10	-0.266229	0.114	0.334	3.1384e-06	6.81115e-13	-0.252482	0.191	0.39	1.30597e-08	1.6368e-10	1.36223e-12
Igfbp6	4.43982e-06	-0.275487	0.015	0.122	0.0851291	1.93044e-12	-0.378549	0.02	0.175	3.70143e-08	4.43982e-06	3.86088e-12
Sema3c	2.80095e-12	-0.37699	0.054	0.282	5.37054e-08	2.01252e-12	-0.320299	0.099	0.279	3.85881e-08	2.80095e-12	4.02504e-12
Rock2	5.64762e-09	0.261597	0.837	0.705	0.000108287	2.27537e-12	0.251977	0.842	0.722	4.36279e-08	5.64762e-09	4.55074e-12
Tnnt1	4.19936e-12	-0.313378	0.233	0.48	8.05186e-08	3.4067e-11	-0.259605	0.287	0.46	6.532e-07	3.4067e-11	8.39873e-12
Atp2b1	7.47777e-10	-0.496651	0.772	0.875	1.43379e-05	1.33629e-11	-0.392652	0.891	0.894	2.5622e-07	7.47777e-10	2.67258e-11
Ccnd2	1.95031e-08	-0.317615	0.861	0.903	0.000373952	1.51355e-11	-0.297175	0.914	0.913	2.90207e-07	1.95031e-08	3.02709e-11
Dkk1	1.55506e-11	-0.665165	0.074	0.291	2.98168e-07	0.00016992	-0.276516	0.149	0.246	1	0.00016992	3.11012e-11
Pdlim3	6.2607e-11	-0.479991	0.104	0.322	1.20043e-06	1.32753e-08	-0.333448	0.119	0.262	0.000254541	1.32753e-08	1.25214e-10
Id4	7.75439e-11	-0.460027	0.114	0.332	1.48683e-06	1.12286e-09	-0.25111	0.122	0.281	2.15298e-05	1.12286e-09	1.55088e-10
Col23a1	8.98855e-09	-0.269943	0.054	0.229	0.000172347	1.17206e-10	-0.29697	0.096	0.254	2.24731e-06	8.98855e-09	2.34412e-10
Stbd1	0.0347318	0.255041	0.376	0.358	1	4.24492e-10	0.314359	0.492	0.36	8.13921e-06	0.0347318	8.48984e-10
Tmsb4x	6.79143e-05	-0.309622	1	0.999	1	1.0598e-09	-0.403208	1	1	2.03206e-05	6.79143e-05	2.1196e-09
Cavin2	2.25894e-09	-0.387079	0.035	0.206	4.3313e-05	2.33271e-08	-0.273566	0.063	0.187	0.000447273	2.33271e-08	4.51789e-09
Htatsf1	0.00102538	0.347274	0.609	0.53	1	2.18794e-08	0.35069	0.723	0.613	0.000419515	0.00102538	4.37587e-08
Fibin	1.87866e-05	-0.264631	0.223	0.367	0.360214	2.85674e-08	-0.310429	0.267	0.402	0.000547752	1.87866e-05	5.71348e-08
Pfn2	2.93432e-06	-0.548906	0.347	0.493	0.0562627	8.9032e-08	-0.498328	0.449	0.554	0.0017071	2.93432e-06	1.78064e-07
Itih5	1.68053e-07	-0.275494	0.129	0.3	0.00322225	8.58685e-05	-0.278113	0.231	0.319	1	8.58685e-05	3.36106e-07
Wnt4	2.30114e-07	-0.528764	0.054	0.206	0.00441221	6.571e-07	-0.336369	0.092	0.205	0.0125992	6.571e-07	4.60229e-07
Zeb2	3.25497e-07	-0.387882	0.911	0.85	0.00624108	3.44344e-06	-0.33913	0.937	0.815	0.0660245	3.44344e-06	6.50994e-07
Malat1	2.6129e-05	0.270992	1	1	0.500998	5.37408e-06	0.265901	1	1	0.103043	2.6129e-05	1.07481e-05
Nts	3.43782e-05	-0.886648	0.02	0.112	0.659167	0.0102487	-0.501383	0.069	0.115	1	0.0102487	6.87552e-05
Xist	5.54788e-05	-0.390249	0.342	0.479	1	0.00830928	-0.281364	0.347	0.4	1	0.00830928	0.000110954
Sparcl1	0.0002161	0.444965	0.634	0.59	1	0.00106686	0.259537	0.752	0.693	1	0.00106686	0.000432154
Dlk1	0.00163494	-0.38348	0.228	0.36	1	0.00408123	-0.929815	0.416	0.501	1	0.00408123	0.00326722
Postn	0.00642695	-0.656078	0.228	0.303	1	0.0117533	-0.689272	0.35	0.38	1	0.0117533	0.0128126
Mylk	0.852051	-0.387346	0.807	0.818	1	0.105351	-0.419662	0.832	0.814	1	0.852051	0.199604

## Sheet: Stroma_Subcluster.4.Mut.CTRL.m
Gene	CTRL_p_val	CTRL_avg_logFC	CTRL_pct.1	CTRL_pct.2	CTRL_p_val_adj	Mutant_p_val	Mutant_avg_logFC	Mutant_pct.1	Mutant_pct.2	Mutant_p_val_adj	max_pval	minimump_p_val
Ace2	2.01386e-56	0.976383	0.923	0.436	3.86138e-52	4.18848e-144	1.17345	0.967	0.413	8.03099e-140	2.01386e-56	8.37696e-144
Igfbp3	2.24356e-47	1.23885	0.786	0.343	4.3018e-43	1.95065e-123	1.3616	0.873	0.376	3.74017e-119	2.24356e-47	3.9013e-123
Fbln5	1.90009e-50	1.01249	0.917	0.572	3.64323e-46	1.83576e-115	1.10525	0.952	0.626	3.51989e-111	1.90009e-50	3.67153e-115
Lox	2.94507e-57	0.891048	0.833	0.303	5.64687e-53	1.04618e-113	0.861105	0.842	0.306	2.00595e-109	2.94507e-57	2.09237e-113
G0s2	3.34648e-55	1.27926	0.946	0.614	6.41655e-51	5.51513e-111	1.22689	0.915	0.533	1.05747e-106	3.34648e-55	1.10303e-110
Thbs2	1.07954e-54	0.839331	0.679	0.186	2.06991e-50	2.47988e-108	0.777076	0.742	0.215	4.75493e-104	1.07954e-54	4.95976e-108
Col14a1	2.22514e-47	0.873692	0.875	0.411	4.26649e-43	1.03269e-103	0.984466	0.936	0.493	1.98008e-99	2.22514e-47	2.06538e-103
Colec11	3.10367e-29	0.298699	0.179	0.015	5.95097e-25	1.7536e-103	0.535805	0.33	0.027	3.36235e-99	3.10367e-29	3.50719e-103
S100a11	6.16888e-37	0.565065	0.994	0.967	1.18282e-32	5.80928e-91	0.61279	0.994	0.978	1.11387e-86	6.16888e-37	1.16186e-90
Angpt2	2.36556e-19	0.52436	0.375	0.125	4.53572e-15	1.41589e-89	0.768648	0.542	0.124	2.71482e-85	2.36556e-19	2.83177e-89
Clca3a1	8.81342e-45	0.70622	0.643	0.202	1.68989e-40	5.29877e-89	0.783419	0.667	0.216	1.01599e-84	8.81342e-45	1.05975e-88
Bgn	1.41589e-39	0.74052	0.988	0.876	2.71482e-35	8.59719e-89	0.730672	0.988	0.914	1.64842e-84	1.41589e-39	1.71944e-88
Rap2a	5.68673e-30	0.622971	0.798	0.456	1.09037e-25	1.41158e-88	0.740786	0.888	0.512	2.70656e-84	5.68673e-30	2.82316e-88
Nrp2	3.7678e-23	0.520442	0.405	0.132	7.22439e-19	2.28907e-87	0.688117	0.6	0.162	4.38907e-83	3.7678e-23	4.57814e-87
Sparc	8.64414e-40	0.70222	1	0.986	1.65743e-35	5.88356e-87	0.794844	1	0.996	1.12811e-82	8.64414e-40	1.17671e-86
Vegfd	1.01905e-37	0.716442	0.72	0.321	1.95392e-33	5.55813e-83	0.643195	0.748	0.295	1.06572e-78	1.01905e-37	1.11163e-82
Gapdh	1.1214e-28	-0.424413	1	0.998	2.15018e-24	5.72347e-81	-0.561603	0.976	0.995	1.09742e-76	1.1214e-28	1.14469e-80
2022-09-07	1.80208e-36	0.587825	1	0.981	3.4553e-32	4.72011e-79	0.564935	1	0.985	9.05033e-75	1.80208e-36	9.44021e-79
S100a10	6.75886e-29	0.557254	0.982	0.89	1.29594e-24	1.32748e-78	0.647425	0.997	0.921	2.54531e-74	6.75886e-29	2.65496e-78
Kcnk2	7.68388e-31	0.439056	0.333	0.065	1.47331e-26	1.00508e-76	0.498936	0.421	0.081	1.92713e-72	7.68388e-31	2.01015e-76
Vcam1	1.04236e-29	0.695733	0.649	0.292	1.99863e-25	1.22664e-76	0.660438	0.715	0.283	2.35195e-72	1.04236e-29	2.45327e-76
Tmsb10	4.51139e-27	0.356405	1	0.999	8.65014e-23	3.07445e-75	0.445497	1	0.999	5.89496e-71	4.51139e-27	6.14891e-75
Col1a2	8.18795e-32	0.65719	1	0.97	1.56996e-27	3.99213e-75	0.801285	1	0.981	7.65451e-71	8.18795e-32	7.98426e-75
Dpep1	2.3338e-44	0.537843	0.399	0.065	4.47483e-40	4.73591e-75	0.493795	0.445	0.095	9.08063e-71	2.3338e-44	9.47182e-75
Mif	1.28497e-25	-0.509387	0.94	0.977	2.4638e-21	1.28431e-74	-0.712998	0.927	0.977	2.46253e-70	1.28497e-25	2.56861e-74
Fhl1	3.07263e-23	0.450279	0.375	0.111	5.89146e-19	3.44735e-74	0.58654	0.485	0.118	6.60995e-70	3.07263e-23	6.8947e-74
Nid1	2.22197e-30	0.569361	0.923	0.743	4.2604e-26	9.12839e-73	0.660631	0.945	0.784	1.75028e-68	2.22197e-30	1.82568e-72
Zeb2	5.02043e-36	0.59825	0.994	0.841	9.62616e-32	3.74922e-72	0.687718	0.988	0.807	7.18876e-68	5.02043e-36	7.49845e-72
Maf	4.9549e-28	0.594188	0.577	0.222	9.50052e-24	7.01103e-72	0.605108	0.718	0.281	1.34429e-67	4.9549e-28	1.40221e-71
Col3a1	1.75966e-30	0.673246	1	0.935	3.37397e-26	1.09981e-71	0.75349	1	0.965	2.10877e-67	1.75966e-30	2.19962e-71
Penk	4.58381e-26	-1.39156	0.262	0.675	8.78901e-22	7.3722e-71	-1.7167	0.176	0.684	1.41355e-66	4.58381e-26	1.47444e-70
Anxa2	7.82888e-26	0.457409	0.988	0.972	1.50111e-21	1.87607e-70	0.524524	0.994	0.977	3.59718e-66	7.82888e-26	3.75214e-70
Tshz2	6.09192e-30	0.759319	0.976	0.814	1.16807e-25	2.06241e-69	0.743234	0.982	0.875	3.95446e-65	6.09192e-30	4.12481e-69
Vstm4	8.44869e-30	0.608311	0.815	0.525	1.61995e-25	2.37802e-69	0.629736	0.876	0.561	4.55962e-65	8.44869e-30	4.75604e-69
Col4a2	4.1766e-18	0.434633	0.929	0.775	8.00821e-14	1.85525e-68	0.688065	0.967	0.772	3.55726e-64	4.1766e-18	3.7105e-68
Pmp22	1.15607e-26	0.574673	0.815	0.542	2.21666e-22	5.02478e-68	0.633678	0.9	0.601	9.63451e-64	1.15607e-26	1.00496e-67
Col4a1	2.30136e-13	0.440428	0.982	0.871	4.41263e-09	7.27882e-68	0.735161	1	0.868	1.39564e-63	2.30136e-13	1.45576e-67
Ifitm1	1.47949e-26	0.592047	0.958	0.821	2.83677e-22	5.67269e-66	0.742491	0.961	0.782	1.08768e-61	1.47949e-26	1.13454e-65
H2afz	1.21645e-28	-0.842921	0.982	0.992	2.33243e-24	2.43597e-65	-1.00239	0.973	0.993	4.67074e-61	1.21645e-28	4.87195e-65
Cald1	8.94559e-27	0.377173	1	0.994	1.71523e-22	3.42254e-63	0.463941	1	0.989	6.56237e-59	8.94559e-27	6.84507e-63
Col1a1	1.46568e-22	0.668985	0.988	0.905	2.8103e-18	8.60162e-63	0.827563	1	0.937	1.64928e-58	1.46568e-22	1.72032e-62
Il33	1.28119e-24	0.585083	0.625	0.305	2.45656e-20	1.27279e-62	0.641187	0.727	0.349	2.44044e-58	1.28119e-24	2.54557e-62
Cpe	8.54729e-15	0.487635	0.536	0.291	1.63886e-10	4.38037e-62	0.664053	0.724	0.341	8.39893e-58	8.54729e-15	8.76075e-62
Dcn	1.19044e-30	0.595007	0.887	0.503	2.28255e-26	5.23343e-62	0.623665	0.97	0.634	1.00346e-57	1.19044e-30	1.04669e-61
Anp32b	5.94127e-22	-0.437827	0.97	0.983	1.13918e-17	2.3916e-60	-0.540096	0.936	0.987	4.58565e-56	5.94127e-22	4.78319e-60
Eva1b	2.02008e-20	0.373329	0.976	0.953	3.87329e-16	2.96927e-60	0.47105	0.988	0.954	5.69328e-56	2.02008e-20	5.93854e-60
Pmepa1	6.15655e-27	0.801627	0.839	0.599	1.18046e-22	9.80493e-60	0.795581	0.876	0.651	1.88e-55	6.15655e-27	1.96099e-59
App	4.11852e-19	0.421234	0.952	0.865	7.89685e-15	1.22741e-59	0.588514	0.976	0.879	2.35344e-55	4.11852e-19	2.45482e-59
Ptma	1.54843e-26	-0.395644	1	1	2.96897e-22	2.85372e-59	-0.481728	1	1	5.47172e-55	1.54843e-26	5.70744e-59
Rasgrp2	2.64497e-16	0.415962	0.869	0.696	5.07147e-12	1.84971e-57	0.646473	0.897	0.682	3.54663e-53	2.64497e-16	3.69941e-57
Ndufa4l2	3.87258e-18	0.35946	0.875	0.607	7.42528e-14	4.36435e-57	0.638573	0.845	0.479	8.3682e-53	3.87258e-18	8.7287e-57
Ppp1r14a	4.57419e-31	0.6728	0.929	0.662	8.77056e-27	2.17785e-56	0.58689	0.845	0.506	4.17581e-52	4.57419e-31	4.3557e-56
Epha3	1.66164e-14	0.391116	0.446	0.212	3.18603e-10	6.53619e-56	0.565059	0.627	0.256	1.25325e-51	1.66164e-14	1.30724e-55
Olfml2b	5.31698e-18	0.325823	0.304	0.089	1.01948e-13	6.71949e-55	0.372697	0.424	0.112	1.28839e-50	5.31698e-18	1.3439e-54
Col5a1	6.02448e-15	0.430199	0.75	0.554	1.15513e-10	9.61242e-54	0.50614	0.873	0.612	1.84309e-49	6.02448e-15	1.92248e-53
Fbn1	1.70298e-23	0.47348	0.827	0.581	3.2653e-19	1.33619e-53	0.522108	0.882	0.662	2.56202e-49	1.70298e-23	2.67239e-53
Sat1	8.72157e-21	0.486107	0.637	0.35	1.67227e-16	2.73211e-52	0.528088	0.679	0.358	5.23856e-48	8.72157e-21	5.46423e-52
Pdlim2	1.51448e-20	0.475904	0.923	0.809	2.90386e-16	1.00244e-51	0.549947	0.948	0.816	1.92208e-47	1.51448e-20	2.00488e-51
Ccnd1	4.57778e-21	-0.60314	0.208	0.604	8.77744e-17	1.62002e-51	-0.710943	0.194	0.64	3.10623e-47	4.57778e-21	3.24004e-51
Agtr1a	4.59405e-12	0.275594	0.411	0.188	8.80863e-08	1.93025e-51	0.448388	0.512	0.179	3.70106e-47	4.59405e-12	3.8605e-51
Nme1	1.06398e-23	-0.571061	0.673	0.886	2.04008e-19	3.02209e-51	-0.564204	0.788	0.937	5.79455e-47	1.06398e-23	6.04417e-51
Fhl2	1.2995e-15	0.395281	0.94	0.819	2.49166e-11	4.73024e-51	0.517515	0.952	0.747	9.06977e-47	1.2995e-15	9.46049e-51
Thbd	1.07328e-33	0.319334	0.238	0.026	2.0579e-29	4.80174e-51	0.250416	0.239	0.035	9.20686e-47	1.07328e-33	9.60348e-51
Hsp90aa1	1.93436e-20	-0.43012	0.887	0.965	3.70894e-16	9.48071e-51	-0.507097	0.906	0.98	1.81783e-46	1.93436e-20	1.89614e-50
Cdc42ep3	6.382e-25	0.685686	0.792	0.548	1.22368e-20	2.51177e-50	0.70654	0.788	0.494	4.81607e-46	6.382e-25	5.02354e-50
S100a6	4.1744e-20	0.552085	0.917	0.826	8.00399e-16	2.76777e-50	0.616968	0.945	0.865	5.30692e-46	4.1744e-20	5.53553e-50
H19	1.00711e-21	0.628336	0.911	0.809	1.93103e-17	8.91706e-50	0.571451	0.976	0.878	1.70976e-45	1.00711e-21	1.78341e-49
Serping1	4.95124e-28	0.512369	0.917	0.703	9.4935e-24	1.97091e-49	0.500402	0.891	0.696	3.77903e-45	4.95124e-28	3.94182e-49
Ecscr	2.2697e-11	0.283056	0.327	0.146	4.35192e-07	2.38148e-49	0.457493	0.491	0.176	4.56624e-45	2.2697e-11	4.76295e-49
Hmcn1	8.84612e-27	0.741979	0.857	0.663	1.69616e-22	7.4633e-49	0.726688	0.855	0.64	1.43101e-44	8.84612e-27	1.49266e-48
Ctgf	9.8969e-21	0.458661	0.458	0.182	1.89763e-16	3.06093e-48	0.481607	0.494	0.179	5.86903e-44	9.8969e-21	6.12186e-48
Serpinb6b	3.15684e-25	0.388577	0.333	0.082	6.05293e-21	9.05153e-48	0.358649	0.379	0.104	1.73554e-43	3.15684e-25	1.81031e-47
2022-09-11	1.76536e-18	0.447	0.952	0.9	3.3849e-14	9.94705e-48	0.541827	0.967	0.89	1.90725e-43	1.76536e-18	1.98941e-47
Sytl2	3.99036e-18	0.326408	0.375	0.131	7.65112e-14	5.74254e-47	0.363108	0.421	0.131	1.10108e-42	3.99036e-18	1.14851e-46
Itga1	2.03891e-28	0.540494	0.839	0.463	3.9094e-24	1.2354e-46	0.498617	0.785	0.452	2.36876e-42	2.03891e-28	2.4708e-46
Ogn	7.8022e-17	0.460519	0.738	0.463	1.49599e-12	1.24148e-46	0.485507	0.836	0.485	2.38042e-42	7.8022e-17	2.48297e-46
Ahnak	1.0728e-24	0.513301	0.899	0.637	2.05698e-20	3.8325e-46	0.496543	0.876	0.677	7.34844e-42	1.0728e-24	7.665e-46
Col6a1	6.34313e-27	0.671373	0.893	0.639	1.21623e-22	5.63408e-46	0.482364	0.936	0.705	1.08028e-41	6.34313e-27	1.12682e-45
Adamts2	1.84541e-18	0.387884	0.351	0.116	3.53839e-14	2.60741e-45	0.420086	0.494	0.182	4.99945e-41	1.84541e-18	5.21482e-45
Rgs5	2.74085e-17	0.647261	0.792	0.566	5.25531e-13	4.69532e-45	0.688956	0.715	0.397	9.00281e-41	2.74085e-17	9.39064e-45
Pcolce	8.64143e-32	0.565194	0.952	0.698	1.65691e-27	2.74572e-44	0.500924	0.909	0.764	5.26464e-40	8.64143e-32	5.49144e-44
Myl9	2.3675e-21	0.333726	0.994	0.865	4.53944e-17	3.99835e-44	0.407713	0.973	0.884	7.66643e-40	2.3675e-21	7.99669e-44
Gucy1a1	2.99867e-22	0.500239	0.988	0.88	5.74965e-18	6.04207e-44	0.524494	0.967	0.783	1.15851e-39	2.99867e-22	1.20841e-43
Cdh11	1.49916e-21	0.444197	0.982	0.842	2.8745e-17	6.64416e-44	0.484737	0.982	0.861	1.27395e-39	1.49916e-21	1.32883e-43
Art4	3.38835e-18	0.311357	0.238	0.057	6.49681e-14	1.54121e-43	0.370162	0.312	0.076	2.95511e-39	3.38835e-18	3.08242e-43
Laptm4a	2.66117e-15	0.271623	0.994	0.969	5.10253e-11	1.99752e-43	0.35942	0.991	0.977	3.83004e-39	2.66117e-15	3.99503e-43
Nasp	1.15284e-15	-0.502982	0.482	0.747	2.21045e-11	8.63107e-43	-0.595748	0.548	0.827	1.65492e-38	1.15284e-15	1.72621e-42
Pkm	8.21476e-14	-0.339614	0.952	0.983	1.5751e-09	1.5665e-42	-0.512911	0.909	0.974	3.00361e-38	8.21476e-14	3.133e-42
Hspd1	1.39203e-19	-0.449095	0.845	0.914	2.66909e-15	2.20885e-42	-0.470412	0.836	0.956	4.23525e-38	1.39203e-19	4.4177e-42
Prdx5	1.42942e-13	0.288729	0.94	0.917	2.74078e-09	1.17969e-41	0.390437	0.97	0.942	2.26194e-37	1.42942e-13	2.35939e-41
Col6a2	4.74916e-26	0.668287	0.887	0.632	9.10605e-22	1.7081e-41	0.509932	0.9	0.705	3.27512e-37	4.74916e-26	3.41621e-41
Ran	9.09302e-20	-0.554146	0.917	0.972	1.7435e-15	2.01141e-41	-0.558518	0.955	0.979	3.85667e-37	9.09302e-20	4.02281e-41
Cdk4	2.60475e-13	-0.295992	0.899	0.962	4.99435e-09	5.802e-41	-0.383321	0.909	0.98	1.11248e-36	2.60475e-13	1.1604e-40
2022-09-04	2.4211e-17	0.404331	0.607	0.325	4.64222e-13	1.67042e-40	0.470114	0.579	0.266	3.20286e-36	2.4211e-17	3.34084e-40
Il6st	1.6939e-15	0.363801	0.649	0.425	3.24789e-11	2.88962e-40	0.470024	0.721	0.478	5.54055e-36	1.6939e-15	5.77924e-40
Pdgfrb	1.06739e-07	0.267795	0.768	0.602	0.00204662	7.81887e-40	0.483766	0.858	0.587	1.49919e-35	1.06739e-07	1.56377e-39
Peak1	4.04252e-20	0.455959	0.762	0.531	7.75113e-16	1.04078e-39	0.434341	0.785	0.552	1.9956e-35	4.04252e-20	2.08157e-39
Ccl11	2.3754e-13	0.310885	0.22	0.062	4.55459e-09	1.64566e-39	0.498895	0.288	0.07	3.15539e-35	2.3754e-13	3.29132e-39
Lbh	5.90997e-23	0.483895	0.917	0.751	1.13318e-18	1.89651e-39	0.505013	0.873	0.718	3.63637e-35	5.90997e-23	3.79302e-39
Hsd11b1	7.06428e-13	0.259367	0.214	0.062	1.35451e-08	3.10162e-39	0.252659	0.215	0.037	5.94704e-35	7.06428e-13	6.20323e-39
Gata6	1.95057e-16	0.429392	0.613	0.37	3.74003e-12	4.2659e-39	0.430598	0.724	0.425	8.17943e-35	1.95057e-16	8.53179e-39
Vim	2.83125e-17	0.283805	1	0.998	5.42864e-13	1.26857e-38	0.33807	1	0.998	2.43235e-34	2.83125e-17	2.53713e-38
Pbx1	7.67609e-07	-0.29256	0.952	0.938	0.0147181	1.35065e-38	-0.54381	0.906	0.952	2.58973e-34	7.67609e-07	2.70129e-38
Emp2	8.10177e-15	0.391949	0.542	0.305	1.55343e-10	1.84933e-38	0.454158	0.636	0.357	3.54591e-34	8.10177e-15	3.69866e-38
Ybx1	1.23569e-12	-0.2774	0.988	0.993	2.36931e-08	1.87126e-38	-0.335305	1	0.997	3.58795e-34	1.23569e-12	3.74251e-38
Hspe1	3.52565e-14	-0.287433	0.946	0.974	6.76008e-10	1.87817e-38	-0.372921	0.952	0.984	3.6012e-34	3.52565e-14	3.75634e-38
Slfn5	2.16429e-15	0.26403	0.423	0.175	4.14981e-11	7.92664e-38	0.315305	0.364	0.114	1.51985e-33	2.16429e-15	1.58533e-37
Id1	2.72007e-15	-0.559183	0.5	0.767	5.21546e-11	1.31722e-37	-0.603958	0.352	0.707	2.52564e-33	2.72007e-15	2.63445e-37
Ppic	4.96425e-13	0.288285	0.946	0.913	9.51845e-09	1.43097e-37	0.378465	0.967	0.943	2.74375e-33	4.96425e-13	2.86194e-37
Serbp1	1.11341e-16	-0.289518	0.994	0.995	2.13484e-12	1.70276e-37	-0.315028	0.997	0.995	3.26487e-33	1.11341e-16	3.40552e-37
Igfbp7	1.41799e-14	0.44989	0.994	0.94	2.71884e-10	1.82826e-37	0.472482	0.994	0.946	3.5055e-33	1.41799e-14	3.65652e-37
2310022B05Rik	2.83299e-19	0.440485	0.762	0.539	5.43197e-15	3.76803e-37	0.44892	0.776	0.575	7.22483e-33	2.83299e-19	7.53607e-37
Ctsl	2.63914e-21	0.408092	0.988	0.905	5.06029e-17	6.1703e-37	0.411078	0.964	0.923	1.18309e-32	2.63914e-21	1.23406e-36
Adamts1	7.04425e-21	0.546226	0.696	0.408	1.35066e-16	6.2889e-37	0.49021	0.742	0.476	1.20583e-32	7.04425e-21	1.25778e-36
Pdlim5	2.43959e-12	0.331584	0.512	0.3	4.67768e-08	7.48205e-37	0.411621	0.576	0.304	1.43461e-32	2.43959e-12	1.49641e-36
Myl12a	7.89452e-19	0.331644	0.988	0.962	1.51369e-14	1.11065e-36	0.330547	0.982	0.97	2.12957e-32	7.89452e-19	2.22131e-36
Spc24	1.66897e-17	-0.649592	0.095	0.422	3.20008e-13	2.50885e-36	-0.636096	0.148	0.508	4.81046e-32	1.66897e-17	5.01769e-36
Bicc1	3.94629e-20	0.485709	0.815	0.647	7.56662e-16	2.67452e-36	0.448459	0.833	0.668	5.12813e-32	3.94629e-20	5.34904e-36
Hmgn2	4.93359e-20	-0.54034	0.845	0.936	9.45967e-16	3.81384e-36	-0.459584	0.921	0.965	7.31266e-32	4.93359e-20	7.62768e-36
Selenoh	1.34455e-20	-0.613897	0.649	0.834	2.57804e-16	4.79117e-36	-0.517302	0.773	0.895	9.1866e-32	1.34455e-20	9.58235e-36
Aspn	2.12184e-17	0.461684	0.631	0.341	4.06842e-13	5.55405e-36	0.472489	0.636	0.324	1.06493e-31	2.12184e-17	1.11081e-35
Fstl1	2.29029e-15	0.360619	0.976	0.932	4.39141e-11	1.42905e-35	0.31723	0.988	0.961	2.74005e-31	2.29029e-15	2.85809e-35
Pclaf	6.24632e-22	-1.05097	0.113	0.502	1.19767e-17	1.96556e-35	-0.963214	0.242	0.573	3.76876e-31	6.24632e-22	3.93112e-35
Ltbp4	1.97118e-15	0.442384	0.744	0.548	3.77954e-11	2.26684e-35	0.431688	0.794	0.587	4.34644e-31	1.97118e-15	4.53368e-35
Srpx	5.707e-14	0.295947	0.458	0.221	1.09426e-09	3.60261e-35	0.349554	0.539	0.263	6.90764e-31	5.707e-14	7.20522e-35
Slc9a3r2	1.7186e-10	0.320537	0.643	0.476	3.29525e-06	5.8476e-35	0.372026	0.803	0.579	1.12122e-30	1.7186e-10	1.16952e-34
Dctpp1	2.01638e-16	-0.457481	0.304	0.613	3.86621e-12	6.25788e-35	-0.431841	0.342	0.688	1.19989e-30	2.01638e-16	1.25158e-34
Pi15	5.00152e-22	0.386439	0.399	0.127	9.58991e-18	6.31013e-35	0.32887	0.424	0.159	1.2099e-30	5.00152e-22	1.26203e-34
Atp5g1	7.47202e-11	-0.251743	0.929	0.96	1.43269e-06	4.12145e-34	-0.329674	0.942	0.983	7.90247e-30	7.47202e-11	8.2429e-34
Tmem119	1.013e-15	0.324165	0.512	0.263	1.94234e-11	4.75336e-34	0.366481	0.618	0.347	9.11409e-30	1.013e-15	9.50671e-34
Rcn3	4.87707e-14	0.325541	0.964	0.927	9.35129e-10	5.1457e-34	0.37876	0.988	0.96	9.86637e-30	4.87707e-14	1.02914e-33
Rasl11a	3.7753e-10	0.261725	0.774	0.557	7.23875e-06	1.03475e-33	0.411365	0.779	0.527	1.98403e-29	3.7753e-10	2.0695e-33
Snrpf	1.83277e-08	-0.267306	0.81	0.911	0.000351416	1.80493e-33	-0.368184	0.852	0.95	3.46078e-29	1.83277e-08	3.60987e-33
Ldhb	1.90074e-13	-0.404689	0.613	0.847	3.64448e-09	2.04292e-33	-0.431171	0.53	0.827	3.9171e-29	1.90074e-13	4.08585e-33
Arap1	5.20586e-27	0.498569	0.774	0.456	9.98173e-23	3.4133e-33	0.425427	0.776	0.573	6.54466e-29	5.20586e-27	6.8266e-33
Gpi1	2.65654e-09	-0.289363	0.78	0.881	5.09365e-05	3.62979e-33	-0.393741	0.642	0.879	6.95976e-29	2.65654e-09	7.25958e-33
Tyms	1.1341e-15	-0.561546	0.155	0.48	2.17452e-11	1.17908e-32	-0.625592	0.255	0.587	2.26077e-28	1.1341e-15	2.35816e-32
Cnn2	1.25427e-14	0.341011	0.982	0.913	2.40494e-10	1.27513e-32	0.396286	0.973	0.909	2.44493e-28	1.25427e-14	2.55026e-32
Basp1	8.68827e-11	0.363394	0.958	0.915	1.66589e-06	2.72246e-32	0.503195	0.979	0.943	5.22004e-28	8.68827e-11	5.44492e-32
Ranbp1	2.30713e-18	-0.483745	0.744	0.895	4.42369e-14	2.82222e-32	-0.456081	0.815	0.928	5.41133e-28	2.30713e-18	5.64444e-32
Ccnd2	2.72615e-13	-0.464489	0.738	0.917	5.22711e-09	2.88235e-32	-0.517432	0.791	0.93	5.52662e-28	2.72615e-13	5.7647e-32
Fn1	1.71538e-11	0.318811	0.946	0.842	3.28906e-07	4.69103e-32	0.426275	0.985	0.897	8.99459e-28	1.71538e-11	9.38207e-32
Rrbp1	1.64373e-12	0.349727	0.958	0.932	3.15168e-08	4.91809e-32	0.349791	0.988	0.964	9.42995e-28	1.64373e-12	9.83618e-32
Cfh	8.72213e-15	0.357167	0.97	0.826	1.67238e-10	1.30072e-31	0.450702	0.912	0.766	2.494e-27	8.72213e-15	2.60144e-31
Rbp1	2.13013e-21	0.488277	0.97	0.898	4.0843e-17	2.2287e-31	0.338482	0.988	0.941	4.2733e-27	2.13013e-21	4.45739e-31
Snrpd1	1.34951e-16	-0.391422	0.833	0.926	2.58754e-12	2.65251e-31	-0.366582	0.867	0.951	5.08593e-27	1.34951e-16	5.30503e-31
Smc2	1.80347e-14	-0.652158	0.208	0.5	3.45797e-10	4.07744e-31	-0.656363	0.248	0.565	7.81808e-27	1.80347e-14	8.15488e-31
H2afx	7.00502e-16	-0.911587	0.339	0.629	1.34314e-11	6.90685e-31	-0.881741	0.445	0.705	1.32432e-26	7.00502e-16	1.38137e-30
Stx2	2.58952e-11	0.302054	0.476	0.287	4.96514e-07	7.51931e-31	0.364871	0.536	0.298	1.44175e-26	2.58952e-11	1.50386e-30
Actn4	1.51435e-06	0.256606	0.804	0.767	0.0290361	1.58949e-30	0.378483	0.873	0.761	3.0477e-26	1.51435e-06	3.17899e-30
Tgfbi	5.03094e-09	-0.347378	0.482	0.719	9.64633e-05	1.75179e-30	-0.489683	0.455	0.738	3.35889e-26	5.03094e-09	3.50359e-30
Serpinb6a	1.05294e-10	0.296142	0.792	0.691	2.0189e-06	1.82917e-30	0.387543	0.836	0.755	3.50726e-26	1.05294e-10	3.65835e-30
Slc25a5	1.15642e-14	-0.476979	0.702	0.86	2.21732e-10	1.88336e-30	-0.489243	0.703	0.88	3.61115e-26	1.15642e-14	3.76672e-30
Rock2	1.33089e-09	0.293512	0.821	0.71	2.55185e-05	2.48932e-30	0.348549	0.839	0.721	4.77301e-26	1.33089e-09	4.97863e-30
Marcks	5.57395e-16	0.312553	0.994	0.963	1.06875e-11	2.91944e-30	0.309904	1	0.979	5.59774e-26	5.57395e-16	5.83888e-30
Bst2	5.6673e-09	0.333624	0.565	0.377	0.000108665	4.23417e-30	0.432767	0.573	0.297	8.1186e-26	5.6673e-09	8.46834e-30
Fkbp3	1.21387e-12	-0.314871	0.732	0.897	2.32748e-08	7.45245e-30	-0.339587	0.806	0.926	1.42893e-25	1.21387e-12	1.49049e-29
Mbnl2	6.92995e-15	0.370136	0.857	0.746	1.32875e-10	2.57445e-29	0.387057	0.858	0.763	4.93625e-25	6.92995e-15	5.1489e-29
Serpinh1	3.61271e-13	0.250718	0.994	0.992	6.92701e-09	3.20745e-29	0.266442	1	0.995	6.14996e-25	3.61271e-13	6.41489e-29
Hmgn1	6.77257e-15	-0.263083	0.976	0.996	1.29857e-10	3.58569e-29	-0.268065	0.988	0.998	6.8752e-25	6.77257e-15	7.17137e-29
Tns3	1.13873e-09	0.286612	0.607	0.466	2.18341e-05	4.32965e-29	0.407802	0.676	0.485	8.30166e-25	1.13873e-09	8.65929e-29
Neto2	8.47066e-15	-0.396428	0.03	0.32	1.62416e-10	4.70683e-29	-0.323343	0.024	0.329	9.02487e-25	8.47066e-15	9.41365e-29
Tpm4	4.55962e-13	0.298558	0.982	0.958	8.74262e-09	1.24258e-28	0.33175	0.991	0.96	2.38253e-24	4.55962e-13	2.48517e-28
Hnrnpd	3.23692e-11	-0.306943	0.881	0.952	6.20648e-07	1.35866e-28	-0.337518	0.924	0.963	2.6051e-24	3.23692e-11	2.71733e-28
Plac8	3.55245e-19	0.719837	0.792	0.641	6.81147e-15	1.3704e-28	0.70148	0.745	0.596	2.6276e-24	3.55245e-19	2.74079e-28
Daam1	2.62889e-09	0.401429	0.375	0.214	5.04063e-05	1.73359e-28	0.319086	0.436	0.203	3.32399e-24	2.62889e-09	3.46718e-28
Sptbn1	3.48043e-12	0.295752	0.935	0.899	6.67338e-08	3.08635e-28	0.356618	0.945	0.898	5.91778e-24	3.48043e-12	6.17271e-28
Fibin	2.52063e-13	-0.541323	0.101	0.379	4.83306e-09	3.57554e-28	-0.503513	0.109	0.425	6.85573e-24	2.52063e-13	7.15107e-28
Peg3	1.19652e-16	0.517233	0.911	0.8	2.29421e-12	4.19531e-28	0.416016	0.945	0.866	8.04409e-24	1.19652e-16	8.39063e-28
Lmnb1	5.86775e-12	-0.547179	0.53	0.694	1.12508e-07	4.74338e-28	-0.580363	0.6	0.779	9.09497e-24	5.86775e-12	9.48677e-28
Nucks1	4.32165e-10	-0.406264	0.798	0.881	8.28633e-06	6.07609e-28	-0.457392	0.839	0.914	1.16503e-23	4.32165e-10	1.21522e-27
Cenpm	9.1512e-13	-0.331152	0.095	0.38	1.75465e-08	7.47704e-28	-0.363165	0.115	0.432	1.43365e-23	9.1512e-13	1.49541e-27
Hist1h2ap	5.27575e-11	-1.55138	0.202	0.45	1.01157e-06	7.61646e-28	-1.86133	0.397	0.665	1.46038e-23	5.27575e-11	1.52329e-27
Birc5	3.46473e-15	-0.824181	0.125	0.421	6.64327e-11	9.79448e-28	-0.792691	0.206	0.495	1.87799e-23	3.46473e-15	1.9589e-27
Stmn1	2.58617e-14	-0.666806	0.798	0.905	4.95873e-10	1.10558e-27	-0.577488	0.915	0.968	2.11985e-23	2.58617e-14	2.21117e-27
Svep1	1.07889e-13	0.259935	0.363	0.152	2.06866e-09	1.501e-27	0.265561	0.403	0.167	2.87803e-23	1.07889e-13	3.00201e-27
Ssrp1	1.17402e-08	-0.287775	0.679	0.812	0.000225107	2.07295e-27	-0.368129	0.691	0.872	3.97468e-23	1.17402e-08	4.14591e-27
Hmgb2	1.94387e-11	-1.06717	0.827	0.887	3.72718e-07	2.40442e-27	-1.13196	0.821	0.901	4.61024e-23	1.94387e-11	4.80885e-27
P4ha3	6.39509e-16	0.251182	0.268	0.08	1.2262e-11	2.88256e-27	0.260966	0.327	0.122	5.52701e-23	6.39509e-16	5.76511e-27
Set	5.86744e-11	-0.270734	0.988	0.98	1.12502e-06	3.17722e-27	-0.327594	0.976	0.984	6.092e-23	5.86744e-11	6.35443e-27
Rsu1	5.01151e-11	0.286806	0.893	0.845	9.60907e-07	4.28584e-27	0.335355	0.933	0.882	8.21767e-23	5.01151e-11	8.57168e-27
Efemp2	1.19571e-15	0.358533	0.923	0.813	2.29264e-11	5.67692e-27	0.336241	0.921	0.876	1.08849e-22	1.19571e-15	1.13538e-26
Actn1	1.06807e-06	0.265049	0.845	0.782	0.0204791	5.91381e-27	0.366168	0.888	0.79	1.13391e-22	1.06807e-06	1.18276e-26
Gmnn	1.693e-09	-0.301755	0.137	0.367	3.24615e-05	6.16576e-27	-0.361253	0.142	0.463	1.18222e-22	1.693e-09	1.23315e-26
Cox5a	2.76798e-14	-0.324749	0.863	0.952	5.30732e-10	6.18673e-27	-0.331071	0.891	0.956	1.18624e-22	2.76798e-14	1.23735e-26
Cks1b	3.96583e-12	-0.51212	0.512	0.722	7.60408e-08	7.69115e-27	-0.479848	0.606	0.809	1.4747e-22	3.96583e-12	1.53823e-26
Pkdcc	3.49965e-11	0.433614	0.893	0.825	6.71023e-07	9.88274e-27	0.476226	0.912	0.868	1.89492e-22	3.49965e-11	1.97655e-26
Txn1	1.29402e-17	-0.353847	0.946	0.981	2.48115e-13	1.28798e-26	-0.285576	0.967	0.984	2.46957e-22	1.29402e-17	2.57595e-26
Myh9	8.8056e-08	0.267425	0.768	0.645	0.00168839	1.51709e-26	0.390105	0.791	0.629	2.90887e-22	8.8056e-08	3.03418e-26
Mcm7	2.59736e-13	-0.381757	0.214	0.534	4.98018e-09	2.65829e-26	-0.420479	0.315	0.616	5.09701e-22	2.59736e-13	5.31659e-26
Ncl	3.70323e-09	-0.259497	0.988	0.989	7.10056e-05	3.18029e-26	-0.317304	0.979	0.993	6.09789e-22	3.70323e-09	6.36058e-26
Srsf3	1.47555e-16	-0.405721	0.887	0.976	2.82922e-12	4.4953e-26	-0.33967	0.964	0.986	8.61928e-22	1.47555e-16	8.99059e-26
Lama2	3.80899e-20	0.369155	0.548	0.252	7.30336e-16	5.83527e-26	0.330442	0.533	0.31	1.11886e-21	3.80899e-20	1.16705e-25
Ntm	9.99589e-14	-0.350657	0.054	0.344	1.91661e-09	6.51496e-26	-0.326794	0.082	0.387	1.24918e-21	9.99589e-14	1.30299e-25
Alx1	0.000222366	-0.299771	0.196	0.321	1	9.49087e-26	-0.46523	0.088	0.379	1.81978e-21	0.000222366	1.89817e-25
Tagln2	5.61282e-16	0.457545	0.917	0.827	1.0762e-11	1.25537e-25	0.390894	0.924	0.84	2.40704e-21	5.61282e-16	2.51074e-25
Cenpe	4.3397e-11	-0.525653	0.077	0.317	8.32094e-07	1.30053e-25	-0.585482	0.085	0.374	2.49363e-21	4.3397e-11	2.60105e-25
Mki67	8.25208e-14	-0.783409	0.101	0.379	1.58225e-09	1.40326e-25	-0.740437	0.158	0.443	2.69061e-21	8.25208e-14	2.80651e-25
Prmt1	1.69953e-10	-0.280597	0.857	0.949	3.25867e-06	1.67517e-25	-0.31659	0.909	0.964	3.21197e-21	1.69953e-10	3.35034e-25
Cks2	3.8741e-10	-0.739712	0.256	0.469	7.4282e-06	1.75112e-25	-0.767287	0.288	0.558	3.3576e-21	3.8741e-10	3.50224e-25
Ube2s	1.97528e-12	-0.57786	0.845	0.902	3.7874e-08	1.81638e-25	-0.526939	0.879	0.934	3.48272e-21	1.97528e-12	3.63276e-25
Pgk1	7.29521e-08	-0.25534	0.827	0.942	0.00139878	1.89676e-25	-0.354978	0.824	0.92	3.63685e-21	7.29521e-08	3.79352e-25
Serinc3	1.8051e-08	0.285258	0.637	0.496	0.00034611	2.32563e-25	0.317001	0.679	0.487	4.45915e-21	1.8051e-08	4.65125e-25
Snrpe	3.35105e-12	-0.260076	0.893	0.958	6.4253e-08	3.50845e-25	-0.274712	0.894	0.971	6.72709e-21	3.35105e-12	7.01689e-25
Mxra8	1.64566e-10	0.314266	0.667	0.503	3.1554e-06	4.33567e-25	0.337191	0.755	0.567	8.31322e-21	1.64566e-10	8.67134e-25
Sri	4.23863e-08	0.276778	0.887	0.863	0.000812715	4.9888e-25	0.293725	0.909	0.885	9.56552e-21	4.23863e-08	9.97759e-25
Lsm4	9.85809e-15	-0.343755	0.714	0.891	1.89019e-10	6.84008e-25	-0.343961	0.745	0.882	1.31152e-20	9.85809e-15	1.36802e-24
Hist1h2ae	1.07511e-10	-0.910557	0.125	0.366	2.06142e-06	7.86698e-25	-1.12552	0.164	0.452	1.50842e-20	1.07511e-10	1.5734e-24
Anp32e	1.21023e-10	-0.345943	0.435	0.686	2.32049e-06	8.3253e-25	-0.374516	0.515	0.746	1.59629e-20	1.21023e-10	1.66506e-24
Isyna1	4.78159e-09	-0.322475	0.387	0.653	9.16822e-05	8.53565e-25	-0.428816	0.452	0.711	1.63663e-20	4.78159e-09	1.70713e-24
Rab34	1.73947e-06	0.251116	0.786	0.735	0.0333527	9.53195e-25	0.304175	0.879	0.79	1.82766e-20	1.73947e-06	1.90639e-24
Hmgb3	2.23789e-09	-0.342864	0.619	0.765	4.29092e-05	1.0625e-24	-0.401473	0.6	0.807	2.03724e-20	2.23789e-09	2.125e-24
Ldb2	6.13376e-16	0.426845	0.768	0.566	1.17609e-11	1.18646e-24	0.377058	0.776	0.61	2.27492e-20	6.13376e-16	2.37292e-24
Dlc1	8.46931e-12	0.328586	0.857	0.724	1.62391e-07	1.83951e-24	0.377605	0.839	0.726	3.52707e-20	8.46931e-12	3.67901e-24
Adm	1.14336e-22	0.635673	0.47	0.18	2.19228e-18	2.09848e-24	0.322839	0.348	0.142	4.02362e-20	1.14336e-22	4.19695e-24
Ccnb2	2.17762e-13	-0.61689	0.107	0.389	4.17537e-09	2.48676e-24	-0.576939	0.167	0.453	4.76812e-20	2.17762e-13	4.97352e-24
Nfia	3.76981e-08	0.283723	0.762	0.686	0.000722823	2.50573e-24	0.359053	0.836	0.744	4.80449e-20	3.76981e-08	5.01146e-24
H6pd	1.70741e-12	0.270492	0.345	0.153	3.27378e-08	2.53979e-24	0.255045	0.373	0.166	4.8698e-20	1.70741e-12	5.07959e-24
Kif22	1.23381e-10	-0.325448	0.042	0.269	2.36571e-06	2.70418e-24	-0.371993	0.052	0.322	5.185e-20	1.23381e-10	5.40836e-24
Knstrn	2.33436e-10	-0.32624	0.101	0.344	4.47591e-06	2.95557e-24	-0.369505	0.106	0.392	5.66702e-20	2.33436e-10	5.91115e-24
C1qtnf2	1.01144e-14	0.372699	0.464	0.222	1.93933e-10	3.55072e-24	0.363228	0.561	0.325	6.80816e-20	1.01144e-14	7.10145e-24
Twist1	2.72904e-10	-0.307466	0.244	0.511	5.23267e-06	4.37736e-24	-0.347926	0.242	0.538	8.39315e-20	2.72904e-10	8.75472e-24
Tmem59	1.3239e-09	0.262338	0.917	0.898	2.53845e-05	4.37863e-24	0.274516	0.952	0.918	8.39559e-20	1.3239e-09	8.75726e-24
1810058I24Rik	4.80931e-13	0.312343	0.929	0.898	9.22137e-09	4.72428e-24	0.301693	0.945	0.942	9.05833e-20	4.80931e-13	9.44855e-24
Alyref	7.31002e-08	-0.266304	0.56	0.73	0.00140162	5.69164e-24	-0.325639	0.6	0.805	1.09131e-19	7.31002e-08	1.13833e-23
Tuba1b	1.21169e-12	-0.545779	0.863	0.926	2.32329e-08	6.27975e-24	-0.460195	0.93	0.956	1.20408e-19	1.21169e-12	1.25595e-23
Cxcl12	8.31746e-09	0.380566	0.625	0.434	0.000159479	1.02209e-23	0.395323	0.742	0.507	1.95975e-19	8.31746e-09	2.04417e-23
Aldh1a2	7.80126e-13	-0.626598	0.268	0.525	1.49581e-08	1.06376e-23	-0.673231	0.312	0.56	2.03965e-19	7.80126e-13	2.12752e-23
Shcbp1	6.67619e-12	-0.270969	0.024	0.266	1.28009e-07	1.28823e-23	-0.288559	0.058	0.322	2.47005e-19	6.67619e-12	2.57646e-23
Gpc3	1.46122e-13	0.325187	0.988	0.974	2.80175e-09	1.90776e-23	0.345841	0.985	0.973	3.65795e-19	1.46122e-13	3.81553e-23
Lima1	1.24786e-10	0.318965	0.774	0.666	2.39264e-06	2.29135e-23	0.359939	0.806	0.702	4.39343e-19	1.24786e-10	4.58269e-23
Cct3	4.28714e-09	-0.26147	0.827	0.92	8.22016e-05	2.41229e-23	-0.282566	0.882	0.94	4.62533e-19	4.28714e-09	4.82458e-23
Eif5a	5.93773e-10	-0.272764	0.964	0.983	1.1385e-05	2.42077e-23	-0.32053	0.976	0.99	4.64158e-19	5.93773e-10	4.84154e-23
Ccna2	1.17082e-13	-0.495086	0.042	0.314	2.24493e-09	2.46164e-23	-0.482067	0.106	0.374	4.71995e-19	1.17082e-13	4.92328e-23
Rabac1	3.10441e-09	0.262786	0.875	0.838	5.9524e-05	2.96275e-23	0.300666	0.93	0.865	5.68077e-19	3.10441e-09	5.92549e-23
Nectin2	3.97062e-15	0.389125	0.774	0.594	7.61326e-11	3.83973e-23	0.342709	0.755	0.628	7.3623e-19	3.97062e-15	7.67946e-23
Atad2	1.36253e-12	-0.419566	0.131	0.417	2.61252e-08	3.98832e-23	-0.370567	0.185	0.476	7.64721e-19	1.36253e-12	7.97665e-23
Racgap1	3.55036e-10	-0.347189	0.077	0.307	6.80747e-06	7.7021e-23	-0.384224	0.097	0.368	1.4768e-18	3.55036e-10	1.54042e-22
Col15a1	9.34618e-07	-0.378545	0.119	0.297	0.0179204	7.89213e-23	-0.526147	0.07	0.329	1.51324e-18	9.34618e-07	1.57843e-22
Pbk	1.66051e-11	-0.307535	0.018	0.248	3.18386e-07	8.86097e-23	-0.314553	0.039	0.295	1.699e-18	1.66051e-11	1.77219e-22
Srsf7	6.38003e-08	-0.290638	0.661	0.825	0.00122331	9.00623e-23	-0.3515	0.742	0.877	1.72685e-18	6.38003e-08	1.80125e-22
Sgo2a	5.005e-09	-0.271861	0.03	0.221	9.59659e-05	1.54186e-22	-0.312976	0.027	0.273	2.95636e-18	5.005e-09	3.08371e-22
Usp1	3.47221e-11	-0.332982	0.244	0.508	6.65761e-07	1.8189e-22	-0.33132	0.291	0.58	3.48755e-18	3.47221e-11	3.63779e-22
Ccdc34	2.05487e-10	-0.396106	0.655	0.784	3.94001e-06	1.9078e-22	-0.413384	0.691	0.828	3.65802e-18	2.05487e-10	3.8156e-22
Ube2c	3.87125e-13	-1.01337	0.137	0.416	7.42274e-09	2.38743e-22	-1.01327	0.197	0.463	4.57765e-18	3.87125e-13	4.77485e-22
Gucy1b1	5.19188e-08	0.311702	0.696	0.554	0.000995492	2.41476e-22	0.313966	0.694	0.502	4.63006e-18	5.19188e-08	4.82952e-22
Cenpk	8.51556e-12	-0.276464	0.06	0.318	1.63277e-07	2.46663e-22	-0.266989	0.085	0.36	4.72951e-18	8.51556e-12	4.93325e-22
Dnajc9	2.95645e-08	-0.33064	0.327	0.533	0.000566871	2.64402e-22	-0.359863	0.336	0.62	5.06964e-18	2.95645e-08	5.28803e-22
Snx18	1.38377e-13	0.390181	0.726	0.545	2.65323e-09	3.65867e-22	0.317483	0.727	0.557	7.01514e-18	1.38377e-13	7.31735e-22
Hdgf	7.37831e-09	-0.278891	0.78	0.875	0.000141472	3.97403e-22	-0.297779	0.758	0.898	7.61981e-18	7.37831e-09	7.94807e-22
Hnrnpab	4.4482e-10	-0.301058	0.756	0.869	8.52898e-06	6.61273e-22	-0.320229	0.821	0.918	1.26792e-17	4.4482e-10	1.32255e-21
Lockd	3.78973e-11	-0.322068	0.036	0.269	7.26643e-07	6.72086e-22	-0.329267	0.088	0.353	1.28866e-17	3.78973e-11	1.34417e-21
Ckap2l	5.40011e-11	-0.327688	0.03	0.257	1.03542e-06	9.57174e-22	-0.363433	0.058	0.308	1.83528e-17	5.40011e-11	1.91435e-21
Cdca8	3.06598e-12	-0.59032	0.101	0.359	5.87871e-08	9.79091e-22	-0.574403	0.152	0.409	1.87731e-17	3.06598e-12	1.95818e-21
Tacc3	2.43354e-11	-0.377931	0.065	0.311	4.66608e-07	9.99573e-22	-0.378359	0.1	0.362	1.91658e-17	2.43354e-11	1.99915e-21
Hnrnpa2b1	3.11329e-10	-0.269462	0.964	0.983	5.96943e-06	1.01528e-21	-0.289412	0.97	0.988	1.94669e-17	3.11329e-10	2.03055e-21
Hmgb1	1.19805e-10	-0.350122	1	0.997	2.29713e-06	1.01686e-21	-0.348046	0.997	0.998	1.94972e-17	1.19805e-10	2.03371e-21
Kif15	3.12713e-11	-0.300243	0.03	0.261	5.99596e-07	1.06613e-21	-0.292553	0.048	0.297	2.04419e-17	3.12713e-11	2.13225e-21
Kif20b	4.30815e-09	-0.297438	0.048	0.246	8.26045e-05	1.57849e-21	-0.328114	0.052	0.297	3.02659e-17	4.30815e-09	3.15697e-21
Ddx39	8.69757e-09	-0.252454	0.25	0.492	0.000166767	1.80029e-21	-0.298145	0.282	0.571	3.45187e-17	8.69757e-09	3.60058e-21
Cebpd	3.03806e-12	0.542247	0.726	0.539	5.82517e-08	1.84555e-21	0.374627	0.709	0.517	3.53866e-17	3.03806e-12	3.6911e-21
Srsf2	1.05893e-08	-0.289022	0.78	0.893	0.000203038	1.9729e-21	-0.318341	0.839	0.945	3.78284e-17	1.05893e-08	3.9458e-21
Hmmr	2.9785e-11	-0.444844	0.018	0.245	5.71097e-07	2.28106e-21	-0.459116	0.052	0.295	4.37371e-17	2.9785e-11	4.56213e-21
Tk1	1.58092e-09	-0.285098	0.042	0.247	3.03125e-05	2.78045e-21	-0.322205	0.064	0.319	5.33123e-17	1.58092e-09	5.56089e-21
Cenpf	1.21048e-13	-0.876723	0.06	0.338	2.32098e-09	3.02759e-21	-0.848651	0.136	0.393	5.80509e-17	1.21048e-13	6.05517e-21
Cenpw	4.13389e-11	-0.298395	0.125	0.383	7.92632e-07	3.98319e-21	-0.306487	0.17	0.444	7.63738e-17	4.13389e-11	7.96639e-21
Tpx2	1.85601e-08	-0.489689	0.125	0.32	0.000355872	4.27946e-21	-0.523656	0.106	0.357	8.20544e-17	1.85601e-08	8.55892e-21
Top2a	1.21474e-12	-1.03587	0.161	0.422	2.32914e-08	4.46688e-21	-0.968737	0.245	0.48	8.5648e-17	1.21474e-12	8.93377e-21
Mfap2	1.96526e-09	0.266171	0.923	0.894	3.76818e-05	5.89091e-21	0.27263	0.979	0.93	1.12952e-16	1.96526e-09	1.17818e-20
Snrpa1	3.40737e-11	-0.300796	0.452	0.702	6.53328e-07	6.69353e-21	-0.296147	0.567	0.784	1.28342e-16	3.40737e-11	1.33871e-20
Ndc80	2.35042e-10	-0.250415	0.012	0.22	4.5067e-06	7.09925e-21	-0.268338	0.033	0.269	1.36121e-16	2.35042e-10	1.41985e-20
H1fx	2.79313e-07	-0.298851	0.81	0.896	0.00535556	8.95943e-21	-0.366727	0.788	0.915	1.71788e-16	2.79313e-07	1.79189e-20
Hspb1	9.86187e-06	-0.453305	0.25	0.41	0.189091	9.49833e-21	-0.521755	0.212	0.471	1.82121e-16	9.86187e-06	1.89967e-20
Cdca3	3.24469e-10	-0.303026	0.071	0.309	6.22136e-06	1.6272e-20	-0.335926	0.109	0.369	3.11999e-16	3.24469e-10	3.25439e-20
S100a13	2.60525e-12	0.330073	0.702	0.539	4.9953e-08	1.73911e-20	0.263524	0.736	0.58	3.33457e-16	2.60525e-12	3.47822e-20
Incenp	1.43406e-09	-0.336793	0.071	0.29	2.74966e-05	1.87964e-20	-0.379578	0.094	0.339	3.60402e-16	1.43406e-09	3.75928e-20
Nop56	1.76847e-09	-0.296046	0.423	0.661	3.39086e-05	2.01326e-20	-0.304626	0.485	0.726	3.86022e-16	1.76847e-09	4.02651e-20
Lbhd2	1.57062e-10	-0.250409	0.012	0.221	3.01151e-06	2.04787e-20	-0.259122	0.024	0.256	3.92659e-16	1.57062e-10	4.09574e-20
Cdc42ep5	1.44306e-12	0.330738	0.714	0.552	2.76693e-08	2.06785e-20	0.274939	0.748	0.617	3.9649e-16	1.44306e-12	4.13571e-20
Lgi2	2.15507e-11	0.280553	0.488	0.26	4.13213e-07	2.16009e-20	0.305054	0.533	0.321	4.14176e-16	2.15507e-11	4.32018e-20
Cenpa	7.96079e-13	-0.818837	0.143	0.412	1.5264e-08	2.3815e-20	-0.63903	0.209	0.467	4.5663e-16	7.96079e-13	4.76301e-20
Phgdh	3.98775e-10	-0.296944	0.185	0.452	7.64612e-06	2.50389e-20	-0.35082	0.252	0.532	4.80096e-16	3.98775e-10	5.00778e-20
Cdk1	2.04948e-08	-0.588322	0.298	0.471	0.000392967	4.84917e-20	-0.678322	0.336	0.555	9.29781e-16	2.04948e-08	9.69835e-20
Lrriq1	8.1099e-06	-0.259539	0.095	0.25	0.155499	6.05175e-20	-0.299077	0.015	0.234	1.16036e-15	8.1099e-06	1.21035e-19
Sgo1	6.48071e-12	-0.288946	0.012	0.248	1.24261e-07	6.17839e-20	-0.270111	0.052	0.287	1.18465e-15	6.48071e-12	1.23568e-19
Sms	2.62818e-10	-0.303099	0.345	0.605	5.03927e-06	8.35289e-20	-0.271421	0.415	0.672	1.60158e-15	2.62818e-10	1.67058e-19
Gstm2	1.32258e-11	0.319936	0.649	0.475	2.53591e-07	8.87718e-20	0.268912	0.664	0.525	1.70211e-15	1.32258e-11	1.77544e-19
Clspn	4.07887e-08	-0.253536	0.083	0.278	0.000782083	9.18673e-20	-0.280317	0.076	0.323	1.76146e-15	4.07887e-08	1.83735e-19
C1qbp	5.2623e-09	-0.262399	0.637	0.827	0.000100899	1.01768e-19	-0.27674	0.715	0.857	1.9513e-15	5.2623e-09	2.03536e-19
Knl1	7.12063e-11	-0.322072	0.024	0.245	1.36531e-06	1.03331e-19	-0.311834	0.058	0.289	1.98126e-15	7.12063e-11	2.06662e-19
Col12a1	1.4819e-11	0.352048	0.69	0.501	2.84139e-07	1.32463e-19	0.339978	0.658	0.491	2.53984e-15	1.4819e-11	2.64925e-19
Aurkb	1.04577e-08	-0.350521	0.06	0.253	0.000200515	1.48937e-19	-0.388496	0.073	0.303	2.85572e-15	1.04577e-08	2.97874e-19
Hnrnpa3	4.38714e-09	-0.270383	0.905	0.959	8.4119e-05	1.87049e-19	-0.265516	0.97	0.985	3.58648e-15	4.38714e-09	3.74098e-19
Ddx39b	1.16447e-11	-0.297756	0.839	0.929	2.23276e-07	2.50757e-19	-0.257634	0.855	0.959	4.80802e-15	1.16447e-11	5.01515e-19
Kif23	1.00124e-10	-0.322935	0.018	0.236	1.91977e-06	3.3214e-19	-0.364377	0.058	0.283	6.36845e-15	1.00124e-10	6.6428e-19
Cdc20	3.95424e-09	-0.535974	0.065	0.273	7.58186e-05	4.26311e-19	-0.605853	0.109	0.346	8.17408e-15	3.95424e-09	8.52621e-19
Ccnb1	6.95212e-10	-0.501965	0.048	0.26	1.333e-05	4.67377e-19	-0.510663	0.094	0.329	8.96149e-15	6.95212e-10	9.34754e-19
Igfbp5	7.46909e-05	-0.700513	0.411	0.534	1	5.13455e-19	-1.00702	0.364	0.582	9.84499e-15	7.46909e-05	1.02691e-18
Rangap1	1.28794e-11	-0.281406	0.065	0.326	2.4695e-07	5.29278e-19	-0.278704	0.161	0.418	1.01484e-14	1.28794e-11	1.05856e-18
Dlk1	0.00187361	-0.463476	0.226	0.357	1	5.41479e-19	-1.28156	0.264	0.522	1.03823e-14	0.00187361	1.08296e-18
Rrm1	3.79876e-09	-0.295687	0.179	0.411	7.28375e-05	7.43645e-19	-0.301213	0.248	0.51	1.42586e-14	3.79876e-09	1.48729e-18
Hist1h1b	3.72945e-11	-1.1173	0.137	0.392	7.15085e-07	7.78282e-19	-1.1321	0.197	0.431	1.49228e-14	3.72945e-11	1.55656e-18
Mcm5	1.52279e-09	-0.311608	0.155	0.393	2.9198e-05	8.70358e-19	-0.324587	0.224	0.482	1.66882e-14	1.52279e-09	1.74072e-18
Fbxo5	4.10823e-09	-0.333937	0.065	0.272	7.87713e-05	1.05747e-18	-0.342577	0.091	0.319	2.02759e-14	4.10823e-09	2.11494e-18
Hirip3	1.37773e-11	-0.329525	0.173	0.454	2.64166e-07	1.18327e-18	-0.313538	0.242	0.498	2.26881e-14	1.37773e-11	2.36655e-18
Spc25	2.70252e-10	-0.477869	0.155	0.389	5.18181e-06	1.19311e-18	-0.48768	0.185	0.416	2.28766e-14	2.70252e-10	2.38621e-18
Zfp36l1	6.32299e-12	0.303425	0.958	0.887	1.21237e-07	1.19933e-18	0.295704	0.948	0.922	2.29959e-14	6.32299e-12	2.39866e-18
Mis18bp1	1.14213e-09	-0.250619	0.024	0.225	2.18993e-05	1.64751e-18	-0.269172	0.042	0.26	3.15893e-14	1.14213e-09	3.29501e-18
Tubb4b	2.04172e-11	-0.810945	0.565	0.752	3.9148e-07	1.89298e-18	-0.632838	0.703	0.849	3.62961e-14	2.04172e-11	3.78597e-18
Acaa2	3.03658e-10	0.273514	0.899	0.8	5.82233e-06	2.24642e-18	0.250414	0.888	0.822	4.30729e-14	3.03658e-10	4.49284e-18
Id4	9.25037e-05	-0.34024	0.179	0.318	1	2.47173e-18	-0.379496	0.067	0.29	4.7393e-14	9.25037e-05	4.94347e-18
Nop58	1.35386e-14	-0.389569	0.542	0.793	2.59589e-10	3.15962e-18	-0.278788	0.658	0.835	6.05826e-14	1.35386e-14	6.31924e-18
Wwc2	3.05969e-13	0.311705	0.786	0.599	5.86665e-09	4.91012e-18	0.262438	0.742	0.638	9.41467e-14	3.05969e-13	9.82024e-18
Prc1	2.83904e-09	-0.566851	0.071	0.277	5.44357e-05	5.21854e-18	-0.562422	0.1	0.322	1.0006e-13	2.83904e-09	1.04371e-17
Col23a1	6.26584e-08	-0.284351	0.048	0.226	0.00120141	5.93287e-18	-0.338384	0.048	0.262	1.13757e-13	6.26584e-08	1.18657e-17
Smarca1	8.46478e-08	0.310378	0.649	0.542	0.00162304	7.44767e-18	0.301663	0.691	0.583	1.42802e-13	8.46478e-08	1.48953e-17
Kcnq1ot1	4.97392e-10	-0.462123	0.714	0.89	9.53699e-06	7.56803e-18	-0.43757	0.845	0.935	1.45109e-13	4.97392e-10	1.51361e-17
Klf6	1.51236e-11	0.39021	0.631	0.464	2.8998e-07	8.65456e-18	0.390529	0.645	0.5	1.65943e-13	1.51236e-11	1.73091e-17
Rrm2	8.94853e-10	-0.3288	0.065	0.283	1.71579e-05	1.45179e-17	-0.327623	0.109	0.343	2.78367e-13	8.94853e-10	2.90358e-17
Fabp5	9.25902e-09	0.890337	0.679	0.555	0.000177532	1.79942e-17	0.544151	0.748	0.631	3.45021e-13	9.25902e-09	3.59884e-17
Pimreg	1.70874e-09	-0.270151	0.024	0.223	3.27634e-05	1.98914e-17	-0.298366	0.055	0.269	3.81398e-13	1.70874e-09	3.97828e-17
Ablim1	2.17671e-17	0.360657	0.429	0.179	4.17363e-13	1.11254e-16	0.255669	0.409	0.233	2.13319e-12	1.11254e-16	4.35343e-17
Dek	3.71656e-09	-0.429559	0.839	0.884	7.12614e-05	2.1875e-17	-0.414177	0.861	0.912	4.19432e-13	3.71656e-09	4.37501e-17
Eln	5.56792e-09	0.519352	0.47	0.311	0.000106759	2.73908e-17	0.397321	0.536	0.365	5.2519e-13	5.56792e-09	5.47815e-17
Etl4	5.10405e-05	0.281824	0.53	0.437	0.97865	3.72606e-17	0.33968	0.603	0.458	7.14434e-13	5.10405e-05	7.45211e-17
Hnrnpdl	1.34981e-07	-0.253214	0.738	0.887	0.00258812	4.15215e-17	-0.268048	0.83	0.914	7.96134e-13	1.34981e-07	8.30431e-17
Prss23	1.83821e-10	0.312849	0.339	0.161	3.52459e-06	4.79745e-17	0.265927	0.33	0.16	9.19862e-13	1.83821e-10	9.59489e-17
Leprot	1.56694e-06	0.270876	0.637	0.539	0.0300444	5.59338e-17	0.254136	0.706	0.616	1.07248e-12	1.56694e-06	1.11868e-16
Nusap1	2.04297e-09	-0.615307	0.089	0.301	3.9172e-05	6.1025e-17	-0.579038	0.118	0.332	1.17009e-12	2.04297e-09	1.2205e-16
Bex2	1.44962e-07	-0.283241	0.042	0.213	0.0027795	1.27468e-16	-0.302399	0.061	0.268	2.44407e-12	1.44962e-07	2.54936e-16
Pltp	0.000353867	0.260223	0.345	0.252	1	1.73724e-16	0.3525	0.436	0.267	3.33098e-12	0.000353867	3.47448e-16
Glipr2	3.54669e-11	0.320598	0.69	0.509	6.80042e-07	2.06116e-16	0.282144	0.655	0.53	3.95207e-12	3.54669e-11	4.12232e-16
Lsm6	5.78636e-10	-0.2904	0.524	0.729	1.10948e-05	2.29948e-16	-0.256261	0.624	0.804	4.40902e-12	5.78636e-10	4.59896e-16
Kif11	1.0373e-09	-0.287574	0.03	0.236	1.98893e-05	2.61555e-16	-0.275979	0.052	0.25	5.01506e-12	1.0373e-09	5.23111e-16
Tmem109	8.3357e-07	0.255224	0.542	0.452	0.0159829	3.80165e-16	0.299186	0.636	0.528	7.28929e-12	8.3357e-07	7.60331e-16
Egflam	8.08351e-11	0.274828	0.494	0.302	1.54993e-06	7.80785e-16	0.292698	0.509	0.352	1.49708e-11	8.08351e-11	1.56157e-15
Mgp	6.19595e-08	1.16679	0.786	0.725	0.00118801	9.07953e-16	1.19563	0.773	0.731	1.74091e-11	6.19595e-08	1.81591e-15
Fbl	3.67018e-08	-0.251009	0.661	0.811	0.00070372	1.09893e-15	-0.260899	0.688	0.845	2.10709e-11	3.67018e-08	2.19786e-15
Pid1	1.74695e-09	0.427707	0.637	0.496	3.3496e-05	1.19299e-15	0.321914	0.652	0.49	2.28744e-11	1.74695e-09	2.38599e-15
Hells	1.13974e-08	-0.291942	0.125	0.341	0.000218534	1.9203e-15	-0.279889	0.182	0.414	3.68199e-11	1.13974e-08	3.8406e-15
Tubb5	1.66002e-07	-0.351356	0.994	0.998	0.00318293	2.07217e-15	-0.319036	0.997	0.998	3.97319e-11	1.66002e-07	4.14435e-15
Dut	1.14085e-07	-0.324815	0.464	0.638	0.00218746	2.39592e-15	-0.341146	0.521	0.7	4.59393e-11	1.14085e-07	4.79183e-15
Lsm2	3.00391e-07	-0.271688	0.488	0.647	0.00575969	3.74907e-15	-0.286814	0.564	0.735	7.18847e-11	3.00391e-07	7.49815e-15
Hist1h1e	8.61363e-08	-0.58619	0.411	0.614	0.00165158	4.57484e-15	-0.60413	0.421	0.615	8.7718e-11	8.61363e-08	9.14969e-15
Aprt	2.12045e-08	-0.317978	0.845	0.882	0.000406575	5.30609e-15	-0.324115	0.788	0.895	1.01739e-10	2.12045e-08	1.06122e-14
Ptn	4.65266e-07	0.398243	0.964	0.938	0.00892102	6.7657e-15	0.412595	0.967	0.949	1.29726e-10	4.65266e-07	1.35314e-14
H2afv	1.85932e-14	-0.3815	0.94	0.978	3.56506e-10	8.2198e-15	-0.267393	0.982	0.981	1.57606e-10	1.85932e-14	1.64396e-14
Ckap2	1.16956e-07	-0.254588	0.065	0.248	0.00224252	8.71277e-15	-0.259281	0.097	0.299	1.67059e-10	1.16956e-07	1.74255e-14
F2r	8.83444e-15	0.456712	0.673	0.464	1.69392e-10	3.54476e-14	0.317605	0.6	0.474	6.79672e-10	3.54476e-14	1.76689e-14
Dhrs3	1.59714e-14	0.38637	0.768	0.595	3.06237e-10	9.54542e-12	0.289259	0.639	0.532	1.83024e-07	9.54542e-12	3.19429e-14
Golga7	5.33695e-12	0.330972	0.738	0.602	1.02331e-07	1.68121e-14	0.274166	0.739	0.694	3.22355e-10	5.33695e-12	3.36241e-14
Spry1	7.66737e-10	0.384791	0.696	0.595	1.47014e-05	1.96451e-14	0.339605	0.703	0.592	3.76674e-10	7.66737e-10	3.92901e-14
Spag9	1.4634e-06	0.252275	0.732	0.688	0.0280593	2.22884e-14	0.268596	0.758	0.701	4.27357e-10	1.4634e-06	4.45768e-14
Col6a3	4.69241e-09	0.317165	0.756	0.605	8.99723e-05	2.38439e-14	0.261617	0.767	0.64	4.57184e-10	4.69241e-09	4.76879e-14
Selenbp1	8.6996e-06	0.296326	0.5	0.398	0.166806	2.56891e-14	0.295717	0.53	0.406	4.92563e-10	8.6996e-06	5.13782e-14
Fndc3a	1.23258e-10	0.353374	0.708	0.592	2.36336e-06	2.74836e-14	0.254605	0.7	0.585	5.26971e-10	1.23258e-10	5.49673e-14
Smc4	1.57175e-07	-0.544455	0.458	0.614	0.00301368	3.17405e-14	-0.527803	0.509	0.658	6.08592e-10	1.57175e-07	6.3481e-14
Anxa3	6.94008e-08	0.283513	0.381	0.227	0.00133069	3.99849e-14	0.265549	0.406	0.247	7.6667e-10	6.94008e-08	7.99697e-14
Kcnj8	1.81676e-08	0.338231	0.756	0.586	0.000348346	4.68356e-14	0.359432	0.585	0.428	8.98025e-10	1.81676e-08	9.36711e-14
Pfn2	1.20791e-07	-0.580623	0.28	0.497	0.00231605	5.49684e-14	-0.506728	0.336	0.57	1.05396e-09	1.20791e-07	1.09937e-13
Mfap4	1.29623e-07	0.680784	0.768	0.716	0.00248538	8.20565e-14	0.595142	0.842	0.765	1.57335e-09	1.29623e-07	1.64113e-13
Nav3	1.13694e-07	-0.253374	0.024	0.186	0.00217996	1.25207e-13	-0.278308	0.073	0.251	2.40072e-09	1.13694e-07	2.50414e-13
Rnaseh2c	8.05267e-13	-0.368629	0.518	0.762	1.54402e-08	3.24743e-13	-0.253957	0.652	0.785	6.22662e-09	8.05267e-13	6.49486e-13
Bub3	4.72996e-06	-0.281717	0.494	0.657	0.0906923	4.06917e-13	-0.309723	0.561	0.738	7.80223e-09	4.72996e-06	8.13834e-13
Tbx2	3.52829e-06	-0.31132	0.369	0.547	0.0676514	4.38488e-13	-0.33355	0.315	0.513	8.40757e-09	3.52829e-06	8.76976e-13
Cdkn1c	4.35226e-07	-1.02328	0.935	0.979	0.00834503	4.67698e-13	-0.963757	0.976	0.993	8.96764e-09	4.35226e-07	9.35396e-13
Lig1	1.0201e-05	-0.305922	0.268	0.433	0.195593	4.91557e-13	-0.318705	0.294	0.508	9.42511e-09	1.0201e-05	9.83113e-13
Loxl2	1.11178e-12	0.321972	0.726	0.499	2.13172e-08	3.05878e-11	0.25307	0.645	0.542	5.86491e-07	3.05878e-11	2.22356e-12
Gas6	8.65736e-05	-0.415991	0.173	0.308	1	1.55206e-12	-0.45232	0.191	0.377	2.97591e-08	8.65736e-05	3.10411e-12
Klf2	0.043053	0.327684	0.446	0.409	1	1.96667e-12	0.389965	0.548	0.406	3.77089e-08	0.043053	3.93334e-12
Tril	2.16884e-07	0.270458	0.851	0.75	0.00415852	3.14413e-12	0.251982	0.839	0.788	6.02856e-08	2.16884e-07	6.28826e-12
Spats2l	1.49765e-11	0.378834	0.69	0.521	2.8716e-07	2.02521e-08	0.267875	0.652	0.6	0.000388313	2.02521e-08	2.99531e-11
Vcan	1.38545e-05	-0.263981	0.292	0.494	0.265646	1.99171e-11	-0.341139	0.379	0.575	3.8189e-07	1.38545e-05	3.98341e-11
Ypel3	6.5289e-10	0.312782	0.78	0.663	1.25185e-05	2.21104e-11	0.251139	0.718	0.666	4.23944e-07	6.5289e-10	4.42207e-11
Jpt1	6.65226e-07	-0.346375	0.577	0.729	0.012755	7.42877e-11	-0.333305	0.694	0.813	1.42439e-06	6.65226e-07	1.48575e-10
Zfp503	9.54998e-11	0.346389	0.78	0.632	1.83111e-06	5.45733e-10	0.255621	0.761	0.712	1.04639e-05	5.45733e-10	1.91e-10
Cst3	2.94399e-05	0.407973	0.94	0.93	0.564481	1.39308e-09	0.49518	0.948	0.959	2.6711e-05	2.94399e-05	2.78617e-09
Tmpo	3.52562e-06	-0.310108	0.589	0.7	0.0676002	2.54309e-09	-0.256358	0.648	0.753	4.87611e-05	3.52562e-06	5.08617e-09
Cyr61	4.49802e-05	0.304045	0.714	0.643	0.86245	2.84944e-09	0.35497	0.706	0.608	5.46351e-05	4.49802e-05	5.69887e-09
Hist1h4d	1.11957e-08	-0.403874	0.173	0.393	0.000214666	4.63176e-09	-0.346468	0.248	0.404	8.88094e-05	1.11957e-08	9.26352e-09
Ckb	0.158129	-0.397058	0.53	0.586	1	1.9599e-08	-0.510668	0.47	0.619	0.000375791	0.158129	3.9198e-08
Wnt4	8.97686e-05	-0.501714	0.077	0.199	1	2.07345e-07	-0.356647	0.091	0.206	0.00397563	8.97686e-05	4.1469e-07
Itm2a	0.144551	-0.28163	0.28	0.362	1	2.55945e-07	-0.965513	0.342	0.495	0.00490748	0.144551	5.11889e-07
Arl6ip1	0.00349297	-0.497484	0.524	0.638	1	4.54527e-07	-0.492948	0.539	0.668	0.0087151	0.00349297	9.09054e-07
Nts	0.000420553	-0.852152	0.024	0.11	1	5.61816e-07	-0.764606	0.03	0.121	0.0107723	0.000420553	1.12363e-06
Myh11	8.87492e-05	-0.980339	0.054	0.167	1	8.93708e-07	-0.936979	0.082	0.186	0.0171359	8.87492e-05	1.78741e-06
Smoc2	0.0219058	-0.28574	0.107	0.172	1	6.90778e-06	-0.333222	0.155	0.263	0.13245	0.0219058	1.38155e-05
Cnn1	0.00798691	-0.411297	0.048	0.113	1	2.39061e-05	-0.417004	0.039	0.113	0.458376	0.00798691	4.78117e-05
Ltbp1	0.000107299	0.26187	0.315	0.204	1	0.0119963	0.282628	0.294	0.26	1	0.0119963	0.000214587
Ptp4a3	0.0547429	-0.494476	0.244	0.325	1	0.0002101	-0.275864	0.227	0.345	1	0.0547429	0.000420156
Mylk	0.0983826	-0.368503	0.845	0.812	1	0.000387736	-0.392713	0.852	0.811	1	0.0983826	0.000775321
Cox4i2	0.0431828	-0.255399	0.286	0.369	1	0.00154748	-0.279709	0.194	0.272	1	0.0431828	0.00309256
Dkk2	0.00179213	-0.531793	0.143	0.247	1	0.0128264	-0.364683	0.206	0.26	1	0.0128264	0.00358105
Palld	0.143728	-0.32494	0.411	0.44	1	0.0194151	-0.346372	0.473	0.492	1	0.143728	0.0384533

## Sheet: Stroma_Subcluster.5.Mut.CTRL.m
Gene	CTRL_p_val	CTRL_avg_logFC	CTRL_pct.1	CTRL_pct.2	CTRL_p_val_adj	Mutant_p_val	Mutant_avg_logFC	Mutant_pct.1	Mutant_pct.2	Mutant_p_val_adj	max_pval	minimump_p_val
Scx	6.2937e-61	0.559507	0.497	0.067	1.20675e-56	3.51418e-141	0.821635	0.681	0.099	6.73809e-137	6.2937e-61	7.02836e-141
Aldh1a2	9.0034e-65	1.05946	0.973	0.444	1.72631e-60	6.82209e-122	1.18512	0.996	0.487	1.30807e-117	9.0034e-65	1.36442e-121
Crabp2	1.42984e-67	0.676251	0.591	0.092	2.74158e-63	2.95408e-113	0.79383	0.728	0.16	5.66416e-109	1.42984e-67	5.90817e-113
Foxd1	1.00159e-47	0.896868	0.826	0.331	1.92045e-43	1.47373e-102	1.03742	0.962	0.372	2.82573e-98	1.00159e-47	2.94746e-102
Ntn1	7.53155e-47	0.492053	0.436	0.069	1.4441e-42	1.25925e-97	0.60511	0.54	0.089	2.41448e-93	7.53155e-47	2.51849e-97
Zeb2	1.51029e-57	-1.43374	0.356	0.913	2.89583e-53	9.01533e-96	-1.61833	0.234	0.884	1.7286e-91	1.51029e-57	1.80307e-95
Cadm1	1.6115e-74	0.684168	0.685	0.116	3.08988e-70	1.78199e-94	0.622897	0.664	0.15	3.41678e-90	1.6115e-74	3.56398e-94
Igfbp5	1.13153e-49	1.20744	0.946	0.473	2.16959e-45	2.39645e-93	1.3806	0.966	0.518	4.59495e-89	1.13153e-49	4.79289e-93
Gdnf	4.22999e-44	0.565116	0.638	0.175	8.11059e-40	2.32023e-90	0.577952	0.74	0.202	4.44882e-86	4.22999e-44	4.64047e-90
Mecom	9.6582e-47	0.774445	0.94	0.471	1.85186e-42	5.592e-86	0.82062	0.949	0.427	1.07221e-81	9.6582e-47	1.1184e-85
Col4a4	1.98096e-31	0.421718	0.456	0.117	3.7983e-27	1.37054e-85	0.492643	0.549	0.105	2.62788e-81	1.98096e-31	2.74108e-85
Tmsb4x	2.02269e-55	-1.20107	1	0.999	3.8783e-51	8.50051e-79	-1.1656	1	1	1.62989e-74	2.02269e-55	1.7001e-78
Igfbp6	1.65335e-45	0.760835	0.436	0.071	3.17014e-41	7.75743e-71	0.67794	0.549	0.122	1.48741e-66	1.65335e-45	1.55149e-70
Fibin	6.76128e-54	0.912657	0.839	0.294	1.29641e-49	2.48453e-69	0.736828	0.843	0.344	4.76383e-65	6.76128e-54	4.96905e-69
Tuba1a	2.47417e-31	-0.824798	0.859	0.951	4.74398e-27	9.89465e-68	-0.950235	0.864	0.972	1.8972e-63	2.47417e-31	1.97893e-67
Aprt	1.77923e-43	0.7347	1	0.865	3.4115e-39	8.26273e-66	0.713181	0.991	0.872	1.5843e-61	1.77923e-43	1.65255e-65
Mest	1.39265e-43	0.806059	1	0.845	2.67027e-39	7.94173e-65	0.684954	1	0.927	1.52275e-60	1.39265e-43	1.58835e-64
Adgrl2	9.0913e-41	0.661877	0.805	0.368	1.74317e-36	2.3211e-61	0.663755	0.838	0.422	4.45048e-57	9.0913e-41	4.6422e-61
Vim	5.28603e-30	-0.695383	1	0.998	1.01354e-25	1.28551e-60	-0.776049	1	0.998	2.46484e-56	5.28603e-30	2.57102e-60
Reln	1.15985e-34	0.363755	0.644	0.195	2.22389e-30	1.2751e-59	0.439536	0.647	0.202	2.44488e-55	1.15985e-34	2.55021e-59
Col4a1	5.24751e-38	-1.15032	0.664	0.908	1.00616e-33	1.36183e-59	-1.20267	0.681	0.903	2.61118e-55	5.24751e-38	2.72366e-59
Npm1	7.18856e-29	0.327626	1	1	1.37833e-24	5.33974e-58	0.36965	1	0.999	1.02384e-53	7.18856e-29	1.06795e-57
Bgn	2.09636e-28	-0.732883	0.671	0.913	4.01957e-24	1.54391e-54	-0.835115	0.766	0.938	2.96028e-50	2.09636e-28	3.08781e-54
Cldn1	5.21985e-29	0.342425	0.362	0.076	1.00085e-24	1.00686e-53	0.37051	0.409	0.086	1.93056e-49	5.21985e-29	2.01372e-53
Pbx1	1.86625e-26	0.535981	1	0.933	3.57835e-22	1.08093e-53	0.593777	0.996	0.942	2.07257e-49	1.86625e-26	2.16185e-53
Lbhd2	6.99177e-32	0.476415	0.537	0.161	1.3406e-27	1.18384e-53	0.451076	0.609	0.193	2.26989e-49	6.99177e-32	2.36767e-53
Ccnd2	7.11393e-30	0.570931	1	0.886	1.36402e-25	1.04726e-50	0.581443	0.991	0.906	2.00802e-46	7.11393e-30	2.09453e-50
Lgals1	2.36949e-28	-0.599086	0.987	0.992	4.54327e-24	1.33717e-50	-0.660528	1	0.995	2.56388e-46	2.36949e-28	2.67433e-50
Col4a2	7.49417e-28	-0.831888	0.523	0.822	1.43693e-23	2.53183e-50	-0.909542	0.481	0.824	4.85453e-46	7.49417e-28	5.06366e-50
Ptgis	1.28893e-23	0.542298	0.812	0.523	2.47139e-19	6.46247e-49	0.517208	0.889	0.528	1.23911e-44	1.28893e-23	1.29249e-48
Col14a1	4.11107e-26	-1.00957	0.04	0.51	7.88256e-22	3.44798e-48	-1.1632	0.072	0.59	6.61116e-44	4.11107e-26	6.89596e-48
Fbln1	5.46784e-25	-0.746512	0.738	0.9	1.0484e-20	9.18226e-48	-0.806042	0.753	0.913	1.76061e-43	5.46784e-25	1.83645e-47
Bok	1.52113e-25	-0.729263	0.107	0.575	2.91661e-21	1.84279e-46	-0.758684	0.145	0.626	3.53337e-42	1.52113e-25	3.68558e-46
C1qtnf4	3.33358e-33	0.445696	0.564	0.182	6.3918e-29	3.36868e-46	0.41532	0.609	0.223	6.4591e-42	3.33358e-33	6.73736e-46
Sertad4	3.26396e-19	0.374024	0.658	0.33	6.25831e-15	4.36379e-46	0.428547	0.74	0.342	8.36714e-42	3.26396e-19	8.72759e-46
Sub1	1.74803e-33	0.410778	0.993	0.992	3.35166e-29	5.95236e-46	0.392323	1	0.994	1.14131e-41	1.74803e-33	1.19047e-45
Rpl12	1.83197e-23	0.252454	1	0.998	3.51263e-19	7.05104e-46	0.269936	1	1	1.35197e-41	1.83197e-23	1.41021e-45
Shisa3	1.56833e-25	0.54053	0.772	0.363	3.00711e-21	1.66949e-45	0.552125	0.834	0.415	3.20107e-41	1.56833e-25	3.33897e-45
Polr2m	2.38413e-13	0.293086	0.96	0.918	4.57133e-09	1.04295e-44	0.426882	0.996	0.938	1.99974e-40	2.38413e-13	2.08589e-44
Sparc	5.83706e-31	-0.984775	0.98	0.988	1.1192e-26	3.88728e-44	-1.01319	1	0.996	7.45347e-40	5.83706e-31	7.77455e-44
Slco3a1	1.85041e-13	0.273687	0.436	0.194	3.54797e-09	5.27537e-43	0.449278	0.553	0.2	1.0115e-38	1.85041e-13	1.05507e-42
Meis2	1.29136e-29	0.519856	1	0.947	2.47606e-25	6.10898e-43	0.494623	0.996	0.931	1.17134e-38	1.29136e-29	1.2218e-42
Tpd52l1	7.05287e-24	0.315663	0.403	0.115	1.35232e-19	7.02242e-43	0.33972	0.489	0.156	1.34648e-38	7.05287e-24	1.40448e-42
Pkm	9.55755e-21	0.395751	1	0.978	1.83257e-16	1.31714e-42	0.47471	1	0.963	2.52548e-38	9.55755e-21	2.63427e-42
Aox3	1.22766e-27	0.278788	0.315	0.058	2.35392e-23	2.3217e-42	0.252393	0.345	0.077	4.45163e-38	1.22766e-27	4.6434e-42
Gucy1a1	9.21128e-30	-0.854954	0.765	0.906	1.76617e-25	6.257e-41	-0.828604	0.566	0.827	1.19972e-36	9.21128e-30	1.2514e-40
Col6a2	4.88927e-16	-0.70101	0.45	0.684	9.37469e-12	2.30422e-40	-0.907775	0.417	0.758	4.41812e-36	4.88927e-16	4.60844e-40
Zbtb7c	2.78934e-26	0.278323	0.369	0.087	5.34828e-22	2.97189e-40	0.298442	0.409	0.108	5.6983e-36	2.78934e-26	5.94377e-40
Col3a1	2.57298e-17	-0.867981	0.993	0.936	4.93343e-13	4.43853e-40	-1.1201	0.979	0.969	8.51045e-36	2.57298e-17	8.87707e-40
Ppp1r14a	8.2095e-32	-1.02788	0.322	0.733	1.57409e-27	1.47278e-39	-0.697606	0.119	0.586	2.82391e-35	8.2095e-32	2.94556e-39
Col6a1	2.95294e-18	-0.738901	0.423	0.695	5.66197e-14	1.57657e-39	-0.906544	0.421	0.762	3.02291e-35	2.95294e-18	3.15313e-39
Col1a2	9.69289e-16	-0.792503	0.993	0.971	1.85851e-11	1.72796e-39	-1.06776	0.987	0.983	3.31318e-35	9.69289e-16	3.45591e-39
Tgfbi	6.47069e-19	0.40277	0.933	0.666	1.24069e-14	1.35285e-38	0.452339	0.966	0.679	2.59396e-34	6.47069e-19	2.7057e-38
Ace2	3.02546e-27	-0.92797	0.06	0.538	5.80102e-23	3.37867e-38	-0.905958	0.072	0.517	6.47825e-34	3.02546e-27	6.75733e-38
Pmp22	8.04203e-13	-0.45883	0.329	0.6	1.54198e-08	3.65103e-37	-0.664543	0.264	0.672	7.00049e-33	8.04203e-13	7.30207e-37
Acta2	1.28934e-19	-2.00421	0.691	0.842	2.47219e-15	5.46955e-37	-2.04611	0.74	0.874	1.04873e-32	1.28934e-19	1.09391e-36
Hnrnpa1	8.56609e-13	0.255329	0.993	0.989	1.64246e-08	9.3486e-37	0.346942	1	0.983	1.7925e-32	8.56609e-13	1.86972e-36
Gsta4	6.2636e-19	0.439289	0.846	0.651	1.20098e-14	1.66377e-36	0.48372	0.877	0.605	3.19012e-32	6.2636e-19	3.32755e-36
Dlc1	8.50856e-28	-0.620828	0.349	0.782	1.63143e-23	2.20297e-36	-0.549736	0.409	0.77	4.22398e-32	8.50856e-28	4.40594e-36
Tagln2	4.16082e-23	-0.643663	0.664	0.856	7.97796e-19	2.26898e-36	-0.643733	0.694	0.864	4.35053e-32	4.16082e-23	4.53795e-36
CT025619.1	6.12193e-26	0.435571	0.611	0.257	1.17382e-21	6.76559e-36	0.419206	0.681	0.332	1.29723e-31	6.12193e-26	1.35312e-35
Ncam1	2.49912e-14	-0.779827	0.456	0.686	4.7918e-10	6.76873e-36	-0.809765	0.421	0.748	1.29784e-31	2.49912e-14	1.35375e-35
Tgfb1i1	4.46511e-17	-0.538248	0.443	0.745	8.56141e-13	1.14847e-35	-0.568964	0.485	0.797	2.20207e-31	4.46511e-17	2.29694e-35
Mdk	1.27079e-21	0.315144	1	0.983	2.43661e-17	1.24705e-35	0.318169	1	0.99	2.39109e-31	1.27079e-21	2.4941e-35
Pcolce	3.12958e-17	-0.614561	0.51	0.75	6.00065e-13	2.69165e-35	-0.691915	0.553	0.802	5.16096e-31	3.12958e-17	5.38329e-35
Fbxl7	2.61853e-12	0.37017	0.819	0.601	5.02078e-08	3.21973e-35	0.550452	0.902	0.687	6.17351e-31	2.61853e-12	6.43946e-35
Acot1	5.68892e-17	0.378825	0.664	0.389	1.09079e-12	6.1187e-35	0.408445	0.766	0.44	1.1732e-30	5.68892e-17	1.22374e-34
Dcn	2.63353e-15	-1.80659	0.282	0.575	5.04952e-11	7.75461e-35	-2.10192	0.391	0.701	1.48687e-30	2.63353e-15	1.55092e-34
S100a6	4.05721e-15	-0.655265	0.651	0.857	7.77929e-11	1.23217e-34	-0.837482	0.728	0.888	2.36256e-30	4.05721e-15	2.46434e-34
Palld	7.15495e-18	-0.822286	0.107	0.473	1.37189e-13	2.76469e-34	-0.835168	0.111	0.525	5.30102e-30	7.15495e-18	5.52939e-34
Gng11	5.59058e-25	-0.798628	0.456	0.799	1.07194e-20	4.62712e-34	-0.677742	0.481	0.773	8.87204e-30	5.59058e-25	9.25424e-34
Tpm2	1.79582e-22	-1.10452	0.846	0.954	3.4433e-18	1.00509e-33	-0.985238	0.864	0.941	1.92716e-29	1.79582e-22	2.01018e-33
Tagln	2.32135e-11	-1.78744	0.315	0.527	4.45096e-07	2.59197e-33	-1.78287	0.157	0.549	4.96984e-29	2.32135e-11	5.18394e-33
Dhrs3	1.72896e-22	0.479922	0.866	0.587	3.31511e-18	3.46641e-33	0.443645	0.813	0.52	6.6465e-29	1.72896e-22	6.93283e-33
G0s2	8.8142e-21	-1.05524	0.356	0.684	1.69004e-16	1.22909e-32	-0.859365	0.226	0.612	2.35665e-28	8.8142e-21	2.45817e-32
Alcam	2.16157e-30	0.67363	0.98	0.751	4.14459e-26	5.06329e-32	0.521971	0.97	0.791	9.70834e-28	2.16157e-30	1.01266e-31
Ptgr1	5.17297e-32	0.542696	0.698	0.299	9.91865e-28	2.96467e-29	0.413623	0.668	0.382	5.68445e-25	2.96467e-29	1.03459e-31
Csrp2	8.89686e-15	-0.669214	0.678	0.851	1.70588e-10	5.58695e-32	-0.770536	0.706	0.883	1.07124e-27	8.89686e-15	1.11739e-31
Gxylt2	5.93884e-23	0.306641	0.369	0.099	1.13871e-18	6.53759e-32	0.295615	0.43	0.142	1.25352e-27	5.93884e-23	1.30752e-31
Ybx3	2.42878e-15	0.375618	0.966	0.799	4.65694e-11	7.94312e-32	0.398112	0.966	0.838	1.52301e-27	2.42878e-15	1.58862e-31
Csrp1	2.01864e-19	-0.622586	0.611	0.817	3.87053e-15	1.20654e-31	-0.618914	0.596	0.835	2.31343e-27	2.01864e-19	2.41309e-31
Ptgs1	7.64318e-17	0.260297	0.389	0.141	1.4655e-12	1.31259e-31	0.265613	0.443	0.156	2.51675e-27	7.64318e-17	2.62517e-31
Isyna1	2.35228e-11	0.296884	0.819	0.602	4.51027e-07	3.43998e-31	0.403651	0.889	0.66	6.59581e-27	2.35228e-11	6.87996e-31
Rem1	8.77473e-18	-0.457317	0.275	0.644	1.68247e-13	4.0673e-31	-0.467716	0.247	0.618	7.79864e-27	8.77473e-18	8.1346e-31
Ndufa4l2	4.06863e-31	-1.20295	0.195	0.686	7.8012e-27	8.63003e-30	-1.01233	0.183	0.555	1.65472e-25	8.63003e-30	8.13727e-31
Slc40a1	5.99009e-19	0.384507	0.591	0.286	1.14854e-14	1.46248e-30	0.405285	0.609	0.294	2.80415e-26	5.99009e-19	2.92495e-30
Rpl22l1	1.33098e-21	0.281808	1	0.992	2.55202e-17	1.60299e-30	0.258861	1	0.992	3.07358e-26	1.33098e-21	3.20599e-30
Tpm1	1.39712e-19	-0.999082	0.846	0.928	2.67883e-15	1.74233e-30	-0.908717	0.898	0.941	3.34073e-26	1.39712e-19	3.48465e-30
Rspo3	2.1434e-19	0.655307	0.423	0.153	4.10976e-15	1.78038e-30	0.479824	0.468	0.173	3.41371e-26	2.1434e-19	3.56076e-30
Gpi1	1.07565e-13	0.34298	0.926	0.864	2.06246e-09	1.93015e-30	0.396111	0.949	0.842	3.70087e-26	1.07565e-13	3.8603e-30
Itga8	6.3588e-20	-0.532467	0.121	0.533	1.21924e-15	3.9548e-30	-0.466735	0.089	0.485	7.58294e-26	6.3588e-20	7.9096e-30
Calm1	6.60683e-21	-0.469011	0.94	0.99	1.26679e-16	7.95706e-30	-0.393762	0.979	0.998	1.52569e-25	6.60683e-21	1.59141e-29
Adamts5	2.66903e-23	0.410581	0.644	0.277	5.1176e-19	9.5511e-30	0.363711	0.634	0.306	1.83133e-25	2.66903e-23	1.91022e-29
Hic1	1.0376e-13	0.341388	0.839	0.636	1.9895e-09	1.79223e-29	0.424919	0.902	0.697	3.43641e-25	1.0376e-13	3.58445e-29
Ldhb	9.83851e-16	0.311885	0.953	0.806	1.88644e-11	3.04693e-29	0.365631	0.962	0.776	5.84218e-25	9.83851e-16	6.09386e-29
Ctsh	8.62482e-23	0.331201	0.336	0.084	1.65372e-18	4.98032e-29	0.30998	0.404	0.141	9.54927e-25	8.62482e-23	9.96065e-29
Tubb2a	1.07308e-06	-0.255077	0.208	0.407	0.0205752	5.23192e-29	-0.452796	0.174	0.551	1.00317e-24	1.07308e-06	1.04638e-28
Ghr	6.63657e-10	0.279627	0.584	0.375	1.2725e-05	5.38651e-29	0.346003	0.736	0.418	1.03281e-24	6.63657e-10	1.0773e-28
Myh10	8.13644e-14	0.416231	0.946	0.808	1.56008e-09	5.49181e-29	0.520422	0.957	0.832	1.053e-24	8.13644e-14	1.09836e-28
Rhoj	8.69294e-09	-0.308725	0.242	0.472	0.000166678	5.65499e-29	-0.457813	0.196	0.57	1.08429e-24	8.69294e-09	1.131e-28
Tubb6	1.36527e-16	-0.511343	0.154	0.499	2.61776e-12	8.5679e-29	-0.527359	0.264	0.62	1.64281e-24	1.36527e-16	1.71358e-28
Plagl1	9.88045e-25	0.528517	0.872	0.538	1.89448e-20	8.59625e-29	0.322759	0.919	0.629	1.64825e-24	9.88045e-25	1.71925e-28
Gata6	6.03479e-11	-0.316375	0.141	0.425	1.15711e-06	1.07642e-28	-0.44898	0.111	0.493	2.06393e-24	6.03479e-11	2.15285e-28
Meis1	2.37885e-21	0.41247	0.96	0.774	4.56121e-17	1.43341e-28	0.395255	0.923	0.804	2.74842e-24	2.37885e-21	2.86682e-28
Basp1	1.26864e-15	-0.545891	0.886	0.924	2.43248e-11	3.29327e-28	-0.62706	0.97	0.945	6.31452e-24	1.26864e-15	6.58654e-28
Tubb5	5.98331e-14	-0.472587	1	0.998	1.14724e-09	3.3517e-28	-0.457877	0.996	0.998	6.42655e-24	5.98331e-14	6.7034e-28
Itm2b	3.84307e-15	-0.384913	0.993	0.992	7.36871e-11	6.04494e-28	-0.396282	0.983	0.992	1.15906e-23	3.84307e-15	1.20899e-27
Phlda1	9.14966e-16	-0.538458	0.094	0.433	1.75436e-11	1.59912e-27	-0.537151	0.077	0.449	3.06615e-23	9.14966e-16	3.19824e-27
Sema5a	3.59912e-13	-0.412	0.168	0.48	6.90096e-09	2.32521e-27	-0.4481	0.136	0.513	4.45836e-23	3.59912e-13	4.65042e-27
Tnnt1	2.63168e-14	0.32403	0.691	0.42	5.04599e-10	2.51951e-27	0.344834	0.715	0.416	4.83091e-23	2.63168e-14	5.03902e-27
Atp2b1	8.4036e-15	-0.690207	0.758	0.873	1.61131e-10	5.61835e-27	-0.628415	0.809	0.902	1.07726e-22	8.4036e-15	1.12367e-26
S100a10	1.23268e-16	-0.654201	0.859	0.905	2.36354e-12	8.98993e-27	-0.704563	0.915	0.932	1.72373e-22	1.23268e-16	1.79799e-26
Pdzd2	1.74122e-13	0.321158	0.597	0.328	3.33861e-09	9.83742e-27	0.378457	0.668	0.386	1.88623e-22	1.74122e-13	1.96748e-26
Vstm4	1.09882e-17	-0.50104	0.228	0.594	2.10687e-13	1.63011e-26	-0.459956	0.289	0.627	3.12557e-22	1.09882e-17	3.26021e-26
Colec12	1.19038e-17	-0.465227	0.315	0.655	2.28243e-13	1.96117e-26	-0.438996	0.345	0.683	3.76035e-22	1.19038e-17	3.92234e-26
Snhg18	6.0888e-10	-0.383671	0.718	0.831	1.16747e-05	2.63923e-26	-0.489215	0.63	0.858	5.06046e-22	6.0888e-10	5.27846e-26
Khdrbs3	6.40286e-10	-0.357727	0.121	0.37	1.22768e-05	4.91499e-26	-0.446243	0.081	0.439	9.42401e-22	6.40286e-10	9.82999e-26
Klhdc10	1.82025e-14	0.302245	0.584	0.317	3.49016e-10	8.94923e-26	0.332195	0.689	0.41	1.71593e-21	1.82025e-14	1.78985e-25
Plcb1	5.8319e-20	-0.539418	0.047	0.44	1.11821e-15	1.73555e-25	-0.410445	0.038	0.386	3.32775e-21	5.8319e-20	3.47111e-25
Tcf21	4.26923e-25	-0.804361	0.57	0.797	8.18582e-21	2.39877e-24	-0.641102	0.515	0.725	4.5994e-20	2.39877e-24	8.53846e-25
Rap2a	4.13663e-14	-0.478187	0.215	0.525	7.93157e-10	5.08419e-25	-0.500934	0.255	0.585	9.74843e-21	4.13663e-14	1.01684e-24
Snx18	6.25775e-13	-0.415091	0.322	0.592	1.19986e-08	6.58392e-25	-0.416148	0.281	0.605	1.2624e-20	6.25775e-13	1.31678e-24
Adamtsl1	7.38373e-18	0.383292	0.584	0.276	1.41576e-13	7.20176e-25	0.435239	0.621	0.336	1.38087e-20	7.38373e-18	1.44035e-24
Creb3l1	2.37627e-07	-0.253464	0.154	0.35	0.00455626	3.18433e-24	-0.378518	0.145	0.489	6.10563e-20	2.37627e-07	6.36865e-24
Id3	1.6537e-07	-0.269505	0.913	0.974	0.0031708	3.63422e-24	-0.502753	0.864	0.954	6.96825e-20	1.6537e-07	7.26843e-24
Cct5	9.1286e-14	0.279893	0.993	0.956	1.75032e-09	6.16815e-24	0.304557	1	0.979	1.18268e-19	9.1286e-14	1.23363e-23
Fn1	2.67648e-10	-0.534951	0.832	0.856	5.13188e-06	9.38567e-24	-0.652655	0.855	0.913	1.79961e-19	2.67648e-10	1.87713e-23
Crip1	1.13607e-13	-0.8353	0.295	0.581	2.17829e-09	1.04326e-23	-0.942492	0.345	0.637	2.00034e-19	1.13607e-13	2.08651e-23
Gpc3	5.68372e-17	0.367566	1	0.973	1.0898e-12	1.58371e-23	0.340056	1	0.972	3.0366e-19	5.68372e-17	3.16742e-23
Glipr2	1.95306e-12	-0.387051	0.275	0.558	3.74479e-08	1.68721e-23	-0.38985	0.238	0.574	3.23506e-19	1.95306e-12	3.37442e-23
Fermt2	1.11166e-20	-0.534931	0.839	0.919	2.13149e-16	1.96094e-23	-0.443819	0.8	0.919	3.7599e-19	1.11166e-20	3.92187e-23
Twist1	2.5474e-20	0.358653	0.779	0.448	4.88438e-16	2.11043e-23	0.307025	0.762	0.478	4.04654e-19	2.5474e-20	4.22086e-23
Peg3	3.37695e-21	0.478841	0.973	0.794	6.47497e-17	2.34798e-23	0.35502	0.983	0.866	4.50202e-19	3.37695e-21	4.69597e-23
Nexn	4.25947e-12	-0.665495	0.208	0.477	8.16712e-08	3.15402e-23	-0.670149	0.179	0.492	6.04752e-19	4.25947e-12	6.30804e-23
Nkain4	4.43113e-11	-0.353542	0.154	0.421	8.49625e-07	3.23329e-23	-0.369185	0.102	0.432	6.19951e-19	4.43113e-11	6.46658e-23
Lox	1.77589e-12	-0.544035	0.107	0.391	3.40509e-08	8.49505e-23	-0.547303	0.077	0.397	1.62884e-18	1.77589e-12	1.69901e-22
Cavin3	2.32861e-10	-0.612489	0.215	0.458	4.46488e-06	1.07025e-22	-0.679386	0.255	0.568	2.0521e-18	2.32861e-10	2.14051e-22
Hacd2	2.46018e-19	0.375227	0.604	0.305	4.71715e-15	1.15313e-22	0.346635	0.626	0.384	2.211e-18	2.46018e-19	2.30625e-22
Dtd1	3.56615e-10	0.27938	0.53	0.328	6.83774e-06	1.2246e-22	0.307195	0.672	0.415	2.34804e-18	3.56615e-10	2.44919e-22
Rras	5.9607e-13	-0.434263	0.396	0.639	1.14291e-08	1.90811e-21	-0.397486	0.332	0.62	3.6586e-17	5.9607e-13	3.81621e-21
Dstn	2.80864e-07	-0.405957	0.94	0.977	0.00538528	2.5475e-21	-0.504881	0.953	0.975	4.88458e-17	2.80864e-07	5.09501e-21
F11r	2.14655e-11	0.251928	0.537	0.297	4.11579e-07	3.65468e-21	0.29086	0.621	0.353	7.00748e-17	2.14655e-11	7.30936e-21
Trps1	8.38343e-12	-0.335976	0.04	0.305	1.60744e-07	7.71235e-21	-0.407214	0.038	0.332	1.47877e-16	8.38343e-12	1.54247e-20
Btg2	4.20438e-11	0.395219	0.852	0.662	8.06148e-07	8.06305e-21	0.465845	0.821	0.62	1.54601e-16	4.20438e-11	1.61261e-20
Col5a1	9.46237e-07	-0.316085	0.403	0.595	0.0181431	8.41265e-21	-0.490153	0.413	0.664	1.61304e-16	9.46237e-07	1.68253e-20
Tbx2	1.34067e-18	-0.579597	0.201	0.563	2.57061e-14	8.73008e-21	-0.438228	0.191	0.517	1.67391e-16	1.34067e-18	1.74602e-20
2022-09-07	1.38605e-18	-0.472864	0.946	0.987	2.65761e-14	9.10163e-21	-0.396401	0.979	0.988	1.74515e-16	1.38605e-18	1.82033e-20
Selenop	8.94639e-11	0.272694	0.765	0.535	1.71538e-06	1.33577e-20	0.330223	0.804	0.58	2.56121e-16	8.94639e-11	2.67154e-20
Itga1	2.0526e-17	-0.639625	0.188	0.54	3.93566e-13	2.99973e-20	-0.529274	0.221	0.517	5.75169e-16	2.0526e-17	5.99946e-20
Epha3	4.71094e-11	-0.304625	0.02	0.262	9.03276e-07	3.34081e-20	-0.37406	0.034	0.325	6.40568e-16	4.71094e-11	6.68163e-20
Rock2	7.70267e-07	-0.260838	0.55	0.742	0.0147691	4.21226e-20	-0.374058	0.511	0.756	8.07659e-16	7.70267e-07	8.42452e-20
Fabp5	1.37043e-12	-0.924811	0.336	0.595	2.62767e-08	6.2886e-20	-0.847378	0.443	0.664	1.20578e-15	1.37043e-12	1.25772e-19
Klf13	8.89042e-11	-0.298984	0.154	0.433	1.70465e-06	8.08355e-20	-0.311075	0.157	0.467	1.54994e-15	8.89042e-11	1.61671e-19
Emid1	7.0612e-11	-0.340041	0.067	0.329	1.35391e-06	9.1373e-20	-0.347434	0.072	0.363	1.75199e-15	7.0612e-11	1.82746e-19
Fhl2	4.6838e-12	0.313234	0.98	0.817	8.98072e-08	1.02113e-19	0.315526	0.953	0.755	1.95792e-15	4.6838e-12	2.04227e-19
Tmsb10	4.48998e-19	-0.362227	1	0.999	8.60908e-15	3.72893e-19	-0.279741	1	0.999	7.14986e-15	4.48998e-19	7.45787e-19
Des	4.54684e-19	-0.642524	0.107	0.488	8.71811e-15	6.84548e-19	-0.385666	0.072	0.352	1.31255e-14	6.84548e-19	9.09368e-19
Gpc6	5.49372e-08	0.335151	0.758	0.618	0.00105337	5.11634e-19	0.299801	0.804	0.568	9.81007e-15	5.49372e-08	1.02327e-18
Crip2	7.2816e-09	-0.490943	0.235	0.463	0.000139617	6.23119e-19	-0.54566	0.26	0.54	1.19477e-14	7.2816e-09	1.24624e-18
Vcam1	1.66937e-09	-0.426507	0.114	0.356	3.20085e-05	8.03054e-19	-0.406563	0.081	0.358	1.53978e-14	1.66937e-09	1.60611e-18
Cldn11	1.56407e-11	-0.519557	0.06	0.32	2.99895e-07	9.22678e-19	-0.52476	0.043	0.311	1.76914e-14	1.56407e-11	1.84536e-18
Bst2	1.3382e-11	-0.500465	0.141	0.427	2.56586e-07	9.40412e-19	-0.420405	0.072	0.354	1.80315e-14	1.3382e-11	1.88082e-18
Golm1	9.63977e-19	0.35372	0.55	0.257	1.84833e-14	5.98165e-16	0.269947	0.54	0.337	1.14692e-11	5.98165e-16	1.92795e-18
Lum	2.83211e-08	-0.818477	0.04	0.232	0.000543028	2.94013e-18	-1.09796	0.089	0.359	5.6374e-14	2.83211e-08	5.88025e-18
Nid1	7.94373e-09	-0.343268	0.631	0.778	0.000152313	3.12105e-18	-0.396464	0.643	0.818	5.9843e-14	7.94373e-09	6.2421e-18
Jun	2.45025e-15	-0.65503	0.517	0.822	4.69811e-11	4.62394e-18	-0.613676	0.626	0.817	8.86594e-14	2.45025e-15	9.24788e-18
Vcan	2.75721e-05	-0.336684	0.329	0.487	0.528668	6.49929e-18	-0.537755	0.323	0.573	1.24617e-13	2.75721e-05	1.29986e-17
Cald1	1.01736e-14	-0.409946	0.987	0.996	1.95068e-10	7.1095e-18	-0.414704	1	0.99	1.36318e-13	1.01736e-14	1.4219e-17
Sesn3	7.15748e-18	0.369067	0.745	0.464	1.37238e-13	3.3601e-15	0.265188	0.685	0.503	6.44266e-11	3.3601e-15	1.4315e-17
Vegfd	8.06329e-15	-0.465948	0.074	0.398	1.54606e-10	7.53192e-18	-0.383792	0.102	0.373	1.44417e-13	8.06329e-15	1.50638e-17
Afap1l2	1.99977e-10	-0.272823	0.047	0.294	3.83435e-06	7.62967e-18	-0.267352	0.043	0.307	1.46291e-13	1.99977e-10	1.52593e-17
Sfrp2	3.27342e-11	-0.735939	0.034	0.281	6.27645e-07	8.03777e-18	-0.804112	0.072	0.338	1.54116e-13	3.27342e-11	1.60755e-17
Zfp503	8.67777e-09	-0.35762	0.443	0.671	0.000166388	8.55881e-18	-0.406777	0.54	0.734	1.64107e-13	8.67777e-09	1.71176e-17
Aspn	3.53971e-14	-0.565209	0.087	0.405	6.78704e-10	9.8051e-18	-0.556095	0.115	0.384	1.88003e-13	3.53971e-14	1.96102e-17
Gpm6b	1.09021e-06	-0.258208	0.302	0.504	0.0209037	9.85786e-18	-0.380702	0.289	0.567	1.89015e-13	1.09021e-06	1.97157e-17
Svil	8.36162e-11	-0.348202	0.356	0.621	1.60326e-06	2.19876e-17	-0.346837	0.391	0.653	4.2159e-13	8.36162e-11	4.39752e-17
Enpep	1.72979e-10	-0.271514	0.04	0.28	3.31669e-06	3.53438e-17	-0.264051	0.043	0.302	6.77682e-13	1.72979e-10	7.06875e-17
Col15a1	5.48208e-12	-0.578068	0.04	0.303	1.05113e-07	6.03385e-17	-0.531277	0.068	0.319	1.15693e-12	5.48208e-12	1.20677e-16
Add3	4.19256e-05	-0.266197	0.617	0.717	0.803882	8.36946e-17	-0.366858	0.566	0.758	1.60476e-12	4.19256e-05	1.67389e-16
Clca3a1	9.17909e-12	-0.367957	0.02	0.277	1.76e-07	1.02229e-16	-0.401367	0.043	0.291	1.96014e-12	9.17909e-12	2.04458e-16
Alx1	5.4851e-13	-0.482529	0.047	0.336	1.05171e-08	1.11996e-16	-0.462124	0.111	0.366	2.14741e-12	5.4851e-13	2.23992e-16
Lbh	1.27577e-16	-0.517383	0.564	0.792	2.44617e-12	1.86687e-16	-0.443404	0.591	0.75	3.57954e-12	1.86687e-16	2.55155e-16
Arl4a	0.0185541	-0.261603	0.463	0.553	1	2.08599e-16	-0.478783	0.328	0.578	3.99969e-12	0.0185541	4.17199e-16
Lims1	6.82208e-06	-0.265934	0.577	0.706	0.130807	3.42883e-16	-0.354167	0.596	0.757	6.57444e-12	6.82208e-06	6.85767e-16
Ier2	5.23438e-08	0.290642	0.879	0.756	0.00100364	3.57262e-16	0.327878	0.902	0.731	6.85015e-12	5.23438e-08	7.14525e-16
Thbs2	6.88074e-10	-0.428223	0.04	0.263	1.31931e-05	4.20913e-16	-0.441503	0.055	0.299	8.07059e-12	6.88074e-10	8.41826e-16
Gm13889	9.62786e-16	-0.756951	0	0.32	1.84605e-11	4.26597e-16	-0.636997	0.043	0.285	8.17957e-12	9.62786e-16	8.53194e-16
Itih5	2.03434e-09	-0.330182	0.067	0.3	3.90064e-05	4.35001e-16	-0.395934	0.077	0.331	8.34072e-12	2.03434e-09	8.70003e-16
Dclk1	4.23146e-10	-0.374809	0.034	0.264	8.11341e-06	4.37969e-16	-0.357349	0.051	0.295	8.39761e-12	4.23146e-10	8.75937e-16
Ahnak	1.00932e-08	-0.397632	0.51	0.683	0.000193527	4.79982e-16	-0.385791	0.502	0.72	9.20318e-12	1.00932e-08	9.59965e-16
Smc4	1.89128e-10	-0.66419	0.443	0.614	3.62634e-06	4.99302e-16	-0.615323	0.468	0.656	9.57361e-12	1.89128e-10	9.98604e-16
Oat	6.92973e-08	-0.263312	0.577	0.781	0.00132871	6.87937e-16	-0.288529	0.728	0.862	1.31905e-11	6.92973e-08	1.37587e-15
Snai2	3.9317e-09	-0.415786	0.47	0.667	7.53864e-05	8.67555e-16	-0.454537	0.532	0.686	1.66345e-11	3.9317e-09	1.73511e-15
Cryab	6.64978e-06	-0.311079	0.054	0.204	0.127503	1.64746e-15	-0.452628	0.06	0.303	3.15885e-11	6.64978e-06	3.29493e-15
Bmp4	2.31194e-10	-0.320839	0.148	0.416	4.43292e-06	1.81016e-15	-0.346186	0.174	0.443	3.4708e-11	2.31194e-10	3.62032e-15
Prc1	1.97401e-11	-0.611226	0.027	0.279	3.78496e-07	1.88623e-15	-0.582412	0.077	0.316	3.61666e-11	1.97401e-11	3.77246e-15
Flna	7.63182e-11	-0.388072	0.819	0.916	1.46333e-06	3.86257e-15	-0.364223	0.898	0.926	7.40609e-11	7.63182e-11	7.72514e-15
Ndrg2	5.90451e-07	-0.327886	0.114	0.306	0.0113213	4.04708e-15	-0.374651	0.098	0.34	7.75988e-11	5.90451e-07	8.09416e-15
Tmem176a	4.45927e-11	0.376761	0.832	0.658	8.55021e-07	4.14115e-15	0.301435	0.872	0.714	7.94024e-11	4.45927e-11	8.2823e-15
Col6a3	8.62681e-12	-0.428742	0.396	0.646	1.6541e-07	4.14904e-15	-0.413169	0.451	0.674	7.95538e-11	8.62681e-12	8.29809e-15
Hibadh	1.04659e-10	0.324143	0.685	0.473	2.00673e-06	4.71142e-15	0.272353	0.706	0.533	9.03368e-11	1.04659e-10	9.42284e-15
Nkd1	1.66261e-06	-0.39054	0.362	0.543	0.0318788	5.91651e-15	-0.389905	0.298	0.553	1.13443e-10	1.66261e-06	1.1833e-14
Agtr1a	1.29495e-07	-0.26564	0.047	0.232	0.00248293	7.59216e-15	-0.265813	0.017	0.237	1.45572e-10	1.29495e-07	1.51843e-14
Sgo1	2.25427e-08	-0.254529	0.04	0.241	0.000432234	7.69433e-15	-0.283414	0.051	0.278	1.47531e-10	2.25427e-08	1.53887e-14
Abracl	2.85938e-07	-0.281673	0.812	0.882	0.00548257	1.22878e-14	-0.322262	0.783	0.882	2.35605e-10	2.85938e-07	2.45755e-14
Kif22	1.74637e-07	-0.300615	0.074	0.262	0.0033485	1.80067e-14	-0.348577	0.081	0.309	3.45261e-10	1.74637e-07	3.60135e-14
Rasgrp2	2.01309e-14	-0.533129	0.483	0.741	3.8599e-10	8.59868e-10	-0.387305	0.626	0.715	1.64871e-05	8.59868e-10	4.02618e-14
Ckap2l	2.19965e-09	-0.335513	0.04	0.252	4.21761e-05	2.0905e-14	-0.348119	0.068	0.297	4.00832e-10	2.19965e-09	4.18099e-14
Sct	1.68413e-07	-0.2834	0.087	0.283	0.00322916	2.48972e-14	-0.269724	0.038	0.261	4.77378e-10	1.68413e-07	4.97943e-14
Ccna2	2.62167e-08	-0.436207	0.101	0.304	0.00050268	2.61855e-14	-0.453526	0.132	0.361	5.02081e-10	2.62167e-08	5.2371e-14
Emp2	1.42707e-08	-0.266808	0.128	0.354	0.000273626	2.84989e-14	-0.282269	0.162	0.412	5.46437e-10	1.42707e-08	5.69977e-14
Prrx1	5.08748e-07	-0.271835	0.034	0.202	0.00975473	3.20159e-14	-0.379533	0.068	0.293	6.13872e-10	5.08748e-07	6.40318e-14
Aurkb	7.87629e-09	-0.372768	0.047	0.251	0.00015102	3.808e-14	-0.383791	0.072	0.294	7.30146e-10	7.87629e-09	7.616e-14
Hjurp	5.9029e-06	-0.344193	0.295	0.452	0.113182	4.53568e-14	-0.385836	0.315	0.527	8.6967e-10	5.9029e-06	9.07135e-14
Carmn	5.18984e-10	-0.337836	0.174	0.428	9.95101e-06	5.22713e-14	-0.370856	0.209	0.444	1.00225e-09	5.18984e-10	1.04543e-13
Zbtb20	6.60428e-14	0.433385	0.758	0.555	1.2663e-09	5.34544e-13	0.30265	0.723	0.556	1.02493e-08	5.34544e-13	1.32086e-13
Pdlim3	1.56933e-05	-0.401375	0.154	0.308	0.300904	6.94456e-14	-0.426098	0.047	0.265	1.33155e-09	1.56933e-05	1.38891e-13
Sgo2a	9.04445e-08	-0.252521	0.034	0.217	0.00173418	7.42839e-14	-0.292331	0.047	0.262	1.42432e-09	9.04445e-08	1.48568e-13
Fbxo5	5.42435e-08	-0.345959	0.074	0.268	0.00104007	7.73778e-14	-0.346814	0.089	0.311	1.48364e-09	5.42435e-08	1.54756e-13
Sptbn1	7.10184e-07	-0.280033	0.852	0.908	0.0136171	8.75622e-14	-0.309147	0.851	0.908	1.67892e-09	7.10184e-07	1.75124e-13
Kcnq1ot1	1.084e-13	0.379595	0.98	0.859	2.07846e-09	1.12336e-13	0.263721	0.983	0.919	2.15392e-09	1.12336e-13	2.168e-13
Hmmr	4.98968e-06	-0.342101	0.074	0.235	0.0956721	1.24119e-13	-0.4409	0.068	0.285	2.37985e-09	4.98968e-06	2.48237e-13
Itgb1	1.31534e-13	-0.366774	0.919	0.973	2.52203e-09	3.06838e-13	-0.260667	0.97	0.976	5.88332e-09	3.06838e-13	2.63068e-13
Cnn2	7.71612e-13	-0.466251	0.879	0.925	1.47949e-08	1.57861e-13	-0.402867	0.923	0.916	3.02683e-09	7.71612e-13	3.15722e-13
Cd248	2.14826e-06	-0.320842	0.336	0.51	0.0411907	2.89041e-13	-0.316636	0.379	0.604	5.54208e-09	2.14826e-06	5.78083e-13
Id4	8.58572e-11	-0.504456	0.074	0.328	1.64623e-06	3.33715e-13	-0.37483	0.068	0.281	6.39865e-09	8.58572e-11	6.6743e-13
Ets1	1.56534e-09	-0.335797	0.255	0.524	3.00138e-05	3.70065e-13	-0.318014	0.319	0.536	7.09563e-09	1.56534e-09	7.4013e-13
Bex2	4.97919e-10	0.363727	0.369	0.175	9.54711e-06	4.46123e-13	0.32764	0.417	0.227	8.55397e-09	4.97919e-10	8.92247e-13
Cxcl12	5.09776e-13	0.483723	0.691	0.429	9.77444e-09	5.76339e-11	0.277055	0.745	0.516	1.10507e-06	5.76339e-11	1.01955e-12
Klf6	2.32477e-05	-0.270804	0.336	0.499	0.445751	5.44196e-13	-0.333147	0.306	0.537	1.04344e-08	2.32477e-05	1.08839e-12
Knl1	1.8228e-09	-0.316601	0.027	0.242	3.49504e-05	5.69353e-13	-0.294447	0.068	0.279	1.09168e-08	1.8228e-09	1.13871e-12
Olfml3	0.00017073	-0.305685	0.624	0.707	1	5.85161e-13	-0.429451	0.583	0.737	1.12199e-08	0.00017073	1.17032e-12
Kif20b	1.46877e-08	-0.296631	0.04	0.244	0.000281622	6.01713e-13	-0.300257	0.072	0.286	1.15373e-08	1.46877e-08	1.20343e-12
Top2a	3.14994e-06	-0.946055	0.268	0.406	0.0603969	7.48219e-13	-0.965949	0.281	0.468	1.43463e-08	3.14994e-06	1.49644e-12
Gnb4	1.76608e-07	-0.292434	0.376	0.575	0.00338628	9.29855e-13	-0.260376	0.379	0.6	1.7829e-08	1.76608e-07	1.85971e-12
Matn2	0.000365249	-0.323916	0.409	0.524	1	1.05218e-12	-0.47014	0.383	0.607	2.01745e-08	0.000365249	2.10436e-12
Col23a1	1.13276e-08	-0.31014	0.027	0.226	0.000217196	1.08268e-12	-0.335224	0.051	0.254	2.07593e-08	1.13276e-08	2.16536e-12
Rsu1	5.03465e-07	-0.270585	0.752	0.861	0.00965345	1.18178e-12	-0.284115	0.809	0.895	2.26594e-08	5.03465e-07	2.36355e-12
Adamts1	3.19887e-11	-0.492763	0.201	0.467	6.13352e-07	1.485e-12	-0.388503	0.311	0.527	2.84735e-08	3.19887e-11	2.97001e-12
2022-09-11	1.86064e-07	-0.32279	0.899	0.907	0.00356759	1.50179e-12	-0.35587	0.877	0.901	2.87954e-08	1.86064e-07	3.00359e-12
Nusap1	3.70968e-06	-0.595081	0.134	0.293	0.0711294	1.53445e-12	-0.587448	0.119	0.324	2.94216e-08	3.70968e-06	3.0689e-12
Ccdc34	3.60679e-06	-0.302658	0.698	0.777	0.0691565	1.53795e-12	-0.339497	0.749	0.817	2.94886e-08	3.60679e-06	3.07589e-12
Ccdc80	5.53049e-06	-0.383861	0.805	0.808	0.106042	2.22781e-12	-0.399322	0.719	0.823	4.2716e-08	5.53049e-06	4.45562e-12
Myl9	4.56716e-11	-0.852486	0.852	0.882	8.75707e-07	2.28723e-12	-0.799421	0.919	0.893	4.38553e-08	4.56716e-11	4.57446e-12
Cox4i2	2.41031e-12	-0.576469	0.101	0.388	4.62154e-08	1.65663e-11	-0.427664	0.081	0.28	3.17642e-07	1.65663e-11	4.82063e-12
Cdca8	3.40683e-08	-0.502743	0.141	0.351	0.000653226	2.7262e-12	-0.53538	0.196	0.395	5.22722e-08	3.40683e-08	5.4524e-12
Lgi2	1.32504e-09	-0.310356	0.074	0.309	2.54063e-05	3.22852e-12	-0.314868	0.149	0.365	6.19036e-08	1.32504e-09	6.45703e-12
Tpx2	2.00721e-07	-0.449635	0.121	0.317	0.00384863	3.9653e-12	-0.493875	0.14	0.344	7.60307e-08	2.00721e-07	7.9306e-12
Plpp3	1.32091e-05	-0.354161	0.161	0.314	0.253271	4.54503e-12	-0.459032	0.166	0.382	8.71464e-08	1.32091e-05	9.09006e-12
Pbk	9.48465e-08	-0.278673	0.054	0.24	0.00181859	6.60033e-12	-0.278115	0.081	0.281	1.26555e-07	9.48465e-08	1.32007e-11
Bambi	4.5429e-08	-0.281011	0.121	0.325	0.000871055	7.12304e-12	-0.290389	0.174	0.386	1.36577e-07	4.5429e-08	1.42461e-11
Kif11	1.19475e-07	-0.280456	0.047	0.231	0.00229082	9.98982e-12	-0.270326	0.051	0.242	1.91545e-07	1.19475e-07	1.99796e-11
Tmod3	9.35206e-08	-0.283197	0.564	0.7	0.00179316	1.29658e-11	-0.271062	0.609	0.741	2.48606e-07	9.35206e-08	2.59316e-11
Pclaf	1.4001e-07	-0.802303	0.315	0.474	0.00268454	2.1869e-11	-0.754118	0.4	0.546	4.19316e-07	1.4001e-07	4.3738e-11
Nav3	2.87806e-07	-0.263976	0.02	0.184	0.00551839	2.24381e-11	-0.288468	0.06	0.245	4.30229e-07	2.87806e-07	4.48763e-11
Hsp90b1	0.000112104	-0.266307	0.973	0.979	1	2.56568e-11	-0.389694	1	0.992	4.91944e-07	0.000112104	5.13136e-11
Ppp1r12a	6.79997e-10	-0.494252	0.604	0.766	1.30383e-05	2.74059e-11	-0.35248	0.651	0.783	5.25481e-07	6.79997e-10	5.48118e-11
Dkk1	3.56705e-10	0.457976	0.463	0.24	6.83946e-06	2.87087e-11	0.39499	0.4	0.22	5.5046e-07	3.56705e-10	5.74174e-11
Fos	2.58629e-07	0.309863	0.906	0.788	0.00495896	3.19798e-11	0.32916	0.843	0.73	6.1318e-07	2.58629e-07	6.39595e-11
Lrriq1	4.65216e-10	-0.345861	0.027	0.255	8.92006e-06	3.69314e-11	-0.271727	0.043	0.223	7.08122e-07	4.65216e-10	7.38628e-11
Smc2	3.4871e-05	-0.465856	0.362	0.479	0.668617	3.95492e-11	-0.532164	0.4	0.539	7.58317e-07	3.4871e-05	7.90985e-11
Racgap1	6.91586e-06	-0.272845	0.134	0.297	0.132605	4.64094e-11	-0.341518	0.157	0.352	8.89855e-07	6.91586e-06	9.28189e-11
1500009L16Rik	3.51745e-10	-0.372738	0.295	0.555	6.74436e-06	4.78184e-11	-0.310173	0.391	0.588	9.16869e-07	3.51745e-10	9.56367e-11
Zfhx3	2.11126e-06	-0.288213	0.248	0.447	0.0404813	5.5394e-11	-0.277143	0.272	0.484	1.06213e-06	2.11126e-06	1.10788e-10
Myl6	1.90544e-06	-0.340843	1	1	0.036535	9.99562e-11	-0.331496	1	0.999	1.91656e-06	1.90544e-06	1.99912e-10
Tmem176b	1.45863e-08	0.327247	0.866	0.733	0.000279678	1.14221e-10	0.271797	0.894	0.813	2.19008e-06	1.45863e-08	2.28442e-10
Cdkn1c	4.20327e-09	-0.295306	0.993	0.972	8.05934e-05	2.24129e-10	-0.393179	1	0.99	4.29746e-06	4.20327e-09	4.48259e-10
Mki67	3.72666e-06	-0.615285	0.208	0.363	0.0714549	2.49325e-10	-0.639331	0.251	0.423	4.78057e-06	3.72666e-06	4.98651e-10
Rap1a	2.16154e-05	-0.288866	0.664	0.781	0.414454	2.78782e-10	-0.277618	0.694	0.817	5.34536e-06	2.16154e-05	5.57564e-10
Incenp	3.29105e-10	-0.372935	0.054	0.288	6.31025e-06	2.99017e-10	-0.345173	0.149	0.324	5.73335e-06	3.29105e-10	5.98033e-10
Igf1	0.0741653	-0.257976	0.087	0.134	1	3.46732e-10	-0.566866	0.098	0.279	6.64824e-06	0.0741653	6.93465e-10
Sdc2	4.04837e-10	-0.467166	0.436	0.658	7.76235e-06	2.99421e-09	-0.361892	0.472	0.626	5.7411e-05	2.99421e-09	8.09674e-10
Tubb4b	6.74391e-06	-0.606921	0.638	0.741	0.129308	9.70773e-10	-0.48909	0.77	0.838	1.86136e-05	6.74391e-06	1.94155e-09
H2afz	1.01047e-09	-0.498862	1	0.99	1.93748e-05	4.04249e-09	-0.420649	0.996	0.99	7.75107e-05	4.04249e-09	2.02095e-09
Tinagl1	1.70437e-05	-0.47092	0.067	0.21	0.326796	1.02982e-09	-0.415303	0.043	0.203	1.97458e-05	1.70437e-05	2.05964e-09
Sema3c	1.66754e-08	-0.375716	0.067	0.271	0.000319734	1.07552e-09	-0.32915	0.102	0.274	2.06221e-05	1.66754e-08	2.15105e-09
Ccnb1	5.98763e-05	-0.423541	0.114	0.25	1	1.07902e-09	-0.442349	0.136	0.316	2.06891e-05	5.98763e-05	2.15803e-09
Abcc9	2.84063e-07	-0.374507	0.181	0.381	0.00544663	1.16327e-09	-0.264879	0.098	0.274	2.23046e-05	2.84063e-07	2.32655e-09
Jpt1	1.4389e-08	-0.398752	0.564	0.729	0.000275894	1.38587e-09	-0.367155	0.719	0.806	2.65726e-05	1.4389e-08	2.77174e-09
Hist1h2bc	0.00408491	0.322935	0.409	0.345	1	1.3938e-09	0.325648	0.532	0.377	2.67248e-05	0.00408491	2.7876e-09
Emcn	3.15853e-06	-0.288416	0.201	0.382	0.0605616	1.59266e-09	-0.29792	0.213	0.399	3.05377e-05	3.15853e-06	3.18532e-09
Cdk1	4.27334e-08	-0.598507	0.289	0.47	0.00081937	1.59281e-09	-0.58735	0.409	0.54	3.05406e-05	4.27334e-08	3.18562e-09
Cygb	7.48054e-05	-0.253065	0.403	0.555	1	1.96015e-09	-0.272944	0.391	0.586	3.75839e-05	7.48054e-05	3.9203e-09
Timp3	1.9755e-09	-0.433741	0.671	0.814	3.78783e-05	1.3428e-08	-0.347489	0.647	0.726	0.000257468	1.3428e-08	3.951e-09
Mfap5	0.000109097	-0.419591	0.101	0.24	1	2.0977e-09	-0.627133	0.111	0.287	4.02213e-05	0.000109097	4.1954e-09
Tk1	6.20329e-07	-0.267359	0.067	0.241	0.0118942	2.64885e-09	-0.283086	0.132	0.303	5.0789e-05	6.20329e-07	5.29769e-09
Myh9	2.83891e-09	-0.328132	0.45	0.682	5.44332e-05	1.60498e-07	-0.256687	0.532	0.659	0.0030774	1.60498e-07	5.67782e-09
Pdgfrb	1.79702e-06	-0.396118	0.483	0.635	0.0344561	3.79513e-09	-0.386642	0.489	0.632	7.27678e-05	1.79702e-06	7.59026e-09
Kif23	8.69428e-06	-0.263977	0.074	0.226	0.166704	7.29051e-09	-0.315955	0.111	0.27	0.000139788	8.69428e-06	1.4581e-08
Spc25	0.000217199	-0.369285	0.255	0.375	1	1.40762e-08	-0.443837	0.255	0.401	0.000269897	0.000217199	2.81524e-08
Tuba1b	1.68436e-07	-0.440896	0.899	0.922	0.0032296	1.68007e-08	-0.302389	0.957	0.952	0.000322137	1.68436e-07	3.36014e-08
Dkk2	0.0021039	-0.643777	0.148	0.245	1	1.82509e-08	-0.623133	0.115	0.267	0.000349942	0.0021039	3.65017e-08
Igfbp2	3.18771e-07	-0.561353	0.188	0.379	0.00611212	2.10775e-08	-0.487209	0.213	0.378	0.00040414	3.18771e-07	4.2155e-08
Akap12	1.06982e-05	-0.406832	0.852	0.868	0.205127	2.19607e-08	-0.34559	0.847	0.874	0.000421075	1.06982e-05	4.39214e-08
Cdc20	3.26878e-06	-0.494455	0.101	0.266	0.0626755	3.38149e-08	-0.505165	0.17	0.331	0.000648367	3.26878e-06	6.76298e-08
Angpt2	6.62609e-07	-0.275856	0.013	0.169	0.0127049	4.08707e-08	-0.28266	0.047	0.186	0.000783655	6.62609e-07	8.17414e-08
Arl6ip1	0.0240881	-0.464607	0.604	0.627	1	7.12758e-08	-0.53465	0.553	0.662	0.00136664	0.0240881	1.42552e-07
Wnt4	6.52506e-06	-0.597983	0.054	0.2	0.125112	8.61553e-08	-0.417281	0.068	0.204	0.00165194	6.52506e-06	1.72311e-07
Myh11	3.27964e-05	-1.02285	0.04	0.166	0.628839	1.05368e-07	-0.956038	0.051	0.185	0.00202032	3.27964e-05	2.10735e-07
Ube2s	0.0318854	-0.271551	0.899	0.895	1	4.72896e-07	-0.384377	0.902	0.93	0.0090673	0.0318854	9.45791e-07
Cenpf	7.1541e-05	-0.700428	0.188	0.32	1	6.04331e-07	-0.68589	0.243	0.373	0.0115874	7.1541e-05	1.20866e-06
Pla2g4a	6.47907e-07	-0.309893	0.383	0.573	0.012423	1.71157e-06	-0.254168	0.379	0.506	0.0328176	1.71157e-06	1.29581e-06
Gas6	5.06207e-06	-0.468533	0.148	0.308	0.0970601	8.42616e-07	-0.429	0.234	0.366	0.0161563	5.06207e-06	1.68523e-06
Hist1h4d	0.0188049	-0.30147	0.315	0.374	1	8.76589e-07	-0.356061	0.264	0.397	0.0168077	0.0188049	1.75318e-06
Nfat5	0.000142515	-0.262695	0.51	0.651	1	1.47084e-06	-0.342464	0.515	0.638	0.0282019	0.000142515	2.94168e-06
Meg3	0.477877	-0.338662	0.758	0.788	1	2.0514e-06	-0.814999	0.843	0.877	0.0393336	0.477877	4.1028e-06
Birc5	6.41474e-05	-0.578699	0.282	0.399	1	3.54024e-06	-0.494712	0.362	0.47	0.0678806	6.41474e-05	7.08048e-06
Kcnj8	3.61848e-06	-0.451049	0.483	0.618	0.0693808	0.00137348	-0.325702	0.383	0.452	1	0.00137348	7.23695e-06
Cnn1	1.07871e-05	-0.521917	0	0.117	0.206831	3.67801e-06	-0.43326	0.017	0.112	0.0705222	1.07871e-05	7.35601e-06
Spc24	1.46403e-05	-0.392429	0.255	0.4	0.280714	3.78582e-06	-0.37452	0.387	0.472	0.0725893	1.46403e-05	7.57163e-06
Igfbp7	0.000631679	-0.445976	0.953	0.945	1	3.94062e-06	-0.391985	0.966	0.95	0.0755575	0.000631679	7.88123e-06
Lmna	4.05985e-06	-0.330595	0.49	0.665	0.0778436	0.000669503	-0.311445	0.706	0.718	1	0.000669503	8.11968e-06
Cks2	6.13489e-06	-0.601403	0.309	0.46	0.11763	8.51563e-05	-0.531904	0.481	0.53	1	8.51563e-05	1.22697e-05
Timp2	6.03817e-05	-0.274238	0.705	0.768	1	9.86779e-06	-0.258615	0.762	0.822	0.189205	6.03817e-05	1.97355e-05
Cenpe	4.43605e-05	-0.385855	0.154	0.305	0.850568	1.50124e-05	-0.409065	0.238	0.348	0.287847	4.43605e-05	3.00245e-05
Ckb	0.000279822	-0.619584	0.456	0.593	1	1.56319e-05	-0.524525	0.511	0.61	0.299726	0.000279822	3.12636e-05
Ube2c	0.00400559	-0.819087	0.322	0.391	1	2.78981e-05	-0.847465	0.349	0.439	0.534919	0.00400559	5.57955e-05
2022-09-04	0.00141449	-0.285054	0.248	0.368	1	3.22129e-05	-0.282397	0.2	0.313	0.61765	0.00141449	6.44247e-05
Mfge8	3.68395e-05	-0.404266	0.711	0.782	0.706361	0.000151579	-0.349467	0.817	0.82	1	0.000151579	7.36777e-05
Cks1b	0.00583859	-0.29409	0.685	0.7	1	5.13884e-05	-0.259407	0.779	0.785	0.98532	0.00583859	0.000102774
Nts	6.11757e-05	-0.885041	0.007	0.11	1	0.000663934	-0.760152	0.047	0.116	1	0.000663934	0.000122348
Hist1h2ap	7.22018e-05	-1.43451	0.315	0.434	1	7.95775e-05	-1.65069	0.613	0.635	1	7.95775e-05	0.000144398
Cenpa	0.010948	-0.356381	0.309	0.39	1	8.34899e-05	-0.369204	0.332	0.446	1	0.010948	0.000166973
Hist1h2ae	0.0732765	-0.743008	0.315	0.342	1	0.000146517	-0.976482	0.357	0.424	1	0.0732765	0.000293012
Hmgb2	0.000278645	-0.749855	0.899	0.878	1	0.00202032	-0.687559	0.932	0.888	1	0.00202032	0.000557212
Itm2a	0.00717576	-0.436909	0.262	0.362	1	0.000416934	-1.02068	0.391	0.485	1	0.00717576	0.000833695
Postn	0.078122	-0.560142	0.242	0.299	1	0.000951562	-0.729032	0.311	0.383	1	0.078122	0.00190222
Penk	0.38604	-0.54786	0.785	0.612	1	0.00158729	-0.385853	0.847	0.603	1	0.38604	0.00317207
Lig1	0.00280302	-0.290002	0.329	0.424	1	0.00158798	-0.25014	0.421	0.489	1	0.00280302	0.00317344
Hist1h1b	0.0132644	-0.90574	0.309	0.37	1	0.00188062	-0.943904	0.357	0.407	1	0.0132644	0.0037577
Fbln5	0.0206641	-0.347936	0.591	0.613	1	0.00188851	-0.392517	0.66	0.665	1	0.0206641	0.00377346
Rgs5	0.162946	-0.417995	0.617	0.588	1	0.00201163	-0.429214	0.362	0.442	1	0.162946	0.00401922
Cited2	0.00206399	-0.268823	0.53	0.627	1	0.00217938	-0.283025	0.604	0.633	1	0.00217938	0.00412373
Tyms	0.0254782	-0.331585	0.43	0.445	1	0.00253419	-0.350066	0.532	0.549	1	0.0254782	0.00506197
Mylk	0.0040227	-0.594431	0.792	0.819	1	0.569281	-0.567473	0.881	0.81	1	0.569281	0.00802922
Hist1h1e	0.37972	-0.384769	0.617	0.589	1	0.00540343	-0.42584	0.553	0.595	1	0.37972	0.0107777
H2afx	0.0448865	-0.456721	0.597	0.596	1	0.0167613	-0.447199	0.681	0.673	1	0.0448865	0.0332416
Cfh	0.0982513	-0.311909	0.933	0.832	1	0.0254533	-0.308102	0.894	0.773	1	0.0982513	0.0502586
Col1a1	0.957264	-0.495019	0.987	0.907	1	0.033197	-0.761354	1	0.939	1	0.957264	0.065292
Ptp4a3	0.0803139	-0.549426	0.275	0.32	1	0.294926	-0.290529	0.306	0.333	1	0.294926	0.154177
Pfn2	0.927439	-0.377941	0.503	0.47	1	0.14802	-0.281935	0.604	0.536	1	0.927439	0.27413

## Sheet: Stroma_Subcluster.6.Mut.CTRL.m
Gene	CTRL_p_val	CTRL_avg_logFC	CTRL_pct.1	CTRL_pct.2	CTRL_p_val_adj	Mutant_p_val	Mutant_avg_logFC	Mutant_pct.1	Mutant_pct.2	Mutant_p_val_adj	max_pval	minimump_p_val
Clec3b	1.73526e-235	1.47758	0.842	0.006	3.32718e-231	3.03285e-206	1.48846	0.557	0.02	5.81518e-202	3.03285e-206	3.47052e-235
Dpt	7.71418e-193	1.42895	0.789	0.01	1.47912e-188	3.07232e-146	0.977199	0.569	0.043	5.89087e-142	3.07232e-146	1.54284e-192
Cthrc1	2.32263e-83	1.27623	0.754	0.057	4.4534e-79	1.7743e-191	1.53368	0.816	0.086	3.40203e-187	2.32263e-83	3.54859e-191
Fbln2	4.85013e-140	1.47867	0.86	0.035	9.29964e-136	3.73059e-187	1.29714	0.822	0.089	7.15304e-183	4.85013e-140	7.46119e-187
Tnxb	5.82307e-101	0.769933	0.526	0.014	1.11652e-96	3.44412e-181	0.841146	0.603	0.036	6.60376e-177	5.82307e-101	6.88824e-181
S100b	1.03504e-67	0.432521	0.368	0.01	1.98459e-63	4.20382e-164	0.599099	0.471	0.019	8.0604e-160	1.03504e-67	8.40763e-164
Angptl7	1.31152e-158	1.00999	0.579	0.004	2.51472e-154	3.81245e-159	0.684388	0.379	0.009	7.31e-155	1.31152e-158	7.62491e-159
Col5a3	2.69158e-71	0.563018	0.491	0.022	5.16083e-67	4.76268e-158	0.914099	0.592	0.044	9.13196e-154	2.69158e-71	9.52536e-158
Col6a6	1.07107e-156	0.755175	0.667	0.01	2.05367e-152	3.27889e-153	0.658386	0.552	0.036	6.28694e-149	3.27889e-153	2.14214e-156
Fst	3.84418e-46	0.879982	0.368	0.021	7.37083e-42	8.95322e-147	1.05044	0.471	0.025	1.71669e-142	3.84418e-46	1.79064e-146
Scara5	1.73841e-32	0.399421	0.281	0.018	3.33322e-28	4.1389e-143	0.412147	0.454	0.022	7.93593e-139	1.73841e-32	8.2778e-143
Creb5	2.69659e-78	0.914555	0.737	0.058	5.17043e-74	3.8368e-142	0.891699	0.684	0.077	7.35668e-138	2.69659e-78	7.6736e-142
Fmo1	6.64272e-95	1.18904	0.737	0.044	1.27368e-90	1.38694e-135	0.903539	0.621	0.063	2.65932e-131	6.64272e-95	2.77389e-135
Angptl1	3.40796e-20	0.52642	0.175	0.012	6.53442e-16	2.67823e-133	0.763475	0.414	0.02	5.13523e-129	3.40796e-20	5.35646e-133
Fgf18	1.66947e-34	0.304591	0.211	0.008	3.20104e-30	7.29038e-130	0.578278	0.391	0.017	1.39786e-125	1.66947e-34	1.45808e-129
Cd34	1.2271e-78	1.21361	0.825	0.082	2.35284e-74	1.57462e-126	1.13145	0.81	0.149	3.01918e-122	1.2271e-78	3.14924e-126
Igf1	8.9278e-77	1.69255	0.877	0.1	1.71182e-72	2.38529e-109	1.54927	0.879	0.222	4.57355e-105	8.9278e-77	4.77058e-109
Spon2	5.90943e-107	1.03305	0.737	0.035	1.13307e-102	5.16437e-80	0.680427	0.506	0.074	9.90217e-76	5.16437e-80	1.18189e-106
Ahnak2	7.74907e-41	0.37319	0.351	0.022	1.48581e-36	1.71839e-105	0.54462	0.397	0.027	3.29484e-101	7.74907e-41	3.43678e-105
Mfap5	3.80048e-50	1.90156	0.912	0.199	7.28704e-46	8.23823e-102	2.02629	0.839	0.234	1.5796e-97	3.80048e-50	1.64765e-101
Ptger3	7.67642e-54	0.395989	0.316	0.01	1.47188e-49	2.90315e-100	0.409695	0.333	0.018	5.56651e-96	7.67642e-54	5.80631e-100
Postn	2.93287e-54	2.41222	1	0.265	5.62349e-50	1.00647e-96	1.92647	0.908	0.341	1.92981e-92	2.93287e-54	2.01294e-96
Nov	1.37126e-26	0.294872	0.158	0.006	2.62925e-22	1.87166e-96	0.496194	0.299	0.014	3.58872e-92	1.37126e-26	3.74332e-96
Pi16	3.57562e-77	0.761992	0.351	0.006	6.8559e-73	4.87254e-95	0.780139	0.264	0.01	9.3426e-91	3.57562e-77	9.74507e-95
Nupr1	3.15714e-56	0.604978	0.509	0.035	6.05349e-52	5.60842e-92	0.644135	0.54	0.07	1.07536e-87	3.15714e-56	1.12168e-91
Serpinf1	1.56535e-57	1.44306	0.877	0.157	3.0014e-53	1.84864e-87	0.9892	0.822	0.231	3.54459e-83	1.56535e-57	3.69729e-87
Medag	1.43885e-68	0.255526	0.281	0.003	2.75885e-64	3.09347e-87	0.272376	0.264	0.012	5.93142e-83	1.43885e-68	6.18694e-87
Capn6	8.24427e-46	0.791689	0.614	0.075	1.58076e-41	2.42597e-84	0.983424	0.638	0.127	4.65156e-80	8.24427e-46	4.85194e-84
Ebf2	3.68413e-18	0.288538	0.228	0.024	7.06394e-14	8.99461e-84	0.4916	0.368	0.032	1.72463e-79	3.68413e-18	1.79892e-83
Adam33	1.27635e-34	0.357571	0.281	0.017	2.44728e-30	1.88268e-83	0.425965	0.374	0.033	3.60985e-79	1.27635e-34	3.76536e-83
Pdpn	1.91097e-09	0.256783	0.246	0.055	3.66409e-05	1.84499e-82	0.479864	0.471	0.06	3.53759e-78	1.91097e-09	3.68998e-82
Cd55	1.30826e-55	0.59562	0.579	0.05	2.50845e-51	2.64148e-82	0.698745	0.483	0.065	5.06477e-78	1.30826e-55	5.28296e-82
Thbs3	2.15382e-42	0.636873	0.632	0.087	4.12974e-38	3.87147e-81	0.556504	0.598	0.109	7.42315e-77	2.15382e-42	7.74294e-81
Krtdap	6.46427e-64	0.552511	0.228	0.001	1.23946e-59	3.26922e-80	0.564591	0.19	0.004	6.2684e-76	6.46427e-64	6.53844e-80
Dlk1	1.47067e-44	2.84502	0.965	0.318	2.81985e-40	8.32119e-79	2.35655	0.902	0.464	1.5955e-74	1.47067e-44	1.66424e-78
Ank2	1.18156e-76	0.934054	0.807	0.078	2.26552e-72	5.65247e-77	0.577834	0.672	0.146	1.0838e-72	1.18156e-76	1.13049e-76
Sfrp4	1.29618e-42	0.266723	0.193	0.003	2.48529e-38	2.46433e-76	0.347929	0.241	0.012	4.7251e-72	1.29618e-42	4.92865e-76
Fam129a	7.72429e-21	0.314073	0.404	0.064	1.48106e-16	9.39272e-76	0.399532	0.448	0.056	1.80096e-71	7.72429e-21	1.87854e-75
Prrx1	3.8492e-49	1.08112	0.877	0.158	7.38046e-45	4.57812e-75	0.928271	0.787	0.239	8.77809e-71	3.8492e-49	9.15624e-75
Klf4	2.84017e-38	1.34449	0.825	0.199	5.44575e-34	3.09752e-74	0.995823	0.701	0.184	5.93919e-70	2.84017e-38	6.19504e-74
Ptma	8.39105e-25	-0.79205	1	1	1.6089e-20	3.21953e-74	-0.860819	1	1	6.17312e-70	8.39105e-25	6.43905e-74
Tmem158	9.09666e-51	1.37784	0.789	0.131	1.74419e-46	8.19094e-74	1.11634	0.741	0.231	1.57053e-69	9.09666e-51	1.63819e-73
Celf2	1.93625e-30	0.805722	0.754	0.197	3.71256e-26	7.48553e-73	0.699936	0.81	0.251	1.43527e-68	1.93625e-30	1.49711e-72
Scara3	2.17633e-50	0.553025	0.596	0.062	4.17289e-46	2.56484e-72	0.518085	0.511	0.088	4.91782e-68	2.17633e-50	5.12968e-72
Glt8d2	1.39628e-32	0.375896	0.439	0.05	2.67722e-28	5.12725e-72	0.365225	0.466	0.067	9.83099e-68	1.39628e-32	1.02545e-71
Agtr2	5.47205e-36	1.08622	0.754	0.18	1.04921e-31	1.75603e-71	0.987081	0.822	0.306	3.36701e-67	5.47205e-36	3.51206e-71
Dcn	5.28901e-39	2.78197	1	0.528	1.01411e-34	2.53365e-71	1.82326	0.948	0.656	4.85802e-67	5.28901e-39	5.0673e-71
Rbp4	1.02186e-70	0.815059	0.526	0.027	1.95932e-66	3.18396e-64	0.630456	0.385	0.05	6.10493e-60	3.18396e-64	2.04372e-70
Tppp3	4.07941e-23	0.971049	0.491	0.098	7.82185e-19	2.92023e-69	0.733903	0.546	0.109	5.59926e-65	4.07941e-23	5.84047e-69
Plpp3	4.85169e-36	1.26054	0.912	0.274	9.30264e-32	4.45228e-69	1.14013	0.833	0.332	8.53679e-65	4.85169e-36	8.90455e-69
Fez1	1.19781e-19	0.354538	0.316	0.044	2.29668e-15	4.52105e-69	0.408701	0.402	0.051	8.66865e-65	1.19781e-19	9.04209e-69
Fndc1	9.33103e-57	0.455866	0.333	0.011	1.78913e-52	6.93332e-69	0.299968	0.264	0.018	1.3294e-64	9.33103e-57	1.38666e-68
Rtl3	4.529e-67	0.386595	0.316	0.006	8.6839e-63	1.32143e-49	0.306745	0.305	0.039	2.53371e-45	1.32143e-49	9.058e-67
Bmp3	2.07108e-54	0.432258	0.351	0.014	3.97109e-50	1.67359e-66	0.340729	0.299	0.027	3.20895e-62	2.07108e-54	3.34719e-66
Dhrs7	4.28548e-29	0.435258	0.456	0.062	8.21698e-25	1.75614e-66	0.578639	0.517	0.098	3.36722e-62	4.28548e-29	3.51228e-66
Sparc	6.60193e-33	1.51189	1	0.987	1.26585e-28	8.60776e-65	1.17402	1	0.996	1.65045e-60	6.60193e-33	1.72155e-64
Prss35	2.19757e-64	0.547579	0.456	0.021	4.21362e-60	2.10612e-64	0.325642	0.339	0.036	4.03828e-60	2.19757e-64	4.21224e-64
Meg3	1.17496e-33	2.32144	0.982	0.777	2.25286e-29	2.21975e-64	1.90805	0.966	0.868	4.25614e-60	1.17496e-33	4.43949e-64
Egfl6	9.24255e-16	0.411334	0.193	0.02	1.77217e-11	2.94966e-64	0.532086	0.299	0.028	5.65567e-60	9.24255e-16	5.89931e-64
Col3a1	9.97697e-33	1.64955	1	0.94	1.91298e-28	2.32959e-63	1.29542	0.977	0.969	4.46676e-59	9.97697e-33	4.65918e-63
Osr1	2.5489e-58	0.893701	0.719	0.08	4.88727e-54	9.79276e-63	0.589578	0.586	0.126	1.87766e-58	2.5489e-58	1.95855e-62
Cdkn1c	1.59775e-21	1.08144	1	0.973	3.06353e-17	1.52599e-62	1.12551	1	0.991	2.92593e-58	1.59775e-21	3.05197e-62
Actb	1.47924e-22	-0.631621	1	1	2.83629e-18	1.56911e-61	-0.634924	1	1	3.0086e-57	1.47924e-22	3.13821e-61
Abi3bp	8.83417e-23	0.323175	0.298	0.033	1.69386e-18	2.40815e-61	0.596886	0.402	0.058	4.61738e-57	8.83417e-23	4.81629e-61
Col1a1	1.82262e-34	2.06962	1	0.911	3.4947e-30	7.18004e-61	1.42557	0.954	0.944	1.3767e-56	1.82262e-34	1.43601e-60
Aspn	6.79348e-21	1.18822	0.825	0.355	1.30258e-16	1.60038e-60	1.224	0.782	0.333	3.06856e-56	6.79348e-21	3.20075e-60
Anpep	4.25668e-34	0.489841	0.509	0.067	8.16176e-30	2.96565e-60	0.366189	0.425	0.068	5.68633e-56	4.25668e-34	5.9313e-60
Lum	2.39379e-59	2.33156	0.947	0.184	4.58984e-55	3.36785e-58	1.54585	0.776	0.306	6.45753e-54	3.36785e-58	4.78757e-59
Gsn	4.41602e-33	1.7565	1	0.762	8.46727e-29	1.28847e-58	1.23997	0.966	0.824	2.47051e-54	4.41602e-33	2.57694e-58
Hmgb1	5.63305e-16	-0.741867	1	0.997	1.08008e-11	9.07875e-57	-0.8282	0.989	0.998	1.74076e-52	5.63305e-16	1.81575e-56
Pamr1	6.69531e-16	0.28102	0.263	0.038	1.28376e-11	2.28366e-56	0.284606	0.282	0.029	4.37868e-52	6.69531e-16	4.56731e-56
Aes	4.60885e-19	0.682047	0.982	0.749	8.83702e-15	2.67362e-56	0.836983	0.989	0.809	5.12639e-52	4.60885e-19	5.34724e-56
Col1a2	8.75408e-34	1.74883	1	0.972	1.67851e-29	6.47709e-56	1.20131	0.966	0.984	1.24192e-51	8.75408e-34	1.29542e-55
Arhgap20	1.02053e-45	0.577145	0.526	0.051	1.95676e-41	1.36882e-55	0.498387	0.471	0.09	2.62458e-51	1.02053e-45	2.73764e-55
Cfl1	2.13626e-17	-0.577776	0.982	0.997	4.09606e-13	7.65095e-55	-0.589771	0.994	0.997	1.46699e-50	2.13626e-17	1.53019e-54
Ogn	1.28068e-23	1.02663	0.947	0.476	2.45557e-19	3.6883e-54	1.08664	0.879	0.503	7.07196e-50	1.28068e-23	7.37661e-54
Tpm4	4.89169e-20	-0.822081	0.842	0.965	9.37932e-16	3.98807e-54	-0.762264	0.839	0.972	7.64673e-50	4.89169e-20	7.97615e-54
Col6a1	1.38058e-24	0.958393	1	0.654	2.64712e-20	4.07229e-54	1.0329	0.931	0.72	7.80822e-50	1.38058e-24	8.14459e-54
S100a16	2.88003e-32	1.12828	0.877	0.321	5.52218e-28	5.69926e-54	0.941335	0.805	0.389	1.09278e-49	2.88003e-32	1.13985e-53
Acta2	4.42872e-14	-2.4697	0.526	0.839	8.49163e-10	9.77074e-54	-2.44736	0.489	0.888	1.87344e-49	4.42872e-14	1.95415e-53
Col9a1	1.23606e-53	1.02087	0.456	0.03	2.37002e-49	2.49437e-34	0.838631	0.287	0.055	4.7827e-30	2.49437e-34	2.47212e-53
Hnrnpa1	4.53038e-22	-0.783307	0.965	0.99	8.68655e-18	1.54091e-53	-0.703982	0.931	0.988	2.95453e-49	4.53038e-22	3.08181e-53
Nfib	2.20517e-27	1.01007	0.982	0.636	4.2282e-23	3.04698e-53	0.855526	0.937	0.751	5.84228e-49	2.20517e-27	6.09396e-53
Fth1	2.42795e-21	0.586067	1	1	4.65536e-17	8.65585e-53	0.476527	1	0.999	1.65967e-48	2.42795e-21	1.73117e-52
Bace2	2.07479e-52	0.476222	0.386	0.019	3.97819e-48	1.07497e-51	0.510831	0.339	0.049	2.06114e-47	1.07497e-51	4.14957e-52
Smoc2	9.8726e-25	0.820665	0.649	0.145	1.89297e-20	2.29114e-52	0.964889	0.684	0.221	4.39303e-48	9.8726e-25	4.58228e-52
Fhl2	1.1048e-20	-1.07051	0.281	0.855	2.11835e-16	3.03894e-52	-1.00694	0.247	0.807	5.82686e-48	1.1048e-20	6.07787e-52
Ebf3	7.99236e-24	0.384287	0.439	0.069	1.53246e-19	3.28075e-52	0.340914	0.397	0.068	6.2905e-48	7.99236e-24	6.56149e-52
Cnn2	1.24227e-16	-0.899854	0.632	0.932	2.38194e-12	1.41507e-51	-0.94246	0.644	0.935	2.71325e-47	1.24227e-16	2.83014e-51
Islr	1.79128e-28	1.04186	0.982	0.586	3.43459e-24	1.63392e-51	0.806991	0.897	0.646	3.13287e-47	1.79128e-28	3.26783e-51
Col5a2	3.01486e-28	1.07348	0.982	0.703	5.78069e-24	2.1398e-51	0.906139	0.92	0.794	4.10285e-47	3.01486e-28	4.2796e-51
Mirg	5.30867e-28	0.437578	0.439	0.061	1.01788e-23	6.38281e-51	0.394093	0.477	0.101	1.22384e-46	5.30867e-28	1.27656e-50
Itm2a	4.59668e-33	1.78271	0.912	0.33	8.81367e-29	1.40827e-50	1.84194	0.828	0.453	2.70022e-46	4.59668e-33	2.81655e-50
Actn1	4.61595e-19	-0.80448	0.211	0.812	8.85062e-15	2.79818e-50	-0.755452	0.293	0.836	5.36523e-46	4.61595e-19	5.59636e-50
Vim	3.49601e-18	0.721496	1	0.998	6.70325e-14	4.50189e-50	0.704909	0.994	0.998	8.63192e-46	3.49601e-18	9.00377e-50
Hoxd11	6.3946e-15	-0.740685	0.263	0.765	1.2261e-10	4.62269e-48	-0.827266	0.224	0.777	8.86355e-44	6.3946e-15	9.24538e-48
H2afz	6.69616e-20	-1.20926	0.93	0.993	1.28392e-15	5.63531e-48	-1.15749	0.971	0.992	1.08051e-43	6.69616e-20	1.12706e-47
Antxr1	4.81983e-35	0.839278	0.737	0.163	9.24154e-31	8.69036e-48	0.581045	0.655	0.231	1.66629e-43	4.81983e-35	1.73807e-47
Gucy1a1	1.33038e-24	-1.4199	0.316	0.915	2.55087e-20	2.17608e-47	-1.05572	0.351	0.836	4.17242e-43	1.33038e-24	4.35216e-47
Cfh	1.09315e-14	-0.989335	0.474	0.857	2.09601e-10	1.70653e-46	-1.10748	0.305	0.815	3.27211e-42	1.09315e-14	3.41307e-46
Tpm2	1.27572e-13	-1.246	0.737	0.952	2.44607e-09	2.7378e-46	-1.23943	0.621	0.956	5.24945e-42	1.27572e-13	5.47559e-46
Arsi	1.21385e-24	0.335787	0.456	0.071	2.32744e-20	4.19234e-46	0.308112	0.402	0.077	8.03838e-42	1.21385e-24	8.38467e-46
Qpct	3.05932e-29	0.422103	0.404	0.046	5.86594e-25	4.33047e-46	0.362395	0.351	0.059	8.30325e-42	3.05932e-29	8.66094e-46
Pcolce	6.34685e-19	0.993785	0.947	0.717	1.21694e-14	1.10511e-43	0.79523	0.966	0.769	2.11893e-39	6.34685e-19	2.21021e-43
Col14a1	1.24628e-27	1.26005	0.965	0.443	2.38962e-23	1.49127e-43	0.965214	0.891	0.523	2.85935e-39	1.24628e-27	2.98253e-43
Tbx18	3.50246e-35	0.597071	0.596	0.087	6.71561e-31	1.72855e-43	0.463072	0.448	0.102	3.31433e-39	3.50246e-35	3.45711e-43
Nrk	5.67488e-17	0.840969	0.614	0.203	1.0881e-12	2.70701e-43	1.15917	0.701	0.316	5.19042e-39	5.67488e-17	5.41402e-43
Epb41l3	1.1546e-16	0.338042	0.421	0.092	2.21383e-12	6.88534e-43	0.392051	0.511	0.141	1.3202e-38	1.1546e-16	1.37707e-42
H19	1.08935e-14	0.764767	1	0.813	2.08871e-10	1.59199e-42	0.822003	0.983	0.884	3.05247e-38	1.08935e-14	3.18397e-42
Tmed3	3.96432e-17	0.681181	0.912	0.667	7.60119e-13	2.18667e-42	0.724137	0.879	0.702	4.19272e-38	3.96432e-17	4.37334e-42
Mxra8	5.60044e-14	0.549662	0.86	0.508	1.07383e-09	3.04889e-42	0.667339	0.891	0.569	5.84594e-38	5.60044e-14	6.09778e-42
Ifitm2	1.66183e-11	0.363625	0.982	0.993	3.18639e-07	3.75094e-42	0.456552	0.989	0.993	7.19205e-38	1.66183e-11	7.50188e-42
Col6a2	3.02044e-22	0.931432	1	0.648	5.7914e-18	4.3005e-42	0.867004	0.931	0.715	8.24578e-38	3.02044e-22	8.601e-42
Ybx1	4.4845e-13	-0.47893	1	0.992	8.59859e-09	9.2523e-42	-0.531012	0.977	0.998	1.77404e-37	4.4845e-13	1.85046e-41
Ctsl	1.90181e-22	0.792025	0.982	0.912	3.64654e-18	1.9017e-41	0.74838	0.989	0.924	3.64632e-37	1.90181e-22	3.8034e-41
Gas1	1.05247e-20	1.04252	0.965	0.661	2.01801e-16	2.02049e-41	0.833447	0.897	0.642	3.87408e-37	1.05247e-20	4.04098e-41
S100a10	1.76616e-14	0.755391	1	0.897	3.38643e-10	2.84857e-41	0.778793	0.989	0.927	5.46185e-37	1.76616e-14	5.69714e-41
Sox9	4.27663e-32	0.623218	0.386	0.039	8.20001e-28	3.22264e-41	0.510334	0.356	0.072	6.17909e-37	4.27663e-32	6.44528e-41
Set	7.1097e-15	-0.589288	0.947	0.982	1.36321e-10	1.40285e-40	-0.583699	0.943	0.986	2.68983e-36	7.1097e-15	2.80571e-40
Hnrnpd	1.13307e-10	-0.498947	0.93	0.945	2.17255e-06	1.75206e-40	-0.606972	0.856	0.965	3.3594e-36	1.13307e-10	3.50412e-40
Fmo2	2.58275e-40	0.653967	0.421	0.035	4.95217e-36	5.67999e-27	0.445359	0.23	0.042	1.08908e-22	5.67999e-27	5.16551e-40
Col5a1	8.73884e-25	0.967673	0.947	0.561	1.67559e-20	4.56863e-40	0.765361	0.885	0.627	8.7599e-36	8.73884e-25	9.13727e-40
Srsf3	3.79693e-11	-0.554806	0.895	0.969	7.28024e-07	1.83637e-39	-0.600987	0.914	0.988	3.52105e-35	3.79693e-11	3.67273e-39
Gatsl3	2.73873e-39	0.409686	0.421	0.036	5.25123e-35	6.69872e-35	0.270534	0.328	0.067	1.28441e-30	6.69872e-35	5.47745e-39
Rasgrp2	1.46692e-13	-0.807498	0.246	0.734	2.81268e-09	6.7738e-39	-0.781413	0.218	0.74	1.29881e-34	1.46692e-13	1.35476e-38
Lgals1	7.10783e-16	0.609235	1	0.991	1.36286e-11	1.55862e-38	0.54952	0.983	0.997	2.98851e-34	7.10783e-16	3.11725e-38
Ran	2.05795e-14	-0.780112	0.912	0.968	3.94592e-10	1.63783e-38	-0.747073	0.943	0.979	3.14037e-34	2.05795e-14	3.27565e-38
S100a6	7.72142e-20	1.23915	0.965	0.831	1.48051e-15	2.00892e-38	0.989168	0.908	0.872	3.8519e-34	7.72142e-20	4.01784e-38
Cst3	2.09472e-19	0.856076	1	0.929	4.01641e-15	2.22743e-38	0.755067	0.983	0.956	4.27088e-34	2.09472e-19	4.45486e-38
Cd44	6.03132e-08	0.262448	0.211	0.048	0.00115645	2.28756e-38	0.332246	0.345	0.07	4.38617e-34	6.03132e-08	4.57512e-38
Hnrnpa3	5.58819e-11	-0.547923	0.86	0.957	1.07148e-06	4.18784e-38	-0.564986	0.931	0.987	8.02976e-34	5.58819e-11	8.37568e-38
Nenf	2.36456e-13	0.502358	1	0.927	4.53382e-09	9.2301e-38	0.483861	0.983	0.957	1.76978e-33	2.36456e-13	1.84602e-37
Ccnd3	2.71357e-08	0.473165	0.947	0.774	0.0005203	9.69503e-38	0.591269	0.948	0.843	1.85893e-33	2.71357e-08	1.93901e-37
Fstl1	8.49972e-22	0.769694	1	0.934	1.62974e-17	1.20951e-37	0.669202	0.966	0.964	2.31912e-33	8.49972e-22	2.41903e-37
Rnase4	2.9841e-16	0.56286	0.596	0.202	5.72172e-12	1.64976e-37	0.588484	0.644	0.263	3.16324e-33	2.9841e-16	3.29951e-37
Serbp1	4.29862e-14	-0.494103	0.982	0.996	8.24217e-10	5.30101e-37	-0.439049	0.989	0.996	1.01642e-32	4.29862e-14	1.0602e-36
Ndn	9.85548e-17	0.699107	0.93	0.66	1.88969e-12	5.47411e-37	0.801495	0.914	0.779	1.04961e-32	9.85548e-17	1.09482e-36
Mmp23	3.22706e-19	0.796386	0.772	0.321	6.18757e-15	1.25493e-36	0.701841	0.747	0.381	2.4062e-32	3.22706e-19	2.50985e-36
Pcdh7	1.33932e-36	0.612014	0.667	0.109	2.568e-32	1.44937e-27	0.319625	0.466	0.155	2.77901e-23	1.44937e-27	2.67863e-36
Clec11a	2.24119e-36	0.601225	0.491	0.059	4.29726e-32	2.70163e-17	0.321434	0.276	0.089	5.1801e-13	2.70163e-17	4.48239e-36
Ppia	1.70727e-14	-0.406189	1	0.999	3.27353e-10	2.28699e-36	-0.365279	1	1	4.38507e-32	1.70727e-14	4.57397e-36
Itih5	8.19372e-33	1.16241	0.842	0.255	1.57106e-28	3.10213e-36	0.912192	0.638	0.287	5.94803e-32	8.19372e-33	6.20427e-36
Prmt1	2.19431e-12	-0.528388	0.825	0.943	4.20737e-08	4.79861e-36	-0.538176	0.856	0.964	9.20086e-32	2.19431e-12	9.59723e-36
Cald1	3.85551e-12	-0.573744	0.982	0.995	7.39255e-08	5.65306e-36	-0.671668	0.948	0.993	1.08392e-31	3.85551e-12	1.13061e-35
Cd63	1.24825e-09	0.34165	1	0.992	2.39339e-05	7.55095e-36	0.415367	1	0.995	1.44782e-31	1.24825e-09	1.51019e-35
Serpinb6a	2.55828e-12	0.660042	0.877	0.695	4.90524e-08	7.95707e-36	0.706442	0.943	0.753	1.52569e-31	2.55828e-12	1.59141e-35
Lmna	9.28756e-17	0.679451	0.947	0.636	1.7808e-12	8.36454e-36	0.646428	0.937	0.702	1.60382e-31	9.28756e-17	1.67291e-35
Atp1b1	5.6377e-10	0.497192	0.474	0.182	1.08097e-05	1.04388e-35	0.552236	0.448	0.128	2.00153e-31	5.6377e-10	2.08775e-35
Pmp22	1.96632e-18	0.729234	0.947	0.558	3.77023e-14	1.50966e-35	0.640834	0.908	0.619	2.89462e-31	1.96632e-18	3.01932e-35
Vkorc1	1.43084e-15	0.694197	0.86	0.565	2.74349e-11	1.56201e-35	0.543878	0.868	0.573	2.99499e-31	1.43084e-15	3.12401e-35
Ddx5	3.36536e-12	-0.473804	0.93	0.985	6.45275e-08	1.70637e-35	-0.457009	0.966	0.992	3.27178e-31	3.36536e-12	3.41273e-35
1500015O10Rik	1.96804e-19	0.580936	0.368	0.062	3.77351e-15	2.00714e-35	0.718886	0.385	0.097	3.84849e-31	1.96804e-19	4.01428e-35
H3f3a	3.12657e-17	-0.379084	1	1	5.99488e-13	2.10413e-35	-0.284299	0.994	1	4.03445e-31	3.12657e-17	4.20825e-35
Igfbp6	2.98535e-07	0.97657	0.298	0.1	0.00572411	2.44244e-35	1.09456	0.46	0.138	4.68313e-31	2.98535e-07	4.88487e-35
Matn2	4.37488e-32	1.51012	0.965	0.494	8.38839e-28	1.26907e-34	0.895302	0.816	0.572	2.43332e-30	4.37488e-32	2.53815e-34
Lpar1	5.44015e-13	0.628226	0.772	0.416	1.0431e-08	1.36178e-34	0.634962	0.77	0.44	2.61108e-30	5.44015e-13	2.72357e-34
Col6a3	1.60728e-18	0.819673	0.947	0.609	3.0818e-14	2.28984e-34	0.762375	0.862	0.641	4.39054e-30	1.60728e-18	4.57968e-34
2022-09-07	1.35616e-17	-0.762515	0.947	0.985	2.6003e-13	2.32334e-34	-0.584828	0.96	0.989	4.45476e-30	1.35616e-17	4.64667e-34
Calml4	2.80226e-16	0.659263	0.754	0.368	5.37305e-12	2.46953e-34	0.613031	0.741	0.392	4.73508e-30	2.80226e-16	4.93906e-34
Igfbp7	4.34671e-05	-0.533973	0.842	0.95	0.833437	4.69076e-34	-0.86932	0.736	0.966	8.99407e-30	4.34671e-05	9.38153e-34
Fbn2	1.24947e-10	0.748009	0.947	0.769	2.39574e-06	6.07265e-34	0.764957	0.902	0.792	1.16437e-29	1.24947e-10	1.21453e-33
Hnrnpm	1.07486e-09	-0.454158	0.807	0.928	2.06093e-05	7.32159e-34	-0.490399	0.839	0.952	1.40384e-29	1.07486e-09	1.46432e-33
Pbx1	1.81882e-11	-0.668758	0.825	0.945	3.48741e-07	8.02218e-34	-0.692328	0.828	0.955	1.53817e-29	1.81882e-11	1.60444e-33
Slc25a5	1.57201e-13	-0.738118	0.544	0.855	3.01417e-09	1.77415e-33	-0.706899	0.632	0.874	3.40175e-29	1.57201e-13	3.54829e-33
Actg1	7.67164e-12	-0.404078	0.982	0.999	1.47096e-07	3.92717e-33	-0.419633	0.994	1	7.52995e-29	7.67164e-12	7.85433e-33
Pfn1	1.89544e-13	-0.530905	0.93	0.993	3.63433e-09	5.18212e-33	-0.446467	0.989	0.995	9.93621e-29	1.89544e-13	1.03642e-32
Ntrk2	1.06041e-30	0.60514	0.702	0.145	2.03322e-26	7.1516e-33	0.464859	0.511	0.166	1.37125e-28	1.06041e-30	1.43032e-32
C1qtnf2	1.83688e-13	0.476275	0.614	0.235	3.52204e-09	9.85795e-33	0.506303	0.695	0.33	1.89016e-28	1.83688e-13	1.97159e-32
Lsm4	8.27467e-06	-0.34063	0.807	0.874	0.158658	1.02995e-32	-0.559197	0.626	0.882	1.97482e-28	8.27467e-06	2.0599e-32
Prdx2	4.77754e-11	-0.3892	0.947	0.99	9.16046e-07	1.24564e-32	-0.407548	0.977	0.995	2.38839e-28	4.77754e-11	2.49128e-32
Adh1	2.57922e-13	0.30092	0.386	0.089	4.9454e-09	1.31332e-32	0.469116	0.356	0.084	2.51816e-28	2.57922e-13	2.62664e-32
Clic1	1.11338e-06	0.332379	0.965	0.968	0.0213479	1.65101e-32	0.40589	0.994	0.981	3.16564e-28	1.11338e-06	3.30201e-32
Cox5a	2.39071e-11	-0.473434	0.842	0.946	4.58395e-07	1.85123e-32	-0.517872	0.828	0.956	3.54954e-28	2.39071e-11	3.70245e-32
Itga9	4.01092e-07	-0.381423	0.263	0.64	0.00769053	2.36422e-32	-0.525336	0.241	0.716	4.53316e-28	4.01092e-07	4.72845e-32
Aqp1	2.5979e-32	0.51906	0.421	0.047	4.98122e-28	3.40854e-25	0.352101	0.259	0.057	6.53554e-21	3.40854e-25	5.19581e-32
Fcgrt	4.56155e-17	0.698824	0.93	0.769	8.74631e-13	2.79433e-32	0.528969	0.925	0.77	5.35785e-28	4.56155e-17	5.58866e-32
Mest	1.16488e-12	0.642342	0.982	0.856	2.23353e-08	3.85138e-32	0.669744	0.994	0.929	7.38464e-28	1.16488e-12	7.70276e-32
Rpl5	1.02408e-08	-0.25466	1	0.999	0.000196358	4.08558e-32	-0.296017	1	0.999	7.83368e-28	1.02408e-08	8.17115e-32
Hmgb3	1.92787e-13	-0.68323	0.351	0.765	3.69649e-09	1.68282e-31	-0.621737	0.42	0.807	3.22664e-27	1.92787e-13	3.36564e-31
Kcnq1ot1	1.45222e-10	0.690737	0.965	0.867	2.78448e-06	1.86122e-31	0.820611	0.971	0.921	3.56871e-27	1.45222e-10	3.72244e-31
Sfrp2	9.35376e-11	0.639748	0.632	0.242	1.79349e-06	3.62009e-31	0.489844	0.718	0.288	6.94117e-27	9.35376e-11	7.24019e-31
Vcan	1.21894e-14	0.754734	0.807	0.458	2.33719e-10	4.03541e-31	0.900551	0.782	0.537	7.7375e-27	1.21894e-14	8.07082e-31
Nfix	5.02382e-19	0.606354	0.982	0.825	9.63268e-15	4.28758e-31	0.516352	0.943	0.868	8.22101e-27	5.02382e-19	8.57517e-31
Tbrg1	6.0009e-11	0.468168	0.895	0.765	1.15061e-06	4.56503e-31	0.477644	0.954	0.815	8.753e-27	6.0009e-11	9.13007e-31
Timp2	2.93397e-21	0.885212	0.965	0.754	5.62559e-17	5.28386e-31	0.722028	0.92	0.81	1.01313e-26	2.93397e-21	1.05677e-30
Mylk	1.26661e-08	-0.910744	0.491	0.829	0.000242861	9.01342e-31	-1.05787	0.425	0.842	1.72823e-26	1.26661e-08	1.80268e-30
Gnas	2.42574e-14	0.482389	1	0.999	4.65111e-10	1.27344e-30	0.461202	1	1	2.44169e-26	2.42574e-14	2.54688e-30
Sumo2	1.99611e-07	-0.319895	0.947	0.99	0.00382733	1.49245e-30	-0.370728	0.971	0.994	2.86163e-26	1.99611e-07	2.98491e-30
Flna	2.7908e-09	-0.534038	0.772	0.912	5.35108e-05	1.90346e-30	-0.584088	0.741	0.935	3.6497e-26	2.7908e-09	3.80693e-30
Ctsk	2.68545e-09	0.389267	0.386	0.13	5.14909e-05	2.22154e-30	0.384334	0.437	0.133	4.25959e-26	2.68545e-09	4.44309e-30
H2afv	1.04239e-11	-0.57166	0.93	0.976	1.99867e-07	2.32276e-30	-0.535113	0.931	0.984	4.45367e-26	1.04239e-11	4.64553e-30
Rasl11a	9.28112e-11	-0.706495	0.14	0.598	1.77956e-06	2.97977e-30	-0.673442	0.121	0.586	5.7134e-26	9.28112e-11	5.95953e-30
Jund	1.73048e-17	0.730027	1	0.965	3.31802e-13	3.08142e-30	0.59941	0.989	0.975	5.90831e-26	1.73048e-17	6.16283e-30
Cdc42ep2	9.98986e-12	0.505616	0.719	0.338	1.91546e-07	3.48249e-30	0.574881	0.69	0.379	6.67733e-26	9.98986e-12	6.96498e-30
Myl9	7.33219e-12	-1.19032	0.632	0.889	1.40587e-07	5.95355e-30	-1.06866	0.678	0.91	1.14153e-25	7.33219e-12	1.19071e-29
Cpe	1.86798e-16	0.708065	0.719	0.303	3.58167e-12	6.43773e-30	0.682734	0.69	0.366	1.23437e-25	1.86798e-16	1.28755e-29
Fubp1	1.74305e-14	-0.657135	0.474	0.88	3.34213e-10	8.1959e-30	-0.483853	0.69	0.907	1.57148e-25	1.74305e-14	1.63918e-29
Smim1	7.12984e-16	0.445256	0.561	0.175	1.36708e-11	1.08182e-29	0.468381	0.534	0.201	2.07428e-25	7.12984e-16	2.16364e-29
Meis2	1.29262e-07	-0.473566	0.895	0.955	0.00247847	1.14323e-29	-0.546927	0.764	0.948	2.19202e-25	1.29262e-07	2.28645e-29
Fbn1	3.68788e-14	0.826624	0.86	0.599	7.07115e-10	1.2788e-29	0.82712	0.851	0.677	2.45197e-25	3.68788e-14	2.5576e-29
Sntb2	1.21946e-15	0.548895	0.807	0.413	2.33819e-11	1.62177e-29	0.438698	0.787	0.463	3.10959e-25	1.21946e-15	3.24355e-29
Csrp1	3.91833e-10	-0.677761	0.474	0.81	7.513e-06	2.33055e-29	-0.675316	0.5	0.836	4.4686e-25	3.91833e-10	4.66111e-29
Dkk2	3.52788e-13	0.426174	0.649	0.219	6.76435e-09	2.61375e-29	0.575024	0.592	0.231	5.0116e-25	3.52788e-13	5.2275e-29
Maf	8.15537e-27	0.787892	0.825	0.24	1.56371e-22	3.37175e-29	0.597485	0.672	0.31	6.46499e-25	8.15537e-27	6.74349e-29
Srsf7	2.85419e-06	-0.408133	0.684	0.812	0.0547262	3.69039e-29	-0.550847	0.655	0.874	7.07595e-25	2.85419e-06	7.38078e-29
Clcn5	2.211e-14	0.359005	0.421	0.103	4.23938e-10	4.40483e-29	0.356819	0.42	0.133	8.44582e-25	2.211e-14	8.80966e-29
Cavin2	6.24839e-29	0.696002	0.737	0.161	1.19807e-24	2.08392e-22	0.378798	0.437	0.155	3.99571e-18	2.08392e-22	1.24968e-28
Hsp90ab1	5.05885e-18	-0.38555	1	1	9.69984e-14	6.69383e-29	-0.288573	1	1	1.28347e-24	5.05885e-18	1.33877e-28
Lbh	1.8586e-10	-0.61646	0.404	0.784	3.56367e-06	1.10406e-28	-0.602952	0.362	0.762	2.11693e-24	1.8586e-10	2.20813e-28
Rrbp1	2.0596e-16	0.598304	0.982	0.933	3.94907e-12	1.1595e-28	0.478536	0.977	0.966	2.22323e-24	2.0596e-16	2.31901e-28
Nr2f2	4.02603e-07	-0.431723	0.702	0.943	0.0077195	1.2534e-28	-0.562666	0.713	0.947	2.40328e-24	4.02603e-07	2.50681e-28
Rps16	3.35636e-15	-0.318306	1	1	6.43549e-11	1.72192e-28	-0.261347	0.994	0.999	3.30161e-24	3.35636e-15	3.44384e-28
Sulf2	7.6445e-14	0.418339	0.544	0.186	1.46576e-09	1.76698e-28	0.372641	0.552	0.216	3.38801e-24	7.6445e-14	3.53396e-28
Peg3	7.08494e-10	0.73753	0.912	0.808	1.35847e-05	2.16402e-28	0.685688	0.971	0.869	4.14929e-24	7.08494e-10	4.32804e-28
Lpl	9.19621e-07	0.620675	0.421	0.186	0.0176328	2.72079e-28	0.819607	0.54	0.231	5.21684e-24	9.19621e-07	5.44158e-28
Plagl1	1.55174e-05	0.803466	0.667	0.568	0.297531	2.80678e-28	1.16839	0.787	0.644	5.38172e-24	1.55174e-05	5.61356e-28
Eva1b	3.1814e-12	-0.539794	0.965	0.956	6.10002e-08	7.62941e-28	-0.486544	0.897	0.962	1.46286e-23	3.1814e-12	1.52588e-27
Kctd12	1.21702e-13	0.584622	0.649	0.252	2.33352e-09	7.74958e-28	0.480751	0.615	0.278	1.4859e-23	1.21702e-13	1.54992e-27
Vat1	1.9459e-12	0.469529	0.579	0.228	3.73106e-08	1.04489e-27	0.396988	0.586	0.249	2.00347e-23	1.9459e-12	2.08978e-27
Add3	2.68706e-19	0.756895	0.947	0.697	5.15216e-15	1.0706e-27	0.552675	0.885	0.732	2.05277e-23	2.68706e-19	2.1412e-27
Myo1b	2.60922e-14	-0.677404	0.123	0.649	5.00291e-10	1.35294e-27	-0.481415	0.195	0.629	2.59413e-23	2.60922e-14	2.70588e-27
Sparcl1	4.85357e-12	0.562603	0.895	0.584	9.30623e-08	2.05462e-27	0.567364	0.897	0.687	3.93953e-23	4.85357e-12	4.10924e-27
Hdgf	8.87711e-08	-0.452267	0.772	0.868	0.0017021	2.07269e-27	-0.482281	0.684	0.894	3.97418e-23	8.87711e-08	4.14539e-27
Hnrnpk	1.24466e-15	-0.499832	0.965	0.993	2.38651e-11	2.64861e-27	-0.350045	0.989	0.993	5.07845e-23	1.24466e-15	5.29722e-27
Alcam	1.30017e-09	-0.73877	0.474	0.785	2.49294e-05	2.66291e-27	-0.752096	0.5	0.827	5.10586e-23	1.30017e-09	5.32582e-27
Rras	1.28937e-09	0.374569	0.912	0.603	2.47224e-05	3.56378e-27	0.421173	0.851	0.578	6.83319e-23	1.28937e-09	7.12756e-27
Sfpq	1.72855e-09	-0.532515	0.772	0.877	3.31431e-05	4.23262e-27	-0.506432	0.793	0.926	8.11562e-23	1.72855e-09	8.46524e-27
P4ha2	9.84527e-14	0.561586	0.754	0.379	1.88773e-09	4.25268e-27	0.503873	0.695	0.402	8.15408e-23	9.84527e-14	8.50535e-27
Hnrnpa2b1	9.67546e-07	-0.371226	0.947	0.983	0.0185517	4.28878e-27	-0.441912	0.96	0.988	8.22332e-23	9.67546e-07	8.57757e-27
Rabac1	9.54706e-08	0.38355	0.93	0.839	0.00183055	4.31352e-27	0.445504	0.966	0.867	8.27074e-23	9.54706e-08	8.62703e-27
Pkm	9.40527e-14	-0.635948	0.93	0.982	1.80337e-09	4.3487e-27	-0.53223	0.92	0.969	8.33819e-23	9.40527e-14	8.69739e-27
Sulf1	5.60748e-23	0.420948	0.421	0.065	1.07518e-18	4.55118e-27	0.320404	0.345	0.088	8.72643e-23	5.60748e-23	9.10235e-27
Sema3c	6.62877e-15	0.6222	0.667	0.235	1.271e-10	5.00019e-27	0.701094	0.552	0.239	9.58736e-23	6.62877e-15	1.00004e-26
Ahnak	4.30082e-05	0.527728	0.789	0.661	0.82464	5.23669e-27	0.618908	0.891	0.688	1.00408e-22	4.30082e-05	1.04734e-26
Tmem59	1.38393e-06	0.288165	0.93	0.899	0.0265355	5.34844e-27	0.401951	0.954	0.92	1.02551e-22	1.38393e-06	1.06969e-26
Myh9	5.84329e-08	-0.496383	0.316	0.672	0.00112039	5.77157e-27	-0.526469	0.241	0.675	1.10664e-22	5.84329e-08	1.15431e-26
Cebpd	1.7239e-12	0.776409	0.86	0.548	3.3054e-08	6.36933e-27	0.806119	0.776	0.525	1.22126e-22	1.7239e-12	1.27387e-26
Top1	1.31624e-10	-0.443224	0.895	0.973	2.52375e-06	6.88986e-27	-0.412855	0.925	0.984	1.32106e-22	1.31624e-10	1.37797e-26
Rcn3	1.61649e-14	0.546516	1	0.929	3.09946e-10	7.14475e-27	0.466937	0.966	0.963	1.36993e-22	1.61649e-14	1.42895e-26
Plcb4	1.20434e-16	0.426238	0.456	0.105	2.30919e-12	7.73935e-27	0.275497	0.385	0.109	1.48394e-22	1.20434e-16	1.54787e-26
Gm42418	9.15753e-12	0.604549	1	1	1.75586e-07	8.67603e-27	0.367063	1	1	1.66354e-22	9.15753e-12	1.73521e-26
Csrp2	3.90178e-18	0.799199	0.982	0.828	7.48128e-14	9.44549e-27	0.609152	0.897	0.866	1.81108e-22	3.90178e-18	1.8891e-26
Crabp1	6.31327e-06	0.58623	0.281	0.1	0.121051	2.15885e-26	0.965657	0.443	0.162	4.13937e-22	6.31327e-06	4.31769e-26
Eno1	5.0836e-12	-0.594784	0.754	0.966	9.7473e-08	3.18816e-26	-0.451243	0.891	0.963	6.11297e-22	5.0836e-12	6.37631e-26
Adamts2	1.38529e-11	0.332274	0.439	0.131	2.65615e-07	4.08636e-26	0.32419	0.529	0.199	7.83518e-22	1.38529e-11	8.17272e-26
Bzw2	0.000312585	-0.255963	0.614	0.785	1	4.24905e-26	-0.498011	0.552	0.842	8.14713e-22	0.000312585	8.4981e-26
Tbx2	1.50888e-11	-0.677147	0.07	0.545	2.89312e-07	5.4734e-26	-0.574916	0.092	0.516	1.04947e-21	1.50888e-11	1.09468e-25
AW551984	1.11169e-08	0.3023	0.333	0.105	0.000213156	1.0961e-25	0.270542	0.385	0.118	2.10167e-21	1.11169e-08	2.1922e-25
Kitl	3.20498e-13	0.591486	0.421	0.123	6.14523e-09	1.41017e-25	0.414497	0.362	0.109	2.70386e-21	3.20498e-13	2.82034e-25
Snrpf	4.03672e-10	-0.502343	0.789	0.904	7.74001e-06	2.83928e-25	-0.428646	0.833	0.945	5.44403e-21	4.03672e-10	5.67856e-25
Map1b	6.0867e-13	0.438683	0.702	0.273	1.16706e-08	3.76399e-25	0.414428	0.672	0.317	7.21707e-21	6.0867e-13	7.52797e-25
Gstm1	1.29709e-09	0.489243	0.754	0.451	2.48703e-05	3.96565e-25	0.576735	0.741	0.446	7.60374e-21	1.29709e-09	7.9313e-25
Zim1	6.98566e-10	0.262881	0.351	0.098	1.33943e-05	4.72875e-25	0.347767	0.431	0.152	9.0669e-21	6.98566e-10	9.45749e-25
Atp5g2	3.56228e-13	-0.474535	0.895	0.992	6.83032e-09	5.27812e-25	-0.346242	0.96	0.993	1.01203e-20	3.56228e-13	1.05562e-24
Hnrnpab	1.69974e-08	-0.471862	0.649	0.864	0.000325909	5.57909e-25	-0.46081	0.753	0.917	1.06973e-20	1.69974e-08	1.11582e-24
Lhfp	2.61258e-15	-0.728248	0.561	0.895	5.00936e-11	7.34573e-25	-0.483828	0.592	0.862	1.40847e-20	2.61258e-15	1.46915e-24
Igfbp4	3.35578e-11	0.561878	0.947	0.904	6.43437e-07	7.68528e-25	0.471113	0.96	0.948	1.47358e-20	3.35578e-11	1.53706e-24
Slc16a2	1.30254e-12	0.573355	0.649	0.296	2.49749e-08	8.56392e-25	0.478774	0.546	0.261	1.64205e-20	1.30254e-12	1.71278e-24
Cavin3	6.57626e-17	0.683729	0.895	0.416	1.26093e-12	9.23746e-25	0.434109	0.839	0.521	1.77119e-20	6.57626e-17	1.84749e-24
Sfr1	6.52945e-09	0.388201	0.982	0.937	0.000125196	1.10388e-24	0.395271	0.989	0.978	2.11658e-20	6.52945e-09	2.20776e-24
Fblim1	2.96859e-08	-0.420516	0.14	0.507	0.000569198	1.23185e-24	-0.419506	0.115	0.542	2.36196e-20	2.96859e-08	2.46371e-24
Rpsa	6.93112e-09	-0.255968	1	1	0.000132897	2.02663e-24	-0.262093	1	1	3.88586e-20	6.93112e-09	4.05326e-24
Rbpms	3.91099e-09	-0.535364	0.702	0.88	7.49894e-05	2.32446e-24	-0.508003	0.638	0.884	4.45691e-20	3.91099e-09	4.64891e-24
Cbx1	1.15755e-07	-0.40321	0.754	0.916	0.00221948	2.7332e-24	-0.396506	0.851	0.94	5.24063e-20	1.15755e-07	5.46639e-24
Hmcn1	3.50205e-11	-0.820213	0.263	0.702	6.71483e-07	2.88338e-24	-0.723332	0.322	0.688	5.5286e-20	3.50205e-11	5.76677e-24
H3f3b	3.89223e-08	-0.289704	1	1	0.000746295	3.26962e-24	-0.29907	1	0.999	6.26917e-20	3.89223e-08	6.53924e-24
Rbm3	1.08086e-08	-0.405155	0.93	0.981	0.000207245	3.53276e-24	-0.374516	0.966	0.99	6.77372e-20	1.08086e-08	7.06553e-24
Copz2	5.15985e-08	0.405579	0.877	0.698	0.000989351	4.34838e-24	0.469744	0.879	0.771	8.33759e-20	5.15985e-08	8.69677e-24
Gxylt2	3.46282e-10	0.318947	0.386	0.116	6.6396e-06	4.41022e-24	0.371607	0.425	0.149	8.45615e-20	3.46282e-10	8.82044e-24
Col4a1	2.50039e-11	-0.928488	0.684	0.891	4.79424e-07	6.42628e-24	-0.813556	0.701	0.896	1.23217e-19	2.50039e-11	1.28526e-23
Twist2	7.38783e-24	0.50063	0.579	0.125	1.41654e-19	1.66667e-21	0.376803	0.477	0.196	3.19567e-17	1.66667e-21	1.47757e-23
Ets1	1.82728e-09	-0.507201	0.088	0.513	3.50363e-05	7.64741e-24	-0.454959	0.126	0.544	1.46632e-19	1.82728e-09	1.52948e-23
Adam12	1.99544e-23	0.354291	0.491	0.086	3.82605e-19	8.1599e-24	0.278628	0.391	0.126	1.56458e-19	1.99544e-23	1.63198e-23
Stmn2	8.44114e-24	1.27596	0.158	0.007	1.6185e-19	1.95592e-18	0.83185	0.149	0.027	3.75027e-14	1.95592e-18	1.68823e-23
Fermt2	2.0927e-07	-0.47363	0.789	0.916	0.00401254	8.79617e-24	-0.500728	0.759	0.919	1.68658e-19	2.0927e-07	1.75923e-23
Fzd4	9.38207e-24	0.523272	0.579	0.124	1.79892e-19	3.42878e-21	0.296033	0.443	0.177	6.57434e-17	3.42878e-21	1.87641e-23
Pdap1	5.34963e-07	-0.343558	0.895	0.956	0.0102574	9.74942e-24	-0.378842	0.914	0.975	1.86935e-19	5.34963e-07	1.94988e-23
Fyn	6.33939e-05	0.349486	0.544	0.355	1	1.08987e-23	0.434979	0.655	0.38	2.08972e-19	6.33939e-05	2.17975e-23
Tpm1	6.36512e-07	-0.909475	0.825	0.923	0.0122045	1.0986e-23	-0.864058	0.851	0.943	2.10646e-19	6.36512e-07	2.1972e-23
Anp32a	3.09216e-07	-0.351119	0.895	0.965	0.00592891	1.3921e-23	-0.37678	0.902	0.973	2.66922e-19	3.09216e-07	2.7842e-23
Ywhae	8.25613e-09	-0.34303	0.982	0.994	0.000158303	1.48944e-23	-0.31053	0.989	0.995	2.85585e-19	8.25613e-09	2.97887e-23
Laptm4a	1.51528e-05	0.298277	0.982	0.972	0.29054	1.56908e-23	0.354029	0.989	0.978	3.00856e-19	1.51528e-05	3.13817e-23
Serpinh1	1.79227e-15	0.50796	1	0.992	3.43649e-11	1.58079e-23	0.374528	0.989	0.996	3.031e-19	1.79227e-15	3.16157e-23
S100a11	0.000246562	0.315626	0.982	0.97	1	1.66538e-23	0.458329	0.983	0.98	3.1932e-19	0.000246562	3.33076e-23
Spats2l	5.73265e-18	0.783414	0.877	0.526	1.09918e-13	1.74082e-23	0.506819	0.81	0.592	3.33785e-19	5.73265e-18	3.48164e-23
Frem1	7.95018e-07	-0.379977	0.14	0.492	0.0152437	2.26802e-23	-0.450827	0.092	0.492	4.34869e-19	7.95018e-07	4.53603e-23
Ckap4	1.8995e-07	0.35365	0.912	0.855	0.0036421	2.33437e-23	0.460732	0.937	0.915	4.47592e-19	1.8995e-07	4.66874e-23
Gpx7	1.11445e-05	0.453407	0.667	0.531	0.213684	2.41354e-23	0.499014	0.856	0.648	4.62772e-19	1.11445e-05	4.82708e-23
Fxyd7	2.46146e-23	0.6279	0.491	0.095	4.7196e-19	3.32275e-07	0.255456	0.293	0.161	0.00637105	3.32275e-07	4.92291e-23
Actr3	2.10739e-13	-0.59281	0.491	0.839	4.04071e-09	3.34974e-23	-0.417327	0.661	0.884	6.42278e-19	2.10739e-13	6.69947e-23
Stmn1	4.27276e-07	-0.844452	0.86	0.894	0.00819259	4.36841e-23	-0.702271	0.902	0.965	8.37599e-19	4.27276e-07	8.73682e-23
Selenoh	1.89704e-07	-0.579018	0.702	0.818	0.00363739	4.95418e-23	-0.566258	0.73	0.89	9.49914e-19	1.89704e-07	9.90835e-23
Oaz1	4.82017e-08	-0.260992	0.982	0.999	0.00092422	6.95287e-23	-0.260108	0.994	0.997	1.33314e-18	4.82017e-08	1.39057e-22
Mgst1	3.14927e-22	1.01238	0.772	0.301	6.03841e-18	8.05111e-23	0.740374	0.632	0.364	1.54372e-18	3.14927e-22	1.61022e-22
Tmem119	4.63859e-12	0.50584	0.649	0.277	8.89402e-08	8.6067e-23	0.459222	0.655	0.361	1.65025e-18	4.63859e-12	1.72134e-22
Tgfbr3	2.85687e-12	0.275577	0.421	0.116	5.47776e-08	8.71772e-23	0.282466	0.42	0.152	1.67154e-18	2.85687e-12	1.74354e-22
Serf2	8.79011e-11	0.330461	1	0.999	1.68542e-06	8.96589e-23	0.284876	0.989	0.997	1.71912e-18	8.79011e-11	1.79318e-22
Srsf2	3.04748e-09	-0.500612	0.719	0.886	5.84324e-05	1.22842e-22	-0.446488	0.845	0.938	2.35537e-18	3.04748e-09	2.45683e-22
Yipf3	0.000132822	0.327891	0.684	0.543	1	1.51126e-22	0.392001	0.805	0.609	2.89768e-18	0.000132822	3.02251e-22
Ncl	1.0915e-09	-0.427999	0.982	0.989	2.09284e-05	1.65781e-22	-0.399181	0.989	0.992	3.17869e-18	1.0915e-09	3.31563e-22
Itga1	2.86564e-08	-0.641601	0.14	0.519	0.000549458	2.05585e-22	-0.59963	0.132	0.516	3.94189e-18	2.86564e-08	4.11171e-22
Rpl12	5.06709e-08	-0.256309	0.982	0.999	0.000971563	2.1177e-22	-0.262403	1	1	4.06047e-18	5.06709e-08	4.23539e-22
Hmgn2	4.78608e-05	-0.419247	0.86	0.929	0.917682	2.36961e-22	-0.477181	0.891	0.965	4.54348e-18	4.78608e-05	4.73921e-22
Timp3	2.8115e-12	-0.728749	0.351	0.818	5.39077e-08	2.76564e-22	-0.466516	0.368	0.743	5.30284e-18	2.8115e-12	5.53128e-22
Anp32b	5.81426e-11	-0.525079	0.947	0.983	1.11483e-06	3.81582e-22	-0.417512	0.966	0.982	7.31645e-18	5.81426e-11	7.63164e-22
Rgs5	2.73277e-11	-0.970538	0.14	0.609	5.23982e-07	3.96895e-22	-0.751692	0.069	0.46	7.61007e-18	2.73277e-11	7.93791e-22
Cox8a	1.59918e-10	-0.352406	0.982	0.995	3.06626e-06	4.79621e-22	-0.294359	0.994	0.996	9.19625e-18	1.59918e-10	9.59241e-22
Pawr	4.10198e-07	-0.332307	0.088	0.443	0.00786514	5.61816e-22	-0.348384	0.086	0.469	1.07723e-17	4.10198e-07	1.12363e-21
Fkbp14	4.2461e-11	0.405968	0.561	0.213	8.14147e-07	6.23683e-22	0.351443	0.615	0.31	1.19585e-17	4.2461e-11	1.24737e-21
Rhoc	4.04806e-16	0.557706	0.965	0.83	7.76176e-12	6.36404e-22	0.386505	0.954	0.877	1.22024e-17	4.04806e-16	1.27281e-21
Adamts12	7.01251e-08	0.340118	0.439	0.172	0.00134458	7.22309e-22	0.340138	0.466	0.193	1.38496e-17	7.01251e-08	1.44462e-21
Bex3	0.000102046	-0.258117	0.895	0.963	1	7.49348e-22	-0.356312	0.92	0.974	1.4368e-17	0.000102046	1.4987e-21
Ace2	1.70639e-07	-0.715425	0.158	0.503	0.00327183	8.29219e-22	-0.802283	0.144	0.501	1.58995e-17	1.70639e-07	1.65844e-21
Sox4	7.10168e-06	-0.364756	0.789	0.94	0.136168	9.71364e-22	-0.448841	0.747	0.949	1.86249e-17	7.10168e-06	1.94273e-21
Lrrc17	4.52249e-06	0.37695	0.719	0.524	0.0867143	1.50923e-21	0.42339	0.782	0.543	2.8938e-17	4.52249e-06	3.01846e-21
Nme1	4.58281e-09	-0.564814	0.719	0.868	8.78707e-05	1.60668e-21	-0.477502	0.833	0.925	3.08065e-17	4.58281e-09	3.21336e-21
Col12a1	6.4575e-11	0.627501	0.877	0.508	1.23816e-06	2.18431e-21	0.578509	0.736	0.496	4.1882e-17	6.4575e-11	4.36862e-21
Fkbp11	2.40235e-21	0.606696	0.702	0.235	4.60627e-17	1.93515e-20	0.41375	0.603	0.318	3.71046e-16	1.93515e-20	4.80471e-21
Hnrnpa0	1.50634e-08	-0.348056	0.947	0.976	0.000288826	2.45385e-21	-0.316222	0.977	0.982	4.70502e-17	1.50634e-08	4.9077e-21
Tubb5	5.76681e-08	-0.503592	1	0.998	0.00110573	2.76358e-21	-0.458525	0.994	0.998	5.29888e-17	5.76681e-08	5.52716e-21
Col9a2	2.84532e-21	0.474749	0.404	0.066	5.45562e-17	1.84964e-19	0.299913	0.391	0.137	3.5465e-15	1.84964e-19	5.69065e-21
Hmgb2	7.29663e-05	-1.09564	0.86	0.881	1	2.92037e-21	-1.18813	0.822	0.896	5.59952e-17	7.29663e-05	5.84074e-21
Anp32e	2.43947e-09	-0.556394	0.351	0.67	4.67743e-05	3.16935e-21	-0.463578	0.448	0.737	6.07691e-17	2.43947e-09	6.3387e-21
Gucy1b1	1.13365e-10	-0.61557	0.158	0.587	2.17366e-06	3.28595e-21	-0.442438	0.167	0.549	6.30049e-17	1.13365e-10	6.57191e-21
Akap12	2.79437e-17	1.01893	0.982	0.861	5.35793e-13	3.54517e-21	0.802598	0.897	0.87	6.79751e-17	2.79437e-17	7.09034e-21
Dap	1.21666e-06	0.34289	0.789	0.615	0.0233282	3.55265e-21	0.354054	0.862	0.674	6.81185e-17	1.21666e-06	7.1053e-21
Eif4a1	1.91092e-12	-0.468771	0.912	0.992	3.664e-08	3.92419e-21	-0.351031	0.983	0.991	7.52425e-17	1.91092e-12	7.84839e-21
Lmnb1	1.56924e-08	-0.736329	0.421	0.686	0.000300887	5.42642e-21	-0.669159	0.546	0.772	1.04046e-16	1.56924e-08	1.08528e-20
Fkbp7	9.76809e-06	0.327357	0.719	0.535	0.187293	5.95829e-21	0.399281	0.828	0.618	1.14244e-16	9.76809e-06	1.19166e-20
Csnk1a1	3.80202e-05	-0.259349	0.895	0.963	0.728999	6.14669e-21	-0.335739	0.891	0.968	1.17857e-16	3.80202e-05	1.22934e-20
Mbd3	3.25365e-09	-0.442268	0.649	0.857	6.23855e-05	6.19211e-21	-0.373363	0.695	0.905	1.18728e-16	3.25365e-09	1.23842e-20
2022-09-11	4.75907e-13	-0.720972	0.667	0.916	9.12505e-09	6.36372e-21	-0.517566	0.759	0.909	1.22018e-16	4.75907e-13	1.27274e-20
Ssr4	3.36808e-08	0.363469	0.965	0.866	0.000645796	8.75723e-21	0.371374	0.954	0.91	1.67911e-16	3.36808e-08	1.75145e-20
Lgi2	2.77071e-18	0.626959	0.754	0.267	5.31256e-14	9.43007e-21	0.504968	0.603	0.329	1.80812e-16	2.77071e-18	1.88601e-20
Klf2	1.5615e-05	0.756495	0.579	0.407	0.299401	1.05476e-20	0.799184	0.649	0.408	2.02239e-16	1.5615e-05	2.10951e-20
Mif	7.55796e-07	-0.407065	0.93	0.975	0.0144916	1.15135e-20	-0.454278	0.937	0.974	2.2076e-16	7.55796e-07	2.3027e-20
Npm1	3.07773e-10	-0.326075	1	1	5.90124e-06	1.25092e-20	-0.30075	1	0.999	2.39852e-16	3.07773e-10	2.50184e-20
Plin3	5.689e-07	0.410492	0.754	0.551	0.0109081	1.44888e-20	0.380314	0.839	0.621	2.77809e-16	5.689e-07	2.89777e-20
Nucks1	6.53854e-07	-0.531842	0.789	0.875	0.012537	1.5908e-20	-0.528661	0.776	0.913	3.05021e-16	6.53854e-07	3.18161e-20
Tsc22d1	1.88321e-07	0.395867	0.947	0.889	0.00361088	1.62477e-20	0.461239	0.966	0.925	3.11533e-16	1.88321e-07	3.24953e-20
Itga8	4.60169e-08	-0.499111	0.123	0.507	0.000882328	2.32592e-20	-0.410763	0.092	0.476	4.45972e-16	4.60169e-08	4.65184e-20
Sema3d	3.41392e-19	0.632951	0.456	0.097	6.54584e-15	2.37204e-20	0.373751	0.362	0.13	4.54816e-16	3.41392e-19	4.74409e-20
Atp5b	1.58133e-10	-0.359637	0.982	0.993	3.03205e-06	3.9181e-20	-0.294852	0.994	0.995	7.51256e-16	1.58133e-10	7.83619e-20
Camk2n1	1.93556e-14	-0.784665	0.368	0.814	3.71125e-10	4.92585e-20	-0.519803	0.431	0.723	9.44482e-16	1.93556e-14	9.8517e-20
Oaf	0.00214146	0.278637	0.684	0.587	1	5.15754e-20	0.440936	0.828	0.706	9.88908e-16	0.00214146	1.03151e-19
Snrpb	7.13821e-09	-0.411602	0.86	0.947	0.000136868	5.98123e-20	-0.327509	0.914	0.97	1.14684e-15	7.13821e-09	1.19625e-19
Hnrnpu	6.85832e-09	-0.410344	0.895	0.945	0.000131502	5.98946e-20	-0.37526	0.914	0.964	1.14842e-15	6.85832e-09	1.19789e-19
Fign	5.59152e-06	-0.36255	0.158	0.47	0.107212	6.29873e-20	-0.403249	0.115	0.478	1.20772e-15	5.59152e-06	1.25975e-19
Ewsr1	2.49232e-07	-0.405288	0.614	0.813	0.00477878	7.04071e-20	-0.357435	0.713	0.882	1.34999e-15	2.49232e-07	1.40814e-19
Bok	1.89806e-05	-0.510493	0.281	0.539	0.363935	7.9936e-20	-0.537958	0.264	0.606	1.53269e-15	1.89806e-05	1.59872e-19
Ldb2	1.38996e-05	-0.471151	0.386	0.597	0.266511	8.0205e-20	-0.47872	0.322	0.65	1.53785e-15	1.38996e-05	1.6041e-19
Ndufs8	7.10307e-07	-0.330126	0.596	0.779	0.0136194	8.7472e-20	-0.356994	0.598	0.839	1.67719e-15	7.10307e-07	1.74944e-19
Tagln	2.70991e-05	-1.64031	0.263	0.516	0.519598	9.0606e-20	-1.54711	0.19	0.538	1.73728e-15	2.70991e-05	1.81212e-19
Srgap1	1.88391e-12	0.33106	0.456	0.136	3.61222e-08	9.41284e-20	0.2921	0.431	0.18	1.80482e-15	1.88391e-12	1.88257e-19
G3bp1	1.01698e-07	-0.419856	0.614	0.853	0.00194995	9.91311e-20	-0.365389	0.793	0.908	1.90074e-15	1.01698e-07	1.98262e-19
Cux1	7.61338e-07	-0.396527	0.368	0.654	0.0145979	1.60443e-19	-0.364631	0.333	0.687	3.07633e-15	7.61338e-07	3.20886e-19
Fuca2	1.9369e-10	0.287645	0.404	0.128	3.7138e-06	1.70347e-19	0.273993	0.374	0.14	3.26624e-15	1.9369e-10	3.40694e-19
Srsf9	1.73741e-06	-0.337201	0.754	0.882	0.0333132	2.19e-19	-0.357	0.718	0.898	4.1991e-15	1.73741e-06	4.38e-19
Gabarap	1.72166e-07	0.309835	0.982	0.983	0.00330111	2.83488e-19	0.294609	0.989	0.985	5.43559e-15	1.72166e-07	5.66975e-19
Marcksl1	3.20416e-05	-0.309206	0.842	0.953	0.614366	2.93059e-19	-0.345434	0.828	0.963	5.61912e-15	3.20416e-05	5.86119e-19
Carmn	1.94791e-05	-0.354196	0.14	0.413	0.373493	3.23428e-19	-0.44622	0.092	0.446	6.2014e-15	1.94791e-05	6.46855e-19
Ctsz	0.000320693	0.266401	0.877	0.789	1	3.23912e-19	0.356317	0.92	0.802	6.2107e-15	0.000320693	6.47825e-19
P3h1	2.89507e-10	0.365547	0.702	0.358	5.55101e-06	3.70258e-19	0.349858	0.718	0.464	7.09933e-15	2.89507e-10	7.40516e-19
Tcf21	0.000252915	-0.438701	0.667	0.779	1	3.8046e-19	-0.505232	0.391	0.729	7.29493e-15	0.000252915	7.60919e-19
Nbl1	0.15356	0.316467	0.263	0.21	1	4.20193e-19	0.555834	0.494	0.248	8.05678e-15	0.15356	8.40386e-19
Etl4	1.72732e-06	-0.391361	0.14	0.459	0.0331195	5.04858e-19	-0.408636	0.144	0.497	9.68015e-15	1.72732e-06	1.00972e-18
Top2b	4.24814e-08	-0.420215	0.456	0.769	0.000814538	5.29395e-19	-0.375405	0.586	0.822	1.01506e-14	4.24814e-08	1.05879e-18
Hnrnpf	1.10702e-11	-0.497543	0.842	0.973	2.12261e-07	5.79013e-19	-0.343086	0.943	0.981	1.1102e-14	1.10702e-11	1.15803e-18
Angptl2	1.41974e-10	0.401333	0.526	0.208	2.72222e-06	7.2618e-19	0.316229	0.517	0.254	1.39238e-14	1.41974e-10	1.45236e-18
S100a13	2.51978e-11	0.416152	0.842	0.546	4.83143e-07	1.03349e-18	0.435469	0.799	0.585	1.98161e-14	2.51978e-11	2.06698e-18
Htra3	1.06664e-14	0.354882	0.404	0.092	2.04518e-10	1.04371e-18	0.357875	0.391	0.148	2.0012e-14	1.06664e-14	2.08741e-18
Col4a2	3.9502e-10	-0.749707	0.491	0.804	7.57412e-06	1.20986e-18	-0.644326	0.592	0.809	2.31978e-14	3.9502e-10	2.41972e-18
Klf6	5.97683e-10	0.577967	0.789	0.471	1.146e-05	1.32497e-18	0.486003	0.747	0.502	2.54049e-14	5.97683e-10	2.64993e-18
Tuba1b	0.000380459	-0.442555	0.912	0.92	1	1.44666e-18	-0.511183	0.891	0.957	2.77382e-14	0.000380459	2.89331e-18
Lrpap1	1.38115e-10	0.408938	0.912	0.704	2.64822e-06	1.45108e-18	0.371413	0.856	0.767	2.7823e-14	1.38115e-10	2.90216e-18
Emilin1	5.15228e-08	-0.500275	0.807	0.891	0.000987897	1.51882e-18	-0.431119	0.776	0.918	2.91218e-14	5.15228e-08	3.03763e-18
Rarres2	2.04311e-10	0.551577	0.912	0.697	3.91745e-06	1.59563e-18	0.591876	0.839	0.689	3.05946e-14	2.04311e-10	3.19126e-18
Emcn	6.29678e-05	-0.289537	0.105	0.374	1	1.79437e-18	-0.42659	0.063	0.404	3.44052e-14	6.29678e-05	3.58873e-18
Alx1	9.86473e-06	-0.443623	0.035	0.318	0.189146	1.99943e-18	-0.512918	0.034	0.365	3.83371e-14	9.86473e-06	3.99886e-18
Lsm8	0.000161415	-0.276127	0.544	0.693	1	2.46738e-18	-0.381135	0.511	0.738	4.73095e-14	0.000161415	4.93475e-18
Psap	4.22397e-06	0.314952	0.877	0.773	0.0809904	2.48737e-18	0.336892	0.943	0.843	4.76928e-14	4.22397e-06	4.97474e-18
Selenom	4.09663e-08	0.346722	1	0.943	0.000785488	2.91099e-18	0.411184	0.931	0.959	5.58154e-14	4.09663e-08	5.82198e-18
Myo10	9.323e-07	-0.365645	0.105	0.443	0.0178759	3.19962e-18	-0.34246	0.109	0.447	6.13495e-14	9.323e-07	6.39924e-18
Id3	6.84338e-10	-0.647743	0.912	0.97	1.31215e-05	3.79133e-18	-0.541098	0.839	0.954	7.26949e-14	6.84338e-10	7.58266e-18
Rcc2	0.000152285	-0.283762	0.228	0.444	1	5.61004e-18	-0.346541	0.184	0.512	1.07567e-13	0.000152285	1.12201e-17
Cxcl12	4.25896e-14	1.22299	0.737	0.444	8.16613e-10	7.0012e-18	0.79952	0.718	0.523	1.34241e-13	4.25896e-14	1.40024e-17
Smim14	7.53301e-07	0.391117	0.772	0.572	0.0144438	8.12763e-18	0.362512	0.793	0.61	1.55839e-13	7.53301e-07	1.62553e-17
Hoxd9	9.46872e-06	-0.341848	0.158	0.458	0.181553	8.30482e-18	-0.328759	0.138	0.487	1.59237e-13	9.46872e-06	1.66096e-17
Rpl13a	6.72787e-10	-0.402373	0.947	0.965	1.29e-05	9.84125e-18	-0.328843	0.891	0.968	1.88696e-13	6.72787e-10	1.96825e-17
Creb3l1	1.43203e-11	0.48053	0.684	0.316	2.74578e-07	1.01853e-17	0.418843	0.678	0.445	1.95292e-13	1.43203e-11	2.03705e-17
Tshz2	1.04479e-13	0.618336	1	0.825	2.00328e-09	1.46944e-17	0.394484	0.954	0.884	2.8175e-13	1.04479e-13	2.93888e-17
Apoe	1.56653e-17	1.90754	0.789	0.42	3.00366e-13	1.05325e-10	0.836726	0.695	0.585	2.01951e-06	1.05325e-10	3.13305e-17
Yaf2	1.86811e-07	-0.41218	0.298	0.656	0.00358191	1.93865e-17	-0.317525	0.397	0.716	3.71717e-13	1.86811e-07	3.8773e-17
Ugdh	2.0659e-17	0.589335	0.86	0.434	3.96115e-13	9.50525e-14	0.414854	0.69	0.505	1.82254e-09	9.50525e-14	4.1318e-17
Pdgfrb	7.59123e-05	-0.485862	0.421	0.628	1	2.09694e-17	-0.548875	0.345	0.638	4.02067e-13	7.59123e-05	4.19388e-17
Ube2e3	0.000339457	-0.25694	0.789	0.851	1	2.1482e-17	-0.340817	0.661	0.876	4.11897e-13	0.000339457	4.29641e-17
Fxyd1	4.79203e-09	0.363203	0.86	0.575	9.18824e-05	2.31892e-17	0.358511	0.787	0.604	4.4463e-13	4.79203e-09	4.63784e-17
Igf2	3.54952e-05	0.264237	0.421	0.216	0.680584	2.34167e-17	0.315525	0.557	0.289	4.48992e-13	3.54952e-05	4.68334e-17
Cct4	3.22192e-09	-0.416327	0.772	0.931	6.17771e-05	2.39542e-17	-0.292929	0.874	0.956	4.59298e-13	3.22192e-09	4.79084e-17
Aebp1	2.52524e-17	0.710354	0.912	0.575	4.8419e-13	3.8099e-16	0.456969	0.753	0.624	7.3051e-12	3.8099e-16	5.05049e-17
Kdelr3	8.08174e-10	0.511279	0.772	0.458	1.54959e-05	2.54275e-17	0.363869	0.793	0.606	4.87548e-13	8.08174e-10	5.08551e-17
Tnfsf12	0.00012692	0.310763	0.561	0.368	1	2.66497e-17	0.291107	0.661	0.395	5.10981e-13	0.00012692	5.32994e-17
Ptms	7.52862e-05	-0.295565	0.982	0.991	1	3.00473e-17	-0.329518	0.971	0.994	5.76128e-13	7.52862e-05	6.00947e-17
H2afy2	2.74397e-07	-0.392094	0.544	0.758	0.00526129	3.43229e-17	-0.344251	0.557	0.817	6.58108e-13	2.74397e-07	6.86458e-17
Nucb2	1.25667e-09	0.358387	0.579	0.255	2.40953e-05	3.79684e-17	0.321579	0.569	0.315	7.28006e-13	1.25667e-09	7.59368e-17
Pgk1	2.46335e-10	-0.546904	0.789	0.935	4.72324e-06	4.97352e-17	-0.373937	0.787	0.917	9.53623e-13	2.46335e-10	9.94704e-17
Tmem37	5.14278e-17	0.540603	0.491	0.129	9.86076e-13	2.87445e-15	0.320884	0.397	0.179	5.51147e-11	2.87445e-15	1.02856e-16
Tead2	2.97435e-10	-0.465957	0.316	0.718	5.70301e-06	5.15036e-17	-0.317396	0.54	0.77	9.87531e-13	2.97435e-10	1.03007e-16
Pclaf	2.30626e-06	-0.889863	0.193	0.469	0.0442203	5.46645e-17	-0.82237	0.259	0.552	1.04814e-12	2.30626e-06	1.09329e-16
Cd248	3.42818e-16	0.728662	0.825	0.479	6.57319e-12	5.63348e-17	0.477382	0.736	0.575	1.08016e-12	3.42818e-16	1.1267e-16
Tubb2b	7.26409e-06	0.388724	0.491	0.26	0.139282	5.72641e-17	0.457346	0.632	0.37	1.09798e-12	7.26409e-06	1.14528e-16
Eif5a	3.00597e-07	-0.361747	0.947	0.982	0.00576366	6.34381e-17	-0.359445	0.971	0.99	1.21636e-12	3.00597e-07	1.26876e-16
Tmsb4x	1.75812e-06	-0.572581	1	0.999	0.0337101	6.93782e-17	-0.618462	1	1	1.33026e-12	1.75812e-06	1.38756e-16
Selenop	1.13969e-12	0.580797	0.825	0.547	2.18524e-08	8.28041e-17	0.388117	0.753	0.589	1.58769e-12	1.13969e-12	1.65608e-16
Ldha	3.62639e-08	-0.425532	0.93	0.988	0.000695323	9.08634e-17	-0.384789	0.943	0.98	1.74222e-12	3.62639e-08	1.81727e-16
Hnrnpr	8.54501e-07	-0.3641	0.789	0.915	0.0163842	1.20291e-16	-0.294126	0.851	0.944	2.30645e-12	8.54501e-07	2.40581e-16
Rbpj	6.90016e-16	0.618312	0.842	0.508	1.32304e-11	1.32507e-16	0.367881	0.759	0.547	2.54069e-12	6.90016e-16	2.65014e-16
Hnrnpc	1.58534e-05	-0.298928	0.807	0.943	0.303974	1.35466e-16	-0.309312	0.897	0.952	2.59743e-12	1.58534e-05	2.70933e-16
Cdc42ep3	2.1735e-06	-0.590172	0.298	0.587	0.0416747	1.37736e-16	-0.585606	0.236	0.549	2.64094e-12	2.1735e-06	2.75471e-16
Erh	7.91854e-05	-0.290661	0.737	0.841	1	1.40383e-16	-0.320434	0.816	0.919	2.6917e-12	7.91854e-05	2.80765e-16
Eml4	2.08588e-07	-0.386582	0.439	0.735	0.00399947	1.88726e-16	-0.342262	0.489	0.763	3.61863e-12	2.08588e-07	3.77451e-16
Spc24	1.32487e-05	-0.568452	0.123	0.396	0.25403	2.22134e-16	-0.582821	0.184	0.484	4.2592e-12	1.32487e-05	4.44268e-16
Dpysl3	5.11969e-07	0.434701	0.667	0.445	0.0098165	2.49951e-16	0.468173	0.69	0.503	4.79257e-12	5.11969e-07	4.99903e-16
Myl12a	1.10424e-08	-0.420896	0.86	0.969	0.000211727	2.51483e-16	-0.305413	0.937	0.974	4.82193e-12	1.10424e-08	5.02966e-16
Anxa2	6.21816e-06	0.323967	1	0.973	0.119227	2.65846e-16	0.397257	0.994	0.978	5.09733e-12	6.21816e-06	5.31692e-16
Prdx6	1.92842e-08	-0.472426	0.526	0.804	0.000369756	3.11282e-16	-0.344301	0.667	0.858	5.96852e-12	1.92842e-08	6.22564e-16
Txnip	2.92343e-06	0.39839	0.719	0.474	0.0560538	3.29019e-16	0.407651	0.73	0.53	6.30861e-12	2.92343e-06	6.58038e-16
H2afy	4.79525e-11	-0.483479	0.649	0.909	9.19441e-07	3.77452e-16	-0.307617	0.868	0.936	7.23727e-12	4.79525e-11	7.54904e-16
Ctbp2	7.80446e-06	-0.325341	0.228	0.545	0.149643	3.90058e-16	-0.337216	0.339	0.63	7.47897e-12	7.80446e-06	7.80116e-16
Pea15a	1.50519e-06	0.2995	0.561	0.319	0.0288605	4.02777e-16	0.288117	0.615	0.395	7.72285e-12	1.50519e-06	8.05554e-16
Smarce1	4.73078e-07	-0.374415	0.561	0.835	0.0090708	4.18358e-16	-0.311476	0.73	0.871	8.02161e-12	4.73078e-07	8.36717e-16
Ogfrl1	2.55176e-06	-0.396608	0.105	0.413	0.0489275	4.38475e-16	-0.410391	0.138	0.461	8.40732e-12	2.55176e-06	8.7695e-16
Kcnj8	9.47042e-09	-0.697524	0.211	0.62	0.000181586	4.42233e-16	-0.534223	0.138	0.467	8.47937e-12	9.47042e-09	8.84465e-16
H1fx	4.28191e-05	-0.397621	0.754	0.891	0.821013	4.48088e-16	-0.47069	0.782	0.908	8.59165e-12	4.28191e-05	8.96177e-16
Plk2	1.15574e-11	0.639494	0.561	0.219	2.21601e-07	4.77294e-16	0.445469	0.431	0.208	9.15163e-12	1.15574e-11	9.54588e-16
Erp29	3.59762e-12	0.443686	0.982	0.904	6.89807e-08	5.04709e-16	0.304704	0.948	0.947	9.67729e-12	3.59762e-12	1.00942e-15
Cyth3	1.2789e-05	-0.407714	0.596	0.73	0.245216	7.00401e-16	-0.373984	0.443	0.717	1.34295e-11	1.2789e-05	1.4008e-15
Ssr2	4.56099e-09	0.394955	0.947	0.922	8.74525e-05	7.16831e-16	0.296515	0.983	0.951	1.37445e-11	4.56099e-09	1.43366e-15
Pfkl	1.61638e-10	-0.511606	0.509	0.816	3.09925e-06	7.47541e-16	-0.307281	0.506	0.798	1.43333e-11	1.61638e-10	1.49508e-15
Arglu1	1.1807e-08	-0.414293	0.737	0.906	0.000226388	8.18734e-16	-0.293782	0.77	0.918	1.56984e-11	1.1807e-08	1.63747e-15
Stc1	8.58802e-16	0.494689	0.368	0.076	1.64667e-11	3.52077e-10	0.345956	0.247	0.105	6.75072e-06	3.52077e-10	1.7176e-15
Adamts1	9.00239e-16	0.922894	0.842	0.425	1.72612e-11	7.02864e-11	0.331052	0.684	0.496	1.34767e-06	7.02864e-11	1.80048e-15
Ppp1r14a	1.13211e-05	-0.579675	0.491	0.7	0.217072	9.2469e-16	-0.505912	0.259	0.566	1.773e-11	1.13211e-05	1.84938e-15
Grb10	2.70912e-08	0.476958	0.895	0.852	0.000519446	9.87512e-16	0.400487	0.902	0.918	1.89346e-11	2.70912e-08	1.97502e-15
Tanc1	6.07186e-06	-0.358338	0.14	0.446	0.116422	1.40206e-15	-0.334403	0.155	0.471	2.68831e-11	6.07186e-06	2.80412e-15
Thra	3.3618e-10	0.434561	0.947	0.767	6.44592e-06	1.80741e-15	0.31399	0.92	0.826	3.46553e-11	3.3618e-10	3.61482e-15
Selenos	0.00012582	0.260649	0.825	0.692	1	2.01042e-15	0.346264	0.891	0.779	3.85479e-11	0.00012582	4.02085e-15
Tln1	1.5665e-06	-0.366434	0.702	0.895	0.030036	3.68207e-15	-0.347694	0.81	0.905	7.06001e-11	1.5665e-06	7.36415e-15
Lman1	7.19637e-07	0.351376	0.912	0.795	0.0137983	6.21366e-15	0.338353	0.902	0.86	1.19141e-10	7.19637e-07	1.24273e-14
Sub1	7.66052e-09	-0.378888	0.982	0.992	0.000146883	6.81854e-15	-0.263153	0.977	0.995	1.30739e-10	7.66052e-09	1.36371e-14
Eif3a	2.52974e-07	-0.374361	0.842	0.94	0.00485053	7.01469e-15	-0.307487	0.908	0.961	1.345e-10	2.52974e-07	1.40294e-14
Pla2g4a	7.6419e-05	-0.394054	0.333	0.563	1	7.29089e-15	-0.39019	0.23	0.513	1.39796e-10	7.6419e-05	1.45818e-14
Atp5c1	9.72478e-11	-0.406812	0.912	0.985	1.86463e-06	7.45823e-15	-0.262322	0.948	0.991	1.43004e-10	9.72478e-11	1.49165e-14
Ugp2	0.000268641	0.39606	0.684	0.54	1	7.92003e-15	0.344355	0.764	0.63	1.51859e-10	0.000268641	1.58401e-14
Caprin1	9.67116e-05	-0.286062	0.579	0.815	1	8.99724e-15	-0.319735	0.626	0.824	1.72513e-10	9.67116e-05	1.79945e-14
Rem1	4.37878e-08	-0.467383	0.281	0.62	0.000839588	9.36121e-15	-0.281138	0.293	0.606	1.79492e-10	4.37878e-08	1.87224e-14
Eid1	6.97411e-06	0.326093	0.947	0.941	0.133722	1.00431e-14	0.267541	0.971	0.964	1.92567e-10	6.97411e-06	2.00862e-14
Mtch1	3.50546e-07	0.325678	0.93	0.91	0.00672137	1.22617e-14	0.297995	0.977	0.954	2.35106e-10	3.50546e-07	2.45234e-14
Myh10	0.000286015	-0.351291	0.719	0.825	1	1.27237e-14	-0.42146	0.69	0.853	2.43964e-10	0.000286015	2.54474e-14
Cks2	0.000419957	-0.714698	0.263	0.452	1	1.71221e-14	-0.708621	0.264	0.543	3.28299e-10	0.000419957	3.42442e-14
Atf5	2.23382e-11	0.40215	0.649	0.294	4.28314e-07	1.77332e-14	0.296801	0.58	0.353	3.40016e-10	2.23382e-11	3.54663e-14
Vasp	3.14233e-08	-0.476277	0.316	0.666	0.00060251	1.81708e-14	-0.330302	0.437	0.69	3.48407e-10	3.14233e-08	3.63417e-14
Tril	7.81042e-05	-0.335753	0.579	0.769	1	1.97288e-14	-0.307446	0.54	0.811	3.7828e-10	7.81042e-05	3.94576e-14
Ifitm1	0.000312715	-0.301831	0.596	0.846	1	2.12709e-14	-0.331146	0.511	0.823	4.07849e-10	0.000312715	4.25419e-14
Wipi1	4.64861e-14	0.52015	0.789	0.436	8.91324e-10	2.16227e-14	0.294069	0.701	0.49	4.14593e-10	4.64861e-14	4.32454e-14
Srpx	2.03368e-09	0.356208	0.561	0.235	3.89938e-05	2.2174e-14	0.280283	0.523	0.281	4.25165e-10	2.03368e-09	4.43481e-14
Axl	9.65405e-05	0.33615	0.667	0.491	1	2.28312e-14	0.383278	0.707	0.497	4.37766e-10	9.65405e-05	4.56624e-14
Cct8	8.22067e-10	-0.435415	0.807	0.952	1.57623e-05	2.4617e-14	-0.273165	0.92	0.966	4.72006e-10	8.22067e-10	4.9234e-14
Snrpe	2.12767e-06	-0.327485	0.825	0.956	0.0407959	2.4717e-14	-0.271605	0.908	0.966	4.73923e-10	2.12767e-06	4.94339e-14
Tmem165	6.23499e-06	0.274405	0.912	0.735	0.11955	2.78676e-14	0.276353	0.902	0.822	5.34333e-10	6.23499e-06	5.57352e-14
Snx2	0.00020124	0.308178	0.702	0.546	1	3.08921e-14	0.314642	0.759	0.583	5.92325e-10	0.00020124	6.17842e-14
Basp1	1.97431e-13	-0.733614	0.596	0.933	3.78554e-09	3.21225e-14	-0.399591	0.782	0.958	6.15918e-10	1.97431e-13	6.42451e-14
Dek	0.000548901	-0.435552	0.807	0.882	1	3.52063e-14	-0.478305	0.833	0.911	6.75045e-10	0.000548901	7.04126e-14
Atraid	4.12686e-14	0.429892	1	0.786	7.91284e-10	3.57302e-14	0.311376	0.885	0.77	6.8509e-10	4.12686e-14	7.14604e-14
Idh1	4.87848e-07	0.282171	0.509	0.243	0.009354	3.68259e-14	0.325176	0.552	0.342	7.061e-10	4.87848e-07	7.36518e-14
Mprip	4.40901e-05	-0.309418	0.667	0.815	0.845383	3.82177e-14	-0.314853	0.626	0.825	7.32786e-10	4.40901e-05	7.64354e-14
Hoxa10	0.000134149	-0.354132	0.579	0.776	1	3.97354e-14	-0.400538	0.494	0.752	7.61887e-10	0.000134149	7.94708e-14
Cd81	3.44612e-09	0.31803	0.982	0.99	6.60758e-05	4.21835e-14	0.262287	0.994	0.994	8.08827e-10	3.44612e-09	8.43671e-14
Cdca7	5.73463e-05	-0.31094	0.158	0.427	1	4.5159e-14	-0.318619	0.23	0.518	8.6588e-10	5.73463e-05	9.03181e-14
Psma3	1.48601e-05	-0.264967	0.93	0.961	0.284928	4.61189e-14	-0.26546	0.948	0.975	8.84285e-10	1.48601e-05	9.22379e-14
Cdca8	1.11633e-06	-0.643418	0.035	0.341	0.0214045	5.90239e-14	-0.600526	0.126	0.395	1.13172e-09	1.11633e-06	1.18048e-13
Ppic	2.36239e-11	0.430942	0.982	0.914	4.52964e-07	6.00761e-14	0.31957	0.954	0.945	1.1519e-09	2.36239e-11	1.20152e-13
Ctxn1	3.80817e-06	-0.379499	0.316	0.605	0.0730179	6.0428e-14	-0.321101	0.391	0.681	1.15865e-09	3.80817e-06	1.20856e-13
Ube2c	0.000128279	-0.994312	0.175	0.393	1	6.11642e-14	-0.990642	0.161	0.449	1.17276e-09	0.000128279	1.22328e-13
Phf5a	8.63907e-05	-0.28146	0.579	0.796	1	6.79029e-14	-0.29495	0.684	0.85	1.30197e-09	8.63907e-05	1.35806e-13
Hsd11b2	6.9235e-14	0.45272	0.368	0.084	1.32751e-09	3.75593e-13	0.278701	0.402	0.19	7.20162e-09	3.75593e-13	1.3847e-13
Tcim	9.34228e-07	-0.367416	0.14	0.488	0.0179129	6.97116e-14	-0.361361	0.19	0.468	1.33665e-09	9.34228e-07	1.39423e-13
Gpc3	0.00104701	-0.303188	0.982	0.976	1	7.60837e-14	-0.404419	0.96	0.975	1.45883e-09	0.00104701	1.52167e-13
Uchl1	0.04847	0.265242	0.158	0.087	1	7.63804e-14	0.392623	0.362	0.164	1.46452e-09	0.04847	1.52761e-13
Snhg18	3.02648e-07	0.387336	0.912	0.816	0.00580297	8.74506e-14	0.271564	0.948	0.831	1.67678e-09	3.02648e-07	1.74901e-13
Ccna2	0.000481872	-0.416124	0.088	0.292	1	8.83271e-14	-0.489712	0.092	0.359	1.69358e-09	0.000481872	1.76654e-13
Igf2r	3.52194e-08	0.355951	0.702	0.418	0.000675297	9.64741e-14	0.314873	0.69	0.498	1.84979e-09	3.52194e-08	1.92948e-13
Snrpd1	1.02885e-06	-0.409274	0.86	0.918	0.0197272	9.96081e-14	-0.308768	0.879	0.945	1.90989e-09	1.02885e-06	1.99216e-13
Cbx6	1.1499e-06	0.354874	0.596	0.359	0.0220481	9.97759e-14	0.29254	0.626	0.411	1.9131e-09	1.1499e-06	1.99552e-13
Tenm4	2.83466e-06	-0.322013	0.088	0.402	0.0543518	1.01157e-13	-0.283769	0.155	0.45	1.93958e-09	2.83466e-06	2.02314e-13
Lamp2	6.63499e-09	0.471774	0.86	0.658	0.000127219	1.02331e-13	0.335702	0.845	0.684	1.9621e-09	6.63499e-09	2.04663e-13
Plxdc2	0.31047	0.300204	0.316	0.28	1	1.02461e-13	0.45499	0.511	0.296	1.96459e-09	0.31047	2.04923e-13
Hspa4	3.52307e-07	-0.396499	0.421	0.698	0.00675513	1.02772e-13	-0.297802	0.506	0.755	1.97055e-09	3.52307e-07	2.05544e-13
Smc1a	1.86341e-05	-0.352469	0.719	0.855	0.357291	1.14577e-13	-0.328752	0.759	0.879	2.19691e-09	1.86341e-05	2.29155e-13
Pde3a	2.32176e-05	-0.322606	0.211	0.512	0.445174	1.16294e-13	-0.312183	0.23	0.523	2.22982e-09	2.32176e-05	2.32588e-13
Loxl1	1.72456e-09	0.444465	0.702	0.387	3.30668e-05	1.17261e-13	0.353194	0.661	0.455	2.24836e-09	1.72456e-09	2.34522e-13
Ube2i	1.4555e-06	-0.290104	0.895	0.938	0.0279078	1.24526e-13	-0.260951	0.902	0.943	2.38767e-09	1.4555e-06	2.49053e-13
Snrpd3	6.84037e-06	-0.348147	0.719	0.846	0.131157	1.36365e-13	-0.286151	0.782	0.9	2.61466e-09	6.84037e-06	2.7273e-13
Shisa3	6.02949e-07	-0.528436	0.088	0.416	0.0115609	1.37004e-13	-0.481204	0.201	0.467	2.62692e-09	6.02949e-07	2.74009e-13
Ywhaz	0.00013814	-0.255734	0.702	0.846	1	1.45423e-13	-0.289743	0.73	0.871	2.78835e-09	0.00013814	2.90847e-13
Tagln2	0.000114698	-0.386026	0.649	0.844	1	1.6848e-13	-0.378177	0.69	0.86	3.23043e-09	0.000114698	3.3696e-13
Lox	3.11567e-10	0.56014	0.737	0.348	5.97399e-06	1.6943e-13	0.376834	0.598	0.354	3.24864e-09	3.11567e-10	3.38859e-13
Tra2b	3.06824e-06	-0.370181	0.632	0.826	0.0588304	1.84627e-13	-0.312613	0.718	0.888	3.54003e-09	3.06824e-06	3.69253e-13
Ndufaf2	5.72845e-08	-0.419345	0.368	0.669	0.00109837	1.85735e-13	-0.293103	0.414	0.688	3.56128e-09	5.72845e-08	3.7147e-13
Pcdh19	1.36146e-10	0.276765	0.316	0.078	2.61047e-06	2.18483e-13	0.257341	0.282	0.107	4.1892e-09	1.36146e-10	4.36966e-13
Cpxm1	2.20626e-13	0.637533	0.86	0.548	4.23029e-09	1.88452e-09	0.326453	0.736	0.634	3.61338e-05	1.88452e-09	4.41253e-13
Cenpw	6.79658e-07	-0.38096	0.053	0.366	0.0130318	2.25216e-13	-0.333541	0.155	0.429	4.31828e-09	6.79658e-07	4.50431e-13
Id2	0.00466929	-0.319092	0.684	0.788	1	2.37967e-13	-0.427908	0.5	0.755	4.56278e-09	0.00466929	4.75935e-13
Krtcap2	1.2453e-05	0.314118	0.93	0.902	0.238773	2.67442e-13	0.283986	0.971	0.947	5.12793e-09	1.2453e-05	5.34884e-13
Banf1	0.0013106	-0.25265	0.772	0.842	1	2.77896e-13	-0.30847	0.805	0.888	5.32837e-09	0.0013106	5.55791e-13
Cenpa	0.0010455	-0.74682	0.211	0.389	1	2.98218e-13	-0.66331	0.178	0.454	5.71803e-09	0.0010455	5.96436e-13
Mecom	7.80508e-08	-0.647995	0.175	0.531	0.00149655	3.18629e-13	-0.53804	0.23	0.488	6.10939e-09	7.80508e-08	6.37258e-13
Ncam1	2.18514e-05	-0.60582	0.421	0.673	0.418979	3.40934e-13	-0.537019	0.494	0.735	6.53707e-09	2.18514e-05	6.81868e-13
Hoxd10	0.000118652	-0.290997	0.158	0.409	1	3.42899e-13	-0.280907	0.172	0.462	6.57474e-09	0.000118652	6.85798e-13
Purb	6.49916e-08	-0.368289	0.86	0.938	0.00124615	3.52062e-13	-0.270766	0.897	0.956	6.75044e-09	6.49916e-08	7.04124e-13
Tmpo	3.61434e-05	-0.417455	0.526	0.694	0.693013	3.52653e-13	-0.397272	0.586	0.751	6.76177e-09	3.61434e-05	7.05306e-13
Boc	1.0881e-06	0.337915	0.509	0.258	0.0208633	3.7479e-13	0.253053	0.534	0.321	7.18622e-09	1.0881e-06	7.4958e-13
Mt1	3.85906e-07	0.46246	0.421	0.176	0.00739935	3.78175e-13	0.787758	0.287	0.117	7.25114e-09	3.85906e-07	7.56351e-13
Hnrnph1	2.56173e-06	-0.357757	0.579	0.814	0.0491186	3.86156e-13	-0.259444	0.736	0.859	7.40416e-09	2.56173e-06	7.72312e-13
Ptn	4.19445e-06	-0.682872	0.912	0.943	0.0804245	4.01938e-13	-0.50536	0.885	0.956	7.70676e-09	4.19445e-06	8.03877e-13
Nexn	0.000113185	-0.615569	0.228	0.459	1	4.29135e-13	-0.574212	0.218	0.482	8.22824e-09	0.000113185	8.58271e-13
Alyref	0.00199179	-0.275378	0.596	0.715	1	4.3404e-13	-0.308971	0.632	0.79	8.32228e-09	0.00199179	8.6808e-13
Rbbp4	1.80147e-07	-0.39435	0.632	0.838	0.00345415	4.81095e-13	-0.285897	0.724	0.873	9.22451e-09	1.80147e-07	9.62189e-13
Klf3	1.83051e-06	0.300904	0.667	0.409	0.0350982	4.81719e-13	0.323574	0.632	0.42	9.23647e-09	1.83051e-06	9.63437e-13
Isoc1	2.5492e-05	-0.295985	0.351	0.639	0.488783	5.30032e-13	-0.301327	0.437	0.669	1.01628e-08	2.5492e-05	1.06006e-12
Knstrn	4.82688e-05	-0.357803	0.07	0.327	0.925507	5.568e-13	-0.362862	0.103	0.375	1.06761e-08	4.82688e-05	1.1136e-12
Lims1	0.000822643	-0.29432	0.509	0.7	1	5.59259e-13	-0.346442	0.511	0.759	1.07232e-08	0.000822643	1.11852e-12
Cycs	8.80028e-08	-0.444333	0.368	0.693	0.00168737	7.83703e-13	-0.330689	0.575	0.742	1.50267e-08	8.80028e-08	1.56741e-12
Gm13305	9.49348e-09	0.479841	0.772	0.53	0.000182028	8.18339e-13	0.331593	0.443	0.231	1.56908e-08	9.49348e-09	1.63668e-12
Rcsd1	2.2542e-06	-0.378043	0.211	0.529	0.0432221	8.41308e-13	-0.283553	0.236	0.545	1.61312e-08	2.2542e-06	1.68262e-12
Olfm1	2.18599e-10	0.479074	0.649	0.31	4.19141e-06	8.48614e-13	0.365888	0.586	0.392	1.62713e-08	2.18599e-10	1.69723e-12
Serping1	1.41369e-10	0.493721	0.912	0.72	2.71061e-06	9.61314e-13	0.373039	0.828	0.712	1.84322e-08	1.41369e-10	1.92263e-12
Cacybp	0.000560271	-0.291431	0.667	0.801	1	9.68299e-13	-0.312548	0.701	0.857	1.85662e-08	0.000560271	1.9366e-12
Nostrin	8.85857e-06	-0.488803	0.018	0.287	0.169854	1.02328e-12	-0.336294	0.023	0.269	1.96204e-08	8.85857e-06	2.04656e-12
Malat1	2.60872e-11	0.470102	1	1	5.00196e-07	1.03934e-12	0.344809	1	1	1.99284e-08	2.60872e-11	2.07869e-12
Gjc1	1.09753e-06	-0.42109	0.404	0.708	0.021044	1.24179e-12	-0.317128	0.517	0.745	2.381e-08	1.09753e-06	2.48357e-12
Ctnna1	1.34675e-05	-0.320102	0.579	0.798	0.258225	1.33569e-12	-0.274086	0.678	0.838	2.56106e-08	1.34675e-05	2.67139e-12
Raly	0.000148103	-0.28579	0.789	0.882	1	1.38416e-12	-0.273894	0.799	0.927	2.65399e-08	0.000148103	2.76832e-12
Nasp	0.00224474	-0.365194	0.667	0.72	1	1.393e-12	-0.432044	0.701	0.8	2.67094e-08	0.00224474	2.78601e-12
Cct3	0.000100079	-0.297854	0.842	0.913	1	1.46228e-12	-0.282208	0.839	0.939	2.80377e-08	0.000100079	2.92456e-12
Erlec1	8.04843e-06	0.349722	0.737	0.53	0.154321	2.19618e-12	0.271296	0.741	0.581	4.21095e-08	8.04843e-06	4.39235e-12
Reln	8.38661e-05	-0.284706	0.018	0.248	1	2.4845e-12	-0.268509	0.017	0.254	4.76378e-08	8.38661e-05	4.969e-12
Fkbp1a	0.000325627	-0.253786	0.912	0.952	1	2.60494e-12	-0.253491	0.931	0.971	4.99472e-08	0.000325627	5.20988e-12
Gm13889	4.37816e-05	-0.682501	0.053	0.298	0.839468	2.63672e-12	-0.62945	0.04	0.279	5.05564e-08	4.37816e-05	5.27344e-12
Ccnb2	8.98175e-06	-0.632168	0.088	0.368	0.172216	2.65707e-12	-0.52957	0.172	0.436	5.09467e-08	8.98175e-06	5.31414e-12
Nid2	1.13624e-07	0.289479	0.614	0.317	0.00217863	2.81816e-12	0.286325	0.621	0.403	5.40353e-08	1.13624e-07	5.63631e-12
Fuca1	3.19027e-06	0.362034	0.737	0.55	0.0611702	3.26361e-12	0.269204	0.753	0.595	6.25765e-08	3.19027e-06	6.52722e-12
Cdk1	0.00509749	-0.544319	0.351	0.456	1	3.35448e-12	-0.656245	0.322	0.542	6.43189e-08	0.00509749	6.70897e-12
Srsf10	0.000270265	-0.259744	0.526	0.752	1	3.49308e-12	-0.278398	0.672	0.818	6.69763e-08	0.000270265	6.98616e-12
Mfap2	3.62002e-12	0.548382	0.965	0.895	6.94103e-08	4.74144e-09	0.324907	0.92	0.937	9.09124e-05	4.74144e-09	7.24005e-12
Metap2	9.98971e-07	-0.318975	0.877	0.903	0.0191543	4.36684e-12	-0.255389	0.828	0.947	8.37297e-08	9.98971e-07	8.73368e-12
Ddah2	5.08249e-06	0.287829	0.982	0.945	0.0974516	4.40821e-12	0.291037	0.948	0.952	8.45231e-08	5.08249e-06	8.81642e-12
Snai2	0.0267852	-0.265546	0.561	0.651	1	4.75803e-12	-0.393519	0.454	0.688	9.12304e-08	0.0267852	9.51606e-12
Kif15	7.37978e-05	-0.305414	0.018	0.244	1	4.90442e-12	-0.266883	0.04	0.283	9.40373e-08	7.37978e-05	9.80884e-12
Mmp14	3.5433e-10	0.428385	0.965	0.772	6.79393e-06	4.92046e-12	0.284852	0.931	0.852	9.43449e-08	3.5433e-10	9.84091e-12
Heg1	0.000126614	0.29212	0.404	0.215	1	5.40958e-12	0.264057	0.46	0.254	1.03723e-07	0.000126614	1.08192e-11
Ccdc34	1.63568e-05	-0.433245	0.649	0.774	0.313625	6.31294e-12	-0.393362	0.69	0.819	1.21044e-07	1.63568e-05	1.26259e-11
Jun	6.42e-12	0.789197	0.982	0.784	1.23097e-07	2.8307e-11	0.557926	0.891	0.794	5.42758e-07	2.8307e-11	1.284e-11
Foxd1	7.36244e-12	0.755486	0.719	0.366	1.41168e-07	4.15415e-11	0.678821	0.563	0.412	7.96517e-07	4.15415e-11	1.47249e-11
Snrnp40	1.13662e-06	-0.360072	0.281	0.605	0.0217935	7.46225e-12	-0.269813	0.46	0.696	1.43081e-07	1.13662e-06	1.49245e-11
Top2a	6.21594e-06	-1.02504	0.123	0.403	0.119184	8.21409e-12	-0.925659	0.241	0.467	1.57497e-07	6.21594e-06	1.64282e-11
Cd47	3.88746e-08	0.382973	0.789	0.544	0.000745381	8.84699e-12	0.297941	0.718	0.555	1.69632e-07	3.88746e-08	1.7694e-11
Mki67	0.000107065	-0.714324	0.123	0.357	1	9.09658e-12	-0.674837	0.184	0.424	1.74418e-07	0.000107065	1.81932e-11
Cd9	9.35177e-12	0.48275	0.614	0.247	1.79311e-07	5.14538e-09	0.29554	0.454	0.29	9.86575e-05	5.14538e-09	1.87035e-11
Kif23	0.00194563	-0.289513	0.053	0.217	1	1.05163e-11	-0.3535	0.04	0.271	2.01639e-07	0.00194563	2.10326e-11
Col16a1	1.05943e-11	0.533104	0.789	0.427	2.03134e-07	8.25725e-10	0.313211	0.649	0.479	1.58325e-05	8.25725e-10	2.11885e-11
Cenpf	0.000124451	-0.836319	0.088	0.316	1	1.09225e-11	-0.7545	0.132	0.378	2.09428e-07	0.000124451	2.1845e-11
Cct2	9.91419e-11	-0.47777	0.772	0.932	1.90095e-06	1.19985e-11	-0.250895	0.885	0.942	2.30059e-07	9.91419e-11	2.3997e-11
Pcsk5	6.62696e-08	0.392629	0.474	0.194	0.00127065	1.23402e-11	0.314091	0.425	0.233	2.36611e-07	6.62696e-08	2.46804e-11
Cenpe	1.42719e-06	-0.575786	0	0.301	0.0273649	1.3444e-11	-0.543931	0.115	0.354	2.57776e-07	1.42719e-06	2.68881e-11
H2afx	4.25416e-07	-0.905074	0.333	0.607	0.00815694	1.35923e-11	-0.750314	0.471	0.687	2.60619e-07	4.25416e-07	2.71846e-11
Spc25	5.30826e-06	-0.505809	0.07	0.375	0.101781	1.38756e-11	-0.481874	0.161	0.404	2.66051e-07	5.30826e-06	2.77512e-11
Tm4sf1	2.09832e-06	-0.942414	0.316	0.596	0.0402332	1.41798e-11	-0.673254	0.356	0.579	2.71884e-07	2.09832e-06	2.83596e-11
Actn4	1.80763e-05	-0.342631	0.649	0.776	0.346595	1.48764e-11	-0.316455	0.609	0.786	2.8524e-07	1.80763e-05	2.97528e-11
Ddx21	0.000594735	-0.283028	0.263	0.492	1	1.49866e-11	-0.284482	0.293	0.547	2.87353e-07	0.000594735	2.99732e-11
Enpp2	1.53185e-11	0.485126	0.386	0.109	2.93717e-07	3.31459e-10	0.325018	0.27	0.118	6.35539e-06	3.31459e-10	3.0637e-11
Myl6	0.0605659	-0.262988	1	1	1	1.67775e-11	-0.342985	0.994	1	3.21691e-07	0.0605659	3.35549e-11
Npm3	3.40905e-06	-0.334442	0.386	0.708	0.0653651	1.68277e-11	-0.266279	0.546	0.754	3.22655e-07	3.40905e-06	3.36555e-11
Clca3a1	0.00040605	-0.316885	0.053	0.259	1	2.02534e-11	-0.368871	0.052	0.284	3.88339e-07	0.00040605	4.05068e-11
Kdelr1	0.00377848	0.255814	0.86	0.848	1	2.17782e-11	0.251715	0.925	0.894	4.17575e-07	0.00377848	4.35564e-11
Dkk1	6.87709e-05	-0.649206	0.035	0.271	1	2.33724e-11	-0.617402	0.029	0.249	4.48142e-07	6.87709e-05	4.67447e-11
Rbm28	2.23291e-05	-0.351529	0.351	0.613	0.428138	2.3764e-11	-0.279087	0.46	0.693	4.55651e-07	2.23291e-05	4.7528e-11
Cox4i2	2.45656e-06	-0.602151	0.07	0.371	0.0471021	2.87935e-11	-0.435648	0.046	0.278	5.52087e-07	2.45656e-06	5.75871e-11
Trio	7.75178e-10	0.4218	0.702	0.357	1.48633e-05	3.03602e-11	0.329051	0.563	0.397	5.82127e-07	7.75178e-10	6.07204e-11
Sox12	0.000126975	-0.282461	0.281	0.491	1	3.19454e-11	-0.250113	0.351	0.58	6.12522e-07	0.000126975	6.38909e-11
Tpx2	0.000237465	-0.491287	0.088	0.306	1	3.22515e-11	-0.520964	0.109	0.341	6.1839e-07	0.000237465	6.4503e-11
Zfyve21	4.3058e-07	0.32785	0.737	0.493	0.00825593	3.41519e-11	0.278056	0.713	0.576	6.54829e-07	4.3058e-07	6.83038e-11
Vcl	0.00126743	-0.297325	0.281	0.479	1	3.60539e-11	-0.321174	0.236	0.494	6.91297e-07	0.00126743	7.21078e-11
Ppp1cc	5.01309e-07	-0.391776	0.702	0.819	0.00961209	4.04154e-11	-0.254556	0.724	0.876	7.74924e-07	5.01309e-07	8.08307e-11
Smc2	0.000216804	-0.538456	0.263	0.476	1	4.55659e-11	-0.497954	0.322	0.541	8.73681e-07	0.000216804	9.11319e-11
Tubb4b	7.27024e-05	-0.810388	0.579	0.737	1	4.91128e-11	-0.67626	0.713	0.84	9.41689e-07	7.27024e-05	9.82256e-11
Ezh2	1.43072e-05	-0.37892	0.316	0.587	0.274326	4.99523e-11	-0.313878	0.42	0.625	9.57785e-07	1.43072e-05	9.99045e-11
Hist1h2ae	0.000148948	-0.905094	0.123	0.348	1	5.15827e-11	-0.953934	0.195	0.433	9.89046e-07	0.000148948	1.03165e-10
Racgap1	0.000582654	-0.325111	0.088	0.289	1	5.38304e-11	-0.34835	0.115	0.351	1.03214e-06	0.000582654	1.07661e-10
Sae1	1.31248e-05	-0.326069	0.596	0.753	0.251655	5.52624e-11	-0.255501	0.678	0.811	1.0596e-06	1.31248e-05	1.10525e-10
Kif22	0.000182557	-0.316389	0.035	0.251	1	5.87954e-11	-0.333058	0.075	0.304	1.12734e-06	0.000182557	1.17591e-10
Metrnl	6.42488e-11	0.301048	0.474	0.161	1.23191e-06	9.38803e-11	0.28531	0.385	0.205	1.80006e-06	9.38803e-11	1.28498e-10
Tacc3	6.1335e-06	-0.409075	0.018	0.294	0.117604	6.49062e-11	-0.368266	0.115	0.346	1.24451e-06	6.1335e-06	1.29812e-10
Ednra	2.00675e-05	-0.325251	0.123	0.416	0.384774	7.34972e-11	-0.253136	0.144	0.399	1.40923e-06	2.00675e-05	1.46994e-10
Hist1h2ap	9.57813e-06	-1.56395	0.158	0.433	0.183651	7.39773e-11	-1.41029	0.454	0.645	1.41844e-06	9.57813e-06	1.47955e-10
Ier5l	0.000818414	-0.280354	0.491	0.668	1	7.7056e-11	-0.276289	0.477	0.69	1.47747e-06	0.000818414	1.54112e-10
Mfap4	5.70306e-07	0.847391	0.842	0.717	0.010935	7.93926e-11	0.678412	0.822	0.771	1.52227e-06	5.70306e-07	1.58785e-10
Olfml3	4.1662e-10	0.541672	0.93	0.69	7.98828e-06	8.14252e-11	0.385728	0.833	0.717	1.56125e-06	4.1662e-10	1.6285e-10
Smc4	3.29382e-07	-0.767526	0.333	0.607	0.00631558	9.03865e-11	-0.524782	0.483	0.651	1.73307e-06	3.29382e-07	1.80773e-10
Bmyc	3.68837e-06	0.341102	0.737	0.523	0.0707209	9.34476e-11	0.500248	0.73	0.626	1.79176e-06	3.68837e-06	1.86895e-10
Crtap	4.84333e-05	0.252743	0.719	0.569	0.92866	9.41306e-11	0.255105	0.787	0.674	1.80486e-06	4.84333e-05	1.88261e-10
Tm7sf3	1.36293e-06	0.303023	0.491	0.247	0.0261329	9.57229e-11	0.253763	0.477	0.29	1.83539e-06	1.36293e-06	1.91446e-10
Syncrip	0.0014483	-0.263116	0.579	0.739	1	1.14094e-10	-0.267974	0.621	0.797	2.18763e-06	0.0014483	2.28187e-10
Skp1a	0.000257546	-0.256638	0.544	0.78	1	1.15829e-10	-0.251392	0.684	0.83	2.22091e-06	0.000257546	2.31658e-10
Birc5	2.30001e-06	-0.839331	0.105	0.399	0.0441003	1.23202e-10	-0.680614	0.264	0.474	2.36227e-06	2.30001e-06	2.46403e-10
Lrriq1	0.000111909	-0.336753	0.018	0.241	1	1.30933e-10	-0.289739	0.017	0.221	2.51051e-06	0.000111909	2.61866e-10
Nusap1	0.000514045	-0.625637	0.088	0.285	1	1.52529e-10	-0.572329	0.098	0.321	2.92459e-06	0.000514045	3.05058e-10
Ndufa4l2	1.85349e-05	-0.795657	0.439	0.645	0.355389	1.59163e-10	-0.762875	0.322	0.537	3.05178e-06	1.85349e-05	3.18325e-10
Ckap2l	0.000769072	-0.301397	0.053	0.238	1	1.72568e-10	-0.324218	0.069	0.292	3.30882e-06	0.000769072	3.45136e-10
2022-09-04	0.000600357	-0.406788	0.158	0.364	1	1.75511e-10	-0.380323	0.092	0.317	3.36525e-06	0.000600357	3.51023e-10
Knl1	0.000570625	-0.284873	0.035	0.228	1	1.76517e-10	-0.262552	0.057	0.275	3.38453e-06	0.000570625	3.53033e-10
Efnb1	1.80177e-10	0.405513	0.772	0.434	3.45471e-06	8.18719e-09	0.264329	0.667	0.536	0.000156981	8.18719e-09	3.60353e-10
Rhoj	0.000508152	0.327766	0.579	0.444	1	2.05397e-10	0.32348	0.678	0.529	3.93828e-06	0.000508152	4.10793e-10
Dkc1	0.00125362	-0.259607	0.386	0.544	1	2.18737e-10	-0.253581	0.379	0.616	4.19405e-06	0.00125362	4.37473e-10
Ly6h	3.78255e-07	0.507085	0.544	0.269	0.00725266	2.39159e-10	0.417784	0.5	0.315	4.58564e-06	3.78255e-07	4.78318e-10
Uqcrq	0.000576168	-0.255916	0.737	0.879	1	2.42436e-10	-0.250291	0.782	0.906	4.64848e-06	0.000576168	4.84873e-10
Abracl	8.88764e-08	-0.461608	0.789	0.878	0.00170412	2.51552e-10	-0.298447	0.776	0.881	4.82326e-06	8.88764e-08	5.03104e-10
Airn	7.46184e-07	0.270554	0.596	0.309	0.0143073	2.60901e-10	0.280047	0.58	0.411	5.00251e-06	7.46184e-07	5.21802e-10
Hist1h1e	0.001073	-0.592526	0.421	0.598	1	2.69357e-10	-0.58717	0.397	0.605	5.16465e-06	0.001073	5.38714e-10
Hist1h1b	0.00232937	-1.04614	0.193	0.37	1	2.70092e-10	-0.935272	0.19	0.417	5.17875e-06	0.00232937	5.40185e-10
Incenp	5.50754e-05	-0.367684	0.035	0.274	1	2.72504e-10	-0.353572	0.103	0.323	5.22499e-06	5.50754e-05	5.45008e-10
Kifap3	3.073e-05	0.284407	0.772	0.596	0.589217	2.81359e-10	0.267145	0.787	0.651	5.39478e-06	3.073e-05	5.62718e-10
Raph1	3.0525e-10	0.525438	0.789	0.452	5.85286e-06	2.13666e-07	0.300078	0.632	0.503	0.00409683	2.13666e-07	6.105e-10
Polr2m	2.40533e-05	-0.294564	0.825	0.926	0.461198	3.21668e-10	-0.257925	0.897	0.946	6.16767e-06	2.40533e-05	6.43336e-10
Sned1	3.61845e-10	0.342539	0.526	0.204	6.93801e-06	1.79048e-08	0.29536	0.402	0.249	0.000343307	1.79048e-08	7.2369e-10
Gpm6b	3.88514e-10	0.525312	0.789	0.472	7.44937e-06	3.66816e-09	0.454468	0.621	0.538	7.03333e-05	3.66816e-09	7.77029e-10
Cenpm	8.56996e-05	-0.304326	0.105	0.357	1	4.15247e-10	-0.265203	0.172	0.409	7.96195e-06	8.56996e-05	8.30495e-10
Ddx46	6.67702e-05	-0.311933	0.509	0.69	1	4.39694e-10	-0.264425	0.511	0.723	8.43069e-06	6.67702e-05	8.79388e-10
Ccnb1	0.00159765	-0.467142	0.07	0.243	1	5.06645e-10	-0.477139	0.098	0.314	9.71441e-06	0.00159765	1.01329e-09
Crip2	0.000685049	-0.423326	0.228	0.449	1	5.43223e-10	-0.470656	0.316	0.529	1.04158e-05	0.000685049	1.08645e-09
Cdca3	3.85153e-05	-0.309447	0.035	0.292	0.738492	5.46414e-10	-0.332676	0.132	0.351	1.04769e-05	3.85153e-05	1.09283e-09
Hmmr	0.000155959	-0.438481	0.018	0.227	1	7.67354e-10	-0.396857	0.069	0.279	1.47133e-05	0.000155959	1.53471e-09
Plcb1	2.41848e-06	-0.454901	0.105	0.413	0.0463719	7.98531e-10	-0.293769	0.144	0.371	1.5311e-05	2.41848e-06	1.59706e-09
Mrpl18	9.05463e-05	-0.309679	0.684	0.769	1	8.706e-10	-0.252686	0.69	0.827	1.66929e-05	9.05463e-05	1.7412e-09
Dbf4	6.90283e-05	-0.293846	0.018	0.244	1	9.33548e-10	-0.253444	0.098	0.318	1.78999e-05	6.90283e-05	1.8671e-09
Fbxo5	0.00111058	-0.315368	0.07	0.256	1	1.04858e-09	-0.301139	0.092	0.305	2.01055e-05	0.00111058	2.09717e-09
Loxl2	7.86762e-06	0.400994	0.719	0.517	0.150854	1.17675e-09	0.28958	0.684	0.545	2.2563e-05	7.86762e-06	2.3535e-09
Ybx3	3.20369e-05	0.2583	0.912	0.812	0.614275	1.29858e-09	0.266021	0.891	0.846	2.4899e-05	3.20369e-05	2.59716e-09
Nde1	4.72619e-05	-0.320105	0.105	0.364	0.906199	1.35772e-09	-0.270316	0.213	0.434	2.60329e-05	4.72619e-05	2.71543e-09
Dnmt1	0.00223842	-0.259401	0.211	0.412	1	1.59698e-09	-0.274185	0.253	0.479	3.06205e-05	0.00223842	3.19396e-09
Clmp	1.08519e-07	0.393551	0.789	0.531	0.00208075	1.88322e-09	0.274338	0.759	0.633	3.61088e-05	1.08519e-07	3.76644e-09
Tbx3	0.00172421	-0.260092	0.123	0.312	1	2.16083e-09	-0.256133	0.126	0.344	4.14318e-05	0.00172421	4.32167e-09
Wtip	5.84213e-05	-0.315985	0.579	0.762	1	2.33054e-09	-0.256556	0.603	0.78	4.46858e-05	5.84213e-05	4.66108e-09
Gng2	1.59897e-05	-0.281201	0.158	0.458	0.306586	2.48606e-09	-0.272355	0.253	0.487	4.76676e-05	1.59897e-05	4.97211e-09
Prc1	3.37661e-05	-0.58901	0.018	0.263	0.64743	3.43568e-09	-0.496371	0.109	0.308	6.58758e-05	3.37661e-05	6.87137e-09
Plat	6.50765e-06	0.337729	0.772	0.516	0.124778	4.37261e-09	0.299523	0.661	0.538	8.38404e-05	6.50765e-06	8.74522e-09
Aurkb	0.00213523	-0.325376	0.07	0.238	1	4.93665e-09	-0.312713	0.086	0.288	9.46553e-05	0.00213523	9.8733e-09
Lrp1	0.000152432	0.274002	0.86	0.635	1	5.08326e-09	0.271555	0.81	0.697	9.74664e-05	0.000152432	1.01665e-08
Hist1h4d	0.00263605	-0.379623	0.193	0.375	1	5.15861e-09	-0.380962	0.19	0.399	9.89112e-05	0.00263605	1.03172e-08
Rrm2	0.000127814	-0.31043	0.035	0.267	1	5.39217e-09	-0.316496	0.121	0.328	0.00010339	0.000127814	1.07843e-08
Il33	2.78052e-05	0.443335	0.561	0.332	0.533137	5.90749e-09	0.271608	0.575	0.382	0.00011327	2.78052e-05	1.1815e-08
Tk1	0.00137662	-0.255032	0.053	0.231	1	5.99263e-09	-0.258564	0.092	0.302	0.000114903	0.00137662	1.19853e-08
Sdc4	1.17749e-08	0.299744	0.614	0.292	0.000225772	8.26367e-09	0.391747	0.425	0.267	0.000158448	1.17749e-08	1.65273e-08
Rsu1	6.44107e-05	-0.323941	0.737	0.855	1	9.10421e-09	-0.257287	0.828	0.892	0.000174564	6.44107e-05	1.82084e-08
Lsm2	0.000677033	-0.304002	0.439	0.636	1	1.01599e-08	-0.274579	0.563	0.725	0.000194807	0.000677033	2.03199e-08
Sgo2a	0.000513314	-0.260028	0.018	0.206	1	1.44033e-08	-0.259232	0.069	0.256	0.000276168	0.000513314	2.88065e-08
Ssrp1	0.000629826	-0.280137	0.632	0.804	1	2.04593e-08	-0.253844	0.787	0.855	0.000392287	0.000629826	4.09187e-08
Ccnd2	0.00472128	-0.367861	0.895	0.898	1	2.1886e-08	-0.366795	0.874	0.916	0.000419642	0.00472128	4.3772e-08
Rassf9	0.00313417	-0.295195	0.088	0.251	1	2.19292e-08	-0.278124	0.046	0.223	0.00042047	0.00313417	4.38583e-08
Cdc20	4.03784e-05	-0.564637	0.018	0.259	0.774215	2.28689e-08	-0.538897	0.138	0.33	0.000438488	4.03784e-05	4.57377e-08
Kif20b	0.0012203	-0.279296	0.053	0.231	1	2.30885e-08	-0.280228	0.092	0.279	0.000442699	0.0012203	4.6177e-08
Kif11	0.000258138	-0.287161	0.018	0.22	1	2.42396e-08	-0.25938	0.057	0.237	0.00046477	0.000258138	4.84792e-08
Pimreg	0.0011997	-0.255425	0.035	0.207	1	3.16814e-08	-0.28257	0.075	0.255	0.000607458	0.0011997	6.33627e-08
Nrp1	7.96665e-05	0.380979	0.807	0.699	1	3.21726e-08	0.325618	0.782	0.714	0.000616877	7.96665e-05	6.43452e-08
Lpar4	1.58199e-07	0.296621	0.509	0.227	0.0030333	4.22747e-08	0.322176	0.42	0.276	0.000810575	1.58199e-07	8.45494e-08
Gng11	0.0157334	-0.320323	0.579	0.772	1	4.45507e-08	-0.336441	0.586	0.759	0.000854215	0.0157334	8.91014e-08
Ifi27	2.85151e-05	0.267306	0.649	0.391	0.546749	5.40377e-08	0.353831	0.575	0.421	0.00103612	2.85151e-05	1.08075e-07
Gstm5	2.23412e-05	0.330825	0.912	0.775	0.42837	6.2784e-08	0.260006	0.839	0.805	0.00120382	2.23412e-05	1.25568e-07
Ube2s	0.00395583	-0.472369	0.86	0.897	1	8.15713e-08	-0.395666	0.902	0.929	0.00156405	0.00395583	1.63143e-07
Crip1	7.62838e-05	0.427029	0.684	0.548	1	9.92597e-08	0.51474	0.69	0.606	0.0019032	7.62838e-05	1.98519e-07
Dnajc9	3.56278e-06	-0.468362	0.228	0.521	0.0683127	1.32779e-07	-0.294321	0.431	0.597	0.0025459	3.56278e-06	2.65557e-07
Atad2	0.0365014	-0.267688	0.281	0.389	1	1.59951e-07	-0.318805	0.27	0.453	0.0030669	0.0365014	3.19902e-07
Fosb	2.21188e-07	0.693122	0.719	0.501	0.00424106	0.00186862	0.357933	0.489	0.415	1	0.00186862	4.42376e-07
Acaa2	0.000369661	0.282401	0.895	0.807	1	4.7131e-07	0.35959	0.868	0.828	0.0090369	0.000369661	9.4262e-07
Fos	8.14985e-07	0.714424	0.877	0.796	0.0156265	0.0018138	0.380114	0.73	0.741	1	0.0018138	1.62997e-06
Dstn	8.24527e-05	-0.444044	0.947	0.974	1	8.16201e-07	-0.378234	0.954	0.974	0.0156498	8.24527e-05	1.6324e-06
Tuba1a	7.79082e-05	0.356595	0.965	0.941	1	8.29726e-07	0.287769	0.948	0.964	0.0159092	7.79082e-05	1.65945e-06
Tyms	0.000248404	-0.429246	0.228	0.452	1	8.73115e-07	-0.390853	0.408	0.557	0.0167411	0.000248404	1.74623e-06
Phlda1	8.8678e-07	0.782393	0.632	0.391	0.0170031	1.4788e-05	0.291286	0.529	0.41	0.283545	1.4788e-05	1.77356e-06
Pfn2	0.574838	-0.35732	0.456	0.474	1	1.91895e-06	-0.475244	0.391	0.552	0.0367939	0.574838	3.83789e-06
Mfge8	0.00598325	-0.409832	0.667	0.779	1	5.76243e-06	-0.374297	0.747	0.825	0.110489	0.00598325	1.15248e-05
Mcm7	0.00827979	-0.304227	0.404	0.502	1	7.82889e-06	-0.261778	0.431	0.59	0.150111	0.00827979	1.56577e-05
Cnn1	0.0254389	-0.484436	0.018	0.109	1	3.39124e-05	-0.422821	0.011	0.111	0.650237	0.0254389	6.78237e-05
Pdgfra	3.89029e-05	0.482463	0.807	0.679	0.745923	0.00358696	0.263458	0.822	0.78	1	0.00358696	7.78042e-05
Mcm3	0.00922303	-0.255027	0.263	0.411	1	5.86933e-05	-0.25187	0.391	0.516	1	0.00922303	0.000117383
Myh11	0.00375697	-0.986158	0.018	0.159	1	9.29993e-05	-0.919927	0.069	0.181	1	0.00375697	0.00018599
Mef2c	0.000943794	-0.641662	0.298	0.509	1	9.36086e-05	-0.528475	0.362	0.492	1	0.000943794	0.000187208
Mgp	0.0144337	-0.545045	0.596	0.737	1	0.000133118	-0.655747	0.655	0.741	1	0.0144337	0.000266219
Tinagl1	0.00425214	-0.46798	0.053	0.202	1	0.000319439	-0.352238	0.092	0.196	1	0.00425214	0.000638776
Nts	0.0104983	-0.852849	0	0.104	1	0.000380471	-0.667973	0.029	0.116	1	0.0104983	0.000760798
Ckb	0.015272	-0.680801	0.491	0.583	1	0.000423165	-0.415396	0.494	0.609	1	0.015272	0.000846151
Dusp1	0.00282342	0.397018	0.509	0.382	1	0.000476594	0.259455	0.431	0.336	1	0.00282342	0.000952961
Igfbp5	0.000582963	-0.71359	0.316	0.528	1	0.0870984	-0.321625	0.511	0.559	1	0.0870984	0.00116559
Prss23	0.0158315	0.29046	0.298	0.176	1	0.00104918	0.344958	0.259	0.175	1	0.0158315	0.00209726
Wnt4	0.00250182	-0.587656	0.035	0.191	1	0.0106091	-0.296511	0.126	0.197	1	0.0106091	0.00499737
Palld	0.450495	-0.435835	0.474	0.435	1	0.0255064	-0.394643	0.466	0.492	1	0.450495	0.0503622
Ptp4a3	0.103886	-0.538202	0.228	0.319	1	0.0886017	-0.318214	0.276	0.334	1	0.103886	0.169353
Arl6ip1	0.649308	-0.408823	0.649	0.624	1	0.100228	-0.293999	0.626	0.654	1	0.649308	0.19041

## Sheet: Stroma_Subcluster.7.Mut.CTRL.m
Gene	CTRL_p_val	CTRL_avg_logFC	CTRL_pct.1	CTRL_pct.2	CTRL_p_val_adj	Mutant_p_val	Mutant_avg_logFC	Mutant_pct.1	Mutant_pct.2	Mutant_p_val_adj	max_pval	minimump_p_val
Foxf1	7.57458e-211	1.09696	0.739	0.005	1.45235e-206	0	0.754146	0.717	0.008	0	7.57458e-211	0
Rbm24	3.94252e-197	1.48237	0.942	0.027	7.55939e-193	0	1.4318	0.949	0.034	0	3.94252e-197	0
Cpxm2	2.93017e-160	1.22904	0.928	0.039	5.61831e-156	0	1.17791	0.884	0.026	0	2.93017e-160	0
Tnnt2	2.23011e-219	2.95299	0.899	0.015	4.27601e-215	4.69719e-307	2.37849	0.783	0.022	9.00638e-303	2.23011e-219	9.39437e-307
Fbxl22	9.30986e-183	2.41753	0.942	0.034	1.78507e-178	5.27695e-306	2.33848	0.92	0.042	1.0118e-301	9.30986e-183	1.05539e-305
Asb2	2.85269e-222	0.85683	0.739	0.003	5.46975e-218	1.17262e-301	0.61801	0.667	0.01	2.24839e-297	2.85269e-222	2.34525e-301
Actc1	3.04786e-229	2.08651	0.855	0.009	5.84397e-225	1.00585e-300	2.09312	0.841	0.03	1.92861e-296	3.04786e-229	2.01169e-300
Sh3bgr	6.76517e-185	1.30683	0.812	0.017	1.29715e-180	6.8178e-289	1.22721	0.732	0.019	1.30725e-284	6.76517e-185	1.36356e-288
Cnn1	1.3963e-140	2.23661	0.971	0.064	2.67727e-136	1.26365e-272	2.13535	0.957	0.059	2.42293e-268	1.3963e-140	2.5273e-272
Car3	1.66045e-161	1.45539	0.797	0.023	3.18374e-157	7.84126e-269	1.76452	0.768	0.028	1.50348e-264	1.66045e-161	1.56825e-268
Actg2	1.1344e-157	3.52081	0.957	0.05	2.1751e-153	4.97172e-257	3.1886	0.957	0.069	9.53278e-253	1.1344e-157	9.94345e-257
Ckm	1.5465e-248	1.70303	0.841	0.004	2.96525e-244	6.04283e-239	1.05825	0.5	0.006	1.15865e-234	6.04283e-239	3.09299e-248
Nt5e	1.25986e-103	0.440525	0.522	0.014	2.41566e-99	1.4514e-238	0.463201	0.558	0.01	2.78292e-234	1.25986e-103	2.90281e-238
Myocd	2.97748e-142	0.767362	0.768	0.027	5.70903e-138	8.97385e-213	0.797637	0.732	0.038	1.72065e-208	2.97748e-142	1.79477e-212
Dpp6	8.97057e-140	0.675321	0.725	0.022	1.72002e-135	9.30895e-210	0.521137	0.601	0.02	1.7849e-205	8.97057e-140	1.86179e-209
Hspb6	8.60501e-115	1.08688	0.884	0.067	1.64993e-110	3.62116e-193	1.0575	0.877	0.082	6.94322e-189	8.60501e-115	7.24232e-193
Aard	1.55872e-143	0.77201	0.71	0.02	2.98869e-139	1.6233e-191	0.710237	0.674	0.035	3.11252e-187	1.55872e-143	3.2466e-191
1810041L15Rik	5.47125e-137	0.55749	0.652	0.016	1.04906e-132	1.7517e-191	0.456185	0.551	0.019	3.35872e-187	5.47125e-137	3.50341e-191
Psd	4.64857e-168	1.28252	0.928	0.038	8.91317e-164	3.72626e-187	1.25201	0.848	0.079	7.14472e-183	4.64857e-168	7.45251e-187
Lmod1	2.22533e-92	1.34383	0.942	0.108	4.26684e-88	4.93189e-185	1.34259	0.899	0.093	9.45641e-181	2.22533e-92	9.86378e-185
Myh11	2.06004e-109	3.16987	1	0.113	3.94991e-105	5.59705e-183	3.00731	0.978	0.132	1.07318e-178	2.06004e-109	1.11941e-182
Optc	1.20895e-112	0.449545	0.493	0.009	2.31804e-108	1.16553e-176	0.412302	0.457	0.011	2.23479e-172	1.20895e-112	2.33106e-176
Cav1	2.98194e-114	1.29034	0.913	0.07	5.71758e-110	5.01696e-172	1.36689	0.877	0.096	9.61952e-168	2.98194e-114	1.00339e-171
Cap2	2.20542e-84	0.578381	0.638	0.041	4.22867e-80	1.1551e-158	0.519408	0.667	0.048	2.21479e-154	2.20542e-84	2.3102e-158
Tbx18	3.59514e-88	0.820988	0.812	0.072	6.89332e-84	2.50403e-156	0.810896	0.833	0.087	4.80122e-152	3.59514e-88	5.00806e-156
Proser2	1.32238e-72	0.535324	0.638	0.051	2.53553e-68	3.44004e-154	0.555826	0.572	0.033	6.59593e-150	1.32238e-72	6.88008e-154
Casz1	7.23342e-47	0.374546	0.464	0.042	1.38694e-42	5.32647e-150	0.399447	0.543	0.029	1.0213e-145	7.23342e-47	1.06529e-149
Cbr2	8.17213e-131	0.62646	0.435	0.001	1.56692e-126	1.83096e-144	0.306143	0.268	0.001	3.51069e-140	8.17213e-131	3.66193e-144
Filip1	1.62071e-90	0.693139	0.739	0.052	3.10754e-86	1.3799e-143	0.586199	0.696	0.06	2.64581e-139	1.62071e-90	2.75979e-143
Tmod1	1.80562e-87	0.449736	0.58	0.029	3.4621e-83	1.96527e-142	0.419438	0.493	0.024	3.76822e-138	1.80562e-87	3.93055e-142
Plcb4	3.24782e-85	0.929741	0.826	0.084	6.22737e-81	7.97363e-142	0.880028	0.79	0.092	1.52886e-137	3.24782e-85	1.59473e-141
Hspb8	3.81224e-103	0.559534	0.652	0.031	7.3096e-99	1.32415e-139	0.507097	0.667	0.057	2.53892e-135	3.81224e-103	2.64829e-139
Entpd1	1.12093e-94	0.426016	0.507	0.016	2.14927e-90	4.54575e-132	0.356228	0.406	0.015	8.71603e-128	1.12093e-94	9.09151e-132
Rasd2	2.51548e-31	0.297898	0.333	0.033	4.82317e-27	5.33963e-131	0.428323	0.543	0.036	1.02382e-126	2.51548e-31	1.06793e-130
Pnck	2.78795e-85	0.658707	0.681	0.049	5.34562e-81	1.38743e-130	0.527476	0.601	0.049	2.66026e-126	2.78795e-85	2.77486e-130
Kcnma1	2.159e-94	0.43687	0.551	0.022	4.13966e-90	1.92532e-128	0.436204	0.507	0.031	3.69161e-124	2.159e-94	3.85064e-128
Cavin2	3.92314e-78	1.43686	0.942	0.146	7.52222e-74	2.14682e-128	1.21268	0.87	0.136	4.11631e-124	3.92314e-78	4.29364e-128
Pdlim3	2.35036e-59	1.65586	0.986	0.259	4.50658e-55	6.46537e-126	1.51983	0.964	0.209	1.23967e-121	2.35036e-59	1.29307e-125
Lin7a	4.62702e-91	0.298049	0.377	0.006	8.87184e-87	1.61876e-121	0.289756	0.341	0.01	3.1038e-117	4.62702e-91	3.23751e-121
Gata2	1.5435e-65	0.670984	0.609	0.053	2.95951e-61	7.01519e-121	0.647716	0.768	0.096	1.34509e-116	1.5435e-65	1.40304e-120
Sulf1	5.72525e-99	0.883699	0.739	0.047	1.09776e-94	2.14793e-118	0.75437	0.681	0.074	4.11843e-114	5.72525e-99	4.29585e-118
Acta1	6.00297e-114	1.503	0.449	0.006	1.15101e-109	5.02096e-71	0.634152	0.254	0.013	9.62718e-67	5.02096e-71	1.20059e-113
Mgll	1.61539e-49	0.842721	0.812	0.143	3.09735e-45	3.28377e-111	0.950085	0.862	0.154	6.2963e-107	1.61539e-49	6.56754e-111
Rims1	6.22334e-101	0.669148	0.58	0.022	1.19326e-96	2.09106e-108	0.353519	0.384	0.019	4.00939e-104	6.22334e-101	4.18211e-108
Ppp1r12b	3.90669e-57	0.837179	0.826	0.138	7.49068e-53	1.85629e-107	0.724048	0.804	0.137	3.55924e-103	3.90669e-57	3.71257e-107
Rgs2	3.83474e-90	1.41738	0.928	0.106	7.35273e-86	2.42331e-105	1.04075	0.775	0.125	4.64645e-101	3.83474e-90	4.84662e-105
Pcp4l1	3.60266e-87	0.904323	0.754	0.059	6.90774e-83	2.98289e-101	0.585278	0.529	0.049	5.71939e-97	3.60266e-87	5.96578e-101
Sfrp2	1.47044e-44	1.10748	0.913	0.225	2.81942e-40	1.65059e-96	1.34725	0.993	0.279	3.16484e-92	1.47044e-44	3.30118e-96
Tspan2	7.73391e-64	0.589471	0.594	0.051	1.4829e-59	3.10955e-95	0.44312	0.587	0.069	5.96226e-91	7.73391e-64	6.21911e-95
Myom1	4.02293e-57	0.29055	0.42	0.024	7.71357e-53	3.86744e-95	0.271829	0.384	0.023	7.41544e-91	4.02293e-57	7.73489e-95
Myl4	5.36154e-95	0.822274	0.507	0.017	1.02802e-90	1.02869e-73	0.532117	0.399	0.039	1.97241e-69	1.02869e-73	1.07231e-94
Aqp1	2.82517e-52	0.353179	0.493	0.041	5.41698e-48	2.50361e-91	0.379904	0.5	0.047	4.80043e-87	2.82517e-52	5.00722e-91
Fam213a	8.22145e-33	0.889057	0.884	0.322	1.57638e-28	5.9372e-90	1.13986	0.971	0.348	1.1384e-85	8.22145e-33	1.18744e-89
Tspan18	2.99111e-33	0.41564	0.58	0.103	5.73515e-29	9.0745e-89	0.488434	0.725	0.12	1.73994e-84	2.99111e-33	1.8149e-88
Ramp1	5.55187e-64	0.514179	0.565	0.043	1.06452e-59	9.5846e-87	0.404746	0.413	0.033	1.83775e-82	5.55187e-64	1.91692e-86
Tagln	9.89915e-46	2.39401	1	0.483	1.89806e-41	2.65587e-82	2.21355	1	0.49	5.09237e-78	9.89915e-46	5.31175e-82
Ppp1r1a	1.38297e-46	0.431355	0.507	0.054	2.65171e-42	1.67492e-81	0.362298	0.457	0.046	3.21148e-77	1.38297e-46	3.34983e-81
Mylk	4.1508e-43	2.46354	1	0.807	7.95874e-39	2.45603e-80	2.53589	1	0.806	4.7092e-76	4.1508e-43	4.91207e-80
Mansc4	1.38655e-73	0.514165	0.638	0.049	2.65857e-69	4.83307e-80	0.34956	0.478	0.051	9.26693e-76	1.38655e-73	9.66614e-80
Npnt	6.31678e-17	0.358662	0.435	0.108	1.21118e-12	4.20043e-77	0.498883	0.543	0.075	8.05391e-73	6.31678e-17	8.40087e-77
Hhip	4.2793e-77	0.549658	0.565	0.032	8.20514e-73	9.51452e-69	0.392187	0.5	0.067	1.82431e-64	9.51452e-69	8.55861e-77
Tpm2	2.78969e-41	2.48921	1	0.941	5.34896e-37	2.22597e-76	2.10673	1	0.931	4.26807e-72	2.78969e-41	4.45193e-76
Id4	7.24966e-23	0.624966	0.841	0.277	1.39005e-18	7.4712e-76	0.838448	0.877	0.231	1.43253e-71	7.24966e-23	1.49424e-75
Trps1	1.0158e-30	0.694105	0.841	0.251	1.94769e-26	1.74137e-75	0.868774	0.92	0.275	3.3389e-71	1.0158e-30	3.48274e-75
Pgm5	6.26835e-37	0.785934	0.783	0.199	1.20189e-32	5.19536e-75	0.709603	0.783	0.188	9.96158e-71	6.26835e-37	1.03907e-74
Acta2	3.78492e-41	2.49252	1	0.818	7.25721e-37	1.19275e-74	2.4257	0.986	0.856	2.28698e-70	3.78492e-41	2.38551e-74
Dmpk	9.2191e-67	0.916536	0.884	0.146	1.76767e-62	5.40492e-74	0.712645	0.746	0.173	1.03634e-69	9.2191e-67	1.08098e-73
Cavin3	1.4486e-42	1.315	0.986	0.407	2.77755e-38	5.71598e-74	1.26349	0.986	0.518	1.09598e-69	1.4486e-42	1.1432e-73
Map1b	8.0857e-44	1.10808	0.928	0.258	1.55035e-39	6.46692e-74	1.09417	0.92	0.309	1.23997e-69	8.0857e-44	1.29338e-73
Csrp2	1.63429e-35	1.22876	1	0.825	3.13359e-31	1.8127e-73	1.48046	0.986	0.862	3.47566e-69	1.63429e-35	3.62539e-73
Dstn	1.27138e-40	1.48642	1	0.972	2.43775e-36	2.2349e-73	1.42996	1	0.972	4.2852e-69	1.27138e-40	4.4698e-73
Myl6	2.73813e-39	1.25798	1	1	5.25009e-35	6.56074e-71	1.13353	1	0.999	1.25796e-66	2.73813e-39	1.31215e-70
Gnaz	2.61352e-43	0.310555	0.435	0.04	5.01115e-39	3.3465e-69	0.293319	0.406	0.043	6.41657e-65	2.61352e-43	6.69299e-69
Ckb	3.87041e-44	2.33239	0.986	0.56	7.42113e-40	9.37217e-69	1.97756	0.949	0.583	1.79702e-64	3.87041e-44	1.87443e-68
Htra1	6.14168e-49	0.387299	0.652	0.08	1.1776e-44	9.48488e-69	0.425795	0.645	0.11	1.81863e-64	6.14168e-49	1.89698e-68
Ednrb	3.4602e-23	0.485387	0.362	0.056	6.63459e-19	9.7197e-69	0.478692	0.478	0.061	1.86366e-64	3.4602e-23	1.94394e-68
Jph2	7.30563e-39	0.453704	0.58	0.084	1.40078e-34	8.11163e-67	0.406149	0.522	0.077	1.55532e-62	7.30563e-39	1.62233e-66
Gpc3	4.16551e-32	-1.32913	0.841	0.983	7.98695e-28	1.14683e-66	-1.44111	0.819	0.982	2.19893e-62	4.16551e-32	2.29366e-66
Gem	4.66215e-51	0.625293	0.507	0.047	8.93921e-47	1.91201e-66	0.34815	0.449	0.055	3.66608e-62	4.66215e-51	3.82401e-66
Nexn	8.3966e-32	1.09083	0.942	0.427	1.60996e-27	7.92426e-66	1.1771	0.949	0.44	1.5194e-61	8.3966e-32	1.58485e-65
Myl9	1.44898e-37	1.69417	0.986	0.874	2.77828e-33	1.31001e-64	1.57397	0.993	0.89	2.51181e-60	1.44898e-37	2.62002e-64
Marcks	4.32146e-37	-1.34261	0.696	0.98	8.28597e-33	1.08225e-63	-1.10362	0.855	0.989	2.07511e-59	4.32146e-37	2.16451e-63
Eno3	1.97422e-63	0.518826	0.551	0.043	3.78538e-59	7.14358e-63	0.349498	0.5	0.074	1.36971e-58	7.14358e-63	3.94845e-63
Hspb1	7.49226e-43	1.65117	0.942	0.366	1.43657e-38	4.44128e-63	1.34336	0.899	0.416	8.51571e-59	7.49226e-43	8.88256e-63
Pcp4	5.14047e-63	2.40025	0.667	0.079	9.85634e-59	3.37623e-59	1.57446	0.413	0.058	6.47359e-55	3.37623e-59	1.02809e-62
Ppp1r12a	4.8886e-41	1.66791	1	0.737	9.37341e-37	7.24511e-63	1.27232	0.986	0.761	1.38918e-58	4.8886e-41	1.44902e-62
Hacd1	1.63534e-34	1.05858	0.986	0.571	3.1356e-30	1.5116e-61	0.933012	0.964	0.619	2.89834e-57	1.63534e-34	3.0232e-61
Tcea3	2.16239e-57	0.380387	0.449	0.029	4.14616e-53	9.63149e-60	0.310021	0.384	0.044	1.84674e-55	2.16239e-57	1.9263e-59
Tmsb10	9.39563e-35	-1.03395	0.986	1	1.80152e-30	1.22917e-59	-0.821991	1	0.999	2.35681e-55	9.39563e-35	2.45834e-59
Ncald	3.37991e-20	0.434618	0.754	0.259	6.48064e-16	3.08633e-58	0.653033	0.862	0.281	5.91774e-54	3.37991e-20	6.17267e-58
Ccdc106	1.39417e-38	0.542124	0.667	0.126	2.67319e-34	4.34092e-58	0.466029	0.674	0.159	8.32328e-54	1.39417e-38	8.68184e-58
Tpm1	2.07993e-36	1.54045	1	0.916	3.98807e-32	4.49783e-58	1.29162	1	0.934	8.62414e-54	2.07993e-36	8.99566e-58
Ebf1	2.33849e-32	-1.62277	0.043	0.865	4.48381e-28	7.77375e-58	-1.41981	0.072	0.843	1.49054e-53	2.33849e-32	1.55475e-57
Col23a1	5.42052e-21	0.642444	0.623	0.186	1.03933e-16	2.67955e-57	0.656139	0.783	0.208	5.13777e-53	5.42052e-21	5.3591e-57
Id2	1.80339e-26	1.09244	0.971	0.775	3.45781e-22	2.99194e-57	1.141	1	0.726	5.73674e-53	1.80339e-26	5.98387e-57
Eva1b	1.35797e-30	-1.04739	0.696	0.969	2.60377e-26	3.15564e-57	-0.983241	0.725	0.97	6.05062e-53	1.35797e-30	6.31128e-57
Ccdc107	3.65153e-35	1.12508	0.942	0.487	7.00145e-31	1.15709e-56	0.966698	0.942	0.526	2.2186e-52	3.65153e-35	2.31417e-56
Ada	5.93765e-44	0.512778	0.522	0.062	1.13849e-39	1.17841e-55	0.440959	0.493	0.085	2.25948e-51	5.93765e-44	2.35682e-55
2022-09-11	3.2052e-30	-1.14333	0.478	0.927	6.14564e-26	1.85832e-55	-1.0987	0.5	0.92	3.56314e-51	3.2052e-30	3.71664e-55
Sapcd1	1.20346e-22	0.341141	0.449	0.083	2.30752e-18	4.17542e-55	0.415239	0.594	0.119	8.00595e-51	1.20346e-22	8.35084e-55
Atp2b4	4.12091e-37	0.575889	0.725	0.15	7.90144e-33	5.91954e-55	0.438385	0.725	0.183	1.13501e-50	4.12091e-37	1.18391e-54
Peg3	5.43606e-25	-1.30748	0.275	0.838	1.04231e-20	8.38841e-55	-1.37389	0.406	0.9	1.60839e-50	5.43606e-25	1.67768e-54
Palld	1.41426e-23	0.681738	0.971	0.411	2.7117e-19	1.0218e-53	0.865724	0.971	0.465	1.9592e-49	1.41426e-23	2.0436e-53
Tgfb1i1	1.64102e-31	1.01508	0.971	0.703	3.1465e-27	1.89999e-53	0.846375	0.993	0.759	3.64304e-49	1.64102e-31	3.79998e-53
Sparcl1	9.34624e-34	1.23727	0.971	0.578	1.79205e-29	6.86933e-53	1.03719	0.986	0.685	1.31713e-48	9.34624e-34	1.37387e-52
Lims1	4.75496e-20	0.777752	0.942	0.681	9.11717e-16	9.7196e-53	0.858345	0.971	0.732	1.86364e-48	4.75496e-20	1.94392e-52
Osr1	3.67492e-52	0.54198	0.652	0.078	7.0463e-48	2.44304e-51	0.425479	0.609	0.132	4.68429e-47	2.44304e-51	7.34985e-52
Synpo2	2.27935e-39	0.780627	0.768	0.17	4.37042e-35	6.21168e-52	0.530037	0.659	0.165	1.19103e-47	2.27935e-39	1.24234e-51
Mest	9.61049e-25	-1.33488	0.406	0.883	1.84272e-20	1.61015e-51	-1.31943	0.739	0.943	3.08729e-47	9.61049e-25	3.22029e-51
Gfra2	4.52721e-23	0.329838	0.406	0.066	8.68046e-19	5.48407e-51	0.325996	0.428	0.068	1.05151e-46	4.52721e-23	1.09681e-50
Cacnb2	1.15134e-26	0.366961	0.42	0.066	2.20758e-22	1.09186e-50	0.361811	0.486	0.087	2.09354e-46	1.15134e-26	2.18373e-50
Carmn	3.57278e-23	0.817739	0.855	0.381	6.85045e-19	1.04539e-49	0.883349	0.87	0.401	2.00443e-45	3.57278e-23	2.09077e-49
Cox6c	1.26275e-25	0.597658	1	0.99	2.4212e-21	1.3646e-49	0.541911	0.993	0.994	2.61647e-45	1.26275e-25	2.72919e-49
Pde5a	2.57454e-24	0.639547	0.841	0.31	4.93642e-20	2.90248e-49	0.637599	0.797	0.302	5.56522e-45	2.57454e-24	5.80496e-49
Lum	2.43064e-31	0.464174	0.797	0.185	4.66051e-27	3.69134e-49	0.538505	0.928	0.305	7.07778e-45	2.43064e-31	7.38269e-49
Pcdh7	3.13322e-45	0.561458	0.681	0.103	6.00764e-41	7.68004e-49	0.486253	0.638	0.15	1.47257e-44	3.13322e-45	1.53601e-48
Sema3c	1.81197e-21	0.58985	0.739	0.228	3.47427e-17	7.8373e-49	0.581028	0.775	0.232	1.50272e-44	1.81197e-21	1.56746e-48
Khdrbs3	5.46886e-24	0.712642	0.826	0.322	1.0486e-19	9.25386e-49	0.701695	0.891	0.383	1.77434e-44	5.46886e-24	1.85077e-48
Sfrp1	1.04964e-23	-1.35399	0.217	0.772	2.01258e-19	9.78669e-49	-1.38579	0.29	0.823	1.8765e-44	1.04964e-23	1.95734e-48
Pdlim2	3.44284e-26	-1.05187	0.275	0.848	6.6013e-22	1.50747e-48	-1.01692	0.333	0.858	2.89041e-44	3.44284e-26	3.01493e-48
Itga1	9.57064e-23	0.865499	0.913	0.485	1.83507e-18	2.00001e-48	0.859814	0.92	0.469	3.83483e-44	9.57064e-23	4.00003e-48
4930523C07Rik	6.93432e-27	0.624141	0.71	0.195	1.32959e-22	2.01194e-48	0.524651	0.594	0.149	3.85769e-44	6.93432e-27	4.02388e-48
Flna	1.72027e-25	0.840758	0.986	0.903	3.29844e-21	3.87114e-48	0.754816	1	0.919	7.42252e-44	1.72027e-25	7.74228e-48
Rassf3	1.00713e-36	0.567878	0.71	0.153	1.93108e-32	3.98921e-48	0.430086	0.645	0.17	7.64892e-44	1.00713e-36	7.97843e-48
Hpgd	5.4209e-39	0.657882	0.522	0.069	1.0394e-34	2.76027e-47	0.518403	0.478	0.089	5.29254e-43	5.4209e-39	5.52054e-47
Gpx1	4.65184e-19	0.811841	0.957	0.822	8.91943e-15	8.30482e-47	0.926434	0.971	0.866	1.59237e-42	4.65184e-19	1.66096e-46
Bag2	4.66296e-35	0.846923	0.812	0.235	8.94076e-31	1.37247e-45	0.590419	0.725	0.258	2.63157e-41	4.66296e-35	2.74494e-45
Alcam	4.23269e-23	-1.29852	0.261	0.798	8.11576e-19	1.99846e-45	-1.31212	0.362	0.83	3.83184e-41	4.23269e-23	3.99691e-45
Gucy1a1	3.83879e-29	-1.41779	0.435	0.914	7.3605e-25	2.10761e-45	-1.24264	0.326	0.83	4.04113e-41	3.83879e-29	4.21522e-45
Fbxo32	5.24257e-31	0.391283	0.522	0.084	1.00521e-26	1.16513e-44	0.314835	0.42	0.072	2.23402e-40	5.24257e-31	2.33026e-44
Serpine2	1.12706e-28	-1.20789	0.116	0.823	2.16102e-24	1.36576e-44	-0.991786	0.196	0.799	2.6187e-40	1.12706e-28	2.73151e-44
Mfap2	2.59254e-23	-0.847661	0.609	0.911	4.97094e-19	1.97394e-43	-0.808699	0.681	0.95	3.78483e-39	2.59254e-23	3.94788e-43
Basp1	1.31544e-25	-1.13502	0.652	0.933	2.52223e-21	3.46101e-43	-1.07439	0.819	0.954	6.63615e-39	1.31544e-25	6.92203e-43
Gnas	1.77478e-26	-0.684617	1	0.999	3.40295e-22	6.28496e-43	-0.599351	1	1	1.20508e-38	1.77478e-26	1.25699e-42
Acaa2	4.80283e-29	0.892635	0.986	0.802	9.20894e-25	1.44425e-42	0.75432	0.964	0.823	2.7692e-38	4.80283e-29	2.88849e-42
Speg	1.06961e-14	0.356843	0.551	0.182	2.05086e-10	1.51473e-42	0.375322	0.63	0.18	2.90434e-38	1.06961e-14	3.02946e-42
Fermt2	5.47721e-18	0.634946	0.957	0.909	1.0502e-13	4.29713e-42	0.663538	0.993	0.904	8.23932e-38	5.47721e-18	8.59427e-42
Nr2f2	5.20311e-25	-0.929939	0.696	0.945	9.97644e-21	1.10247e-41	-0.850264	0.775	0.941	2.11387e-37	5.20311e-25	2.20493e-41
Ahr	9.16404e-10	0.324364	0.391	0.136	1.75711e-05	1.10288e-41	0.444253	0.522	0.124	2.11466e-37	9.16404e-10	2.20576e-41
Nrtn	1.60618e-41	0.525152	0.609	0.092	3.07969e-37	1.77312e-37	0.297234	0.5	0.119	3.39979e-33	1.77312e-37	3.21236e-41
Gnao1	1.6819e-34	0.334729	0.522	0.075	3.22487e-30	5.51949e-41	0.300496	0.493	0.109	1.05831e-36	1.6819e-34	1.1039e-40
Ccdc85b	4.17912e-18	0.499686	0.826	0.373	8.01304e-14	1.21019e-40	0.574958	0.906	0.501	2.32041e-36	4.17912e-18	2.42037e-40
Enpp2	1.59237e-40	0.651998	0.609	0.096	3.05321e-36	6.83988e-39	0.378879	0.486	0.109	1.31148e-34	6.83988e-39	3.18474e-40
Cd63	8.37984e-20	-0.580725	0.986	0.993	1.60675e-15	1.61832e-40	-0.596758	0.978	0.996	3.10296e-36	8.37984e-20	3.23664e-40
Akr1b10	1.89339e-25	0.385362	0.58	0.127	3.63038e-21	3.62181e-40	0.320333	0.565	0.141	6.94445e-36	1.89339e-25	7.24361e-40
Cenpv	3.73188e-14	0.424532	0.725	0.321	7.15551e-10	1.8493e-39	0.521222	0.819	0.36	3.54585e-35	3.73188e-14	3.6986e-39
Lgals1	5.72995e-12	0.433012	1	0.991	1.09866e-07	1.96937e-39	0.578228	1	0.995	3.77607e-35	5.72995e-12	3.93873e-39
Plpp3	1.23646e-17	0.557754	0.725	0.278	2.3708e-13	1.62642e-38	0.654735	0.833	0.339	3.11851e-34	1.23646e-17	3.25285e-38
Notum	2.1572e-15	0.255818	0.174	0.019	4.13621e-11	1.65699e-38	0.280678	0.217	0.021	3.17712e-34	2.1572e-15	3.31398e-38
Fam8a1	7.44415e-17	0.392684	0.609	0.2	1.42734e-12	2.70652e-38	0.465991	0.681	0.243	5.18947e-34	7.44415e-17	5.41303e-38
Phlda1	1.62837e-18	0.787422	0.812	0.38	3.12224e-14	6.59063e-38	0.800713	0.841	0.395	1.26369e-33	1.62837e-18	1.31813e-37
Mdk	4.79981e-18	-0.618011	0.957	0.986	9.20316e-14	8.41436e-38	-0.60698	0.978	0.992	1.61337e-33	4.79981e-18	1.68287e-37
Bambi	1.26014e-11	0.487748	0.638	0.288	2.41619e-07	9.64712e-38	0.558708	0.812	0.345	1.84974e-33	1.26014e-11	1.92942e-37
Sorbs1	4.34968e-32	0.635066	0.826	0.245	8.34008e-28	1.8502e-37	0.527024	0.725	0.287	3.54758e-33	4.34968e-32	3.70041e-37
Hoxc10	2.59667e-15	-0.623869	0.116	0.643	4.97885e-11	5.78585e-37	-0.716365	0.123	0.697	1.10938e-32	2.59667e-15	1.15717e-36
Cfh	9.99979e-26	-1.38247	0.377	0.865	1.91736e-21	1.3403e-36	-1.10144	0.341	0.806	2.56989e-32	9.99979e-26	2.6806e-36
Glrx	2.61736e-19	0.280959	0.522	0.129	5.01853e-15	1.84461e-36	0.359782	0.587	0.177	3.53686e-32	2.61736e-19	3.68923e-36
Msrb3	7.9966e-15	0.284239	0.536	0.164	1.53327e-10	2.49776e-36	0.368184	0.638	0.205	4.78921e-32	7.9966e-15	4.99552e-36
Col9a2	3.57912e-36	0.358237	0.478	0.059	6.8626e-32	3.5945e-32	0.253758	0.529	0.133	6.89209e-28	3.5945e-32	7.15823e-36
Maged2	7.29242e-22	-0.760151	0.928	0.994	1.39825e-17	6.02304e-36	-0.641887	0.978	0.994	1.15486e-31	7.29242e-22	1.20461e-35
Tbx3	1.50533e-08	0.348696	0.594	0.291	0.000288632	2.38984e-35	0.46782	0.768	0.307	4.58229e-31	1.50533e-08	4.77969e-35
Cox8a	2.79547e-22	0.478925	0.986	0.995	5.36003e-18	2.79463e-35	0.405474	0.993	0.996	5.35842e-31	2.79547e-22	5.58926e-35
Macrod2	4.79525e-19	0.282148	0.464	0.107	9.19441e-15	4.5322e-35	0.329498	0.529	0.143	8.69003e-31	4.79525e-19	9.06439e-35
Vwa1	6.63551e-35	0.399128	0.536	0.08	1.27229e-30	7.13419e-31	0.295283	0.428	0.106	1.36791e-26	7.13419e-31	1.3271e-34
Pfn1	2.29914e-22	0.564416	1	0.99	4.40836e-18	9.27277e-35	0.495253	0.993	0.995	1.77796e-30	2.29914e-22	1.85455e-34
Ndrg2	2.45356e-21	0.422257	0.812	0.262	4.70446e-17	2.81548e-34	0.379802	0.797	0.294	5.39839e-30	2.45356e-21	5.63095e-34
Nkd1	1.2635e-12	0.373736	0.899	0.507	2.42263e-08	4.4702e-34	0.571837	0.906	0.512	8.57115e-30	1.2635e-12	8.94039e-34
Ndufa4	8.93349e-23	0.571951	1	0.965	1.71291e-18	1.40682e-33	0.42767	0.993	0.983	2.69744e-29	8.93349e-23	2.81364e-33
S100a11	3.01835e-16	-0.645861	0.855	0.976	5.78739e-12	2.94018e-33	-0.693611	0.906	0.984	5.63751e-29	3.01835e-16	5.88037e-33
Pdlim7	9.74291e-21	0.688602	0.957	0.65	1.86811e-16	3.10997e-33	0.64703	0.928	0.708	5.96305e-29	9.74291e-21	6.21994e-33
Foxp1	4.37811e-24	0.775567	0.783	0.29	8.39458e-20	3.56241e-33	0.473062	0.746	0.311	6.83056e-29	4.37811e-24	7.12481e-33
Fkbp1a	3.82196e-13	0.403904	0.971	0.949	7.32822e-09	6.02944e-33	0.456308	1	0.966	1.15609e-28	3.82196e-13	1.20589e-32
Ptn	6.91794e-29	-1.90447	0.855	0.946	1.32645e-24	8.43564e-33	-1.1984	0.935	0.952	1.61745e-28	6.91794e-29	1.68713e-32
Camk2n1	3.36709e-22	-0.923389	0.319	0.82	6.45606e-18	8.43959e-33	-0.765742	0.261	0.728	1.61821e-28	3.36709e-22	1.68792e-32
Plac8	4.22145e-18	-1.162	0.145	0.683	8.09422e-14	3.20701e-32	-1.05023	0.13	0.639	6.14912e-28	4.22145e-18	6.41401e-32
Hic1	1.36278e-16	-0.673114	0.159	0.68	2.61299e-12	3.4062e-32	-0.63967	0.261	0.738	6.53105e-28	1.36278e-16	6.8124e-32
Ldb2	9.08167e-16	-0.722624	0.101	0.612	1.74132e-11	4.23142e-32	-0.697141	0.138	0.655	8.11332e-28	9.08167e-16	8.46283e-32
Tst	1.30689e-24	0.437129	0.464	0.087	2.50584e-20	8.69921e-32	0.256784	0.478	0.122	1.66799e-27	1.30689e-24	1.73984e-31
Arf5	2.71497e-18	-0.533478	0.87	0.982	5.20568e-14	1.08605e-31	-0.47769	0.964	0.988	2.08239e-27	2.71497e-18	2.1721e-31
Anxa2	4.34767e-22	-0.810103	0.87	0.979	8.33622e-18	1.13865e-31	-0.647038	0.971	0.979	2.18324e-27	4.34767e-22	2.27729e-31
Plagl1	2.27929e-10	-0.619577	0.217	0.589	4.37032e-06	1.14992e-31	-0.852067	0.174	0.679	2.20486e-27	2.27929e-10	2.29984e-31
Ethe1	7.02016e-26	0.634448	0.841	0.312	1.34605e-21	1.93925e-31	0.466988	0.775	0.381	3.71831e-27	7.02016e-26	3.8785e-31
Hmcn1	2.72915e-20	-1.05488	0.116	0.712	5.23287e-16	1.94638e-31	-0.932613	0.196	0.69	3.73199e-27	2.72915e-20	3.89276e-31
S100a10	3.52019e-20	-1.09546	0.739	0.909	6.74962e-16	3.79969e-31	-0.962214	0.841	0.935	7.28553e-27	3.52019e-20	7.59939e-31
Ehbp1l1	6.87163e-14	0.350224	0.623	0.235	1.31757e-09	7.77754e-31	0.382758	0.681	0.263	1.49127e-26	6.87163e-14	1.55551e-30
Cdh11	8.35438e-22	-0.981918	0.652	0.868	1.60187e-17	1.13432e-30	-0.771845	0.732	0.883	2.17495e-26	8.35438e-22	2.26864e-30
Gapdh	6.16479e-14	0.352973	1	0.998	1.18204e-09	1.26211e-30	0.414405	1	0.993	2.41998e-26	6.16479e-14	2.52423e-30
Cox5b	7.79723e-14	0.427396	0.986	0.94	1.49504e-09	1.52274e-30	0.39949	1	0.977	2.91971e-26	7.79723e-14	3.04548e-30
Prrx1	3.07919e-20	0.34059	0.623	0.164	5.90403e-16	1.64326e-30	0.265818	0.746	0.249	3.15079e-26	3.07919e-20	3.28652e-30
Fnbp1	1.96034e-22	0.532188	0.812	0.318	3.75876e-18	1.70664e-30	0.466673	0.754	0.352	3.27231e-26	1.96034e-22	3.41328e-30
Lhfp	3.47653e-20	-0.782855	0.565	0.897	6.6659e-16	1.82057e-30	-0.652784	0.63	0.856	3.49075e-26	3.47653e-20	3.64113e-30
Rbpms	1.16754e-21	0.784212	0.986	0.867	2.23865e-17	2.05098e-30	0.654882	0.978	0.862	3.93255e-26	1.16754e-21	4.10197e-30
Cpz	2.41632e-30	0.485544	0.493	0.08	4.63305e-26	1.60233e-23	0.31214	0.399	0.113	3.07231e-19	1.60233e-23	4.83264e-30
Col6a3	5.1249e-12	0.48011	0.913	0.608	9.82648e-08	3.79853e-30	0.546051	0.964	0.639	7.2833e-26	5.1249e-12	7.59705e-30
Myl12b	3.15256e-19	-0.673366	0.58	0.897	6.04472e-15	4.96583e-30	-0.576778	0.688	0.902	9.52148e-26	3.15256e-19	9.93166e-30
Rap1a	9.85469e-18	0.599773	0.957	0.76	1.88954e-13	8.82865e-30	0.531304	0.957	0.799	1.69281e-25	9.85469e-18	1.76573e-29
Calm1	8.26978e-28	0.739839	1	0.985	1.58565e-23	9.19301e-30	0.529227	1	0.996	1.76267e-25	8.26978e-28	1.8386e-29
Gnai1	9.07994e-11	0.436362	0.652	0.324	1.74099e-06	1.02932e-29	0.460372	0.696	0.294	1.97362e-25	9.07994e-11	2.05865e-29
Rasgrp2	2.56316e-12	-0.634851	0.391	0.731	4.9146e-08	1.04099e-29	-0.804944	0.283	0.73	1.996e-25	2.56316e-12	2.08199e-29
Ctxn1	3.7261e-25	0.828795	0.913	0.579	7.14442e-21	1.17106e-29	0.617956	0.913	0.65	2.2454e-25	3.7261e-25	2.34213e-29
Selenom	1.36998e-29	1.01824	1	0.942	2.62681e-25	1.03979e-15	0.413331	0.978	0.957	1.9937e-11	1.03979e-15	2.73997e-29
Fth1	1.19327e-23	0.78008	1	1	2.28798e-19	1.7568e-29	0.556046	1	0.999	3.36848e-25	1.19327e-23	3.5136e-29
Cdkn1c	2.21412e-10	-1.27748	0.971	0.974	4.24535e-06	2.06251e-29	-1.31833	1	0.991	3.95466e-25	2.21412e-10	4.12503e-29
Fam118a	1.84975e-11	0.268992	0.464	0.154	3.54672e-07	2.43943e-29	0.272493	0.529	0.161	4.67736e-25	1.84975e-11	4.87886e-29
Igfbp4	2.48415e-12	-0.593285	0.797	0.911	4.76312e-08	4.16442e-29	-0.623821	0.884	0.952	7.98486e-25	2.48415e-12	8.32884e-29
Des	4.63786e-29	1.20407	0.899	0.429	8.89264e-25	3.27017e-17	0.556503	0.601	0.313	6.27022e-13	3.27017e-17	9.27573e-29
Fscn1	3.74329e-08	-0.405623	0.362	0.626	0.000717738	6.70317e-29	-0.551018	0.29	0.718	1.28527e-24	3.74329e-08	1.34063e-28
Lpp	5.79327e-23	0.698029	0.928	0.578	1.1108e-18	2.38779e-28	0.608721	0.877	0.599	4.57835e-24	5.79327e-23	4.77558e-28
H19	3.38268e-13	-0.786618	0.551	0.833	6.48594e-09	2.91419e-28	-0.905324	0.725	0.899	5.58767e-24	3.38268e-13	5.82838e-28
Ecm1	5.67074e-18	-0.954197	0.232	0.752	1.08731e-13	3.95485e-28	-0.852754	0.268	0.673	7.58302e-24	5.67074e-18	7.90969e-28
Anxa5	9.78506e-20	-0.696286	0.739	0.936	1.87619e-15	4.05834e-28	-0.528193	0.862	0.963	7.78146e-24	9.78506e-20	8.11668e-28
Pdgfrb	4.51271e-15	-0.788346	0.145	0.643	8.65266e-11	6.74894e-28	-0.735421	0.152	0.644	1.29404e-23	4.51271e-15	1.34979e-27
Mif	4.13564e-08	0.298288	1	0.972	0.000792968	7.84908e-28	0.477975	0.986	0.971	1.50498e-23	4.13564e-08	1.56982e-27
Atp2b1	1.04608e-07	0.514597	0.942	0.858	0.00200574	1.31127e-27	0.635859	0.993	0.889	2.51422e-23	1.04608e-07	2.62253e-27
Rbp1	9.06344e-14	-0.734116	0.783	0.912	1.73782e-09	1.41175e-27	-0.635136	0.906	0.949	2.7069e-23	9.06344e-14	2.82351e-27
Bok	4.8875e-21	0.900225	0.942	0.509	9.37129e-17	1.58917e-27	0.599747	0.906	0.568	3.04708e-23	4.8875e-21	3.17835e-27
Cox7c	1.48854e-11	0.302513	0.986	0.986	2.85412e-07	2.15374e-27	0.343778	1	0.995	4.12958e-23	1.48854e-11	4.30748e-27
Anxa6	3.7471e-07	0.290978	0.942	0.839	0.00718469	2.46901e-27	0.431009	0.986	0.907	4.73408e-23	3.7471e-07	4.93802e-27
Lsp1	1.15611e-11	0.471687	1	0.896	2.21672e-07	2.71297e-27	0.512572	1	0.904	5.20184e-23	1.15611e-11	5.42593e-27
Ppp1cb	2.07046e-13	0.527644	0.913	0.659	3.96991e-09	6.28172e-27	0.483621	0.906	0.66	1.20446e-22	2.07046e-13	1.25634e-26
Serping1	7.1463e-15	-0.671596	0.333	0.746	1.37023e-10	7.42677e-27	-0.621242	0.355	0.738	1.42401e-22	7.1463e-15	1.48535e-26
Cox4i1	2.92644e-16	0.335378	0.986	0.997	5.61115e-12	7.94327e-27	0.290351	1	0.997	1.52304e-22	2.92644e-16	1.58865e-26
Aes	2.93624e-18	0.576671	1	0.747	5.62995e-14	1.45999e-26	0.417534	0.978	0.812	2.79939e-22	2.93624e-18	2.91998e-26
Rhoj	3.1139e-10	0.414045	0.783	0.433	5.97059e-06	1.79983e-26	0.454721	0.884	0.52	3.45099e-22	3.1139e-10	3.59965e-26
Adk	6.94917e-15	0.492077	0.855	0.452	1.33243e-10	4.49053e-26	0.46612	0.804	0.491	8.61014e-22	6.94917e-15	8.98106e-26
Foxp2	1.22224e-13	0.356115	0.507	0.162	2.34352e-09	7.6354e-26	0.305466	0.558	0.184	1.46401e-21	1.22224e-13	1.52708e-25
Traf5	6.65315e-11	0.261615	0.594	0.241	1.27568e-06	1.05396e-25	0.29584	0.601	0.23	2.02086e-21	6.65315e-11	2.10792e-25
Arhgef5	1.07923e-21	0.369637	0.58	0.143	2.06932e-17	1.22792e-25	0.335725	0.493	0.158	2.3544e-21	1.07923e-21	2.45583e-25
Oxct1	1.36512e-10	0.368661	0.986	0.834	2.61748e-06	1.72826e-25	0.44583	0.986	0.891	3.31377e-21	1.36512e-10	3.45652e-25
Atp2a2	2.19344e-25	0.860574	0.913	0.469	4.20571e-21	2.53855e-13	0.347894	0.79	0.529	4.86741e-09	2.53855e-13	4.38689e-25
Ndufb9	1.43985e-20	0.497236	0.986	0.971	2.76077e-16	2.64129e-25	0.361192	0.993	0.974	5.06441e-21	1.43985e-20	5.28258e-25
Ier3	3.48713e-21	0.475564	0.609	0.161	6.68622e-17	2.65459e-25	0.404566	0.543	0.196	5.08991e-21	3.48713e-21	5.30918e-25
Kctd12	1.55433e-05	0.269802	0.493	0.256	0.298028	2.83665e-25	0.465144	0.667	0.28	5.43898e-21	1.55433e-05	5.67329e-25
Mpp6	5.03954e-11	-0.518495	0.333	0.659	9.66281e-07	4.28225e-25	-0.601988	0.449	0.766	8.21079e-21	5.03954e-11	8.5645e-25
Tpm4	6.07439e-25	-0.874352	0.797	0.969	1.1647e-20	1.95811e-10	-0.299659	0.964	0.964	3.75448e-06	1.95811e-10	1.21488e-24
Dpysl3	1.63572e-23	0.790574	0.913	0.432	3.13632e-19	6.32582e-25	0.473976	0.855	0.497	1.21291e-20	1.63572e-23	1.26516e-24
Atp5k	1.6185e-14	0.391296	1	0.97	3.10331e-10	6.41354e-25	0.345759	1	0.989	1.22973e-20	1.6185e-14	1.28271e-24
Ccnd1	5.92271e-16	0.650606	0.884	0.544	1.13562e-11	6.61598e-25	0.555918	0.899	0.57	1.26855e-20	5.92271e-16	1.3232e-24
Lbh	5.15851e-19	-0.827964	0.333	0.791	9.89093e-15	9.39767e-25	-0.679027	0.406	0.754	1.80191e-20	5.15851e-19	1.87953e-24
Mical3	4.60303e-13	0.269297	0.507	0.168	8.82584e-09	1.06312e-24	0.290697	0.594	0.224	2.03842e-20	4.60303e-13	2.12624e-24
Nr4a2	1.10488e-24	0.493331	0.42	0.072	2.1185e-20	1.762e-16	0.275271	0.333	0.108	3.37846e-12	1.762e-16	2.20976e-24
Tril	2.87888e-21	-0.794618	0.232	0.787	5.51996e-17	1.21936e-24	-0.55457	0.543	0.807	2.338e-20	2.87888e-21	2.43872e-24
Ppp1r14a	3.29982e-19	0.802413	0.971	0.679	6.32707e-15	2.26674e-24	0.69719	0.841	0.531	4.34625e-20	3.29982e-19	4.53348e-24
Dhrs3	2.12771e-16	-0.716966	0.145	0.637	4.07967e-12	2.84491e-24	-0.574907	0.13	0.567	5.45482e-20	2.12771e-16	5.68981e-24
Plat	1.99912e-11	-0.518506	0.13	0.545	3.83312e-07	3.32428e-24	-0.487625	0.123	0.568	6.37398e-20	1.99912e-11	6.64857e-24
Hoxc8	1.74852e-08	-0.379757	0.13	0.462	0.000335262	3.76781e-24	-0.509297	0.08	0.529	7.22439e-20	1.74852e-08	7.53561e-24
Hoxc6	3.25904e-10	-0.420926	0.116	0.487	6.24889e-06	3.9308e-24	-0.44885	0.116	0.567	7.53692e-20	3.25904e-10	7.86161e-24
Sptbn1	5.40287e-19	-0.722015	0.667	0.914	1.03595e-14	4.45767e-24	-0.5401	0.761	0.911	8.54714e-20	5.40287e-19	8.91534e-24
Add3	4.07816e-11	-0.50332	0.377	0.723	7.81947e-07	6.4544e-24	-0.570365	0.428	0.758	1.23757e-19	4.07816e-11	1.29088e-23
Ace2	6.65841e-14	-0.926632	0.029	0.513	1.27668e-09	7.36838e-24	-0.904044	0.051	0.501	1.41281e-19	6.65841e-14	1.47368e-23
Hopx	2.11007e-21	0.429943	0.681	0.192	4.04585e-17	7.50159e-24	0.292123	0.529	0.177	1.43836e-19	2.11007e-21	1.50032e-23
Ctsl	1.9975e-14	-0.660651	0.826	0.919	3.83001e-10	8.37092e-24	-0.600126	0.826	0.933	1.60504e-19	1.9975e-14	1.67418e-23
Uqcr11	2.43582e-20	0.557671	0.986	0.94	4.67044e-16	8.86082e-24	0.394267	1	0.957	1.69897e-19	2.43582e-20	1.77216e-23
Tubb6	1.20353e-14	0.624779	0.841	0.447	2.30764e-10	9.32725e-24	0.592156	0.862	0.575	1.78841e-19	1.20353e-14	1.86545e-23
Rras	1.66399e-17	0.659395	0.957	0.598	3.19053e-13	9.34706e-24	0.430722	0.899	0.579	1.79221e-19	1.66399e-17	1.86941e-23
Smtn	2.11055e-19	0.739607	0.826	0.381	4.04677e-15	1.85823e-23	0.420759	0.754	0.419	3.56298e-19	2.11055e-19	3.71647e-23
Slc25a4	8.42896e-14	0.350845	1	0.996	1.61617e-09	1.93629e-23	0.262555	1	0.998	3.71263e-19	8.42896e-14	3.87257e-23
Slmap	1.94539e-19	0.47497	0.725	0.28	3.73008e-15	2.79176e-23	0.414107	0.645	0.301	5.35291e-19	1.94539e-19	5.58351e-23
Ubb	6.08773e-11	-0.281222	1	0.999	1.16726e-06	3.11065e-23	-0.294464	1	0.999	5.96435e-19	6.08773e-11	6.22129e-23
Klhl23	3.77168e-23	0.474302	0.768	0.243	7.23182e-19	2.37224e-16	0.270501	0.587	0.284	4.54853e-12	2.37224e-16	7.54336e-23
Fign	1.45219e-12	-0.509098	0.014	0.48	2.78442e-08	4.68087e-23	-0.484264	0.036	0.477	8.97509e-19	1.45219e-12	9.36173e-23
Cnn2	6.61928e-06	0.30358	0.971	0.918	0.126918	7.26248e-23	0.456789	0.993	0.913	1.39251e-18	6.61928e-06	1.4525e-22
Ets1	1.69998e-11	-0.512916	0.087	0.517	3.25954e-07	7.32368e-23	-0.492546	0.087	0.54	1.40424e-18	1.69998e-11	1.46474e-22
Csrp1	4.70189e-08	0.365162	0.971	0.788	0.000901539	1.0732e-22	0.468108	0.957	0.807	2.05776e-18	4.70189e-08	2.14641e-22
Bex4	1.17359e-22	0.358869	0.377	0.061	2.25024e-18	4.82229e-21	0.266936	0.297	0.072	9.24627e-17	4.82229e-21	2.34718e-22
Klf4	1.20677e-22	0.684149	0.667	0.202	2.31387e-18	7.41281e-13	0.253266	0.464	0.204	1.42133e-08	7.41281e-13	2.41354e-22
Ptgis	2.12271e-15	-0.643353	0.058	0.575	4.07008e-11	2.11113e-22	-0.550602	0.174	0.579	4.04788e-18	2.12271e-15	4.22226e-22
Tm4sf1	2.41981e-15	-1.21131	0.101	0.608	4.63975e-11	2.87646e-22	-1.05184	0.181	0.585	5.51533e-18	2.41981e-15	5.75293e-22
Zbtb20	9.1911e-09	0.372589	0.855	0.561	0.00017623	3.56425e-22	0.452521	0.884	0.554	6.83409e-18	9.1911e-09	7.1285e-22
Pgam1	0.000144203	0.254646	0.957	0.977	1	3.89616e-22	0.358762	1	0.98	7.4705e-18	0.000144203	7.79232e-22
Lgi2	6.68823e-22	0.543187	0.783	0.262	1.2824e-17	4.37508e-22	0.453006	0.703	0.327	8.38878e-18	6.68823e-22	8.75016e-22
Pbxip1	3.88537e-19	0.512825	0.739	0.286	7.44981e-15	4.55776e-22	0.344126	0.674	0.295	8.73904e-18	3.88537e-19	9.11551e-22
Kif5b	6.85967e-09	0.379849	0.957	0.839	0.000131527	6.07384e-22	0.423561	0.971	0.875	1.1646e-17	6.85967e-09	1.21477e-21
Polr2f	7.30751e-11	0.45742	0.957	0.806	1.40114e-06	7.14321e-22	0.352749	0.942	0.866	1.36964e-17	7.30751e-11	1.42864e-21
Ogn	1.9357e-12	-0.788738	0.058	0.515	3.71152e-08	8.28975e-22	-0.766228	0.123	0.548	1.58948e-17	1.9357e-12	1.65795e-21
Fn1	3.83976e-11	-0.707419	0.652	0.863	7.36235e-07	1.03766e-21	-0.732357	0.79	0.914	1.9896e-17	3.83976e-11	2.07531e-21
Msrb1	9.12417e-10	0.489275	0.739	0.436	1.74947e-05	1.28206e-21	0.427754	0.783	0.47	2.45823e-17	9.12417e-10	2.56413e-21
Rasl11b	1.28415e-05	0.44084	0.609	0.387	0.246224	1.42148e-21	0.514986	0.783	0.449	2.72555e-17	1.28415e-05	2.84296e-21
2022-09-07	1.65441e-21	-0.769085	0.971	0.984	3.17216e-17	2.33012e-20	-0.496886	0.986	0.987	4.46778e-16	2.33012e-20	3.30881e-21
Dst	9.35527e-09	0.267703	0.594	0.269	0.000179378	1.95841e-21	0.324839	0.667	0.294	3.75505e-17	9.35527e-09	3.91681e-21
Ifitm1	2.81494e-21	-1.04673	0.435	0.855	5.39736e-17	7.6933e-21	-0.671073	0.594	0.814	1.47511e-16	7.6933e-21	5.62987e-21
Fubp1	1.70788e-11	-0.482218	0.638	0.876	3.27468e-07	2.82449e-21	-0.449407	0.797	0.899	5.41568e-17	1.70788e-11	5.64898e-21
Serpinh1	4.50794e-15	-0.446125	1	0.992	8.64353e-11	2.96153e-21	-0.36645	1	0.995	5.67844e-17	4.50794e-15	5.92307e-21
Sh3bgrl3	7.39061e-12	-0.50632	0.696	0.844	1.41708e-07	3.91404e-21	-0.437577	0.819	0.905	7.50479e-17	7.39061e-12	7.82809e-21
Mfge8	2.63317e-11	-0.702144	0.565	0.785	5.04884e-07	4.20323e-21	-0.682185	0.688	0.827	8.05928e-17	2.63317e-11	8.40646e-21
Bmp4	0.000118252	0.425021	0.594	0.38	1	4.57663e-21	0.717378	0.739	0.403	8.77523e-17	0.000118252	9.15326e-21
Cox7a2	5.98567e-10	0.341553	0.986	0.954	1.14769e-05	5.23524e-21	0.348531	0.993	0.964	1.00381e-16	5.98567e-10	1.04705e-20
Arpc1b	1.08344e-10	-0.530803	0.87	0.904	2.07739e-06	6.81906e-21	-0.543368	0.891	0.939	1.30749e-16	1.08344e-10	1.36381e-20
Hoxc9	2.89391e-07	-0.352908	0.159	0.447	0.00554878	7.90699e-21	-0.406988	0.087	0.499	1.51609e-16	2.89391e-07	1.5814e-20
Bzw2	7.16573e-20	0.682935	0.957	0.77	1.37396e-15	8.31475e-21	0.425523	0.978	0.815	1.59427e-16	7.16573e-20	1.66295e-20
Selenof	1.04198e-11	-0.416007	0.913	0.96	1.99789e-07	1.79823e-20	-0.354811	0.935	0.978	3.44793e-16	1.04198e-11	3.59646e-20
Tgfbi	1.3121e-10	-0.632009	0.406	0.707	2.51583e-06	2.14772e-20	-0.60387	0.428	0.718	4.11804e-16	1.3121e-10	4.29544e-20
Pygl	3.37516e-13	0.387366	0.681	0.288	6.47154e-09	2.21245e-20	0.295567	0.645	0.287	4.24216e-16	3.37516e-13	4.42491e-20
Pdia6	2.31287e-20	-0.687863	0.884	0.962	4.43469e-16	1.19008e-17	-0.355628	0.986	0.987	2.28187e-13	1.19008e-17	4.62574e-20
Sub1	1.44853e-15	-0.458995	0.986	0.992	2.77741e-11	3.14783e-20	-0.349365	0.993	0.994	6.03565e-16	1.44853e-15	6.29566e-20
Meis2	3.59189e-20	-0.810176	0.841	0.958	6.88709e-16	1.72647e-18	-0.491839	0.942	0.936	3.31034e-14	1.72647e-18	7.18378e-20
Cd9	1.359e-14	0.344463	0.652	0.242	2.60575e-10	5.48838e-20	0.330228	0.638	0.283	1.05234e-15	1.359e-14	1.09768e-19
Gmpr	2.06893e-15	0.400163	0.681	0.274	3.96696e-11	5.50958e-20	0.316792	0.587	0.259	1.05641e-15	2.06893e-15	1.10192e-19
Rbpj	9.24486e-16	0.457074	0.913	0.501	1.77261e-11	7.97099e-20	0.360366	0.862	0.544	1.52836e-15	9.24486e-16	1.5942e-19
Tle1	1.50373e-10	-0.472363	0.319	0.645	2.88325e-06	8.22015e-20	-0.437058	0.341	0.671	1.57613e-15	1.50373e-10	1.64403e-19
Mmd	8.64577e-20	0.29952	0.551	0.143	1.65774e-15	8.88699e-20	0.250142	0.464	0.167	1.70399e-15	8.88699e-20	1.72915e-19
Vcl	1.2025e-14	0.490462	0.855	0.453	2.30567e-10	1.24091e-19	0.39697	0.783	0.462	2.37933e-15	1.2025e-14	2.48183e-19
Tagln2	2.0412e-19	-0.887194	0.449	0.855	3.9138e-15	3.09467e-16	-0.501687	0.696	0.858	5.93371e-12	3.09467e-16	4.08241e-19
Mecom	1.69468e-12	-0.785885	0.101	0.538	3.24938e-08	2.26651e-19	-0.672801	0.101	0.491	4.34581e-15	1.69468e-12	4.53302e-19
Lmna	2.04121e-07	0.295099	0.913	0.635	0.00391381	4.3628e-19	0.363128	0.964	0.704	8.36524e-15	2.04121e-07	8.72561e-19
Gpc6	2.29228e-09	-0.55137	0.377	0.644	4.39521e-05	5.23474e-19	-0.531916	0.268	0.605	1.00371e-14	2.29228e-09	1.04695e-18
Pcolce	3.51105e-13	-0.752943	0.42	0.741	6.73208e-09	5.32696e-19	-0.61067	0.551	0.793	1.02139e-14	3.51105e-13	1.06539e-18
Tnnt1	5.7607e-19	0.793468	0.812	0.429	1.10456e-14	2.02174e-13	0.569611	0.667	0.429	3.87649e-09	2.02174e-13	1.15214e-18
Cald1	3.29467e-12	0.430548	1	0.994	6.31719e-08	8.8499e-19	0.488651	1	0.99	1.69688e-14	3.29467e-12	1.76998e-18
Sri	1.36192e-15	-0.542126	0.696	0.874	2.61135e-11	1.01072e-18	-0.3806	0.783	0.893	1.93795e-14	1.36192e-15	2.02143e-18
Selenop	5.59206e-06	-0.321346	0.333	0.568	0.107222	1.1159e-18	-0.432258	0.254	0.617	2.13963e-14	5.59206e-06	2.23181e-18
Ndufa11	2.61533e-10	0.373096	0.957	0.884	5.01463e-06	1.19191e-18	0.349266	0.971	0.917	2.28537e-14	2.61533e-10	2.38382e-18
Wtip	1.8484e-11	-0.483751	0.522	0.767	3.54412e-07	1.3487e-18	-0.425279	0.543	0.781	2.586e-14	1.8484e-11	2.6974e-18
Strbp	1.58185e-18	0.428686	0.754	0.274	3.03304e-14	5.53165e-17	0.257638	0.659	0.324	1.06064e-12	5.53165e-17	3.1637e-18
Rai14	4.31446e-09	-0.411698	0.188	0.512	8.27254e-05	1.94705e-18	-0.407721	0.188	0.559	3.73327e-14	4.31446e-09	3.89409e-18
Pla2g4a	1.84379e-15	-0.668488	0.058	0.578	3.53529e-11	2.13402e-18	-0.490286	0.145	0.513	4.09178e-14	1.84379e-15	4.26805e-18
Il33	7.87908e-08	-0.481914	0.043	0.355	0.00151073	2.7459e-18	-0.510061	0.036	0.413	5.26498e-14	7.87908e-08	5.4918e-18
Sec62	4.05609e-16	-0.529244	0.87	0.954	7.77715e-12	2.86064e-18	-0.357351	0.92	0.974	5.485e-14	4.05609e-16	5.72129e-18
Apbb2	6.38867e-10	-0.470858	0.13	0.49	1.22496e-05	4.2181e-18	-0.420739	0.152	0.524	8.08778e-14	6.38867e-10	8.43619e-18
Mbnl1	9.04375e-10	0.349355	0.71	0.352	1.73405e-05	4.94265e-18	0.295706	0.725	0.393	9.47704e-14	9.04375e-10	9.88531e-18
2810474O19Rik	7.5883e-07	-0.369684	0.304	0.589	0.0145498	6.30379e-18	-0.4711	0.326	0.65	1.20869e-13	7.5883e-07	1.26076e-17
Gpx8	1.4039e-09	-0.430252	0.609	0.813	2.69184e-05	6.67408e-18	-0.39807	0.725	0.872	1.27969e-13	1.4039e-09	1.33482e-17
Rasl11a	4.85606e-11	-0.668677	0.232	0.598	9.31102e-07	9.7319e-18	-0.607906	0.232	0.574	1.86599e-13	4.85606e-11	1.94638e-17
Foxd1	9.08022e-09	-0.690068	0.058	0.395	0.000174104	1.53884e-17	-0.812647	0.08	0.44	2.95057e-13	9.08022e-09	3.07768e-17
Hcfc1r1	3.73063e-15	0.598762	0.913	0.557	7.15311e-11	1.72604e-17	0.40342	0.812	0.563	3.30951e-13	3.73063e-15	3.45208e-17
Olfml3	1.79328e-14	-0.811997	0.319	0.717	3.43843e-10	1.82383e-17	-0.639338	0.478	0.737	3.49701e-13	1.79328e-14	3.64766e-17
Sfxn1	1.26591e-12	-0.506701	0.42	0.739	2.42725e-08	2.19315e-17	-0.40707	0.449	0.741	4.20515e-13	1.26591e-12	4.38631e-17
Rbpms2	2.09136e-09	0.334585	0.58	0.263	4.00997e-05	2.55233e-17	0.272019	0.616	0.29	4.89383e-13	2.09136e-09	5.10466e-17
Etl4	2.11563e-06	-0.363864	0.188	0.459	0.0405652	2.57106e-17	-0.459085	0.145	0.493	4.92974e-13	2.11563e-06	5.14211e-17
Ccdc80	1.88057e-12	-0.641572	0.522	0.822	3.60581e-08	2.74779e-17	-0.491954	0.565	0.828	5.26861e-13	1.88057e-12	5.49558e-17
Snai2	1.25184e-11	-0.67436	0.319	0.663	2.40028e-07	3.17796e-17	-0.573939	0.428	0.686	6.09341e-13	1.25184e-11	6.35591e-17
Fbln5	1.06272e-13	-0.902942	0.188	0.631	2.03767e-09	4.19122e-17	-0.758032	0.384	0.68	8.03625e-13	1.06272e-13	8.38244e-17
Gucy1b1	7.96776e-12	-0.581532	0.188	0.589	1.52774e-07	4.60005e-17	-0.446228	0.188	0.543	8.82013e-13	7.96776e-12	9.20009e-17
Pmepa1	1.33279e-13	-0.836053	0.232	0.645	2.55549e-09	4.65486e-17	-0.628098	0.406	0.692	8.92523e-13	1.33279e-13	9.30973e-17
Mrpl20	5.23051e-06	0.323049	0.899	0.753	0.10029	8.12409e-17	0.406549	0.949	0.825	1.55771e-12	5.23051e-06	1.62482e-16
Fgfr1	9.18623e-05	-0.250022	0.304	0.529	1	9.31407e-17	-0.38345	0.348	0.636	1.78588e-12	9.18623e-05	1.86281e-16
Axl	4.85385e-08	-0.372801	0.188	0.513	0.000930678	1.01098e-16	-0.380619	0.174	0.528	1.93846e-12	4.85385e-08	2.02196e-16
Gstm2	2.7812e-07	-0.304085	0.203	0.508	0.00533266	1.13143e-16	-0.441054	0.232	0.558	2.1694e-12	2.7812e-07	2.26286e-16
Snrpd2	3.56713e-10	0.305522	0.986	0.98	6.83962e-06	1.19313e-16	0.268681	1	0.981	2.2877e-12	3.56713e-10	2.38626e-16
Tmod3	8.49948e-10	-0.448796	0.42	0.7	1.62969e-05	1.19848e-16	-0.36269	0.478	0.743	2.29797e-12	8.49948e-10	2.39696e-16
Plpp1	1.64197e-13	0.410629	0.783	0.386	3.14831e-09	1.88457e-16	0.367921	0.739	0.459	3.61348e-12	1.64197e-13	3.76915e-16
Rrbp1	5.06783e-10	-0.494801	0.87	0.938	9.71707e-06	2.24703e-16	-0.43166	0.906	0.97	4.30846e-12	5.06783e-10	4.49406e-16
Nectin2	1.70142e-11	-0.514484	0.246	0.632	3.26229e-07	2.26433e-16	-0.426946	0.377	0.657	4.34163e-12	1.70142e-11	4.52866e-16
Cdc42ep5	2.17194e-07	-0.370116	0.304	0.583	0.00416448	2.33097e-16	-0.414694	0.326	0.649	4.46941e-12	2.17194e-07	4.66195e-16
Btg2	2.81228e-16	0.892474	0.884	0.671	5.39226e-12	5.87927e-15	0.613514	0.855	0.626	1.12729e-10	5.87927e-15	5.62455e-16
Cox6a1	4.40461e-10	0.351269	0.971	0.906	8.4454e-06	3.35454e-16	0.300397	0.978	0.925	6.432e-12	4.40461e-10	6.70908e-16
Ppib	3.39403e-13	-0.354292	0.986	0.993	6.50771e-09	3.42173e-16	-0.259635	0.993	0.997	6.56083e-12	3.39403e-13	6.84346e-16
Gadd45g	5.21099e-13	0.508235	0.623	0.248	9.99154e-09	3.64371e-16	0.433199	0.601	0.292	6.98644e-12	5.21099e-13	7.28741e-16
Chd3	4.98266e-06	-0.281479	0.855	0.911	0.0955375	4.33722e-16	-0.396236	0.804	0.907	8.31618e-12	4.98266e-06	8.67444e-16
Dlc1	2.61772e-12	-0.609807	0.478	0.751	5.01922e-08	4.83062e-16	-0.460026	0.529	0.75	9.26223e-12	2.61772e-12	9.66124e-16
Ostc	6.90921e-12	-0.46578	0.812	0.919	1.32477e-07	6.07706e-16	-0.339436	0.957	0.955	1.16521e-11	6.90921e-12	1.21541e-15
Mrpl23	4.19799e-06	0.267545	0.855	0.719	0.0804922	6.82622e-16	0.319163	0.942	0.713	1.30886e-11	4.19799e-06	1.36524e-15
Phactr2	0.00178687	-0.270363	0.493	0.579	1	7.08454e-16	-0.405414	0.261	0.581	1.35839e-11	0.00178687	1.41691e-15
H2afy	4.24082e-10	-0.407743	0.812	0.904	8.13135e-06	7.7342e-16	-0.354581	0.913	0.933	1.48296e-11	4.24082e-10	1.54684e-15
Pik3r1	3.93498e-05	-0.354018	0.507	0.635	0.754493	7.77684e-16	-0.467265	0.464	0.702	1.49113e-11	3.93498e-05	1.55537e-15
Iqgap2	6.59935e-07	-0.318222	0.043	0.323	0.0126536	9.80779e-16	-0.343988	0.043	0.381	1.88055e-11	6.59935e-07	1.96156e-15
Tuba1a	2.82297e-12	-0.604204	0.826	0.948	5.41276e-08	1.4848e-15	-0.494181	0.913	0.965	2.84696e-11	2.82297e-12	2.9696e-15
Ptprd	8.17608e-05	-0.298461	0.391	0.606	1	1.84227e-15	-0.418059	0.399	0.669	3.53238e-11	8.17608e-05	3.68455e-15
Rgl1	1.26683e-08	-0.379688	0.13	0.471	0.000242902	1.89918e-15	-0.335302	0.167	0.496	3.64149e-11	1.26683e-08	3.79836e-15
Ptch1	9.01999e-09	0.377296	0.725	0.375	0.000172949	2.18118e-15	0.424272	0.768	0.452	4.18219e-11	9.01999e-09	4.36235e-15
Igfbp3	1.35912e-09	-0.767637	0.043	0.409	2.60597e-05	2.31945e-15	-0.785051	0.123	0.452	4.44731e-11	1.35912e-09	4.6389e-15
Raly	1.48596e-10	-0.432537	0.725	0.886	2.84918e-06	3.63469e-15	-0.345387	0.841	0.923	6.96916e-11	1.48596e-10	7.26939e-15
Limd2	2.40889e-07	-0.360734	0.391	0.624	0.00461881	5.23394e-15	-0.363784	0.522	0.72	1.00356e-10	2.40889e-07	1.04679e-14
Shisa3	1.3792e-09	-0.587065	0.058	0.42	2.64449e-05	5.33564e-15	-0.576635	0.159	0.466	1.02306e-10	1.3792e-09	1.06713e-14
Bin1	1.54233e-07	0.337881	0.768	0.477	0.00295726	7.28166e-15	0.298468	0.841	0.58	1.39619e-10	1.54233e-07	1.45633e-14
Piezo2	2.05766e-06	-0.322809	0.072	0.351	0.0394535	7.29303e-15	-0.360607	0.058	0.386	1.39837e-10	2.05766e-06	1.45861e-14
Crip2	1.9899e-05	-0.527815	0.232	0.45	0.381544	7.92122e-15	-0.604246	0.225	0.531	1.51881e-10	1.9899e-05	1.58424e-14
Arap1	1.82028e-08	-0.401919	0.174	0.507	0.00034902	9.4364e-15	-0.409553	0.326	0.611	1.80933e-10	1.82028e-08	1.88728e-14
Traf4	1.07623e-05	-0.280641	0.275	0.511	0.206357	9.56241e-15	-0.340454	0.304	0.595	1.8335e-10	1.07623e-05	1.91248e-14
Fxyd1	9.57367e-15	0.57458	0.884	0.571	1.83566e-10	5.1432e-12	0.269887	0.87	0.602	9.86156e-08	5.1432e-12	1.91473e-14
Mbnl2	6.08304e-07	-0.372662	0.681	0.763	0.0116636	1.06797e-14	-0.410872	0.551	0.786	2.04772e-10	6.08304e-07	2.13593e-14
Hsp90b1	1.14169e-14	-0.730764	0.986	0.978	2.18907e-10	5.26849e-12	-0.484856	1	0.992	1.01018e-07	5.26849e-12	2.28338e-14
Trim35	8.95818e-06	-0.321926	0.493	0.698	0.171764	1.15136e-14	-0.35898	0.652	0.812	2.20763e-10	8.95818e-06	2.30273e-14
Bicc1	1.18025e-09	-0.485466	0.435	0.677	2.263e-05	1.65772e-14	-0.42162	0.471	0.7	3.17851e-10	1.18025e-09	3.31543e-14
Dctn6	3.05791e-10	0.325144	0.783	0.429	5.86324e-06	1.80296e-14	0.287892	0.761	0.504	3.457e-10	3.05791e-10	3.60592e-14
Luzp1	3.39316e-08	-0.397116	0.493	0.675	0.000650604	1.9392e-14	-0.356704	0.551	0.748	3.71821e-10	3.39316e-08	3.87839e-14
Golga7	2.47022e-08	-0.411492	0.362	0.629	0.000473641	2.10415e-14	-0.348953	0.486	0.711	4.0345e-10	2.47022e-08	4.2083e-14
Tenm4	9.57275e-08	-0.348192	0.101	0.404	0.00183548	2.26969e-14	-0.324739	0.123	0.448	4.3519e-10	9.57275e-08	4.53938e-14
Trib2	1.7491e-06	-0.319506	0.072	0.339	0.0335372	3.01091e-14	-0.342402	0.094	0.404	5.77312e-10	1.7491e-06	6.02182e-14
Lrrc17	6.89711e-09	-0.405459	0.203	0.547	0.000132245	3.34642e-14	-0.343862	0.239	0.575	6.41643e-10	6.89711e-09	6.69285e-14
Lrp1	1.15453e-08	-0.43752	0.377	0.656	0.00022137	3.54949e-14	-0.366416	0.457	0.717	6.80578e-10	1.15453e-08	7.09897e-14
Egflam	2.84863e-08	-0.309705	0.014	0.339	0.000546197	4.56164e-14	-0.29357	0.065	0.387	8.7465e-10	2.84863e-08	9.12329e-14
Dnm3os	5.1924e-06	-0.333018	0.159	0.416	0.0995591	4.59011e-14	-0.36854	0.217	0.538	8.80108e-10	5.1924e-06	9.18022e-14
Sertad4	4.67682e-08	-0.377115	0.058	0.377	0.000896733	4.6512e-14	-0.323068	0.072	0.392	8.91822e-10	4.67682e-08	9.30241e-14
Hspa5	5.43529e-14	-0.636178	0.899	0.971	1.04216e-09	1.36133e-13	-0.394324	0.971	0.982	2.61021e-09	1.36133e-13	1.08706e-13
Rgs5	1.06746e-13	-1.00396	0.174	0.611	2.04676e-09	6.18324e-14	-0.714339	0.152	0.45	1.18557e-09	1.06746e-13	1.23665e-13
Ndufs6	1.22584e-09	0.295855	0.986	0.853	2.35042e-05	6.4743e-14	0.27147	0.949	0.88	1.24138e-09	1.22584e-09	1.29486e-13
C1qtnf2	1.35738e-06	-0.305297	0	0.261	0.0260265	7.09493e-14	-0.375704	0.058	0.369	1.36038e-09	1.35738e-06	1.41899e-13
Hes1	4.6848e-05	-0.380047	0.275	0.505	0.898264	7.81936e-14	-0.42792	0.181	0.504	1.49928e-09	4.6848e-05	1.56387e-13
Slc9a3r2	6.13075e-06	-0.29839	0.246	0.506	0.117551	9.67826e-14	-0.384678	0.362	0.619	1.85571e-09	6.13075e-06	1.93565e-13
Cfl2	4.41336e-08	0.360622	0.913	0.782	0.000846217	1.02656e-13	0.303361	0.935	0.852	1.96833e-09	4.41336e-08	2.05312e-13
Loxl2	3.92668e-09	-0.458326	0.203	0.54	7.52901e-05	1.10789e-13	-0.373664	0.29	0.568	2.12427e-09	3.92668e-09	2.21578e-13
Fos	1.11764e-13	0.690671	0.957	0.792	2.14297e-09	1.01409e-06	0.40535	0.833	0.735	0.0194441	1.01409e-06	2.23528e-13
Naa10	3.79832e-07	0.31758	0.783	0.58	0.0072829	1.20197e-13	0.299749	0.862	0.632	2.30465e-09	3.79832e-07	2.40394e-13
Fam212a	5.99407e-07	-0.350473	0.275	0.549	0.011493	2.11921e-13	-0.348634	0.319	0.603	4.06337e-09	5.99407e-07	4.23841e-13
Cdc42ep2	3.74273e-06	-0.301686	0.101	0.365	0.0717631	2.18251e-13	-0.355403	0.109	0.414	4.18475e-09	3.74273e-06	4.36502e-13
Dnaja1	1.39294e-06	-0.299031	0.971	0.966	0.0267083	2.29709e-13	-0.30138	0.964	0.984	4.40445e-09	1.39294e-06	4.59418e-13
Vegfb	4.1909e-05	0.255211	0.754	0.557	0.803563	2.33966e-13	0.312059	0.804	0.585	4.48606e-09	4.1909e-05	4.67932e-13
Myh10	1.68574e-11	-0.637505	0.652	0.83	3.23224e-07	2.4953e-13	-0.47146	0.754	0.848	4.78449e-09	1.68574e-11	4.9906e-13
Epha3	8.42052e-06	-0.294731	0.014	0.249	0.161455	2.96337e-13	-0.385042	0.022	0.315	5.68197e-09	8.42052e-06	5.92674e-13
Phip	3.2826e-07	-0.378005	0.551	0.738	0.00629405	3.1665e-13	-0.345084	0.594	0.767	6.07145e-09	3.2826e-07	6.333e-13
Id3	2.32585e-09	-0.552238	0.957	0.969	4.45959e-05	3.4356e-13	-0.525974	0.957	0.946	6.58741e-09	2.32585e-09	6.87119e-13
Rsu1	7.01875e-10	0.356738	0.986	0.844	1.34578e-05	4.46529e-13	0.30071	0.971	0.883	8.56174e-09	7.01875e-10	8.93057e-13
P4hb	7.80449e-09	-0.412462	0.681	0.813	0.000149643	5.32324e-13	-0.300885	0.833	0.888	1.02068e-08	7.80449e-09	1.06465e-12
Col5a2	0.0120156	-0.268348	0.725	0.713	1	7.1901e-13	-0.465204	0.659	0.809	1.37863e-08	0.0120156	1.43802e-12
Timp3	7.51816e-13	-0.710234	0.58	0.811	1.44153e-08	4.51041e-07	-0.405967	0.623	0.724	0.00864826	4.51041e-07	1.50363e-12
Top1	3.52389e-09	-0.371631	0.928	0.972	6.75671e-05	7.64913e-13	-0.29355	0.978	0.981	1.46664e-08	3.52389e-09	1.52983e-12
Kcnj8	5.29407e-09	-0.685392	0.304	0.619	0.000101508	7.85023e-13	-0.564438	0.167	0.461	1.5052e-08	5.29407e-09	1.57005e-12
Cdc42	2.38238e-09	-0.337705	0.957	0.983	4.56798e-05	8.78796e-13	-0.256166	0.971	0.992	1.685e-08	2.38238e-09	1.75759e-12
Hmgb1	1.27183e-12	-0.557248	0.986	0.998	2.4386e-08	6.4862e-10	-0.311915	1	0.998	1.24366e-05	6.4862e-10	2.54365e-12
Ndufb7	2.45529e-06	0.271924	0.957	0.851	0.0470777	1.38503e-12	0.253132	0.964	0.894	2.65566e-08	2.45529e-06	2.77007e-12
Ssr2	3.58588e-09	-0.360476	0.884	0.925	6.87557e-05	1.70428e-12	-0.306373	0.906	0.956	3.26778e-08	3.58588e-09	3.40856e-12
Plxnb2	3.90776e-05	-0.260971	0.261	0.484	0.749273	1.74487e-12	-0.301363	0.254	0.535	3.34561e-08	3.90776e-05	3.48973e-12
Cxcl12	3.52373e-07	-0.82486	0.217	0.466	0.0067564	1.79402e-12	-0.709355	0.29	0.548	3.43985e-08	3.52373e-07	3.58803e-12
Cdc42ep3	9.70464e-11	0.5524	0.87	0.561	1.86077e-06	1.94454e-12	0.378607	0.783	0.516	3.72846e-08	9.70464e-11	3.88908e-12
Sdc2	3.41359e-09	-0.610269	0.333	0.65	6.54522e-05	1.99391e-12	-0.480646	0.384	0.625	3.82313e-08	3.41359e-09	3.98783e-12
Myo1b	2.10124e-12	-0.57382	0.275	0.646	4.02892e-08	1.16563e-10	-0.310999	0.384	0.613	2.23498e-06	1.16563e-10	4.20249e-12
Fndc3a	9.20586e-09	-0.468151	0.348	0.617	0.000176513	2.60295e-12	-0.343612	0.355	0.611	4.9909e-08	9.20586e-09	5.2059e-12
Tmem59	2.72743e-06	-0.318782	0.855	0.902	0.0522958	2.74807e-12	-0.33346	0.891	0.923	5.26916e-08	2.72743e-06	5.49615e-12
Peak1	3.29383e-06	-0.369521	0.362	0.566	0.0631558	3.40329e-12	-0.34972	0.326	0.593	6.52546e-08	3.29383e-06	6.80657e-12
Sema6a	1.41674e-05	-0.277859	0.101	0.349	0.271647	3.64193e-12	-0.303083	0.152	0.434	6.98303e-08	1.41674e-05	7.28385e-12
Jak1	2.4533e-07	-0.366455	0.623	0.791	0.00470396	3.77074e-12	-0.314826	0.638	0.805	7.23001e-08	2.4533e-07	7.54147e-12
Foxc2	9.39715e-05	-0.297366	0.319	0.503	1	4.24075e-12	-0.350765	0.275	0.538	8.1312e-08	9.39715e-05	8.48149e-12
Nostrin	9.36043e-07	-0.484266	0.014	0.29	0.0179477	4.5913e-12	-0.353799	0	0.266	8.80335e-08	9.36043e-07	9.18259e-12
Srsf9	2.66089e-07	-0.321258	0.812	0.881	0.00510199	4.82147e-12	-0.292997	0.833	0.889	9.24469e-08	2.66089e-07	9.64294e-12
Akap13	1.3574e-08	0.359171	0.739	0.422	0.000260268	5.7454e-12	0.322955	0.703	0.483	1.10162e-07	1.3574e-08	1.14908e-11
S100a6	2.5294e-09	-0.655244	0.58	0.848	4.84986e-05	6.15342e-12	-0.588642	0.783	0.879	1.17986e-07	2.5294e-09	1.23068e-11
Isyna1	0.00148982	-0.321093	0.565	0.626	1	6.43493e-12	-0.451744	0.529	0.688	1.23383e-07	0.00148982	1.28699e-11
Clca3a1	1.19935e-06	-0.372233	0	0.263	0.0229964	6.9286e-12	-0.408327	0.014	0.283	1.32849e-07	1.19935e-06	1.38572e-11
Rheb	2.67565e-06	0.309348	0.913	0.802	0.0513029	7.11192e-12	0.279638	0.949	0.841	1.36364e-07	2.67565e-06	1.42238e-11
Afap1l2	2.96028e-06	-0.299206	0.029	0.281	0.0567603	7.25517e-12	-0.273335	0.029	0.298	1.39111e-07	2.96028e-06	1.45103e-11
Myl12a	1.02536e-11	-0.430187	0.899	0.968	1.96603e-07	8.10341e-12	-0.285533	0.971	0.972	1.55375e-07	1.02536e-11	1.62068e-11
Mrpl33	8.23112e-09	0.339901	0.928	0.783	0.000157823	1.10418e-11	0.261624	0.949	0.799	2.11715e-07	8.23112e-09	2.20836e-11
Hoxd11	1.15496e-05	-0.3927	0.638	0.751	0.221452	1.28088e-11	-0.403913	0.594	0.75	2.45596e-07	1.15496e-05	2.56176e-11
Khdrbs1	2.91374e-06	-0.31948	0.696	0.818	0.0558681	1.31432e-11	-0.310958	0.754	0.837	2.52007e-07	2.91374e-06	2.62863e-11
Spcs2	1.63523e-10	-0.396586	0.841	0.932	3.1354e-06	1.44773e-11	-0.279129	0.942	0.954	2.77588e-07	1.63523e-10	2.89546e-11
Snx18	1.10648e-06	-0.403226	0.333	0.576	0.0212157	1.7042e-11	-0.371653	0.362	0.588	3.26763e-07	1.10648e-06	3.4084e-11
Nid1	8.04189e-05	-0.30476	0.638	0.77	1	1.81643e-11	-0.402339	0.681	0.809	3.48282e-07	8.04189e-05	3.63286e-11
Lman1	5.69212e-07	-0.334827	0.652	0.807	0.0109141	1.97428e-11	-0.302051	0.725	0.87	3.78549e-07	5.69212e-07	3.94856e-11
Agtr2	7.36301e-05	-0.263625	0.014	0.211	1	2.26461e-11	-0.445126	0.08	0.352	4.34217e-07	7.36301e-05	4.52923e-11
Anxa11	0.000150733	-0.254562	0.217	0.413	1	3.69992e-11	-0.255553	0.138	0.416	7.09422e-07	0.000150733	7.39984e-11
Sptssa	5.57335e-08	-0.367031	0.681	0.779	0.00106864	3.95906e-11	-0.295716	0.754	0.826	7.5911e-07	5.57335e-08	7.91812e-11
Nab2	8.92017e-05	-0.279125	0.232	0.422	1	4.37354e-11	-0.280746	0.203	0.472	8.38582e-07	8.92017e-05	8.74708e-11
Clmp	1.59825e-08	0.391602	0.783	0.529	0.000306449	4.45569e-11	0.263209	0.87	0.629	8.54335e-07	1.59825e-08	8.91139e-11
Malat1	0.00133821	-0.292208	1	1	1	5.50879e-11	-0.426626	1	1	1.05626e-06	0.00133821	1.10176e-10
Tspan4	7.39038e-05	-0.296123	0.464	0.613	1	5.77698e-11	-0.355034	0.442	0.661	1.10768e-06	7.39038e-05	1.1554e-10
Isoc1	1.42948e-08	-0.401596	0.377	0.64	0.000274089	5.85192e-11	-0.320764	0.486	0.663	1.12205e-06	1.42948e-08	1.17038e-10
Wwc2	1.53789e-06	-0.355014	0.435	0.628	0.0294875	6.41395e-11	-0.309149	0.464	0.661	1.22981e-06	1.53789e-06	1.28279e-10
Frem1	6.4259e-10	-0.464428	0.116	0.497	1.2321e-05	6.48162e-11	-0.325282	0.203	0.481	1.24279e-06	6.4259e-10	1.29632e-10
Emilin1	6.60107e-11	-0.553627	0.855	0.889	1.26569e-06	3.40635e-09	-0.299674	0.957	0.906	6.53133e-05	3.40635e-09	1.32021e-10
Aldh1a2	1.04039e-06	-0.552652	0.217	0.51	0.0199484	6.79062e-11	-0.566549	0.275	0.544	1.30203e-06	1.04039e-06	1.35812e-10
Map4k4	2.94016e-08	-0.379367	0.565	0.76	0.000563747	6.88831e-11	-0.318993	0.645	0.799	1.32076e-06	2.94016e-08	1.37766e-10
Siva1	1.02332e-09	-0.417155	0.783	0.88	1.96212e-05	6.99018e-11	-0.298873	0.862	0.917	1.3403e-06	1.02332e-09	1.39804e-10
Cd83	5.73414e-09	-0.356238	0	0.347	0.000109946	7.09213e-11	-0.267802	0.058	0.323	1.35985e-06	5.73414e-09	1.41843e-10
Fus	6.26332e-08	-0.302627	0.928	0.964	0.00120093	7.37529e-11	-0.253585	0.971	0.969	1.41414e-06	6.26332e-08	1.47506e-10
1500009L16Rik	3.87829e-05	-0.377503	0.333	0.539	0.743624	7.43403e-11	-0.37384	0.355	0.583	1.4254e-06	3.87829e-05	1.48681e-10
Ccnd2	8.26258e-11	-0.666248	0.754	0.904	1.58427e-06	1.19971e-08	-0.3973	0.891	0.914	0.000230033	1.19971e-08	1.65252e-10
Wnt5a	1.83497e-08	-0.394011	0.043	0.372	0.000351837	9.84022e-11	-0.324043	0.116	0.381	1.88676e-06	1.83497e-08	1.96804e-10
Arpc5	1.45708e-05	-0.296259	0.667	0.779	0.27938	1.00435e-10	-0.289806	0.739	0.827	1.92574e-06	1.45708e-05	2.0087e-10
Actn4	0.000861498	-0.263362	0.71	0.774	1	1.04451e-10	-0.324391	0.674	0.78	2.00275e-06	0.000861498	2.08903e-10
Amotl2	2.8535e-07	-0.31325	0.043	0.339	0.00547129	1.09501e-10	-0.258221	0.087	0.34	2.09958e-06	2.8535e-07	2.19003e-10
F2r	1.6589e-09	-0.448015	0.13	0.504	3.18077e-05	1.15281e-10	-0.328733	0.254	0.501	2.21039e-06	1.6589e-09	2.30561e-10
App	1.61684e-06	-0.427731	0.812	0.878	0.0310014	1.18237e-10	-0.39332	0.884	0.891	2.26707e-06	1.61684e-06	2.36474e-10
Tmed10	6.72904e-07	-0.306244	0.928	0.948	0.0129023	1.39662e-10	-0.252254	0.913	0.961	2.67788e-06	6.72904e-07	2.79324e-10
Gria4	1.39358e-09	-0.38652	0.058	0.448	2.67204e-05	1.43721e-10	-0.27527	0.138	0.394	2.75571e-06	1.39358e-09	2.87442e-10
Calr	1.54508e-10	-0.467761	0.928	0.978	2.96253e-06	6.83934e-10	-0.252361	1	0.989	1.31138e-05	6.83934e-10	3.09015e-10
Fhl2	1.75542e-10	-0.592387	0.739	0.837	3.36584e-06	1.68884e-07	-0.395677	0.761	0.772	0.00323819	1.68884e-07	3.51084e-10
Penk	1.78623e-10	-1.65702	0.391	0.64	3.42492e-06	7.32263e-10	-1.16333	0.5	0.63	1.40404e-05	7.32263e-10	3.57246e-10
2022-09-04	6.49438e-06	-0.467791	0.116	0.368	0.124523	1.79466e-10	-0.398103	0.065	0.316	3.44108e-06	6.49438e-06	3.58932e-10
Ckap4	1.84245e-10	-0.477479	0.696	0.865	3.53271e-06	1.25713e-07	-0.284588	0.877	0.918	0.00241041	1.25713e-07	3.6849e-10
Gdnf	2.26402e-05	-0.252268	0.014	0.231	0.434103	1.90767e-10	-0.264486	0.022	0.26	3.65776e-06	2.26402e-05	3.81533e-10
Ube2e3	2.02977e-10	-0.429923	0.71	0.855	3.89187e-06	4.02863e-10	-0.25518	0.79	0.866	7.72449e-06	4.02863e-10	4.05953e-10
Ubn1	2.71701e-05	-0.280261	0.536	0.699	0.52096	2.1533e-10	-0.283652	0.594	0.758	4.12873e-06	2.71701e-05	4.3066e-10
Crip1	9.58739e-06	-0.736611	0.333	0.564	0.183829	2.29566e-10	-0.822283	0.413	0.622	4.4017e-06	9.58739e-06	4.59132e-10
Col5a1	9.46161e-06	-0.412435	0.377	0.585	0.181417	2.34967e-10	-0.412176	0.464	0.652	4.50526e-06	9.46161e-06	4.69934e-10
1810058I24Rik	1.08214e-05	-0.290045	0.899	0.902	0.20749	2.54293e-10	-0.272865	0.928	0.943	4.87582e-06	1.08214e-05	5.08586e-10
Top2b	4.24176e-08	-0.409089	0.565	0.767	0.000813315	2.61655e-10	-0.294813	0.703	0.812	5.01697e-06	4.24176e-08	5.23309e-10
Ssbp4	2.84005e-05	-0.294476	0.71	0.781	0.544551	2.89048e-10	-0.302031	0.783	0.812	5.5422e-06	2.84005e-05	5.78095e-10
Junb	3.47137e-10	0.66905	0.884	0.806	6.656e-06	1.91934e-06	0.47651	0.826	0.739	0.0368014	1.91934e-06	6.94274e-10
Vgll4	6.98829e-05	-0.304165	0.507	0.633	1	3.58312e-10	-0.291573	0.5	0.695	6.87027e-06	6.98829e-05	7.16624e-10
Cygb	1.44854e-08	-0.53401	0.246	0.554	0.000277743	4.35493e-10	-0.357748	0.341	0.581	8.35015e-06	1.44854e-08	8.70987e-10
Grb10	8.3947e-05	-0.273824	0.826	0.855	1	4.45649e-10	-0.311973	0.906	0.918	8.54488e-06	8.3947e-05	8.91299e-10
Npc2	2.05742e-07	-0.302222	0.928	0.911	0.00394489	4.69344e-10	-0.274576	0.87	0.939	8.9992e-06	2.05742e-07	9.38687e-10
Zeb2	4.81043e-10	-0.756649	0.884	0.857	9.22352e-06	4.51958e-08	-0.479341	0.92	0.823	0.000866584	4.51958e-08	9.62086e-10
Pdgfra	4.83365e-10	-0.594775	0.42	0.696	9.26804e-06	1.99581e-07	-0.283556	0.659	0.789	0.00382677	1.99581e-07	9.6673e-10
Lox	4.98324e-09	-0.612411	0.029	0.378	9.55486e-05	4.9544e-10	-0.493607	0.145	0.382	9.49957e-06	4.98324e-09	9.9088e-10
1810037I17Rik	0.000934823	0.260934	0.87	0.735	1	5.16609e-10	0.255949	0.899	0.769	9.90546e-06	0.000934823	1.03322e-09
Tmem50a	9.07773e-08	-0.373211	0.696	0.841	0.00174056	6.22663e-10	-0.289101	0.797	0.886	1.19389e-05	9.07773e-08	1.24533e-09
Emcn	1.5201e-06	-0.381731	0.101	0.376	0.0291463	6.24816e-10	-0.367691	0.152	0.395	1.19802e-05	1.5201e-06	1.24963e-09
Neto2	8.56664e-06	-0.367712	0.058	0.298	0.164257	6.53857e-10	-0.289877	0.065	0.305	1.2537e-05	8.56664e-06	1.30771e-09
S1pr3	5.48402e-06	-0.323093	0.232	0.48	0.105151	7.35098e-10	-0.263017	0.196	0.445	1.40948e-05	5.48402e-06	1.4702e-09
Dbn1	5.3664e-08	-0.383468	0.348	0.617	0.00102895	8.00109e-10	-0.279354	0.551	0.701	1.53413e-05	5.3664e-08	1.60022e-09
Uqcrq	9.88323e-10	0.290049	0.971	0.869	1.89501e-05	1.09423e-09	0.260215	0.964	0.895	2.09809e-05	1.09423e-09	1.97665e-09
Ddah2	1.24165e-05	-0.276617	0.87	0.95	0.238074	1.18122e-09	-0.296505	0.928	0.953	2.26487e-05	1.24165e-05	2.36244e-09
G3bp2	2.26602e-07	0.309618	0.87	0.622	0.00434486	1.18457e-09	0.258266	0.87	0.733	2.27129e-05	2.26602e-07	2.36913e-09
Ptma	2.47469e-07	-0.276917	1	1	0.00474498	1.25614e-09	-0.268941	1	1	2.40853e-05	2.47469e-07	2.51228e-09
P3h3	9.25418e-06	-0.294732	0.478	0.676	0.17744	1.34651e-09	-0.285107	0.638	0.762	2.5818e-05	9.25418e-06	2.69303e-09
Gsta4	6.48968e-09	-0.486269	0.406	0.683	0.000124433	1.39371e-09	-0.346991	0.457	0.637	2.67231e-05	6.48968e-09	2.78743e-09
Rap2a	0.0200402	-0.288447	0.435	0.497	1	1.43865e-09	-0.421026	0.384	0.566	2.75846e-05	0.0200402	2.87729e-09
Tcf4	7.89531e-06	-0.330183	0.522	0.684	0.151385	1.47873e-09	-0.326837	0.565	0.724	2.83531e-05	7.89531e-06	2.95745e-09
Ptk7	2.46088e-05	-0.276089	0.261	0.48	0.471849	1.56569e-09	-0.282188	0.348	0.568	3.00205e-05	2.46088e-05	3.13138e-09
Tpm3	1.73371e-09	-0.430256	0.609	0.814	3.32421e-05	1.0375e-07	-0.260183	0.681	0.8	0.0019893	1.0375e-07	3.46742e-09
Scarf2	2.44238e-06	-0.326335	0.275	0.507	0.0468302	1.75376e-09	-0.263077	0.341	0.559	3.36266e-05	2.44238e-06	3.50752e-09
Cyth3	9.14757e-09	-0.408094	0.478	0.737	0.000175396	1.84891e-09	-0.2862	0.529	0.708	3.54511e-05	9.14757e-09	3.69783e-09
Bzw1	1.01116e-07	-0.352329	0.826	0.901	0.0019388	1.8771e-09	-0.25669	0.848	0.923	3.59916e-05	1.01116e-07	3.7542e-09
Spred1	0.000133736	-0.268474	0.275	0.464	1	2.35561e-09	-0.251208	0.29	0.526	4.51664e-05	0.000133736	4.71121e-09
Itgb5	1.49878e-05	-0.310092	0.188	0.416	0.287377	2.50845e-09	-0.284478	0.246	0.485	4.80971e-05	1.49878e-05	5.0169e-09
Itga8	5.04177e-06	-0.443494	0.275	0.503	0.0966709	2.74136e-09	-0.345956	0.232	0.463	5.25628e-05	5.04177e-06	5.48272e-09
[truncated: 76 more rows]

## Sheet: Stroma_Subcluster.8.Mut.CTRL.m
Gene	CTRL_p_val	CTRL_avg_logFC	CTRL_pct.1	CTRL_pct.2	CTRL_p_val_adj	Mutant_p_val	Mutant_avg_logFC	Mutant_pct.1	Mutant_pct.2	Mutant_p_val_adj	max_pval	minimump_p_val
[truncated: 426 more rows]
