# Supplementary material for: Smarca4 deficiency induces Pttg1 oncogene upregulation and hyperproliferation of tubular and interstitial cells during kidney development
Source: Front Cell Dev Biol. 2023 Sep 4;11:1233317. doi: 10.3389/fcell.2023.1233317 (PMC10506413; doi:10.3389/fcell.2023.1233317)
Supplement: Supplementary file 3 [file Table6.XLSX]

## Sheet: Tub_progenitors0.MutVsCTRL.DEGs
Gene	p_val	avg_logFC	pct.1	pct.2	p_val_adj
Rpl29	8.40794e-89	-0.368707	1	1	2.38701e-85
Rplp0	1.7483e-81	-0.111925	1	1	2.48172e-78
Rps2	2.27888e-70	0.37236	1	1	2.15658e-67
Uba52	3.40499e-53	0.554349	0.996	0.996	2.41669e-50
Gm10260	6.21101e-39	1.73276	0.522	0.04	3.52661e-36
Rps18	1.11508e-38	-0.128364	1	1	5.27618e-36
Eif3j1	1.20554e-28	0.609024	0.826	0.47	4.88934e-26
Hspa8	1.1056e-26	0.350899	1	1	3.92351e-24
Tmsb10	3.29643e-25	0.405221	0.996	1	1.03984e-22
H3f3a	1.38815e-24	0.260424	1	1	3.94096e-22
Ubb	2.98718e-22	0.284919	1	1	7.70965e-20
Ppia	5.94346e-21	0.302328	1	1	1.40612e-18
Srsf2	1.65005e-19	0.430905	0.984	0.943	3.60346e-17
Erh	7.2975e-19	0.433783	0.939	0.883	1.47983e-16
Pebp1	6.88365e-18	0.310614	0.996	1	1.28495e-15
Hist1h2ap	7.2417e-18	0.632855	0.773	0.498	1.28495e-15
Cox5b	1.56982e-17	0.386618	0.988	0.976	2.6216e-15
Srsf3	2.42926e-17	0.36478	0.996	1	3.83148e-15
Tpm3-rs7	3.95154e-17	0.486847	0.506	0.142	5.90443e-15
Snrpg	8.10645e-15	0.356438	0.98	0.96	1.15071e-12
Ctdspl	1.29321e-14	0.457166	0.943	0.806	1.7483e-12
Nasp	1.55896e-13	0.496741	0.931	0.794	2.01176e-11
Calm1	2.88213e-13	0.382992	0.972	0.947	3.55756e-11
Hist3h2ba	7.65786e-13	0.488483	0.887	0.721	9.05861e-11
Rps21	1.58736e-12	0.173633	1	1	1.80261e-10
Hmgn2	1.89423e-12	0.414072	0.984	0.964	2.06836e-10
Gm10076	3.92082e-12	0.332652	0.988	0.935	4.12267e-10
Ddx5	5.61337e-12	0.304102	0.996	0.996	5.69155e-10
Des	7.64282e-12	-0.355925	0.377	0.599	7.48206e-10
Irak1bp1	1.01017e-11	0.357288	0.534	0.275	9.5596e-10
Psmb6	2.90613e-11	0.311213	0.984	0.972	2.66146e-09
Rpl35	4.10951e-11	0.183676	1	1	3.6459e-09
Serpinh1	5.60386e-11	0.29224	0.996	0.996	4.82102e-09
Ptma	6.21187e-11	0.241593	1	1	5.18692e-09
Sfpq	6.92825e-11	0.357167	0.976	0.951	5.6198e-09
Dynll1	8.03727e-11	0.317258	0.992	0.988	6.33828e-09
Stmn1	9.31707e-11	0.390259	1	0.992	7.14896e-09
Cfl1	1.90265e-10	0.26509	1	1	1.42148e-08
Oaz1	3.14142e-10	0.255525	1	1	2.28679e-08
Gnas	3.68779e-10	0.234689	1	1	2.61741e-08
Taldo1	4.21379e-10	0.332864	0.907	0.806	2.91779e-08
Mfge8	7.45911e-10	0.388581	0.85	0.725	5.042e-08
Uqcr11	9.63549e-10	0.282038	0.996	0.976	6.36167e-08
Gm10036	1.02756e-09	-0.243449	0.571	0.704	6.63009e-08
Eif5a	1.30636e-09	0.293085	0.996	0.996	8.24168e-08
Gstp1	2.25675e-09	0.323254	0.579	0.352	1.3905e-07
Ewsr1	2.35246e-09	0.326069	0.911	0.822	1.3905e-07
Gapdh	2.38712e-09	0.250007	1	1	1.3905e-07
Isyna1	2.39994e-09	0.345243	0.919	0.866	1.3905e-07
Cox6c	2.58186e-09	0.258963	0.996	1	1.46598e-07
Romo1	4.04468e-09	0.304742	0.96	0.879	2.25154e-07
Atp5a1	4.23461e-09	0.237505	1	1	2.31193e-07
Eif5	5.00273e-09	0.313363	0.992	0.935	2.67976e-07
Pdia6	5.32073e-09	0.298909	0.968	0.939	2.79487e-07
Pfn1	5.41451e-09	0.273342	1	0.992	2.79487e-07
Cnbp	5.52988e-09	0.266604	0.996	0.992	2.80345e-07
Actl6a	6.36575e-09	0.318941	0.842	0.68	3.13052e-07
Prdx2	6.39556e-09	0.223193	1	1	3.13052e-07
Rpl37	9.74731e-09	0.150898	1	1	4.69027e-07
Rbm3	1.09664e-08	0.255563	1	1	5.18894e-07
Nop56	1.55714e-08	0.308034	0.964	0.907	7.24708e-07
Psma7	1.86602e-08	0.268386	1	1	8.54458e-07
Smarca4	2.16335e-08	0.335364	0.85	0.721	9.74882e-07
Ndufa2	2.24416e-08	0.271771	0.992	0.951	9.82014e-07
Arl3	2.24836e-08	0.300437	0.923	0.834	9.82014e-07
Tomm7	2.30741e-08	0.270541	0.992	0.98	9.85591e-07
Srsf6	2.32598e-08	0.294548	0.931	0.862	9.85591e-07
Atp5b	2.60632e-08	0.237515	1	1	1.08814e-06
Hnrnpdl	2.7504e-08	0.310311	0.919	0.87	1.13165e-06
Hsp90aa1	2.89516e-08	0.286278	1	1	1.1742e-06
Arf5	3.08769e-08	0.279282	0.968	0.931	1.21999e-06
Mdk	3.09401e-08	0.350894	0.996	0.988	1.21999e-06
Hdac1	3.79363e-08	0.304147	0.773	0.607	1.47536e-06
Tubb5	4.00653e-08	0.27224	1	1	1.5371e-06
Rab26os	4.9053e-08	0.285579	0.587	0.344	1.85682e-06
Eif1	5.45829e-08	0.202933	1	1	2.03896e-06
Ube2l3	6.64694e-08	0.292332	0.931	0.822	2.45073e-06
Cdk4	6.93586e-08	0.260726	0.996	1	2.52447e-06
Rbm25	7.18919e-08	0.29458	0.988	0.976	2.58356e-06
mt-Cytb	7.54946e-08	0.231837	1	1	2.67911e-06
Pa2g4	7.70291e-08	0.297	0.931	0.895	2.69982e-06
Fam32a	8.11795e-08	0.296174	0.83	0.688	2.81059e-06
Hnrnpa3	8.85427e-08	0.305703	0.996	0.972	3.02859e-06
Dut	9.09869e-08	0.317676	0.931	0.887	3.07514e-06
Prmt1	1.02016e-07	0.240003	1	0.996	3.40732e-06
Phb	1.06064e-07	0.291706	0.866	0.717	3.50135e-06
Il11ra1	1.09594e-07	0.29832	0.563	0.393	3.5763e-06
Marcksl1	1.10858e-07	0.269809	1	0.988	3.57644e-06
Col1a2	1.16747e-07	0.296416	0.514	0.308	3.7241e-06
Elob	1.19673e-07	0.257282	1	0.988	3.73719e-06
Ppp1r14b	1.1979e-07	0.285346	1	0.988	3.73719e-06
Ndufa4	1.3988e-07	0.260905	0.996	0.992	4.31652e-06
Maged1	1.50186e-07	0.282977	0.96	0.911	4.54355e-06
Eno1	1.50438e-07	0.273262	0.996	0.996	4.54355e-06
Cnn3	1.53407e-07	0.287325	0.891	0.822	4.58444e-06
Ppp1ca	1.60121e-07	0.251521	0.996	0.992	4.73526e-06
Atp5e	1.66246e-07	0.232103	0.996	0.996	4.86568e-06
Kdelr2	1.75009e-07	0.305382	0.753	0.628	5.06991e-06
Timm13	2.16967e-07	0.26148	0.976	0.947	6.22191e-06
Tsc22d1	2.45595e-07	0.270993	1	0.996	6.97245e-06
Sec61g	2.49592e-07	0.242924	0.996	0.98	7.01576e-06
Bub3	3.25828e-07	0.286618	0.709	0.587	9.06889e-06
Gpx4	3.31192e-07	0.250324	0.992	0.98	9.12868e-06
Tmem234	3.8203e-07	0.280329	0.899	0.854	1.04287e-05
Spock2	3.92898e-07	0.310366	0.976	0.943	1.06232e-05
Snw1	4.03222e-07	0.269545	0.939	0.903	1.07492e-05
Phlda3	4.05129e-07	-0.209929	0.632	0.721	1.07492e-05
Myl6	4.85566e-07	0.245841	1	0.996	1.27619e-05
Ucp2	4.89977e-07	0.308336	0.798	0.684	1.27619e-05
Mxd4	5.02624e-07	0.284629	0.834	0.664	1.29723e-05
Ddx39b	5.53444e-07	0.259241	0.988	0.964	1.40396e-05
Ciapin1	5.53869e-07	0.274243	0.652	0.466	1.40396e-05
Hmga1	5.88845e-07	0.29508	0.437	0.202	1.47941e-05
Atp5k	6.19645e-07	0.242328	1	0.976	1.54313e-05
Samm50	6.71079e-07	0.278809	0.83	0.709	1.65669e-05
Ptms	7.99999e-07	0.287521	0.996	0.968	1.95793e-05
Psma4	8.2873e-07	0.259318	0.968	0.931	2.01091e-05
Hnrnpa1	8.53792e-07	0.196137	1	1	2.05416e-05
Fkbp1a	8.6545e-07	0.260317	0.951	0.964	2.06472e-05
Eif4a1	9.07212e-07	0.22042	1	1	2.13898e-05
Atp5j2	9.13789e-07	0.236664	0.996	0.992	2.13898e-05
Dnaja1	9.19181e-07	0.256937	1	0.992	2.13898e-05
Vcp	9.38567e-07	0.25347	0.992	0.976	2.16633e-05
Pnmt	1.03699e-06	0.353703	0.429	0.251	2.37247e-05
Fdps	1.04459e-06	0.306893	0.498	0.308	2.37247e-05
Ube2r2	1.13261e-06	0.265248	0.951	0.903	2.55197e-05
Hnrnpm	1.18518e-06	0.26531	0.988	0.968	2.6494e-05
Rps27	1.24251e-06	0.146865	1	1	2.75584e-05
Wdfy1	1.29045e-06	0.2695	0.466	0.275	2.83999e-05
Esd	1.3276e-06	0.253493	0.964	0.911	2.89927e-05
Xylt1	1.41339e-06	0.267479	0.603	0.356	3.06306e-05
Psmc5	1.44947e-06	0.258489	0.939	0.887	3.11746e-05
D8Ertd738e	1.67837e-06	0.257255	0.968	0.923	3.58262e-05
Sparc	1.722e-06	0.274958	0.996	1	3.64833e-05
Tomm40	1.74379e-06	0.269569	0.895	0.838	3.66712e-05
Ptpn1	1.76318e-06	0.271934	0.672	0.506	3.68065e-05
H2afy	1.77719e-06	0.236905	0.988	1	3.6828e-05
Pcbp1	1.86116e-06	0.247305	0.98	0.955	3.82887e-05
Chmp6	2.04051e-06	0.251951	0.534	0.34	4.16764e-05
Trim28	2.12186e-06	0.262446	0.951	0.923	4.30283e-05
Wdr83os	2.24421e-06	0.267801	0.879	0.725	4.51866e-05
Ssr2	2.30863e-06	0.257647	0.955	0.927	4.61564e-05
Nudc	2.37293e-06	0.246418	0.984	0.968	4.71101e-05
Map2k3	2.38958e-06	0.267262	0.753	0.551	4.71112e-05
Snrpf	2.40696e-06	0.238448	0.984	0.98	4.71266e-05
Ap1s1	2.53538e-06	0.273666	0.725	0.563	4.9301e-05
Aimp2	2.78986e-06	0.262192	0.696	0.538	5.38803e-05
Apex1	3.05816e-06	0.260366	0.947	0.907	5.86371e-05
mt-Co3	3.07747e-06	0.183379	1	1	5.86371e-05
Slc25a3	3.13628e-06	0.196799	1	1	5.93594e-05
Actb	3.38174e-06	0.249154	1	1	6.35812e-05
Bnip3	3.59549e-06	-0.203671	0.328	0.502	6.70873e-05
Sumo2	3.61548e-06	0.202393	0.992	0.996	6.70873e-05
Ssb	3.64819e-06	0.243773	0.996	0.976	6.72545e-05
Cox7c	3.75064e-06	0.20393	0.996	1	6.86972e-05
Git2	3.86565e-06	0.263129	0.619	0.429	7.03499e-05
Uqcrc1	4.00069e-06	0.255501	0.947	0.883	7.23436e-05
Pomp	4.04202e-06	0.244453	0.972	0.955	7.26285e-05
Eif3j2	4.15909e-06	-0.187334	0.425	0.575	7.4262e-05
Prdx1	4.2128e-06	0.244727	1	0.988	7.47509e-05
Tnpo3	4.35432e-06	0.274091	0.709	0.534	7.67822e-05
Slc9a3r1	4.53219e-06	0.272448	0.688	0.547	7.94253e-05
Parl	4.6401e-06	0.254034	0.648	0.462	8.08174e-05
Set	4.75914e-06	0.235792	1	1	8.23854e-05
Tma7	5.05292e-06	0.25914	0.988	0.968	8.69408e-05
Tuba1a	5.57089e-06	0.307708	0.895	0.777	9.48826e-05
Smarce1	5.58133e-06	0.253527	0.951	0.919	9.48826e-05
Brd2	5.65613e-06	0.267958	0.765	0.704	9.55818e-05
Pfn2	5.86044e-06	0.257273	0.607	0.449	9.84485e-05
Lmnb1	6.17335e-06	0.302608	0.838	0.725	0.000103095
Nrbp1	6.44957e-06	0.25927	0.709	0.595	0.000107078
Mcm5	6.59555e-06	0.290441	0.466	0.308	0.000108865
Bcam	6.71564e-06	0.288861	0.591	0.441	0.000110206
Rpl37a	6.84679e-06	0.134396	1	1	0.000111713
Snrpa1	7.15564e-06	0.263978	0.85	0.733	0.000116085
Dtymk	7.26182e-06	0.262242	0.794	0.773	0.000116786
Gm13305	7.28113e-06	-0.257364	0.134	0.401	0.000116786
Mdh2	7.347e-06	0.232886	0.972	0.964	0.000117181
Cbx1	7.82954e-06	0.231102	0.996	0.976	0.000124179
Smc1a	8.56428e-06	0.283781	0.939	0.915	0.000135078
Tmem258	8.92461e-06	0.239424	0.964	0.931	0.000139983
Alad	8.98497e-06	-0.165176	0.53	0.672	0.000140156
Tyms	9.08285e-06	0.271288	0.526	0.389	0.000140908
Orc6	9.75973e-06	0.254585	0.636	0.453	0.000150586
Zcchc7	9.91233e-06	0.25236	0.652	0.502	0.000152114
P4hb	1.01512e-05	0.250316	0.87	0.818	0.000154942
Maged2	1.02706e-05	0.271553	0.838	0.704	0.000155927
Meox1	1.0579e-05	-0.233839	0.543	0.668	0.000159754
Aprt	1.12336e-05	0.239099	0.976	0.976	0.000168742
Hnrnpk	1.13603e-05	0.205174	1	1	0.000169425
Adrm1	1.14543e-05	0.257555	0.741	0.636	0.000169425
Fubp1	1.14581e-05	0.236904	0.984	0.964	0.000169425
Nme1	1.17827e-05	0.268738	0.988	0.996	0.000173321
Ube2n	1.2177e-05	0.255755	0.895	0.854	0.000178199
Psmd13	1.27756e-05	0.249615	0.846	0.741	0.000185999
Rnf187	1.32752e-05	0.239543	0.943	0.915	0.000192287
Rpl27	1.34028e-05	0.210934	0.996	0.996	0.00019315
Tspan31	1.3759e-05	0.24658	0.68	0.579	0.000197281
Eif4h	1.385e-05	0.237635	0.951	0.947	0.000197588
Dynlt1f	1.43982e-05	0.241873	0.619	0.457	0.000204382
Cct3	1.46969e-05	0.213552	0.988	0.984	0.000207585
Grcc10	1.53911e-05	0.240303	0.664	0.482	0.000216314
Ryk	1.5585e-05	0.255584	0.923	0.883	0.00021796
Usp1	1.58206e-05	0.271384	0.603	0.474	0.00022017
Fus	1.59413e-05	0.229929	0.988	0.976	0.000220768
Ddost	1.76558e-05	0.249328	0.919	0.85	0.000243325
Psma1	1.82878e-05	0.242868	0.907	0.846	0.000250555
Sel1l3	1.83833e-05	0.312296	0.405	0.19	0.000250555
Minpp1	1.84954e-05	0.232169	0.579	0.389	0.000250555
Rtf1	1.85335e-05	0.24661	0.935	0.879	0.000250555
Ppp2r2d	1.88256e-05	0.233501	0.555	0.368	0.000253297
Dnajc3	1.9735e-05	0.238085	0.538	0.368	0.000264282
mt-Atp6	2.01035e-05	0.161401	1	1	0.000267952
Ndufs2	2.07137e-05	0.220159	0.988	0.96	0.000273585
Psmb7	2.07188e-05	0.241972	0.887	0.838	0.000273585
Prr5l	2.15003e-05	0.238411	0.518	0.34	0.000281504
Sgcg	2.15169e-05	-0.313519	0.109	0.312	0.000281504
Osr1	2.19958e-05	0.311278	0.704	0.575	0.000286449
Hnrnpa2b1	2.2121e-05	0.261754	0.996	0.996	0.000286765
Nnat	2.24656e-05	0.326684	0.802	0.729	0.000289909
Ndufv1	2.30118e-05	0.245247	0.87	0.806	0.000295613
Luc7l3	2.42908e-05	0.247951	0.972	0.927	0.000310638
Cdc42	2.57436e-05	0.225898	0.968	0.943	0.00032774
Hmgn1	2.65751e-05	0.211324	1	1	0.000336815
Anapc13	2.6783e-05	0.249955	0.891	0.814	0.000337942
mt-Nd4	2.70204e-05	0.193181	1	1	0.000339429
Zfp422	2.75084e-05	0.246099	0.765	0.636	0.000344037
Sf3b4	2.90866e-05	0.269664	0.684	0.551	0.000362179
Fkbp3	2.96018e-05	0.221258	0.992	0.976	0.000366985
Hmgb2	3.04644e-05	0.354706	0.903	0.895	0.000376036
Manf	3.27318e-05	0.256663	0.858	0.741	0.000402276
Ttc28	3.32416e-05	0.249492	0.984	0.976	0.00040678
Tra2b	3.39611e-05	0.241634	0.972	0.968	0.000413801
mt-Nd1	3.49445e-05	0.218621	1	1	0.000423963
Mtch1	3.56574e-05	0.229225	0.988	0.955	0.000430771
Mpzl1	3.61788e-05	0.25922	0.814	0.721	0.000435218
Ctsd	3.6401e-05	0.238663	0.822	0.757	0.000436044
Dcx	3.66701e-05	-0.207639	0.304	0.445	0.000437422
Pcbp4	4.06719e-05	0.237946	0.923	0.899	0.000483128
H2afz	4.23801e-05	0.266816	1	1	0.000501321
Tmpo	4.30467e-05	0.255286	0.842	0.773	0.000507086
Ube2g1	4.32247e-05	0.216856	0.506	0.368	0.000507086
Cycs	4.46067e-05	0.265814	0.781	0.709	0.000521146
Tipin	4.53263e-05	0.257724	0.595	0.518	0.000527383
Crip1	4.6768e-05	0.231529	0.563	0.368	0.000541936
Tpbg	4.7342e-05	0.248936	0.603	0.466	0.000546357
Ube2k	5.08542e-05	0.242446	0.858	0.785	0.000583859
Foxc1	5.10028e-05	0.249013	0.607	0.47	0.000583859
Maf	5.31085e-05	-0.264152	0.328	0.397	0.000605522
Ppa1	5.33397e-05	0.249858	0.838	0.741	0.000605726
Gdi2	5.74454e-05	0.222026	0.964	0.951	0.000649751
Taf10	5.77927e-05	0.236018	0.883	0.794	0.000651085
Psmb3	5.92939e-05	0.239655	0.935	0.87	0.000665357
Actg1	6.21087e-05	0.224698	1	1	0.000694199
Smarcd1	6.27871e-05	0.241666	0.769	0.733	0.00069903
Arf1	6.32198e-05	0.220901	0.976	0.972	0.000699692
Ptpa	6.33395e-05	0.231886	0.611	0.49	0.000699692
Ube2i	6.4291e-05	0.215991	0.988	0.98	0.000707451
Hnrnpu	6.4719e-05	0.245275	0.996	1	0.000709411
Usp50	6.93153e-05	0.236537	0.47	0.36	0.000754758
Psma3	6.93877e-05	0.220109	0.976	0.984	0.000754758
Srsf10	7.37076e-05	0.236644	0.919	0.866	0.000797738
Crip2	7.3901e-05	0.256277	0.664	0.522	0.000797738
Morf4l2	7.47311e-05	0.231698	0.955	0.939	0.000803642
Ilf2	7.98048e-05	0.229439	0.943	0.923	0.000852807
Zfp553	7.99037e-05	0.215915	0.547	0.381	0.000852807
Zfp280d	8.06026e-05	0.225527	0.64	0.47	0.000857044
Cox4i1	8.26119e-05	0.162356	1	1	0.000875131
Hoxa5	8.56384e-05	0.215975	0.474	0.3	0.000903819
Eif3a	8.72052e-05	0.234861	0.996	0.992	0.000916946
Ppil1	8.98536e-05	0.225738	0.7	0.563	0.000938373
Snrpa	8.9904e-05	0.23107	0.883	0.818	0.000938373
Atp5g3	9.04066e-05	0.219257	0.992	0.964	0.000940162
Hoxb2	9.14178e-05	0.254629	0.769	0.664	0.000947208
Ndufa5	9.21491e-05	0.230741	0.915	0.838	0.000951313
Rtf2	9.26371e-05	0.224554	0.652	0.51	0.000952886
Hnrnpd	0.000103271	0.220507	0.992	0.98	0.00105843
Cyc1	0.000103767	0.227857	0.939	0.814	0.00105969
Hnrnpr	0.000106117	0.211823	0.968	0.972	0.0010798
Atp5g2	0.000106775	0.180837	1	1	0.00108262
Wdr6	0.000109426	0.230748	0.745	0.632	0.00110492
Mfap4	0.000109752	0.260125	0.911	0.838	0.00110492
Aes	0.000110285	0.216939	0.992	0.992	0.00110636
Tbpl1	0.000112362	0.212448	0.571	0.377	0.00112323
Sec61b	0.000113825	0.20527	0.992	0.976	0.00113386
Suclg1	0.000115731	0.225258	0.915	0.785	0.00114882
Fmc1	0.000117553	0.236605	0.709	0.571	0.00116284
Telo2	0.00011874	0.242425	0.433	0.308	0.0011705
Cdh2	0.000122286	0.230069	0.773	0.619	0.00120109
Map2k2	0.000122689	0.234083	0.891	0.874	0.00120109
Tsn	0.000123418	0.223552	0.96	0.927	0.00120407
Rrs1	0.000125627	0.220473	0.676	0.563	0.00122142
Calm2	0.000129431	0.208994	1	0.992	0.00125173
Cnih1	0.000129626	0.217879	0.615	0.506	0.00125173
Top1	0.000138354	0.218921	1	1	0.00133148
Snrpc	0.000140885	0.231387	0.883	0.862	0.00135125
Mrpl58	0.000142343	0.225353	0.83	0.773	0.00136065
Ran	0.000147832	0.225697	0.988	0.996	0.00140837
Mcm3	0.000148674	0.282471	0.615	0.498	0.00141166
Vkorc1	0.000152249	-0.138964	0.494	0.607	0.00143803
Pclaf	0.000152465	0.40334	0.336	0.211	0.00143803
Srrt	0.000153509	0.226579	0.749	0.66	0.00144309
Capza2	0.000157459	0.226259	0.87	0.806	0.00147533
Csnk2b	0.000160093	0.22741	0.939	0.866	0.00149508
Atp5j	0.000160698	0.196995	0.996	0.996	0.00149581
Nop58	0.000163726	0.232266	0.964	0.947	0.00151901
Nae1	0.000169289	0.218978	0.623	0.538	0.00156551
Ndufa1	0.000173599	0.22022	0.802	0.656	0.00160015
Phf5a	0.000174559	0.224169	0.915	0.842	0.0016038
Luzp1	0.000176207	0.228756	0.749	0.66	0.00161372
Tgfbi	0.000183116	-0.134087	0.964	0.988	0.00167159
Gpx1	0.000186291	0.227217	0.895	0.83	0.00169513
Mrfap1	0.000188711	0.183406	0.996	0.996	0.00171166
Eif4e	0.000190475	0.21993	0.83	0.68	0.00172104
Ncam1	0.000190958	0.240257	0.972	0.943	0.00172104
Smc6	0.000195062	0.248739	0.785	0.737	0.00175247
Polr2a	0.00019728	0.242641	0.777	0.664	0.00176681
Serp1	0.000200382	0.218649	0.668	0.538	0.00178895
Ddx18	0.000202352	0.218282	0.887	0.814	0.00179845
Adsl	0.000202795	0.224751	0.518	0.36	0.00179845
Hnrnpc	0.000203347	0.202682	0.996	0.992	0.00179845
Sem1	0.000205131	0.205245	0.988	1	0.00180859
Tssc4	0.000207698	0.21552	0.567	0.453	0.00182218
Brix1	0.000207982	0.222405	0.761	0.676	0.00182218
Ctxn1	0.000208598	0.241061	0.85	0.789	0.00182218
Pdcd4	0.000209802	0.21688	0.951	0.923	0.00182708
Ostc	0.000212318	0.218203	0.911	0.798	0.00184334
Ppid	0.000213279	0.220129	0.899	0.846	0.00184603
Ptn	0.0002164	0.283275	0.822	0.781	0.00186736
Hoxb9	0.000222878	0.267609	0.818	0.717	0.00191742
Naa10	0.000224682	0.219488	0.846	0.745	0.0019271
Rragd	0.000226649	-0.13776	0.466	0.551	0.00193512
Sec62	0.000226979	0.227289	0.964	0.911	0.00193512
Snhg12	0.000228818	0.230165	0.87	0.798	0.00193963
Slc25a5	0.000228876	0.241397	0.96	0.951	0.00193963
Nsmce1	0.000234234	0.224286	0.741	0.64	0.00197914
Scnm1	0.000235957	-0.137201	0.389	0.518	0.00198778
Ccdc124	0.000239274	0.213047	0.672	0.518	0.00200403
Ankrd11	0.000239298	0.235328	0.96	0.955	0.00200403
Mdh1	0.000242365	0.210587	0.972	0.939	0.00201953
Upf3b	0.000242977	0.237733	0.777	0.745	0.00201953
Hnrnpll	0.000243374	0.214494	0.611	0.486	0.00201953
Arf4	0.000243994	0.21189	0.943	0.911	0.00201953
Pdia3	0.000245885	0.244453	0.891	0.854	0.0020247
Larp7	0.000246045	0.220723	0.781	0.757	0.0020247
Trp53	0.000247387	0.231314	0.862	0.777	0.00202986
Mcm7	0.000250238	0.250705	0.834	0.781	0.00204734
Ybx1	0.000252353	0.189858	1	1	0.0020587
Hmgb1	0.000258399	0.216093	1	1	0.00210199
Ylpm1	0.000259527	0.235906	0.599	0.486	0.00210329
Ywhah	0.00026004	0.218553	0.737	0.623	0.00210329
Atp5d	0.0002656	0.181853	1	1	0.00213773
Khdrbs1	0.000265804	0.227638	0.911	0.899	0.00213773
Cops6	0.000269755	0.218447	0.899	0.862	0.00215846
G3bp1	0.000270471	0.20857	0.988	0.972	0.00215846
Rpl36	0.000270663	0.134269	1	1	0.00215846
Naa35	0.000272321	0.214011	0.66	0.518	0.0021656
Psmd1	0.000273212	0.221809	0.822	0.696	0.00216661
Dnajc19	0.000278322	0.211806	0.753	0.591	0.00219944
G3bp2	0.000278901	0.216417	0.899	0.834	0.00219944
Nedd8	0.000284839	0.199309	1	0.98	0.00224005
Nop14	0.000289822	0.22436	0.7	0.607	0.00227294
Malat1	0.000297606	-0.131886	1	1	0.00232756
Slbp	0.000300713	0.228113	0.769	0.68	0.0023454
Psmd6	0.000310571	0.211309	0.895	0.87	0.00241565
Cul3	0.000317257	0.215167	0.838	0.696	0.00246091
Coq5	0.000326002	0.202058	0.619	0.413	0.00252036
Psmd14	0.000327144	0.21498	0.717	0.595	0.00252036
Rnh1	0.000327585	0.212636	0.814	0.717	0.00252036
Fth1	0.000336147	0.169228	1	1	0.00257925
Pja2	0.000337141	0.210592	0.704	0.526	0.0025799
Ptbp1	0.00034117	0.217027	0.85	0.806	0.00260372
St3gal6	0.000347492	-0.139437	0.397	0.575	0.00264148
Mrpl38	0.00034798	0.218254	0.725	0.619	0.00264148
Tmem256	0.000349868	0.214626	0.883	0.83	0.00264874
Psmd7	0.000353917	0.20786	0.976	0.943	0.00267226
Srsf7	0.000369089	0.216223	0.955	0.919	0.00277943
Ndrg2	0.000373055	-0.133219	0.409	0.53	0.00280013
Eef1akmt1	0.000373811	0.210745	0.623	0.494	0.00280013
Ash2l	0.000388143	0.211487	0.785	0.668	0.00289841
Nsd2	0.000389685	0.216549	0.603	0.47	0.00289841
Mrps36	0.000389994	0.211696	0.725	0.619	0.00289841
Psmc3	0.000399739	0.209338	0.943	0.87	0.00296308
Sumo1	0.000402211	0.199546	0.96	0.96	0.00297363
Rps27rt	0.000404497	-0.137201	0.389	0.506	0.00298277
Kmt5a	0.000414992	0.233994	0.717	0.623	0.00305223
Dynlrb1	0.000416847	0.210003	0.911	0.826	0.00305796
Pcmtd1	0.00041821	-0.134139	0.466	0.575	0.00306005
Vdac3	0.000419467	0.204369	0.96	0.943	0.00306136
Lrrc59	0.000424555	0.213731	0.704	0.615	0.00309054
Txn1	0.00042758	0.210377	0.992	0.964	0.00310461
Eif2s1	0.000432079	0.211696	0.834	0.838	0.00312432
Mea1	0.000432496	0.20707	0.64	0.571	0.00312432
Dcakd	0.000442111	0.225203	0.789	0.688	0.00317783
Nsrp1	0.000442142	0.230571	0.802	0.729	0.00317783
Timm17a	0.000450264	0.209815	0.814	0.741	0.00322803
Cirbp	0.000454033	0.214346	0.781	0.672	0.00324552
Ssbp4	0.00045499	0.227784	0.939	0.887	0.00324552
Tsfm	0.000456737	0.201534	0.619	0.482	0.00324982
Il33	0.000461356	-0.249635	0.466	0.591	0.00327448
Brd4	0.000474019	0.213848	0.785	0.7	0.00335596
Ube2d2a	0.000475948	0.210527	0.887	0.777	0.00336123
Arpc5l	0.000477992	0.214923	0.757	0.628	0.00336729
Anxa6	0.000485941	0.19728	0.555	0.381	0.00341482
Ccar1	0.000488305	0.229671	0.899	0.842	0.00342296
Med8	0.000490866	0.20174	0.64	0.51	0.00343099
Ndufa12	0.000492676	0.20882	0.947	0.943	0.00343099
Dnaja2	0.000493077	0.210459	0.911	0.87	0.00343099
Cby1	0.000496309	0.192024	0.506	0.397	0.00344504
Tecr	0.000503394	0.200267	0.984	0.984	0.0034842
Ctdnep1	0.000504405	0.213259	0.709	0.575	0.0034842
Timm50	0.000507571	0.208401	0.696	0.632	0.00349211
Ppil4	0.000508862	0.208444	0.68	0.551	0.00349211
Hnrnpab	0.00050924	0.210364	0.976	0.972	0.00349211
Exosc8	0.000517416	0.221911	0.656	0.607	0.00353811
Guk1	0.000518441	0.209229	0.777	0.664	0.00353811
Atp5l	0.000521114	0.187677	0.988	0.988	0.00354782
Zfp428	0.000524279	0.220342	0.773	0.696	0.00356083
Anp32b	0.000529151	0.198654	0.996	0.996	0.00358014
Uqcrq	0.000529644	0.224013	0.935	0.903	0.00358014
Mob2	0.000544362	0.1923	0.49	0.344	0.00367089
Ahctf1	0.000545947	0.20499	0.51	0.405	0.00367285
Sf3b5	0.000555164	0.210057	0.858	0.826	0.00372058
Nectin2	0.000555663	0.254943	0.713	0.591	0.00372058
Jtb	0.000558251	0.201866	0.676	0.571	0.00372337
Idh3g	0.000558702	0.213513	0.83	0.785	0.00372337
Zdhhc20	0.000570053	0.202843	0.615	0.494	0.00379012
Eif2s2	0.000584648	0.192663	1	0.996	0.00387808
Cops8	0.000591701	0.20555	0.794	0.696	0.00391571
Mrpl18	0.000595623	0.211705	0.891	0.826	0.0039325
Ganab	0.000598872	0.197964	0.522	0.377	0.00394477
H19	0.000601591	0.277978	0.789	0.7	0.00395351
Gorasp2	0.000605342	0.20418	0.506	0.36	0.00396017
Pepd	0.000605394	0.203912	0.717	0.615	0.00396017
Tmem263	0.000608564	0.190044	0.462	0.308	0.00396387
Magoh	0.000608752	0.206947	0.915	0.854	0.00396387
Sfr1	0.00061852	0.199633	0.984	0.964	0.00401671
Clmp	0.000619697	0.22714	0.943	0.874	0.00401671
Cdc5l	0.000623139	0.220323	0.757	0.717	0.00402982
Ung	0.000625108	0.237902	0.555	0.421	0.00403337
Snrpb	0.000631819	0.195994	0.988	0.992	0.00406742
Brd3	0.000638094	0.236235	0.83	0.741	0.00409853
Mrpl12	0.000640963	0.215791	0.931	0.87	0.00410766
Ndufb8	0.000653282	0.202046	0.972	0.955	0.00416823
Mcm2	0.000653351	0.216486	0.567	0.482	0.00416823
Tle1	0.000656584	0.191413	0.506	0.364	0.00417947
Emd	0.000668078	0.210862	0.579	0.478	0.00423527
Flywch1	0.000668335	0.1918	0.47	0.332	0.00423527
Stk4	0.000678464	0.199523	0.413	0.239	0.00428989
Tfdp1	0.000682181	0.197628	0.567	0.405	0.0043038
Cited2	0.000685946	0.286595	0.794	0.696	0.00431796
H2afy2	0.000690898	0.213405	0.842	0.757	0.00433951
Dhx34	0.000703654	0.261687	0.372	0.267	0.00440988
Ywhag	0.000705311	0.206262	0.644	0.547	0.00441052
Rrp1	0.000707944	0.195644	0.951	0.964	0.00441726
Psmd2	0.000710593	0.210318	0.866	0.822	0.00442407
Smad4	0.000714465	0.207122	0.81	0.757	0.00443844
Smarcb1	0.000720843	0.206235	0.858	0.802	0.00446665
Ctbp2	0.000723182	0.205513	0.587	0.462	0.00446665
H1f0	0.000723726	-0.119499	0.814	0.85	0.00446665
Nap1l4	0.000727955	0.206557	0.883	0.773	0.004483
Nelfcd	0.000736326	0.192372	0.583	0.474	0.00452474
Edf1	0.000738128	0.203265	0.943	0.899	0.00452602
Gnb2	0.000743139	0.209374	0.988	0.992	0.00454189
Eif4a3	0.0007447	0.206216	0.862	0.838	0.00454189
Hells	0.000745516	0.278787	0.417	0.304	0.00454189
9930021J03Rik	0.000758834	0.197936	0.733	0.579	0.00461313
Tmem9	0.000761258	0.20086	0.733	0.567	0.00461797
Nsmce4a	0.000764011	0.208491	0.846	0.789	0.00462479
Hoxb5os	0.000776299	0.237072	0.445	0.385	0.00468072
Rbmx	0.000776547	0.215049	0.709	0.607	0.00468072
Wsb1	0.000781006	0.196354	0.571	0.433	0.0046828
Igfbp2	0.000782549	0.242712	0.915	0.858	0.0046828
N4bp2	0.000783272	0.205799	0.619	0.506	0.0046828
Prpf40a	0.000783491	0.205734	0.947	0.919	0.0046828
Glo1	0.000791651	0.201866	0.83	0.757	0.00472164
Rfc3	0.000805484	0.208491	0.64	0.482	0.0047856
Aco2	0.000805747	0.204051	0.895	0.798	0.0047856
Phc2	0.000812672	0.194013	0.611	0.478	0.00481665
Srrm1	0.000815111	0.207265	0.951	0.911	0.00482104
Psmc1	0.000822087	0.203302	0.83	0.741	0.00483866
Dnttip1	0.000823051	0.200486	0.709	0.64	0.00483866
Cenpx	0.000823203	0.210617	0.692	0.575	0.00483866
Coa3	0.000834953	0.205852	0.822	0.785	0.00489759
Ndufa3	0.000842166	0.206821	0.923	0.891	0.00492971
Cox7b	0.000856942	0.185415	0.976	0.964	0.00500588
Cpxm1	0.000864816	0.216048	0.887	0.846	0.00504151
Synj2bp	0.000869113	0.188591	0.522	0.368	0.00505617
Ap2m1	0.000872131	0.206863	0.838	0.777	0.00506335
Txn2	0.000877007	0.207037	0.85	0.806	0.00508127
Arglu1	0.000882381	0.203809	0.972	0.923	0.005102
Ppp2ca	0.000888623	0.19847	0.951	0.931	0.00512764
Vdac1	0.000906322	0.183947	0.996	0.984	0.00521916
Dido1	0.000918096	0.185852	0.543	0.389	0.00527626
Abhd17a	0.000932602	0.200031	0.822	0.7	0.0053488
Sar1a	0.000937485	0.201228	0.704	0.615	0.00536597
Fos	0.000957464	-0.200157	0.765	0.802	0.00545902
Gatd1	0.000957587	0.185363	0.575	0.425	0.00545902
Banf1	0.000961789	0.211067	0.927	0.935	0.00547198
Yeats4	0.000973978	0.203512	0.826	0.765	0.00553025
Tvp23b	0.000980792	-0.119189	0.453	0.538	0.00555782
Rnf10	0.000994658	0.199731	0.704	0.571	0.00562517
Bbc3	0.00100125	0.19671	0.409	0.271	0.00565117
Chd1	0.00101846	0.204344	0.7	0.619	0.00572041
Cops3	0.00101903	0.201008	0.745	0.668	0.00572041
Eif4g2	0.00101956	0.199221	0.992	0.992	0.00572041
Gart	0.00102829	0.200471	0.672	0.49	0.00575799
H13	0.00104188	0.210625	0.842	0.753	0.00582266
Pdxdc1	0.00106765	0.184141	0.51	0.356	0.00595493
Skiv2l2	0.00109482	0.196211	0.632	0.51	0.00609447
Eprs	0.00110438	0.199106	0.98	0.947	0.00613569
Yap1	0.00113849	0.187977	0.538	0.417	0.00631283
Pmf1	0.00114283	0.188208	0.522	0.364	0.00632455
Snx6	0.00114676	0.200167	0.87	0.85	0.00632617
Atp5o.1	0.00114809	0.188854	0.996	0.98	0.00632617
Fgfr1	0.00115206	0.240862	0.923	0.879	0.00632617
Abcg2	0.00115373	0.182322	0.437	0.259	0.00632617
Crnkl1	0.00115683	0.190518	0.417	0.259	0.00632617
Scaf1	0.00115702	0.183227	0.514	0.385	0.00632617
Dnajc9	0.00115872	0.20817	0.672	0.526	0.00632617
Rnf168	0.00116352	0.195212	0.425	0.271	0.0063402
Mcrip1	0.00117016	0.204582	0.895	0.789	0.00636417
Zfr	0.00118075	0.20419	0.7	0.591	0.00639776
Slc25a39	0.00118085	0.199148	0.895	0.834	0.00639776
Mrpl27	0.00119586	0.193346	0.632	0.53	0.00646676
Zfp148	0.00120716	0.198302	0.757	0.672	0.00651547
Tcp1	0.00121731	0.18252	0.988	0.992	0.00654614
Prdm2	0.00121746	0.188458	0.462	0.316	0.00654614
Echs1	0.00123531	0.194676	0.935	0.874	0.00662872
Psmd12	0.00123749	0.195633	0.919	0.883	0.00662872
Ndufs4	0.00125087	0.19559	0.915	0.879	0.0066878
Fhl2	0.00126066	-0.167555	0.198	0.344	0.00672745
Ccdc85b	0.00126732	0.187983	0.636	0.474	0.00675034
Zfp326	0.00127506	0.205007	0.721	0.648	0.00677794
Polr2j	0.00127728	0.197567	0.903	0.862	0.00677794
Cd24a	0.00128257	0.201825	0.98	0.972	0.00679329
Aldh1a2	0.00128864	-0.163269	0.587	0.769	0.00681274
Akr7a5	0.00129635	0.203869	0.874	0.785	0.00684076
Fkbp10	0.00137393	0.203599	0.704	0.595	0.00723669
Thoc3	0.00138844	0.195943	0.802	0.656	0.00729957
Cops5	0.0014002	0.197619	0.895	0.854	0.00734784
Sh3gl1	0.0014061	0.183683	0.498	0.393	0.00736517
Cotl1	0.00141352	0.221161	0.672	0.591	0.00739038
Lyar	0.00141732	0.209413	0.887	0.907	0.00739662
Bcl2	0.00142927	0.246266	0.806	0.733	0.00744533
Dusp11	0.00143311	0.191408	0.717	0.648	0.00745166
Ranbp3	0.0014468	0.178537	0.49	0.356	0.00750908
Nxf1	0.00146037	0.211525	0.919	0.862	0.00756569
Gnai2	0.00146419	0.201784	0.972	0.984	0.00757164
Fnta	0.00147357	0.195156	0.757	0.64	0.00760628
Prelid2	0.00149883	-0.11441	0.417	0.526	0.00772263
Mrpl30	0.00151079	0.190311	0.943	0.919	0.00777018
Sorbs2	0.00152585	0.234017	0.356	0.202	0.00783342
Kcnq1ot1	0.00154742	0.234089	0.996	0.968	0.00792984
Ppp1r14a	0.0015618	-0.146435	0.563	0.644	0.00798912
Nom1	0.00158931	0.183983	0.583	0.429	0.00811518
Uba2	0.00160109	0.198264	0.83	0.789	0.00814938
Trmt1	0.00160174	0.194271	0.745	0.648	0.00814938
Psip1	0.00161547	0.224922	0.915	0.911	0.00820069
Sh3bgrl3	0.00161761	0.196115	0.798	0.745	0.00820069
Junb	0.00163327	-0.135941	0.737	0.81	0.00826535
Ndufa10	0.00163651	0.194797	0.939	0.899	0.00826699
Pnkd	0.00164395	0.190889	0.729	0.64	0.00828982
Mrpl3	0.0016666	0.182724	0.632	0.47	0.00838917
Sucla2	0.00167794	0.187411	0.721	0.632	0.0084313
Polr1c	0.00169162	0.190704	0.761	0.648	0.00847689
Prim1	0.00169373	0.194517	0.401	0.259	0.00847689
Ccdc25	0.00169597	0.207829	0.405	0.251	0.00847689
Ywhab	0.00171861	0.20106	0.915	0.903	0.00857493
Arid4a	0.00172375	0.202941	0.551	0.405	0.00858551
Dnmt1	0.00174158	0.247002	0.53	0.47	0.00865908
Ctcf	0.00174828	0.196907	0.895	0.834	0.00867721
Tbca	0.00176599	0.182211	0.972	0.988	0.00874981
Psma2	0.0017767	0.185998	0.968	0.951	0.00878753
Cebpg	0.00183845	0.175542	0.551	0.364	0.00907712
Prpf38a	0.00186121	0.190326	0.704	0.611	0.00917357
Pmepa1	0.00187613	-0.129123	0.279	0.393	0.00923106
Calr	0.00189321	0.239601	0.968	0.976	0.00928078
Nsfl1c	0.0018952	0.194744	0.814	0.745	0.00928078
Trim35	0.00189604	0.219583	0.761	0.721	0.00928078
Smarcd3	0.00190815	0.178427	0.457	0.32	0.00932398
Akirin1	0.00192574	0.179868	0.445	0.312	0.00939377
Dad1	0.00193751	0.182185	0.988	0.947	0.00943496
Rfc1	0.00195085	0.204137	0.85	0.834	0.00948365
Anapc5	0.00197834	0.187705	0.935	0.927	0.00960089
Hspa5	0.00199047	0.238315	0.992	0.972	0.00963883
Atg3	0.00199295	0.176704	0.49	0.336	0.00963883
Gtpbp4	0.00202298	0.196815	0.87	0.814	0.00975159
Shisa3	0.00202314	-0.132586	0.571	0.628	0.00975159
Rpl10a	0.00207909	0.119102	1	1	0.010002
Hmg20b	0.00208469	0.202678	0.741	0.648	0.010002
Eya1	0.00208565	0.221297	0.834	0.834	0.010002
Mogs	0.00211018	0.191055	0.522	0.425	0.0100755
Fbxo22	0.00211148	0.18428	0.571	0.49	0.0100755
Baz1a	0.00211163	0.188983	0.526	0.401	0.0100755
Zfp821	0.00212105	0.174585	0.453	0.324	0.0100987
Camk2n1	0.00212362	-0.113944	0.599	0.668	0.0100987
Smim19	0.00212833	0.170996	0.494	0.372	0.0101042
Rxrb	0.00213201	0.178555	0.555	0.445	0.0101048
Eif3b	0.0021365	0.190669	0.879	0.785	0.0101092
Gtf2h5	0.00216935	0.198248	0.907	0.874	0.0102317
Rab10	0.0021696	0.188434	0.798	0.733	0.0102317
Negr1	0.00221766	-0.121488	0.486	0.575	0.010441
Foxp1	0.00222205	0.201605	0.955	0.927	0.0104444
Ywhaz	0.00223981	0.197344	0.931	0.907	0.0104669
Ap2a1	0.00224007	0.172579	0.534	0.368	0.0104669
Tpp1	0.00224121	0.175891	0.486	0.352	0.0104669
Uchl3	0.00224393	0.203165	0.733	0.656	0.0104669
Ndufaf2	0.0022453	0.190296	0.64	0.522	0.0104669
Nt5dc2	0.00224896	0.187642	0.984	0.992	0.0104669
Ppih	0.00227014	0.176722	0.559	0.437	0.0105482
Chtf8	0.00228209	0.189642	0.64	0.474	0.0105862
Ier5l	0.00228578	-0.107797	0.332	0.457	0.0105862
Smc3	0.00230758	0.205637	0.955	0.947	0.0106697
Rbm42	0.00232799	0.192206	0.66	0.567	0.0107304
Cyth3	0.00233155	-0.114094	0.563	0.688	0.0107304
Strap	0.00233204	0.186877	0.907	0.883	0.0107304
2610524H06Rik	0.00234005	0.189527	0.656	0.599	0.0107485
Aifm1	0.00234696	0.183799	0.68	0.51	0.0107485
Myc	0.0023502	0.196795	0.603	0.425	0.0107485
Psmb5	0.00235314	0.182441	0.984	0.988	0.0107485
Psmb4	0.0023549	0.186053	0.972	0.955	0.0107485
Keap1	0.00237094	0.184258	0.611	0.498	0.0108043
Axin1	0.00238643	0.175311	0.433	0.271	0.0108575
Uchl1	0.00239553	0.188591	0.393	0.231	0.0108814
Dhx15	0.00241054	0.212767	0.789	0.757	0.0109321
Fam53a	0.00241745	0.177561	0.522	0.453	0.010946
Limch1	0.00243297	-0.104943	0.514	0.591	0.0109987
Raly	0.00243791	0.198984	0.915	0.883	0.0110035
Ppp4r3b	0.00248413	0.187309	0.709	0.611	0.0111944
Srrm2	0.00252189	0.178504	0.988	1	0.0113298
Ak2	0.00252217	0.202583	0.935	0.866	0.0113298
Kpnb1	0.00253055	0.192704	0.729	0.66	0.0113495
Dock1	0.00253601	-0.107246	0.563	0.599	0.0113561
Rbbp7	0.00254253	0.195327	0.931	0.915	0.0113673
Appbp2	0.00255313	0.194156	0.64	0.551	0.0113968
Minos1	0.00261662	0.182773	0.98	0.96	0.0116618
Cib1	0.0026325	0.173272	0.421	0.312	0.0117113
Cox5a	0.00263598	0.191891	0.988	0.984	0.0117113
Uqcr10	0.0026719	0.186944	0.968	0.968	0.011852
Top3b	0.00267599	0.168623	0.441	0.324	0.011852
Glyr1	0.00270635	0.185056	0.692	0.583	0.0119678
Ywhaq	0.00272742	0.181214	0.984	0.984	0.0120422
Stip1	0.00274505	0.195974	0.887	0.777	0.0121012
Mapkap1	0.00275344	0.167054	0.526	0.364	0.0121194
Cdca7l	0.00277945	0.176187	0.397	0.275	0.012215
Nhp2	0.00279235	0.210747	0.862	0.806	0.0122527
Evl	0.00280265	0.188105	0.749	0.704	0.0122789
Cdca7	0.00280842	0.204725	0.672	0.619	0.0122852
Pax2	0.00281842	0.241938	0.96	0.955	0.01231
Pcbp2	0.00282792	0.197517	0.972	0.968	0.0123224
Hras	0.00282993	0.19074	0.773	0.66	0.0123224
H2afv	0.00284283	0.223252	0.988	0.984	0.0123596
Gps1	0.00286189	0.186102	0.789	0.7	0.0124234
Irak1	0.00287964	0.178198	0.575	0.441	0.0124659
Calm3	0.00288047	0.186995	0.874	0.777	0.0124659
Nucks1	0.00290736	0.243916	0.931	0.899	0.0125632
Mpnd	0.00291264	0.186348	0.761	0.652	0.0125669
Eri1	0.00292382	0.165324	0.498	0.372	0.0125959
Ppig	0.00294138	0.195888	0.98	0.915	0.0126524
Hdhd2	0.0029745	0.176863	0.563	0.462	0.0127755
Arpc1b	0.00298972	0.180766	0.615	0.474	0.0128215
Eef2	0.00300062	0.141502	1	1	0.0128471
Igfbp4	0.00300475	0.205931	0.802	0.672	0.0128471
Rcbtb2	0.00301648	0.187446	0.725	0.652	0.0128766
Usp34	0.00302072	0.19917	0.83	0.761	0.0128766
Brd1	0.00302775	0.186691	0.806	0.733	0.0128872
Acat2	0.0030393	0.17265	0.429	0.271	0.012917
Bzw1	0.00305029	0.189918	0.947	0.911	0.0129443
Mri1	0.00307097	0.17084	0.494	0.368	0.0130127
Col18a1	0.00308309	0.181866	0.457	0.324	0.0130446
Son	0.00308912	0.178412	0.996	0.984	0.0130506
Tor2a	0.00314443	0.166839	0.494	0.348	0.0132645
Ppib	0.00315956	0.167304	1	1	0.0132875
Aurkaip1	0.00316167	0.187366	0.891	0.858	0.0132875
Rpa2	0.00316391	0.196115	0.462	0.308	0.0132875
Ncbp1	0.00317456	0.171272	0.49	0.352	0.0133125
Srek1	0.00321321	0.196617	0.846	0.858	0.0134547
Naa50	0.00322861	0.185882	0.749	0.648	0.0134993
Emc10	0.00324156	0.184863	0.891	0.773	0.0135335
Gsta4	0.00325007	0.200333	0.883	0.834	0.0135491
Fkbp4	0.00325688	0.185351	0.992	0.951	0.0135576
Rac1	0.00329308	0.182761	0.911	0.85	0.0136882
Nradd	0.00332446	0.180584	0.68	0.623	0.0137985
Mrpl17	0.00341206	0.189499	0.858	0.814	0.0141213
Szrd1	0.00341219	0.164647	0.486	0.344	0.0141213
Mgea5	0.00344474	0.17073	0.49	0.401	0.0142353
Phf20	0.00345717	0.184922	0.632	0.518	0.0142575
Isy1	0.00346351	0.167961	0.433	0.279	0.0142575
Siva1	0.00346844	0.179813	0.98	0.955	0.0142575
4833420G17Rik	0.0034702	0.176872	0.672	0.555	0.0142575
Fgfbp3	0.00349797	-0.162519	0.142	0.32	0.0143508
Park7	0.00351197	0.183054	0.98	0.984	0.0143874
Maz	0.00354993	0.185668	0.87	0.818	0.0144978
Ncbp2	0.00355124	0.185655	0.749	0.644	0.0144978
Ash1l	0.00355423	0.191864	0.765	0.7	0.0144978
Puf60	0.00358846	0.183069	0.931	0.899	0.0146164
Psmb2	0.00362412	0.189534	0.911	0.887	0.0147258
Rpl41	0.0036257	0.123187	1	1	0.0147258
Mybbp1a	0.00365149	0.191486	0.87	0.814	0.0148094
Eif4e2	0.00367862	0.184047	0.879	0.858	0.0148981
Gfer	0.00369807	0.177983	0.696	0.559	0.0149556
Nisch	0.00373592	0.196511	0.943	0.931	0.0150871
Hist1h1c	0.00376518	-0.175204	0.223	0.336	0.0151837
Akr1b3	0.00378393	0.181286	0.668	0.579	0.0152377
Col3a1	0.00379973	0.17812	0.393	0.243	0.015264
Eci1	0.00380121	0.182322	0.757	0.619	0.015264
Dnttip2	0.0038144	0.18547	0.87	0.798	0.0152953
Ddx1	0.00386986	0.18253	0.919	0.822	0.0154958
Lrp10	0.00388329	0.194731	0.364	0.211	0.0155277
Rnf7	0.00389099	0.184558	0.919	0.838	0.0155366
Dhrs1	0.0039059	0.16525	0.563	0.381	0.0155742
Parp1	0.00396306	0.195125	0.879	0.814	0.01578
Atg4b	0.00398042	0.176279	0.417	0.287	0.0158224
Supt4a	0.00398631	0.183433	0.915	0.915	0.0158224
Chd8	0.00399044	0.184074	0.68	0.559	0.0158224
Snap47	0.00402422	0.1771	0.696	0.656	0.0159341
Bsg	0.00404217	0.164618	0.992	0.992	0.0159829
Ppat	0.00408112	0.169671	0.579	0.449	0.0161096
Mak16	0.00408557	0.176256	0.619	0.486	0.0161096
Mrgbp	0.0040982	0.165269	0.449	0.308	0.0161245
Ola1	0.0041007	0.183403	0.891	0.874	0.0161245
Phip	0.00412718	0.209684	0.854	0.773	0.0162062
Tpr	0.00413532	0.186856	0.988	0.98	0.0162157
Tmem208	0.00414478	0.177258	0.721	0.619	0.0162304
Ppp1cc	0.00416135	0.18287	0.955	0.887	0.0162728
Cdk2ap2	0.00417991	0.183923	0.575	0.457	0.0163229
Ppp4c	0.0041977	0.175527	0.64	0.538	0.0163699
Ube2m	0.00425207	0.192026	0.939	0.903	0.0165592
Deaf1	0.00427551	0.169418	0.413	0.271	0.0166276
Nubp1	0.00430244	0.173213	0.526	0.409	0.0167095
Atxn7l3b	0.00431444	0.167776	0.988	1	0.0167332
Aplp2	0.0043266	0.1943	0.903	0.854	0.0167574
Zfp593	0.00435549	0.171986	0.547	0.413	0.0168464
Gm266	0.00436282	0.194749	0.927	0.879	0.0168518
Ilk	0.00437275	0.174443	0.672	0.543	0.0168672
Casp3	0.00439402	0.166857	0.53	0.437	0.0169189
Tax1bp3	0.00440012	0.160773	0.474	0.348	0.0169189
Npm3	0.00440405	0.21923	0.943	0.927	0.0169189
Copz1	0.00444887	0.180262	0.822	0.672	0.0170597
Kansl3	0.0044527	0.16089	0.486	0.283	0.0170597
Smn1	0.00445988	0.179641	0.7	0.607	0.0170642
Eef1a1	0.00448279	0.109747	1	1	0.0171287
Naa15	0.00449888	0.18448	0.798	0.745	0.0171499
Fkbp8	0.0045022	0.193596	0.87	0.842	0.0171499
Psme2	0.00450645	0.177548	0.733	0.668	0.0171499
Baz1b	0.00453501	0.20138	0.761	0.725	0.0172355
Cct8	0.00455353	0.161009	0.992	0.996	0.0172827
Rev3l	0.00457493	0.176751	0.652	0.502	0.0173407
Ublcp1	0.00459076	0.16294	0.462	0.356	0.0173776
Ccnt1	0.00460783	0.179586	0.721	0.563	0.0174189
Rpl14	0.0046478	0.123071	1	1	0.0175467
Mrps10	0.00465918	0.174998	0.64	0.51	0.0175663
Usp19	0.00473291	0.177627	0.632	0.462	0.0178192
5430416N02Rik	0.00474346	0.163521	0.437	0.316	0.0178192
Glrx5	0.00474509	0.181259	0.911	0.883	0.0178192
Kti12	0.00478867	0.167455	0.526	0.405	0.0179591
Cyb5r3	0.00480049	0.195974	0.757	0.696	0.0179683
Sys1	0.00480378	0.179835	0.834	0.737	0.0179683
Psmc4	0.00481021	0.191699	0.838	0.842	0.0179687
Mat2a	0.00483186	0.19851	0.919	0.879	0.0180258
Rpn2	0.00485162	0.184004	0.826	0.741	0.0180758
Ociad1	0.00486863	0.178323	0.781	0.684	0.0181154
Comt	0.00488997	0.177837	0.615	0.506	0.0181701
Ttyh3	0.00489975	0.16222	0.417	0.316	0.0181701
Hnrnph2	0.00490253	0.174917	0.749	0.64	0.0181701
Ggnbp2	0.00492186	0.182322	0.729	0.66	0.0182169
Rbm39	0.00492801	0.168837	0.996	1	0.0182169
E2f4	0.00496815	0.159398	0.457	0.344	0.0183265
Sbno1	0.00497055	0.181179	0.765	0.753	0.0183265
Hint1	0.00501442	0.160329	0.996	1	0.0184642
Cfl2	0.00502306	0.181527	0.915	0.866	0.0184721
Pkn2	0.0050362	0.180656	0.798	0.729	0.0184761
Denr	0.00503716	0.179172	0.874	0.883	0.0184761
Hnrnph1	0.00506038	0.191738	0.907	0.862	0.0185373
Paics	0.00509778	0.174023	0.968	0.951	0.0186503
Eif3e	0.00511667	0.160407	0.996	0.996	0.0186953
Gfra1	0.00514009	0.212922	0.644	0.522	0.0187567
Serf2	0.00519618	0.157575	0.992	1	0.0189128
Cdc25a	0.00519994	0.189757	0.401	0.239	0.0189128
AU019823	0.00520284	0.16144	0.518	0.368	0.0189128
Ndufc1	0.00532365	0.17554	0.939	0.951	0.0192627
Med21	0.00532412	0.175496	0.713	0.644	0.0192627
Atad2	0.00533385	0.249261	0.352	0.215	0.0192627
Spen	0.0053361	0.177571	0.591	0.429	0.0192627
Timm17b	0.00533757	0.182322	0.696	0.648	0.0192627
Tsnax	0.00534144	0.175094	0.688	0.628	0.0192627
Akr1a1	0.00534661	0.174118	0.992	0.98	0.0192627
Cbfb	0.00537751	0.163573	0.397	0.291	0.0193347
Smndc1	0.00538549	0.168074	0.494	0.381	0.0193347
Hmgb3	0.00538702	0.197706	0.968	0.919	0.0193347
Lars	0.00541246	0.177502	0.721	0.623	0.0193785
Dph6	0.00541287	0.161039	0.486	0.405	0.0193785
Stard3	0.00544816	0.162016	0.583	0.453	0.0194803
Nono	0.00548728	0.175333	0.992	0.984	0.0195955
Prpsap1	0.00551356	0.170869	0.717	0.571	0.0196646
Yipf5	0.00552208	0.164875	0.628	0.502	0.0196703
Tcerg1	0.00554885	0.202524	0.781	0.733	0.0197408
Ssna1	0.00557928	0.172406	0.7	0.583	0.0198231
Safb	0.00558593	0.185167	0.773	0.692	0.0198231
Nr2f6	0.00559841	0.181948	0.927	0.887	0.0198425
Tbcb	0.00563789	0.179259	0.761	0.676	0.0199576
Lsm12	0.00567712	0.184556	0.834	0.83	0.0200294
Spr	0.00567713	0.171472	0.579	0.478	0.0200294
B3gat3	0.00568412	0.16309	0.457	0.336	0.0200294
Atpif1	0.00568641	0.168802	0.996	1	0.0200294
Epop	0.00570501	0.181853	0.425	0.332	0.02007
Chordc1	0.00571866	0.173062	0.623	0.522	0.0200932
Pno1	0.00573483	0.176594	0.377	0.255	0.0201251
Ythdf2	0.00576914	0.176426	0.704	0.567	0.0202205
Hnrnph3	0.00580897	0.191325	0.777	0.741	0.020335
Acp1	0.00582328	0.176931	0.911	0.895	0.02036
Ptprs	0.00587762	0.176187	0.765	0.64	0.0205247
Pcp4	0.00592266	0.357074	0.437	0.267	0.0206566
Ptrh2	0.00598437	0.166127	0.567	0.494	0.0208462
Taf15	0.00599836	0.192838	0.717	0.64	0.0208693
Supt6	0.00608934	0.184356	0.753	0.7	0.0211599
Dazap1	0.00614218	0.179389	0.777	0.773	0.0213174
Gapvd1	0.00618387	0.172316	0.619	0.559	0.0214359
Nme7	0.0061956	0.154151	0.47	0.336	0.0214504
Arhgap17	0.00622269	0.169215	0.368	0.247	0.0215179
Rars	0.0062545	0.177441	0.798	0.733	0.0216016
Ptp4a2	0.00628058	0.193282	0.858	0.814	0.0216653
2410002F23Rik	0.00634143	0.173603	0.688	0.583	0.0218239
Blvrb	0.00634266	0.172954	0.603	0.506	0.0218239
Atrx	0.00634961	0.198352	0.976	0.968	0.0218239
Anapc2	0.00636772	0.162381	0.49	0.36	0.0218597
Kpna3	0.00639974	0.155755	0.47	0.344	0.0219034
Ftsj3	0.00640123	0.17278	0.696	0.615	0.0219034
Kif5b	0.0064036	0.188334	0.951	0.891	0.0219034
Snx2	0.00646636	0.191371	0.741	0.664	0.0220783
Tfg	0.00647066	0.171216	0.709	0.595	0.0220783
Virma	0.00647806	0.161325	0.506	0.389	0.0220783
Psmd8	0.00651492	0.173369	0.955	0.911	0.022142
Carnmt1	0.00651725	0.177557	0.745	0.684	0.022142
Psmd3	0.00652023	0.178438	0.838	0.81	0.022142
Zfp950	0.00652796	0.162903	0.522	0.421	0.022142
Cpsf3	0.00658338	0.171203	0.547	0.441	0.0223034
Nucb1	0.00660192	0.174023	0.688	0.563	0.0223395
Obsl1	0.00665012	0.16508	0.437	0.332	0.0224758
Sf3b3	0.0067025	0.180126	0.903	0.879	0.0226213
Supt16	0.00671493	0.194991	0.923	0.895	0.0226213
Mrps25	0.00671906	0.170626	0.684	0.603	0.0226213
Psmg3	0.00672504	0.158824	0.457	0.372	0.0226213
Thoc1	0.00675908	0.151726	0.49	0.324	0.0226953
Trim27	0.00677383	0.177175	0.745	0.68	0.0226953
Ube2h	0.00677872	0.172534	0.652	0.551	0.0226953
Gcc2	0.00677972	0.168303	0.587	0.494	0.0226953
Borcs8	0.00678701	0.172807	0.607	0.53	0.0226953
Qars	0.00680042	0.171386	0.794	0.704	0.0227134
Tubb2b	0.00681737	0.223923	0.802	0.761	0.0227432
Pom121	0.00683749	0.159849	0.49	0.401	0.0227836
Camk1	0.00685961	0.164504	0.628	0.538	0.0228305
Rala	0.00688238	0.18011	0.822	0.814	0.0228795
Arpc2	0.0069039	0.170313	0.964	0.955	0.0229242
Ankhd1	0.00703386	0.153768	0.534	0.377	0.0233284
Commd9	0.00710192	0.15066	0.526	0.372	0.0235267
Plk2	0.00712496	0.175204	0.389	0.243	0.0235755
Ppt2	0.00718431	0.165016	0.425	0.308	0.0237442
Rtn4	0.00720468	0.172826	0.923	0.915	0.0237838
Srm	0.00721692	0.210895	0.798	0.757	0.0237966
Iscu	0.00725641	0.16446	0.51	0.389	0.023899
Top2b	0.00731942	0.185476	0.919	0.895	0.0240786
Hsd17b10	0.00740717	0.167343	0.964	0.943	0.0243391
Atp5g1	0.00757295	0.172148	0.988	0.984	0.0248432
Dek	0.00757809	0.217896	0.947	0.951	0.0248432
mt-Nd6	0.00759442	-0.131549	0.575	0.664	0.024868
Trir	0.00771103	0.173868	0.972	0.923	0.0252208
Mettl16	0.00772362	0.163585	0.599	0.518	0.0252329
Ireb2	0.00773888	0.154976	0.449	0.328	0.0252537
Msh6	0.00778327	0.169137	0.478	0.332	0.0253693
Alkbh6	0.00781238	0.162519	0.413	0.312	0.0254197
Slc9a5	0.00781869	0.318091	0.283	0.016	0.0254197
Nsmce2	0.00782558	0.168899	0.725	0.599	0.0254197
Taf1d	0.0078349	0.180755	0.98	0.951	0.0254209
Polr2b	0.00785665	0.153043	0.526	0.405	0.0254624
Ppm1g	0.00790269	0.180032	0.822	0.717	0.0255824
Uba1	0.0079122	0.186706	0.717	0.664	0.025584
Sun1	0.00793498	0.15155	0.437	0.287	0.0256285
Ssrp1	0.00797251	0.183834	0.96	0.927	0.0256875
Nectin3	0.00798022	0.160055	0.522	0.405	0.0256875
Blmh	0.00798302	0.17071	0.903	0.798	0.0256875
Sumo3	0.00798946	0.173435	0.87	0.826	0.0256875
Psma6	0.00803783	0.174955	0.947	0.895	0.0258138
Arid1a	0.00805555	0.17743	0.798	0.753	0.0258415
Ggps1	0.00806866	0.156698	0.417	0.283	0.0258543
Ube2j2	0.00817683	0.166037	0.636	0.587	0.0261714
Gigyf2	0.00823313	0.181125	0.555	0.466	0.0263219
Yy1	0.00833437	0.173906	0.854	0.802	0.0266156
Wfdc2	0.0084172	0.318837	0.486	0.401	0.0268499
Grb10	0.00848144	0.190022	0.992	0.98	0.0270245
Hmgcr	0.0085171	0.162056	0.377	0.271	0.0271077
Sdhb	0.00852958	0.17349	0.935	0.854	0.027117
Eif3d	0.00859158	0.171798	0.955	0.935	0.0272835
Med19	0.0086264	0.164839	0.615	0.555	0.0273635
Ift27	0.00869119	0.158224	0.543	0.433	0.0275383
Myh9	0.00871275	0.168419	0.413	0.259	0.0275477
Map1lc3a	0.00871358	0.169845	0.798	0.692	0.0275477
Smdt1	0.00873265	0.176808	0.923	0.899	0.0275773
Mettl23	0.00879003	0.161173	0.656	0.534	0.0277277
Mrpl57	0.00884089	0.171254	0.741	0.66	0.0278572
Mbd2	0.00886726	0.168555	0.692	0.656	0.0278774
Cnot8	0.00886778	0.161843	0.494	0.368	0.0278774
Ctbp1	0.00887679	0.177681	0.846	0.794	0.0278774
Hes6	0.00889614	0.180985	0.676	0.603	0.0279073
Trp53bp2	0.00893493	0.169268	0.413	0.312	0.0279781
Hsbp1	0.00894207	0.173085	0.927	0.883	0.0279781
Eftud2	0.00894826	0.16591	0.688	0.526	0.0279781
Cnot4	0.00905514	0.155257	0.518	0.413	0.0282811
Smco4	0.00908101	0.171343	0.7	0.619	0.0283307
Map1lc3b	0.00910159	0.169993	0.964	0.895	0.0283489
Tcf3	0.0091097	0.174295	0.846	0.798	0.0283489
Fis1	0.00912384	0.171172	0.915	0.939	0.0283489
Sncaip	0.00912678	0.177021	0.721	0.713	0.0283489
Golga7	0.0091555	0.170295	0.628	0.555	0.0284071
Rer1	0.00921589	0.16904	0.822	0.765	0.0285632
Srsf11	0.00924222	0.18812	0.968	0.968	0.0285978
Mrps7	0.00925014	0.169636	0.806	0.757	0.0285978
Stk19	0.00925728	0.160343	0.385	0.251	0.0285978
Babam2	0.00926799	0.154151	0.514	0.417	0.0285998
Ranbp1	0.0092841	0.194004	0.972	0.951	0.0286184
Raph1	0.00929743	0.163745	0.393	0.243	0.0286284
Hdgf	0.00935093	0.183907	0.988	0.988	0.028762
Lamp1	0.00936431	0.168372	0.903	0.874	0.028772
Alyref	0.00939736	0.187871	0.789	0.721	0.0288298
Rfc2	0.00940753	0.189311	0.688	0.587	0.0288298
Wtap	0.00942256	0.16508	0.628	0.462	0.0288298
Supt20	0.00943025	0.163966	0.615	0.551	0.0288298
Gnb1	0.00944047	0.202941	0.838	0.773	0.0288298
Atox1	0.00944406	0.17158	0.919	0.842	0.0288298
Arid4b	0.00945969	0.19062	0.895	0.874	0.0288465
Mapk1ip1l	0.009479	0.160517	0.595	0.494	0.0288743
Ppil2	0.00949597	0.165961	0.753	0.632	0.028895
Ifitm2	0.00958137	0.173654	0.984	0.972	0.0291237
Nr2f2	0.0096615	0.199325	0.992	0.976	0.0293178
Cdk13	0.00966589	0.156881	0.575	0.47	0.0293178
Rbm10	0.00970765	0.154865	0.575	0.449	0.029413
Mcm4	0.00973671	0.172764	0.514	0.393	0.0294696
Wdr26	0.00975271	0.168059	0.822	0.733	0.0294866
Dnpep	0.00979218	0.166737	0.68	0.591	0.0295745
Cwc15	0.00981347	0.169571	0.915	0.866	0.0295998
Ubqln2	0.00982631	0.156921	0.575	0.466	0.0295998
Rae1	0.00983184	0.171761	0.789	0.692	0.0295998
Gnaq	0.00989991	0.162625	0.668	0.583	0.0297731
Mapre1	0.00997086	0.173454	0.822	0.745	0.0299548
Psma5	0.010015	0.159556	0.98	0.984	0.0300298
Fabp5	0.010017	0.248235	0.915	0.939	0.0300298
Cog8	0.0100473	0.155564	0.543	0.502	0.0300685
Sdf4	0.0100511	0.16473	0.68	0.619	0.0300685
Hsph1	0.0100952	0.169137	0.466	0.344	0.0301454
Psmd4	0.010098	0.172489	0.947	0.915	0.0301454
Aen	0.0101572	0.154991	0.417	0.296	0.0302688
Usp16	0.0101647	0.151916	0.526	0.413	0.0302688
Fam192a	0.0101713	0.16347	0.676	0.571	0.0302688
Ndufs3	0.0102224	0.170024	0.887	0.879	0.0303889
Cdc37	0.0102467	0.158614	0.992	0.98	0.0304293
Klhdc4	0.0102661	0.148216	0.421	0.308	0.030455
Triap1	0.0102914	0.147636	0.482	0.372	0.0304982
Itpa	0.0103247	0.161319	0.599	0.466	0.030565
Hnrnpl	0.0103455	0.173953	0.866	0.794	0.0305731
Ergic3	0.010349	0.166573	0.87	0.879	0.0305731
Skp2	0.0103879	0.160565	0.393	0.271	0.0306562
Mlf2	0.0104107	0.181266	0.903	0.862	0.0306759
Ddb1	0.0104162	0.179116	0.879	0.814	0.0306759
Hat1	0.0104939	0.16562	0.68	0.575	0.0308537
Ormdl2	0.0104983	0.153399	0.514	0.429	0.0308537
Cdc27	0.0105533	0.16093	0.364	0.231	0.0309832
Imp3	0.010578	0.167206	0.96	0.899	0.0310236
Sh3glb2	0.0106656	0.157807	0.413	0.32	0.0312483
Mmp11	0.0106883	0.154601	0.401	0.227	0.0312646
Rps19bp1	0.0106932	0.164492	0.68	0.611	0.0312646
Ethe1	0.010718	0.168335	0.34	0.19	0.0312805
Timeless	0.0107207	0.188334	0.332	0.202	0.0312805
Map1b	0.0108152	0.262364	0.583	0.514	0.0315241
Zeb2	0.0109357	-0.134092	0.437	0.534	0.0318426
Pcbd2	0.0109523	0.170383	0.36	0.255	0.0318581
A430005L14Rik	0.0109691	0.158162	0.526	0.425	0.0318616
Auts2	0.0109759	0.178192	0.947	0.927	0.0318616
Timp2	0.0110286	0.17622	0.834	0.769	0.0319817
Cope	0.0110653	0.181502	0.907	0.854	0.0320554
Ndufa11	0.0111503	0.173603	0.935	0.927	0.0322687
Pdrg1	0.0112009	0.156405	0.644	0.563	0.0323576
Prdx4	0.0112038	0.177169	0.806	0.757	0.0323576
Prdx5	0.0112592	0.184265	0.927	0.903	0.0324847
Fzd4	0.0113063	0.153334	0.437	0.32	0.0325873
Rex1bd	0.0113436	0.171569	0.753	0.704	0.0326618
Psmf1	0.0114202	0.161544	0.356	0.227	0.0328489
Slc25a17	0.0114635	0.159774	0.648	0.579	0.0329403
Nsd3	0.0114827	0.165667	0.591	0.555	0.0329619
Stt3a	0.0115073	0.152192	0.462	0.36	0.0329992
Rpl7a	0.0115593	0.127858	1	1	0.0330838
Cisd1	0.0115601	0.166528	0.794	0.741	0.0330838
Sesn3	0.0116016	0.163505	0.636	0.53	0.0331691
Gars	0.0116481	0.160186	0.692	0.567	0.0332531
Hspd1	0.0116544	0.173573	0.996	1	0.0332531
Arl2bp	0.011667	0.166907	0.733	0.652	0.0332555
Ywhae	0.0116789	0.162732	1	0.996	0.0332561
1700025G04Rik	0.0117757	0.145954	0.457	0.328	0.0334982
Ccdc58	0.011822	0.159129	0.636	0.575	0.03357
Rtraf	0.0118295	0.158789	0.976	0.996	0.03357
Stx18	0.0118475	0.152016	0.405	0.308	0.03357
Ankrd10	0.0118482	0.168161	0.664	0.563	0.03357
Nynrin	0.0119068	0.149377	0.449	0.308	0.0337023
Cops9	0.0119246	0.173787	0.862	0.826	0.033719
Mapk12	0.0119654	0.161544	0.356	0.227	0.0338007
Atic	0.0120156	0.16325	0.745	0.64	0.0339081
Mat2b	0.0120273	0.162411	0.644	0.563	0.0339081
Mrpl20	0.0120757	0.170652	0.879	0.858	0.0340034
Uhrf1	0.012085	0.198211	0.348	0.267	0.0340034
Trmt1l	0.0121097	0.15461	0.352	0.231	0.0340391
Zranb2	0.0121588	0.161891	0.931	0.903	0.0341431
Ciz1	0.0121745	0.14581	0.449	0.304	0.0341537
Sin3a	0.0122056	0.146468	0.421	0.312	0.0342069
Sulf2	0.0123005	0.176789	0.749	0.66	0.0344391
Pes1	0.012375	0.149676	0.547	0.393	0.0346133
Armc1	0.0123915	0.161868	0.684	0.579	0.0346255
Hspa13	0.0124634	0.157629	0.393	0.259	0.0347921
Fam133b	0.0124903	0.168024	0.818	0.745	0.0348329
Mbd3	0.0125431	0.178567	0.939	0.927	0.034946
Anp32a	0.0126164	0.176552	1	0.992	0.0351157
Snx24	0.0126905	0.15924	0.409	0.291	0.0352735
Clk1	0.012698	0.174813	0.943	0.899	0.0352735
Abhd8	0.0127834	0.156611	0.429	0.316	0.0354762
Myef2	0.0128298	0.169309	0.648	0.563	0.0355702
Slc35a4	0.0128487	0.145333	0.474	0.344	0.0355877
Zfp638	0.0128648	0.174803	0.802	0.745	0.0355976
Dhfr	0.0128826	0.200111	0.328	0.243	0.0356121
Hmcn1	0.0130415	0.207639	0.879	0.81	0.0360163
Ctnnb1	0.0130593	0.167735	0.976	0.972	0.0360303
Ubtd1	0.0130942	0.167944	0.599	0.49	0.0360917
Col4a1	0.0131248	0.176496	0.883	0.794	0.0361408
Dync1li1	0.0131456	0.14813	0.441	0.36	0.0361631
Taf3	0.0132033	0.149296	0.453	0.336	0.0362537
B230118H07Rik	0.0132041	0.151018	0.595	0.462	0.0362537
Cfap36	0.0132563	0.159914	0.704	0.656	0.0363619
Napa	0.0132846	0.162961	0.781	0.729	0.0364043
Kmt2a	0.0133818	0.17185	0.68	0.623	0.0365913
Yae1d1	0.0133885	0.160343	0.668	0.595	0.0365913
Hikeshi	0.0133933	0.167763	0.733	0.66	0.0365913
U2af1	0.0134047	0.166384	0.976	0.951	0.0365913
Noc4l	0.0134172	0.147695	0.425	0.279	0.0365913
Foxd1	0.0134341	0.193621	0.551	0.449	0.0365981
Dcn	0.0134455	0.170626	0.328	0.178	0.0365981
Eif3i	0.013517	0.157471	0.992	0.996	0.0367344
Crym	0.0135288	0.208372	0.943	0.947	0.0367344
Urod	0.0135344	0.156842	0.684	0.64	0.0367344
Nrp2	0.0135722	-0.133117	0.182	0.296	0.0368017
Tspan13	0.0135873	0.154549	0.453	0.332	0.0368076
Eif4ebp2	0.013633	0.164858	0.676	0.611	0.0368963
Srsf4	0.013656	0.15869	0.668	0.575	0.0369231
Emc4	0.0138368	0.160958	0.656	0.599	0.037356
Mfap2	0.0138525	0.172542	0.834	0.773	0.037356
Ppp2r1a	0.0138556	0.161641	0.737	0.632	0.037356
Mrps9	0.0141051	0.162612	0.757	0.636	0.0379927
Fam49b	0.0141807	0.153178	0.619	0.526	0.0381603
Nup188	0.0142095	0.170626	0.336	0.198	0.0382014
Dpp3	0.014241	0.148327	0.506	0.372	0.0382501
Abhd11	0.0142894	0.150152	0.453	0.352	0.0383219
Psmd11	0.0142948	0.163905	0.87	0.834	0.0383219
Ap1g1	0.0143156	0.147158	0.397	0.267	0.0383415
Ddx10	0.0143445	0.155712	0.64	0.555	0.0383828
Sf3b6	0.0143933	0.166313	0.951	0.899	0.0384608
Taok1	0.0144008	0.164365	0.656	0.591	0.0384608
Wipi2	0.0144505	0.146982	0.502	0.381	0.0385404
Ubl5	0.0144578	0.164509	0.955	0.923	0.0385404
Ctsa	0.0144811	0.151666	0.551	0.449	0.0385663
Ranbp9	0.0145984	0.143947	0.555	0.429	0.0388423
Cops4	0.0146338	0.165418	0.891	0.83	0.0389001
Clptm1	0.0146766	0.154555	0.466	0.324	0.0389773
Atp5f1	0.0147426	0.151075	0.992	0.992	0.0391161
mt-Nd4l	0.0147589	0.137306	0.996	0.992	0.0391228
Dbi	0.0148255	0.181279	0.862	0.822	0.0392626
Ormdl3	0.0149194	0.143455	0.514	0.405	0.0394746
Exosc2	0.0150195	0.163406	0.389	0.308	0.039653
Trappc5	0.0150211	0.153464	0.575	0.466	0.039653
Brwd1	0.0150287	0.151139	0.482	0.417	0.039653
Lsm3	0.0150472	0.162936	0.806	0.729	0.0396647
Mcrs1	0.0151517	0.158658	0.721	0.676	0.0399031
Chd4	0.0151765	0.177896	0.972	0.98	0.0399314
Ext2	0.0152981	0.147053	0.563	0.482	0.0401713
Ube2v2	0.0153129	0.16014	0.749	0.66	0.0401713
Cct7	0.0153221	0.153689	0.992	0.984	0.0401713
Hsp90b1	0.0153242	0.201799	0.968	0.98	0.0401713
Slirp	0.0153572	0.166005	0.765	0.725	0.0402205
Zwint	0.015386	0.159301	0.721	0.623	0.0402589
Myl12a	0.0154686	0.169618	0.911	0.814	0.0404376
Snrpd3	0.0154968	0.162478	0.951	0.947	0.0404742
Sugt1	0.0156147	0.162715	0.895	0.85	0.0407446
Tm9sf4	0.0156763	0.151107	0.567	0.51	0.0408677
Lims1	0.0157598	0.148846	0.543	0.47	0.0410139
Farsa	0.0157868	0.15506	0.709	0.579	0.0410139
Tubb4b	0.0157935	0.202588	0.672	0.591	0.0410139
Cab39	0.0157987	0.143101	0.457	0.372	0.0410139
Akap8	0.0158046	0.161544	0.644	0.547	0.0410139
Tor1aip1	0.0158567	0.146343	0.429	0.372	0.0411115
Tmem120a	0.0158916	0.147695	0.393	0.279	0.041162
Mrpl47	0.0159237	0.14214	0.457	0.316	0.041162
Csnk1a1	0.0159318	0.160343	0.992	0.996	0.041162
Ankrd54	0.0159341	0.143894	0.421	0.312	0.041162
Uqcrc2	0.0159911	0.162167	0.964	0.943	0.0412438
Gstk1	0.0159949	0.206756	0.296	0.126	0.0412438
Naxe	0.0160484	0.167054	0.615	0.567	0.0413383
Pycrl	0.0160606	0.156161	0.704	0.628	0.0413383
Mrpl52	0.0160839	0.157562	0.972	0.968	0.0413606
Eif2a	0.0161169	0.162519	0.874	0.822	0.0413776
Rbm6	0.0161196	0.162519	0.632	0.591	0.0413776
Uba5	0.0163289	0.148598	0.53	0.413	0.0418488
Aimp1	0.0163327	0.15447	0.984	0.976	0.0418488
Ube2z	0.0163742	0.149449	0.413	0.291	0.0419175
Ift52	0.0164299	0.142915	0.478	0.332	0.0420221
Uqcc2	0.0166682	0.163704	0.676	0.611	0.0425933
Clns1a	0.01672	0.164443	0.826	0.798	0.0426872
Ube2d3	0.0168099	0.160408	0.943	0.968	0.0428751
Zfp704	0.0168238	0.177635	0.692	0.567	0.0428751
Ndufb10	0.0169471	0.162921	0.984	0.923	0.043082
Nol11	0.0169516	0.154756	0.636	0.579	0.043082
Hsd11b2	0.0169648	0.194013	0.49	0.413	0.043082
Tet3	0.0169657	0.153492	0.636	0.462	0.043082
Csnk1d	0.0169824	0.156745	0.692	0.587	0.0430859
Tead1	0.0170489	0.152639	0.704	0.547	0.0431803
Efnb1	0.0170501	0.164642	0.587	0.502	0.0431803
Mrps12	0.0170761	0.155293	0.721	0.668	0.0432076
Atxn10	0.0171232	0.163551	0.927	0.919	0.0432883
Cmas	0.0172103	0.150999	0.648	0.555	0.0434119
Rbm15b	0.0172186	0.149296	0.441	0.316	0.0434119
Zfp846	0.0172336	0.208545	0.296	0.101	0.0434119
Pbx1	0.0172404	0.16958	0.907	0.866	0.0434119
Zcchc14	0.0172486	0.15963	0.348	0.211	0.0434119
Ufm1	0.0174148	0.1441	0.555	0.478	0.0437914
Acaa1a	0.017463	0.15355	0.68	0.567	0.0438738
Mrpl9	0.017724	0.148696	0.741	0.603	0.0444903
Uri1	0.0177992	0.157295	0.704	0.615	0.0446394
Timm8b	0.0178766	0.160457	0.943	0.927	0.044794
Zfp467	0.0179085	0.144891	0.47	0.372	0.0448344
Fam216a	0.0181464	0.154756	0.68	0.591	0.0453901
Bicc1	0.0181839	0.146835	0.526	0.421	0.0454437
Tsen34	0.0182285	0.16405	0.862	0.798	0.0455013
Myl12b	0.018239	0.159683	0.818	0.692	0.0455013
Cct2	0.0183532	0.141285	0.992	1	0.045746
Gnl1	0.0184547	0.153842	0.668	0.563	0.0459586
Lpar6	0.0185285	0.146482	0.47	0.393	0.0461021
Morf4l1	0.0187704	0.159722	0.98	0.996	0.0466631
Cdc26	0.0188738	0.158368	0.883	0.814	0.0468786
Cdc42bpa	0.0188902	0.164875	0.368	0.215	0.0468786
Rsbn1l	0.0189758	0.156025	0.745	0.68	0.04705
Zfp706	0.0190331	0.158162	0.923	0.838	0.047138
Eri3	0.0190445	0.15196	0.64	0.547	0.047138
Ing1	0.0190997	0.174429	0.692	0.652	0.0472335
Gsk3a	0.0192219	0.153348	0.437	0.372	0.0474611
Tsr2	0.0192252	0.136512	0.433	0.304	0.0474611
Umps	0.019372	0.15491	0.462	0.368	0.0477821
Dpy30	0.0194927	0.161202	0.826	0.794	0.048021
Jund	0.0195027	0.194627	0.996	1	0.048021
Mageh1	0.0195631	0.154473	0.591	0.526	0.0480279
Lap3	0.0195725	0.157838	0.85	0.806	0.0480279
Igfbp5	0.0195733	0.246279	0.879	0.842	0.0480279
Prkag1	0.0195754	0.140392	0.433	0.316	0.0480279
Gna11	0.0196019	0.158046	0.717	0.704	0.0480279
Rbms1	0.019607	0.161173	0.575	0.49	0.0480279
Wtip	0.0196268	0.152712	0.7	0.64	0.0480349
Tra2a	0.0198162	0.171163	0.992	0.992	0.0483818
B9d1	0.0198214	0.142291	0.619	0.498	0.0483818
Etfa	0.019839	0.146603	0.628	0.571	0.0483818
Col1a1	0.0198496	0.150764	0.401	0.267	0.0483818
Snrpd1	0.0198538	0.166461	0.984	0.972	0.0483818
Lactb	0.0199007	0.172185	0.328	0.223	0.0484546
Smchd1	0.0199421	0.164962	0.729	0.628	0.0484949
AI314180	0.0199514	0.152192	0.603	0.522	0.0484949
Rgs19	0.0200339	0.174353	0.312	0.166	0.0486539
Mtx1	0.0200726	0.151439	0.583	0.478	0.048706
Cd151	0.0201437	0.151308	0.648	0.522	0.0488369
Selenow	0.0202703	0.152647	1	1	0.049102
Txndc15	0.0203567	0.150132	0.628	0.575	0.0492692
Ssu72	0.0204315	0.157409	0.789	0.725	0.049408
Rab1a	0.020578	0.149716	0.623	0.563	0.0496918
Kctd5	0.0205895	0.148312	0.368	0.243	0.0496918
1810058I24Rik	0.0206053	0.159542	0.895	0.862	0.0496918
Suclg2	0.0206189	0.16272	0.846	0.773	0.0496918
Zfp398	0.0207107	0.153274	0.377	0.263	0.0498708
Sf3a2	0.0207722	0.152368	0.526	0.462	0.0499448
Farsb	0.0207766	0.14693	0.575	0.47	0.0499448
Pum1	0.0208827	0.16093	0.915	0.887	0.0501573
Luc7l	0.020918	0.160551	0.704	0.668	0.0501966
Amer1	0.0209344	0.139182	0.506	0.385	0.0501966
Med25	0.020976	0.144914	0.53	0.474	0.0502278
Ruvbl1	0.0209828	0.157676	0.919	0.895	0.0502278
Thoc6	0.0210183	0.139541	0.555	0.429	0.0502705
Nop53	0.0210482	0.158004	0.923	0.931	0.0502995
Etf1	0.0210685	0.153871	0.68	0.571	0.0503058
Prelid3b	0.0212873	0.145262	0.393	0.291	0.0507855
Tacc2	0.0213567	0.14581	0.421	0.287	0.0509082
Nfkbib	0.0213971	0.152839	0.397	0.251	0.0509617
Acadl	0.0215222	0.14531	0.571	0.494	0.0512167
Commd3	0.0216896	0.158941	0.874	0.794	0.0515717
Phf14	0.0217607	0.158406	0.883	0.854	0.0516856
Gnpat	0.0217738	0.138519	0.453	0.332	0.0516856
Snrpe	0.0217944	0.152307	0.992	0.992	0.0516912
Sf3a1	0.0218592	0.148653	0.607	0.547	0.0517694
Tnfaip8	0.0218721	-0.105999	0.227	0.324	0.0517694
Nubp2	0.0218987	0.155072	0.36	0.206	0.0517694
Hoxa9	0.0219132	0.172266	0.753	0.761	0.0517694
Rab5a	0.0219186	0.141746	0.526	0.437	0.0517694
Hnrnpf	0.0221209	0.146029	1	0.996	0.0522038
Ik	0.0222702	0.159151	0.81	0.814	0.0525125
Asxl1	0.0223449	0.135979	0.441	0.352	0.0526332
Ndufb9	0.0223584	0.150267	1	0.968	0.0526332
Mtfr1l	0.0223824	0.145899	0.652	0.555	0.0526451
Fopnl	0.0224006	0.143101	0.538	0.437	0.0526451
Exosc10	0.0224764	0.138683	0.457	0.36	0.0527796
Cdh11	0.0225809	0.161877	0.907	0.846	0.0529535
Arfgap2	0.0226035	0.145673	0.664	0.53	0.0529535
Raf1	0.0226204	0.141203	0.615	0.498	0.0529535
Mut	0.0226251	0.133168	0.445	0.316	0.0529535
Magt1	0.0226681	0.145954	0.579	0.494	0.0529787
Ddx24	0.022687	0.157004	0.899	0.862	0.0529787
Prpf38b	0.0226918	0.177206	0.81	0.785	0.0529787
Cebpb	0.0227533	-0.103353	0.259	0.381	0.0530786
Zdhhc3	0.0228047	0.138784	0.425	0.348	0.0531302
Lsm6	0.0228148	0.163778	0.802	0.757	0.0531302
Immp1l	0.0228316	0.149965	0.704	0.664	0.0531302
Emilin1	0.0229321	0.156004	0.344	0.206	0.0533056
Plekhj1	0.0229564	0.153352	0.757	0.688	0.0533056
Smim4	0.0229811	0.150971	0.745	0.664	0.0533056
0610037L13Rik	0.022982	0.139529	0.474	0.405	0.0533056
Cpe	0.0230579	0.151466	0.453	0.372	0.0533959
Cfap20	0.0230586	0.153343	0.713	0.652	0.0533959
Cog4	0.0230876	0.133876	0.462	0.393	0.0534194
Mbtps1	0.0231774	0.144581	0.656	0.567	0.0535837
Fbxw8	0.0232394	0.151346	0.348	0.211	0.0536832
Pold3	0.0234131	0.135341	0.437	0.32	0.0540405
Bckdha	0.0234951	0.148569	0.632	0.547	0.0541666
Lamc1	0.0235059	0.138493	0.478	0.393	0.0541666
Rabggtb	0.0236011	0.147842	0.664	0.595	0.0542737
Commd2	0.0236077	0.139113	0.563	0.466	0.0542737
Mrps34	0.0236097	0.156899	0.749	0.696	0.0542737
Thop1	0.0237109	0.154713	0.688	0.636	0.0544622
Pih1d1	0.0237403	0.14729	0.514	0.449	0.0544856
Mrpl14	0.0237764	0.158299	0.858	0.798	0.0545244
Xpo7	0.0238179	0.139762	0.498	0.417	0.0545754
Hsd17b12	0.0238431	0.164622	0.644	0.563	0.0545763
Bola3	0.0238567	0.137069	0.522	0.417	0.0545763
Nxt1	0.0239308	0.143269	0.502	0.466	0.0547016
Amdhd2	0.0239782	0.145875	0.352	0.227	0.054766
Bmpr2	0.0240134	0.142442	0.538	0.47	0.0548024
Msrb1	0.0241337	0.137134	0.502	0.409	0.0550326
Rpl11	0.0242147	0.113173	1	1	0.0551731
Topbp1	0.0243339	0.146835	0.482	0.389	0.0554001
Sec13	0.0243906	0.149716	0.623	0.534	0.0554534
Prpf31	0.0243964	0.163955	0.68	0.66	0.0554534
Apoo	0.0245573	0.137471	0.478	0.385	0.0557745
Fem1b	0.0246056	0.133531	0.453	0.36	0.0558338
Ahcy	0.0246298	0.166024	0.332	0.166	0.0558338
Arl16	0.0246825	0.147325	0.34	0.255	0.0558338
Stoml2	0.0246912	0.156037	0.854	0.785	0.0558338
Pin4	0.0247022	0.150935	0.733	0.632	0.0558338
Pdxp	0.0247029	0.134634	0.429	0.291	0.0558338
Tcf12	0.0247211	0.156091	0.68	0.66	0.0558338
Bex3	0.0247774	0.156579	0.98	0.972	0.0558725
Pin1	0.0247776	0.157212	0.854	0.781	0.0558725
Rtca	0.0248433	0.136988	0.466	0.348	0.0559762
Pafah1b1	0.0248721	0.157949	0.935	0.919	0.0559967
Mettl9	0.0249245	0.153599	0.923	0.838	0.0560703
Pspc1	0.0251147	0.141275	0.53	0.429	0.056452
Hpf1	0.025134	0.154151	0.684	0.648	0.056452
Snd1	0.0251957	0.14234	0.607	0.526	0.0565018
Eif1ax	0.025196	0.161126	0.903	0.903	0.0565018
Ppp6r3	0.0253089	0.135932	0.457	0.344	0.0567104
Cdc37l1	0.0253927	0.135238	0.466	0.385	0.0568532
Pfdn2	0.0254472	0.151626	0.964	0.927	0.0569303
Rpl13a	0.0255459	0.131346	0.996	1	0.0571061
Rcc1	0.0256367	0.182322	0.283	0.142	0.0572641
Cryzl1	0.0256991	0.137586	0.571	0.437	0.0573583
Acin1	0.0257381	0.169501	0.955	0.939	0.0573842
Tpp2	0.0257511	0.139762	0.547	0.482	0.0573842
2310011J03Rik	0.0258857	0.136576	0.466	0.409	0.057605
Eif4ebp1	0.0258908	0.159276	0.858	0.777	0.057605
Tpm1	0.0262033	0.184806	0.806	0.761	0.0582008
Picalm	0.026204	0.13942	0.51	0.393	0.0582008
Mrps26	0.026232	0.153685	0.822	0.753	0.0582008
Bud23	0.0262406	0.142005	0.587	0.518	0.0582008
Las1l	0.0262888	0.146507	0.648	0.603	0.0582566
Sf3a3	0.026311	0.157629	0.789	0.717	0.0582566
Csnk1g2	0.0263273	0.157442	0.891	0.858	0.0582566
Ttc32	0.0263571	0.147325	0.34	0.227	0.05826
Lias	0.0263699	0.135036	0.623	0.478	0.05826
Eef1g	0.0264607	0.127974	1	1	0.058396
Gadd45gip1	0.0264726	0.153911	0.785	0.721	0.058396
Msl1	0.0265461	0.149234	0.66	0.595	0.0585128
Nars	0.0266243	0.153944	0.887	0.789	0.0585962
Snx17	0.0266436	0.15096	0.789	0.725	0.0585962
Ube2q1	0.0266459	0.145004	0.644	0.559	0.0585962
Serf1	0.0267115	0.151986	0.955	0.935	0.058683
Fasn	0.0267267	0.145987	0.453	0.364	0.058683
Med16	0.0267705	0.13815	0.498	0.413	0.0587252
Nol7	0.0267873	0.165955	0.842	0.806	0.0587252
Polr2h	0.0268835	0.155622	0.777	0.704	0.0588571
Fam213a	0.0268889	0.171358	0.955	0.927	0.0588571
Naxd	0.0271522	0.151022	0.684	0.636	0.0593422
Ddx3x	0.0271523	0.156547	0.806	0.765	0.0593422
Nudcd2	0.0272101	0.1725	0.794	0.789	0.0594227
Gmps	0.0273915	0.157761	0.826	0.737	0.059633
Csnk2a2	0.0274212	0.151198	0.761	0.676	0.059633
Egfl7	0.0274233	0.130678	0.474	0.336	0.059633
Pbrm1	0.0274387	0.177206	0.903	0.883	0.059633
Unc119	0.027457	0.147453	0.777	0.668	0.059633
Vezf1	0.0274599	0.157861	0.709	0.676	0.059633
Scd2	0.02746	0.176609	0.802	0.757	0.059633
Stx6	0.0274745	0.134235	0.449	0.36	0.059633
Pak1ip1	0.0275078	0.150075	0.769	0.696	0.0596597
Trmt6	0.0276312	0.141759	0.417	0.316	0.0598404
Med4	0.0276597	0.143101	0.672	0.551	0.0598404
Ccser2	0.0276627	0.158778	0.328	0.194	0.0598404
Cox20	0.0276944	0.144463	0.741	0.587	0.0598404
Phf23	0.0276965	0.145182	0.543	0.482	0.0598404
Surf1	0.0278072	0.131502	0.494	0.385	0.0599915
Akt1	0.0278225	0.160413	0.68	0.64	0.0599915
Copb2	0.0278298	0.152371	0.879	0.842	0.0599915
Ppip5k2	0.0279328	0.130265	0.421	0.332	0.0601679
Mest	0.028057	0.200388	0.992	0.992	0.0603895
Tarbp2	0.0280897	0.143529	0.348	0.223	0.0604141
Rab2a	0.0282572	0.153816	0.927	0.903	0.0607283
Ppp1cb	0.0283716	0.14817	0.765	0.692	0.0609107
Srp9	0.028385	0.160092	0.923	0.919	0.0609107
Ccnl2	0.02843	0.149676	0.777	0.749	0.0609614
Gpaa1	0.0285442	0.132806	0.413	0.336	0.06116
Mmp14	0.0285718	0.15104	0.644	0.559	0.061173
Chchd4	0.0288351	0.147417	0.607	0.534	0.0616903
Mesd	0.0289563	0.143358	0.729	0.648	0.0619028
Ninj1	0.0289828	0.146328	0.364	0.279	0.0619087
Ttc1	0.0290252	0.139552	0.579	0.474	0.0619087
Dnm2	0.0290452	0.168384	0.32	0.138	0.0619087
Tuba1b	0.0290463	0.184637	0.98	0.976	0.0619087
Wdr12	0.0292482	0.153051	0.704	0.607	0.0622923
Rpn1	0.0293729	0.148825	0.7	0.632	0.0625111
Qser1	0.0294704	0.138231	0.518	0.449	0.0626714
Dnajc11	0.0297009	0.135175	0.478	0.393	0.0631144
Ssbp1	0.0298793	0.157106	0.919	0.887	0.063415
Gtf3a	0.029887	0.149481	0.769	0.68	0.063415
Rbm18	0.0299207	0.133224	0.615	0.506	0.063439
Ntmt1	0.0299438	0.146968	0.68	0.632	0.0634407
Nfkbil1	0.0300042	0.135761	0.522	0.421	0.0635211
Polr2i	0.03007	0.152485	0.777	0.721	0.063613
Plat	0.0301025	0.14842	0.575	0.506	0.0636343
Mecp2	0.0302749	0.140582	0.466	0.377	0.0639513
Lin7c	0.0303674	0.132582	0.538	0.482	0.0640988
Ndufaf8	0.0303924	0.14425	0.664	0.599	0.064104
Desi1	0.030447	0.133531	0.36	0.304	0.0641611
Brms1	0.0304675	0.133531	0.389	0.267	0.0641611
Nktr	0.0304873	0.170362	0.87	0.822	0.0641611
Dnajc2	0.0306402	0.155576	0.874	0.822	0.0644202
Gnai3	0.0306558	0.148482	0.733	0.725	0.0644202
Mdm2	0.0307214	0.129858	0.51	0.401	0.0645105
Got1	0.0308164	0.14234	0.611	0.514	0.064662
Dnajb2	0.0309742	0.130496	0.385	0.275	0.0649452
Dpm2	0.031008	0.133531	0.506	0.393	0.064968
Rab34	0.0311312	0.14652	0.741	0.676	0.065178
Bcl7b	0.0312156	0.132089	0.433	0.316	0.0653066
Bdp1	0.0312522	0.140331	0.611	0.547	0.065335
Micu1	0.031348	0.12582	0.453	0.348	0.065487
Gm8186	0.0314733	0.148145	0.664	0.575	0.0657005
Mrpl22	0.0315017	0.138295	0.648	0.551	0.0657115
Slc9a3r2	0.0315455	0.134296	0.377	0.283	0.0657545
Rad23b	0.0316929	0.149269	0.729	0.668	0.0660133
1110004E09Rik	0.031729	0.140386	0.583	0.478	0.06604
Ptpra	0.0317867	0.14686	0.745	0.611	0.0660647
Tcof1	0.0317874	0.14842	0.696	0.644	0.0660647
Xpo6	0.0319932	0.139892	0.397	0.255	0.0663716
Tbc1d20	0.032004	0.135459	0.352	0.271	0.0663716
Ctps	0.0320052	0.135089	0.555	0.441	0.0663716
Wbp1	0.0322793	0.147597	0.688	0.619	0.066887
Becn1	0.0323079	0.139238	0.555	0.478	0.066887
Atf4	0.0323244	0.16219	0.883	0.83	0.066887
Bclaf1	0.0323702	0.155318	0.951	0.919	0.0668996
Limd1	0.0324103	0.138421	0.425	0.352	0.0668996
Ndufaf6	0.0324108	0.143707	0.377	0.279	0.0668996
Pfdn1	0.0324314	0.150389	0.943	0.911	0.0668996
Pdap1	0.0324483	0.150233	0.988	1	0.0668996
Chrac1	0.0325135	0.14817	0.733	0.721	0.0669854
Il17rd	0.0325512	0.146369	0.474	0.417	0.0669924
Ndufab1	0.0325899	0.150935	0.964	0.964	0.0669924
Cers2	0.0325943	0.138432	0.644	0.551	0.0669924
1700123O20Rik	0.0326142	0.140059	0.623	0.526	0.0669924
Riok2	0.0326349	0.136312	0.559	0.47	0.0669924
Epcam	0.0328384	0.207837	0.279	0.17	0.0673615
Ubl3	0.0328861	0.145249	0.53	0.421	0.0674105
Tmem115	0.0329167	0.13206	0.417	0.32	0.0674247
Thap4	0.0329743	0.135802	0.372	0.3	0.0674938
Rcor1	0.0330906	0.136683	0.494	0.437	0.0676832
Dnph1	0.03328	0.136759	0.417	0.32	0.0680185
Gm2a	0.0333025	0.132821	0.417	0.316	0.0680185
Gyg	0.0334488	0.139485	0.356	0.239	0.0682683
Mcat	0.0335497	0.128198	0.413	0.263	0.0684234
Mcmbp	0.033573	0.135238	0.437	0.377	0.0684234
Nmral1	0.0337622	0.148653	0.563	0.534	0.0687597
Bbip1	0.0338535	0.135116	0.514	0.417	0.0688961
Ube2f	0.0339601	0.131028	0.417	0.332	0.0690534
Abl1	0.0339794	0.138646	0.514	0.425	0.0690534
Cdc123	0.0341356	0.152507	0.696	0.648	0.0693211
Naa16	0.0342785	0.146875	0.393	0.255	0.0695001
Snf8	0.0342863	0.144581	0.684	0.607	0.0695001
Qtrt1	0.0342971	0.134753	0.575	0.425	0.0695001
Pigt	0.0343748	0.146806	0.603	0.526	0.0696078
Dtl	0.0347607	0.19671	0.409	0.287	0.0702907
Zc3h13	0.0347616	0.162183	0.842	0.83	0.0702907
Fkbp9	0.0348156	0.127074	0.486	0.381	0.0702938
Pdia4	0.0348222	0.147242	0.668	0.628	0.0702938
Actn4	0.0348473	0.149478	0.717	0.623	0.0702938
Rps27l	0.0348699	0.145058	0.98	0.98	0.0702938
Acot1	0.0348947	0.15461	0.931	0.911	0.0702938
Kras	0.0349174	0.143673	0.628	0.538	0.0702938
Scrn2	0.0349364	0.136759	0.409	0.316	0.0702938
Nf1	0.035058	0.127371	0.437	0.316	0.0703795
Dcaf11	0.0350645	0.135036	0.368	0.271	0.0703795
Abcd3	0.0350682	0.126563	0.534	0.405	0.0703795
Crcp	0.035083	0.143319	0.34	0.219	0.0703795
Tlk1	0.0351377	0.15207	0.615	0.575	0.0703795
Mrpl41	0.0351467	0.135483	0.648	0.53	0.0703795
Wwc2	0.0351723	0.151335	0.68	0.623	0.0703795
Mettl6	0.0351774	0.139379	0.385	0.32	0.0703795
Ccnd1	0.0352761	0.193082	0.563	0.453	0.0703987
Twistnb	0.0352765	0.148359	0.781	0.717	0.0703987
Grwd1	0.0352928	0.131374	0.551	0.47	0.0703987
Scamp3	0.0353099	0.13708	0.571	0.494	0.0703987
Orc2	0.035311	0.130265	0.409	0.308	0.0703987
Chchd2	0.0353981	0.129481	1	1	0.0705123
Ccdc9	0.0354264	0.132821	0.417	0.332	0.0705123
Nol12	0.0354523	0.141728	0.688	0.603	0.0705123
Chmp1a	0.0354813	0.13154	0.474	0.401	0.0705123
Fiz1	0.0354921	0.133224	0.543	0.478	0.0705123
Wbp2	0.0355522	0.131734	0.413	0.332	0.0705823
Pdzd11	0.0355906	0.135175	0.478	0.409	0.0705924
Rrp15	0.0356254	0.144303	0.761	0.713	0.0705924
Xpnpep1	0.0356319	0.13674	0.474	0.417	0.0705924
Rsf1	0.0356579	0.170273	0.814	0.737	0.0705948
Cdc34	0.035768	0.13623	0.466	0.377	0.0707634
Sec11a	0.035973	0.148173	0.923	0.911	0.0710939
Exosc9	0.0359954	0.127945	0.462	0.372	0.0710939
Zmynd11	0.0360102	0.151585	0.575	0.53	0.0710939
Dot1l	0.0360483	0.135754	0.405	0.255	0.0711197
Cox7a2	0.0361271	0.143978	0.996	0.98	0.0712255
Cdkn1c	0.0363142	0.212448	0.935	0.931	0.0715447
Ier3ip1	0.0364093	0.144513	0.761	0.713	0.0716823
Pet100	0.0365847	0.138683	0.652	0.579	0.0719777
Qdpr	0.0366399	0.143351	0.733	0.628	0.0720137
Ahsa1	0.0366537	0.152534	0.781	0.709	0.0720137
Plcg1	0.0367175	0.126683	0.429	0.332	0.0720891
Syf2	0.0367528	0.144224	0.789	0.741	0.0721086
Rnf126	0.036883	0.1425	0.583	0.543	0.0723142
Rnf216	0.0369314	0.145535	0.506	0.368	0.072359
Syne4	0.0369809	0.14501	0.34	0.223	0.0724061
Wdr55	0.0370321	0.129837	0.372	0.308	0.0724563
Sntb2	0.0370818	0.135997	0.543	0.453	0.0725036
Mrpl4	0.0371592	0.141437	0.623	0.547	0.0725682
Sltm	0.0371659	0.155744	0.895	0.85	0.0725682
Zmat2	0.0373813	0.15583	0.87	0.846	0.0729025
Rem1	0.0373886	0.177421	0.806	0.773	0.0729025
Cpsf6	0.0375337	0.158117	0.822	0.802	0.073128
Nolc1	0.0375722	0.183687	0.725	0.713	0.073128
Col4a2	0.03759	0.145658	0.777	0.692	0.073128
Gle1	0.0376072	0.128519	0.429	0.348	0.073128
Syncrip	0.0376578	0.17477	0.87	0.862	0.0731363
Hmgcs1	0.037663	0.126542	0.397	0.3	0.0731363
Bphl	0.0377574	0.136175	0.571	0.478	0.0732665
Spcs1	0.0377817	0.151694	0.883	0.866	0.0732665
Sap18	0.0380771	0.14825	0.826	0.753	0.0737891
Txndc17	0.0381636	0.147111	0.919	0.927	0.0739062
Phgdh	0.0382173	0.186373	0.988	0.996	0.0739597
Eif3g	0.0382984	0.148878	0.947	0.939	0.0740662
Ncl	0.0383644	0.158249	1	1	0.0741434
Rcc2	0.0384304	0.158482	0.883	0.802	0.0742204
Pole3	0.0385026	0.143616	0.7	0.648	0.0742615
Rad23a	0.038504	0.131576	0.381	0.243	0.0742615
Tmem183a	0.0385314	0.128617	0.462	0.36	0.0742638
Shisa2	0.0386089	0.141079	0.615	0.575	0.0743627
Uqcrb	0.0388414	0.14774	0.984	0.96	0.0747598
Prkra	0.0389703	0.141861	0.765	0.664	0.0749195
Zfp703	0.0389771	0.124665	0.441	0.296	0.0749195
Mum1	0.0390594	0.142952	0.599	0.51	0.0749429
Tspan7	0.0390637	0.15329	0.336	0.279	0.0749429
Utp3	0.0390899	0.152035	0.834	0.826	0.0749429
Rrbp1	0.0390949	0.155171	0.899	0.85	0.0749429
Eif6	0.0391611	0.147363	0.874	0.81	0.0750191
Mark3	0.0392892	0.147709	0.696	0.66	0.0751783
Ttc14	0.0392971	0.155282	0.789	0.773	0.0751783
Kat6a	0.039379	0.129936	0.571	0.457	0.0752842
H2afx	0.0395101	0.200329	0.684	0.64	0.0754839
Dpf2	0.0396255	0.144672	0.543	0.49	0.075622
Ift20	0.0396356	0.147549	0.846	0.802	0.075622
Ncaph2	0.039798	0.130184	0.474	0.397	0.0758097
Memo1	0.0398011	0.127952	0.405	0.296	0.0758097
Iah1	0.0398359	0.137201	0.591	0.522	0.0758097
Dkc1	0.0398408	0.153464	0.883	0.838	0.0758097
Rpl7l1	0.039988	0.149836	0.87	0.826	0.0760388
Sirt1	0.0400196	0.130127	0.381	0.259	0.0760479
Tmem216	0.0401079	0.129678	0.397	0.267	0.0761649
Mmgt2	0.0401883	0.146498	0.559	0.502	0.0761759
Rbx1	0.0401985	0.150266	0.964	0.98	0.0761759
Cks2	0.0402118	0.149676	0.53	0.377	0.0761759
Hnrnpa0	0.0402211	0.148049	1	1	0.0761759
Pcyt2	0.0403698	0.167054	0.296	0.146	0.0763907
Nr2c2	0.0403883	0.12582	0.429	0.352	0.0763907
Hoxb8	0.0404465	0.173272	0.684	0.611	0.0764498
Abraxas2	0.0405936	0.128254	0.498	0.413	0.0766435
Meis3	0.040603	0.140807	0.32	0.174	0.0766435
Ncln	0.0408444	0.128669	0.393	0.304	0.077048
Zkscan3	0.0409226	0.136317	0.709	0.628	0.0771443
Stt3b	0.041021	0.152165	0.559	0.498	0.0772587
Ilf3	0.0410377	0.158454	0.713	0.615	0.0772587
Asxl3	0.0410772	0.136576	0.348	0.287	0.0772817
Carm1	0.0411522	0.135932	0.453	0.332	0.0773716
Klc1	0.0412001	0.131192	0.352	0.271	0.0773809
2310009B15Rik	0.0412117	0.13965	0.498	0.437	0.0773809
Sec61a2	0.041245	0.127952	0.393	0.296	0.0773923
Got2	0.041295	0.155601	0.842	0.753	0.0774072
Arhgef12	0.0413075	0.134324	0.652	0.551	0.0774072
2010107E04Rik	0.0415257	0.143211	0.968	0.972	0.0777426
Rab8a	0.0415671	0.135227	0.595	0.538	0.0777426
Mrpl21	0.0415686	0.152108	0.842	0.81	0.0777426
Surf4	0.0416619	0.139262	0.543	0.49	0.0778065
Gsr	0.0416788	0.128914	0.563	0.466	0.0778065
Rpf1	0.0417022	0.136888	0.543	0.462	0.0778065
Trappc13	0.0417178	0.124053	0.462	0.413	0.0778065
Rbms2	0.0417499	0.138836	0.672	0.575	0.0778065
Chtop	0.0417788	0.145333	0.725	0.652	0.0778065
2010111I01Rik	0.0417946	0.153076	0.656	0.615	0.0778065
Nrd1	0.0420139	0.138951	0.672	0.603	0.0781635
Laptm4b	0.0420525	0.134312	0.34	0.251	0.0781841
Tmem128	0.0421932	0.12355	0.47	0.385	0.0783943
Elf2	0.0422497	0.137937	0.628	0.543	0.078448
Nipsnap2	0.0423592	0.121439	0.47	0.381	0.0785999
Shroom3	0.0424102	0.152165	0.571	0.498	0.078643
Sephs1	0.042474	0.123955	0.405	0.304	0.07871
Tle4	0.0425451	0.135341	0.526	0.441	0.0787903
Topors	0.0427832	0.165392	0.688	0.672	0.0791796
Rasa1	0.0429193	0.143101	0.547	0.482	0.0793797
Gcdh	0.0429537	0.120364	0.437	0.324	0.079391
Ncoa5	0.0429813	0.136512	0.364	0.283	0.079391
Ndufb11	0.0430334	0.143233	0.992	0.984	0.0794302
Emc3	0.0430585	0.127736	0.599	0.482	0.0794302
Papola	0.0431437	0.152016	0.858	0.83	0.0795358
Tfam	0.0432313	0.138539	0.696	0.583	0.0796455
Dnal4	0.0433178	0.127423	0.51	0.433	0.0797531
Dlat	0.0434712	0.131645	0.522	0.433	0.0799837
Polr2g	0.04352	0.146236	0.907	0.862	0.0800215
Mgat2	0.0440685	0.125937	0.486	0.425	0.0809776
Ensa	0.0441713	0.12841	0.599	0.462	0.0811141
Os9	0.0443216	0.12501	0.51	0.421	0.0813374
Jam3	0.0446912	0.130906	0.615	0.494	0.0819628
Slain2	0.0447345	0.125163	0.417	0.312	0.0819672
Naa20	0.0447514	0.145182	0.664	0.648	0.0819672
Fto	0.0448157	0.132332	0.563	0.462	0.0820322
Gpr180	0.0448838	0.140171	0.336	0.259	0.0820527
Polr2d	0.0448847	0.134092	0.599	0.547	0.0820527
Mgat4b	0.0449604	0.130862	0.599	0.466	0.082138
Tysnd1	0.0450569	0.12315	0.441	0.352	0.0822429
Metap2	0.045083	0.138825	0.996	0.996	0.0822429
Lpcat3	0.0451047	0.134101	0.632	0.534	0.0822429
Rtcb	0.0451697	0.147938	0.854	0.846	0.0823085
Scaf8	0.0452058	0.1181	0.429	0.328	0.0823215
Ddx41	0.0452511	0.137305	0.692	0.615	0.0823511
Nucb2	0.04529	0.124981	0.377	0.267	0.0823514
Man1a2	0.0453092	0.138655	0.704	0.591	0.0823514
Grpel1	0.04541	0.14453	0.87	0.862	0.0824375
Setd2	0.045453	0.153518	0.575	0.538	0.0824375
Nipa2	0.0454866	0.122917	0.466	0.368	0.0824375
Cnep1r1	0.0455057	0.120364	0.425	0.32	0.0824375
Nfyb	0.0455211	0.136051	0.595	0.534	0.0824375
Zcrb1	0.0455308	0.147885	0.85	0.83	0.0824375
B9d2	0.0456625	0.123543	0.393	0.291	0.0826232
R3hcc1	0.0457675	0.13206	0.579	0.494	0.0827104
Nifk	0.045769	0.140986	0.737	0.7	0.0827104
Znrf1	0.0458685	0.125626	0.506	0.405	0.0828063
Mcfd2	0.0459074	0.121521	0.449	0.372	0.0828063
Tbc1d16	0.045922	0.136808	0.648	0.53	0.0828063
Hspa4	0.0459387	0.156265	0.883	0.842	0.0828063
Adprh	0.0460368	0.140102	0.7	0.623	0.0829121
Zyx	0.0460558	0.14453	0.445	0.356	0.0829121
Itga8	0.0461947	0.157342	0.741	0.672	0.0831095
Usf1	0.0463905	0.124513	0.466	0.352	0.0834089
Rnf4	0.0464828	0.138081	0.64	0.547	0.0835219
Ptov1	0.0465515	0.138712	0.996	1	0.0835925
Mrps33	0.046646	0.14693	0.931	0.939	0.0837092
Rsl1d1	0.0468652	0.142942	0.964	0.964	0.0840494
Pdlim7	0.0468953	0.125323	0.462	0.389	0.0840504
Cmtm3	0.0470762	0.136673	0.587	0.53	0.0843213
Dcaf13	0.0471779	0.132172	0.466	0.381	0.0844502
Vrk1	0.0475686	0.12588	0.385	0.271	0.0850722
Snrnp40	0.0475853	0.140936	0.749	0.676	0.0850722
Mrpl13	0.0476562	0.148694	0.81	0.737	0.0851454
Atp2b1	0.0477178	0.149893	0.725	0.64	0.0852017
Eif1ad	0.0478074	0.124539	0.47	0.368	0.0853029
Pold2	0.0478581	0.140468	0.547	0.49	0.0853029
Oxct1	0.0478645	0.153212	0.866	0.814	0.0853029
Copg1	0.0479122	0.137089	0.628	0.563	0.0853174
Hcfc1	0.0479338	0.122898	0.526	0.409	0.0853174
Casp6	0.0479635	0.126542	0.393	0.308	0.0853174
Polr3k	0.0479929	0.137764	0.648	0.607	0.0853174
Dhps	0.0481298	0.13515	0.636	0.563	0.0854925
Kif1b	0.0481517	0.138081	0.636	0.575	0.0854925
Grn	0.0482823	0.125609	0.538	0.441	0.085671
Copb1	0.0483328	0.139262	0.798	0.668	0.0857069
Ralbp1	0.0484039	0.145366	0.765	0.688	0.0857795
Snrnp27	0.0487088	0.144786	0.862	0.862	0.0862173
Commd7	0.0487117	0.132084	0.583	0.514	0.0862173
Adipor2	0.0488314	0.122493	0.437	0.344	0.0863754
Ahsa2	0.0493425	0.125769	0.51	0.401	0.0871834
Rrp36	0.0493497	0.12711	0.381	0.296	0.0871834
Nptn	0.0493831	0.132377	0.36	0.251	0.0871882
Haus7	0.0494522	0.131576	0.348	0.259	0.087256
Ip6k2	0.0495551	0.13123	0.591	0.498	0.0873831
Wdr18	0.0496286	0.138088	0.721	0.611	0.0874585
Adk	0.0496932	0.137621	0.729	0.656	0.087497
Polr3h	0.0497358	0.120882	0.453	0.364	0.087497
Usp14	0.0497429	0.140524	0.709	0.709	0.087497
Svbp	0.0498404	0.143005	0.838	0.802	0.0876141
Golgb1	0.0500009	0.156569	0.842	0.814	0.0878419
Ifrd2	0.0501202	0.124703	0.49	0.389	0.0879971
Sf3b1	0.0501719	0.14373	0.992	0.984	0.0880334
Pigp	0.0502326	0.128934	0.595	0.514	0.0880855
Smim8	0.0503196	0.126342	0.417	0.344	0.0881835
Manbal	0.0503571	0.128976	0.478	0.409	0.0881949
Rpp25l	0.0505593	0.134269	0.733	0.636	0.0884717
Bap1	0.0505972	0.129305	0.36	0.275	0.0884717
Srpr	0.0506087	0.133265	0.648	0.583	0.0884717
Dbnl	0.0506678	0.13456	0.684	0.603	0.0885206
Mettl26	0.0507902	0.137784	0.749	0.632	0.0886514
Commd1	0.0508051	0.1432	0.846	0.798	0.0886514
Tmx2	0.0508454	0.123673	0.534	0.429	0.0886629
Smarcad1	0.0508811	0.133835	0.518	0.449	0.0886629
Rpusd4	0.0509054	0.124618	0.372	0.255	0.0886629
Babam1	0.0512048	0.137805	0.64	0.583	0.0891296
Crot	0.0513968	0.113636	0.417	0.32	0.0893505
Bcl10	0.051402	0.137144	0.591	0.526	0.0893505
Mau2	0.0514514	0.122402	0.518	0.377	0.0893505
Dctn3	0.0514846	0.146106	0.866	0.838	0.0893505
Mvk	0.0515394	0.13029	0.34	0.219	0.0893505
Gmnn	0.0515503	0.190174	0.279	0.15	0.0893505
Prkrip1	0.051552	0.118418	0.433	0.336	0.0893505
Zfp646	0.0516098	0.120565	0.433	0.36	0.0893961
Tmed2	0.0516647	0.150691	0.931	0.911	0.0894367
Frg1	0.0518481	0.138903	0.729	0.688	0.0896451
Rsl24d1	0.0518483	0.134956	0.692	0.648	0.0896451
Gtf3c6	0.0519335	0.142333	0.773	0.753	0.0896996
Swi5	0.051943	0.150994	0.976	0.98	0.0896996
Tmem222	0.0524224	0.131446	0.579	0.522	0.0904725
Klf3	0.0526343	0.124703	0.506	0.368	0.090783
Cald1	0.0527622	0.159276	0.822	0.814	0.0909484
Ttc37	0.0531688	0.124454	0.401	0.255	0.0915936
Ubac2	0.0532776	0.119003	0.466	0.368	0.0917253
2010320M18Rik	0.0534058	0.122103	0.526	0.437	0.0918903
Zfhx3	0.0535793	0.123269	0.518	0.429	0.0921331
Lsm7	0.0536788	0.142304	0.931	0.874	0.0922121
Atg101	0.0536979	0.123087	0.538	0.445	0.0922121
Tmem205	0.0537227	0.127833	0.628	0.526	0.0922121
Hif1a	0.0538626	0.144084	0.692	0.636	0.0922761
Impa1	0.0538779	0.120628	0.526	0.457	0.0922761
Hmgn3	0.0538911	0.140735	0.721	0.644	0.0922761
Zpr1	0.0538966	0.130667	0.623	0.522	0.0922761
Id1	0.0539486	-0.121046	0.453	0.449	0.0922761
Elp4	0.0539768	0.139197	0.328	0.206	0.0922761
Rab28	0.0539876	0.12306	0.372	0.304	0.0922761
Wac	0.0540484	0.144482	0.773	0.737	0.0923056
Cct4	0.0540698	0.134014	0.988	0.992	0.0923056
Med10	0.054213	0.131028	0.599	0.526	0.0924944
Hagh	0.0542501	0.124298	0.583	0.482	0.0925022
Med28	0.0545367	0.138267	0.761	0.692	0.092935
Armc10	0.0545979	0.124563	0.498	0.462	0.0929796
Lsm8	0.0546598	0.142896	0.806	0.798	0.0929796
Faim	0.0546611	0.117783	0.522	0.425	0.0929796
Retreg2	0.0549815	0.118377	0.502	0.381	0.0933659
Fnbp1l	0.0550349	0.147835	0.721	0.676	0.0933659
Unc50	0.0550512	0.121645	0.526	0.482	0.0933659
Ado	0.0550519	0.123869	0.457	0.356	0.0933659
Ubtf	0.0550752	0.143195	0.822	0.834	0.0933659
Ptprf	0.0550855	0.131576	0.607	0.506	0.0933659
Cuta	0.0552545	0.154664	0.725	0.684	0.0935964
Dgcr6	0.0553091	0.140046	0.814	0.753	0.093633
Stau2	0.0555149	0.121054	0.457	0.405	0.0939254
Zfp462	0.0556075	0.137852	0.583	0.49	0.093953
Nt5c	0.0556082	0.132659	0.583	0.478	0.093953
Atg5	0.0556588	0.121054	0.486	0.409	0.093953
Med7	0.0556636	0.117155	0.445	0.352	0.093953
Aga	0.0557906	0.136711	0.332	0.223	0.0941114
Smim12	0.0559765	0.115365	0.486	0.377	0.094369
Lrwd1	0.0560559	0.127833	0.389	0.267	0.0944097
Polr1d	0.0560672	0.138632	0.98	0.968	0.0944097
Mfsd14a	0.0561057	0.117141	0.437	0.328	0.0944185
Arpc1a	0.056329	0.139595	0.943	0.883	0.0947382
Mettl1	0.056382	0.151904	0.737	0.672	0.0947712
Cd47	0.0564259	0.127635	0.526	0.449	0.0947888
Erbb2	0.0565707	0.131487	0.312	0.227	0.0949758
Xab2	0.0567445	0.118738	0.449	0.312	0.0952114
Cd81	0.0568604	0.137728	0.943	0.935	0.095335
Plgrkt	0.0568854	0.120337	0.506	0.445	0.095335
Tox3	0.0569495	0.131898	0.494	0.377	0.0953863
3110040N11Rik	0.0570129	0.154648	0.287	0.15	0.0953878
1700037H04Rik	0.0570176	0.12582	0.417	0.368	0.0953878
Ap2s1	0.0570842	0.138105	0.866	0.838	0.095443
Armcx2	0.0571535	0.134987	0.559	0.49	0.0955025
Mrpl55	0.057364	0.126978	0.555	0.49	0.0957426
Degs1	0.0573646	0.121587	0.502	0.421	0.0957426
Thyn1	0.0575606	0.134733	0.709	0.66	0.0959592
Smarca5	0.0575722	0.153209	0.96	0.964	0.0959592
Mapre2	0.0575958	0.125713	0.352	0.259	0.0959592
Fam122a	0.0576934	0.117468	0.445	0.36	0.0960655
Ehmt1	0.0577763	0.150993	0.757	0.684	0.0961471
Actr2	0.0581389	0.127724	0.433	0.364	0.0966938
Lage3	0.0583286	0.136711	0.814	0.781	0.0969525
Cyr61	0.0585117	-0.113729	0.215	0.283	0.0971999
Pfdn5	0.0586773	0.129501	0.996	1	0.0974181
Iws1	0.0587968	0.143562	0.567	0.486	0.0975109
Hoxc6	0.0588166	0.158965	0.717	0.696	0.0975109
Bcap31	0.0588363	0.13867	0.725	0.729	0.0975109
Ndufs8	0.0588735	0.142342	0.891	0.895	0.0975156
Sptan1	0.058998	0.13754	0.696	0.603	0.0976649
Prkar1a	0.0592424	0.14392	0.891	0.887	0.0979942
Dbn1	0.059266	0.146682	0.725	0.692	0.0979942
C1d	0.0594571	0.135855	0.789	0.745	0.098253
Mrpl19	0.0595358	0.134545	0.66	0.587	0.0983254
Tmem109	0.0595701	0.149532	0.332	0.198	0.0983254
Rnaseh2a	0.0597003	0.146507	0.607	0.551	0.098483
Zdhhc12	0.059842	0.124421	0.336	0.243	0.0986594
Vti1b	0.0599529	0.119474	0.534	0.47	0.0987849
Leo1	0.0600378	0.139088	0.672	0.66	0.0987948
Tmem147	0.0600391	0.137933	0.798	0.717	0.0987948
Wdr82	0.0600634	0.120196	0.445	0.381	0.0987948
Ndufb7	0.0601249	0.139338	0.915	0.915	0.0988389
Hjurp	0.0602587	0.133857	0.474	0.389	0.0989909
Apip	0.0602872	0.121286	0.486	0.397	0.0989909
Usp4	0.0603958	0.119089	0.389	0.316	0.099112
Rab5c	0.0604944	0.134036	0.688	0.628	0.0992164
Mrpl46	0.0605796	0.120628	0.526	0.453	0.0992988
Dcun1d1	0.0606426	0.119383	0.409	0.348	0.0993448
Map3k7	0.0609629	0.123188	0.372	0.287	0.0998118
Hsp90ab1	0.0611239	0.106594	1	1	0.100018
Tsr3	0.0611938	0.128858	0.567	0.498	0.100074
Fh1	0.0613031	0.135153	0.733	0.664	0.100196
Smim27	0.0615758	0.129212	0.457	0.389	0.100583
Fip1l1	0.0616562	0.146883	0.785	0.794	0.100657
Prpf19	0.0618185	0.139113	0.842	0.773	0.100864
D17Wsu92e	0.0618975	0.115009	0.453	0.368	0.100898
H2afj	0.0619105	0.149641	0.636	0.64	0.100898
Lgmn	0.0620855	0.126683	0.385	0.312	0.101125
Usp7	0.0625088	0.138347	0.676	0.607	0.101756
Riok1	0.0628052	0.132984	0.636	0.555	0.10218
2022-09-09	0.0631165	0.119844	0.449	0.393	0.102628
Tmtc2	0.0632802	0.13206	0.352	0.308	0.102835
Prmt5	0.0633581	0.137148	0.632	0.543	0.102903
Rpf2	0.0634775	0.127833	0.628	0.551	0.103038
Robo2	0.0635851	0.178126	0.968	0.972	0.103113
Mrps16	0.0636123	0.136576	0.814	0.773	0.103113
Drap1	0.0636329	0.144542	0.943	0.923	0.103113
Ube2d1	0.063752	0.116844	0.421	0.352	0.103183
Tbl3	0.0637879	0.132776	0.348	0.259	0.103183
H2-Ab1	0.0638245	0.143101	0.368	0.235	0.103183
Ddx49	0.0638297	0.118079	0.51	0.397	0.103183
Afg3l2	0.0638846	0.120035	0.405	0.3	0.103183
Bptf	0.0638942	0.165003	0.976	0.943	0.103183
Gcsh	0.06407	0.135678	0.826	0.769	0.103408
Zfp623	0.064181	0.123838	0.336	0.223	0.103528
Sp3	0.0643189	0.114483	0.498	0.356	0.103692
Mrps11	0.0649909	0.122602	0.555	0.486	0.104716
Fam103a1	0.065031	0.127833	0.692	0.563	0.104721
Polb	0.0650774	0.135438	0.494	0.401	0.104734
Lama5	0.065113	0.129812	0.316	0.211	0.104734
Cdk9	0.0652061	0.132633	0.753	0.725	0.104825
Ubfd1	0.0653958	0.120003	0.514	0.441	0.10507
Acly	0.0654364	0.121978	0.425	0.377	0.105076
Chst2	0.0655164	0.13433	0.316	0.223	0.105145
Litaf	0.0656646	0.119248	0.49	0.389	0.105323
Mrpl28	0.0657044	0.144999	0.862	0.854	0.105327
Gtf2e2	0.0659577	0.129954	0.68	0.632	0.105674
Rlim	0.0660476	0.132389	0.543	0.538	0.105718
Zfp507	0.0660598	0.114334	0.445	0.348	0.105718
Sox11	0.0661783	0.192931	0.943	0.964	0.105835
Jpt1	0.0662074	0.155032	0.915	0.895	0.105835
Gosr2	0.0663071	0.177514	0.279	0.113	0.105935
Cited1	0.0663834	0.270817	0.98	0.951	0.105997
Ripply2	0.0664572	-0.127415	0.13	0.263	0.106042
Lonp1	0.0664861	0.125831	0.615	0.534	0.106042
Ccnjl	0.0665339	0.125163	0.332	0.235	0.106058
Cenpc1	0.0666073	0.113854	0.417	0.324	0.106116
Cdc73	0.0666979	0.113903	0.498	0.368	0.106167
Pex19	0.0667142	0.114483	0.457	0.372	0.106167
Snrnp200	0.0667719	0.143629	0.628	0.607	0.106199
Aven	0.0671568	0.119708	0.397	0.32	0.106717
Cuedc2	0.0671725	0.138979	0.927	0.858	0.106717
Gm14964	0.0672622	0.141236	0.664	0.571	0.106799
Strn4	0.0673042	0.117195	0.498	0.381	0.106806
Cks1b	0.0673751	0.150854	0.81	0.737	0.106859
Smc5	0.0674708	0.123087	0.49	0.437	0.106951
Pwwp2a	0.0676814	0.128107	0.595	0.506	0.107225
Sdf2l1	0.0677428	0.133921	0.344	0.259	0.107263
Mydgf	0.0678678	0.134398	0.769	0.733	0.107343
Nufip2	0.0678694	0.139921	0.713	0.619	0.107343
mt-Co2	0.0680239	0.108273	1	1	0.107528
Tubg1	0.0680755	0.122917	0.453	0.356	0.107549
Ifrd1	0.0681313	0.111082	0.478	0.368	0.107556
Eif3c	0.0681561	0.138292	0.992	0.992	0.107556
Wwp2	0.0681936	0.138421	0.429	0.312	0.107556
Trpc4ap	0.0684032	0.123668	0.579	0.518	0.107781
Saal1	0.068412	0.123309	0.478	0.393	0.107781
Arpc5	0.0685681	0.124902	0.623	0.551	0.107967
Trim59	0.0686272	0.137278	0.368	0.291	0.108
Clic1	0.0687341	0.15251	0.964	0.976	0.108109
Cep68	0.0689309	0.129411	0.34	0.186	0.108358
Nelfb	0.0689908	0.119646	0.575	0.466	0.108364
Myo1b	0.0690107	0.125163	0.51	0.405	0.108364
Lrch3	0.0690966	0.11441	0.429	0.385	0.108439
Tmem132a	0.0691768	0.122308	0.49	0.397	0.108504
Inpp5f	0.0694911	0.120764	0.389	0.275	0.108937
Alkbh7	0.0695988	0.116682	0.522	0.486	0.109046
Cd59a	0.0700472	0.124103	0.348	0.296	0.109688
Ankrd13a	0.0702382	0.116443	0.385	0.3	0.109876
Gsdme	0.0702448	0.113524	0.478	0.356	0.109876
Lsm10	0.0703735	0.113511	0.498	0.441	0.109959
Plrg1	0.0703756	0.113428	0.445	0.356	0.109959
Bnip1	0.0705827	0.122486	0.364	0.304	0.110187
Gtf2b	0.0705988	0.124642	0.64	0.518	0.110187
Fam58b	0.0707343	0.114171	0.409	0.3	0.110338
Prmt9	0.0708339	0.143788	0.296	0.146	0.110432
Tsc22d2	0.0708754	0.121201	0.413	0.352	0.110436
Fam193a	0.0710612	0.128107	0.579	0.502	0.110665
Uchl5	0.0712254	0.118086	0.462	0.397	0.11086
Rpap3	0.0713293	0.118821	0.591	0.474	0.110861
Gid8	0.0713705	0.114171	0.381	0.296	0.110861
Wdr77	0.0713904	0.124207	0.579	0.506	0.110861
0610030E20Rik	0.071393	0.114031	0.425	0.364	0.110861
Dcp2	0.0714211	0.11449	0.393	0.324	0.110861
1810022K09Rik	0.071527	0.138586	0.891	0.846	0.110964
Mrpl49	0.0718979	0.124766	0.575	0.518	0.111479
Pusl1	0.071957	0.120489	0.36	0.251	0.11151
Cse1l	0.0724174	0.117783	0.441	0.32	0.112124
Apeh	0.0724326	0.115736	0.377	0.279	0.112124
Vipas39	0.0725618	0.123275	0.393	0.316	0.112227
Tpst2	0.0726159	0.132706	0.32	0.215	0.112227
Fbxo18	0.0726215	0.11641	0.538	0.449	0.112227
Zfp385a	0.0726569	0.124298	0.543	0.453	0.112227
Cep290	0.0727238	0.129511	0.506	0.409	0.112269
Fancl	0.0728332	0.137717	0.3	0.19	0.112377
Rpa3	0.0728957	0.129912	0.372	0.32	0.112412
Flna	0.0731332	0.140176	0.66	0.636	0.112717
Prdm5	0.0732922	0.115459	0.381	0.267	0.1129
Grk6	0.0733311	0.115614	0.453	0.344	0.1129
Ehd1	0.0733736	0.114113	0.462	0.377	0.112904
Twsg1	0.0734789	0.113	0.372	0.271	0.113005
Igf2bp1	0.0736765	0.137201	0.628	0.575	0.113247
Nans	0.0737909	0.124136	0.514	0.449	0.113362
Ei24	0.0741708	0.127428	0.684	0.595	0.113884
Rpl4	0.0744016	0.111424	1	1	0.114156
Psme1	0.0744285	0.141818	0.834	0.769	0.114156
Cep131	0.0745484	0.112293	0.425	0.324	0.114278
Bccip	0.0746752	0.136192	0.749	0.733	0.114411
Ubl7	0.0747603	0.120425	0.372	0.296	0.114446
Otulin	0.0747791	0.124096	0.486	0.409	0.114446
Cnnm3	0.0751603	0.139762	0.291	0.194	0.114968
Nup85	0.0752211	0.164622	0.267	0.142	0.114997
Glrx3	0.0752607	0.133445	0.984	0.976	0.114997
Impdh2	0.0753038	0.134498	0.98	0.964	0.115001
Plekha1	0.0754444	0.119545	0.34	0.239	0.115154
Hoxb6	0.0759248	0.132686	0.53	0.514	0.115825
Pqbp1	0.0759897	0.11276	0.474	0.385	0.115862
Anapc7	0.0760342	0.118883	0.526	0.474	0.115868
Smarcc1	0.0761337	0.151888	0.972	0.947	0.115905
Nol6	0.0761673	0.129896	0.32	0.219	0.115905
Hars	0.0761816	0.118532	0.619	0.518	0.115905
Polr2c	0.0764755	0.13336	0.895	0.846	0.11629
Tpd52l2	0.0766092	0.131907	0.733	0.672	0.116431
Praf2	0.0766625	0.122725	0.34	0.215	0.116445
Gtf2h3	0.0767001	0.11876	0.372	0.312	0.116445
Cox6b1	0.076823	0.130133	0.98	0.996	0.116569
Phf20l1	0.0769033	0.126606	0.672	0.599	0.116628
Mllt1	0.0769668	0.149246	0.287	0.174	0.116662
Ctnnbip1	0.0772574	0.156569	0.826	0.785	0.11704
Tnpo1	0.0773413	0.11832	0.555	0.425	0.117076
Wdr5	0.0773633	0.117437	0.377	0.235	0.117076
Slc35b1	0.0774243	0.137621	0.304	0.206	0.117106
Plpp3	0.0774984	0.119003	0.409	0.344	0.117107
Ddhd2	0.0775077	0.113854	0.377	0.296	0.117107
Capzb	0.0777191	0.143998	0.915	0.883	0.117347
Gpx8	0.0777875	0.120018	0.615	0.555	0.117347
Rpap1	0.0777904	0.13991	0.287	0.178	0.117347
Aspscr1	0.0779958	0.116354	0.51	0.425	0.117594
Drg1	0.0782156	0.126752	0.664	0.587	0.117863
Bmp1	0.0783403	0.113538	0.409	0.3	0.117988
Hoxb4	0.0784685	0.155473	0.81	0.717	0.118119
Ift74	0.07852	0.132964	0.834	0.745	0.118134
Hspbp1	0.0787307	0.115365	0.466	0.381	0.118388
Itm2c	0.0790178	0.136293	0.866	0.749	0.118694
Bop1	0.0790181	0.118092	0.429	0.36	0.118694
Eif3l	0.0791412	0.136265	0.972	0.972	0.118816
Sfswap	0.0795197	0.123116	0.441	0.385	0.119322
Trabd	0.0795982	0.115365	0.441	0.381	0.119376
M6pr	0.0798817	0.11313	0.425	0.352	0.119738
Spout1	0.080072	0.117783	0.551	0.518	0.119894
Chd6	0.0800758	0.14066	0.785	0.717	0.119894
Exosc5	0.0801123	0.128555	0.733	0.668	0.119894
Ssbp3	0.080539	0.133326	0.785	0.737	0.120469
Abi2	0.0805891	0.116354	0.51	0.397	0.12048
Ilkap	0.0806703	0.13084	0.733	0.672	0.120501
Atxn2l	0.0806877	0.117783	0.567	0.482	0.120501
Usp3	0.0807389	0.122	0.603	0.522	0.120514
Mrps22	0.0809545	0.113511	0.53	0.437	0.120772
Agl	0.0812092	0.147593	0.563	0.482	0.121056
Ppfibp1	0.08123	0.119935	0.409	0.344	0.121056
Hnrnpul2	0.0812869	0.139314	0.713	0.688	0.121077
Kat6b	0.0813569	0.118309	0.53	0.478	0.121089
Ndufs1	0.08138	0.121625	0.567	0.498	0.121089
Por	0.0822583	0.116036	0.482	0.429	0.122332
Bmp7	0.0824977	0.139284	0.623	0.502	0.122624
Scmh1	0.0826177	0.113436	0.397	0.283	0.122738
Casc3	0.0828087	0.121509	0.466	0.413	0.122957
Sipa1l1	0.0828841	0.140021	0.789	0.777	0.123005
Mphosph8	0.0829842	0.138976	0.81	0.757	0.123056
Gtf3c4	0.0830054	0.116153	0.381	0.3	0.123056
Egln2	0.0830946	0.12366	0.733	0.668	0.123124
Ngdn	0.0832835	0.120576	0.636	0.51	0.123295
Ppdpf	0.0832967	0.146708	0.895	0.879	0.123295
Trappc2l	0.0835109	0.120489	0.656	0.599	0.123547
Cacfd1	0.0836135	0.113636	0.409	0.352	0.123635
Tmem165	0.0842911	0.130378	0.85	0.789	0.124572
Fxr2	0.0846349	0.117783	0.494	0.421	0.124976
Anks3	0.0847101	0.110305	0.429	0.328	0.124976
Dis3	0.0847413	0.122938	0.372	0.308	0.124976
Hax1	0.0847643	0.125809	0.623	0.583	0.124976
Gpbp1	0.0848218	0.123145	0.696	0.632	0.124976
Aph1a	0.084829	0.122927	0.64	0.583	0.124976
Amph	0.0849095	0.124642	0.364	0.296	0.12503
Atp6v0d1	0.0850521	0.127155	0.729	0.664	0.125148
Rbck1	0.0851724	0.113329	0.466	0.389	0.125148
Eif2b3	0.0851809	0.119721	0.482	0.449	0.125148
Marcks	0.0851966	0.172626	0.935	0.887	0.125148
Vps53	0.0852101	0.109589	0.441	0.36	0.125148
Stx8	0.0853669	0.112424	0.53	0.453	0.125314
Adck5	0.0854189	0.113329	0.425	0.348	0.125325
Rsbn1	0.085506	0.122602	0.526	0.49	0.12538
Pcgf6	0.0855443	0.111681	0.413	0.304	0.12538
Cntln	0.0857494	0.130362	0.482	0.372	0.125615
Atp5c1	0.0858706	0.127833	0.992	1	0.125712
1500011K16Rik	0.0859039	0.114684	0.51	0.429	0.125712
Lypla1	0.0861158	0.122477	0.32	0.202	0.125957
Elavl1	0.0862382	0.13173	0.802	0.725	0.126071
Dus1l	0.0863783	0.113231	0.478	0.372	0.126211
Tprkb	0.0864563	0.108634	0.449	0.368	0.126232
Znhit2	0.0864817	0.114739	0.364	0.275	0.126232
Gamt	0.0865648	0.145542	0.279	0.17	0.126289
Scamp2	0.0866723	0.115792	0.526	0.405	0.126373
Dag1	0.0867118	0.119918	0.575	0.441	0.126373
Vta1	0.086841	0.113416	0.575	0.474	0.126497
Psmc6	0.0868982	0.132512	0.96	0.915	0.126515
Rabgap1	0.087339	0.1267	0.623	0.575	0.127084
Mgmt	0.0873787	0.123614	0.304	0.215	0.127084
Krtcap2	0.0875463	0.135802	0.939	0.947	0.127263
Thap12	0.0876368	0.113944	0.526	0.445	0.127308
Tmem11	0.0876673	0.129729	0.684	0.664	0.127308
Tia1	0.0877856	0.146806	0.927	0.887	0.127353
Cmc2	0.0878281	0.116153	0.397	0.283	0.127353
Rhot1	0.0878325	0.108289	0.405	0.324	0.127353
Scfd1	0.0880047	0.115943	0.591	0.498	0.127537
Ep400	0.0882775	0.122077	0.559	0.51	0.127867
Skp1a	0.0883641	0.149036	0.911	0.911	0.127927
Drg2	0.0884404	0.120364	0.559	0.486	0.127957
Thumpd1	0.0884744	0.122524	0.676	0.64	0.127957
Anapc4	0.0885395	0.114684	0.49	0.441	0.127986
Mettl2	0.0887251	0.113759	0.377	0.296	0.128166
Atp6v0e2	0.0887546	0.122962	0.344	0.235	0.128166
Arl15	0.0888353	0.124214	0.352	0.206	0.128217
Mmp23	0.0891393	0.116561	0.401	0.332	0.128469
Nme2	0.0891443	0.142636	0.283	0.15	0.128469
mt-Nd2	0.0891946	0.109909	1	1	0.128469
Mecom	0.0892392	-0.135297	0.138	0.219	0.128469
Dynll2	0.0892427	0.135861	0.713	0.591	0.128469
Man2a2	0.0892812	0.123233	0.296	0.219	0.128469
Ccdc12	0.0893356	0.131166	0.814	0.757	0.128482
Elac2	0.0895044	0.112795	0.368	0.308	0.128604
9130401M01Rik	0.0895112	0.118546	0.644	0.51	0.128604
Ppp4r2	0.0896365	0.131843	0.858	0.777	0.128704
Gm30025	0.0896713	0.114739	0.364	0.251	0.128704
Selenoh	0.0899326	0.141617	0.951	0.943	0.128979
Mtdh	0.0899721	0.141403	0.976	0.964	0.128979
Susd6	0.0899992	0.177514	0.259	0.113	0.128979
Senp7	0.0901799	0.120144	0.547	0.457	0.129173
Celf1	0.0902718	0.130726	0.769	0.717	0.129184
Fyttd1	0.0902784	0.127017	0.709	0.664	0.129184
Cul5	0.0906025	0.125505	0.692	0.628	0.129559
R3hdm1	0.090632	0.126041	0.725	0.652	0.129559
Pank2	0.0907312	0.107393	0.413	0.3	0.129577
Pafah1b2	0.0907359	0.121186	0.664	0.603	0.129577
Ebpl	0.0908004	0.124939	0.713	0.636	0.129604
Fam60a	0.0908525	0.129386	0.85	0.814	0.129613
Ccdc174	0.0909385	0.123986	0.668	0.591	0.129671
Nek7	0.0910762	0.106843	0.381	0.32	0.129802
Kif2a	0.091177	0.126327	0.652	0.652	0.129849
Sra1	0.0912005	0.128649	0.741	0.648	0.129849
Rnaseh2c	0.0914078	0.141478	0.806	0.733	0.130079
Bud13	0.0916503	0.124772	0.296	0.19	0.130315
Gdnf	0.0916656	0.12964	0.372	0.308	0.130315
Lbp	0.0917917	0.116072	0.328	0.235	0.130429
Arhgdia	0.091979	0.13667	0.814	0.822	0.130604
[truncated: 841 more rows]

## Sheet: Tub_progenitors1.MutVsCTRL.DEGs
Gene	p_val	avg_logFC	pct.1	pct.2	p_val_adj
Rpl29	2.42675e-120	-0.387002	1	1	1.11485e-116
Gm10260	1.01563e-83	2.21114	0.844	0.037	2.33291e-80
Uba52	6.92859e-51	0.622579	1	0.985	1.061e-47
Rps18	6.729e-36	-0.148085	1	1	7.72826e-33
Rplp0	3.7354e-35	-0.100488	1	1	3.43209e-32
Tpm3-rs7	7.13808e-34	0.878366	0.85	0.221	5.46539e-31
Rps2	2.04021e-32	0.366346	1	1	1.33896e-29
Eif3j1	1.42365e-28	0.736775	0.983	0.765	8.17529e-26
Ubc	1.95082e-22	-0.223853	0.994	1	9.95783e-20
Gm10036	1.18231e-17	-0.393419	0.763	0.882	5.43152e-15
Ppp1r14a	2.90351e-17	-0.491951	0.694	0.956	1.21261e-14
Cox5b	1.3012e-16	0.409641	1	1	4.98141e-14
Irak1bp1	4.27672e-13	0.545507	0.775	0.456	1.51133e-10
Gm10076	4.85074e-13	0.429868	1	1	1.59173e-10
Atp5k	2.21214e-12	0.350667	1	1	6.77505e-10
Pebp1	4.69194e-12	0.313363	1	1	1.34717e-09
Pdia6	5.9676e-12	0.399717	1	1	1.61266e-09
Erh	6.95338e-12	0.407285	1	0.993	1.77466e-09
Oaz1	1.60797e-11	0.300633	1	1	3.8879e-09
Alad	3.76371e-11	-0.295836	0.798	0.824	8.64525e-09
Maged1	4.0199e-11	0.382409	1	0.993	8.794e-09
Gm13305	8.04464e-11	-0.396678	0.439	0.735	1.67987e-08
Arf5	1.05635e-10	0.352747	1	1	2.10995e-08
Smarca4	2.99262e-10	0.460504	0.988	0.897	5.72836e-08
Hspa8	1.3672e-09	0.299219	1	1	2.51237e-07
Des	1.43e-09	-0.347882	0.468	0.713	2.52669e-07
Eif3j2	2.05026e-09	-0.280483	0.59	0.801	3.48848e-07
Snrpg	2.62609e-09	0.343579	1	1	4.30867e-07
Gstp1	4.00734e-09	0.446241	0.85	0.706	6.34818e-07
Tmsb10	6.40457e-09	0.382658	1	1	9.80753e-07
Usp50	7.48737e-09	0.474452	0.803	0.61	1.10958e-06
Cdk4	1.05761e-08	0.300921	1	1	1.51833e-06
Wdr89	1.19209e-08	-0.240637	0.728	0.765	1.65954e-06
Sec61g	1.43507e-08	0.314558	1	1	1.93904e-06
Filip1l	2.44616e-08	-0.380229	0.659	0.846	3.21075e-06
Il11ra1	3.04482e-08	0.460077	0.936	0.772	3.88553e-06
Ciapin1	3.80216e-08	0.422978	0.89	0.765	4.72084e-06
Serpinh1	4.27002e-08	0.321757	1	1	5.16223e-06
Zfp846	5.86197e-08	0.400657	0.613	0.309	6.80053e-06
Srsf2	5.92123e-08	0.328357	1	0.993	6.80053e-06
Gm7324	1.08805e-07	0.47021	0.462	0.029	1.21915e-05
Mmp14	1.38826e-07	0.416211	0.954	0.897	1.51849e-05
Phb	1.58466e-07	0.374498	0.96	0.926	1.693e-05
D8Ertd738e	1.77441e-07	0.334004	1	1	1.85264e-05
Gadd45gip1	2.7941e-07	0.380662	0.942	0.868	2.85247e-05
Bst2	2.87549e-07	-0.406256	0.393	0.588	2.87174e-05
Hmga1	4.10869e-07	0.447848	0.601	0.404	4.01603e-05
Vcp	4.21412e-07	0.301622	1	1	4.03327e-05
Ppp1r14b	4.3031e-07	0.322404	1	1	4.03437e-05
Hist3h2ba	4.58176e-07	0.488376	0.855	0.588	4.20972e-05
P4hb	5.95974e-07	0.352914	0.994	0.978	5.36844e-05
Fam32a	1.26643e-06	0.359889	0.983	0.904	0.000111884
1810058I24Rik	1.44285e-06	0.34465	0.994	0.971	0.000125066
Wdfy1	1.51799e-06	0.375639	0.665	0.449	0.000129117
Sfr1	1.5478e-06	0.305601	1	1	0.000129117
Isyna1	1.57391e-06	0.389897	0.965	0.926	0.000129117
Ctdspl	1.71388e-06	0.377335	0.971	0.904	0.000138133
G0s2	2.42948e-06	-0.324552	0.763	0.846	0.000192432
Id2	2.70898e-06	-0.199211	0.948	0.978	0.000210933
Srrt	3.31379e-06	0.399518	0.942	0.794	0.000253726
Rida	3.76744e-06	-0.286411	0.647	0.779	0.000283731
Luc7l3	4.85963e-06	0.315924	1	0.971	0.000360083
Hspa5	8.10709e-06	0.340557	1	0.993	0.000591174
Rtn1	9.16658e-06	-0.428342	0.225	0.368	0.000657989
Tpbg	9.81548e-06	0.363917	0.659	0.485	0.000693728
Nnat	1.16794e-05	0.454257	0.884	0.831	0.000812957
Anxa5	1.2399e-05	0.360249	1	0.978	0.000831695
Gstk1	1.24351e-05	0.34352	0.543	0.279	0.000831695
Ppia	1.24917e-05	0.245676	1	1	0.000831695
Jun	1.39925e-05	-0.203463	0.965	0.993	0.000918308
Rac1	1.46744e-05	0.323757	0.983	0.993	0.000949495
Rnf187	2.10428e-05	0.300941	0.988	0.993	0.00134265
Dlk1	2.17643e-05	0.812642	0.561	0.324	0.00136966
Arpc1b	2.33585e-05	0.399545	0.977	0.919	0.00145012
Banf1	2.53669e-05	0.318506	1	0.985	0.00155381
Snapc1	2.64727e-05	-0.187794	0.422	0.559	0.00158482
Magt1	2.65632e-05	0.33275	0.925	0.838	0.00158482
Slc1a5	2.79092e-05	0.37193	0.416	0.14	0.00163561
Trappc6a	2.81265e-05	-0.12795	0.908	0.904	0.00163561
Slc16a3	3.77729e-05	-0.207428	0.63	0.757	0.00216911
Basp1	3.91164e-05	0.434126	0.988	0.993	0.00221853
Gucy1a1	4.04828e-05	-0.175175	0.919	0.971	0.00226803
Klf9	4.36865e-05	-0.220769	0.451	0.529	0.00241802
Aida	4.60295e-05	0.329212	0.751	0.551	0.00251738
Hoxa5	4.78379e-05	0.342411	0.642	0.456	0.0025855
Ip6k2	5.13916e-05	0.330044	0.815	0.676	0.00273832
Pomp	5.18575e-05	0.272267	1	0.993	0.00273832
Sec61b	5.45649e-05	0.288292	1	1	0.00284854
Ostc	5.95673e-05	0.314978	0.988	1	0.00307474
Calr	6.04185e-05	0.303496	1	1	0.00308403
Dhx15	6.16089e-05	0.305568	0.96	0.934	0.00310247
Myo6	6.21304e-05	-0.190433	0.705	0.846	0.00310247
Osr1	6.36411e-05	0.400064	0.671	0.5	0.00314373
Wdr6	7.27564e-05	0.356207	0.873	0.787	0.00352121
Adat2	7.28155e-05	-0.178841	0.387	0.581	0.00352121
Canx	7.36783e-05	0.326415	0.988	0.963	0.00352581
Slc9a5	7.52534e-05	0.413567	0.382	0.059	0.00356406
Hist1h2ap	8.342e-05	0.721437	0.96	0.816	0.00391053
Calm3	8.51944e-05	0.296694	0.988	0.993	0.00395336
Mpc2	8.64352e-05	-0.131183	0.983	0.993	0.00397083
Cnbp	8.8646e-05	0.267559	1	1	0.00403208
Ybx3	8.98428e-05	0.282357	1	0.993	0.00404645
Igfbp5	9.10389e-05	0.558957	0.919	0.86	0.00406051
Id4	0.000101995	-0.299586	0.618	0.706	0.00450542
Fasn	0.000106917	0.31634	0.757	0.596	0.00464373
mt-Nd6	0.000107147	-0.276435	0.642	0.787	0.00464373
Rpl27	0.000109073	0.260657	1	1	0.00468301
Tmem14c	0.000110212	0.312196	0.983	0.912	0.0046881
Mrpl58	0.000119425	0.305823	0.983	0.919	0.0050026
Mapre1	0.000120145	0.298247	0.971	0.912	0.0050026
Manf	0.000120873	0.326259	1	0.978	0.0050026
Ajap1	0.000131821	0.397738	0.474	0.287	0.00540701
Fkrp	0.000149362	-0.148618	0.572	0.713	0.00607228
Nudt19	0.000156422	-0.153388	0.601	0.684	0.00630353
Cyr61	0.000158921	-0.196369	0.751	0.809	0.0063221
Etnk1	0.000159635	-0.174327	0.723	0.801	0.0063221
Marcksl1	0.00016463	0.250477	1	1	0.00646418
Limd2	0.000167427	0.318641	0.902	0.882	0.0065183
Fdps	0.000171592	0.411479	0.838	0.676	0.00662432
Spsb3	0.000176529	0.287563	0.561	0.368	0.00675811
Snrpf	0.000179277	0.264612	1	1	0.00680661
Tagln	0.000195865	-0.472734	0.746	0.787	0.00737544
Cox7c	0.000207803	0.23416	1	1	0.00776137
Arl3	0.0002231	0.288333	0.988	0.919	0.00815686
Camk2n1	0.000223679	-0.112516	0.896	0.941	0.00815686
Ivns1abp	0.000223719	-0.137939	0.884	0.882	0.00815686
Fkbp10	0.000229028	0.307664	0.925	0.89	0.00828469
Prdx1	0.000233197	0.259142	1	1	0.0083696
Uqcr11	0.000240962	0.261242	1	1	0.00851232
Maged2	0.00024923	0.334364	1	1	0.00851232
Tcf21	0.000249401	-0.123672	0.896	0.956	0.00851232
Gsn	0.000249676	0.350423	0.971	0.904	0.00851232
Fam118a	0.000250158	-0.200542	0.254	0.426	0.00851232
Mest	0.000250383	0.427741	1	1	0.00851232
Plcg1	0.000251159	0.294666	0.647	0.463	0.00851232
Agtr2	0.000252904	0.420075	0.41	0.199	0.00851232
Calm1	0.00025385	0.291895	1	1	0.00851232
Rcn3	0.000256386	0.297142	0.994	0.993	0.00853505
Ywhah	0.000261211	0.306488	0.965	0.956	0.00858524
Cwc15	0.000262628	0.281949	0.988	0.978	0.00858524
Lox	0.0002635	-0.323101	0.399	0.507	0.00858524
Rpl35	0.000273207	0.216472	1	1	0.00881256
Ssr2	0.000274394	0.268127	1	1	0.00881256
Fosb	0.000276232	-0.297199	0.671	0.779	0.00881256
Idi1	0.000288829	0.343733	0.59	0.36	0.00902946
Vdac1	0.000289359	0.257521	1	1	0.00902946
Ubb	0.000290255	0.233149	1	1	0.00902946
Cfl1	0.000291706	0.239221	1	1	0.00902946
H2afy	0.000293058	0.261267	1	1	0.00902946
Thoc5	0.000294823	0.293296	0.699	0.485	0.00902946
Ppp1ca	0.000299052	0.253432	1	1	0.00909831
Il33	0.00031346	-0.219084	0.59	0.721	0.00943771
Ndn	0.000315805	0.28066	0.983	0.926	0.00943771
Rpn1	0.000317266	0.297946	0.931	0.897	0.00943771
Scd2	0.000320464	0.330049	0.954	0.934	0.00943771
Sparcl1	0.00032192	0.414888	0.705	0.588	0.00943771
Arhgap24	0.000323984	-0.191291	0.358	0.478	0.00943771
Atp5j2	0.000324588	0.247967	1	1	0.00943771
Tmem167	0.000327095	0.268883	1	1	0.00945079
Fkbp1a	0.000339761	0.267183	1	1	0.00975538
Nr2f1	0.000347553	0.356835	0.879	0.757	0.00991714
Coq5	0.000360813	0.298072	0.815	0.699	0.010232
Sf1	0.000363166	0.294592	0.919	0.831	0.0102355
Ptpn1	0.000365967	0.30156	0.879	0.765	0.0102515
Prdx2	0.000383823	0.218977	1	1	0.0106866
Psma7	0.00039184	0.256023	1	1	0.0108441
Rps21	0.00039781	0.222443	1	1	0.0109434
Hnrnpa3	0.00040242	0.294679	1	1	0.0110043
Ide	0.000405779	-0.131743	0.584	0.743	0.0110305
Tril	0.000443333	0.371431	0.965	0.904	0.0119804
Neu1	0.00045113	-0.212466	0.353	0.434	0.0121198
Ptgis	0.000464368	0.344918	0.746	0.654	0.0124021
Tma7	0.000467038	0.248605	1	0.993	0.0124021
Rex1bd	0.000475554	0.298854	0.983	0.934	0.0125403
Ankrd13a	0.000477698	0.286949	0.618	0.375	0.0125403
Rpl36a-ps1	0.000496573	-0.138615	0.445	0.632	0.0129617
Sfpq	0.000532239	0.295182	1	0.985	0.0138142
Psmd1	0.000541887	0.292822	0.954	0.941	0.0139648
Praf2	0.000544122	0.291828	0.728	0.522	0.0139648
Noc4l	0.000571497	0.283805	0.711	0.5	0.0145859
Fth1	0.000580746	0.240077	1	1	0.01474
Pttg1	0.000640275	0.388489	0.803	0.779	0.0161617
Atp5e	0.000673208	0.249992	1	1	0.0169001
Dcakd	0.000689331	0.286881	0.971	0.897	0.0172108
Dcaf7	0.000711196	0.286656	0.746	0.596	0.0176607
Tmx4	0.000736289	-0.123142	0.676	0.772	0.0181856
Rnf6	0.000749994	-0.105962	0.792	0.794	0.018425
Dynlt1f	0.000772958	0.292905	0.867	0.765	0.0188881
Rhoc	0.000791305	0.294882	0.994	0.934	0.0192342
Grcc10	0.000806144	0.290709	0.827	0.735	0.0194767
Psma3	0.000809764	0.240723	1	0.993	0.0194767
Ptma	0.000834447	0.232589	1	1	0.0199659
Akt1	0.000847494	0.277666	0.942	0.89	0.020173
Wdr83os	0.000855005	0.288069	0.96	0.934	0.0202469
Rragd	0.000864217	-0.132423	0.561	0.662	0.0203027
Slc35b1	0.0008662	0.292168	0.728	0.669	0.0203027
Zfp207	0.000905512	0.272354	0.988	0.971	0.0209863
Rps27rt	0.000908335	-0.131313	0.486	0.618	0.0209863
Atox1	0.000909072	0.276571	0.977	0.978	0.0209863
Sub1	0.000931625	0.229411	1	1	0.0213994
Lamtor3	0.000966826	-0.101886	0.844	0.86	0.0220975
Gamt	0.000971686	0.288881	0.74	0.522	0.0220987
Romo1	0.000987538	0.257392	1	0.993	0.0223485
Pth1r	0.00100481	-0.119451	0.746	0.853	0.0226278
Mt1	0.00102545	-0.306171	0.243	0.375	0.02298
Carm1	0.00103445	0.284788	0.751	0.574	0.0230693
Pcbp4	0.001049	0.274429	0.977	0.934	0.0232807
Tomm40	0.0010624	0.274475	0.994	0.956	0.0233655
Hspb1	0.00106299	0.420649	0.63	0.5	0.0233655
Psmb5	0.00106973	0.248235	1	1	0.0234017
Id1	0.00109371	-0.210137	0.879	0.897	0.0238127
Ddost	0.00110491	0.255135	1	1	0.0238684
Negr1	0.0011097	-0.198365	0.734	0.816	0.0238684
Nfib	0.00111185	0.344222	0.769	0.699	0.0238684
Rtf1	0.00112552	0.263768	0.994	0.985	0.0240099
Ccdc8	0.00113389	-0.124484	0.636	0.662	0.0240099
Ube2l3	0.00113412	0.255295	0.994	0.985	0.0240099
Rab26os	0.00115395	0.270189	0.642	0.551	0.0242408
Fads1	0.00115881	0.281192	0.63	0.463	0.0242408
Ssbp4	0.00116086	0.277678	0.994	0.985	0.0242408
Hmgn2	0.00116941	0.276159	1	0.985	0.0243089
Snrpa	0.00118571	0.265684	1	0.993	0.0245366
Wdr45b	0.00119751	0.27558	0.936	0.794	0.0246698
Ube2n	0.00121289	0.258517	0.988	0.993	0.0248385
Sall2	0.00121651	-0.116018	0.601	0.691	0.0248385
Rrbp1	0.00127487	0.306767	0.994	1	0.0259148
Ppp2r2d	0.00129583	0.290344	0.832	0.728	0.026224
Vegfa	0.0013061	-0.121092	0.613	0.662	0.026224
Polr2a	0.0013072	0.273324	0.96	0.904	0.026224
Akr1a1	0.00131383	0.238569	1	0.993	0.0262424
Chmp4b	0.00132817	0.268463	0.977	0.934	0.0264138
Zfp36	0.00138365	-0.117172	0.497	0.618	0.0273986
Golga7	0.00139962	0.283888	0.919	0.831	0.0275959
Tmem258	0.00141092	0.245115	1	0.993	0.0276567
Rnf114	0.00141474	0.274585	0.624	0.441	0.0276567
Kdelr2	0.00144539	0.277786	0.977	0.912	0.0280257
Tvp23b	0.00144582	-0.102321	0.746	0.824	0.0280257
Nexn	0.00147739	-0.258628	0.636	0.794	0.0285173
Mpp1	0.00149857	0.271762	0.676	0.596	0.0288051
Hist1h2bc	0.00151314	0.406869	0.676	0.551	0.028964
Ewsr1	0.00152623	0.261187	0.994	0.985	0.0290933
Rbm42	0.0015362	0.275899	0.942	0.838	0.0291335
Mdk	0.00154689	0.25214	1	1	0.0291335
Gramd1a	0.00154736	0.259319	0.647	0.426	0.0291335
Stip1	0.00155523	0.290869	0.971	0.934	0.0291488
Aurkaip1	0.00156086	0.262382	0.971	0.971	0.0291488
Mettl9	0.00158397	0.251164	0.988	0.985	0.0294606
Uba1	0.00160208	0.272063	0.948	0.912	0.0296772
Hsph1	0.0016278	0.283388	0.746	0.603	0.0300326
Npepl1	0.00163823	0.25406	0.538	0.353	0.0301041
Clmp	0.00166731	0.317014	0.936	0.919	0.0305114
Ccdc173	0.00167368	-0.188616	0.214	0.375	0.0305114
Cuedc1	0.00170462	0.287342	0.746	0.618	0.0309527
Snrpa1	0.00174813	0.272746	0.983	0.949	0.0316178
Selenok	0.00175759	0.255362	1	0.985	0.0316641
Meaf6	0.00178194	0.283771	0.861	0.721	0.0319006
Lztr1	0.0017846	-0.123238	0.52	0.625	0.0319006
Rab22a	0.00185521	0.270189	0.763	0.574	0.0330342
Loxl1	0.00186372	0.339182	0.636	0.471	0.0330387
Hnrnpa2b1	0.00186984	0.254958	1	1	0.0330387
Rpn2	0.0018801	0.271781	0.977	0.978	0.0330926
Smarcb1	0.00188961	0.274417	0.983	0.904	0.033133
Mxd4	0.00194707	0.300299	0.965	0.978	0.0340108
Ier5	0.00197755	-0.103107	0.896	0.882	0.0344123
Hacd2	0.0019894	0.286426	0.711	0.61	0.0344879
Copg1	0.00202485	0.271726	0.913	0.868	0.0349705
Pdgfra	0.0021221	0.354921	0.919	0.801	0.0363262
Psmb6	0.00212439	0.230765	1	1	0.0363262
Ucp2	0.00213057	0.334036	0.902	0.816	0.0363262
Ptbp1	0.00213498	0.268709	0.965	0.926	0.0363262
Ezr	0.00220053	-0.128394	0.838	0.86	0.0373035
Ndufb8	0.0023375	0.246114	1	0.993	0.0394207
Agfg1	0.00236403	0.270943	0.705	0.574	0.0394207
Ndufv1	0.00236782	0.258769	0.994	0.985	0.0394207
Atic	0.00237266	0.271233	0.879	0.757	0.0394207
Eloc	0.00237331	0.266088	0.983	0.978	0.0394207
Nsg1	0.00237691	0.290378	0.734	0.632	0.0394207
Aprt	0.00241697	0.287966	1	1	0.0399409
Hsp90aa1	0.00242959	0.249724	1	1	0.0400055
Cacfd1	0.0024963	0.254482	0.647	0.478	0.0409571
Fscn1	0.00251705	0.257791	0.988	0.971	0.0411506
Ykt6	0.00256415	0.253214	0.561	0.368	0.041772
Ccdc80	0.00257602	-0.132648	0.925	0.904	0.0417957
Zfp131	0.0025838	0.269552	0.775	0.691	0.0417957
Srprb	0.00259408	0.263268	0.711	0.574	0.0418147
Mrfap1	0.00260495	0.221782	1	1	0.0418268
Hdac1	0.00261304	0.26179	0.948	0.912	0.0418268
Ndufa1	0.00264259	0.261148	0.942	0.949	0.042153
Ddx18	0.00267635	0.258071	0.977	0.949	0.0425438
Ifngr1	0.00271161	0.24568	0.52	0.346	0.0429556
Dpy19l1	0.00275376	0.25503	0.636	0.412	0.0434734
Ank2	0.00276734	0.277062	0.393	0.235	0.0435383
Mrpl12	0.00278136	0.252734	0.994	0.978	0.0436025
Utp14b	0.00279041	0.267368	0.538	0.404	0.0436025
Lman2l	0.00285973	0.24061	0.59	0.368	0.0445342
Hsp90b1	0.00290845	0.361167	1	1	0.0449058
Ddx5	0.00291261	0.224775	1	1	0.0449058
Cops9	0.00291687	0.251501	1	0.978	0.0449058
Arpc2	0.00292937	0.245807	1	1	0.0449058
Eif2s3y	0.00293247	0.276995	0.526	0.331	0.0449058
Cdc37l1	0.00295512	0.258477	0.775	0.654	0.0450699
Arl1	0.0029628	0.250785	1	0.993	0.0450699
Gpx4	0.00298201	0.224311	1	1	0.0452007
Tbce	0.00300176	0.245564	0.647	0.404	0.0452007
Uqcrc1	0.00300471	0.253163	0.994	0.963	0.0452007
Sap18	0.00302193	0.251101	0.977	0.89	0.0452007
Pitpnb	0.00302926	0.260695	0.861	0.779	0.0452007
Col12a1	0.00303965	-0.138607	0.624	0.662	0.0452007
Trib2	0.00304028	0.283888	0.659	0.493	0.0452007
Mfap1b	0.00307909	0.244871	0.642	0.441	0.0456301
Arap1	0.00309189	0.28066	0.734	0.566	0.0456724
Stxbp4	0.00313089	0.243029	0.618	0.375	0.0459381
Calml4	0.00314106	-0.272385	0.665	0.603	0.0459381
Dusp12	0.003142	0.246911	0.682	0.471	0.0459381
Phf23	0.00315471	0.276268	0.798	0.706	0.0459381
Anxa6	0.00316935	0.281828	0.988	0.912	0.0459381
Taf10	0.00316987	0.263342	1	0.978	0.0459381
Ptk7	0.00318241	0.270681	0.89	0.838	0.0459748
Slc35b2	0.00319294	0.269612	0.838	0.713	0.0459823
Mlf2	0.0032741	0.245517	0.988	0.985	0.0469561
Nme1	0.003281	0.268278	1	0.985	0.0469561
Trmt6	0.00330654	0.260504	0.676	0.566	0.0471746
Cops3	0.00331877	0.259093	0.983	0.919	0.0472025
Slx1b	0.00334578	-0.174262	0.22	0.36	0.0474399
Abhd17c	0.00346589	-0.135658	0.422	0.515	0.0489917
Fmnl2	0.00349471	0.259536	0.775	0.647	0.049124
Slc4a1ap	0.00349664	0.250162	0.618	0.537	0.049124
Mrpl52	0.00352719	0.236676	1	1	0.0494022
Nrk	0.00357353	0.321482	0.364	0.176	0.0498991
Cpxm1	0.00360007	0.290413	0.931	0.897	0.0500209
Rpl19	0.00360615	0.105792	1	1	0.0500209
Gm30025	0.00361492	0.256203	0.566	0.434	0.0500209
Rbp1	0.00368616	0.262714	1	0.993	0.0507035
Ccar1	0.00368632	0.242392	0.994	0.971	0.0507035
Specc1	0.00371194	0.268048	0.462	0.279	0.0509035
Ptcd2	0.00374265	0.255342	0.769	0.669	0.0510217
Gm8186	0.00377042	0.263964	0.884	0.779	0.0510217
Mme	0.00377407	-0.216539	0.266	0.382	0.0510217
Ephb4	0.00377539	0.248459	0.578	0.412	0.0510217
Rps29	0.00379541	0.107064	1	1	0.0510217
Coq8b	0.0038081	-0.140095	0.272	0.397	0.0510217
Atp5g3	0.00382148	0.240336	1	1	0.0510217
Neo1	0.00382152	0.262127	0.705	0.61	0.0510217
Twf2	0.00384301	0.257398	0.763	0.647	0.0510217
Med28	0.00384774	0.257758	0.971	0.904	0.0510217
Eif5a	0.00385149	0.245065	1	1	0.0510217
Ywhaq	0.00388063	0.225313	1	1	0.0510217
Fosl2	0.0038808	-0.179152	0.214	0.36	0.0510217
Psmb3	0.00388507	0.254196	0.994	0.978	0.0510217
Col5a2	0.00389094	0.322976	0.855	0.816	0.0510217
Kpna2	0.00389827	0.389912	0.399	0.324	0.0510217
Upf1	0.00391642	0.25406	0.699	0.544	0.0511137
C1qtnf2	0.00394593	0.312225	0.405	0.301	0.051353
Hnrnpm	0.00395754	0.243851	1	0.993	0.0513586
Cope	0.00397199	0.249986	0.971	1	0.0514009
Ifitm2	0.00402876	0.246109	1	1	0.0519891
Smyd3	0.00405489	-0.110098	0.468	0.544	0.0521397
Eif1	0.00406313	0.202418	1	1	0.0521397
Ccndbp1	0.00413622	-0.105786	0.543	0.596	0.0528602
Atp5f1	0.00414625	0.214076	1	0.993	0.0528602
Dnaja1	0.00415379	0.224043	1	1	0.0528602
Gclm	0.00416753	-0.117841	0.688	0.75	0.0528885
Ppp1cc	0.00422088	0.248239	1	0.963	0.0533454
Polr2l	0.00422676	0.262555	0.659	0.544	0.0533454
Rab8a	0.00426376	0.254607	0.879	0.728	0.0536168
Tmem234	0.0042716	0.242397	0.988	1	0.0536168
Nubp1	0.00434794	0.257141	0.803	0.632	0.0544263
Mgst1	0.00436298	-0.117641	0.803	0.838	0.0544661
Ube2g2	0.00444869	0.235802	0.59	0.419	0.0553856
Mmp16	0.00451287	0.238296	0.549	0.404	0.0557897
Zranb2	0.00452247	0.244791	1	1	0.0557897
Snap91	0.00452976	-0.158603	0.647	0.669	0.0557897
Nudcd2	0.00454015	0.251921	0.988	0.941	0.0557897
Atp5a1	0.00455906	0.200841	1	1	0.0557897
Ndufa5	0.00456361	0.249143	1	0.993	0.0557897
Dera	0.00456616	0.259081	0.85	0.713	0.0557897
Psmd8	0.00468019	0.242837	0.988	0.985	0.0570312
Apbb1	0.00471301	0.232204	0.624	0.463	0.0570707
Mars	0.00471808	0.246378	0.728	0.581	0.0570707
Psmd7	0.00472605	0.231447	0.994	1	0.0570707
Itga9	0.00475267	0.330903	0.838	0.779	0.0570707
Mrpl21	0.00475325	0.253992	0.971	0.956	0.0570707
Rreb1	0.00475796	-0.104835	0.462	0.551	0.0570707
Trim28	0.00479772	0.245441	1	0.978	0.0573977
Mat2a	0.00482268	0.27679	0.977	0.978	0.0574853
Iigp1	0.00483007	-0.225485	0.312	0.324	0.0574853
Mthfd2	0.00489897	0.249463	0.572	0.471	0.0581548
Pigp	0.00492862	0.26021	0.884	0.897	0.0583559
Nrd1	0.00494846	0.293886	0.867	0.779	0.0584401
Dnajb4	0.00506063	-0.113166	0.601	0.676	0.0595085
Spcs2	0.00506483	0.231919	1	1	0.0595085
Dtnb	0.00512511	0.254162	0.636	0.449	0.0600631
Arl8b	0.00517578	0.254855	0.723	0.61	0.0603546
Mrpl28	0.00517625	0.251909	0.988	0.956	0.0603546
Tes	0.00522682	0.287118	0.59	0.515	0.0607899
Dynll1	0.00525046	0.244425	1	1	0.0608041
Neat1	0.00525451	-0.280776	0.37	0.39	0.0608041
Fkbp7	0.00531474	0.266111	0.85	0.713	0.0613465
Gdnf	0.00538626	0.284175	0.497	0.301	0.0620162
Cs	0.00543203	0.256163	0.85	0.757	0.0623869
Lrrc59	0.00565674	0.267498	0.931	0.882	0.0647516
Dynlt1a	0.00566612	0.23058	0.561	0.382	0.0647516
Mesd	0.00570248	0.254112	0.908	0.868	0.0649532
Pdk1	0.00571203	-0.10593	0.601	0.654	0.0649532
Fos	0.00577271	-0.159712	0.902	0.941	0.0654811
Ung	0.0059111	0.298058	0.642	0.456	0.0668753
Slc39a7	0.00592474	0.247475	0.936	0.904	0.0668753
Cops6	0.00598516	0.229492	1	0.978	0.0673917
Sumo1	0.00600182	0.225409	1	1	0.067414
Mtus1	0.00602162	-0.140166	0.37	0.397	0.0674715
Cuedc2	0.00620927	0.244667	1	0.941	0.0692615
Ppm1g	0.00621561	0.260139	0.936	0.897	0.0692615
Rbm45	0.0062266	-0.1109	0.382	0.507	0.0692615
Surf4	0.0062944	0.255063	0.884	0.787	0.0694436
Fancl	0.00629705	0.235061	0.503	0.346	0.0694436
Map2k4	0.00629823	0.246594	0.584	0.434	0.0694436
Rpl9-ps6	0.00630344	-0.123912	0.295	0.426	0.0694436
Rgs5	0.00632263	-0.182817	0.376	0.426	0.0694877
Gmeb1	0.00633769	0.252504	0.642	0.515	0.0694877
Rab14	0.00637643	0.229968	1	1	0.069746
Skp1a	0.00639361	0.240229	0.988	0.971	0.0697678
Selenow	0.0064245	0.234738	1	1	0.0699387
Plagl1	0.00664794	0.464222	0.792	0.618	0.0722001
Vdac3	0.0066986	0.230041	1	1	0.0724542
Zfp942	0.00672013	-0.11628	0.341	0.449	0.0724542
Ggt1	0.00672354	-0.269624	0.139	0.346	0.0724542
Igf1	0.00673763	0.481331	0.231	0.074	0.0724542
Fkbp5	0.00675019	0.235446	0.543	0.368	0.0724542
Nacc1	0.00676812	0.255183	0.728	0.588	0.0724773
Bdh2	0.00678698	-0.176921	0.306	0.353	0.0725102
Dzip1	0.00687346	0.232081	0.624	0.493	0.0732637
Ubn1	0.00696974	0.252296	0.954	0.949	0.074118
Zfp638	0.00700727	0.261316	0.936	0.926	0.074345
Atp5j	0.00718038	0.210864	1	1	0.0759037
Selenoo	0.00718722	-0.101246	0.416	0.522	0.0759037
Ndufs3	0.00722839	0.242215	0.983	0.963	0.0761633
Trim35	0.00731121	0.247177	0.977	0.963	0.0768598
Atp1b1	0.00736162	-0.227426	0.41	0.507	0.077213
Fbxo22	0.00741674	0.25169	0.809	0.824	0.0776139
Smarca2	0.00753287	0.25395	0.919	0.831	0.07865
Pik3r1	0.00755004	0.269107	0.85	0.721	0.0786506
Lmod1	0.00762775	-0.259259	0.237	0.331	0.0792803
Crip2	0.00766202	0.317089	0.838	0.779	0.0794567
Lrch3	0.00773838	0.229367	0.601	0.471	0.0800678
Foxd1	0.00787337	0.446364	0.682	0.559	0.0812815
Zfp326	0.00789812	0.256442	0.971	0.912	0.0813541
Cbfb	0.00794468	0.239133	0.682	0.485	0.0816507
Junb	0.00796498	-0.103849	0.855	0.897	0.0816766
Ndfip1	0.00798873	0.229367	0.642	0.471	0.081716
Chmp6	0.00801895	0.240517	0.821	0.647	0.081716
Slc9a3r2	0.00802218	0.263208	0.838	0.713	0.081716
Acot7	0.00807548	0.2599	0.618	0.529	0.0819382
Grb10	0.00807967	0.242002	0.994	0.993	0.0819382
Tor1aip2	0.00813733	0.234163	0.711	0.603	0.0823412
Axin1	0.00820769	0.231474	0.636	0.485	0.0826884
Usp46	0.00823839	0.246612	0.775	0.699	0.0826884
Cnih1	0.00824973	0.247971	0.89	0.853	0.0826884
Ybx1	0.00825055	0.204984	1	1	0.0826884
Psmd6	0.00826164	0.236089	0.988	0.963	0.0826884
Hnrnpu	0.0082942	0.251489	1	1	0.0828338
Calu	0.00838323	0.248306	0.954	0.978	0.0833776
Rassf8	0.00838495	0.230786	0.428	0.272	0.0833776
Fndc4	0.00850486	0.238747	0.676	0.551	0.0843873
Cmtm3	0.00855136	0.252988	0.908	0.801	0.0846659
Nt5c3b	0.00863227	0.244281	0.913	0.809	0.0852831
Tmed9	0.00865698	0.223711	1	0.993	0.0853437
Tchp	0.00868584	0.227234	0.445	0.25	0.0854448
Asf1a	0.00874965	0.250201	0.902	0.853	0.0858887
Serpinf1	0.00880901	0.274358	0.844	0.743	0.086287
Fbxo32	0.00883348	-0.139167	0.26	0.382	0.0863426
Peg3	0.00886809	0.407953	0.983	0.949	0.0864441
Cand1	0.0088815	0.245343	0.832	0.706	0.0864441
Kmt5b	0.00893906	0.24434	0.728	0.596	0.0868204
Prickle3	0.00899732	-0.120836	0.306	0.39	0.08703
Flrt2	0.00899854	-0.147546	0.74	0.743	0.08703
Cpn1	0.00911467	-0.382365	0.162	0.257	0.0879363
Crabp2	0.00913052	0.288721	0.613	0.522	0.0879363
Fnta	0.00919687	0.249625	0.89	0.912	0.08839
Tomm7	0.00922759	0.220355	1	1	0.0885001
Ap1s1	0.00927602	0.23736	0.925	0.904	0.0887792
Zfp398	0.00929712	0.2275	0.538	0.353	0.0887962
Prkag1	0.00948989	0.248697	0.74	0.625	0.0903119
Rbm4b	0.00949513	0.251206	0.884	0.735	0.0903119
Cyb5r3	0.00958626	0.243501	0.931	0.89	0.0909902
Slc50a1	0.00970796	0.247066	0.85	0.765	0.0919476
Camkk2	0.00972715	0.21811	0.555	0.338	0.0919476
Smn1	0.0099594	0.245577	0.913	0.868	0.0939496
Ccdc85b	0.010008	0.242342	0.809	0.721	0.0942145
1810022K09Rik	0.0100513	0.23585	0.983	0.971	0.0944283
Polr3h	0.0103526	0.23227	0.676	0.544	0.0970609
Wbp1	0.0104269	0.242323	0.89	0.809	0.0974698
Rcc1	0.0104386	0.22885	0.653	0.5	0.0974698
Minos1	0.0104619	0.218185	0.988	1	0.0974886
Aes	0.0105412	0.2236	1	1	0.0980292
Smim8	0.0105808	0.231815	0.717	0.596	0.0981988
Ipo9	0.0106793	0.243609	0.757	0.647	0.0988529
Fkbp4	0.0106944	0.219246	1	1	0.0988529
Col26a1	0.010805	0.267107	0.844	0.831	0.0996748
Fryl	0.0108309	0.260254	0.653	0.544	0.0997138
Gpx8	0.0108589	0.24978	0.96	0.934	0.0997717
Gspt1	0.0109012	0.230803	0.988	0.956	0.0999457
Psmb4	0.0109214	0.218265	0.994	0.993	0.0999457
Pdia3	0.0110383	0.231731	0.988	0.985	0.100815
Fdft1	0.0110861	0.223423	0.613	0.449	0.10105
Npr3	0.0111434	-0.155115	0.289	0.368	0.101371
Emp3	0.0111711	0.28419	1	0.993	0.101423
Gtf3c6	0.0112274	0.246289	0.942	0.897	0.101733
Hspd1	0.0113086	0.227553	1	1	0.102267
Fgfr1op	0.0113543	0.225029	0.607	0.485	0.102478
Ash2l	0.011487	0.242537	0.942	0.882	0.103453
Arf4	0.0115194	0.221102	1	0.993	0.103453
Mycbp	0.0115298	0.234974	0.728	0.625	0.103453
Ralgps2	0.0115763	0.239331	0.855	0.75	0.103668
Hook3	0.0116141	0.239588	0.925	0.846	0.103804
Morf4l1	0.011726	0.20963	1	1	0.10444
6030408B16Rik	0.0117307	0.280445	0.676	0.581	0.10444
Ppp4r1	0.0117902	0.227588	0.532	0.382	0.104717
Angptl4	0.0118074	-0.1198	0.295	0.419	0.104717
Lca5	0.0118788	0.220348	0.445	0.301	0.105093
H2-Eb1	0.0118956	0.352254	0.277	0.103	0.105093
Arf2	0.0119609	0.214006	0.561	0.404	0.105262
Lgr4	0.0119812	-0.101192	0.416	0.5	0.105262
Usp12	0.012015	-0.109301	0.376	0.434	0.105262
Fgfbp3	0.012043	-0.120759	0.283	0.375	0.105262
Glmn	0.0120504	0.224453	0.751	0.566	0.105262
Champ1	0.0120717	0.225363	0.595	0.434	0.105262
Spint2	0.0120794	-0.118143	0.532	0.596	0.105262
Mtf1	0.012098	0.210854	0.48	0.279	0.105262
Dhx33	0.0121218	0.222198	0.416	0.243	0.105269
Mfap2	0.0121608	0.285501	1	0.993	0.105409
Exosc4	0.012212	0.241964	0.902	0.809	0.105614
Trp53i11	0.0122304	0.23058	0.538	0.324	0.105614
2410002F23Rik	0.012295	0.23549	0.838	0.75	0.105758
Itga8	0.0123066	0.278847	0.803	0.691	0.105758
Ndufa4	0.0123162	0.219759	1	1	0.105758
Cxcl16	0.0125077	-0.13483	0.283	0.375	0.107202
Tmem184c	0.0125531	0.222936	0.63	0.485	0.107391
Cdc42	0.0126135	0.220628	1	1	0.107707
Uqcc2	0.0126403	0.265113	0.965	0.949	0.107736
Ndufa2	0.012686	0.214736	1	1	0.107925
Zfyve21	0.0127571	0.241274	0.879	0.831	0.108329
Tpgs2	0.0130274	0.224629	0.642	0.485	0.110287
Col3a1	0.0130357	0.349099	1	1	0.110287
Psmc3	0.0131484	0.231869	1	0.993	0.11088
Klk8	0.0131761	0.222333	0.532	0.331	0.11088
Cat	0.0131996	0.241975	0.705	0.574	0.11088
Hccs	0.013226	0.221568	0.41	0.257	0.11088
Letm2	0.0132264	-0.101066	0.358	0.434	0.11088
Fam207a	0.0134148	0.219616	0.601	0.426	0.112254
Dbi	0.0135673	0.258997	0.983	1	0.113324
mt-Nd1	0.0137468	0.250696	1	1	0.11448
Clstn1	0.0137994	0.234872	0.803	0.647	0.11448
Scaf1	0.0138106	0.235965	0.786	0.706	0.11448
Tysnd1	0.0138119	0.221068	0.694	0.566	0.11448
Znrf2	0.0138487	-0.101465	0.353	0.412	0.11448
Bptf	0.0138726	0.23844	1	0.978	0.11448
Ran	0.0138802	0.246953	1	1	0.11448
Ndufa12	0.014029	0.230484	1	1	0.115204
Usp47	0.014029	0.247066	0.809	0.824	0.115204
H19	0.0140431	0.340857	0.994	0.985	0.115204
Pfn1	0.0141107	0.228894	1	1	0.115552
Ube2m	0.0141754	0.22414	1	0.993	0.115601
Serp1	0.0141821	0.232431	0.913	0.853	0.115601
Aplp1	0.0141921	-0.107105	0.445	0.537	0.115601
Tmem115	0.0142745	0.223896	0.711	0.588	0.115983
Arl8a	0.0142896	0.22482	0.647	0.507	0.115983
Galk2	0.0144463	0.230226	0.705	0.64	0.117048
Dcdc2a	0.0145604	-0.358869	0.127	0.228	0.117765
Mrpl41	0.0146448	0.249386	0.85	0.831	0.118239
Ppfibp1	0.0146988	0.236041	0.746	0.581	0.118467
Poldip2	0.014872	0.235314	0.89	0.882	0.119653
Hmgb3	0.0149715	0.25696	0.983	0.978	0.120243
Npnt	0.0150071	-0.21692	0.364	0.412	0.120278
Son	0.01504	0.213979	1	1	0.120278
Rrp9	0.0150772	0.225528	0.682	0.566	0.120278
Snrnp40	0.0150914	0.236643	0.954	0.904	0.120278
Dyrk1a	0.0151111	0.211771	0.601	0.382	0.120278
Mrpl20	0.0151485	0.236489	0.994	0.978	0.120278
Uchl1	0.015169	0.230498	0.538	0.346	0.120278
Esf1	0.0151875	0.246574	0.965	0.971	0.120278
Pnrc2	0.0152252	0.240499	0.855	0.728	0.120278
Mrpl27	0.0152377	0.233938	0.844	0.779	0.120278
Rbm3	0.0153482	0.213985	1	1	0.120942
Klf2	0.0154059	-0.136797	0.457	0.39	0.121189
Ppp6r3	0.0155095	0.23397	0.763	0.618	0.121796
Mrpl3	0.0155692	0.23611	0.844	0.801	0.122056
Nkd1	0.0156024	-0.102694	0.798	0.794	0.122108
Pik3r2	0.0156621	0.219317	0.659	0.588	0.122202
Dpp9	0.0156676	0.226704	0.595	0.493	0.122202
Nceh1	0.0157593	-0.208301	0.208	0.272	0.122542
Nedd9	0.0157645	-0.121229	0.243	0.36	0.122542
Ndufb6	0.0158582	0.224439	0.988	0.963	0.123062
Ruvbl1	0.0159801	0.226816	1	0.993	0.1233
Gpx1	0.0159862	0.259576	0.988	1	0.1233
Srsf3	0.0159956	0.207571	1	1	0.1233
Tmem57	0.0160104	0.2275	0.803	0.691	0.1233
Rfc2	0.0160424	0.256557	0.896	0.86	0.1233
Tsc22d1	0.0160499	0.245627	1	1	0.1233
Uqcrq	0.0161282	0.236342	0.994	0.993	0.123694
Glrx5	0.0162422	0.23238	0.977	0.963	0.124198
Crcp	0.0162661	0.220918	0.532	0.382	0.124198
Oaz2	0.0162749	0.231273	0.879	0.794	0.124198
Thy1	0.0164033	0.326741	0.428	0.324	0.124969
Rmnd5a	0.0164763	0.223325	0.671	0.529	0.125318
Mmp11	0.0169488	0.228437	0.682	0.61	0.128626
Ctnnb1	0.0169791	0.216094	1	1	0.128626
Pa2g4	0.0169952	0.242106	1	0.993	0.128626
Mtmr3	0.0170854	0.209139	0.561	0.375	0.129096
Smarce1	0.0171758	0.216307	1	0.993	0.129566
Acta2	0.0172214	-0.14936	0.936	0.978	0.129697
Arpp19	0.0173876	0.222466	0.988	0.985	0.130734
Actn3	0.017427	-0.155479	0.26	0.294	0.130815
Baz1b	0.0174595	0.255984	0.96	0.941	0.130815
2022-09-04	0.0174838	-0.135645	0.364	0.412	0.130815
B230307C23Rik	0.0175866	-0.101085	0.318	0.412	0.131312
Taf1d	0.0176074	0.230536	0.988	0.971	0.131312
2700038G22Rik	0.0177153	-0.106507	0.306	0.404	0.131903
Scarf2	0.0177575	0.224105	0.74	0.588	0.132003
Gm10093	0.0178077	-0.133807	0.249	0.346	0.132162
Gmppb	0.017876	0.213701	0.457	0.331	0.132354
Pias3	0.0178911	0.202631	0.538	0.331	0.132354
Gnai2	0.0180392	0.22419	1	1	0.133235
Mrps12	0.0181112	0.231497	0.931	0.853	0.133552
Sf3b4	0.0181684	0.251602	0.884	0.809	0.133759
Psma6	0.0183332	0.219147	0.994	0.993	0.134623
Hic1	0.0184086	0.334903	0.734	0.721	0.134623
Mea1	0.0184314	0.231661	0.867	0.779	0.134623
Cnot11	0.0184788	0.213281	0.613	0.441	0.134623
Cct8	0.0184947	0.210184	1	1	0.134623
Anxa2	0.0185183	0.302177	0.977	0.993	0.134623
Ranbp3	0.0185332	0.214174	0.734	0.596	0.134623
Stk40	0.0185367	0.21264	0.578	0.346	0.134623
Chtop	0.0185495	0.233995	0.931	0.882	0.134623
Skiv2l2	0.0186636	0.229698	0.855	0.794	0.135238
Ctnnbip1	0.018695	0.231093	0.965	0.949	0.135252
Hist1h4h	0.0187795	0.262988	0.491	0.36	0.135649
Ndufc1	0.0188182	0.215671	1	0.978	0.135715
Ptms	0.0188894	0.230232	1	1	0.136016
Tex30	0.0189931	0.216122	0.578	0.456	0.136548
Nsdhl	0.0191034	0.253021	0.405	0.294	0.137127
Sf3b5	0.0191897	0.248351	0.983	1	0.137531
Ankrd37	0.0193161	-0.103639	0.434	0.471	0.138219
Mvd	0.0193458	0.20565	0.474	0.324	0.138219
mt-Cytb	0.0194105	0.242135	1	1	0.138465
Nsrp1	0.0194528	0.229367	0.942	0.919	0.138552
Cnp	0.0196806	0.202311	0.509	0.353	0.139958
Zfr	0.0197376	0.231543	0.902	0.809	0.140146
Ocm	0.0198902	-0.221589	0.145	0.235	0.140963
AC160336.1	0.019914	0.25658	0.983	0.919	0.140963
Dchs1	0.0201647	0.221856	0.728	0.647	0.142518
Wdr3	0.0202584	0.219787	0.607	0.522	0.142947
Selenos	0.0202877	0.236556	0.965	0.912	0.142947
Dph3	0.0203982	0.234465	0.913	0.941	0.143506
Lhx1os	0.0206265	-0.219314	0.191	0.265	0.144683
Rnf168	0.0206286	0.217821	0.786	0.654	0.144683
Gm26825	0.0207011	-0.112608	0.277	0.368	0.144835
Chd3	0.0207133	0.245523	0.977	0.985	0.144835
Apoe	0.0207966	0.300319	0.844	0.699	0.145197
Cnn1	0.0210214	-0.356808	0.145	0.25	0.14634
Dynlrb1	0.021024	0.221353	0.994	0.985	0.14634
Col1a1	0.0211461	0.313674	1	0.985	0.146967
Commd7	0.0212355	0.236752	0.827	0.801	0.147366
Fis1	0.0215338	0.220448	0.994	0.993	0.148622
Dhcr24	0.0215551	0.230828	0.382	0.213	0.148622
Tsr3	0.0215756	0.221524	0.821	0.721	0.148622
Serinc1	0.0215912	0.229909	0.942	0.868	0.148622
Dnajc21	0.0216042	0.248559	0.867	0.846	0.148622
Traf2	0.0216107	0.198615	0.486	0.324	0.148622
Ptov1	0.0217673	0.208733	1	1	0.149475
2610524H06Rik	0.0219717	0.231098	0.902	0.882	0.150411
1110008F13Rik	0.0219894	0.232857	0.96	0.941	0.150411
Eif4a3	0.0220018	0.21962	0.983	0.934	0.150411
Dcun1d5	0.0221596	0.229554	0.942	0.941	0.151265
Mdp1	0.022292	0.220787	0.688	0.654	0.151943
2022-09-09	0.0223743	0.225864	0.74	0.603	0.152278
Bcl2l12	0.0224302	0.22288	0.734	0.61	0.152432
Trir	0.0225945	0.234602	0.994	0.978	0.153322
Med6	0.022707	0.201196	0.653	0.515	0.153858
Napa	0.0228305	0.225856	0.971	0.926	0.154467
Oxct1	0.0229269	0.226268	0.994	0.956	0.154891
Slc25a4	0.022988	0.192907	1	1	0.155076
Sparc	0.0231228	0.253795	1	1	0.155624
Gcn1l1	0.0231574	0.23085	0.769	0.706	0.155624
Nono	0.0231708	0.206377	0.994	0.993	0.155624
Aldh7a1	0.0232261	0.220757	0.936	0.824	0.155697
Eif4e	0.0232495	0.22914	0.965	0.934	0.155697
Zfp266	0.0233031	0.219461	0.971	0.926	0.155829
Parl	0.0233873	0.221503	0.867	0.809	0.156137
Npy	0.0234171	-0.257849	0.243	0.221	0.156137
Lsm8	0.0236178	0.241616	0.977	0.941	0.157247
Ltv1	0.0238452	0.220843	0.832	0.691	0.158531
Cox4i2	0.0238991	-0.136737	0.37	0.456	0.158659
Nhs	0.0240187	0.233055	0.48	0.309	0.159119
Ss18	0.0240376	0.222419	0.896	0.75	0.159119
Hnrnpul2	0.0241186	0.247473	0.913	0.89	0.159424
E2f6	0.024175	0.201196	0.538	0.382	0.159424
Glt8d1	0.0241878	0.216015	0.786	0.691	0.159424
Plin2	0.0243216	0.219211	0.809	0.706	0.160077
Cdh6	0.0243925	-0.137304	0.364	0.485	0.160313
B2m	0.0244351	0.22187	0.775	0.713	0.160364
Mcfd2	0.0245321	0.213677	0.717	0.61	0.160771
P3h1	0.0247117	0.225384	0.757	0.618	0.161718
Rnf7	0.0247896	0.219064	0.977	0.993	0.161839
Acp1	0.0248008	0.213735	0.994	0.993	0.161839
Thsd4	0.0248967	0.214839	0.491	0.36	0.162234
Zdhhc16	0.0251008	0.203377	0.63	0.471	0.163333
Msn	0.0251657	0.243872	0.757	0.632	0.163504
Pycrl	0.0252623	0.222648	0.89	0.772	0.163504
Nfatc4	0.025269	0.204606	0.59	0.478	0.163504
Ptp4a3	0.0253515	0.210439	0.497	0.309	0.163504
Dtymk	0.0253569	0.234693	0.965	0.963	0.163504
Ssr3	0.0253789	0.224071	0.971	0.971	0.163504
Sorbs2	0.025418	0.242653	0.526	0.412	0.163504
Timm13	0.0254533	0.218629	1	1	0.163504
Psat1	0.0254586	0.216682	0.642	0.441	0.163504
Dusp6	0.0254896	0.207388	0.491	0.382	0.163504
Kctd5	0.0255186	0.204359	0.665	0.5	0.163504
Etv5	0.0256042	0.205451	0.474	0.353	0.163682
Triap1	0.0256395	0.212343	0.751	0.632	0.163682
Krtcap2	0.0256533	0.21659	1	1	0.163682
Sltm	0.0257681	0.223432	0.988	0.926	0.164118
Ak6	0.0257968	0.249785	0.85	0.772	0.164118
Spock2	0.0258287	0.265343	0.844	0.86	0.164118
Zfp462	0.0259268	0.233681	0.786	0.64	0.164513
Pja1	0.0260617	0.22577	0.925	0.926	0.165141
Metap1	0.0261928	0.209034	0.607	0.544	0.165743
F2r	0.0263303	0.23058	0.763	0.647	0.166384
Polr2i	0.0263836	0.222045	0.971	0.941	0.166492
Cnpy2	0.0265442	0.210642	1	0.993	0.167276
Meis1	0.0266416	0.254604	0.925	0.919	0.16766
Nop58	0.0266838	0.224346	1	0.985	0.167695
Pofut2	0.0267683	0.222073	0.908	0.868	0.167997
Tcf7l1	0.0269434	0.257547	0.827	0.824	0.168865
Trp53bp2	0.0271447	0.212456	0.63	0.463	0.169895
Hmgn1	0.0275498	0.200404	1	1	0.172196
Pgd	0.0276026	0.218015	0.775	0.662	0.172291
Unc5b	0.0277432	-0.138097	0.254	0.338	0.172934
Sdr39u1	0.0278153	0.217196	0.439	0.265	0.172948
Habp4	0.0278208	0.201578	0.451	0.309	0.172948
Setx	0.0278989	0.212202	0.509	0.375	0.173106
Tuba1a	0.0280179	0.289027	0.994	1	0.173106
Set	0.028022	0.20562	1	0.993	0.173106
Mcm4	0.0280239	0.239293	0.821	0.728	0.173106
Mpv17	0.0280374	0.201492	0.665	0.522	0.173106
Zmat5	0.0280723	0.216433	0.803	0.684	0.173106
Gpr180	0.0281113	0.212426	0.676	0.544	0.173114
Celf1	0.0283527	0.234883	0.931	0.875	0.174367
Cpsf3	0.0284759	0.218724	0.757	0.728	0.174891
Clptm1	0.0287272	0.213563	0.723	0.61	0.176199
Cpsf4	0.0288613	0.194999	0.445	0.301	0.176785
Fxyd2	0.0289873	-0.187087	0.462	0.559	0.177269
Lsm12	0.0290471	0.222605	0.983	0.949	0.177269
Pak2	0.0290561	0.223251	0.96	0.926	0.177269
Cfl2	0.029194	0.217746	0.977	0.978	0.177874
Hbp1	0.0293389	0.220885	0.873	0.787	0.17852
Helz	0.0294356	0.236595	0.867	0.765	0.178872
Psmd5	0.0295435	0.211074	0.838	0.713	0.17929
Zfp113	0.0296402	0.198522	0.561	0.382	0.17964
Far1	0.0297841	0.211348	0.682	0.603	0.180061
Sesn3	0.0297881	0.242423	0.832	0.824	0.180061
Hras	0.0298756	0.229993	0.919	0.912	0.180353
Lsg1	0.0300228	0.220452	0.815	0.735	0.181004
Zfp830	0.0300771	0.209182	0.769	0.654	0.181093
Phf5a	0.0302424	0.229498	0.988	0.978	0.18185
Txndc12	0.0303327	0.219291	0.884	0.831	0.182155
Dzip3	0.0304289	0.215814	0.798	0.699	0.182494
Snapc2	0.0305249	0.195736	0.595	0.471	0.182831
Pdia4	0.0305898	0.233711	0.925	0.934	0.182981
S1pr2	0.0307198	0.189908	0.601	0.419	0.18352
Fam220a	0.0309741	0.215601	0.78	0.728	0.184799
Fbxl7	0.0314731	0.283268	0.792	0.765	0.187181
Nckap1	0.0315182	0.231181	0.884	0.794	0.187181
Hist1h2ae	0.031596	0.358012	0.798	0.691	0.187181
Reep3	0.0316086	0.219646	0.931	0.86	0.187181
Tgfb1i1	0.0316447	0.252994	0.85	0.838	0.187181
Meg3	0.0316607	0.333404	0.919	0.934	0.187181
Lpar4	0.0316772	0.181865	0.468	0.338	0.187181
Cavin3	0.0316993	-0.127093	0.682	0.64	0.187181
Arid4b	0.0317692	0.225247	0.983	0.949	0.187278
Bloc1s1	0.0318272	0.19902	0.601	0.529	0.187278
Jak1	0.031838	0.22756	0.948	0.934	0.187278
Slc37a3	0.0319836	0.188124	0.509	0.375	0.187893
Nek6	0.0320262	0.197299	0.532	0.353	0.187904
Fibin	0.0323087	0.32204	0.358	0.309	0.189009
Rad23a	0.0323405	0.208481	0.642	0.515	0.189009
Chrac1	0.0323697	0.217895	0.942	0.904	0.189009
Gadd45g	0.0323792	-0.157367	0.566	0.537	0.189009
Brd3	0.0325189	0.225525	0.983	0.949	0.189583
Rbfox2	0.0325654	0.225084	0.965	0.875	0.189614
Efr3a	0.0327713	0.205965	0.682	0.551	0.190572
Xpo7	0.0329195	0.211675	0.734	0.618	0.191186
Nde1	0.0329602	0.256987	0.821	0.75	0.191186
Gars	0.0330845	0.223736	0.867	0.831	0.191265
Txnl1	0.0330973	0.209178	0.994	1	0.191265
Vps36	0.0330987	0.247031	0.919	0.853	0.191265
Kif12	0.0332391	-0.245131	0.168	0.243	0.191834
Uba6	0.0336974	0.203466	0.561	0.434	0.194236
Rbm6	0.0337437	0.22696	0.85	0.831	0.194259
Adrm1	0.0338335	0.246469	0.936	0.882	0.19448
Mri1	0.0338821	0.2097	0.775	0.559	0.19448
Fmc1	0.0339092	0.225836	0.89	0.846	0.19448
Gsk3a	0.0340949	0.218896	0.717	0.669	0.195302
Uncx	0.0344498	-0.102941	0.942	0.919	0.19704
Erp29	0.0344841	0.199532	1	0.993	0.19704
Csnk2b	0.0346299	0.223052	0.988	0.978	0.197445
Bub3	0.034748	0.263891	0.948	0.904	0.197445
Lsm6	0.0347836	0.237924	0.971	0.971	0.197445
Nkain4	0.034801	0.242537	0.624	0.515	0.197445
Spast	0.0348071	0.214926	0.699	0.596	0.197445
Polg	0.0348128	0.195791	0.543	0.404	0.197445
Rictor	0.0349216	0.20978	0.769	0.574	0.197817
Arhgdib	0.0350181	0.289283	0.289	0.191	0.197939
Tfe3	0.0350292	0.202699	0.451	0.316	0.197939
Timm50	0.0351956	0.219611	0.936	0.89	0.198635
Pspc1	0.0352703	0.218584	0.751	0.743	0.198812
Abi2	0.0353696	0.204948	0.74	0.625	0.199127
Phrf1	0.0355492	0.214354	0.671	0.618	0.199858
Fgfr1	0.0355864	0.240692	0.96	0.934	0.199858
Ctgf	0.0356771	-0.14401	0.197	0.279	0.199884
Cadm1	0.035678	0.249263	0.763	0.684	0.199884
Atp5b	0.0358147	0.179147	1	1	0.200405
Narf	0.0358778	0.205019	0.775	0.684	0.200514
Fn1	0.0360073	0.330324	0.965	0.963	0.200993
Pdzd8	0.0360509	0.209015	0.682	0.529	0.200993
Cmtm4	0.0363249	0.197465	0.526	0.397	0.202275
Panx1	0.0364264	0.193099	0.445	0.309	0.202455
Map1s	0.0364957	0.199249	0.723	0.581	0.202455
Gorasp2	0.036547	0.219345	0.78	0.743	0.202455
Mboat2	0.0365644	0.198931	0.543	0.449	0.202455
Xpo1	0.0365777	0.237348	0.855	0.772	0.202455
Elk4	0.0366729	0.192096	0.509	0.397	0.202507
Fam110b	0.0366953	0.203838	0.636	0.507	0.202507
Manbal	0.0367578	0.214619	0.844	0.743	0.202507
Stmn1	0.0367634	0.223447	1	1	0.202507
Sel1l	0.0368279	0.208314	0.688	0.544	0.202568
Hdac11	0.0368802	0.188749	0.451	0.257	0.202568
Mgme1	0.0369436	0.191836	0.532	0.382	0.202568
Ap3d1	0.0369507	0.212772	0.821	0.691	0.202568
Scmh1	0.0372042	0.202523	0.671	0.588	0.203714
Rnf20	0.0374365	0.220251	0.908	0.824	0.204324
Eno1	0.0375027	0.192377	1	1	0.204324
Zfp777	0.0375028	0.200822	0.439	0.324	0.204324
Ndufb2	0.0375165	0.217954	0.971	0.934	0.204324
Thbs2	0.0375379	-0.180559	0.341	0.456	0.204324
Cacybp	0.0376692	0.221952	0.994	0.985	0.204796
Tsc22d3	0.037789	0.206838	0.757	0.743	0.205028
Nisch	0.0378012	0.208071	1	1	0.205028
Bysl	0.0378648	0.195506	0.532	0.412	0.205131
Mettl16	0.0379786	0.209529	0.832	0.801	0.205302
Yap1	0.0380044	0.20248	0.734	0.618	0.205302
Bcam	0.0380724	0.286494	0.78	0.713	0.205302
Eif1a	0.0380752	0.219866	0.908	0.934	0.205302
Eif3l	0.0381562	0.218461	1	0.993	0.205344
Mfsd5	0.0381724	0.194981	0.497	0.346	0.205344
Cd320	0.0383087	0.210525	0.884	0.868	0.205837
Trove2	0.0385473	0.200097	0.624	0.566	0.206645
Dad1	0.0385492	0.211011	0.994	1	0.206645
Mcrip1	0.0386775	0.212447	0.988	0.985	0.207091
Bcl7b	0.0387859	0.20758	0.746	0.691	0.207221
Mdfi	0.0387919	0.196868	0.543	0.412	0.207221
Ccnh	0.0389248	0.216788	0.809	0.728	0.207518
Dbn1	0.0389847	0.222117	0.931	0.89	0.207518
Tbc1d24	0.0390135	0.18922	0.584	0.441	0.207518
Ift20	0.0390294	0.224625	0.965	0.963	0.207518
Ppil3	0.0390734	0.207692	0.688	0.537	0.207518
Timm17b	0.0391463	0.216234	0.919	0.941	0.207665
Hs3st3b1	0.0392057	-0.158959	0.231	0.287	0.20774
Gm16152	0.0392831	0.267426	0.301	0.066	0.207911
Prkce	0.0396799	0.200868	0.532	0.449	0.209403
H2afy2	0.0396887	0.221716	0.971	0.978	0.209403
Gja1	0.0397017	0.311239	0.59	0.603	0.209403
Fam105a	0.0398343	-0.104996	0.526	0.544	0.209861
Akirin1	0.0399475	0.203443	0.647	0.5	0.210018
Drap1	0.0399661	0.20803	1	0.993	0.210018
Csnk2a2	0.040016	0.215293	0.925	0.897	0.210018
Tmem267	0.0400678	0.230111	0.353	0.169	0.210018
Cep63	0.0401203	0.204049	0.514	0.471	0.210018
Reps1	0.0401384	0.199832	0.671	0.588	0.210018
Akap13	0.0403804	0.234624	0.873	0.824	0.211044
Ipo11	0.0406092	0.201196	0.59	0.419	0.211883
Nbas	0.0406331	0.195365	0.376	0.235	0.211883
Gnb2	0.0411874	0.199147	1	1	0.214529
Commd4	0.0413803	0.213997	0.855	0.794	0.215235
Nkiras2	0.041425	0.199514	0.624	0.559	0.215235
Adamts1	0.0414635	0.229056	0.723	0.61	0.215235
Arhgdia	0.0416902	0.212935	0.994	0.956	0.216168
Metap2	0.0417699	0.196616	1	1	0.216337
Acp6	0.0418405	0.185546	0.497	0.353	0.216349
Hoxc9	0.0418663	0.252313	0.936	0.875	0.216349
Capn10	0.0421136	0.187033	0.48	0.331	0.217382
P3h3	0.0422408	0.235956	0.861	0.779	0.217794
1190002N15Rik	0.0426995	-0.111332	0.549	0.61	0.219873
5430416N02Rik	0.0427582	0.188858	0.618	0.456	0.219873
Fndc5	0.042789	0.242332	0.329	0.294	0.219873
Ppm1m	0.0428354	0.19346	0.636	0.5	0.219873
2810474O19Rik	0.0429096	0.250201	0.936	0.838	0.219999
Mgll	0.0429773	-0.186741	0.312	0.397	0.219999
Synj2bp	0.0430038	0.205773	0.821	0.735	0.219999
Frem1	0.0431924	0.25922	0.746	0.669	0.220658
Rbm12	0.0432392	0.180253	0.474	0.324	0.220658
P4ha2	0.0432789	0.200915	0.647	0.515	0.220658
2310011J03Rik	0.0433246	0.205226	0.723	0.647	0.220658
Ncln	0.0434487	0.192643	0.751	0.566	0.221045
Aars	0.0437413	0.207156	0.59	0.449	0.222287
Hes6	0.0438048	0.204376	0.763	0.654	0.222364
Ints8	0.0438631	0.192109	0.578	0.485	0.222367
Cldn11	0.0439235	-0.214609	0.468	0.596	0.222367
Smim27	0.0439507	0.202653	0.769	0.625	0.222367
Rexo4	0.0440953	0.20758	0.717	0.699	0.222854
H13	0.0442998	0.212968	0.988	0.926	0.223641
Mov10	0.0443832	0.182591	0.457	0.331	0.223649
Ccdc124	0.0443988	0.24206	0.896	0.912	0.223649
Sec24d	0.0451645	0.196011	0.555	0.441	0.227257
Med21	0.0453588	0.210597	0.942	0.897	0.227694
Zfp521	0.0453921	0.196917	0.422	0.301	0.227694
Bag6	0.0454012	0.226286	0.879	0.816	0.227694
Cavin2	0.0454496	-0.229076	0.202	0.294	0.227694
Zfand5	0.0455527	0.209564	0.965	0.934	0.227962
Ufm1	0.0457216	0.212042	0.861	0.772	0.228558
Amigo2	0.0459914	-0.10906	0.208	0.316	0.229657
Tmem119	0.046157	0.18595	0.497	0.331	0.230234
Prkcsh	0.0464401	0.209101	0.936	0.912	0.231372
Kif5b	0.046502	0.209495	1	0.993	0.231372
Tsn	0.0465362	0.199687	1	0.985	0.231372
Erc1	0.0466936	0.209986	0.659	0.588	0.231903
Tusc3	0.0468163	0.216682	0.908	0.86	0.232111
Mfge8	0.0468366	0.237007	0.965	0.897	0.232111
Tcf12	0.0469474	0.216944	0.936	0.941	0.23241
Ahsa1	0.0470186	0.206702	0.977	0.919	0.232512
Snrpd3	0.0471133	0.206591	1	1	0.232729
Ripply2	0.0475508	-0.18686	0.092	0.279	0.234639
Litaf	0.047604	0.217068	0.74	0.691	0.234649
Rpp21	0.047717	0.205757	0.879	0.787	0.234954
Ror2	0.0478603	0.190998	0.405	0.243	0.235407
Uqcr10	0.047975	0.218361	1	1	0.235449
Plce1	0.048001	-0.132804	0.197	0.279	0.235449
Klhdc10	0.0481284	0.208314	0.792	0.706	0.235449
Dlat	0.0481538	0.198658	0.786	0.676	0.235449
Ptprd	0.0482371	0.233743	0.919	0.853	0.235449
Slc25a19	0.0482419	0.199615	0.514	0.412	0.235449
Eftud2	0.0482537	0.227929	0.884	0.846	0.235449
mt-Nd4	0.0482789	0.21774	1	1	0.235449
Epdr1	0.0483932	0.189289	0.41	0.228	0.23575
Bud31	0.0484672	0.205216	0.925	0.838	0.23575
Maea	0.0484946	0.211817	0.861	0.801	0.23575
Psma1	0.0487431	0.204777	0.994	0.978	0.236507
Golm1	0.0487533	0.203744	0.642	0.544	0.236507
AY036118	0.0489532	-0.148263	0.977	0.985	0.236583
Ggps1	0.0490052	0.193696	0.584	0.515	0.236583
Emc8	0.0490256	0.212015	0.948	0.904	0.236583
Irf8	0.0490545	-0.100875	0.266	0.301	0.236583
Ninj1	0.0490629	0.195429	0.59	0.441	0.236583
Ndufs4	0.0491117	0.206479	0.988	0.978	0.236583
Ncbp2	0.0491294	0.210136	0.931	0.919	0.236583
Atg5	0.0492142	0.198184	0.711	0.625	0.236743
Tm9sf3	0.0493538	0.227363	0.965	0.956	0.237167
Arfgap2	0.049497	0.198395	0.844	0.735	0.237372
Hira	0.0495288	0.187229	0.462	0.368	0.237372
Tdp1	0.0495524	0.194951	0.532	0.404	0.237372
Wars	0.0496216	0.194681	0.555	0.456	0.237372
Cinp	0.0497683	0.189726	0.601	0.529	0.237372
Tra2a	0.0497915	0.193539	1	1	0.237372
Cops8	0.0498127	0.202494	0.936	0.89	0.237372
Fam126a	0.0498574	0.187894	0.474	0.368	0.237372
Jtb	0.0498616	0.212018	0.873	0.816	0.237372
Stub1	0.0499693	0.210211	1	0.985	0.237639
Tsc2	0.0502685	0.18535	0.52	0.397	0.238814
Polr3gl	0.0503823	0.201472	0.63	0.537	0.239108
Nmd3	0.0505236	0.202569	0.844	0.706	0.239189
Eif3g	0.0505429	0.20334	0.988	0.993	0.239189
Fam133b	0.0505977	0.213092	0.96	0.956	0.239189
Enc1	0.0506077	0.227049	0.642	0.574	0.239189
Med13l	0.0508778	0.206302	0.728	0.64	0.240219
Emc10	0.0509916	0.206743	0.994	0.963	0.240342
CAAA01118383.1	0.0510086	0.19689	0.671	0.537	0.240342
Gtf2i	0.0512478	0.232581	0.965	0.971	0.241222
Ap2s1	0.0513627	0.206393	0.977	0.971	0.241515
Cherp	0.0514277	0.191568	0.618	0.529	0.241573
Ak2	0.0515393	0.204016	0.994	0.978	0.241573
Msmo1	0.0516528	0.239388	0.41	0.331	0.241573
Eno3	0.0516882	0.194938	0.503	0.39	0.241573
Abhd17a	0.0517299	0.211684	0.931	0.904	0.241573
Aplp2	0.0517893	0.204752	0.971	0.971	0.241573
2610318N02Rik	0.051796	0.1939	0.543	0.419	0.241573
Gfpt1	0.0518284	0.202184	0.728	0.647	0.241573
Cdc6	0.0518482	0.241201	0.353	0.228	0.241573
Defb25	0.0520325	-0.192627	0.266	0.294	0.242129
Ube2f	0.0520898	0.199722	0.723	0.721	0.242129
Klhl13	0.0521256	0.211348	0.584	0.493	0.242129
Kdm3b	0.0521887	0.195891	0.63	0.5	0.242177
Osbpl11	0.0524357	0.195288	0.462	0.301	0.242863
Cdh11	0.0524423	0.235719	0.983	0.993	0.242863
Pmf1	0.0526093	0.242106	0.821	0.699	0.243391
Chd8	0.0527402	0.207808	0.902	0.846	0.243751
Twist1	0.0528925	0.274472	0.48	0.382	0.244101
Mrpl55	0.0529222	0.214398	0.827	0.831	0.244101
Psmc1	0.0534591	0.209011	0.965	0.941	0.24633
Trp53rka	0.0536366	0.178434	0.543	0.456	0.246663
Actg1	0.0536387	0.2189	1	1	0.246663
Hmgcs1	0.0537117	0.237588	0.763	0.618	0.246751
Ctbp1	0.053788	0.20345	0.977	0.978	0.246855
Hdac2	0.0539018	0.201932	0.994	0.985	0.24713
Ddx1	0.054158	0.204745	1	0.985	0.248058
Rrp8	0.0542754	0.197618	0.786	0.632	0.248348
Prpf31	0.0544494	0.203377	0.925	0.838	0.248595
Bmper	0.0544706	0.211348	0.335	0.221	0.248595
Rpl10a	0.0545245	0.108022	1	1	0.248595
Uri1	0.054587	0.208801	0.861	0.831	0.248595
Sec24c	0.0545999	0.200546	0.486	0.412	0.248595
Iqgap2	0.0551882	0.227629	0.474	0.353	0.251024
Ldb2	0.055367	0.255483	0.798	0.743	0.251588
Hist1h4i	0.0554398	0.209433	0.63	0.419	0.251671
Bmyc	0.0556261	0.222061	0.96	0.882	0.252254
Crtap	0.0556782	0.209564	0.855	0.794	0.252254
9430038I01Rik	0.0559387	0.201752	0.636	0.522	0.25314
Gkap1	0.055984	0.209465	0.971	0.89	0.25314
Pea15a	0.0561214	0.194951	0.514	0.404	0.25329
Espn	0.0561273	0.233555	0.821	0.691	0.25329
Safb2	0.0564893	0.215246	0.861	0.757	0.254615
Cpe	0.0565319	0.211348	0.717	0.551	0.254615
Lhfpl2	0.0566678	0.200983	0.74	0.654	0.254685
Lrriq1	0.0568039	-0.132865	0.393	0.419	0.254685
Gabarapl2	0.0568753	0.206422	0.936	0.875	0.254685
Med29	0.056969	0.206838	0.925	0.89	0.254685
U2af2	0.0569757	0.211068	0.965	0.934	0.254685
Pwwp2a	0.0570401	0.196876	0.844	0.691	0.254685
Pxdn	0.0570403	0.205779	0.734	0.699	0.254685
4632415L05Rik	0.0570448	0.182686	0.578	0.463	0.254685
Tmem97	0.0570729	0.205786	0.711	0.559	0.254685
Prrc2a	0.0571422	0.210278	0.988	0.912	0.254685
Sec11a	0.0571572	0.19953	0.994	0.971	0.254685
Vrk3	0.0572862	0.200675	0.665	0.603	0.255012
Ireb2	0.0575485	0.190865	0.728	0.588	0.255798
Tfip11	0.0575741	0.173086	0.538	0.39	0.255798
Ddx52	0.0576744	0.210597	0.827	0.728	0.255996
2900097C17Rik	0.0577365	0.20989	0.936	0.868	0.256025
Mertk	0.0579132	0.208573	0.353	0.162	0.256456
Cct3	0.0579454	0.189856	1	1	0.256456
Cd81	0.0580066	0.207108	1	1	0.25648
Abca3	0.0582726	-0.118419	0.208	0.309	0.257221
Tmtc4	0.0582863	-0.108015	0.462	0.493	0.257221
Mdn1	0.0584876	0.19873	0.584	0.478	0.257645
Sf3a2	0.0584945	0.217751	0.798	0.765	0.257645
Mageh1	0.0587674	0.203094	0.827	0.75	0.258429
Rpp30	0.0587849	0.195098	0.694	0.647	0.258429
Ifrd1	0.0588684	0.188624	0.659	0.603	0.258548
Mrto4	0.0589634	0.213976	0.96	0.904	0.258718
Fip1l1	0.0591331	0.208407	0.971	0.941	0.25921
Dnajc25	0.0591882	0.199675	0.584	0.434	0.25921
Pex5	0.0593674	0.169944	0.52	0.324	0.259747
Hdlbp	0.0595441	0.222847	1	0.985	0.260272
Cfap20	0.0597625	0.205869	0.931	0.919	0.260978
Atp5g2	0.0601379	0.104488	1	1	0.262189
Psmc2	0.060154	0.204734	0.977	0.934	0.262189
Adgrl2	0.0603832	0.240336	0.861	0.772	0.262939
Slirp	0.0604442	0.210253	0.936	0.934	0.262955
Igfbp6	0.0606049	0.268568	0.457	0.404	0.263405
Nrbp1	0.0615183	0.203412	0.902	0.912	0.266114
Prmt1	0.0615349	0.186622	1	1	0.266114
Tubb2b	0.0615413	0.27378	0.867	0.824	0.266114
Reep5	0.0615781	0.213101	0.994	0.956	0.266114
Mrps36	0.0615878	0.20589	0.908	0.926	0.266114
Fkbp9	0.0616047	0.203518	0.838	0.765	0.266114
Snap47	0.0616336	0.207942	0.861	0.809	0.266114
Btf3	0.0617763	0.104861	1	1	0.266262
Kat7	0.061784	0.190331	0.676	0.581	0.266262
Osbpl5	0.061902	0.174681	0.497	0.36	0.266362
Mcm3	0.0619232	0.249547	0.827	0.809	0.266362
Col14a1	0.062063	0.317989	0.705	0.544	0.266714
Amn1	0.062224	0.199959	0.723	0.588	0.267115
Col5a1	0.0622727	0.235998	0.763	0.662	0.267115
Pou2f1	0.0624344	0.18788	0.636	0.485	0.267115
Fkbp8	0.0624547	0.204366	0.983	0.971	0.267115
Nap1l4	0.0624709	0.199825	0.96	0.956	0.267115
Git2	0.0625229	0.206719	0.815	0.728	0.267115
Ism1	0.0626062	0.206877	0.318	0.184	0.267115
Wisp1	0.0626215	0.203007	0.457	0.309	0.267115
Aimp2	0.062794	0.200638	0.861	0.824	0.267602
Mfap5	0.0632007	-0.160071	0.405	0.449	0.269086
Pde7a	0.0633508	0.19196	0.74	0.603	0.269476
Mgat1	0.0635832	0.181584	0.572	0.456	0.269908
Cdkn1c	0.0636111	0.375524	1	1	0.269908
Cdk13	0.0636288	0.199791	0.861	0.743	0.269908
Ubtd1	0.0639176	0.191627	0.676	0.596	0.270633
Ndufa3	0.0639232	0.203225	0.994	1	0.270633
Mvk	0.0640345	0.196423	0.671	0.625	0.270633
Mcmbp	0.0641139	0.193816	0.832	0.721	0.270633
Rbm28	0.0641556	0.210574	0.896	0.838	0.270633
Mrps18c	0.0642056	0.20166	0.931	0.809	0.270633
Marcks	0.0643238	0.238786	1	1	0.270633
Pin1	0.0643714	0.212951	0.983	0.978	0.270633
Borcs6	0.0644872	0.167968	0.526	0.412	0.270633
Flywch2	0.0645585	0.176877	0.526	0.426	0.270633
Mybbp1a	0.0645679	0.230846	0.942	0.89	0.270633
Sorcs2	0.0645952	0.18222	0.364	0.206	0.270633
Cdh2	0.0646215	0.200983	0.821	0.706	0.270633
Urm1	0.0646958	0.18922	0.682	0.61	0.270633
Ubqln2	0.0647674	0.193228	0.815	0.691	0.270633
Jpt1	0.0648337	0.277079	0.994	0.978	0.270633
Dach2	0.064837	-0.101246	0.283	0.375	0.270633
Bnip2	0.06486	0.201919	0.942	0.853	0.270633
Cycs	0.0656137	0.229221	0.965	0.949	0.273529
Zkscan3	0.066116	0.204111	0.855	0.816	0.275374
Azin1	0.0662435	0.185608	0.642	0.544	0.275591
Fam49b	0.0663294	0.204582	0.809	0.757	0.275591
Hnrnpk	0.0663807	0.182108	1	1	0.275591
Yeats4	0.0664081	0.199196	0.948	0.89	0.275591
Magohb	0.0664884	0.200126	0.78	0.684	0.275661
Prmt5	0.0665451	0.206631	0.838	0.728	0.275661
1500011B03Rik	0.0666595	0.17637	0.468	0.375	0.275886
Syngr2	0.0669057	0.177732	0.595	0.419	0.27657
Nudt16l1	0.066966	0.191271	0.78	0.64	0.27657
Ncbp1	0.067045	0.18983	0.734	0.662	0.27657
Yeats2	0.0670893	0.198312	0.896	0.757	0.27657
Ik	0.0671257	0.213716	0.954	0.941	0.27657
Gm9856	0.0673912	0.166485	0.509	0.39	0.277195
Nsd3	0.067398	0.201721	0.832	0.743	0.277195
Fubp1	0.0675551	0.206613	1	1	0.277592
Anapc5	0.06785	0.196314	1	1	0.27845
Fuom	0.0679257	0.19124	0.671	0.588	0.27845
Vps37b	0.0679456	0.175931	0.468	0.368	0.27845
Ctsd	0.0680561	0.200586	0.965	0.971	0.278654
Map4k4	0.0682945	0.216754	0.977	0.949	0.279339
Magoh	0.0683449	0.215082	0.965	0.956	0.279339
Tmod3	0.0684989	0.211985	0.861	0.846	0.279719
Pitpna	0.0686668	0.199722	0.954	0.934	0.280153
Plxna1	0.0687271	0.173517	0.486	0.309	0.280153
Ssr4	0.0688837	0.204644	0.983	0.993	0.280488
Hspa12b	0.0689315	0.174981	0.451	0.324	0.280488
Ttll12	0.0690865	0.176846	0.445	0.346	0.280823
Tmem60	0.069136	0.193177	0.798	0.625	0.280823
Elob	0.0692979	0.200873	1	1	0.28098
Shkbp1	0.0693126	0.192906	0.428	0.36	0.28098
Grk6	0.0693581	0.18922	0.671	0.625	0.28098
Shisa3	0.0695208	0.295722	0.671	0.588	0.281391
Ythdc1	0.06981	0.218747	0.971	0.963	0.282167
Ubald1	0.0698354	0.173717	0.584	0.426	0.282167
Unc50	0.0700433	0.193362	0.838	0.765	0.282758
Rbmx	0.0702321	0.218688	0.936	0.838	0.283272
Dnajc3	0.0704754	0.216261	0.884	0.875	0.283824
Psmd11	0.0704927	0.197068	0.983	0.963	0.283824
Ankrd11	0.0707707	0.194372	1	1	0.284549
Tubb4b	0.0707967	0.295199	0.988	0.941	0.284549
Ssu72	0.070953	0.206243	0.954	0.941	0.284878
Smarcad1	0.0710025	0.198798	0.734	0.787	0.284878
Cop1	0.0710717	0.196791	0.896	0.794	0.284907
Eif3b	0.0712946	0.210905	0.942	0.926	0.285551
Zfp212	0.0716809	0.167998	0.543	0.419	0.286848
Rrp1	0.0720397	0.191676	0.994	0.985	0.288033
Atp5g1	0.0721791	0.202814	1	1	0.28834
Tagln2	0.0723021	0.263891	0.908	0.882	0.28858
Idh2	0.0725857	0.189858	1	1	0.289416
Chpf2	0.0726374	0.170162	0.445	0.324	0.289416
Atf7ip	0.0727612	0.209501	0.832	0.853	0.28965
Tspan3	0.0728222	0.189515	1	0.993	0.28965
4930453N24Rik	0.0729185	0.195245	0.792	0.721	0.289782
Fbxo11	0.073034	0.198363	0.705	0.632	0.28999
Rtn2	0.0732569	-0.105091	0.208	0.279	0.290523
Golgb1	0.0733531	0.21919	0.983	0.941	0.290523
Exoc7	0.0733581	0.194156	0.809	0.765	0.290523
Zfp639	0.0734927	0.192886	0.838	0.713	0.290806
Gpr108	0.0736734	0.174045	0.555	0.463	0.29127
Rwdd4a	0.0744784	0.183564	0.728	0.596	0.294199
Tbl3	0.0747446	0.181811	0.671	0.544	0.294997
Luc7l	0.0749755	0.204606	0.908	0.86	0.295423
Tmem208	0.074981	0.197279	0.902	0.926	0.295423
Rsl1d1	0.075267	0.197555	0.988	0.985	0.296295
Ifnar1	0.0754202	0.179217	0.584	0.463	0.296644
Loxl2	0.0755186	0.222441	0.705	0.691	0.296777
Ndufv2	0.0756369	0.195998	0.994	1	0.296926
1700011H14Rik	0.0756857	-0.282406	0.098	0.191	0.296926
Ttc28	0.0757805	0.265703	0.954	0.934	0.297044
Ap3m1	0.0762878	0.167968	0.561	0.412	0.298778
Qtrt2	0.0763593	0.17255	0.393	0.235	0.298803
Prr7	0.0767668	0.181449	0.382	0.25	0.300142
Ube2d2a	0.0768968	0.200701	0.977	0.963	0.300395
Traf4	0.0770482	0.184033	0.827	0.647	0.30073
Ptges3	0.0775289	0.201604	0.988	0.985	0.302233
Itga6	0.0775649	-0.110959	0.457	0.404	0.302233
Adi1	0.0776886	0.172848	0.497	0.412	0.302459
Olfm1	0.0779684	0.192227	0.59	0.493	0.303291
Itm2c	0.0780827	0.189445	0.983	0.949	0.303479
Men1	0.0782159	0.180993	0.555	0.456	0.30358
Paxbp1	0.078241	0.192055	0.763	0.596	0.30358
Riok1	0.0784665	0.203154	0.873	0.809	0.304199
Tardbp	0.0785348	0.215169	0.954	0.978	0.304207
Tesk1	0.0786335	0.183521	0.688	0.551	0.304332
Adamts12	0.0787475	0.169602	0.497	0.353	0.304517
Rpl7l1	0.0788484	0.199032	0.971	0.941	0.30465
Rtl8b	0.0791859	0.181679	0.659	0.522	0.305697
Prdm5	0.0793299	0.166322	0.572	0.471	0.305996
Apex1	0.0796211	0.20163	0.994	0.978	0.306862
Mgrn1	0.0798201	0.177514	0.584	0.434	0.306913
Calm2	0.079889	0.21732	1	1	0.306913
Ssb	0.0799276	0.19962	1	1	0.306913
Eif5	0.0799629	0.216437	1	1	0.306913
Ubl5	0.0799684	0.202569	0.994	0.993	0.306913
Copb2	0.0802142	0.199713	0.983	0.919	0.30756
B3gat3	0.080271	0.183603	0.763	0.61	0.30756
Tcf20	0.0803672	0.180702	0.636	0.515	0.307672
Rxrb	0.0806099	0.18998	0.763	0.691	0.308061
Spop	0.0807384	0.201707	0.936	0.904	0.308061
Spout1	0.0807503	0.187668	0.763	0.706	0.308061
Sdf2l1	0.0807616	0.181679	0.636	0.529	0.308061
Exosc8	0.0808039	0.196803	0.913	0.868	0.308061
Tusc2	0.0809304	0.175331	0.549	0.426	0.308287
1600014C10Rik	0.0813753	0.184475	0.347	0.213	0.309694
Zfp148	0.0814346	0.205053	0.942	0.941	0.309694
Scube1	0.0815641	-0.121092	0.197	0.243	0.30993
AC161165.6	0.0816964	0.194304	0.318	0.132	0.30999
Ppip5k2	0.0817199	0.181495	0.613	0.493	0.30999
Ccdc102a	0.0817823	0.188359	0.682	0.618	0.30999
Alcam	0.0820178	0.296939	0.983	0.978	0.310626
Tyms	0.0822713	0.258354	0.827	0.765	0.31133
Arf3	0.0823447	0.179105	0.653	0.522	0.311351
Srp9	0.0826369	0.199988	0.988	0.978	0.31203
Agl	0.0826891	0.227659	0.688	0.596	0.31203
Extl2	0.0827281	0.16671	0.376	0.257	0.31203
Il6st	0.0833693	0.196941	0.682	0.662	0.314191
Ckap4	0.0835406	0.20546	0.977	0.971	0.314578
Smg7	0.0837607	0.169303	0.543	0.471	0.315149
Cul7	0.0839107	0.196505	0.694	0.618	0.315439
Qrich1	0.0839751	0.188061	0.769	0.662	0.315439
Sac3d1	0.0842381	0.198324	0.636	0.537	0.316168
1700037H04Rik	0.0844508	0.192121	0.607	0.544	0.316563
Cd59a	0.0845005	0.178737	0.59	0.493	0.316563
Mfap4	0.0845501	0.263958	0.96	0.934	0.316563
Cap1	0.08465	0.187403	0.867	0.794	0.316581
Frem2	0.0847345	-0.105642	0.324	0.375	0.316581
Rce1	0.0847616	0.183998	0.809	0.654	0.316581
Alg10b	0.0850024	0.175427	0.538	0.434	0.317222
Tamm41	0.0851656	0.161456	0.503	0.397	0.317531
Mcm2	0.0852234	0.200456	0.792	0.728	0.317531
Ngly1	0.085414	0.166363	0.607	0.463	0.317984
Zyg11b	0.085633	0.172209	0.584	0.471	0.318541
Dpm3	0.0858636	0.209159	0.994	1	0.31914
Zfp668	0.0859592	0.173608	0.416	0.316	0.319237
Rbm18	0.0861749	0.185031	0.769	0.684	0.31978
Rassf10	0.0865698	-0.129971	0.168	0.243	0.320948
Snhg12	0.0866682	0.208631	0.913	0.875	0.320948
Asxl1	0.0866993	0.183564	0.659	0.559	0.320948
Rab40c	0.0867834	0.174201	0.382	0.257	0.321001
Bola2	0.0869547	0.200335	0.977	0.956	0.321118
Copz2	0.086955	0.205818	0.896	0.875	0.321118
1700020I14Rik	0.0871395	0.196626	0.879	0.816	0.321311
Etv6	0.087147	0.177637	0.399	0.265	0.321311
Prelid3b	0.0873403	0.19144	0.717	0.735	0.321686
Pomk	0.0874034	0.201196	0.318	0.169	0.321686
Usf1	0.0874588	0.178886	0.653	0.625	0.321686
Xist	0.0876925	-0.164488	0.671	0.757	0.322288
Atf4	0.0877826	0.216707	0.942	0.949	0.322361
Usp9x	0.0881094	0.193507	0.873	0.794	0.322718
Tmem161a	0.0881834	0.177666	0.671	0.574	0.322718
Srsf7	0.0882002	0.205252	1	0.993	0.322718
Cenpx	0.08821	0.200546	0.983	0.934	0.322718
Snx6	0.0882312	0.196	0.988	0.956	0.322718
Sar1a	0.0885361	0.193034	0.96	0.89	0.323576
Ccnd2	0.0887549	0.281268	0.994	0.985	0.324118
Rabggtb	0.0888805	0.195489	0.832	0.801	0.324138
Echs1	0.0889489	0.198203	0.977	0.919	0.324138
Syne4	0.0890211	0.186335	0.382	0.272	0.324138
Rcn1	0.0891391	0.216258	0.994	0.978	0.324138
Pdrg1	0.0891951	0.18222	0.838	0.735	0.324138
Csad	0.0892876	0.216227	0.694	0.625	0.324138
Ppa1	0.0892901	0.203532	0.948	0.956	0.324138
Proser1	0.0893923	0.194498	0.775	0.713	0.324138
G3bp1	0.0893956	0.179136	0.994	0.993	0.324138
Eif2b2	0.0896947	0.203198	0.838	0.816	0.324967
H2afz	0.0898365	0.232235	1	1	0.325015
Sp3	0.0898496	0.189289	0.844	0.765	0.325015
Puf60	0.0899593	0.194681	0.994	1	0.325025
Ptges3l	0.0899938	0.176002	0.399	0.243	0.325025
Tor1b	0.0904781	0.18222	0.728	0.632	0.326295
Mtrf1l	0.0904876	0.161555	0.52	0.404	0.326295
Pih1d1	0.0906994	0.194823	0.861	0.824	0.326802
Npm3	0.0909495	0.208487	0.994	0.993	0.327199
Dhx30	0.0909519	0.19333	0.832	0.824	0.327199
Alkbh7	0.0912735	0.185168	0.723	0.618	0.327641
Fam50a	0.0912885	0.190146	0.838	0.801	0.327641
Cox5a	0.0912888	0.217706	1	1	0.327641
Strip1	0.0914299	0.163135	0.486	0.353	0.327891
Ppdpf	0.0915242	0.196896	0.977	1	0.327974
Gtf2h3	0.0916231	0.167649	0.659	0.5	0.328072
Numa1	0.0922273	0.209448	0.861	0.809	0.329978
Cep162	0.0924243	0.163169	0.532	0.346	0.330426
Ssbp3	0.0927512	0.197106	0.96	0.89	0.331337
0610009O20Rik	0.0929386	0.173059	0.624	0.529	0.331748
Zzef1	0.0932306	0.194951	0.526	0.375	0.332532
Vps28	0.0937106	0.195919	0.931	0.882	0.333985
Abcf1	0.0939201	0.197361	1	0.978	0.33436
Casp6	0.0939613	0.18721	0.751	0.699	0.33436
Nedd8	0.0940772	0.186413	1	1	0.334475
Smap1	0.0941393	0.201752	0.96	0.956	0.334475
Col1a2	0.0944813	0.263619	1	1	0.335024
Tmem164	0.0945055	0.161587	0.532	0.382	0.335024
Fam69a	0.0945167	0.161618	0.503	0.375	0.335024
Rnf149	0.0945856	0.191965	0.884	0.824	0.335024
Pip5k1a	0.0947418	0.181717	0.665	0.596	0.335319
Rnaseh2a	0.0955477	0.194816	0.821	0.757	0.337628
Ptrh2	0.0956035	0.199825	0.78	0.721	0.337628
Birc6	0.0957024	0.208314	0.896	0.846	0.337628
Zfp593	0.0957427	0.18438	0.728	0.662	0.337628
Nt5dc2	0.0957849	0.192316	1	1	0.337628
Ncor2	0.0958631	0.190458	0.78	0.684	0.337628
Timm17a	0.0959088	0.199015	0.96	0.949	0.337628
Swi5	0.0960751	0.194039	1	1	0.337955
Mbd3	0.0962976	0.193485	0.994	0.985	0.338478
Pin4	0.0965307	0.192175	0.942	0.89	0.339038
Smarcc2	0.0967336	0.193109	0.792	0.662	0.339491
Smdt1	0.0970003	0.203778	1	1	0.339894
Gfer	0.0970645	0.190289	0.832	0.735	0.339894
Snw1	0.0970911	0.197067	0.994	0.971	0.339894
Alg14	0.0971441	0.163135	0.457	0.346	0.339894
Arf1	0.0972269	0.186529	1	1	0.339924
Mtg2	0.0974342	0.166309	0.601	0.485	0.34039
Fam208a	0.0975849	0.204772	0.751	0.618	0.340657
Isca1	0.0978628	0.181089	0.572	0.544	0.341125
Psma2	0.0978673	0.189343	0.994	0.985	0.341125
Gosr2	0.0980646	0.169426	0.555	0.449	0.341513
Elavl1	0.0981883	0.200964	0.965	0.978	0.341513
Epb41l3	0.0982017	0.164828	0.422	0.265	0.341513
Gm20045	0.0985033	0.176524	0.347	0.221	0.342303
Bcap31	0.098783	0.190924	0.977	0.949	0.342545
Ccnb2	0.0988245	0.269071	0.717	0.596	0.342545
Dbt	0.0989094	0.174156	0.624	0.537	0.342545
Tmem55b	0.0989157	0.174729	0.699	0.596	0.342545
Lypla2	0.0989457	0.172018	0.566	0.441	0.342545
Mta2	0.0991486	0.185756	0.78	0.721	0.342837
Fbrs	0.0991917	0.159791	0.486	0.368	0.342837
Gcat	0.0992542	0.192227	0.659	0.603	0.342837
Fez2	0.0994412	0.181358	0.647	0.493	0.343225
Ankrd39	0.0996718	0.159687	0.474	0.353	0.343763
2022-09-08	0.0998695	0.172848	0.509	0.397	0.344186
Akt1s1	0.100058	0.196273	0.896	0.882	0.34454
Arl16	0.100122	0.166349	0.509	0.471	0.34454
Fam192a	0.100274	0.191949	0.89	0.801	0.344635
Sf3a1	0.1003	0.189864	0.798	0.757	0.344635
Ahsa2	0.100485	0.186535	0.728	0.706	0.345014
Zc3h7b	0.100761	0.19213	0.665	0.566	0.345701
Cenps	0.101281	0.180829	0.543	0.5	0.347174
Pdia5	0.101341	0.161555	0.468	0.338	0.347174
Fzr1	0.101456	0.219553	0.74	0.618	0.347197
Ptn	0.101499	0.304142	0.994	0.985	0.347197
Glis2	0.101617	0.182057	0.497	0.36	0.347342
Xbp1	0.101712	0.209448	0.879	0.824	0.347409
Rad1	0.101958	0.161737	0.555	0.426	0.347929
Sec13	0.102016	0.202345	0.896	0.904	0.347929
Pradc1	0.102387	0.162964	0.382	0.272	0.348937
Dcun1d1	0.103128	0.174385	0.63	0.559	0.351203
Ilvbl	0.103509	0.161951	0.607	0.5	0.352236
Snx4	0.103626	0.178871	0.821	0.706	0.352375
Galnt1	0.103785	0.185882	0.786	0.713	0.352655
Col6a2	0.104006	0.236451	0.861	0.853	0.353145
Tmed10	0.104185	0.197418	1	1	0.353366
Appl2	0.104225	0.157634	0.445	0.265	0.353366
Tubb2a	0.104518	0.201683	0.676	0.551	0.353913
Hist2h2aa1	0.104541	0.190998	0.329	0.206	0.353913
Sema4g	0.104701	0.166519	0.405	0.368	0.354193
Pdlim4	0.104851	0.201842	0.873	0.846	0.354441
4930426D05Rik	0.10498	-0.109134	0.173	0.279	0.354523
Dctd	0.105038	0.170234	0.665	0.471	0.354523
Rcl1	0.105107	0.180024	0.694	0.625	0.354523
Cox6c	0.105376	0.198817	1	1	0.35517
Baz1a	0.105688	0.191909	0.78	0.669	0.355332
Mafb	0.1057	-0.177624	0.497	0.478	0.355332
Mbd1	0.105725	0.167748	0.543	0.441	0.355332
Pet100	0.105733	0.19004	0.919	0.86	0.355332
Casp8ap2	0.105864	0.20359	0.844	0.75	0.35551
Rc3h2	0.106016	0.184246	0.699	0.566	0.355762
Zfp799	0.106795	0.159349	0.405	0.309	0.358113
Phospho2	0.107025	0.159579	0.451	0.287	0.358625
Nr2c2ap	0.107104	0.166392	0.52	0.404	0.358625
Appbp2	0.107678	0.189279	0.85	0.809	0.360286
Adpgk	0.107825	0.164828	0.457	0.294	0.360515
Mxra7	0.10807	0.173595	0.688	0.581	0.361073
Usp15	0.108193	0.182107	0.734	0.64	0.361219
Ccdc25	0.108723	0.185381	0.711	0.625	0.362724
Nfia	0.108905	0.220551	0.838	0.831	0.362856
Tubb6	0.10892	0.218438	0.688	0.625	0.362856
Srpr	0.109212	0.203335	0.861	0.868	0.363219
Brix1	0.109234	0.194469	0.919	0.941	0.363219
Ahcyl1	0.10933	0.185993	0.861	0.787	0.363219
Nipsnap1	0.109414	0.184801	0.757	0.684	0.363219
Ywhaz	0.109465	0.197591	1	0.978	0.363219
Adam19	0.109541	0.164828	0.457	0.353	0.363219
Svil	0.109594	0.21728	0.855	0.838	0.363219
Nectin2	0.109661	0.212255	0.902	0.912	0.363219
Cog4	0.110308	0.171946	0.711	0.64	0.364335
Tk1	0.110389	0.214756	0.578	0.434	0.364335
Cdk10	0.110517	0.161649	0.491	0.382	0.364335
C2cd5	0.110518	0.159791	0.451	0.36	0.364335
Alg8	0.110524	0.163005	0.416	0.294	0.364335
Ncoa5	0.110576	0.163444	0.63	0.522	0.364335
Bloc1s2	0.110692	0.183782	0.763	0.765	0.364335
Ndufab1	0.110792	0.188013	0.994	0.993	0.364335
Hsd11b2	0.110832	0.202325	0.526	0.5	0.364335
Ccdc186	0.110926	0.185072	0.769	0.721	0.364335
Coq7	0.110997	0.195245	0.942	0.949	0.364335
Map3k3	0.111024	0.161033	0.399	0.243	0.364335
Pnp	0.111029	0.169625	0.85	0.735	0.364335
Mns1	0.111425	0.190983	0.474	0.449	0.365373
Cars	0.111592	0.17616	0.526	0.485	0.365503
Tmem214	0.111624	0.180577	0.647	0.537	0.365503
Tmem251	0.111885	0.170338	0.382	0.272	0.366096
Ptpn12	0.112155	0.173127	0.584	0.471	0.366548
E2f8	0.112255	0.171343	0.422	0.316	0.366548
Ndufb4	0.112262	0.1969	0.994	0.985	0.366548
Irf3	0.112406	0.170064	0.653	0.544	0.366625
Pigq	0.112529	0.156822	0.514	0.419	0.366625
Rad17	0.11257	0.17353	0.671	0.618	0.366625
Ccnjl	0.112605	0.173127	0.584	0.463	0.366625
Lamb2	0.11304	0.163277	0.503	0.36	0.367779
Eed	0.113486	0.182334	0.723	0.662	0.368969
Smg6	0.113718	0.197526	0.838	0.728	0.369463
Zmym1	0.114168	0.151405	0.48	0.353	0.369905
Scx	0.114188	0.221587	0.717	0.647	0.369905
Cse1l	0.114192	0.2029	0.78	0.647	0.369905
Znrf1	0.114249	0.177098	0.705	0.618	0.369905
2310009B15Rik	0.114334	0.181803	0.751	0.721	0.369905
Fxr2	0.114337	0.176779	0.734	0.64	0.369905
Slc25a39	0.114478	0.195298	0.977	0.949	0.370101
Trim12c	0.114705	0.188926	0.318	0.162	0.370573
Cish	0.114855	0.168567	0.393	0.25	0.370623
Rbm14	0.114882	0.164828	0.607	0.478	0.370623
P3h4	0.115009	0.189063	0.896	0.868	0.370771
Ano4	0.115113	0.236991	0.266	0.066	0.370807
Spats2l	0.115181	0.227349	0.803	0.787	0.370807
Tmem121	0.115435	0.155439	0.514	0.404	0.371293
Cthrc1	0.115552	-0.134447	0.277	0.287	0.371293
Socs6	0.115574	0.164828	0.584	0.485	0.371293
Lgals1	0.115674	0.232982	1	0.993	0.371354
Rlim	0.115881	0.200999	0.792	0.669	0.371639
Ywhab	0.115925	0.189847	1	1	0.371639
Mettl6	0.116087	0.169866	0.665	0.61	0.371644
Wdr4	0.116088	0.163397	0.561	0.522	0.371644
Nek3	0.116246	0.179217	0.324	0.154	0.371889
Commd10	0.116392	0.161951	0.549	0.522	0.372098
Dnajb14	0.116539	0.18752	0.699	0.662	0.37231
Rpap3	0.116652	0.187062	0.769	0.772	0.37241
Tns3	0.116766	0.19678	0.688	0.625	0.372475
Ndufs2	0.116834	0.184511	1	0.993	0.372475
Kat6a	0.116984	0.183557	0.815	0.691	0.372609
Nme2	0.11709	0.158072	0.457	0.36	0.372609
Raly	0.11712	0.184043	1	1	0.372609
2810001G20Rik	0.117576	0.167492	0.618	0.537	0.373803
Nsmce2	0.117682	0.186717	0.931	0.868	0.37388
Rhou	0.117973	0.182021	0.775	0.684	0.374547
Hoxb9	0.11844	0.198276	0.85	0.794	0.375691
Retreg1	0.118505	-0.120224	0.22	0.228	0.375691
Cfap36	0.118579	0.190368	0.913	0.838	0.375691
Socs4	0.118785	0.157189	0.555	0.434	0.375893
Zfr2	0.118823	-0.100875	0.168	0.272	0.375893
Phip	0.118914	0.197462	0.965	0.963	0.375893
Hells	0.119033	0.210551	0.728	0.706	0.375893
Maoa	0.119103	0.166145	0.711	0.551	0.375893
Tlk2	0.119134	0.17449	0.775	0.596	0.375893
Dusp5	0.119437	-0.117404	0.156	0.257	0.376558
Adamts7	0.119508	0.176002	0.37	0.235	0.376558
Zfp120	0.119839	0.159349	0.399	0.294	0.377342
Rbm8a	0.120127	0.193251	1	0.993	0.377989
Hax1	0.120432	0.18778	0.873	0.794	0.37869
Rab6a	0.120719	0.186893	0.936	0.934	0.379331
Ammecr1	0.121	0.155166	0.514	0.375	0.37987
Shprh	0.12116	0.159114	0.595	0.5	0.37987
Leng1	0.121183	0.163444	0.624	0.537	0.37987
Ptrhd1	0.121221	0.181127	0.676	0.588	0.37987
Fgf10	0.121614	-0.141338	0.133	0.235	0.380675
Nfyc	0.121644	0.1756	0.717	0.566	0.380675
Usp29	0.121903	0.186807	0.387	0.206	0.380975
Mak16	0.121953	0.190998	0.827	0.765	0.380975
Atp11b	0.121988	0.184936	0.63	0.64	0.380975
Flnc	0.122322	0.152537	0.468	0.287	0.381756
Top1	0.122574	0.179511	1	1	0.382286
Lyar	0.122796	0.198306	0.983	0.978	0.382435
Slc2a8	0.122882	0.155876	0.434	0.309	0.382435
Ttc33	0.122946	0.164828	0.613	0.493	0.382435
Ninl	0.122955	0.164828	0.445	0.346	0.382435
Mkl2	0.123275	0.15786	0.434	0.324	0.38317
Thrap3	0.12351	0.20463	0.988	0.971	0.383215
Gfra4	0.123562	0.15686	0.347	0.206	0.383215
Cdr2	0.123772	0.20076	0.301	0.169	0.383215
Memo1	0.123775	0.168595	0.694	0.574	0.383215
Mrpl36	0.12378	0.187446	0.861	0.853	0.383215
Timm8a1	0.12379	0.198244	0.855	0.743	0.383215
Prpf38a	0.1239	0.182573	0.867	0.816	0.383216
Robo2	0.123957	0.247388	0.884	0.853	0.383216
Phtf1	0.12407	0.162	0.578	0.537	0.383307
4933404O12Rik	0.124344	0.22028	0.283	0.096	0.383895
Heatr1	0.124483	0.164828	0.416	0.257	0.384068
Gpc3	0.124631	0.254162	0.994	1	0.384266
Atp6v1c1	0.124722	0.167602	0.59	0.471	0.384286
Piezo2	0.124929	0.187403	0.52	0.36	0.384288
Capn2	0.125011	0.181165	0.884	0.809	0.384288
Agap3	0.125051	0.169224	0.561	0.5	0.384288
1110008P14Rik	0.125072	0.167513	0.63	0.522	0.384288
Kif1b	0.125184	0.187818	0.844	0.765	0.384288
Gdi2	0.125224	0.195659	1	0.993	0.384288
Cdc5l	0.125354	0.184844	0.931	0.926	0.384431
Sema6d	0.125689	0.166822	0.312	0.213	0.385073
Pop4	0.125731	0.162261	0.676	0.529	0.385073
Islr	0.125839	0.20463	0.786	0.706	0.385147
Camk2g	0.126075	0.168539	0.653	0.625	0.385536
Rft1	0.126134	0.148656	0.434	0.331	0.385536
Phykpl	0.126288	0.154466	0.422	0.331	0.385695
Lbhd2	0.126505	0.254208	0.249	0.118	0.385695
Myef2	0.126589	0.222067	0.873	0.779	0.385695
Tmem98	0.126637	0.16948	0.728	0.64	0.385695
Mrpl9	0.126739	0.184437	0.873	0.853	0.385695
Spen	0.126741	0.184246	0.746	0.654	0.385695
Cdc26	0.126774	0.190366	0.977	0.956	0.385695
Psmg3	0.126976	0.176701	0.751	0.713	0.386016
Anks3	0.127119	0.157587	0.578	0.485	0.386016
Tfap4	0.127131	0.156018	0.52	0.471	0.386016
Atg101	0.128308	0.178381	0.786	0.735	0.389332
Aar2	0.128604	0.15167	0.491	0.419	0.389972
Ublcp1	0.129068	0.17245	0.78	0.61	0.391081
Mta3	0.12914	0.165989	0.751	0.603	0.391081
Anapc4	0.12982	0.174248	0.792	0.728	0.39288
F11r	0.130971	0.199062	0.757	0.684	0.396103
Oaf	0.131332	0.207773	0.85	0.801	0.396932
Usp33	0.131654	0.152852	0.549	0.426	0.397395
Vipas39	0.131658	0.154214	0.566	0.412	0.397395
Sec61a1	0.132008	0.196831	0.861	0.772	0.398192
Lum	0.132154	0.336527	0.422	0.346	0.398197
Gpc6	0.132183	0.216175	0.925	0.919	0.398197
Sdc3	0.132592	0.155971	0.422	0.331	0.399053
Pum1	0.132641	0.193024	0.977	0.963	0.399053
Tmem138	0.133071	0.167332	0.653	0.574	0.399999
Cebpg	0.13313	0.177993	0.803	0.684	0.399999
Pole4	0.133343	0.193083	0.861	0.824	0.400376
Myh11	0.133681	-0.225822	0.324	0.301	0.4005
Dact1	0.133699	0.191096	0.607	0.559	0.4005
Blmh	0.13371	0.193023	0.965	0.963	0.4005
Bop1	0.133733	0.163478	0.601	0.507	0.4005
Anapc7	0.13414	0.172026	0.751	0.669	0.401389
Exosc1	0.134204	0.169384	0.717	0.691	0.401389
Zer1	0.134466	0.158804	0.566	0.456	0.401909
Gpsm3	0.13526	0.15989	0.468	0.346	0.40402
Gnb1	0.13566	0.183756	1	0.978	0.404951
Gnai3	0.135749	0.186628	0.925	0.912	0.404955
Psmd12	0.13593	0.183017	0.988	0.985	0.405232
Lrrc41	0.136161	0.166115	0.618	0.559	0.405259
Hs6st2	0.136188	0.173217	0.659	0.515	0.405259
Smc6	0.136204	0.205131	0.977	0.956	0.405259
Cul3	0.136351	0.185332	0.948	0.934	0.405436
Mavs	0.136462	0.162806	0.353	0.176	0.405501
Cwc27	0.1368	0.174812	0.74	0.603	0.406244
Msrb1	0.136979	0.172734	0.815	0.735	0.406511
Ramp2	0.137128	0.209245	0.971	0.934	0.406517
Gatad2a	0.137252	0.18112	0.769	0.713	0.406517
Dnttip1	0.137263	0.182142	0.913	0.868	0.406517
Mapk3	0.137334	0.177816	0.896	0.831	0.406517
Mcrs1	0.137476	0.184409	0.913	0.882	0.406527
Ruvbl2	0.137515	0.194926	0.896	0.853	0.406527
Scamp3	0.137715	0.176567	0.798	0.779	0.40663
Laptm4b	0.137727	0.203295	0.705	0.691	0.40663
Itsn1	0.138232	0.162261	0.647	0.522	0.407558
Mgea5	0.138302	0.170243	0.757	0.654	0.407558
Prpf40a	0.138307	0.195748	0.994	0.993	0.407558
Ogt	0.138447	0.192841	0.965	0.934	0.40771
Pcna	0.138679	0.185789	0.618	0.566	0.408131
Hint1	0.139094	0.180773	1	1	0.409053
Slit2	0.139216	0.180367	0.607	0.515	0.409053
Slc31a2	0.13926	0.155474	0.382	0.272	0.409053
Commd1	0.139646	0.183595	0.971	0.956	0.409926
Mrpl13	0.139784	0.191543	0.954	0.941	0.410069
Piga	0.139936	0.164828	0.353	0.169	0.410253
Zc3h13	0.14006	0.200119	0.988	0.926	0.410347
Akap2	0.140147	0.144589	0.41	0.272	0.410347
Ilk	0.14028	0.213112	0.971	0.963	0.410475
Naxd	0.14053	0.181005	0.954	0.89	0.410584
Gtf2f2	0.14059	0.153813	0.514	0.412	0.410584
Swap70	0.140596	0.148673	0.48	0.397	0.410584
Nop2	0.140771	0.167535	0.613	0.522	0.410584
Gab2	0.140954	0.163044	0.382	0.324	0.410584
Naa35	0.140963	0.188463	0.879	0.838	0.410584
Fam160a2	0.14116	0.163025	0.37	0.301	0.410584
Cdca3	0.14119	0.276054	0.688	0.588	0.410584
Amfr	0.141263	0.154017	0.688	0.5	0.410584
Scrn3	0.141293	-0.108519	0.156	0.243	0.410584
Ercc6l2	0.1413	0.155018	0.618	0.5	0.410584
Lifr	0.141403	0.163409	0.549	0.478	0.410623
Cdc7	0.141531	0.154878	0.48	0.375	0.410736
Vezt	0.141831	0.164828	0.578	0.456	0.411347
Smg9	0.142093	0.156155	0.434	0.287	0.41171
Kif1bp	0.142136	0.159438	0.676	0.566	0.41171
Dnm3os	0.142324	0.175191	0.561	0.485	0.411996
Fh1	0.143336	0.187846	0.931	0.875	0.414665
Gm48898	0.143429	0.209642	0.231	0.132	0.414672
Fam8a1	0.143678	0.160413	0.538	0.463	0.414807
Mks1	0.143747	0.151089	0.364	0.213	0.414807
Cgnl1	0.143818	0.181195	0.682	0.544	0.414807
Bcdin3d	0.143898	0.158002	0.428	0.331	0.414807
Ankrd27	0.144067	0.16671	0.353	0.265	0.414807
Gmds	0.144228	0.163607	0.671	0.588	0.414807
Sft2d1	0.144266	0.148656	0.416	0.301	0.414807
Zfp105	0.144275	0.147129	0.538	0.397	0.414807
Rwdd1	0.144288	0.188031	1	0.985	0.414807
Sqle	0.14456	0.177407	0.561	0.456	0.414865
Larp7	0.144576	0.193578	0.965	0.926	0.414865
Ift122	0.14458	0.152521	0.561	0.449	0.414865
Tbx3	0.144851	0.234787	0.468	0.426	0.415385
2610008E11Rik	0.145046	0.151161	0.566	0.471	0.415683
Zfpm2	0.145173	0.164828	0.301	0.191	0.415787
Mdfic	0.145435	0.161159	0.399	0.257	0.416278
Map2k3	0.146067	0.181692	0.832	0.794	0.417829
Tmem9	0.146358	0.192845	0.919	0.89	0.418171
Tm6sf1	0.146421	-0.110789	0.272	0.309	0.418171
Ftsj3	0.146522	0.186924	0.832	0.779	0.418171
Rhno1	0.146677	0.171301	0.728	0.654	0.418171
Capza1	0.14669	0.179942	0.861	0.816	0.418171
Orc2	0.146733	0.164828	0.63	0.522	0.418171
Pum2	0.147044	0.186061	0.855	0.868	0.418773
Zfc3h1	0.14713	0.157946	0.607	0.485	0.418773
Nup43	0.147285	0.175256	0.757	0.654	0.418773
Faf2	0.147309	0.182303	0.867	0.809	0.418773
Hoxd9	0.147547	0.167791	0.775	0.706	0.419101
Mosmo	0.147607	0.166058	0.711	0.588	0.419101
Hif1a	0.148182	0.193228	0.896	0.853	0.42026
Tmx2	0.14831	0.165893	0.751	0.654	0.42026
Exosc7	0.148317	0.186242	0.954	0.956	0.42026
Ptp4a2	0.148381	0.186242	0.983	0.978	0.42026
Sf3b3	0.148932	0.18435	0.983	0.956	0.421561
Anapc2	0.149494	0.175047	0.832	0.735	0.422182
Raph1	0.149578	0.184128	0.757	0.647	0.422182
Rrm2	0.149625	0.146586	0.665	0.515	0.422182
Tomm5	0.149669	0.185102	1	0.971	0.422182
Pdxdc1	0.149759	0.176701	0.74	0.699	0.422182
Apbb2	0.149894	0.178367	0.63	0.551	0.422182
E130308A19Rik	0.149906	0.173661	0.647	0.5	0.422182
Atg3	0.149978	0.173449	0.711	0.684	0.422182
Tsen15	0.150022	0.179906	0.803	0.779	0.422182
Med8	0.150143	0.180422	0.861	0.831	0.422182
Dusp15	0.150162	-0.16144	0.087	0.221	0.422182
Cpne5	0.150431	0.170526	0.301	0.213	0.42268
Dnajc15	0.15059	0.197236	0.919	0.949	0.422868
Itpk1	0.150993	0.150987	0.451	0.324	0.42374
Snrpc	0.15136	0.192257	0.977	0.963	0.424347
Nsfl1c	0.151394	0.188782	0.954	0.934	0.424347
Fam114a1	0.15169	0.179217	0.659	0.603	0.424917
Trappc4	0.152001	0.181184	0.948	0.912	0.425528
Myh9	0.152277	0.238936	0.832	0.853	0.425777
Cramp1l	0.152364	0.161618	0.486	0.375	0.425777
Copz1	0.152368	0.182649	0.896	0.897	0.425777
Tor2a	0.153243	0.174934	0.821	0.743	0.427961
Ift27	0.153563	0.179987	0.861	0.721	0.428313
Mff	0.153632	0.178074	0.954	0.926	0.428313
Bzw2	0.153687	0.173569	0.983	0.993	0.428313
Hspbp1	0.153831	0.166006	0.647	0.64	0.428313
Sar1b	0.153835	0.178192	0.85	0.846	0.428313
Atp6v0e2	0.153976	0.160945	0.341	0.213	0.428448
5730455P16Rik	0.154425	0.148966	0.618	0.449	0.429186
Plat	0.154428	0.195121	0.85	0.713	0.429186
Nav1	0.154537	0.176936	0.671	0.603	0.429227
Mapk8ip1	0.154916	0.157281	0.705	0.603	0.429847
Dtl	0.154967	0.180253	0.751	0.61	0.429847
Dpm2	0.15504	0.177914	0.775	0.706	0.429847
Ppp2r5d	0.155184	0.172209	0.624	0.581	0.429985
Cib2	0.15551	0.155099	0.63	0.5	0.430628
Arhgef11	0.155819	0.142849	0.41	0.301	0.431219
Gatad1	0.155927	0.178126	0.902	0.882	0.431219
Tufm	0.156005	0.184355	0.809	0.735	0.431219
Esd	0.156154	0.175584	1	0.993	0.431228
App	0.156196	0.210854	1	0.956	0.431228
Ints6	0.156294	0.164828	0.642	0.566	0.431241
Scaf11	0.156412	0.188104	0.994	0.985	0.431306
Ddx6	0.156888	0.184385	0.925	0.86	0.432359
Mcm3ap	0.157353	0.151799	0.468	0.338	0.433254
Wdr43	0.157401	0.187042	0.983	0.963	0.433254
Phpt1	0.157644	0.158058	0.647	0.544	0.433663
Boc	0.158145	0.163201	0.457	0.375	0.43478
Efnb3	0.158321	0.150925	0.364	0.213	0.434998
Sucla2	0.158442	0.180443	0.89	0.824	0.434998
Tmem189	0.158508	0.147129	0.52	0.426	0.434998
Plrg1	0.158747	0.162478	0.786	0.632	0.435245
Lmnb1	0.158788	0.220934	0.965	0.963	0.435245
Urod	0.158914	0.175216	0.879	0.809	0.43533
Fam212a	0.159338	0.169039	0.543	0.5	0.436166
Tdg	0.159408	0.176257	0.861	0.831	0.436166
Ndc80	0.159597	0.22508	0.486	0.434	0.436326
Ppp2r1b	0.159746	0.140322	0.41	0.279	0.436326
Rrs1	0.159864	0.180577	0.78	0.706	0.436326
Ywhae	0.159903	0.168754	1	1	0.436326
Lonp2	0.159942	0.155413	0.624	0.5	0.436326
Zfp618	0.160804	0.194217	0.809	0.735	0.43826
Smim19	0.160995	0.175064	0.751	0.669	0.43826
Ankhd1	0.16104	0.173394	0.769	0.603	0.43826
Sned1	0.161082	0.163025	0.347	0.301	0.43826
Ago3	0.161196	0.13856	0.428	0.294	0.43826
Vcan	0.16134	0.19764	0.994	0.971	0.43826
Cnot6	0.161354	0.203945	0.908	0.86	0.43826
Timm22	0.161414	0.174973	0.913	0.838	0.43826
Ywhag	0.161686	0.176695	0.809	0.772	0.438398
Cyb5b	0.161721	0.167063	0.723	0.647	0.438398
Cdip1	0.161826	0.170728	0.815	0.713	0.438398
Mrpl38	0.161904	0.17928	0.89	0.824	0.438398
Mrps5	0.161982	0.184846	0.936	0.941	0.438398
Tspan9	0.162168	0.156985	0.659	0.522	0.438398
Mrpl46	0.162275	0.166949	0.798	0.684	0.438398
Snapin	0.162339	0.147129	0.624	0.456	0.438398
Nom1	0.162438	0.161608	0.792	0.676	0.438398
Gtf2e2	0.162466	0.174879	0.884	0.838	0.438398
Nudcd1	0.162656	0.149103	0.613	0.456	0.438398
Cad	0.1628	0.163588	0.676	0.566	0.438398
Chtf8	0.162832	0.176257	0.896	0.824	0.438398
Trappc12	0.162844	0.152521	0.538	0.419	0.438398
Zfp385a	0.162896	0.15653	0.636	0.507	0.438398
Bhlhe40	0.163265	-0.100875	0.162	0.25	0.439133
Cdyl	0.164162	0.160772	0.607	0.529	0.441287
Trmt11	0.164516	0.140846	0.543	0.39	0.44198
Adgrl1	0.164902	0.173517	0.832	0.743	0.442533
Pear1	0.164914	0.151035	0.549	0.434	0.442533
Tbcb	0.165032	0.184507	0.971	0.963	0.44259
Has2	0.165138	0.146418	0.364	0.257	0.442616
Sh3gl1	0.165254	0.167845	0.763	0.691	0.442669
Nab2	0.165833	0.17424	0.688	0.632	0.443961
Gatad2b	0.165979	0.18799	0.902	0.809	0.444092
AI314180	0.1661	0.173014	0.815	0.779	0.444159
Fbln2	0.166506	0.232763	0.225	0.066	0.444851
Nasp	0.166553	0.212343	0.983	0.963	0.444851
Sumo3	0.166699	0.180393	0.983	0.956	0.444983
Farsb	0.167124	0.174307	0.809	0.721	0.445746
Ppih	0.167179	0.181739	0.855	0.824	0.445746
Ndufs8	0.167689	0.187458	0.977	0.963	0.446326
Zfp606	0.167753	0.15586	0.538	0.426	0.446326
Tbc1d10a	0.167875	0.147552	0.59	0.478	0.446326
Foxk2	0.168001	0.154676	0.468	0.338	0.446326
Sulf2	0.168171	0.214635	0.734	0.699	0.446326
Taf1	0.168173	0.173232	0.728	0.721	0.446326
Nt5c	0.168176	0.163763	0.792	0.64	0.446326
Sh3pxd2b	0.168239	0.145381	0.52	0.441	0.446326
Ap1g1	0.168271	0.159565	0.63	0.551	0.446326
Rps27	0.168585	0.166703	1	1	0.4469
Tshz2	0.16872	0.193264	0.994	0.993	0.447
Josd2	0.168884	0.173427	0.867	0.779	0.447177
Serf2	0.169524	0.19369	1	1	0.448614
Dcn	0.169664	0.286867	0.78	0.721	0.448726
Pop7	0.170184	0.169676	0.809	0.735	0.449354
Tpd52l1	0.170225	0.163291	0.451	0.382	0.449354
Usp39	0.170411	0.157448	0.647	0.566	0.449354
Cdca2	0.170517	0.224997	0.451	0.382	0.449354
Anapc10	0.170572	0.165943	0.751	0.691	0.449354
Sirt4	0.170573	0.154676	0.324	0.199	0.449354
Ebp	0.170586	0.158519	0.618	0.544	0.449354
Paip2	0.170785	0.180367	0.994	1	0.449409
Cdc42ep4	0.170855	0.162115	0.584	0.544	0.449409
Gon4l	0.1709	0.179934	0.873	0.846	0.449409
Ap1b1	0.171061	0.146479	0.52	0.471	0.449574
Nipbl	0.171275	0.192487	0.994	0.971	0.449878
Ralgds	0.171423	0.140479	0.439	0.316	0.450011
Specc1l	0.171556	0.157224	0.682	0.574	0.450056
Smoc2	0.171729	-0.132488	0.434	0.382	0.450056
Fzd3	0.171735	0.174307	0.757	0.706	0.450056
Hnrnpf	0.17196	0.174656	1	1	0.450277
Sh3bgrl3	0.172102	0.198648	0.977	0.963	0.450277
Pfdn1	0.172201	0.179336	0.994	0.978	0.450277
Smg8	0.172211	0.160755	0.318	0.176	0.450277
Pamr1	0.172574	-0.132423	0.116	0.221	0.450969
Mcph1	0.172844	0.145445	0.445	0.331	0.451419
Antxr1	0.173088	0.151035	0.52	0.426	0.4518
Tmod2	0.17334	0.153813	0.462	0.324	0.452199
Ehd2	0.173924	0.147315	0.41	0.272	0.453438
Gstm2	0.174064	0.222936	0.717	0.743	0.453438
Epm2aip1	0.174111	0.168167	0.665	0.676	0.453438
Baiap2l1	0.174262	0.148828	0.376	0.309	0.453499
Tradd	0.17434	0.140596	0.416	0.294	0.453499
Mettl1	0.174513	0.184607	0.908	0.882	0.453499
Gtf2a1	0.174627	0.150907	0.462	0.397	0.453499
Rpf1	0.174628	0.170763	0.803	0.743	0.453499
Atp9b	0.174734	0.14604	0.457	0.338	0.45352
Rnf25	0.174987	0.150388	0.387	0.331	0.453919
Ftl1	0.175447	0.102344	1	1	0.4544
Rps6ka2	0.17547	0.149734	0.382	0.243	0.4544
Phldb1	0.175634	0.140731	0.451	0.316	0.4544
Lpar6	0.175653	0.154753	0.659	0.588	0.4544
Slc39a1	0.175667	0.143583	0.532	0.426	0.4544
Cd248	0.175834	0.198582	0.711	0.647	0.454577
Ethe1	0.17597	0.169545	0.671	0.581	0.454645
Parg	0.17608	0.159841	0.659	0.632	0.454645
Rb1cc1	0.176272	0.170064	0.908	0.926	0.454645
Rab11b	0.176341	0.185075	0.948	0.89	0.454645
Mxd1	0.17643	0.152852	0.324	0.199	0.454645
Tmcc1	0.176722	0.163809	0.769	0.713	0.454645
Ppwd1	0.176765	0.174472	0.786	0.662	0.454645
Adamtsl1	0.176803	0.150842	0.497	0.404	0.454645
Ctxn1	0.176804	0.18702	0.977	0.963	0.454645
Kif20b	0.176851	0.254441	0.532	0.544	0.454645
Wipi2	0.176967	0.158793	0.688	0.647	0.45469
Orai1	0.177162	0.14604	0.451	0.324	0.454936
Crym	0.177433	0.24218	0.751	0.691	0.455378
Thap12	0.177648	0.169287	0.855	0.801	0.455675
Etfa	0.177815	0.182515	0.896	0.846	0.45585
Eif2ak2	0.178099	0.144148	0.526	0.449	0.456322
Mul1	0.178356	0.145724	0.584	0.493	0.456728
Akr7a5	0.178464	0.189574	0.965	0.949	0.456748
1110038F14Rik	0.178725	0.182331	0.948	0.912	0.456996
Rnf167	0.178779	0.156307	0.717	0.603	0.456996
Ufsp2	0.178898	0.171417	0.792	0.765	0.456996
Mob1b	0.179045	0.138118	0.526	0.426	0.456996
Accs	0.179058	0.175001	0.295	0.169	0.456996
Arl2bp	0.179309	0.161207	0.925	0.816	0.457383
Lsm2	0.17964	0.2021	0.977	0.949	0.457971
Sirt7	0.180194	0.141572	0.376	0.243	0.45913
2610002M06Rik	0.180433	0.140614	0.532	0.419	0.459332
Pole3	0.180542	0.178541	0.936	0.846	0.459332
Vps52	0.180661	0.143672	0.486	0.404	0.459332
Cdh16	0.180692	-0.196962	0.168	0.228	0.459332
Gnaz	0.180773	0.166871	0.295	0.162	0.459332
Akr1b10	0.180876	0.13724	0.457	0.309	0.459339
Phf8	0.181116	0.149561	0.358	0.25	0.459694
Gm11361	0.181311	0.188821	0.272	0.11	0.459936
Rhoa	0.181442	0.176096	1	0.993	0.460014
Ube2e1	0.181545	0.175248	0.948	0.882	0.460021
Knstrn	0.181773	0.212838	0.705	0.647	0.460093
Dlgap4	0.181774	0.175757	0.827	0.779	0.460093
Isg20l2	0.182117	0.146479	0.52	0.426	0.460131
2022-09-06	0.182159	0.149561	0.671	0.574	0.460131
Mecom	0.182171	0.266346	0.543	0.493	0.460131
Cox10	0.182452	0.144828	0.457	0.36	0.460131
Jagn1	0.182472	0.169287	0.827	0.809	0.460131
Rhod	0.182649	0.16096	0.694	0.566	0.460131
Zfp281	0.182925	0.145724	0.549	0.478	0.460131
Chd4	0.182939	0.191606	1	1	0.460131
Rsf1	0.182944	0.201196	0.919	0.941	0.460131
Mrpl4	0.182972	0.175663	0.873	0.868	0.460131
Mthfd1	0.183122	0.162356	0.584	0.588	0.460131
Anp32a	0.183214	0.182071	1	1	0.460131
Mtch1	0.183253	0.17826	1	0.993	0.460131
Chaf1a	0.183279	0.187229	0.624	0.581	0.460131
Hist1h3c	0.183406	0.166363	0.422	0.338	0.460131
Dock11	0.183424	0.168742	0.318	0.184	0.460131
Tsnax	0.183517	0.166519	0.896	0.743	0.460131
Nup188	0.183592	0.159257	0.555	0.515	0.460131
Ammecr1l	0.183942	0.161104	0.671	0.574	0.460537
Cd34	0.18408	0.200735	0.249	0.125	0.460537
Dhdds	0.184152	0.141773	0.618	0.456	0.460537
Sel1l3	0.184355	0.137523	0.416	0.294	0.460537
Bahcc1	0.18439	0.141944	0.526	0.441	0.460537
Ddx28	0.18445	0.139382	0.48	0.36	0.460537
Lta4h	0.184817	0.175245	0.827	0.824	0.460537
Peli1	0.184861	0.170545	0.861	0.757	0.460537
Efna4	0.184944	0.165928	0.723	0.625	0.460537
Cst3	0.184946	0.183621	1	1	0.460537
Nubp2	0.185123	0.138597	0.503	0.39	0.460537
Card19	0.185211	0.142152	0.59	0.382	0.460537
Efs	0.185227	0.164828	0.532	0.478	0.460537
Sertad4	0.185247	0.153708	0.462	0.382	0.460537
Zfp84	0.185257	0.14604	0.457	0.331	0.460537
Actl6a	0.185922	0.180932	0.948	0.926	0.461281
Tmbim1	0.185938	0.147537	0.37	0.235	0.461281
Mapk6	0.185975	0.146479	0.532	0.449	0.461281
Rnf166	0.186015	0.149561	0.503	0.434	0.461281
Ccz1	0.186059	0.17063	0.884	0.809	0.461281
Ttyh3	0.187234	0.167019	0.769	0.647	0.463945
Atp6v1b2	0.187394	0.156116	0.642	0.61	0.46409
Nav3	0.188475	0.218174	0.486	0.456	0.46647
Dalrd3	0.188558	0.142356	0.601	0.478	0.46647
Slc4a2	0.188729	0.145554	0.549	0.456	0.466631
Sfrp1	0.188948	0.235623	0.942	0.941	0.466631
Strap	0.189017	0.177755	0.965	0.978	0.466631
Pnn	0.189086	0.166172	1	1	0.466631
Zbtb11	0.189147	0.13639	0.514	0.397	0.466631
Rmdn2	0.189232	0.148435	0.318	0.184	0.466631
Ofd1	0.189344	0.1497	0.526	0.419	0.466655
Rnf19a	0.189706	0.141944	0.532	0.434	0.467069
Tars	0.189723	0.167827	0.809	0.713	0.467069
Ckap5	0.189863	0.18922	0.884	0.801	0.467069
Commd9	0.189918	0.156722	0.728	0.625	0.467069
Clk1	0.190231	0.187818	0.971	0.949	0.467186
Polr3k	0.190296	0.170154	0.884	0.831	0.467186
Dohh	0.190344	0.16761	0.827	0.765	0.467186
Gjc1	0.190373	0.186031	0.902	0.897	0.467186
Nespas	0.190736	0.144209	0.457	0.338	0.467827
Ugp2	0.191137	0.166648	0.809	0.757	0.468562
Atrip	0.191564	0.135642	0.509	0.338	0.46893
A630089N07Rik	0.191602	0.145554	0.52	0.412	0.46893
Fbxw4	0.191624	0.14604	0.434	0.331	0.46893
Gpx7	0.191696	0.18331	0.85	0.824	0.46893
Yrdc	0.191923	0.148945	0.728	0.559	0.469081
Txndc5	0.191968	0.175156	0.965	0.919	0.469081
H2afv	0.192109	0.189422	1	1	0.469081
Pan3	0.192222	0.152313	0.699	0.596	0.469081
Kazn	0.192354	0.143088	0.41	0.272	0.469081
Cpsf2	0.192451	0.169335	0.827	0.735	0.469081
Mrpl32	0.192472	0.170126	0.931	0.838	0.469081
Dhx16	0.192683	0.141944	0.532	0.434	0.469344
Sra1	0.192801	0.174479	0.96	0.904	0.469384
Sft2d3	0.193093	0.145891	0.555	0.456	0.469846
Sfrp2	0.193307	-0.112239	0.647	0.757	0.469914
Eif4ebp2	0.193326	0.176306	0.902	0.882	0.469914
Abhd8	0.193686	0.154676	0.746	0.691	0.470541
Rtkn	0.193836	0.136815	0.422	0.243	0.470657
Crk	0.194009	0.159841	0.815	0.706	0.470829
Pkmyt1	0.194183	0.161033	0.324	0.191	0.471001
Vta1	0.194473	0.171307	0.844	0.787	0.471022
Stx6	0.194512	0.173562	0.688	0.647	0.471022
Rapgef1	0.194551	0.140223	0.422	0.36	0.471022
Flywch1	0.194635	0.160374	0.728	0.684	0.471022
Mmab	0.194704	0.13912	0.451	0.353	0.471022
Haghl	0.194958	0.156778	0.751	0.64	0.471388
Zeb1	0.195196	0.196189	0.879	0.787	0.471664
Plk1	0.195278	0.277231	0.439	0.39	0.471664
Med20	0.195586	0.141733	0.514	0.456	0.472161
Blcap	0.196403	0.133478	0.532	0.426	0.473885
Abcb8	0.19665	0.134353	0.538	0.426	0.474231
4932422M17Rik	0.197035	0.147129	0.335	0.213	0.474495
Tacc3	0.19707	0.225401	0.624	0.551	0.474495
Lrrc14	0.197201	0.146684	0.584	0.522	0.474495
Arfip2	0.197253	0.159811	0.809	0.735	0.474495
Snrpb	0.197282	0.179531	1	1	0.474495
Zfp612	0.197469	0.138853	0.462	0.338	0.474495
Eml4	0.197483	0.196055	0.942	0.904	0.474495
Zfp467	0.197717	0.164828	0.624	0.515	0.474811
G3bp2	0.197994	0.179808	0.983	0.956	0.47506
Cggbp1	0.198028	0.170424	0.96	0.882	0.47506
Hsbp1	0.198177	0.190197	1	0.985	0.475075
Tgfbr1	0.198314	0.144544	0.642	0.5	0.475075
Hist1h2bj	0.198387	0.185106	0.301	0.228	0.475075
Adam10	0.198448	0.166679	0.827	0.721	0.475075
Mpp6	0.198614	0.206877	0.971	0.971	0.475225
Rgs10	0.198722	0.160755	0.283	0.162	0.475236
Sec22b	0.198979	0.163939	0.884	0.801	0.475236
Hbb-bs	0.199063	0.162756	0.312	0.162	0.475236
Smchd1	0.199115	0.175945	0.942	0.89	0.475236
Pip5k1c	0.199135	0.139349	0.514	0.434	0.475236
Rpl31	0.19939	0.112565	1	1	0.475596
Rsl24d1	0.19979	0.168277	0.867	0.801	0.476081
Cyc1	0.199801	0.178074	0.988	0.978	0.476081
Pced1a	0.199917	0.166897	0.295	0.169	0.476112
Dctn2	0.200151	0.172678	0.988	0.993	0.476421
Wdfy3	0.200342	0.158922	0.711	0.574	0.476444
Taf7	0.200462	0.166787	0.775	0.765	0.476444
Clk4	0.200573	0.157046	0.74	0.618	0.476444
Ndufs6	0.200575	0.181421	0.994	0.993	0.476444
Cpb2	0.201146	-0.26158	0.069	0.147	0.47665
2010320M18Rik	0.201222	0.159085	0.723	0.669	0.47665
Yif1b	0.201262	0.18063	0.936	0.919	0.47665
Kansl2	0.201493	0.166731	0.838	0.794	0.47665
Bms1	0.20151	0.200519	0.838	0.794	0.47665
Cebpz	0.201535	0.177138	0.96	0.912	0.47665
Sumo2	0.20157	0.167733	1	1	0.47665
Cul1	0.201615	0.173263	0.988	0.985	0.47665
Atxn7l3b	0.201769	0.168533	1	1	0.47665
Sdc1	0.201802	0.148966	0.549	0.419	0.47665
Ltbp3	0.201803	0.143686	0.647	0.537	0.47665
Thumpd1	0.202687	0.165772	0.821	0.779	0.477676
Fuz	0.202701	0.132812	0.48	0.382	0.477676
Ncbp3	0.202783	0.157761	0.711	0.632	0.477676
Hnrnpdl	0.202848	0.188054	1	0.993	0.477676
Adamts5	0.20296	0.206071	0.335	0.184	0.477676
Tfam	0.202996	0.169602	0.884	0.824	0.477676
Ears2	0.203031	0.134057	0.445	0.301	0.477676
Psmc4	0.203069	0.180085	0.983	0.978	0.477676
Wdr1	0.203644	0.171249	0.85	0.794	0.478448
Ptpra	0.203695	0.169512	0.925	0.86	0.478448
Fam122a	0.20371	0.156369	0.688	0.596	0.478448
A430106G13Rik	0.204161	0.173025	0.306	0.125	0.47903
Sdhaf1	0.204255	0.170626	0.786	0.772	0.47903
Psmc5	0.204271	0.17308	0.994	0.993	0.47903
Cdc42bpb	0.204453	0.153655	0.549	0.522	0.479213
Pdcd5	0.204636	0.181543	1	0.993	0.47931
Klhl7	0.204719	0.145517	0.613	0.507	0.47931
Setd7	0.204808	0.133755	0.439	0.331	0.47931
Slc22a17	0.204996	0.166067	0.63	0.551	0.479418
Runx1t1	0.205062	0.206676	0.243	0.14	0.479418
Mtfr1l	0.205713	0.163091	0.884	0.779	0.480504
Eif1ad	0.205736	0.170763	0.746	0.713	0.480504
Dnajb2	0.206097	0.135208	0.549	0.426	0.48102
Tspan31	0.206293	0.171547	0.89	0.868	0.48102
Bgn	0.206332	0.20685	0.942	0.963	0.48102
Pxn	0.206376	0.131931	0.491	0.375	0.48102
Armcx5	0.206559	0.145026	0.48	0.346	0.481204
Ccdc86	0.20669	0.162933	0.803	0.743	0.481265
Mccc1	0.206937	0.134369	0.462	0.346	0.481367
Pus3	0.207108	0.14291	0.647	0.559	0.481367
B4galt5	0.207114	0.162781	0.312	0.176	0.481367
Atxn1l	0.207153	0.145258	0.335	0.243	0.481367
Paf1	0.207392	0.1606	0.751	0.728	0.481403
Rprd1b	0.207396	0.160546	0.705	0.654	0.481403
Erg28	0.207483	0.169921	0.902	0.897	0.481403
Ncl	0.207846	0.198584	1	1	0.481804
Nop56	0.207866	0.184586	0.983	0.971	0.481804
Gins3	0.20822	0.149018	0.312	0.221	0.482381
Ppif	0.208439	0.153839	0.566	0.5	0.482645
Mical3	0.208639	0.146983	0.59	0.529	0.482866
Dynll2	0.20883	0.17966	0.942	0.897	0.483065
Chn2	0.209201	0.151539	0.41	0.338	0.483484
Itpa	0.209222	0.16906	0.873	0.772	0.483484
Rai1	0.209505	0.148687	0.532	0.449	0.483895
Cul2	0.209696	0.147272	0.613	0.559	0.484092
Aimp1	0.210123	0.180399	1	1	0.484152
Cacnb1	0.210303	0.131525	0.358	0.235	0.484152
Josd1	0.210411	0.148161	0.601	0.507	0.484152
Sec24b	0.210479	0.146835	0.59	0.551	0.484152
Stox2	0.210538	0.167409	0.595	0.588	0.484152
Slc7a1	0.210571	0.141914	0.457	0.375	0.484152
Ddx56	0.21062	0.158049	0.711	0.618	0.484152
Zbtb17	0.21073	0.143551	0.387	0.301	0.484152
Per3	0.210754	0.137322	0.376	0.213	0.484152
[truncated: 2,604 more rows]

## Sheet: Tub_progenitors2.MutVsCTRL.DEGs
Gene	p_val	avg_logFC	pct.1	pct.2	p_val_adj
Rpl29	9.81086e-62	-0.388244	1	1	3.03941e-58
Rplp0	3.5026e-53	-0.143551	1	1	5.42552e-50
Rpl21	7.88785e-46	-0.113908	1	1	8.14552e-43
Uba52	2.66164e-39	0.527936	1	1	2.06144e-36
Rps2	5.89595e-31	0.303025	1	1	3.65313e-28
Rps18	4.24727e-29	-0.167297	1	1	2.19301e-26
Eif3j1	2.20907e-27	0.703225	0.95	0.688	9.77671e-25
Gm10260	2.1698e-26	1.87996	0.559	0.035	8.40255e-24
Tpm3-rs7	3.62756e-25	0.722346	0.745	0.206	1.24869e-22
Gm10076	2.6816e-16	0.433873	0.988	0.979	8.30761e-14
Pebp1	5.21398e-14	0.281856	1	1	1.46845e-11
Hspa8	2.27787e-13	0.275363	1	1	5.88069e-11
Il11ra1	3.73933e-13	0.521993	0.72	0.433	8.91111e-11
Alad	4.26057e-13	-0.355299	0.733	0.851	9.42803e-11
Pttg1	6.64949e-13	0.618961	0.752	0.624	1.37334e-10
Eif3j2	7.15641e-12	-0.37127	0.435	0.738	1.38566e-09
Smarca4	2.35137e-11	0.44125	0.963	0.823	4.28502e-09
Tmsb10	1.59492e-10	0.356918	1	1	2.74503e-08
Irak1bp1	1.24685e-09	0.417755	0.665	0.418	2.03302e-07
Erh	1.49603e-09	0.320491	0.994	0.993	2.31735e-07
Ubc	2.01587e-09	-0.239284	0.994	0.986	2.97389e-07
Pgk1	3.60644e-09	-0.151779	1	1	5.07852e-07
P4ha1	6.24869e-09	-0.313367	0.584	0.73	8.41672e-07
Eif5a	9.23627e-09	0.253978	1	1	1.19225e-06
Des	1.04026e-08	-0.491226	0.385	0.56	1.28909e-06
Srsf2	1.27317e-08	0.304534	1	1	1.51703e-06
Gm10036	1.66127e-08	-0.283408	0.602	0.787	1.90616e-06
Fxyd2	2.50992e-08	-0.324312	0.292	0.546	2.77704e-06
Rps21	3.72439e-08	0.183143	1	1	3.97868e-06
Arf5	5.85012e-08	0.319939	0.994	0.972	6.04123e-06
Ppp1r14b	6.47407e-08	0.328055	1	1	6.4699e-06
Psma7	1.25499e-07	0.261177	0.994	1	1.21499e-05
Serpinh1	1.57278e-07	0.308995	0.994	0.993	1.43456e-05
Hist3h2ba	1.57441e-07	0.463287	0.851	0.688	1.43456e-05
Ptma	2.03473e-07	0.22653	1	1	1.80103e-05
Top1	3.66631e-07	0.248755	1	1	3.07553e-05
Isyna1	3.67317e-07	0.378911	0.876	0.823	3.07553e-05
Ssbp4	4.39471e-07	0.358901	0.932	0.929	3.58285e-05
Snrpg	5.45951e-07	0.272821	0.988	1	4.23994e-05
Cfl1	5.47442e-07	0.234275	1	1	4.23994e-05
Eif5	6.04277e-07	0.323341	0.994	1	4.49735e-05
Cox5b	6.09712e-07	0.266231	0.994	0.993	4.49735e-05
Ciapin1	7.13756e-07	0.358094	0.87	0.688	5.14236e-05
Calm1	7.84833e-07	0.290011	1	0.993	5.52593e-05
Cdk4	8.27917e-07	0.226911	1	1	5.69975e-05
Ppia	9.83943e-07	0.184593	1	1	6.62664e-05
Ctsl	1.00886e-06	-0.20288	0.969	0.986	6.64986e-05
Rnf187	1.33629e-06	0.283818	0.981	0.972	8.62462e-05
Phb	1.5954e-06	0.317386	0.938	0.879	0.000100869
Pfn1	1.68652e-06	0.239317	1	1	0.000104497
Atp5e	2.33533e-06	0.22585	1	1	0.00014186
Fkbp8	2.63286e-06	0.298386	0.963	0.887	0.000156572
Gstp1	2.6786e-06	0.363285	0.665	0.482	0.000156572
Atic	3.25874e-06	0.327571	0.894	0.752	0.000186955
Ddx6	3.33739e-06	0.333613	0.932	0.851	0.000187986
Marcksl1	3.98597e-06	0.240458	1	1	0.00022051
Srsf6	4.09401e-06	0.293057	0.994	0.972	0.000222513
Ubqln2	4.21803e-06	0.329597	0.783	0.582	0.000225301
Phlda3	4.3216e-06	-0.227031	0.714	0.809	0.000226921
Prdx2	4.5094e-06	0.204761	1	1	0.000232835
Pdia6	4.82314e-06	0.270882	1	0.986	0.000244534
Atp5k	4.89383e-06	0.243947	1	0.993	0.000244534
Pdap1	5.98596e-06	0.240842	0.988	1	0.000294357
Hist1h2ap	6.18084e-06	0.55028	0.975	0.943	0.000299191
Hsp90aa1	6.6797e-06	0.216237	1	1	0.000318365
Ppp1ca	7.27976e-06	0.238401	0.994	1	0.000341707
Prmt1	7.80581e-06	0.20723	1	1	0.000356185
Hmgcr	7.81813e-06	0.341814	0.708	0.468	0.000356185
Usp50	8.72454e-06	0.319018	0.727	0.589	0.000391719
Trim28	9.77325e-06	0.262479	0.994	0.979	0.000432536
D8Ertd738e	1.03774e-05	0.260529	0.988	0.965	0.000452805
Igfbp7	1.05594e-05	-0.38514	0.447	0.596	0.000454348
Cyb5r3	1.14151e-05	0.330424	0.876	0.759	0.000479132
Uqcrc1	1.14447e-05	0.274524	0.988	0.922	0.000479132
Tmem234	1.21188e-05	0.292965	0.95	0.915	0.000500587
H3f3a	1.24754e-05	0.169991	1	1	0.000508537
Rab26os	1.43051e-05	0.323754	0.466	0.262	0.000575547
Ybx1	1.62238e-05	0.186235	1	1	0.000644376
Mat2a	1.72032e-05	0.302375	0.963	0.957	0.000671798
Fen1	1.73479e-05	0.323285	0.814	0.667	0.000671798
Uqcrq	2.04208e-05	0.257553	1	0.993	0.000781031
Srsf3	2.08031e-05	0.229919	1	1	0.000785951
Atp5j2	2.18502e-05	0.217003	1	1	0.000815304
Oaz1	2.21064e-05	0.196151	1	1	0.000815304
Ctdspl	2.26846e-05	0.327556	0.913	0.872	0.000826786
Vps36	2.52734e-05	0.313745	0.832	0.716	0.000910429
Gnas	3.09338e-05	0.229754	1	1	0.00109821
H2afy	3.11952e-05	0.210054	1	1	0.00109821
Crip1	3.22966e-05	0.328329	0.739	0.56	0.00112421
Eno1	3.42345e-05	0.231928	1	1	0.00117843
Spock2	3.60536e-05	0.330873	0.969	0.879	0.00122741
Eif1	4.09943e-05	0.19295	1	1	0.00135971
Slc1a5	4.10874e-05	0.363792	0.41	0.085	0.00135971
Osr1	4.12564e-05	0.435127	0.665	0.553	0.00135971
Aes	4.20307e-05	0.257582	1	1	0.00137064
Hmga1	5.02716e-05	0.304004	0.54	0.411	0.00160859
Tril	5.05908e-05	0.424263	0.832	0.773	0.00160859
Luc7l3	5.08851e-05	0.264184	0.994	0.979	0.00160859
Vcp	5.56331e-05	0.241869	1	1	0.00174092
Stip1	5.84921e-05	0.269438	0.969	0.915	0.00181209
Slc9a5	6.25193e-05	0.397984	0.391	0.043	0.00191767
Dnaja1	6.4255e-05	0.249158	1	1	0.00195159
Ube2l3	6.81942e-05	0.254298	0.988	0.993	0.00205112
Rbbp7	7.01273e-05	0.270088	0.981	0.972	0.00208898
Glrx5	7.78431e-05	0.254293	0.981	0.965	0.00229674
Ssrp1	9.2848e-05	0.228272	1	0.979	0.00271361
Ptbp1	9.89052e-05	0.264292	0.944	0.901	0.00286351
Fdps	0.000100638	0.383529	0.814	0.645	0.00286351
Gtf3c6	0.000101359	0.305906	0.888	0.752	0.00286351
Aldoa	0.000101674	-0.142141	0.994	1	0.00286351
Dync1i2	0.000103441	-0.126588	0.95	0.986	0.00288704
Ran	0.000115433	0.188297	1	1	0.00319297
Tomm7	0.000125207	0.219738	0.994	0.986	0.00343267
Mettl1	0.00013759	0.284655	0.807	0.809	0.00371296
Rragd	0.000137828	-0.200964	0.453	0.624	0.00371296
Hnrnpc	0.000148312	0.223959	0.988	0.993	0.00394983
mt-Nd1	0.000150468	0.205303	1	1	0.00394983
Ccar1	0.000150893	0.279043	0.944	0.957	0.00394983
Prdx1	0.00015172	0.199698	1	0.993	0.00394983
Arpc2	0.000158132	0.243634	1	0.986	0.00408244
Tsc22d1	0.000166317	0.260122	1	1	0.00425226
Ube2f	0.000167455	0.271377	0.615	0.475	0.00425226
Nxf1	0.000169423	0.24806	0.963	0.972	0.00426725
Gid8	0.000177808	0.272821	0.634	0.454	0.00444233
Mrpl43	0.000198822	0.267516	0.851	0.837	0.00492761
Psma5	0.000207713	0.223739	0.988	0.993	0.00510711
Col26a1	0.000218758	0.308643	0.845	0.752	0.00533631
Psmd2	0.000220985	0.245319	0.981	0.95	0.00534853
mt-Nd6	0.000233832	-0.195467	0.677	0.801	0.00561304
Hist1h2ab	0.000236271	0.353917	0.602	0.532	0.00561304
Wdr89	0.000237349	-0.172175	0.683	0.73	0.00561304
Igfbp2	0.000242053	0.306722	0.938	0.865	0.00568092
Eif4a1	0.000249692	0.182201	1	1	0.00581613
mt-Cytb	0.00025667	0.198708	1	1	0.00593406
Ddx5	0.000268447	0.238634	1	1	0.00616037
Slc16a3	0.000271571	-0.230283	0.472	0.61	0.00618622
Metap2	0.000305553	0.210369	1	1	0.0069095
Bnip3	0.000312307	-0.217098	0.391	0.518	0.00701107
Dnajc3	0.000314642	0.269621	0.783	0.603	0.00701268
Ssr2	0.000318936	0.225766	0.994	0.993	0.0070576
Mettl16	0.000323221	0.272821	0.764	0.688	0.0071017
Psmc6	0.000328118	0.231222	0.988	0.965	0.00715851
Csrp2	0.000340885	-0.263967	0.901	0.894	0.00738504
Gdi2	0.000343993	0.224539	0.988	0.979	0.00740062
Mbd3	0.000366344	0.217643	0.981	0.993	0.00782712
Ywhab	0.000386033	0.227629	0.994	0.957	0.00819131
Sf3a2	0.000390925	0.267447	0.764	0.624	0.00823868
Arhgdia	0.000393711	0.255058	0.944	0.887	0.00824133
Fscn1	0.000397687	0.254832	0.957	0.879	0.0082687
Med13l	0.000403518	0.271389	0.578	0.433	0.00833399
Cpsf2	0.000427775	0.26659	0.789	0.617	0.00877647
Sparc	0.000444125	0.260722	1	1	0.00905197
Sel1l3	0.000451049	0.287209	0.602	0.355	0.00913301
Abhd17a	0.00045798	0.253478	0.925	0.816	0.00921312
Son	0.000464962	0.216461	1	1	0.00929324
Psmb7	0.000481047	0.239405	0.938	0.922	0.0095531
Psmd7	0.000490321	0.212645	0.994	0.993	0.00967525
Kpna2	0.000505143	0.339266	0.59	0.411	0.00990465
Psmb6	0.000516643	0.204191	0.994	0.986	0.00999612
Zfp219	0.000517776	0.262415	0.776	0.66	0.00999612
Pmepa1	0.000519488	-0.23383	0.292	0.39	0.00999612
Gipc1	0.000526884	0.250051	0.894	0.865	0.0100453
Acot7	0.000528531	0.264814	0.516	0.355	0.0100453
Col1a2	0.00053594	0.315853	0.584	0.326	0.010124
Smdt1	0.000548115	0.240541	0.969	0.993	0.0102495
P4hb	0.000549198	0.254097	0.944	0.887	0.0102495
Hmgcs1	0.000573334	0.322492	0.658	0.532	0.0106065
Ccdc25	0.000575173	0.261931	0.727	0.546	0.0106065
Tpbg	0.000594132	0.270213	0.658	0.525	0.0108356
Ube2n	0.000594593	0.223519	0.988	0.95	0.0108356
Atp2a2	0.000608706	0.291069	0.826	0.695	0.0110279
Rpl35	0.00062915	0.149036	1	1	0.011332
1810022K09Rik	0.000635452	0.238624	0.963	0.901	0.0113794
Zfp428	0.000665306	0.247208	0.894	0.78	0.0118331
Ywhaq	0.000676818	0.203471	1	1	0.0118331
Gcn1l1	0.000677219	0.255907	0.776	0.617	0.0118331
Banf1	0.00067983	0.224671	0.994	0.993	0.0118331
Pelp1	0.000679888	0.262804	0.714	0.582	0.0118331
Aco2	0.000690381	0.234721	0.969	0.929	0.0119486
Nadk	0.000697126	0.247081	0.559	0.418	0.0119983
Psmd8	0.000711713	0.219556	0.975	0.936	0.0121817
Phf6	0.000719314	0.253772	0.665	0.546	0.0122441
Rbm42	0.00074878	0.249725	0.82	0.716	0.0126614
mt-Nd4	0.000752003	0.188875	1	1	0.0126614
Psmc2	0.000761774	0.240932	0.957	0.965	0.0127566
Wars	0.000775748	0.243262	0.571	0.355	0.0129208
Aimp2	0.00078957	0.254737	0.832	0.752	0.0130513
Ccdc85b	0.000792009	0.248005	0.72	0.596	0.0130513
Apopt1	0.000816079	0.250491	0.795	0.631	0.013349
Skiv2l2	0.000818695	0.24547	0.87	0.773	0.013349
Tpm3	0.000828331	-0.108975	0.957	0.957	0.0134354
Manf	0.000837848	0.260045	0.95	0.936	0.0134629
Nosip	0.000838715	0.250772	0.54	0.404	0.0134629
Acly	0.000888791	0.25286	0.671	0.475	0.0141221
Taldo1	0.000888896	0.229249	0.975	0.957	0.0141221
Nfyc	0.000936975	0.247715	0.665	0.475	0.0148099
Ldlr	0.000942164	0.344477	0.348	0.191	0.0148164
Slc6a6	0.000955109	0.263646	0.733	0.589	0.0149441
Cycs	0.000968842	0.260618	0.969	0.922	0.0150828
S100a11	0.00100409	-0.126555	0.944	0.972	0.0155534
Chd3	0.00104179	0.273446	0.901	0.851	0.0160117
N4bp2l2	0.00104402	-0.141904	0.72	0.879	0.0160117
Gm13305	0.00109175	-0.233449	0.186	0.39	0.0166613
Ndufa1	0.00110228	0.241118	0.907	0.83	0.0167396
Pfdn2	0.00111835	0.21252	0.981	0.986	0.0169007
Lmna	0.00113058	0.246845	0.602	0.504	0.0170026
Wfdc2	0.00120612	0.420827	0.82	0.73	0.0179675
Nes	0.00120693	0.293721	0.783	0.667	0.0179675
Rpl36a-ps1	0.00121214	-0.172332	0.416	0.475	0.0179675
Uqcr11	0.00123708	0.191629	0.994	1	0.0182498
Ryk	0.00128325	0.252379	0.957	0.929	0.0187715
Slc35a1	0.00128959	-0.152984	0.497	0.66	0.0187715
Pcbp4	0.00129062	0.230028	0.975	0.943	0.0187715
Rrm1	0.00131516	0.251906	0.919	0.858	0.0190391
Dbnl	0.00132579	0.235896	0.839	0.816	0.0190493
Ap1s1	0.00132816	0.237539	0.888	0.83	0.0190493
Ndufs4	0.00134441	0.218332	0.988	0.936	0.0191319
Psmd4	0.00134627	0.21153	0.975	0.95	0.0191319
Crip2	0.00135692	0.325537	0.758	0.617	0.0191951
Tmem208	0.00138957	0.239379	0.87	0.752	0.0195676
Commd7	0.00139599	0.249067	0.727	0.582	0.0195691
Arl6ip4	0.00142377	0.237883	0.894	0.801	0.0198687
Rab11b	0.00145079	0.235247	0.888	0.78	0.020155
Sar1a	0.00148955	0.242049	0.863	0.823	0.0205097
Arpc5l	0.00148957	0.24023	0.907	0.794	0.0205097
Sf3b4	0.00150717	0.23706	0.845	0.794	0.0206602
Fkrp	0.00154261	-0.142595	0.491	0.645	0.0210528
Gfra1	0.00155146	0.237331	0.615	0.411	0.0210808
Atp6ap2	0.00156604	-0.149916	0.522	0.61	0.0211217
Ola1	0.00157044	0.220996	0.957	0.901	0.0211217
Ndufab1	0.00157492	0.196875	1	1	0.0211217
Acot13	0.00161541	-0.150282	0.497	0.61	0.0215713
Cnot6	0.00162605	0.249765	0.876	0.801	0.0216131
Fam192a	0.00163249	0.239635	0.814	0.738	0.0216131
Shroom3	0.00166954	0.250187	0.696	0.553	0.0220095
Timm17a	0.00170138	0.228369	0.907	0.887	0.0222847
Pomp	0.0017048	0.195382	1	0.993	0.0222847
Asf1a	0.00172892	0.238768	0.925	0.872	0.0225051
Ap3s1	0.00173674	0.237409	0.77	0.603	0.0225122
Actb	0.00175786	0.217943	1	1	0.022691
Ube2m	0.00179906	0.211107	0.988	0.979	0.0231265
Eif2s2	0.0018084	0.190337	0.994	1	0.0231505
Fbl	0.00181873	0.194015	1	0.993	0.0231723
Minos1	0.00182506	0.203409	1	0.993	0.0231723
G3bp1	0.00184619	0.196578	0.994	0.993	0.0233449
Luzp1	0.00187377	0.251081	0.851	0.794	0.0235973
Ppa1	0.00188978	0.223791	0.981	0.979	0.0236608
AY036118	0.00189409	-0.397382	0.919	0.936	0.0236608
Zfp326	0.00192917	0.241665	0.913	0.858	0.0240023
Surf4	0.00197366	0.238702	0.752	0.603	0.0244575
Atox1	0.00198423	0.224726	0.944	0.879	0.0244906
Ppp1r14a	0.00200922	-0.249661	0.373	0.553	0.0247006
Cyth2	0.00203209	0.236027	0.876	0.78	0.0248831
Gorasp2	0.00205028	0.231663	0.652	0.489	0.025007
Jpt1	0.00210713	0.250842	0.981	1	0.0255996
Lrr1	0.00214429	0.227596	0.491	0.298	0.0258623
Ahsa1	0.00214545	0.219388	0.919	0.915	0.0258623
Mrps12	0.00216014	0.236969	0.851	0.752	0.0259385
Tmem37	0.00219739	-0.279024	0.186	0.284	0.0262062
Map2k2	0.00219936	0.21765	0.95	0.957	0.0262062
Rpl10-ps3	0.00220853	-0.146982	0.484	0.596	0.0262147
Npm3	0.00221869	0.265906	0.988	0.936	0.0262347
Wdr6	0.00223668	0.241524	0.826	0.709	0.0263469
Sympk	0.00226987	0.235727	0.602	0.433	0.0265966
Rps27	0.00228229	0.144781	1	1	0.0265966
Ccm2	0.00228363	0.224996	0.516	0.348	0.0265966
Fkbp10	0.00233599	0.230856	0.708	0.56	0.0271045
Smarce1	0.00244182	0.214299	0.994	0.965	0.0282267
Uqcr10	0.00249077	0.188654	0.994	1	0.0286855
Cbr1	0.0025221	-0.123428	0.745	0.78	0.0289387
Gm7324	0.00257078	0.331469	0.342	0.057	0.0293885
Calr	0.00260287	0.231766	0.988	0.993	0.0296035
Psma6	0.0026087	0.202432	0.988	0.943	0.0296035
Akr1a1	0.00264185	0.195992	1	0.979	0.0298702
Bri3bp	0.0026556	0.227564	0.77	0.638	0.0299165
Ybx3	0.00271937	0.19955	1	1	0.0305239
Ube2d3	0.00273178	0.210369	0.981	1	0.0305526
Pcbp1	0.00277534	0.187207	0.994	0.993	0.0309281
Ndufa5	0.00286668	0.210968	0.975	0.965	0.0318314
Cct8	0.00291799	0.184838	1	1	0.0322494
Rbm45	0.00292514	-0.168848	0.28	0.411	0.0322494
Fxyd1	0.00294108	-0.163827	0.261	0.426	0.0323101
Wdfy1	0.00296762	0.228369	0.509	0.312	0.0324865
Mfge8	0.00297865	0.240367	0.944	0.83	0.0324925
Snrpf	0.00303576	0.178731	1	1	0.0329977
Fosb	0.00305178	-0.245892	0.565	0.681	0.0329977
Srsf7	0.00305692	0.207212	0.994	1	0.0329977
Lrrc45	0.00308525	0.215112	0.602	0.39	0.0331879
Sem1	0.00311222	0.180467	1	1	0.0333621
Tstd2	0.00313041	0.224996	0.516	0.34	0.0334415
Eif4e	0.00314486	0.216423	0.932	0.887	0.0334804
Ptov1	0.00322975	0.176106	1	1	0.0342663
Cyp51	0.00327416	0.236955	0.565	0.426	0.0346189
Tecr	0.00332651	0.187562	1	0.986	0.0350175
Rpl27	0.00333446	0.182152	1	0.993	0.0350175
Clint1	0.00342822	0.271046	0.82	0.738	0.0358805
Sdf4	0.00362377	0.221311	0.845	0.809	0.0376402
Obsl1	0.00363035	0.2183	0.621	0.489	0.0376402
Nop14	0.0036328	0.237729	0.814	0.787	0.0376402
Srrt	0.00365648	0.251429	0.913	0.83	0.0377592
Rnf41	0.00368425	0.225147	0.422	0.227	0.0378565
Pak1ip1	0.00369033	0.223175	0.882	0.887	0.0378565
Adat2	0.00379757	-0.154059	0.329	0.447	0.0387827
Clmp	0.00381815	0.267499	0.925	0.894	0.0387827
Chordc1	0.003827	0.224926	0.783	0.66	0.0387827
Ranbp1	0.0038307	0.207508	1	1	0.0387827
Ttc28	0.00387851	0.243468	0.944	0.894	0.0390271
Phf5a	0.00388003	0.199784	0.994	0.986	0.0390271
Hnrnpa3	0.00394079	0.241423	1	1	0.03951
Snrpc	0.00396756	0.201644	0.975	0.972	0.03965
Nxt1	0.00398811	0.231236	0.839	0.766	0.0397273
Mrpl21	0.00404359	0.213276	0.95	0.943	0.0399699
Hoxa5	0.00404743	0.245571	0.634	0.461	0.0399699
Fam133b	0.00405118	0.21413	0.957	0.894	0.0399699
Rab6a	0.0040767	0.222177	0.882	0.83	0.040094
Prdx5	0.00411005	0.205681	0.981	0.95	0.0402941
Fkbp4	0.00422124	0.184702	0.994	0.986	0.0411968
Sf3b2	0.00422872	0.197233	0.994	0.993	0.0411968
Ccdc8	0.0042442	-0.132644	0.528	0.61	0.0412179
Zbed3	0.00426651	-0.141353	0.565	0.674	0.0412304
Lsm3	0.00428276	0.198832	0.981	0.986	0.0412304
Ptrhd1	0.00428541	0.215192	0.658	0.532	0.0412304
Cdc42	0.00429923	0.197449	0.994	0.979	0.0412353
2310011J03Rik	0.0043197	0.213732	0.665	0.454	0.0413038
Dcn	0.0043601	0.246207	0.385	0.149	0.0415618
Anapc7	0.0043799	0.21811	0.714	0.589	0.0416225
Borcs8	0.00440113	0.22122	0.714	0.589	0.0416963
Zfp266	0.00456233	0.236263	0.901	0.83	0.0429679
Mapre1	0.00456309	0.217558	0.963	0.936	0.0429679
Cebpz	0.00458798	0.228482	0.907	0.915	0.0430714
Eif1ad	0.00467316	0.227424	0.776	0.652	0.0437385
Aggf1	0.00471258	0.222093	0.752	0.617	0.0439746
Sae1	0.0047747	0.199489	0.957	0.943	0.0444205
Smarcd3	0.00490372	0.213534	0.621	0.525	0.0454842
Dpp3	0.00495653	0.218332	0.665	0.504	0.0458368
Adrm1	0.00500251	0.214732	0.901	0.823	0.0460056
Ckb	0.00501842	0.266872	0.609	0.489	0.0460056
Hspa5	0.00501933	0.220913	1	0.986	0.0460056
Mycbp	0.00504805	0.210425	0.646	0.489	0.0461324
Epb41l4aos	0.00510357	-0.100596	0.845	0.801	0.0465025
Mdh2	0.00513678	0.185736	0.994	0.993	0.0466678
Gstk1	0.00516444	0.240031	0.398	0.234	0.0467819
Rab14	0.00521492	0.200923	0.988	0.979	0.0469906
Rbm4b	0.00522321	0.216572	0.845	0.638	0.0469906
Cacnb4	0.00523297	0.217793	0.441	0.298	0.0469906
Alg6	0.00529805	-0.140875	0.36	0.504	0.0474375
Pla2g7	0.00540423	0.287403	0.627	0.539	0.0482487
Lamtor3	0.00544982	-0.112383	0.646	0.73	0.0485159
Tcp1	0.00547021	0.182588	1	1	0.0485579
Raly	0.00551633	0.191611	0.994	0.972	0.0488274
Cdipt	0.00560689	0.208062	0.491	0.348	0.0494245
Mga	0.00563999	0.230989	0.789	0.716	0.0494245
Nom1	0.00565675	0.223306	0.658	0.539	0.0494245
Mrpl12	0.00566233	0.196437	0.988	0.993	0.0494245
H2afy2	0.00566356	0.209018	0.963	0.908	0.0494245
Gadd45gip1	0.00574838	0.213632	0.901	0.809	0.0498882
Dhx15	0.0057489	0.204952	0.944	0.894	0.0498882
Usp7	0.0058328	0.212295	0.832	0.773	0.0504749
Cops3	0.00593592	0.207716	0.938	0.872	0.0510957
Pithd1	0.00593752	0.203828	0.491	0.355	0.0510957
Secisbp2l	0.0059901	0.20923	0.516	0.369	0.0514053
Ctnnb1	0.00607869	0.198114	0.981	0.993	0.0520215
Ndufb10	0.00610716	0.188263	0.981	0.979	0.0521212
Pa2g4	0.00615449	0.195825	1	0.986	0.0523808
Ndufa11	0.00618646	0.195177	0.988	0.943	0.0524616
Ogt	0.00619786	0.222366	0.882	0.809	0.0524616
Lbx2	0.00626375	-0.144526	0.366	0.44	0.0526863
Nnat	0.00627178	0.257865	0.82	0.738	0.0526863
Fubp1	0.00627542	0.196835	0.994	0.986	0.0526863
Opa3	0.00632935	0.207597	0.559	0.418	0.0529954
Mitd1	0.00641529	0.203828	0.503	0.362	0.0535703
Fkbp1a	0.00646929	0.192778	0.975	0.986	0.053876
Hmgn2	0.00650797	0.217865	1	1	0.0539803
Ncbp2	0.00651666	0.213069	0.913	0.915	0.0539803
Slc9a3r2	0.00655786	0.217443	0.472	0.298	0.0541767
Ucp2	0.00659735	0.245757	0.826	0.709	0.0542402
Ppp3r1	0.00660057	-0.140581	0.391	0.539	0.0542402
Hnrnpab	0.00666633	0.177406	1	1	0.0545265
Mgst1	0.00667061	-0.127409	0.602	0.738	0.0545265
Gm10093	0.00679866	-0.171865	0.205	0.369	0.0554269
Rps27rt	0.00683395	-0.148209	0.379	0.511	0.0555684
Hnrnpm	0.00692255	0.20464	0.994	1	0.0561415
Arf1	0.00702469	0.175874	0.994	1	0.0568211
Aldh1a2	0.00707856	-0.136605	0.839	0.922	0.0571078
Spsb3	0.0071034	0.197442	0.528	0.362	0.0571593
Alyref	0.00714194	0.203176	0.994	0.936	0.0573206
Smox	0.00727215	0.207223	0.509	0.305	0.058155
Kctd5	0.00728525	0.198019	0.596	0.404	0.058155
Rcc1	0.00730222	0.202689	0.646	0.546	0.058155
Blvrb	0.00736066	0.210065	0.689	0.482	0.058237
Cdh6	0.00741318	-0.202398	0.317	0.454	0.058237
Mfap1b	0.00741401	0.20244	0.509	0.376	0.058237
Tubb2b	0.0074163	0.278412	0.826	0.78	0.058237
Psmb4	0.00742143	0.179579	0.988	0.986	0.058237
Trpc4ap	0.00742531	0.212495	0.702	0.56	0.058237
Spata5	0.00748555	0.202331	0.447	0.333	0.0585372
Ppp1r10	0.00750138	0.237504	0.727	0.617	0.0585372
Lta4h	0.00753696	0.208852	0.739	0.681	0.0585745
Igfbp5	0.00754397	0.436533	0.876	0.872	0.0585745
Uba2	0.00765439	0.193992	0.969	0.957	0.0591511
Snhg9	0.00765642	-0.1287	0.441	0.482	0.0591511
Mtch1	0.00768521	0.176283	0.988	0.993	0.0592258
Cenpu	0.00773097	0.210945	0.472	0.312	0.0593878
Ptpn1	0.00774457	0.210001	0.764	0.645	0.0593878
Tubgcp2	0.00779982	0.212352	0.64	0.567	0.0596638
Tpst2	0.00788643	0.212196	0.522	0.461	0.060164
Abcf2	0.00790994	0.211078	0.87	0.78	0.060164
Fos	0.00796099	-0.250195	0.727	0.794	0.060164
Bmyc	0.00799674	0.225815	0.832	0.716	0.060164
Tmem55b	0.00799977	0.196379	0.596	0.426	0.060164
Msantd4	0.00801772	-0.108619	0.584	0.667	0.060164
Gfod2	0.008022	-0.171865	0.398	0.348	0.060164
Exosc9	0.00803243	0.203295	0.714	0.596	0.060164
Snhg6	0.00804	0.210111	0.814	0.738	0.060164
Hdac1	0.0081178	0.204137	0.913	0.851	0.0605718
Tma7	0.00813359	0.193848	1	1	0.0605718
Fam32a	0.00817057	0.217391	0.87	0.801	0.0605781
Snhg18	0.00817355	-0.136063	0.46	0.56	0.0605781
Sfpq	0.00824564	0.263823	1	0.993	0.0609666
Arglu1	0.00829642	0.214243	0.988	0.965	0.061196
Gsk3a	0.00832104	0.210065	0.652	0.56	0.0612318
Nudcd3	0.00838385	0.20349	0.901	0.787	0.0615478
Chd1	0.00852086	0.212295	0.87	0.773	0.0624057
Dnajc15	0.00857811	0.212095	0.87	0.809	0.0624061
Nfix	0.00859315	-0.149961	0.311	0.397	0.0624061
Pef1	0.00859416	0.193287	0.54	0.404	0.0624061
Wdr43	0.00860681	0.212484	0.963	0.929	0.0624061
Cat	0.00863524	0.21017	0.578	0.525	0.0624061
Rnf4	0.00864177	0.216308	0.82	0.723	0.0624061
Mrpl19	0.00867631	0.220941	0.845	0.794	0.0625098
Ube2t	0.0087735	-0.132644	0.522	0.596	0.0628885
Ndufb2	0.008776	0.199175	0.932	0.901	0.0628885
Ube2j2	0.00880518	0.205984	0.876	0.823	0.0628885
Nudc	0.00881008	0.172703	0.994	1	0.0628885
Map1lc3b	0.0088408	0.208185	0.944	0.943	0.0629627
Phip	0.0089794	0.215405	0.957	0.922	0.0638032
Slc39a7	0.00903417	0.214789	0.714	0.716	0.0640455
Mrpl58	0.00912132	0.204642	0.907	0.929	0.0645156
Snapc5	0.00920647	0.2055	0.609	0.518	0.0649696
Pum1	0.00929169	0.206493	0.957	0.95	0.0654038
Mdn1	0.00931023	0.227056	0.522	0.454	0.0654038
Ppp2r1a	0.00949907	0.205147	0.894	0.78	0.0665747
Gm9493	0.00955024	-0.121595	0.472	0.574	0.0665747
Hsd11b2	0.00957197	0.260398	0.602	0.447	0.0665747
Eif2b3	0.00957353	0.205919	0.64	0.553	0.0665747
Mars	0.00958434	0.20229	0.708	0.589	0.0665747
Pold2	0.00962756	0.207438	0.814	0.745	0.0666811
Incenp	0.00964272	0.251314	0.851	0.78	0.0666811
Bop1	0.00966756	0.19773	0.609	0.468	0.066704
Lrwd1	0.00972843	-0.115781	0.534	0.589	0.0667761
Phf20l1	0.00974239	0.239738	0.764	0.787	0.0667761
Mrfap1	0.00974367	0.162478	1	1	0.0667761
Rnf157	0.00976423	0.201955	0.547	0.411	0.0667761
Pinx1	0.00979184	0.22673	0.497	0.376	0.0667802
Akr7a5	0.00980794	0.208475	0.882	0.851	0.0667802
Cotl1	0.00996492	0.22854	0.801	0.667	0.0677003
Pola2	0.0100497	-0.185637	0.497	0.511	0.0681221
Tbcb	0.0101084	0.210621	0.894	0.851	0.0681221
Arhgap1	0.0101086	0.196475	0.447	0.312	0.0681221
Tsix	0.010115	-0.182541	0.217	0.284	0.0681221
Ncam1	0.0102192	0.198414	0.988	0.979	0.0686022
Gnaq	0.0102305	0.211969	0.801	0.667	0.0686022
Selenos	0.0103132	0.211083	0.839	0.752	0.0689661
Polr2l	0.0103293	0.219037	0.615	0.525	0.0689661
Hjurp	0.0103685	-0.113063	0.845	0.887	0.0690788
Alkbh6	0.0104155	0.192778	0.578	0.426	0.0691213
Sall1	0.0104302	0.221969	0.851	0.709	0.0691213
Ube2j1	0.0104418	0.192778	0.472	0.305	0.0691213
Cpsf7	0.0104794	0.193752	0.547	0.404	0.0692219
Mrpl32	0.0105084	0.204486	0.863	0.823	0.0692658
Ftsj3	0.0106082	0.207269	0.814	0.773	0.0697754
Trir	0.0106407	0.1781	0.994	0.979	0.0698408
Chmp6	0.010716	0.201023	0.646	0.518	0.0700365
Gsn	0.010735	-0.20001	0.404	0.426	0.0700365
Fkbp9	0.0107465	0.205534	0.634	0.525	0.0700365
Vps16	0.0107609	-0.118409	0.491	0.589	0.0700365
Scd2	0.0108127	0.226581	0.901	0.879	0.0702261
Psmd6	0.0109114	0.184959	0.963	0.936	0.0707183
Ddb1	0.010935	0.21888	0.925	0.894	0.0707239
Dcp2	0.0109751	0.194656	0.689	0.582	0.0708351
Denr	0.0111014	0.190595	0.95	0.979	0.0714079
Klhdc3	0.0111123	0.20487	0.652	0.567	0.0714079
Etv4	0.011133	0.232071	0.733	0.695	0.0714079
Yeats4	0.0112684	0.204091	0.95	0.894	0.0720951
Selenow	0.0112972	0.168293	1	1	0.0720951
Chtf8	0.011328	0.205517	0.776	0.752	0.0720951
Sfxn1	0.0113461	0.206838	0.907	0.887	0.0720951
Txndc9	0.0113641	0.197352	0.932	0.879	0.0720951
Ctdnep1	0.0113798	0.203828	0.82	0.709	0.0720951
Psmf1	0.0114157	0.191672	0.46	0.383	0.072175
Rnf10	0.011505	0.204192	0.839	0.773	0.0725739
Dynlrb1	0.0115256	0.190073	0.95	0.957	0.0725739
Bloc1s2	0.0115707	0.196448	0.671	0.532	0.0727099
Msl1	0.0116683	0.203399	0.789	0.681	0.0731752
Hist1h2bj	0.0116999	0.226817	0.516	0.319	0.0732047
Elf2	0.0117203	0.206093	0.77	0.631	0.0732047
Dnajc8	0.0117553	0.184488	0.981	0.957	0.073207
Uchl3	0.0117804	0.199175	0.938	0.908	0.073207
Sec61g	0.0118113	0.164623	1	0.993	0.073207
Hdgfl2	0.0118152	0.199489	0.882	0.766	0.073207
Cep162	0.011854	0.222608	0.472	0.348	0.0733008
Utp4	0.0119166	0.187403	0.547	0.411	0.0734208
Sf3b5	0.0119208	0.177873	0.988	0.972	0.0734208
Nup50	0.0119897	0.199723	0.696	0.603	0.0735816
Tmem258	0.0119944	0.18073	0.988	0.986	0.0735816
Amn1	0.0120275	0.204418	0.565	0.475	0.0736385
Pusl1	0.012112	0.194119	0.491	0.397	0.0739708
Lrif1	0.0121295	-0.113812	0.441	0.532	0.0739708
Mdh1	0.0121789	0.177124	1	1	0.0741265
Dmap1	0.0122649	0.193233	0.578	0.454	0.074463
Sms	0.0122823	0.192226	0.969	0.943	0.074463
Orc2	0.0123086	0.199405	0.658	0.525	0.0744769
Cxxc1	0.0123751	0.19106	0.665	0.539	0.074601
Cops6	0.0123773	0.19035	0.994	0.965	0.074601
Gnai2	0.0124608	0.190609	0.994	0.986	0.0748867
Rnf122	0.0124826	0.22403	0.54	0.376	0.0748867
Gapdh	0.0125093	0.150115	1	1	0.0748867
Akirin1	0.0125736	0.193969	0.602	0.418	0.0748867
Snai2	0.012582	-0.159621	0.286	0.404	0.0748867
Acat2	0.0125877	0.199795	0.739	0.638	0.0748867
Stmn1	0.0125939	0.168222	1	1	0.0748867
Las1l	0.0126729	0.19794	0.82	0.752	0.0752122
Sqle	0.0128334	0.209215	0.565	0.404	0.0760188
Nme1	0.0130021	0.210143	1	1	0.0768714
Gng12	0.0130837	-0.108955	0.516	0.617	0.0772065
Arpc1a	0.0131598	0.191831	0.957	0.922	0.0775075
Pin1	0.0131997	0.187685	0.944	0.936	0.077529
Orc6	0.0132265	0.208857	0.851	0.695	0.077529
Hes6	0.0132385	0.215469	0.696	0.596	0.077529
Drg2	0.0133754	0.197002	0.789	0.702	0.0781832
Hras	0.0134118	0.199362	0.87	0.872	0.0782483
Pkig	0.0134735	0.184764	0.957	0.922	0.0784603
Scaf11	0.0136153	0.20443	0.994	0.972	0.0791373
Clcn4	0.0136702	0.191143	0.602	0.461	0.0793077
Ppih	0.0136995	0.197529	0.907	0.844	0.0793288
Zranb2	0.0139795	0.199412	0.981	0.972	0.0807105
Nsrp1	0.0139902	0.207681	0.919	0.837	0.0807105
Prelid2	0.0141844	-0.105524	0.46	0.624	0.0816514
Sec13	0.0142178	0.207363	0.789	0.723	0.0816514
Cs	0.0142741	0.195741	0.807	0.702	0.0816514
Ift46	0.0142796	-0.105797	0.522	0.61	0.0816514
Phb2	0.0143055	0.165437	1	1	0.0816514
Psmb5	0.0143273	0.170663	0.994	0.993	0.0816514
Tomm40	0.014354	0.185041	1	0.936	0.0816514
Zfp704	0.0144159	0.220861	0.876	0.851	0.0816514
Tbc1d10a	0.014416	0.257616	0.553	0.426	0.0816514
Tysnd1	0.0144217	0.190869	0.584	0.404	0.0816514
Srebf2	0.0144694	0.196309	0.689	0.525	0.0816514
Fam53a	0.0144926	0.189687	0.602	0.461	0.0816514
Slc25a4	0.0145087	0.141643	1	1	0.0816514
Trmt10b	0.0145406	-0.120474	0.385	0.482	0.0816514
Gltp	0.0145486	-0.118409	0.478	0.582	0.0816514
Snx21	0.0146486	-0.132644	0.36	0.447	0.0820637
Poc1b	0.0146875	0.200767	0.41	0.262	0.0821332
Nus1	0.0147943	0.186586	0.602	0.433	0.0825818
Prr5l	0.0148253	0.208501	0.714	0.624	0.082606
Cab39	0.0149061	0.20229	0.677	0.56	0.0828173
Nfyb	0.0149167	0.192521	0.888	0.816	0.0828173
Aars	0.0149548	0.180162	0.54	0.39	0.0828799
Zmym5	0.0150027	0.20774	0.758	0.688	0.0828911
Imp4	0.0150103	0.19404	0.77	0.603	0.0828911
Oaz2	0.0151194	0.200554	0.758	0.652	0.0833448
Tpd52	0.0151778	0.206974	0.646	0.539	0.0834305
Ubl5	0.0151888	0.17536	0.981	0.993	0.0834305
Rhoa	0.015227	0.178657	0.994	0.979	0.0834625
Dbn1	0.0152623	0.221099	0.814	0.73	0.0834625
Nelfe	0.0153159	0.196228	0.845	0.794	0.0834625
Larp7	0.0153213	0.199338	0.919	0.879	0.0834625
Ythdf2	0.0153293	0.213632	0.826	0.766	0.0834625
Rpap3	0.015464	0.1983	0.776	0.667	0.0839667
Cct3	0.0154761	0.170997	1	1	0.0839667
Ogfr	0.0156712	0.201496	0.795	0.709	0.0848768
Fxn	0.0157266	0.200239	0.77	0.638	0.0849956
2022-03-05	0.0157481	0.194377	0.913	0.879	0.0849956
Has2	0.015865	0.205857	0.404	0.305	0.0854776
Atf5	0.0159201	0.185809	0.516	0.362	0.0856256
Fnbp4	0.0159771	0.201965	0.745	0.61	0.0856822
Grcc10	0.0159859	0.1977	0.739	0.652	0.0856822
Trp53rka	0.0163029	0.181924	0.528	0.369	0.0865377
Actl6a	0.0163404	0.19287	0.963	0.95	0.0865377
Akt1s1	0.0163595	0.195043	0.845	0.738	0.0865377
Usp19	0.016415	0.192778	0.652	0.582	0.0865377
Slc9a3r1	0.0164171	0.201521	0.733	0.652	0.0865377
Gapvd1	0.0164223	0.200594	0.783	0.723	0.0865377
Cct5	0.0164234	0.153931	0.994	1	0.0865377
Guf1	0.0164292	0.189256	0.578	0.482	0.0865377
Ptdss2	0.0164356	0.188055	0.739	0.539	0.0865377
Ercc1	0.0164497	0.191436	0.72	0.638	0.0865377
Mrps15	0.0164528	0.184414	0.957	0.908	0.0865377
Etv5	0.0167957	0.194568	0.447	0.383	0.0881736
Rad23a	0.0168207	0.189256	0.571	0.404	0.0881736
Arl3	0.0168883	0.185671	0.981	0.95	0.0883782
Ift20	0.0170102	0.209969	0.913	0.858	0.0887749
Sh3bgrl3	0.0170214	0.196587	0.901	0.858	0.0887749
Actg1	0.0170717	0.187429	1	1	0.088824
Fnta	0.017109	0.193516	0.845	0.816	0.088824
Mak16	0.0171168	0.197142	0.795	0.716	0.088824
Mrps10	0.0171951	0.191209	0.783	0.667	0.088941
Eif2b4	0.0171968	0.183769	0.534	0.404	0.088941
1110008F13Rik	0.0173249	0.193039	0.944	0.972	0.0894542
Pcnp	0.0174483	0.191143	0.863	0.773	0.0898051
Bloc1s1	0.0175007	0.207788	0.391	0.227	0.0898051
Zfand5	0.0175214	0.205379	0.938	0.872	0.0898051
Cdh4	0.0175284	0.276073	0.658	0.518	0.0898051
Parp1	0.0175378	0.201277	0.957	0.957	0.0898051
Lrp10	0.0175998	0.198578	0.398	0.298	0.0899737
Baz1a	0.0178862	0.198951	0.708	0.603	0.0912872
Rasl11a	0.018013	-0.195445	0.23	0.291	0.0917835
2610524H06Rik	0.018123	0.206534	0.82	0.773	0.0921564
Exosc10	0.0181457	0.187207	0.615	0.546	0.0921564
Gfm1	0.0182083	0.181771	0.522	0.326	0.0921794
Brd3	0.0182228	0.199429	0.969	0.965	0.0921794
Dram2	0.0182395	0.1827	0.46	0.369	0.0921794
Smim10l1	0.0183181	0.20027	0.832	0.716	0.0922261
Ndufc1	0.0183261	0.172384	0.988	0.986	0.0922261
9130401M01Rik	0.018338	0.191209	0.752	0.66	0.0922261
1810058I24Rik	0.018378	0.195043	0.919	0.908	0.0922774
Znhit3	0.0184846	0.197027	0.646	0.56	0.0924998
Gga2	0.0185016	0.19371	0.696	0.596	0.0924998
Palm	0.0185119	0.195996	0.714	0.574	0.0924998
Coro1c	0.0185455	0.187126	0.46	0.383	0.0925185
Magoh	0.0186524	0.189276	0.994	0.986	0.0927685
Acin1	0.0186785	0.211273	0.988	0.993	0.0927685
Vps9d1	0.0186983	0.19586	0.404	0.199	0.0927685
Cc2d2a	0.0187154	0.210141	0.422	0.312	0.0927685
Psmc4	0.0188209	0.181771	0.975	0.943	0.0931424
Tnfaip8	0.0188869	-0.132644	0.522	0.596	0.093208
Ubr1	0.0188943	0.18629	0.422	0.284	0.093208
mt-Co3	0.0189507	0.159041	1	1	0.0933376
Rsl1d1	0.019017	0.176044	0.988	0.972	0.0935156
Uchl5	0.0190747	0.183642	0.783	0.652	0.0936506
Uba1	0.0192454	0.195595	0.863	0.851	0.0943392
Fasn	0.0193782	0.193356	0.683	0.617	0.094532
Ubap1	0.0194148	0.179954	0.522	0.404	0.094532
Cox6c	0.0194261	0.156485	1	1	0.094532
Polr2a	0.019447	0.217643	0.901	0.879	0.094532
Mafb	0.0194482	-0.124024	0.267	0.376	0.094532
St13	0.0194961	0.178654	0.994	0.986	0.094532
Mid1	0.0194984	-0.171865	0.199	0.319	0.094532
Larp4	0.0195917	0.186664	0.739	0.66	0.0945955
Ndufv1	0.0196043	0.179111	0.963	0.936	0.0945955
Cops5	0.0196832	0.175598	0.963	0.986	0.0945955
Oxct1	0.0196835	0.176025	0.975	0.979	0.0945955
Fam193b	0.0196901	0.185809	0.609	0.504	0.0945955
Dhx9	0.0196947	0.219867	0.969	0.908	0.0945955
Rbm10	0.0197348	0.188324	0.739	0.667	0.0946416
Ptk2	0.0198178	0.183476	0.571	0.454	0.0948031
Tnfaip1	0.0198297	0.187626	0.857	0.78	0.0948031
Flywch1	0.0200703	0.187523	0.652	0.525	0.0958055
Tufm	0.0201035	0.192778	0.745	0.66	0.0958164
Oxa1l	0.0201865	0.189327	0.839	0.801	0.096064
Psmc1	0.0202615	0.184048	0.95	0.901	0.0960831
Crym	0.0202784	0.239735	0.857	0.766	0.0960831
Poglut1	0.0202835	0.184891	0.472	0.312	0.0960831
Id1	0.0203188	-0.174014	0.671	0.78	0.0961032
Ubxn4	0.0203868	0.187698	0.95	0.908	0.0962778
Vamp2	0.0204509	0.175944	0.522	0.39	0.0964337
Eif4g2	0.0205361	0.183813	1	1	0.0966882
Mtfr1l	0.020624	0.186931	0.764	0.66	0.0969546
Triap1	0.0207923	0.198713	0.602	0.468	0.0975976
Tex30	0.0209575	0.185479	0.677	0.638	0.0982244
Gon7	0.0209954	0.215433	0.509	0.489	0.0982536
Naa15	0.021089	0.197825	0.913	0.908	0.0985425
Smad1	0.0211604	0.178978	0.553	0.411	0.0986153
Kdm7a	0.0211682	-0.114945	0.441	0.546	0.0986153
Ddost	0.0213289	0.178757	0.957	0.965	0.0992148
Ywhae	0.0213896	0.16566	1	1	0.0993477
Rrs1	0.0214279	0.189013	0.776	0.688	0.0993769
Lpl	0.0214778	-0.127607	0.627	0.723	0.0994593
Phc1	0.0217476	0.186613	0.534	0.454	0.100558
H2-Q7	0.021874	-0.179406	0.155	0.305	0.100864
Itga9	0.0218788	0.185809	0.478	0.333	0.100864
Fkbp11	0.0220073	0.194095	0.671	0.617	0.101132
Ubash3b	0.0220657	0.194682	0.429	0.305	0.101132
Tesk1	0.0221119	0.17751	0.621	0.482	0.101132
Cebpg	0.0221202	0.184267	0.745	0.582	0.101132
Glmn	0.0221323	-0.102082	0.559	0.56	0.101132
Smurf2	0.0221759	0.172991	0.497	0.348	0.101132
Strap	0.0221774	0.17751	0.969	0.972	0.101132
Reep3	0.0221981	0.214523	0.845	0.844	0.101132
Nedd8	0.0224356	0.155038	1	1	0.102064
2610301B20Rik	0.022514	-0.119515	0.342	0.426	0.10227
S100a16	0.0225686	-0.136355	0.422	0.44	0.102368
Ppp2r2a	0.0226851	0.204683	0.913	0.894	0.102634
Snrpd3	0.0226935	0.163939	1	0.986	0.102634
Sema5a	0.0228408	-0.12817	0.292	0.333	0.10315
Zyg11b	0.0229343	0.193356	0.391	0.284	0.103421
Rtf1	0.0229734	0.175913	1	0.965	0.103447
Bcam	0.0230309	0.288712	0.72	0.688	0.103556
Qdpr	0.0231297	0.182565	0.876	0.809	0.103849
Phgdh	0.0232218	0.186863	0.988	0.993	0.104112
Nt5dc2	0.0234222	0.163505	1	1	0.104674
Ltv1	0.0234401	0.185191	0.727	0.631	0.104674
Cyb5b	0.0234486	0.176155	0.64	0.461	0.104674
Stk19	0.0236993	0.180496	0.547	0.433	0.105494
Mtfr1	0.0237005	0.17751	0.59	0.454	0.105494
Dcakd	0.0237964	0.181513	0.932	0.894	0.10577
Ppme1	0.0238409	0.180405	0.596	0.553	0.105815
Mxd4	0.0239354	0.221372	0.702	0.603	0.106083
Slc43a3	0.0239926	0.178568	0.422	0.284	0.106184
Eif4ebp2	0.0240466	0.21357	0.82	0.787	0.106271
Sec61b	0.0241762	0.16562	1	1	0.106692
Smarcd2	0.0242184	0.19181	0.689	0.546	0.106726
Dusp12	0.0243341	0.183304	0.478	0.404	0.106967
Zfp68	0.0243422	-0.102082	0.509	0.638	0.106967
Tmed2	0.0245113	0.176959	0.994	0.986	0.107558
Srp9	0.0246012	0.173422	0.957	0.979	0.107785
Cby1	0.0246381	0.184658	0.758	0.681	0.107785
Ddx1	0.0246674	0.178685	0.975	0.965	0.107785
Pes1	0.0247294	0.189387	0.665	0.553	0.107904
Trmt1	0.0248221	0.183941	0.783	0.723	0.108156
2022-03-02	0.0249217	0.187873	0.82	0.674	0.108437
Gtf2f2	0.0250109	0.172737	0.534	0.44	0.108673
Luc7l	0.025092	0.190537	0.882	0.801	0.108873
Hacd2	0.0254242	0.17401	0.658	0.475	0.110148
Zcchc6	0.0254758	0.189345	0.733	0.645	0.110148
Yme1l1	0.0255172	0.184102	0.832	0.787	0.110148
Fgfr1	0.0255836	0.213938	0.944	0.936	0.110148
Selenop	0.0255869	-0.1151	0.286	0.411	0.110148
Ssb	0.0255992	0.153829	1	1	0.110148
Rangap1	0.0257019	0.214526	0.839	0.851	0.110436
Nudcd2	0.0257777	0.193225	0.944	0.957	0.110524
BC004004	0.0257937	0.1738	0.441	0.326	0.110524
Pgm2l1	0.0262919	0.181552	0.491	0.355	0.112503
Rac1	0.026476	0.181522	0.963	0.965	0.113117
Lrrc40	0.0265084	-0.111412	0.348	0.447	0.113117
Aprt	0.026604	0.187584	0.975	0.972	0.113369
Tnpo3	0.0266803	0.20627	0.82	0.801	0.113538
Ctnnbip1	0.0267221	0.182824	0.925	0.83	0.11356
Cdk5rap1	0.0268418	-0.110666	0.435	0.482	0.113912
Ewsr1	0.0269482	0.176677	0.981	0.993	0.114207
Cdh2	0.0270098	0.194235	0.851	0.837	0.114312
Bmp7	0.0273025	0.189387	0.596	0.482	0.115332
Sgta	0.0273252	0.18009	0.957	0.887	0.115332
Dusp7	0.0277178	-0.107643	0.391	0.44	0.116645
Rap2a	0.0277274	0.173917	0.547	0.376	0.116645
Oip5	0.0277494	-0.127848	0.236	0.383	0.116645
Akap8	0.0277884	0.195747	0.758	0.695	0.116651
Rcor3	0.0278415	-0.123255	0.273	0.376	0.1167
Tmem109	0.0278754	0.174331	0.553	0.447	0.1167
Nck1	0.0280557	0.180762	0.696	0.645	0.117237
Ndufb4	0.0280793	0.1739	0.957	0.95	0.117237
Spen	0.028305	0.190377	0.696	0.61	0.117946
Akap13	0.0283254	0.202534	0.801	0.723	0.117946
Slain2	0.0285237	0.16746	0.54	0.404	0.118613
Copz2	0.0286263	0.177746	0.658	0.532	0.11888
Mmp14	0.0287316	0.181668	0.764	0.652	0.119133
Hook3	0.0287641	0.188024	0.764	0.652	0.119133
Keap1	0.0288361	0.194349	0.683	0.645	0.119271
2410002F23Rik	0.0290345	0.18013	0.72	0.709	0.119932
Polr2i	0.0292696	0.181013	0.932	0.872	0.120594
Sox11	0.0292726	0.196102	0.981	0.965	0.120594
Ddx3x	0.0293986	0.203047	0.913	0.894	0.120933
Trappc2l	0.0294329	0.180389	0.764	0.773	0.120933
Ppil2	0.0294851	0.181543	0.82	0.745	0.120986
Zfp503	0.0296705	0.218697	0.907	0.823	0.121586
Dusp2	0.0298906	-0.128715	0.385	0.454	0.122042
Plat	0.0298925	-0.104553	0.596	0.631	0.122042
1500009L16Rik	0.0299019	0.170305	0.671	0.475	0.122042
Sptlc2	0.0299401	0.185809	0.416	0.284	0.122042
Fam3c	0.0299955	0.17484	0.646	0.518	0.122042
Gmfb	0.0300182	0.173165	0.584	0.447	0.122042
Jpt2	0.0300721	0.173165	0.615	0.489	0.122101
Dnajc17	0.0301633	0.16282	0.46	0.298	0.122245
Malat1	0.0302101	-0.110556	1	1	0.122245
Psmc5	0.0302258	0.160428	1	0.986	0.122245
Thumpd1	0.0303069	0.190421	0.826	0.738	0.122247
Aatf	0.0303086	0.183414	0.739	0.638	0.122247
Elp5	0.0303704	0.179135	0.776	0.645	0.122247
Kpnb1	0.0303843	0.183522	0.963	0.922	0.122247
Anapc1	0.0308209	0.175583	0.689	0.574	0.123843
Trim35	0.0309378	0.207545	0.82	0.773	0.124021
Akap12	0.0309451	-0.170464	0.509	0.61	0.124021
Tspyl2	0.0313862	0.210829	0.354	0.227	0.125542
Zfp687	0.0314057	0.183427	0.404	0.277	0.125542
Rbm25	0.0314515	0.176694	0.988	0.993	0.125563
Rex1bd	0.0315433	0.185975	0.907	0.922	0.125767
Palld	0.0316461	-0.101473	0.652	0.709	0.126015
Sec24c	0.0317511	0.169024	0.509	0.376	0.126271
Psmd14	0.0320753	0.178792	0.882	0.816	0.12715
Zfp553	0.0321783	0.17973	0.745	0.617	0.12715
Ciz1	0.0321798	0.16746	0.547	0.376	0.12715
Hint1	0.0321902	0.140461	1	1	0.12715
Arpc1b	0.0322816	0.193995	0.801	0.752	0.12715
Ccdc12	0.0322893	0.179447	0.913	0.908	0.12715
Phf20	0.0322981	0.1798	0.82	0.745	0.12715
Rcbtb2	0.0323253	0.179211	0.925	0.823	0.12715
Rps27l	0.0323415	0.160994	0.988	0.993	0.12715
Enkd1	0.0325656	0.167278	0.484	0.34	0.127765
Daxx	0.0325806	0.180004	0.665	0.532	0.127765
Prr7	0.0327346	-0.127825	0.242	0.355	0.127834
Ppp1r1a	0.0327445	0.215662	0.727	0.603	0.127834
Ppp2r2d	0.0327591	0.177296	0.764	0.681	0.127834
Bag1	0.032763	0.165769	0.975	0.95	0.127834
Mrps5	0.0329098	0.177756	0.932	0.879	0.128245
Tmem97	0.0331897	0.174747	0.745	0.546	0.129173
Eif3a	0.0333013	0.175598	1	1	0.129367
Ogfrl1	0.033323	0.187441	0.727	0.695	0.129367
Canx	0.0334312	0.188939	0.988	0.986	0.129624
Sema4c	0.0334872	0.167842	0.453	0.284	0.129679
Rrp1	0.0335532	0.164844	0.969	0.986	0.129706
Ppp1r35	0.0335778	0.169468	0.671	0.539	0.129706
Pet100	0.0337816	0.180264	0.863	0.773	0.13033
Cryab	0.0339192	-0.316648	0.124	0.149	0.13061
Ankzf1	0.0339659	-0.114462	0.286	0.39	0.13061
Timp2	0.0339804	0.193341	0.894	0.83	0.13061
Tspan31	0.0340761	0.178468	0.789	0.674	0.130689
Hmg20a	0.0341079	0.170352	0.584	0.511	0.130689
Sec61a2	0.0341396	0.162617	0.627	0.447	0.130689
Abr	0.0341697	0.180071	0.621	0.574	0.130689
Slc50a1	0.0342337	0.182224	0.571	0.461	0.130772
Cdc42ep4	0.0342836	0.169853	0.429	0.312	0.130801
Serp2	0.0344689	0.196537	0.366	0.177	0.131346
Mrps35	0.0345904	0.178205	0.82	0.773	0.131515
Pdia3	0.0345982	0.172242	0.988	0.993	0.131515
Tagln	0.0346439	-0.141155	0.161	0.333	0.131528
1700123O20Rik	0.0347972	0.176901	0.826	0.688	0.131948
Mrps22	0.0349409	0.174086	0.77	0.66	0.132331
Rpn2	0.0350082	0.170751	0.963	0.929	0.132389
Commd9	0.035075	0.169986	0.615	0.468	0.132389
Lyar	0.0350843	0.176827	0.975	0.979	0.132389
Csad	0.0353373	0.171696	0.596	0.489	0.132938
Wdr45b	0.0354261	0.174922	0.839	0.78	0.132938
Hspa4	0.0354567	0.20648	0.975	0.957	0.132938
Cbll1	0.0354799	0.165315	0.584	0.454	0.132938
Arl2bp	0.0354867	0.178759	0.87	0.78	0.132938
Cul7	0.0354969	0.181849	0.503	0.44	0.132938
Baiap2l1	0.0355303	0.186746	0.416	0.284	0.132938
Ptcd3	0.035704	0.170482	0.665	0.546	0.133427
Arf4	0.035905	0.166576	0.963	0.979	0.134016
Fabp5	0.0360802	0.202365	0.994	0.986	0.134508
Mrpl4	0.0361636	0.177696	0.77	0.709	0.134657
Vrk1	0.0363241	0.175598	0.77	0.709	0.134947
Dnm2	0.0363284	0.172216	0.422	0.362	0.134947
Spidr	0.0364355	-0.112442	0.354	0.461	0.135182
Lsm12	0.0365943	0.172064	0.932	0.929	0.135384
Fez2	0.0366453	0.164018	0.453	0.298	0.135384
Ostc	0.0366714	0.171415	0.969	0.943	0.135384
Nt5c3b	0.0366752	0.179603	0.801	0.794	0.135384
Tm7sf3	0.0367084	-0.114125	0.298	0.383	0.135384
Tmem256	0.0370577	0.17455	0.963	0.922	0.13651
Pim1	0.0371175	-0.114407	0.578	0.645	0.136568
Scaf4	0.0374475	0.171489	0.447	0.369	0.137618
B3glct	0.037512	0.17933	0.366	0.241	0.137692
Lpcat1	0.0376151	0.162717	0.565	0.454	0.137739
Supt16	0.0376265	0.169793	0.988	0.957	0.137739
Shprh	0.0376581	0.167941	0.559	0.468	0.137739
Nr2f6	0.0377644	0.16868	0.901	0.887	0.137965
Sap18	0.0378174	0.171998	0.913	0.929	0.137996
Gpx8	0.0379321	0.168389	0.671	0.532	0.138251
Setd1a	0.038	0.162585	0.453	0.312	0.138336
Kras	0.0381163	0.176091	0.839	0.78	0.138433
Sos1	0.0381375	0.170691	0.453	0.362	0.138433
Crlf2	0.0381892	-0.102141	0.348	0.418	0.138433
Ywhah	0.0382325	0.165799	0.969	0.901	0.138433
Zfp207	0.0382501	0.171201	0.95	0.943	0.138433
Thoc5	0.0384402	0.160481	0.553	0.404	0.138959
Shisa3	0.0385637	-0.112442	0.497	0.496	0.139243
Apbb2	0.0386975	0.174381	0.41	0.27	0.139563
Osbp	0.0388429	0.168461	0.528	0.376	0.13989
Xpo6	0.0388785	0.164731	0.534	0.447	0.13989
Nek3	0.0391359	0.229711	0.304	0.113	0.140653
Cyr61	0.0394597	-0.17161	0.323	0.411	0.141563
Dcun1d1	0.0394806	0.188098	0.516	0.454	0.141563
Efs	0.0396109	0.166337	0.453	0.298	0.141785
Lnpep	0.0396627	0.178792	0.429	0.383	0.141785
Pin4	0.0396796	0.17376	0.901	0.837	0.141785
Ech1	0.0397389	0.169636	0.801	0.688	0.14183
Rbm39	0.0397837	0.138547	1	1	0.14183
Myl6	0.0398696	0.165589	1	1	0.141848
Srprb	0.0398803	0.168617	0.652	0.539	0.141848
Nhp2	0.0402886	0.175777	0.969	0.972	0.143136
Creb1	0.0403873	0.173291	0.652	0.596	0.143322
Hoxb8	0.0404673	0.176755	0.764	0.652	0.143441
Dnlz	0.040569	0.177908	0.776	0.681	0.143637
Ccng2	0.040709	0.181306	0.609	0.433	0.143883
Eif3l	0.0407495	0.158839	1	0.986	0.143883
4921524J17Rik	0.0407916	0.172191	0.727	0.589	0.143883
Adprh	0.040824	0.16857	0.801	0.688	0.143883
Gna11	0.0409438	0.177086	0.851	0.801	0.144141
Atp5f1	0.0410928	0.147184	1	1	0.144385
Ndufb3	0.0411063	0.165238	0.963	0.936	0.144385
Krit1	0.041163	0.174219	0.702	0.56	0.14442
Diexf	0.041224	0.176091	0.391	0.255	0.14447
1700037H04Rik	0.0414531	0.16746	0.652	0.504	0.145109
Smchd1	0.0420688	0.167689	0.925	0.887	0.147098
Hmga2	0.0421902	0.191043	0.932	0.894	0.147356
Amotl1	0.042427	0.186989	0.677	0.589	0.148017
Tnfaip2	0.0425437	-0.119572	0.292	0.298	0.148205
Vim	0.0426027	-0.116753	0.913	0.922	0.148205
Sbsn	0.0426534	-0.169202	0.155	0.277	0.148205
Lancl2	0.0427682	0.157474	0.478	0.348	0.148205
Six2	0.0427782	0.217736	0.95	0.957	0.148205
Ptpn9	0.0428379	0.163102	0.621	0.468	0.148205
Ppm1g	0.0428443	0.178817	0.925	0.837	0.148205
Azin1	0.0428966	0.176973	0.615	0.489	0.148205
Emc10	0.0429136	0.181013	0.882	0.858	0.148205
Ctbp2	0.0429593	0.174485	0.745	0.688	0.148205
Eif4a3	0.0433482	0.169867	0.969	0.957	0.14938
Mns1	0.043438	0.161217	0.814	0.652	0.149523
Bola2	0.0435268	0.165	0.957	0.965	0.149663
Cited1	0.0436624	0.3237	0.814	0.759	0.149962
Eif1ax	0.0438043	0.16183	0.994	1	0.150253
Txn2	0.0438451	0.170663	0.95	0.929	0.150253
Pcnt	0.043933	0.194716	0.677	0.652	0.150253
Gnb2	0.043941	0.154497	0.988	1	0.150253
Srsf1	0.0441172	0.183611	0.957	0.922	0.150689
Dhx34	0.0441918	0.203828	0.354	0.262	0.150778
Ube2a	0.0443231	0.170446	0.72	0.674	0.151059
Gas1	0.0444985	0.172272	0.975	0.943	0.151419
Tbc1d9b	0.0445265	-0.122743	0.211	0.333	0.151419
Dhcr24	0.044643	0.181849	0.354	0.234	0.151462
Ralgps2	0.0446922	0.176504	0.59	0.504	0.151462
Wdr83os	0.044735	0.166115	0.957	0.887	0.151462
Crabp1	0.0448014	-0.170385	0.186	0.291	0.151462
Git2	0.0448091	0.179075	0.72	0.631	0.151462
Crim1	0.0449067	-0.147533	0.193	0.291	0.151462
Mtdh	0.0449283	0.16269	0.981	0.993	0.151462
Dlst	0.0449301	0.17291	0.714	0.652	0.151462
Ncoa6	0.0450807	0.167648	0.435	0.284	0.151804
Rbm28	0.0451736	0.173205	0.901	0.837	0.151952
Hoxb5os	0.0453015	0.201273	0.609	0.489	0.152217
Zfx	0.0453749	0.167903	0.565	0.461	0.152298
Hsf2	0.0455105	0.158654	0.478	0.355	0.152588
Capn6	0.0456017	0.190454	0.925	0.894	0.152598
Csnk1g2	0.0456602	0.16651	0.913	0.887	0.152598
Nono	0.0456611	0.153727	0.988	0.993	0.152598
Mtcl1	0.0457548	-0.118256	0.242	0.348	0.152746
Pcyt2	0.0462867	0.162943	0.416	0.262	0.154355
Zfhx2	0.0466313	0.176033	0.559	0.482	0.155204
St3gal5	0.0466697	0.185809	0.59	0.468	0.155204
Hist1h2ae	0.0467107	0.218631	0.863	0.844	0.155204
Tmem9	0.0467416	0.180144	0.776	0.695	0.155204
Gspt1	0.0469751	0.170663	0.975	0.965	0.155731
Cul4a	0.0470429	0.162985	0.739	0.596	0.155731
Rpf1	0.0470673	0.166374	0.733	0.617	0.155731
Cbx5	0.04712	0.150075	0.957	0.95	0.155731
H13	0.0471515	0.173572	0.851	0.83	0.155731
Mrpl34	0.0472432	0.165537	0.975	0.965	0.155817
Rpp25l	0.0472782	0.167842	0.826	0.738	0.155817
Chmp4b	0.0474197	0.1736	0.857	0.858	0.156059
Cox7c	0.0474525	0.133716	1	1	0.156059
Gars	0.0476605	0.169442	0.888	0.858	0.156455
Zscan21	0.0476737	0.160481	0.497	0.44	0.156455
Gbf1	0.0477718	0.166672	0.54	0.496	0.156482
Prpf19	0.0478101	0.16606	0.919	0.95	0.156482
Phc2	0.0478335	0.166053	0.783	0.674	0.156482
Zbtb1	0.0479522	0.169636	0.559	0.482	0.156569
Swi5	0.0479612	0.157499	1	1	0.156569
Ostf1	0.0481644	0.159614	0.484	0.397	0.157067
Axin1	0.048298	0.158322	0.559	0.426	0.157337
Prkab1	0.048462	0.156325	0.46	0.262	0.157705
Thsd4	0.0485728	0.185343	0.398	0.248	0.157851
Phc3	0.0486793	0.161595	0.398	0.298	0.157851
Tmem147	0.0487164	0.170936	0.888	0.872	0.157851
Otud7b	0.0487187	0.15841	0.509	0.376	0.157851
Ccdc58	0.0487615	0.175254	0.807	0.738	0.157851
Polr3k	0.0488977	0.170389	0.894	0.794	0.158097
Atad1	0.0489398	0.151984	0.627	0.447	0.158097
Rasl11b	0.0491348	-0.174609	0.186	0.319	0.158562
Lman2l	0.0496315	0.15751	0.466	0.326	0.159627
Mrps6	0.0496644	0.170117	0.814	0.695	0.159627
Cdc5l	0.0496815	0.179387	0.876	0.901	0.159627
Iah1	0.0496965	0.18065	0.727	0.66	0.159627
Dcaf1	0.0497224	0.176857	0.665	0.582	0.159627
Snd1	0.0498721	0.165556	0.776	0.723	0.159942
Ankrd54	0.0499966	0.15719	0.559	0.489	0.160028
Snapc2	0.0500022	0.157474	0.491	0.326	0.160028
Pi4k2a	0.0500887	0.16273	0.602	0.546	0.160139
Eif5b	0.0503023	0.162456	0.994	1	0.160656
Uso1	0.0503638	0.150148	0.472	0.34	0.160687
Urod	0.050534	0.164832	0.826	0.738	0.160989
Thg1l	0.050641	0.159161	0.578	0.518	0.160989
Epm2aip1	0.0506429	0.170771	0.609	0.61	0.160989
Kif4	0.0506663	0.176956	0.783	0.667	0.160989
Capzb	0.0507652	0.160728	1	0.943	0.16102
Cnbp	0.05078	0.147738	1	1	0.16102
Sart1	0.0509951	0.17003	0.77	0.638	0.161537
Faf2	0.0511227	0.167796	0.758	0.723	0.161775
Med16	0.0512898	0.169172	0.658	0.574	0.162138
Ntf3	0.0513543	0.162232	0.634	0.539	0.162177
Ppp2r5a	0.0514487	0.15151	0.491	0.376	0.162232
Ints5.1	0.0515191	0.15625	0.484	0.34	0.162232
Polr2d	0.051533	0.164909	0.845	0.716	0.162232
Erp29	0.0515811	0.156225	0.975	0.965	0.162232
Coq8b	0.0516508	-0.112743	0.211	0.34	0.162286
Epop	0.0518131	0.157974	0.596	0.511	0.162567
Mrpl20	0.051845	0.163556	0.975	0.936	0.162567
Slirp	0.0519148	0.1654	0.925	0.879	0.162621
Gpn1	0.0523809	0.160232	0.764	0.631	0.163701
Ptk7	0.0525087	0.16254	0.789	0.702	0.163701
Rnf216	0.0525407	0.168879	0.652	0.546	0.163701
Slc25a13	0.0525482	0.161207	0.441	0.319	0.163701
Cop1	0.0525489	0.166039	0.801	0.716	0.163701
Plpp3	0.0525768	0.1838	0.714	0.582	0.163701
Fam208b	0.0529084	0.153869	0.484	0.369	0.164208
Dync1li1	0.0529295	0.166598	0.615	0.518	0.164208
Tcf3	0.053033	0.162421	0.944	0.95	0.164208
Hebp1	0.0530403	-0.1016	0.323	0.39	0.164208
Fhl2	0.0530524	-0.110666	0.323	0.383	0.164208
Gja1	0.0530575	0.25183	0.671	0.66	0.164208
Rtf2	0.0531986	0.169222	0.739	0.716	0.164379
Mtpn	0.0532189	0.166714	0.876	0.787	0.164379
Trappc1	0.0533743	0.170911	0.801	0.752	0.164632
Set	0.0534183	0.166417	1	1	0.164632
Aurkaip1	0.0534602	0.155351	0.975	0.965	0.164632
Fmc1	0.0535301	0.169178	0.87	0.794	0.164684
Gsk3b	0.0536083	0.172064	0.938	0.901	0.164761
Ten1	0.0536919	0.174288	0.82	0.73	0.164854
Taf10	0.0539404	0.164486	0.95	0.936	0.165453
Slc12a2	0.0540128	0.203828	0.795	0.66	0.165511
Qars	0.0540824	0.16811	0.82	0.766	0.165561
Kat6a	0.0542295	0.19519	0.671	0.617	0.165847
Srsf5	0.0543747	0.148309	0.994	0.993	0.166127
Nav1	0.0544662	0.192778	0.422	0.291	0.166243
Uqcrc2	0.0547617	0.163647	0.988	0.993	0.16698
Surf1	0.0549057	0.151653	0.553	0.433	0.167254
Melk	0.0552018	0.164202	0.739	0.688	0.167991
Wdr82	0.0553063	0.166298	0.683	0.61	0.168144
Gm37494	0.0555121	0.153781	0.435	0.312	0.168605
Acbd3	0.0555887	0.172155	0.776	0.759	0.168628
Taf1	0.0556288	0.183476	0.727	0.631	0.168628
Trappc13	0.0558757	0.161727	0.745	0.645	0.169211
Sav1	0.0559419	0.157248	0.578	0.411	0.169246
Ring1	0.0561692	0.152995	0.615	0.489	0.169768
Me2	0.0565199	0.176323	0.714	0.709	0.170661
Dmtf1	0.0566839	0.158045	0.59	0.496	0.170832
Ppm1a	0.0567033	0.161993	0.839	0.787	0.170832
Fads1	0.0568173	0.158119	0.559	0.496	0.170832
Arhgap35	0.0568362	0.149287	0.491	0.418	0.170832
Bud31	0.056852	0.165686	0.801	0.809	0.170832
Bcorl1	0.0572029	-0.118256	0.273	0.326	0.171719
Egln2	0.0572828	0.164125	0.789	0.73	0.171793
Ndn	0.0573487	0.160468	0.894	0.865	0.171824
Azi2	0.0574806	0.152969	0.596	0.525	0.172053
Tipin	0.0577254	0.171625	0.888	0.83	0.172619
Asnsd1	0.0579384	0.155038	0.621	0.489	0.172852
Nup160	0.0580006	0.151299	0.447	0.34	0.172852
2022-09-09	0.0580043	0.158045	0.596	0.482	0.172852
Zfp652	0.0580265	0.153945	0.528	0.44	0.172852
Cnot2	0.0580934	0.160441	0.745	0.631	0.172885
Ubtf	0.0582196	0.19054	0.963	0.922	0.172993
Snrpa	0.0582414	0.187873	0.963	0.929	0.172993
Gtf2f1	0.0583492	0.165756	0.77	0.645	0.173147
Pdrg1	0.0586256	0.155038	0.733	0.589	0.173722
Meox2	0.0586549	-0.112898	0.646	0.638	0.173722
Napa	0.0587399	0.167963	0.87	0.794	0.173807
Tmem42	0.0589284	0.144566	0.509	0.418	0.174021
Snap23	0.058957	0.152057	0.646	0.553	0.174021
Mrpl48	0.0589806	0.168025	0.888	0.844	0.174021
Insig1	0.0590599	0.183693	0.317	0.177	0.174089
Sc5d	0.0601316	0.163771	0.348	0.199	0.17708
Noc4l	0.0605052	0.157812	0.677	0.574	0.17801
Mcrs1	0.0607021	0.161864	0.851	0.844	0.178353
Ermp1	0.0607368	-0.118046	0.224	0.355	0.178353
Anp32b	0.0608887	0.144798	1	1	0.17863
Kat14	0.0611181	0.161808	0.379	0.262	0.179018
Clptm1l	0.0611365	0.149067	0.658	0.489	0.179018
Mob4	0.0612108	0.167842	0.826	0.773	0.179066
Kif13b	0.061394	-0.13795	0.155	0.284	0.179433
Kif1b	0.0616339	0.17396	0.665	0.61	0.179801
Pdia5	0.061636	0.17419	0.342	0.241	0.179801
Usp47	0.061966	0.165315	0.807	0.752	0.180593
Taf3	0.0623477	0.164916	0.627	0.574	0.181443
Mrpl28	0.0623746	0.157801	0.957	0.95	0.181443
Zfp820	0.0625417	-0.127423	0.174	0.298	0.181758
Tyw1	0.0627301	0.150773	0.578	0.454	0.182135
Rnpep	0.0628411	0.149365	0.516	0.39	0.182278
Ier3ip1	0.062897	0.160739	0.944	0.894	0.182278
Zfp710	0.0631441	0.157843	0.373	0.227	0.182748
Mdp1	0.0631771	0.152943	0.584	0.504	0.182748
Parl	0.0633776	0.160801	0.795	0.723	0.183056
Kif5b	0.0634019	0.154474	0.938	0.95	0.183056
Wrap73	0.0635519	0.149516	0.522	0.447	0.183318
Unc119	0.0636943	0.166598	0.789	0.766	0.183558
Sfr1	0.0637827	0.159544	1	0.993	0.183642
Gnl2	0.0638569	0.162216	0.826	0.667	0.183685
Shisa2	0.0640901	0.180484	0.59	0.56	0.184185
Tagln2	0.064278	0.16746	0.516	0.426	0.184554
Lsr	0.0645615	0.148573	0.422	0.291	0.184955
Gucy1a1	0.0647249	-0.118914	0.23	0.348	0.184955
Mcts1	0.0647743	0.15735	0.739	0.674	0.184955
Rbmx	0.0649167	0.168248	0.87	0.837	0.184955
Slc25a5	0.0649443	0.175962	0.975	0.986	0.184955
Thoc7	0.0649647	0.150036	0.988	0.986	0.184955
Clns1a	0.0649672	0.16026	0.95	0.922	0.184955
Tor1aip1	0.064987	0.153177	0.683	0.574	0.184955
Mllt10	0.0649914	0.16276	0.807	0.723	0.184955
Amotl2	0.0650149	0.163497	0.404	0.333	0.184955
Ak2	0.0652013	0.156472	0.981	0.957	0.185315
Arl16	0.0653144	0.151184	0.435	0.298	0.185413
Trappc12	0.0653554	0.149761	0.422	0.291	0.185413
Sh3glb2	0.0655764	0.148688	0.59	0.447	0.18566
H2afj	0.0655844	0.168389	0.901	0.894	0.18566
Znrf3	0.0656223	0.17673	0.348	0.17	0.18566
Spc24	0.0657723	0.153977	0.981	0.943	0.185794
Zfp664	0.0657895	0.163674	0.882	0.823	0.185794
Nap1l4	0.0659518	0.159532	0.938	0.936	0.186053
Utp18	0.0660015	0.164794	0.689	0.674	0.186053
Cwc15	0.066103	0.162155	0.963	0.943	0.186118
Amd1	0.0661636	0.158748	0.671	0.617	0.186118
Aen	0.0663681	0.153019	0.571	0.525	0.186118
Mtg2	0.0663886	0.142946	0.478	0.362	0.186118
Adipor2	0.0664034	0.152889	0.578	0.397	0.186118
Rilpl2	0.0665038	0.140853	0.509	0.355	0.186118
Pgs1	0.0665379	0.145692	0.528	0.411	0.186118
Calm2	0.0665456	0.164678	1	1	0.186118
Fcf1	0.066592	0.163902	0.801	0.809	0.186118
Ccnf	0.0666606	0.156923	0.571	0.397	0.186118
Zfp622	0.0667082	0.160816	0.739	0.624	0.186118
Paxip1	0.0667561	0.141244	0.472	0.411	0.186118
Myc	0.0668492	0.175806	0.578	0.461	0.186118
Zfp593	0.0669198	0.155038	0.602	0.582	0.186118
Nlk	0.0669257	0.163476	0.354	0.227	0.186118
Rspo1	0.0670967	0.193773	0.894	0.858	0.186427
Twf1	0.0671595	0.147159	0.497	0.426	0.186434
Ogdh	0.0672721	0.159743	0.627	0.546	0.186579
Zc3h7b	0.0676522	0.15879	0.596	0.539	0.187466
Ctxn1	0.0680488	0.173957	0.981	0.936	0.188374
Mbtps1	0.0681018	0.16595	0.702	0.645	0.188374
Lcmt1	0.068327	0.155857	0.758	0.645	0.188829
Rbm14	0.0685133	0.15711	0.547	0.454	0.188834
Pycard	0.068581	-0.113132	0.242	0.333	0.188834
Mrto4	0.0685946	0.160962	0.925	0.908	0.188834
Pdcd11	0.0686189	0.161207	0.814	0.794	0.188834
Mylip	0.068672	0.170542	0.366	0.284	0.188834
Ndufc2	0.0686946	0.147762	0.994	0.993	0.188834
Bzw1	0.0688078	0.15169	0.994	0.993	0.188977
Dynll2	0.0689149	0.192282	0.851	0.83	0.189104
Mut	0.0691096	0.147264	0.528	0.411	0.189352
Chchd10	0.0691276	0.179669	0.758	0.752	0.189352
Bcl7c	0.0693372	0.160369	0.969	0.894	0.189659
Brk1	0.0694859	0.161958	0.932	0.915	0.189659
Pop7	0.0695413	0.162155	0.689	0.596	0.189659
Mcm3	0.0696054	0.173635	0.839	0.78	0.189659
Nelfa	0.0696515	0.151381	0.615	0.553	0.189659
Celf1	0.0696558	0.164326	0.913	0.858	0.189659
Snw1	0.0696681	0.164854	0.981	0.965	0.189659
Bdp1	0.069968	0.165016	0.764	0.695	0.190267
Kmt5c	0.0700304	0.14345	0.516	0.426	0.190267
Prkra	0.0700902	0.165154	0.826	0.816	0.190267
Zfp84	0.0701372	0.157666	0.398	0.284	0.190267
2510039O18Rik	0.070221	0.149922	0.429	0.326	0.190328
Cmtm3	0.0703072	0.158553	0.652	0.624	0.190395
Arpc5	0.0704534	0.163023	0.826	0.702	0.190508
Brd1	0.0704821	0.175446	0.87	0.816	0.190508
Anxa6	0.0705335	0.161824	0.602	0.518	0.190508
Tnrc18	0.0707926	0.160932	0.646	0.596	0.191041
Gprasp1	0.0708654	0.157751	0.596	0.532	0.191071
Itga8	0.0710701	0.17751	0.72	0.652	0.191394
Gfer	0.0711208	0.156575	0.764	0.638	0.191394
Btbd9	0.071203	0.141981	0.491	0.362	0.191394
Rab12	0.0712322	0.154223	0.708	0.645	0.191394
Col13a1	0.0713601	0.155038	0.46	0.418	0.191572
Fam8a1	0.0714505	0.162364	0.429	0.319	0.191648
Asap1	0.0715294	0.166679	0.814	0.766	0.191694
Scamp1	0.0718308	0.152143	0.366	0.17	0.192182
Arid2	0.0718354	0.166136	0.739	0.66	0.192182
Ing1	0.0719776	0.176254	0.832	0.83	0.192396
Rbm27	0.0720917	0.160391	0.764	0.667	0.192535
Rsl24d1	0.0724344	0.172737	0.826	0.801	0.193004
Arhgap11a	0.0724671	0.173635	0.634	0.589	0.193004
Taf5	0.0724825	0.142849	0.553	0.454	0.193004
Ctdsp1	0.0725166	0.148995	0.621	0.447	0.193004
Hoxb9	0.0733461	0.172318	0.876	0.809	0.194503
Haghl	0.0733602	0.169456	0.559	0.426	0.194503
Traf3ip1	0.0734383	0.15641	0.36	0.255	0.194503
Ube2r2	0.0734708	0.156057	0.981	0.943	0.194503
Nacc1	0.0735445	0.156748	0.683	0.603	0.194503
Tor1aip2	0.073651	0.149588	0.503	0.475	0.194503
Abcf1	0.0736752	0.163029	0.957	0.95	0.194503
Efna2	0.0737342	0.147159	0.522	0.376	0.194503
Zfp932	0.0738253	0.145635	0.404	0.291	0.194503
Polr1c	0.0738305	0.162585	0.851	0.801	0.194503
Dgcr6	0.0738514	0.161638	0.863	0.844	0.194503
Ncoa2	0.0738564	0.145281	0.46	0.333	0.194503
Actr1b	0.074009	0.157012	0.609	0.518	0.194503
Thoc1	0.0740184	0.149274	0.671	0.574	0.194503
Tsr1	0.0740217	0.153044	0.571	0.525	0.194503
Lrrc75a	0.0740941	0.141615	0.547	0.39	0.194528
Ppp2ca	0.0748199	0.149242	0.988	0.986	0.19601
Purb	0.074919	0.147802	0.994	0.993	0.19601
Lyrm2	0.0749322	0.149588	0.658	0.553	0.19601
Atp5a1	0.075	0.125068	1	1	0.19601
Psmc3ip	0.0750143	0.156547	0.727	0.638	0.19601
Scfd1	0.0750966	0.148336	0.646	0.582	0.19601
Ywhaz	0.0751012	0.158928	0.975	0.993	0.19601
Hist1h1c	0.0752821	-0.111882	0.634	0.681	0.196083
Mrps18b	0.0752992	0.158073	0.752	0.645	0.196083
Ddx39b	0.0753191	0.140415	1	1	0.196083
Vcan	0.0755498	0.140604	0.988	0.979	0.196518
Hif1a	0.0757401	0.166598	0.863	0.809	0.196839
Exosc4	0.0758002	0.160537	0.826	0.759	0.196839
Mapkapk2	0.0759636	0.162473	0.714	0.73	0.197098
Brms1	0.0760933	0.143914	0.54	0.418	0.1971
Stk24	0.0761421	0.156731	0.689	0.674	0.1971
Hmgn1	0.0761553	0.139846	1	1	0.1971
Atg5	0.0762209	0.154037	0.547	0.475	0.197105
Lhfp	0.076538	0.157751	0.64	0.511	0.197558
Ecd	0.0765629	0.15589	0.671	0.631	0.197558
Taf1d	0.0765872	0.154519	0.988	0.979	0.197558
Rab10	0.0767118	0.156649	0.87	0.773	0.197577
Atp1b1	0.0767221	-0.136528	0.342	0.44	0.197577
Tgoln1	0.07701	0.145947	0.534	0.433	0.197971
Nbl1	0.077038	0.15932	0.466	0.39	0.197971
Atp6v0e2	0.0770667	0.157796	0.379	0.234	0.197971
Ggnbp2	0.0772073	0.158089	0.845	0.759	0.19808
Sumo3	0.0772373	0.149431	0.963	0.943	0.19808
Chtop	0.0773969	0.156681	0.876	0.83	0.198292
Smu1	0.0774479	0.163681	0.876	0.83	0.198292
Abhd14b	0.0779192	-0.112543	0.217	0.305	0.199334
Hes1	0.0780587	0.209762	0.733	0.652	0.199526
Hnrnpu	0.0782018	0.18542	1	1	0.199704
Rgmb	0.0782572	0.18636	0.304	0.142	0.199704
Cbx1	0.0783681	0.151894	0.994	0.993	0.199715
Golga7	0.0783905	0.155038	0.839	0.773	0.199715
Fam49b	0.0785534	0.155038	0.758	0.652	0.19984
Tsen34	0.0785686	0.150238	0.963	0.957	0.19984
Setd7	0.0786777	0.16811	0.329	0.191	0.199954
Mrps34	0.0788031	0.158217	0.876	0.766	0.200108
Pou2f1	0.0791529	0.150981	0.559	0.454	0.200832
Mapk6	0.0792868	0.14797	0.472	0.39	0.201007
Zfp281	0.0799088	0.14471	0.484	0.376	0.202115
Ubfd1	0.0799247	0.151607	0.689	0.617	0.202115
Cox4i1	0.0799271	0.134633	1	1	0.202115
Pcbp2	0.0799848	0.146852	0.994	1	0.202115
Uxs1	0.0801031	0.139289	0.46	0.348	0.202173
Nme2	0.0803738	0.145929	0.398	0.319	0.202173
Nup214	0.0803921	0.145618	0.547	0.482	0.202173
Lamtor1	0.0804038	0.156989	0.876	0.894	0.202173
Qrich1	0.080422	0.156748	0.665	0.652	0.202173
Nob1	0.0804469	0.153488	0.727	0.695	0.202173
Ino80	0.0805279	0.147366	0.516	0.454	0.202173
Slc25a17	0.0806391	0.155038	0.745	0.702	0.202173
Akirin2	0.0806575	0.174691	0.919	0.915	0.202173
Abcd4	0.0806603	-0.132644	0.168	0.277	0.202173
Dcaf13	0.0808439	0.149588	0.64	0.56	0.202469
Wwp2	0.0810168	0.139289	0.484	0.34	0.202604
Pdlim7	0.0810286	0.144865	0.559	0.482	0.202604
Cdk1	0.0811185	0.169636	0.919	0.851	0.202665
Bcap31	0.0812385	0.152943	0.901	0.851	0.202802
Ccdc86	0.0818193	0.15353	0.727	0.695	0.204087
Wrnip1	0.0819499	0.147194	0.429	0.27	0.204248
Golga3	0.0824721	0.152416	0.398	0.277	0.205018
Chsy1	0.0825645	0.142584	0.441	0.355	0.205018
Gtf2h1	0.082612	0.142343	0.484	0.404	0.205018
Sin3a	0.0826463	0.154094	0.658	0.574	0.205018
Ppp3ca	0.0827451	0.195692	0.888	0.78	0.205018
Psma4	0.0827553	0.146144	1	0.986	0.205018
Gtf2ird1	0.082856	0.143061	0.627	0.489	0.205018
Mrpl27	0.082887	0.157992	0.77	0.695	0.205018
Reep4	0.0828877	0.161313	0.596	0.546	0.205018
Stau2	0.0829207	0.151299	0.621	0.525	0.205018
Limd1	0.0830462	0.149588	0.652	0.589	0.205165
Rdh10	0.0831524	0.200898	0.578	0.525	0.205167
0610010K14Rik	0.0831862	0.15756	0.677	0.617	0.205167
Borcs7	0.0832456	0.16208	0.658	0.553	0.205167
Plod3	0.08333	0.140853	0.497	0.39	0.205199
Plekhg6	0.0834411	0.249783	0.267	0.121	0.205199
Prodh	0.0834573	0.16519	0.379	0.284	0.205199
Ndufaf4	0.0837117	0.16282	0.652	0.61	0.205661
Ip6k2	0.084	0.164043	0.689	0.574	0.206206
Ripply2	0.0843977	-0.127754	0.193	0.319	0.20663
Ccdc91	0.0844066	0.142343	0.491	0.418	0.20663
Rpgr	0.0844365	0.140469	0.609	0.475	0.20663
Tfpi	0.0844628	0.1671	0.36	0.277	0.20663
Cdyl	0.0845635	0.145107	0.584	0.461	0.20663
E130309D02Rik	0.0845735	0.143609	0.41	0.348	0.20663
Pxmp2	0.084718	0.165462	0.329	0.17	0.20663
Max	0.0847336	0.14694	0.658	0.603	0.20663
Rabgef1	0.0849347	0.145157	0.354	0.241	0.20663
Slc25a46	0.0849499	0.136688	0.509	0.397	0.20663
Qtrt1	0.0849798	0.14863	0.671	0.582	0.20663
Agfg2	0.0850229	0.152534	0.416	0.284	0.20663
Ddx39	0.0850481	0.156775	0.938	0.901	0.20663
Tomm34	0.0851282	0.136688	0.547	0.426	0.20663
Ufm1	0.0851734	0.157416	0.708	0.624	0.20663
Hexim1	0.0852647	0.158045	0.522	0.475	0.20669
Ythdc1	0.0854996	0.178815	0.938	0.936	0.206966
Capn10	0.0855994	0.137111	0.422	0.319	0.206966
Zfp148	0.0856345	0.166211	0.87	0.766	0.206966
Dus1l	0.0856458	0.147355	0.683	0.596	0.206966
Eloa	0.0858909	0.141628	0.565	0.482	0.20731
Gart	0.0859835	0.156944	0.826	0.766	0.20731
Pigf	0.0860229	0.143317	0.565	0.482	0.20731
Smn1	0.0860559	0.162055	0.832	0.801	0.20731
Selenon	0.086225	0.149442	0.503	0.397	0.207431
Nubp2	0.08624	0.141398	0.447	0.362	0.207431
Polr1e	0.086405	0.144342	0.385	0.291	0.207661
Twf2	0.0864696	0.151124	0.584	0.504	0.207661
Hsp90b1	0.0867268	0.199836	1	1	0.208117
Ndufa12	0.0868338	0.154853	1	0.993	0.208117
Chst1	0.0868869	-0.127894	0.199	0.248	0.208117
Mob1a	0.086928	0.140649	0.578	0.496	0.208117
Tmem165	0.0870204	0.166274	0.95	0.837	0.208177
Cers2	0.0873164	0.141659	0.758	0.596	0.208724
Arl1	0.0875933	0.155833	0.969	0.95	0.20922
Cirbp	0.0876588	0.155617	0.87	0.809	0.20922
Ccdc28b	0.0878264	0.145849	0.602	0.482	0.209458
Slc38a1	0.0886126	0.15611	0.845	0.773	0.211171
Letm2	0.0888245	-0.122492	0.186	0.284	0.211476
Ndc80	0.0889067	0.139938	0.702	0.61	0.211476
Tax1bp3	0.0889994	0.146527	0.559	0.454	0.211476
Gm26853	0.0890139	0.15224	0.348	0.227	0.211476
Prelid3b	0.0891314	0.157751	0.602	0.525	0.211479
Ubxn8	0.0891516	0.1422	0.391	0.305	0.211479
Scaf1	0.0892673	0.149922	0.708	0.596	0.211591
Mvd	0.0898997	0.140439	0.447	0.362	0.212927
Tusc2	0.0899856	0.136484	0.441	0.369	0.212968
Polr2b	0.0900632	0.163311	0.739	0.688	0.212989
Nfkbib	0.0902281	0.141615	0.522	0.383	0.213062
Hdac6	0.0903065	0.145635	0.379	0.27	0.213062
1600014C10Rik	0.090356	0.192439	0.311	0.128	0.213062
Stard3	0.090386	0.14375	0.559	0.511	0.213062
Rhod	0.090498	0.15224	0.342	0.213	0.213062
Trim8	0.0905067	0.144061	0.516	0.433	0.213062
Trim33	0.0908228	0.149688	0.696	0.716	0.213644
Gm16286	0.091057	0.149497	0.919	0.872	0.213871
Arhgef1	0.0910574	0.144739	0.547	0.511	0.213871
Rbfa	0.0914199	0.14863	0.646	0.525	0.214523
Cald1	0.0914733	0.212357	0.87	0.809	0.214523
Dpp9	0.0916019	0.14093	0.528	0.433	0.214662
Usf1	0.0918504	0.14775	0.553	0.454	0.215039
Dyrk1a	0.0919016	0.141981	0.478	0.376	0.215039
Apex1	0.0920552	0.168858	0.975	0.972	0.215102
Ralbp1	0.0920743	0.156507	0.913	0.851	0.215102
Gnai1	0.0921369	-0.108547	0.23	0.326	0.215102
Ramp2	0.0922685	0.203252	0.888	0.823	0.215247
Timm8a1	0.09274	0.158707	0.845	0.823	0.216184
Fbxo22	0.0929149	0.155038	0.733	0.773	0.216429
Cdca7	0.0931096	0.182183	0.783	0.745	0.216719
Zcchc14	0.0934143	0.14	0.441	0.348	0.217261
Ltbr	0.093503	0.148573	0.41	0.277	0.217261
Msrb1	0.0936505	0.15038	0.609	0.518	0.217261
Tbc1d15	0.0936576	0.149026	0.702	0.645	0.217261
Taf2	0.0936928	0.133376	0.478	0.355	0.217261
Ndufa2	0.0939937	0.147858	0.988	1	0.217795
Ctu2	0.0942399	0.144478	0.516	0.475	0.218044
Dhcr7	0.0942817	0.145322	0.366	0.241	0.218044
Coq7	0.0943228	0.148826	0.95	0.936	0.218044
Gabpb2	0.0943825	0.13562	0.522	0.376	0.218044
Fibp	0.094534	0.149891	0.913	0.865	0.218129
Arf2	0.0945602	0.137784	0.404	0.255	0.218129
Erp44	0.0948098	0.144987	0.64	0.574	0.218427
Pabpn1	0.0948304	0.161181	0.932	0.908	0.218427
Dut	0.0949738	0.162473	0.975	0.979	0.218595
Eif6	0.0952826	0.155038	0.963	0.936	0.219039
Rad51ap1	0.0953081	0.15357	0.72	0.645	0.219039
Nasp	0.0954604	0.166349	0.994	0.993	0.219226
Tmem167	0.0957299	0.153033	0.981	0.986	0.219502
Hsd17b4	0.0957501	0.142584	0.758	0.61	0.219502
Krtcap2	0.0958356	0.146514	0.975	0.979	0.219502
Ltbp1	0.0958638	0.213335	0.702	0.695	0.219502
Txlna	0.0960345	0.153644	0.72	0.745	0.219503
Sdhaf1	0.096043	0.147276	0.708	0.681	0.219503
Ddx54	0.0961143	0.14882	0.801	0.73	0.219503
Angel2	0.0961475	0.152584	0.702	0.645	0.219503
Pdzd11	0.0967102	0.148586	0.745	0.61	0.220519
Mcfd2	0.0967349	0.134878	0.609	0.504	0.220519
Suclg1	0.0968888	0.161359	0.963	0.979	0.220707
Gtf2b	0.0971163	0.148995	0.77	0.674	0.220933
Anln	0.0971305	0.167796	0.652	0.624	0.220933
Cdca7l	0.0973163	0.139289	0.627	0.553	0.221043
Sh3gl1	0.0973444	0.147817	0.646	0.532	0.221043
Fgf1	0.0973929	0.155038	0.335	0.22	0.221043
Kdm2a	0.0978094	0.158279	0.77	0.73	0.221826
Dnajc7	0.0982328	0.160025	0.957	0.95	0.222336
Glyr1	0.0982581	0.149296	0.857	0.766	0.222336
Setd2	0.0984057	0.174349	0.696	0.702	0.222336
Dlk1	0.0985283	0.233191	0.248	0.106	0.222336
Ndufa3	0.098648	0.152092	0.975	0.943	0.222336
Uqcrfs1	0.0986797	0.142608	1	0.965	0.222336
Ppp4r3a	0.0987029	0.158494	0.77	0.759	0.222336
U2af1	0.0987092	0.135075	1	0.986	0.222336
Kcnq1ot1	0.0987373	0.20712	0.981	0.957	0.222336
1110059G10Rik	0.0987524	0.136576	0.596	0.468	0.222336
Lrrc47	0.0991038	0.138852	0.497	0.404	0.222664
2410004B18Rik	0.0991155	0.133184	0.652	0.546	0.222664
Mapk12	0.0991303	0.148672	0.404	0.27	0.222664
Rsrc2	0.0991853	0.136989	0.994	0.986	0.222664
Kif18a	0.0993127	0.141288	0.559	0.447	0.222788
Selenoh	0.0994248	0.139289	1	1	0.222818
Ppm1b	0.0996674	0.15101	0.696	0.652	0.222818
Nsfl1c	0.0996889	0.160153	0.919	0.922	0.222818
Parva	0.0997046	0.154181	0.72	0.567	0.222818
Polg	0.0997071	0.140535	0.379	0.284	0.222818
Tbc1d10b	0.0998179	0.138852	0.503	0.348	0.222818
Kars	0.0998607	0.150038	0.857	0.787	0.222818
Ppp2r1b	0.0999015	0.153583	0.335	0.191	0.222818
Tarbp2	0.100041	0.138908	0.602	0.518	0.22292
Snf8	0.100091	0.155038	0.845	0.787	0.22292
Mrpl11	0.100674	0.147057	0.957	0.929	0.224058
Anapc16	0.10087	0.152217	0.789	0.709	0.224114
Apoo	0.100882	0.148117	0.714	0.567	0.224114
Dcaf5	0.100916	0.15641	0.342	0.262	0.224114
Ddx18	0.10112	0.157534	0.925	0.929	0.224405
Stk4	0.101661	0.142134	0.528	0.461	0.225444
Atp5g3	0.101754	0.143172	1	1	0.225489
Smad6	0.101982	0.179875	0.292	0.177	0.225771
Man1a2	0.102027	0.159492	0.807	0.809	0.225771
Plscr3	0.102347	0.14428	0.615	0.525	0.226017
Anapc11	0.102445	0.148153	0.944	0.901	0.226017
Cadm1	0.102673	0.148258	0.807	0.794	0.226017
Klhl9	0.102678	0.142109	0.609	0.496	0.226017
Eloc	0.102679	0.149922	0.957	0.979	0.226017
Fam103a1	0.102704	0.148768	0.783	0.773	0.226017
Pcp4	0.102719	0.320765	0.497	0.454	0.226017
Api5	0.102746	0.149257	0.776	0.709	0.226017
Crnkl1	0.102795	0.140045	0.609	0.525	0.226017
Cdk11b	0.10292	0.146841	0.907	0.83	0.226131
Ppil3	0.103297	0.141941	0.621	0.546	0.226799
Mcam	0.103385	0.15641	0.329	0.255	0.226803
Dcun1d5	0.103445	0.152092	0.944	0.943	0.226803
Lrrc59	0.103662	0.15601	0.894	0.844	0.227083
Ints9	0.103719	0.151299	0.435	0.326	0.227083
Bfar	0.103847	0.152654	0.708	0.638	0.227201
Yars2	0.104147	0.134559	0.547	0.397	0.227697
Ankib1	0.104287	0.145481	0.354	0.234	0.227843
Atxn7l3	0.104578	0.130504	0.441	0.319	0.228318
Mum1l1	0.104717	-0.127529	0.186	0.262	0.228382
Msmo1	0.104755	0.191048	0.435	0.326	0.228382
Chd8	0.104888	0.168866	0.776	0.809	0.228412
Nup35	0.104916	0.136138	0.503	0.447	0.228412
Srf	0.105002	0.132732	0.422	0.355	0.228432
Rnase12	0.105073	0.254336	0.23	0.184	0.228432
Tra2b	0.105165	0.147937	0.988	1	0.228473
Glg1	0.105347	0.158553	0.826	0.78	0.228706
Wdr4	0.105541	0.139499	0.509	0.411	0.22886
Atp5h	0.105565	0.132107	1	1	0.22886
Dnttip2	0.105711	0.153039	0.919	0.908	0.229016
Nsmce2	0.105872	0.150279	0.932	0.858	0.229137
Ptpra	0.105915	0.149627	0.845	0.801	0.229137
Ssbp1	0.106247	0.144009	0.975	0.936	0.229694
Med19	0.106377	0.16255	0.832	0.83	0.229811
Usf2	0.106449	0.149588	0.888	0.837	0.229811
Mrpl13	0.106551	0.146069	0.975	0.95	0.229872
Rab5a	0.106713	0.144675	0.727	0.603	0.23003
Clock	0.106833	0.133507	0.516	0.404	0.23003
Tlk2	0.106847	0.1489	0.615	0.574	0.23003
Pop1	0.107061	0.149404	0.348	0.191	0.230119
Eif3b	0.107096	0.154215	0.95	0.901	0.230119
Serpinb6a	0.107111	0.157682	0.857	0.851	0.230119
Mrps21	0.107336	0.14775	0.957	0.95	0.230166
Dnajc13	0.107463	0.145224	0.59	0.454	0.230166
Trappc8	0.107519	0.145322	0.36	0.241	0.230166
Dchs1	0.107564	0.138882	0.553	0.454	0.230166
Eif4h	0.107712	0.155281	0.994	0.972	0.230166
Nop56	0.107718	0.141612	0.994	0.986	0.230166
Col18a1	0.107767	0.147095	0.658	0.617	0.230166
Dxo	0.107795	0.140223	0.59	0.504	0.230166
Hoxb2	0.107802	0.168629	0.876	0.794	0.230166
Nucks1	0.107883	0.163974	1	1	0.230179
Tspo	0.108114	0.131952	0.578	0.418	0.230343
Cyc1	0.108245	0.146098	0.981	0.957	0.230343
Atp11a	0.108268	-0.106803	0.193	0.284	0.230343
Ptpn2	0.108364	0.140865	0.739	0.702	0.230343
Zfp777	0.108419	0.162036	0.329	0.206	0.230343
Hagh	0.108497	0.137646	0.621	0.546	0.230343
Arid3a	0.1086	0.156457	0.311	0.213	0.230343
Col4a1	0.108624	0.169706	0.944	0.858	0.230343
Mrpl46	0.108629	0.141923	0.745	0.695	0.230343
Hacd3	0.108867	0.137646	0.41	0.348	0.230691
Hsd17b12	0.108995	0.150653	0.845	0.78	0.230804
Mad1l1	0.10919	0.128239	0.484	0.369	0.231059
Cox7b	0.109333	0.145419	0.994	1	0.231205
Alg13	0.109593	0.125813	0.491	0.404	0.231595
Homer2	0.110093	0.134094	0.398	0.277	0.232257
Ncl	0.110121	0.153616	1	1	0.232257
Stk16	0.110146	0.150409	0.801	0.773	0.232257
Nup98	0.110206	0.140469	0.528	0.482	0.232257
Cdc42ep3	0.110458	-0.119515	0.211	0.277	0.232592
Ppie	0.110515	0.146425	0.882	0.794	0.232592
Sema3f	0.110821	0.136629	0.54	0.447	0.232937
Smarca5	0.110829	0.150313	1	0.986	0.232937
Bbx	0.110906	0.182641	0.894	0.908	0.23294
Wdr75	0.111332	0.154115	0.559	0.525	0.233676
Psenen	0.111622	0.153436	0.913	0.95	0.234061
Prmt2	0.111666	0.136688	0.491	0.383	0.234061
Arhgap29	0.111792	-0.166711	0.155	0.241	0.234167
Vdac3	0.11198	0.142433	0.975	1	0.234251
Fam117a	0.111984	0.164254	0.311	0.142	0.234251
Dnal4	0.112124	0.141162	0.565	0.525	0.234386
Pfdn4	0.112295	0.143521	0.876	0.809	0.234586
Lgals1	0.112411	0.159706	0.77	0.631	0.234603
Hpcal1	0.112455	0.135103	0.516	0.404	0.234603
Efhd2	0.112669	0.141578	0.379	0.262	0.234891
Srbd1	0.112787	0.143738	0.627	0.532	0.234978
Rem1	0.11288	0.151868	0.832	0.709	0.235014
Znhit2	0.113199	0.135365	0.528	0.418	0.235423
Kif2a	0.113265	0.152757	0.832	0.787	0.235423
Ppcs	0.11335	0.13376	0.41	0.277	0.235423
Zfp410	0.113535	0.127366	0.571	0.447	0.235423
Hist1h4c	0.113582	0.155038	0.342	0.206	0.235423
Tada3	0.11359	0.135391	0.609	0.532	0.235423
Hmgb3	0.113608	0.17089	0.994	0.993	0.235423
Eif3c	0.113929	0.143585	0.988	0.993	0.235931
Crlf3	0.114028	0.136309	0.652	0.553	0.235979
Zfp846	0.114114	0.134418	0.429	0.319	0.235999
Elp3	0.114394	0.139112	0.683	0.574	0.23642
Srpk1	0.114543	0.140726	0.932	0.894	0.236569
Pdcd6	0.114639	0.150268	0.95	0.936	0.236572
Bcl2	0.114697	0.155576	0.801	0.716	0.236572
Dctn3	0.114788	0.15171	0.938	0.922	0.236602
Fam107a	0.115124	0.203252	0.484	0.404	0.237137
Rwdd4a	0.115304	0.134916	0.571	0.489	0.237201
Mphosph8	0.115308	0.151642	0.932	0.887	0.237201
Coq6	0.115415	0.134234	0.615	0.546	0.237262
Taz	0.11579	0.13241	0.615	0.504	0.237877
Ergic3	0.116166	0.149143	0.894	0.908	0.238491
Yipf5	0.116632	0.150482	0.758	0.681	0.239289
Pgrmc2	0.116833	0.140722	0.689	0.589	0.239542
Atxn2	0.11699	0.152741	0.727	0.624	0.239622
Got2	0.117223	0.14894	0.969	0.943	0.239622
Ufsp2	0.117272	0.143263	0.634	0.674	0.239622
Sertad3	0.117317	0.147657	0.429	0.298	0.239622
Mrps25	0.117329	0.148084	0.882	0.816	0.239622
Nol6	0.117336	0.14325	0.404	0.248	0.239622
Sh3bp4	0.117437	-0.103516	0.23	0.284	0.239671
Spcs2	0.117568	0.141637	0.994	1	0.23978
Thop1	0.117752	0.144781	0.894	0.823	0.239802
Tfrc	0.117828	0.147194	0.36	0.291	0.239802
Cib1	0.118041	0.1304	0.491	0.433	0.239802
Tomm70a	0.118079	0.147657	0.758	0.667	0.239802
Fam110a	0.118099	0.146826	0.404	0.355	0.239802
Phf23	0.118137	0.144243	0.789	0.695	0.239802
Ankrd49	0.118137	0.144987	0.745	0.589	0.239802
Ttyh3	0.118336	0.140396	0.64	0.504	0.239802
Ap3s2	0.118357	0.141485	0.602	0.518	0.239802
Ss18	0.118366	0.143307	0.826	0.702	0.239802
Sh3gl3	0.11843	0.132048	0.435	0.319	0.239802
Pbrm1	0.119151	0.137019	0.963	0.95	0.241015
Srpr	0.119256	0.149877	0.764	0.738	0.241015
Tmpo	0.119283	0.149467	1	0.979	0.241015
H2afz	0.119372	0.141632	1	1	0.241015
Ctdp1	0.119418	0.165462	0.317	0.149	0.241015
Ammecr1	0.119636	0.12972	0.466	0.369	0.241298
Gdnf	0.119729	0.15088	0.503	0.376	0.241327
Csnk1g3	0.119835	0.145905	0.72	0.688	0.241384
Dgcr14	0.120105	0.136484	0.416	0.369	0.24177
Dbr1	0.120437	0.12972	0.391	0.305	0.242281
Zfp768	0.12099	0.127639	0.509	0.39	0.243006
Ndufb9	0.121018	0.136094	0.994	1	0.243006
Saraf	0.121032	0.142496	0.783	0.73	0.243006
Myl12a	0.121167	0.163414	0.963	0.957	0.243118
Med29	0.121516	0.145895	0.901	0.894	0.243661
Dhx8	0.121816	0.13562	0.522	0.454	0.244106
Meox1	0.122035	-0.110596	0.435	0.454	0.244322
Ncs1	0.122258	0.130065	0.497	0.404	0.244322
Pym1	0.122315	0.124985	0.509	0.44	0.244322
Ncaph	0.122357	0.137019	0.764	0.624	0.244322
Mrps36	0.122417	0.147993	0.882	0.801	0.244322
Mrpl55	0.12243	0.145481	0.783	0.787	0.244322
Nkd1	0.122579	0.146069	0.497	0.426	0.244322
Mettl14	0.122597	0.13169	0.391	0.319	0.244322
Vps37b	0.122634	0.140061	0.348	0.277	0.244322
Uba5	0.122819	0.139453	0.696	0.617	0.24443
Pxdn	0.122846	0.131045	0.522	0.461	0.24443
Mrps26	0.123006	0.143287	0.95	0.865	0.244592
5430416N02Rik	0.123449	0.133196	0.547	0.482	0.245314
Nras	0.124001	0.141674	0.783	0.688	0.246233
Paxbp1	0.12407	0.1447	0.727	0.681	0.246233
Polr1a	0.124555	0.134982	0.683	0.553	0.246943
AU020206	0.12462	0.140853	0.429	0.39	0.246943
Umps	0.124667	0.13718	0.739	0.645	0.246943
Rwdd1	0.124868	0.151299	0.963	0.957	0.247182
Bpgm	0.125051	0.127313	0.41	0.277	0.247307
Zcchc2	0.12509	0.149588	0.348	0.248	0.247307
Ccar2	0.12542	0.134559	0.484	0.426	0.247481
Heatr3	0.125479	0.129033	0.503	0.426	0.247481
Coprs	0.125595	0.135072	0.472	0.369	0.247481
AU019823	0.125623	0.13695	0.621	0.546	0.247481
Sdhc	0.125638	0.148995	0.888	0.872	0.247481
Rpa1	0.12567	0.125728	0.602	0.461	0.247481
Zdhhc5	0.125737	0.162407	0.311	0.177	0.247481
Hoxb6	0.126018	0.13897	0.665	0.567	0.247876
Ubn1	0.126732	0.144466	0.919	0.894	0.248996
Hmcn1	0.12679	0.145236	0.82	0.787	0.248996
Fam109a	0.126829	0.132887	0.429	0.305	0.248996
Dctn2	0.127335	0.1422	0.95	0.887	0.249686
Impa1	0.127341	0.132814	0.658	0.553	0.249686
Gyg	0.127808	0.128165	0.41	0.348	0.249709
Podxl2	0.127829	0.137442	0.609	0.482	0.249709
Zfp706	0.127884	0.140374	0.975	0.972	0.249709
Rbx1	0.12798	0.133909	0.994	1	0.249709
Isca1	0.128054	0.132637	0.54	0.454	0.249709
Eif4g3	0.12822	0.137416	0.851	0.787	0.249709
Gpsm1	0.12824	-0.102792	0.224	0.312	0.249709
L3mbtl2	0.128411	0.159414	0.304	0.184	0.249709
2700097O09Rik	0.128429	0.133228	0.416	0.319	0.249709
Nipa2	0.128454	0.137155	0.627	0.574	0.249709
Tyms	0.128489	0.141966	0.95	0.858	0.249709
Msh6	0.12859	0.17235	0.559	0.546	0.249709
2610318N02Rik	0.128713	0.131634	0.64	0.532	0.249709
Nup43	0.12882	0.141908	0.783	0.78	0.249709
Eny2	0.128842	0.138805	0.981	0.986	0.249709
Cd2bp2	0.128902	0.135402	0.646	0.603	0.249709
Mpzl1	0.12898	0.154539	0.907	0.879	0.249709
Eif4e2	0.129015	0.138016	0.963	0.965	0.249709
Hint2	0.129027	0.150309	0.888	0.879	0.249709
2022-03-02	0.129151	0.130099	0.41	0.355	0.249709
Ubald2	0.129193	0.156426	0.888	0.851	0.249709
Mef2c	0.129206	-0.164061	0.13	0.248	0.249709
Tubb4b	0.129264	0.185682	0.988	1	0.249709
Pdss2	0.129288	0.137111	0.398	0.319	0.249709
Igfbp4	0.129417	0.19821	0.913	0.865	0.249802
Rest	0.129637	0.183669	0.932	0.908	0.250072
Gpr27	0.130207	-0.101714	0.193	0.298	0.251015
Ifrd1	0.130514	0.136084	0.584	0.489	0.251166
Otulin	0.13052	0.13376	0.733	0.603	0.251166
Kpna1	0.130529	0.13117	0.447	0.34	0.251166
Akap9	0.130706	0.172914	0.913	0.908	0.251347
Ska1	0.130785	0.146527	0.652	0.61	0.251347
Eif1a	0.130929	0.149078	0.925	0.887	0.251407
Mrgbp	0.131045	0.134916	0.584	0.525	0.251407
Cnep1r1	0.131139	0.13085	0.64	0.553	0.251407
Lyst	0.131141	0.141578	0.354	0.248	0.251407
Bnip2	0.131292	0.142677	0.87	0.773	0.251422
Col3a1	0.131341	0.156184	0.41	0.284	0.251422
Pak4	0.131516	0.129461	0.658	0.553	0.251422
Trp53bp2	0.131537	0.12972	0.565	0.454	0.251422
Atp13a3	0.131554	0.14551	0.64	0.553	0.251422
Dpm3	0.131669	0.140078	0.963	0.943	0.251444
Cdc26	0.13176	0.143854	0.932	0.908	0.251444
Pycrl	0.131809	0.140969	0.764	0.674	0.251444
Derl1	0.132007	0.134064	0.652	0.603	0.251666
Mtmr14	0.13231	0.132048	0.509	0.44	0.251749
Ppp1r7	0.132319	0.143129	0.752	0.73	0.251749
Katna1	0.13238	0.125838	0.652	0.539	0.251749
Dazap1	0.132428	0.138898	0.932	0.936	0.251749
Fam120a	0.132457	0.146487	0.733	0.66	0.251749
Ipo7	0.132602	0.151663	0.77	0.752	0.251845
Pygb	0.132674	0.134493	0.435	0.326	0.251845
Naa16	0.132934	0.124798	0.497	0.525	0.251845
Rnf26	0.132951	0.144498	0.714	0.667	0.251845
Hsbp1	0.132988	0.146107	0.975	0.929	0.251845
Kifap3	0.132995	0.142623	0.814	0.716	0.251845
Lsm8	0.13341	0.133956	0.957	0.929	0.25243
Mccc1	0.133467	0.128082	0.391	0.262	0.25243
Gpx4	0.133548	0.13397	0.988	1	0.25243
Acsf2	0.133835	0.139812	0.335	0.227	0.252818
Dnttip1	0.133981	0.136726	0.839	0.752	0.252939
Bcdin3d	0.134228	0.127432	0.447	0.333	0.25312
Kbtbd4	0.13424	0.132887	0.391	0.319	0.25312
Map1a	0.134334	0.171468	0.267	0.149	0.253142
Atp5l	0.134627	0.133499	1	0.993	0.253542
Camsap2	0.134764	0.136484	0.416	0.298	0.253645
Ncln	0.1352	0.133728	0.59	0.489	0.254311
Aph1a	0.1355	0.145347	0.77	0.73	0.25472
Clta	0.135699	0.131599	0.994	1	0.254939
Blm	0.135873	0.13562	0.634	0.56	0.255111
Gpatch1	0.135971	0.12972	0.398	0.348	0.255141
Ptp4a2	0.136136	0.151535	0.981	0.929	0.255296
Irf3	0.136366	0.12416	0.497	0.426	0.255543
Gga1	0.136506	0.129089	0.578	0.504	0.255543
Plcg1	0.136515	0.12754	0.466	0.369	0.255543
Helz	0.136722	0.151807	0.652	0.66	0.255689
Nsmce4a	0.136758	0.132648	0.981	0.972	0.255689
Sf3a1	0.137066	0.143421	0.801	0.738	0.256046
Cars	0.13719	0.135378	0.528	0.532	0.256046
Prkaca	0.137201	0.125368	0.609	0.518	0.256046
Tob2	0.137282	0.129408	0.559	0.525	0.256046
Idi1	0.137372	0.174629	0.596	0.496	0.256046
Adamts12	0.137445	-0.112644	0.193	0.262	0.256046
4933404O12Rik	0.137877	0.220714	0.267	0.064	0.256691
Fkbp3	0.137957	0.127326	0.988	0.986	0.256691
Ptpn11	0.138085	0.143814	0.739	0.702	0.256774
Pogz	0.139424	0.121344	0.571	0.411	0.259095
Aldh6a1	0.1395	-0.101873	0.186	0.277	0.259095
Kansl2	0.140063	0.137567	0.745	0.667	0.259411
Rab34	0.140107	0.136654	0.795	0.759	0.259411
Fbxl20	0.140183	0.153632	0.335	0.213	0.259411
Copb2	0.140211	0.140973	0.957	0.908	0.259411
Mbd4	0.140309	0.123127	0.422	0.312	0.259411
Anapc15	0.140325	0.136888	0.646	0.539	0.259411
Cops8	0.140369	0.140875	0.913	0.894	0.259411
Pip5k1c	0.1405	0.125866	0.429	0.305	0.259411
Gas2l1	0.140586	0.149307	0.304	0.22	0.259411
Trim2	0.140589	0.137646	0.466	0.397	0.259411
Stx8	0.140591	0.130036	0.602	0.461	0.259411
Adprm	0.14126	0.139014	0.329	0.184	0.260153
Cdk2ap2	0.141267	0.163464	0.72	0.652	0.260153
Cep170	0.14128	0.136528	0.602	0.539	0.260153
Hnrnpa2b1	0.141329	0.168212	1	1	0.260153
Pla2g12a	0.141653	0.139037	0.807	0.738	0.260595
Kdm5c	0.141768	0.127464	0.547	0.461	0.260652
Hsph1	0.1419	0.148393	0.714	0.582	0.260738
Men1	0.142046	0.126993	0.522	0.454	0.260738
Rpn1	0.142068	0.158876	0.87	0.879	0.260738
Spire1	0.142498	0.137646	0.379	0.348	0.260973
Thyn1	0.142551	0.143534	0.87	0.837	0.260973
Mrps18c	0.142605	0.139289	0.839	0.759	0.260973
Chaf1b	0.142608	0.176512	0.596	0.589	0.260973
Mpv17l2	0.142617	0.126304	0.435	0.34	0.260973
Gps1	0.143173	0.148728	0.882	0.865	0.261837
Asah1	0.143348	0.135378	0.547	0.496	0.262002
Ctxn3	0.143695	0.19813	0.255	0.213	0.262481
Cd24a	0.144057	0.188263	1	0.993	0.262988
Samd14	0.144228	0.123785	0.398	0.298	0.263143
Atxn10	0.144585	0.136583	0.963	0.972	0.263406
Pclaf	0.14459	0.142624	0.981	0.993	0.263406
Fhl1	0.144627	-0.14334	0.124	0.27	0.263406
Dcps	0.145039	0.133652	0.857	0.794	0.264001
Sipa1l1	0.145541	0.155576	0.851	0.794	0.26476
Mapk14	0.145777	0.12972	0.429	0.383	0.265033
Upf2	0.146247	0.150038	0.801	0.78	0.265532
Clpx	0.146291	0.124296	0.646	0.518	0.265532
E2f8	0.146388	0.118183	0.516	0.383	0.265532
Zfp131	0.146506	0.128926	0.72	0.61	0.265532
Rcc1l	0.146513	0.131594	0.41	0.362	0.265532
Esd	0.146565	0.134696	0.981	0.965	0.265532
Nfat5	0.146883	0.139122	0.615	0.567	0.265951
Mat2b	0.147215	0.138473	0.77	0.723	0.266398
Morc2a	0.147571	0.127639	0.348	0.291	0.266886
Aldh7a1	0.147697	0.135961	0.795	0.695	0.266922
Sesn3	0.147763	0.164523	0.708	0.674	0.266922
Ppp2cb	0.148107	0.114072	0.503	0.39	0.267276
Gripap1	0.148132	0.13117	0.658	0.574	0.267276
Tamm41	0.148488	0.118167	0.516	0.411	0.267763
Rangrf	0.148685	0.12972	0.696	0.603	0.267962
Dynlt1a	0.148931	0.116008	0.491	0.383	0.267974
Chd4	0.149044	0.175873	0.994	0.979	0.267974
Zfp213	0.149114	0.12593	0.379	0.262	0.267974
Ndufb5	0.149149	0.13587	0.988	1	0.267974
Xpo4	0.149163	0.129114	0.578	0.525	0.267974
Ube2g2	0.149211	0.121299	0.466	0.355	0.267974
Ttc1	0.149505	0.138127	0.758	0.723	0.268129
Cops4	0.149515	0.135814	0.975	0.929	0.268129
Wdr26	0.149652	0.145692	0.87	0.83	0.268129
Ndfip1	0.149658	0.119769	0.441	0.348	0.268129
Strada	0.149775	0.13269	0.36	0.241	0.268129
Hoxa7	0.150116	0.146069	0.714	0.638	0.268129
Snapc3	0.15013	0.124266	0.429	0.298	0.268129
Naga	0.150149	-0.132644	0.168	0.255	0.268129
Prmt5	0.150291	0.142677	0.845	0.752	0.268129
Hist1h1e	0.150304	-0.111677	0.882	0.922	0.268129
Dnajc12	0.150378	-0.102185	0.18	0.255	0.268129
Calml4	0.150433	-0.184202	0.137	0.234	0.268129
Rbm8a	0.150477	0.133611	0.975	0.986	0.268129
Eps15l1	0.150587	0.128625	0.416	0.376	0.268129
Gar1	0.150596	0.135278	0.963	0.929	0.268129
Ift74	0.150969	0.143845	0.938	0.887	0.268534
Pcm1	0.150996	0.148546	0.95	0.972	0.268534
Med30	0.151242	0.139153	0.733	0.688	0.268816
Ddx10	0.151374	0.151049	0.652	0.645	0.268898
Adi1	0.151483	0.117066	0.509	0.348	0.268937
Dtymk	0.151704	0.134909	0.944	0.957	0.268968
Aven	0.151758	0.124454	0.571	0.518	0.268968
Rbm22	0.151761	0.14802	0.845	0.837	0.268968
Rgl2	0.151994	0.143203	0.304	0.177	0.269188
Rrp9	0.152059	0.131568	0.665	0.596	0.269188
Brd7	0.152642	0.145224	0.863	0.858	0.269694
Sacm1l	0.152702	0.129348	0.404	0.326	0.269694
Exoc1	0.152775	0.12754	0.46	0.34	0.269694
Ctsb	0.152848	0.134503	0.814	0.716	0.269694
Timp3	0.152855	-0.107327	0.267	0.255	0.269694
Ap1m1	0.152926	0.131811	0.714	0.61	0.269694
Wipf2	0.152954	0.12972	0.398	0.298	0.269694
Uqcc2	0.153384	0.140096	0.894	0.879	0.270084
Zc3hc1	0.153406	0.133573	0.627	0.475	0.270084
Tbpl1	0.153437	0.12727	0.677	0.567	0.270084
Cldn5	0.153994	-0.220036	0.199	0.17	0.270911
Guk1	0.154145	0.143609	0.888	0.844	0.271023
Stx6	0.15439	0.127215	0.578	0.504	0.271292
Grk2	0.154567	0.119666	0.491	0.44	0.271292
Timm50	0.15463	0.139022	0.888	0.83	0.271292
Eef1akmt4	0.154649	0.133415	0.342	0.284	0.271292
Trmt10c	0.154831	0.127084	0.658	0.546	0.271388
Rrp36	0.154878	0.120144	0.522	0.468	0.271388
Atp5c1	0.155032	0.120679	1	1	0.271504
Alg14	0.155686	0.123289	0.379	0.305	0.27237
Mlf2	0.155703	0.133017	1	0.965	0.27237
Tpst1	0.155945	0.113652	0.503	0.376	0.272639
Epb41l4a	0.156102	0.119228	0.41	0.312	0.272705
Ppp1r15a	0.156158	0.161054	0.596	0.553	0.272705
Frem1	0.156554	0.137646	0.335	0.177	0.27281
Armc10	0.156601	0.13061	0.596	0.525	0.27281
Eif4ebp1	0.156684	0.142214	0.932	0.922	0.27281
Pcyox1	0.156766	0.127432	0.41	0.34	0.27281
Fam98a	0.156876	0.122777	0.398	0.262	0.27281
Kdm4a	0.156877	0.13321	0.509	0.418	0.27281
Pax2	0.156908	0.186301	0.963	0.965	0.27281
Gm17018	0.157107	0.140524	0.733	0.716	0.27281
Cops7a	0.157243	0.131797	0.783	0.674	0.27281
Myef2	0.157326	0.156027	0.876	0.816	0.27281
1110008P14Rik	0.157435	0.1537	0.329	0.241	0.27281
Mapk1ip1l	0.157496	0.136376	0.733	0.652	0.27281
Ddx50	0.157512	0.132607	0.957	0.908	0.27281
Vps26a	0.157521	0.120992	0.559	0.468	0.27281
Mob2	0.157561	0.125185	0.59	0.539	0.27281
Fbxw5	0.157627	0.119209	0.466	0.348	0.27281
Flna	0.157892	0.142459	0.82	0.716	0.273115
Ephb2	0.158179	0.137111	0.373	0.305	0.273459
Hist1h2ac	0.158701	0.147524	0.286	0.156	0.274138
Nr2f2	0.158749	0.161478	0.994	1	0.274138
Ttc27	0.158864	0.12972	0.391	0.305	0.274184
Sox12	0.159018	0.146993	0.876	0.858	0.274298
Inpp5f	0.159415	0.129062	0.503	0.433	0.27474
Tmem101	0.159452	0.122702	0.627	0.56	0.27474
Ism1	0.159617	0.143802	0.28	0.206	0.274872
Tbc1d19	0.159888	0.121136	0.342	0.241	0.275185
Ifngr2	0.160243	0.127432	0.404	0.348	0.275643
Napsa	0.160674	-0.160347	0.099	0.234	0.27623
Stim2	0.160914	0.137505	0.379	0.255	0.276491
Crk	0.161149	0.128651	0.64	0.525	0.27659
Atrx	0.16115	0.171284	1	0.986	0.27659
Ccnk	0.16129	0.128762	0.522	0.461	0.276675
Slc25a19	0.162403	0.140649	0.435	0.355	0.278428
Knop1	0.162494	0.149568	0.975	0.95	0.278428
Cisd2	0.162581	0.140761	0.776	0.794	0.278428
Rsph9	0.162937	-0.106936	0.18	0.277	0.278561
Nop2	0.163033	0.12972	0.522	0.44	0.278561
Maged1	0.163082	0.151775	0.969	0.979	0.278561
Gen1	0.163266	0.120804	0.429	0.355	0.278561
Fam114a2	0.163296	0.136138	0.888	0.823	0.278561
Flot1	0.163388	0.124928	0.348	0.213	0.278561
Zc3h14	0.163445	0.137166	0.925	0.872	0.278561
Pdk3	0.163487	0.123574	0.497	0.39	0.278561
Fxyd6	0.163554	0.135789	0.994	0.957	0.278561
Polr2h	0.163558	0.12891	0.919	0.823	0.278561
Abca2	0.163686	0.130594	0.317	0.227	0.27862
Ncoa5	0.163773	0.11867	0.503	0.426	0.27862
Dnajc21	0.163986	0.138798	0.795	0.723	0.278831
Idh1	0.164155	0.140853	0.422	0.355	0.278965
Vdac1	0.164372	0.131546	0.994	1	0.27918
Exosc1	0.164849	0.139112	0.602	0.589	0.279786
Clk4	0.164909	0.126767	0.646	0.574	0.279786
Cenpn	0.165137	0.128868	0.64	0.596	0.280019
Spg7	0.165959	0.132129	0.64	0.645	0.281258
Gemin7	0.166224	0.135937	0.814	0.759	0.281527
Psmd11	0.166299	0.134516	0.963	0.929	0.281527
Rnd3	0.16664	0.131781	0.602	0.518	0.28195
Rps19bp1	0.166763	0.138599	0.845	0.787	0.282005
Kdm4b	0.167109	0.134234	0.323	0.17	0.282309
Slc35b1	0.167126	0.122352	0.54	0.461	0.282309
Rptor	0.167472	0.1175	0.379	0.284	0.28274
Pias3	0.168425	0.126406	0.342	0.255	0.28391
Prpf31	0.168446	0.13798	0.907	0.901	0.28391
Mfap4	0.168456	0.167545	0.851	0.73	0.28391
2210016F16Rik	0.168531	0.126757	0.658	0.518	0.28391
Mast2	0.168959	0.111865	0.466	0.355	0.284476
Inip	0.169398	0.126217	0.509	0.362	0.28506
Tmed9	0.169721	0.133531	0.988	0.986	0.285253
Cct2	0.169762	0.120221	0.994	1	0.285253
Hbs1l	0.169837	0.126679	0.689	0.638	0.285253
Baz2a	0.169883	0.138746	0.584	0.511	0.285253
Brd4	0.170075	0.136197	0.913	0.837	0.285253
Tulp3	0.170077	0.120609	0.497	0.39	0.285253
Rab4a	0.170225	0.128444	0.317	0.262	0.285253
Utp3	0.170249	0.137151	0.938	0.95	0.285253
Fth1	0.170474	0.121971	1	1	0.285474
Cntfr	0.170763	0.148196	0.72	0.631	0.285804
Specc1	0.170952	0.140396	0.292	0.199	0.285966
Lmnb2	0.17117	0.124075	0.602	0.482	0.286033
Tex9	0.171209	0.126079	0.584	0.532	0.286033
Tmtc4	0.171431	0.156482	0.298	0.177	0.286033
Alkbh1	0.171514	0.148546	0.851	0.773	0.286033
Fam118b	0.171537	0.147524	0.304	0.17	0.286033
Skp2	0.171546	0.132637	0.739	0.66	0.286033
Sf1	0.171697	0.136977	0.839	0.809	0.286123
Cad	0.171831	0.138417	0.584	0.553	0.286123
Srp54a	0.171877	0.121998	0.416	0.333	0.286123
Krcc1	0.172238	0.138671	0.807	0.738	0.28657
Sumo2	0.172371	0.116892	1	1	0.286637
Eif2a	0.172718	0.137587	0.839	0.858	0.286863
Zcchc3	0.172738	0.133684	0.807	0.766	0.286863
4930430F08Rik	0.172868	0.12048	0.391	0.248	0.286863
Dnajb11	0.172877	0.134861	0.832	0.801	0.286863
Strip1	0.173067	0.139555	0.329	0.227	0.287025
Mfsd4a	0.173245	0.13562	0.311	0.17	0.287145
Ywhag	0.173438	0.138371	0.77	0.745	0.287145
Grina	0.173451	0.138508	0.671	0.574	0.287145
Cdadc1	0.173511	0.119159	0.534	0.418	0.287145
Ndufs6	0.173643	0.133141	0.963	0.965	0.287212
Dhodh	0.173797	0.119175	0.516	0.397	0.287313
Arfgap1	0.173964	0.120804	0.46	0.362	0.287435
Cdkn2d	0.174592	0.127707	0.683	0.61	0.288244
Huwe1	0.174682	0.149359	0.957	0.901	0.288244
Zfp740	0.174733	0.12942	0.578	0.518	0.288244
Stk40	0.174964	0.128511	0.385	0.27	0.288472
St7l	0.175303	0.11701	0.41	0.326	0.288585
Rpap1	0.175351	0.130099	0.36	0.362	0.288585
Gtpbp4	0.175488	0.151204	0.913	0.894	0.288585
Med22	0.175499	0.107824	0.447	0.355	0.288585
Tbc1d7	0.175499	0.116761	0.547	0.489	0.288585
Zfp703	0.175694	0.127313	0.354	0.284	0.288753
Nup54	0.17597	0.125693	0.627	0.532	0.289053
Mex3a	0.176562	0.147553	0.913	0.823	0.289872
Ttc13	0.176727	0.11758	0.441	0.383	0.289986
Pmp22	0.176818	-0.18756	0.193	0.213	0.289986
2022-09-11	0.177204	0.152126	0.863	0.865	0.29011
Flot2	0.177287	0.127181	0.335	0.234	0.29011
Thap7	0.17729	0.124266	0.391	0.284	0.29011
Rnf114	0.177508	0.113073	0.491	0.411	0.29011
Ska3	0.177611	0.12178	0.441	0.383	0.29011
Gse1	0.177635	0.120804	0.447	0.355	0.29011
Abhd8	0.177665	0.122436	0.615	0.56	0.29011
Lamp1	0.177716	0.133006	0.938	0.929	0.29011
Ggps1	0.177739	0.129395	0.491	0.397	0.29011
Xpc	0.177831	0.127887	0.547	0.482	0.29011
Mtx1	0.178824	0.134333	0.795	0.709	0.291447
Rbbp4	0.178857	0.134573	0.981	0.972	0.291447
Dph6	0.178932	0.13241	0.571	0.475	0.291447
Zfp950	0.179133	0.13796	0.534	0.475	0.291533
Plk2	0.179173	0.159952	0.354	0.298	0.291533
Tbc1d20	0.179392	0.114831	0.435	0.348	0.291656
Epn1	0.17951	0.129245	0.764	0.631	0.291656
Dgkz	0.179576	0.121701	0.36	0.262	0.291656
Armc1	0.179626	0.137861	0.826	0.709	0.291656
Psmd12	0.179738	0.135186	0.969	0.972	0.291687
Prr14	0.179848	0.131797	0.354	0.234	0.291712
Thoc3	0.179998	0.133059	0.938	0.872	0.291801
Plpp1	0.180472	0.150718	0.298	0.191	0.292417
Fam111a	0.180703	0.138746	0.503	0.447	0.292497
Nsdhl	0.18071	0.122976	0.416	0.277	0.292497
Psmc3	0.180832	0.137343	0.988	0.979	0.292542
Mtmr3	0.180959	0.114054	0.366	0.291	0.292595
Lca5	0.181115	0.131409	0.354	0.227	0.292693
Smg9	0.181238	0.123289	0.366	0.298	0.29274
Ehd1	0.181597	0.13343	0.59	0.56	0.293008
Timm13	0.181675	0.138646	0.988	0.993	0.293008
Mark2	0.181688	0.143829	0.702	0.645	0.293008
Cpm	0.182062	0.16254	0.261	0.149	0.293459
Adam15	0.182539	0.191007	0.255	0.106	0.294071
Ttll12	0.182632	0.12263	0.398	0.305	0.294071
Ssr1	0.182966	0.132591	0.876	0.858	0.294357
Hnrnpf	0.18308	0.123434	1	1	0.294357
Ahcy	0.183105	0.1111	0.478	0.411	0.294357
Pimreg	0.18319	0.184909	0.658	0.603	0.294357
Arpc4	0.183371	0.128687	0.733	0.624	0.294497
Fbxo6	0.183599	0.132887	0.398	0.277	0.29471
Crkl	0.183815	0.116008	0.441	0.326	0.294903
Gstm1	0.184196	0.13562	0.627	0.589	0.295347
Zkscan3	0.184282	0.129492	0.739	0.695	0.295347
Acp1	0.18533	0.132869	0.981	0.972	0.296873
Prep	0.185535	0.116638	0.472	0.383	0.297047
Zyx	0.186002	0.135037	0.658	0.589	0.297442
Rpf2	0.186029	0.12972	0.739	0.652	0.297442
Usp4	0.186122	0.131105	0.447	0.418	0.297442
Srp19	0.186401	0.140802	0.938	0.936	0.297442
Frmd8	0.18641	0.134333	0.323	0.262	0.297442
mt-Nd4l	0.186504	0.120943	1	1	0.297442
Zc3h15	0.18657	0.131793	0.988	1	0.297442
Psmb2	0.186587	0.130691	0.988	0.993	0.297442
Esco1	0.186733	0.113393	0.348	0.284	0.297442
Pdia4	0.18686	0.142568	0.882	0.872	0.297442
Slc45a3	0.186916	0.14638	0.317	0.177	0.297442
Pcnx	0.186933	0.119191	0.453	0.383	0.297442
Nadk2	0.187109	0.110702	0.41	0.312	0.297569
Hist1h4i	0.187264	0.142714	0.72	0.624	0.297662
Heatr6	0.187396	0.118236	0.627	0.511	0.297719
Hadhb	0.187737	0.130803	0.776	0.773	0.298104
Rraga	0.187831	0.136245	0.776	0.787	0.298104
Avl9	0.188757	0.122352	0.522	0.468	0.299421
1810013L24Rik	0.188955	0.133624	0.317	0.227	0.29954
Cdc37	0.189046	0.12416	0.994	1	0.29954
Actn3	0.189122	-0.116813	0.168	0.22	0.29954
Cpxm1	0.189968	0.163966	0.795	0.823	0.300726
Dcaf7	0.190177	0.124005	0.609	0.553	0.300903
Cfap20	0.190304	0.135235	0.901	0.809	0.300922
Gtf2h5	0.190659	0.131437	0.95	0.943	0.300922
Snx2	0.190699	0.140155	0.807	0.837	0.300922
Prrc2a	0.190743	0.139289	0.888	0.915	0.300922
Taok1	0.19078	0.13823	0.702	0.73	0.300922
Sptan1	0.190853	0.165231	0.72	0.709	0.300922
Ripk3	0.190933	0.123651	0.342	0.227	0.300922
H2-Eb1	0.190966	0.149588	0.273	0.213	0.300922
Kank2	0.191207	0.12263	0.385	0.326	0.301104
Pepd	0.191293	0.138276	0.764	0.766	0.301104
Hist1h3a	0.191521	0.122934	0.348	0.191	0.301104
Actr1a	0.191524	0.121933	0.54	0.475	0.301104
Tmtc3	0.191567	0.156482	0.267	0.199	0.301104
Dera	0.191688	0.12627	0.758	0.688	0.30114
Irgq	0.191955	0.141578	0.335	0.255	0.301408
Gng2	0.192084	0.136245	0.609	0.574	0.301456
Cmas	0.192203	0.128219	0.789	0.709	0.301491
Scap	0.192511	0.123975	0.335	0.284	0.301781
Trmt1l	0.192667	0.119191	0.441	0.418	0.301781
Txnrd1	0.19268	0.13562	0.739	0.745	0.301781
Tmem98	0.192963	0.120058	0.534	0.454	0.302071
Lamtor4	0.193574	0.129319	0.832	0.738	0.302637
Cog4	0.193586	0.11958	0.528	0.482	0.302637
Ubr5	0.193617	0.134709	0.708	0.674	0.302637
Polr3f	0.193934	0.108518	0.453	0.369	0.302978
Kif23	0.194252	0.166476	0.795	0.759	0.303322
Atg3	0.194414	0.117879	0.727	0.589	0.30334
Gosr2	0.194516	0.119897	0.36	0.234	0.30334
Chfr	0.194623	0.114546	0.385	0.305	0.30334
Cnih1	0.1947	0.132712	0.82	0.794	0.30334
Plcb3	0.1948	0.114054	0.379	0.277	0.30334
Stard3nl	0.194896	0.123404	0.665	0.582	0.30334
Zfc3h1	0.195034	0.11867	0.453	0.333	0.30334
Polr2j	0.195078	0.129913	0.975	0.993	0.30334
Rab3a	0.195144	0.121044	0.348	0.262	0.30334
Wdr83	0.195742	0.123926	0.596	0.532	0.304117
Tmem14c	0.196467	0.136169	0.907	0.865	0.304733
Elavl1	0.19649	0.13081	0.975	0.908	0.304733
Mark4	0.19654	0.128369	0.311	0.17	0.304733
Fbxo34	0.196588	0.128444	0.335	0.206	0.304733
Rab1b	0.196631	0.130491	0.689	0.652	0.304733
[truncated: 1,108 more rows]

## Sheet: Tub_progenitors3.MutVsCTRL.DEGs
Gene	p_val	avg_logFC	pct.1	pct.2	p_val_adj
Rpl29	3.55659e-97	-0.496576	1	1	9.76996e-94
Rps2	7.37765e-35	0.297578	1	1	1.01332e-31
Rpl21	9.43787e-34	-0.161817	1	1	8.64194e-31
Uba52	1.11894e-31	0.469523	0.985	1	7.68433e-29
Tpm3-rs7	4.12395e-27	0.786424	0.759	0.226	2.2657e-24
Eif3j1	2.29625e-26	0.773404	0.947	0.669	1.0513e-23
Gm10260	8.18222e-24	1.9156	0.496	0.008	3.21094e-21
Rps18	5.01318e-19	-0.192614	1	1	1.7214e-16
Rplp0	1.09524e-18	-0.13924	1	1	3.34292e-16
Pttg1	1.58459e-16	0.745791	0.744	0.534	4.35286e-14
Rps15a	1.75588e-16	-0.109071	1	1	4.3849e-14
Erh	3.26598e-16	0.355171	0.977	0.977	7.47637e-14
Eif5	1.14732e-15	0.429214	0.992	0.985	2.42437e-13
Smarca4	2.23006e-15	0.550123	0.94	0.684	4.3757e-13
Rpl5	7.80306e-14	-0.111408	1	1	1.429e-11
Rpl23a	1.21692e-13	-0.108401	1	1	2.0893e-11
Cox5b	4.21815e-13	0.302083	1	1	6.81603e-11
Srsf2	5.81581e-13	0.335437	1	0.992	8.87557e-11
Hspa8	6.85782e-13	0.313307	1	1	9.91496e-11
Gm10036	1.80395e-12	-0.444293	0.564	0.744	2.47773e-10
Tmsb10	2.04478e-12	0.271442	1	1	2.67476e-10
H2afy	2.97822e-12	0.265304	0.992	1	3.71871e-10
Ppia	5.41571e-12	0.169844	1	1	6.46824e-10
Gm10076	8.24885e-12	0.369791	0.977	0.97	9.4415e-10
Fau	1.34654e-11	-0.101974	1	1	1.47958e-09
Eif5a	4.14984e-11	0.253247	1	1	4.38446e-09
Rnf187	1.15412e-10	0.332886	1	0.985	1.17421e-08
Pgk1	1.53446e-10	-0.226985	0.985	1	1.50541e-08
Sec61g	2.52408e-10	0.2434	0.992	1	2.39091e-08
Pebp1	3.80408e-10	0.214491	0.992	1	3.48327e-08
Srsf3	5.61818e-10	0.289849	1	1	4.97843e-08
Snrpg	5.91553e-10	0.267687	0.992	0.992	5.07812e-08
Hsp90aa1	7.71789e-10	0.235607	1	1	6.42456e-08
Ubc	8.61123e-10	-0.327213	0.985	0.992	6.95737e-08
Atp5k	1.54416e-09	0.234426	1	1	1.21195e-07
D8Ertd738e	1.61463e-09	0.283722	1	0.977	1.23206e-07
Usp50	1.8424e-09	0.397631	0.82	0.617	1.35817e-07
Calm1	1.87879e-09	0.268236	1	0.992	1.35817e-07
H2afz	3.13785e-09	0.227863	1	1	2.21017e-07
Hmgn2	5.55663e-09	0.318648	1	1	3.81602e-07
Phlda3	8.12836e-09	-0.37359	0.654	0.835	5.446e-07
Eif1	9.78074e-09	0.209749	1	1	6.39707e-07
Arl3	1.14908e-08	0.333702	0.962	0.895	7.34078e-07
Sec61b	2.10841e-08	0.229653	1	1	1.31632e-06
Hmgn1	2.5804e-08	0.214611	1	1	1.57519e-06
Tpi1	3.70019e-08	-0.249433	1	1	2.20966e-06
Lrrc59	3.80194e-08	0.361013	0.985	0.917	2.22211e-06
Romo1	5.36676e-08	0.262025	1	0.985	3.06921e-06
Ptma	5.47475e-08	0.237629	1	1	3.06921e-06
Pdia6	8.86036e-08	0.292271	0.992	0.992	4.86788e-06
Rrs1	9.95234e-08	0.362618	0.767	0.647	5.28433e-06
Atp5a1	1.00031e-07	0.175109	1	1	5.28433e-06
Ldha	1.55826e-07	-0.253841	0.992	1	8.0765e-06
Nsa2	2.15259e-07	-0.168525	0.97	1	1.09503e-05
Dnaja1	4.14839e-07	0.264963	1	1	2.07193e-05
Ube2n	5.01526e-07	0.26783	0.985	0.97	2.46016e-05
Stmn1	5.55377e-07	0.191869	1	1	2.67653e-05
Fabp5	5.94416e-07	0.456805	0.962	0.962	2.81528e-05
Ppa1	6.9828e-07	0.283912	0.977	0.985	3.25115e-05
Ciapin1	7.39289e-07	0.336803	0.895	0.812	3.38471e-05
Cox6c	8.96498e-07	0.169744	1	1	4.03718e-05
Hist1h2ap	1.01009e-06	0.727807	0.992	0.917	4.47537e-05
Kdelr2	1.21733e-06	0.301753	0.955	0.88	5.30794e-05
Srsf6	1.48713e-06	0.262532	0.985	0.97	6.30298e-05
Vcp	1.50058e-06	0.227379	0.992	1	6.30298e-05
Raly	1.51437e-06	0.23866	0.985	0.992	6.30298e-05
Rps21	1.72238e-06	0.12301	1	1	7.06175e-05
Ywhaq	2.42911e-06	0.208985	1	1	9.81291e-05
Prdx1	3.23421e-06	0.199473	0.992	1	0.000128759
Aldoa	3.32209e-06	-0.2675	0.962	1	0.000130368
Atp5j2	3.75024e-06	0.179078	1	1	0.000145097
Hmga1	3.84406e-06	0.325605	0.797	0.617	0.000146661
Emid1	3.95602e-06	0.326025	0.97	0.932	0.000148865
Arf5	4.67004e-06	0.222661	1	0.977	0.00017336
Hspd1	5.1851e-06	0.25325	0.992	0.992	0.000189913
Cdk4	5.98479e-06	0.169789	0.992	1	0.000216319
Rpl35	6.20135e-06	0.124144	1	1	0.000221235
Hnrnpf	6.74266e-06	0.202205	1	1	0.000237463
Lsm6	7.53591e-06	0.247392	0.985	0.97	0.00026204
Eif3j2	7.97672e-06	-0.311384	0.534	0.684	0.000273901
Fkbp4	8.46517e-06	0.245812	0.985	1	0.000287084
Nudc	8.82681e-06	0.217588	1	0.992	0.000295698
Mrpl38	8.99316e-06	0.29031	0.85	0.759	0.000297641
Malat1	9.54328e-06	-0.281675	1	1	0.000312088
Wdr89	9.76894e-06	-0.254303	0.632	0.797	0.000315709
Igfbp2	9.94448e-06	0.391974	0.789	0.647	0.000317645
Oaz1	1.0168e-05	0.157142	1	1	0.00032105
Srsf7	1.07293e-05	0.245017	1	1	0.000334925
Manf	1.10599e-05	0.332922	0.977	0.985	0.000341365
mt-Nd1	1.21758e-05	0.205826	1	1	0.000371634
Alad	1.27152e-05	-0.239754	0.782	0.85	0.000383831
Txndc5	1.32301e-05	0.288231	0.925	0.85	0.000395035
Cycs	1.42998e-05	0.264624	0.992	0.962	0.000422381
Taldo1	1.48793e-05	0.228165	0.977	0.97	0.000434823
Cbr1	1.52101e-05	-0.290626	0.872	0.865	0.000439812
Fdps	1.60154e-05	0.371884	0.91	0.857	0.000458275
Cox5a	1.76558e-05	0.165888	1	1	0.000500006
Uqcrq	2.09303e-05	0.211919	0.985	0.992	0.000583283
Gstp1	2.10211e-05	0.322083	0.714	0.511	0.000583283
Irak1bp1	2.18881e-05	0.296732	0.586	0.444	0.000601266
Fth1	2.45712e-05	0.200671	1	1	0.000668288
Mrpl52	2.53151e-05	0.205936	0.992	0.985	0.00068177
Ccar1	2.56466e-05	0.243744	0.977	0.962	0.000683991
Mettl1	2.69184e-05	0.310155	0.887	0.82	0.000711009
Tmed2	3.01453e-05	0.236389	0.985	0.962	0.000788659
Serpinh1	3.09763e-05	0.247982	1	0.977	0.000802753
Fkrp	3.22763e-05	-0.253196	0.474	0.639	0.000828626
Maged1	3.42874e-05	0.232583	0.97	0.955	0.000872106
Ncbp1	3.48749e-05	0.298802	0.774	0.647	0.000878913
Arhgdia	3.64528e-05	0.25482	0.962	0.947	0.000908752
Srsf11	3.67206e-05	0.199038	0.992	0.985	0.000908752
Nenf	4.40598e-05	-0.174297	0.917	0.932	0.00108065
Uqcr11	4.48703e-05	0.181941	1	1	0.00108252
Mrpl19	4.5049e-05	0.27965	0.782	0.752	0.00108252
Hnrnpdl	4.53185e-05	0.262234	0.985	0.962	0.00108252
Arpc5l	4.7577e-05	0.256245	0.94	0.872	0.00112667
Marcksl1	4.86521e-05	0.180593	0.992	0.992	0.00114228
Strap	5.91712e-05	0.233509	0.962	0.97	0.00136747
Pepd	5.92389e-05	0.260653	0.925	0.789	0.00136747
Hist3h2ba	6.00707e-05	0.353345	0.887	0.677	0.00137512
Baz1a	6.41101e-05	0.291463	0.835	0.744	0.00145546
Crip2	6.51409e-05	0.297047	0.94	0.857	0.00146674
Calr	6.6976e-05	0.328522	0.992	0.985	0.0014958
Rrm2	6.92644e-05	0.398487	0.955	0.85	0.00153443
Ahsa1	7.06804e-05	0.240401	0.97	0.925	0.00155327
Fkbp1a	7.47964e-05	0.201005	0.985	0.985	0.00163068
Ctsl	7.66139e-05	-0.295731	0.992	0.985	0.0016466
Akirin1	7.67253e-05	0.304584	0.737	0.549	0.0016466
Rpp30	7.74618e-05	0.268065	0.767	0.662	0.00164952
Rex1bd	7.99089e-05	0.252343	0.91	0.865	0.00168854
Ube2f	8.90279e-05	0.275986	0.714	0.549	0.00186687
Psmb6	9.21242e-05	0.177239	1	0.992	0.00191716
Vegfa	0.000103501	-0.260884	0.692	0.729	0.00213772
Ube2m	0.000108394	0.199067	0.985	0.992	0.00222059
Tra2b	0.00010913	0.204266	0.985	0.977	0.00222059
Uchl3	0.000115007	0.230524	0.947	0.917	0.00232298
Pgam1	0.000118301	-0.104873	0.992	1	0.00237206
Ddah1	0.000119582	-0.306201	0.647	0.714	0.00238037
Nme4	0.000126677	-0.188816	0.887	0.872	0.00250347
Egln1	0.000130006	-0.187873	0.865	0.91	0.00254856
Serp1	0.000130814	0.251577	0.88	0.789	0.00254856
Slc2a1	0.000132542	-0.264913	0.383	0.534	0.00256403
Dbn1	0.000141052	0.298153	0.94	0.82	0.00270958
Srm	0.000143466	0.263417	0.91	0.857	0.0027368
Trappc6a	0.000147801	-0.21552	0.759	0.857	0.0027933
Rpl27	0.000148461	0.185041	1	0.992	0.0027933
Timm17a	0.000157063	0.234153	0.94	0.887	0.00293505
Dnaja2	0.000164192	0.231802	0.97	0.925	0.00304754
Tomm7	0.000170342	0.167985	0.985	0.992	0.00314046
2410004B18Rik	0.00017158	0.258001	0.752	0.579	0.00314219
Wdr83os	0.000173424	0.237251	0.925	0.902	0.00314588
Eif4e	0.000174071	0.242401	0.94	0.895	0.00314588
Sms	0.000190464	0.243461	0.947	0.985	0.00341964
Sf3b4	0.000194353	0.271718	0.902	0.835	0.0034668
S100a10	0.000201577	-0.247623	0.842	0.895	0.00356485
Gm7324	0.000202445	0.374693	0.398	0.075	0.00356485
Vdac3	0.000210172	0.193285	0.977	0.985	0.00367734
Lbr	0.000214901	0.28	0.759	0.692	0.00373628
Gpc3	0.000224345	-0.185275	0.947	0.977	0.00385862
Cnih1	0.000224746	0.24165	0.917	0.835	0.00385862
Ppm1g	0.000235726	0.223808	0.94	0.947	0.00402199
Tpm3	0.000240139	-0.176399	0.932	0.962	0.00407198
Isca2	0.000246521	0.247502	0.752	0.594	0.00415455
Rbm15b	0.000248427	0.255183	0.692	0.556	0.00416115
Gnas	0.000253258	0.152943	1	1	0.00421636
Msi2	0.000256069	-0.151844	0.962	0.962	0.00423748
Il11ra1	0.000267694	0.264479	0.571	0.414	0.00440333
Hspa4	0.000269463	0.259336	0.97	0.955	0.00440604
Aimp2	0.000271309	0.240777	0.88	0.707	0.00440998
Dcun1d5	0.00027521	0.212151	0.955	0.925	0.00442423
Vamp3	0.000275407	0.257559	0.812	0.729	0.00442423
Rbm25	0.000291315	0.179268	0.992	0.992	0.00465257
AY036118	0.000303635	-0.37919	0.94	0.955	0.00480712
Azin1	0.00030559	0.2455	0.692	0.466	0.00480712
Kpnb1	0.000306416	0.244453	0.97	0.887	0.00480712
Aifm1	0.000308276	0.260117	0.82	0.729	0.00480712
Mrpl18	0.000310125	0.189621	0.977	0.97	0.00480712
Ddx39b	0.000311491	0.15663	1	0.992	0.00480712
Dnajb11	0.000314976	0.253196	0.865	0.835	0.00482749
Nono	0.000316326	0.204014	1	0.985	0.00482749
Ssr3	0.00032629	0.229227	0.97	0.895	0.00495204
Tyms	0.000331584	0.284705	0.94	0.917	0.00500473
Ranbp1	0.000336634	0.203437	0.992	1	0.0050532
Hnrnpab	0.000353062	0.219147	0.992	0.992	0.00527098
H2afy2	0.000356184	0.204883	0.992	0.97	0.00528885
Idh3a	0.000369322	0.241985	0.812	0.654	0.00545178
Pdk1	0.000373052	-0.237473	0.361	0.466	0.00545178
Mrpl34	0.000373111	0.186471	0.977	0.977	0.00545178
Fam3c	0.000382623	0.247354	0.722	0.549	0.00553654
Sdf2l1	0.000383936	0.267228	0.744	0.594	0.00553654
P4ha1	0.000386508	-0.209395	0.436	0.654	0.00553654
Ssb	0.000386973	0.187683	1	1	0.00553654
Trim16	0.000393076	0.322083	0.496	0.316	0.00556336
Zfp566	0.000396549	-0.250186	0.308	0.526	0.00556336
Polr2l	0.000397941	0.253846	0.684	0.586	0.00556336
Arf4	0.000398086	0.20125	0.992	0.977	0.00556336
Mrpl49	0.000398974	0.234899	0.857	0.767	0.00556336
Ran	0.000401092	0.158832	1	1	0.00556465
Phb	0.000408169	0.217964	0.955	0.917	0.00563438
Snrnp40	0.000426536	0.202941	0.947	0.925	0.00585847
Fxyd2	0.0004334	-0.356675	0.323	0.496	0.00592313
Ddost	0.000442613	0.18831	0.977	0.977	0.00600998
Mvk	0.00044413	0.258206	0.654	0.504	0.00600998
Acot13	0.000451064	-0.223726	0.714	0.789	0.00607389
Timm50	0.000454787	0.21517	0.955	0.88	0.00608522
Dpp3	0.000456336	0.239994	0.767	0.632	0.00608522
Gm13305	0.000462432	-0.276888	0.158	0.406	0.00613671
Ythdf1	0.000479086	0.245261	0.82	0.654	0.00632716
Tomm40	0.000485775	0.208164	0.985	0.955	0.0063848
Naa50	0.000489778	0.22988	0.925	0.865	0.00638628
Csnk1e	0.000490962	0.217624	0.94	0.887	0.00638628
Ift46	0.000493077	-0.208869	0.504	0.617	0.00638628
Psat1	0.000495186	0.248307	0.677	0.579	0.00638628
Rnf26	0.000507207	0.243938	0.677	0.504	0.00651073
Clns1a	0.000513061	0.200671	0.977	0.932	0.00655525
Cox14	0.000518384	-0.146673	0.91	0.94	0.00657551
Acadm	0.000519434	-0.224693	0.474	0.632	0.00657551
Phf23	0.000527919	0.254975	0.752	0.609	0.00663426
Hyou1	0.000529847	0.248073	0.556	0.353	0.00663426
Nsmce1	0.000531321	-0.158089	0.865	0.97	0.00663426
Fnbp4	0.000536748	0.250084	0.699	0.549	0.0066484
Pcbp1	0.000537293	0.186766	0.992	1	0.0066484
Eif4a2	0.000542041	-0.19692	0.857	0.857	0.00667707
Tma7	0.000574149	0.146986	0.992	1	0.00704101
Lmnb1	0.000577452	0.271967	1	0.985	0.00705005
Wbp11	0.000590408	0.22108	0.977	0.955	0.0071548
Eif4a1	0.000591241	0.133531	1	1	0.0071548
Zwint	0.000601582	0.263394	0.925	0.82	0.00724801
Akap8	0.000623701	0.24354	0.805	0.677	0.00748169
Alas1	0.000630282	0.25231	0.579	0.444	0.00752776
mt-Nd6	0.000636493	-0.234158	0.602	0.729	0.00754744
Ssr1	0.000637551	0.262364	0.902	0.805	0.00754744
Adrm1	0.000640172	0.215464	0.917	0.872	0.00754744
Hpf1	0.000643192	0.213235	0.925	0.91	0.00755063
Jagn1	0.000648843	0.239424	0.842	0.699	0.00757287
Rreb1	0.000650599	-0.215269	0.331	0.511	0.00757287
Sumo2	0.000673633	0.132508	1	1	0.00780789
Sec11a	0.00068421	0.189901	0.985	0.962	0.00789716
Acot7	0.00068776	0.235431	0.737	0.519	0.00790492
Phf5a	0.000703403	0.188499	0.977	0.955	0.00805103
Ezh1	0.000725724	-0.213773	0.301	0.474	0.00827205
Cenpw	0.000730925	0.228801	0.962	0.887	0.00827323
Ndufa5	0.000731851	0.180006	0.985	0.97	0.00827323
Tanc1	0.000751662	-0.222158	0.759	0.827	0.00843373
Cadm1	0.000754129	0.249783	0.82	0.654	0.00843373
Tnfaip2	0.000755259	-0.239424	0.692	0.684	0.00843373
Mrps24	0.000772267	0.198237	0.977	0.977	0.00855488
Traf7	0.000774996	0.230727	0.805	0.684	0.00855488
Rbm4b	0.000777172	0.230942	0.729	0.586	0.00855488
Psmd7	0.000778566	0.190308	0.985	0.992	0.00855488
Zfp157	0.000782241	-0.239435	0.346	0.504	0.00856102
Ss18	0.000786004	0.249775	0.767	0.586	0.00856807
Grwd1	0.000794923	0.236769	0.752	0.549	0.00863104
Tmem97	0.000798848	0.245673	0.789	0.647	0.00863951
Hspa5	0.000805675	0.310185	1	0.985	0.00867917
Ide	0.000818946	-0.1814	0.722	0.842	0.00878767
Pomp	0.000822946	0.164369	0.992	1	0.00879624
Idi1	0.000831398	0.341303	0.752	0.639	0.00885213
Mat2a	0.000848056	0.319676	0.97	0.902	0.00899463
Hmgb3	0.000854506	0.212473	1	1	0.00902818
Slc25a19	0.000857906	0.239155	0.752	0.541	0.00902938
Tcp1	0.000865543	0.156685	0.992	1	0.00907498
Fam32a	0.000882438	0.240607	0.827	0.782	0.00921694
Psmc3ip	0.000890146	0.234899	0.887	0.699	0.00923686
Atp5o.1	0.000891069	0.134511	0.992	1	0.00923686
Tubb2b	0.000897245	0.401408	0.857	0.707	0.00926591
Dtymk	0.00090289	0.199514	0.962	0.947	0.00928928
Gadd45gip1	0.000921593	0.223144	0.902	0.782	0.00944633
Elavl1	0.000949311	0.195645	0.977	0.955	0.00969426
Smn1	0.00095767	0.230261	0.872	0.85	0.00974341
Ezr	0.000967268	-0.185911	0.932	0.962	0.00977219
Sfpq	0.000967614	0.252108	0.992	1	0.00977219
Msh3	0.000979655	0.234572	0.692	0.504	0.00985756
Pdrg1	0.00101224	0.230524	0.789	0.594	0.0101483
Tuba1a	0.00103171	0.277403	0.985	1	0.0103058
Eif4b	0.00104397	-0.126131	0.925	0.97	0.0103529
Ppp1r14a	0.00104642	-0.269333	0.18	0.376	0.0103529
Tecr	0.00104773	0.153487	0.985	1	0.0103529
Sfr1	0.00107138	0.172856	0.992	0.97	0.0105487
Cmtm8	0.00108095	-0.231374	0.496	0.609	0.0106049
Fam208a	0.00109999	-0.218689	0.436	0.541	0.0107533
Metap2	0.00112059	0.170238	1	0.985	0.0109158
Col26a1	0.00114414	0.27029	0.586	0.496	0.0111058
Dhcr7	0.00115022	0.252496	0.489	0.293	0.0111181
Gnai2	0.00115434	0.166047	1	0.992	0.0111181
Mthfd2	0.00115755	0.248833	0.669	0.474	0.0111181
Cnbp	0.00117978	0.165139	1	0.992	0.0112922
Mapre1	0.00118835	0.208834	0.94	0.947	0.0113347
Tenm4	0.00120374	-0.213245	0.789	0.82	0.0114417
G3bp2	0.0012377	0.198398	0.97	0.955	0.011724
Anp32b	0.00126401	0.154371	1	1	0.0119321
Sdf2	0.00126979	-0.189714	0.632	0.699	0.0119456
Trappc13	0.00127874	0.226622	0.767	0.647	0.0119887
Kras	0.00129855	0.255472	0.925	0.887	0.012133
Abhd16a	0.00131223	0.244692	0.887	0.805	0.0122193
Zfand5	0.00132178	0.209059	0.962	0.88	0.0122667
1110008F13Rik	0.00133875	0.188415	0.977	0.932	0.0123605
Eif4a3	0.00134089	0.185899	0.962	0.91	0.0123605
Mtx1	0.00137693	0.217723	0.82	0.639	0.0126352
Anxa6	0.00138084	0.299243	0.511	0.391	0.0126352
Snrpf	0.00139056	0.135507	1	0.992	0.0126352
Meaf6	0.00139167	0.22076	0.767	0.714	0.0126352
Sri	0.00139369	-0.165763	0.827	0.842	0.0126352
Nid2	0.00140885	0.256792	0.684	0.496	0.0127306
Homer2	0.00146128	0.244825	0.684	0.526	0.0131401
Wdr45b	0.00146374	0.240108	0.827	0.662	0.0131401
Ccdc8	0.0014912	-0.191422	0.496	0.586	0.0133174
Gmpr	0.00149317	-0.22037	0.729	0.767	0.0133174
Gmppb	0.00151895	0.234317	0.489	0.271	0.0135034
Mpc2	0.00152566	-0.254701	0.917	0.902	0.0135194
Utp3	0.00156369	0.192007	0.977	0.91	0.0138118
Glrx5	0.00156951	0.192855	0.962	0.94	0.0138188
Nme1	0.00157493	0.187872	1	1	0.0138222
Ndufb6	0.00159018	0.188767	0.962	0.97	0.0139115
Zranb2	0.00160662	0.195613	0.97	0.962	0.0140107
Scaf1	0.00161637	0.223881	0.699	0.594	0.0140511
Pcna	0.00162403	0.287682	0.752	0.662	0.0140732
Abhd14a	0.00165067	-0.196211	0.571	0.699	0.0142541
Mphosph10	0.00166085	0.225083	0.865	0.759	0.0142541
Kpna4	0.00166535	0.219823	0.902	0.767	0.0142541
Cyth2	0.00166566	0.228508	0.835	0.767	0.0142541
Cdca5	0.00168219	0.245673	0.632	0.459	0.0143509
Tes	0.00170975	0.257644	0.579	0.496	0.0145323
Hoxc6	0.00171403	-0.198973	0.541	0.639	0.0145323
Acat2	0.00173556	0.243126	0.774	0.699	0.0146695
Psma6	0.00180195	0.16682	0.977	0.985	0.0151597
Sae1	0.00180459	0.195347	0.962	0.962	0.0151597
Cpsf2	0.00185368	0.239987	0.82	0.759	0.0155246
Chmp6	0.00190749	0.226882	0.699	0.602	0.0159266
Bnip3l	0.00192725	-0.120313	0.977	0.985	0.0159718
Ankrd10	0.00193003	0.210504	0.865	0.82	0.0159718
Prpf31	0.00193034	0.205379	0.932	0.827	0.0159718
Mrpl20	0.00194138	0.187492	0.97	0.947	0.0159767
F11r	0.00194256	0.206863	0.797	0.662	0.0159767
Fasn	0.00195762	0.236389	0.669	0.571	0.0160246
Cald1	0.00196005	0.296113	0.857	0.714	0.0160246
Tmem267	0.00200674	0.302281	0.376	0.135	0.0163207
Phf20l1	0.00200815	0.219136	0.857	0.744	0.0163207
Cse1l	0.00205219	0.224212	0.835	0.752	0.0166222
Lsm12	0.00205735	0.181139	0.97	0.925	0.0166222
Cyp51	0.00210264	0.256241	0.722	0.609	0.016936
Fosb	0.00210852	-0.303408	0.481	0.586	0.016936
Uqcrc1	0.00212853	0.1674	0.985	0.947	0.0170316
Meg3	0.00213282	0.698342	0.338	0.188	0.0170316
Spag9	0.00215788	-0.185717	0.647	0.759	0.0171592
Nfe2l1	0.0021613	-0.1771	0.835	0.865	0.0171592
Rfc3	0.00217573	0.229994	0.925	0.872	0.017224
Scd2	0.00218327	0.220943	0.932	0.842	0.0172341
Canx	0.00221668	0.250225	0.947	0.94	0.0174364
Tmem234	0.0022216	0.17783	0.962	0.94	0.0174364
Anapc5	0.00223706	0.167195	0.977	0.977	0.0174926
Rbm39	0.00224719	0.137241	0.992	1	0.0174926
Ppp4c	0.00225127	0.214542	0.835	0.789	0.0174926
Atp5b	0.00225737	0.111213	0.992	1	0.0174926
Junb	0.00226061	-0.382417	0.579	0.632	0.0174926
Arhgap29	0.00228157	-0.342233	0.474	0.549	0.0176053
Mob2	0.00231052	0.207639	0.714	0.519	0.0177089
Polr2i	0.00231424	0.190077	0.947	0.955	0.0177089
Alyref	0.00231434	0.168954	0.985	0.992	0.0177089
Snhg18	0.0023496	-0.179754	0.714	0.744	0.0179288
Zfp30	0.00238671	-0.192766	0.511	0.602	0.0181615
Uqcr10	0.00240113	0.147714	0.985	1	0.0182208
Taf1d	0.00241873	0.209656	0.977	0.955	0.0183037
Hist1h4i	0.00244865	0.252496	0.669	0.534	0.0184792
Mrps15	0.00246939	0.189302	0.925	0.902	0.0185847
Cnpy3	0.00247738	0.209395	0.692	0.556	0.0185939
Ybx1	0.00249164	0.115541	1	1	0.0186499
2610318N02Rik	0.00256061	0.231802	0.699	0.526	0.0191141
Cenpu	0.00258401	0.240788	0.474	0.316	0.0192365
Fnbp1l	0.00262444	-0.14499	0.835	0.895	0.0194847
Taf11	0.00267741	0.203452	0.85	0.759	0.0198244
Sfrp1	0.00272628	0.262364	0.534	0.338	0.0200999
Ndufb7	0.00272925	0.155321	0.977	0.985	0.0200999
Kxd1	0.00275269	-0.152254	0.812	0.827	0.0201889
Plat	0.00275604	0.322399	0.835	0.827	0.0201889
Itpa	0.00277488	0.202524	0.895	0.759	0.0202271
Nfyb	0.00277598	0.21445	0.857	0.812	0.0202271
Ndufb8	0.00279157	0.150147	0.992	1	0.0202584
Prr15	0.00279503	-0.256824	0.233	0.391	0.0202584
Cox7b	0.00282097	0.14417	0.97	0.985	0.0203926
Rcc2	0.00285299	0.178463	0.955	0.97	0.0205447
Wwc1	0.00285697	0.239017	0.474	0.353	0.0205447
Txn2	0.00286796	0.19524	0.962	0.94	0.0205623
Mcm3	0.00287438	0.218383	0.91	0.91	0.0205623
Trp53rka	0.00291787	0.217185	0.534	0.368	0.0208192
Hist1h2bj	0.00292545	0.265703	0.496	0.338	0.0208192
Apoe	0.00293879	0.251314	0.526	0.466	0.0208545
Rangap1	0.00294559	0.268904	0.947	0.797	0.0208545
Prr5l	0.00296968	0.234905	0.789	0.722	0.0209184
Snrpb	0.00296985	0.129896	0.992	1	0.0209184
Atp5e	0.00298779	0.115617	1	1	0.020991
Cct8	0.00300885	0.151729	0.992	0.992	0.0210849
Got1	0.00303885	0.215209	0.812	0.654	0.0212385
Slc7a1	0.00304622	0.230956	0.511	0.368	0.0212385
Ctbp1	0.00307017	0.179097	1	0.94	0.0212861
Fuca2	0.00307638	-0.202712	0.271	0.429	0.0212861
Larp7	0.0030764	0.207418	0.947	0.872	0.0212861
Sf1	0.00308404	0.218608	0.887	0.797	0.0212861
Zc3h15	0.0031714	0.163098	0.992	0.992	0.0217372
Gtf2a2	0.00317191	0.188342	0.97	0.947	0.0217372
Brd3	0.00317314	0.184442	0.955	0.91	0.0217372
Akap11	0.00319732	0.219433	0.564	0.421	0.0218253
Ddx52	0.0032019	0.214576	0.857	0.789	0.0218253
Ptbp1	0.00324558	0.174353	0.977	0.97	0.0220056
Dnajc3	0.00324684	0.226095	0.85	0.737	0.0220056
Npnt	0.00326769	-0.30263	0.481	0.534	0.0220056
Fh1	0.00327371	0.191055	0.91	0.835	0.0220056
Sar1b	0.00328036	0.193066	0.925	0.835	0.0220056
Hmgn3	0.00328705	0.232148	0.835	0.774	0.0220056
Nxf1	0.00328807	0.189551	0.985	0.94	0.0220056
Ppid	0.00329242	0.215269	0.955	0.925	0.0220056
Arhgap28	0.00331594	-0.226382	0.271	0.391	0.0221089
Hsp90b1	0.0033324	0.250295	1	0.992	0.0221649
Coq2	0.00337287	0.204551	0.797	0.714	0.022375
H1fx	0.0033883	0.247301	1	0.985	0.022375
Cad	0.00339653	0.22608	0.579	0.579	0.022375
Phb2	0.00339658	0.155535	0.977	0.985	0.022375
Pfn1	0.00342782	0.131189	1	1	0.022462
Nasp	0.00344355	0.230323	0.992	1	0.022462
Aldh1a2	0.00344387	-0.24189	0.82	0.789	0.022462
Polr3d	0.00344558	0.217146	0.737	0.692	0.022462
Npy	0.00345066	-0.239375	0.699	0.774	0.022462
Fam168a	0.00349577	-0.180914	0.459	0.534	0.0227018
Fis1	0.00359374	0.168137	0.97	0.947	0.0232723
Elovl6	0.00360056	0.249496	0.774	0.707	0.0232723
Cenpn	0.00361473	0.216223	0.564	0.481	0.0233091
Nkain3	0.00363021	0.235314	0.511	0.316	0.023354
Ddx5	0.0036723	0.182981	1	1	0.0235697
Cks1b	0.00368243	0.197568	0.985	1	0.0235795
Rcc1	0.00370691	0.206756	0.692	0.609	0.0236441
Cdc26	0.00371338	0.184922	0.962	0.857	0.0236441
Copb2	0.00371833	0.214438	0.977	0.917	0.0236441
Eif2s2	0.00374843	0.158376	1	1	0.0236998
Slc25a5	0.0037521	0.165714	1	1	0.0236998
Rnf181	0.00375298	0.199333	0.571	0.376	0.0236998
Arf1	0.0037724	0.146447	1	0.992	0.0237679
Yaf2	0.00380912	0.198114	0.865	0.722	0.0239165
Ccz1	0.00381636	0.197757	0.872	0.714	0.0239165
B3gat3	0.00382399	0.202459	0.692	0.541	0.0239165
Atp5f1	0.00383082	0.119189	1	1	0.0239165
Txnl1	0.00385074	0.151466	0.977	1	0.0239864
Cdk7	0.00389939	0.207126	0.789	0.774	0.0242344
Akap8l	0.00393646	-0.169663	0.534	0.624	0.0243737
Tex30	0.00393955	0.208619	0.752	0.677	0.0243737
Prelid3b	0.00396167	0.202064	0.805	0.677	0.0244555
Wls	0.00397355	-0.181615	0.406	0.556	0.0244739
Srp9	0.00401012	0.157995	0.977	0.962	0.0246009
Jam3	0.00401397	0.219109	0.774	0.662	0.0246009
Gspt1	0.00402104	0.17478	0.97	0.955	0.0246009
Dmwd	0.00403228	-0.160221	0.677	0.714	0.0246148
Lgalsl	0.00405088	-0.179273	0.414	0.564	0.0246735
Ppp2ca	0.00406835	0.159735	1	0.985	0.0247007
Msi1	0.00407333	0.228974	0.421	0.256	0.0247007
Snrpd3	0.00409066	0.143421	1	1	0.0247512
Psmb5	0.00412202	0.137702	1	0.992	0.0248861
Ube2l3	0.00414124	0.15963	0.992	0.977	0.0249473
Srrt	0.00417997	0.216322	0.955	0.887	0.0251255
Tamm41	0.0041989	0.200259	0.654	0.451	0.0251842
Nol8	0.00423769	0.218254	0.594	0.504	0.0253615
Shisa4	0.00427031	0.200671	0.481	0.346	0.0254384
Cpsf4	0.00427437	0.217723	0.489	0.286	0.0254384
Mfge8	0.00427832	0.215642	0.955	0.91	0.0254384
Ncln	0.00433067	0.202941	0.579	0.526	0.0256454
Rbms2	0.00433181	-0.186175	0.586	0.602	0.0256454
Rars	0.00440993	0.182643	0.94	0.88	0.0260518
Eloc	0.0044439	0.166202	0.992	0.97	0.0261564
Gcdh	0.00445057	0.210295	0.481	0.308	0.0261564
2022-03-05	0.00446045	0.180147	0.97	0.902	0.0261564
mt-Nd4	0.00446573	0.142167	1	0.992	0.0261564
Pdia3	0.00449947	0.195989	1	0.97	0.026298
4933404O12Rik	0.00452597	0.325422	0.353	0.075	0.0263967
Stk4	0.00458504	0.209721	0.556	0.361	0.0266781
Ift27	0.00459365	0.202879	0.789	0.647	0.0266781
Naa15	0.00462385	0.232434	0.94	0.902	0.0267968
Cox17	0.00464263	0.202368	0.759	0.692	0.0268491
Dctpp1	0.00467909	0.170446	0.977	0.932	0.027003
Clint1	0.00469257	0.226773	0.842	0.752	0.0270241
Tspan3	0.00475824	0.153714	0.985	0.962	0.0273058
Mns1	0.00476137	0.217156	0.639	0.579	0.0273058
Itgb5	0.00484621	-0.25228	0.353	0.466	0.0277345
Rpa2	0.00487781	0.212112	0.872	0.759	0.0278278
Mrfap1	0.00488279	0.130064	1	1	0.0278278
Bok	0.0049128	0.219544	0.737	0.624	0.027889
Pa2g4	0.00491383	0.173462	0.962	0.977	0.027889
Fscn1	0.00495551	0.202443	0.947	0.925	0.0279872
Tfdp2	0.00496506	-0.156881	0.805	0.872	0.0279872
Nup85	0.00496835	0.197247	0.722	0.549	0.0279872
Pclaf	0.00497188	0.243933	1	0.977	0.0279872
Timm13	0.00501447	0.139184	0.992	0.992	0.0281692
S100a11	0.0050412	-0.202197	0.985	0.955	0.0282606
Pold4	0.00505551	-0.164177	0.526	0.624	0.0282606
Npr3	0.00506161	-0.321851	0.226	0.353	0.0282606
Fos	0.00509779	-0.359705	0.677	0.707	0.028338
Gps1	0.00510356	0.18327	0.887	0.872	0.028338
Paip2	0.00510641	0.165716	1	0.97	0.028338
Ppp1r14b	0.00512766	0.162793	1	1	0.0283986
Nsmce4a	0.00517067	0.174172	0.992	0.962	0.0285791
Eif4h	0.00518921	0.171416	0.992	0.985	0.028624
Akr1a1	0.00520432	0.140882	0.977	0.977	0.0286498
Iws1	0.00525381	0.24222	0.842	0.744	0.0288644
Senp8	0.00527125	-0.197977	0.233	0.376	0.0288904
Lmo4	0.00527957	-0.24018	0.549	0.586	0.0288904
Lyar	0.0053012	0.178861	0.977	0.955	0.028906
Letm1	0.00530346	0.201026	0.654	0.526	0.028906
Magoh	0.00532426	0.16257	0.992	0.992	0.0289619
Wdfy1	0.005349	0.232524	0.444	0.286	0.0290389
Kmt2e	0.00536773	-0.145136	0.902	0.955	0.0290676
Pcbp4	0.00537544	0.174523	0.962	0.917	0.0290676
Raf1	0.00541574	0.202524	0.729	0.624	0.0292112
Ppp1cc	0.00542327	0.160343	1	0.985	0.0292112
Mrpl12	0.00546454	0.15473	0.977	0.97	0.029336
Dnpep	0.00546779	-0.184429	0.654	0.729	0.029336
Setd5	0.0054925	-0.146603	0.82	0.895	0.0293842
Slc16a3	0.00549817	-0.180943	0.519	0.586	0.0293842
Slc25a4	0.00554732	0.111126	1	1	0.029543
Topbp1	0.0055494	0.218725	0.887	0.887	0.029543
Hdlbp	0.00559014	0.19165	0.955	0.91	0.0297023
Tsnax	0.00560303	0.194342	0.812	0.714	0.0297133
Kmt5c	0.00563103	0.207014	0.511	0.353	0.0297716
Pgrmc1	0.00563569	0.1785	0.97	0.872	0.0297716
Dhx8	0.00567567	0.195937	0.602	0.474	0.0298863
U2af1	0.00567916	0.148222	0.977	1	0.0298863
Clec18a	0.0056921	0.26995	0.895	0.865	0.0298971
G3bp1	0.00573322	0.171369	1	0.985	0.0300536
Dbnl	0.00574377	0.195153	0.85	0.805	0.0300536
Clcn3	0.00575909	-0.183034	0.481	0.579	0.0300765
Tesk1	0.00580666	0.190296	0.647	0.429	0.0302673
Fubp1	0.00582107	0.157668	1	0.992	0.030285
Ndufs4	0.00591639	0.156234	0.97	0.962	0.0307227
Fam160b1	0.00598701	-0.167835	0.338	0.474	0.0309795
Rnf6	0.00599458	-0.16457	0.714	0.684	0.0309795
Dkc1	0.00599967	0.169685	0.955	0.932	0.0309795
Dek	0.00601679	0.166942	0.992	1	0.0309981
Trim28	0.00602626	0.155506	0.992	0.992	0.0309981
U2af2	0.00603712	0.180444	0.932	0.932	0.0309981
Tnfaip8	0.00605821	-0.181072	0.602	0.632	0.0310483
Cwc15	0.0060817	0.172371	0.962	0.932	0.0311107
Hist1h1a	0.00616358	0.26581	0.586	0.489	0.0313741
Gdi2	0.00617825	0.157392	0.985	0.985	0.0313741
Rbm3	0.00618764	0.118765	0.992	1	0.0313741
Uck1	0.00618986	0.198851	0.511	0.338	0.0313741
Hnrnpc	0.00619192	0.14492	1	1	0.0313741
Prdx6	0.00620172	0.190808	1	0.985	0.0313741
Mrpl22	0.00622808	0.190599	0.857	0.744	0.0314495
Eps15	0.00629601	0.234029	0.489	0.391	0.0317342
Mitd1	0.00631056	0.193132	0.609	0.466	0.0317493
Zfp207	0.00632373	0.180262	0.947	0.902	0.0317574
Zfp326	0.00635726	0.211844	0.902	0.895	0.0318675
Pkn1	0.00638603	-0.16372	0.421	0.519	0.0319017
Eif1a	0.0063873	0.200084	0.872	0.82	0.0319017
Slc7a6os	0.0064518	0.193319	0.564	0.368	0.0321284
Lamp1	0.00646474	0.155779	0.97	0.962	0.0321284
Col1a2	0.00647694	0.436164	0.609	0.361	0.0321284
Suv39h2	0.00647949	0.194156	0.677	0.436	0.0321284
Exosc7	0.00652198	0.175468	0.925	0.925	0.0322808
Mdh2	0.00656414	0.143243	0.992	0.985	0.0324311
Aars	0.00662165	0.213259	0.609	0.466	0.0325771
Arpp19	0.0066258	0.148306	0.985	0.97	0.0325771
Hist1h3c	0.00664769	0.313129	0.647	0.519	0.0325771
Dgcr2	0.00665103	0.191395	0.684	0.519	0.0325771
Polr2f	0.00665299	0.1442	0.977	0.947	0.0325771
Vps28	0.00667364	-0.141707	0.714	0.782	0.0326201
Pdap1	0.00672582	0.158499	1	1	0.0328168
Spcs2	0.00675308	0.147823	0.992	0.947	0.0328913
Cby1	0.00677399	0.195745	0.767	0.662	0.0329348
Sgf29	0.00693351	0.197826	0.474	0.338	0.033613
Ube2d2a	0.00693796	0.180488	0.962	0.917	0.033613
Bnip3	0.00697701	-0.226773	0.173	0.353	0.0337013
Calml4	0.00698072	-0.548433	0.128	0.331	0.0337013
Ttc36	0.00700085	-0.555747	0.105	0.286	0.0337392
Fen1	0.00701706	0.221036	0.842	0.752	0.0337581
2010107E04Rik	0.00710272	0.142646	0.985	0.992	0.0341104
Eef1akmt1	0.00722263	0.185142	0.82	0.737	0.0346258
Hsph1	0.00733403	0.218002	0.752	0.602	0.0350446
Tbcc	0.0073355	0.189918	0.812	0.684	0.0350446
Dab1	0.00735331	-0.150639	0.639	0.722	0.0350687
Tchp	0.00738061	0.210014	0.444	0.308	0.0351379
Snrpa1	0.00741666	0.166414	1	0.955	0.0352484
Fam192a	0.00745746	0.187971	0.805	0.759	0.0353811
Cops6	0.00750558	0.153793	0.992	0.94	0.035548
Nsmce2	0.00760875	0.182322	0.91	0.85	0.0359746
Tor1aip1	0.00763211	0.210759	0.677	0.571	0.036023
Cacybp	0.00769779	0.176789	0.985	0.947	0.0362707
Dph3	0.0077142	0.176187	0.895	0.857	0.0362858
Ddit4	0.00775135	-0.206336	0.286	0.444	0.0363982
Ssrp1	0.00778827	0.139762	0.977	0.992	0.0365092
Atf4	0.00781975	0.188052	0.895	0.902	0.0365943
Cap1	0.00793089	0.19437	0.767	0.654	0.0370513
Mrto4	0.00802506	0.179266	0.932	0.895	0.0374265
AC160336.1	0.00803845	0.179395	0.985	0.917	0.0374265
Cldnd1	0.00809713	0.187796	0.82	0.729	0.0376359
Kif5b	0.00812725	0.153887	0.977	0.985	0.0377044
Rp9	0.00813932	-0.119715	0.962	0.955	0.0377044
Trappc12	0.00818561	0.204014	0.466	0.293	0.037855
Col3a1	0.00820317	0.385493	0.534	0.308	0.0378724
Tra2a	0.00822426	0.16116	0.977	0.985	0.0379061
Slc1a5	0.00827976	0.339507	0.331	0.06	0.038098
Tnpo1	0.00830671	0.198642	0.752	0.632	0.0380988
Armcx2	0.00830768	0.184779	0.684	0.511	0.0380988
Gm10093	0.00841582	-0.206132	0.195	0.361	0.0384881
Dnajc9	0.00842059	0.20012	0.97	0.947	0.0384881
Eif4ebp1	0.00844227	0.189174	0.91	0.842	0.0385231
Xpo4	0.00852967	0.193682	0.624	0.481	0.0388574
Limd2	0.00854574	0.185674	0.842	0.82	0.0388661
Zcchc8	0.00856001	0.198132	0.579	0.571	0.0388667
Stoml2	0.00862484	0.159207	0.955	0.88	0.0390558
Mars	0.00863009	0.184779	0.714	0.594	0.0390558
Ccdc66	0.00872393	-0.164875	0.451	0.466	0.0394155
Ndufa12	0.00888545	0.12679	0.992	1	0.0400794
Mettl9	0.00911938	0.148496	0.97	0.955	0.0410671
Basp1	0.00914209	0.252289	0.925	0.827	0.041102
Polr3k	0.00920219	0.175399	0.902	0.857	0.0413046
Igf1r	0.0092776	-0.144705	0.865	0.902	0.0415752
Bcap31	0.00931509	0.167971	0.902	0.82	0.0416358
Nudcd3	0.00932145	0.183415	0.88	0.782	0.0416358
Adgra3	0.00933685	0.183119	0.842	0.812	0.0416369
Trim37	0.00943956	0.195835	0.624	0.541	0.0420267
Creld2	0.00963103	0.191506	0.684	0.617	0.0428098
Sdhc	0.00967022	-0.118256	0.805	0.872	0.0428944
Rida	0.00968129	-0.185965	0.556	0.617	0.0428944
Grhpr	0.00970569	-0.155564	0.617	0.654	0.0429126
Impad1	0.00971666	0.182322	0.789	0.647	0.0429126
Lgr4	0.00979602	-0.180077	0.391	0.481	0.0431401
Bahcc1	0.00979956	-0.180437	0.248	0.406	0.0431401
Ewsr1	0.00986622	0.171748	1	0.977	0.0433046
Nudt19	0.00986846	-0.142083	0.579	0.624	0.0433046
Tmem258	0.00990866	0.147391	0.977	1	0.0433757
Derl1	0.00991625	0.179929	0.759	0.639	0.0433757
mt-Cytb	0.00996385	0.124867	1	1	0.0435146
Picalm	0.00999986	-0.155653	0.579	0.639	0.0435347
Dcakd	0.0100001	0.175294	0.917	0.902	0.0435347
Brca2	0.0100246	-0.16145	0.481	0.564	0.0435666
Brms1	0.0100392	0.216957	0.534	0.451	0.0435666
Atf1	0.0100912	-0.15019	0.534	0.654	0.043723
Polb	0.0101163	0.188221	0.789	0.782	0.0437627
Cebpg	0.010136	0.191055	0.805	0.782	0.0437791
Psmc2	0.0101623	0.157681	0.985	0.947	0.0438239
Dsp	0.0102906	0.307227	0.474	0.346	0.0443075
Ccdc25	0.0103667	0.258605	0.857	0.774	0.0445655
Ss18l2	0.0104243	0.18477	0.774	0.662	0.0446367
Desi2	0.010432	-0.134222	0.737	0.752	0.0446367
Ints7	0.010432	0.182322	0.571	0.444	0.0446367
Cenps	0.0104915	0.210179	0.707	0.617	0.0447918
Virma	0.0105018	0.20137	0.654	0.534	0.0447918
Rbm42	0.0105172	0.177905	0.865	0.797	0.0447918
Trmt6	0.0105659	0.18465	0.737	0.602	0.0449298
Cfl1	0.0106109	0.128448	0.992	1	0.0450091
L3mbtl2	0.0106174	0.204364	0.436	0.248	0.0450091
Polr3c	0.0106442	0.186776	0.579	0.481	0.0450534
Pcmtd1	0.0106938	-0.147158	0.519	0.579	0.0451935
Lrfn4	0.0107693	0.201101	0.511	0.429	0.0453977
Mrpl3	0.0107751	0.175732	0.857	0.767	0.0453977
Manbal	0.0108433	0.184158	0.714	0.586	0.0456148
Mgat4b	0.0109489	0.179586	0.759	0.617	0.0459769
Ppp2r2d	0.0109628	0.180772	0.797	0.684	0.0459769
Myo5a	0.0112053	0.203341	0.489	0.353	0.0468097
Myo6	0.0112094	-0.129653	0.827	0.917	0.0468097
Sqle	0.0112125	0.215111	0.692	0.617	0.0468097
Rdm1	0.0112499	-0.160989	0.466	0.579	0.0468944
Psmd2	0.0113574	0.148894	0.962	0.962	0.0472708
Mapk8ip1	0.0114157	0.180914	0.639	0.429	0.0474078
Lipg	0.0114274	-0.199757	0.308	0.406	0.0474078
Orc6	0.0114421	0.189542	0.842	0.865	0.0474078
Hist1h3e	0.0114732	0.256059	0.594	0.444	0.047465
Gar1	0.0114971	0.164828	0.925	0.91	0.0474926
Wiz	0.0115293	-0.136731	0.534	0.669	0.0475541
2022-09-11	0.011565	-0.16738	0.857	0.902	0.0476299
Ruvbl2	0.0116454	0.173635	0.902	0.789	0.0478891
Dhx15	0.0116871	0.16602	0.977	0.94	0.0479886
Gja1	0.0117265	0.265361	0.88	0.842	0.0480785
Epn1	0.0118734	0.178185	0.774	0.714	0.0485667
Gm37494	0.0118809	-0.166235	0.278	0.451	0.0485667
Prkag1	0.0119078	0.206004	0.737	0.632	0.0486044
Nubp1	0.0119976	0.198451	0.812	0.744	0.0488984
Akt1	0.0120194	0.180468	0.857	0.789	0.0489143
Ankrd37	0.0120763	-0.162519	0.398	0.451	0.0490609
Tmed9	0.0121115	0.154151	0.992	0.977	0.0490609
Ppp1ca	0.0121238	0.123001	0.992	1	0.0490609
Arl13b	0.0121268	-0.146815	0.421	0.519	0.0490609
Zfp260	0.012159	-0.131769	0.684	0.729	0.0491189
Isy1	0.0122431	0.187496	0.669	0.571	0.0493858
Nbr1	0.0122865	-0.15155	0.429	0.511	0.0494884
Ptges3	0.0123189	0.174985	0.985	0.992	0.0495462
Nt5dc2	0.012351	0.131327	0.992	1	0.0496025
Fam96b	0.0124291	0.182669	0.872	0.842	0.0498434
Pin4	0.0125088	0.166594	0.925	0.857	0.05009
Hmgcr	0.0125903	0.200095	0.759	0.564	0.0503429
Ppp1r12a	0.0126804	0.186636	0.887	0.789	0.0506296
Farsb	0.0127082	0.185606	0.744	0.609	0.0506623
Rilpl1	0.0127255	0.173663	0.617	0.451	0.0506623
Tssc4	0.0128301	0.174041	0.82	0.774	0.0509578
AU019823	0.0128368	0.179048	0.677	0.504	0.0509578
Ssu72	0.0128661	0.160075	0.895	0.925	0.0510003
Atic	0.0128967	0.194813	0.782	0.737	0.0510184
Get4	0.0129078	0.180051	0.737	0.609	0.0510184
Crk	0.0129757	0.193145	0.737	0.632	0.0511455
Cdca3	0.0129772	0.220927	0.872	0.752	0.0511455
Selenoh	0.0130783	0.129976	1	1	0.0514241
Pin1	0.0130853	0.149174	0.977	0.962	0.0514241
Gng5	0.0131579	0.117373	0.992	1	0.0516354
Cdc16	0.0132333	0.172942	0.895	0.865	0.0518572
Rrbp1	0.0132878	0.218429	0.977	0.947	0.0519593
Sap18	0.0132991	0.177983	0.917	0.925	0.0519593
H1f0	0.0133161	0.208345	0.902	0.872	0.0519593
Nabp2	0.0133432	0.165667	0.887	0.759	0.0519913
Col1a1	0.013401	0.386469	0.571	0.368	0.0521426
Fundc2	0.013465	-0.112039	0.88	0.947	0.0523175
Tbpl1	0.0135552	0.19969	0.85	0.737	0.0525476
Sapcd2	0.0135716	0.221489	0.511	0.353	0.0525476
Psma1	0.0135816	0.141051	0.985	0.977	0.0525476
Klf9	0.0137113	-0.174353	0.293	0.414	0.0529306
Chchd7	0.0137192	0.185806	0.774	0.737	0.0529306
Fkbp3	0.0137474	0.125305	0.992	0.992	0.0529586
Rnf167	0.0137718	0.187659	0.511	0.406	0.0529586
Ccm2	0.0138013	0.173472	0.609	0.466	0.0529586
Tmem199	0.0138035	0.173365	0.624	0.481	0.0529586
Nol11	0.0138379	0.194464	0.872	0.699	0.0530089
Ube2k	0.0138581	0.163406	0.94	0.925	0.0530089
Fkbp5	0.013888	0.191055	0.474	0.368	0.0530089
Arfrp1	0.0138939	0.191834	0.654	0.541	0.0530089
Ctdspl	0.0139665	0.184275	0.955	0.91	0.0532121
Fam98b	0.0140028	0.211735	0.714	0.699	0.0532765
Ezh2	0.0140357	0.172969	0.985	0.985	0.0532811
Lmnb2	0.0140428	0.1831	0.549	0.451	0.0532811
Uhrf1bp1l	0.0140966	0.197218	0.504	0.429	0.0534116
Kank3	0.0143456	-0.195974	0.263	0.414	0.05428
Dnase2a	0.0144265	0.184093	0.421	0.301	0.0544836
Bax	0.014439	0.149984	0.977	0.97	0.0544836
Efna4	0.0144835	0.174353	0.677	0.541	0.0545077
Hist1h2bm	0.0144851	0.217603	0.414	0.271	0.0545077
Pop4	0.0145202	0.173272	0.647	0.534	0.0545651
Zfp68	0.014604	-0.13508	0.481	0.609	0.0547079
Pofut2	0.0146091	0.173019	0.85	0.714	0.0547079
Med8	0.014618	0.180628	0.835	0.789	0.0547079
Ndufa9	0.0146947	0.168481	0.925	0.917	0.0549203
Ctsz	0.0147624	0.173213	0.805	0.699	0.0550983
Cdadc1	0.0149745	0.176529	0.549	0.398	0.0557562
Slc25a13	0.0149854	0.173382	0.526	0.353	0.0557562
Mta2	0.0149996	0.172571	0.722	0.639	0.0557562
Ncl	0.0150762	0.184287	1	0.992	0.0559652
Acer2	0.0152021	0.178039	0.459	0.301	0.0563564
Pbx2	0.015237	-0.140066	0.617	0.647	0.0564097
Tsn	0.0152581	0.140502	0.985	1	0.056412
Cdkn3	0.0152981	0.209254	0.504	0.383	0.0564836
Hnrnpa3	0.0153664	0.219724	1	1	0.0565966
Fat1	0.0153699	-0.157807	0.451	0.511	0.0565966
Rabl6	0.0154972	0.169131	0.857	0.789	0.0568898
Egr1	0.0155466	-0.347425	0.752	0.827	0.0568898
Anxa4	0.0155624	-0.199489	0.143	0.338	0.0568898
Sirt2	0.0155796	-0.137899	0.579	0.639	0.0568898
Hras	0.015592	0.161938	0.94	0.955	0.0568898
Pccb	0.0156055	-0.157092	0.353	0.436	0.0568898
Baz1b	0.0156236	0.233319	0.947	0.94	0.0568898
Trim2	0.0156362	0.190308	0.669	0.571	0.0568898
Cfl2	0.0156515	0.156774	0.97	0.925	0.0568898
Nop56	0.0156566	0.165142	0.97	0.947	0.0568898
Wwc2	0.0157284	-0.135438	0.737	0.789	0.0570754
Fads1	0.0157762	0.175633	0.669	0.489	0.0571731
Psmb3	0.0159798	0.127675	1	0.992	0.0578348
Ect2	0.0160091	0.193037	0.669	0.466	0.0578644
Cyr61	0.0160438	-0.279171	0.534	0.571	0.0579137
Tmem167	0.0160789	0.131847	0.985	0.985	0.0579643
Map2k2	0.0161941	0.144805	0.992	0.977	0.0582871
mt-Co3	0.0162188	0.12678	1	1	0.0582871
Tars	0.0162321	0.175449	0.767	0.579	0.0582871
Dnajc1	0.0162704	-0.1514	0.617	0.699	0.0583482
Rrm1	0.016332	0.167664	0.947	0.887	0.0584927
Wfdc2	0.0165164	0.315667	0.902	0.797	0.0590392
Atp5l	0.0165275	0.11608	0.992	1	0.0590392
Dnlz	0.016616	0.170171	0.835	0.707	0.0592782
Msmo1	0.0166933	0.256469	0.609	0.511	0.0594624
Zfp560	0.016711	-0.150913	0.436	0.519	0.0594624
Zfp428	0.0169035	0.168045	0.842	0.774	0.0600697
Bysl	0.0169432	0.185476	0.534	0.421	0.0601329
Dnajc25	0.017004	0.173382	0.504	0.406	0.0602049
Tmem230	0.0170073	-0.13206	0.526	0.654	0.0602049
Kansl2	0.0170919	0.165514	0.85	0.699	0.0604266
Mre11a	0.0171823	-0.138287	0.489	0.586	0.0606681
Rnf34	0.0172445	0.171626	0.662	0.466	0.0608094
Map4k4	0.0174004	0.189652	0.925	0.925	0.0612782
Cox7c	0.017422	0.105422	1	1	0.0612782
Dusp9	0.017466	0.205599	0.421	0.271	0.0613544
Nxt1	0.0175198	0.158658	0.925	0.797	0.0614649
Anxa2	0.0176231	-0.177072	0.647	0.737	0.0616696
Ptpn1	0.0176287	0.171422	0.85	0.737	0.0616696
Srebf2	0.0176455	0.212274	0.707	0.579	0.0616696
Wdr43	0.0177828	0.189394	0.947	0.91	0.0620703
Rps27l	0.0178497	0.133402	0.992	1	0.0622248
Actb	0.0179538	0.11018	1	1	0.0625082
Ywhah	0.0180292	0.17265	0.962	0.925	0.0626197
Dut	0.0180314	0.180823	0.97	0.977	0.0626197
Necap2	0.0181006	-0.138683	0.526	0.556	0.0627807
Rad17	0.0181728	0.170393	0.639	0.534	0.0629516
Sart3	0.0183156	0.180162	0.774	0.632	0.0633576
Cops3	0.0183361	0.150626	0.962	0.94	0.0633576
Bcat2	0.0183745	0.180649	0.82	0.744	0.0634103
Cyb5b	0.0184175	0.18899	0.624	0.564	0.0634319
Elob	0.0184269	0.115133	0.992	1	0.0634319
Usp6nl	0.0184733	-0.13847	0.346	0.511	0.0634656
Dazap1	0.0184829	0.153368	1	0.97	0.0634656
Grpel1	0.0185985	0.146399	0.97	0.947	0.0637829
Lad1	0.018803	-0.174941	0.293	0.398	0.0644037
Rad23a	0.0188434	0.184474	0.609	0.481	0.0644619
Pop7	0.0189267	0.168675	0.812	0.654	0.0646662
Hist1h2ae	0.0190111	0.463857	0.865	0.752	0.0648105
Hacd1	0.0190161	-0.149886	0.451	0.556	0.0648105
Mapk12	0.019075	0.203295	0.383	0.248	0.0649274
Zranb1	0.0190977	-0.111363	0.759	0.82	0.0649274
Mrps27	0.019169	0.170893	0.541	0.406	0.0650893
Jun	0.0192868	-0.201991	0.932	0.917	0.0653703
2210016F16Rik	0.0193124	0.165456	0.714	0.602	0.0653703
Ddb1	0.0193401	0.149612	0.94	0.902	0.0653703
Crkl	0.0193469	0.181471	0.474	0.323	0.0653703
Ywhab	0.0194008	0.141105	0.985	0.992	0.0654716
Bud31	0.0194925	0.164564	0.865	0.842	0.0657006
Lyrm9	0.0195433	0.168899	0.662	0.526	0.065791
Stip1	0.019587	0.15472	0.97	0.91	0.0658335
Lsm2	0.0196252	0.159717	0.97	0.985	0.0658335
Ublcp1	0.0196278	0.185717	0.767	0.571	0.0658335
Psmd8	0.0200362	0.131714	0.992	0.955	0.0671214
Mbd3	0.0202651	0.137918	1	0.985	0.0678054
Sephs1	0.0203705	0.159808	0.707	0.639	0.0680752
Psma7	0.0204477	0.12422	1	1	0.0682122
Usp14	0.0204612	0.163629	0.917	0.91	0.0682122
Rpl36a-ps1	0.0205098	-0.137331	0.331	0.481	0.0682914
Gli3	0.0206391	0.168966	0.504	0.368	0.0686388
Nphs1	0.0206897	-0.284931	0.233	0.301	0.0687237
Nhp2	0.0207232	0.14128	0.977	0.932	0.0687519
Anxa3	0.0208363	-0.191268	0.338	0.429	0.0690075
Pfdn6	0.0208505	0.143012	0.985	0.947	0.0690075
Adk	0.0209303	0.160815	0.895	0.85	0.0690829
Psma3	0.0209341	0.120493	0.992	1	0.0690829
Pnmal2	0.0209622	-0.188401	0.18	0.316	0.0690829
Dpysl2	0.0209739	0.18163	0.617	0.451	0.0690829
Rap1a	0.0210046	0.159129	0.887	0.865	0.0690959
Stub1	0.0210281	0.140826	0.962	0.977	0.0690959
Rabif	0.021063	0.173511	0.474	0.346	0.069128
Usp5	0.0212328	0.16508	0.714	0.504	0.0694439
Chmp1a	0.0212483	0.164432	0.617	0.421	0.0694439
Oxsr1	0.0212525	-0.143432	0.346	0.444	0.0694439
Pax8	0.0212604	0.206245	0.977	0.985	0.0694439
Ybx3	0.0213096	0.149014	0.977	0.985	0.0694919
Clcn4	0.0213605	0.167639	0.617	0.511	0.0694919
Mbnl1	0.0213658	0.172065	0.609	0.526	0.0694919
Vrk1	0.0213763	0.168208	0.752	0.707	0.0694919
Nrf1	0.0216788	0.182322	0.609	0.526	0.070392
1810055G02Rik	0.0218017	0.168966	0.571	0.353	0.0707076
Trim35	0.0219338	0.170987	0.887	0.857	0.0710521
Ilf3	0.0220311	0.179617	0.857	0.805	0.0712501
Cnpy2	0.0220582	0.143101	0.977	0.985	0.0712501
2810001G20Rik	0.0220728	0.165745	0.737	0.632	0.0712501
Mak16	0.0222	0.181346	0.782	0.722	0.0715769
Heatr6	0.0225423	0.163704	0.624	0.541	0.0725952
Acot1	0.0225795	-0.175649	0.707	0.722	0.0726299
Hnrnpk	0.0226434	0.120695	1	1	0.0726845
Papd4	0.0226494	0.163201	0.549	0.436	0.0726845
Camk2d	0.0226826	-0.188052	0.226	0.353	0.0727061
Csrp2	0.0227694	-0.186877	0.932	0.955	0.0728625
Zfand3	0.0227845	0.163011	0.744	0.639	0.0728625
Coro1c	0.0228436	0.168036	0.586	0.489	0.072916
Btg1	0.0228543	-0.117961	0.932	0.902	0.072916
Ap3s2	0.0228873	0.168335	0.632	0.496	0.0729366
Ccdc85b	0.0229307	0.163935	0.609	0.541	0.0729374
Abhd4	0.022945	-0.188591	0.173	0.316	0.0729374
Nfkbib	0.0229672	0.165985	0.556	0.436	0.0729374
Eif2b3	0.0231696	0.173923	0.729	0.586	0.0734563
Anapc15	0.0232625	0.170106	0.744	0.677	0.0734563
Jund	0.0232645	0.142029	1	1	0.0734563
Txndc9	0.0232797	0.177548	0.91	0.827	0.0734563
Rnase12	0.0232904	0.251314	0.376	0.233	0.0734563
Dnajc8	0.0232926	0.138731	0.985	0.962	0.0734563
Hells	0.0233178	0.228026	0.865	0.812	0.0734563
Ptcd2	0.0235617	0.159688	0.767	0.602	0.0741398
Cdk19	0.0236037	-0.153433	0.361	0.436	0.0741868
Ppp1r11	0.0236637	0.154422	0.917	0.827	0.0742709
Mgea5	0.0236845	0.182322	0.669	0.549	0.0742709
Golga7	0.023884	0.161913	0.827	0.684	0.0748111
Snhg12	0.0240178	0.173423	0.684	0.617	0.0751217
Abhd17b	0.0240469	0.160881	0.707	0.564	0.0751217
Rprd2	0.024121	-0.127339	0.489	0.579	0.0751217
Nelfcd	0.0241232	0.161388	0.842	0.744	0.0751217
Hk2	0.0241285	-0.143926	0.579	0.662	0.0751217
Sdc4	0.0241729	-0.148923	0.872	0.917	0.0751217
Zwilch	0.0241849	0.166281	0.511	0.383	0.0751217
Slc39a7	0.024246	0.172489	0.895	0.895	0.0751217
Mrps5	0.0242509	0.162701	0.917	0.865	0.0751217
Mrps12	0.0242737	0.161024	0.895	0.782	0.0751217
Mlf2	0.024284	0.141304	1	0.932	0.0751217
Skp2	0.0243323	0.189028	0.692	0.647	0.0751866
Actl6a	0.0243622	0.14562	0.977	0.955	0.0751943
Prdx4	0.0244183	0.140826	0.955	0.955	0.0752272
Gna11	0.0244276	0.158171	0.872	0.752	0.0752272
Psmc1	0.02455	0.152498	0.955	0.955	0.0755194
Med9	0.0245928	0.162809	0.789	0.752	0.0755663
Rrp8	0.0247346	0.162339	0.714	0.564	0.0759128
Fam172a	0.0247799	-0.131028	0.519	0.617	0.0759128
Luc7l	0.024799	0.156054	0.865	0.774	0.0759128
Pam	0.0248161	0.183159	0.481	0.331	0.0759128
Smarcc1	0.0248908	0.174841	0.977	0.985	0.0759935
Hbp1	0.0248978	-0.122602	0.579	0.639	0.0759935
Ptpn14	0.024939	-0.114063	0.759	0.774	0.0760247
Airn	0.0249735	0.188508	0.383	0.338	0.0760247
Pi4k2a	0.0250104	0.180998	0.624	0.496	0.0760247
Spire1	0.02502	-0.132425	0.436	0.526	0.0760247
Spdl1	0.0250464	0.231537	0.654	0.398	0.0760247
Cux1	0.0250877	-0.104834	0.895	0.94	0.0760661
Zfp422	0.0251226	0.158824	0.895	0.865	0.0760879
Sf3a3	0.0251633	0.151258	0.932	0.895	0.0761272
Dhx30	0.0252042	0.175094	0.744	0.639	0.0761673
Homer3	0.0252562	0.16738	0.624	0.504	0.0762405
AU020206	0.0253697	0.157845	0.489	0.308	0.0764576
Slc9a5	0.0254135	0.330242	0.316	0.038	0.0764576
Nav1	0.0254304	0.175405	0.556	0.466	0.0764576
Dbp	0.0254395	-0.162795	0.218	0.383	0.0764576
Lyplal1	0.0255819	-0.142372	0.301	0.391	0.0768017
Gm8186	0.0257935	0.160527	0.857	0.744	0.0772756
Banf1	0.0258082	0.148838	1	1	0.0772756
Mcat	0.0258242	0.163201	0.579	0.414	0.0772756
Kctd20	0.0259362	0.156004	0.571	0.444	0.0774757
Mrps7	0.0259475	0.14499	0.947	0.865	0.0774757
Rmnd1	0.0260019	-0.142174	0.459	0.481	0.0775539
Nup98	0.0260499	-0.12801	0.444	0.564	0.0775602
Ap3m1	0.026067	0.177072	0.474	0.331	0.0775602
Scaper	0.0260887	-0.138586	0.376	0.526	0.0775602
Tsfm	0.0263076	0.151359	0.827	0.805	0.0781264
Tor1a	0.0263884	0.159358	0.759	0.669	0.0782819
Zfp637	0.0264705	-0.115342	0.677	0.744	0.0784405
Ptov1	0.0268385	0.103874	1	1	0.0794455
Phkb	0.0269329	-0.146093	0.278	0.383	0.079639
Cisd2	0.0270596	0.153834	0.917	0.82	0.0799027
Eif4g2	0.0270802	0.130555	0.992	1	0.0799027
Cmtm4	0.0271368	0.171318	0.451	0.353	0.0799313
Fam69b	0.0271481	-0.127339	0.481	0.571	0.0799313
Apbb1	0.0272288	0.162751	0.526	0.398	0.0800831
Cdkn2aip	0.0273626	0.142316	0.586	0.489	0.0803904
Eef1g	0.0274393	0.111068	1	1	0.0805296
Sh3pxd2b	0.0274939	-0.132897	0.361	0.466	0.0805594
Chaf1b	0.0275081	0.211758	0.774	0.714	0.0805594
Fahd1	0.0275921	-0.124409	0.451	0.571	0.0807193
Dlat	0.027636	0.177514	0.617	0.534	0.0807618
Ubap2	0.0276916	0.195745	0.827	0.737	0.0808382
Myo1e	0.0278305	-0.178692	0.293	0.368	0.0811577
Vsig8	0.0281632	0.260415	0.316	0.15	0.0820406
Hnrnpll	0.0281993	0.176529	0.827	0.782	0.0820588
Cox4i2	0.0282887	-0.218879	0.571	0.594	0.0822319
Phldb2	0.0284	-0.192262	0.895	0.865	0.082468
Cdk2	0.0284918	0.172333	0.511	0.429	0.0824912
Kdm3a	0.0285185	-0.122602	0.346	0.481	0.0824912
Psma4	0.0285278	0.118894	1	0.992	0.0824912
Gtpbp4	0.0285335	0.159906	0.925	0.872	0.0824912
Rnps1	0.0285856	0.152785	0.94	0.932	0.0824912
Mrps18a	0.0286102	0.144911	0.955	0.947	0.0824912
0610030E20Rik	0.0286182	0.151619	0.617	0.414	0.0824912
Slx1b	0.0286522	-0.243078	0.098	0.293	0.0825028
Rcl1	0.0288348	0.171392	0.541	0.466	0.0828916
Numa1	0.0288476	0.185142	0.774	0.692	0.0828916
Taf3	0.0288798	0.159573	0.759	0.579	0.0828975
Med19	0.028974	0.142933	0.85	0.729	0.0830557
Zfp821	0.0290148	0.153599	0.684	0.564	0.0830557
Zfp281	0.0290262	0.165366	0.609	0.481	0.0830557
Slc38a1	0.0290559	0.164828	0.857	0.82	0.0830557
Cops4	0.0291704	0.143707	0.97	0.925	0.0832964
Chtf8	0.0292723	0.161376	0.872	0.714	0.0834696
Cpxm1	0.0292918	0.167538	0.699	0.617	0.0834696
Nsrp1	0.0294171	0.151231	0.947	0.827	0.0836789
Smc3	0.0294262	0.139409	0.962	1	0.0836789
Gm2000	0.0294918	-0.145455	0.391	0.398	0.0837788
Rrp7a	0.0295891	0.158748	0.714	0.571	0.0839682
Plin3	0.0297532	-0.126836	0.519	0.654	0.0843065
Fam222b	0.0297697	-0.179152	0.165	0.308	0.0843065
Dpm2	0.029824	0.154659	0.744	0.632	0.0843734
Rps27rt	0.0298692	-0.129617	0.511	0.564	0.0844143
Mthfsd	0.0299194	0.157265	0.586	0.481	0.0844694
Swap70	0.0301038	-0.155702	0.301	0.406	0.0849026
Mcrip1	0.0301686	0.14842	0.94	0.925	0.0849753
Smndc1	0.0301914	0.15869	0.714	0.677	0.0849753
Acin1	0.0303475	0.128633	0.992	0.977	0.0852636
Eef2k	0.0303959	-0.142316	0.248	0.346	0.0852636
Commd7	0.0304041	0.167329	0.624	0.556	0.0852636
Atg4d	0.030418	0.183227	0.414	0.293	0.0852636
Thoc6	0.0306273	0.157361	0.774	0.669	0.0857627
Neat1	0.030753	-0.286228	0.203	0.241	0.0860269
Psip1	0.0308321	0.135886	0.992	1	0.0861451
Xpo1	0.030858	0.161213	0.857	0.699	0.0861451
Vbp1	0.0309166	0.163354	0.94	0.895	0.0861533
Itga1	0.0309438	-0.255525	0.143	0.271	0.0861533
Dbr1	0.030955	0.164139	0.436	0.331	0.0861533
Pdcd11	0.0310558	0.167466	0.82	0.752	0.0863465
Mrps36	0.0311276	0.159784	0.902	0.91	0.0863547
Psmc5	0.0311567	0.125528	0.992	0.985	0.0863547
Srsf1	0.0312003	0.174165	0.962	0.91	0.0863547
Snhg9	0.0312032	-0.132897	0.346	0.466	0.0863547
Mtx2	0.031216	0.140147	0.925	0.917	0.0863547
Pes1	0.0312985	0.155216	0.699	0.564	0.0864961
Glrx3	0.0313917	0.116616	0.985	1	0.0866663
Fkbp9	0.0314498	0.155686	0.669	0.586	0.0867236
Elp5	0.0314756	0.157831	0.714	0.624	0.0867236
Cd151	0.0315972	0.168716	0.782	0.692	0.0869716
Lrrc8d	0.0316743	0.178039	0.451	0.346	0.0870963
Dhcr24	0.0317964	0.192991	0.466	0.323	0.0871911
Nap1l4	0.0318146	0.156688	0.962	0.955	0.0871911
M6pr	0.0318332	0.156346	0.654	0.534	0.0871911
Cryzl2	0.0318576	-0.142722	0.256	0.361	0.0871911
Ppp5c	0.0318674	0.155193	0.684	0.617	0.0871911
Ttf2	0.0320369	0.202613	0.421	0.286	0.0875675
Pgp	0.0321088	0.169767	0.94	0.925	0.0876571
1810058I24Rik	0.0322155	0.147974	0.97	0.91	0.0876571
Sco2	0.0322192	-0.136132	0.316	0.429	0.0876571
Stk16	0.0322455	0.158703	0.842	0.752	0.0876571
Rce1	0.0322838	0.15509	0.752	0.669	0.0876571
Prpf40a	0.032285	0.142727	0.977	0.97	0.0876571
Gcn1l1	0.032293	0.166556	0.714	0.579	0.0876571
Cd24a	0.0326027	0.154151	0.985	0.947	0.0884102
Prpsap1	0.032722	0.157579	0.887	0.797	0.0886462
Coro1b	0.0328486	-0.115134	0.707	0.722	0.0888249
Hist1h2ab	0.032854	0.288553	0.571	0.481	0.0888249
Bcar3	0.0328849	-0.17185	0.226	0.346	0.0888249
Mrpl41	0.0330589	0.157788	0.82	0.744	0.0891098
Pimreg	0.0330817	0.219964	0.669	0.586	0.0891098
Plekhj1	0.0330877	0.150282	0.857	0.774	0.0891098
Rlf	0.0332932	-0.110066	0.632	0.714	0.0894908
Fndc3a	0.0332943	-0.135388	0.534	0.609	0.0894908
Spry1	0.0334129	-0.113238	0.714	0.767	0.0896628
Polr2h	0.0334236	0.148641	0.88	0.782	0.0896628
Wdr82	0.0334572	0.157861	0.707	0.579	0.0896652
Vkorc1	0.0336043	-0.140649	0.421	0.541	0.0899717
Ctps	0.0337058	0.151916	0.85	0.744	0.0901557
Slirp	0.0337822	0.141684	0.925	0.902	0.090234
Tomm70a	0.0338525	0.156452	0.82	0.729	0.090234
Vamp7	0.0339209	0.152839	0.549	0.444	0.090234
Dck	0.0339241	0.15847	0.519	0.353	0.090234
Ppp4r2	0.0339613	0.147506	0.925	0.88	0.090234
Gpat4	0.0339635	0.154151	0.677	0.594	0.090234
Itgav	0.033965	-0.131645	0.338	0.421	0.090234
Rnf220	0.0341358	0.170697	0.639	0.579	0.090487
Phlda1	0.0341434	0.164808	0.489	0.376	0.090487
Carhsp1	0.0341591	0.167318	0.699	0.602	0.090487
Birc5	0.0342335	0.205871	0.97	0.887	0.0905967
Coq7	0.0343086	0.137241	0.947	0.94	0.0907082
Set	0.0346122	0.156682	1	1	0.0914227
Ypel3	0.034827	-0.124592	0.647	0.639	0.0919017
Cited2	0.0349425	-0.120101	0.932	0.947	0.0920323
Helz	0.0349435	0.157506	0.835	0.805	0.0920323
2022-09-09	0.0350069	0.156698	0.526	0.406	0.0921111
Atp2a2	0.0350892	0.17161	0.88	0.759	0.0922394
Chm	0.0351464	-0.135709	0.248	0.368	0.0923014
Cpn1	0.0352812	-0.209721	0.18	0.331	0.0924463
Desi1	0.0352942	0.153543	0.594	0.451	0.0924463
Ucp2	0.0353026	0.166235	0.774	0.669	0.0924463
Tagln2	0.0353362	0.17984	0.564	0.504	0.0924463
Dera	0.0353754	0.143101	0.812	0.714	0.0924606
Chd3	0.0355328	-0.10683	0.744	0.752	0.0926993
Sar1a	0.0355536	0.160085	0.88	0.835	0.0926993
Mpdu1	0.0355679	0.152428	0.632	0.474	0.0926993
Podxl	0.0356239	-0.259958	0.226	0.308	0.0927384
Fam117b	0.0356799	0.155564	0.489	0.391	0.0927384
Ddx6	0.0356842	0.152924	0.895	0.865	0.0927384
Bmp4	0.0357291	-0.148027	0.917	0.895	0.0927674
Hes1	0.0359544	0.262935	0.91	0.857	0.0932643
Hs2st1	0.0360381	0.163424	0.714	0.564	0.0933453
Eif1ax	0.0360675	0.120177	0.992	0.992	0.0933453
Loxl1	0.0360986	-0.170182	0.414	0.421	0.0933453
Bzw1	0.0361319	0.138408	1	0.985	0.0933453
Pkp4	0.0361785	-0.132573	0.496	0.549	0.0933453
Tmem35a	0.0361896	0.216528	0.376	0.233	0.0933453
Tnni1	0.0363418	-0.19628	0.383	0.459	0.0936038
Tial1	0.036358	0.162961	0.805	0.722	0.0936038
Mrpl55	0.0365764	0.147214	0.85	0.759	0.0940358
Arl14ep	0.0366106	0.176456	0.398	0.256	0.0940358
Pus10	0.0366587	0.1692	0.466	0.278	0.0940358
Tbc1d4	0.0366627	-0.132547	0.466	0.571	0.0940358
Siah1a	0.0367402	0.14787	0.684	0.564	0.0941468
Ap1ar	0.0369262	0.173019	0.669	0.647	0.0944849
Tmem242	0.0369409	0.173721	0.617	0.489	0.0944849
Mycbp	0.0371626	0.154151	0.624	0.556	0.0948935
Mrpl47	0.0371698	0.150573	0.594	0.519	0.0948935
Adsl	0.0372456	0.158778	0.699	0.624	0.0949988
Gxylt2	0.0373244	0.166886	0.827	0.744	0.0951114
Ccdc124	0.0375818	0.162519	0.947	0.895	0.0956785
Osbpl1a	0.0376847	-0.135227	0.414	0.504	0.0958516
Mdk	0.0377929	0.120509	1	0.992	0.0960381
Rabac1	0.0378689	-0.108951	0.744	0.805	0.0960766
Pibf1	0.037878	0.173798	0.511	0.414	0.0960766
Ak6	0.0380422	0.158433	0.857	0.774	0.096404
Lpl	0.0381788	-0.131963	0.571	0.647	0.0966127
Pex14	0.0381949	0.145788	0.564	0.444	0.0966127
Cops8	0.0383428	0.167549	0.872	0.857	0.0968976
Gstk1	0.038447	0.192803	0.361	0.248	0.0970717
Lima1	0.038674	-0.129339	0.414	0.519	0.097555
Tbc1d9b	0.0387231	-0.15924	0.226	0.338	0.0975706
Mesd	0.0387585	0.14939	0.835	0.759	0.0975706
Glt8d1	0.0388143	-0.119545	0.556	0.624	0.0975706
Nsun2	0.0388582	0.158771	0.827	0.759	0.0975706
Celsr2	0.0388717	0.156306	0.752	0.632	0.0975706
Strip1	0.0388933	0.167054	0.451	0.286	0.0975706
Gmps	0.03899	0.179876	0.925	0.932	0.0977239
Ube2e1	0.039105	0.143558	0.91	0.902	0.0979228
Khsrp	0.0392384	0.156894	0.744	0.692	0.0980701
Msh6	0.0392642	0.157062	0.714	0.632	0.0980701
Cdc20	0.0393052	0.274154	0.752	0.707	0.0980701
Sh3bgr	0.0393066	0.189405	0.406	0.286	0.0980701
Cct2	0.039353	0.12581	0.992	0.992	0.0980969
Mfap1b	0.0395775	0.154854	0.489	0.376	0.098567
Gins1	0.0396806	0.173176	0.556	0.451	0.0987343
Bex3	0.0397462	0.107013	0.977	1	0.0988079
Lgmn	0.0398314	-0.127213	0.564	0.602	0.0989301
Luc7l3	0.0399623	0.131863	0.992	0.985	0.0991657
Oat	0.0400601	0.16572	0.932	0.895	0.0993186
Hes6	0.0403215	0.153204	0.707	0.579	0.0997891
Klhdc2	0.0403479	0.131543	0.985	0.955	0.0997891
Zcrb1	0.0403588	0.13201	0.977	0.992	0.0997891
Prrx1	0.0404008	-0.188401	0.195	0.308	0.099803
Ldb1	0.0404933	-0.113195	0.594	0.609	0.099895
Nde1	0.0405108	0.21412	0.789	0.699	0.099895
Nsdhl	0.0406223	0.165985	0.496	0.376	0.10008
Cdk5rap1	0.0407401	-0.132268	0.361	0.444	0.100281
Spout1	0.0408851	0.156842	0.662	0.579	0.100464
Pelp1	0.0409319	0.15749	0.707	0.602	0.100464
Gatd1	0.0409461	-0.122148	0.504	0.571	0.100464
Lrwd1	0.0409815	0.14813	0.549	0.549	0.100464
Jpt2	0.0410092	0.140265	0.617	0.541	0.100464
Cdc42bpa	0.0410359	-0.105003	0.541	0.602	0.100464
Yif1b	0.0410989	0.147405	0.85	0.842	0.100464
Wfs1	0.0411074	-0.11973	0.459	0.549	0.100464
Sf3b5	0.0412036	0.124697	0.992	0.977	0.100469
Tmx1	0.0412128	0.15329	0.767	0.722	0.100469
Lin9	0.0412276	0.169292	0.459	0.421	0.100469
Hspe1	0.0412556	0.141223	1	1	0.100469
Ndufv1	0.0413356	0.134257	0.94	0.932	0.100537
Scg5	0.0413566	0.272258	0.308	0.083	0.100537
Mydgf	0.0415333	0.14183	0.917	0.887	0.100877
Eif2s1	0.0417161	0.140773	0.977	0.985	0.101231
Csnk2b	0.041911	0.131146	0.977	0.962	0.101557
Tox4	0.0419738	0.149212	0.669	0.579	0.101557
Rpf1	0.041974	0.170743	0.782	0.722	0.101557
Dnttip2	0.0420356	0.136798	0.902	0.842	0.101557
Maz	0.0420367	0.132925	0.932	0.91	0.101557
Klf7	0.0420719	-0.133063	0.474	0.624	0.101557
Qtrt1	0.0423451	0.168983	0.549	0.436	0.102126
Retreg1	0.0424336	-0.204413	0.286	0.383	0.10225
Celsr1	0.0425589	0.152469	0.617	0.571	0.102462
Esf1	0.0426699	0.140632	0.962	0.932	0.102639
Cdk13	0.0427587	0.16134	0.662	0.594	0.102716
Praf2	0.0427805	0.152137	0.549	0.429	0.102716
Ormdl1	0.042814	0.159065	0.586	0.496	0.102716
Rabggtb	0.043052	0.14842	0.737	0.654	0.103197
Fam210a	0.0431227	0.150727	0.526	0.414	0.103276
Arf2	0.0431615	0.159542	0.459	0.301	0.103279
Rdh10	0.0432929	-0.14676	0.526	0.662	0.103428
Psmc3	0.0432991	0.127339	0.977	0.985	0.103428
Ndufab1	0.0433447	0.113543	0.992	0.992	0.103447
Rer1	0.0434018	0.133953	0.947	0.947	0.103494
Plce1	0.0436063	-0.147325	0.278	0.331	0.103834
Vta1	0.0436202	0.146064	0.805	0.714	0.103834
Chchd3	0.0436909	0.143536	0.865	0.902	0.103848
Haghl	0.0437077	-0.126218	0.421	0.511	0.103848
Rpgrip1l	0.0437394	0.173663	0.353	0.256	0.103848
Cdc37	0.0439761	0.110651	0.985	1	0.10432
Rpn2	0.0441069	0.136293	0.962	0.94	0.10454
Pcif1	0.0442027	-0.10567	0.677	0.699	0.104574
Ube2d3	0.0442223	0.121517	0.985	0.985	0.104574
Rrn3	0.0442356	0.153433	0.466	0.406	0.104574
Ubxn6	0.0442811	-0.103403	0.699	0.714	0.104592
Cmtm3	0.0444905	0.163109	0.549	0.556	0.104917
Ramp2	0.0444952	-0.139031	0.669	0.744	0.104917
Prdm2	0.0445804	-0.111918	0.444	0.534	0.105025
Slc35b1	0.0446175	0.146451	0.752	0.624	0.105025
Gas1	0.0448648	-0.136915	0.82	0.789	0.105517
Cnot6	0.0449336	0.153064	0.895	0.887	0.105588
Ppil3	0.0450277	0.145082	0.722	0.579	0.105719
Rpap1	0.0451799	0.165792	0.406	0.286	0.105934
Smdt1	0.0451966	0.124952	1	0.992	0.105934
S100a1	0.0453162	-0.121144	0.504	0.519	0.106124
Ints14	0.0455259	0.156842	0.489	0.421	0.106359
Rtf1	0.0455426	0.1317	0.97	0.97	0.106359
Cars	0.0455753	0.162056	0.534	0.376	0.106359
Rnf165	0.0456261	0.152385	0.549	0.459	0.106359
Dynll1	0.0456386	0.128811	1	0.992	0.106359
Gabpa	0.0456489	0.156219	0.489	0.414	0.106359
Tmem121	0.0457085	0.174803	0.391	0.271	0.106408
Kars	0.0458441	0.144739	0.812	0.737	0.106623
Ankzf1	0.0458786	-0.167054	0.278	0.316	0.106623
Crtc3	0.0460144	0.153558	0.586	0.496	0.106848
Sass6	0.0461329	0.145293	0.586	0.504	0.106947
Syncrip	0.0461638	0.146116	0.97	0.955	0.106947
Tab2	0.0461735	0.161735	0.707	0.617	0.106947
Sdc2	0.0462484	-0.160104	0.526	0.564	0.106963
Rpap2	0.0462707	-0.115999	0.278	0.436	0.106963
Smtnl2	0.0463323	0.148711	0.549	0.489	0.106963
Pard6g	0.0463363	0.145712	0.624	0.564	0.106963
Lrig3	0.0464056	-0.110227	0.729	0.752	0.10699
Stxbp4	0.0464347	0.158605	0.489	0.346	0.10699
Aen	0.046465	0.14693	0.647	0.564	0.10699
Paxip1	0.0465685	0.146603	0.489	0.361	0.107139
Sltm	0.0467534	0.16784	0.977	0.94	0.107474
Dlg4	0.0468135	-0.157392	0.203	0.346	0.107508
Zmynd19	0.0468465	0.156948	0.737	0.654	0.107508
Smim12	0.0469161	0.14528	0.684	0.579	0.107578
Ubtf	0.0472335	0.147605	0.932	0.895	0.108157
Ssbp4	0.0473093	0.133531	0.917	0.902	0.108157
Akap12	0.0473124	-0.176456	0.767	0.744	0.108157
Gorasp2	0.0473262	0.148533	0.744	0.632	0.108157
Cebpz	0.0474296	0.164362	0.917	0.872	0.108252
Rabgap1	0.0474465	-0.116217	0.594	0.617	0.108252
Rnf215	0.0475782	-0.131422	0.286	0.361	0.108462
D430042O09Rik	0.047647	-0.135956	0.338	0.429	0.108529
Slc35a1	0.0477486	-0.112329	0.624	0.677	0.108671
Exoc4	0.0478262	-0.129092	0.504	0.541	0.108757
Igfbp4	0.0479042	0.187212	0.91	0.767	0.108762
Smad7	0.0479076	-0.108289	0.639	0.684	0.108762
Kin	0.0480692	-0.102415	0.647	0.707	0.108823
Hdgfl2	0.0480727	0.146183	0.857	0.82	0.108823
Gpc1	0.0480888	0.14499	0.684	0.564	0.108823
Rpn1	0.0481101	0.175828	0.902	0.91	0.108823
Atg16l1	0.0481325	0.161388	0.414	0.271	0.108823
Fstl1	0.0481751	0.191931	0.917	0.932	0.10883
Tbc1d5	0.0482356	-0.13623	0.286	0.391	0.108877
Rora	0.0485411	-0.167054	0.241	0.323	0.109476
Pcbd1	0.0486596	-0.110957	0.639	0.729	0.109654
Amn1	0.0487747	-0.118716	0.474	0.571	0.109823
Rsbn1	0.0488689	-0.119021	0.556	0.579	0.109945
Lpgat1	0.0489934	0.141798	0.662	0.489	0.110135
Got2	0.0491732	0.152933	0.932	0.895	0.110449
Panx1	0.0492138	0.15341	0.481	0.323	0.11045
Zc3h18	0.0493862	0.162903	0.782	0.759	0.110746
Serpine2	0.0494395	0.177072	0.414	0.316	0.110775
Pla2g12a	0.049589	0.147734	0.782	0.789	0.11102
Fam126a	0.049649	0.162235	0.406	0.248	0.111027
Orai1	0.0496731	0.168262	0.421	0.353	0.111027
Aurkaip1	0.0497816	0.127728	0.962	0.932	0.111105
Vdac2	0.0498084	0.100112	0.992	1	0.111105
H19	0.0498296	0.188498	0.985	0.97	0.111105
Coq5	0.0500496	0.140986	0.752	0.564	0.111506
Pdgfc	0.0501099	-0.151881	0.233	0.353	0.111549
Rnf8	0.0501992	0.145182	0.639	0.534	0.111658
Ghr	0.0503128	-0.134222	0.278	0.346	0.111666
Knl1	0.050321	0.1471	0.789	0.571	0.111666
Nfkbia	0.0503583	-0.107699	0.609	0.639	0.111666
Nmral1	0.0503656	0.14718	0.797	0.759	0.111666
Ank3	0.0506216	-0.124791	0.564	0.639	0.112072
Car12	0.0506303	0.192647	0.617	0.526	0.112072
Ubqln2	0.0507106	0.149274	0.774	0.684	0.112134
Vps50	0.0507399	-0.10683	0.398	0.504	0.112134
Pno1	0.0508235	0.14944	0.722	0.647	0.112212
Tpm1	0.050872	-0.102615	0.977	0.962	0.112212
Palm	0.0508976	0.154151	0.812	0.789	0.112212
Jmjd1c	0.0511345	-0.105025	0.654	0.624	0.112644
Dap	0.05127	0.133244	0.827	0.774	0.112794
Dync2li1	0.0512848	-0.106972	0.699	0.699	0.112794
Kif23	0.0515549	0.216808	0.737	0.714	0.113297
Psmc4	0.0515978	0.114192	0.985	0.985	0.113301
Skil	0.0517447	-0.108096	0.383	0.534	0.113533
Cox18	0.0520574	0.146008	0.632	0.474	0.114128
Cnksr2	0.0521366	0.171272	0.406	0.271	0.114145
Smad4	0.0521486	0.135989	0.925	0.88	0.114145
Hist1h2bb	0.0522563	0.174803	0.391	0.271	0.11429
Mis12	0.0523193	0.158941	0.617	0.489	0.114337
Cs	0.0525212	0.144799	0.827	0.714	0.114552
Faf1	0.0525344	-0.103704	0.647	0.677	0.114552
Trmt13	0.052543	0.150518	0.436	0.391	0.114552
Hoxa7	0.0525893	0.14944	0.752	0.639	0.114562
Sntb2	0.0527232	0.154706	0.624	0.556	0.114763
Pnn	0.0529263	0.171889	0.992	0.992	0.115114
Fbxw5	0.0529728	-0.114959	0.331	0.429	0.115124
Fhl2	0.0530904	-0.161268	0.308	0.331	0.115281
Polr2k	0.0531292	0.132489	0.925	0.91	0.115281
Tmem14c	0.0533837	0.14527	0.925	0.91	0.115742
Lamtor5	0.0534331	0.13939	0.917	0.865	0.115758
Mier1	0.0534945	0.150013	0.947	0.872	0.115799
Snapc5	0.053586	0.147636	0.744	0.654	0.115906
Fam149a	0.0536517	-0.177983	0.12	0.301	0.115957
Immt	0.0537345	0.135967	0.925	0.962	0.116045
Cyb5a	0.0538412	-0.108169	0.857	0.887	0.116077
Shisa3	0.0538729	-0.202613	0.263	0.308	0.116077
Ctu2	0.0538761	0.141728	0.617	0.481	0.116077
Cacng4	0.0539492	0.224742	0.571	0.444	0.116143
Mpst	0.0540113	-0.118036	0.88	0.842	0.116186
Cdr2	0.0542101	0.154898	0.444	0.316	0.116416
Pde3b	0.0542253	-0.12485	0.331	0.376	0.116416
Plk1	0.0542639	0.224248	0.609	0.511	0.116416
Sdccag3	0.054288	0.144581	0.549	0.489	0.116416
Cdk2ap2	0.054433	0.144208	0.812	0.752	0.116636
Hist2h2ac	0.0545068	0.238751	0.632	0.534	0.116689
Nisch	0.0545428	0.155476	0.97	0.955	0.116689
Tsc22d2	0.0546045	0.152874	0.534	0.391	0.11673
Rcbtb2	0.0547732	0.146263	0.865	0.759	0.116857
Zfp516	0.0547793	-0.105608	0.729	0.789	0.116857
Timp2	0.0548363	0.162751	0.955	0.895	0.116857
Spopl	0.0548378	-0.103797	0.301	0.444	0.116857
Chd9	0.0549258	-0.109845	0.549	0.602	0.116857
Wdr6	0.054926	0.140431	0.714	0.624	0.116857
Tbc1d16	0.0549671	0.143673	0.549	0.489	0.116857
Cdh4	0.0550039	0.198104	0.835	0.707	0.116857
Tfdp1	0.0550814	0.142174	0.835	0.759	0.116931
Tmem248	0.0552169	0.13815	0.481	0.406	0.117061
Gars	0.0552277	0.154151	0.835	0.88	0.117061
Ift52	0.0552801	-0.107033	0.564	0.602	0.117081
Trip6	0.0555405	-0.108214	0.594	0.624	0.117542
Tcp11l1	0.0556666	0.137689	0.564	0.383	0.117718
Tbl3	0.0558629	0.145712	0.624	0.594	0.118043
Armc1	0.0559807	0.135206	0.85	0.729	0.118132
Hdac1	0.0560154	0.137046	0.895	0.85	0.118132
Ankrd13a	0.0560342	0.148745	0.526	0.406	0.118132
Evi5	0.0560905	-0.10313	0.692	0.759	0.11816
Cd83	0.056147	0.166127	0.368	0.226	0.118188
Foxd1	0.0562697	-0.214814	0.293	0.346	0.118356
Zscan18	0.0563665	-0.146032	0.165	0.308	0.118469
BC017643	0.0567421	-0.125505	0.248	0.346	0.119167
Khdrbs3	0.0567921	0.148364	0.94	0.917	0.119181
Ccs	0.0569518	-0.123869	0.579	0.571	0.119425
Tlnrd1	0.0570165	0.14183	0.466	0.398	0.119469
Tmed1	0.0571311	0.14842	0.895	0.827	0.119564
Lcmt1	0.0571486	0.145712	0.722	0.707	0.119564
Crabp2	0.0574057	0.235829	0.331	0.256	0.119975
E2f3	0.0574325	0.164962	0.805	0.729	0.119975
Wnt4	0.0575087	0.322393	0.88	0.842	0.120043
Zfp213	0.0577881	0.168821	0.383	0.233	0.120534
Sec13	0.0579078	0.142097	0.902	0.835	0.120546
Clic5	0.0579137	-0.289325	0.113	0.218	0.120546
Gprc5c	0.0579489	-0.109562	0.586	0.594	0.120546
Ola1	0.0579832	0.129038	0.94	0.925	0.120546
Hist1h3a	0.058013	0.183337	0.361	0.188	0.120546
Alg13	0.0580843	0.151806	0.451	0.293	0.120603
Plec	0.0581553	-0.117783	0.406	0.526	0.120659
Cebpb	0.0584977	-0.123614	0.308	0.376	0.121278
Enpep	0.058636	-0.103946	0.564	0.556	0.121473
Ipo7	0.0588649	0.155702	0.744	0.699	0.121855
Borcs6	0.0594081	-0.127597	0.211	0.368	0.122887
Cul5	0.0595057	0.147214	0.805	0.737	0.122996
1500009L16Rik	0.0595543	0.158546	0.496	0.459	0.123004
Crtap	0.0596793	-0.110785	0.519	0.549	0.123138
Slc39a1	0.0597371	0.148053	0.436	0.346	0.123138
Cdc123	0.0597536	0.140791	0.917	0.932	0.123138
Ptpn12	0.0602589	0.143673	0.609	0.436	0.124086
Ywhag	0.0603529	0.154562	0.759	0.677	0.124187
Maip1	0.0605495	0.134681	0.722	0.684	0.124498
Anapc11	0.0606579	0.138426	0.932	0.895	0.124628
Vps36	0.0607781	0.144463	0.872	0.82	0.124684
Ticrr	0.0607863	0.151231	0.466	0.331	0.124684
Atr	0.0608214	-0.12189	0.368	0.474	0.124684
Zmym3	0.060908	-0.128712	0.271	0.376	0.124768
Eif1ad	0.0610219	0.147746	0.797	0.722	0.124908
Preb	0.0611418	0.143788	0.669	0.624	0.124989
Pts	0.0611965	0.138683	0.647	0.511	0.124989
Ccdc28b	0.0613128	-0.111704	0.398	0.526	0.124989
Rbm7	0.0613401	0.135341	0.744	0.647	0.124989
Zw10	0.0613934	0.137986	0.496	0.346	0.124989
Fras1	0.0614518	-0.112673	0.654	0.669	0.124989
Hnrnpd	0.0614679	0.142275	0.992	1	0.124989
Akt1s1	0.0614847	0.14201	0.85	0.669	0.124989
Pgm2	0.061505	-0.122602	0.308	0.421	0.124989
Ufd1	0.0615162	-0.10291	0.632	0.654	0.124989
Meox2	0.0616685	-0.186586	0.128	0.263	0.125049
Hexa	0.0616737	-0.10904	0.451	0.519	0.125049
Pgd	0.0616822	0.146441	0.677	0.624	0.125049
Kctd6	0.0617628	-0.120364	0.263	0.368	0.125092
Nars	0.061833	0.1514	0.94	0.932	0.125092
Psmd1	0.0618559	0.13508	0.962	0.932	0.125092
Bin1	0.0618855	0.132666	0.737	0.586	0.125092
Ebna1bp2	0.0621134	0.129394	0.932	0.925	0.12546
Gemin5	0.0622478	0.144039	0.526	0.383	0.125639
Tead1	0.0623612	-0.13459	0.835	0.827	0.125775
Pip4k2c	0.062477	0.175311	0.376	0.195	0.125917
Hmgb2	0.0625444	0.173481	1	1	0.12596
Xrcc1	0.0628949	0.1415	0.835	0.782	0.126557
Ndrg2	0.0629331	-0.176931	0.271	0.316	0.126557
Sncaip	0.0630862	-0.109699	0.737	0.782	0.126772
Crebrf	0.0631454	-0.138726	0.211	0.316	0.126781
Nipsnap3b	0.0632094	0.137508	0.602	0.504	0.126781
Galnt7	0.063229	0.149113	0.466	0.338	0.126781
Mdh1	0.0635024	0.10543	1	0.992	0.127236
Dtnbp1	0.0637429	0.13815	0.85	0.752	0.127625
Ube2g2	0.0640405	0.13411	0.571	0.436	0.128086
BC005561	0.0640663	0.134545	0.887	0.835	0.128086
Lman2l	0.0641285	0.1471	0.414	0.278	0.128117
Rdx	0.0642105	0.107256	0.985	0.992	0.128188
Tmem216	0.0644519	0.141651	0.436	0.286	0.128442
Enkd1	0.0644625	0.140184	0.526	0.353	0.128442
Rpl7l1	0.064566	0.146675	0.962	0.902	0.128442
Szrd1	0.0645683	0.145653	0.639	0.632	0.128442
Cdc42ep3	0.064666	-0.226124	0.271	0.331	0.128442
Ubxn8	0.0646719	0.149532	0.451	0.338	0.128442
Tmem138	0.0647034	0.149212	0.609	0.481	0.128442
Tdg	0.0647118	0.142629	0.85	0.812	0.128442
Cdc42ep4	0.0647918	0.148263	0.564	0.414	0.128508
Rrp12	0.0651397	0.203076	0.331	0.12	0.129104
Uggt1	0.0651871	0.135876	0.519	0.391	0.129105
Arl2bp	0.065329	0.147357	0.842	0.805	0.129293
Scrib	0.0654502	0.146603	0.564	0.504	0.12944
Lsm3	0.065638	0.128777	0.962	0.97	0.129718
Bicc1	0.0657121	-0.111038	0.549	0.541	0.129771
6330403K07Rik	0.0657879	0.179915	0.406	0.353	0.129801
Tmpo	0.0658226	0.140147	0.985	0.992	0.129801
Ddx39	0.0658691	0.135065	0.947	0.917	0.129801
Tmed10	0.0659207	0.120607	0.985	0.985	0.129809
Tspan33	0.0660603	0.147259	0.496	0.398	0.129991
Lrrfip1	0.066201	-0.13847	0.368	0.391	0.130175
Snap47	0.0664559	0.139072	0.707	0.684	0.130583
Pex11a	0.0667377	-0.125505	0.233	0.338	0.131039
Mxd3	0.0667965	-0.113867	0.338	0.436	0.131039
Kti12	0.0668316	0.136652	0.699	0.617	0.131039
Mgst1	0.066964	-0.199713	0.699	0.82	0.131206
Mrpl9	0.0670253	0.12913	0.842	0.744	0.131232
Asf1b	0.0673139	0.137742	0.609	0.489	0.131703
Morc2a	0.0674694	0.164622	0.421	0.278	0.131914
Larp1	0.0677431	0.165392	0.805	0.797	0.132354
Cand1	0.0683124	0.143926	0.752	0.639	0.133372
Mrpl16	0.0683994	0.131928	0.737	0.662	0.133442
Nfkb1	0.0684457	-0.111881	0.639	0.692	0.133442
Smyd5	0.068613	0.136966	0.556	0.383	0.133674
Jsrp1	0.0687482	-0.114019	0.353	0.459	0.133785
Utp23	0.0687676	0.140417	0.496	0.368	0.133785
Smchd1	0.0690424	0.136309	0.947	0.902	0.134163
Cyc1	0.0690802	0.109822	0.97	0.962	0.134163
Atf5	0.0691084	0.145182	0.414	0.331	0.134163
Safb2	0.0692308	0.170472	0.782	0.774	0.134247
Dnajb6	0.0692493	0.125645	0.977	0.925	0.134247
Tpbg	0.0693507	0.13456	0.571	0.474	0.134274
Cript	0.0693612	0.134067	0.902	0.865	0.134274
2410018L13Rik	0.0695017	-0.10904	0.459	0.459	0.134381
Ahctf1	0.0695586	0.149532	0.744	0.609	0.134381
Traf2	0.0696022	0.142048	0.451	0.376	0.134381
Ube2a	0.0696118	0.134196	0.805	0.789	0.134381
Psmd6	0.0701515	0.114263	0.97	0.977	0.135274
Gpx3	0.0702142	-0.151318	0.316	0.301	0.135274
Psmd12	0.070315	0.116921	0.985	0.985	0.135274
Znrf1	0.0703248	0.137899	0.609	0.549	0.135274
Phc2	0.0704784	0.128976	0.789	0.752	0.135274
Prmt1	0.0705004	0.106547	0.992	1	0.135274
Fam105a	0.0705964	0.156204	0.662	0.504	0.135274
Atp2b1	0.0706541	0.136798	0.932	0.857	0.135274
Mark4	0.0706723	0.170869	0.346	0.203	0.135274
Ipo5	0.0706945	0.139031	0.895	0.797	0.135274
Ube2o	0.070721	-0.103612	0.436	0.511	0.135274
Snx3	0.0707258	0.121398	0.992	0.977	0.135274
Rab10	0.0708265	0.131209	0.88	0.85	0.135274
Mrpl30	0.0708392	0.120391	0.977	0.917	0.135274
Add3	0.0708514	-0.102072	0.662	0.699	0.135274
Hnrnpu	0.0708625	0.20291	1	0.992	0.135274
Erlec1	0.0709574	-0.109199	0.579	0.624	0.135304
Slc37a4	0.0709768	0.174023	0.549	0.459	0.135304
Nup153	0.0712271	0.142533	0.564	0.444	0.135578
Adipor2	0.0712554	0.136966	0.549	0.406	0.135578
Zcchc6	0.0713027	-0.112619	0.549	0.624	0.135578
Nt5c	0.0713242	0.13084	0.684	0.579	0.135578
Hdgf	0.0713672	0.107672	1	0.992	0.135578
Unc5c	0.0714648	-0.122131	0.707	0.714	0.13567
Cflar	0.07167	-0.108634	0.263	0.406	0.135928
Fbxw8	0.0717	0.140417	0.451	0.383	0.135928
Fam49b	0.0718993	0.161741	0.902	0.789	0.13619
Bzw2	0.0719584	0.124697	0.97	0.962	0.13619
Ttc1	0.0720912	0.135709	0.805	0.744	0.13619
Tacc3	0.0720998	0.140023	0.85	0.677	0.13619
Arhgap24	0.0721201	-0.1831	0.301	0.398	0.13619
0610010K14Rik	0.0721788	0.155485	0.722	0.699	0.13619
Ogfod3	0.0721852	0.137621	0.586	0.511	0.13619
Plscr3	0.0723108	-0.107486	0.632	0.632	0.136289
Amer1	0.0724302	-0.101783	0.549	0.639	0.136289
Pole2	0.0724335	0.151139	0.459	0.308	0.136289
Etf1	0.0724549	0.155616	0.902	0.865	0.136289
Mob1a	0.0724856	0.13939	0.549	0.444	0.136289
Ppp6c	0.0727571	0.131928	0.586	0.519	0.136612
Erc1	0.0727572	-0.107989	0.466	0.481	0.136612
Nucb1	0.0728291	0.133531	0.842	0.789	0.136654
Brwd1	0.0730144	0.14499	0.654	0.602	0.136908
Tmem183a	0.0730929	0.141881	0.797	0.707	0.136962
Atox1	0.0733082	0.124681	0.91	0.902	0.137255
Ubac2	0.073349	0.127994	0.647	0.526	0.137255
Mme	0.0734285	-0.23578	0.188	0.278	0.13731
Dpp4	0.0738833	-0.201686	0.173	0.316	0.138011
Eif2s3y	0.0739039	0.194443	0.421	0.316	0.138011
Zfp706	0.0741503	0.120032	0.97	0.97	0.138377
Ifnar1	0.07424	-0.115999	0.353	0.383	0.13845
Lamtor1	0.0749454	0.136576	0.895	0.917	0.139671
Sac3d1	0.0750275	0.136197	0.662	0.609	0.139729
Wars	0.0751382	0.13621	0.556	0.451	0.139841
Katnb1	0.0756465	0.13708	0.511	0.406	0.140691
Rab8a	0.0759559	0.132873	0.827	0.759	0.141159
Cnppd1	0.0760099	-0.126195	0.248	0.323	0.141159
Gclc	0.0760523	0.129077	0.602	0.436	0.141159
Fam171a1	0.0763914	0.13847	0.466	0.361	0.141693
Ap4s1	0.076486	0.130236	0.677	0.541	0.141773
Tmem147	0.0767149	0.128649	0.895	0.865	0.142101
Fpgs	0.076801	-0.110932	0.316	0.338	0.142165
Eftud2	0.0768868	0.130918	0.865	0.857	0.142227
Nuf2	0.0769381	0.174049	0.579	0.504	0.142227
Araf	0.0770391	0.135923	0.632	0.571	0.142318
Prpf3	0.0772373	0.136293	0.496	0.444	0.142588
Plin2	0.0773874	-0.108894	0.481	0.504	0.14271
Reep3	0.0774071	0.142781	0.805	0.782	0.14271
Mrps21	0.0776536	0.111974	0.977	0.97	0.143068
Kctd1	0.07773	-0.108854	0.391	0.398	0.143113
Tmeff1	0.0777958	0.132447	0.789	0.677	0.143138
Arhgap32	0.0778496	-0.136132	0.308	0.361	0.143141
Tead2	0.0779528	0.130398	0.962	0.962	0.143235
Arxes2	0.0780249	0.136798	0.414	0.293	0.143272
Lonp1	0.0781944	0.13428	0.767	0.714	0.143487
Isyna1	0.0782661	0.131618	0.895	0.902	0.143523
Fut8	0.0783822	0.16734	0.594	0.571	0.14364
Slc29a1	0.0785184	0.176227	0.376	0.331	0.143793
Nudt9	0.0787422	-0.105035	0.647	0.692	0.144032
Wwtr1	0.0787838	-0.111918	0.481	0.489	0.144032
Tmem65	0.078806	-0.101096	0.338	0.421	0.144032
Zfp36l1	0.0790006	-0.11037	0.857	0.85	0.144292
Adam17	0.0791456	-0.107054	0.263	0.383	0.14434
Dot1l	0.0791514	0.13906	0.556	0.504	0.14434
Donson	0.0791848	0.145712	0.451	0.368	0.14434
Dlst	0.0792509	0.142883	0.744	0.639	0.144365
Pole4	0.0793123	0.132407	0.842	0.857	0.144381
Pus1	0.0794539	-0.106565	0.526	0.579	0.144426
Anapc2	0.0794714	0.131769	0.669	0.639	0.144426
Nthl1	0.0794948	-0.104313	0.301	0.429	0.144426
Ifrd1	0.0796295	0.134408	0.662	0.669	0.144575
Slbp	0.0797792	0.151231	0.925	0.85	0.144669
Kif21a	0.0797864	0.15535	0.481	0.421	0.144669
Wipi2	0.0800792	0.134016	0.662	0.534	0.144922
Pitpnb	0.0801447	0.132172	0.805	0.744	0.144922
Wrap73	0.0801907	0.12371	0.586	0.534	0.144922
Mis18a	0.0802614	0.131401	0.609	0.496	0.144922
Psme2	0.0802825	0.133531	0.835	0.759	0.144922
Gpr180	0.080291	0.121607	0.564	0.436	0.144922
Adi1	0.0802954	0.160682	0.489	0.429	0.144922
Nans	0.0803888	0.139885	0.82	0.782	0.144969
Ubap1	0.0804269	0.139552	0.459	0.383	0.144969
Hoxa5	0.080656	0.17185	0.391	0.308	0.145287
Arrdc3	0.0808819	-0.151641	0.226	0.301	0.145598
Gm10073	0.0810281	0.13084	0.647	0.556	0.145766
Ndufc1	0.0811473	0.103463	1	0.992	0.145885
Dazap2	0.0812159	0.129212	0.827	0.699	0.145912
Srsf10	0.0813756	0.130314	0.977	0.985	0.145981
Rrp36	0.0813867	0.131769	0.489	0.459	0.145981
Ccnl2	0.0814596	0.135311	0.887	0.805	0.145981
Thumpd1	0.0815149	0.154151	0.707	0.684	0.145981
Nceh1	0.08152	-0.141079	0.173	0.323	0.145981
Atf6b	0.0817949	0.129339	0.632	0.429	0.146317
Srrm2	0.0818137	0.103828	0.985	1	0.146317
Cryab	0.0822527	-0.278591	0.263	0.338	0.146907
Arpc2	0.0822758	0.124235	0.985	0.985	0.146907
Dusp6	0.0823045	-0.137056	0.256	0.301	0.146907
Gnl3	0.0824877	0.1591	0.94	0.94	0.147139
Chd1	0.0826136	0.147893	0.91	0.805	0.147268
Tbc1d17	0.0828202	-0.103479	0.541	0.594	0.14754
Impa1	0.0829126	0.123998	0.722	0.632	0.147609
Atp1a1	0.083091	0.127319	0.895	0.865	0.147812
Dpy30	0.0831339	0.122005	0.985	0.962	0.147812
Mex3a	0.0834374	0.142215	0.917	0.857	0.148127
Mtpn	0.083454	0.133284	0.895	0.865	0.148127
Usf1	0.0835836	0.132547	0.654	0.571	0.148127
Clptm1	0.0836223	0.127539	0.677	0.556	0.148127
Abhd8	0.0836454	0.13088	0.549	0.481	0.148127
B3glct	0.0837211	0.139314	0.414	0.353	0.148127
Plekhm2	0.0837462	0.154151	0.391	0.218	0.148127
Wdr36	0.083794	0.139762	0.519	0.398	0.148127
Msra	0.0837965	0.123986	0.639	0.496	0.148127
Cnn3	0.0840297	0.13391	0.985	0.955	0.148443
Micu2	0.0841948	0.140807	0.692	0.579	0.14864
Fbxo34	0.0842542	0.15104	0.414	0.263	0.148649
Ankib1	0.0844046	-0.117182	0.286	0.406	0.148819
4833439L19Rik	0.0845982	0.137674	0.654	0.519	0.149064
Trib2	0.08507	0.164622	0.617	0.526	0.149734
Noc4l	0.0850875	0.138971	0.624	0.617	0.149734
Clptm1l	0.0851816	0.130697	0.722	0.609	0.149804
Matr3	0.0853338	0.124618	0.985	0.985	0.149976
Klhdc4	0.085537	0.136197	0.662	0.632	0.150237
Xbp1	0.0856407	0.185451	0.677	0.624	0.150323
Usp1	0.0858545	0.130927	0.977	0.94	0.150602
Pole3	0.0859865	0.128319	0.91	0.902	0.150737
Nmd3	0.0861737	0.131963	0.752	0.662	0.150874
Decr1	0.0862021	-0.102331	0.857	0.887	0.150874
Sesn1	0.0862297	0.13411	0.511	0.368	0.150874
Bms1	0.0865833	0.151509	0.805	0.677	0.151333
Lhfpl2	0.0866018	0.157716	0.489	0.406	0.151333
Trmt2a	0.0867308	0.131266	0.549	0.414	0.151462
Atf7ip	0.086818	0.136012	0.684	0.639	0.151518
0610005C13Rik	0.0870994	0.170626	0.331	0.188	0.151797
Insig1	0.0871257	0.154151	0.331	0.271	0.151797
Mogs	0.0871437	0.134819	0.767	0.767	0.151797
Trub2	0.0872668	0.131028	0.489	0.331	0.151876
Rbmx	0.0872995	0.159301	0.895	0.88	0.151876
Rad51	0.0874122	0.146982	0.789	0.669	0.151976
Zdhhc16	0.0874718	0.130362	0.541	0.504	0.151983
Slc30a3	0.08778	0.267063	0.248	0.083	0.152422
Mum1	0.0879262	0.128728	0.737	0.624	0.152574
E2f8	0.0879788	0.13939	0.556	0.391	0.152574
Spindoc	0.088148	0.145026	0.361	0.226	0.152771
Mfsd14b	0.0885597	-0.120364	0.233	0.316	0.153192
Tomm34	0.0885609	0.127646	0.511	0.383	0.153192
Mtpap	0.088671	0.126867	0.511	0.436	0.153192
Hebp1	0.0886726	-0.101003	0.406	0.459	0.153192
Zfp846	0.0887477	0.169718	0.353	0.233	0.153192
Sdr39u1	0.0887714	0.132268	0.451	0.316	0.153192
Map2k7	0.0887814	-0.113164	0.429	0.481	0.153192
Dohh	0.0889316	0.130197	0.812	0.647	0.153355
Nme2	0.0892775	0.136683	0.436	0.376	0.153846
Rac1	0.0893766	0.117637	0.947	0.94	0.153846
Acat1	0.0893841	-0.113407	0.835	0.759	0.153846
Cox10	0.0894885	0.1425	0.511	0.459	0.153851
Srp19	0.0895292	0.118281	0.97	0.955	0.153851
Ltv1	0.089555	0.123899	0.774	0.684	0.153851
Tmem98	0.0896214	0.12148	0.602	0.534	0.153869
Aff4	0.0898452	-0.124258	0.684	0.669	0.154071
Minpp1	0.0898515	0.134947	0.782	0.729	0.154071
Srpk1	0.0900208	0.138305	0.947	0.895	0.154193
Nolc1	0.0900348	0.142771	0.91	0.85	0.154193
Snx27	0.0902347	0.131878	0.549	0.398	0.154254
Proser1	0.0902373	0.140066	0.647	0.594	0.154254
Tox3	0.0902386	0.139197	0.692	0.662	0.154254
Emc3	0.0904535	0.127059	0.692	0.684	0.154336
Mfap3	0.0904665	0.122776	0.556	0.406	0.154336
Polr3e	0.090621	0.144891	0.406	0.301	0.154336
Hnrnph1	0.0906414	0.135186	0.962	0.985	0.154336
Atad3a	0.0906595	0.125003	0.797	0.699	0.154336
Haus3	0.0906633	0.129954	0.602	0.549	0.154336
Appl2	0.09068	-0.127339	0.195	0.301	0.154336
Eif3a	0.0908046	0.136995	1	1	0.154452
Mcfd2	0.0916616	0.124247	0.647	0.511	0.155682
Wdr61	0.0917556	0.127833	0.925	0.887	0.155682
Heatr1	0.0917618	0.16093	0.406	0.301	0.155682
Nosip	0.0918255	0.140582	0.466	0.398	0.155682
Zfp1	0.0918521	0.128381	0.519	0.361	0.155682
Kpna2	0.0919233	0.243622	0.556	0.444	0.155682
Brd4	0.091929	0.135652	0.902	0.82	0.155682
Mpv17l2	0.0919809	0.131769	0.526	0.361	0.155682
Sdc1	0.0925162	0.141079	0.722	0.647	0.156491
Hs3st3b1	0.0927125	-0.131153	0.729	0.729	0.156727
Prelid2	0.0930206	-0.12189	0.489	0.444	0.157151
Siva1	0.0932763	0.100854	1	1	0.157422
Sh3bgrl3	0.0932954	0.117145	0.925	0.865	0.157422
Cggbp1	0.093359	0.127833	0.94	0.895	0.157432
Polr1d	0.0936182	0.100379	0.992	0.985	0.157695
Pax2	0.0936298	0.18248	0.94	0.91	0.157695
Utp4	0.0937286	0.123986	0.586	0.481	0.157745
Nipa2	0.0939077	0.130136	0.722	0.571	0.157745
Slc25a39	0.0939136	0.125613	0.91	0.85	0.157745
Taf12	0.0939587	0.124343	0.722	0.624	0.157745
Adgrl1	0.0939852	0.126752	0.714	0.624	0.157745
Zdhhc2	0.0940036	0.126382	0.421	0.293	0.157745
Sdhb	0.0941233	0.103629	0.962	0.992	0.157849
Clpp	0.0943564	0.116433	0.895	0.797	0.158063
Peg3	0.0944195	-0.125061	0.752	0.759	0.158063
Zfp266	0.0944234	0.139336	0.857	0.812	0.158063
Dusp12	0.0946094	0.128934	0.549	0.474	0.158278
Itgb1bp1	0.0948307	-0.108322	0.496	0.556	0.158551
Xndc1	0.0949645	0.144581	0.406	0.278	0.158632
Pmm1	0.0950273	0.13062	0.639	0.549	0.158632
Uimc1	0.0950522	0.14564	0.519	0.519	0.158632
Scamp3	0.0951176	0.122854	0.744	0.609	0.158645
Xrn2	0.0953741	0.124235	0.955	0.94	0.158976
Igfbp7	0.095452	-0.21327	0.887	0.865	0.15901
Thoc3	0.0959117	0.114461	0.94	0.812	0.159621
Mrpl58	0.0959354	0.12536	0.902	0.902	0.159621
C1qbp	0.0963583	0.100492	0.962	0.992	0.160228
Eml2	0.0965099	-0.104261	0.278	0.368	0.160383
Gde1	0.0967128	0.124399	0.872	0.744	0.160623
Ntm	0.0970343	-0.19628	0.135	0.211	0.161047
Rrp9	0.0970852	0.128795	0.684	0.654	0.161047
Adpgk	0.0972358	0.14049	0.383	0.286	0.161199
Ing1	0.0973478	0.129331	0.91	0.812	0.161227
Hmgcs1	0.097394	0.146806	0.774	0.699	0.161227
Impa2	0.0974526	0.127663	0.549	0.436	0.161227
Rdh11	0.0974877	0.136336	0.398	0.256	0.161227
Zfp105	0.0977626	0.131576	0.459	0.338	0.161585
Mrps25	0.09794	0.124659	0.88	0.789	0.161778
E2f1	0.0979973	0.127833	0.564	0.496	0.161778
Dapk1	0.0982368	-0.13062	0.376	0.398	0.162076
Acad9	0.0983891	0.13847	0.451	0.353	0.16215
Vars	0.098467	0.127499	0.895	0.857	0.16215
Lrrc47	0.0985074	0.131336	0.579	0.466	0.16215
Bcam	0.0985178	0.144739	0.925	0.857	0.16215
Slc30a7	0.0986234	-0.139762	0.173	0.278	0.162162
Med28	0.0986433	0.124454	0.94	0.925	0.162162
Me2	0.0987621	0.120144	0.707	0.586	0.16226
Uap1l1	0.0989442	-0.148641	0.158	0.278	0.16246
Smad5	0.099002	0.137096	0.564	0.481	0.16246
Ttc27	0.0991968	0.127624	0.436	0.308	0.16264
Poglut1	0.0992302	0.128211	0.534	0.429	0.16264
Neu1	0.0993615	-0.139529	0.308	0.316	0.162686
Nob1	0.0993766	0.125557	0.714	0.647	0.162686
Tnks2	0.0995071	0.137134	0.797	0.729	0.162803
Terf2ip	0.0996516	0.126441	0.571	0.444	0.162942
Cyb561d2	0.0997349	0.122218	0.519	0.383	0.162981
Sumo3	0.100046	0.145383	0.947	0.94	0.163393
Slc4a2	0.100162	0.128254	0.451	0.271	0.16347
Bcs1l	0.100212	0.137784	0.398	0.293	0.16347
Pold3	0.100341	0.141478	0.737	0.699	0.163583
5730480H06Rik	0.100527	0.137471	0.398	0.361	0.163709
Ecd	0.100547	0.129105	0.647	0.632	0.163709
Ppp4r3a	0.100662	0.131734	0.789	0.707	0.163709
Psmg3	0.100665	0.128343	0.722	0.639	0.163709
Gtf2h1	0.100717	0.127646	0.519	0.398	0.163709
Ddx49	0.101099	0.121823	0.669	0.519	0.163952
Smpd4	0.10113	0.13708	0.481	0.406	0.163952
Eif2ak2	0.10118	0.127833	0.444	0.323	0.163952
Spsb3	0.101187	0.132873	0.451	0.316	0.163952
Ptrh2	0.101209	0.130496	0.729	0.639	0.163952
Ercc1	0.101224	0.128795	0.662	0.602	0.163952
Mto1	0.101326	0.130053	0.421	0.286	0.164021
Svbp	0.101742	0.117988	0.887	0.932	0.164597
Zfp593	0.101844	0.134453	0.617	0.571	0.164639
Elac2	0.101891	0.124893	0.549	0.421	0.164639
Ddah2	0.101948	0.111051	1	0.992	0.164639
Kctd2	0.102144	0.12723	0.466	0.414	0.164738
Ripk3	0.102172	0.167538	0.323	0.165	0.164738
Slc39a6	0.102242	0.131097	0.617	0.586	0.164738
Atg101	0.102278	0.130496	0.782	0.714	0.164738
Eif3g	0.102344	0.104179	0.97	0.977	0.164738
Sh3bp4	0.102369	-0.109465	0.699	0.782	0.164738
Lsm14a	0.102512	0.124368	0.82	0.789	0.164871
Zfp61	0.103206	-0.127155	0.278	0.346	0.165879
Pqbp1	0.103259	0.131628	0.662	0.534	0.165879
Chka	0.103527	0.129678	0.669	0.617	0.166213
Elovl5	0.103776	0.149212	0.361	0.271	0.166515
Myg1	0.104027	0.121361	0.857	0.797	0.16682
Dus4l	0.104185	-0.118448	0.203	0.338	0.166823
Zbtb7c	0.104272	-0.145366	0.564	0.586	0.166823
Dbi	0.104308	0.102617	1	0.992	0.166823
Calm2	0.104352	0.128282	1	1	0.166823
Tmem176a	0.104361	-0.154976	0.669	0.692	0.166823
Dscc1	0.104393	0.13942	0.617	0.489	0.166823
Hira	0.10477	0.138432	0.504	0.391	0.167258
Casd1	0.104843	0.124873	0.466	0.338	0.167258
Rnf219	0.104895	0.129631	0.677	0.602	0.167258
Supt4a	0.104909	0.121403	0.925	0.917	0.167258
Hist1h1d	0.105126	0.155622	0.639	0.534	0.167353
Pum3	0.105139	0.136988	0.789	0.737	0.167353
Plcb4	0.105152	0.144581	0.459	0.436	0.167353
Ammecr1l	0.105646	0.123298	0.571	0.414	0.167982
Mettl2	0.105713	0.12696	0.496	0.429	0.167982
Afg3l1	0.105759	0.119904	0.714	0.654	0.167982
Naa10	0.105791	0.118212	0.917	0.895	0.167982
Mdn1	0.105957	0.183065	0.481	0.376	0.168147
Prpf38a	0.106053	0.118309	0.857	0.82	0.168181
Lnpk	0.106123	0.132458	0.571	0.421	0.168181
Tapt1	0.106162	0.194156	0.286	0.143	0.168181
Pfdn2	0.106381	0.105261	0.985	0.977	0.168432
Tor2a	0.106532	0.125557	0.729	0.632	0.168574
Smox	0.106681	0.157963	0.376	0.278	0.168713
Snap91	0.106883	-0.203165	0.173	0.293	0.16883
Ngdn	0.106939	0.121994	0.744	0.669	0.16883
Acp1	0.106944	0.120352	0.955	0.985	0.16883
Traf4	0.107002	0.107145	0.699	0.662	0.16883
Gsr	0.107072	0.138937	0.805	0.744	0.168844
Ppwd1	0.107188	0.147523	0.782	0.662	0.168931
Traip	0.107677	0.135545	0.391	0.308	0.169604
Rpp21	0.107885	0.133929	0.752	0.669	0.169787
Pithd1	0.107917	0.126867	0.496	0.398	0.169787
Lrrc58	0.108126	0.13062	0.759	0.699	0.169931
Tceal3	0.108133	-0.102654	0.406	0.406	0.169931
Ankrd11	0.108223	0.142996	0.985	0.97	0.169977
Ly6a	0.108378	-0.241606	0.18	0.241	0.170123
Mrps22	0.108491	0.123379	0.692	0.684	0.17014
Gna12	0.108555	0.138402	0.602	0.549	0.17014
Psmd13	0.108575	0.114684	0.947	0.97	0.17014
Tubb6	0.108835	0.13708	0.504	0.308	0.17045
Pltp	0.10894	-0.117783	0.331	0.391	0.170517
Nktr	0.10917	0.129411	0.895	0.827	0.170736
Slc38a10	0.109204	0.12738	0.579	0.564	0.170736
Tubgcp3	0.109679	0.125688	0.564	0.459	0.171381
Pcmt1	0.109919	0.123298	0.85	0.797	0.171659
Slc35b2	0.110004	0.117783	0.707	0.677	0.171694
Fam160a2	0.11028	0.139762	0.391	0.271	0.172026
Zyg11b	0.110408	0.149676	0.383	0.323	0.172129
Edf1	0.110526	0.104427	0.992	0.992	0.172215
Rpgrip1	0.110639	0.127624	0.459	0.346	0.172293
Dcp2	0.110707	0.122316	0.639	0.526	0.172302
Cbl	0.11094	0.132519	0.549	0.459	0.172566
Ywhae	0.111193	0.113559	1	1	0.172862
Ppp2r5e	0.111577	0.132237	0.699	0.647	0.173361
Ssna1	0.111875	0.115196	0.925	0.835	0.1737
Pinx1	0.111956	0.134851	0.654	0.602	0.1737
Armcx5	0.111985	0.154976	0.353	0.263	0.1737
Mllt3	0.112502	-0.101096	0.308	0.338	0.174404
Tfg	0.112752	0.118438	0.91	0.895	0.17468
Klhl23	0.112808	0.132222	0.444	0.323	0.17468
Cdc37l1	0.113135	0.128121	0.624	0.579	0.175088
Tmem33	0.11347	0.111226	0.744	0.609	0.175508
Rtca	0.113812	0.130551	0.699	0.639	0.175886
Miga1	0.113842	0.137621	0.391	0.293	0.175886
Tomm5	0.113974	0.134733	0.977	0.925	0.175898
Haus4	0.113978	0.120144	0.692	0.654	0.175898
Exosc10	0.114405	0.129432	0.632	0.541	0.176369
Top1	0.114412	0.115939	1	1	0.176369
Mapk6	0.114542	0.125163	0.571	0.429	0.176434
Akt3	0.114583	-0.105361	0.226	0.316	0.176434
2700062C07Rik	0.114867	0.125927	0.534	0.451	0.176774
Tmem245	0.115089	0.117337	0.526	0.526	0.177015
Spsb2	0.115324	-0.200671	0.135	0.241	0.177277
Gpatch4	0.115711	0.118716	0.722	0.669	0.177774
Gtf3a	0.115829	0.111226	0.917	0.85	0.177817
Polr1a	0.115869	0.137312	0.511	0.481	0.177817
Cenpq	0.116252	0.126195	0.812	0.647	0.178306
Zfp317	0.11645	-0.119801	0.203	0.323	0.178509
Yars	0.116771	0.114728	0.632	0.556	0.17883
Sparcl1	0.11679	0.176624	0.331	0.241	0.17883
Adamts1	0.116937	-0.156054	0.323	0.376	0.178955
Thap12	0.117033	0.118808	0.737	0.699	0.179003
Emc7	0.117227	0.11876	0.774	0.774	0.1792
1110008P14Rik	0.11734	0.123298	0.541	0.376	0.179273
Fbxo5	0.117533	0.143351	0.767	0.707	0.179468
Spen	0.117614	0.142636	0.654	0.549	0.179491
Plpp2	0.117736	0.121805	0.474	0.293	0.179579
Tmbim4	0.117824	0.119089	0.767	0.722	0.179614
Wdr26	0.117948	0.128175	0.827	0.835	0.179702
Ikbkb	0.118491	0.123345	0.639	0.549	0.18043
Rsl24d1	0.118788	0.126208	0.827	0.789	0.180782
Arid4b	0.119182	0.133164	0.94	0.94	0.181192
Usp15	0.119203	0.122734	0.744	0.654	0.181192
1110065P20Rik	0.119256	0.119851	0.797	0.692	0.181192
Ntf3	0.119334	-0.124911	0.421	0.474	0.18121
Ndrg1	0.119474	-0.116588	0.293	0.353	0.181324
Gpcpd1	0.119552	-0.119623	0.308	0.316	0.181341
Phf13	0.12016	0.123727	0.474	0.353	0.182164
Arl1	0.120305	0.114675	0.97	0.962	0.182282
Ctgf	0.120775	-0.34046	0.075	0.135	0.182791
Tm6sf1	0.120791	-0.109353	0.737	0.805	0.182791
Wdr75	0.120872	0.125163	0.654	0.609	0.182791
Rbm14	0.120926	0.114978	0.602	0.481	0.182791
Dab2	0.121022	-0.10488	0.323	0.421	0.182791
Golph3	0.12104	0.118193	0.639	0.571	0.182791
Emc10	0.121258	0.109034	0.962	0.85	0.183019
Prmt7	0.121396	0.119089	0.782	0.737	0.183128
2700033N17Rik	0.121472	-0.179152	0.15	0.263	0.183141
Xrcc6	0.12173	0.115155	0.632	0.541	0.183429
Tbrg1	0.121809	0.11814	0.925	0.925	0.183448
St5	0.122359	-0.12189	0.188	0.286	0.183982
Pfn2	0.122393	0.147027	0.797	0.579	0.183982
Ftsj3	0.12249	0.123116	0.744	0.707	0.183982
Nr2c1	0.122503	0.169076	0.316	0.128	0.183982
Nop16	0.12251	0.121361	0.714	0.654	0.183982
Rae1	0.122565	0.116577	0.917	0.85	0.183982
Cenpx	0.122799	0.112222	0.895	0.887	0.184147
Ninj1	0.122936	0.12189	0.466	0.414	0.184147
Polr2g	0.122996	0.109415	0.947	0.947	0.184147
Appl1	0.123028	0.122137	0.774	0.684	0.184147
Napa	0.123033	0.109815	0.887	0.805	0.184147
Ncapd2	0.123077	0.14842	0.722	0.602	0.184147
BC003965	0.123155	0.138784	0.737	0.699	0.184162
Fkbp2	0.12331	0.111467	0.932	0.902	0.184294
Cspg4	0.123472	-0.102129	0.271	0.353	0.184436
Zfr	0.123542	0.142563	0.707	0.737	0.184439
Dgat1	0.123609	0.131336	0.406	0.226	0.184439
Tubgcp5	0.123785	0.118861	0.474	0.406	0.184602
Exosc5	0.123956	0.134495	0.782	0.699	0.184705
Ube2i	0.123989	0.113469	0.992	0.992	0.184705
Rnf7	0.124219	0.108297	0.97	0.985	0.184949
Trafd1	0.124487	0.13084	0.421	0.301	0.185205
Alkbh6	0.124608	0.118264	0.541	0.451	0.185205
Jade1	0.12466	0.15924	0.684	0.632	0.185205
Hexim1	0.124661	-0.102339	0.436	0.489	0.185205
Ddx20	0.124791	0.143788	0.391	0.376	0.185297
Snf8	0.125589	0.11641	0.887	0.85	0.186305
Ano10	0.125605	-0.103072	0.241	0.346	0.186305
Ptcd3	0.12575	0.121144	0.617	0.624	0.18642
Chordc1	0.125931	0.127398	0.805	0.805	0.186587
Ahsa2	0.126049	0.113455	0.707	0.579	0.186641
Mmp11	0.126306	0.127155	0.541	0.489	0.186641
Rab7	0.126315	0.126812	0.85	0.789	0.186641
Ddx56	0.126329	0.126836	0.654	0.541	0.186641
Txnip	0.126362	0.140728	0.459	0.383	0.186641
Tubb4b	0.126375	0.150814	0.992	0.962	0.186641
Telo2	0.126471	0.118686	0.579	0.504	0.186683
Med22	0.126758	0.11723	0.496	0.338	0.187002
Camk2n2	0.126824	0.161913	0.316	0.195	0.187002
Cxxc1	0.127117	0.119926	0.624	0.579	0.187334
Dock4	0.127229	-0.110111	0.293	0.361	0.187398
Dnajb1	0.12745	0.110077	0.677	0.541	0.187542
Gmnn	0.127463	0.125383	0.955	0.895	0.187542
Pcgf1	0.127706	-0.100644	0.218	0.323	0.187799
Syt7	0.127894	-0.108803	0.211	0.286	0.187975
Shisa5	0.128538	0.151726	0.346	0.241	0.188816
Clspn	0.128604	0.150527	0.789	0.782	0.188816
Slc48a1	0.128802	-0.1039	0.541	0.594	0.189006
Ppp3cb	0.129039	0.12033	0.714	0.669	0.189177
Gtf2h5	0.129056	0.108214	0.992	0.97	0.189177
Ctr9	0.129913	0.124258	0.707	0.654	0.190259
Mapk8ip3	0.129933	-0.104261	0.271	0.346	0.190259
G6pdx	0.130006	0.124823	0.383	0.241	0.190265
Siah1b	0.130082	0.118365	0.459	0.323	0.190275
Pak4	0.130265	0.116668	0.714	0.594	0.190354
Pak1ip1	0.130275	0.119769	0.887	0.857	0.190354
Clasp1	0.13038	0.11084	0.669	0.534	0.190406
Ammecr1	0.130674	0.136132	0.519	0.466	0.190659
Dnajb4	0.130692	-0.103867	0.361	0.406	0.190659
Hgsnat	0.130772	-0.201285	0.105	0.233	0.190674
Ankrd49	0.130879	0.115513	0.684	0.534	0.190712
Arl16	0.130971	0.128712	0.398	0.278	0.190712
Fdft1	0.131073	0.11626	0.647	0.549	0.190712
Nras	0.131076	0.100323	0.835	0.714	0.190712
Morf4l1	0.131244	0.110747	1	1	0.190857
Isg20l2	0.13151	0.121645	0.459	0.361	0.191142
Apex1	0.131714	0.11614	0.977	0.977	0.191337
Bud23	0.132272	0.116921	0.797	0.774	0.192046
Timm8a1	0.132974	0.119869	0.88	0.759	0.192963
Elk3	0.133197	-0.120489	0.195	0.293	0.193184
Emg1	0.133267	0.101902	0.977	0.947	0.193184
Rab6a	0.133533	0.11296	0.865	0.797	0.193468
Marcks	0.133607	0.108093	0.992	0.977	0.193473
Cntfr	0.133977	0.11173	0.677	0.571	0.193847
Mtif2	0.134071	0.119545	0.556	0.496	0.193847
Yipf5	0.134126	0.122709	0.744	0.759	0.193847
Rnf38	0.134148	0.129534	0.436	0.301	0.193847
Map2k4	0.13429	0.112569	0.541	0.474	0.193943
Ngfr	0.134355	0.216896	0.594	0.451	0.193943
Ubb	0.134699	0.114647	1	1	0.194337
Dgcr6	0.135054	0.106794	0.91	0.85	0.19471
Ap1g1	0.135099	0.138586	0.504	0.436	0.19471
Tti2	0.135669	-0.10962	0.18	0.301	0.195429
Ppan	0.13584	0.116072	0.812	0.744	0.195519
Vps13b	0.135874	0.128211	0.459	0.361	0.195519
Anapc16	0.13603	0.117783	0.774	0.729	0.195605
Cbfb	0.136076	0.108214	0.647	0.489	0.195605
Pknox1	0.136245	0.128381	0.511	0.429	0.195701
Mpzl1	0.136348	0.122239	0.842	0.812	0.195701
Zfp606	0.136356	0.136576	0.444	0.376	0.195701
Dcdc2a	0.136578	-0.263912	0.09	0.203	0.195888
Stk11	0.13663	0.11641	0.759	0.707	0.195888
Lsm5	0.136921	0.103817	0.947	0.932	0.196126
Txnrd1	0.136938	0.109123	0.82	0.827	0.196126
Cpsf6	0.137119	0.128239	0.932	0.917	0.196282
Adnp	0.137339	0.128052	0.406	0.308	0.196495
Max	0.137443	0.112702	0.677	0.556	0.196542
Klc2	0.137523	0.125163	0.398	0.286	0.196547
Etfrf1	0.13759	-0.120364	0.226	0.316	0.196547
Aurka	0.137665	0.219902	0.564	0.444	0.196552
Ppih	0.13775	0.112689	0.947	0.88	0.196572
Ap2a1	0.137927	0.114305	0.586	0.526	0.196721
Exosc8	0.138504	0.108255	0.962	0.895	0.197441
Slc25a33	0.138695	0.111226	0.556	0.436	0.197538
Ccdc22	0.138741	0.110281	0.571	0.466	0.197538
Pacsin2	0.138787	0.110001	0.534	0.391	0.197538
2310033P09Rik	0.138972	0.113206	0.692	0.579	0.197699
Nup155	0.139078	0.106711	0.579	0.383	0.197725
Epn3	0.139135	-0.158368	0.188	0.263	0.197725
Snrpc	0.139566	0.101469	0.955	0.955	0.198236
Map7d1	0.139673	0.118986	0.624	0.549	0.198238
Tardbp	0.139751	0.113807	0.962	0.925	0.198238
Hsdl1	0.139784	0.109019	0.459	0.301	0.198238
Csad	0.139872	0.110281	0.511	0.391	0.19826
4930453N24Rik	0.140072	0.113206	0.707	0.654	0.198441
Cog8	0.140262	0.107383	0.602	0.496	0.198532
Banp	0.140313	0.113195	0.602	0.541	0.198532
Eif3b	0.140353	0.145356	0.925	0.88	0.198532
Gstm2	0.140789	0.124298	0.421	0.323	0.199046
Cenpp	0.141125	0.112841	0.669	0.632	0.199419
Taf5	0.141343	0.107169	0.534	0.436	0.199527
Pmvk	0.141377	0.111536	0.752	0.639	0.199527
Cep295	0.141443	0.137471	0.669	0.564	0.199527
Ifrd2	0.141492	0.11164	0.654	0.519	0.199527
Pigf	0.141663	0.106523	0.586	0.556	0.199665
Zc3h13	0.141904	0.138305	0.925	0.94	0.199902
Dexi	0.142125	0.118281	0.519	0.489	0.200112
Gldc	0.14224	0.15155	0.338	0.195	0.20017
Vapb	0.142452	0.114776	0.707	0.639	0.200366
P4hb	0.142771	0.112293	0.932	0.925	0.200712
Ppp2r1a	0.143102	0.105159	0.895	0.774	0.201075
Uhrf1	0.143237	0.148923	0.887	0.85	0.201155
Ubap2l	0.143305	0.115466	0.947	0.947	0.201155
Rtn3	0.143518	0.107377	0.947	0.947	0.201263
Rfk	0.143593	0.110281	0.586	0.414	0.201263
Cstf2	0.143602	0.110785	0.579	0.549	0.201263
Smg9	0.143698	0.143101	0.346	0.226	0.201295
Epc1	0.143781	0.149096	0.556	0.519	0.201307
Exosc3	0.144009	0.109353	0.895	0.857	0.201525
Ppp2r5d	0.144122	0.121466	0.654	0.639	0.201543
Amacr	0.144169	-0.113759	0.218	0.301	0.201543
Ppp1r15b	0.144329	0.123233	0.406	0.308	0.201619
Mrps17	0.14437	0.104985	0.902	0.82	0.201619
Aff1	0.14453	-0.115736	0.173	0.293	0.201739
Smarcd1	0.145076	0.114849	0.895	0.865	0.202399
Elp3	0.14523	0.108518	0.602	0.526	0.202511
Nom1	0.145491	0.113574	0.714	0.647	0.202765
Slc38a2	0.14556	0.10701	0.977	0.977	0.202765
Atpaf2	0.145834	0.11723	0.421	0.376	0.203044
Sgta	0.146079	0.108358	0.91	0.872	0.203282
Clcc1	0.146307	0.107542	0.466	0.496	0.203496
Ift140	0.146531	-0.148641	0.143	0.263	0.203704
Fblim1	0.146644	0.132172	0.383	0.256	0.203759
Ccnk	0.146775	0.118749	0.504	0.474	0.203838
H3f3b	0.146855	0.116331	1	1	0.203845
Selenbp1	0.146946	-0.183337	0.203	0.218	0.203869
Rfc5	0.147228	0.107938	0.895	0.812	0.204157
Synj2bp	0.147454	0.111403	0.737	0.692	0.204367
Caml	0.147592	0.107486	0.737	0.594	0.204456
B930036N10Rik	0.147756	0.163955	0.248	0.195	0.204504
Xpo6	0.147776	0.109751	0.609	0.526	0.204504
Naa25	0.147903	0.125434	0.474	0.398	0.204577
Uchl5	0.148024	0.11723	0.865	0.835	0.204603
Ier2	0.148071	-0.134747	0.895	0.925	0.204603
Hbs1l	0.148339	0.115279	0.707	0.737	0.20487
Arl5a	0.148419	0.109457	0.669	0.564	0.204878
Prss23	0.148804	0.146093	0.504	0.414	0.205251
Fancm	0.148867	0.130417	0.398	0.376	0.205251
Fbrsl1	0.148913	0.114542	0.451	0.353	0.205251
Mid1ip1	0.149035	0.122602	0.391	0.271	0.205308
Psph	0.149104	-0.102084	0.361	0.444	0.205308
Mtrf1l	0.149329	0.113143	0.429	0.361	0.205514
Nup35	0.149676	0.117783	0.511	0.444	0.205889
Ap1m1	0.149754	0.126836	0.624	0.556	0.205893
Tsix	0.150058	-0.127597	0.173	0.286	0.206207
[truncated: 759 more rows]

## Sheet: Tub_progenitors4.MutVsCTRL.DEGs
Gene	p_val	avg_logFC	pct.1	pct.2	p_val_adj
Cxcl10	NA	-2.05012	0.051	0.101	NA
Chga	NA	-1.64672	0.051	0.338	NA
S100a6	NA	-1.64334	0.215	0.372	NA
Vim	NA	-1.29829	0.759	0.791	NA
Hspb1	NA	-1.11982	0.203	0.297	NA
Mme	7.69e-17	-1.01754	0.241	0.655	3.52e-14
Ttc36	4.15e-05	-0.918546	0.266	0.561	0.00109047
Sult1d1	NA	-0.89759	0.139	0.277	NA
Tmem176a	1.37e-15	-0.875023	0.848	0.919	5.75e-13
Mt1	NA	-0.834149	0.709	0.635	NA
Calml4	1.21e-05	-0.815067	0.595	0.716	0.000410573
Cryab	NA	-0.743416	0.139	0.216	NA
Sostdc1	0.00153452	-0.719309	0.304	0.473	0.0160758
Nceh1	1.92e-13	-0.710674	0.304	0.595	5.69e-11
Tmem176b	4.91e-13	-0.702755	0.949	0.993	1.3e-10
Ggt1	3.32e-06	-0.697071	0.62	0.709	0.000139221
Hbegf	NA	-0.644736	0.089	0.162	NA
Fbp1	NA	-0.581016	0.051	0.209	NA
Junb	1.92e-05	-0.559459	0.608	0.703	0.000594818
Vcam1	2.75e-06	-0.554454	0.62	0.662	0.000122861
Aspa	0.000121137	-0.550097	0.165	0.345	0.00251197
Plscr2	1.36e-05	-0.542858	0.354	0.486	0.000446759
Bdh2	5.09e-07	-0.523745	0.481	0.601	3.56e-05
Cyp4a31	0.000505548	-0.521279	0.177	0.385	0.00735352
Tagln	NA	-0.516854	0.278	0.264	NA
Cldn1	0.000181854	-0.514691	0.304	0.311	0.00332015
Aadat	NA	-0.493384	0.228	0.385	NA
Rida	1.98e-05	-0.479458	0.823	0.939	0.000605635
Cdkn1a	0.000561217	-0.479432	0.228	0.365	0.00796612
Prss12	4.38e-05	-0.470848	0.215	0.365	0.00113177
Apln	1.48e-07	-0.467441	0.165	0.459	1.22e-05
Bnip3	1.18e-07	-0.458237	0.418	0.635	1.01e-05
Gm13855	8.62e-06	-0.456407	0.127	0.372	0.000308177
Spp2	NA	-0.453516	0.139	0.243	NA
Mcmdc2	1.41e-06	-0.446033	0.354	0.601	7.38e-05
Rras	4.45e-06	-0.444037	0.329	0.507	0.000175086
Cpn1	2.74e-06	-0.441172	0.759	0.851	0.000122861
Fosb	0.000237982	-0.441106	0.443	0.568	0.00403767
Npnt	2.75e-07	-0.439852	0.734	0.919	2.11e-05
Irx1	0.0202643	-0.439281	0.063	0.257	0.0997185
Thnsl2	8.74e-05	-0.438223	0.342	0.541	0.00198282
Mafb	0.0208393	-0.435979	0.228	0.216	0.101655
Malat1	1.8e-11	-0.432945	1	1	3.94e-09
Rbm47	1.53e-06	-0.430497	0.582	0.669	7.95e-05
Neu1	1.06e-06	-0.426885	0.544	0.628	5.94e-05
Alad	4.94e-15	-0.423902	0.861	0.966	1.78e-12
H2-Ab1	4.24e-07	-0.413295	0.405	0.689	3.1e-05
Selenbp1	0.00018006	-0.410223	0.544	0.628	0.00331139
Igfbp7	9.24e-09	-0.405843	1	1	1.11e-06
Gpc4	4.35e-06	-0.404926	0.608	0.757	0.00017267
Gk	3.03e-05	-0.402422	0.342	0.547	0.000834288
B3gat2	0.000325243	-0.401255	0.266	0.48	0.00518639
Gipc2	0.00500449	-0.399458	0.367	0.568	0.0368191
Fabp4	NA	-0.398352	0.519	0.486	NA
Hdc	NA	-0.395855	0.405	0.277	NA
Mpc2	4.12e-11	-0.391034	0.987	1	8.31e-09
Rpl29	4.27e-73	-0.387919	1	1	2.15e-69
1700011H14Rik	1.62e-05	-0.385326	0.709	0.838	0.000523919
Gpx3	NA	-0.381331	0.228	0.358	NA
Tmem174	0.00867004	-0.379733	0.152	0.291	0.0530843
Slc39a8	5.05e-05	-0.379392	0.532	0.588	0.00125775
H2-K1	2.93e-05	-0.375	0.367	0.507	0.000811539
Napsa	NA	-0.372503	0.367	0.345	NA
Glud1	9.69e-07	-0.372074	0.937	0.959	5.61e-05
Tmem25	0.0125458	-0.369495	0.051	0.243	0.0705883
Tcea3	0.00448056	-0.368457	0.342	0.466	0.0343646
D030045P18Rik	0.000120564	-0.368038	0.241	0.446	0.00251197
Pccb	4.62e-08	-0.365487	0.418	0.608	4.85e-06
Tpmt	2.71e-06	-0.361993	0.633	0.757	0.000122861
H2-D1	1.98e-05	-0.361475	0.468	0.588	0.000605635
Nat8f1	0.00346661	-0.360391	0.228	0.297	0.0286835
Ephx2	1.81e-05	-0.359985	0.241	0.453	0.000568882
Spsb2	6.44e-05	-0.359422	0.203	0.385	0.00154459
Abhd14a	2.74e-08	-0.35879	0.81	0.878	2.93e-06
Hnf1aos1	0.000714214	-0.357366	0.101	0.318	0.00952097
Gm13305	2.12e-06	-0.356963	0.152	0.432	9.99e-05
Misp	0.000834221	-0.356531	0.253	0.365	0.0104829
Hspa2	0.000648166	-0.351789	0.203	0.338	0.00880353
Akap12	0.00755508	-0.34655	0.494	0.426	0.0477667
Exoc6	2.45e-07	-0.342271	0.532	0.73	1.93e-05
Dapk1	5.57e-07	-0.341892	0.443	0.628	3.79e-05
Ubc	4.39e-13	-0.341791	1	0.98	1.23e-10
Pou3f3	0.000410915	-0.340351	0.468	0.574	0.00621802
Gadd45b	0.00376012	-0.339656	0.266	0.365	0.0302163
Hist1h2bc	0.000168918	-0.339437	0.468	0.595	0.00321198
Acaa1b	0.0028183	-0.339219	0.165	0.311	0.0249585
Fam107b	1.26e-06	-0.335837	0.582	0.696	6.76e-05
Vkorc1	5.46e-08	-0.334807	0.519	0.716	5.19e-06
Gclm	3.75e-06	-0.331772	0.759	0.858	0.000155056
Camk2n1	2.76e-06	-0.331346	0.785	0.831	0.000122861
Gsta4	2.76e-07	-0.32995	0.772	0.851	2.11e-05
Gm19950	0.0271625	-0.327747	0.304	0.338	0.123168
Klf4	0.00131443	-0.324602	0.203	0.345	0.0144301
Steap1	0.000116171	-0.324244	0.506	0.642	0.00245959
Pla2g16	0.000450749	-0.322894	0.456	0.595	0.00671989
Foxd1	0.0286347	-0.321812	0.127	0.189	0.12724
Acadm	0.000781512	-0.321074	0.747	0.804	0.010046
Bhlhe40	0.003015	-0.318986	0.177	0.311	0.0261941
Anxa2	0.00643807	-0.318462	0.646	0.635	0.0433698
Slc6a18	0.0602696	-0.317374	0.038	0.176	0.210638
Cpm	NA	-0.3161	0.127	0.176	NA
Pdgfb	NA	-0.315434	0.089	0.162	NA
Gm10036	2.41e-08	-0.3153	0.722	0.797	2.64e-06
Ass1	0.0360177	-0.314599	0.19	0.25	0.149994
Lactb2	2.54e-05	-0.314149	0.405	0.568	0.000751037
Fabp3	0.0304632	-0.312243	0.152	0.236	0.133366
Macrod1	4.14e-05	-0.310505	0.203	0.405	0.00109047
Hif3a	0.00119928	-0.305768	0.139	0.318	0.0135497
4931406C07Rik	0.000170749	-0.305437	0.456	0.527	0.00322249
Anxa4	4.9e-06	-0.304905	0.304	0.52	0.000189935
AY036118	0.000297443	-0.301928	0.949	0.953	0.00483916
Etnk1	2.91e-05	-0.300949	0.684	0.723	0.000811294
Adamts16	1.16e-05	-0.299426	0.456	0.662	0.000394846
Sephs2	8.88e-07	-0.298075	0.823	0.878	5.2e-05
Eef2kmt	6.43e-07	-0.293452	0.595	0.709	4.21e-05
Ch25h	0.035949	-0.293061	0.089	0.209	0.149832
Mpv17l	NA	-0.292865	0.139	0.142	NA
Trim7	0.0178478	-0.292773	0.139	0.257	0.0909351
Cd63	7.32e-09	-0.292649	1	1	9.46e-07
Samd9l	0.0024414	-0.290466	0.19	0.351	0.0222866
Dcdc2a	7.32e-06	-0.289868	0.81	0.932	0.00026728
Psph	4.83e-07	-0.289423	0.696	0.811	3.43e-05
Kif12	3.45e-05	-0.287848	0.835	0.892	0.000940122
Ctsh	0.00344146	-0.283791	0.291	0.419	0.0285223
Paqr5	0.00165543	-0.283636	0.329	0.453	0.0169892
Itga1	0.000863361	-0.281227	0.684	0.689	0.0107155
Timp3	NA	-0.278824	0.392	0.466	NA
F3	0.0128114	-0.278164	0.165	0.23	0.0716501
Cebpd	0.0643556	-0.275678	0.177	0.182	0.219856
Aldh1b1	0.000387517	-0.273358	0.177	0.365	0.00595335
Tmem106b	1.65e-05	-0.270827	0.291	0.561	0.000529921
Zfp697	0.000461386	-0.268324	0.456	0.588	0.00685819
Fos	0.0105893	-0.267044	0.608	0.655	0.062046
St8sia2	0.00268591	-0.266053	0.203	0.324	0.0239969
Prr15l	0.0010269	-0.265658	0.354	0.419	0.0122041
Gm45792	0.0217717	-0.264429	0.304	0.399	0.105084
Slc39a5	0.127784	-0.264234	0.354	0.466	0.345999
Xist	0.239255	-0.263286	0.354	0.547	0.498802
Foxc1	0.00111121	-0.263019	0.316	0.453	0.0129019
Retreg1	2.65e-05	-0.262894	0.797	0.872	0.000772677
Acadvl	2.62e-05	-0.262336	0.557	0.649	0.000768043
Entpd5	0.00042585	-0.260127	0.203	0.412	0.00640555
Ebpl	8.9e-06	-0.259212	0.62	0.75	0.000315982
Irx2	0.309343	-0.258821	0.038	0.108	0.582287
Ier3	NA	-0.255252	0.253	0.284	NA
Col4a5	0.000921814	-0.253974	0.291	0.385	0.0112743
Wnt5a	0.0127043	-0.253891	0.152	0.284	0.071209
Pigp	1.89e-06	-0.253378	0.848	0.899	9.11e-05
Tinagl1	0.0140023	-0.253124	0.101	0.27	0.0761141
Cubn	0.0131711	-0.252846	0.139	0.277	0.0730134
Penk	0.0828231	-0.252594	0.354	0.311	0.261659
Cebpb	0.00215017	-0.251612	0.468	0.547	0.0205203
Fxyd2	0.354847	-0.250645	0.709	0.77	0.624982
Amn	0.0690613	-0.250491	0.354	0.527	0.231383
Tenm4	0.000704105	-0.250207	0.405	0.5	0.0094111
Slc22a6	0.0525574	-0.249857	0.316	0.284	0.194722
Rora	0.00702617	-0.249386	0.177	0.304	0.0459207
Trim47	0.0054369	-0.248448	0.329	0.365	0.0390821
Arid5b	1.08e-05	-0.248211	0.797	0.892	0.00037185
Ddrgk1	1.5e-07	-0.248011	0.848	0.878	1.22e-05
Agpat5	1.64e-06	-0.247339	0.747	0.905	8.38e-05
Pfkp	0.000234501	-0.247141	0.456	0.581	0.00401922
4430402I18Rik	0.00492237	-0.246808	0.139	0.318	0.0366513
Itgav	NA	-0.245076	0.443	0.426	NA
Snhg18	8.33e-05	-0.243925	0.759	0.777	0.00191747
Tmem231	0.000900167	-0.243064	0.127	0.358	0.0110633
Aldh6a1	0.00513111	-0.242838	0.228	0.358	0.0374719
S100a1	0.00237944	-0.241839	0.582	0.628	0.0219195
Cdhr2	0.082473	-0.240898	0.089	0.189	0.260716
Gtpbp8	0.000509303	-0.23918	0.253	0.453	0.00735352
Ccdc80	NA	-0.237586	0.38	0.291	NA
Nfs1	4.73e-05	-0.237233	0.532	0.615	0.0012041
Hdhd3	0.000338306	-0.2362	0.228	0.412	0.00531067
Fuca1	3.04e-06	-0.23591	0.646	0.845	0.000131766
Pdk1	0.000431652	-0.235835	0.304	0.446	0.00645429
Dkk1	0.0420238	-0.234709	0.481	0.446	0.167265
Pex11g	0.005798	-0.233264	0.152	0.318	0.0405063
Sema3c	0.00720701	-0.232287	0.62	0.736	0.0466189
Phyhipl	0.0125586	-0.232152	0.443	0.486	0.0705883
Zbtb8os	1.19e-06	-0.231578	0.747	0.831	6.59e-05
Cisd3	0.000321728	-0.231368	0.316	0.453	0.00514663
Ndrg1	0.0674203	-0.230897	0.19	0.243	0.227588
Gm2a	0.00054198	-0.230568	0.291	0.412	0.00771479
Aldh1a2	5.33e-08	-0.23023	0.962	0.993	5.17e-06
Dusp14	0.00080016	-0.229686	0.608	0.696	0.0102335
Gm36529	0.0410723	-0.229686	0.063	0.243	0.165836
Rnaset2a	0.000177489	-0.229103	0.278	0.446	0.00330025
Tsix	0.00625273	-0.228708	0.127	0.324	0.0425203
Tet2	0.000569619	-0.228117	0.329	0.48	0.00801762
Cystm1	0.00253961	-0.228038	0.582	0.649	0.0229338
Slc6a6	NA	-0.227472	0.696	0.764	NA
Fzd4	0.000403058	-0.22717	0.722	0.743	0.00611749
Pck1	0.428887	-0.226395	0.038	0.101	0.68871
Ddit4	0.00229738	-0.226065	0.253	0.426	0.0213589
S100a10	9e-06	-0.225725	0.975	0.986	0.000317203
Cyp4a10	0.0661496	-0.225347	0.152	0.23	0.22386
Cutal	0.0201174	-0.224447	0.089	0.27	0.0992865
Ankrd37	0.000165559	-0.224206	0.38	0.568	0.00317206
Lox	0.396005	-0.222889	0.051	0.108	0.659812
Keg1	0.279414	-0.222668	0.316	0.399	0.546531
Adamts1	0.00295176	-0.222505	0.797	0.858	0.0258228
Nfib	0.00280142	-0.222445	0.418	0.527	0.0248527
Tmem205	8.57e-05	-0.222037	0.57	0.703	0.00195365
Svip	0.000815889	-0.222015	0.329	0.453	0.0103558
Spns2	NA	-0.221193	0.076	0.101	NA
Abca3	0.000829126	-0.220764	0.367	0.453	0.0104449
Tmem27	0.00331232	-0.220237	0.544	0.669	0.0279534
Slc23a1	0.00815708	-0.219533	0.203	0.331	0.0509338
Slc1a1	0.0749867	-0.219533	0.101	0.203	0.244859
Ankrd33b	0.0857668	-0.219533	0.127	0.223	0.267272
Grm4	0.0876424	-0.219533	0.076	0.196	0.270916
Igfbpl1	0.265243	-0.219533	0.051	0.122	0.53112
Rhoc	0.00224341	-0.218717	0.646	0.635	0.0211267
Eif3j2	4.89e-05	-0.218013	0.633	0.709	0.00123094
Plau	0.0679289	-0.217909	0.101	0.196	0.228959
Slc35b4	0.000811248	-0.217614	0.506	0.561	0.0103229
Lgmn	4.37e-05	-0.217042	0.81	0.838	0.00113177
Atp6v1a	0.000100375	-0.216875	0.848	0.824	0.00219909
Gucy1a1	0.0725653	-0.215864	0.215	0.291	0.239148
Smim1	0.00141844	-0.215247	0.506	0.615	0.0151752
Rgcc	NA	-0.21476	0.127	0.115	NA
Tmem169	0.0353171	-0.214595	0.101	0.25	0.148877
Stk32b	0.129706	-0.214418	0.051	0.189	0.3497
Sigirr	0.00395289	-0.214128	0.215	0.392	0.0312695
Hcfc1r1	0.000146279	-0.213337	0.595	0.716	0.00289059
Lmo4	0.00218586	-0.212898	0.797	0.838	0.020743
Tnfaip8	0.0167719	-0.212597	0.62	0.608	0.0865752
Clybl	0.00178765	-0.211986	0.316	0.453	0.01798
Ccdc189	0.00328367	-0.211986	0.203	0.345	0.0278091
Kif21a	0.0059215	-0.210784	0.785	0.784	0.0410824
Eva1b	0.000170017	-0.210663	0.759	0.845	0.00322073
Tlcd1	0.00148836	-0.210565	0.367	0.514	0.015756
Errfi1	0.0242516	-0.210317	0.278	0.304	0.113775
Lima1	7.17e-05	-0.210214	0.696	0.824	0.00166447
Cys1	0.000563204	-0.209905	0.62	0.588	0.00797187
Mnd1	9.62e-05	-0.209711	0.62	0.77	0.00212603
Srxn1	0.195659	-0.209632	0.089	0.142	0.445315
Isoc2b	0.0415361	-0.209277	0.063	0.25	0.166247
Dnajb14	0.000108743	-0.209141	0.544	0.682	0.00233173
Pamr1	0.00182516	-0.209089	0.316	0.419	0.0182843
Veph1	0.0021016	-0.208795	0.19	0.399	0.0202099
Ace	0.0492403	-0.208154	0.114	0.277	0.186138
Bdh1	0.00630944	-0.206848	0.203	0.338	0.042848
Aamdc	0.000491463	-0.206643	0.519	0.554	0.00722007
Gss	0.000184703	-0.206083	0.443	0.615	0.00333656
Tbc1d14	0.000396754	-0.205894	0.342	0.527	0.00605831
Sdc4	0.000393286	-0.205656	0.911	0.926	0.00602362
Tapbp	0.00582439	-0.204696	0.19	0.331	0.0405935
Tagln2	0.00151322	-0.2032	0.772	0.77	0.0159188
Btg2	0.037199	-0.201395	0.544	0.574	0.153644
Tram1	8.42e-05	-0.201226	0.684	0.804	0.00192876
Gm10093	0.000861308	-0.200787	0.253	0.405	0.0107155
Wwp1	0.00572293	-0.200762	0.582	0.595	0.0404458
Picalm	0.0001817	-0.200184	0.81	0.797	0.00332015
Tcn2	0.00890353	-0.200172	0.43	0.574	0.0540728
Rabac1	1.87e-05	-0.200089	0.899	0.905	0.000582373
S100a13	0.00351169	-0.20004	0.278	0.392	0.0287901
Pgm2	0.00104847	-0.198914	0.494	0.568	0.0123729
Rdm1	0.000235792	-0.19848	0.481	0.628	0.00401958
Pmepa1	0.0340658	-0.198433	0.316	0.405	0.145226
Cited4	NA	-0.198204	0.038	0.101	NA
Chpt1	0.00241732	-0.197604	0.658	0.682	0.0221068
Sgms2	0.018869	-0.197555	0.139	0.297	0.094608
Gm10639	0.365954	-0.197555	0.089	0.108	0.634345
Phldb2	0.000190913	-0.196507	0.873	0.919	0.00341139
Mrps17	1.28e-05	-0.196443	0.987	0.953	0.000424992
Ets1	0.00884702	-0.196411	0.203	0.324	0.0539059
Smoc2	NA	-0.196222	0.127	0.068	NA
Atp11a	0.00330168	-0.195	0.291	0.392	0.0279147
Enpp2	0.00340522	-0.194917	0.747	0.75	0.0284088
Pcdh17	0.0604052	-0.194841	0.329	0.324	0.210645
Nenf	1.25e-08	-0.193834	0.975	0.973	1.43e-06
Thbs1	0.273191	-0.192781	0.139	0.128	0.539636
Psen2	0.00161931	-0.192468	0.291	0.412	0.016755
Cotl1	2.03e-05	-0.191778	0.873	0.932	0.000615713
Acy3	0.0100749	-0.191009	0.43	0.432	0.0598666
Ctgf	0.250439	-0.190888	0.076	0.135	0.513946
Abhd5	0.00472442	-0.190233	0.165	0.345	0.0356917
Myo6	2.81e-05	-0.189968	0.949	0.939	0.00079438
Atf3	NA	-0.189531	0.089	0.115	NA
Relb	0.044827	-0.189252	0.152	0.243	0.175375
Anxa3	0.0641476	-0.188443	0.367	0.311	0.219443
Npl	0.0936655	-0.187785	0.177	0.216	0.282285
Rmdn1	0.00240569	-0.1876	0.215	0.392	0.0220405
Fads3	0.015095	-0.187273	0.291	0.338	0.080624
Nipsnap2	0.000575641	-0.186679	0.684	0.757	0.00807982
Myl9	NA	-0.186527	0.443	0.432	NA
Stx17	0.00133239	-0.186335	0.228	0.459	0.0145955
Eml2	0.00150308	-0.186219	0.304	0.446	0.0158452
Morc4	0.00224654	-0.186219	0.291	0.432	0.0211267
Sat1	0.0138031	-0.186164	0.481	0.547	0.0754501
Golga1	0.00278868	-0.185917	0.354	0.493	0.0247834
Ccng1	0.00820552	-0.18526	0.215	0.392	0.0511095
Gramd1b	0.00356164	-0.185184	0.304	0.412	0.0289937
Slc16a3	0.00853953	-0.185113	0.304	0.365	0.0525405
Gcat	0.00114414	-0.185047	0.772	0.777	0.0130733
Satb2	0.0597029	-0.184442	0.076	0.25	0.209929
Ebf1	0.167045	-0.184166	0.228	0.182	0.403651
Lpcat3	0.000255304	-0.183747	0.734	0.736	0.004274
Rmi1	0.00205375	-0.183166	0.354	0.486	0.0199017
Ntm	0.0182069	-0.183166	0.582	0.622	0.0922054
Klf6	0.0635969	-0.183166	0.519	0.405	0.218152
Cdkn1b	0.00130387	-0.182538	0.658	0.662	0.0143769
Cpq	0.00697957	-0.182216	0.329	0.412	0.0457348
Hacl1	0.00834999	-0.182216	0.354	0.439	0.0517535
Slc25a20	0.00324389	-0.182065	0.228	0.392	0.0276004
Rnf6	0.00141602	-0.181683	0.873	0.818	0.0151752
Mapk13	0.0047141	-0.181401	0.354	0.439	0.0356917
Ets2	0.00286509	-0.180238	0.557	0.628	0.025284
Selenoo	0.0048799	-0.179924	0.228	0.392	0.0365476
Bst2	0.0517945	-0.179793	0.177	0.27	0.192899
Gas2	0.142073	-0.179575	0.633	0.534	0.371319
1300002E11Rik	0.000899658	-0.179455	0.392	0.52	0.0110633
Ccdc28b	0.000475368	-0.17943	0.544	0.622	0.00704524
Rab11fip3	0.00633734	-0.17919	0.266	0.405	0.0429218
Tfcp2l1	0.0153055	-0.178056	0.253	0.372	0.0811836
Efna1	0.00508191	-0.177861	0.392	0.473	0.0372747
Abhd14b	0.00337472	-0.17638	0.316	0.453	0.0282949
Fam35a	0.00533763	-0.176048	0.19	0.351	0.0385887
Enpp5	0.0112639	-0.176048	0.139	0.338	0.0652399
Rarres2	0.287605	-0.176048	0.139	0.169	0.555903
Spink1	NA	-0.176005	0.367	0.372	NA
2810006K23Rik	0.000765107	-0.175925	0.646	0.642	0.00988558
Mfsd4a	0.0143891	-0.175731	0.127	0.311	0.0779642
Tpm1	0.00751321	-0.175661	0.911	0.926	0.0476215
Npepl1	0.00209406	-0.175619	0.418	0.534	0.0201758
Prr15	0.00809597	-0.174867	0.278	0.453	0.0506149
Sgpp1	0.0240116	-0.174237	0.215	0.311	0.112973
Snhg9	0.00078937	-0.174071	0.443	0.595	0.0101212
Sec23ip	0.00249001	-0.174071	0.456	0.561	0.0226075
Fam173a	6.89e-05	-0.174017	0.785	0.818	0.00163007
Tmsb15b1	0.329782	-0.173272	0	0.155	0.601937
Slfn9	0.093272	-0.173013	0.089	0.23	0.281773
Vill	0.00142295	-0.172694	0.43	0.541	0.0151912
Mrpl33	1.27e-05	-0.172254	0.924	0.946	0.000424258
Ccdc173	0.0148732	-0.171763	0.19	0.331	0.0796449
Epcam	0.00229531	-0.171636	0.962	0.845	0.0213589
Abhd17c	0.000729275	-0.170743	0.671	0.723	0.00961993
Hibadh	0.000845025	-0.170743	0.848	0.851	0.0105922
Zbtb4	0.0340529	-0.170743	0.127	0.277	0.145226
Kank1	0.00152168	-0.170362	0.418	0.507	0.0159745
Mxi1	0.000611303	-0.170191	0.696	0.743	0.00841628
Pink1	0.00125924	-0.170053	0.468	0.581	0.0140695
Casc4	0.000496536	-0.169936	0.658	0.736	0.00727339
Wdr89	9.67e-05	-0.169825	0.709	0.811	0.0021286
Hykk	0.0502375	-0.169644	0.139	0.257	0.188662
Alg6	0.00104391	-0.169606	0.43	0.588	0.0123481
Rab11a	7.77e-06	-0.169224	1	0.986	0.000281526
Cryzl2	0.00399509	-0.16918	0.367	0.5	0.0315537
Acot1	0.0475865	-0.169001	0.797	0.77	0.18152
Atp1b1	0.00514853	-0.168818	0.937	0.912	0.0375448
Echdc1	0.00344139	-0.168725	0.43	0.507	0.0285223
Nfkb1	0.00873865	-0.168725	0.329	0.473	0.0534394
Tanc2	0.00319079	-0.1687	0.494	0.574	0.0272515
Hmga1b	0.167339	-0.168331	0.051	0.203	0.404035
Aldoc	0.19975	-0.168331	0.051	0.189	0.450556
Senp7	0.000482205	-0.168192	0.57	0.662	0.00710476
Itm2b	3.11e-06	-0.167964	0.987	0.993	0.000132682
Cmc4	0.00645739	-0.167798	0.253	0.365	0.0433698
Sgk3	0.00112827	-0.167745	0.62	0.689	0.0129584
Aqp11	0.0572046	-0.167721	0.253	0.372	0.205119
Cobll1	0.00459071	-0.167662	0.443	0.486	0.0349963
Sufu	0.00224975	-0.167165	0.392	0.5	0.0211267
2410018L13Rik	0.00401606	-0.167165	0.342	0.439	0.0315704
Tubd1	0.203267	-0.167165	0.063	0.182	0.454743
Nthl1	0.00150229	-0.166636	0.354	0.514	0.0158452
Mettl27	0.0228497	-0.166568	0.266	0.338	0.10826
Fkrp	0.00100381	-0.166281	0.468	0.635	0.0119579
Mxra8	0.0253717	-0.165924	0.266	0.311	0.117508
Slc44a4	0.122707	-0.165731	0.114	0.216	0.336409
Nr4a2	0.264418	-0.165731	0.089	0.155	0.530414
Desi2	4.05e-05	-0.165372	0.797	0.858	0.00107939
Sh3rf1	0.00161589	-0.165266	0.443	0.514	0.0167541
Hint3	0.00351699	-0.165082	0.38	0.486	0.0287901
Dhx32	0.00497747	-0.164474	0.392	0.493	0.0367764
Pnmal2	0.00601903	-0.164287	0.215	0.372	0.0413361
Wnt16	0.190419	-0.164287	0.165	0.155	0.437938
Pls1	0.022708	-0.164118	0.228	0.331	0.107847
Pttg1ip	0.00254743	-0.163985	0.709	0.723	0.0229634
Cox6b2	0.0167133	-0.163694	0.316	0.399	0.0865551
Gtpbp2	0.00157101	-0.163465	0.468	0.547	0.0163899
Rps18	2.97e-38	-0.162909	1	1	7.49e-35
Phyh	0.0035252	-0.162682	0.468	0.574	0.0287901
Nfia	0.0564301	-0.162547	0.152	0.277	0.203497
Rab18	0.000314507	-0.162233	0.861	0.899	0.00506326
Zfand6	2.88e-05	-0.161596	0.899	0.878	0.000807482
Ccser1	0.00489464	-0.16149	0.329	0.432	0.0365476
Atg10	0.00402471	-0.161457	0.392	0.493	0.0315704
Lgals1	0.0186168	-0.161239	0.595	0.595	0.0939039
Wwc1	0.00230743	-0.161201	0.658	0.676	0.0213734
4921524J17Rik	0.000721745	-0.16115	0.772	0.791	0.0095456
Pecr	0.000159299	-0.160693	0.772	0.872	0.00308734
Crat	0.00839468	-0.160693	0.19	0.345	0.0519666
Dusp22	0.0176519	-0.160693	0.19	0.345	0.0900281
Gclc	0.0060452	-0.160128	0.595	0.568	0.041393
Hgsnat	0.00653789	-0.159835	0.241	0.385	0.0435773
Ccdc126	0.0582797	-0.159635	0.089	0.264	0.207138
Tmem106c	0.00108303	-0.159496	0.57	0.649	0.0126329
Myof	0.012136	-0.159496	0.468	0.601	0.068789
Klhdc7a	0.374999	-0.158473	0.038	0.135	0.642073
Slc35a1	0.000595704	-0.158298	0.646	0.757	0.00826929
Nme4	3.06e-06	-0.158199	0.949	0.926	0.000131766
Aldob	NA	-0.158164	0.468	0.432	NA
Slc25a1	0.000739498	-0.157906	0.684	0.696	0.00967879
Serinc3	0.00529666	-0.157756	0.392	0.486	0.0384027
Sobp	0.0636981	-0.157351	0.203	0.284	0.21835
Plp2	0.000220626	-0.157334	0.785	0.851	0.00384683
Smyd3	0.00216362	-0.15705	0.392	0.493	0.0206096
Decr1	0.000158377	-0.156733	0.772	0.838	0.00308378
Tyw3	0.0117205	-0.156733	0.367	0.385	0.0669608
Ddr1	0.00332324	-0.156631	0.544	0.601	0.0279563
Fbxo36	0.0104259	-0.156355	0.266	0.385	0.061374
Creb3l1	0.0457743	-0.156175	0.215	0.378	0.177394
Cfh	0.222889	-0.156175	0.266	0.243	0.480179
Slc2a1	0.00176848	-0.156037	0.443	0.622	0.0178227
Dusp3	0.0581768	-0.155897	0.177	0.25	0.207029
Sema5a	0.00497436	-0.155767	0.658	0.75	0.0367764
Nhsl1	0.0132433	-0.155767	0.316	0.378	0.0732524
Pura	0.000146231	-0.155682	0.823	0.845	0.00289059
Pdzrn3	0.115969	-0.154681	0.114	0.236	0.324931
Fndc5	0.0714795	-0.154511	0.291	0.331	0.236808
Ezr	0.000109333	-0.154471	1	0.986	0.00233444
Pth1r	0.027205	-0.15433	0.671	0.75	0.123168
Ap2a2	0.0031351	-0.154222	0.911	0.831	0.0268669
Chd3	0.000967996	-0.154129	0.772	0.831	0.0116414
Cckar	0.361685	-0.153936	0.025	0.149	0.631705
Has3	0.0144743	-0.153607	0.177	0.351	0.0783416
Ppp1r14a	0.304314	-0.15349	0.19	0.236	0.576496
Anks4b	0.0562308	-0.153313	0.367	0.426	0.203116
Tmbim6	0.000173417	-0.153289	0.962	0.98	0.00326063
Rhod	0.00386801	-0.153088	0.418	0.473	0.0308603
Tpk1	0.0519552	-0.152842	0.165	0.27	0.193355
Vasp	0.00331736	-0.152394	0.633	0.669	0.0279534
Adgrg1	0.219117	-0.152394	0.076	0.182	0.476999
Ppp1r1a	0.268683	-0.152394	0.089	0.162	0.53345
App	0.000210611	-0.152145	0.975	0.959	0.00371782
Ddt	0.000226421	-0.151997	0.848	0.892	0.00393425
Pms1	0.00856713	-0.151997	0.304	0.365	0.0526461
P2rx4	0.0799309	-0.151951	0.165	0.243	0.256053
Parm1	0.379097	-0.151892	0.051	0.135	0.646015
Met	0.00408864	-0.151767	0.43	0.534	0.0319917
Kidins220	0.0203137	-0.151617	0.57	0.622	0.0998639
Atp6v1c1	0.00878699	-0.151396	0.696	0.642	0.0536699
Zfp598	0.00510658	-0.151325	0.354	0.459	0.0373469
Zfp1	0.00316208	-0.15115	0.468	0.595	0.0270521
Fstl3	0.0548814	-0.151077	0.165	0.277	0.199385
Adamtsl1	0.220595	-0.150222	0.127	0.203	0.477893
Osbpl3	0.00585146	-0.149724	0.392	0.486	0.0407258
Filip1l	0.110587	-0.149466	0.228	0.257	0.316618
Clic1	1e-05	-0.148764	1	1	0.000349495
Ppp2r5a	0.00225145	-0.148645	0.608	0.676	0.0211267
Coil	0.00725051	-0.14838	0.215	0.432	0.0467203
Mthfsl	0.0171284	-0.14838	0.278	0.372	0.0879883
Gba	0.0752592	-0.147904	0.152	0.264	0.245413
Zbtb18	0.0796767	-0.147904	0.127	0.25	0.255677
Vamp8	0.000506394	-0.147889	0.899	0.905	0.00735352
Zgpat	0.00640463	-0.147502	0.316	0.432	0.0432034
Serhl	0.0055987	-0.147396	0.405	0.446	0.0398675
0610005C13Rik	0.141665	-0.147234	0.405	0.514	0.371128
Brip1	0.0111538	-0.146798	0.329	0.446	0.0646769
Ikbip	0.00292577	-0.146608	0.456	0.574	0.0256846
Dusp6	0.0139753	-0.146608	0.392	0.432	0.0760491
Adgrg6	0.352966	-0.146289	0.076	0.135	0.623469
Gatm	0.265001	-0.146235	0.165	0.155	0.53112
Itpr1	0.0365242	-0.146106	0.241	0.372	0.151353
Tmem230	0.00136031	-0.145922	0.62	0.689	0.0148047
Cyp20a1	0.00363723	-0.145425	0.468	0.52	0.0295137
Sil1	0.011079	-0.144678	0.253	0.365	0.0644657
Ccdc148	0.261937	-0.14452	0.063	0.169	0.527539
Ntn4	0.283963	-0.14452	0.051	0.176	0.55145
Aga	0.00632953	-0.144223	0.418	0.514	0.0429218
Zscan26	0.0155584	-0.143945	0.278	0.358	0.0821561
Rapgef3	0.229954	-0.143635	0.076	0.182	0.48789
Hoxb6	0.0469673	-0.143561	0.81	0.73	0.179566
Nav3	0.497086	-0.143501	0.013	0.122	0.729416
Sypl	0.00094421	-0.143451	0.785	0.818	0.0114098
Dnase2a	0.0122037	-0.143344	0.342	0.385	0.0690172
Ccs	0.00340387	-0.143071	0.823	0.736	0.0284088
Arhgap29	0.0700199	-0.142814	0.228	0.338	0.233353
Phgdh	4.34e-05	-0.142762	0.987	0.993	0.00113177
Etfb	2.25e-06	-0.142659	0.975	0.966	0.000104843
Aplp1	0.0453308	-0.142518	0.278	0.27	0.176524
Btrc	0.00296582	-0.14199	0.595	0.635	0.025856
St3gal2	0.0282071	-0.14161	0.203	0.338	0.12623
Pgap2	0.00121572	-0.141369	0.595	0.696	0.0136741
Cbr1	0.000359996	-0.141307	0.937	0.966	0.00561616
Meg3	NA	-0.141143	0.443	0.216	NA
Carf	0.089034	-0.141095	0.114	0.25	0.273063
G0s2	0.0842561	-0.140106	0.316	0.324	0.264321
Pter	0.03489	-0.139916	0.532	0.601	0.147864
Farp1	0.00201514	-0.139859	0.722	0.709	0.0196028
Elovl7	0.016803	-0.139815	0.342	0.385	0.0865752
Actr1a	0.0047676	-0.13973	0.582	0.655	0.035964
Ppp1r21	0.0059526	-0.13973	0.519	0.601	0.0411456
Fhl2	0.0905677	-0.138633	0.165	0.284	0.275753
Kap	0.518062	-0.138586	0	0.128	0.744836
Serpinf2	0.128744	-0.13829	0.291	0.338	0.348038
Aph1c	0.171663	-0.138244	0.089	0.209	0.40974
Abhd4	0.0283979	-0.137703	0.215	0.324	0.126523
Pkp4	0.00500517	-0.137591	0.684	0.73	0.0368191
Stx4a	0.0022717	-0.137564	0.519	0.716	0.0211983
Cryz	0.00353438	-0.13752	0.823	0.824	0.0288184
Lhfp	0.0608111	-0.137295	0.215	0.324	0.211233
Mlx	0.00845745	-0.137127	0.392	0.459	0.0521629
Sema4d	0.00424045	-0.13672	0.468	0.595	0.0329748
Ankrd12	0.0151818	-0.136479	0.57	0.642	0.0807138
Eps8l2	0.0776591	-0.136479	0.177	0.264	0.251332
Arhgef16	0.0105575	-0.136334	0.43	0.561	0.0619318
Sod3	0.457986	-0.136	0.025	0.128	0.7091
Creb3	0.00646142	-0.135913	0.392	0.534	0.0433698
Pdzk1ip1	0.255026	-0.135913	0.253	0.284	0.518385
Tmem135	0.0121104	-0.135515	0.342	0.426	0.068721
Pigh	0.00734402	-0.13545	0.468	0.493	0.0468663
Tm7sf3	0.00560154	-0.134909	0.405	0.527	0.0398675
Acadl	0.000982709	-0.134537	0.949	0.926	0.0117343
Apaf1	0.0986156	-0.134376	0.139	0.25	0.292197
Ptpru	0.29569	-0.134376	0.114	0.162	0.566317
Os9	0.00493145	-0.133981	0.608	0.655	0.0366513
Rab13	0.006216	-0.133964	0.608	0.635	0.0424327
Tceanc2	0.0224891	-0.133702	0.203	0.345	0.107212
Hbp1	0.00400468	-0.133557	0.557	0.642	0.0315704
Tpra1	0.0935197	-0.132941	0.152	0.264	0.282014
Urgcp	0.169129	-0.132824	0.089	0.216	0.406603
Tvp23b	0.00139273	-0.132716	0.734	0.73	0.0150277
Top1mt	0.0644152	-0.131565	0.19	0.264	0.219911
Abcc1	0.0877418	-0.131565	0.152	0.264	0.270916
Dync2li1	0.00113022	-0.131523	0.772	0.791	0.0129584
Smagp	0.0204777	-0.131341	0.797	0.736	0.100376
Prlr	0.289296	-0.131341	0.089	0.162	0.558432
Prmt2	0.00733692	-0.13117	0.443	0.493	0.0468663
[truncated: 4,558 more rows]

## Sheet: Tub_progenitors5.MutVsCTRL.DEGs
Gene	p_val	avg_logFC	pct.1	pct.2	p_val_adj
[truncated: 2,243 more rows]

[truncated: 1 more sheets: Tub_progenitors6.MutVsCTRL.DEGs]
