# Supplementary material for: Smarca4 deficiency induces Pttg1 oncogene upregulation and hyperproliferation of tubular and interstitial cells during kidney development
Source: Front Cell Dev Biol. 2023 Sep 4;11:1233317. doi: 10.3389/fcell.2023.1233317 (PMC10506413; doi:10.3389/fcell.2023.1233317)
Supplement: Supplementary file 5 [file Table4.XLSX]

## Sheet: Stroma_cluster0.MutVsCTRL.DEGs
Gene	p_val	avg_logFC	pct.1	pct.2	p_val_adj
Rpl29	3.92903e-161	-0.384991	1	1	7.56732e-158
Gm10260	1.75645e-72	1.48773	0.517	0.037	1.69146e-69
Rps2	1.60497e-71	0.336851	0.998	0.997	1.03039e-68
Uba52	1.71638e-69	0.483529	0.992	0.96	8.26436e-67
Tpm3-rs7	1.95372e-60	0.654448	0.675	0.133	7.52572e-58
Rps18	5.44955e-51	-0.150977	1	1	1.74931e-48
Pttg1	1.48793e-41	0.727421	0.759	0.55	4.09393e-39
Rpl35	6.60836e-40	0.223084	1	1	1.59096e-37
Eif3j1	1.37112e-37	0.52734	0.847	0.586	2.9342e-35
Pebp1	1.06828e-35	0.312099	0.997	0.992	2.0575e-33
Rps21	2.01726e-35	0.199068	1	1	3.53205e-33
Pdia6	4.03885e-32	0.378616	0.989	0.977	6.48236e-30
Hspa8	1.66385e-31	0.319342	0.998	1	2.46506e-29
Erh	1.96801e-31	0.371278	0.982	0.935	2.70742e-29
Cox5b	5.07503e-25	0.299806	0.991	0.977	6.51633e-23
Ubc	8.33625e-24	-0.303604	0.985	0.98	1.00348e-21
Ppia	1.08032e-23	0.189821	1	1	1.22393e-21
Gm10076	1.47393e-22	0.332979	0.962	0.892	1.5771e-20
Ybx1	2.48587e-20	0.233483	1	0.997	2.51989e-18
Gm10036	5.20639e-20	-0.292766	0.457	0.595	5.01375e-18
Basp1	2.95711e-19	0.424357	0.98	0.966	2.66008e-17
Gm13305	3.03851e-19	-0.358646	0.247	0.555	2.66008e-17
Rbp1	6.42597e-19	0.367344	0.989	0.969	5.38105e-17
Tmsb10	9.97583e-19	0.269986	1	1	8.00561e-17
Irak1bp1	1.12108e-18	0.359272	0.587	0.3	8.63682e-17
Atp5k	3.00128e-18	0.24568	1	0.983	2.22325e-16
Oaz1	3.76952e-18	0.211716	0.998	1	2.68892e-16
Ciapin1	6.70171e-18	0.355665	0.745	0.567	4.60982e-16
Srsf2	8.15134e-18	0.289067	0.991	0.977	5.3046e-16
Rps27	8.26261e-18	0.162885	1	1	5.3046e-16
Cfl1	1.12723e-17	0.229988	1	0.997	7.00334e-16
Alad	1.44908e-17	-0.274922	0.563	0.708	8.72163e-16
Arf5	2.03688e-17	0.259188	0.988	0.992	1.1888e-15
Ptma	2.11584e-17	0.208666	1	1	1.19856e-15
Vcp	3.49536e-17	0.277289	0.988	0.972	1.92345e-15
Calr	7.51303e-17	0.311829	0.989	0.983	4.01947e-15
Gstp1	3.40215e-16	0.324877	0.728	0.51	1.77096e-14
Eif1	5.68537e-16	0.205026	0.998	0.997	2.88159e-14
Prdx1	8.44821e-16	0.247464	0.997	0.992	4.17212e-14
Sec61g	1.47998e-15	0.229047	0.998	0.997	7.12611e-14
Cdk4	2.39383e-15	0.225285	0.989	0.989	1.12452e-13
Hist1h2ap	3.88008e-15	0.726406	0.95	0.83	1.77929e-13
Actg1	5.02327e-15	0.269313	1	1	2.24996e-13
Sfr1	1.9479e-14	0.266004	0.988	0.949	8.5265e-13
Serpinh1	2.60862e-14	0.245629	0.991	0.986	1.11649e-12
Wdfy1	2.91986e-14	0.313815	0.463	0.195	1.22253e-12
Rgs5	4.1975e-14	-0.376763	0.499	0.677	1.72008e-12
Fam32a	4.70545e-14	0.304076	0.838	0.663	1.88806e-12
Atp5a1	8.53507e-14	0.205275	0.997	0.994	3.3548e-12
Srsf3	1.47679e-13	0.234276	0.998	0.994	5.6886e-12
Eif5	1.95418e-13	0.30528	0.961	0.921	7.37991e-12
Rpl38	2.65637e-13	0.145266	1	1	9.83878e-12
Hspa5	7.03024e-13	0.319128	0.982	0.977	2.55476e-11
Snrpg	1.20362e-12	0.2345	0.982	0.949	4.29292e-11
Sae1	1.25351e-12	0.26808	0.967	0.924	4.38956e-11
Marcksl1	2.96595e-12	0.248398	0.98	0.958	1.02008e-10
Dnaja1	3.36624e-12	0.258655	0.995	0.986	1.13744e-10
Ppp1r14a	3.99826e-12	-0.429047	0.499	0.629	1.3277e-10
Rpl36	5.0119e-12	0.142404	1	0.997	1.63609e-10
Maged1	6.29415e-12	0.234107	0.982	0.966	2.02042e-10
Cox7c	8.41007e-12	0.188426	0.998	0.997	2.62324e-10
Raly	8.44449e-12	0.242503	0.988	0.958	2.62324e-10
Igfbp4	1.02378e-11	0.274998	0.976	0.96	3.12984e-10
Fkbp1a	1.28229e-11	0.247136	0.988	0.975	3.8589e-10
Eif5a	1.72877e-11	0.246021	0.994	0.992	5.04784e-10
Psmb6	1.72979e-11	0.225389	0.989	0.983	5.04784e-10
Psmd1	2.83329e-11	0.260679	0.883	0.796	8.1402e-10
mt-Cytb	2.87401e-11	0.207115	0.994	0.997	8.1402e-10
Psmd7	4.32784e-11	0.240712	0.974	0.952	1.1911e-09
Ywhaq	4.32901e-11	0.212542	0.992	0.972	1.1911e-09
Selenow	4.50166e-11	0.199989	0.998	0.989	1.22115e-09
Ube2m	4.92666e-11	0.238718	0.956	0.912	1.31788e-09
Filip1l	5.07255e-11	-0.25353	0.514	0.691	1.33832e-09
Fosb	5.62131e-11	-0.423084	0.463	0.552	1.46306e-09
Romo1	6.22433e-11	0.231931	0.967	0.932	1.59841e-09
Ostc	7.93828e-11	0.23233	0.98	0.958	2.01173e-09
Prdx2	8.80605e-11	0.182883	0.998	0.994	2.20266e-09
Hsp90aa1	1.19596e-10	0.213607	0.998	0.992	2.9531e-09
Arap1	1.24296e-10	0.295622	0.687	0.524	3.0303e-09
Hmgn2	1.29984e-10	0.246687	0.998	0.997	3.12936e-09
H2afy	2.05491e-10	0.217291	0.983	0.975	4.88613e-09
Fdps	2.12209e-10	0.401211	0.517	0.365	4.98433e-09
Psmc5	2.80998e-10	0.243289	0.947	0.904	6.52051e-09
Ifitm1	3.04217e-10	-0.216452	0.85	0.929	6.97525e-09
Calm1	4.1906e-10	0.22185	1	1	9.4954e-09
Rpn2	5.04305e-10	0.239666	0.936	0.87	1.12229e-08
Rbm3	5.06955e-10	0.180436	0.998	0.997	1.12229e-08
Ndufa4	7.01501e-10	0.195574	1	0.992	1.52937e-08
Usp50	7.06717e-10	0.251525	0.571	0.357	1.52937e-08
Arpc2	1.00126e-09	0.211423	0.991	0.963	2.14269e-08
Ywhah	1.07748e-09	0.242062	0.964	0.949	2.28046e-08
Pomp	1.43612e-09	0.219354	0.979	0.938	3.00649e-08
Ppp1ca	1.66167e-09	0.195611	0.994	0.98	3.42179e-08
Cfl2	1.67003e-09	0.239867	0.918	0.844	3.42179e-08
Hdac1	1.73257e-09	0.238107	0.891	0.799	3.51255e-08
Il11ra1	1.86713e-09	0.294013	0.756	0.623	3.74594e-08
Mns1	1.89636e-09	0.264402	0.533	0.323	3.76535e-08
Gadd45gip1	1.93327e-09	0.247443	0.775	0.654	3.79947e-08
Hmgn1	2.47096e-09	0.172369	1	0.997	4.80715e-08
Ran	2.67033e-09	0.189456	1	1	5.14305e-08
mt-Nd6	2.75974e-09	-0.207417	0.496	0.603	5.26262e-08
Timp3	2.8081e-09	-0.225556	0.813	0.87	5.30236e-08
Col1a1	3.0363e-09	0.342837	0.976	0.98	5.67759e-08
Timm17a	3.10207e-09	0.236248	0.838	0.731	5.74479e-08
Mest	3.45044e-09	0.306875	0.982	0.966	6.32909e-08
Ahsa1	3.76721e-09	0.240254	0.857	0.793	6.84495e-08
Ssr2	3.82389e-09	0.216539	0.971	0.955	6.883e-08
Eif3i	4.46634e-09	0.198867	0.977	0.955	7.90581e-08
Fth1	4.47421e-09	0.184409	0.998	1	7.90581e-08
Adrm1	6.26877e-09	0.23866	0.792	0.669	1.0976e-07
Ilf2	6.49136e-09	0.227996	0.954	0.898	1.12634e-07
Nr2f1	7.56552e-09	0.277042	0.657	0.49	1.301e-07
Trir	8.2627e-09	0.217437	0.95	0.921	1.40832e-07
Ppp2r2d	8.96049e-09	0.240438	0.718	0.601	1.51385e-07
Anxa6	1.10581e-08	0.236804	0.91	0.836	1.85199e-07
Atp5e	1.19797e-08	0.168816	0.998	0.997	1.98904e-07
Atp5b	1.28179e-08	0.178194	0.997	0.994	2.11003e-07
Fn1	1.34946e-08	0.340374	0.935	0.836	2.20259e-07
Tmed9	1.60932e-08	0.21342	0.967	0.96	2.59104e-07
Hist1h2ab	1.62319e-08	0.342476	0.542	0.416	2.59104e-07
Uqcrc1	1.62781e-08	0.22578	0.93	0.907	2.59104e-07
mt-Nd4	1.69814e-08	0.183325	0.989	0.997	2.68083e-07
Isyna1	1.86567e-08	0.280787	0.806	0.708	2.92136e-07
Rpl27	2.02279e-08	0.191756	0.986	0.96	3.14184e-07
Hnrnpa3	2.16612e-08	0.225707	1	0.997	3.33755e-07
Phb	2.55039e-08	0.227399	0.806	0.669	3.89846e-07
D8Ertd738e	2.69461e-08	0.198789	0.977	0.949	4.08647e-07
Myl6	2.79746e-08	0.176951	1	1	4.197e-07
Rnf7	2.81108e-08	0.209162	0.954	0.901	4.197e-07
Sap18	3.15062e-08	0.220235	0.907	0.867	4.66777e-07
Mfap2	3.25302e-08	0.241491	0.958	0.932	4.78022e-07
Set	3.27616e-08	0.209514	0.998	0.997	4.78022e-07
Pkdcc	3.41448e-08	0.297432	0.942	0.867	4.94458e-07
Cct7	3.55655e-08	0.202231	0.973	0.966	5.11188e-07
1810058I24Rik	3.97513e-08	0.206276	0.971	0.935	5.67119e-07
G0s2	4.44645e-08	-0.361342	0.564	0.632	6.29696e-07
Pdia3	4.84929e-08	0.20699	0.974	0.972	6.81732e-07
Vdac3	5.0115e-08	0.206892	0.974	0.946	6.99432e-07
Rpl37	5.4053e-08	0.112088	1	1	7.48964e-07
Srsf7	5.66641e-08	0.209914	0.983	0.977	7.79536e-07
Mdk	5.88247e-08	0.176987	0.995	0.986	8.03521e-07
Slc25a4	7.29668e-08	0.148793	1	1	9.89676e-07
Atp5j2	8.42093e-08	0.163329	0.991	0.986	1.13418e-06
Pgk1	9.16635e-08	-0.109898	0.97	0.977	1.22354e-06
Nnat	9.26909e-08	0.30998	0.352	0.187	1.22354e-06
Anxa2	9.27942e-08	0.220329	1	0.975	1.22354e-06
Sec61b	9.33855e-08	0.208893	0.985	0.986	1.22354e-06
Gucy1a1	9.81523e-08	-0.212341	0.889	0.915	1.27174e-06
Manf	9.83849e-08	0.244718	0.941	0.895	1.27174e-06
Rpl37a	1.07236e-07	0.113767	1	1	1.37691e-06
Mpp6	1.20169e-07	0.228292	0.92	0.867	1.53275e-06
Odc1	1.22755e-07	0.244387	0.873	0.796	1.55544e-06
Clmp	1.28801e-07	0.254684	0.731	0.592	1.62138e-06
Nme1	1.33498e-07	0.213106	0.989	0.972	1.66959e-06
Hnrnpm	1.38839e-07	0.198387	0.98	0.966	1.72519e-06
Dcakd	1.50645e-07	0.216906	0.845	0.742	1.85989e-06
Fkbp10	1.65227e-07	0.223388	0.775	0.671	2.02693e-06
Slc16a3	1.67737e-07	-0.19519	0.354	0.501	2.04351e-06
Pdgfra	1.68701e-07	0.275541	0.856	0.773	2.04351e-06
Hnrnpa2b1	1.84624e-07	0.202513	0.995	0.997	2.20218e-06
Stmn1	1.847e-07	0.222404	1	0.992	2.20218e-06
Actb	1.8523e-07	0.168286	1	1	2.20218e-06
Cyc1	1.90474e-07	0.206718	0.948	0.892	2.25063e-06
Arl3	1.91746e-07	0.219313	0.857	0.754	2.25185e-06
Dnajc3	2.02684e-07	0.233485	0.838	0.725	2.36588e-06
Eif4a1	2.04091e-07	0.171729	0.998	0.992	2.36795e-06
Akirin1	2.30316e-07	0.215919	0.472	0.3	2.65622e-06
Sparcl1	2.35659e-07	0.313728	0.716	0.615	2.70166e-06
Metap2	2.37137e-07	0.187486	0.974	0.955	2.70252e-06
Lamp1	2.44053e-07	0.202874	0.961	0.915	2.76498e-06
Fkbp8	2.50125e-07	0.205276	0.927	0.87	2.8172e-06
Arl6ip4	2.51934e-07	0.216677	0.795	0.635	2.82107e-06
Selenos	2.81729e-07	0.249336	0.785	0.705	3.13647e-06
Pcbp1	2.92537e-07	0.185019	0.983	0.972	3.23808e-06
Rcn3	3.04679e-07	0.214351	0.964	0.935	3.35321e-06
Pitpna	3.19457e-07	0.211024	0.832	0.731	3.49587e-06
Hsp90b1	3.24876e-07	0.262789	0.986	0.989	3.53509e-06
Ptbp1	3.28407e-07	0.207198	0.901	0.836	3.55344e-06
Cnbp	3.30712e-07	0.189783	0.992	0.983	3.55839e-06
Grcc10	3.47986e-07	0.212976	0.543	0.377	3.72345e-06
Tyms	3.92325e-07	0.280873	0.923	0.856	4.17469e-06
Tcf3	4.15402e-07	0.21031	0.822	0.711	4.39596e-06
Alcam	4.26125e-07	0.296123	0.933	0.878	4.48479e-06
Camk2n1	4.39761e-07	-0.15351	0.86	0.924	4.60315e-06
Ube2d3	4.57527e-07	0.190164	0.983	0.941	4.76323e-06
Wdr83os	4.61879e-07	0.203575	0.885	0.807	4.78269e-06
Snrpf	4.97262e-07	0.177173	0.989	0.975	5.12153e-06
Maged2	5.10578e-07	0.216	0.991	0.989	5.23071e-06
U2af1	5.78825e-07	0.181633	0.98	0.963	5.89851e-06
Capzb	5.91124e-07	0.196958	0.962	0.918	5.99213e-06
Psma7	6.63356e-07	0.187688	0.992	0.986	6.68913e-06
Psmc4	7.31891e-07	0.196436	0.941	0.892	7.34178e-06
Dbi	7.36759e-07	0.19754	0.976	0.96	7.35232e-06
Cox4i1	7.41762e-07	0.135485	0.997	0.997	7.36409e-06
Tgfb1i1	7.61669e-07	0.241419	0.742	0.626	7.52295e-06
Ap1s1	7.73041e-07	0.203312	0.836	0.714	7.59631e-06
Rraga	7.88378e-07	0.209184	0.798	0.669	7.7077e-06
Akt1	8.23086e-07	0.202826	0.901	0.841	8.00638e-06
Mrpl20	8.59244e-07	0.195352	0.921	0.841	8.3161e-06
Ccdc124	9.0839e-07	0.203573	0.859	0.773	8.71705e-06
Gm7324	9.09723e-07	0.311346	0.314	0.017	8.71705e-06
Hnrnpc	9.45773e-07	0.178669	0.983	0.969	9.01761e-06
Sfpq	1.02511e-06	0.228535	0.971	0.966	9.72589e-06
Cnih1	1.03822e-06	0.205814	0.81	0.739	9.78169e-06
Arf4	1.04115e-06	0.205297	0.977	0.98	9.78169e-06
Ndufb8	1.08717e-06	0.167527	0.992	0.969	1.01645e-05
Mtch1	1.16475e-06	0.194	0.961	0.963	1.08372e-05
Ndufa2	1.20565e-06	0.166931	0.991	0.972	1.11326e-05
Tmem167	1.20943e-06	0.195943	0.938	0.915	1.11326e-05
Slirp	1.21384e-06	0.200856	0.845	0.765	1.11326e-05
Eif4a3	1.29036e-06	0.194748	0.936	0.887	1.17783e-05
Nasp	1.31862e-06	0.237575	0.968	0.969	1.19796e-05
Ppp1r14b	1.39631e-06	0.218502	0.983	0.963	1.26258e-05
Myl9	1.50376e-06	0.282881	0.882	0.83	1.35339e-05
Col26a1	1.55627e-06	0.208732	0.545	0.411	1.39413e-05
Esd	1.57913e-06	0.180604	0.977	0.952	1.40806e-05
Arpc5l	1.59836e-06	0.205045	0.839	0.722	1.41863e-05
Pfn1	1.6264e-06	0.158696	1	0.994	1.4325e-05
Bola2	1.62885e-06	0.196763	0.868	0.785	1.4325e-05
Nol11	1.71106e-06	0.199057	0.657	0.544	1.49796e-05
Hmgb3	1.7587e-06	0.208882	0.979	0.966	1.53115e-05
Mat2a	1.76488e-06	0.207283	0.898	0.847	1.53115e-05
Uqcrq	1.7916e-06	0.192396	0.951	0.929	1.54727e-05
Arpp19	1.79952e-06	0.185772	0.959	0.946	1.54727e-05
Smarce1	1.87588e-06	0.198287	0.944	0.912	1.60576e-05
Ddx39b	1.97799e-06	0.177256	0.983	0.977	1.68567e-05
Kdelr2	1.98704e-06	0.205586	0.909	0.844	1.68592e-05
Aldoa	2.08721e-06	-0.110735	0.971	0.972	1.76314e-05
Trim35	2.21897e-06	0.206406	0.871	0.788	1.86626e-05
Hmgcs1	2.23707e-06	0.261028	0.527	0.402	1.8733e-05
Ube2n	2.29095e-06	0.188591	0.961	0.895	1.91011e-05
Cnn2	2.47076e-06	0.245592	0.941	0.921	2.05116e-05
Gtf3c6	2.59324e-06	0.210028	0.81	0.742	2.1436e-05
Phf5a	2.69539e-06	0.184857	0.956	0.912	2.21851e-05
Son	2.85338e-06	0.172466	0.991	0.98	2.33797e-05
Sqle	2.86481e-06	0.267667	0.335	0.164	2.33797e-05
Mvk	2.92343e-06	0.200541	0.572	0.411	2.37575e-05
Col1a2	2.98106e-06	0.248081	0.983	0.98	2.41241e-05
Hoxc10	3.03655e-06	0.223297	0.832	0.734	2.44703e-05
Cct8	3.08173e-06	0.178271	0.989	0.975	2.47309e-05
Cox6c	3.13201e-06	0.145493	0.998	0.994	2.50301e-05
Hoxa5	3.15598e-06	0.211923	0.428	0.266	2.51174e-05
Akr1a1	3.22398e-06	0.171394	0.988	0.986	2.5553e-05
Pwp1	3.25829e-06	0.196272	0.519	0.377	2.57191e-05
Sh3gl1	3.30132e-06	0.193785	0.678	0.555	2.59524e-05
Apoe	3.42506e-06	0.270725	0.56	0.394	2.68157e-05
Psmb3	3.47979e-06	0.179282	0.965	0.941	2.71339e-05
Eif2s3y	3.66144e-06	0.247959	0.355	0.176	2.84352e-05
Rtn4	3.79121e-06	0.21133	0.933	0.881	2.93248e-05
Ssrp1	3.84759e-06	0.191615	0.973	0.96	2.96418e-05
P4hb	3.87294e-06	0.200665	0.935	0.881	2.97182e-05
Stub1	3.9164e-06	0.178075	0.979	0.96	2.99241e-05
Psma3	3.93084e-06	0.172441	0.991	0.986	2.99241e-05
Ptpn1	4.0226e-06	0.198497	0.659	0.552	3.05021e-05
Ddx5	4.20319e-06	0.166845	0.998	1	3.17465e-05
Atp5g1	4.29921e-06	0.171575	0.992	0.977	3.23163e-05
Taldo1	4.3122e-06	0.187032	0.901	0.841	3.23163e-05
Elob	4.41885e-06	0.147274	0.997	0.997	3.29872e-05
Echs1	4.70506e-06	0.192421	0.895	0.844	3.49882e-05
Ppdpf	4.79041e-06	0.183199	0.927	0.841	3.54859e-05
Kif5b	4.81139e-06	0.188246	0.956	0.895	3.55047e-05
Psmb4	4.8634e-06	0.16703	0.979	0.966	3.57075e-05
Nudc	4.87594e-06	0.173393	0.967	0.969	3.57075e-05
Tmem258	5.16374e-06	0.170044	0.977	0.966	3.76719e-05
H2afz	5.44845e-06	0.172572	1	1	3.95989e-05
Polr2m	5.59556e-06	0.186091	0.989	0.975	4.05152e-05
Fkbp9	5.75336e-06	0.207494	0.759	0.637	4.15018e-05
Lrrc59	6.14735e-06	0.208851	0.781	0.691	4.41783e-05
Canx	6.19374e-06	0.199236	0.898	0.861	4.43463e-05
Ywhae	6.31293e-06	0.152245	0.997	0.992	4.50322e-05
Snrpc	6.51598e-06	0.180237	0.951	0.929	4.63091e-05
Dnm3os	6.63581e-06	0.240815	0.663	0.55	4.69874e-05
Cdc37	6.75315e-06	0.162999	0.983	0.958	4.76431e-05
Sar1a	6.96294e-06	0.20015	0.871	0.785	4.89438e-05
Fos	7.05259e-06	-0.253859	0.763	0.839	4.93938e-05
Arf1	7.1237e-06	0.168082	0.989	0.989	4.97111e-05
Rbm42	7.18323e-06	0.189456	0.727	0.62	4.99455e-05
Pdia4	7.36046e-06	0.199494	0.889	0.836	5.09937e-05
Hist1h2ae	7.45691e-06	0.426955	0.816	0.725	5.14767e-05
Txndc5	7.7444e-06	0.189165	0.882	0.802	5.3158e-05
Wdr43	7.75565e-06	0.208851	0.766	0.694	5.3158e-05
Mdh1	7.96489e-06	0.176591	0.97	0.963	5.43985e-05
Pold2	8.38929e-06	0.191246	0.754	0.64	5.70946e-05
Cdkn1c	8.67575e-06	0.255758	0.991	0.977	5.88362e-05
Tuba1a	8.8538e-06	0.268452	0.98	0.955	5.98331e-05
Psmc3	8.89226e-06	0.173026	0.97	0.943	5.98828e-05
Mlf2	9.16162e-06	0.182919	0.936	0.853	6.13075e-05
Ube2l3	9.16747e-06	0.176705	0.959	0.918	6.13075e-05
Rpl14	9.203e-06	0.108164	1	1	6.13321e-05
Trappc6a	9.55581e-06	-0.12022	0.586	0.663	6.34637e-05
Taf12	9.89038e-06	0.187602	0.605	0.482	6.546e-05
Tra2b	1.01838e-05	0.183398	0.965	0.926	6.71712e-05
Ctbp2	1.06767e-05	0.200188	0.759	0.629	7.0182e-05
Morf4l1	1.07522e-05	0.160049	0.994	0.992	7.04381e-05
Des	1.1355e-05	-0.197785	0.235	0.334	7.40811e-05
Btf3	1.13853e-05	0.126183	1	0.997	7.40811e-05
Rsrc2	1.15559e-05	0.175633	0.973	0.952	7.49386e-05
Acp1	1.15992e-05	0.175546	0.947	0.932	7.49549e-05
Junb	1.16363e-05	-0.211404	0.788	0.83	7.49549e-05
Puf60	1.18257e-05	0.174082	0.947	0.904	7.59212e-05
Rhoa	1.21933e-05	0.171515	0.988	0.98	7.78567e-05
Banf1	1.22081e-05	0.170067	0.976	0.96	7.78567e-05
Mrps24	1.26147e-05	0.176886	0.945	0.895	8.01846e-05
Psmd6	1.43324e-05	0.177817	0.942	0.887	9.08036e-05
Rrbp1	1.44287e-05	0.197687	0.965	0.96	9.1114e-05
Foxd1	1.50838e-05	0.378106	0.615	0.547	9.47963e-05
Arpc1b	1.51103e-05	0.198935	0.964	0.938	9.47963e-05
Marcks	1.55312e-05	0.18266	0.997	0.997	9.71051e-05
AU019823	1.55792e-05	0.181565	0.537	0.397	9.71051e-05
Tubb6	1.62578e-05	0.230177	0.854	0.725	0.000100801
Psmb2	1.62768e-05	0.165515	0.97	0.938	0.000100801
Ndufa5	1.66655e-05	0.163405	0.98	0.96	0.000102878
Itga9	1.68376e-05	0.207541	0.794	0.697	0.000103608
Plk1	1.71017e-05	0.28238	0.627	0.533	0.000104701
Anapc5	1.7124e-05	0.171388	0.97	0.941	0.000104701
Psmd3	1.7815e-05	0.178903	0.859	0.802	0.000108514
Fubp1	1.78603e-05	0.176669	0.965	0.96	0.000108514
Cnot6	1.82478e-05	0.189206	0.78	0.697	0.000110519
Rpl39	1.83106e-05	0.104968	1	1	0.000110553
Hspd1	1.94231e-05	0.190865	0.982	0.946	0.000116902
Copb2	1.96897e-05	0.187789	0.897	0.83	0.000118138
Arhgdia	2.02366e-05	0.17785	0.933	0.907	0.000121043
Ncln	2.05898e-05	0.17849	0.504	0.354	0.000122774
Brix1	2.07848e-05	0.183394	0.81	0.728	0.00012321
Tmed1	2.07909e-05	0.181453	0.772	0.612	0.00012321
Txn2	2.09654e-05	0.186052	0.801	0.725	0.000123863
Sec13	2.10835e-05	0.191359	0.775	0.7	0.00012418
Ifrd1	2.12462e-05	0.188915	0.539	0.405	0.000124562
Ddb1	2.12778e-05	0.187147	0.819	0.748	0.000124562
Nol12	2.13586e-05	0.180583	0.634	0.513	0.000124657
mt-Nd1	2.23053e-05	0.152966	0.989	0.986	0.000129789
Tipin	2.24023e-05	0.211532	0.836	0.771	0.00012996
Utp18	2.26321e-05	0.184203	0.517	0.391	0.000130899
Ccdc85b	2.33196e-05	0.188022	0.551	0.436	0.000134472
Ddost	2.40326e-05	0.163743	0.973	0.96	0.00013813
Mthfd2	2.40975e-05	0.202907	0.454	0.334	0.00013813
Apex1	2.44405e-05	0.193797	0.818	0.762	0.000139681
Sparc	2.49526e-05	0.213415	0.989	0.972	0.000142185
Bnip3	2.5059e-05	-0.149721	0.3	0.397	0.00014237
Limd2	2.58023e-05	0.190499	0.833	0.737	0.000146162
Nono	2.83589e-05	0.160059	0.982	0.969	0.000160174
Ewsr1	2.84573e-05	0.182011	0.958	0.918	0.00016026
Ppa1	2.92963e-05	0.193346	0.821	0.771	0.000164504
Nrbp1	2.97716e-05	0.188284	0.778	0.674	0.000166687
Dnttip2	3.02588e-05	0.177517	0.838	0.739	0.000168923
Nt5dc2	3.06067e-05	0.162983	0.976	0.958	0.000170371
Blmh	3.09455e-05	0.178614	0.895	0.836	0.000171761
Rac1	3.18008e-05	0.167018	0.967	0.924	0.000176001
Mrfap1	3.26039e-05	0.144466	0.997	0.997	0.000179928
Smim7	3.26996e-05	0.184475	0.844	0.731	0.000179941
Sf3b5	3.35111e-05	0.173759	0.945	0.924	0.000183738
Slc25a5	3.35803e-05	0.223163	0.939	0.946	0.000183738
Cops6	3.54292e-05	0.166141	0.964	0.929	0.000193305
Ccdc8	3.59294e-05	-0.133707	0.273	0.416	0.00019548
Hnrnpk	3.66582e-05	0.150067	0.995	0.992	0.000198884
Ctnnb1	3.76378e-05	0.17284	0.98	0.952	0.000203625
Top1	3.78374e-05	0.161982	0.998	0.98	0.000204131
Hdac3	4.02571e-05	0.180117	0.744	0.623	0.000216578
Oaf	4.07477e-05	0.200165	0.789	0.697	0.000218607
Spcs2	4.11044e-05	0.159744	0.976	0.958	0.000219328
Yipf5	4.11097e-05	0.181961	0.75	0.615	0.000219328
Scd2	4.23443e-05	0.19114	0.781	0.669	0.00022529
Surf4	4.30902e-05	0.180874	0.715	0.598	0.000228627
Fbxl7	4.33798e-05	0.22056	0.747	0.652	0.000229532
Rbmx	4.36498e-05	0.194087	0.781	0.725	0.000230327
Kpnb1	4.39831e-05	0.179815	0.856	0.765	0.000231452
Myl12a	4.46048e-05	0.152064	0.995	0.972	0.000234084
Sem1	4.53414e-05	0.14311	0.997	0.989	0.000237303
Ssna1	4.58191e-05	0.174766	0.895	0.799	0.000238421
Psma4	4.60576e-05	0.158016	0.983	0.963	0.000238421
Tceal8	4.61443e-05	0.181807	0.891	0.853	0.000238421
Tcp1	4.61938e-05	0.155437	0.983	0.972	0.000238421
Trip11	4.62948e-05	0.187621	0.554	0.439	0.000238421
Chordc1	4.62978e-05	0.179486	0.663	0.521	0.000238421
Tmem234	4.72858e-05	0.171884	0.907	0.847	0.000242331
Ckap4	4.73086e-05	0.185574	0.951	0.904	0.000242331
Bex3	4.80288e-05	0.148838	0.997	0.992	0.000244711
Tia1	4.80915e-05	0.177235	0.859	0.813	0.000244711
Pofut2	4.81545e-05	0.180825	0.721	0.606	0.000244711
Pfdn1	4.98033e-05	0.165183	0.926	0.887	0.000252424
Smarca4	5.04155e-05	0.179341	0.785	0.731	0.000254489
Dda1	5.06021e-05	0.175775	0.649	0.53	0.000254489
Mpdu1	5.0607e-05	0.179025	0.612	0.493	0.000254489
Tsn	5.09034e-05	0.163924	0.954	0.955	0.000255313
Sox4	5.5647e-05	0.199315	0.961	0.935	0.00027838
Egr1	5.84616e-05	-0.138721	0.838	0.89	0.000291702
Slc25a3	5.86993e-05	0.142024	0.992	0.986	0.000292132
Tbcb	5.91264e-05	0.167894	0.904	0.856	0.000293499
Tpm1	6.17404e-05	0.219042	0.912	0.89	0.00030505
Hint1	6.17702e-05	0.128292	0.998	0.994	0.00030505
Tex30	6.45203e-05	0.175208	0.563	0.45	0.000317816
Cct3	6.56105e-05	0.165898	0.976	0.955	0.000322362
Snrpa1	6.70427e-05	0.174287	0.939	0.881	0.000328561
Vps36	6.73719e-05	0.173312	0.797	0.691	0.000329336
Anxa5	6.85288e-05	0.190514	0.965	0.938	0.000334143
Papola	6.93161e-05	0.168791	0.903	0.841	0.000337128
Smarcd2	6.99889e-05	0.170399	0.59	0.462	0.000339543
Tcf12	7.01719e-05	0.191269	0.813	0.725	0.000339576
Hspbp1	7.09097e-05	0.173517	0.42	0.292	0.000342286
Pmf1	7.23661e-05	0.173517	0.815	0.734	0.000348443
Hook3	7.33094e-05	0.183166	0.73	0.643	0.000352104
Sfrp1	7.42943e-05	0.245515	0.917	0.89	0.000355947
Prdx6	7.48816e-05	0.188408	0.918	0.881	0.000357871
Pin1	7.52368e-05	0.168631	0.9	0.813	0.000358678
Ybx3	7.61799e-05	0.188162	0.93	0.892	0.000360912
Bloc1s2	7.62407e-05	0.166073	0.52	0.354	0.000360912
Mri1	7.6294e-05	0.17185	0.475	0.346	0.000360912
Ubl5	7.64549e-05	0.159199	0.977	0.926	0.000360912
Hoxd11	7.76155e-05	0.205939	0.88	0.85	0.000365495
Psma2	7.79015e-05	0.153601	0.976	0.975	0.000365947
Cct5	7.86709e-05	0.148015	0.995	0.977	0.000368662
Fkbp4	7.94733e-05	0.169339	0.967	0.935	0.000371518
Srrt	8.12597e-05	0.186675	0.778	0.691	0.00037895
Snrnp70	8.16878e-05	0.158887	0.976	0.963	0.000380026
Arpc4	8.21742e-05	0.173445	0.731	0.629	0.000381368
Zcchc17	8.39495e-05	0.172076	0.809	0.705	0.00038867
Pa2g4	8.60347e-05	0.171723	0.947	0.892	0.000397369
Col3a1	8.77944e-05	0.200494	0.988	0.983	0.000404526
Ppp1r11	8.83739e-05	0.16855	0.812	0.773	0.000406225
Siva1	8.94454e-05	0.168611	0.974	0.958	0.000409678
Serf2	8.95506e-05	0.129737	0.998	0.997	0.000409678
Tomm7	9.02572e-05	0.155298	0.982	0.958	0.000411932
Phc2	9.19428e-05	0.172983	0.672	0.541	0.000418633
Luc7l3	9.23235e-05	0.171021	0.926	0.901	0.000419375
Ssu72	9.38442e-05	0.179787	0.822	0.737	0.00042528
Dbn1	9.43583e-05	0.180117	0.742	0.626	0.000426606
Kcnj8	9.47451e-05	-0.203187	0.493	0.646	0.000427351
Msl1	9.55059e-05	0.165239	0.618	0.507	0.000429777
Psmb1	9.5857e-05	0.142562	0.988	0.983	0.000430021
Mtch2	9.60067e-05	0.171407	0.8	0.728	0.000430021
Stip1	9.64366e-05	0.180117	0.851	0.799	0.000430944
Tecr	0.00010151	0.164659	0.947	0.926	0.000452566
Ash2l	0.000101965	0.167818	0.795	0.666	0.000453546
Lmnb1	0.000102835	0.208582	0.989	0.977	0.000456062
Kansl2	0.000103005	0.166435	0.604	0.524	0.000456062
Trim28	0.000105148	0.160556	0.939	0.895	0.000464483
G3bp2	0.000105849	0.169147	0.827	0.765	0.000466511
Dhx15	0.000106641	0.169279	0.86	0.776	0.000468928
Fbxo22	0.00011564	0.166282	0.671	0.547	0.000507343
Anp32a	0.000118006	0.14758	0.994	0.983	0.000516543
Ptch1	0.000118455	0.206181	0.461	0.382	0.000517332
Ccar1	0.000118911	0.176416	0.917	0.858	0.00051815
Rex1bd	0.000120275	0.163014	0.939	0.875	0.000522909
Txndc9	0.000127466	0.174413	0.821	0.714	0.000552616
Vcan	0.000127681	0.215495	0.653	0.572	0.000552616
Arl2bp	0.000128904	0.170373	0.747	0.643	0.000556657
Sec11a	0.000130029	0.160167	0.932	0.878	0.000559894
Mbd3	0.000130235	0.15666	0.976	0.955	0.000559894
Rrs1	0.000130554	0.173953	0.429	0.326	0.000560016
Tsix	0.00013404	-0.183226	0.176	0.3	0.000572695
Rpap3	0.000134105	0.164511	0.572	0.462	0.000572695
Rnf187	0.000136721	0.163579	0.93	0.85	0.000582514
Wdr1	0.000137147	0.178739	0.692	0.578	0.000582514
Carnmt1	0.000137311	0.165831	0.839	0.756	0.000582514
Phb2	0.000138412	0.157128	0.965	0.96	0.000585894
Ubqln2	0.000139014	0.173083	0.612	0.507	0.000587151
Fam212a	0.00014499	0.182376	0.731	0.669	0.000611052
Selenof	0.000146497	0.145499	0.985	0.972	0.000616053
Wdr89	0.000149839	-0.100952	0.501	0.555	0.000628737
Gdi2	0.000151326	0.153672	0.974	0.955	0.000633594
Med19	0.000156397	0.166205	0.662	0.561	0.000652659
Srsf6	0.000156557	0.168009	0.93	0.892	0.000652659
Ppig	0.000158049	0.156943	0.951	0.932	0.000657456
G3bp1	0.000158557	0.161818	0.977	0.958	0.000657493
Gria4	0.00015874	-0.122335	0.53	0.569	0.000657493
Commd7	0.000160969	0.174252	0.659	0.603	0.000665293
Rbm8a	0.00017118	0.159069	0.97	0.943	0.00070598
Ska3	0.000172923	0.175345	0.439	0.312	0.000711643
Gorasp2	0.000177135	0.16963	0.602	0.462	0.000727423
Ncapg	0.000181261	0.194527	0.677	0.586	0.000742783
Vti1b	0.000191849	0.158309	0.596	0.467	0.000784505
Gucy1b1	0.000192602	-0.118506	0.686	0.739	0.000785915
Ptov1	0.000193188	0.141044	0.985	0.989	0.000786637
Ppp2ca	0.000196013	0.156946	0.967	0.966	0.000796456
Yae1d1	0.000198021	0.17747	0.649	0.569	0.000801815
Nhp2	0.000198472	0.190212	0.842	0.768	0.000801815
Tomm70a	0.000199024	0.165049	0.618	0.538	0.000801815
Cct4	0.000199494	0.149274	0.979	0.949	0.000801815
Thoc3	0.000199509	0.164786	0.827	0.771	0.000801815
Skp1a	0.000199829	0.160518	0.915	0.85	0.000801815
Hmgn3	0.000200509	-0.115767	0.836	0.892	0.00080287
Ankrd37	0.000201337	-0.16462	0.185	0.306	0.000804513
Morf4l2	0.000203982	0.17161	0.979	0.963	0.000813395
Nt5c3b	0.000205341	0.16471	0.701	0.598	0.00081712
Selenoh	0.000207	0.154491	0.992	0.986	0.000822026
Aco2	0.000210419	0.16478	0.833	0.745	0.000833882
Lsm6	0.000211221	0.154982	0.962	0.926	0.000835341
Anp32b	0.000216697	0.137116	0.998	1	0.000853554
Lman2	0.000216712	0.161421	0.803	0.7	0.000853554
Ppp1cc	0.000217902	0.158092	0.965	0.952	0.000854262
Peg3	0.000218132	0.231751	0.926	0.887	0.000854262
Serp1	0.000218374	0.170088	0.715	0.615	0.000854262
C1qtnf2	0.00021907	0.203971	0.366	0.261	0.000854262
H3f3a	0.00021911	0.111385	1	1	0.000854262
Aifm1	0.000230591	0.16077	0.736	0.626	0.000897208
Ncbp2	0.000232019	0.167036	0.819	0.722	0.000900946
Ccdc59	0.000233021	0.160439	0.829	0.751	0.000903014
Psmc1	0.000235222	0.16908	0.882	0.802	0.000909715
Fdft1	0.00023814	0.18839	0.367	0.227	0.000919155
Ddx18	0.000238804	0.167401	0.807	0.728	0.000919872
Eftud2	0.000241619	0.160213	0.678	0.564	0.000928857
Ftl1	0.000243601	0.126091	1	1	0.000934205
Vgll4	0.000244402	0.16938	0.771	0.68	0.000934205
Sfswap	0.000244465	0.157062	0.574	0.419	0.000934205
Ranbp1	0.000245219	0.166	0.989	0.986	0.000935232
Dazap1	0.000247415	0.161448	0.918	0.901	0.00094174
Cdc16	0.000250155	0.162647	0.825	0.788	0.000950293
Mrpl55	0.000258646	0.159071	0.587	0.47	0.000980299
Ube2i	0.000259072	0.137388	0.989	0.975	0.000980299
Srm	0.000262161	0.207183	0.724	0.64	0.000989386
Fkbp3	0.000262501	0.148869	0.979	0.958	0.000989386
Sf3a3	0.000263989	0.158905	0.856	0.813	0.000993051
Evl	0.000265064	0.159567	0.781	0.666	0.000995153
Arl1	0.000265857	0.16022	0.945	0.898	0.000996187
Rfc3	0.000268601	0.188633	0.819	0.739	0.00100451
Pgp	0.000271536	0.173072	0.839	0.839	0.00101352
Mrpl3	0.000277423	0.15737	0.698	0.569	0.0010335
Psma5	0.00028077	0.148586	0.968	0.946	0.00104395
Tsc22d1	0.00028137	0.163344	0.92	0.898	0.00104416
Smarcb1	0.000283602	0.157771	0.901	0.816	0.00105042
Pbx1	0.000285813	0.186702	0.979	0.975	0.00105658
Mrpl48	0.000287053	0.160505	0.768	0.652	0.00105913
Mrpl27	0.000292455	0.159667	0.648	0.547	0.001077
Smo	0.000294586	0.165416	0.809	0.737	0.00108277
Ubb	0.000295718	0.142043	1	1	0.00108486
Matr3	0.000298009	0.158446	0.935	0.924	0.00109119
Ube2k	0.000301773	0.159759	0.926	0.89	0.00110287
Ywhab	0.000304742	0.157263	0.968	0.941	0.00111161
Prelid1	0.000306013	0.148545	0.983	0.96	0.00111414
Abcc9	0.000311857	-0.152785	0.256	0.337	0.00113203
Alkbh1	0.000312102	0.170627	0.616	0.524	0.00113203
Elof1	0.000322198	0.160454	0.9	0.844	0.00116645
Csnk2b	0.000327468	0.160232	0.923	0.841	0.00118331
Luc7l	0.000334027	0.159863	0.693	0.555	0.00120475
Nedd8	0.00033666	0.13817	0.991	0.977	0.00121198
Eif3j2	0.000340352	-0.121152	0.299	0.408	0.00122298
Mrps7	0.000344238	0.153967	0.877	0.805	0.00123464
Tmem256	0.00034512	0.149828	0.953	0.949	0.00123551
Mrpl42	0.000350698	0.147524	0.958	0.918	0.00125314
Mcrip1	0.000355491	0.153128	0.929	0.887	0.00126792
Rcc2	0.000357861	0.170086	0.762	0.705	0.00127401
Atox1	0.000361319	0.156324	0.914	0.867	0.00128395
Smim12	0.000371615	0.151308	0.476	0.368	0.0013181
Ndufa4l2	0.000376612	-0.208178	0.455	0.561	0.00133337
Timm17b	0.000377985	0.154891	0.883	0.819	0.00133578
Copz1	0.000379651	0.163031	0.677	0.555	0.00133921
Emc6	0.000386118	0.157445	0.827	0.762	0.00135953
Pmvk	0.000390776	0.154731	0.539	0.388	0.00137123
Mdh2	0.000390865	0.153117	0.962	0.949	0.00137123
Psat1	0.000392222	0.161807	0.543	0.394	0.00137349
Tubb5	0.000393628	0.16853	1	1	0.00137483
Cpxm1	0.000394033	0.170464	0.678	0.603	0.00137483
Etf1	0.000409657	0.16332	0.674	0.601	0.00142651
Cmtm3	0.000410325	0.16445	0.716	0.589	0.00142651
Rab24	0.000411786	0.155453	0.748	0.618	0.00142901
Creb3l1	0.000416985	0.170255	0.457	0.337	0.00144445
Jpt2	0.000430052	0.156975	0.463	0.312	0.00148704
Ahsa2	0.000433626	0.151664	0.586	0.462	0.00149671
Tmed10	0.000439568	0.143338	0.976	0.969	0.0015145
Cacybp	0.000452757	0.170163	0.958	0.955	0.00155716
Eif4h	0.000456649	0.150856	0.973	0.926	0.00156775
Nagk	0.000457708	0.157536	0.524	0.382	0.00156859
Fbl	0.000459595	0.164321	0.886	0.875	0.00157226
Fbln5	0.000477157	0.196195	0.73	0.64	0.00162944
Psmc2	0.000479003	0.152612	0.933	0.884	0.00163285
Hist1h3c	0.000484066	0.18805	0.464	0.326	0.00164719
Cops3	0.000486521	0.154645	0.862	0.788	0.00165263
Tomm40	0.000494436	0.162783	0.838	0.793	0.00167655
Copg1	0.000502705	0.156907	0.745	0.694	0.0017016
Nudt16l1	0.000506758	0.146945	0.505	0.388	0.00171231
Tshz2	0.000514715	0.180315	0.923	0.884	0.001735
Aes	0.000515772	0.182238	0.8	0.705	0.001735
Tomm5	0.000516177	0.154876	0.888	0.816	0.001735
Sar1b	0.000518237	0.153906	0.695	0.635	0.00173625
Sumo2	0.000518962	0.123504	0.998	0.994	0.00173625
Tmem121	0.000519254	0.157663	0.508	0.371	0.00173625
2022-09-04	0.00052226	-0.155975	0.253	0.334	0.00174328
Sec23a	0.00052927	0.152116	0.454	0.348	0.00176076
Pnn	0.000529325	0.171785	0.942	0.924	0.00176076
Triap1	0.000546833	0.149798	0.499	0.388	0.00181586
Smarcd3	0.000551614	0.148784	0.475	0.351	0.00182859
Gmpr2	0.000557118	0.148362	0.513	0.391	0.00184366
Uqcr10	0.000559052	0.140262	0.982	0.972	0.00184689
Prmt5	0.000563163	0.150283	0.473	0.326	0.00185728
Flna	0.000567183	0.171898	0.944	0.915	0.00186734
Far1	0.000573587	0.146565	0.486	0.365	0.00188074
Pdcd10	0.000573944	0.154515	0.768	0.705	0.00188074
Ctxn1	0.000574182	0.157968	0.687	0.598	0.00188074
Uqcc2	0.000577034	0.157376	0.948	0.949	0.00188687
Hnrnpf	0.000579424	0.135867	0.998	0.994	0.00189148
Cbx1	0.000590927	0.144612	0.989	0.986	0.00192576
Ss18	0.00062077	0.154818	0.728	0.609	0.0020196
Orc6	0.000633084	0.16881	0.757	0.705	0.00205619
Ccnd2	0.000637624	0.206949	0.926	0.918	0.00206745
Rab1a	0.000640044	0.1519	0.778	0.68	0.00207181
Farsb	0.000653412	0.1504	0.555	0.456	0.00211153
Fxyd2	0.000669885	-0.114157	0.234	0.414	0.00216105
Dynll2	0.000671193	0.154687	0.833	0.742	0.00216105
Rpl36a	0.000672101	0.100656	1	0.997	0.00216105
Adsl	0.00067423	0.147811	0.52	0.385	0.00216428
Fh1	0.000678225	0.15547	0.841	0.762	0.00217348
Zyx	0.000681553	0.156768	0.572	0.462	0.00218052
Aurkaip1	0.000683685	0.148062	0.932	0.881	0.00218371
Mfap4	0.000701426	0.19077	0.83	0.81	0.00223297
Mettl1	0.000701427	0.167627	0.64	0.518	0.00223297
Ggnbp2	0.000702684	0.157261	0.7	0.592	0.00223328
Eif4e2	0.000705855	0.145084	0.938	0.875	0.00223967
Slc35b1	0.000716688	0.148047	0.605	0.467	0.0022703
Psma6	0.000728655	0.146346	0.956	0.918	0.00230422
Srp9	0.000729791	0.140499	0.962	0.949	0.00230422
Nxn	0.000731496	0.154989	0.646	0.521	0.00230583
Drg1	0.000743765	0.149504	0.785	0.694	0.00234067
Hdgfl2	0.000746837	0.150809	0.775	0.714	0.0023465
Txnl1	0.00075128	0.13785	0.973	0.963	0.00235662
Ndufa1	0.000755531	0.150082	0.853	0.79	0.0023661
Eif3c	0.000760382	0.134375	0.97	0.958	0.00237743
Dtd1	0.000762754	0.157943	0.564	0.462	0.00238098
Hspe1	0.00076909	0.144139	0.989	0.986	0.00239687
Smu1	0.000777191	0.1507	0.788	0.7	0.00241821
Ccdc102a	0.000788555	0.147392	0.656	0.521	0.00244961
Rpl7l1	0.000793351	0.148107	0.88	0.822	0.00245728
Commd2	0.000793964	0.149399	0.662	0.572	0.00245728
Lgals1	0.000794851	0.173968	0.997	0.992	0.00245728
Ralgps2	0.000800469	0.156156	0.627	0.499	0.00247068
Prpf31	0.000806554	0.149354	0.715	0.606	0.00248548
Ptpa	0.000830514	0.148356	0.656	0.561	0.00255522
Anapc15	0.000833905	0.158277	0.621	0.496	0.00255852
Ctsd	0.000834241	0.150207	0.747	0.677	0.00255852
Traf4	0.000838652	0.15649	0.721	0.629	0.00256796
Med10	0.000843698	0.148265	0.689	0.572	0.00257931
Cuedc1	0.000847085	0.152975	0.581	0.513	0.00258556
Bgn	0.000859751	0.193603	0.883	0.836	0.00262006
Srp19	0.000870669	0.150529	0.897	0.864	0.00264881
Hist2h2aa1	0.000871934	0.202423	0.299	0.156	0.00264881
Poldip2	0.000875688	0.146819	0.701	0.601	0.00265279
Rtf1	0.000875998	0.14376	0.941	0.918	0.00265279
Kdelr1	0.000890421	0.149116	0.914	0.878	0.00269223
Med8	0.000902992	0.146721	0.646	0.603	0.00272596
Atf5	0.000909381	0.154714	0.422	0.3	0.00274095
Tbpl1	0.000924329	0.152812	0.566	0.482	0.00278165
Cdc26	0.000941481	0.146206	0.904	0.847	0.00282885
Fam133b	0.000946889	0.152598	0.838	0.779	0.00284067
Cdc42	0.000953589	0.135967	0.997	0.989	0.00285632
Hist1h3b	0.000960752	0.170207	0.381	0.272	0.0028733
Snx3	0.000963264	0.141322	0.964	0.946	0.00287635
Galnt1	0.000977763	0.151657	0.645	0.538	0.00291464
Ap2m1	0.000979995	0.146543	0.923	0.87	0.00291464
Ubtf	0.000980738	0.163536	0.851	0.819	0.00291464
Bmp1	0.000982139	0.14322	0.648	0.521	0.00291464
Git2	0.000992582	0.159462	0.536	0.448	0.0029411
Tax1bp3	0.000996301	0.152118	0.745	0.629	0.00294758
Kctd20	0.00100087	0.144257	0.458	0.34	0.00295554
Tubb2a	0.00100206	0.176357	0.517	0.385	0.00295554
Rab11b	0.00101282	0.149466	0.845	0.768	0.00298012
Rab1b	0.00101349	0.144839	0.636	0.535	0.00298012
Mrps15	0.00101996	0.147021	0.833	0.796	0.00299457
Dlk1	0.00102402	0.317584	0.56	0.436	0.00300193
Eif1a	0.00102757	0.158466	0.695	0.62	0.00300775
Dnajc25	0.00104482	0.14615	0.429	0.32	0.00305197
Psma1	0.00104731	0.142865	0.917	0.895	0.00305197
Slc25a17	0.00104743	0.144761	0.621	0.504	0.00305197
Med30	0.00105191	0.143701	0.539	0.414	0.00306039
Oxct1	0.00106064	0.144197	0.971	0.952	0.00308114
Cops4	0.00107997	0.142941	0.917	0.853	0.00313257
Zc3h15	0.00108497	0.14534	0.964	0.949	0.00314093
Pycrl	0.00108819	0.147112	0.654	0.564	0.00314093
Hdlbp	0.00108884	0.161842	0.918	0.864	0.00314093
Ntm	0.00108938	0.188544	0.478	0.382	0.00314093
Ndufb9	0.00109873	0.12653	0.983	0.983	0.00316058
Tmem109	0.00109948	0.143267	0.659	0.541	0.00316058
Atp5c1	0.00111457	0.121966	0.997	0.992	0.00319919
Ythdf1	0.00111866	0.144998	0.601	0.487	0.00320615
Denr	0.00113888	0.143777	0.93	0.875	0.00325927
Hnrnpa1	0.00114215	0.136413	0.998	0.997	0.00326376
4933404O12Rik	0.00114474	0.221545	0.276	0.071	0.00326632
Bnip2	0.00115012	0.151566	0.829	0.759	0.00327681
Zfp157	0.00115549	-0.103197	0.287	0.348	0.00328705
Fam49b	0.00115789	0.149087	0.432	0.278	0.00328705
Cs	0.00115883	0.143859	0.621	0.479	0.00328705
Col5a2	0.00116637	0.175879	0.771	0.7	0.00330356
Arhgdib	0.00117996	0.165608	0.42	0.295	0.00333715
Mmadhc	0.00119197	0.143398	0.637	0.518	0.00336619
Rangap1	0.00120698	0.183718	0.765	0.697	0.00340358
Mrpl11	0.00121291	0.144544	0.812	0.708	0.00341529
Skp2	0.00122222	0.157373	0.683	0.572	0.00343648
Ctps	0.00122527	0.157103	0.656	0.547	0.00344005
Emc8	0.00122737	0.145005	0.836	0.802	0.00344093
Ddx39	0.00123476	0.171298	0.795	0.731	0.00345662
Zfp207	0.00123773	0.144463	0.844	0.779	0.00345991
Rwdd1	0.00125426	0.14044	0.948	0.935	0.00350102
Sgta	0.00126784	0.150032	0.822	0.762	0.0035338
Lta4h	0.00127543	0.143425	0.651	0.541	0.00354983
Top2b	0.00129558	0.170552	0.901	0.844	0.00360071
Pmpca	0.00129966	0.140108	0.563	0.431	0.0036029
Kpna2	0.00130011	0.235798	0.531	0.419	0.0036029
Ppwd1	0.00131488	0.145019	0.677	0.575	0.00363858
Sumf2	0.00132192	0.13881	0.46	0.309	0.00365282
Hoxc9	0.00133895	0.160365	0.666	0.567	0.00369458
Mars	0.00135365	0.146213	0.507	0.433	0.00372981
Grb10	0.00136124	0.151172	0.932	0.89	0.00374536
Hist1h3e	0.00137395	0.167611	0.464	0.365	0.00377493
Gnas	0.00138701	0.120335	1	0.994	0.00380537
Mthfd2l	0.00139267	0.141651	0.483	0.357	0.00381549
Mcfd2	0.00140301	0.141212	0.466	0.36	0.00383836
Gltp	0.00140658	-0.124332	0.203	0.312	0.00384265
Mrpl58	0.00143455	0.142794	0.877	0.81	0.00391352
Ssr1	0.00143825	0.147155	0.857	0.793	0.00391806
Elavl1	0.00144399	0.148726	0.869	0.839	0.00392641
2410004B18Rik	0.00144539	0.142124	0.601	0.47	0.00392641
Elovl1	0.0014592	0.14042	0.44	0.326	0.00395834
Eno1	0.00146724	0.152485	0.988	0.989	0.00397454
Psmd4	0.0014698	0.1432	0.927	0.915	0.0039759
Gmnn	0.00147663	0.168847	0.866	0.745	0.00398876
Hnrnpa0	0.0014991	0.131376	0.991	0.989	0.00404378
Cdc5l	0.001503	0.151155	0.853	0.785	0.00404865
Enho	0.00150846	0.162527	0.385	0.286	0.00405767
Slc1a5	0.00153654	0.209218	0.276	0.088	0.00412743
Aprt	0.00153963	0.178625	0.895	0.898	0.00412999
Sdf2l1	0.00154287	0.146759	0.464	0.354	0.00413291
Mis12	0.00155009	0.140964	0.543	0.431	0.00414649
Myo6	0.00155436	-0.110514	0.284	0.351	0.00415214
Cdk7	0.00156222	0.142643	0.571	0.47	0.00416737
Ndufs6	0.00156457	0.141162	0.92	0.878	0.00416786
Hsph1	0.00156818	0.152506	0.416	0.337	0.00417168
Sec62	0.00157034	0.136601	0.985	0.969	0.00417168
Dctn2	0.00157964	0.143525	0.9	0.822	0.00419063
Mea1	0.00158332	0.141329	0.568	0.493	0.00419461
Alyref	0.00161156	0.144205	0.956	0.932	0.00426356
Anapc10	0.00161499	0.139843	0.492	0.411	0.00426525
Hmga2	0.00161663	0.160309	0.48	0.351	0.00426525
Eif6	0.00162016	0.142645	0.841	0.79	0.0042687
Csrp1	0.00163245	0.161833	0.874	0.79	0.00429521
Stt3a	0.00163849	0.143117	0.566	0.479	0.00430524
Mrpl15	0.00164847	0.141607	0.856	0.79	0.00432555
Dph3	0.00165842	0.151847	0.78	0.669	0.00434575
Zfp322a	0.00167923	0.140181	0.592	0.473	0.00439428
Eif3a	0.00168753	0.145195	0.98	0.983	0.00441003
Ndn	0.00169286	0.173081	0.769	0.694	0.00441796
Nup43	0.00169813	0.138732	0.63	0.53	0.00442572
Hoxa9	0.00173675	0.161193	0.715	0.669	0.00452024
Naa10	0.00174308	0.143793	0.76	0.688	0.00453059
Pcna	0.00175548	0.161106	0.543	0.448	0.00455666
Usp14	0.00176559	0.146307	0.819	0.771	0.00457676
Ube2v2	0.00177098	0.143333	0.853	0.776	0.00458456
Nans	0.00177723	0.145901	0.713	0.643	0.00459321
Xpnpep1	0.00177909	0.14429	0.724	0.632	0.00459321
Nmd3	0.00179223	0.141454	0.557	0.422	0.00462067
Jmjd6	0.00179453	0.140177	0.683	0.555	0.00462067
Tlnrd1	0.00181608	0.138289	0.432	0.317	0.00466987
Swi5	0.00181849	0.126093	0.991	0.983	0.00466987
Usf1	0.00182535	0.135178	0.484	0.365	0.00468126
Atp5o.1	0.00183566	0.119454	0.995	0.992	0.00470144
Kif2c	0.0018611	0.176659	0.572	0.504	0.00476026
Nfib	0.00186858	0.163404	0.85	0.762	0.00477305
Cdk1	0.00187177	0.20464	0.935	0.929	0.00477488
Ift20	0.00187615	0.148722	0.865	0.79	0.00477827
Gpx7	0.00187806	0.145905	0.642	0.547	0.00477827
Ptrh2	0.00189215	0.141212	0.624	0.513	0.00480775
Gtpbp4	0.00193332	0.162285	0.716	0.66	0.0049059
Aurka	0.00194625	0.231921	0.574	0.501	0.00493221
Mrpl43	0.00195623	0.139283	0.822	0.751	0.00495099
Flywch1	0.00196873	0.135497	0.53	0.419	0.00497607
Yeats4	0.00198413	0.140804	0.825	0.717	0.00500844
Eif3d	0.00198742	0.138464	0.932	0.881	0.00500862
Eif4g2	0.0019894	0.147689	0.989	0.98	0.00500862
Cwc15	0.00199932	0.142675	0.926	0.892	0.005027
Meg3	0.0020168	0.237848	0.851	0.785	0.00506435
2310011J03Rik	0.00202135	0.135129	0.49	0.38	0.00506916
Racgap1	0.00203372	0.188851	0.801	0.731	0.00509356
Prmt1	0.0020769	0.137161	0.992	0.986	0.00519495
Shkbp1	0.00209318	0.140659	0.431	0.306	0.00522888
Tmem14c	0.0020964	0.15701	0.857	0.782	0.00523014
Cbfb	0.00210459	0.139256	0.566	0.47	0.00524378
2410089E03Rik	0.00215176	0.143157	0.373	0.232	0.00535438
Lactb	0.0021632	0.149273	0.361	0.227	0.0053759
Smim27	0.00217895	0.137511	0.48	0.382	0.00540806
Sdhb	0.00219697	0.140989	0.936	0.898	0.00544576
Srsf10	0.00220656	0.139718	0.95	0.898	0.00546252
Rnf26	0.00223137	0.16022	0.675	0.575	0.00551685
Cdv3	0.00223844	0.139774	0.939	0.907	0.00552723
Cyp51	0.00224886	0.172197	0.364	0.28	0.00554584
Dzip3	0.0022546	0.140792	0.627	0.518	0.00554719
Prkar1a	0.00225517	0.139843	0.964	0.949	0.00554719
Slc39a7	0.00228319	0.142712	0.715	0.615	0.00560013
Stard3nl	0.00228531	0.140424	0.687	0.595	0.00560013
Cks1b	0.00228751	0.150576	0.991	0.975	0.00560013
Ube2d2a	0.00228832	0.136504	0.915	0.887	0.00560013
Dpf2	0.00230949	0.132585	0.542	0.416	0.00564477
Mcl1	0.00234339	0.144015	0.909	0.87	0.00572037
Nfyb	0.00236203	0.149316	0.742	0.714	0.00575858
Aldh1a2	0.00239331	0.251507	0.794	0.762	0.00582745
Eif3g	0.00239746	0.141563	0.897	0.878	0.00583019
Phrf1	0.00241739	0.135858	0.478	0.368	0.00587124
Nelfcd	0.00244148	0.137704	0.712	0.603	0.00592227
S100a11	0.00246287	0.142639	0.985	0.975	0.0059634
Hmg20b	0.00246463	0.142394	0.816	0.759	0.0059634
Ndufb10	0.0024714	0.132955	0.974	0.941	0.00597229
Atp5d	0.00247538	0.116704	0.992	1	0.00597442
Nudt1	0.00248189	0.132697	0.534	0.419	0.00598264
Cirbp	0.00248641	0.143855	0.772	0.657	0.00598602
Cdca4	0.0025026	0.142305	0.593	0.49	0.00601272
Nxt1	0.00250374	0.14074	0.786	0.703	0.00601272
Polr2e	0.00250914	0.134654	0.921	0.895	0.00601819
Ccdc88a	0.0025181	0.152303	0.894	0.822	0.00603217
Ipo9	0.00252785	0.1411	0.578	0.504	0.006048
9530068E07Rik	0.00255075	0.141662	0.771	0.671	0.00609521
Gars	0.00256571	0.139881	0.713	0.589	0.00612336
Nhs	0.00257333	0.146904	0.398	0.275	0.00613395
Memo1	0.00258177	0.132697	0.51	0.459	0.00613995
Mgat2	0.00258222	0.14423	0.715	0.62	0.00613995
Nes	0.00258614	0.149594	0.499	0.38	0.00614168
Ythdf2	0.00261043	0.137885	0.693	0.544	0.00619174
Mtap	0.00262894	0.14375	0.672	0.592	0.00622219
Actr3	0.00262973	0.152445	0.936	0.921	0.00622219
Krtcap2	0.00263542	0.132776	0.977	0.932	0.006228
Eef1g	0.00264735	0.112896	0.998	0.994	0.00624853
Acta2	0.00266678	0.250042	0.865	0.779	0.00628668
Rpn1	0.00269707	0.14476	0.844	0.79	0.00634372
Manbal	0.00269756	0.133775	0.64	0.544	0.00634372
Sccpdh	0.00270985	0.134389	0.522	0.419	0.00636483
Nsfl1c	0.00272058	0.135734	0.818	0.739	0.00638225
Hist1h4i	0.00272655	0.165898	0.542	0.382	0.00638849
Sema6a	0.00276307	0.152677	0.528	0.456	0.00646619
Odf2	0.00278691	0.148286	0.525	0.453	0.00651405
Dlat	0.0028014	0.132958	0.467	0.377	0.00653998
Pop4	0.00282866	0.134618	0.514	0.402	0.00659563
Iws1	0.00286241	0.147337	0.692	0.575	0.00666626
Fzr1	0.00287503	0.170155	0.628	0.527	0.00668756
Mrps12	0.00290574	0.136873	0.689	0.609	0.00675086
Stoml2	0.0029174	0.13622	0.824	0.734	0.00676978
Dynlrb1	0.00293463	0.133763	0.93	0.924	0.00679772
Ndufb7	0.00293956	0.130706	0.956	0.921	0.00679772
Setd2	0.00294003	0.137885	0.589	0.493	0.00679772
Mrps34	0.00296045	0.136803	0.695	0.62	0.00683672
Lxn	0.00297305	0.137211	0.416	0.314	0.00685739
Ppp6r3	0.00297652	0.132857	0.48	0.402	0.00685739
Mark3	0.00298339	0.140256	0.68	0.603	0.006865
Hoxc6	0.00299147	0.142024	0.613	0.527	0.00687269
Anapc16	0.00299386	0.139246	0.703	0.612	0.00687269
Ifrd2	0.00300771	0.132805	0.431	0.312	0.00689625
Zdhhc16	0.00303314	0.132537	0.473	0.38	0.00694629
Akr7a5	0.00305229	0.137446	0.715	0.623	0.00698183
Jagn1	0.00305862	0.136225	0.558	0.47	0.00698802
Dnajb11	0.00306611	0.141433	0.785	0.697	0.00699684
Txndc12	0.00307558	0.140115	0.768	0.666	0.00701014
Haus8	0.00308842	0.138115	0.543	0.442	0.00702468
Samd14	0.00308925	0.13284	0.401	0.303	0.00702468
Ndufa9	0.00310392	0.137885	0.788	0.703	0.00704971
Eif1ax	0.00311119	0.140626	0.882	0.802	0.00705788
Ppib	0.00312018	0.116036	0.997	0.992	0.00706995
Casp6	0.00315381	0.137454	0.578	0.473	0.00713777
Srsf11	0.00316184	0.133231	0.974	0.938	0.00714284
Dcaf13	0.00316347	0.130163	0.501	0.405	0.00714284
Gipc1	0.00318008	0.138088	0.842	0.802	0.00716833
Ccm2	0.0031822	0.132331	0.627	0.504	0.00716833
6030408B16Rik	0.00320041	0.163181	0.624	0.541	0.00720092
Dcn	0.00320688	0.372818	0.564	0.442	0.00720707
Kif23	0.0032486	0.183252	0.695	0.623	0.00728396
Zfp945	0.00324866	0.132503	0.399	0.258	0.00728396
Cdk9	0.00328208	0.142236	0.693	0.623	0.00734493
Parl	0.00328348	0.133329	0.572	0.496	0.00734493
Rcc1	0.0033155	0.134363	0.527	0.436	0.00740795
Tor1aip1	0.00333285	0.134961	0.54	0.411	0.00743808
Vamp8	0.00334001	0.135952	0.619	0.518	0.00744543
Cebpz	0.00335154	0.144455	0.73	0.663	0.00746251
Fam96a	0.00335972	0.134534	0.818	0.705	0.00747208
Lamtor1	0.00338745	0.133676	0.927	0.895	0.00752507
Lsg1	0.00339739	0.1306	0.578	0.484	0.00752783
Wdr18	0.00340023	0.138138	0.747	0.643	0.00752783
Rrm2	0.00340377	0.188867	0.747	0.66	0.00752783
Ogfrl1	0.00340433	0.166429	0.557	0.487	0.00752783
Otulin	0.00340953	0.13133	0.507	0.399	0.00753069
Nop56	0.00341636	0.158873	0.883	0.847	0.00753713
Jtb	0.00343131	0.131488	0.555	0.479	0.00756145
Cdc123	0.00344837	0.140443	0.806	0.771	0.00759036
Mrpl12	0.003459	0.136186	0.9	0.875	0.00759756
Rnf10	0.00345953	0.134798	0.762	0.711	0.00759756
Srp72	0.00352091	0.134194	0.88	0.816	0.00772355
Pspc1	0.00354703	0.138076	0.654	0.535	0.00777199
Psmb5	0.00356514	0.127947	0.976	0.966	0.00780279
Npm3	0.00358945	0.136221	0.868	0.844	0.00784123
Smc3	0.00359084	0.132081	0.965	0.972	0.00784123
Pdrg1	0.00361611	0.130322	0.568	0.442	0.00788746
Mmp14	0.0036298	0.155334	0.871	0.833	0.00790837
Fam192a	0.00364185	0.130333	0.534	0.453	0.00791861
Thoc1	0.00364272	0.132875	0.436	0.323	0.00791861
Kcnq1ot1	0.0036621	0.217975	0.924	0.87	0.00795176
Prkag1	0.00373411	0.127782	0.568	0.419	0.00809899
2310009B15Rik	0.00375643	0.139843	0.602	0.504	0.00813822
Asf1b	0.00384523	0.138424	0.589	0.462	0.00832125
Ddx56	0.00386113	0.12768	0.505	0.402	0.00834628
Slc9a3r2	0.00389727	0.15597	0.561	0.439	0.00841472
Phf14	0.00390153	0.13147	0.859	0.765	0.00841472
Rad51	0.00392583	0.163225	0.564	0.473	0.00845766
Pole3	0.00393081	0.138341	0.789	0.714	0.00845893
Dad1	0.0039572	0.1229	0.98	0.977	0.00850622
Zfp503	0.00397171	0.169201	0.771	0.697	0.00852789
Cdh11	0.00398068	0.158702	0.958	0.955	0.00853763
Akt1s1	0.00398524	0.131262	0.684	0.558	0.00853789
Snrpb	0.00399617	0.117344	0.989	0.992	0.00855181
Il33	0.00401824	0.143425	0.432	0.38	0.0085895
Ccdc141	0.00404509	-0.115902	0.181	0.292	0.00863731
Cd248	0.0040727	0.137429	0.527	0.388	0.00866514
Wdr75	0.00407279	0.128845	0.46	0.343	0.00866514
Map2k2	0.00407524	0.135991	0.901	0.895	0.00866514
Snrpa	0.00407613	0.133404	0.892	0.833	0.00866514
Srpk1	0.00411191	0.13388	0.769	0.652	0.00873157
Med4	0.00412489	0.133204	0.774	0.708	0.00874949
Rwdd4a	0.00413839	0.129874	0.419	0.317	0.00876846
Hic1	0.00416727	0.15843	0.862	0.81	0.00881996
Chd3	0.00417246	0.15544	0.93	0.941	0.00882124
Mtdh	0.00420849	0.133111	0.971	0.946	0.00888151
Skiv2l2	0.00421018	0.137083	0.636	0.55	0.00888151
Tma7	0.00423716	0.129594	0.973	0.972	0.00892863
Wars	0.00425687	0.135862	0.378	0.252	0.00896036
Bcat2	0.00427438	0.128297	0.472	0.368	0.00898739
Tpm2	0.00429249	0.151671	0.961	0.943	0.00901563
Qser1	0.00434215	0.141744	0.498	0.425	0.00910575
Sclt1	0.00434485	0.138959	0.63	0.575	0.00910575
Midn	0.0043595	0.130333	0.527	0.397	0.0091248
Timm50	0.00436342	0.136045	0.822	0.771	0.0091248
Yy1	0.00442955	0.137085	0.868	0.802	0.00924042
Ssr3	0.00443148	0.143324	0.91	0.856	0.00924042
Spc24	0.0044331	0.157911	0.958	0.898	0.00924042
Usp16	0.00445055	0.129307	0.513	0.428	0.00926678
Tspan3	0.0044925	0.132815	0.951	0.932	0.00932876
Tmed2	0.00449429	0.143799	0.964	0.941	0.00932876
Trappc4	0.00449485	0.134775	0.781	0.731	0.00932876
Batf3	0.00450713	0.147188	0.369	0.266	0.00934053
B4galt3	0.00451023	0.128567	0.423	0.303	0.00934053
Ctbp1	0.00451781	0.131532	0.898	0.85	0.00934619
Rbm25	0.00455508	0.131466	0.986	0.96	0.0094076
Fiz1	0.00455726	0.129272	0.401	0.306	0.0094076
Dnajb1	0.00458376	0.12648	0.564	0.433	0.0094502
Polr2a	0.00458772	0.145813	0.792	0.728	0.0094502
Prpf40a	0.00461497	0.137713	0.944	0.924	0.0094962
Snf8	0.0046207	0.131119	0.81	0.731	0.00949783
Gpx4	0.00466563	0.125014	0.985	0.975	0.00957323
Atp5f1	0.00466732	0.115085	0.995	0.989	0.00957323
Naa38	0.00469637	0.133897	0.795	0.694	0.00962255
Smim19	0.00475425	0.128893	0.531	0.411	0.0097308
Map1s	0.00476724	0.136003	0.364	0.258	0.00974472
Smc1a	0.00477117	0.147502	0.97	0.96	0.00974472
Rars	0.00483506	0.130743	0.775	0.714	0.00986476
Akr1b3	0.00484716	0.136333	0.684	0.572	0.00987897
Fis1	0.00486444	0.128373	0.958	0.946	0.0099037
St13	0.0048891	0.125602	0.977	0.958	0.0099434
Nup93	0.00494365	0.127388	0.542	0.45	0.0100437
Fancl	0.0049693	0.134331	0.366	0.238	0.0100852
Mrpl22	0.00498662	0.129077	0.653	0.558	0.0101097
Acin1	0.0049983	0.132784	0.912	0.878	0.0101227
Hmgcr	0.0050148	0.138295	0.401	0.295	0.0101442
Dnph1	0.00502156	0.126853	0.495	0.374	0.0101442
Pdap1	0.00503088	0.120529	0.989	0.98	0.0101442
Hras	0.00503093	0.12859	0.873	0.819	0.0101442
5430416N02Rik	0.00503583	0.136261	0.347	0.235	0.0101442
Cnpy3	0.0050405	0.129017	0.561	0.499	0.0101442
Uba1	0.00505835	0.132756	0.762	0.669	0.0101695
Eif1ad	0.00508562	0.131166	0.669	0.558	0.0102137
Azin1	0.00509591	0.131955	0.466	0.382	0.0102237
Eif2b5	0.00511695	0.12746	0.612	0.493	0.0102552
2610524H06Rik	0.00513666	0.135193	0.698	0.601	0.010284
Eny2	0.0051498	0.123478	0.973	0.969	0.0102996
Rasl11b	0.00519297	0.161496	0.483	0.411	0.0103734
Ints10	0.00519746	0.125818	0.416	0.303	0.0103734
H19	0.00524015	0.173242	0.9	0.904	0.0104374
Gpx1	0.0052404	0.136866	0.891	0.836	0.0104374
H2afv	0.0052499	0.138862	1	0.997	0.0104456
Dcps	0.0052922	0.129111	0.684	0.606	0.0105189
Capza1	0.00531837	0.130502	0.695	0.592	0.01056
Pdzd2	0.00532937	0.144604	0.542	0.459	0.0105709
Mrpl49	0.00533748	0.128163	0.687	0.581	0.0105761
Plod3	0.00536181	0.125904	0.52	0.431	0.0106134
Mrpl18	0.00544214	0.138987	0.933	0.918	0.0107613
Magoh	0.00545816	0.129098	0.906	0.875	0.010782
B3gat3	0.00546734	0.126879	0.469	0.374	0.0107882
Acat2	0.00547468	0.136056	0.423	0.334	0.0107882
Mrps22	0.00547907	0.124577	0.561	0.459	0.0107882
Nav1	0.00548373	0.148797	0.475	0.36	0.0107882
Txn1	0.00549251	0.116112	0.997	1	0.0107945
Clk4	0.00550206	0.123638	0.492	0.388	0.0108022
Exosc8	0.00553149	0.135334	0.877	0.856	0.0108462
Nubp1	0.00553574	0.134938	0.68	0.575	0.0108462
Trappc2l	0.00554917	0.12726	0.722	0.62	0.0108504
Anp32e	0.00555005	0.148316	0.947	0.909	0.0108504
Glrx3	0.00555617	0.12243	0.974	0.966	0.0108504
Cnot7	0.00556587	0.122552	0.466	0.374	0.0108504
Ruvbl1	0.00556602	0.135808	0.883	0.875	0.0108504
Twsg1	0.0055878	0.130748	0.451	0.368	0.0108818
Dynlt1f	0.0055943	0.132608	0.721	0.637	0.0108835
Bcap31	0.00560783	0.127862	0.895	0.87	0.0108988
Psmg2	0.00564047	0.134224	0.728	0.652	0.0109348
Ppih	0.00564216	0.130575	0.778	0.714	0.0109348
Tceal9	0.00564342	0.114829	1	0.994	0.0109348
Srpr	0.00565743	0.134031	0.774	0.666	0.0109435
Tnpo1	0.00565925	0.123321	0.552	0.419	0.0109435
Glt8d1	0.0056976	0.121168	0.52	0.405	0.0109923
Ccne1	0.0057	0.161582	0.608	0.442	0.0109923
Ralb	0.00570164	0.133388	0.707	0.649	0.0109923
Cox7b	0.00570949	0.121139	0.974	0.96	0.0109937
Qdpr	0.00571751	0.128692	0.678	0.612	0.0109937
Unc5c	0.00571947	0.13645	0.466	0.346	0.0109937
Psmd11	0.00575018	0.128323	0.906	0.847	0.0110417
Aspn	0.00576031	-0.123079	0.278	0.3	0.0110502
Psmd5	0.00576977	0.125105	0.552	0.459	0.0110573
Mak16	0.0058259	0.128162	0.502	0.414	0.0111538
Nup88	0.00591111	0.124235	0.476	0.377	0.0112788
Ndufa11	0.00591724	0.123468	0.973	0.921	0.0112788
Mphosph10	0.00591879	0.135381	0.648	0.572	0.0112788
Psmd2	0.00592249	0.140174	0.921	0.904	0.0112788
Ube2f	0.00592556	0.128081	0.528	0.442	0.0112788
Hnrnpu	0.00592637	0.157027	0.991	0.994	0.0112788
Pdcd5	0.00598101	0.121669	0.979	0.983	0.0113716
Ntan1	0.0060173	0.133688	0.857	0.79	0.0114293
Pbrm1	0.00604234	0.135034	0.926	0.836	0.0114656
Tor1a	0.00605397	0.122149	0.554	0.45	0.0114763
mt-Co3	0.00613459	0.124858	0.998	1	0.0116177
Ccz1	0.00614123	0.124261	0.598	0.496	0.0116189
Wdr6	0.00617005	0.124412	0.47	0.399	0.0116619
Mrps18b	0.00620695	0.123969	0.455	0.365	0.0117202
Fen1	0.00623418	0.143793	0.683	0.547	0.0117601
Tmem158	0.00629403	0.180941	0.299	0.164	0.0118614
Mcm7	0.00635158	0.17799	0.847	0.83	0.0119581
Gxylt1	0.00646167	0.128735	0.451	0.348	0.0121535
Ndufs3	0.006468	0.12847	0.888	0.861	0.0121535
Mapre1	0.00647643	0.129352	0.941	0.898	0.0121575
Pimreg	0.00657062	0.185607	0.677	0.595	0.0123223
Uba5	0.00659574	0.12485	0.671	0.564	0.0123574
Myh10	0.00661426	0.162214	0.926	0.904	0.0123731
Chmp4b	0.00661695	0.131294	0.886	0.847	0.0123731
Prpf19	0.00664365	0.127335	0.885	0.819	0.0123863
Gfer	0.00664518	0.125215	0.674	0.586	0.0123863
Vdac1	0.00665017	0.123131	0.961	0.946	0.0123863
Utp11	0.006654	0.127296	0.891	0.81	0.0123863
Mrpl13	0.00665616	0.128611	0.897	0.85	0.0123863
Oat	0.00669321	0.129516	0.921	0.878	0.0124432
Smc2	0.00671559	0.163811	0.968	0.946	0.0124727
Mrpl17	0.00675722	0.128231	0.877	0.822	0.012538
Aars	0.00682415	0.124053	0.473	0.365	0.01265
Gmps	0.00683756	0.128137	0.851	0.799	0.0126626
Mrps33	0.00688218	0.124914	0.9	0.898	0.0127196
Smad2	0.00688751	0.122046	0.53	0.453	0.0127196
Mrpl4	0.0068931	0.127036	0.704	0.618	0.0127196
Bin1	0.00690247	0.129066	0.619	0.516	0.0127196
Atp6v0d1	0.00690738	0.123862	0.677	0.578	0.0127196
Arhgap11a	0.00690794	0.151347	0.508	0.419	0.0127196
Smyd2	0.00696014	0.127388	0.602	0.518	0.0128035
Dusp11	0.0069791	0.130916	0.646	0.55	0.0128261
Pclaf	0.00699756	0.164443	0.982	0.969	0.0128478
Rab35	0.0070434	0.124462	0.419	0.309	0.0129196
B9d1	0.00705538	0.122371	0.492	0.368	0.0129293
Tmem183a	0.00714459	0.124483	0.61	0.527	0.0130803
Snrpe	0.00721582	0.112681	0.991	0.98	0.0131982
Sdhaf1	0.00722705	0.122601	0.54	0.47	0.0132062
Pnisr	0.00725716	0.139724	0.924	0.892	0.0132479
Cby1	0.00726366	0.126795	0.656	0.575	0.0132479
Phf3	0.00731644	0.132822	0.827	0.714	0.0133316
Abhd8	0.00732771	0.127592	0.581	0.49	0.0133395
Mtpn	0.0074258	0.127716	0.778	0.697	0.0135053
Nup35	0.0074819	0.119894	0.455	0.365	0.0135945
Atf4	0.00749389	0.125809	0.794	0.697	0.0136034
Hist1h3f	0.00751957	0.159657	0.291	0.17	0.0136372
Ing4	0.00755874	0.124481	0.674	0.595	0.0136953
Topbp1	0.00758888	0.144377	0.713	0.649	0.013737
Auts2	0.00761793	0.137131	0.879	0.813	0.0137766
Arid2	0.00763036	0.128676	0.487	0.414	0.0137862
Mob2	0.00765256	0.119905	0.48	0.38	0.0138133
Sec61a2	0.00766409	0.119223	0.439	0.329	0.0138212
Epc1	0.00771197	0.127377	0.464	0.363	0.0138884
Agtr2	0.00771579	0.159025	0.328	0.232	0.0138884
Ddx6	0.00779989	0.136528	0.751	0.68	0.0140267
Ndufa12	0.00783599	0.118929	0.959	0.938	0.0140785
Impdh2	0.00788539	0.122857	0.932	0.924	0.014154
Nsdhl	0.0079568	0.158368	0.285	0.176	0.0142689
Myl12b	0.00796701	0.125357	0.951	0.921	0.0142739
Tkt	0.00797674	0.120553	0.965	0.946	0.0142781
Rpp25l	0.00798651	0.128862	0.748	0.66	0.0142823
Pafah1b2	0.00801827	0.127838	0.765	0.677	0.0143258
Igfbp2	0.00804552	-0.145047	0.387	0.419	0.0143611
Cdca3	0.00809518	0.171911	0.741	0.708	0.0144356
Elp2	0.00810224	0.120649	0.561	0.462	0.0144356
Kdelr3	0.00821732	0.148458	0.554	0.504	0.0146271
Isy1	0.0082291	0.119627	0.489	0.377	0.0146346
Matn2	0.0082474	0.141088	0.645	0.547	0.0146506
Fam3c	0.00825746	0.122698	0.568	0.501	0.0146506
Dld	0.00826726	0.127136	0.73	0.674	0.0146506
Lman1	0.00826853	0.121194	0.923	0.884	0.0146506
Virma	0.00827664	0.125614	0.51	0.436	0.0146515
P3h1	0.0083227	0.12121	0.449	0.36	0.0147195
Atp5h	0.00836081	0.106004	0.998	0.994	0.0147733
Cops5	0.00840975	0.124173	0.894	0.836	0.0148188
Traf2	0.00841472	0.131888	0.343	0.221	0.0148188
Ppid	0.00841674	0.131512	0.862	0.847	0.0148188
Tmem101	0.00841735	0.120091	0.472	0.402	0.0148188
Stard3	0.0084789	0.121642	0.401	0.292	0.0149136
Psmd12	0.00858222	0.122136	0.944	0.907	0.0150728
Uqcr11	0.00858913	0.115255	0.977	0.952	0.0150728
Wdr45b	0.00859293	0.125767	0.73	0.654	0.0150728
Mapkapk2	0.00861704	0.128179	0.671	0.586	0.0151014
Yap1	0.00863124	0.117862	0.475	0.38	0.0151057
Dnajc2	0.00863519	0.129257	0.772	0.7	0.0151057
Aven	0.00868205	0.118359	0.527	0.416	0.0151739
Pex13	0.00870694	0.118253	0.572	0.465	0.0152036
Dhrs4	0.00872013	0.126863	0.789	0.734	0.0152128
Tardbp	0.00874329	0.133869	0.836	0.776	0.0152394
Ap3s1	0.00876897	0.12463	0.692	0.632	0.0152704
Arcn1	0.00879178	0.134307	0.73	0.646	0.0152963
Tpst1	0.00884018	0.126903	0.536	0.442	0.0153666
Ftsj3	0.00891841	0.125895	0.467	0.346	0.0154886
Ptms	0.00892682	0.138472	0.997	0.989	0.0154892
Riok1	0.00897594	0.124539	0.663	0.601	0.0155604
Dapk3	0.00902961	0.120185	0.568	0.456	0.0156394
Eif2s3x	0.00904717	0.119179	0.527	0.402	0.0156557
Cpsf2	0.00908215	0.121535	0.583	0.493	0.0157022
Micu1	0.00909916	0.125864	0.548	0.456	0.0157175
Cnpy2	0.00912105	0.123898	0.979	0.941	0.0157412
Phax	0.00913377	0.124634	0.847	0.751	0.015749
Tmem176b	0.00915333	0.127028	0.827	0.765	0.0157579
Arpc5	0.00916173	0.129986	0.865	0.833	0.0157579
Gde1	0.00916347	0.1237	0.593	0.521	0.0157579
Sox11	0.00918443	0.135689	0.656	0.578	0.0157798
Gdnf	0.00922135	0.155903	0.463	0.408	0.0158292
Ppic	0.00923054	0.133798	0.958	0.932	0.0158308
Dpysl3	0.0093306	0.129142	0.525	0.442	0.0159882
Ebpl	0.00937115	0.122439	0.68	0.589	0.0160242
Ndufaf4	0.00937209	0.121657	0.452	0.365	0.0160242
Fam96b	0.0093766	0.123164	0.744	0.66	0.0160242
Cycs	0.00939502	0.147073	0.883	0.861	0.0160415
Coq5	0.00946571	0.116932	0.452	0.334	0.0161338
Tmx2	0.00946584	0.117325	0.49	0.388	0.0161338
Proser1	0.00955842	0.118319	0.454	0.337	0.0162764
Mettl9	0.00956643	0.1243	0.971	0.969	0.0162764
Rrp1	0.00963418	0.119619	0.968	0.912	0.0163772
Nsmce1	0.00967215	0.127103	0.912	0.873	0.0164273
Ptbp2	0.00971215	0.125652	0.402	0.3	0.0164807
Ndufb5	0.0097452	0.114756	0.985	0.98	0.0165222
Ube2j2	0.00978026	0.123029	0.71	0.666	0.0165671
Ube2g2	0.00987282	0.123422	0.366	0.258	0.0167092
Cnot8	0.00991091	0.114866	0.495	0.397	0.0167589
U2af2	0.00993326	0.12912	0.841	0.802	0.016782
Fstl1	0.00996359	0.147772	0.967	0.949	0.0168185
Ssbp3	0.0100678	0.128442	0.832	0.731	0.0169795
Taf11	0.0100788	0.121212	0.713	0.64	0.0169832
Zfp326	0.0100918	0.126586	0.848	0.79	0.0169902
Trabd	0.0101173	0.116986	0.507	0.388	0.0170183
Baz1b	0.010127	0.15074	0.841	0.796	0.0170198
Asf1a	0.0102839	0.124766	0.825	0.776	0.0172683
Arf2	0.0103163	0.117587	0.44	0.3	0.0173077
Ormdl3	0.0104335	0.117253	0.49	0.428	0.017489
Mrpl52	0.010492	0.124731	0.962	0.96	0.0175718
Chchd2	0.0105083	0.101661	1	1	0.017582
Prelid3b	0.0105163	0.124325	0.634	0.592	0.017582
Reep5	0.0106511	0.128347	0.936	0.915	0.0177918
Jpt1	0.010717	0.178462	0.938	0.904	0.0178864
Hnrnpab	0.0108076	0.122999	0.989	0.986	0.018022
Lsm8	0.0108177	0.126183	0.93	0.918	0.0180233
Meaf6	0.0108463	0.119061	0.631	0.586	0.0180427
Map4k4	0.0108558	0.135764	0.839	0.782	0.0180427
Sumo1	0.0108575	0.118576	0.983	0.955	0.0180427
Hnrnph2	0.0109306	0.124444	0.725	0.669	0.0181486
Lum	0.0110387	0.262864	0.214	0.136	0.0183123
Uck2	0.0110927	0.118586	0.524	0.453	0.018386
Ecm1	0.0112003	-0.112476	0.816	0.802	0.0185362
Nop58	0.0112026	0.135152	0.953	0.918	0.0185362
H2afy2	0.0112479	0.126094	0.898	0.881	0.0185952
Wtap	0.0112591	0.12383	0.648	0.558	0.0185977
Twf2	0.0113187	0.115883	0.451	0.368	0.0186802
BC005537	0.0113422	0.120228	0.51	0.436	0.0186876
Crtap	0.0113426	0.127048	0.741	0.68	0.0186876
Haspin	0.0113669	0.117682	0.498	0.365	0.0187009
Prpsap1	0.0113701	0.127161	0.719	0.635	0.0187009
Mettl23	0.0114136	0.116901	0.595	0.456	0.0187507
Smchd1	0.0114297	0.134812	0.86	0.839	0.0187507
Vamp7	0.0114343	0.121008	0.392	0.295	0.0187507
Gspt1	0.0114393	0.129637	0.926	0.887	0.0187507
Ube2q1	0.0114651	0.117473	0.654	0.552	0.0187628
Ddx24	0.0114661	0.125373	0.854	0.773	0.0187628
Zwint	0.0115239	0.125515	0.879	0.793	0.0188413
Cox5a	0.0115697	0.118838	0.989	0.983	0.0189001
Ptp4a2	0.0117362	0.125222	0.892	0.841	0.0191268
Cnot1	0.0117369	0.122483	0.63	0.516	0.0191268
Safb2	0.0117382	0.127048	0.608	0.555	0.0191268
Saraf	0.0117635	0.118755	0.643	0.535	0.0191419
Polr2h	0.0117674	0.121857	0.666	0.592	0.0191419
Leo1	0.0118274	0.121123	0.715	0.623	0.0192096
Ptpn2	0.0118289	0.119427	0.58	0.504	0.0192096
Bhlhb9	0.011863	0.115033	0.48	0.419	0.0192486
Cenpe	0.0119607	0.238391	0.777	0.731	0.0193909
Pja1	0.0119749	0.126734	0.821	0.776	0.0193975
Prkcsh	0.0119894	0.124754	0.791	0.717	0.0194047
Phf23	0.0120329	0.11365	0.517	0.397	0.0194559
Rpl31	0.0120412	0.101224	1	0.994	0.0194559
Tsen34	0.0120778	0.121119	0.956	0.932	0.0194892
Clns1a	0.0120821	0.122959	0.832	0.765	0.0194892
Unc50	0.012169	0.116677	0.648	0.564	0.0196129
H2afj	0.0121793	0.123519	0.859	0.805	0.0196132
Gpr180	0.0122218	0.126752	0.478	0.391	0.0196651
Chchd4	0.0122383	0.117598	0.525	0.433	0.0196753
Atf6b	0.0122798	0.115092	0.42	0.317	0.0196953
Msrb2	0.0122884	0.117069	0.378	0.261	0.0196953
Atp2a2	0.0122893	0.122483	0.612	0.533	0.0196953
Rbm10	0.0122917	0.116926	0.595	0.516	0.0196953
Homer3	0.0123315	0.123742	0.367	0.263	0.0197426
R3hdm1	0.0123703	0.123286	0.733	0.643	0.0197884
Gcat	0.0123932	0.121184	0.396	0.244	0.0198086
Tbl3	0.012412	0.110486	0.451	0.337	0.0198221
Slc25a39	0.0124694	0.122173	0.727	0.683	0.0198905
Gm8186	0.0124754	0.119781	0.646	0.586	0.0198905
Hikeshi	0.0126583	0.119876	0.809	0.739	0.0201654
2022-03-07	0.0127419	0.122682	0.718	0.623	0.0202818
Afg3l1	0.0127817	0.113117	0.563	0.439	0.0203049
Nifk	0.0127844	0.119947	0.586	0.53	0.0203049
Hnrnpd	0.0127881	0.124637	0.997	0.992	0.0203049
Efnb1	0.0128212	0.12842	0.542	0.456	0.0203407
4930453N24Rik	0.0128331	0.12086	0.672	0.601	0.0203429
Sltm	0.0128477	0.13541	0.81	0.751	0.0203492
Gemin7	0.0128841	0.122839	0.777	0.711	0.0203901
Gnl3	0.0129051	0.146582	0.78	0.714	0.0204066
Nosip	0.0129477	0.114527	0.448	0.331	0.0204571
Twistnb	0.0129783	0.121038	0.757	0.7	0.0204886
Nelfe	0.0130076	0.123623	0.78	0.731	0.0205181
Tmem132a	0.0130342	0.11608	0.39	0.255	0.0205432
Ctu2	0.0130488	0.121292	0.366	0.28	0.0205495
Pmp22	0.0130741	0.154109	0.675	0.623	0.0205724
Gtf2e2	0.0131413	0.12355	0.763	0.688	0.0206613
Zfp664	0.01317	0.120531	0.605	0.535	0.0206896
Rcn2	0.0132458	0.118881	0.897	0.833	0.0207869
Prkd3	0.0132535	0.120185	0.517	0.433	0.0207869
Snrnp200	0.0132721	0.122207	0.569	0.482	0.0207991
Psap	0.0132835	0.12356	0.847	0.805	0.0208
Ndufa8	0.0133101	0.116636	0.933	0.929	0.0208145
mt-Atp6	0.0133144	0.113331	0.998	1	0.0208145
Nip7	0.0133433	0.123113	0.616	0.567	0.0208429
Rbbp7	0.013365	0.120697	0.977	0.941	0.0208599
Med28	0.013439	0.119039	0.842	0.762	0.0209583
Polr2l	0.0135878	0.111373	0.473	0.385	0.0211732
Cenpw	0.0136516	0.134705	0.824	0.756	0.0212554
Lsm2	0.0136775	0.116388	0.954	0.935	0.0212786
Sdha	0.0136937	0.119524	0.882	0.822	0.0212866
Eif4ebp1	0.0137094	0.126416	0.759	0.711	0.0212938
Cdyl	0.0137996	0.117682	0.404	0.309	0.0214166
Unc119	0.0138783	0.112707	0.48	0.385	0.0215214
Txnrd1	0.0139187	0.118372	0.63	0.538	0.0215667
Alas1	0.014019	0.116997	0.396	0.289	0.021704
Prmt7	0.0140298	0.116253	0.499	0.436	0.021704
Spdl1	0.01414	0.132914	0.516	0.419	0.0218568
Nup37	0.0142566	0.133134	0.602	0.476	0.0220194
Usp39	0.0144114	0.113668	0.478	0.377	0.0222406
Hist1h2bj	0.014443	0.137741	0.338	0.232	0.0222717
Iffo2	0.0144936	0.125098	0.352	0.269	0.0223318
Mex3a	0.0145769	0.124956	0.622	0.555	0.0224422
Emd	0.0146755	0.118134	0.774	0.708	0.0225656
Cdc45	0.0146911	0.126786	0.514	0.433	0.0225656
Mrpl41	0.0146922	0.117439	0.742	0.666	0.0225656
Ptcd2	0.0148072	0.111061	0.486	0.388	0.022724
Zc3h13	0.0148281	0.127479	0.868	0.796	0.0227275
Akap12	0.014833	0.153319	0.874	0.85	0.0227275
Ubfd1	0.014857	0.112553	0.571	0.453	0.022746
Pin4	0.0149616	0.118364	0.785	0.691	0.022888
Plrg1	0.0150255	0.113343	0.525	0.402	0.0229675
Uap1l1	0.0150544	-0.100297	0.178	0.269	0.0229935
Spout1	0.0153051	0.110216	0.513	0.436	0.0233578
Cops8	0.0153672	0.118311	0.813	0.762	0.023434
Tomm20	0.0154772	0.117228	0.976	0.966	0.0235654
Bub1b	0.0154778	0.155623	0.577	0.518	0.0235654
Nudcd2	0.0154905	0.124803	0.88	0.853	0.0235661
Zfp422	0.0155142	0.116209	0.683	0.601	0.0235836
Sec61a1	0.0155375	0.117103	0.604	0.521	0.0235877
Katna1	0.0155533	0.112276	0.464	0.382	0.0235877
Kif22	0.0155537	0.161707	0.774	0.68	0.0235877
Taf1d	0.0156014	0.133221	0.909	0.861	0.0236415
Lap3	0.0156309	0.120523	0.741	0.677	0.0236675
Pithd1	0.0156694	0.125605	0.326	0.198	0.0237072
Knstrn	0.0157002	0.156896	0.741	0.669	0.0237246
Eid2	0.0157055	0.116552	0.665	0.567	0.0237246
Ap2s1	0.0157331	0.115025	0.918	0.909	0.0237476
Miip	0.0157789	0.127763	0.344	0.244	0.0237981
Vps35	0.0160009	0.120155	0.76	0.686	0.0241006
6330403K07Rik	0.0160045	0.132867	0.566	0.53	0.0241006
Fam103a1	0.0160409	0.116856	0.672	0.567	0.0241209
Hoxd10	0.016043	0.125821	0.54	0.448	0.0241209
0610037L13Rik	0.016143	0.117223	0.668	0.623	0.0242523
Ect2	0.016179	0.124799	0.528	0.433	0.0242747
Zranb2	0.0161832	0.124117	0.944	0.904	0.0242747
Rest	0.0163058	0.121006	0.877	0.822	0.0244396
Dbf4	0.0163601	0.154723	0.745	0.643	0.0245019
Rtcb	0.0163972	0.117088	0.815	0.765	0.0245385
Idh3g	0.0164986	0.119952	0.781	0.742	0.024671
Timm10	0.016555	0.112967	0.498	0.428	0.0247362
Plpp1	0.016582	0.120499	0.483	0.391	0.0247573
Mcm5	0.0166107	0.157624	0.781	0.759	0.0247809
Lias	0.0166256	0.112553	0.58	0.499	0.024784
Grpel1	0.0166675	0.118001	0.868	0.802	0.0248272
Cped1	0.0167873	0.118419	0.502	0.411	0.0249863
Tmem119	0.0168549	0.12429	0.358	0.269	0.0250676
Prrc2c	0.0169184	0.117283	0.964	0.952	0.0251274
Cggbp1	0.0169259	0.119407	0.873	0.839	0.0251274
Cdc20	0.0169343	0.230468	0.71	0.632	0.0251274
Thy1	0.017086	0.192904	0.229	0.099	0.0253331
Hist1h1a	0.0171063	0.170456	0.516	0.467	0.0253436
Lsm12	0.0172	0.117796	0.918	0.87	0.0254629
Rnf4	0.0172136	0.110643	0.61	0.482	0.0254634
Sgcb	0.0173054	0.110277	0.436	0.303	0.0255549
Mrps18a	0.0173143	0.115917	0.728	0.683	0.0255549
Dmap1	0.0173152	0.109058	0.49	0.382	0.0255549
Polr3k	0.0174171	0.113017	0.643	0.569	0.0256856
Mrpl51	0.0174718	0.122082	0.945	0.938	0.0257349
Hmgb1	0.0174773	0.113874	1	1	0.0257349
Tsr3	0.0175786	0.10942	0.484	0.399	0.0258643
Lrpap1	0.0176542	0.111705	0.785	0.737	0.0259557
Hsd17b12	0.0176862	0.117158	0.678	0.584	0.025982
Zfp639	0.0176998	0.115775	0.592	0.487	0.025982
Psmb7	0.0177147	0.115392	0.912	0.864	0.025982
Stx5a	0.017726	0.115653	0.622	0.527	0.025982
Mad1l1	0.0177612	0.110803	0.44	0.371	0.0260138
Uri1	0.0177926	0.117893	0.637	0.55	0.02604
Pacsin3	0.0178567	0.126686	0.323	0.201	0.0261139
Adm	0.017899	-0.141902	0.156	0.229	0.0261559
Ap2a1	0.0181356	0.111581	0.634	0.527	0.0264816
Bud23	0.0182817	0.114112	0.7	0.609	0.0266746
Syncrip	0.0183626	0.129052	0.924	0.892	0.0267725
Zfp553	0.0183865	0.110173	0.448	0.382	0.026787
Tpd52l2	0.0184072	0.116234	0.772	0.691	0.0267968
Dlst	0.0185392	0.114792	0.636	0.567	0.0269686
Stk16	0.0186159	0.117555	0.686	0.652	0.0270598
Mgst1	0.0186337	0.132104	0.483	0.397	0.0270653
Cript	0.0187337	0.113116	0.736	0.615	0.0271794
Cyb5r3	0.0187405	0.117262	0.785	0.72	0.0271794
Clptm1	0.0187637	0.110527	0.487	0.388	0.0271925
Calm2	0.0188544	0.127048	0.997	0.994	0.0273035
Rcbtb2	0.0190982	0.118462	0.815	0.768	0.0276357
Tdg	0.0191902	0.114217	0.607	0.544	0.0277479
Fscn1	0.019288	0.11783	0.812	0.748	0.0278684
Fnta	0.0193331	0.116107	0.751	0.731	0.0279127
Rab14	0.019415	0.123488	0.965	0.96	0.02801
Ndufs4	0.019507	0.115138	0.914	0.898	0.0281217
Pdhb	0.0195286	0.112405	0.728	0.592	0.0281228
Tsen2	0.019537	0.11262	0.395	0.28	0.0281228
Brd1	0.0195782	0.11975	0.739	0.657	0.028161
Ldah	0.0195984	0.110689	0.408	0.309	0.028169
Prdx4	0.0196166	0.125253	0.98	0.977	0.0281742
Sh3pxd2a	0.0196473	0.114965	0.416	0.317	0.0281973
Mad2l1	0.0197114	0.122408	0.7	0.623	0.0282681
Tspan31	0.0198435	0.115382	0.703	0.626	0.0284364
Magohb	0.0200665	0.111451	0.646	0.575	0.028718
Ankrd26	0.0200813	0.117492	0.401	0.312	0.028718
Boc	0.0200847	0.113516	0.42	0.32	0.028718
Sh3glb2	0.0201197	0.110803	0.434	0.337	0.0287466
Ier3ip1	0.0201532	0.116042	0.853	0.807	0.0287732
Setx	0.0201739	0.122847	0.366	0.241	0.0287772
Trip13	0.0201859	0.121897	0.693	0.618	0.0287772
Ykt6	0.0203948	0.112961	0.355	0.255	0.0290536
Egln2	0.0204304	0.112811	0.686	0.652	0.0290828
Smoc2	0.0204835	0.255456	0.191	0.125	0.0291368
Hmgcl	0.0205835	0.110012	0.47	0.377	0.0292574
Cul3	0.0207149	0.121429	0.825	0.742	0.0294225
Tubb2b	0.0207592	0.129743	0.317	0.275	0.0294523
Mia3	0.0207665	0.113852	0.534	0.462	0.0294523
E2f6	0.0209439	0.118957	0.323	0.241	0.0296821
2610037D02Rik	0.0209956	0.111723	0.452	0.351	0.0297335
Flrt2	0.0210598	0.150696	0.564	0.484	0.0298025
Bod1l	0.0211058	0.130418	0.871	0.819	0.0298456
Adgre5	0.0211285	0.126786	0.319	0.229	0.0298559
Fgfr1op2	0.0211536	0.112834	0.724	0.629	0.0298694
Ipo5	0.0212178	0.118719	0.674	0.632	0.0299352
Pmpcb	0.0212313	0.113688	0.786	0.748	0.0299352
Znhit2	0.0212647	0.111763	0.367	0.275	0.0299549
Ncl	0.0212764	0.129793	0.998	0.992	0.0299549
Cxcl12	0.0213014	0.21838	0.508	0.425	0.029955
Iah1	0.0213076	0.110135	0.633	0.547	0.029955
Ufc1	0.0213998	0.113582	0.869	0.839	0.0300628
Urod	0.0214763	0.110957	0.639	0.558	0.0301482
Wapl	0.0214997	0.115211	0.721	0.652	0.0301522
Tmem237	0.0215105	0.114012	0.668	0.603	0.0301522
Samm50	0.0215353	0.114097	0.859	0.85	0.0301651
Rbm34	0.0216663	0.108391	0.402	0.295	0.0303265
Idh2	0.0217531	0.11204	0.988	0.989	0.0304259
Gtf2h5	0.0218269	0.117748	0.939	0.898	0.0304952
Hibadh	0.0218343	0.125215	0.624	0.53	0.0304952
Rbm28	0.02193	0.128967	0.853	0.805	0.0306067
Ptgis	0.0219506	0.138034	0.724	0.683	0.0306132
Kcmf1	0.0220938	0.115567	0.786	0.739	0.0307907
Hspa13	0.0221587	0.114387	0.639	0.561	0.0308368
Prpf38a	0.022159	0.113119	0.742	0.657	0.0308368
Faf1	0.0222082	0.108211	0.546	0.453	0.0308831
Rbm14	0.0222633	0.115092	0.388	0.309	0.0308844
Zfp398	0.0222657	0.140599	0.281	0.161	0.0308844
Cdipt	0.0222785	0.109714	0.381	0.292	0.0308844
Nisch	0.0222846	0.115763	0.901	0.833	0.0308844
Znhit6	0.0222991	0.108993	0.568	0.467	0.0308844
Tmem259	0.0223054	0.109646	0.531	0.453	0.0308844
Syce2	0.0223817	0.124941	0.757	0.674	0.0309678
Smim10l1	0.0224249	0.118541	0.719	0.68	0.0310053
Eif3l	0.0224826	0.111308	0.906	0.867	0.0310628
Pdlim2	0.0225471	0.119587	0.924	0.878	0.0311296
Tmem176a	0.0225697	0.130546	0.789	0.683	0.0311384
Atg3	0.0225921	0.108548	0.586	0.535	0.0311471
Cnot11	0.0227777	0.105728	0.486	0.377	0.0313804
Hspa12b	0.0229078	0.126814	0.296	0.212	0.0315371
Gon4l	0.0229343	0.112567	0.677	0.609	0.031551
Maea	0.0230432	0.108783	0.657	0.572	0.0316782
Tmem98	0.0231037	0.106974	0.476	0.394	0.0317307
Ppan	0.0231143	0.116941	0.487	0.414	0.0317307
Nap1l4	0.0231838	0.114877	0.895	0.847	0.0317957
Abhd17a	0.0231947	0.114305	0.792	0.751	0.0317957
Snrpd3	0.0232266	0.112694	0.973	0.938	0.0318168
Nudcd3	0.0232434	0.113671	0.736	0.669	0.0318172
Rab5c	0.023276	0.112257	0.748	0.688	0.0318297
Lims1	0.0233005	0.123007	0.844	0.796	0.0318297
Dynll1	0.0233033	0.165677	0.997	0.997	0.0318297
Tnfaip1	0.0233186	0.108231	0.625	0.521	0.0318297
Polr1c	0.0233567	0.109423	0.648	0.578	0.0318591
Nab2	0.0234179	0.120047	0.64	0.567	0.0319199
Pcnp	0.0234979	0.11779	0.794	0.742	0.0320062
Ptk7	0.0235144	0.116762	0.627	0.533	0.0320062
Cars	0.0235466	0.111279	0.387	0.306	0.0320274
Noc2l	0.0235791	0.110791	0.572	0.499	0.032049
Cnep1r1	0.0236194	0.113415	0.546	0.476	0.0320811
Noc4l	0.0237206	0.110391	0.361	0.292	0.0321958
Ywhag	0.0237719	0.104625	0.569	0.448	0.0322427
Prkrip1	0.0238222	0.104711	0.461	0.377	0.0322562
Rrm1	0.0238297	0.127899	0.873	0.773	0.0322562
Mgea5	0.0238321	0.106632	0.436	0.374	0.0322562
Glod4	0.0239373	0.111423	0.7	0.626	0.0323759
Nme2	0.0240539	0.130205	0.305	0.178	0.0325108
Hist1h1d	0.0242029	0.159706	0.519	0.445	0.0326892
Gm10093	0.0242399	-0.128664	0.137	0.235	0.0327162
Lrr1	0.0242922	0.115038	0.387	0.292	0.0327638
Ergic3	0.0243249	0.111649	0.856	0.813	0.032785
Cttn	0.0244184	0.11321	0.605	0.53	0.032888
Rnf2	0.024599	0.104419	0.507	0.397	0.033108
Ncbp1	0.0247398	0.110881	0.486	0.408	0.0332744
Rad23b	0.0248085	0.109914	0.737	0.663	0.0333267
Ik	0.0248133	0.114537	0.789	0.722	0.0333267
Cntrl	0.025004	0.127486	0.48	0.439	0.0335594
Coro1b	0.0250443	0.108342	0.645	0.558	0.0335813
Ndufc1	0.0250552	0.112983	0.956	0.955	0.0335813
Ndufb6	0.0250746	0.110952	0.941	0.89	0.033584
Plekhg2	0.0251735	0.112088	0.527	0.428	0.033693
Tmbim6	0.0253471	0.11476	0.944	0.912	0.0339017
Map7d1	0.0255181	0.11233	0.651	0.569	0.0341068
Ip6k2	0.0256287	0.106966	0.476	0.402	0.0342299
Igfbp6	0.0256458	0.225895	0.19	0.127	0.0342299
Dimt1	0.025667	0.108897	0.463	0.38	0.0342346
Ccnl2	0.025722	0.11239	0.757	0.705	0.0342841
Mrpl16	0.0258336	0.105552	0.473	0.411	0.034402
Tk1	0.0258461	0.132521	0.734	0.629	0.034402
Hsd17b10	0.0259022	0.106547	0.959	0.938	0.0344528
Rtca	0.0259664	0.102553	0.514	0.385	0.0345143
Pfn2	0.026066	0.152529	0.569	0.493	0.0346229
Rnh1	0.0262676	0.112398	0.819	0.782	0.0348666
Ctr9	0.0263126	0.105671	0.64	0.569	0.0349022
Pdlim7	0.0263428	0.117734	0.794	0.72	0.0349183
Hyal2	0.0264	0.104711	0.454	0.371	0.0349701
Ankhd1	0.026486	0.104932	0.483	0.377	0.0350598
Timm13	0.0265451	0.10849	0.956	0.926	0.0351139
Ppm1m	0.02661	0.10379	0.493	0.397	0.0351756
Hcfc1	0.0266419	0.107296	0.549	0.484	0.0351936
Rnf215	0.0266914	0.109881	0.375	0.289	0.0352218
Crcp	0.0266998	0.118001	0.331	0.218	0.0352218
Spg7	0.0267784	0.103857	0.493	0.411	0.0353014
Pdzd11	0.0268812	0.11151	0.684	0.615	0.0354125
Rsu1	0.0269077	0.123568	0.873	0.833	0.0354233
Bcl7c	0.0271316	0.109459	0.948	0.938	0.0356936
Hat1	0.0271719	0.12595	0.81	0.79	0.0357223
Dap	0.0272576	0.118372	0.754	0.691	0.0358105
Ufm1	0.0272898	0.11422	0.697	0.618	0.0358283
Trmt6	0.0273828	0.105498	0.44	0.337	0.035926
Nudt3	0.0274209	0.106009	0.555	0.465	0.0359514
Erg28	0.0275711	0.125392	0.806	0.742	0.0361238
Rcl1	0.0278034	0.112064	0.407	0.337	0.0364033
Vim	0.0279111	0.121216	0.995	0.994	0.0365052
2900097C17Rik	0.0279244	0.11148	0.656	0.623	0.0365052
Gps1	0.0279381	0.12185	0.865	0.836	0.0365052
Dhrs1	0.0280066	0.103277	0.542	0.433	0.03657
Shcbp1	0.0280468	0.129906	0.765	0.663	0.0365977
Bloc1s1	0.0280825	0.103983	0.452	0.348	0.0366051
Prpf38b	0.0280989	0.132527	0.818	0.762	0.0366051
Ppp2r1a	0.0281095	0.109714	0.816	0.72	0.0366051
Clk1	0.0282168	0.12561	0.815	0.793	0.03672
Dhx30	0.0282537	0.10464	0.517	0.433	0.0367431
Ranbp3	0.0282792	0.1067	0.481	0.416	0.0367515
Snx17	0.0283423	0.111808	0.819	0.745	0.0368014
Prdx5	0.0283558	0.101089	0.961	0.924	0.0368014
Zrsr2	0.0284246	0.113516	0.827	0.754	0.0368659
Strap	0.0285075	0.116831	0.903	0.873	0.036937
Scfd1	0.0285178	0.103761	0.604	0.484	0.036937
Cox19	0.0285484	0.106749	0.601	0.513	0.0369517
Eif3b	0.0286621	0.116841	0.771	0.708	0.037074
Cnn3	0.0287982	0.111887	0.918	0.884	0.037225
Commd10	0.0290541	0.106057	0.428	0.34	0.0375307
Aida	0.0291939	0.105903	0.568	0.482	0.037686
Ensa	0.0292634	0.109142	0.481	0.419	0.0377503
Cfap36	0.0293274	0.108855	0.675	0.575	0.0378076
Gart	0.0296425	0.106451	0.566	0.501	0.0381883
Ndufs8	0.029895	0.112111	0.895	0.839	0.0384878
Rps19bp1	0.0299728	0.107345	0.683	0.598	0.0385623
Ankrd17	0.0301973	0.118606	0.704	0.674	0.038816
Dcun1d5	0.0302104	0.110953	0.871	0.824	0.038816
Kifap3	0.0304586	0.109399	0.687	0.643	0.0391089
Taf6	0.0305831	0.102793	0.449	0.36	0.0392426
Snrpd1	0.030696	0.108145	0.994	0.992	0.0393612
Rassf1	0.0307377	0.109878	0.669	0.612	0.0393885
Prim1	0.0307949	0.129516	0.718	0.632	0.0394189
Ube3a	0.0308024	0.114926	0.891	0.864	0.0394189
Rnaseh2c	0.03086	0.115348	0.956	0.938	0.0394664
Twist1	0.0309049	0.137003	0.709	0.646	0.039497
Helz	0.0309249	0.102622	0.524	0.431	0.039497
Fopnl	0.0309575	0.110705	0.675	0.618	0.0395124
Jkamp	0.0310039	0.107643	0.66	0.592	0.0395453
Dnajc15	0.0310985	0.109714	0.716	0.663	0.0396398
Ntmt1	0.0312529	0.10393	0.622	0.518	0.0398102
Mydgf	0.0315252	0.113922	0.772	0.72	0.0401306
Pkig	0.0315728	0.108713	0.724	0.66	0.0401646
Gmds	0.0315959	0.10064	0.463	0.377	0.0401674
Krcc1	0.0317257	0.122632	0.692	0.635	0.0402987
Nfix	0.031741	0.11547	0.927	0.915	0.0402987
Ppp2r5e	0.0318594	0.102396	0.54	0.459	0.0403867
Bysl	0.0318698	0.106479	0.382	0.286	0.0403867
Gas6	0.0318903	0.157212	0.27	0.181	0.0403867
Psip1	0.0318942	0.109064	0.976	0.966	0.0403867
Dbnl	0.0319402	0.109714	0.662	0.581	0.0404184
Scarf2	0.0321773	0.11117	0.68	0.626	0.0406917
Zcchc7	0.0322263	0.10379	0.452	0.374	0.0407269
Supt4a	0.0322721	0.108486	0.841	0.751	0.040758
Snrnp40	0.0323288	0.109575	0.886	0.847	0.040803
Map2k3	0.0325074	0.102515	0.625	0.533	0.0410014
Wdr82	0.0326367	0.102284	0.551	0.448	0.0411308
1810022K09Rik	0.0326527	0.10993	0.869	0.796	0.0411308
Svbp	0.0326783	0.111312	0.836	0.796	0.0411362
Ssbp4	0.0327173	0.117682	0.898	0.89	0.0411584
Coprs	0.032804	0.100918	0.429	0.337	0.041231
4833439L19Rik	0.0328516	0.1048	0.41	0.312	0.041231
Birc5	0.0328742	0.166429	0.921	0.864	0.041231
Tbrg1	0.032881	0.114784	0.83	0.796	0.041231
Cyb5b	0.0328821	0.111345	0.513	0.448	0.041231
Hspa4	0.0329191	0.117084	0.879	0.788	0.0412506
Zfr	0.0330098	0.114052	0.654	0.609	0.0413276
Mob4	0.0330235	0.110337	0.804	0.734	0.0413276
Chchd7	0.0330678	0.102182	0.666	0.544	0.0413563
Zcchc8	0.0331057	0.102793	0.478	0.414	0.0413767
Hmgb2	0.0331807	0.149958	1	1	0.0414436
Gata6	0.0333997	0.11791	0.457	0.385	0.0416767
1110008F13Rik	0.0334138	0.107454	0.879	0.81	0.0416767
Hnrnph1	0.0334478	0.120544	0.914	0.912	0.0416767
Sf3b3	0.0334539	0.111075	0.813	0.785	0.0416767
Mogs	0.0335395	0.109655	0.631	0.584	0.0417564
Cxxc1	0.0337356	0.102323	0.574	0.484	0.0419734
Umps	0.0338935	0.109774	0.599	0.578	0.0421425
Atp2b1	0.0339651	0.140178	0.901	0.867	0.0422044
Eef1d	0.0340719	0.105773	0.994	0.992	0.0423098
Sema3a	0.0342551	0.120114	0.571	0.493	0.0425099
Dpm2	0.0343348	0.101167	0.501	0.436	0.0425813
Haus3	0.0343747	0.104437	0.555	0.493	0.0426034
Tram1	0.0344281	0.103241	0.495	0.397	0.0426422
Atg101	0.0345621	0.102279	0.615	0.53	0.0427806
Cdca8	0.0346752	0.163254	0.86	0.839	0.042893
Parva	0.0347178	0.109316	0.845	0.793	0.0429182
Bub3	0.0347835	0.138795	0.921	0.873	0.0429269
Nrk	0.0347908	0.121657	0.361	0.295	0.0429269
Mta2	0.0347918	0.102293	0.605	0.496	0.0429269
Hnrnpdl	0.0348356	0.128513	0.98	0.975	0.0429535
Pkmyt1	0.0348837	0.108521	0.367	0.261	0.0429851
Mcm3	0.0349059	0.155719	0.737	0.7	0.0429851
Dab2ip	0.0350263	0.102903	0.578	0.465	0.0431058
Ola1	0.0352647	0.111122	0.721	0.652	0.0433531
Pfdn6	0.0352722	0.107493	0.9	0.793	0.0433531
Vps29	0.0353232	0.108496	0.874	0.805	0.043388
Palld	0.0355343	0.15349	0.361	0.3	0.0436196
Obsl1	0.0355707	0.100047	0.49	0.402	0.0436364
Clcn4	0.0356602	0.104668	0.539	0.473	0.0437183
Ufsp2	0.0356898	0.10272	0.678	0.564	0.0437268
Sh3glb1	0.0358702	0.119428	0.939	0.921	0.0439199
Nop9	0.0361194	0.101245	0.448	0.363	0.0441869
Fam83d	0.0361554	0.144006	0.344	0.252	0.0441869
Capns1	0.0361571	0.105478	0.967	0.946	0.0441869
Ergic1	0.0364206	0.100199	0.513	0.422	0.0444807
Zfp560	0.036575	0.100767	0.41	0.337	0.0446162
Traip	0.0365778	0.108194	0.364	0.275	0.0446162
Pdxdc1	0.0366415	0.10077	0.571	0.484	0.0446656
N4bp2	0.0367503	0.108301	0.413	0.329	0.0447698
Gins2	0.036825	0.13473	0.719	0.643	0.0448324
4921524J17Rik	0.036971	0.101529	0.595	0.493	0.0449818
Scx	0.0371129	0.172944	0.255	0.19	0.0451259
Gar1	0.0373581	0.120971	0.785	0.739	0.0453954
Fxn	0.0374978	0.104787	0.574	0.487	0.0455364
Rhoc	0.0375342	0.115697	0.9	0.87	0.0455519
Dctn4	0.0375664	0.106867	0.719	0.66	0.0455564
Ly6h	0.0376168	0.137374	0.323	0.3	0.0455564
Rcn1	0.0376261	0.110182	0.962	0.949	0.0455564
Gsn	0.0376325	0.137263	0.772	0.728	0.0455564
Ints8	0.0376676	0.108832	0.335	0.244	0.0455703
Tcf15	0.0377237	0.115791	0.328	0.258	0.0456094
Cmpk1	0.0377823	0.113199	0.785	0.756	0.0456516
Crabp2	0.0378331	0.175713	0.264	0.17	0.0456844
Tnfaip8	0.0378614	0.11749	0.662	0.595	0.0456899
Tmem147	0.0379761	0.105543	0.762	0.677	0.0457996
Ttc4	0.0382266	0.101415	0.564	0.479	0.0460728
Ilf3	0.0383526	0.105545	0.693	0.567	0.0461958
Cdca5	0.0384854	0.109942	0.416	0.346	0.0463268
Hacd2	0.0385229	0.107296	0.525	0.45	0.046343
Scamp2	0.0386298	0.102298	0.36	0.266	0.0464425
Bzw2	0.0387663	0.108155	0.903	0.878	0.0465509
Itpa	0.0387682	0.103743	0.692	0.623	0.0465509
Coq2	0.0389645	0.100691	0.593	0.507	0.0467574
Gna11	0.039009	0.106229	0.792	0.728	0.0467817
Stag1	0.0390406	0.104872	0.783	0.742	0.0467904
Ncoa5	0.0390841	0.104202	0.37	0.286	0.0468134
Tril	0.0391404	0.117845	0.906	0.864	0.0468517
Mpc1	0.0391661	0.112659	0.895	0.853	0.0468534
E2f4	0.0392121	0.10044	0.483	0.394	0.0468793
Ppie	0.0393315	0.105036	0.672	0.609	0.0469474
Rab5a	0.0393486	0.100505	0.533	0.442	0.0469474
Ndufa3	0.0393833	0.10408	0.967	0.952	0.0469474
Appbp2	0.0394299	0.107305	0.678	0.626	0.0469474
Ogfr	0.0394411	0.10683	0.718	0.632	0.0469474
Atf1	0.0394468	0.105669	0.619	0.544	0.0469474
Srek1	0.0394574	0.109613	0.86	0.839	0.0469474
Zfp330	0.0394696	0.101105	0.651	0.575	0.0469474
Ttk	0.0394885	0.118462	0.534	0.439	0.0469474
Glrx5	0.0395899	0.114565	0.879	0.836	0.047039
Etaa1os	0.0397207	0.167692	0.238	0.085	0.0471653
CT025619.1	0.0397871	0.111259	0.439	0.357	0.0471957
Psrc1	0.0397953	0.130875	0.48	0.456	0.0471957
Lmo4	0.0398927	0.1133	0.778	0.759	0.047282
Orc2	0.0399952	0.101444	0.489	0.414	0.0473744
Ssb	0.040069	0.110019	0.989	0.994	0.0474327
Borcs8	0.0404229	0.102105	0.458	0.374	0.0478222
Txnip	0.0406532	0.10827	0.508	0.419	0.0480409
Snx6	0.0406576	0.107827	0.894	0.847	0.0480409
Hmces	0.0409339	0.102159	0.37	0.275	0.0483376
Alx1	0.0410197	0.159788	0.378	0.3	0.0484093
Emc10	0.0410902	0.107815	0.842	0.813	0.0484628
Scamp3	0.0411884	0.100037	0.61	0.516	0.0485489
Psmd9	0.0414271	0.10299	0.716	0.657	0.0488003
Selenom	0.0414578	0.115191	0.944	0.949	0.0488067
Ublcp1	0.0415927	0.103057	0.574	0.521	0.0489148
Zcchc3	0.0416004	0.107029	0.709	0.637	0.0489148
Gm16286	0.0418872	0.103983	0.816	0.782	0.0492219
Trim44	0.0423558	0.115653	0.783	0.739	0.0497422
Tubgcp3	0.0424106	0.101548	0.393	0.283	0.0497763
Elp6	0.0424589	0.104275	0.36	0.28	0.0498026
Msra	0.0427745	0.107906	0.341	0.258	0.0501422
Rae1	0.0431068	0.10151	0.71	0.64	0.0504919
Cdk11b	0.0431252	0.10522	0.792	0.711	0.0504919
Sh3bgrl	0.0431608	0.12105	0.889	0.833	0.0505029
Glyr1	0.0432254	0.104029	0.707	0.618	0.0505402
Gigyf2	0.0432452	0.102062	0.525	0.433	0.0505402
Specc1	0.0436256	0.103913	0.373	0.309	0.0509539
Mesd	0.0439487	0.104263	0.76	0.686	0.0512845
Kif20a	0.0439619	0.158009	0.566	0.524	0.0512845
Txndc17	0.0440066	0.107276	0.923	0.904	0.0513056
Bud31	0.0440873	0.103864	0.815	0.728	0.0513685
Rps6ka4	0.0441447	0.105573	0.338	0.252	0.0514043
Tmem97	0.0442541	0.109226	0.589	0.516	0.0515006
Camk2n2	0.0445713	0.116417	0.303	0.238	0.0518383
Cox7a2	0.0446917	0.101605	0.991	0.977	0.051947
Zmat2	0.0448106	0.10465	0.882	0.807	0.0520538
Mrps25	0.0448565	0.103641	0.744	0.686	0.0520757
Phgdh	0.0450222	0.118335	0.693	0.615	0.0522367
Trpc4ap	0.0451357	0.103926	0.533	0.462	0.0523368
0610010K14Rik	0.0453838	0.106579	0.651	0.572	0.0525927
Depdc1a	0.0454515	0.129834	0.563	0.524	0.0526315
Mt1	0.0454719	-0.117411	0.118	0.235	0.0526315
1700020I14Rik	0.04565	0.110564	0.737	0.683	0.0527899
Tmtc4	0.0456635	0.119601	0.322	0.261	0.0527899
Txlna	0.0457244	0.102099	0.651	0.586	0.0528285
Tspan6	0.0460361	0.104448	0.737	0.674	0.0531567
Eed	0.0460636	0.100875	0.548	0.47	0.0531567
Zeb1	0.0465423	0.124397	0.68	0.629	0.0536769
Mrps18c	0.0465714	0.101449	0.771	0.68	0.0536784
Utp3	0.0469871	0.105788	0.898	0.858	0.0541251
Xist	0.0470365	-0.2844	0.343	0.487	0.0541496
Glo1	0.0471198	0.103882	0.847	0.856	0.0542131
Tgif1	0.0471878	0.112377	0.314	0.224	0.0542531
Irf2bpl	0.0472109	0.10427	0.672	0.586	0.0542531
Cdkn3	0.0472424	0.159863	0.492	0.45	0.0542569
Rbfox2	0.047459	0.10494	0.821	0.745	0.0544732
Tcaf1	0.0476291	0.111719	0.675	0.626	0.0546359
Immt	0.0477174	0.106687	0.903	0.856	0.0547046
Smarca5	0.0478059	0.10625	0.956	0.924	0.0547735
Mrpl19	0.048094	0.100308	0.627	0.547	0.0550605
Cops2	0.0481136	0.103711	0.686	0.637	0.0550605
Slc25a11	0.0482694	0.102103	0.803	0.745	0.055206
Actl6a	0.0483567	0.10824	0.857	0.805	0.0552518
Hoxb2	0.0483669	0.104152	0.537	0.479	0.0552518
Tmem208	0.0484791	0.101764	0.722	0.646	0.0553473
Kctd5	0.0488868	0.100177	0.361	0.272	0.0557796
Socs6	0.0489766	0.103083	0.335	0.246	0.0558224
Bub1	0.0490666	0.119407	0.645	0.606	0.0558224
Fzd2	0.0490792	0.121255	0.809	0.756	0.0558224
Edf1	0.0491093	0.100527	0.97	0.938	0.0558224
Vmp1	0.0491116	0.102065	0.706	0.674	0.0558224
Ugp2	0.0491194	0.106279	0.683	0.62	0.0558224
Lars	0.0491272	0.105234	0.642	0.592	0.0558224
Pttg1ip	0.0492485	0.103199	0.555	0.49	0.0559272
Polr2d	0.0493051	0.101202	0.737	0.717	0.0559586
Vstm4	0.0494183	0.112738	0.539	0.507	0.056054
Tbce	0.0495684	0.109093	0.317	0.232	0.0561911
Fyttd1	0.0497577	0.104838	0.73	0.652	0.0563275
Acyp2	0.0497668	0.101327	0.461	0.377	0.0563275
Mfge8	0.0497764	0.132129	0.883	0.83	0.0563275
Farsa	0.0502065	0.100339	0.612	0.561	0.0567808
Rrp15	0.0503984	0.104557	0.577	0.516	0.0569643
Adamtsl1	0.0504685	0.122552	0.335	0.275	0.0570101
Tmem50a	0.050659	0.100191	0.883	0.824	0.0571738
Ppp2r2a	0.050696	0.102517	0.819	0.722	0.0571738
Zfp280d	0.0507024	0.102087	0.58	0.547	0.0571738
Lsm14a	0.0508041	0.100922	0.692	0.603	0.0572549
Psmd13	0.0509933	0.107118	0.898	0.895	0.0574346
Rps27l	0.0511829	0.101498	0.983	0.989	0.0576145
Btg2	0.0513051	-0.101308	0.639	0.657	0.0577183
Aurkb	0.0516121	0.148994	0.756	0.68	0.0580297
Cdc42bpa	0.0518266	0.101789	0.517	0.445	0.0581731
Sumo3	0.0518354	0.106173	0.894	0.878	0.0581731
Eif4e3	0.0518489	0.103915	0.398	0.295	0.0581731
Rab6a	0.0518604	0.10726	0.692	0.635	0.0581731
Ndufv2	0.0519388	0.102388	0.965	0.952	0.0582271
Hddc2	0.0522369	0.104078	0.675	0.572	0.0585272
Aco1	0.0526405	0.102211	0.375	0.306	0.0589451
Pcolce	0.0529014	0.11017	0.781	0.717	0.0592028
Coq7	0.0530008	0.107288	0.857	0.816	0.0592796
Sart1	0.0530412	0.100057	0.531	0.487	0.0592904
Nudt4	0.0534077	0.114069	0.713	0.632	0.0596655
Cavin3	0.053752	0.118591	0.401	0.32	0.0600153
Mtx2	0.0539936	0.10159	0.853	0.807	0.0602489
Mrpl30	0.0540238	0.102931	0.88	0.864	0.0602489
Luc7l2	0.0541087	0.108228	0.948	0.938	0.0603086
Naxd	0.0541974	0.104668	0.677	0.629	0.0603726
Tgfbi	0.0545534	0.128552	0.85	0.799	0.060734
Brd3	0.054625	0.109	0.863	0.839	0.0607786
Etl4	0.0547577	0.104026	0.63	0.575	0.0608716
Rab26os	0.0547718	0.113542	0.3	0.212	0.0608716
Serpinb6a	0.0548748	0.122659	0.734	0.66	0.060944
Uqcrfs1	0.0549002	0.105305	0.873	0.844	0.060944
Timp1	0.0549725	0.107242	0.346	0.258	0.0609891
Paics	0.0552017	0.106901	0.877	0.841	0.0612081
Snai1	0.0554849	0.105933	0.388	0.329	0.0614867
Copz2	0.05591	0.104712	0.774	0.742	0.0619221
Igfbp3	0.0561942	0.146616	0.511	0.518	0.0622011
Nucks1	0.0562602	0.134064	0.991	0.989	0.0622385
Cuedc2	0.0562999	0.10395	0.844	0.796	0.0622466
Lef1	0.0563502	0.158094	0.222	0.122	0.0622633
Uhrf2	0.0563796	0.106405	0.795	0.731	0.0622633
Degs1	0.0565092	0.101842	0.745	0.708	0.0623444
Crip1	0.0565178	0.128956	0.593	0.578	0.0623444
Terf1	0.0566373	0.104824	0.622	0.544	0.0624167
Chaf1a	0.0566615	0.103354	0.651	0.581	0.0624167
Fam204a	0.0566806	0.100047	0.675	0.592	0.0624167
Plk4	0.0569876	0.107256	0.734	0.68	0.0627189
Tmod3	0.0571662	0.10916	0.827	0.807	0.0628795
Dtymk	0.0573708	0.112909	0.936	0.907	0.0630355
Brk1	0.0573735	0.107716	0.904	0.875	0.0630355
C1d	0.0575938	0.103983	0.892	0.802	0.0632415
Golga7	0.0576492	0.101181	0.759	0.677	0.0632663
Rbms1	0.0580023	0.104437	0.876	0.839	0.0636175
Cox20	0.0584095	0.10589	0.83	0.79	0.0640277
Sh3bgrl3	0.0587206	0.100047	0.933	0.887	0.0643321
Avl9	0.0596154	0.108986	0.31	0.207	0.0652753
Zfp846	0.0596789	0.117134	0.281	0.198	0.0653078
Olfm1	0.0598175	0.102736	0.475	0.408	0.0654222
Abhd17c	0.0599974	0.108602	0.302	0.19	0.0655817
Bora	0.0600539	0.129879	0.599	0.507	0.0656062
Foxc2	0.0601226	0.103424	0.618	0.555	0.0656441
Srsf1	0.0602216	0.102504	0.832	0.785	0.0657149
Fasn	0.0604916	0.105104	0.326	0.249	0.0659721
Tbx3	0.0613603	0.100428	0.378	0.317	0.0668817
Cops9	0.0618184	0.100247	0.894	0.87	0.0673429
Xbp1	0.0619543	0.114495	0.744	0.705	0.0674174
Spc25	0.0619568	0.142541	0.898	0.856	0.0674174
Dnajc8	0.0620916	0.109095	0.953	0.946	0.067526
Aspm	0.0623455	0.151809	0.542	0.473	0.0677638
Dscc1	0.0632383	0.109497	0.425	0.351	0.0686954
Dbr1	0.0649313	0.115089	0.27	0.178	0.0704948
Ocrl	0.065373	0.105653	0.322	0.227	0.0709343
Ankrd11	0.0654519	0.101177	0.948	0.935	0.0709733
Fmr1	0.0654826	0.101224	0.709	0.62	0.0709733
Cndp2	0.0656412	0.10459	0.326	0.235	0.0711051
Fblim1	0.0657695	0.106163	0.608	0.561	0.0712041
Csrp2	0.0671337	0.104645	0.894	0.858	0.0726168
Cenpl	0.0671498	0.10392	0.442	0.351	0.0726168
Hells	0.0671886	0.132658	0.668	0.615	0.0726179
Ubap1	0.0675107	0.101971	0.328	0.224	0.0729251
Gnl3l	0.0676027	0.10098	0.335	0.238	0.0729669
Uba2	0.0676251	0.10594	0.92	0.89	0.0729669
Cenpc1	0.068018	0.102483	0.561	0.45	0.0733497
Pgrmc1	0.0685311	0.113424	0.851	0.824	0.0738617
Safb	0.0690231	0.104941	0.765	0.72	0.0743345
Rab34	0.069047	0.100287	0.8	0.788	0.0743345
Fip1l1	0.0692951	0.105526	0.836	0.813	0.07456
Ckap2l	0.0697465	0.133002	0.754	0.683	0.0750037
Aldh2	0.0699031	0.110831	0.95	0.929	0.0751303
Adgrl2	0.0706924	0.118372	0.584	0.569	0.0759361
Cope	0.0707769	0.101275	0.912	0.904	0.0759845
Idi1	0.0710106	0.140671	0.238	0.15	0.076193
Ctcf	0.071678	0.113853	0.938	0.929	0.0768484
Bccip	0.0717012	0.100938	0.818	0.759	0.0768484
Thra	0.0718343	0.102006	0.819	0.768	0.0769481
Prpf4b	0.0719045	0.108538	0.942	0.921	0.0769571
Clspn	0.0719225	0.109588	0.706	0.663	0.0769571
Mki67	0.0721208	0.164568	0.869	0.85	0.0771264
Nav2	0.0728805	0.101916	0.379	0.303	0.0778956
Thrap3	0.0738161	0.104831	0.917	0.898	0.0788518
Tagln2	0.0741093	0.113826	0.95	0.952	0.0791211
Cpsf6	0.0743802	0.101944	0.839	0.799	0.0793663
Idh1	0.0744311	0.10323	0.323	0.224	0.0793767
Lca5	0.0750536	0.124626	0.255	0.147	0.0799962
Rap1b	0.0751319	0.10113	0.859	0.816	0.0800338
Arl16	0.0751719	0.104138	0.31	0.232	0.0800338
Melk	0.0752238	0.10886	0.684	0.62	0.0800447
Chaf1b	0.0764008	0.120851	0.504	0.442	0.0812523
S100a10	0.0765474	0.138125	0.971	0.955	0.0813633
Incenp	0.0767302	0.148689	0.769	0.72	0.0815127
Hoxc8	0.0772436	0.1042	0.657	0.595	0.0820128
Hmmr	0.0775449	0.146081	0.721	0.671	0.0822873
Ipo11	0.0775916	0.1027	0.434	0.326	0.0822916
Nid1	0.0777702	0.116315	0.824	0.756	0.0824356
Tnrc6b	0.0807405	0.100162	0.716	0.654	0.085537
Ppp1r12a	0.080852	0.100581	0.832	0.79	0.085608
Pkm	0.0813365	0.124769	0.989	0.997	0.0860737
Supt16	0.0822121	0.107761	0.92	0.901	0.0869525
Mpzl1	0.0833496	0.101599	0.674	0.64	0.0881072
Fbn2	0.0848736	0.119756	0.851	0.827	0.0896689
Gpc3	0.0852332	0.104203	0.992	0.989	0.0899996
Tmpo	0.0856109	0.117951	0.98	0.952	0.0903488
Sgo2a	0.087239	0.120564	0.697	0.603	0.0919717
BC017643	0.0872441	0.103418	0.293	0.187	0.0919717
Mcu	0.0887275	0.111739	0.287	0.19	0.0934843
Mrto4	0.0887933	0.104061	0.718	0.688	0.0935024
Crip2	0.0896383	0.104084	0.508	0.45	0.0943407
Cdo1	0.089796	0.117359	0.241	0.184	0.094455
Rad21	0.0905953	0.111281	0.844	0.805	0.0952438
Fam173b	0.0912978	0.100886	0.313	0.207	0.09593
Jmjd8	0.0920628	0.103338	0.284	0.19	0.096681
Bok	0.0923989	0.137458	0.621	0.544	0.0969811
Rad51ap1	0.0935341	0.106723	0.693	0.618	0.0981191
Eif2s2	0.0943609	0.103824	0.994	0.983	0.0989325
Tacc3	0.0954152	0.142448	0.751	0.714	0.0999835
H2afx	0.0957875	0.150383	0.965	0.943	0.100319
Hist1h4h	0.0967208	0.134274	0.472	0.433	0.101241
Aff4	0.0979452	0.104226	0.619	0.569	0.102467
Lsm11	0.10088	0.101682	0.294	0.201	0.10548
Mios	0.101622	0.10287	0.285	0.204	0.106198
Hist1h2bb	0.101818	0.130232	0.232	0.133	0.106346
Ccna2	0.10295	0.141073	0.851	0.793	0.107469
Lsm5	0.103005	0.100107	0.898	0.864	0.107469
Lbhd2	0.104109	0.121164	0.369	0.32	0.108562
Rasgrp2	0.10473	0.102337	0.772	0.717	0.10915
Bud13	0.105153	0.102363	0.284	0.181	0.109532
Itm2a	0.111746	0.105288	0.42	0.391	0.116337
2810474O19Rik	0.112387	0.118927	0.742	0.739	0.116941
Sfxn2	0.112487	0.110277	0.267	0.17	0.116982
Ets1	0.114231	0.103241	0.634	0.578	0.118731
Rpa2	0.114401	0.107106	0.713	0.64	0.118844
Cox16	0.115231	0.104963	0.269	0.184	0.119641
Snai2	0.11652	0.139157	0.813	0.822	0.120914
Aplp2	0.119015	0.101049	0.889	0.87	0.123437
Actn1	0.119344	0.100871	0.885	0.858	0.123712
Postn	0.123342	0.140449	0.243	0.207	0.127788
Bex2	0.123848	0.178729	0.404	0.365	0.128242
Crebrf	0.127312	-0.114348	0.09	0.195	0.131758
Ezh2	0.132722	0.101639	0.918	0.915	0.137284
H1fx	0.136014	0.11426	0.988	0.975	0.140614
Ankle1	0.138503	0.10461	0.281	0.19	0.143072
Ahcy	0.13854	0.113343	0.241	0.142	0.143072
Lockd	0.142716	0.124088	0.686	0.623	0.147305
Gadd45g	0.143072	0.101187	0.281	0.198	0.147594
Cntln	0.143411	0.108944	0.775	0.751	0.147863
Cenpf	0.144392	0.175501	0.78	0.759	0.148795
Ccnb1	0.145628	0.184335	0.719	0.635	0.149989
Ier5	0.147952	0.104879	0.709	0.66	0.152301
Cks2	0.149427	0.134921	0.93	0.892	0.153737
Rfc2	0.151482	0.100598	0.813	0.782	0.155769
Igf1	0.153277	0.201536	0.158	0.054	0.15753
Meis1	0.153478	0.106375	0.926	0.892	0.157653
Cdkn2d	0.161121	0.116279	0.672	0.635	0.165415
Tpx2	0.161562	0.132975	0.781	0.759	0.16578
Ndc80	0.163155	0.109031	0.689	0.632	0.167325
2610318N02Rik	0.163958	0.110564	0.247	0.156	0.168059
Tcf4	0.165481	0.101842	0.836	0.807	0.16953
Nde1	0.167032	0.11421	0.734	0.705	0.171028
Plagl1	0.167753	0.101983	0.724	0.725	0.171675
Mis18bp1	0.168087	0.117988	0.639	0.623	0.171926
Hist2h2ac	0.168503	0.117063	0.543	0.501	0.172259
Ccnd1	0.170216	0.110669	0.624	0.561	0.173918
Tubb4b	0.177973	0.140059	0.982	0.955	0.181747
Mvd	0.179274	0.122563	0.209	0.116	0.182979
Pbk	0.180704	0.105061	0.742	0.652	0.184341
Cldn11	0.183758	0.1198	0.287	0.246	0.187357
Kif20b	0.18677	0.108423	0.701	0.637	0.190328
Plpp3	0.199615	0.103204	0.252	0.224	0.203309
Thbs2	0.201416	0.105526	0.188	0.15	0.205036
Mfap5	0.202031	0.151052	0.178	0.15	0.205553
Gm29771	0.206793	0.121321	0.202	0.142	0.210287
Tpr	0.20804	0.100742	0.98	0.963	0.211443
Anln	0.210464	0.104676	0.633	0.603	0.213795
Trps1	0.216648	0.100468	0.214	0.178	0.219959
Ccnb2	0.216766	0.121049	0.801	0.745	0.219964
Msmo1	0.217788	0.110182	0.215	0.147	0.220885
Ckap2	0.218753	0.111181	0.668	0.615	0.221746
Hist1h1b	0.234947	0.138499	0.827	0.776	0.238036
Nrp2	0.237905	0.121743	0.193	0.142	0.240906
Serpinb1a	0.23822	0.111797	0.203	0.144	0.241099
Gm16152	0.250346	0.146409	0.17	0.034	0.253239
Plvap	0.263897	0.142274	0.158	0.088	0.266806
Srgap1	0.269199	0.102876	0.211	0.127	0.272023
Ube2c	0.270528	0.159641	0.83	0.79	0.273223
Clu	0.271692	-0.145639	0.08	0.119	0.274255
Emp1	0.299989	0.100729	0.701	0.654	0.30266
Hmga1	0.304968	0.106256	0.199	0.108	0.307523
Gm20045	0.305141	0.117318	0.184	0.096	0.307536
Slfn8	0.307832	0.108797	0.187	0.091	0.310086
Sfrp2	0.343295	0.124981	0.138	0.113	0.345628
H1f0	0.343783	0.10071	0.92	0.946	0.345808
Npnt	0.343833	-0.10058	0.086	0.122	0.345808
Adamts2	0.347531	0.117198	0.155	0.082	0.349344
Crabp1	0.372704	0.110391	0.2	0.144	0.374454
Lypd1	0.378237	0.11547	0.156	0.079	0.379814
Cd34	0.397581	0.108016	0.161	0.096	0.399031
Uchl1	0.401232	0.114384	0.158	0.057	0.402486
Hist1h2br	0.406487	0.107211	0.167	0.082	0.407545
Col23a1	0.40715	0.100529	0.147	0.119	0.407998
Ldlr	0.415636	0.109613	0.155	0.096	0.416285
Slc9a5	0.470521	0.10151	0.161	0.065	0.471011
Depdc1b	0.474773	0.110673	0.149	0.054	0.47502
Rgs7bp	0.486212	0.121397	0.131	0.042	0.486212
Fabp4	NA	0.155903	0.334	0.331	NA

## Sheet: Stroma_cluster1.MutVsCTRL.DEGs
Gene	p_val	avg_logFC	pct.1	pct.2	p_val_adj
Gm10260	4.15e-63	1.49415	0.569	0.004	6.63e-60
Cdkn1c	6.69e-19	0.739981	0.995	0.981	1.78e-16
Nts	NA	0.705503	0.121	0.054	NA
Hist1h2ap	NA	0.606566	0.626	0.304	NA
Basp1	2.04e-23	0.594273	0.998	0.973	9.3e-21
Uba52	4.62e-46	0.59412	0.99	0.938	3.69e-43
Tpm3-rs7	1.43e-30	0.590925	0.591	0.066	7.6e-28
Acta2	2.26e-06	0.557593	0.916	0.825	5.82e-05
Dcn	9.05e-06	0.552767	0.692	0.541	0.000180475
Hmgcs1	1.02e-12	0.517001	0.591	0.339	1.05e-10
Fdps	3.43e-11	0.510165	0.559	0.323	2.83e-09
Fn1	2.28e-12	0.483346	0.953	0.864	2.21e-10
Tpm1	5.21e-10	0.471014	0.946	0.872	3.54e-08
Eif3j1	5.91e-17	0.469073	0.798	0.436	1.31e-14
Col1a1	3.49e-11	0.468463	0.978	0.961	2.83e-09
Pfn2	8.48e-08	0.452848	0.505	0.358	3.23e-06
Tubb4b	9.95e-07	0.45089	0.921	0.809	2.81e-05
Il11ra1	1.07e-13	0.446378	0.732	0.428	1.37e-11
Pdia6	2.02e-17	0.43633	0.993	0.988	4.97e-15
Alx1	1.37e-07	0.435593	0.549	0.354	5.02e-06
Col15a1	4.02e-05	0.433834	0.35	0.218	0.000634723
Erh	7.92e-17	0.42755	0.98	0.868	1.58e-14
Stmn1	6.04e-09	0.427222	0.995	0.946	3.16e-07
Pdgfra	3.54e-11	0.423561	0.877	0.681	2.83e-09
Maged1	6.14e-17	0.423398	0.99	0.942	1.31e-14
Hspa8	2.37e-21	0.42325	1	1	9.45e-19
Tagln	0.000321672	0.416707	0.527	0.385	0.00323088
Arf5	6.12e-21	0.412898	0.99	0.988	1.96e-18
Myl9	7.25e-07	0.41164	0.948	0.907	2.13e-05
Tuba1a	2.24e-09	0.410223	0.995	0.965	1.3e-07
Alcam	5.21e-06	0.408782	0.951	0.833	0.000115569
Igfbp5	NA	0.40861	0.392	0.245	NA
Gm10076	5.74e-15	0.408303	0.941	0.848	9.17e-13
Mpp6	6.55e-11	0.407464	0.803	0.665	4.98e-09
Pclaf	4.61e-06	0.406923	0.554	0.401	0.000105104
H2afz	4.61e-07	0.405438	1	1	1.48e-05
Actg1	4.36e-19	0.405141	1	1	1.26e-16
Rbp1	1.29e-15	0.404556	0.993	0.961	2.29e-13
Lum	0.000215822	0.403557	0.241	0.117	0.00237702
Selenow	4.88e-21	0.403151	0.995	0.984	1.73e-18
Palld	8.52e-07	0.402924	0.549	0.389	2.45e-05
Nr2f1	2.1e-10	0.394821	0.579	0.335	1.49e-08
Hsp90b1	3.11e-09	0.393454	0.993	0.981	1.74e-07
Rps2	5.13e-48	0.39168	1	1	5.46e-45
Col3a1	2.93e-08	0.383472	0.995	1	1.36e-06
Nnat	6.13e-08	0.382198	0.411	0.202	2.58e-06
Apoe	6.96e-10	0.38203	0.517	0.3	4.44e-08
Csrp1	6.97e-08	0.377381	0.924	0.829	2.84e-06
Fam32a	5.6e-11	0.367312	0.8	0.588	4.36e-09
Penk	0.0802104	0.364591	0.741	0.735	0.165673
Ncam1	0.000100548	0.363855	0.773	0.658	0.0012846
Srsf2	6.19e-10	0.362363	0.97	0.903	4.04e-08
Tubb5	1.39e-14	0.360129	1	1	2.12e-12
H2afx	3.61e-05	0.357206	0.675	0.518	0.000600817
Cnn2	3.89e-07	0.357147	0.966	0.946	1.27e-05
Mest	6.15e-05	0.35259	0.99	0.961	0.000873325
Mtch1	7.97e-11	0.351028	0.975	0.926	5.92e-09
Kcnq1ot1	0.000938543	0.347781	0.951	0.903	0.00718874
mt-Cytb	2.27e-14	0.347385	0.998	0.996	3.3e-12
Cox5b	3.04e-11	0.346896	0.98	0.965	2.7e-09
Hnrnpa3	3.88e-09	0.346263	0.995	0.984	2.07e-07
Akr1a1	9.56e-11	0.345665	0.983	0.961	6.94e-09
Dnaja1	9.78e-10	0.343541	0.988	0.953	6.13e-08
Ndufa4	2.23e-11	0.34241	0.993	0.996	2.03e-09
Hmgn2	2.19e-07	0.342293	0.988	0.969	7.51e-06
Anxa6	2.79e-09	0.341985	0.929	0.84	1.59e-07
Nav3	0.000159978	0.336809	0.315	0.14	0.0019066
Dbi	1.31e-08	0.335598	0.961	0.911	6.44e-07
Tmsb4x	7.4e-08	0.334484	1	1	2.92e-06
Ccar1	1.47e-07	0.333967	0.869	0.704	5.33e-06
Mfap2	1.83e-07	0.333147	0.973	0.914	6.41e-06
Tpm2	2.79e-06	0.332893	0.985	0.961	6.95e-05
Lmnb1	3.51e-06	0.330162	0.865	0.747	8.44e-05
Tmsb10	5.56e-15	0.329804	1	1	9.17e-13
Mfap4	0.00112339	0.329578	0.781	0.724	0.00814959
Ywhah	1.95e-07	0.32951	0.874	0.763	6.75e-06
Thy1	0.00109597	0.328561	0.281	0.07	0.00804722
Atp5k	2.21e-11	0.328124	1	0.977	2.03e-09
Cfl1	2.44e-13	0.328091	1	0.996	3e-11
Raly	3.25e-08	0.327284	0.958	0.887	1.47e-06
Rtn4	7.57e-08	0.326915	0.929	0.856	2.95e-06
Ccne1	6.47e-06	0.325835	0.384	0.202	0.0001397
H2afv	4.88e-07	0.325156	0.995	0.984	1.54e-05
Snrpg	8.75e-09	0.324686	0.963	0.883	4.37e-07
Enho	2.59e-08	0.323434	0.569	0.335	1.22e-06
Peg3	0.000899903	0.322491	0.901	0.856	0.00697643
Tubb2b	9.96e-06	0.322395	0.416	0.237	0.000195135
Maged2	7.13e-08	0.32205	0.995	0.996	2.84e-06
Bzw2	4.93e-06	0.321982	0.852	0.821	0.000110797
Hmgcr	1.36e-06	0.321849	0.419	0.198	3.77e-05
Ap1s1	8.07e-08	0.321213	0.837	0.626	3.1e-06
Smoc2	0.197084	0.321144	0.143	0.027	0.298618
Pkdcc	0.000334367	0.321106	0.953	0.899	0.0033064
Tmem176b	5.25e-05	0.320388	0.803	0.673	0.000769728
Calm1	5.11e-08	0.319431	1	0.996	2.17e-06
Rrbp1	5.81e-06	0.318989	0.973	0.957	0.000127178
Gsn	5.11e-05	0.31867	0.776	0.654	0.00075189
Tra2b	2.59e-07	0.3186	0.926	0.809	8.71e-06
Bgn	3.77e-06	0.318383	0.966	0.918	8.8e-05
Txnl1	4.71e-08	0.318273	0.933	0.852	2.06e-06
Cks1b	2.01e-06	0.317997	0.761	0.638	5.27e-05
Col1a2	2.82e-06	0.317838	0.998	0.996	6.97e-05
Wdfy1	1.9e-08	0.316659	0.453	0.183	9.07e-07
Meg3	0.00283286	0.315913	0.897	0.774	0.0165414
Manf	6.83e-06	0.315451	0.894	0.763	0.0001444
Mcm3	4.05e-05	0.315244	0.601	0.436	0.000634723
Ogfrl1	0.000220383	0.31355	0.584	0.459	0.00241063
P4hb	6.96e-07	0.313465	0.911	0.837	2.08e-05
Anxa2	8.13e-07	0.312472	0.995	0.992	2.36e-05
Sec61g	1.65e-09	0.312195	1	0.996	9.94e-08
Atp2b1	0.000511525	0.311395	0.879	0.84	0.00462836
Ciapin1	1.84e-08	0.3112	0.675	0.424	8.92e-07
Chd3	6.84e-07	0.310196	0.946	0.907	2.06e-05
Ssr2	1.7e-07	0.310079	0.963	0.914	6.09e-06
Eif4a3	1.82e-07	0.309014	0.815	0.716	6.41e-06
Sfpq	2.67e-05	0.30899	0.966	0.895	0.00046564
Marcksl1	7.06e-08	0.308915	0.98	0.973	2.84e-06
Tubb6	6.67e-06	0.306757	0.581	0.409	0.000142952
Hoxc10	6.08e-07	0.306607	0.798	0.669	1.85e-05
Arl4a	0.0006652	0.306488	0.621	0.51	0.00562077
Selenoh	6.97e-05	0.305867	0.933	0.837	0.000969005
Tshz2	0.000518901	0.305509	0.877	0.821	0.00466957
Ckb	0.000841446	0.305408	0.704	0.638	0.00669063
Eif1	9.37e-13	0.304847	1	1	9.98e-11
Scd2	3.77e-06	0.303821	0.702	0.564	8.8e-05
Tsc22d1	3.43e-06	0.303579	0.931	0.868	8.36e-05
Srrt	5.14e-07	0.303336	0.663	0.424	1.58e-05
Gipc1	4.65e-07	0.302561	0.823	0.65	1.48e-05
Pebp1	5.88e-10	0.302463	0.993	0.996	3.91e-08
Clmp	2.5e-06	0.301467	0.741	0.576	6.4e-05
Cyp51	1.62e-05	0.301424	0.463	0.241	0.000294774
Psmb3	1.01e-06	0.300946	0.951	0.887	2.82e-05
Ddost	3.8e-07	0.300818	0.951	0.907	1.25e-05
Flrt2	4.92e-05	0.30067	0.591	0.486	0.000734506
Dlk1	0.0356568	0.300487	0.35	0.327	0.0980102
Ppia	3.8e-13	0.300015	1	1	4.49e-11
Fth1	8.42e-13	0.299998	0.998	1	9.28e-11
Fkbp1a	1.49e-06	0.298909	0.983	0.969	4.07e-05
Hspa5	9.56e-05	0.298852	0.99	0.984	0.00124062
Hoxd11	1.14e-05	0.298828	0.916	0.817	0.000217996
Srsf3	3.75e-06	0.297769	0.993	0.981	8.8e-05
Pmvk	1.12e-07	0.297521	0.626	0.377	4.22e-06
Dnm3os	2.74e-06	0.296372	0.709	0.51	6.94e-05
Ptma	1.34e-09	0.295558	1	1	8.26e-08
Hmgb2	0.0162893	0.294815	0.936	0.907	0.0557044
Fbxl7	0.000636252	0.293835	0.746	0.673	0.00545252
Tmed9	1.52e-06	0.293434	0.966	0.961	4.09e-05
Oaz1	1.76e-09	0.292332	1	0.996	1.04e-07
Igfbp4	4.08e-05	0.292236	0.978	0.981	0.00063531
Cxcl12	0.0784531	0.29216	0.461	0.366	0.163137
Vcp	5e-07	0.292006	0.993	0.961	1.57e-05
Serpinh1	6.65e-09	0.291428	1	1	3.37e-07
Mdk	3.21e-06	0.291239	0.998	1	7.9e-05
Atxn7l3b	2.41e-07	0.291174	0.988	0.973	8.19e-06
Srsf6	1.66e-06	0.290905	0.884	0.774	4.37e-05
Vim	4.99e-06	0.290852	0.998	1	0.000111557
Actb	3.73e-09	0.290786	1	1	2.02e-07
Ccnd1	0.0118585	0.290723	0.599	0.568	0.0447179
Itga9	5.97e-06	0.29069	0.786	0.65	0.000129696
Anxa5	2.15e-06	0.29002	0.975	0.942	5.57e-05
Sfrp1	0.012652	0.289269	0.911	0.844	0.0465023
Eif5	3.67e-05	0.28897	0.901	0.829	0.000607169
Fbn1	4.21e-05	0.288415	0.7	0.611	0.00065232
Isyna1	9.68e-05	0.288397	0.695	0.588	0.00125215
Hsp90aa1	8.67e-06	0.287367	0.983	0.965	0.000174248
Cox7c	6.44e-08	0.287363	0.998	0.981	2.67e-06
Ccnd2	0.00335377	0.286344	0.983	0.977	0.0185328
Tyms	6.02e-05	0.285702	0.485	0.339	0.00085843
Tubb2a	4.23e-05	0.285234	0.542	0.397	0.000652767
Cenpa	0.0342561	0.285044	0.429	0.292	0.0949773
Oxct1	2.79e-05	0.285025	0.924	0.879	0.000485166
Foxd1	0.329039	0.284848	0.421	0.393	0.40703
Trim35	1e-05	0.283574	0.793	0.646	0.000195442
Mvk	9.02e-07	0.283284	0.567	0.35	2.57e-05
Ybx1	4.86e-08	0.282561	1	0.996	2.1e-06
Sox4	0.000165885	0.282151	0.963	0.953	0.00195512
Psmb6	4.84e-06	0.281944	0.988	0.961	0.000109744
Zfp503	0.000208968	0.281023	0.823	0.696	0.00232559
Rcn3	6.81e-06	0.280646	0.985	0.949	0.0001444
Tia1	6.88e-05	0.280249	0.766	0.63	0.00096315
Ywhaq	1.47e-06	0.280143	0.993	0.969	4.05e-05
Phldb2	1.08e-05	0.27978	0.544	0.366	0.000209864
Smc6	3.16e-05	0.279495	0.815	0.728	0.000536711
Polr2m	3.23e-05	0.279447	0.958	0.907	0.000543439
Son	4.42e-06	0.279399	0.985	0.973	0.000101458
Pbx1	0.00104356	0.278644	0.988	0.961	0.00774832
Oat	2.37e-05	0.278551	0.869	0.774	0.000420993
Tmem234	9.1e-06	0.278338	0.879	0.79	0.000180475
Sec62	1.33e-05	0.278029	0.97	0.953	0.000250096
Dek	0.000319153	0.27781	0.943	0.891	0.00323088
Col26a1	3.71e-06	0.277237	0.512	0.315	8.8e-05
Dynll1	0.000350696	0.277225	0.995	0.992	0.0034391
Hnrnpm	1.36e-05	0.277139	0.975	0.957	0.000254045
Zeb2	0.000326495	0.27712	0.98	0.965	0.00324868
G3bp2	7.56e-06	0.277005	0.746	0.553	0.000155808
Ubl5	1.46e-05	0.276907	0.941	0.868	0.000269138
Mylk	0.00151827	0.276798	0.823	0.732	0.0102307
Prpf40a	2.19e-05	0.275274	0.877	0.774	0.0003937
Cd24a	0.0013114	0.275091	0.618	0.459	0.00922602
Ckap4	0.000121198	0.27507	0.924	0.875	0.00151582
Tbcb	1.49e-05	0.274927	0.879	0.786	0.000273525
Cdh11	4.69e-05	0.274318	0.97	0.942	0.000712924
Cfl2	2.24e-05	0.272042	0.862	0.696	0.000400533
Dnajb11	9.4e-06	0.27168	0.724	0.537	0.000185378
Srp19	1.69e-05	0.270961	0.892	0.778	0.000306448
Esd	7.25e-06	0.270731	0.98	0.961	0.000152384
Wdr83os	3.22e-05	0.270565	0.83	0.712	0.000543439
Atp5a1	2.76e-06	0.270329	0.998	1	6.94e-05
Tmem167	3.37e-05	0.270283	0.919	0.805	0.000563477
Dnmt1	5.01e-05	0.270129	0.463	0.292	0.000744864
Sfr1	4.9e-05	0.269926	0.988	0.957	0.000734506
Rbm3	7.27e-07	0.269582	1	0.992	2.13e-05
H2afy	1.18e-05	0.269085	0.978	0.914	0.000224053
Sqle	0.000240097	0.269056	0.357	0.179	0.00258205
Ube2n	5.08e-05	0.268994	0.901	0.809	0.000750466
Blmh	3.91e-05	0.267619	0.847	0.767	0.000627114
Aes	0.00780742	0.267418	0.628	0.591	0.0337996
Efnb1	1.43e-05	0.267213	0.606	0.455	0.000266438
mt-Nd4	3.49e-07	0.267209	0.995	0.996	1.16e-05
Smarce1	4.79e-05	0.266329	0.901	0.852	0.000725508
Dclk1	0.00505194	0.266316	0.34	0.237	0.0247039
Cdv3	8.6e-05	0.265762	0.877	0.786	0.00114892
Lgals1	0.000392194	0.265407	1	0.996	0.0037505
Sec61b	0.00012228	0.265299	0.993	1	0.0015197
Birc5	0.0116808	0.265251	0.409	0.311	0.0443252
Bok	0.00552642	0.265198	0.685	0.56	0.026189
Mrfap1	7.92e-06	0.265106	0.998	0.977	0.000161087
Calr	0.000183201	0.265044	0.995	0.988	0.00211243
Grb10	7.01e-05	0.264726	0.911	0.84	0.000969005
Psmb4	3.01e-05	0.264176	0.975	0.938	0.00051635
Uqcrc1	0.000160838	0.264126	0.892	0.856	0.00190972
Nasp	0.000125432	0.263877	0.869	0.802	0.00154967
Ywhae	3.49e-06	0.263828	0.998	0.992	8.44e-05
Idi1	0.00493414	0.263269	0.303	0.105	0.0243957
Matr3	0.00013451	0.263116	0.867	0.763	0.00163979
Siva1	3.83e-05	0.262233	0.958	0.872	0.000622595
Spc24	0.000326037	0.262118	0.436	0.288	0.00324868
Larp7	3.94e-05	0.261942	0.759	0.638	0.000627162
Vcan	0.00072179	0.261598	0.628	0.506	0.0059571
Rpl35	1.46e-12	0.261502	1	1	1.45e-10
Psma4	3.84e-05	0.261299	0.978	0.903	0.000622595
Ptp4a2	0.000179736	0.260853	0.842	0.72	0.00208543
Psmd12	6.81e-05	0.260629	0.874	0.809	0.000958627
Ptch1	0.000365846	0.260502	0.522	0.327	0.00353025
Rnf187	0.000126072	0.260032	0.892	0.821	0.00154967
Anapc5	0.000242543	0.260021	0.938	0.872	0.00259961
Tmco1	6.2e-05	0.259832	0.882	0.763	0.000875782
Ccdc85b	3.86e-05	0.259712	0.488	0.319	0.000622595
Ubb	1.64e-06	0.259631	1	1	4.37e-05
Ppp1ca	4.82e-05	0.259507	0.983	0.977	0.000726187
Gpx4	5.91e-05	0.259401	0.998	0.961	0.000849934
Metap2	0.000118583	0.259337	0.966	0.93	0.00149115
Ube2m	8.95e-05	0.258819	0.938	0.856	0.00119074
Atp5e	1.51e-06	0.25877	0.993	0.996	4.08e-05
Abracl	0.000323495	0.258754	0.953	0.903	0.003239
Rps21	5.8e-13	0.258501	1	1	6.62e-11
Ccdc88a	0.000352094	0.258121	0.759	0.65	0.0034391
H2afy2	0.000121494	0.257863	0.899	0.825	0.00151582
Rps27	8.43e-14	0.257793	1	1	1.12e-11
Ccdc34	0.00195647	0.257725	0.855	0.763	0.0125481
Ndufa11	0.000100454	0.257704	0.941	0.899	0.0012846
Hspb1	0.00108128	0.257551	0.431	0.272	0.00795763
Tcf3	2.54e-05	0.257509	0.704	0.545	0.000448399
Pdia4	0.000281984	0.25748	0.81	0.661	0.00297246
Tcaf1	2.84e-05	0.257328	0.623	0.479	0.000490997
Pdlim2	0.000780005	0.257299	0.951	0.887	0.00635545
Rala	9.35e-05	0.257148	0.884	0.809	0.0012291
Ndufa5	9.98e-05	0.256996	0.963	0.883	0.0012846
Ddx5	0.000180206	0.256655	1	0.981	0.00208543
Psme1	8.1e-05	0.256175	0.803	0.669	0.00109578
Ran	0.000230389	0.255993	0.995	0.996	0.00249034
S100a6	0.00484056	0.25589	0.953	0.938	0.0241239
Fkbp10	0.000171448	0.255804	0.796	0.685	0.00201325
Gstp1	2.11e-05	0.255719	0.623	0.459	0.000380117
Hdac1	7e-05	0.255673	0.803	0.626	0.000969005
Lrrc59	0.000177984	0.255673	0.704	0.564	0.00207474
Gmps	7.23e-05	0.255524	0.756	0.58	0.000995938
Lig1	0.000832042	0.254749	0.493	0.335	0.00664385
Col14a1	0.00577138	0.254414	0.724	0.588	0.027029
Msmo1	0.00135621	0.254332	0.315	0.195	0.00945796
Gpx7	9.55e-05	0.253925	0.704	0.568	0.00124062
Hnrnpa2b1	0.000520443	0.253641	0.995	0.984	0.00466957
Psmc5	0.000140235	0.253548	0.926	0.821	0.00170308
Alyref	0.000332625	0.253301	0.837	0.739	0.00329939
Oaf	0.000399061	0.253262	0.781	0.642	0.00380478
Ssrp1	0.000302424	0.252985	0.894	0.829	0.00308608
Myl6	0.00029832	0.252816	1	1	0.00307366
Rex1bd	0.000301234	0.252423	0.857	0.735	0.00308608
Tmem176a	0.00270338	0.252245	0.759	0.642	0.0158724
Psip1	0.00206969	0.252168	0.884	0.813	0.0131163
Atox1	0.00019901	0.251891	0.892	0.829	0.00224138
Tmed2	0.000377101	0.251735	0.951	0.93	0.00362789
Hint1	1.1e-05	0.251676	0.998	0.984	0.000211842
Hsbp1	0.000216746	0.251583	0.943	0.895	0.00237899
Crip2	0.0012222	0.251409	0.544	0.405	0.00869425
Itm2a	0.0114048	0.251374	0.367	0.226	0.0439409
Tma7	0.000321215	0.251056	0.975	0.918	0.00323088
Ccnb2	0.0613576	0.250908	0.438	0.323	0.141295
Swi5	0.000278964	0.250796	0.98	0.965	0.00295036
Sparc	0.0238916	0.250594	0.998	0.984	0.0743034
Slc9a3r2	8.36e-05	0.25053	0.695	0.529	0.00112625
Psmd7	0.00087902	0.250393	0.921	0.887	0.00686453
1810058I24Rik	0.000163946	0.249602	0.966	0.926	0.00193943
Rest	0.000520466	0.249394	0.835	0.704	0.00466957
Dnajc3	0.000264514	0.249269	0.759	0.611	0.00280684
Cdk4	4.44e-05	0.249242	0.993	0.977	0.000681871
Dstn	0.00305849	0.249075	0.975	0.973	0.0174132
Selenom	0.00125978	0.248942	0.963	0.942	0.00892179
Ctxn1	0.000425285	0.24889	0.687	0.588	0.00403074
Flna	0.00173609	0.248643	0.951	0.907	0.0112705
Srp9	0.000187978	0.248635	0.953	0.911	0.00214429
Mmp14	0.00111696	0.248609	0.808	0.716	0.00813453
Wdr1	8.06e-05	0.248321	0.623	0.479	0.00109578
Psme2	0.000114051	0.248083	0.751	0.611	0.00143984
Rbm25	0.0003444	0.247972	0.97	0.914	0.0033951
Ranbp1	0.000861772	0.247907	0.963	0.93	0.00677955
Nrep	0.000525876	0.247705	0.823	0.696	0.0047049
Lef1	0.0631385	0.247705	0.202	0.089	0.143552
Snap47	3.84e-05	0.247299	0.672	0.486	0.000622595
Selenos	0.000931114	0.247299	0.81	0.774	0.00714899
Psmc4	0.000873892	0.247155	0.877	0.786	0.0068412
Sumo2	3.95e-05	0.247043	0.99	0.992	0.000627162
Nxf1	0.000454943	0.247036	0.911	0.786	0.00426125
Mrpl22	2.64e-05	0.246974	0.599	0.432	0.000463753
Arpc1b	0.0123246	0.246579	0.956	0.926	0.0457199
Rfc3	0.000187665	0.24652	0.631	0.455	0.00214429
Top2a	0.00239203	0.246424	0.382	0.249	0.0144974
Mrps15	0.000148061	0.246233	0.761	0.595	0.00178455
Pfn1	8.5e-05	0.246188	0.998	0.996	0.001141
Auts2	0.00348353	0.246097	0.805	0.732	0.0188903
Nucks1	0.00410245	0.246039	0.958	0.914	0.0214455
Ptms	0.0012513	0.245918	0.998	0.984	0.00888148
Anapc13	0.000360512	0.24544	0.877	0.77	0.00349993
Ube2v2	0.000158215	0.244887	0.818	0.681	0.00189266
Zfp36l1	0.00270006	0.244685	0.938	0.872	0.0158724
Sh3bgrl3	0.000948097	0.244533	0.933	0.829	0.00721005
Phb	0.000141033	0.24447	0.751	0.595	0.00170629
Kdelr3	0.000419812	0.244389	0.729	0.58	0.00399071
Romo1	0.000285764	0.244086	0.963	0.934	0.00299256
Tceal9	0.000555052	0.243943	0.99	0.988	0.00489734
Ssbp3	0.000215032	0.243706	0.8	0.642	0.00237651
Rpn2	0.000674794	0.243608	0.872	0.774	0.00567182
Park7	0.000260588	0.243385	0.985	0.977	0.0027744
Pak2	9.51e-05	0.243369	0.672	0.518	0.00124062
Sap18	0.000296658	0.243293	0.813	0.677	0.00306643
Canx	0.00127837	0.243167	0.897	0.77	0.00901347
Acp1	0.000391709	0.243062	0.914	0.813	0.0037505
Prdx4	0.00250613	0.243009	0.929	0.899	0.015018
Immt	0.00029259	0.24278	0.85	0.72	0.0030342
Postn	0.347906	0.242743	0.153	0.086	0.420436
2010107E04Rik	0.000289857	0.24267	0.963	0.914	0.0030223
mt-Co3	8.57e-06	0.242606	0.995	1	0.000173305
Cyb5r3	0.000210393	0.242578	0.719	0.568	0.00233332
Prdx2	0.000108934	0.242225	0.993	0.988	0.0013862
Ssu72	0.000255284	0.24197	0.805	0.677	0.00272702
Mrpl27	7.41e-05	0.241833	0.613	0.49	0.00101541
Rbpms	0.00101527	0.241486	0.909	0.837	0.00759432
Psmd2	0.000711338	0.241025	0.901	0.794	0.00590134
Mtpn	0.000203982	0.240949	0.697	0.556	0.00227803
Dynlrb1	0.000706233	0.240914	0.894	0.848	0.00587424
Bmp1	5.28e-05	0.240845	0.562	0.409	0.000770451
Edf1	0.000585273	0.240662	0.963	0.922	0.00513561
Top1	0.00148971	0.240552	0.993	0.988	0.0101272
Pja1	0.00221594	0.240447	0.808	0.72	0.0137165
Tmbim6	0.0013265	0.239932	0.924	0.844	0.00931174
Nudc	0.000443747	0.239782	0.916	0.86	0.00418091
Nsrp1	0.000354113	0.239769	0.746	0.576	0.00344829
Cox4i1	7.5e-06	0.239715	1	0.996	0.0001556
Pcbp1	0.000827436	0.23937	0.968	0.946	0.00662364
Psmc2	0.000609369	0.239351	0.897	0.778	0.00528893
H19	0.170744	0.239301	0.862	0.852	0.273774
Pdia3	0.00399146	0.239243	0.961	0.961	0.0210375
Kdm5b	0.00172655	0.239143	0.766	0.677	0.0112559
Coq7	0.000126147	0.23901	0.727	0.549	0.00154967
Cmpk1	0.000192579	0.238914	0.729	0.572	0.00218119
Fkbp3	0.00146817	0.238649	0.946	0.926	0.010063
Atad2	0.00443343	0.238562	0.377	0.257	0.0226929
Cnbp	0.00248478	0.238532	0.983	0.957	0.0149461
G3bp1	0.00234821	0.238463	0.933	0.879	0.0142861
Hnrnpr	0.00111363	0.238442	0.978	0.942	0.00813453
Arl3	0.000486918	0.238211	0.86	0.747	0.00449484
Eif4g3	0.00030232	0.23809	0.618	0.482	0.00308608
Rfc2	0.000944823	0.238085	0.571	0.44	0.0072023
Pomp	0.000625727	0.237678	0.968	0.926	0.00540154
Hdlbp	0.00114681	0.237644	0.911	0.833	0.0082498
Copz2	0.000595286	0.237461	0.828	0.72	0.00520916
Usp50	4.05e-05	0.237327	0.475	0.253	0.000634723
Sec61a1	0.000113609	0.237107	0.606	0.397	0.00143984
mt-Nd1	0.000199296	0.23681	0.993	0.992	0.00224138
Akap12	0.0330124	0.236617	0.938	0.903	0.0929987
Serf2	9.15e-05	0.236449	0.998	1	0.00120927
Erp29	0.000903807	0.236394	0.953	0.887	0.00698973
6330403K07Rik	0.00300311	0.23587	0.584	0.444	0.0172899
Cdk1	0.000916405	0.23587	0.429	0.288	0.00707004
Vdac3	0.000660622	0.235371	0.958	0.926	0.00561177
Tmem256	0.000717073	0.235368	0.961	0.903	0.0059335
Nedd8	0.000314646	0.235237	0.995	0.984	0.00320058
Snrpa1	0.000881308	0.235084	0.82	0.689	0.00686561
Jpt1	0.001509	0.235066	0.815	0.661	0.0102113
Rdx	0.000868303	0.235024	0.958	0.914	0.00681415
Rcn1	0.00152314	0.234991	0.978	0.93	0.0102419
Erg28	0.000290497	0.234843	0.709	0.541	0.0030223
Zyx	0.00017421	0.234567	0.527	0.35	0.00203819
Wnt5a	0.000230789	0.234529	0.475	0.315	0.00249034
Stub1	0.000818568	0.234327	0.946	0.934	0.00656911
Myl12a	0.00329859	0.23399	0.99	0.981	0.0183285
Bub3	0.000229048	0.23381	0.702	0.514	0.00248837
Rab1a	0.000223774	0.233767	0.722	0.521	0.00243937
Dctn4	0.000285158	0.233731	0.692	0.51	0.00299256
Cdc37	0.00116036	0.233643	0.975	0.918	0.00830981
Rac1	0.000852246	0.23346	0.914	0.856	0.00675452
Psmb2	0.000854516	0.233305	0.956	0.899	0.00675497
Hnrnpk	0.000662408	0.233001	0.998	1	0.00561202
Vdac1	0.00212371	0.232763	0.961	0.914	0.0133334
Fam111a	0.00662734	0.23276	0.315	0.167	0.0296467
Igfbp7	0.10628	0.232541	0.963	0.911	0.200625
Hmgb3	0.00244858	0.23242	0.892	0.802	0.0147562
Sra1	0.000657926	0.232311	0.781	0.665	0.00560378
Emp3	0.00209537	0.232104	0.993	0.961	0.0132013
Tssc4	5.67e-05	0.232017	0.594	0.358	0.000823383
Lsp1	0.0586735	0.231964	0.99	0.992	0.138054
Eif5a	0.00140595	0.231929	1	0.984	0.00974098
Gpx1	0.00524819	0.231925	0.921	0.837	0.0253213
Smc1a	0.00341146	0.231921	0.894	0.848	0.0186899
Slc39a7	0.000476551	0.231813	0.714	0.556	0.0044119
Ewsr1	0.00187623	0.231811	0.926	0.813	0.0121309
Psmd6	0.00104339	0.23169	0.914	0.879	0.00774832
Thrap3	0.00409871	0.231587	0.818	0.712	0.0214455
Ube2s	0.0295229	0.231436	0.938	0.895	0.0857237
Capns1	0.0017071	0.231281	0.961	0.922	0.0112422
6030408B16Rik	0.00321189	0.230994	0.692	0.498	0.0180931
Dcakd	0.000365133	0.230776	0.712	0.529	0.00353025
Ddx6	0.000813553	0.230734	0.695	0.514	0.00656184
Eif1ax	0.00144105	0.230732	0.862	0.732	0.00994106
Eloc	0.00115215	0.230577	0.857	0.759	0.0082696
Nme1	0.00522628	0.230479	0.978	0.961	0.0252538
Pold2	6.02e-05	0.230435	0.525	0.327	0.00085843
Nudt21	0.00112523	0.230334	0.85	0.732	0.00814959
Ndufs8	0.00111805	0.230139	0.862	0.805	0.00813453
Ntan1	0.000788652	0.230125	0.825	0.735	0.00640955
Uhrf1	0.00171549	0.229754	0.34	0.202	0.0112559
Atp5f1	0.00050069	0.229563	0.99	1	0.00456915
Bcap31	0.00101171	0.229181	0.852	0.77	0.00759432
Ntrk1	0.0177963	0.229113	0.271	0.125	0.0593954
Reep5	0.00114084	0.22909	0.914	0.844	0.00822539
Smc2	0.000980866	0.228869	0.466	0.354	0.00740635
Pdcd4	0.00749532	0.228788	0.901	0.872	0.0327946
Cnot6	0.000184778	0.228769	0.608	0.436	0.00212296
Ctnnb1	0.00303837	0.228657	0.953	0.895	0.0174089
Clk1	0.00412671	0.228562	0.788	0.735	0.0215371
Fbxo22	0.000155971	0.22849	0.584	0.436	0.00187283
Prpf4b	0.00396481	0.228482	0.931	0.833	0.0209662
Tpr	0.00595728	0.228446	0.938	0.879	0.0276162
Spcs2	0.00208408	0.228173	0.975	0.942	0.0131813
Cdk9	0.000530654	0.22792	0.628	0.479	0.00471793
Sema6a	0.000351264	0.227773	0.488	0.331	0.0034391
Nop56	0.0052145	0.227417	0.739	0.677	0.025235
Hoxd10	0.000201984	0.227191	0.569	0.381	0.00226364
Gcsh	0.000320272	0.227098	0.672	0.529	0.00323088
Lsm8	0.000842089	0.226997	0.788	0.646	0.00669063
Hnrnpf	0.00212482	0.226823	0.993	0.988	0.0133334
Myh10	0.0623269	0.226756	0.887	0.813	0.142798
Zranb2	0.00322577	0.226738	0.901	0.798	0.0181099
Sptssa	0.00332773	0.226738	0.86	0.759	0.0184208
Nrbp1	0.000952255	0.226498	0.764	0.603	0.00722231
Ppp3ca	0.00495912	0.226326	0.729	0.642	0.0244435
Idh1	0.000856532	0.226239	0.384	0.187	0.00675497
Uqcr10	0.00172562	0.226225	0.97	0.911	0.0112559
Mxd4	0.00391513	0.226185	0.906	0.798	0.0207575
Dusp11	0.000502431	0.225953	0.643	0.521	0.00457198
Ilf2	0.00232316	0.225776	0.85	0.751	0.0141877
Itm2b	0.00684003	0.225728	0.993	0.992	0.0303431
Phf20l1	0.000533241	0.225706	0.603	0.463	0.00471793
D8Ertd738e	0.00241694	0.225603	0.948	0.899	0.014593
Ndufa10	0.00223196	0.225543	0.946	0.868	0.0137623
Ift20	0.00356209	0.225218	0.874	0.782	0.019186
Hnrnpab	0.00346942	0.225125	0.943	0.879	0.0188782
Kpnb1	0.00222563	0.225083	0.626	0.49	0.0137498
Ruvbl1	0.00149023	0.224992	0.855	0.732	0.0101272
Atp5b	0.00250481	0.224599	0.998	0.992	0.015018
Ppp1r14b	0.0112636	0.224417	0.978	0.942	0.0435542
Cox6c	0.000759693	0.224276	0.995	0.992	0.00622169
Mapre1	0.00266065	0.224053	0.847	0.743	0.0157372
Sf3b6	0.00234392	0.224051	0.911	0.79	0.0142861
Lims1	0.00172201	0.224046	0.749	0.646	0.0112559
Cops4	0.00172679	0.223961	0.882	0.825	0.0112559
Pdrg1	0.000130477	0.223926	0.557	0.346	0.00159672
Atp5j2	0.00173391	0.2236	0.99	0.981	0.0112705
Arf4	0.00381171	0.22352	0.99	0.953	0.0203249
Gadd45gip1	0.000681999	0.223448	0.69	0.556	0.00570769
Dhx15	0.00134161	0.223436	0.744	0.607	0.00937658
Arf1	0.00298129	0.223174	0.988	0.961	0.0172193
Esf1	0.00102541	0.223168	0.719	0.56	0.00765221
Ndufb8	0.00413613	0.223068	0.985	0.949	0.0215511
Rsrc2	0.00276373	0.222883	0.909	0.879	0.0161673
S100a11	0.0184782	0.222788	0.995	0.984	0.0610335
Cdc123	0.000810863	0.222732	0.707	0.588	0.0065567
Baz1b	0.00120539	0.2226	0.707	0.576	0.00859378
Lap3	0.00191407	0.222578	0.751	0.634	0.0123257
Mrpl14	0.00168858	0.222559	0.81	0.7	0.0111468
Luzp1	0.00158087	0.222411	0.764	0.634	0.0105855
Mbnl2	0.00268035	0.222402	0.776	0.72	0.0157953
Cd81	0.0116153	0.222358	0.995	0.988	0.0442182
Nexn	0.0142145	0.222264	0.468	0.319	0.0506711
Nt5dc2	0.00505356	0.222231	0.899	0.805	0.0247039
Rpl37	1.2e-07	0.222062	0.998	1	4.44e-06
Pnn	0.00698665	0.222062	0.906	0.844	0.0309077
Sema5a	0.00325099	0.221776	0.456	0.354	0.0181533
Fscn1	0.00406042	0.22173	0.828	0.712	0.0212955
Phc2	0.000652306	0.221652	0.613	0.42	0.00557077
Ube2i	0.0033246	0.221469	0.958	0.965	0.0184208
Actr3	0.00713091	0.221391	0.894	0.809	0.0314588
Atp5g1	0.00707664	0.221279	0.995	0.988	0.0312625
Hddc2	0.000474591	0.2212	0.571	0.436	0.00440652
Nars	0.00158825	0.221128	0.803	0.7	0.0106127
Mesd	0.000738719	0.220864	0.653	0.541	0.00606547
Set	0.0101215	0.220744	0.995	0.992	0.0408183
Cdc5l	0.00157197	0.220603	0.7	0.591	0.0105481
Usp1	0.0045287	0.220567	0.498	0.416	0.0229963
Gabarap	0.00458488	0.220466	0.993	0.988	0.023171
Ntm	0.0156328	0.220431	0.367	0.23	0.0542023
Psmd8	0.00399885	0.220185	0.946	0.895	0.0210417
Hmgn1	0.0030859	0.220159	1	0.992	0.0175068
Rpa2	0.00104556	0.220122	0.406	0.268	0.00774832
Arpc2	0.00773921	0.220034	0.98	0.946	0.0336004
Dynll2	0.000921973	0.219965	0.717	0.564	0.00709586
Dnajc9	0.00542655	0.219902	0.618	0.518	0.0259467
1500009L16Rik	0.00106207	0.219722	0.596	0.479	0.00785241
Cnn3	0.00520703	0.219703	0.919	0.852	0.025235
Kdelr2	0.00391884	0.219517	0.867	0.755	0.0207575
Nedd4	0.00600454	0.219244	0.998	0.996	0.0277547
Ahsa1	0.00113832	0.219228	0.729	0.634	0.00822539
Fdft1	0.00861585	0.219175	0.31	0.132	0.0364008
Snrpd1	0.00260232	0.21917	0.968	0.926	0.0154782
Ywhab	0.00607108	0.219143	0.948	0.93	0.0279008
Gtf3c6	0.00228809	0.219126	0.727	0.615	0.0140003
Ppa1	0.00323945	0.219126	0.7	0.615	0.0181523
Col5a2	0.00580473	0.218845	0.803	0.716	0.0271414
Cyc1	0.00424831	0.218731	0.906	0.813	0.0219902
Hat1	0.00069283	0.218678	0.599	0.444	0.0057778
Nfat5	0.0359722	0.218579	0.596	0.588	0.098154
Brd4	0.00163624	0.218549	0.69	0.556	0.0108878
Timp2	0.0046088	0.218478	0.788	0.689	0.0232552
Lsm2	0.00196374	0.218446	0.751	0.658	0.0125695
Ndufb9	0.00263012	0.218385	0.983	0.973	0.0155855
Snx3	0.0063582	0.218377	0.919	0.844	0.028765
Col4a1	0.110961	0.218316	0.938	0.86	0.207014
Csrp2	0.00759655	0.218215	0.889	0.782	0.0331015
Tmem258	0.00456577	0.218171	0.951	0.938	0.0231476
Dbnl	0.00072474	0.218012	0.64	0.49	0.00596603
Psmd3	0.00360074	0.217998	0.81	0.708	0.0193615
Fstl1	0.0104815	0.217995	0.966	0.953	0.041536
Ssb	0.00725313	0.217981	0.968	0.946	0.0319538
Smim7	0.00416119	0.217916	0.764	0.658	0.0216111
Cops6	0.00554368	0.217773	0.919	0.911	0.0262319
Sparcl1	0.0450689	0.217688	0.638	0.514	0.114428
Aco2	0.00165533	0.217621	0.8	0.63	0.0109919
Cdc42	0.0103784	0.217619	0.995	0.996	0.041384
mt-Atp6	0.000609004	0.217372	1	1	0.00528893
1810022K09Rik	0.00355586	0.217351	0.818	0.751	0.0191848
Rab13	0.00514895	0.217241	0.793	0.693	0.0250697
Mki67	0.0099076	0.217124	0.345	0.23	0.0403119
Ptbp1	0.00438514	0.217061	0.84	0.7	0.0225229
Rpl36	7.83e-06	0.216909	1	1	0.000160258
Xpnpep1	0.00101495	0.216902	0.702	0.572	0.00759432
Cnpy2	0.010956	0.216735	0.958	0.946	0.0428044
Srm	0.0169149	0.216712	0.633	0.549	0.0573525
Hnrnpdl	0.0131302	0.216433	0.951	0.883	0.0478744
mt-Nd4l	0.0128887	0.216394	0.978	0.965	0.0472094
Yipf5	0.00147272	0.216372	0.682	0.568	0.0100725
Map1lc3a	0.00998983	0.216318	0.916	0.864	0.0405948
Tceal8	0.004874	0.216295	0.899	0.79	0.0242441
Pa2g4	0.00577	0.216234	0.835	0.778	0.027029
Pgp	0.00240531	0.216028	0.648	0.545	0.0145503
Uqcrq	0.0091595	0.215985	0.943	0.887	0.038093
Clic1	0.00969517	0.215908	0.988	0.969	0.0397005
Rpl38	1.25e-05	0.215873	1	1	0.000237031
Arcn1	0.00201385	0.215838	0.687	0.529	0.0127878
Denr	0.0034343	0.215824	0.924	0.821	0.0187828
Cwc15	0.00324772	0.215726	0.872	0.77	0.0181533
Ogfr	0.000818442	0.215576	0.635	0.502	0.00656911
Snrnp70	0.00532183	0.21553	0.953	0.911	0.0255573
Ndufa2	0.00445791	0.215506	0.978	0.973	0.0227453
Psmb5	0.00658787	0.215436	0.953	0.946	0.0295944
Taf1d	0.0105036	0.215392	0.805	0.72	0.0415719
Xbp1	0.0117438	0.215336	0.768	0.669	0.0444955
Morf4l2	0.0104781	0.215295	0.921	0.879	0.041536
Gpc3	0.0420201	0.215182	0.998	0.992	0.10992
Sf3b4	0.000531206	0.215176	0.581	0.451	0.00471793
Syncrip	0.00650268	0.215118	0.842	0.767	0.0293355
Mdh2	0.00438612	0.215079	0.938	0.911	0.0225229
Gdi2	0.0077426	0.214894	0.97	0.922	0.0336004
Cfap36	0.00142022	0.214723	0.616	0.479	0.00981859
Hnrnpc	0.0198288	0.214703	0.97	0.953	0.0644511
Lsm6	0.00307498	0.214663	0.842	0.728	0.017476
Zfp207	0.00275895	0.214661	0.746	0.646	0.0161673
Eif3a	0.0166964	0.214517	0.963	0.961	0.0567926
Hic1	0.0172957	0.214463	0.813	0.689	0.0582728
Adh5	0.00618329	0.214078	0.933	0.895	0.0282538
H3f3a	3.83e-05	0.214076	1	1	0.000622595
Ppib	0.00305842	0.214064	0.995	1	0.0174132
Akt1	0.00440824	0.214028	0.835	0.724	0.0226002
Hnrnph1	0.00602948	0.214004	0.877	0.833	0.0278297
Ppp2ca	0.00583786	0.213958	0.961	0.914	0.0271414
Cyb5a	0.00570716	0.213842	0.926	0.895	0.0268069
Ppp1r11	0.00257227	0.213764	0.734	0.626	0.015328
Col23a1	0.111287	0.213742	0.219	0.078	0.207502
Cdk5rap3	0.000474253	0.213719	0.542	0.366	0.00440652
Tomm40	0.00340637	0.213657	0.773	0.665	0.0186899
Actn1	0.00966721	0.213624	0.897	0.813	0.0396878
Lamtor1	0.0046169	0.213594	0.874	0.837	0.0232593
Fkbp8	0.00520116	0.213397	0.899	0.805	0.025235
Fam133b	0.0038885	0.213173	0.776	0.634	0.0206653
Wdr6	0.000494731	0.212943	0.525	0.307	0.00454072
Rnf7	0.00560292	0.212852	0.924	0.868	0.0264339
Rtf1	0.0100785	0.212823	0.897	0.829	0.0407993
Mdh1	0.00898215	0.212822	0.978	0.93	0.0375092
Nipbl	0.00495898	0.212603	0.776	0.654	0.0244435
Pcbp4	0.00044144	0.212583	0.554	0.381	0.00417147
Smo	0.00291981	0.21245	0.759	0.634	0.0169561
Glrx5	0.00347194	0.212266	0.81	0.716	0.0188782
Ptov1	0.00675228	0.212185	0.983	0.969	0.0301212
Nsdhl	0.0248112	0.2121	0.288	0.125	0.0766943
Taf12	0.000489656	0.212043	0.478	0.304	0.00450709
Eif2s2	0.0125056	0.211981	0.998	0.957	0.0462303
Ncbp2	0.0032996	0.211865	0.746	0.572	0.0183285
Timm8b	0.00557516	0.211852	0.778	0.681	0.0263418
Atp5j	0.00532911	0.211656	0.998	0.977	0.0255573
Eif4ebp1	0.0047329	0.211647	0.761	0.669	0.0236942
Aprt	0.0810893	0.211624	0.931	0.895	0.166805
Rbm42	0.00133101	0.211613	0.665	0.525	0.00932292
Cul1	0.00305338	0.211599	0.759	0.619	0.0174132
Golgb1	0.00583661	0.211502	0.719	0.626	0.0271414
Sar1a	0.0054447	0.211079	0.818	0.743	0.0259699
Aldh1a2	0.187879	0.210985	0.663	0.568	0.289477
Mdfi	0.000446598	0.210973	0.505	0.335	0.00419539
Aifm1	0.000801604	0.210913	0.628	0.459	0.00649828
Naxe	0.00444886	0.210848	0.805	0.708	0.0227355
Arih1	0.000532619	0.210834	0.495	0.335	0.00471793
Ftl1	0.000629833	0.210546	1	1	0.00542234
Marcks	0.00831995	0.210377	0.995	0.996	0.0353377
Capzb	0.0102435	0.2102	0.938	0.887	0.0410821
Eny2	0.00874896	0.210185	0.914	0.879	0.0367203
Ube2j2	0.000941641	0.210138	0.638	0.479	0.00719522
Adamts1	0.0162232	0.210118	0.458	0.381	0.0555975
Mat2a	0.012096	0.210062	0.793	0.716	0.0453507
Txndc5	0.00490036	0.209837	0.862	0.755	0.024304
Tecr	0.00745641	0.209514	0.909	0.844	0.032714
1700020I14Rik	0.00146456	0.209508	0.603	0.467	0.0100598
1110065P20Rik	0.000898999	0.209266	0.591	0.455	0.00697643
Fzd2	0.0150039	0.209245	0.786	0.712	0.0527198
Gpr180	0.000497277	0.209202	0.515	0.323	0.00455102
Rhoa	0.0160089	0.209162	0.983	0.946	0.0550996
Ilk	0.0101789	0.209136	0.889	0.856	0.0408949
Smarca5	0.00866665	0.209062	0.897	0.798	0.0364707
Supt20	0.000602898	0.208719	0.564	0.409	0.00526135
Prdx1	0.0149381	0.208686	0.998	0.988	0.0525464
2022-03-05	0.00503044	0.208417	0.714	0.623	0.0247039
Rrm1	0.000682635	0.208396	0.468	0.284	0.00570769
Mmp2	0.00616516	0.208172	0.781	0.669	0.0282113
Ktn1	0.0109866	0.208163	0.82	0.755	0.0428464
Nfix	0.0200913	0.208091	0.911	0.794	0.0650169
Khdrbs1	0.0115601	0.208074	0.877	0.856	0.0440987
Tanc1	0.00213944	0.207985	0.515	0.381	0.0133988
Rad23b	0.00165948	0.207763	0.64	0.502	0.0109967
2410004B18Rik	0.000636753	0.20754	0.485	0.323	0.00545252
Gnb1	0.0176792	0.20754	0.926	0.883	0.0591282
Rcn2	0.00610278	0.207522	0.84	0.755	0.0280062
Trir	0.00824059	0.207499	0.936	0.84	0.0350939
Yaf2	0.00295942	0.207479	0.736	0.56	0.0171239
Eif3l	0.00747277	0.207426	0.862	0.809	0.0327408
Dad1	0.0145501	0.207382	0.99	0.965	0.0514651
Tgfb1i1	0.0162677	0.207102	0.83	0.72	0.0556903
Copz1	0.00146346	0.207075	0.675	0.51	0.0100598
Fbln5	0.0733948	0.207007	0.825	0.755	0.156421
Chd4	0.030719	0.206968	0.882	0.844	0.0882342
Rpl37a	5.44e-06	0.206798	1	1	0.000119788
Eif4e	0.00256599	0.206795	0.741	0.611	0.0153192
Atp5h	0.00545868	0.206542	0.993	0.992	0.0259836
Tcerg1	0.00218069	0.206489	0.618	0.467	0.0136037
Cdc26	0.00680851	0.206467	0.852	0.778	0.0302875
Psmc6	0.00976734	0.206465	0.926	0.872	0.0399448
Sox12	0.00192701	0.206279	0.667	0.545	0.012384
Cnih1	0.00262008	0.20614	0.7	0.572	0.0155549
Mpc2	0.00814373	0.206096	0.914	0.817	0.0347742
Sec31a	0.00221487	0.206081	0.685	0.549	0.0137165
Cdo1	0.00228212	0.206017	0.463	0.319	0.0139906
Polr2f	0.00820113	0.205523	0.897	0.767	0.0349725
Crtap	0.00449196	0.205517	0.658	0.549	0.0228461
Atp5g3	0.0115331	0.205233	0.966	0.938	0.0440629
Mfap5	0.211118	0.205203	0.2	0.109	0.311872
Fam96a	0.00302167	0.205129	0.764	0.603	0.0173583
Wnk1	0.00365594	0.205129	0.709	0.56	0.0196253
Traf4	0.00151373	0.205025	0.606	0.471	0.0102217
Prelid3b	0.00116491	0.205019	0.537	0.393	0.00832376
Ap3s1	0.00505835	0.204945	0.697	0.619	0.0247039
Elob	0.0101458	0.204565	0.993	0.981	0.0408648
Rbbp4	0.0112287	0.204559	0.921	0.829	0.0435542
Topors	0.00304138	0.204477	0.626	0.471	0.0174089
Cdc16	0.00604597	0.204463	0.759	0.658	0.0278655
Eif4g2	0.0159231	0.204341	0.975	0.965	0.0549227
Psma7	0.0175886	0.204328	0.988	0.961	0.0589509
Slc38a2	0.0456848	0.204183	0.921	0.899	0.115441
Plagl1	0.133579	0.204177	0.663	0.626	0.233015
Rhoc	0.0137544	0.204078	0.86	0.798	0.0494725
Morf4l1	0.0153903	0.203994	0.998	0.988	0.0536646
Eef1g	0.00510972	0.203987	1	0.996	0.0249167
Sptan1	0.00349716	0.203977	0.606	0.498	0.0189321
Snrnp40	0.00387771	0.203882	0.766	0.607	0.0206423
Pfdn2	0.00810402	0.20388	0.855	0.735	0.0346509
Fis1	0.012619	0.203871	0.953	0.914	0.0464343
Zmiz1	0.000954231	0.203609	0.515	0.362	0.00722231
Ubn1	0.00627242	0.203567	0.759	0.658	0.0285793
Emcn	0.0171219	0.203547	0.475	0.335	0.0578702
Cped1	0.00624951	0.203467	0.382	0.261	0.0285156
Tmod3	0.0195586	0.203353	0.857	0.716	0.0637451
Srrm2	0.051776	0.20335	0.983	0.961	0.126722
Ctnnbip1	0.00320909	0.203347	0.709	0.564	0.0180931
Cdk12	0.00267642	0.202848	0.591	0.451	0.0157953
Ndufb6	0.0096594	0.202837	0.889	0.809	0.0396878
Smim8	0.00139041	0.202784	0.431	0.261	0.00965428
Haus7	0.000761821	0.20275	0.466	0.296	0.00622316
Pbrm1	0.0168619	0.202718	0.746	0.669	0.0572337
Eif5b	0.0251404	0.202677	0.966	0.938	0.0771359
Smchd1	0.00315119	0.202438	0.618	0.447	0.0178455
Mlf2	0.0139296	0.202377	0.884	0.825	0.0499901
Psmd13	0.0101721	0.202228	0.823	0.77	0.0408949
Kif5b	0.0151737	0.202093	0.904	0.833	0.0531736
Rbfox2	0.0098327	0.202086	0.746	0.673	0.0401039
Tmem97	0.00101152	0.202068	0.458	0.249	0.00759432
Gstm5	0.0180811	0.201923	0.84	0.786	0.0600946
Ostc	0.0293635	0.201894	0.978	0.957	0.0854508
Cox7b	0.0136329	0.201857	0.983	0.938	0.0490908
Ctbp2	0.00678476	0.201776	0.724	0.58	0.0302239
Snrpb	0.0211704	0.201627	0.985	0.957	0.0678219
Atp5g2	0.011685	0.201512	0.998	0.996	0.0443252
Aurkaip1	0.0106452	0.201502	0.887	0.802	0.0419246
Anp32b	0.0313729	0.201424	0.988	0.988	0.0897092
Cldn11	0.0552532	0.201344	0.431	0.358	0.133064
Limd2	0.0104529	0.201308	0.751	0.65	0.041536
Pttg1	0.00827532	0.20124	0.5	0.444	0.0351949
2700081O15Rik	0.00107018	0.201217	0.485	0.342	0.00789415
Prelid1	0.0248764	0.201185	0.951	0.911	0.0766943
Fubp1	0.0359675	0.201152	0.943	0.914	0.098154
Glo1	0.0114357	0.201097	0.855	0.774	0.0439538
Atxn10	0.0172875	0.201031	0.946	0.883	0.0582728
Zfp326	0.00833734	0.200679	0.695	0.634	0.0353645
Slc25a3	0.0142502	0.200605	0.993	0.992	0.0506899
Rbx1	0.0113606	0.200536	0.993	0.946	0.0438236
Smc3	0.0184768	0.200483	0.911	0.833	0.0610335
Tspan3	0.0293754	0.200287	0.941	0.864	0.0854508
Mrpl58	0.00877997	0.20021	0.85	0.755	0.0368021
Pin1	0.00548762	0.200024	0.798	0.654	0.0260438
Ugdh	0.00110625	0.199953	0.581	0.409	0.00810402
Adrm1	0.00498027	0.199938	0.727	0.591	0.02451
Htatsf1	0.0035451	0.199811	0.702	0.525	0.0191591
Tmem165	0.00802787	0.199807	0.8	0.732	0.0344175
Idh2	0.0143092	0.199802	0.98	0.953	0.0508383
Armc1	0.00209551	0.199757	0.658	0.482	0.0132013
Mrps25	0.0021482	0.199588	0.628	0.463	0.0134273
Dtymk	0.0115303	0.19939	0.825	0.712	0.0440629
Cmtm3	0.00694785	0.199292	0.756	0.626	0.0307787
Clns1a	0.00770386	0.199243	0.768	0.677	0.0335233
Mettl16	0.00148144	0.199121	0.544	0.389	0.0101105
Tomm7	0.0210241	0.199012	0.97	0.914	0.0674885
Fkbp2	0.0121653	0.198952	0.722	0.603	0.0454519
Psma3	0.0363099	0.198907	0.983	0.988	0.0988694
Arl2	0.00226633	0.198895	0.611	0.467	0.0139205
Drg1	0.00322622	0.198219	0.611	0.471	0.0181099
Prdx6	0.0268361	0.19813	0.924	0.879	0.080939
Phax	0.00655587	0.198095	0.783	0.658	0.0294922
Txn2	0.0078186	0.198095	0.739	0.63	0.0337996
Erp44	0.0018892	0.197991	0.599	0.463	0.0121901
Lman2	0.00431882	0.197971	0.692	0.556	0.0222848
Bex3	0.0291582	0.197847	0.99	0.981	0.0854508
Kdelr1	0.0154822	0.197833	0.914	0.84	0.0538672
Rpn1	0.0287931	0.19782	0.823	0.72	0.084917
Mrpl21	0.011007	0.197778	0.796	0.72	0.0428738
Atp5o.1	0.028314	0.197677	0.998	0.984	0.0839693
Hnrnpu	0.0485265	0.197498	0.988	0.953	0.120994
Srsf7	0.0462314	0.197492	0.921	0.852	0.116545
4930453N24Rik	0.00138379	0.197354	0.596	0.42	0.00962928
Sppl3	0.00126438	0.197298	0.515	0.335	0.00893459
Hdac3	0.00236741	0.197291	0.628	0.471	0.0143755
Mrps7	0.00800655	0.197241	0.754	0.619	0.0344175
Tcp1	0.0210842	0.197235	0.968	0.918	0.0676134
Suclg1	0.0140993	0.197173	0.884	0.817	0.0504231
Naa20	0.00370061	0.197084	0.658	0.521	0.0198318
Prdx5	0.0473861	0.197084	0.968	0.934	0.118707
Id4	0.0678545	0.196894	0.271	0.179	0.149612
Smn1	0.00221138	0.196745	0.581	0.447	0.0137165
Ddx39b	0.0315619	0.196713	0.973	0.942	0.0901145
Nae1	0.0018142	0.196649	0.559	0.409	0.0117537
Ankrd11	0.0349922	0.196649	0.901	0.833	0.0964324
Glt8d1	0.0014998	0.196547	0.549	0.381	0.0101706
Slc6a6	0.00336809	0.196436	0.478	0.3	0.0185798
Cks2	0.124936	0.196384	0.49	0.35	0.224184
Ubxn4	0.0100956	0.196374	0.776	0.658	0.040809
Unc5c	0.00221273	0.196339	0.527	0.358	0.0137165
Pabpn1	0.0058933	0.196295	0.616	0.471	0.0273593
Hnrnph3	0.015947	0.196244	0.798	0.704	0.0549459
Ddah2	0.055602	0.196184	0.953	0.922	0.133128
Mtif2	0.00163387	0.19617	0.443	0.265	0.0108878
Tpx2	0.102099	0.19613	0.251	0.125	0.195155
Mpg	0.00468759	0.195628	0.574	0.471	0.0235042
Rbbp7	0.0337235	0.195461	0.901	0.875	0.0941546
Ndufs3	0.0222128	0.195438	0.847	0.767	0.0705247
Mcm6	0.0964546	0.195206	0.53	0.518	0.186867
Olfml3	0.113027	0.195116	0.865	0.802	0.21001
Nisch	0.0275308	0.1951	0.877	0.837	0.0824891
Calm2	0.0779851	0.195091	0.988	0.984	0.16248
Tcf12	0.0216895	0.194896	0.717	0.634	0.0690691
Ldb2	0.0681865	0.194869	0.8	0.685	0.149612
Uqcr11	0.0230143	0.194774	0.973	0.949	0.0724927
Zfand5	0.0127344	0.194743	0.739	0.615	0.0467072
Elof1	0.0123893	0.194644	0.842	0.739	0.0458533
Rab11b	0.012191	0.194561	0.741	0.65	0.0454883
Ier3ip1	0.0117934	0.194509	0.796	0.732	0.0445426
Pfdn1	0.0246312	0.194433	0.909	0.86	0.0762325
Ndufab1	0.0261252	0.194425	0.943	0.891	0.0791789
Minos1	0.0236419	0.194276	0.933	0.914	0.0740317
Mcrip1	0.0364113	0.194224	0.892	0.825	0.099061
Maea	0.00198229	0.194197	0.547	0.405	0.0126629
Krtcap2	0.0278497	0.194197	0.963	0.942	0.0830092
U2af1	0.0270281	0.194096	0.963	0.875	0.0812113
Pdap1	0.0348729	0.19391	0.99	0.965	0.0962248
Purb	0.0605682	0.193893	0.941	0.907	0.140257
Rps29	7.39e-06	0.193823	1	1	0.000154186
Lsm12	0.0192102	0.193626	0.872	0.767	0.0629306
Fam220a	0.00255818	0.193529	0.567	0.412	0.0153012
Slc3a2	0.0131829	0.193475	0.702	0.556	0.0479596
Tfg	0.00419188	0.193408	0.613	0.486	0.0217352
Nudcd2	0.0120468	0.193387	0.744	0.669	0.0452677
Rsrp1	0.0358973	0.193365	0.874	0.833	0.098154
Angpt1	0.0048807	0.19331	0.365	0.191	0.0242441
Kif26b	0.00918836	0.19331	0.377	0.257	0.0381633
P3h3	0.0104631	0.193233	0.754	0.638	0.041536
Cdca7	0.0173903	0.192963	0.65	0.494	0.0584681
Xrn2	0.0122788	0.192807	0.796	0.708	0.0456952
Slc25a5	0.0748644	0.192678	0.926	0.868	0.158392
Gm7324	0.286711	0.192641	0.202	0.012	0.375771
Ergic2	0.0148792	0.192542	0.754	0.665	0.0523973
Ttc3	0.0425531	0.192337	0.958	0.934	0.110951
Dctn2	0.0276764	0.192258	0.894	0.84	0.0827283
Traf7	0.00199719	0.192232	0.49	0.319	0.0127072
Aars	0.00291237	0.192113	0.401	0.237	0.0169437
Tspan7	0.00287541	0.192105	0.554	0.377	0.0167593
Cops8	0.0109624	0.191928	0.754	0.646	0.0428044
Med8	0.00225951	0.191879	0.557	0.393	0.0139053
1110008F13Rik	0.016481	0.19187	0.788	0.712	0.0561795
Pigp	0.00683004	0.191792	0.714	0.553	0.0303409
Mcm4	0.0129717	0.191684	0.515	0.409	0.0474046
Nsmce1	0.0139741	0.191534	0.788	0.681	0.0500936
Glg1	0.00898389	0.191504	0.727	0.572	0.0375092
C1qtnf2	0.0438018	0.191345	0.308	0.163	0.112758
Ccdc80	0.0915692	0.191233	0.867	0.77	0.18065
Rps5	0.000559497	0.191149	1	1	0.00492296
Tead2	0.0215915	0.191104	0.803	0.743	0.0688257
Sf3b2	0.0411644	0.190986	0.953	0.938	0.108302
Eif4a1	0.128748	0.190818	0.995	1	0.22732
Mrps24	0.0274836	0.190732	0.931	0.883	0.082425
Ppp2r1a	0.0103143	0.19072	0.7	0.584	0.04118
Farsb	0.00347538	0.190574	0.431	0.292	0.0188782
Csnk1e	0.00799377	0.190483	0.626	0.486	0.0344098
Evl	0.0079477	0.190477	0.714	0.588	0.0342577
Mrpl20	0.0261285	0.190441	0.85	0.805	0.0791789
Nup62	0.00457298	0.190372	0.394	0.218	0.0231476
Nptn	0.00300435	0.190319	0.542	0.374	0.0172899
Pdzd11	0.00325771	0.190319	0.534	0.385	0.018159
Aff3	0.0805055	0.190293	0.276	0.136	0.165786
Rap1b	0.0164803	0.190232	0.786	0.712	0.0561795
Spcs1	0.0385617	0.190189	0.906	0.875	0.103241
Rnf20	0.00320553	0.190177	0.549	0.374	0.0180931
Rassf1	0.00606327	0.190155	0.559	0.42	0.0279008
Pdlim7	0.015262	0.190075	0.692	0.599	0.0533333
Hnrnpa1	0.0737739	0.190048	0.995	0.992	0.156815
Magoh	0.0206112	0.190001	0.823	0.732	0.0664302
Dbn1	0.0170314	0.189885	0.741	0.611	0.0576252
Polr1d	0.0431664	0.189879	0.929	0.883	0.111791
Ube2r2	0.0305931	0.189851	0.899	0.872	0.0879517
Hnrnpd	0.0507549	0.189826	0.99	0.957	0.124989
Polr2i	0.022284	0.189794	0.835	0.685	0.0706101
Sub1	0.05652	0.189685	0.998	1	0.134319
Rbm17	0.0109536	0.189619	0.729	0.638	0.0428044
Dnaja2	0.0358424	0.189532	0.901	0.817	0.098154
Ddx1	0.0281621	0.189473	0.887	0.813	0.0836742
Tipin	0.0160941	0.189451	0.589	0.498	0.0553332
Yeats4	0.010679	0.18944	0.741	0.619	0.042006
Cacybp	0.0651057	0.189408	0.882	0.821	0.145622
Prmt1	0.0417005	0.189256	0.995	0.961	0.109442
Klf7	0.0114911	0.18905	0.36	0.198	0.0440078
Zfp644	0.0205801	0.18905	0.818	0.712	0.0663967
Hspa4	0.022777	0.189027	0.761	0.681	0.071887
Tln1	0.0505181	0.188966	0.938	0.864	0.124695
Tuba1b	0.061236	0.188877	0.98	0.973	0.141117
Krcc1	0.0102512	0.188875	0.677	0.541	0.0410821
Ier5	0.0244733	0.188853	0.623	0.51	0.0758911
Thbs1	0.0377522	0.188785	0.32	0.249	0.101584
Lmo4	0.0132904	0.188696	0.68	0.541	0.0482931
Hnrnpa0	0.04493	0.1884	0.988	0.984	0.114166
Rraga	0.0152129	0.188378	0.744	0.619	0.05322
Cct7	0.0444481	0.188345	0.958	0.938	0.113574
Ndufb11	0.0441129	0.188305	0.985	0.946	0.113256
Exosc8	0.00544765	0.188296	0.638	0.444	0.0259699
Pdcd5	0.0605992	0.188292	0.966	0.977	0.140257
Psmd4	0.0325709	0.188287	0.916	0.864	0.0920633
Fip1l1	0.0235666	0.188262	0.793	0.689	0.0739036
Lamp1	0.0408074	0.188205	0.956	0.911	0.107896
Phf5a	0.0310672	0.188145	0.882	0.786	0.0889943
Snw1	0.0228958	0.188037	0.837	0.728	0.0721907
Odc1	0.0662523	0.187985	0.781	0.685	0.14765
Naa15	0.0120973	0.187826	0.633	0.486	0.0453507
Cct8	0.0852733	0.187774	0.978	0.988	0.172272
Psmb1	0.0470131	0.187751	0.99	0.988	0.118236
D10Jhu81e	0.00294266	0.187685	0.493	0.339	0.0170578
Rasl11b	0.0116291	0.187652	0.498	0.346	0.0442182
Golga7	0.0257864	0.187636	0.8	0.65	0.0785894
Rbm4b	0.00338796	0.1874	0.539	0.401	0.0186571
Hnrnpul1	0.00649986	0.187369	0.611	0.467	0.0293355
Chordc1	0.00437279	0.187329	0.537	0.389	0.0225229
Eif4h	0.0395393	0.187223	0.929	0.883	0.104978
Zc3h15	0.0549013	0.187054	0.943	0.891	0.132443
Sdf4	0.014129	0.187031	0.717	0.603	0.0504231
Pcm1	0.0685293	0.18697	0.796	0.759	0.149612
Pdcd11	0.00373938	0.186954	0.547	0.397	0.020006
Pank2	0.00340443	0.186863	0.436	0.296	0.0186899
Aamp	0.0439276	0.186857	0.926	0.864	0.112967
Commd8	0.00403022	0.186828	0.549	0.401	0.0211719
Usp22	0.00520235	0.186828	0.532	0.377	0.025235
Ube2d2a	0.0242137	0.18676	0.803	0.708	0.075159
Atpif1	0.0674026	0.186691	1	0.988	0.149135
Ankrd17	0.00969378	0.18662	0.672	0.549	0.0397005
Btg2	0.578413	0.18657	0.596	0.576	0.613975
Pgrmc1	0.0360347	0.186567	0.813	0.735	0.0982039
Pcmt1	0.00926575	0.186557	0.675	0.521	0.0384348
Tmem147	0.0111119	0.18644	0.707	0.619	0.043177
Rbms1	0.0559138	0.186429	0.776	0.7	0.133275
Copb2	0.0609433	0.186394	0.889	0.79	0.140849
Psma1	0.0318742	0.186341	0.869	0.798	0.0906555
Uqcrb	0.0603483	0.186313	0.961	0.973	0.140088
Ube2l3	0.0340569	0.186234	0.919	0.887	0.0948367
Nfic	0.0191115	0.186126	0.771	0.642	0.0627156
Meis2	0.218525	0.186027	0.98	0.965	0.317712
Wapl	0.00541718	0.185919	0.599	0.455	0.0259407
Igf2r	0.0048414	0.185895	0.443	0.323	0.0241239
Dicer1	0.0063358	0.18586	0.451	0.335	0.028765
Hdac2	0.0318452	0.185842	0.872	0.778	0.0906555
Adamtsl1	0.0557709	0.185822	0.325	0.202	0.133233
Ssr4	0.079529	0.185803	0.919	0.852	0.164625
Hjurp	0.0119179	0.185786	0.382	0.253	0.0448887
Pum1	0.0193863	0.18572	0.707	0.65	0.063295
Snx6	0.0318625	0.185489	0.862	0.774	0.0906555
Mettl1	0.0146702	0.185476	0.626	0.451	0.0517752
Commd7	0.00660298	0.18542	0.626	0.479	0.0296207
Psma2	0.0679595	0.185208	0.938	0.926	0.149612
Mmp23	0.0274702	0.185189	0.36	0.257	0.082425
Arhgap5	0.0458622	0.185146	0.828	0.716	0.115706
Rbm7	0.00635409	0.185051	0.64	0.502	0.028765
Ddb1	0.0179171	0.185019	0.764	0.696	0.0596117
Lta4h	0.00344646	0.184978	0.567	0.409	0.0188171
Fabp5	0.0319577	0.184964	0.586	0.455	0.0908122
Cuedc1	0.00630067	0.184959	0.557	0.432	0.0286671
Mrpl42	0.066012	0.184959	0.904	0.837	0.147236
Lrpap1	0.017619	0.184957	0.768	0.63	0.0589886
Ccdc102a	0.0131836	0.184918	0.635	0.568	0.0479596
Strap	0.0344504	0.184656	0.815	0.751	0.0953505
Aldh7a1	0.012737	0.184471	0.7	0.611	0.0467072
Txndc12	0.00665064	0.18446	0.643	0.51	0.0297093
Mrps17	0.0190812	0.184391	0.788	0.685	0.0627009
Tmem115	0.00490959	0.184265	0.426	0.261	0.024312
Rtraf	0.0708924	0.184212	0.988	0.981	0.152787
Lrrc42	0.00634175	0.184179	0.515	0.401	0.028765
Tram1	0.00481845	0.184122	0.409	0.28	0.0240847
Smarca2	0.0186537	0.184066	0.695	0.556	0.0614859
Arl1	0.0634073	0.183962	0.953	0.946	0.143939
Ndufv1	0.0287217	0.183931	0.828	0.747	0.0847849
Zfp638	0.0135561	0.183924	0.663	0.506	0.0489244
Ctdsp2	0.0175893	0.183898	0.754	0.681	0.0589509
Cenpk	0.0646384	0.183889	0.259	0.128	0.145504
Eif4g1	0.0417883	0.183714	0.764	0.685	0.109493
Srsf11	0.0761491	0.183574	0.929	0.907	0.160112
Cd248	0.0110683	0.183502	0.495	0.362	0.04306
Parl	0.00415248	0.183333	0.51	0.354	0.021601
Lrp1	0.0278603	0.18276	0.756	0.654	0.0830092
Tmem263	0.00447658	0.182666	0.532	0.377	0.0228041
Selenon	0.00547048	0.182626	0.589	0.44	0.0260011
B230118H07Rik	0.0074548	0.182431	0.631	0.506	0.032714
Hars	0.00597922	0.182408	0.591	0.451	0.0276777
P3h1	0.00527587	0.182381	0.51	0.374	0.0253782
Mcm5	0.0117981	0.182254	0.505	0.374	0.0445426
Sec13	0.0213204	0.182245	0.754	0.658	0.0680973
Rhoj	0.0075122	0.182238	0.498	0.37	0.0328235
Thoc3	0.0143802	0.182027	0.68	0.572	0.0510337
Cnep1r1	0.00466845	0.181965	0.436	0.261	0.0234774
Usp46	0.00662394	0.181942	0.53	0.409	0.0296467
Ccdc124	0.0269376	0.181803	0.749	0.7	0.0810922
Tsn	0.0643909	0.181362	0.879	0.813	0.145346
Nxt1	0.00526399	0.181299	0.5	0.389	0.0253592
Psap	0.0436594	0.181297	0.835	0.77	0.11264
Taldo1	0.0472866	0.181145	0.906	0.848	0.118644
Pafah1b2	0.0186745	0.180993	0.695	0.595	0.0614911
Rpl10a	0.0140648	0.180941	1	1	0.0503622
Rpl41	0.00398873	0.180807	1	1	0.0210375
Chmp5	0.017281	0.180738	0.732	0.623	0.0582728
Cox19	0.00566956	0.180718	0.616	0.428	0.0267088
Ppp4r2	0.0269339	0.180709	0.744	0.642	0.0810922
Kras	0.0316047	0.180663	0.682	0.572	0.0901297
Luc7l2	0.0922933	0.180554	0.924	0.903	0.181563
Snrpe	0.0923164	0.180467	0.983	0.961	0.181563
Serp1	0.011455	0.180451	0.658	0.549	0.043975
Scamp3	0.00782025	0.180403	0.562	0.444	0.0337996
Gpx8	0.0611821	0.180247	0.901	0.825	0.141094
Psmd14	0.0175781	0.180243	0.714	0.564	0.0589509
Cbfb	0.019275	0.180209	0.34	0.191	0.0630196
Polr2j	0.0330183	0.180148	0.857	0.739	0.0929987
Lsm3	0.0332817	0.180118	0.815	0.696	0.0934416
Map1lc3b	0.0777406	0.180074	0.938	0.903	0.162184
Hikeshi	0.0156464	0.180062	0.672	0.549	0.0542023
Chmp4b	0.0407805	0.180055	0.85	0.786	0.107896
Nans	0.0086389	0.180042	0.603	0.471	0.0364019
Ndufs2	0.0802768	0.180031	0.951	0.942	0.165673
Puf60	0.0506606	0.17999	0.906	0.829	0.124853
Bola3	0.00955456	0.179911	0.618	0.498	0.039479
Luc7l3	0.0733027	0.179902	0.879	0.794	0.156421
Wdr18	0.0154506	0.179781	0.589	0.486	0.0538158
Pcolce	0.0789993	0.179725	0.882	0.86	0.16406
Med19	0.00568135	0.179609	0.547	0.401	0.0267249
Zfyve21	0.0114879	0.179552	0.549	0.428	0.0440078
Pgls	0.0919967	0.179462	0.968	0.934	0.181157
Atf4	0.0406041	0.179452	0.709	0.564	0.107537
Hectd1	0.0275957	0.179407	0.781	0.658	0.082606
Slc25a4	0.106491	0.179379	0.998	1	0.200904
Gtf2b	0.00807396	0.179274	0.554	0.44	0.0345687
Arhgdia	0.0688408	0.179268	0.897	0.833	0.149956
Acyp2	0.00425485	0.17921	0.478	0.315	0.0219902
Gps1	0.0291933	0.179175	0.818	0.696	0.0854508
Chchd3	0.00896614	0.179126	0.579	0.479	0.0375092
Ddx17	0.0500639	0.179099	0.764	0.673	0.124053
Gmnn	0.0205246	0.179037	0.365	0.268	0.0662849
Cdk13	0.00583471	0.179021	0.53	0.381	0.0271414
Ndufb5	0.0879031	0.178992	0.985	0.953	0.176084
Bsg	0.127143	0.178899	0.99	0.984	0.225759
Exosc4	0.00931769	0.178845	0.645	0.521	0.0386001
Mrpl18	0.0441589	0.178793	0.837	0.751	0.113256
Map2k2	0.0554251	0.178787	0.894	0.829	0.133064
Srpk1	0.0108699	0.178712	0.571	0.447	0.0426113
Baz2b	0.0238157	0.178583	0.599	0.475	0.0742262
Epc1	0.00744952	0.178539	0.429	0.233	0.032714
Ezh2	0.0303007	0.178353	0.599	0.479	0.0872683
Mocs2	0.0134002	0.178339	0.697	0.494	0.0485265
Cebpz	0.0237092	0.178241	0.66	0.584	0.074086
Rpl14	0.0343264	0.178122	1	1	0.0950899
S100a10	0.398364	0.178078	0.988	0.992	0.461173
Timm50	0.0112479	0.178064	0.667	0.482	0.0435542
Ube2d3	0.0813458	0.177945	0.951	0.914	0.166871
Rpp21	0.0133235	0.177742	0.564	0.436	0.0483583
Ndufa3	0.119525	0.177714	0.946	0.911	0.21753
Nsd3	0.00979569	0.177601	0.571	0.451	0.0400095
Lactb	0.0256492	0.177601	0.342	0.183	0.0783209
Gnas	0.389571	0.177512	0.998	1	0.453624
Sgta	0.0336107	0.177498	0.8	0.681	0.0939218
Efemp2	0.0812818	0.177492	0.911	0.872	0.166871
Orc6	0.0134329	0.177317	0.537	0.428	0.0485897
Scaf11	0.0521054	0.17727	0.828	0.755	0.127253
1110004F10Rik	0.113947	0.177268	0.966	0.961	0.211107
Ralb	0.0191249	0.177249	0.66	0.533	0.0627156
Psma6	0.0728817	0.177115	0.911	0.887	0.155917
Pdcd6	0.0285153	0.17703	0.764	0.654	0.0844096
Bptf	0.0655752	0.17692	0.818	0.755	0.146467
Sh3gl1	0.0078408	0.176914	0.525	0.409	0.0338426
1110038F14Rik	0.0508255	0.176903	0.901	0.786	0.125067
Ralgps2	0.0117735	0.176651	0.502	0.37	0.0445426
Pofut2	0.0235779	0.176609	0.697	0.58	0.0739036
Rtn3	0.0135149	0.176541	0.594	0.486	0.0488309
Sumo1	0.0970894	0.176536	0.958	0.946	0.187487
Mrpl41	0.0151099	0.176535	0.64	0.498	0.053034
Zrsr2	0.0251269	0.176523	0.736	0.626	0.0771359
Tmed1	0.0123418	0.176447	0.631	0.514	0.0457306
Rheb	0.041952	0.176387	0.84	0.724	0.109832
Anp32e	0.058352	0.176348	0.764	0.693	0.13775
Ahsa2	0.00616399	0.176289	0.547	0.401	0.0282113
Dhrs4	0.025928	0.176253	0.712	0.615	0.0787954
Cfdp1	0.0985617	0.176138	0.973	0.961	0.1901
Napa	0.0283756	0.176108	0.736	0.669	0.0840738
Eef1d	0.110628	0.175892	0.993	0.977	0.206634
Mrpl13	0.0443768	0.175836	0.83	0.747	0.113573
Uqcc2	0.0846982	0.175775	0.956	0.911	0.171436
Sumo3	0.0756259	0.17567	0.874	0.821	0.159228
Sltm	0.0672198	0.175616	0.719	0.638	0.148992
Git2	0.0144034	0.175245	0.431	0.276	0.0510595
Eif3h	0.115858	0.175031	0.995	0.984	0.213338
Cbx5	0.110226	0.175012	0.759	0.724	0.206004
Ehd1	0.0126178	0.174999	0.483	0.366	0.0464343
Chpt1	0.0105345	0.174693	0.53	0.401	0.0416426
Tacc3	0.090193	0.174659	0.276	0.148	0.178846
Spag7	0.032383	0.174609	0.796	0.673	0.0916943
Hsd17b10	0.104444	0.174537	0.941	0.907	0.198215
Gorasp2	0.00855143	0.174533	0.527	0.37	0.0361765
Atp6v0e	0.0564154	0.174482	0.84	0.767	0.13417
Ntng1	0.423152	0.174455	0.153	0.058	0.480978
Itpa	0.012167	0.174442	0.589	0.451	0.0454519
Insig1	0.0580506	0.174417	0.303	0.136	0.137235
Atrx	0.186892	0.17438	0.926	0.903	0.288519
Gsk3b	0.0687482	0.174325	0.808	0.732	0.149885
Ube2f	0.00984392	0.174226	0.451	0.358	0.0401039
Smarcb1	0.0388315	0.174207	0.778	0.693	0.103657
Ndn	0.0684288	0.174138	0.778	0.673	0.149612
Slirp	0.0384035	0.174106	0.796	0.646	0.10299
Add3	0.077989	0.174089	0.813	0.728	0.16248
Eif1a	0.0219871	0.173995	0.616	0.502	0.0699469
Pitpna	0.0332926	0.173995	0.751	0.638	0.0934416
Tkt	0.126985	0.173975	0.943	0.93	0.225759
Kmt5b	0.0101064	0.173931	0.406	0.253	0.040809
H1fx	0.265686	0.173905	0.948	0.899	0.359577
Brk1	0.0675533	0.173886	0.889	0.844	0.149135
Cap1	0.0153009	0.173808	0.655	0.506	0.0534109
Nav1	0.020904	0.173772	0.458	0.342	0.067238
Ndufb2	0.0675016	0.17371	0.833	0.72	0.149135
Sae1	0.0694563	0.17351	0.83	0.751	0.150532
Elavl1	0.0495419	0.173508	0.82	0.72	0.12295
Ppp4c	0.0120153	0.173428	0.574	0.416	0.0452026
Ik	0.0476888	0.173294	0.741	0.696	0.119185
Eef1e1	0.00959709	0.173257	0.433	0.28	0.0396035
Kctd5	0.0163388	0.173247	0.374	0.179	0.0558139
Srsf10	0.055086	0.17309	0.815	0.767	0.132788
Got2	0.0135986	0.173022	0.515	0.393	0.0490225
Magt1	0.0342184	0.172905	0.69	0.556	0.0949553
Ss18	0.0114343	0.172895	0.594	0.467	0.0439538
Fmc1	0.0185417	0.172895	0.567	0.459	0.06118
Wdr82	0.00754808	0.172846	0.446	0.292	0.0329352
Fkbp4	0.123958	0.172778	0.906	0.825	0.222678
Dpm3	0.104765	0.172769	0.933	0.899	0.198352
Pmf1	0.00903876	0.17272	0.495	0.37	0.037689
Gtf2e2	0.0156208	0.172716	0.584	0.479	0.0542023
Tor2a	0.0221034	0.172644	0.623	0.498	0.0702471
Slc35b1	0.0113079	0.172638	0.557	0.436	0.0436727
Khsrp	0.00802057	0.172631	0.466	0.307	0.0344175
Irak1bp1	0.023207	0.172631	0.416	0.315	0.0729559
Gnai3	0.0595032	0.17257	0.736	0.619	0.139256
Mrpl28	0.0478511	0.172516	0.805	0.728	0.119497
Eif3m	0.133574	0.172409	0.983	0.973	0.233015
Selenok	0.138882	0.172403	0.951	0.926	0.238955
Polr2a	0.0334996	0.172373	0.667	0.584	0.0936932
Commd3	0.0774251	0.172302	0.894	0.813	0.161832
Pitpnb	0.01157	0.172261	0.633	0.451	0.0440987
Tax1bp3	0.0293411	0.172259	0.7	0.576	0.0854508
Bclaf1	0.0672656	0.172106	0.828	0.716	0.148992
Psmb7	0.0541905	0.172053	0.813	0.716	0.131224
Ppil1	0.00872443	0.172033	0.495	0.358	0.0366656
Gpm6b	0.0133895	0.171979	0.525	0.362	0.0485265
Psmc1	0.0692303	0.171936	0.825	0.724	0.150321
Sem1	0.138857	0.171933	0.995	0.992	0.238955
Rer1	0.0603117	0.171901	0.879	0.763	0.140088
Mmadhc	0.0103062	0.171828	0.539	0.424	0.04118
Cdk2ap2	0.0290416	0.171756	0.34	0.179	0.0854134
Vps35	0.0245747	0.171746	0.67	0.572	0.0761317
Hsp90ab1	0.143665	0.171744	1	1	0.243118
Snrpd3	0.0925189	0.171736	0.926	0.891	0.181738
Ccnd3	0.0959071	0.171708	0.83	0.751	0.18633
Tomm5	0.0671905	0.171704	0.869	0.782	0.148992
Trim33	0.0103129	0.1717	0.473	0.296	0.04118
Setd2	0.00852272	0.171692	0.453	0.339	0.0361029
Kpna4	0.0112538	0.171663	0.544	0.401	0.0435542
Sf1	0.0142516	0.171651	0.574	0.416	0.0506899
Uqcrc2	0.081338	0.171645	0.909	0.879	0.166871
Stx16	0.0198358	0.171628	0.613	0.533	0.0644511
Atp6v0d1	0.0251999	0.171604	0.675	0.549	0.0772441
Fkbp9	0.0342082	0.171595	0.69	0.615	0.0949553
Ctsd	0.0372263	0.171576	0.749	0.654	0.100849
Pawr	0.0104143	0.171501	0.51	0.354	0.0414753
Nop58	0.143371	0.171495	0.852	0.794	0.242902
Phf14	0.0610032	0.171441	0.776	0.7	0.140885
Psmd11	0.0638521	0.171428	0.83	0.767	0.144334
Metrn	0.00862892	0.171332	0.466	0.335	0.0364019
Tsen15	0.0107119	0.171332	0.525	0.358	0.0420834
Lyar	0.0377088	0.171332	0.722	0.603	0.101553
Hmgb1	0.126537	0.171332	0.998	0.996	0.225283
Mrpl3	0.0125526	0.171171	0.601	0.424	0.0463233
Nme2	0.127228	0.171099	0.268	0.101	0.225759
Cyfip1	0.0359857	0.171078	0.69	0.634	0.098154
Emc3	0.0227213	0.171048	0.645	0.51	0.0717823
Gfer	0.0122373	0.171009	0.594	0.455	0.0456079
Mea1	0.0125598	0.171009	0.591	0.432	0.0463233
Thumpd1	0.00961692	0.170975	0.485	0.358	0.0396341
Ccnt1	0.00966525	0.170975	0.48	0.323	0.0396878
Nr2f2	0.36762	0.170859	0.98	0.977	0.435042
Clk4	0.009342	0.170758	0.431	0.28	0.0386507
Elovl1	0.010057	0.170758	0.426	0.288	0.0407641
Sfswap	0.0121437	0.17063	0.495	0.354	0.0454519
Nap1l4	0.0524008	0.170565	0.803	0.704	0.12786
Akirin1	0.0145668	0.170528	0.392	0.233	0.0514673
Cavin3	0.102318	0.170452	0.394	0.339	0.195456
Olfm1	0.0161483	0.170355	0.534	0.416	0.05546
Scfd1	0.0183182	0.170273	0.611	0.482	0.0606933
Nucb1	0.0392594	0.170209	0.759	0.607	0.104422
Rars	0.0303459	0.170099	0.635	0.615	0.0873198
Cisd2	0.0177613	0.170073	0.576	0.424	0.0593407
Eif3c	0.134493	0.170037	0.963	0.918	0.234098
Gstm2	0.0516159	0.170003	0.653	0.498	0.126524
Gas6	0.121786	0.16997	0.31	0.241	0.22013
Dnajc7	0.069469	0.16993	0.798	0.704	0.150532
Pafah1b1	0.124225	0.169925	0.901	0.833	0.223033
Yae1d1	0.0141292	0.169885	0.579	0.451	0.0504231
Smarca4	0.0394383	0.169843	0.638	0.518	0.104797
Mettl9	0.11083	0.169799	0.941	0.914	0.206891
9530068E07Rik	0.0331765	0.16978	0.727	0.595	0.0933484
Supt16	0.0863466	0.169743	0.788	0.732	0.173672
Rpl39	0.112618	0.16968	1	1	0.209372
Acaa1a	0.0253865	0.169649	0.68	0.553	0.0776157
Fez2	0.00908061	0.169585	0.527	0.374	0.0378142
Chaf1b	0.195939	0.169576	0.224	0.128	0.297731
Srp68	0.0144722	0.169554	0.584	0.412	0.0512464
Itgb5	0.0278946	0.169547	0.436	0.307	0.0830339
Sh3glb1	0.106936	0.169516	0.916	0.887	0.201626
Ndufa1	0.0817683	0.169459	0.85	0.763	0.167523
Rit1	0.012302	0.169425	0.431	0.292	0.0456952
Grcc10	0.0106089	0.169405	0.525	0.358	0.041833
Paics	0.0621295	0.169366	0.773	0.743	0.142559
Zfp91	0.0957467	0.169275	0.828	0.809	0.186245
Oser1	0.0100143	0.169224	0.549	0.374	0.0406427
Prpsap1	0.0237289	0.169141	0.631	0.521	0.074086
Gemin7	0.029584	0.169076	0.69	0.556	0.0858231
Exoc7	0.0138777	0.169007	0.537	0.44	0.0498598
Bin1	0.0209301	0.168948	0.616	0.471	0.0672542
Gnaq	0.0315711	0.168793	0.571	0.459	0.0901145
Creb3l1	0.0123036	0.168784	0.515	0.342	0.0456952
Ube2g1	0.0148497	0.168772	0.399	0.288	0.052351
Csnk1a1	0.155562	0.168641	0.978	0.961	0.257044
Csde1	0.116027	0.16855	0.867	0.821	0.213473
Trim28	0.0967677	0.168527	0.833	0.747	0.186979
Ehd2	0.0899107	0.168429	0.283	0.148	0.178611
Kcnb2	0.496395	0.168342	0.145	0.043	0.54484
Tmed10	0.176755	0.168314	0.961	0.957	0.279112
2810474O19Rik	0.144252	0.168257	0.65	0.549	0.243877
Rnps1	0.035841	0.168242	0.655	0.545	0.098154
Cpxm1	0.0455232	0.168233	0.608	0.525	0.115306
Mrps21	0.0683383	0.168205	0.86	0.794	0.149612
Nup43	0.0194007	0.168152	0.382	0.272	0.063295
Arpc5l	0.0334941	0.168152	0.707	0.591	0.0936932
Mrps18c	0.0332009	0.167936	0.638	0.545	0.0933484
Parva	0.0870267	0.167907	0.771	0.685	0.17449
Gspt1	0.103106	0.167817	0.855	0.805	0.19659
Nav2	0.0253548	0.167732	0.347	0.226	0.0776157
Cops3	0.057748	0.167498	0.751	0.708	0.136627
Slbp	0.0894574	0.167498	0.697	0.607	0.178468
Casp8ap2	0.0475297	0.16735	0.522	0.51	0.118973
Srsf1	0.043399	0.167344	0.692	0.595	0.112059
Mrpl17	0.084143	0.167286	0.781	0.708	0.170782
Epha4	0.417107	0.167242	0.153	0.062	0.476179
Cct3	0.268887	0.167133	0.958	0.961	0.362373
Phip	0.125586	0.167088	0.803	0.708	0.224467
Rbm39	0.254289	0.167081	0.993	0.996	0.349767
Hmg20b	0.0512075	0.167078	0.67	0.63	0.125716
Taf6l	0.0157685	0.16706	0.517	0.389	0.0545663
Med9	0.0151829	0.167053	0.562	0.444	0.0531736
Zc3h13	0.111852	0.166978	0.83	0.716	0.20819
Hook3	0.0453182	0.166944	0.68	0.576	0.114969
Bloc1s2	0.0105748	0.166877	0.515	0.339	0.0417502
Bmyc	0.0248621	0.166799	0.601	0.521	0.0766943
Hells	0.0464089	0.166791	0.397	0.292	0.116809
Sdhaf1	0.0169607	0.166787	0.512	0.412	0.0574471
Nap1l1	0.243334	0.166786	0.97	0.961	0.34118
Drg2	0.0130557	0.16678	0.478	0.319	0.0476571
Rpl36a	0.186845	0.166768	1	1	0.288519
Podxl2	0.0300535	0.166718	0.591	0.475	0.0866344
Tmem121	0.0567536	0.16666	0.318	0.218	0.134674
Cux1	0.0453999	0.16654	0.722	0.56	0.115085
Ssna1	0.0392647	0.166467	0.722	0.591	0.104422
Mrps26	0.0368043	0.166454	0.695	0.549	0.09996
Psmd1	0.10539	0.166442	0.818	0.743	0.19918
Psmc3	0.15384	0.166394	0.931	0.907	0.255121
Dync1h1	0.0290017	0.166381	0.544	0.424	0.0854134
Mcm7	0.0721954	0.166329	0.594	0.518	0.154997
Sf3b5	0.115111	0.166325	0.906	0.852	0.212522
Eef1b2	0.182874	0.166273	1	1	0.284233
Acin1	0.0520731	0.166122	0.833	0.743	0.127253
Chaf1a	0.055339	0.166093	0.303	0.187	0.133064
Ddx24	0.0737926	0.166046	0.796	0.724	0.156815
Tagln2	0.153935	0.165976	0.966	0.914	0.255132
Dnlz	0.038847	0.165941	0.665	0.584	0.103657
Emp1	0.0547399	0.16588	0.599	0.529	0.132154
Ndufv2	0.14128	0.16585	0.936	0.895	0.24118
Gulp1	0.0214324	0.165835	0.453	0.358	0.0683865
Eef1a1	0.214632	0.165829	1	1	0.31423
Ap2s1	0.127038	0.165818	0.862	0.821	0.225759
Gnb2	0.205688	0.165764	0.99	0.965	0.307569
Srpr	0.042921	0.165718	0.741	0.615	0.111643
Lsm14a	0.0199221	0.165601	0.562	0.471	0.0646658
Ptpn1	0.0248347	0.165584	0.606	0.475	0.0766943
Rab14	0.159117	0.165574	0.936	0.895	0.260492
Gjc1	0.0607401	0.165566	0.724	0.615	0.140481
Msl1	0.0129667	0.165503	0.522	0.366	0.0474046
Knop1	0.0649043	0.165462	0.734	0.681	0.145504
Nono	0.142801	0.165415	0.958	0.922	0.24248
Fyttd1	0.0490984	0.165356	0.635	0.541	0.122134
Ccdc25	0.0238202	0.165323	0.389	0.265	0.0742262
Ptges3	0.159053	0.165253	0.86	0.844	0.260492
Uri1	0.0178987	0.165192	0.539	0.405	0.0596117
Frem1	0.0693119	0.165169	0.746	0.7	0.150395
Col6a1	0.265126	0.165163	0.815	0.751	0.359254
Vdac2	0.16042	0.165114	0.941	0.922	0.262356
Usf1	0.0192768	0.165111	0.416	0.288	0.0630196
Ppp1r12a	0.0584094	0.165027	0.704	0.611	0.137784
Smu1	0.0400008	0.165007	0.687	0.568	0.106027
Brd1	0.0367105	0.164949	0.645	0.518	0.0997902
Ndufa8	0.154055	0.164902	0.911	0.883	0.255132
Ctnna1	0.109644	0.164859	0.869	0.759	0.205393
Cd47	0.0782738	0.164841	0.596	0.502	0.162871
Ehmt1	0.0293577	0.164821	0.623	0.49	0.0854508
Tmx2	0.0257262	0.164806	0.372	0.233	0.0784809
Epb41l2	0.067254	0.164756	0.682	0.584	0.148992
Ubtf	0.086876	0.16474	0.783	0.696	0.174407
Asf1a	0.034125	0.164685	0.623	0.537	0.0949436
Upf3b	0.0308513	0.164643	0.623	0.533	0.0885348
Borcs8	0.0187901	0.164513	0.446	0.358	0.061808
Ggnbp2	0.029019	0.164493	0.581	0.49	0.0854134
Gars	0.021263	0.164454	0.571	0.451	0.0679821
Rock2	0.0714632	0.164411	0.734	0.607	0.15381
Fam92a	0.137222	0.164411	0.783	0.735	0.237168
Rsl1d1	0.116515	0.164357	0.815	0.716	0.213878
Srp54a	0.0733432	0.164349	0.3	0.14	0.156421
Ubap2l	0.119433	0.164334	0.833	0.79	0.21753
Bola2	0.076772	0.164289	0.761	0.696	0.161216
Mrpl2	0.0258215	0.164186	0.557	0.432	0.0786215
Rsf1	0.062368	0.164143	0.623	0.533	0.142798
Ywhag	0.029124	0.164103	0.419	0.307	0.0854508
Spats2	0.0167563	0.164044	0.517	0.42	0.0569357
2410002F23Rik	0.016556	0.164016	0.475	0.37	0.0563751
Pkn2	0.0623519	0.164006	0.719	0.677	0.142798
Pmp22	0.0942361	0.164006	0.667	0.576	0.184543
Cenpb	0.0699742	0.163947	0.781	0.634	0.151524
Rpap3	0.0162148	0.163939	0.433	0.307	0.0555975
Eif1b	0.183303	0.163861	0.897	0.84	0.284762
Arid4b	0.0879318	0.163696	0.739	0.673	0.176084
Lxn	0.0212019	0.163625	0.382	0.237	0.0678546
Skp1a	0.15482	0.163616	0.857	0.813	0.255949
Camk1	0.0597334	0.163572	0.736	0.63	0.139567
Irak1	0.0280037	0.163549	0.389	0.276	0.0832809
Sec11a	0.138379	0.163458	0.899	0.864	0.238651
Mbd3	0.142952	0.163178	0.956	0.922	0.24248
Snrpf	0.25338	0.163139	0.988	0.946	0.349355
Kif1b	0.043291	0.163111	0.478	0.393	0.11187
Apex1	0.0631467	0.163094	0.732	0.638	0.143552
Smc4	0.0749809	0.163093	0.599	0.51	0.158392
Pcsk5	0.20633	0.163048	0.259	0.117	0.308276
Cct4	0.198317	0.162997	0.983	0.946	0.299775
Coa3	0.125952	0.162942	0.892	0.852	0.224869
Tbrg1	0.123623	0.16294	0.837	0.778	0.222326
Rfc1	0.113197	0.162882	0.751	0.72	0.210204
Sod1	0.0686186	0.162872	0.724	0.611	0.149705
Surf4	0.0431254	0.16286	0.672	0.556	0.111791
Smarcc2	0.0231527	0.162824	0.438	0.304	0.0728568
Ppan	0.0251266	0.162785	0.456	0.315	0.0771359
Svbp	0.17276	0.162738	0.825	0.794	0.275623
Hmox2	0.0751371	0.162677	0.771	0.693	0.158524
Dld	0.0328488	0.162585	0.67	0.556	0.0927666
Cirbp	0.0392636	0.162585	0.613	0.479	0.104422
Nudt4	0.0333821	0.162476	0.574	0.471	0.0936106
Pik3r1	0.0996498	0.162368	0.623	0.568	0.191851
Fbn2	0.324688	0.162292	0.764	0.72	0.403209
Ppic	0.253902	0.162262	0.948	0.922	0.349703
Sucla2	0.0372738	0.162251	0.665	0.553	0.100892
Arap1	0.0574645	0.162211	0.69	0.58	0.136058
Gde1	0.0173552	0.162153	0.517	0.385	0.0584114
Phlda3	0.0816662	0.162032	0.764	0.634	0.167421
Ryk	0.0780353	0.162026	0.744	0.681	0.16248
Polr3gl	0.0259972	0.161986	0.401	0.28	0.0789306
1700123O20Rik	0.0249395	0.161945	0.557	0.455	0.0768145
Sdhd	0.0348092	0.161928	0.643	0.521	0.0961771
Snrpa	0.12628	0.16187	0.855	0.77	0.225076
Ppp2r2d	0.0181766	0.161762	0.5	0.358	0.0603493
Stag1	0.0536881	0.161762	0.677	0.568	0.130403
Rps20	0.270994	0.161714	1	1	0.364598
Ndufb10	0.196135	0.161687	0.958	0.934	0.297744
Fgfr1	0.0547383	0.161607	0.663	0.518	0.132154
Egln2	0.037439	0.161593	0.633	0.51	0.101164
Ptpn2	0.0200292	0.161565	0.522	0.401	0.0648815
Yeats2	0.015788	0.161558	0.5	0.331	0.0545745
Rpl7l1	0.0966709	0.16152	0.805	0.732	0.186979
Igf1	0.630198	0.161479	0.121	0.039	0.659519
Atp5l	0.363294	0.161448	0.995	0.981	0.431201
Scarf2	0.0258949	0.161381	0.539	0.377	0.0787698
Efr3a	0.0338242	0.161311	0.377	0.261	0.0943534
Brd7	0.0721882	0.161094	0.756	0.634	0.154997
Nrk	0.19332	0.161022	0.264	0.152	0.295155
Calu	0.164232	0.161003	0.879	0.833	0.266408
Nsg1	0.0431163	0.160983	0.461	0.377	0.111791
Epn1	0.0348867	0.16088	0.591	0.482	0.0962248
Uqcrfs1	0.144932	0.160863	0.83	0.774	0.244538
Map1b	0.179361	0.160794	0.239	0.163	0.28168
Mtx1	0.0184726	0.160785	0.542	0.377	0.0610335
Mrpl12	0.095404	0.160717	0.852	0.732	0.185995
Pet100	0.0604282	0.160678	0.682	0.553	0.140088
Aacs	0.25343	0.160674	0.214	0.097	0.349355
Gtpbp4	0.0649166	0.160647	0.618	0.533	0.145504
Rab34	0.121114	0.160587	0.81	0.724	0.219545
Fam136a	0.02916	0.1605	0.599	0.467	0.0854508
0610009B22Rik	0.0155243	0.160497	0.478	0.339	0.0539548
Rpsa	0.377077	0.160471	1	1	0.443441
Anapc11	0.0898226	0.16041	0.8	0.728	0.178611
Atp2a2	0.0239306	0.160388	0.498	0.381	0.0743526
Cfh	0.88122	0.160386	0.961	0.942	0.890984
Ubl4a	0.0410988	0.16034	0.581	0.482	0.108219
Ctcf	0.108209	0.160305	0.825	0.751	0.203544
Glipr2	0.115412	0.160239	0.739	0.623	0.212955
Zfp507	0.080377	0.160233	0.296	0.156	0.165673
Med21	0.0457876	0.160181	0.7	0.615	0.115609
Serinc1	0.0601699	0.160137	0.727	0.599	0.139973
Etaa1os	0.328556	0.160076	0.209	0.066	0.406737
Tmod2	0.408266	0.160076	0.19	0.054	0.469573
Dpm2	0.0206872	0.159953	0.505	0.381	0.0666076
Eif4e2	0.143709	0.159901	0.877	0.809	0.243118
Hoxa10	0.361337	0.159853	0.837	0.813	0.429563
Brd3	0.14023	0.159732	0.751	0.685	0.240286
Mycbp	0.0226981	0.159709	0.478	0.342	0.0717799
Svil	0.13951	0.159602	0.729	0.623	0.239825
Txn1	0.434907	0.159592	0.993	0.984	0.491321
Gbf1	0.0234938	0.159579	0.495	0.377	0.0737848
Ufc1	0.122311	0.159428	0.869	0.809	0.220555
Prpf19	0.0898892	0.159388	0.783	0.638	0.178611
Usmg5	0.231077	0.159379	0.941	0.868	0.330524
Tada3	0.0183027	0.159362	0.438	0.292	0.0606933
Selenof	0.300061	0.15933	0.99	0.984	0.384345
Nradd	0.0298576	0.159011	0.48	0.412	0.0863034
Ppih	0.0297659	0.159005	0.554	0.424	0.0861162
Skp2	0.0269888	0.158969	0.35	0.245	0.0811697
Eif4ebp2	0.0178637	0.158909	0.502	0.362	0.0595581
Hoxa5	0.0638216	0.158909	0.345	0.218	0.144334
Cox6b1	0.370043	0.158909	0.985	0.984	0.4371
Lysmd2	0.0265596	0.158753	0.475	0.397	0.0803139
Med28	0.0625871	0.158753	0.702	0.615	0.143092
Nom1	0.0310038	0.158727	0.36	0.245	0.0888923
Rps7	0.455704	0.158637	1	1	0.508389
Cgnl1	0.0320977	0.158601	0.483	0.37	0.0910481
Snai2	0.234583	0.158578	0.931	0.852	0.333151
St13	0.295901	0.15857	0.941	0.903	0.381867
Ak2	0.0919435	0.158462	0.69	0.611	0.181157
Tsnax	0.035732	0.158457	0.64	0.498	0.0980502
Prpf38a	0.0282902	0.158428	0.591	0.459	0.0839693
Anapc4	0.0267574	0.158371	0.574	0.447	0.0807779
Ctsb	0.0755342	0.158312	0.712	0.661	0.15914
Copb1	0.0803053	0.158271	0.783	0.7	0.165673
Srp72	0.158069	0.15821	0.857	0.805	0.259648
Plekhg2	0.019983	0.158202	0.49	0.288	0.0647977
Cep350	0.0287156	0.158146	0.394	0.276	0.0847849
Ndufs6	0.173528	0.15807	0.909	0.852	0.275882
Lman1	0.172906	0.15801	0.887	0.817	0.275717
Nectin3	0.020189	0.157982	0.461	0.331	0.065267
Aldh2	0.308515	0.157882	0.943	0.911	0.391024
Brd2	0.0865877	0.157851	0.616	0.533	0.174047
Arpc5	0.125793	0.157827	0.842	0.767	0.224712
Tpm4	0.410635	0.15773	0.995	0.988	0.470896
Cops7a	0.0276883	0.157715	0.574	0.459	0.0827283
Tug1	0.0238747	0.157695	0.49	0.37	0.0743034
Nsfl1c	0.0964757	0.157678	0.788	0.704	0.186867
Rp9	0.269382	0.157556	0.914	0.844	0.362887
Rtcb	0.0953724	0.157538	0.766	0.704	0.185995
Lbh	0.432288	0.157429	0.906	0.872	0.488926
Cbx1	0.319838	0.157423	0.963	0.926	0.399436
Zfr	0.0554245	0.157376	0.608	0.494	0.133064
Rpl8	0.42201	0.157368	1	1	0.480363
Eid1	0.268045	0.157304	0.975	0.946	0.361697
Tmem208	0.0593578	0.157227	0.633	0.564	0.139139
Glod4	0.0498374	0.15719	0.695	0.533	0.123588
Brix1	0.0589372	0.157155	0.695	0.553	0.138317
Rab5c	0.0846641	0.157026	0.719	0.623	0.171436
Lpp	0.1139	0.157017	0.539	0.471	0.211107
Gtf2h5	0.185831	0.157014	0.929	0.899	0.287709
Utp11	0.118071	0.157012	0.796	0.728	0.215866
Agtr2	0.168264	0.156988	0.278	0.191	0.270748
Utrn	0.0386377	0.156901	0.379	0.284	0.103358
Zwint	0.056566	0.156895	0.672	0.564	0.134329
Psenen	0.104235	0.156893	0.778	0.696	0.198171
Litaf	0.027786	0.156848	0.522	0.397	0.0829424
Yap1	0.0250168	0.156802	0.424	0.292	0.0769785
mt-Atp8	0.274458	0.156789	0.938	0.891	0.366578
Trpc4ap	0.0287098	0.156581	0.512	0.397	0.0847849
Klhl13	0.0431905	0.15656	0.397	0.261	0.111791
Zbtb1	0.0674883	0.156504	0.313	0.167	0.149135
Fblim1	0.127768	0.156448	0.675	0.626	0.226215
Pdcd10	0.0555227	0.156344	0.675	0.521	0.133112
Acot9	0.0222579	0.156299	0.436	0.307	0.0705977
Twist1	0.0771975	0.156289	0.507	0.463	0.161684
Rpl19	0.452481	0.156253	1	1	0.505854
Cox7a2	0.346988	0.156248	0.97	0.973	0.419911
Trps1	0.0509033	0.156152	0.409	0.307	0.125162
Npc2	0.264466	0.156105	0.943	0.926	0.358685
Tra2a	0.207531	0.155924	0.884	0.868	0.309311
Pcnp	0.0752286	0.155911	0.66	0.529	0.158601
Utp3	0.115887	0.155895	0.805	0.724	0.213338
Bloc1s1	0.0296862	0.155827	0.416	0.245	0.0859759
Nelfcd	0.0299049	0.155827	0.522	0.401	0.086362
Rab26os	0.0375076	0.155827	0.379	0.214	0.101182
Mtch2	0.0665963	0.155827	0.663	0.568	0.148229
2022-03-02	0.0811345	0.155827	0.645	0.568	0.166805
Khdrbs3	0.104428	0.155702	0.296	0.171	0.198215
Rps27l	0.324495	0.155683	0.978	0.988	0.403126
Fam103a1	0.0374693	0.155539	0.589	0.498	0.101164
Usp47	0.0292389	0.155511	0.52	0.389	0.0854508
Dlat	0.0237282	0.155463	0.429	0.272	0.074086
Rnd3	0.0793445	0.155437	0.495	0.424	0.164456
Urod	0.0421378	0.155425	0.512	0.444	0.110138
Ppm1g	0.064614	0.155409	0.692	0.545	0.145504
Zfp148	0.0704292	0.155409	0.667	0.553	0.152192
Tnrc6c	0.0855907	0.155378	0.754	0.661	0.172629
Eci2	0.160064	0.15524	0.867	0.774	0.261908
Mrps18a	0.0456223	0.15519	0.64	0.521	0.115441
Meis1	0.422931	0.155119	0.897	0.856	0.480897
Mydgf	0.135137	0.155027	0.768	0.681	0.234734
Taf15	0.0707648	0.154997	0.682	0.595	0.152615
2900097C17Rik	0.0650301	0.154975	0.67	0.549	0.145622
Rce1	0.0224929	0.154901	0.456	0.315	0.0712014
Rnaseh2c	0.245532	0.154885	0.803	0.77	0.343207
Parp1	0.0396531	0.154792	0.574	0.482	0.105193
Slain2	0.0424209	0.154788	0.374	0.191	0.110696
Rrp1	0.235345	0.15472	0.899	0.829	0.333937
Lsg1	0.0262774	0.154707	0.473	0.342	0.0795545
Rnf181	0.24434	0.154645	0.241	0.089	0.341991
Phb2	0.281738	0.154634	0.953	0.922	0.372747
Efna2	0.0265785	0.154622	0.433	0.276	0.0803139
Brcc3	0.0299879	0.154622	0.429	0.272	0.0865232
Mri1	0.0416149	0.154622	0.404	0.272	0.109308
Ube2q1	0.0528564	0.154444	0.552	0.436	0.128873
Mrpl51	0.126053	0.154444	0.818	0.724	0.224924
C1qtnf6	0.029264	0.15443	0.433	0.311	0.0854508
Laptm4a	0.376443	0.154417	0.983	0.965	0.442858
Sugt1	0.158454	0.154398	0.788	0.747	0.259806
Tsen34	0.239349	0.154257	0.911	0.868	0.337519
Hist1h4i	0.1043	0.15409	0.296	0.175	0.198176
Zfp706	0.135518	0.154076	0.823	0.712	0.235114
Dexi	0.033937	0.154064	0.387	0.249	0.0945853
Tmem14c	0.17004	0.154051	0.823	0.728	0.273192
Aen	0.0296905	0.15404	0.429	0.288	0.0859759
Pkig	0.0692212	0.15404	0.675	0.553	0.150321
Rae1	0.0506046	0.154006	0.653	0.545	0.124812
Slc25a17	0.03784	0.153983	0.539	0.424	0.101649
Plekha5	0.0840399	0.153937	0.357	0.288	0.170753
Ssr1	0.132941	0.153932	0.727	0.669	0.23241
Rpl11	0.581033	0.153919	1	1	0.615937
Pias2	0.0389963	0.153897	0.369	0.23	0.103969
Prpf31	0.0441817	0.153897	0.596	0.459	0.113256
Ltbp4	0.0842149	0.153897	0.512	0.428	0.170782
Nifk	0.0357328	0.153837	0.571	0.444	0.0980502
Csnk2a2	0.0604388	0.153812	0.67	0.568	0.140088
Rbm8a	0.20036	0.153809	0.872	0.829	0.302005
Ssbp1	0.147841	0.153768	0.8	0.743	0.247876
Upf2	0.0376216	0.153766	0.574	0.467	0.101404
Capn2	0.0704533	0.153751	0.628	0.56	0.152192
Nfib	0.108941	0.153476	0.687	0.599	0.20444
Cpsf6	0.0997547	0.153471	0.697	0.615	0.191938
Ifrd1	0.0382992	0.153461	0.392	0.237	0.102796
Dnmt3a	0.06667	0.153451	0.628	0.514	0.14829
Ptpra	0.05891	0.153394	0.677	0.545	0.138317
Supt4a	0.131827	0.153358	0.825	0.743	0.231604
Lamtor5	0.101534	0.153272	0.756	0.693	0.194417
Rpl27	0.378888	0.153227	0.988	0.969	0.444914
Mpzl1	0.0648302	0.153214	0.655	0.541	0.145504
Pdzd2	0.0568004	0.153178	0.426	0.323	0.134685
Mrpl46	0.025394	0.153084	0.493	0.346	0.0776157
Ash2l	0.0586201	0.153034	0.667	0.521	0.138054
Golt1b	0.0432745	0.15302	0.372	0.23	0.11187
Pnkd	0.0728037	0.152932	0.687	0.58	0.155896
Gnl3	0.163594	0.152916	0.697	0.615	0.265914
Selenot	0.0324544	0.152782	0.461	0.346	0.0918153
Stk16	0.0704732	0.15272	0.645	0.521	0.152192
Rps19bp1	0.0463384	0.152693	0.564	0.475	0.116723
Rab7	0.0822458	0.152662	0.68	0.591	0.168177
Sumf2	0.0313147	0.152617	0.424	0.253	0.0896228
Sdf2l1	0.0334843	0.152617	0.384	0.245	0.0936932
Vps36	0.0854065	0.152533	0.643	0.553	0.172433
Mex3b	0.0345875	0.152488	0.421	0.268	0.0956472
Dhfr	0.109541	0.152488	0.273	0.171	0.205393
Ech1	0.191235	0.152457	0.805	0.755	0.292811
Hspbp1	0.0911294	0.152417	0.308	0.175	0.180002
Piezo2	0.209397	0.15222	0.283	0.195	0.310643
Pdxdc1	0.0329962	0.152202	0.485	0.37	0.0929987
Dynlt1f	0.0351687	0.152182	0.414	0.3	0.0968351
Ndufb7	0.209392	0.152167	0.919	0.856	0.310643
Sdhc	0.100412	0.152082	0.744	0.63	0.192738
Taf11	0.061537	0.151975	0.655	0.549	0.141606
Nsmce2	0.0630409	0.151975	0.643	0.506	0.143552
Gfpt1	0.0292876	0.151972	0.478	0.35	0.0854508
Pcmtd1	0.0589386	0.151936	0.399	0.288	0.138317
B9d1	0.0342143	0.151924	0.49	0.366	0.0949553
Por	0.0294201	0.151884	0.436	0.323	0.085503
Srek1	0.224473	0.151759	0.766	0.712	0.323249
Hmbs	0.0428957	0.151744	0.517	0.42	0.111643
Rab5a	0.0535336	0.151741	0.443	0.358	0.130127
Snapc5	0.044777	0.151702	0.537	0.467	0.113958
Emc8	0.0710077	0.15161	0.663	0.549	0.152932
Smim19	0.0440455	0.151551	0.448	0.35	0.113179
Rexo2	0.145357	0.151529	0.682	0.595	0.245127
Dnajc19	0.0841618	0.151483	0.704	0.588	0.170782
mt-Co2	0.285804	0.151418	0.998	1	0.375352
Snx17	0.15333	0.151363	0.744	0.673	0.254409
Smarcc1	0.33462	0.151293	0.805	0.786	0.410751
Selenop	0.125526	0.151248	0.544	0.498	0.224467
Fzd1	0.132187	0.151236	0.766	0.623	0.231944
Gorab	0.315406	0.151105	0.229	0.097	0.396332
Mageh1	0.059376	0.151083	0.576	0.455	0.139139
Ppil2	0.0502773	0.151001	0.574	0.447	0.124317
Eif2s1	0.168917	0.150971	0.828	0.732	0.271525
Arl2bp	0.106214	0.150918	0.672	0.521	0.20062
Huwe1	0.0953809	0.150821	0.672	0.553	0.185995
Acd	0.0369924	0.150745	0.397	0.257	0.1003
Ppig	0.30545	0.150736	0.911	0.872	0.388069
Rps4x	0.808983	0.150736	1	1	0.82342
Safb	0.0869944	0.150735	0.643	0.56	0.17449
Hoxc6	0.0746037	0.150712	0.576	0.471	0.158118
Rflnb	0.0438111	0.15068	0.399	0.276	0.112758
Ddx39	0.0586967	0.15064	0.584	0.475	0.138054
Metap1	0.0596475	0.150605	0.337	0.191	0.139469
Ccnl2	0.0860029	0.15049	0.665	0.591	0.173308
Eif3i	0.447531	0.150425	0.983	0.953	0.502077
Hras	0.119476	0.150398	0.724	0.626	0.21753
Etl4	0.178052	0.150398	0.626	0.549	0.280423
Gm42418	NA	0.150375	1	1	NA
Angel2	0.0292619	0.150324	0.475	0.311	0.0854508
Sh3bgrl	0.249322	0.150289	0.872	0.794	0.345299
Ddx56	0.0488218	0.150239	0.365	0.237	0.121541
Fuca1	0.0580908	0.150103	0.589	0.51	0.137235
Dnajc1	0.078775	0.150089	0.69	0.541	0.1637
Flywch2	0.210278	0.150054	0.268	0.136	0.311371
Rrm2	0.210989	0.150009	0.236	0.144	0.311872
Ctdspl	0.0431784	0.149959	0.525	0.405	0.111791
Fam114a1	0.0908669	0.149871	0.581	0.447	0.17982
Hmgcl	0.0323597	0.149857	0.478	0.319	0.0916943
Rac3	0.0409452	0.149795	0.49	0.37	0.108008
Eftud2	0.0377921	0.149781	0.48	0.401	0.101606
9130401M01Rik	0.0385222	0.149781	0.52	0.393	0.103221
Trappc5	0.0417513	0.149741	0.564	0.471	0.109486
Lsm1	0.0494409	0.149728	0.552	0.444	0.122795
Eml1	0.0953817	0.149724	0.31	0.21	0.185995
Zcchc8	0.0561602	0.149708	0.34	0.222	0.133763
Arl8b	0.0443615	0.149622	0.414	0.323	0.113573
Cep164	0.0445666	0.149552	0.495	0.374	0.113695
Crabp2	0.72018	0.149513	0.116	0.047	0.743654
Airn	0.0647613	0.149397	0.382	0.245	0.145504
Pabpc1	0.540546	0.149397	0.97	0.965	0.581902
Meaf6	0.0446022	0.14933	0.49	0.385	0.113695
Unc50	0.0437382	0.149289	0.608	0.467	0.112752
Isoc1	0.167754	0.149131	0.842	0.763	0.2702
Csad	0.0825354	0.149124	0.362	0.268	0.168662
Snrnp200	0.0445434	0.149102	0.429	0.346	0.113695
Hsd17b12	0.0493804	0.149072	0.594	0.436	0.12274
Dnajc2	0.0795261	0.149048	0.648	0.545	0.164625
Copg1	0.0751424	0.149045	0.672	0.564	0.158524
Ufm1	0.0941818	0.149045	0.648	0.568	0.184543
Ebna1bp2	0.0962114	0.149041	0.65	0.564	0.18665
Islr	0.224195	0.149039	0.626	0.576	0.323141
Setd5	0.110007	0.149029	0.704	0.626	0.205715
Tmem214	0.0444187	0.148859	0.389	0.272	0.113574
Ptgr1	0.0472023	0.148859	0.406	0.292	0.118525
Pigyl	0.0541827	0.148859	0.611	0.482	0.131224
Eif2s3y	0.074147	0.148859	0.365	0.218	0.157359
BC031181	0.0757035	0.148859	0.635	0.525	0.159286
Bcl7c	0.300844	0.148859	0.884	0.848	0.384563
Stx5a	0.0627864	0.148653	0.611	0.506	0.143345
Aph1a	0.0563826	0.148651	0.594	0.455	0.13417
Nipa2	0.0539784	0.148587	0.372	0.257	0.130909
Mkrn1	0.0883637	0.148572	0.328	0.214	0.176727
Abcf1	0.218491	0.148475	0.82	0.782	0.317712
Glyr1	0.0685056	0.148473	0.621	0.529	0.149612
Ccdc174	0.0917111	0.148458	0.599	0.514	0.180818
Mrps14	0.249184	0.148383	0.872	0.825	0.345299
Gng2	0.074776	0.148264	0.603	0.49	0.158378
Arpp19	0.24894	0.148148	0.862	0.837	0.345299
Vps29	0.160771	0.148145	0.805	0.716	0.262513
Larp1	0.0358817	0.148131	0.458	0.354	0.098154
Rbm10	0.0611326	0.148107	0.441	0.28	0.141082
Ncbp3	0.0319962	0.148094	0.448	0.315	0.0908409
Nxn	0.0734159	0.148094	0.64	0.506	0.156421
Nktr	0.296988	0.14806	0.852	0.809	0.382474
Snf8	0.128969	0.147999	0.712	0.615	0.227458
Mettl23	0.0501801	0.147984	0.547	0.44	0.124244
Commd9	0.0415674	0.147916	0.517	0.389	0.109273
Tmcc1	0.0422526	0.147837	0.431	0.288	0.110347
Fmr1	0.0456836	0.14773	0.537	0.393	0.115441
Sin3b	0.249374	0.147687	0.862	0.856	0.345299
Echs1	0.197659	0.147509	0.825	0.759	0.299041
Cycs	0.204963	0.147509	0.8	0.708	0.306917
Tmem132a	0.0954435	0.147433	0.337	0.226	0.185995
Clspn	0.247145	0.147405	0.209	0.121	0.344558
Apip	0.0600541	0.147381	0.581	0.475	0.139907
Cmc2	0.0429948	0.147367	0.436	0.346	0.111737
Thoc7	0.308107	0.147347	0.931	0.895	0.390824
Eif3f	0.565351	0.147236	0.99	0.992	0.603318
Gpx3	0.0531214	0.147234	0.367	0.245	0.12942
Lockd	0.173348	0.147142	0.278	0.156	0.275825
Bod1	0.115749	0.147102	0.702	0.588	0.213338
Apc	0.0485159	0.147085	0.409	0.315	0.120994
Tdp1	0.161748	0.147039	0.276	0.16	0.263572
CT025619.1	0.176662	0.146991	0.318	0.265	0.279112
Rps11	0.879564	0.14697	0.998	1	0.889591
Mob4	0.104667	0.146923	0.729	0.634	0.198284
Tcf19	0.433823	0.146923	0.175	0.089	0.490489
Gng5	0.54733	0.146923	0.99	0.996	0.587226
Hist1h2ae	0.0899493	0.146891	0.352	0.206	0.178611
Rangap1	0.1205	0.146887	0.318	0.202	0.218805
Nub1	0.0373187	0.146859	0.453	0.319	0.100928
Nelfe	0.0603729	0.14679	0.584	0.475	0.140088
Cyba	0.295663	0.146781	0.736	0.716	0.381867
Myg1	0.0410597	0.146775	0.52	0.377	0.108205
Akr1b3	0.0685107	0.146762	0.579	0.459	0.149612
Smarcd2	0.0447765	0.146742	0.505	0.385	0.113958
Comt	0.172447	0.146707	0.744	0.642	0.275261
Cyp7b1	0.0690764	0.146679	0.362	0.233	0.150293
2610524H06Rik	0.0732069	0.146668	0.621	0.506	0.156403
Leprot	0.0846747	0.146583	0.685	0.537	0.171436
Gon4l	0.0630735	0.146578	0.613	0.51	0.143552
Cers2	0.0598235	0.146547	0.626	0.486	0.139656
Dkk1	0.748474	0.146545	0.357	0.374	0.768937
Bag6	0.055719	0.146537	0.485	0.393	0.133209
Cct2	0.38553	0.146475	0.963	0.953	0.450232
Zfp771	0.130213	0.146399	0.722	0.689	0.229398
Mrps33	0.272599	0.146356	0.899	0.84	0.365321
Ybx3	0.51812	0.146344	0.808	0.778	0.561516
Tmem70	0.0386953	0.146302	0.441	0.323	0.103425
Ehmt2	0.0473356	0.146258	0.47	0.366	0.118673
Col6a2	0.320529	0.146238	0.825	0.724	0.399598
Ndufs7	0.313208	0.146165	0.919	0.864	0.394474
Laptm4b	0.100894	0.146159	0.623	0.553	0.19343
Hoxa9	0.109706	0.146051	0.586	0.447	0.205393
Msh2	0.0449286	0.146038	0.409	0.307	0.114166
Cenpf	0.211532	0.145989	0.298	0.198	0.312071
Macf1	0.219586	0.145912	0.736	0.642	0.31822
Kansl1	0.0512982	0.145907	0.537	0.389	0.125842
Zfp422	0.0670392	0.145895	0.581	0.463	0.148904
Gcc2	0.067891	0.145895	0.569	0.459	0.149612
Nenf	0.435361	0.145881	0.941	0.957	0.491491
Prpf38b	0.215934	0.145844	0.739	0.669	0.315361
Rnf146	0.0368866	0.145824	0.448	0.319	0.100098
Bicd2	0.0811568	0.145777	0.345	0.233	0.166805
Usp10	0.083078	0.145777	0.34	0.214	0.169445
Mcmbp	0.0517162	0.145772	0.419	0.3	0.126673
Rad21	0.0954179	0.145719	0.47	0.412	0.185995
Calm3	0.410785	0.145641	0.97	0.949	0.470896
Il6st	0.0821066	0.14563	0.542	0.447	0.168026
Ube2b	0.190673	0.145564	0.754	0.673	0.292278
Arl6ip4	0.0949198	0.145558	0.633	0.533	0.185768
Eprs	0.3345	0.145554	0.862	0.813	0.410751
Paip2	0.404752	0.145524	0.956	0.922	0.46637
Scaf1	0.0409369	0.145505	0.411	0.3	0.108008
Atp5d	0.664276	0.145462	1	0.988	0.691332
Anp32a	0.608715	0.145303	0.98	0.973	0.640816
Lima1	0.214745	0.145179	0.736	0.661	0.31423
Mrpl19	0.040951	0.145141	0.502	0.397	0.108008
Rpl30	0.996328	0.145057	1	1	0.996952
Tcea1	0.366066	0.145051	0.768	0.712	0.433685
Bax	0.343037	0.14502	0.874	0.829	0.41722
Dazap1	0.26149	0.145003	0.803	0.805	0.356917
Nfu1	0.0898255	0.144898	0.631	0.549	0.178611
Immp1l	0.113893	0.144898	0.717	0.599	0.211107
Cdc20	0.333717	0.144898	0.224	0.144	0.410433
Crip1	0.17601	0.144856	0.574	0.537	0.278558
Rb1cc1	0.0601021	0.14484	0.512	0.412	0.139917
Eml4	0.217567	0.14483	0.803	0.735	0.316734
A830082K12Rik	0.502034	0.14481	0.19	0.047	0.548767
Tead1	0.220002	0.144784	0.751	0.669	0.31839
Srsf4	0.0533667	0.14478	0.53	0.42	0.12984
Higd2a	0.164877	0.144725	0.7	0.638	0.267016
Ralbp1	0.213997	0.144704	0.768	0.735	0.313824
Sesn3	0.0625235	0.14468	0.562	0.444	0.143052
Ptrhd1	0.0827491	0.14468	0.342	0.226	0.16899
Memo1	0.0927373	0.14468	0.345	0.226	0.182055
Zfp950	0.0598587	0.144654	0.49	0.35	0.139656
Mark3	0.117783	0.144648	0.623	0.568	0.215711
Gtf2i	0.165375	0.14461	0.729	0.642	0.267172
Pcbd2	0.0956022	0.144579	0.584	0.498	0.186078
Cdk7	0.068373	0.144561	0.559	0.471	0.149612
Rad23a	0.130752	0.14452	0.315	0.191	0.229968
Ubald2	0.0521123	0.144496	0.397	0.28	0.127253
Ip6k2	0.0595131	0.14445	0.448	0.366	0.139256
Prkacb	0.0618988	0.14437	0.507	0.401	0.142234
Gins4	0.0476076	0.14424	0.569	0.436	0.119075
Ube2h	0.0703323	0.144203	0.507	0.451	0.152192
Pcbp2	0.408805	0.144121	0.924	0.887	0.469718
Cops5	0.241644	0.144049	0.842	0.778	0.339667
Bzw1	0.460643	0.144036	0.946	0.911	0.512467
Plod3	0.0547111	0.143989	0.51	0.42	0.132154
E2f4	0.061954	0.143977	0.392	0.253	0.142258
9930021J03Rik	0.0705812	0.143896	0.52	0.42	0.152322
Prorsd1	0.0682001	0.143869	0.372	0.261	0.149612
Ppfia1	0.0510579	0.143851	0.448	0.296	0.125445
Ola1	0.0911442	0.143838	0.635	0.537	0.180002
S100a16	0.166771	0.143835	0.389	0.296	0.269023
Srsf5	0.517077	0.143733	0.968	0.953	0.560796
Smarcd1	0.077642	0.143724	0.559	0.467	0.162084
Herc1	0.0682642	0.14359	0.384	0.276	0.149612
Gsdme	0.0486509	0.143497	0.389	0.276	0.12121
Nelfb	0.0558873	0.143497	0.505	0.409	0.133275
Gins2	0.0636249	0.143497	0.387	0.296	0.144319
Cdca8	0.217569	0.143497	0.266	0.198	0.316734
Rps12	0.761529	0.143497	1	1	0.780341
Tubg1	0.0629024	0.143409	0.419	0.315	0.143507
0610012G03Rik	0.26216	0.143272	0.845	0.786	0.357232
Ghitm	0.0730002	0.143269	0.547	0.428	0.156066
Sec22b	0.146765	0.143231	0.635	0.529	0.246849
Snx18	0.248299	0.143227	0.729	0.646	0.345074
Nsd1	0.245973	0.143196	0.788	0.751	0.343673
Acbd3	0.116477	0.143172	0.643	0.553	0.213878
Fat4	0.0722574	0.143109	0.362	0.23	0.154997
Gm17018	0.0648865	0.143105	0.549	0.444	0.145504
Mrps34	0.108367	0.143088	0.611	0.541	0.20372
Kifap3	0.13649	0.143031	0.626	0.572	0.236287
Rcbtb2	0.164675	0.14301	0.695	0.603	0.266992
Telo2	0.0962467	0.143003	0.328	0.241	0.18665
Akap9	0.111565	0.142996	0.559	0.444	0.207898
Nrd1	0.157733	0.142976	0.653	0.529	0.259289
Ipo9	0.0554502	0.142951	0.406	0.296	0.133064
Ccdc59	0.172283	0.14293	0.741	0.65	0.275261
Ptprf	0.148483	0.14278	0.31	0.191	0.248663
Arhgef2	0.0502875	0.142744	0.394	0.265	0.124317
Phgdh	0.178422	0.142714	0.379	0.284	0.280778
Ndufs4	0.335873	0.142688	0.892	0.802	0.411567
Ywhaz	0.383321	0.142676	0.874	0.844	0.448143
Nsmce4a	0.192624	0.142626	0.695	0.626	0.294373
Mapkap1	0.082955	0.142613	0.584	0.467	0.169302
Ndufc2	0.490687	0.142515	0.956	0.903	0.540443
Eef2	0.984231	0.142508	0.998	1	0.986083
Mrpl43	0.175809	0.142481	0.764	0.689	0.278441
Chchd2	0.950952	0.142468	0.998	1	0.955138
Szrd1	0.0429234	0.14245	0.485	0.319	0.111643
Adprh	0.208816	0.14244	0.793	0.685	0.310299
Impdh1	0.0821193	0.142404	0.345	0.218	0.168026
Pafah1b3	0.359207	0.142368	0.892	0.852	0.42826
Cotl1	0.183781	0.142344	0.692	0.607	0.285365
Col4a2	0.557349	0.142322	0.83	0.794	0.596573
Rhoq	0.053375	0.142196	0.525	0.362	0.12984
Ubqln2	0.0553503	0.142093	0.507	0.374	0.133064
Fam104a	0.282538	0.142017	0.857	0.767	0.37294
Zfp30	0.0570063	0.141987	0.493	0.339	0.135073
Zfp637	0.07933	0.141938	0.584	0.486	0.164456
Sox11	0.035363	0.141918	0.401	0.272	0.0972864
Elp2	0.0556971	0.141918	0.448	0.358	0.133209
Cuta	0.182754	0.141818	0.773	0.696	0.284184
Tk1	0.477618	0.141792	0.16	0.07	0.528224
Zfp428	0.0885233	0.141773	0.522	0.401	0.176825
Gtf2h3	0.0955424	0.141663	0.335	0.202	0.186075
Hacd2	0.254434	0.141663	0.281	0.175	0.349767
Ppm1m	0.0656566	0.141592	0.392	0.253	0.146546
Ucp2	0.221744	0.141592	0.308	0.195	0.320475
Vmp1	0.114481	0.141559	0.633	0.486	0.211728
Ncald	0.119632	0.141559	0.33	0.261	0.217599
Cope	0.388235	0.141547	0.914	0.856	0.452563
Ino80e	0.0545482	0.141529	0.443	0.331	0.13199
Zfp451	0.0600045	0.141529	0.424	0.335	0.139894
Dnm1l	0.0883538	0.141483	0.552	0.463	0.176727
Gm16152	0.497505	0.141479	0.187	0.058	0.545496
Sf3b1	0.639475	0.141472	0.953	0.942	0.668571
Snu13	0.382011	0.141466	0.884	0.868	0.447103
Csnk2b	0.273775	0.141418	0.845	0.767	0.36618
Prkra	0.165413	0.141413	0.667	0.607	0.267172
Dsel	0.219558	0.14141	0.261	0.136	0.31822
App	0.464703	0.14141	0.874	0.848	0.516085
Zcchc3	0.113266	0.141359	0.549	0.506	0.210209
Ube3a	0.284379	0.141341	0.828	0.759	0.37425
Zfp664	0.0558688	0.141333	0.5	0.37	0.133275
Rpl7	0.768091	0.141294	1	1	0.786561
Ap2m1	0.344223	0.141274	0.887	0.817	0.417588
Cct5	0.777786	0.141219	0.988	0.981	0.794197
Polr2l	0.10165	0.14102	0.35	0.214	0.194417
Sf3b3	0.213297	0.140999	0.714	0.642	0.31313
Cox8a	0.986228	0.140992	1	1	0.987774
Dmac1	0.120771	0.140852	0.719	0.588	0.219171
Cfap20	0.156646	0.14084	0.724	0.646	0.258195
Ctr9	0.0885862	0.140787	0.581	0.486	0.17684
Stoml2	0.178453	0.14065	0.734	0.634	0.280778
Prrc2c	0.466702	0.14056	0.936	0.922	0.517766
Ostf1	0.102663	0.14056	0.623	0.49	0.195999
Rai14	0.186154	0.14056	0.569	0.486	0.28807
Hp1bp3	0.260855	0.140482	0.778	0.739	0.356361
mt-Co1	0.991142	0.140379	0.998	1	0.992385
Nufip2	0.0722566	0.140326	0.547	0.444	0.154997
Bcl2	0.115007	0.140256	0.335	0.23	0.212454
Fndc5	0.162367	0.140245	0.303	0.175	0.264188
Txnip	0.0646327	0.140163	0.441	0.319	0.145504
Phactr2	0.173142	0.140135	0.594	0.514	0.275818
Col27a1	0.205111	0.140095	0.283	0.206	0.306994
Ndufb3	0.318844	0.140048	0.818	0.732	0.398431
Serping1	0.356521	0.140031	0.796	0.747	0.427329
Pls3	0.0769482	0.139933	0.51	0.436	0.161374
Cntln	0.107184	0.139921	0.569	0.502	0.201735
Usp48	0.0637731	0.139897	0.463	0.342	0.144334
Spin1	0.0850298	0.139837	0.53	0.424	0.171907
Tnrc18	0.080303	0.139817	0.515	0.381	0.165673
Ubac1	0.0654795	0.139751	0.463	0.346	0.146355
AI837181	0.0586844	0.139726	0.436	0.335	0.138054
Lats2	0.0801763	0.139672	0.384	0.28	0.165673
Cd63	0.971129	0.139599	0.998	0.996	0.973971
Dohh	0.0685108	0.139571	0.431	0.319	0.149612
Drap1	0.532628	0.139528	0.956	0.934	0.576097
Actl6a	0.164962	0.139518	0.695	0.623	0.267016
Tsfm	0.0650771	0.13951	0.475	0.346	0.145622
Gnl2	0.0636648	0.139478	0.448	0.346	0.144319
Fen1	0.240887	0.13943	0.254	0.152	0.339184
Ythdf1	0.0632665	0.139426	0.512	0.397	0.143722
Nfyc	0.0728229	0.13941	0.401	0.296	0.155896
Zkscan3	0.104074	0.13941	0.559	0.482	0.197981
Cdc34	0.0688745	0.139372	0.394	0.245	0.149956
Acvr1	0.309122	0.139344	0.246	0.113	0.391024
Msrb3	0.347562	0.139344	0.236	0.105	0.420179
Atp6v1a	0.06629	0.139323	0.419	0.327	0.14765
Cox17	0.0626307	0.139284	0.419	0.311	0.143092
Pwp1	0.0668518	0.139284	0.419	0.311	0.148591
Fxn	0.0691902	0.139284	0.392	0.307	0.150321
Dgcr6	0.18773	0.139268	0.778	0.693	0.289387
Cebpg	0.064137	0.139243	0.387	0.28	0.144875
Fam171a2	0.0647583	0.139243	0.498	0.389	0.145504
Rpl3	0.562748	0.139223	1	1	0.601344
Obsl1	0.0773389	0.139162	0.414	0.3	0.161769
Zmynd11	0.133485	0.139156	0.675	0.529	0.233015
Axin1	0.105025	0.139153	0.345	0.202	0.198608
Trim27	0.107184	0.139057	0.616	0.502	0.201735
Gna14	0.318515	0.139049	0.239	0.121	0.398419
Tmem59	0.441695	0.13903	0.919	0.903	0.496617
Stox2	0.13498	0.13902	0.33	0.21	0.23469
Gna11	0.175677	0.13902	0.695	0.623	0.278441
Prkag1	0.0749494	0.138996	0.389	0.307	0.158392
Ddah1	0.114059	0.138996	0.379	0.3	0.211191
Timm17b	0.254926	0.138982	0.818	0.767	0.350057
Ssbp2	0.234373	0.138886	0.677	0.626	0.33315
Cers5	0.0555538	0.138878	0.458	0.327	0.133112
Fat3	0.690772	0.13886	0.128	0.031	0.716584
Mrpl38	0.0958935	0.138855	0.527	0.428	0.18633
Papola	0.272519	0.1388	0.788	0.728	0.365321
Map4k4	0.308727	0.1388	0.803	0.743	0.391024
Ccna2	0.3722	0.138773	0.207	0.136	0.438836
Ipo5	0.063143	0.138706	0.448	0.331	0.143552
Wbp1	0.114229	0.138706	0.618	0.537	0.211384
Nubp1	0.0638093	0.138655	0.527	0.358	0.144334
Mapk3	0.135684	0.138484	0.571	0.529	0.235274
Col11a1	0.149419	0.138462	0.328	0.241	0.249867
Abhd17a	0.21705	0.138456	0.744	0.65	0.316412
Txndc17	0.468557	0.138448	0.931	0.879	0.51948
Mob2	0.0675637	0.138415	0.426	0.296	0.149135
Gm16286	0.177675	0.138372	0.739	0.634	0.279999
Zfp266	0.204854	0.13828	0.704	0.611	0.306908
Dcun1d5	0.311769	0.138251	0.823	0.747	0.393593
Mpdu1	0.0618142	0.138196	0.438	0.323	0.142141
Lsm7	0.297187	0.138155	0.815	0.794	0.382474
Ptk7	0.137218	0.138151	0.631	0.549	0.237168
Ddx52	0.076196	0.138063	0.461	0.374	0.160112
Tbx3	0.153038	0.138042	0.328	0.214	0.254188
Tax1bp1	0.413357	0.13798	0.884	0.825	0.472704
Pik3c2a	0.0902068	0.137933	0.382	0.261	0.178846
Gps2	0.0683384	0.13789	0.468	0.358	0.149612
Dmwd	0.0838188	0.137845	0.382	0.241	0.170412
Cald1	0.778082	0.137825	0.99	1	0.794246
Hspe1	0.7823	0.137777	0.99	0.988	0.797277
Fxyd7	0.78208	0.137693	0.106	0.019	0.797277
Clint1	0.115861	0.1376	0.505	0.409	0.213338
Tbpl1	0.0726722	0.137514	0.495	0.416	0.155782
Ormdl3	0.0646813	0.13743	0.441	0.307	0.145504
Exosc10	0.0683417	0.13743	0.426	0.3	0.149612
Hsd11b2	0.563152	0.13743	0.158	0.054	0.601575
Nsd2	0.0960511	0.137333	0.387	0.3	0.186497
Nde1	0.10886	0.137333	0.394	0.28	0.204408
Anapc1	0.0837567	0.137329	0.374	0.261	0.170395
Rabep2	0.292814	0.137312	0.251	0.117	0.380182
Yme1l1	0.12185	0.137279	0.591	0.502	0.22013
Mrpl15	0.260299	0.137255	0.766	0.704	0.355753
Rps9	0.358923	0.137173	1	1	0.42826
1110008P14Rik	0.0744668	0.137135	0.411	0.296	0.157933
Peli1	0.125478	0.137125	0.599	0.471	0.224467
Slc25a51	0.0863203	0.137121	0.377	0.257	0.173672
Dctn3	0.190795	0.137109	0.717	0.661	0.292278
Nid2	0.118903	0.137059	0.424	0.311	0.217014
Lsm4	0.627937	0.137059	0.956	0.93	0.658015
Yipf3	0.121522	0.137053	0.603	0.506	0.219786
Hoxc9	0.14908	0.136854	0.51	0.409	0.24943
Ncor1	0.389161	0.136843	0.879	0.817	0.453311
Tmem39a	0.0863467	0.13681	0.374	0.253	0.173672
Maf	0.252264	0.136682	0.268	0.16	0.348199
Ep400	0.0950331	0.136648	0.48	0.385	0.185876
Golim4	0.181764	0.136582	0.675	0.611	0.283863
Sh3bp1	0.148544	0.136545	0.315	0.195	0.248663
Cyr61	0.981581	0.136425	0.695	0.704	0.983737
Serpinf1	0.504315	0.136341	0.19	0.086	0.550883
Cep170	0.0803985	0.136324	0.399	0.28	0.165673
Specc1l	0.0911847	0.136324	0.379	0.28	0.180002
Rpl34	0.409178	0.136303	1	1	0.469775
Fam76b	0.116253	0.136269	0.357	0.226	0.213767
Top2b	0.437659	0.136252	0.877	0.767	0.493254
Thoc2	0.248089	0.13624	0.709	0.615	0.344984
Bud31	0.164187	0.136203	0.675	0.607	0.266408
Mib1	0.192977	0.13612	0.3	0.198	0.294772
Eif3e	0.779133	0.136111	0.993	0.981	0.795064
Cog4	0.0681345	0.136081	0.433	0.323	0.149612
Pou2f1	0.450532	0.13607	0.214	0.086	0.504912
Ndufc1	0.682569	0.136016	0.951	0.938	0.708753
Maoa	0.0772516	0.136004	0.429	0.342	0.161692
Pycr2	0.0884289	0.135982	0.527	0.436	0.176747
Nudt1	0.0738496	0.135938	0.421	0.292	0.156832
Aspscr1	0.0897526	0.135725	0.581	0.436	0.178611
Vezf1	0.101652	0.135664	0.571	0.455	0.194417
Tprgl	0.213054	0.135635	0.69	0.572	0.313087
Mrpl39	0.0774708	0.135635	0.411	0.292	0.161832
Cenpq	0.452097	0.135601	0.197	0.089	0.505601
[truncated: 1,199 more rows]

## Sheet: Stroma_cluster2.MutVsCTRL.DEGs
Gene	p_val	avg_logFC	pct.1	pct.2	p_val_adj
Gm10260	3.07e-52	1.37652	0.553	0	3.73e-49
Hist1h2ap	NA	0.83819	0.5	0.287	NA
Stmn1	5.51e-15	0.626727	0.969	0.848	8.94e-13
Fabp4	NA	0.617683	0.236	0.213	NA
Igfbp7	1.02e-09	0.589011	0.969	0.926	6.68e-08
Mest	1.59e-14	0.567556	0.925	0.857	2.42e-12
Basp1	1.64e-25	0.564071	0.994	0.98	5.7e-23
Uba52	8.08e-32	0.556751	0.981	0.926	4.91e-29
Apoe	4.33e-11	0.509811	0.728	0.537	4.78e-09
Itm2a	NA	0.509459	0.536	0.455	NA
Cck	1.89e-05	0.504233	0.264	0.094	0.000337438
Gm10076	2.97e-18	0.483055	0.894	0.701	6.57e-16
Sostdc1	0.00171695	0.468914	0.456	0.27	0.0122813
Hsp90b1	6.11e-11	0.468854	1	0.988	6.19e-09
Col1a1	1.44e-07	0.459503	0.997	1	5.21e-06
Rps2	6.22e-41	0.448895	1	1	5.04e-38
Pdia6	1.27e-15	0.445179	0.986	0.996	2.37e-13
Peg3	1.99e-05	0.43972	0.8	0.648	0.000350914
Nme1	1.54e-11	0.434632	0.908	0.746	1.79e-09
Ppp1r14b	4.23e-13	0.43346	0.933	0.861	5.42e-11
Nnat	5.86e-09	0.432447	0.742	0.504	3.03e-07
Col1a2	2.9e-10	0.430411	0.997	1	2.35e-08
Tmsb10	6.36e-22	0.42506	1	1	1.55e-19
Lum	0.00920662	0.42261	0.442	0.311	0.04425
Pebp1	6.16e-22	0.416712	0.992	0.988	1.55e-19
Col14a1	4.49e-05	0.416432	0.703	0.582	0.000704216
Bzw2	2.45e-08	0.405425	0.889	0.754	9.92e-07
Cox5b	9.79e-13	0.404725	0.95	0.91	1.19e-10
Tpm3-rs7	8.42e-10	0.396752	0.422	0.07	5.69e-08
Thy1	5.09e-08	0.389813	0.6	0.422	1.96e-06
Dcn	0.0238948	0.389145	0.786	0.746	0.0868845
Fn1	2.4e-08	0.388125	0.994	0.984	9.9e-07
H2afy	3.67e-10	0.386618	0.911	0.865	2.88e-08
Ostc	1.98e-10	0.38618	0.964	0.865	1.66e-08
Tubb5	1.3e-10	0.382219	1	1	1.18e-08
Fkbp1a	1.16e-10	0.380175	0.975	0.926	1.09e-08
Hspa8	7.59e-10	0.376883	0.994	0.996	5.28e-08
Rbp1	5.24e-09	0.374441	0.975	0.951	2.77e-07
Fabp5	0.00739649	0.371609	0.533	0.471	0.0377112
Raly	7.44e-10	0.371242	0.911	0.836	5.28e-08
S100a6	1.42e-05	0.367854	0.928	0.869	0.000270349
Ppia	1.31e-13	0.364797	0.997	0.996	1.76e-11
Ranbp1	1.46e-07	0.363109	0.892	0.82	5.22e-06
Ran	7.08e-07	0.361604	0.961	0.947	2.1e-05
Cxcl13	0.0806803	0.361463	0.103	0.07	0.197797
Sec61b	1.6e-08	0.361219	0.978	0.955	7.09e-07
Alcam	4.73e-05	0.361207	0.931	0.852	0.000737832
Pfn1	3.54e-09	0.355765	0.994	0.984	2e-07
Agtr2	0.000103701	0.353604	0.339	0.18	0.00138572
Col3a1	3.31e-07	0.352711	1	1	1.09e-05
Postn	0.0742153	0.351645	0.325	0.336	0.18634
Erh	1.41e-08	0.347307	0.939	0.82	6.49e-07
Gpc3	7.47e-05	0.343724	0.989	0.98	0.00105629
Rasgrp2	2.55e-06	0.342864	0.803	0.717	6.59e-05
Arf5	6.87e-11	0.342604	0.989	0.992	6.69e-09
Serpinh1	6.13e-09	0.341904	0.994	0.996	3.04e-07
Slc25a5	1.85e-05	0.340579	0.822	0.713	0.000337438
Sec61g	2.49e-09	0.338113	0.992	0.984	1.51e-07
Eif3j1	4.46e-08	0.338036	0.722	0.504	1.75e-06
Srsf2	7.48e-07	0.337437	0.917	0.848	2.17e-05
Dlk1	0.00454795	0.337218	0.292	0.143	0.0257224
Ndufa4	3.23e-09	0.336913	0.986	0.963	1.87e-07
Cfl1	3.68e-09	0.334792	0.997	1	2.02e-07
Cryab	0.000426896	0.332952	0.508	0.32	0.00411989
Ywhaq	3.85e-08	0.332145	0.969	0.963	1.53e-06
Ybx1	6.12e-09	0.332032	0.997	0.996	3.04e-07
Tubb4b	0.000752676	0.331275	0.753	0.602	0.00649116
Ciapin1	2.31e-09	0.330338	0.581	0.311	1.44e-07
Tuba1a	5.88e-05	0.326776	0.983	0.971	0.000877737
Atp5k	7.84e-09	0.32659	0.989	0.971	3.81e-07
Fth1	2.2e-08	0.326372	1	1	9.38e-07
Crip1	0.000203318	0.32619	0.564	0.389	0.00240033
Snrpg	3.53e-07	0.324749	0.919	0.824	1.13e-05
mt-Cytb	4.39e-10	0.324704	1	1	3.23e-08
Calr	3.3e-05	0.321902	0.992	0.971	0.000545989
Pclaf	0.00262385	0.321854	0.308	0.18	0.017224
Maged2	1.95e-07	0.321674	0.994	0.988	6.68e-06
Mpp6	1.2e-05	0.321306	0.714	0.52	0.000235595
Wdfy1	6.38e-08	0.321075	0.433	0.193	2.42e-06
Tma7	7.83e-07	0.319144	0.936	0.889	2.24e-05
Eif5a	1.67e-06	0.317515	0.989	0.975	4.48e-05
Oaf	3.3e-06	0.315855	0.811	0.652	7.87e-05
Calm1	7.13e-06	0.315652	0.997	0.996	0.000154959
Txndc5	1.17e-06	0.315108	0.781	0.594	3.23e-05
Dbi	5.84e-06	0.313576	0.892	0.783	0.000131464
Snrpf	1.57e-06	0.311567	0.922	0.807	4.24e-05
Prdx1	2.85e-06	0.311074	0.969	0.951	7.12e-05
Arpc2	7.11e-06	0.310805	0.953	0.893	0.000154959
Pdlim2	6.07e-05	0.308835	0.925	0.914	0.000899633
Romo1	2.34e-06	0.306454	0.956	0.91	6.18e-05
H2afv	5.1e-05	0.306311	0.983	0.98	0.000790451
Ppa1	7.44e-07	0.305562	0.553	0.369	2.17e-05
Cdk4	8.89e-06	0.305391	0.975	0.971	0.000185617
Manf	0.000165739	0.305012	0.833	0.684	0.00200536
Gng2	0.00108155	0.304211	0.694	0.627	0.0086524
Rbm3	7.2e-06	0.303223	0.983	0.971	0.000154959
Ogfrl1	0.000372255	0.30243	0.736	0.619	0.00371034
Rpn2	1.66e-05	0.302368	0.797	0.611	0.000310724
Snrpb	3.29e-06	0.301615	0.947	0.914	7.87e-05
Sfr1	2.67e-06	0.300971	0.972	0.914	6.83e-05
Mcm3	7.29e-05	0.30097	0.386	0.189	0.00104286
Tcf12	3.88e-05	0.30029	0.739	0.566	0.000624257
Sf3b5	2.96e-06	0.299979	0.867	0.734	7.28e-05
Cdkn1c	0.221686	0.299542	0.994	0.988	0.361355
Tagln2	0.000372019	0.298606	0.894	0.779	0.00371034
Pdia3	5.88e-05	0.298432	0.969	0.951	0.000877737
Atp5e	7.55e-08	0.297645	0.992	0.992	2.78e-06
Tsn	8.93e-06	0.296831	0.881	0.77	0.000185617
Mmp2	1.86e-05	0.296534	0.781	0.627	0.000337438
Elob	4.46e-06	0.295146	0.986	0.992	0.000101295
Rex1bd	3.62e-06	0.29489	0.758	0.602	8.47e-05
Copz2	8.57e-06	0.29427	0.794	0.693	0.000182872
Col5a2	2.88e-05	0.294098	0.861	0.713	0.000485689
Sfpq	6.65e-05	0.292727	0.897	0.832	0.000968205
Slc9a3r2	1.12e-05	0.292339	0.692	0.557	0.000223499
Pkdcc	0.000407677	0.292203	0.917	0.902	0.00399787
Gnas	8.87e-07	0.291673	1	1	2.51e-05
Rtn4	1.22e-05	0.291668	0.975	0.947	0.000237296
Mfge8	0.000133107	0.289998	0.708	0.582	0.00171279
Gipc1	2.51e-05	0.289959	0.769	0.639	0.000433569
Hspb1	0.00250859	0.289793	0.561	0.398	0.0166585
Nfat5	NA	0.289455	0.844	0.857	NA
Efnb1	2.33e-05	0.289333	0.711	0.619	0.0004045
Tubb2b	0.00125022	0.289076	0.581	0.426	0.00968325
Nudc	2.78e-05	0.288418	0.892	0.803	0.000473378
Taldo1	1.89e-05	0.288237	0.861	0.787	0.000337438
Atp5g1	7.33e-05	0.287839	0.975	0.934	0.00104286
Col26a1	3.1e-06	0.287534	0.631	0.447	7.54e-05
Nasp	0.000124565	0.287031	0.692	0.607	0.0016114
Rhoc	0.000361935	0.28697	0.875	0.791	0.00366761
Anxa6	7.25e-05	0.286553	0.931	0.898	0.00104286
Ubb	3.73e-09	0.285423	1	0.996	2.02e-07
Prdx2	1.17e-06	0.285308	0.989	0.988	3.23e-05
Dnaja1	0.000138296	0.285115	0.978	0.963	0.00177019
Nr2f1	4.25e-05	0.284893	0.544	0.41	0.000675146
Uqcr11	4.42e-05	0.28392	0.933	0.906	0.000697562
Hmgn2	0.000161567	0.283821	0.944	0.91	0.00196466
Sh3bgrl3	0.000220019	0.282894	0.892	0.832	0.00252399
Lgals1	0.000366816	0.281584	1	1	0.00370164
Snrpd1	0.000105137	0.280752	0.936	0.881	0.00139723
Psmb2	3.92e-05	0.28055	0.897	0.803	0.000627399
Bgn	0.000205171	0.280521	0.992	0.98	0.00240788
Stip1	2.87e-06	0.280306	0.619	0.426	7.12e-05
Akr1a1	3.08e-05	0.279392	0.964	0.934	0.000516366
Rpl7l1	1.59e-05	0.279278	0.719	0.566	0.000300007
Mrfap1	2.15e-05	0.279263	0.978	0.971	0.000375968
Tril	0.000317712	0.27922	0.825	0.73	0.00330204
Morf4l2	7.78e-05	0.278054	0.906	0.82	0.00109397
Ssr2	0.000141231	0.278	0.947	0.922	0.00178892
Slbp	8.66e-06	0.277614	0.597	0.393	0.000183106
Enpep	0.000244463	0.276978	0.406	0.242	0.00273978
Hmgb1	0.000827405	0.275943	0.997	0.996	0.00699862
Nedd8	5.53e-05	0.275691	0.981	0.963	0.000839843
Anxa5	0.00033563	0.275456	0.958	0.885	0.0034587
Srsf3	0.000310335	0.274656	0.983	0.967	0.00325245
Dnajc3	5.48e-05	0.273614	0.689	0.504	0.000839843
Bok	0.000714331	0.27344	0.883	0.791	0.00622671
Tmed9	0.000154543	0.272878	0.972	0.922	0.00191332
Anxa2	0.00062534	0.272094	0.978	0.975	0.00561191
Oaz1	3.62e-06	0.272	0.992	1	8.47e-05
Maged1	0.000275904	0.271943	0.961	0.934	0.00299553
Rpl35	4.3e-10	0.271035	1	1	3.23e-08
Hmgn1	1.74e-05	0.270601	0.997	1	0.000322156
Txn1	0.000383922	0.270095	0.969	0.955	0.00379552
Reep5	0.000450862	0.270074	0.875	0.803	0.00428239
Tmem234	0.000120295	0.269147	0.844	0.754	0.00157289
Psmb4	0.000115104	0.268856	0.939	0.881	0.00151315
D8Ertd738e	0.000154093	0.268314	0.894	0.828	0.00191332
Gstp1	1.37e-05	0.268246	0.558	0.385	0.000263237
Psma7	0.00208744	0.267415	0.933	0.914	0.0143409
Gap43	0.359278	0.267328	0.147	0.127	0.471316
Kdelr2	0.000195658	0.26717	0.808	0.68	0.00232117
Atp5j2	0.00016118	0.267005	0.983	0.967	0.00196466
Prdx6	0.000268922	0.266673	0.856	0.734	0.00296061
1500009L16Rik	6.12e-05	0.266376	0.583	0.455	0.000902659
Ewsr1	0.000205937	0.265812	0.828	0.734	0.00240788
Ptch1	0.000964203	0.265408	0.778	0.693	0.00781648
Psma4	0.000140249	0.264991	0.95	0.881	0.00178579
Gpx4	0.000153051	0.264924	0.983	0.959	0.00191332
Rps21	5.62e-11	0.264457	1	1	5.95e-09
Selenom	0.000868419	0.264394	0.975	0.955	0.00716678
Nucks1	0.00258726	0.264301	0.864	0.803	0.0170521
Rpl27	0.000154985	0.264235	0.961	0.918	0.00191332
Ptms	0.000270884	0.264075	1	0.996	0.00296753
Hspa5	0.0121171	0.263808	0.989	0.951	0.0534824
Psmb6	0.000294427	0.263782	0.964	0.885	0.00314055
Trim35	0.000296007	0.262826	0.772	0.668	0.00314362
Itm2c	0.000568015	0.262364	0.831	0.758	0.0052192
Psmb3	0.000371685	0.262129	0.875	0.799	0.00371034
Hnrnpa3	0.00170069	0.261902	0.983	0.939	0.0122733
Mxd4	0.000988042	0.261852	0.928	0.84	0.00795668
Tuba1b	0.00418051	0.261194	0.947	0.873	0.0242514
Hdlbp	0.000416641	0.261136	0.889	0.816	0.00403694
Ndufa5	0.000320055	0.26101	0.908	0.828	0.00331223
Oxct1	0.000571871	0.260861	0.886	0.754	0.0052192
Snrpd3	0.000304805	0.260676	0.858	0.758	0.00320903
Srp9	0.000287394	0.26053	0.9	0.84	0.00307904
Stub1	0.000590079	0.260127	0.878	0.857	0.00535475
Atp1b3	6.49e-05	0.259876	0.592	0.418	0.000950613
H2afx	0.00834377	0.259876	0.506	0.434	0.0407483
Cdh11	0.000887879	0.259052	0.986	0.992	0.00724604
Ndn	0.00063823	0.258688	0.783	0.643	0.00566487
Ift20	0.000611636	0.25794	0.833	0.693	0.00550925
Nhp2	2.61e-05	0.257567	0.628	0.414	0.000446647
Ccnd1	0.183114	0.257482	0.692	0.635	0.322705
Enho	0.000226477	0.257243	0.644	0.496	0.0025738
mt-Nd4	1.8e-05	0.25648	1	1	0.000330999
Nsg1	3.68e-05	0.256298	0.492	0.32	0.000600393
U2af1	0.000571465	0.255131	0.892	0.816	0.0052192
Magt1	0.000247041	0.254691	0.667	0.512	0.00275598
Ruvbl1	0.000272358	0.253813	0.772	0.68	0.00297029
Erp29	0.0020347	0.253808	0.944	0.926	0.014098
Arcn1	8.74e-05	0.253781	0.669	0.508	0.00120812
Cct3	0.000414296	0.253446	0.925	0.857	0.00403694
Nisch	0.000636613	0.252918	0.931	0.893	0.00566487
Nt5dc2	0.000539057	0.252726	0.772	0.635	0.00498474
Col23a1	0.0112812	0.252662	0.692	0.672	0.0508491
2022-09-11	0.00271454	0.252524	0.972	0.922	0.0176991
Ywhab	0.000975928	0.251792	0.933	0.852	0.00788524
mt-Nd1	0.000392087	0.251777	1	1	0.00386055
Ddost	0.000595229	0.251735	0.939	0.889	0.0053814
Col9a2	0.00531265	0.251441	0.322	0.197	0.0287759
Anapc5	0.000735037	0.251401	0.883	0.816	0.00638432
6030408B16Rik	0.000519238	0.251386	0.636	0.492	0.00487562
Ccdc85b	6.78e-05	0.2512	0.556	0.373	0.000980871
Ptprd	0.000431747	0.251187	0.628	0.48	0.00415023
Fkbp8	0.000529526	0.250534	0.883	0.73	0.00493413
Acp1	0.000832549	0.250338	0.811	0.668	0.00699862
Psmd8	0.000814788	0.249929	0.9	0.848	0.00692855
Eif1	9.79e-05	0.249794	1	1	0.00132263
Serf2	0.00034277	0.249599	1	0.996	0.00348794
Lrrc59	7.89e-05	0.249553	0.575	0.41	0.0011027
Ssr4	0.00133017	0.249521	0.872	0.844	0.010141
Srsf10	0.000311604	0.249444	0.75	0.652	0.00325245
Atp5j	0.00161389	0.24896	0.983	0.971	0.0118429
Tubb2a	0.00506165	0.248703	0.622	0.459	0.0276627
Cnih1	9.37e-05	0.248217	0.656	0.434	0.00128438
Uqcrq	0.00122007	0.248161	0.878	0.811	0.00957164
Emcn	0.00988795	0.247875	0.531	0.377	0.0463343
Crip2	0.0049491	0.247378	0.406	0.295	0.0274173
Psip1	0.00329049	0.247328	0.836	0.738	0.0206249
Smarca4	0.000142973	0.246901	0.567	0.41	0.0018016
Gpx7	0.00142	0.246606	0.75	0.627	0.0106917
Ccnd2	0.171247	0.246183	0.919	0.906	0.308955
Arpc1b	0.00479197	0.24614	0.872	0.754	0.0267909
Pmp22	0.00309704	0.246088	0.719	0.656	0.0196392
Ap1s1	0.000341007	0.245942	0.722	0.582	0.00348794
Arl1	0.0010871	0.245742	0.931	0.885	0.00866832
Spcs2	0.0024392	0.245276	0.944	0.893	0.0164782
Ccdc102a	9.43e-05	0.2451	0.636	0.434	0.00128438
Il11ra1	0.00135074	0.245035	0.708	0.52	0.0102656
Pomp	0.00215822	0.244764	0.933	0.885	0.0147438
Ube2n	0.00128982	0.244755	0.825	0.787	0.00995822
Ptov1	0.00192088	0.244323	0.981	0.955	0.0135017
Anp32b	0.00498383	0.244289	0.972	0.975	0.027547
Prmt1	0.00200859	0.244152	0.942	0.918	0.0139568
Snai2	0.0254439	0.243993	0.756	0.676	0.0912678
Khdrbs3	0.000851958	0.243718	0.661	0.52	0.00712015
Top2a	0.0553681	0.243482	0.267	0.164	0.153888
Canx	0.00230089	0.243175	0.861	0.762	0.0155871
Mdk	0.00401208	0.242939	0.992	0.996	0.0238566
Atpif1	0.00152395	0.242818	0.994	0.992	0.0112798
Slc25a4	0.000415038	0.242756	0.997	0.988	0.00403694
Lmnb1	0.00194355	0.241441	0.625	0.504	0.0136217
Cox6b1	0.00166527	0.241327	0.981	0.947	0.0121276
Cuedc1	0.000159677	0.241032	0.6	0.451	0.00196128
Alyref	0.000381647	0.240698	0.708	0.582	0.00378843
Cct8	0.00123953	0.240665	0.961	0.918	0.00963112
Ilf2	0.000758258	0.240572	0.769	0.664	0.0065162
Selenow	0.0053006	0.240315	0.986	0.984	0.0287747
Selenok	0.00363271	0.240204	0.942	0.885	0.0221708
Hdac1	0.000452539	0.239954	0.736	0.574	0.00428239
Ppp1ca	0.00381971	0.239732	0.961	0.939	0.0230766
Ctbp2	0.00156361	0.239673	0.719	0.615	0.0115233
Tshz2	0.0191573	0.239547	0.917	0.848	0.0733781
Atxn7l3b	0.00152593	0.239187	0.986	0.971	0.0112798
Pcbp1	0.00282841	0.23894	0.942	0.898	0.0183064
Sptssa	0.00190166	0.238657	0.797	0.705	0.0134053
Ctdspl	0.000192122	0.238614	0.561	0.398	0.00230167
Ptma	0.00393849	0.238419	1	1	0.0235875
Capns1	0.00228898	0.238253	0.947	0.906	0.0155498
P4hb	0.00730732	0.238238	0.886	0.811	0.0375717
Hint1	0.00129789	0.238136	0.989	0.984	0.00998882
H2afz	0.151105	0.237764	0.989	0.996	0.287774
Vstm4	0.00325686	0.237659	0.7	0.635	0.0205199
Rpl37	3.41e-07	0.237512	1	1	1.11e-05
Fam32a	0.000858412	0.237045	0.783	0.631	0.00714951
2610524H06Rik	0.000121852	0.236389	0.561	0.385	0.00158473
Aes	0.0100333	0.236199	0.819	0.762	0.0467454
Rhoa	0.002136	0.235956	0.978	0.918	0.0146331
Vcp	0.00378431	0.235851	0.969	0.971	0.0230086
Eif1b	0.00205596	0.2356	0.856	0.811	0.0142049
Hnrnpm	0.00505665	0.23546	0.933	0.914	0.0276627
Ssrp1	0.00403415	0.235277	0.797	0.709	0.0238971
Smdt1	0.00502735	0.23514	0.922	0.893	0.0276618
Minos1	0.00436617	0.235117	0.872	0.811	0.024951
Tmem258	0.00632748	0.234775	0.928	0.91	0.0332364
Eif2s3y	0.00692956	0.234714	0.303	0.123	0.03601
Rpl36	7.15e-06	0.234497	1	1	0.000154959
Oat	0.00632487	0.234453	0.811	0.738	0.0332364
S100a16	0.0193004	0.234207	0.328	0.217	0.0735459
Rbm42	0.000283514	0.23403	0.583	0.439	0.00306447
Mat2a	0.00140236	0.233853	0.667	0.582	0.0105917
Hsd11b2	0.00088413	0.233748	0.403	0.193	0.00723974
Efemp2	0.00533874	0.233705	0.928	0.848	0.0288529
Mrpl52	0.00300253	0.233681	0.917	0.852	0.0192669
Dnm3os	0.00131853	0.23366	0.467	0.377	0.0101156
Ndufa11	0.00354632	0.233594	0.894	0.861	0.0217794
Col5a1	0.00538568	0.233418	0.753	0.652	0.0289778
Dynll1	0.0188857	0.233221	1	0.992	0.0726742
Ndufb8	0.00463707	0.233157	0.953	0.91	0.026105
Zfp503	0.0113943	0.231982	0.881	0.791	0.0512219
Isyna1	0.002646	0.231862	0.564	0.496	0.0172986
Prelid1	0.00603615	0.231817	0.922	0.861	0.0321928
Sgta	0.000669244	0.231617	0.728	0.582	0.00589428
Mbd3	0.00218182	0.231152	0.869	0.779	0.0148633
Tmbim6	0.00689012	0.230972	0.9	0.795	0.0358818
Golgb1	0.00161671	0.230839	0.775	0.652	0.0118429
Akt1	0.00171602	0.23081	0.828	0.652	0.0122813
Cdv3	0.0030547	0.230767	0.806	0.648	0.0194988
Col4a2	0.0331446	0.230388	0.983	0.934	0.108782
1110065P20Rik	0.00139315	0.230265	0.711	0.598	0.010555
Rac1	0.00437054	0.229866	0.828	0.787	0.024951
2010107E04Rik	0.00405066	0.229834	0.961	0.877	0.0238971
Selenoh	0.0254917	0.229363	0.811	0.697	0.0913044
Tia1	0.00305183	0.229319	0.831	0.713	0.0194988
Cks1b	0.00505416	0.229121	0.642	0.578	0.0276627
Pdgfra	0.0239361	0.228919	0.906	0.824	0.0868845
Ywhah	0.00421059	0.228601	0.861	0.766	0.0242694
Sec22b	0.000741905	0.227996	0.6	0.434	0.00642105
Ralgps2	0.00104798	0.227984	0.625	0.529	0.00841152
Tipin	0.0014274	0.227838	0.428	0.299	0.0107143
Prdx4	0.0283795	0.227463	0.903	0.807	0.0988811
Tceal8	0.00246342	0.227319	0.825	0.664	0.0165499
Tceal9	0.00838795	0.226952	0.986	0.975	0.0408808
Hnrnpab	0.0160598	0.226825	0.889	0.816	0.0650956
Atp5g2	0.00481956	0.226735	0.992	0.996	0.0268219
S100a10	0.0201807	0.22658	0.981	0.967	0.0758571
Lman1	0.00433372	0.226403	0.881	0.791	0.0248576
Fscn1	0.004068	0.226355	0.736	0.66	0.0238971
Ndufa2	0.00487733	0.226353	0.961	0.926	0.0270814
Hnrnpd	0.0162678	0.22574	0.967	0.926	0.0658291
Cd81	0.00577173	0.225443	0.994	0.996	0.0308502
Srsf6	0.00408931	0.22543	0.792	0.689	0.0239068
Hsp90aa1	0.0385615	0.225419	0.964	0.939	0.120387
Rtf1	0.00519481	0.225338	0.878	0.844	0.0282635
Cox5a	0.0185727	0.225011	0.917	0.914	0.0720754
Cited2	0.00774864	0.224814	0.497	0.467	0.038855
Ddx5	0.00408092	0.224691	0.997	0.955	0.0239068
Gadd45gip1	0.000446992	0.224382	0.636	0.443	0.00426308
Phb	0.00113893	0.224368	0.606	0.52	0.00905187
Cdc26	0.00251384	0.223931	0.792	0.68	0.0166585
Fxyd7	0.00335683	0.223817	0.425	0.262	0.0208287
Uba1	0.00168109	0.223563	0.619	0.443	0.0121679
Hnrnpf	0.00811839	0.223557	0.981	0.947	0.0402937
Igfbp5	0.696833	0.223556	0.439	0.455	0.745906
Ndufa1	0.00460163	0.223553	0.767	0.676	0.0259656
Srsf7	0.00771376	0.223223	0.817	0.705	0.0387601
Mcrip1	0.00816771	0.223205	0.858	0.82	0.0403977
Cbx1	0.0112789	0.223032	0.947	0.906	0.0508491
Dek	0.113034	0.222822	0.831	0.82	0.245885
Gtf2a2	0.00173984	0.222758	0.719	0.582	0.0124085
Ctnnbip1	0.00197946	0.222718	0.717	0.59	0.0138335
Oaz2	0.00166554	0.222364	0.653	0.541	0.0121276
Nectin3	0.00353419	0.222348	0.675	0.574	0.0217599
Ufc1	0.00513515	0.222076	0.778	0.684	0.0280015
Ddx39b	0.0110224	0.221942	0.947	0.922	0.0502937
Rrbp1	0.0193102	0.221568	0.986	0.947	0.0735459
Lasp1	0.000634411	0.22095	0.533	0.361	0.00566487
Uqcr10	0.0115429	0.220607	0.922	0.889	0.0516038
Phf5a	0.00410455	0.220549	0.794	0.693	0.0239383
Uqcc2	0.0074776	0.220374	0.886	0.795	0.0378865
Eif4h	0.00652668	0.220183	0.847	0.787	0.0342088
Hmbs	0.000834539	0.220073	0.422	0.23	0.00699862
Arl3	0.00433372	0.219912	0.8	0.725	0.0248576
Ldb2	0.015497	0.219894	0.853	0.738	0.0636492
Limd2	0.00245926	0.219685	0.711	0.582	0.0165499
Uba5	0.000794503	0.219505	0.589	0.471	0.00677976
Krtcap2	0.0199742	0.219005	0.939	0.898	0.0751971
Rpl37a	1.19e-05	0.218844	1	1	0.000235595
Ywhae	0.0172506	0.218778	0.997	1	0.0682522
Dad1	0.0206782	0.218737	0.975	0.955	0.0771309
Tbcb	0.00760052	0.218704	0.8	0.705	0.0382701
Upf3b	0.00255987	0.218649	0.647	0.516	0.0169174
Ehd1	0.000572996	0.218329	0.453	0.275	0.0052192
Gnb1	0.00817885	0.218318	0.856	0.795	0.0403977
Ndufa3	0.00969856	0.218219	0.925	0.873	0.0458513
Rpl39	5.56e-05	0.218157	1	1	0.000839843
Mdh1	0.0155197	0.217888	0.914	0.836	0.0636492
Usp46	0.000922297	0.217711	0.511	0.316	0.00750176
Nav3	0.0230066	0.217643	0.706	0.545	0.084776
Srpr	0.00293868	0.217597	0.7	0.557	0.0189572
H3f3a	0.000790641	0.217595	1	1	0.00677056
Svbp	0.00734814	0.217343	0.828	0.758	0.0376974
1110008F13Rik	0.0039201	0.217019	0.717	0.631	0.02354
Ndufv1	0.00418815	0.217019	0.714	0.643	0.0242514
Paip2	0.00927077	0.216988	0.922	0.865	0.0444704
Tmsb4x	0.0551992	0.216804	1	1	0.153888
Psmb5	0.0128176	0.216797	0.942	0.885	0.055665
Txnl1	0.00979099	0.216416	0.875	0.754	0.0461452
Cox7c	0.0169158	0.216034	0.989	0.984	0.0673309
Tcp1	0.0101197	0.215975	0.906	0.852	0.0469679
Gnai2	0.0556199	0.215919	0.978	0.971	0.153888
Sfrp1	0.0524047	0.215658	0.989	0.971	0.149412
Sub1	0.0121041	0.215643	0.997	0.996	0.0534824
Sumo2	0.0100041	0.215623	0.992	0.984	0.0467199
Grb10	0.0122219	0.215496	0.911	0.84	0.0537499
Atp5o.1	0.023423	0.215273	0.975	0.971	0.0856613
Igfbp3	0.0324119	0.215232	0.286	0.23	0.106709
Mrpl13	0.00348559	0.214953	0.731	0.578	0.0215151
1810058I24Rik	0.0169804	0.214917	0.925	0.873	0.0673675
Nr2f2	0.0438722	0.214813	0.997	0.971	0.131078
Mrps18c	0.000864622	0.214515	0.533	0.393	0.00716678
Son	0.0103967	0.214505	0.989	0.98	0.0478881
Chd3	0.0572225	0.21404	0.925	0.889	0.156678
Hoxd11	0.0138188	0.213988	0.967	0.906	0.0587542
Hoxc10	0.0086947	0.213933	0.639	0.496	0.0419554
Nap1l1	0.0390189	0.213863	0.969	0.947	0.120884
Fkbp3	0.0303779	0.213409	0.883	0.885	0.102896
Ecscr	0.021211	0.213382	0.378	0.275	0.0788763
Sox4	0.0290563	0.21333	0.975	0.959	0.100519
Cdc42	0.0203601	0.213285	0.983	0.98	0.0762955
Map2k2	0.00828596	0.213279	0.811	0.758	0.04071
Strap	0.00443434	0.213194	0.747	0.631	0.025256
Smim7	0.00500459	0.213143	0.733	0.615	0.027599
Kdelr3	0.00421121	0.213086	0.672	0.533	0.0242694
H2afj	0.00669616	0.213012	0.731	0.619	0.0349465
Hist1h2ae	0.0921137	0.21292	0.258	0.184	0.214991
Pycrl	0.000872919	0.212604	0.478	0.332	0.00717209
mt-Co3	0.000286458	0.212087	1	1	0.00307904
Idh2	0.0387168	0.211978	0.944	0.955	0.120717
Ubl5	0.0153312	0.211921	0.9	0.848	0.0631491
2022-09-07	0.0406733	0.211778	0.989	0.971	0.124896
Esd	0.0174023	0.211529	0.983	0.934	0.0685939
Cct5	0.0191003	0.211497	0.975	0.926	0.0733781
Selenof	0.0198306	0.211464	0.981	0.939	0.0747721
Cox4i1	0.013642	0.211449	0.997	0.996	0.0582057
Atp5h	0.0169503	0.211267	0.989	0.984	0.067358
Sec61a1	0.00180127	0.211029	0.6	0.467	0.0127592
Ccar1	0.0146178	0.210719	0.783	0.713	0.0611885
Tspan3	0.0163162	0.210646	0.947	0.889	0.0659153
Rpsa	0.0193925	0.210599	1	1	0.0736916
Ccdc88a	0.0115217	0.210407	0.786	0.66	0.0516035
Atox1	0.0152129	0.210285	0.853	0.791	0.0631363
Rpl38	0.00310093	0.210003	1	1	0.0196392
Rps27	0.000535057	0.209823	1	1	0.00496664
Dhx30	0.00121208	0.209595	0.533	0.373	0.00953974
Wdr6	0.00175402	0.209555	0.55	0.398	0.0124731
Psma3	0.0319158	0.209438	0.972	0.947	0.105748
Bex3	0.026705	0.209361	0.961	0.951	0.0945366
Sf3b6	0.0112438	0.209063	0.85	0.783	0.0508491
Hic1	0.0119258	0.209001	0.725	0.611	0.053023
Mtch1	0.0389185	0.208768	0.969	0.91	0.120727
Ncbp2	0.00358572	0.208673	0.661	0.496	0.0219659
Selenos	0.0233408	0.208659	0.803	0.66	0.0856181
Prpsap1	0.00180475	0.208641	0.55	0.414	0.0127592
Dhrs4	0.00332605	0.208555	0.644	0.512	0.0207942
Fnta	0.00467903	0.208466	0.694	0.582	0.0262804
Zranb2	0.00846752	0.20842	0.839	0.746	0.0411097
Psmc4	0.0121535	0.208393	0.803	0.734	0.053546
Nrbp1	0.00736277	0.208263	0.669	0.557	0.0376974
Dctpp1	0.00167865	0.207942	0.514	0.357	0.0121679
Fbln5	0.131429	0.207802	0.778	0.758	0.265936
Cycs	0.0166112	0.207764	0.644	0.607	0.0665541
Gpx1	0.0516209	0.2076	0.919	0.832	0.147523
Apbb2	0.00132385	0.207585	0.469	0.307	0.0101245
Smc6	0.0188722	0.207509	0.794	0.648	0.0726742
Ckb	0.119318	0.207424	0.853	0.791	0.253424
Papss1	0.0080909	0.207328	0.739	0.643	0.0402937
Bcap31	0.00970947	0.207194	0.775	0.701	0.0458513
Ppib	0.0295051	0.206965	0.994	1	0.1013
Ndufab1	0.0175794	0.206933	0.894	0.811	0.0690019
Pdcd4	0.0261139	0.206807	0.931	0.865	0.0931218
Ssu72	0.00711221	0.206725	0.756	0.627	0.0368019
Hspe1	0.0584456	0.206686	0.972	0.967	0.158815
Rnf7	0.0153459	0.206573	0.9	0.795	0.0631491
Hmgcs1	0.0119745	0.206414	0.369	0.254	0.0531425
Dtymk	0.00738072	0.206356	0.678	0.578	0.0377099
Arap1	0.0056751	0.206266	0.594	0.48	0.0304677
Anapc13	0.0140977	0.206244	0.783	0.754	0.0594204
Rnf10	0.00406786	0.205615	0.683	0.52	0.0238971
Eif4a3	0.00810295	0.205352	0.736	0.594	0.0402937
Col18a1	0.0660141	0.205332	0.378	0.324	0.17226
Sec31a	0.00380309	0.205216	0.644	0.467	0.0230651
Gnb2	0.0454579	0.205199	0.975	0.971	0.13368
Adrm1	0.00474525	0.205195	0.608	0.484	0.0265909
Gorasp2	0.00149913	0.20518	0.503	0.336	0.0111495
Hmgb3	0.0158015	0.204893	0.764	0.635	0.0644784
Cd24a	0.0342857	0.204661	0.844	0.828	0.110952
Psmb1	0.0393536	0.204559	0.975	0.971	0.121766
Ccne1	0.0304935	0.204485	0.308	0.164	0.103
Clns1a	0.00666665	0.204461	0.714	0.59	0.0348673
Gsn	0.172396	0.204281	0.869	0.816	0.309879
Eif4g1	0.0156013	0.204074	0.675	0.52	0.0638762
Meg3	0.131862	0.203766	0.961	0.93	0.265936
Nap1l4	0.00982108	0.203725	0.75	0.664	0.0461452
Psmb7	0.00948188	0.203614	0.733	0.652	0.0451845
Actb	0.0524934	0.203561	1	1	0.149489
Tmem14c	0.0165987	0.203546	0.761	0.627	0.0665541
Sec11a	0.0186658	0.203483	0.894	0.848	0.0722856
Dgcr6	0.00614563	0.20339	0.719	0.602	0.0325625
Rsu1	0.0309568	0.203139	0.925	0.861	0.103863
Clic1	0.0825361	0.203131	0.975	0.975	0.199928
Rps27l	0.0608652	0.202362	0.942	0.93	0.162307
Lamp1	0.0358471	0.20229	0.928	0.889	0.11426
Igfbp4	0.146748	0.202221	0.986	0.967	0.284288
Rpl41	0.0061661	0.202184	1	1	0.0325999
Sf3b4	0.00170763	0.202066	0.486	0.328	0.0122813
Slirp	0.00608272	0.201796	0.653	0.529	0.0323334
Fkbp4	0.0160395	0.201373	0.836	0.783	0.0650956
Trir	0.0362099	0.201317	0.833	0.758	0.115114
Ndufc2	0.04281	0.2012	0.944	0.91	0.12879
Mapre1	0.0315738	0.200641	0.806	0.717	0.104901
Fam104a	0.0209473	0.200478	0.828	0.742	0.0780151
Sumo1	0.0377853	0.200192	0.942	0.918	0.118726
Rps20	0.0133496	0.199595	1	1	0.0571767
mt-Atp6	0.000869326	0.199573	1	1	0.00716678
Ap2s1	0.0339413	0.199505	0.858	0.791	0.110381
Cox6a1	0.0594247	0.199421	0.886	0.828	0.159692
Vim	0.0057201	0.199408	1	1	0.0306416
Marcksl1	0.0389009	0.199392	0.975	0.963	0.120727
Sh3gl1	0.00283026	0.199172	0.464	0.336	0.0183064
Dnajb11	0.00832053	0.199094	0.661	0.59	0.0407483
P3h3	0.0168687	0.199044	0.786	0.725	0.0672534
Lsp1	0.0286713	0.198885	1	0.992	0.0996123
Coa3	0.0192115	0.198851	0.844	0.754	0.073463
Fam114a1	0.00746435	0.198579	0.567	0.459	0.0378865
Dnajc9	0.0206079	0.198558	0.472	0.369	0.077068
Mettl23	0.0026275	0.198554	0.55	0.41	0.017224
Hnrnpa2b1	0.103956	0.19845	0.981	0.963	0.233683
Hras	0.0125771	0.198381	0.658	0.533	0.0548163
Ube2d3	0.0422663	0.198319	0.894	0.893	0.128047
Metap2	0.0412975	0.198201	0.919	0.881	0.126493
Snx3	0.0307091	0.198015	0.842	0.828	0.103585
Dut	0.00818918	0.198011	0.55	0.426	0.0403977
Akr1b3	0.00938324	0.197978	0.5	0.393	0.0448331
Atp5a1	0.0474165	0.197942	0.989	0.988	0.137939
Mesd	0.00799792	0.197897	0.711	0.561	0.0399404
Ano4	0.0652512	0.197625	0.256	0.107	0.170714
Lyrm2	0.00335726	0.197348	0.522	0.373	0.0208287
Snrpa	0.02187	0.196948	0.761	0.635	0.0812026
Banf1	0.0347061	0.196921	0.861	0.775	0.111795
Cox7b	0.0554932	0.196779	0.903	0.865	0.153888
Bcl7c	0.0338885	0.196761	0.853	0.795	0.110381
Ndufs2	0.0436818	0.196697	0.947	0.885	0.13083
Arhgdia	0.0315448	0.196683	0.867	0.787	0.104901
Wdr83os	0.0129657	0.196648	0.761	0.639	0.0561079
Traf4	0.00306829	0.196645	0.494	0.328	0.0195342
Mdh2	0.0398743	0.196372	0.889	0.824	0.123064
Psmd6	0.0256736	0.196283	0.847	0.791	0.0918208
Rbm25	0.0615565	0.196183	0.942	0.902	0.163084
Glrx5	0.0131607	0.19617	0.733	0.615	0.0568505
Psmc2	0.0187672	0.196074	0.772	0.717	0.0724474
Snrnp40	0.00447074	0.196034	0.594	0.447	0.0253446
Itga9	0.0304216	0.195578	0.781	0.627	0.1029
Gabarap	0.0884946	0.195569	0.981	0.984	0.20895
Vdac3	0.0451642	0.195558	0.925	0.865	0.1333
Polr3k	0.00299848	0.195441	0.511	0.369	0.0192669
Rac3	0.0100087	0.195149	0.617	0.455	0.0467199
Alx1	0.0878569	0.195096	0.911	0.828	0.208051
Txn2	0.0142591	0.195093	0.672	0.631	0.0599966
Ube2m	0.0364935	0.194985	0.881	0.799	0.115713
Fdps	0.0590249	0.194945	0.269	0.148	0.159362
Mrpl55	0.00281568	0.194839	0.461	0.311	0.0183064
Pdcd5	0.0467894	0.194615	0.947	0.918	0.136605
Fkbp9	0.0125394	0.194559	0.672	0.533	0.0547502
Ntan1	0.0348415	0.1945	0.769	0.68	0.112083
Lap3	0.0299294	0.194421	0.753	0.639	0.102231
Anp32a	0.123774	0.194255	0.958	0.939	0.257721
Cnbp	0.0598093	0.193898	0.964	0.91	0.160194
Tardbp	0.0107697	0.193824	0.592	0.496	0.0494186
Pdzd11	0.00405851	0.193774	0.519	0.414	0.0238971
Fubp1	0.0486833	0.19375	0.914	0.844	0.140726
Eftud2	0.00345172	0.193709	0.439	0.295	0.0213603
Ftl1	0.0232506	0.193661	1	1	0.0854159
Enah	0.0151773	0.193557	0.667	0.541	0.0631363
Tmed10	0.0780385	0.193434	0.967	0.951	0.192484
Rps7	0.0159138	0.19332	1	1	0.0648279
Cenpx	0.0144792	0.193112	0.667	0.574	0.0607129
Serp1	0.0125072	0.192986	0.669	0.516	0.0547502
Col6a2	0.251749	0.192986	0.861	0.836	0.391529
Fbn1	0.061286	0.192932	0.722	0.668	0.162894
Ppig	0.0581405	0.192561	0.897	0.844	0.15834
Arpc5	0.0291701	0.192383	0.822	0.713	0.100769
Ube2l3	0.035486	0.192069	0.856	0.75	0.113497
Creb3l1	0.0179676	0.192014	0.6	0.463	0.0702528
Ptp4a2	0.0336476	0.191952	0.767	0.684	0.110086
Cope	0.0409264	0.191852	0.881	0.807	0.125515
Glo1	0.0364398	0.191674	0.828	0.725	0.115694
Gtpbp4	0.0100849	0.191648	0.6	0.484	0.0468959
Lage3	0.0193239	0.191592	0.742	0.615	0.0735459
Tmem256	0.0698557	0.19156	0.917	0.869	0.179105
Uqcrc1	0.0404535	0.19136	0.867	0.779	0.124378
Ube2s	0.215487	0.191354	0.889	0.848	0.355217
Copg1	0.00780108	0.191285	0.569	0.447	0.0390375
Eif4a1	0.113282	0.191271	0.989	0.988	0.245908
Arf1	0.104749	0.19124	0.967	0.963	0.234576
Ift81	0.0033506	0.191225	0.497	0.34	0.0208287
Map1lc3a	0.045099	0.191205	0.964	0.881	0.13327
Ube2c	0.163066	0.191146	0.261	0.193	0.300768
Sem1	0.0776916	0.19109	0.975	0.988	0.192018
Cygb	0.05904	0.190783	0.497	0.398	0.159362
Hsd17b4	0.00535735	0.190779	0.592	0.443	0.0288893
Rps11	0.074395	0.19068	0.997	1	0.18634
Eloc	0.0248409	0.190662	0.783	0.676	0.0896336
Mtpn	0.0153063	0.190606	0.617	0.512	0.0631491
Ndufc1	0.0814763	0.190601	0.914	0.877	0.198946
Luzp1	0.0242734	0.190578	0.758	0.615	0.0878465
Map4	0.00960157	0.190576	0.544	0.426	0.0456074
Hars	0.0040113	0.190552	0.519	0.373	0.0238566
Lsm2	0.017827	0.190496	0.578	0.475	0.0698152
1110038F14Rik	0.0435487	0.190423	0.803	0.742	0.130592
Mrpl42	0.0425989	0.190116	0.842	0.766	0.128631
Timm17b	0.0322912	0.190098	0.722	0.652	0.106557
Trib2	0.0344488	0.19006	0.3	0.143	0.111113
Cnih2	0.0109024	0.189952	0.347	0.201	0.0498394
Myl12a	0.111503	0.189945	0.983	0.955	0.243644
G3bp1	0.042683	0.189865	0.867	0.82	0.128631
Trps1	0.0495977	0.189614	0.672	0.656	0.142747
Gm45187	0.0417278	0.189548	0.294	0.168	0.12749
Cd248	0.0165598	0.189508	0.708	0.557	0.0665541
Cotl1	0.0167471	0.189502	0.542	0.426	0.0669886
Tmem50a	0.0505379	0.189308	0.914	0.82	0.14511
Ier3ip1	0.0262939	0.189189	0.744	0.668	0.0932648
Mrpl18	0.032425	0.189099	0.781	0.742	0.106709
Ramp2	0.234001	0.188982	0.736	0.697	0.372929
Sltm	0.0336464	0.188857	0.692	0.602	0.110086
Mcm5	0.14239	0.188698	0.225	0.102	0.280399
Cyb5a	0.0597101	0.188632	0.897	0.828	0.160105
Eef1g	0.10133	0.188573	0.997	0.992	0.229028
Snx6	0.0381468	0.18855	0.836	0.738	0.119707
Fstl1	0.0970877	0.18848	0.986	0.959	0.222752
mt-Nd3	0.0958184	0.188277	0.997	0.984	0.220464
Grpel1	0.0252379	0.188033	0.706	0.689	0.0906625
Actg1	0.128269	0.188024	1	1	0.263175
Tmod3	0.0311084	0.187902	0.767	0.656	0.103863
Nid2	0.0308791	0.187607	0.681	0.545	0.103863
Jpt1	0.085776	0.187601	0.758	0.709	0.205322
Gpat4	0.00394741	0.187544	0.481	0.307	0.0235875
Cisd1	0.011175	0.187511	0.578	0.467	0.0507993
Eif6	0.0282498	0.187505	0.753	0.709	0.0985704
Fkbp10	0.0302488	0.187487	0.742	0.652	0.102782
Atp5g3	0.0779457	0.187487	0.925	0.91	0.192451
Ccnd3	0.124107	0.187123	0.864	0.828	0.258193
Btf3	0.131152	0.186987	0.997	0.996	0.265936
Rpl36a	0.106976	0.186871	1	1	0.237962
Smoc2	0.202862	0.186818	0.419	0.402	0.344447
Calm2	0.167396	0.186798	0.986	0.967	0.304552
Ube2k	0.0269555	0.186777	0.775	0.668	0.0950241
Nid1	0.106203	0.1867	0.844	0.775	0.237041
Rpl10a	0.0922633	0.186639	0.997	1	0.215134
Rps29	0.0196163	0.186605	1	1	0.0740789
Sec13	0.0137886	0.186428	0.639	0.5	0.0587284
Bcat2	0.00726847	0.186227	0.389	0.238	0.0374511
Lims1	0.0339493	0.186207	0.764	0.66	0.110381
Hnrnpa0	0.154723	0.186167	0.978	0.98	0.291759
Gtf2h5	0.055794	0.186155	0.875	0.775	0.154194
Mrps14	0.041472	0.186104	0.819	0.725	0.126868
Psme2	0.0303464	0.186065	0.739	0.635	0.102896
Tomm5	0.0539773	0.186012	0.831	0.701	0.152075
Tspan4	0.0550511	0.185645	0.719	0.635	0.153888
Map2k3	0.00726382	0.185606	0.561	0.434	0.0374511
Capzb	0.102057	0.185545	0.911	0.861	0.230243
Rbm4b	0.00481029	0.18535	0.486	0.344	0.0268219
Smarce1	0.0568223	0.185322	0.825	0.824	0.156149
Polr2m	0.0566625	0.1853	0.908	0.865	0.155886
Scp2	0.036703	0.185298	0.767	0.705	0.116075
Cacybp	0.0463838	0.185268	0.789	0.697	0.135747
Mcm4	0.0426751	0.185259	0.35	0.225	0.128631
Brk1	0.0686931	0.185169	0.858	0.807	0.177711
Ndufs6	0.0690912	0.185135	0.844	0.832	0.177809
Cdc37	0.0882975	0.185008	0.936	0.881	0.208688
Mrpl20	0.0443544	0.184966	0.75	0.676	0.132184
Yipf5	0.0187631	0.184955	0.692	0.561	0.0724474
Cops3	0.0227683	0.184835	0.703	0.566	0.0840249
Ndufa9	0.0128504	0.184798	0.633	0.496	0.0557078
Cst3	0.251789	0.184696	0.931	0.881	0.391529
Spcs1	0.131984	0.184517	0.906	0.885	0.265936
Gulp1	0.0159939	0.184276	0.569	0.459	0.0650454
Apip	0.00753792	0.184008	0.467	0.381	0.0380348
Vps28	0.0175909	0.183994	0.606	0.537	0.0690019
Rab24	0.0125321	0.183962	0.578	0.459	0.0547502
Arf4	0.131951	0.183962	0.972	0.971	0.265936
Degs1	0.0152944	0.183765	0.617	0.516	0.0631491
Syf2	0.0239232	0.183583	0.708	0.59	0.0868845
Gpr107	0.00861431	0.183504	0.403	0.258	0.0416501
Eci2	0.0471136	0.183494	0.789	0.689	0.137222
Hmgb2	0.549441	0.183462	0.853	0.832	0.620065
Cks2	0.0742549	0.183259	0.322	0.221	0.18634
Slc25a3	0.167554	0.183259	0.983	0.975	0.304552
Gins4	0.00936133	0.183107	0.528	0.41	0.0448165
Swi5	0.144474	0.183037	0.969	0.967	0.281538
Rcn3	0.203743	0.183031	0.969	0.951	0.345298
Bola3	0.0103056	0.182851	0.572	0.381	0.0475581
Ehd2	0.0132514	0.182801	0.406	0.262	0.0571408
Tmem208	0.0116922	0.182772	0.608	0.484	0.0521031
Sin3b	0.0652365	0.182751	0.839	0.758	0.170714
Hsbp1	0.0915903	0.182714	0.928	0.861	0.213975
Emilin1	0.156207	0.182586	0.958	0.955	0.29313
Cldn11	0.270843	0.182543	0.708	0.643	0.405597
Pja1	0.0592712	0.18235	0.828	0.77	0.159632
Hnrnpk	0.12044	0.182218	0.994	0.992	0.254042
Sdhb	0.0888101	0.182098	0.794	0.738	0.209289
Rala	0.0737985	0.182017	0.817	0.75	0.186054
Ptges3	0.0606845	0.181895	0.831	0.75	0.162181
Timm17a	0.0339319	0.181519	0.689	0.602	0.110381
Farsb	0.00630826	0.181477	0.461	0.303	0.0332364
Ppp2ca	0.0818294	0.18145	0.914	0.852	0.199408
App	0.123749	0.181412	0.814	0.717	0.257721
Tmem165	0.0450013	0.181326	0.839	0.717	0.133143
Bax	0.107229	0.181151	0.814	0.803	0.237962
Top1	0.144032	0.180973	0.989	0.971	0.281343
Cyb5r3	0.0301001	0.180943	0.644	0.529	0.102669
Sdf2l1	0.0295319	0.180867	0.333	0.164	0.1013
Plagl1	0.0238317	0.180832	0.514	0.377	0.0868845
Smo	0.0316376	0.180832	0.747	0.607	0.10497
Mrps33	0.0702812	0.18073	0.781	0.721	0.179851
Lsm6	0.0273554	0.180682	0.686	0.602	0.0961391
Nudcd2	0.0388397	0.180571	0.686	0.635	0.120727
Tmem80	0.0116975	0.180468	0.381	0.221	0.0521031
Rpl8	0.113348	0.180347	1	1	0.245908
Psmd7	0.100575	0.180204	0.9	0.869	0.227745
Fgfr1	0.0454174	0.180202	0.586	0.492	0.13368
Pdia4	0.0703881	0.180159	0.767	0.672	0.179851
Cirbp	0.0233998	0.180116	0.622	0.5	0.0856613
Mrpl17	0.0311332	0.180081	0.708	0.59	0.103863
Pmvk	0.0101842	0.180055	0.492	0.365	0.0471769
Ccnb2	0.292827	0.179964	0.194	0.107	0.421686
Rbmx	0.0134118	0.179854	0.525	0.41	0.0573242
Ssna1	0.0263074	0.179812	0.631	0.525	0.0932648
Rab8b	0.0126312	0.179796	0.367	0.25	0.0549536
Mpg	0.00982863	0.179593	0.511	0.406	0.0461452
Calm3	0.107456	0.179441	0.894	0.852	0.237962
Ptk7	0.0482947	0.179377	0.728	0.639	0.139825
Olfml3	0.213688	0.179322	0.956	0.947	0.354005
Zfp618	0.0140738	0.179312	0.514	0.385	0.0594204
Krit1	0.0194311	0.179202	0.628	0.525	0.0737228
Serpinb6a	0.094368	0.179194	0.839	0.734	0.218159
Mrpl3	0.00753814	0.179143	0.519	0.369	0.0380348
Ugp2	0.0143795	0.179131	0.606	0.471	0.0603989
Rnf187	0.0666385	0.179105	0.806	0.721	0.173703
Fis1	0.142897	0.178937	0.914	0.885	0.281169
Mrpl30	0.0615589	0.178934	0.792	0.725	0.163084
Eif5b	0.20997	0.17881	0.947	0.914	0.350479
Hsd17b12	0.00834403	0.178634	0.428	0.283	0.0407483
Zc3h15	0.114881	0.178575	0.897	0.857	0.247466
Ndufb2	0.0564364	0.178477	0.792	0.725	0.15544
Ilk	0.107631	0.178418	0.919	0.852	0.237962
Dpm3	0.104228	0.178071	0.894	0.873	0.233841
Celf1	0.0173769	0.177988	0.625	0.459	0.0685939
Fat3	0.0133264	0.177837	0.464	0.32	0.0571767
Rbms1	0.0798623	0.177834	0.786	0.697	0.195989
Ifitm2	0.259953	0.177756	0.989	0.988	0.397399
Phb2	0.107372	0.177528	0.908	0.844	0.237962
Smarcb1	0.0343636	0.17746	0.681	0.611	0.110986
Mphosph10	0.0103051	0.17738	0.447	0.299	0.0475581
Rab6a	0.0262569	0.177223	0.683	0.537	0.0932648
Mrps21	0.0652812	0.177056	0.842	0.734	0.170714
Bzw1	0.116321	0.176932	0.925	0.848	0.249904
Tssc4	0.00885377	0.176908	0.461	0.352	0.0426384
Ptprf	0.0140067	0.176908	0.428	0.295	0.0592701
Tecr	0.213282	0.176872	0.919	0.844	0.35364
H2afy2	0.0819605	0.176855	0.872	0.795	0.199526
Ndufs7	0.0847232	0.176853	0.858	0.816	0.203604
Pycr2	0.0111634	0.176836	0.469	0.316	0.0507993
Atp5l	0.179186	0.176787	0.975	0.971	0.317394
Clmp	0.0814763	0.176711	0.817	0.721	0.198946
Bsg	0.349034	0.176667	0.983	0.984	0.46514
Rbm28	0.01826	0.1766	0.578	0.455	0.0710535
mt-Nd4l	0.111094	0.176572	0.992	0.984	0.242967
Man1a2	0.0453929	0.176566	0.694	0.574	0.13368
BC003965	0.0107039	0.176314	0.492	0.352	0.0492095
Mcmbp	0.0289702	0.176066	0.331	0.18	0.100507
Arpp19	0.0835105	0.175907	0.828	0.734	0.201417
Tmed2	0.0937711	0.175895	0.928	0.877	0.217192
Arhgef1	0.00966722	0.175811	0.514	0.373	0.0458298
Apool	0.0112905	0.175769	0.444	0.303	0.0508491
Anapc11	0.121063	0.175733	0.731	0.68	0.254913
Ppp2r2d	0.0112455	0.175594	0.464	0.336	0.0508491
Smap1	0.122401	0.175594	0.869	0.787	0.2564
Timm13	0.154462	0.175569	0.903	0.832	0.291759
Mex3a	0.016355	0.175443	0.567	0.389	0.0659625
Luc7l3	0.114287	0.175396	0.85	0.77	0.247062
Tmx4	0.0418602	0.175301	0.5	0.434	0.127734
Ssr1	0.0268269	0.175195	0.644	0.529	0.0948301
Chtop	0.0221935	0.17504	0.625	0.492	0.082153
Rap2a	0.0278221	0.174963	0.6	0.475	0.0972175
Imp3	0.0752315	0.174942	0.797	0.738	0.187847
Myl9	0.259976	0.174873	0.969	0.975	0.397399
Kifap3	0.0532989	0.174865	0.75	0.615	0.150724
Ndufb10	0.124343	0.174852	0.922	0.873	0.258462
Gemin7	0.0402714	0.1747	0.636	0.541	0.123975
Phc2	0.0172595	0.17465	0.561	0.459	0.0682522
Ndufs3	0.0784356	0.174586	0.761	0.754	0.193094
Khdrbs1	0.093734	0.174336	0.792	0.717	0.217192
Ssbp4	0.0873893	0.174258	0.731	0.697	0.207396
Lactb	0.0191592	0.174121	0.478	0.365	0.0733781
Col6a1	0.223404	0.174023	0.894	0.848	0.362938
Parl	0.0108414	0.173997	0.478	0.332	0.0496539
Bmp4	0.159081	0.173873	0.639	0.529	0.296463
Psmc3	0.108297	0.173866	0.883	0.836	0.238783
Serbp1	0.367737	0.173782	0.989	0.992	0.475416
Polr2a	0.0369913	0.173767	0.678	0.541	0.116532
Ndufb5	0.190289	0.173669	0.953	0.951	0.32968
Chmp4b	0.0791985	0.173611	0.775	0.689	0.194556
Mbnl2	0.0689068	0.173591	0.828	0.746	0.177711
Eif1ax	0.0910098	0.173591	0.789	0.697	0.213233
Prelid3b	0.0115013	0.173558	0.475	0.324	0.0516035
Atp5b	0.360771	0.173541	0.994	0.992	0.472001
Mfap2	0.219315	0.173428	0.978	0.955	0.359558
Ppih	0.016858	0.173372	0.408	0.254	0.0672534
Dynll2	0.0579304	0.173228	0.625	0.512	0.157945
Zfp846	0.0460853	0.173183	0.311	0.143	0.135198
Wdr18	0.012439	0.173126	0.489	0.324	0.054606
Hspd1	0.173309	0.173126	0.911	0.881	0.310991
Sf3a2	0.0231688	0.17305	0.356	0.197	0.0852445
Mettl9	0.11722	0.173032	0.872	0.861	0.251285
Ccdc34	0.154685	0.172969	0.842	0.77	0.291759
Wisp1	0.0548048	0.172959	0.303	0.201	0.153378
Cyc1	0.084427	0.172831	0.806	0.73	0.203092
Cnn3	0.167491	0.172748	0.897	0.889	0.304552
Rpl12	0.233819	0.172569	1	1	0.372884
Ppp2r1a	0.0385486	0.17255	0.658	0.586	0.120387
Hmg20b	0.0687672	0.172502	0.65	0.545	0.177711
Gng11	0.216653	0.172305	0.756	0.701	0.356502
Usp50	0.0206296	0.17204	0.378	0.246	0.077068
Scd2	0.0887949	0.17204	0.703	0.643	0.209289
Eef1b2	0.541203	0.171938	0.994	1	0.613255
Sparc	0.5251	0.171915	0.997	0.996	0.602379
Rpn1	0.0760143	0.171884	0.781	0.742	0.189219
Tspan6	0.077123	0.171795	0.703	0.627	0.191196
Hnrnph1	0.108094	0.171787	0.831	0.775	0.238551
Vps29	0.0554754	0.17177	0.758	0.652	0.153888
S100a11	0.189407	0.17176	0.986	0.984	0.328767
Eif5	0.152133	0.171589	0.878	0.787	0.288817
AU019823	0.0181772	0.171556	0.394	0.279	0.0708445
Supt16	0.0570492	0.171481	0.722	0.668	0.156596
Sox12	0.0307588	0.171377	0.586	0.455	0.103609
Scaf11	0.125938	0.171372	0.733	0.713	0.260002
Rpl14	0.334021	0.171277	1	1	0.453821
Tpm2	0.3556	0.171158	0.978	0.967	0.468002
6330403K07Rik	0.144257	0.171085	0.839	0.775	0.281343
Mettl1	0.0301723	0.171063	0.497	0.377	0.102772
Nradd	0.0467756	0.170995	0.658	0.5	0.136605
Mrps24	0.130068	0.170883	0.867	0.816	0.26493
S1pr2	0.0147164	0.17068	0.411	0.291	0.0614952
Msrb2	0.0174474	0.17068	0.408	0.266	0.0686604
Txndc15	0.0428946	0.17068	0.689	0.553	0.12879
G3bp2	0.0718434	0.17068	0.667	0.537	0.183148
Rab14	0.219775	0.170524	0.933	0.898	0.359558
Pafah1b3	0.144048	0.170489	0.886	0.844	0.281343
Nfib	0.138523	0.170369	0.556	0.516	0.275457
Mrpl27	0.0152009	0.170286	0.508	0.377	0.0631363
Rpl4	0.349728	0.170259	0.997	1	0.46514
Snrpc	0.107259	0.170232	0.822	0.77	0.237962
Sar1a	0.0870214	0.169863	0.733	0.639	0.206878
Nono	0.145906	0.169852	0.931	0.885	0.283475
Ssr3	0.131182	0.169809	0.8	0.779	0.265936
Mki67	0.26822	0.169652	0.206	0.115	0.403637
Mmp11	0.0248995	0.169566	0.525	0.41	0.0897121
Cops4	0.0859963	0.169446	0.792	0.68	0.205445
Set	0.45447	0.169392	0.981	0.984	0.544201
Terf2ip	0.0238208	0.169292	0.372	0.221	0.0868845
Txndc12	0.0260674	0.169221	0.561	0.447	0.0930922
Birc5	0.395821	0.169216	0.219	0.139	0.497121
Copb2	0.116294	0.169175	0.856	0.799	0.249904
Rps9	0.432508	0.169109	1	1	0.525444
Rpl3	0.388123	0.168993	1	1	0.490834
Rpl30	0.518389	0.168818	1	1	0.597781
Emp3	0.257552	0.168732	0.972	0.971	0.396143
Ddx3y	0.0355793	0.168466	0.369	0.238	0.113555
Bloc1s1	0.0240137	0.168381	0.378	0.234	0.0870362
Psmd2	0.127976	0.168351	0.783	0.717	0.263106
Ptpa	0.0203188	0.168309	0.481	0.369	0.0762582
Tax1bp3	0.0541599	0.168276	0.703	0.557	0.152098
Nagk	0.0309945	0.168256	0.597	0.484	0.103863
Crtap	0.0669161	0.168192	0.664	0.512	0.174053
Ahsa2	0.0133538	0.168079	0.433	0.307	0.0571767
Rab1a	0.0421337	0.168055	0.639	0.516	0.128047
H1fx	0.330665	0.167994	0.856	0.844	0.450723
Prpf19	0.0571855	0.167946	0.711	0.549	0.156678
Rflnb	0.0555876	0.167875	0.514	0.402	0.153888
Csnk1e	0.0633884	0.16785	0.622	0.512	0.167021
Sms	0.0361794	0.167819	0.55	0.43	0.115114
Dcakd	0.0607997	0.167664	0.608	0.463	0.162307
Vdac1	0.158582	0.167651	0.897	0.832	0.29576
Rasl11b	0.0578915	0.167583	0.594	0.525	0.157945
Ace2	0.109475	0.167516	0.358	0.352	0.240726
Tor2a	0.0274045	0.167485	0.575	0.488	0.0961726
Pa2g4	0.101489	0.167477	0.722	0.668	0.229175
Ndufa10	0.16818	0.167258	0.872	0.807	0.305437
Myl6	0.447158	0.16718	0.997	1	0.53836
Lman2	0.0422788	0.167078	0.65	0.541	0.128047
Zfp326	0.0480923	0.166946	0.678	0.533	0.139547
Rplp2	0.449579	0.166685	1	1	0.540373
Brd3	0.120385	0.166527	0.694	0.611	0.254042
Timm22	0.0340797	0.166469	0.586	0.467	0.110655
Rps5	0.61648	0.166457	1	1	0.67596
1810022K09Rik	0.125487	0.166328	0.822	0.77	0.259693
Tsfm	0.0185819	0.166288	0.408	0.291	0.0720754
Marcks	0.460734	0.166238	0.994	0.996	0.548729
Wbp1	0.032777	0.166195	0.578	0.471	0.107721
Dtd1	0.0196024	0.166177	0.411	0.254	0.0740789
Plin3	0.0540265	0.165784	0.669	0.545	0.152075
Ash2l	0.0310849	0.165692	0.586	0.459	0.103863
Psap	0.188681	0.165684	0.842	0.758	0.328235
Sra1	0.100176	0.165544	0.683	0.594	0.227385
Ppp1r11	0.0582271	0.165421	0.672	0.553	0.158399
Elavl1	0.075718	0.165333	0.722	0.639	0.188674
Dap	0.0437864	0.165325	0.589	0.504	0.130982
Mrps12	0.031335	0.165268	0.547	0.451	0.104393
Pfdn5	0.432089	0.165204	0.994	1	0.52542
Psma2	0.232764	0.165177	0.908	0.885	0.371932
Ostf1	0.0543894	0.164867	0.578	0.5	0.152566
Prdx5	0.364723	0.164839	0.95	0.939	0.473828
Krcc1	0.0506201	0.164737	0.603	0.52	0.145175
Cmtm3	0.091565	0.164732	0.742	0.648	0.213975
Znrd1	0.0587777	0.164723	0.661	0.594	0.159362
Aip	0.0532834	0.164625	0.6	0.467	0.150724
Adamts7	0.0633696	0.164625	0.294	0.156	0.167021
Pdap1	0.400634	0.16459	0.964	0.934	0.498639
Tcf4	0.243789	0.164547	0.65	0.578	0.383999
Hist1h1b	0.403496	0.164532	0.217	0.189	0.501091
Rfc1	0.117273	0.164494	0.75	0.664	0.251285
Sae1	0.100229	0.164311	0.742	0.664	0.227385
Ss18l2	0.0296496	0.16429	0.378	0.23	0.10156
Sec62	0.360382	0.164043	0.964	0.951	0.47197
Rad23b	0.0275783	0.163996	0.542	0.439	0.0965042
Pbx1	0.32152	0.163952	0.994	0.996	0.442741
Zfp91	0.153328	0.163946	0.772	0.73	0.290189
Gna14	0.02696	0.163935	0.447	0.295	0.0950241
Unc5c	0.0954519	0.163788	0.564	0.414	0.21993
Aldh2	0.245348	0.163687	0.961	0.918	0.385456
Fkbp2	0.0727673	0.16339	0.65	0.582	0.184729
Tenm3	0.0687552	0.163354	0.564	0.422	0.177711
Csnk1g2	0.074777	0.163327	0.672	0.557	0.187096
Mcm7	0.0388345	0.163316	0.403	0.266	0.120727
Cops9	0.153542	0.163225	0.856	0.77	0.290368
Rnps1	0.0695696	0.163201	0.603	0.525	0.178851
Chchd7	0.0444071	0.163133	0.575	0.516	0.132184
Smarcc1	0.197513	0.163133	0.803	0.721	0.33788
Eef1a1	0.814206	0.16306	1	1	0.84024
Mvk	0.0272796	0.162951	0.406	0.32	0.0960117
Snap47	0.0749048	0.162677	0.644	0.529	0.187224
Dchs1	0.0226824	0.162622	0.489	0.369	0.0838353
Dhx9	0.0784446	0.162608	0.619	0.529	0.193094
Lbh	0.279093	0.162413	0.897	0.836	0.411117
Hsd17b10	0.235392	0.162369	0.911	0.865	0.374656
Gng5	0.497268	0.162315	0.989	0.98	0.579471
Cenpa	0.387673	0.162129	0.222	0.139	0.490797
Ube2f	0.0275622	0.162081	0.392	0.25	0.0965042
Rpl11	0.789596	0.161982	1	1	0.82099
Fam92a	0.118573	0.161874	0.783	0.664	0.252512
Rpl22l1	0.689177	0.161839	0.989	0.996	0.739991
Rap1b	0.141086	0.16181	0.744	0.643	0.278943
Cox7a2	0.470653	0.161703	0.953	0.934	0.558627
Ckap4	0.424579	0.161627	0.942	0.873	0.520451
Plxnb2	0.0294067	0.161616	0.544	0.389	0.101299
Lhfp	0.488847	0.161525	0.939	0.93	0.572518
Rpl34	0.904776	0.16145	0.997	1	0.919521
Cox20	0.072627	0.161421	0.722	0.594	0.184729
Slc6a6	0.0651605	0.161369	0.569	0.475	0.170714
Magoh	0.0992138	0.161338	0.714	0.635	0.225988
Col16a1	0.103043	0.161188	0.667	0.619	0.232038
Dda1	0.0290287	0.161111	0.492	0.361	0.100519
Snai1	0.0349062	0.161111	0.514	0.377	0.112143
Lrpap1	0.14159	0.161111	0.806	0.742	0.279275
Stk25	0.029491	0.161011	0.544	0.434	0.1013
Rfc2	0.0310798	0.160901	0.494	0.361	0.103863
Eif2s1	0.135792	0.160892	0.706	0.652	0.272414
Nt5c3b	0.0284782	0.160699	0.525	0.434	0.0990829
Scoc	0.0219953	0.160334	0.483	0.32	0.0815435
Erg28	0.0553988	0.160303	0.622	0.533	0.153888
Gtf2b	0.0355143	0.160285	0.522	0.389	0.113497
Wt1	0.290401	0.160172	0.217	0.148	0.41964
Tcea1	0.102672	0.160145	0.728	0.631	0.231416
Fbxo22	0.0341248	0.160098	0.525	0.426	0.110655
Immt	0.121583	0.160092	0.731	0.701	0.255787
Dnaja2	0.169746	0.160066	0.828	0.783	0.306704
Sugt1	0.14717	0.160033	0.781	0.754	0.284288
Vps4a	0.0180926	0.159962	0.456	0.307	0.070628
Scand1	0.264468	0.159891	0.919	0.877	0.401238
Mcm2	0.127983	0.159783	0.275	0.139	0.263106
Aurkaip1	0.176621	0.159403	0.772	0.705	0.315215
Chtf8	0.0292654	0.159361	0.419	0.311	0.100955
Cfdp1	0.289256	0.159156	0.931	0.914	0.419481
Gpx8	0.228786	0.15901	0.883	0.844	0.367266
Gnaq	0.186404	0.158833	0.717	0.648	0.325438
Thoc3	0.0398144	0.158673	0.558	0.467	0.123035
mt-Atp8	0.186637	0.158644	0.964	0.914	0.325611
Eva1b	0.338364	0.158577	0.983	0.963	0.45709
Srrt	0.0591505	0.15855	0.536	0.41	0.159484
Rpl19	0.927713	0.1585	0.997	1	0.9393
Cmpk1	0.0593674	0.158454	0.633	0.537	0.159692
Acin1	0.229784	0.158424	0.797	0.717	0.368381
Atp6v0d1	0.076636	0.158395	0.667	0.561	0.190377
Fam103a1	0.0402609	0.15838	0.628	0.459	0.123975
Unc50	0.0350138	0.158295	0.531	0.422	0.11234
Eid1	0.349811	0.158269	0.972	0.967	0.46514
Ubfd1	0.0262545	0.158236	0.456	0.283	0.0932648
Fndc4	0.0298249	0.158197	0.483	0.357	0.102017
1110059E24Rik	0.025198	0.157919	0.453	0.307	0.0906531
Pmpcb	0.0532029	0.157855	0.653	0.516	0.150724
Prkra	0.0735347	0.157837	0.664	0.57	0.186005
Puf60	0.182727	0.157777	0.822	0.754	0.32249
Angpt1	0.0445143	0.157608	0.394	0.262	0.132184
Cops8	0.0820678	0.157608	0.675	0.59	0.199526
Lsm12	0.163995	0.157608	0.756	0.713	0.301131
Dynlrb1	0.219913	0.157608	0.875	0.848	0.359558
Fam133b	0.110927	0.157501	0.678	0.574	0.24287
Chchd2	0.862258	0.157435	0.997	0.992	0.879619
Rab34	0.16294	0.157286	0.853	0.738	0.300768
Mospd3	0.0456549	0.157257	0.35	0.221	0.134098
Gatad1	0.0577528	0.157111	0.608	0.492	0.157814
Arpc5l	0.0859289	0.157041	0.697	0.594	0.205445
Mrps34	0.0448658	0.156946	0.553	0.434	0.133066
Ddx1	0.206157	0.156925	0.775	0.746	0.346492
Mrpl11	0.0904572	0.156921	0.636	0.545	0.212553
Rpl28	0.731998	0.156891	1	1	0.774682
Ptbp1	0.0993345	0.156854	0.678	0.619	0.225988
Carnmt1	0.0617257	0.156713	0.578	0.496	0.163348
Rpl15	0.753502	0.156637	1	1	0.792268
Slc35b1	0.0444387	0.15645	0.469	0.361	0.132184
Aig1	0.0372704	0.156291	0.475	0.336	0.11726
Yeats4	0.0812182	0.156291	0.625	0.525	0.198748
Cpxm1	0.168668	0.156241	0.736	0.627	0.305891
Rps3a1	0.740505	0.156194	1	1	0.781644
Irak1bp1	0.0444669	0.15592	0.372	0.23	0.132184
Sec24d	0.0319787	0.155909	0.422	0.311	0.105813
Csnk2b	0.14605	0.15557	0.744	0.668	0.283475
Mycbp	0.0382796	0.155481	0.381	0.279	0.119815
Mri1	0.0369784	0.155405	0.394	0.221	0.116532
Sema5a	0.719812	0.155347	0.65	0.643	0.764446
Nras	0.0366785	0.15533	0.444	0.32	0.116075
Psme1	0.185434	0.155325	0.786	0.738	0.324441
Fam96b	0.0552603	0.155243	0.564	0.439	0.153888
Gstk1	0.11831	0.155238	0.269	0.168	0.252482
Strn4	0.0355032	0.155068	0.417	0.299	0.113497
Gar1	0.0426104	0.155048	0.45	0.357	0.128631
Tmem167	0.373804	0.154951	0.889	0.828	0.480011
Atrx	0.424088	0.154927	0.925	0.881	0.520374
Mum1	0.0343077	0.154866	0.439	0.324	0.110952
Cxxc4	0.108699	0.154866	0.369	0.275	0.239453
Taf1d	0.169605	0.154802	0.697	0.627	0.306704
Col27a1	0.0422258	0.154771	0.442	0.324	0.128047
Coq7	0.0469932	0.154763	0.553	0.393	0.137035
Htatsf1	0.0572725	0.15468	0.55	0.451	0.156678
Ube2v2	0.131654	0.154555	0.731	0.656	0.265936
Tpr	0.354175	0.154543	0.9	0.877	0.467365
Bysl	0.11703	0.154452	0.289	0.135	0.251206
Rpl31	0.702844	0.154449	0.997	1	0.750359
Lamtor5	0.11427	0.154419	0.719	0.639	0.247062
Timp2	0.213004	0.154355	0.853	0.803	0.353601
Gpm6b	0.23843	0.154336	0.669	0.643	0.378747
Shkbp1	0.0481284	0.154247	0.344	0.209	0.139547
Ppic	0.426367	0.154215	0.953	0.914	0.521855
Mcfd2	0.0336777	0.15418	0.419	0.25	0.110086
Mrps18a	0.0876192	0.154172	0.636	0.512	0.20769
Sh3bp5	0.0510605	0.154151	0.475	0.365	0.146093
Zfp771	0.14197	0.153902	0.681	0.643	0.279799
Mpzl1	0.149782	0.153902	0.689	0.602	0.286434
Vps36	0.0540976	0.153753	0.511	0.418	0.152098
Pcbp4	0.0428793	0.153639	0.497	0.406	0.12879
Itfg1	0.0510476	0.153623	0.578	0.434	0.146093
Dctn2	0.347114	0.153605	0.886	0.844	0.464728
Pfdn1	0.252304	0.153593	0.847	0.783	0.391579
Usp10	0.11757	0.153551	0.294	0.148	0.251699
Prrx2	0.0560539	0.153452	0.461	0.385	0.154607
Cpsf2	0.0382432	0.153105	0.419	0.291	0.119815
Cwc15	0.202958	0.153068	0.786	0.705	0.344447
Ost4	0.275915	0.153024	0.828	0.799	0.409289
Mlf2	0.292048	0.153024	0.817	0.779	0.42152
Uba2	0.122102	0.152919	0.689	0.602	0.255993
Mogs	0.0420646	0.152886	0.397	0.27	0.128047
Phf20	0.06209	0.152849	0.511	0.402	0.164134
Wtap	0.0462607	0.152812	0.483	0.393	0.135549
Ttc33	0.0493291	0.15278	0.361	0.23	0.142143
Ucp2	0.199065	0.152661	0.464	0.357	0.339308
Caprin1	0.226629	0.152633	0.811	0.734	0.365492
Cops6	0.31118	0.152566	0.886	0.824	0.43369
Impdh2	0.184721	0.152168	0.767	0.705	0.323895
Cnn2	0.568819	0.152156	0.989	0.971	0.635447
Lig1	0.194135	0.152104	0.319	0.246	0.334138
Snd1	0.0420835	0.15198	0.439	0.336	0.128047
Tcaf1	0.119522	0.151949	0.656	0.545	0.253424
Pole4	0.0743982	0.151902	0.569	0.434	0.18634
Cdc5l	0.104069	0.151844	0.658	0.496	0.233698
Adprhl2	0.0369151	0.151832	0.419	0.299	0.116532
Mrpl51	0.163551	0.151822	0.722	0.656	0.300875
Rcn1	0.469715	0.151822	0.969	0.93	0.557787
Abhd8	0.0531991	0.151795	0.4	0.283	0.150724
Matr3	0.257688	0.151795	0.844	0.762	0.396143
Uri1	0.0539432	0.151773	0.564	0.373	0.152075
Ncl	0.526308	0.151754	0.992	0.988	0.602911
Pcdh18	0.0690343	0.151743	0.528	0.455	0.177809
Pitpna	0.158215	0.151743	0.683	0.619	0.295302
Nbdy	0.118557	0.151655	0.669	0.59	0.252512
Sdhc	0.118351	0.151469	0.653	0.639	0.252482
Cdc16	0.131902	0.15139	0.697	0.615	0.265936
Col4a1	0.564534	0.151338	0.989	0.98	0.632942
Ndufb7	0.292857	0.151304	0.822	0.787	0.421686
Ap3s1	0.0834199	0.151223	0.611	0.541	0.201417
Efna2	0.0551256	0.151112	0.383	0.246	0.153888
Mrpl21	0.120074	0.151104	0.65	0.582	0.253931
Wapl	0.0642468	0.151072	0.561	0.471	0.1691
Scarf2	0.0730035	0.150877	0.561	0.475	0.185135
Hoxd9	0.127505	0.150801	0.6	0.537	0.262789
Arl6ip4	0.0613713	0.150702	0.531	0.451	0.162942
Pnn	0.330859	0.150679	0.897	0.898	0.450723
Trim28	0.220661	0.150646	0.756	0.701	0.360167
Zrsr2	0.115468	0.150612	0.639	0.549	0.248511
Mtx2	0.16163	0.150559	0.708	0.623	0.299151
Bag6	0.0560704	0.150526	0.469	0.373	0.154607
Bbx	0.138066	0.150426	0.65	0.537	0.274777
Hdgf	0.291345	0.150395	0.858	0.82	0.420754
mt-Co2	0.138635	0.150278	1	1	0.275457
Nip7	0.0487217	0.150061	0.492	0.385	0.140726
Szrd1	0.0596158	0.150061	0.375	0.266	0.160028
2900097C17Rik	0.0696533	0.150061	0.606	0.463	0.178877
Zeb2	0.722768	0.15003	1	0.996	0.766582
Psmd13	0.187133	0.149907	0.753	0.668	0.326242
Zfp207	0.123305	0.149881	0.658	0.578	0.257594
Nrep	0.453589	0.149865	0.892	0.857	0.543413
Mgat4b	0.0763494	0.14985	0.533	0.43	0.189859
Rab18	0.265683	0.14981	0.864	0.766	0.40233
Nup62	0.140487	0.149773	0.283	0.172	0.278229
Hopx	0.166376	0.149773	0.264	0.148	0.303773
1110004F10Rik	0.425618	0.149707	0.931	0.939	0.521199
Dnttip2	0.114584	0.149682	0.611	0.529	0.247073
Psma5	0.380886	0.149659	0.883	0.844	0.485291
Ip6k2	0.0449829	0.149583	0.461	0.32	0.133143
Ptrh2	0.0609828	0.14953	0.367	0.254	0.162443
Snrpa1	0.139232	0.14953	0.644	0.578	0.276418
Gdi2	0.342768	0.149487	0.906	0.877	0.460926
B230219D22Rik	0.255803	0.149485	0.753	0.742	0.394615
Phf14	0.210994	0.149336	0.772	0.697	0.351946
Ptpn1	0.0933614	0.149206	0.528	0.422	0.216862
Xbp1	0.219993	0.149174	0.714	0.676	0.359558
Mcat	0.147981	0.149174	0.281	0.143	0.284949
H2-D1	0.510302	0.149102	0.164	0.061	0.589855
Fbl	0.248556	0.14908	0.778	0.734	0.389239
Zfp322a	0.062826	0.149	0.567	0.463	0.165899
Timm8b	0.240206	0.148905	0.736	0.701	0.380575
Jtb	0.0653668	0.148797	0.569	0.459	0.170754
Agpat2	0.0501904	0.14877	0.392	0.283	0.144282
Mgat2	0.0863443	0.148647	0.575	0.443	0.205872
Psma6	0.306633	0.148558	0.831	0.766	0.431308
Clcn4	0.061061	0.148457	0.481	0.357	0.162473
Ppil1	0.0743341	0.148457	0.344	0.234	0.18634
1810037I17Rik	0.228325	0.148417	0.758	0.676	0.36701
Aida	0.0529413	0.148165	0.381	0.209	0.150504
Hmox2	0.144004	0.148153	0.672	0.602	0.281343
Ppp1cc	0.274129	0.148016	0.831	0.705	0.407756
Gm8186	0.0481415	0.147865	0.439	0.332	0.139547
Kif5b	0.392203	0.147865	0.867	0.799	0.49345
Blmh	0.192519	0.147838	0.786	0.689	0.33206
Psma1	0.250103	0.147814	0.767	0.709	0.390655
Aprt	0.603402	0.147784	0.933	0.93	0.663555
B2m	0.122998	0.147683	0.572	0.463	0.257366
Tpgs1	0.0546491	0.147573	0.514	0.365	0.153118
Echs1	0.261386	0.147537	0.747	0.717	0.398803
Mrps22	0.137524	0.147498	0.294	0.18	0.274597
Rpl18	0.474672	0.147476	1	1	0.561753
Snw1	0.258524	0.147401	0.808	0.68	0.396682
Cd63	0.632778	0.147392	0.997	0.996	0.689788
Galk1	0.284578	0.147283	0.817	0.709	0.41646
Dnajc19	0.120985	0.147196	0.619	0.512	0.254913
Naca	0.624173	0.147119	0.997	1	0.682856
Armcx3	0.112521	0.147026	0.631	0.52	0.245207
Rap1a	0.215584	0.147026	0.744	0.66	0.355217
Aamp	0.400371	0.14697	0.869	0.852	0.498567
Srsf4	0.060398	0.146787	0.464	0.352	0.161593
Cuedc2	0.253971	0.146705	0.781	0.713	0.392413
Oser1	0.0491064	0.146654	0.467	0.311	0.141669
Surf4	0.141262	0.146582	0.575	0.467	0.278943
Pofut2	0.147006	0.146531	0.661	0.553	0.284288
Ak2	0.0987629	0.146525	0.611	0.459	0.225767
Ggnbp2	0.0981598	0.146466	0.569	0.5	0.225
Pin1	0.1722	0.146335	0.667	0.639	0.309757
Gtf3c6	0.191641	0.146207	0.592	0.586	0.331251
Dapk3	0.0727078	0.146137	0.508	0.414	0.184729
Cct2	0.450247	0.146128	0.936	0.91	0.540474
2410015M20Rik	0.441202	0.146063	0.864	0.816	0.532207
Rps4x	0.380275	0.145914	1	1	0.485291
Snapc5	0.053453	0.145908	0.536	0.393	0.150984
Rpl7a	0.736703	0.145828	0.997	1	0.779322
Ap1m1	0.0727266	0.145708	0.361	0.221	0.184729
Mrps25	0.0882009	0.145665	0.553	0.434	0.208662
Tnrc6c	0.21879	0.145546	0.714	0.648	0.35904
Hpf1	0.0934924	0.145476	0.592	0.516	0.216959
Eif3i	0.589302	0.145452	0.958	0.922	0.653372
Drap1	0.61793	0.14544	0.919	0.914	0.677245
Cpsf6	0.11398	0.145304	0.639	0.508	0.246907
Gna11	0.163122	0.145292	0.65	0.598	0.300768
Plekha5	0.296392	0.145202	0.672	0.652	0.423766
Eif2s2	0.774105	0.144994	0.961	0.955	0.809382
Scfd1	0.0786398	0.144972	0.514	0.439	0.193379
Commd2	0.082431	0.144972	0.553	0.463	0.199872
Imp4	0.0676553	0.144923	0.364	0.221	0.175601
Rbm18	0.0587584	0.144662	0.492	0.373	0.159362
Nae1	0.0823461	0.144629	0.553	0.439	0.199866
Stard3nl	0.0685677	0.144606	0.531	0.447	0.177711
Lrrc41	0.0736995	0.144581	0.356	0.242	0.186054
Copz1	0.0940198	0.144462	0.561	0.488	0.217561
AI837181	0.0522845	0.144441	0.464	0.344	0.149244
Chd1	0.089493	0.144363	0.539	0.41	0.210694
Uqcrb	0.658506	0.144251	0.947	0.951	0.712088
Jak1	0.407407	0.1442	0.794	0.754	0.504745
Mrps36	0.0999039	0.144175	0.636	0.525	0.227071
Ndufb11	0.594919	0.14407	0.956	0.947	0.657955
Gbf1	0.0698893	0.144043	0.517	0.389	0.179105
Cdk5	0.118212	0.144012	0.317	0.225	0.252482
Gins2	0.251452	0.143944	0.258	0.139	0.391505
Saysd1	0.0769391	0.143869	0.383	0.258	0.190935
Tbx2	0.601489	0.143869	0.728	0.689	0.661911
Adh5	0.543503	0.14382	0.897	0.914	0.615362
Cnot6	0.0988315	0.143813	0.542	0.43	0.225767
Phf23	0.0590321	0.143742	0.45	0.324	0.159362
Grcc10	0.0674828	0.143742	0.436	0.328	0.17534
Mrps5	0.1144	0.143719	0.597	0.508	0.247073
Kcmf1	0.117898	0.143719	0.636	0.533	0.25218
Wdr45b	0.157314	0.143673	0.631	0.541	0.294345
Mrpl49	0.0688419	0.143473	0.392	0.295	0.177711
Naa10	0.0988658	0.143438	0.55	0.475	0.225767
Eef1e1	0.0993006	0.143438	0.336	0.205	0.225988
Pcolce	0.737922	0.143281	0.917	0.914	0.780272
Park7	0.62329	0.143252	0.958	0.926	0.682196
Epha3	0.137092	0.143139	0.558	0.508	0.273958
Cavin3	0.411486	0.143059	0.606	0.525	0.507986
Ctbp1	0.213318	0.143039	0.728	0.635	0.35364
Dkc1	0.0712017	0.142977	0.464	0.344	0.181703
Psmc5	0.349381	0.142771	0.831	0.766	0.46514
Tbc1d24	0.0589611	0.142755	0.419	0.283	0.159362
Bud31	0.103966	0.142699	0.628	0.459	0.233683
Dcun1d5	0.242589	0.142649	0.767	0.639	0.382852
Zwint	0.190325	0.142609	0.6	0.537	0.32968
Erp44	0.112432	0.142549	0.575	0.488	0.245207
Aen	0.0929087	0.142482	0.328	0.193	0.216224
Laptm4a	0.692025	0.14244	0.972	0.971	0.742392
Dbnl	0.110225	0.142384	0.628	0.516	0.241939
Lsm3	0.241279	0.14213	0.758	0.68	0.381528
Cbfb	0.139433	0.142093	0.3	0.193	0.276591
Ramp3	0.362542	0.141913	0.192	0.082	0.472166
Nsd1	0.273965	0.14189	0.792	0.754	0.407756
Cfl2	0.395369	0.141692	0.822	0.811	0.497121
Serpine2	0.990502	0.141692	0.753	0.697	0.992546
Ywhaz	0.408895	0.141608	0.833	0.754	0.506039
Praf2	0.0867537	0.141516	0.394	0.283	0.206443
Ufm1	0.145938	0.141416	0.567	0.496	0.283475
Mrpl36	0.100465	0.141388	0.522	0.443	0.227709
Plpp1	0.0967382	0.141362	0.428	0.336	0.22237
Scmh1	0.0735759	0.141352	0.414	0.324	0.186005
Eif3f	0.941956	0.141335	0.989	1	0.952593
Tmed5	0.135871	0.14132	0.35	0.238	0.272414
Emc3	0.1197	0.141281	0.603	0.52	0.253581
Maz	0.205957	0.141183	0.639	0.566	0.346492
Hat1	0.105029	0.141172	0.406	0.295	0.23477
Ddr2	0.143603	0.141121	0.55	0.459	0.281343
Nubp1	0.11058	0.141121	0.333	0.238	0.242498
Rcn2	0.380781	0.141102	0.778	0.713	0.485291
Cnpy2	0.632102	0.141066	0.956	0.934	0.689669
Gm1673	0.346187	0.141048	0.719	0.648	0.464383
Nxf1	0.498836	0.140875	0.839	0.816	0.58084
Atp5c1	0.826272	0.140865	0.981	0.988	0.850399
Akr7a5	0.125242	0.140848	0.569	0.5	0.259445
Snrpe	0.777454	0.140816	0.961	0.951	0.811837
Dpf2	0.0643626	0.140814	0.447	0.336	0.169222
Tmx3	0.06464	0.140814	0.422	0.275	0.169767
Ubtf	0.21247	0.140794	0.717	0.631	0.353173
Cul7	0.0854994	0.140787	0.375	0.27	0.204862
Pxdn	0.106695	0.140758	0.503	0.426	0.237622
Ap2m1	0.37999	0.140758	0.778	0.766	0.485291
Batf3	0.225991	0.14066	0.247	0.131	0.364704
Efr3a	0.0954959	0.140648	0.403	0.303	0.21993
Fam96a	0.163032	0.140632	0.606	0.545	0.300768
Efna4	0.0667923	0.140616	0.417	0.307	0.173918
Pabpc1	0.792806	0.140591	0.958	0.955	0.823624
Mettl16	0.0812318	0.140484	0.419	0.316	0.198748
Mdfi	0.0843503	0.140433	0.497	0.406	0.203092
Rps3	0.335374	0.140409	1	1	0.454249
Ogn	0.44139	0.140404	0.644	0.648	0.532207
Cnih4	0.154826	0.140384	0.644	0.578	0.291759
Fkbp14	0.0734179	0.140368	0.378	0.225	0.185992
Flna	0.775439	0.140305	0.986	0.963	0.81008
Rbx1	0.793745	0.140239	0.964	0.955	0.824248
B3gat3	0.0865502	0.140166	0.422	0.336	0.206161
Midn	0.0862562	0.140101	0.483	0.377	0.205864
Ammecr1l	0.092591	0.140021	0.35	0.254	0.215691
Taf10	0.307414	0.13994	0.772	0.713	0.431908
Utp3	0.261608	0.139908	0.736	0.668	0.398891
Ano6	0.0831323	0.139858	0.467	0.352	0.201172
Adora2b	0.581558	0.139838	0.15	0.033	0.647363
Psmd10	0.0738247	0.139804	0.442	0.348	0.186054
Epn1	0.107139	0.139725	0.531	0.459	0.237962
Nucb2	0.104512	0.139525	0.364	0.27	0.234261
Btbd1	0.110949	0.139511	0.6	0.475	0.24287
Emc6	0.160586	0.139473	0.664	0.545	0.297717
Abhd17a	0.257353	0.139383	0.689	0.623	0.396128
Fbxl7	0.356557	0.139372	0.661	0.594	0.468981
Ubn1	0.302978	0.139319	0.742	0.701	0.427902
Ipo9	0.077582	0.139292	0.389	0.266	0.191943
Ndufs8	0.29551	0.139269	0.786	0.689	0.423501
Edf1	0.68417	0.139267	0.942	0.906	0.735483
Slc44a2	0.0854808	0.139215	0.356	0.234	0.204862
Exosc3	0.0756159	0.139132	0.453	0.344	0.188613
2210016F16Rik	0.077496	0.139132	0.453	0.332	0.191925
Zgpat	0.242452	0.138948	0.253	0.131	0.382852
Rnf166	0.163892	0.138868	0.286	0.172	0.301131
Ubxn1	0.583847	0.138795	0.922	0.885	0.64955
Brd1	0.199092	0.138787	0.592	0.533	0.339308
Stx12	0.0931011	0.138723	0.508	0.406	0.216465
Actl6a	0.131543	0.138697	0.55	0.459	0.265936
U2af2	0.178581	0.138564	0.614	0.529	0.3166
Xrn2	0.253848	0.138544	0.717	0.643	0.392413
Alkbh5	0.0704022	0.138517	0.406	0.299	0.179851
Fblim1	0.276338	0.138226	0.694	0.619	0.40929
Tubg1	0.129525	0.138161	0.356	0.246	0.264487
Ccz1	0.0835647	0.13815	0.497	0.381	0.201417
Sppl3	0.0848319	0.13815	0.506	0.398	0.203664
Nckap1	0.131591	0.138085	0.525	0.443	0.265936
Prdx3	0.112074	0.138055	0.558	0.48	0.244672
Psmg2	0.082124	0.137945	0.444	0.336	0.199526
Spc24	0.514063	0.137821	0.183	0.111	0.593356
Arl2bp	0.150473	0.1378	0.589	0.52	0.28747
Bcas2	0.378842	0.137787	0.864	0.783	0.484663
Smim19	0.0982992	0.137763	0.506	0.414	0.225107
Ndufs5	0.529317	0.137753	0.875	0.869	0.605002
Prickle1	0.121963	0.137743	0.503	0.414	0.255921
Mea1	0.123074	0.137638	0.492	0.398	0.257366
Polr2e	0.351897	0.137638	0.756	0.717	0.466073
Denr	0.433128	0.137523	0.806	0.775	0.525633
Rpl13	0.0195263	0.137514	1	1	0.0739688
Pdzd2	0.0909617	0.137431	0.392	0.27	0.213233
Pafah1b2	0.235388	0.137431	0.719	0.631	0.374656
Ebf1	0.829538	0.137424	0.569	0.529	0.853039
Usmg5	0.477053	0.137402	0.869	0.844	0.562654
Xpnpep1	0.148339	0.137372	0.6	0.537	0.285128
Txndc17	0.600592	0.137369	0.917	0.852	0.661522
Ppp2r2a	0.258444	0.137339	0.683	0.598	0.396682
Rab26os	0.271734	0.137318	0.261	0.131	0.406236
Pbx3	0.129433	0.137279	0.436	0.385	0.264487
Cap1	0.175572	0.137157	0.639	0.52	0.313734
Gon4l	0.107613	0.137042	0.533	0.451	0.237962
Rab5c	0.194101	0.136954	0.647	0.549	0.334138
Larp7	0.178133	0.136948	0.608	0.512	0.31655
Ube2j2	0.104973	0.13692	0.539	0.414	0.23477
Sdhaf1	0.0915083	0.136903	0.456	0.369	0.213975
Clpx	0.100773	0.136893	0.417	0.332	0.227982
Pigp	0.203542	0.136863	0.647	0.549	0.345198
Snrpb2	0.488386	0.136859	0.767	0.73	0.572412
Thrap3	0.435887	0.136822	0.814	0.791	0.527927
Sigmar1	0.08972	0.136764	0.433	0.348	0.211024
Txndc9	0.347343	0.136761	0.744	0.75	0.464728
Cul4a	0.125904	0.136749	0.375	0.311	0.260002
Kpnb1	0.194543	0.13663	0.592	0.488	0.334367
Evl	0.259778	0.136596	0.672	0.59	0.397399
Ythdf2	0.120357	0.136577	0.522	0.426	0.254042
Gtf2i	0.295176	0.136409	0.756	0.668	0.423396
Gpx3	0.124642	0.136391	0.419	0.328	0.258643
Tcerg1	0.143499	0.136358	0.528	0.426	0.281343
Tpm4	0.992782	0.136354	0.983	0.959	0.994008
Sumo3	0.388078	0.136331	0.783	0.766	0.490834
Tbrg1	0.424326	0.13621	0.769	0.77	0.520404
Tubb6	0.267716	0.136205	0.517	0.389	0.403419
Fopnl	0.14422	0.136144	0.564	0.488	0.281343
S100a13	0.198113	0.136107	0.572	0.525	0.338351
Aldh7a1	0.196572	0.136104	0.703	0.586	0.336901
Slc25a11	0.308347	0.136048	0.736	0.697	0.432218
Slc39a7	0.188665	0.136043	0.608	0.537	0.328235
Thoc7	0.51887	0.136016	0.878	0.807	0.598052
Hoxc8	0.240694	0.136003	0.447	0.373	0.381099
Adprh	0.340801	0.135815	0.731	0.672	0.459439
Pmepa1	0.705482	0.135805	0.542	0.389	0.752184
Gm48898	0.277525	0.135775	0.294	0.184	0.410548
Rsl1d1	0.32947	0.135772	0.772	0.705	0.449647
Eif4e2	0.528648	0.135767	0.822	0.799	0.604737
Prpf31	0.090863	0.135707	0.461	0.328	0.213233
Rps13	0.164805	0.135621	0.997	1	0.302039
Virma	0.107823	0.135528	0.378	0.307	0.238171
Ndufa12	0.53879	0.135447	0.847	0.861	0.612021
Srm	0.313566	0.135445	0.55	0.443	0.43527
Ctxn1	0.275791	0.135434	0.711	0.566	0.409289
Gmnn	0.309339	0.13537	0.233	0.119	0.43246
Tomm7	0.695285	0.13535	0.928	0.865	0.744577
Ap4s1	0.14866	0.135313	0.306	0.18	0.285128
Tmpo	0.268372	0.135313	0.589	0.508	0.403637
Dnlz	0.164062	0.135294	0.558	0.471	0.301131
Ppdpf	0.498921	0.135267	0.856	0.791	0.58084
Mak16	0.123395	0.135262	0.336	0.238	0.257594
Tgfb1i1	0.666674	0.135152	0.853	0.807	0.720281
Hdhd2	0.0874098	0.135135	0.481	0.377	0.207396
Rnf216	0.0947749	0.134977	0.417	0.283	0.218891
Slc25a17	0.113264	0.134894	0.519	0.422	0.245908
Psmd11	0.382961	0.134886	0.789	0.709	0.486419
Sema6d	0.480506	0.134849	0.172	0.102	0.564923
Smco4	0.173398	0.134829	0.597	0.566	0.310991
Rnf167	0.20029	0.13482	0.278	0.164	0.340872
Ndel1	0.0951441	0.134769	0.378	0.279	0.219536
Vta1	0.0989986	0.134748	0.433	0.336	0.225858
Fzd2	0.396617	0.134728	0.861	0.791	0.497334
Morf4l1	0.968534	0.134728	0.989	0.988	0.977375
Mars	0.148295	0.134689	0.3	0.201	0.285128
Ybx3	0.456027	0.134652	0.817	0.779	0.545259
Gjc1	0.298402	0.134599	0.731	0.648	0.42514
Mitd1	0.129122	0.134548	0.356	0.225	0.26433
Ralbp1	0.411054	0.134439	0.767	0.713	0.507712
Tead1	0.434425	0.134257	0.819	0.742	0.526944
Ssbp3	0.381025	0.134248	0.756	0.689	0.485291
Ttc19	0.118882	0.134217	0.519	0.434	0.252947
Polr2h	0.106407	0.134213	0.517	0.393	0.237196
Mmp14	0.39932	0.134188	0.792	0.75	0.498002
Abhd16a	0.106239	0.134105	0.464	0.377	0.237041
Gapdh	0.391264	0.134077	0.992	1	0.493033
Emid1	0.225177	0.133922	0.444	0.357	0.364115
Atxn10	0.645251	0.133917	0.906	0.861	0.699934
Lsm7	0.350342	0.133893	0.719	0.652	0.465337
Airn	0.141307	0.133887	0.403	0.316	0.278943
Sri	0.632597	0.133848	0.906	0.852	0.689788
Sdhaf2	0.136257	0.133843	0.353	0.238	0.272738
Cmc2	0.17214	0.133843	0.342	0.246	0.309757
Nrk	0.362667	0.133791	0.222	0.119	0.472166
Fh1	0.160347	0.133781	0.561	0.48	0.297717
Pfn2	0.600984	0.133769	0.853	0.811	0.661654
Gcsh	0.129244	0.133736	0.5	0.426	0.264358
Cnpy3	0.114012	0.133732	0.364	0.25	0.246907
Cdc42bpa	0.0832933	0.133684	0.461	0.352	0.201361
Zfp644	0.43795	0.133606	0.781	0.689	0.529851
Arpc1a	0.54749	0.133537	0.864	0.844	0.618521
Egflam	0.110087	0.133473	0.35	0.225	0.241854
Flywch1	0.0970873	0.133409	0.411	0.291	0.222752
Rad54l2	0.278209	0.133376	0.247	0.123	0.410996
Rsbn1l	0.233088	0.133254	0.611	0.578	0.371962
F11r	0.38921	0.133254	0.228	0.119	0.491714
Tor1aip1	0.118985	0.133147	0.372	0.242	0.252947
Atp5f1	0.980091	0.133131	0.972	0.959	0.985766
Gart	0.147738	0.133085	0.319	0.213	0.284706
Anp32e	0.223859	0.133063	0.606	0.508	0.363191
Ralb	0.126649	0.132768	0.531	0.41	0.261246
Gatd1	0.131977	0.132768	0.508	0.414	0.265936
Tcf3	0.243141	0.132631	0.656	0.578	0.383475
Qdpr	0.151238	0.13259	0.558	0.488	0.287802
Polr3h	0.205633	0.132571	0.308	0.197	0.346492
Sh3bgrl	0.693319	0.132493	0.858	0.795	0.743453
Rwdd1	0.545227	0.132451	0.839	0.783	0.61674
Pls3	0.150765	0.13244	0.528	0.422	0.287774
Psmc1	0.289938	0.132361	0.706	0.643	0.41964
Ube2r2	0.587069	0.132281	0.881	0.857	0.652239
Cdk1	0.205914	0.132265	0.353	0.25	0.346492
Myef2	0.129767	0.132191	0.442	0.369	0.26476
Ethe1	0.141199	0.132171	0.383	0.299	0.278943
Hnrnpa1	0.883959	0.132143	0.978	0.988	0.89987
Olfm1	0.137898	0.132108	0.469	0.361	0.274734
Fam111a	0.382705	0.13202	0.197	0.107	0.486419
Psmd5	0.13585	0.13184	0.336	0.213	0.272414
Bola2	0.335068	0.131684	0.689	0.607	0.454228
2310022B05Rik	0.221274	0.131658	0.642	0.545	0.360924
Loxl2	0.517904	0.131599	0.717	0.627	0.597506
Srp14	0.78489	0.131446	0.903	0.893	0.817496
Cd320	0.109468	0.131425	0.408	0.287	0.240726
Zfp266	0.229401	0.13141	0.658	0.537	0.368011
Plekhg2	0.123626	0.131341	0.403	0.311	0.257721
Csrp1	0.889531	0.131314	0.944	0.947	0.904785
Cox7a2l	0.98868	0.13124	0.986	0.988	0.991943
Coro1c	0.12186	0.131106	0.369	0.283	0.255921
Zbtb12	0.129092	0.131106	0.369	0.275	0.26433
Nsfl1c	0.31579	0.13094	0.703	0.652	0.437109
Atp5d	0.77279	0.130924	0.989	0.996	0.808766
Snx18	0.398723	0.130894	0.772	0.676	0.49779
Sirt2	0.18892	0.130875	0.592	0.508	0.328416
Smc4	0.486537	0.130875	0.481	0.467	0.57107
Rbp4	0.708853	0.130838	0.111	0.049	0.754456
Trnt1	0.129996	0.130779	0.397	0.307	0.26493
1110032A03Rik	0.207218	0.130755	0.283	0.189	0.347618
Topbp1	0.324166	0.130755	0.253	0.176	0.444971
Cenpb	0.321878	0.130731	0.706	0.627	0.442765
Lrrc42	0.119854	0.130715	0.461	0.361	0.253685
Commd3	0.56119	0.1307	0.842	0.775	0.630109
Ehmt2	0.128157	0.13066	0.508	0.422	0.263175
Prrc2c	0.688634	0.130649	0.933	0.93	0.739734
Fndc3b	0.114597	0.130643	0.464	0.357	0.247073
Ddx39	0.144235	0.130602	0.358	0.283	0.281343
Srp72	0.450631	0.13059	0.786	0.709	0.540669
Atp2c1	0.134258	0.130521	0.369	0.27	0.27007
Cct7	0.788526	0.130479	0.917	0.914	0.820229
Leo1	0.131765	0.130432	0.483	0.377	0.265936
Fundc2	0.603802	0.130347	0.872	0.803	0.663555
Rtraf	0.9775	0.130346	0.981	0.947	0.983566
Hddc2	0.169546	0.130333	0.531	0.455	0.306704
Fcf1	0.127821	0.130329	0.467	0.357	0.263106
Naa38	0.209133	0.13027	0.542	0.475	0.350055
Grn	0.301845	0.130154	0.642	0.648	0.427468
Eif3d	0.530023	0.130123	0.775	0.779	0.605456
Ccdc32	0.147116	0.130084	0.361	0.258	0.284288
Egln2	0.160373	0.130041	0.525	0.422	0.297717
Tyms	0.278846	0.129996	0.383	0.279	0.411029
Tpt1	0.209752	0.129953	1	1	0.350354
Prkag1	0.145815	0.129932	0.383	0.262	0.283475
Etl4	0.147078	0.129858	0.503	0.447	0.284288
0610037L13Rik	0.16716	0.129858	0.547	0.467	0.304552
Purb	0.841249	0.129836	0.961	0.918	0.862528
Atad2	0.311062	0.129785	0.317	0.262	0.43369
Msh3	0.309586	0.129606	0.247	0.135	0.43246
Ogt	0.566507	0.129553	0.856	0.799	0.634029
mt-Nd2	0.487562	0.1293	1	1	0.571722
B4galt2	0.125575	0.12927	0.389	0.254	0.259693
Hnrnpc	0.783147	0.129241	0.956	0.926	0.81603
Stra6	0.267035	0.129221	0.253	0.197	0.402978
Myl12b	0.707684	0.129216	0.872	0.873	0.753541
Lpin2	0.151919	0.129202	0.361	0.262	0.288817
Trim26	0.132398	0.129187	0.453	0.34	0.266549
Serf1	0.705807	0.129133	0.942	0.889	0.752201
Mlec	0.347591	0.129088	0.717	0.607	0.464728
Gars	0.137801	0.129066	0.45	0.369	0.274734
Pcmt1	0.253867	0.12896	0.631	0.549	0.392413
Zfp945	0.144247	0.128872	0.347	0.258	0.281343
Fasn	0.307724	0.128858	0.258	0.156	0.432092
Exosc8	0.151071	0.128763	0.406	0.361	0.287774
Ndufb3	0.459712	0.128579	0.775	0.754	0.547781
Thyn1	0.165828	0.128568	0.506	0.422	0.303228
Slc25a39	0.244692	0.128534	0.678	0.516	0.384923
Samd5	0.557819	0.128534	0.186	0.098	0.628063
Ccni	0.337276	0.128521	0.658	0.582	0.455951
Zfp131	0.119434	0.128494	0.414	0.295	0.253424
Fmc1	0.12182	0.128494	0.394	0.307	0.255921
Rnf215	0.13605	0.128494	0.394	0.283	0.272548
Parva	0.505838	0.128352	0.778	0.758	0.586368
Acbd6	0.36396	0.128282	0.689	0.623	0.473343
Nop58	0.478057	0.128256	0.739	0.705	0.563565
Mdp1	0.152935	0.12821	0.417	0.348	0.289672
Rgs19	0.264105	0.12812	0.269	0.168	0.40109
Psmd3	0.308616	0.12812	0.678	0.586	0.432347
Ube2b	0.403634	0.128109	0.742	0.664	0.501091
Mydgf	0.331	0.128082	0.669	0.561	0.450723
Ndufb4	0.644624	0.128051	0.842	0.832	0.699611
Gde1	0.206035	0.128047	0.589	0.475	0.346492
Ppil2	0.160977	0.128025	0.508	0.43	0.298168
Cdca7	0.205453	0.128025	0.325	0.242	0.346492
Atp6v0e	0.625547	0.127916	0.869	0.811	0.683744
Capza2	0.576401	0.127914	0.819	0.766	0.642442
Fmnl2	0.164498	0.127807	0.381	0.307	0.301705
Srsf9	0.523724	0.12778	0.883	0.811	0.601652
1110008P14Rik	0.128341	0.127755	0.414	0.316	0.263175
Tmem30a	0.190965	0.127755	0.547	0.484	0.330318
Ddx6	0.348715	0.127721	0.697	0.594	0.46514
Rae1	0.165768	0.127663	0.503	0.393	0.303228
Kdelc1	0.149813	0.127588	0.358	0.246	0.286434
Fbxo3	0.159207	0.127588	0.347	0.246	0.296471
Ei24	0.286907	0.127576	0.689	0.623	0.418571
Cops7a	0.112795	0.127556	0.467	0.336	0.245585
Blcap	0.144649	0.127534	0.356	0.254	0.281654
Acyp2	0.146712	0.127534	0.353	0.25	0.284288
Rer1	0.550966	0.127534	0.842	0.787	0.621209
Rhod	0.137069	0.127529	0.522	0.422	0.273958
Cct4	0.931535	0.127474	0.947	0.943	0.942777
Il6st	0.175456	0.127402	0.511	0.443	0.313734
Nudt5	0.186299	0.127402	0.539	0.459	0.325438
Psenen	0.359933	0.127376	0.692	0.643	0.47189
Podxl2	0.480866	0.127364	0.764	0.717	0.56496
Tex264	0.195076	0.127361	0.553	0.463	0.335046
Tars	0.131699	0.127281	0.408	0.283	0.265936
Ccnt2	0.149676	0.127281	0.494	0.398	0.286434
Rbm22	0.220645	0.127203	0.558	0.471	0.360167
Mthfd2l	0.124552	0.127139	0.425	0.324	0.258643
Ppp4c	0.169631	0.127112	0.5	0.422	0.306704
Znrf1	0.147448	0.127094	0.425	0.311	0.284424
Msantd3	0.137932	0.126972	0.35	0.266	0.274734
Prrc2a	0.241732	0.126912	0.617	0.508	0.381996
Ndufa13	0.816698	0.126899	0.986	0.971	0.842086
Pigyl	0.183537	0.12684	0.569	0.467	0.322758
Atg5	0.152182	0.126831	0.372	0.275	0.288817
Trappc1	0.296736	0.126778	0.592	0.545	0.423903
Orai3	0.288447	0.126673	0.267	0.189	0.418617
Ankrd11	0.705312	0.12664	0.892	0.885	0.752184
Sf3a3	0.204372	0.126629	0.597	0.496	0.346123
Eef2	0.473684	0.126572	0.994	1	0.560954
Rcl1	0.17826	0.12644	0.339	0.221	0.31655
Tial1	0.149047	0.1263	0.481	0.385	0.285645
Snhg18	0.942018	0.126268	0.933	0.918	0.952593
Rrp1	0.684374	0.126163	0.858	0.82	0.735483
2022-03-07	0.274095	0.126136	0.553	0.508	0.407756
Prim1	0.293283	0.126048	0.264	0.16	0.421792
Smarcd1	0.191905	0.125963	0.514	0.447	0.331472
Med21	0.266055	0.125909	0.633	0.541	0.402642
Tra2b	0.589619	0.125833	0.8	0.779	0.653372
Eif4e	0.293126	0.125804	0.611	0.549	0.421792
Bag1	0.806315	0.12577	0.889	0.857	0.83392
Fam58b	0.14851	0.125766	0.358	0.23	0.285128
Zfp428	0.16724	0.125729	0.456	0.373	0.304552
Gna13	0.168292	0.125729	0.344	0.25	0.305437
Gm16152	0.424832	0.1256	0.214	0.074	0.520499
Ptprs	0.520756	0.125593	0.797	0.73	0.599652
D630033O11Rik	0.223805	0.12552	0.339	0.246	0.363191
Actr3	0.702356	0.12552	0.911	0.836	0.750166
Supt20	0.177899	0.125464	0.553	0.447	0.31655
Dnajc2	0.18356	0.125464	0.539	0.406	0.322758
P3h1	0.212601	0.125437	0.528	0.418	0.353173
Foxd1	0.581615	0.125405	0.167	0.094	0.647363
Zdhhc16	0.193934	0.125263	0.311	0.205	0.334138
Sf1	0.162267	0.12519	0.45	0.381	0.300101
Fli1	0.239626	0.125163	0.294	0.205	0.38015
Rnase4	0.24017	0.125163	0.286	0.197	0.380575
Tprgl	0.373068	0.125123	0.656	0.602	0.479799
Cox6c	0.771071	0.125071	0.994	0.992	0.807947
Sptlc2	0.140177	0.125069	0.378	0.23	0.27784
Zfp422	0.156761	0.125034	0.547	0.418	0.293716
Map1lc3b	0.787649	0.12501	0.911	0.857	0.819667
Chrac1	0.30134	0.124949	0.628	0.561	0.427468
Chchd3	0.205775	0.124916	0.528	0.455	0.346492
Ctps	0.143869	0.124897	0.392	0.275	0.281343
Commd9	0.125112	0.12487	0.422	0.295	0.259398
Pard6g	0.173354	0.12487	0.367	0.316	0.310991
Fermt2	0.975078	0.124862	0.925	0.918	0.981662
Sh3glb1	0.721065	0.124858	0.878	0.865	0.765443
Plekhj1	0.251224	0.124743	0.581	0.496	0.391505
Siva1	0.919963	0.124673	0.889	0.865	0.932618
Col11a1	0.152567	0.124648	0.442	0.336	0.2892
Rraga	0.350126	0.124626	0.703	0.631	0.465304
H13	0.413813	0.124626	0.717	0.627	0.509542
Stx8	0.166144	0.124539	0.508	0.402	0.303578
Ncald	0.30298	0.124501	0.511	0.459	0.427902
Epha7	0.255428	0.124492	0.269	0.193	0.394414
Cul1	0.302201	0.124418	0.689	0.566	0.427546
Bnip2	0.360995	0.124387	0.625	0.582	0.472001
Cacnb3	0.177817	0.124371	0.35	0.275	0.31655
Armcx2	0.232715	0.124362	0.531	0.463	0.371932
Dmac1	0.225798	0.124326	0.547	0.48	0.364704
Sec61a2	0.143102	0.124304	0.422	0.291	0.281343
Cdc123	0.256152	0.124291	0.589	0.496	0.394779
Dync1li1	0.148609	0.12424	0.419	0.324	0.285128
Ccm2	0.13486	0.124219	0.425	0.32	0.271058
Arpc4	0.269962	0.124207	0.594	0.512	0.405277
Cyth3	0.524475	0.124179	0.808	0.734	0.601945
Zmat5	0.156509	0.124141	0.458	0.352	0.293469
Dazap1	0.404081	0.124134	0.7	0.619	0.50139
Timm50	0.190791	0.124085	0.444	0.361	0.330251
Rnf219	0.499908	0.124085	0.217	0.102	0.581711
Snrnp35	0.431808	0.124061	0.225	0.115	0.52542
Tsen34	0.570333	0.124015	0.825	0.742	0.636846
Iws1	0.18355	0.123998	0.492	0.393	0.322758
Maea	0.218426	0.12395	0.511	0.443	0.35877
As3mt	0.258748	0.123929	0.281	0.172	0.396682
Mcts2	0.215483	0.123888	0.314	0.209	0.355217
Polr2l	0.26773	0.123888	0.294	0.197	0.403419
Rps27a	0.00852127	0.123849	0.997	1	0.0412823
Polr2j	0.430171	0.123754	0.736	0.643	0.5244
R3hdm4	0.263003	0.123736	0.619	0.529	0.400265
Ogfr	0.271141	0.123698	0.619	0.537	0.405794
Triap1	0.154997	0.12369	0.4	0.32	0.291759
Ncor2	0.147475	0.123674	0.403	0.287	0.284424
Chmp1a	0.152246	0.123528	0.497	0.381	0.288817
Col9a1	0.730638	0.123463	0.114	0.029	0.773579
Hmga2	0.359177	0.123439	0.394	0.324	0.471316
Exosc7	0.199595	0.123427	0.528	0.434	0.339927
Emc4	0.214544	0.123404	0.539	0.455	0.354947
Cop1	0.183929	0.123338	0.567	0.471	0.322971
Eif3b	0.26685	0.123338	0.553	0.471	0.402978
Cntln	0.201589	0.123328	0.544	0.439	0.342602
Hmgcr	0.29369	0.123297	0.258	0.152	0.421886
Ing1	0.27936	0.123278	0.572	0.496	0.411261
Trappc3	0.283697	0.123259	0.617	0.508	0.415633
Ube2e3	0.750334	0.123251	0.858	0.836	0.789962
Eefsec	0.270729	0.123227	0.292	0.209	0.405597
Gata2	0.383015	0.1232	0.239	0.156	0.486419
Tmem121	0.237767	0.123163	0.317	0.246	0.377941
Nsmce1	0.35479	0.123131	0.636	0.574	0.467439
Ppp6r3	0.171499	0.123105	0.378	0.295	0.309182
Smim8	0.173601	0.123094	0.378	0.287	0.311125
Pex19	0.155218	0.123083	0.425	0.316	0.291949
C1qtnf6	0.150935	0.123032	0.436	0.34	0.287774
Mrpl38	0.160611	0.123013	0.483	0.365	0.297717
Rsl24d1	0.160577	0.122967	0.508	0.406	0.297717
Rps17	0.292508	0.122923	0.997	0.996	0.421686
Zdhhc20	0.230528	0.122918	0.522	0.434	0.369087
Rheb	0.629161	0.122803	0.806	0.734	0.687076
Zcchc17	0.265589	0.122798	0.589	0.504	0.40233
Snrnp70	0.873766	0.12278	0.931	0.873	0.890612
Sf3b2	0.996991	0.122719	0.911	0.91	0.997022
Rpl6	0.0140133	0.122644	1	1	0.0592701
Gps1	0.536143	0.122632	0.703	0.693	0.609584
Snhg11	0.560151	0.122612	0.158	0.119	0.629232
Casp8	0.313336	0.122604	0.261	0.139	0.435217
Rps24	0.00199141	0.122596	1	1	0.0138771
Rps6	0.256357	0.122535	0.997	1	0.394846
Ubap2	0.185561	0.122511	0.364	0.258	0.324441
Slc29a1	0.182945	0.122478	0.392	0.328	0.322641
Fam168b	0.166809	0.122463	0.433	0.344	0.304335
Sdhaf4	0.168883	0.122463	0.431	0.348	0.306053
Tns3	0.181943	0.122453	0.433	0.373	0.321339
Orc6	0.25101	0.122448	0.414	0.352	0.391505
Nelfb	0.170431	0.122439	0.492	0.393	0.307713
Hoxc6	0.283036	0.122393	0.5	0.41	0.415165
Crym	0.768633	0.122348	0.247	0.184	0.805739
Ahsa1	0.302979	0.122333	0.622	0.57	0.427902
Vasp	0.457544	0.122251	0.717	0.66	0.546267
Rpl32	0.00698921	0.122031	1	1	0.0362425
Uvrag	0.155744	0.12189	0.4	0.295	0.292713
Cd151	0.155992	0.12189	0.45	0.316	0.292951
Kars	0.157339	0.12189	0.414	0.291	0.294345
Snapin	0.157931	0.12189	0.375	0.254	0.295225
Nfx1	0.158152	0.12189	0.453	0.357	0.295302
Gsdme	0.159445	0.12189	0.369	0.258	0.296688
Clint1	0.165526	0.12189	0.486	0.406	0.303131
Dtnbp1	0.175406	0.12189	0.475	0.406	0.313734
Igdcc4	0.178149	0.12189	0.378	0.266	0.31655
Zfc3h1	0.17832	0.12189	0.308	0.205	0.31655
Prrc1	0.18089	0.12189	0.403	0.287	0.320161
Ccdc86	0.195421	0.12189	0.333	0.23	0.335401
Nav2	0.209738	0.12189	0.511	0.418	0.350354
Dld	0.249296	0.12189	0.539	0.471	0.390146
Mrpl48	0.301856	0.12189	0.578	0.492	0.427468
Acbd3	0.318867	0.12189	0.669	0.602	0.440366
Pgp	0.324397	0.12189	0.533	0.504	0.444971
Pten	0.342604	0.12189	0.603	0.52	0.460926
Pitrm1	0.3973	0.12189	0.603	0.541	0.497546
Nudt21	0.52291	0.12189	0.711	0.684	0.601569
Col6a3	0.567134	0.12189	0.747	0.676	0.634439
Nop10	0.646357	0.12189	0.789	0.725	0.700821
Nedd4	0.540036	0.121632	1	1	0.612773
Aebp1	0.760449	0.121575	0.747	0.709	0.798192
Srp19	0.603589	0.121554	0.761	0.713	0.663555
Ssb	0.984593	0.121508	0.953	0.922	0.989066
Cfap36	0.504898	0.121467	0.597	0.557	0.585836
Cdk7	0.258855	0.121405	0.542	0.488	0.396682
Wdr82	0.206591	0.121282	0.367	0.299	0.346982
Prkaca	0.178608	0.121265	0.372	0.27	0.3166
Ltv1	0.185566	0.121265	0.378	0.254	0.324441
Pdcd7	0.163506	0.121259	0.389	0.258	0.300875
Ireb2	0.211654	0.121234	0.322	0.217	0.352607
Rftn1	0.435328	0.121154	0.217	0.111	0.527775
Gm16141	0.541058	0.121129	0.186	0.074	0.613255
Bmp1	0.396143	0.121073	0.65	0.582	0.497121
Tln1	0.992276	0.120987	0.911	0.865	0.99391
Rtn3	0.338495	0.120984	0.608	0.512	0.45709
Ube2e1	0.264089	0.120939	0.592	0.512	0.40109
Pgls	0.975204	0.120868	0.919	0.91	0.981662
Fus	0.924339	0.120861	0.956	0.959	0.936274
Raf1	0.184277	0.120743	0.428	0.348	0.323349
Gfer	0.174051	0.120723	0.403	0.357	0.311702
Rnf5	0.195685	0.120635	0.367	0.266	0.335618
Gtf2ird1	0.217874	0.120635	0.336	0.246	0.358262
Bcl2l12	0.196907	0.120623	0.358	0.27	0.337238
Thoc1	0.178081	0.120611	0.367	0.242	0.31655
Jam3	0.293451	0.120556	0.639	0.566	0.421792
B230118H07Rik	0.262891	0.120538	0.628	0.529	0.400265
Emc10	0.599522	0.120512	0.775	0.725	0.661255
Eny2	0.773427	0.120466	0.856	0.779	0.809022
Med8	0.197662	0.120276	0.494	0.422	0.33788
Tsc22d1	0.984011	0.120249	0.922	0.889	0.98889
Myg1	0.188515	0.120134	0.411	0.332	0.328235
Chmp6	0.181024	0.120118	0.408	0.34	0.320161
Flnc	0.17666	0.120036	0.375	0.262	0.315215
Polr2i	0.485164	0.119896	0.689	0.648	0.569734
Serinc2	0.26974	0.119888	0.278	0.193	0.405277
Golt1b	0.278233	0.119868	0.275	0.189	0.410996
Col8a2	0.320029	0.119847	0.275	0.16	0.441469
Tlnrd1	0.295263	0.119804	0.269	0.172	0.423396
Grk2	0.371657	0.119782	0.267	0.143	0.47873
Ftsj1	0.508507	0.119665	0.217	0.09	0.58877
Gspt1	0.775424	0.11964	0.758	0.734	0.81008
Qrsl1	0.559855	0.119615	0.186	0.078	0.629208
Nectin2	0.431282	0.119588	0.703	0.59	0.525227
Gm10073	0.172005	0.119562	0.453	0.32	0.309757
Usp14	0.315182	0.119562	0.578	0.488	0.436765
Mageh1	0.317232	0.119512	0.55	0.475	0.438606
Auts2	0.96385	0.119387	0.875	0.836	0.973052
Cggbp1	0.388308	0.119355	0.614	0.578	0.490834
Rai14	0.224963	0.119309	0.5	0.41	0.364012
Yrdc	0.21977	0.119263	0.333	0.23	0.359558
Timp1	0.297646	0.119263	0.289	0.201	0.424311
Dhx29	0.236786	0.119237	0.317	0.201	0.376627
Slc25a1	0.249906	0.119237	0.303	0.217	0.390655
Dnmt3a	0.36934	0.119214	0.697	0.57	0.476517
Islr	0.565015	0.119142	0.733	0.701	0.632942
Cd302	0.320382	0.119127	0.592	0.516	0.441705
Pja2	0.467857	0.119069	0.7	0.549	0.556124
Psmc6	0.78083	0.119008	0.85	0.84	0.814663
Eif4ebp1	0.633935	0.118983	0.783	0.738	0.69043
Gusb	0.181143	0.11897	0.431	0.336	0.320161
Adgrl3	0.27177	0.118944	0.522	0.459	0.406236
Arl4a	0.591077	0.118944	0.789	0.807	0.654301
Rbbp4	0.69443	0.118931	0.844	0.791	0.743989
Obsl1	0.185229	0.118918	0.403	0.303	0.324441
Chaf1a	0.533062	0.118911	0.189	0.082	0.607786
Sfxn2	0.604869	0.118843	0.181	0.078	0.664427
Zfp30	0.261074	0.118832	0.528	0.459	0.398577
Ctdnep1	0.276169	0.118784	0.481	0.41	0.409289
Fam204a	0.205909	0.118735	0.503	0.443	0.346492
Prkar1a	0.910882	0.118683	0.869	0.865	0.924954
Plxna3	0.745376	0.118659	0.125	0.016	0.785763
Zfp664	0.201408	0.118632	0.494	0.398	0.342534
Plaa	0.20591	0.118627	0.333	0.23	0.346492
Gm17018	0.213829	0.118606	0.464	0.365	0.354005
Clk3	0.270526	0.118595	0.306	0.221	0.405597
Sh3pxd2a	0.208178	0.118551	0.439	0.357	0.348924
Ppp3ca	0.97062	0.118436	0.817	0.82	0.978668
Notch1	0.401755	0.11835	0.253	0.123	0.499779
Suclg1	0.693854	0.118347	0.811	0.775	0.743699
Mpnd	0.311462	0.118339	0.483	0.426	0.433792
Trp53	0.396744	0.118288	0.578	0.553	0.497334
Ankmy2	0.212152	0.11828	0.378	0.32	0.35291
Plgrkt	0.326087	0.118239	0.619	0.537	0.44638
Srprb	0.189467	0.118073	0.353	0.246	0.328767
Eng	0.285185	0.118073	0.306	0.238	0.416809
Hoxd10	0.449599	0.11807	0.733	0.652	0.540373
Smpd1	0.259489	0.117882	0.303	0.205	0.397399
Pet100	0.360288	0.117855	0.644	0.578	0.47197
Emp2	0.163281	0.117847	0.383	0.295	0.300832
Smarca2	0.468535	0.117833	0.642	0.627	0.556657
Unc119	0.253069	0.117789	0.514	0.43	0.392413
Hoxa5	0.334795	0.117714	0.264	0.164	0.454228
Smim10l1	0.475739	0.11765	0.717	0.639	0.561983
Frem1	0.67817	0.117603	0.706	0.693	0.730106
Vamp3	0.215221	0.117591	0.475	0.418	0.355217
Derl2	0.207256	0.117586	0.35	0.291	0.347618
Ctnnb1	0.803722	0.117579	0.922	0.848	0.832427
Hspa4	0.471658	0.117509	0.731	0.652	0.559548
Knop1	0.644666	0.117485	0.728	0.635	0.699611
Chordc1	0.205053	0.117485	0.467	0.369	0.346492
C1qbp	0.712122	0.117485	0.783	0.766	0.757272
Zfp536	0.374022	0.117455	0.583	0.496	0.480011
Pin4	0.382221	0.117455	0.633	0.52	0.486419
Isca2	0.211908	0.117411	0.447	0.373	0.352745
Mtdh	0.997022	0.117378	0.922	0.926	0.997022
Emc8	0.36518	0.117334	0.594	0.553	0.473948
Usp1	0.253329	0.117299	0.483	0.381	0.392413
Gpr180	0.183675	0.117255	0.447	0.299	0.322758
Fign	0.430083	0.117228	0.431	0.398	0.5244
Eya4	0.362394	0.1171	0.261	0.18	0.472166
Mprip	0.831895	0.117083	0.831	0.799	0.855101
Bdp1	0.22264	0.117044	0.381	0.283	0.362182
Irak1	0.243576	0.117044	0.361	0.299	0.383913
Hook3	0.496544	0.11703	0.683	0.639	0.579182
Tnrc6b	0.541389	0.116972	0.719	0.672	0.613255
Ergic3	0.833357	0.116898	0.85	0.816	0.85588
Rp9	0.91925	0.116864	0.872	0.828	0.932284
Peak1	0.396926	0.116799	0.681	0.615	0.497334
Cuta	0.494482	0.116769	0.672	0.652	0.577331
Eef1d	0.597511	0.116718	0.964	0.98	0.659921
Pdxdc1	0.194482	0.116654	0.489	0.41	0.334367
Chd8	0.251119	0.116654	0.5	0.393	0.391505
Numa1	0.263827	0.116654	0.489	0.414	0.40109
Safb	0.32534	0.116433	0.592	0.5	0.446013
Mrpl58	0.53379	0.116427	0.694	0.668	0.608331
Psmd4	0.806488	0.116383	0.842	0.783	0.83392
Dvl3	0.199053	0.11637	0.369	0.283	0.339308
Mrpl22	0.228125	0.11635	0.475	0.361	0.36701
Prkar2a	0.380428	0.116338	0.253	0.152	0.485291
Zfp706	0.636397	0.116309	0.753	0.693	0.6928
0610009B22Rik	0.209141	0.116303	0.45	0.357	0.350055
Pole3	0.21168	0.116303	0.456	0.352	0.352607
Elovl6	0.439044	0.11628	0.228	0.148	0.530693
Gapvd1	0.230003	0.116256	0.433	0.352	0.36849
Myo1b	0.764092	0.11625	0.7	0.668	0.80167
Osr1	0.537698	0.11622	0.183	0.127	0.611066
Nudt14	0.224651	0.116159	0.347	0.262	0.36375
Nans	0.253888	0.116159	0.517	0.41	0.392413
Cdc42ep5	0.432022	0.116159	0.683	0.602	0.52542
Ndfip2	0.228567	0.116068	0.503	0.402	0.367156
Jarid2	0.252137	0.116059	0.392	0.295	0.391579
Rbfox2	0.786836	0.116027	0.836	0.77	0.819172
Kpna3	0.286524	0.11599	0.306	0.221	0.418263
Commd7	0.300673	0.115946	0.561	0.455	0.427124
Emp1	0.267081	0.115926	0.461	0.361	0.402978
Glyr1	0.365628	0.115881	0.572	0.508	0.473991
Ywhag	0.239567	0.115877	0.444	0.373	0.38015
Arl16	0.35562	0.115811	0.269	0.193	0.468002
Rsrp1	0.879755	0.115753	0.919	0.873	0.89634
Eif3e	0.610357	0.1157	0.975	0.98	0.669548
Nol7	0.591669	0.115655	0.722	0.676	0.654658
Nktr	0.850839	0.115647	0.825	0.795	0.87016
Diablo	0.247758	0.115571	0.519	0.422	0.388239
Commd1	0.796715	0.115564	0.85	0.758	0.826979
Kctd2	0.224214	0.115561	0.369	0.25	0.363526
Abce1	0.204955	0.11552	0.508	0.385	0.346492
Gas6	0.792061	0.115454	0.817	0.803	0.823202
Polr2c	0.640112	0.115452	0.742	0.73	0.6956
Sap30bp	0.252242	0.115438	0.328	0.242	0.391579
Naxe	0.571248	0.115405	0.733	0.643	0.637574
Eif2b2	0.221967	0.115398	0.414	0.291	0.36157
Smarcd2	0.227836	0.115398	0.408	0.311	0.36701
Pdgfrb	0.629774	0.115375	0.531	0.475	0.687437
4932438A13Rik	0.189528	0.11534	0.425	0.303	0.328767
Plscr3	0.432757	0.115332	0.644	0.59	0.525444
Ormdl1	0.539537	0.115201	0.192	0.107	0.612584
Bptf	0.866212	0.115191	0.814	0.754	0.883282
Rbm8a	0.819747	0.115122	0.822	0.791	0.844756
Pold2	0.22821	0.115034	0.364	0.279	0.36701
Ubap2l	0.739612	0.115031	0.806	0.82	0.781041
Tmcc1	0.25006	0.115029	0.411	0.348	0.390655
Pcbp2	0.954836	0.115022	0.881	0.852	0.964353
Hnrnpul2	0.3002	0.115014	0.614	0.496	0.426951
Tpbg	0.548348	0.114823	0.167	0.127	0.619119
Sdhd	0.357051	0.114772	0.561	0.484	0.469378
Pnisr	0.970264	0.114737	0.933	0.906	0.978668
Rbm27	0.222915	0.114721	0.386	0.324	0.362385
Ppid	0.414003	0.114706	0.681	0.582	0.509542
Rictor	0.29009	0.114698	0.314	0.209	0.41964
2810001G20Rik	0.440137	0.11467	0.25	0.127	0.53175
Fbn2	0.860247	0.114571	0.692	0.68	0.877957
Eif4ebp2	0.282289	0.11456	0.411	0.344	0.414319
Pgd	0.228278	0.114523	0.386	0.275	0.36701
Ttyh3	0.301762	0.114523	0.353	0.275	0.427468
Minpp1	0.197699	0.114497	0.447	0.34	0.33788
Tbca	0.814328	0.114492	0.942	0.943	0.84024
Tgm5	0.412066	0.11448	0.225	0.156	0.508444
Mpc1	0.697883	0.114394	0.783	0.766	0.746373
Tmed1	0.366932	0.114385	0.592	0.488	0.475194
Ubxn4	0.881457	0.114357	0.769	0.742	0.897698
Nek9	0.329116	0.114327	0.275	0.172	0.449416
Magohb	0.222351	0.114303	0.394	0.336	0.361954
Ddah1	0.288488	0.114303	0.386	0.287	0.418617
Prc1	0.842458	0.114256	0.108	0.066	0.863041
Adk	0.225923	0.114168	0.425	0.316	0.364704
Fzr1	0.232625	0.114168	0.35	0.246	0.371932
Ppp2r5d	0.273559	0.114168	0.342	0.225	0.407656
Nfia	0.529377	0.114125	0.711	0.615	0.605002
Btbd7	0.43813	0.114118	0.664	0.598	0.529851
Vamp4	0.224426	0.114028	0.389	0.299	0.363627
Mapk1ip1l	0.233088	0.114028	0.381	0.303	0.371962
Npm3	0.530842	0.113985	0.692	0.631	0.606107
Zfp318	0.215409	0.113971	0.458	0.336	0.355217
Dnttip1	0.297185	0.113817	0.536	0.426	0.423903
Bclaf1	0.637532	0.113753	0.783	0.725	0.693556
Yif1a	0.398719	0.113693	0.614	0.516	0.49779
Tsnax	0.30793	0.113663	0.561	0.467	0.432132
Pygo1	0.476572	0.113608	0.242	0.16	0.56236
Srsf11	0.848685	0.113575	0.911	0.922	0.868322
Upf3a	0.382499	0.113522	0.606	0.516	0.486419
Akirin2	0.502466	0.113457	0.7	0.643	0.583937
Sdc1	0.379677	0.113433	0.256	0.148	0.485291
Rfc3	0.362909	0.113366	0.431	0.414	0.472229
Rpa2	0.513547	0.113343	0.219	0.127	0.593042
Zfp62	0.262751	0.113317	0.358	0.287	0.400265
Trmt10a	0.33496	0.113243	0.289	0.176	0.454228
Mrps17	0.605949	0.113206	0.744	0.709	0.665013
Cops5	0.750272	0.113198	0.825	0.787	0.789962
Dbt	0.315567	0.113156	0.286	0.209	0.43705
Cdca4	0.565303	0.112961	0.2	0.094	0.632973
Csde1	0.822054	0.112961	0.836	0.82	0.846774
Ddx54	0.2587	0.112949	0.492	0.43	0.396682
Naa50	0.36112	0.112894	0.528	0.426	0.472001
Atxn2	0.319621	0.112826	0.528	0.434	0.441157
Igf2	0.284988	0.112817	0.319	0.221	0.416772
Tnks2	0.418287	0.112799	0.592	0.537	0.514294
Cyp51	0.447672	0.112789	0.25	0.139	0.538713
Kansl3	0.260239	0.112727	0.333	0.205	0.397551
Adgra2	0.214993	0.112705	0.433	0.344	0.355217
Wsb2	0.244972	0.112705	0.428	0.328	0.385114
Bmyc	0.429808	0.112697	0.65	0.537	0.5244
Rab2a	0.949522	0.112673	0.906	0.881	0.959384
Ubl4a	0.26567	0.112658	0.467	0.406	0.40233
Pgap2	0.24433	0.112625	0.414	0.328	0.384603
Morc2a	0.404495	0.112594	0.242	0.143	0.501648
Pfdn4	0.317755	0.112544	0.519	0.439	0.43908
Rangap1	0.568304	0.112493	0.2	0.127	0.635165
Smu1	0.405421	0.112478	0.572	0.525	0.50254
Dars	0.219474	0.112461	0.417	0.299	0.359558
Haus7	0.269896	0.112411	0.331	0.242	0.405277
Asap1	0.352046	0.112343	0.569	0.475	0.466073
Yy1	0.619809	0.112302	0.692	0.643	0.678692
Sdc3	0.372668	0.112255	0.275	0.18	0.479538
Fam53a	0.281396	0.112228	0.328	0.238	0.413257
Ogdh	0.301969	0.112228	0.319	0.234	0.427468
Zfp106	0.472656	0.112158	0.647	0.594	0.560458
Golga7	0.598903	0.112123	0.728	0.689	0.661159
Stk11	0.2464	0.1121	0.422	0.32	0.38636
Fip1l1	0.666354	0.112086	0.775	0.693	0.720255
Nbas	0.525801	0.112067	0.206	0.09	0.602615
Tmem216	0.419092	0.112051	0.261	0.152	0.515024
Ptp4a3	0.653561	0.112051	0.214	0.164	0.708315
Stau1	0.251349	0.112025	0.369	0.299	0.391505
Ccdc25	0.289966	0.112025	0.364	0.266	0.41964
Snf8	0.525763	0.112025	0.692	0.635	0.602615
Fam213a	0.427719	0.111908	0.578	0.508	0.522933
Ghr	0.216657	0.111839	0.428	0.385	0.356502
Hspb11	0.479969	0.111776	0.633	0.561	0.564724
Csnk2a1	0.218478	0.111755	0.447	0.361	0.35877
Snap23	0.285604	0.111607	0.542	0.451	0.41717
Akirin1	0.24638	0.111565	0.381	0.266	0.38636
Trmt1	0.255883	0.111565	0.383	0.283	0.394615
Pcbd2	0.324291	0.111542	0.564	0.467	0.444971
Meis2	0.475791	0.11143	0.939	0.951	0.561983
Vwc2	0.479072	0.111343	0.217	0.152	0.563942
Rab1b	0.280239	0.111308	0.389	0.332	0.412056
Nt5c	0.343041	0.111275	0.319	0.279	0.460926
Btbd2	0.270336	0.111248	0.45	0.377	0.405587
Gm7324	0.832582	0.111221	0.106	0.004	0.855445
Ensa	0.246135	0.111158	0.469	0.381	0.38636
Cib2	0.371843	0.11113	0.281	0.197	0.47873
Atg101	0.339695	0.111118	0.372	0.303	0.458203
Ddrgk1	0.669544	0.111111	0.708	0.631	0.722419
Tm2d1	0.335009	0.1111	0.569	0.467	0.454228
1700020I14Rik	0.391194	0.11102	0.606	0.537	0.493033
Kat7	0.399249	0.11102	0.278	0.201	0.498002
2022-09-03	0.699005	0.11102	0.142	0.057	0.747244
Tmco1	0.842285	0.11102	0.831	0.775	0.863041
Mrpl28	0.546836	0.110987	0.717	0.578	0.618273
Npm1	0.0322695	0.110938	0.997	1	0.106557
Prrx1	0.307253	0.110931	0.378	0.32	0.431908
[truncated: 437 more rows]

## Sheet: Stroma_cluster3.MutVsCTRL.DEGs
Gene	p_val	avg_logFC	pct.1	pct.2	p_val_adj
Gm10260	3.32e-37	1.48016	0.545	0.02	6.76e-34
Hist1h2ap	0.00116275	0.845243	0.597	0.371	0.0232209
Uba52	3.52e-27	0.68694	0.974	0.926	4.78e-24
Pdia6	3.38e-14	0.633161	0.977	0.871	1.06e-11
Mest	1.91e-07	0.631559	0.703	0.53	2.05e-05
Meg3	NA	0.614927	0.601	0.421	NA
Rps2	9.55e-25	0.607619	1	1	9.73e-22
Tpm3-rs7	5.82e-18	0.604984	0.587	0.119	2.64e-15
Eif3j1	3.32e-15	0.603631	0.752	0.376	1.35e-12
Arpc1b	1.2e-10	0.599275	0.983	0.96	2.45e-08
Pttg1	9.71e-08	0.590402	0.459	0.347	1.16e-05
Erh	5.9e-11	0.566395	0.881	0.733	1.33e-08
Tuba1a	6.79e-05	0.563235	0.947	0.916	0.00291316
Ran	0.000282125	0.557746	0.967	0.965	0.00766252
Eif5a	1.35e-06	0.556068	0.997	0.97	0.000126977
Hmgn2	2.87e-05	0.555718	0.904	0.812	0.00144363
Rbp1	7.94e-07	0.53364	0.776	0.599	8.08e-05
Stmn1	0.00131708	0.532457	0.917	0.812	0.0255513
Dlk1	0.0546142	0.530396	0.416	0.228	0.333082
Cox5b	9.2e-10	0.529336	0.983	0.901	1.5e-07
Tmsb10	1.24e-11	0.527934	0.997	1	2.96e-09
Ube2c	0.513696	0.527811	0.462	0.376	0.998358
Nme1	2.37e-05	0.522958	0.901	0.812	0.00132223
Rpl35	2.68e-23	0.509049	1	1	1.82e-20
Ptn	0.000290726	0.504772	0.884	0.797	0.00784382
Itm2a	NA	0.501069	0.426	0.292	NA
Srsf2	3.38e-06	0.498427	0.927	0.822	0.000270043
Snrpg	5.77e-09	0.495878	0.921	0.817	8.7e-07
Hspa5	9.16e-05	0.494609	0.974	0.955	0.00352048
Hsp90aa1	0.000138975	0.493311	0.974	0.946	0.00446867
Gm10076	9.78e-10	0.4908	0.881	0.738	1.53e-07
H2afz	0.0219382	0.489444	0.99	0.975	0.186201
Hmgb2	0.191545	0.486129	0.792	0.728	0.67916
Hspa8	1.97e-06	0.485213	1	0.99	0.000162038
Ube2s	0.0231089	0.485014	0.947	0.837	0.19448
Ybx1	1.99e-05	0.482852	0.993	0.975	0.001141
Srsf3	1.74e-05	0.477319	0.983	0.96	0.00101296
Phgdh	0.00451502	0.47458	0.66	0.49	0.0625653
Calm1	2.79e-05	0.471448	0.997	0.975	0.00144363
Hsp90b1	9.62e-05	0.468689	0.99	0.931	0.003564
Srsf7	3.24e-05	0.46868	0.861	0.728	0.00159793
Psma3	1.08e-07	0.468468	0.97	0.926	1.22e-05
Hnrnpa3	8.07e-06	0.466677	0.983	0.916	0.000556972
mt-Nd1	NA	0.466059	1	0.995	NA
Slc25a5	0.000748717	0.465188	0.954	0.95	0.016488
Ppp1r14b	0.0001119	0.46257	0.954	0.881	0.0038555
Fabp4	0.156118	0.461529	0.413	0.307	0.611561
Akr1b7	0.0500587	0.460094	0.581	0.545	0.316676
Atp5k	1.08e-06	0.459809	0.983	0.955	0.00010475
Cks1b	0.00924993	0.459329	0.776	0.584	0.1041
Rps21	6.06e-21	0.457812	1	1	3.52e-18
Basp1	9.04e-05	0.456738	0.947	0.881	0.00350743
Hspe1	0.000719041	0.45618	0.974	0.946	0.0160954
Calr	4.36e-05	0.45492	0.974	0.97	0.0019937
Atp5g1	8.75e-05	0.454704	0.964	0.916	0.00349381
Jpt1	0.00851099	0.454633	0.842	0.708	0.099068
Birc5	0.209972	0.453114	0.422	0.351	0.716436
AC160336.1	0.00617849	0.452741	0.736	0.574	0.0786599
Dcn	NA	0.451351	0.234	0.134	NA
Cox7c	4.39e-06	0.45133	1	0.99	0.000337134
Hnrnpa2b1	2.87e-05	0.45112	0.99	0.98	0.00144363
Hspd1	0.0151093	0.450768	0.927	0.847	0.143486
Prdx1	1.41e-05	0.450378	0.987	0.97	0.000853617
Eif5	1.14e-05	0.44902	0.904	0.767	0.000727053
Shisa3	0.000142764	0.44882	0.479	0.312	0.00450869
Pomp	6.34e-05	0.448422	0.921	0.876	0.00277828
Fdps	0.00111667	0.44695	0.564	0.317	0.0226335
Ranbp1	0.00684594	0.44636	0.858	0.782	0.0847731
Rbm3	8.66e-06	0.44563	0.977	0.955	0.000578349
Sap18	1.23e-07	0.444868	0.789	0.629	1.35e-05
Hnrnpab	0.00030233	0.442801	0.924	0.797	0.00804597
Arf5	1.59e-06	0.44085	0.983	0.965	0.000134648
Phlda1	0.0472904	0.440484	0.492	0.322	0.306298
Pebp1	1.01e-06	0.439798	0.997	0.98	0.000100826
Ppa1	6.42e-06	0.439278	0.584	0.361	0.000459154
Mdh2	3.61e-05	0.437733	0.957	0.886	0.00174873
Fkbp1a	0.000111595	0.434306	0.947	0.931	0.0038555
Selenoh	0.0130128	0.433822	0.838	0.752	0.131876
Tubb4b	0.198799	0.433026	0.835	0.663	0.693683
Snrpd3	0.000103601	0.433022	0.881	0.772	0.00376849
Ppia	2.34e-05	0.432709	1	0.995	0.00132223
Nhp2	0.000297764	0.432686	0.69	0.52	0.00798086
Vcp	7.82e-06	0.432546	0.967	0.936	0.000549383
Tubb5	0.0663363	0.4322	0.993	0.99	0.373795
Igfbp4	0.00212749	0.431932	0.809	0.639	0.0362652
Ddx39b	0.00015899	0.43117	0.944	0.851	0.00479797
Arpp19	8.2e-06	0.430291	0.891	0.817	0.000556972
Oaz1	1.42e-05	0.430091	0.997	1	0.000853617
Psmb3	4.15e-05	0.429624	0.914	0.861	0.00192029
Col3a1	0.00133793	0.428745	0.792	0.609	0.025711
Cycs	0.00336354	0.427044	0.822	0.708	0.0501944
Cox5a	0.000188288	0.426388	0.987	0.941	0.00552214
Actg1	0.00335583	0.426041	1	0.995	0.0501944
Serpinh1	0.00011349	0.425223	0.993	0.985	0.0038555
Ncl	0.00770849	0.424883	0.99	0.995	0.0918256
Map3k7cl	0.00142148	0.423975	0.465	0.297	0.0269354
Snrpf	0.000503421	0.423795	0.927	0.896	0.0119938
Rex1bd	1.53e-05	0.423279	0.884	0.767	0.000904358
Cks2	0.27057	0.422615	0.535	0.381	0.804013
Eif4a1	9.49e-05	0.422108	1	0.995	0.003564
Rpl38	3e-10	0.421954	1	1	5.56e-08
Psma7	0.000713555	0.421695	0.977	0.955	0.0160609
Nucks1	0.0418004	0.419408	0.875	0.817	0.285251
Minos1	1.08e-05	0.417078	0.931	0.866	0.000696636
Rpl27	3.26e-05	0.416817	0.954	0.931	0.00159793
Set	0.00938527	0.415372	0.98	0.931	0.105332
Dkk1	0.0672369	0.415337	0.149	0.074	0.376733
Sfpq	0.00444494	0.413885	0.937	0.847	0.0618044
Uqcrq	0.000996283	0.413833	0.931	0.881	0.0203963
Ywhae	0.000151522	0.413794	0.993	0.99	0.00464137
Romo1	2.51e-05	0.413577	0.944	0.856	0.00136178
H19	NA	0.411682	0.772	0.53	NA
Psmd6	4.1e-05	0.411137	0.884	0.787	0.00191842
Maged1	0.000140046	0.408454	0.914	0.787	0.00446867
Cdk1	0.235973	0.408359	0.538	0.386	0.751993
mt-Nd4l	0.00295664	0.408354	0.993	0.98	0.0456264
Anp32e	0.00271823	0.408249	0.759	0.639	0.0430897
Sfr1	7.81e-05	0.408198	0.95	0.876	0.00324518
Dnaja1	0.000317918	0.40819	0.997	0.965	0.00824966
Manf	0.000220332	0.407995	0.865	0.777	0.00632135
H2afx	0.344409	0.407559	0.7	0.564	0.8797
Ybx3	0.0148548	0.407261	0.785	0.723	0.142396
Dbi	0.000646059	0.406989	0.934	0.891	0.0149984
Hmgn1	0.00175912	0.406971	0.993	1	0.0315712
Sec61b	0.000122047	0.406761	0.957	0.916	0.00400998
Cfl1	0.00209205	0.405155	1	1	0.035811
Rcn3	0.000147048	0.404748	0.904	0.851	0.00459965
Eef1g	0.00019558	0.403694	0.997	0.97	0.00569138
Ssr2	0.0001404	0.403674	0.934	0.851	0.00446867
Dazap1	2.69e-05	0.402931	0.822	0.644	0.0014429
Hmgb1	0.0600555	0.402789	0.997	0.995	0.351027
Suclg1	6.68e-05	0.402713	0.878	0.767	0.00289565
Lyar	0.000724012	0.402154	0.686	0.54	0.0161182
Ndufa5	0.000148163	0.401254	0.927	0.832	0.00459965
Nudc	0.000936916	0.401215	0.927	0.817	0.0195743
Oxct1	0.00011109	0.400948	0.832	0.708	0.0038555
Cdc20	0.392291	0.40093	0.37	0.267	0.913136
Psma4	0.0004974	0.399456	0.924	0.876	0.01192
Mdk	0.00355233	0.399359	0.99	0.95	0.0521277
Srsf6	8.1e-05	0.397145	0.861	0.738	0.00333365
Maged2	0.00635478	0.396797	0.997	1	0.0798891
Hmgb3	0.00228931	0.396719	0.779	0.644	0.0383812
Cops6	0.000153484	0.395343	0.908	0.847	0.00466636
Acp1	8.89e-05	0.394772	0.782	0.653	0.00350743
Uchl1	0.000349899	0.394487	0.564	0.332	0.0089857
Psmc4	0.000107616	0.39355	0.888	0.802	0.00381242
Atp5e	0.000265976	0.39319	0.987	1	0.00727239
Col1a2	0.0035642	0.392242	0.927	0.856	0.0521277
Sec61g	0.000136181	0.392169	0.99	0.975	0.0044384
Fbl	0.00390592	0.391788	0.809	0.703	0.0556388
Atp5j2	0.000647334	0.391654	0.987	0.97	0.0149984
Lsm12	8.32e-05	0.391451	0.842	0.708	0.00336328
Atp5o.1	0.00114366	0.39128	0.974	0.96	0.022952
Cct7	0.00529792	0.39039	0.921	0.901	0.0708088
U2af1	0.00319217	0.389586	0.898	0.842	0.0481663
Ccnd1	0.111831	0.389112	0.634	0.53	0.507162
Ubl5	0.000105413	0.389006	0.921	0.772	0.00380047
Pfn1	0.00984472	0.388749	1	0.995	0.108386
Pa2g4	0.00369517	0.388576	0.815	0.708	0.0531948
Nasp	0.0127581	0.388429	0.776	0.569	0.129941
Cct5	0.00151178	0.386872	0.977	0.926	0.0281232
Anp32b	0.0530461	0.386783	0.983	0.975	0.327104
Cdk4	0.000912884	0.386773	0.95	0.871	0.0191706
Cyc1	0.000241965	0.386557	0.894	0.792	0.00684559
C1qbp	0.005571	0.386147	0.818	0.713	0.072512
Prmt1	0.0161952	0.386109	0.964	0.921	0.150982
Uqcr11	0.000819577	0.385594	0.977	0.95	0.0178554
Gadd45gip1	1.99e-06	0.385538	0.67	0.426	0.000162038
Srsf10	0.000107527	0.384809	0.828	0.673	0.00381242
Capzb	0.000262881	0.383507	0.944	0.866	0.00723633
Ndufb8	0.0022772	0.382703	0.944	0.916	0.0383812
Arhgdia	0.000737446	0.382618	0.934	0.856	0.016328
Mgp	0.0740315	0.382012	0.835	0.772	0.396329
Arf1	0.00112432	0.381267	0.983	0.946	0.0226757
Psmd1	0.000251778	0.381246	0.835	0.658	0.00706476
Taf10	0.000518348	0.381107	0.832	0.748	0.0122776
Hnrnpm	0.002543	0.380981	0.931	0.896	0.0409651
Ostc	0.000647944	0.380678	0.917	0.901	0.0149984
Dynll1	0.16529	0.380441	0.993	0.985	0.631617
Rpsa	0.00124318	0.379908	1	1	0.0245113
Hist1h2ae	0.208323	0.379534	0.403	0.277	0.712002
Ahsa1	8.34e-05	0.379162	0.782	0.545	0.00336328
Rpl37	7.66e-09	0.378416	0.997	1	1.11e-06
Rps27l	0.00204082	0.377877	0.941	0.906	0.035474
Rrbp1	0.00758517	0.377404	0.924	0.837	0.0911563
Tpm1	0.0471392	0.376992	0.977	0.965	0.305804
Ciapin1	1.38e-05	0.376787	0.647	0.431	0.000849401
Ptma	0.0324232	0.376744	1	1	0.245819
Ddx39	0.00535104	0.376711	0.611	0.446	0.0710103
Fam32a	3.98e-05	0.376324	0.785	0.525	0.0019092
Sumo2	0.0101603	0.37592	0.987	1	0.110973
Tyms	0.0820071	0.375651	0.525	0.391	0.420777
D8Ertd738e	0.000658772	0.37557	0.927	0.876	0.0151629
Fth1	0.00291661	0.374825	1	1	0.0453522
Psmb6	0.00849436	0.37462	0.974	0.955	0.099068
Aurkaip1	0.000122051	0.373841	0.848	0.693	0.00400998
Cwc15	0.00039804	0.373807	0.838	0.752	0.00994856
Marcksl1	0.00421473	0.373728	0.954	0.921	0.0594146
Ube2m	0.00254581	0.373459	0.891	0.851	0.0409651
Tmem167	0.000171405	0.373301	0.828	0.653	0.0051346
Psmc5	0.000971857	0.372628	0.904	0.787	0.0200982
Ndufs4	0.000234811	0.372592	0.861	0.733	0.00668966
Kcnq1ot1	0.042544	0.372287	0.901	0.802	0.288101
Kpna2	0.146869	0.372239	0.257	0.168	0.586039
Nedd8	0.00294577	0.372049	0.974	0.965	0.0456264
Snrpd1	0.0537398	0.370966	0.914	0.866	0.329723
Ap1s1	0.000149031	0.370932	0.805	0.609	0.00459965
Banf1	0.0289174	0.370501	0.832	0.787	0.227871
Rpl37a	6.27e-08	0.370289	1	1	8.07e-06
Uqcc2	0.00247632	0.370172	0.848	0.738	0.0403505
Pdap1	0.0325224	0.36983	0.96	0.926	0.245819
Uqcr10	0.00583355	0.369695	0.96	0.916	0.0749712
Fkbp3	0.00906501	0.369543	0.881	0.802	0.102871
Tomm7	0.00160857	0.369384	0.937	0.876	0.0297879
Ube2l3	0.000683077	0.369375	0.901	0.817	0.015564
Alyref	0.00761588	0.369112	0.759	0.634	0.0912082
Eef1d	0.00488613	0.369097	0.97	0.926	0.0663537
Mrfap1	0.00245119	0.368813	0.98	0.946	0.040105
Tmem258	0.00108708	0.368622	0.95	0.906	0.0221438
Hnrnpu	0.0238421	0.368104	0.983	0.921	0.197498
Mfge8	0.0292142	0.367771	0.983	0.955	0.229266
Chchd2	0.002663	0.367608	1	0.995	0.0425454
Lsm6	0.00554036	0.367453	0.776	0.639	0.0723443
Akr1a1	0.00317353	0.366868	0.96	0.906	0.0480631
Psmd8	0.00427576	0.365297	0.941	0.936	0.0596557
Phb	7.1e-05	0.3652	0.67	0.55	0.00301274
Gtf3c6	0.00025318	0.364393	0.657	0.5	0.00706476
Tubb2b	0.00183611	0.364222	0.37	0.198	0.0325231
Ccar1	0.0031733	0.364055	0.861	0.733	0.0480631
Cct8	0.0536469	0.363941	0.947	0.955	0.329649
Ddost	0.00255403	0.363481	0.908	0.767	0.0409651
Npm1	0.0164792	0.363344	1	1	0.153279
Cct3	0.0148096	0.363219	0.941	0.896	0.142298
Tpx2	0.374409	0.36281	0.347	0.277	0.901593
Ilf2	0.00123819	0.362623	0.812	0.693	0.0245113
Atp5b	0.0482172	0.362388	1	0.99	0.30845
Ubb	0.15344	0.362252	1	1	0.605733
Timm17a	0.000467775	0.361394	0.792	0.668	0.0114802
H2afy	0.0339536	0.361067	0.941	0.896	0.253811
Anxa6	0.00459369	0.36103	0.888	0.832	0.062801
Srrt	0.000113564	0.360822	0.703	0.51	0.0038555
Lgals1	0.124998	0.360495	0.98	0.975	0.536544
Arl3	0.000119587	0.360463	0.809	0.609	0.00399344
Rpl36	0.000219746	0.360184	1	0.995	0.00632135
Ssb	0.04131	0.359978	0.931	0.921	0.284285
Atp5a1	0.0104738	0.35966	0.993	0.99	0.113788
Ndufc1	0.00569497	0.359584	0.947	0.886	0.0734219
Grpel1	0.000360755	0.359179	0.805	0.649	0.00907233
Snrpe	0.0045792	0.359112	0.977	0.941	0.062801
Vdac3	0.00455959	0.358778	0.931	0.881	0.062756
Eif1ax	0.00496812	0.357999	0.881	0.752	0.0672429
Cenpe	0.425224	0.357947	0.38	0.272	0.941502
Psmd7	0.00915253	0.357863	0.947	0.842	0.103576
Mtch1	0.00268526	0.357362	0.937	0.851	0.0427334
Vps36	0.0056351	0.357295	0.703	0.614	0.0731127
Ndufa4	0.0227914	0.357135	0.941	0.881	0.192639
Rpl41	0.000891339	0.356962	1	1	0.0188151
Cacybp	0.00733383	0.356053	0.851	0.703	0.0886588
Gstp1	9.04e-05	0.355906	0.67	0.46	0.00350743
Mrto4	0.00218285	0.35585	0.653	0.47	0.0370538
Hdgf	0.0427758	0.355516	0.891	0.847	0.288524
Psmd12	0.00234921	0.355215	0.884	0.782	0.0388654
Mmp14	0.00365678	0.355105	0.894	0.762	0.0528287
Arf4	0.00612477	0.353876	0.96	0.896	0.0782204
Bud31	0.000355105	0.35364	0.68	0.495	0.0089857
Ppp1ca	0.0355988	0.353625	0.974	0.96	0.259909
Acin1	0.0038229	0.353604	0.881	0.748	0.0548398
Lsm4	0.0143579	0.353499	0.865	0.807	0.138941
Zmat2	0.000304143	0.353433	0.779	0.584	0.00804597
Nop58	0.0386803	0.353002	0.766	0.683	0.275015
Lmnb1	0.287284	0.352881	0.677	0.52	0.823706
Rpl11	0.000401947	0.35281	1	1	0.00998494
Phf5a	0.005319	0.352676	0.845	0.812	0.0708157
Nt5dc2	0.017174	0.352594	0.868	0.777	0.159016
Rpn2	0.00235635	0.352413	0.772	0.624	0.0388654
Mcm5	0.00870318	0.352128	0.455	0.272	0.0998796
Hint1	0.0552711	0.351874	0.987	0.985	0.334087
Fkbp4	0.0344012	0.350748	0.884	0.777	0.256217
Hnrnpf	0.0445671	0.350672	0.974	0.965	0.297163
Mrpl20	0.00539802	0.350483	0.871	0.787	0.071401
Ndn	0.00058248	0.350366	0.696	0.51	0.0137169
Pclaf	0.368139	0.350034	0.535	0.49	0.897546
Immt	0.00518874	0.349908	0.789	0.693	0.0699965
Hdac1	0.000687268	0.349867	0.799	0.619	0.015564
Magt1	0.000354574	0.349422	0.67	0.5	0.0089857
mt-Cytb	0.0921693	0.349407	1	0.995	0.45132
Dtymk	0.0152977	0.349311	0.71	0.634	0.144937
Eif1	0.30999	0.348472	1	1	0.850052
Eif3i	0.0094691	0.348307	0.921	0.906	0.105402
Dad1	0.0561554	0.348307	0.96	0.921	0.335835
Lrrc59	0.000886697	0.347464	0.617	0.406	0.0188151
Ndufab1	0.0112575	0.347019	0.95	0.851	0.118204
Bccip	0.000484676	0.346839	0.653	0.485	0.0118084
Atp5g3	0.0159278	0.346493	0.967	0.936	0.149515
Ufm1	0.00133058	0.346219	0.752	0.584	0.0256909
Snrpb	0.0202689	0.346056	0.99	0.941	0.176799
Rpl14	0.0149692	0.346042	1	1	0.142978
Rps27	0.00275568	0.345741	1	1	0.0435141
1810022K09Rik	0.00324226	0.345456	0.832	0.738	0.0487416
Ube2d3	0.0107793	0.345322	0.944	0.886	0.11567
Myl12a	0.0733238	0.34499	0.98	0.965	0.395587
Rps27a	0.00131592	0.344671	0.997	1	0.0255513
Morf4l2	0.0108753	0.344529	0.881	0.772	0.115682
Atp5f1	0.0322759	0.344492	0.987	0.975	0.245321
Calm2	0.168957	0.343963	0.987	0.99	0.636166
Bub3	0.0776243	0.343611	0.756	0.653	0.408381
Lsm2	0.0283345	0.343142	0.67	0.525	0.223711
Prpf40a	0.00359468	0.34306	0.875	0.728	0.0523027
Sssca1	0.000687659	0.342641	0.627	0.47	0.015564
Gng5	0.0451829	0.342424	0.997	0.995	0.300356
Psmb2	0.00859551	0.342348	0.894	0.812	0.0995364
Gipc1	0.00148963	0.341749	0.776	0.644	0.0278423
Pdia3	0.0019352	0.341624	0.954	0.807	0.0339828
Srm	0.0131508	0.341062	0.535	0.342	0.132287
Fabp7	0.28021	0.341028	0.119	0.05	0.820083
Mbd3	0.00689302	0.340163	0.868	0.767	0.0848403
Tubg1	0.000489843	0.340108	0.611	0.426	0.0118084
Rpl39	0.000992705	0.339716	1	1	0.0203963
Mrpl18	0.00623833	0.339279	0.851	0.658	0.0791743
Cdc42	0.0212305	0.339257	0.99	0.95	0.181708
Tceal8	0.00347759	0.339144	0.782	0.619	0.0515189
Rpl22l1	0.0734497	0.33879	0.97	0.97	0.395587
Tagln2	0.201405	0.338614	0.924	0.861	0.697133
Tcp1	0.0346192	0.338319	0.924	0.861	0.257125
Postn	0.013788	0.338283	0.35	0.228	0.136011
Sdhb	0.0098702	0.338086	0.871	0.797	0.108386
Serbp1	0.218565	0.338002	0.993	0.99	0.727479
Ccnb1	0.866652	0.337605	0.353	0.238	0.999628
Kdelr2	0.000802136	0.337514	0.749	0.55	0.0175694
Thoc7	0.0103745	0.337412	0.894	0.767	0.11301
Rcn2	0.000424405	0.337075	0.756	0.594	0.0104789
Rpl19	0.00979328	0.336789	0.997	1	0.108386
Rps5	0.00946211	0.336295	1	1	0.105402
Nono	0.0229169	0.336226	0.937	0.896	0.193299
Rpl10a	0.00845598	0.335807	1	1	0.0989932
Gtf2h5	0.0111042	0.335791	0.894	0.797	0.117198
Cdv3	0.0214202	0.335507	0.848	0.757	0.182565
Anxa2	0.361697	0.335222	0.977	0.97	0.890903
Fn1	0.0440897	0.335045	0.871	0.698	0.294462
Cox20	0.00287153	0.334935	0.795	0.644	0.0448222
Rpl36a	0.0433337	0.334803	0.993	1	0.291323
Ppid	0.0105937	0.334737	0.752	0.594	0.114386
2022-09-11	0.0606531	0.334537	0.927	0.871	0.35326
Ube2i	0.0388031	0.333667	0.937	0.916	0.275407
Ywhah	0.0483296	0.333471	0.901	0.812	0.308612
Zfp771	0.00124542	0.333293	0.723	0.569	0.0245113
Gpx1	0.0398154	0.333213	0.875	0.837	0.279669
Cox7a2	0.0539011	0.332954	0.967	0.941	0.330215
Rps29	0.00354655	0.332722	1	1	0.0521277
Rhoa	0.0416882	0.332548	0.987	0.95	0.284963
Mrpl51	0.0114983	0.332388	0.825	0.673	0.120113
Ccdc124	0.00278361	0.332134	0.785	0.708	0.0437854
Uqcrc1	0.017099	0.331991	0.878	0.802	0.158682
2410004B18Rik	7.34e-05	0.33197	0.505	0.252	0.00308195
Plvap	0.0133273	0.3308	0.36	0.193	0.133404
Cdkn1c	0.612956	0.330121	0.987	0.955	0.999628
Trir	0.0364287	0.329753	0.934	0.866	0.263785
Sf3b6	0.00654137	0.329671	0.838	0.752	0.081497
Plk1	0.310166	0.328892	0.277	0.178	0.850052
Phb2	0.0458921	0.32885	0.921	0.876	0.302043
Fabp5	0.538816	0.328782	0.802	0.782	0.999628
Ramp2	0.00455779	0.328762	0.498	0.317	0.062756
Bcl7c	0.00542955	0.328733	0.835	0.663	0.0715857
Nap1l1	0.157062	0.328612	0.947	0.936	0.614668
Zfp706	0.00986722	0.328189	0.812	0.683	0.108386
Mcam	0.0115883	0.327832	0.733	0.619	0.120744
Eprs	0.0292633	0.327634	0.795	0.693	0.229266
Denr	0.00548947	0.327629	0.855	0.713	0.0719103
Crip2	0.252313	0.327422	0.96	0.866	0.776376
Bag1	0.0125593	0.327284	0.888	0.847	0.128237
Ddx5	0.0523627	0.327096	0.997	1	0.325887
Rpl4	0.0530965	0.327023	1	0.995	0.327104
Psma2	0.0371201	0.326949	0.937	0.876	0.267659
Ndufc2	0.0458161	0.326926	0.944	0.901	0.30203
Cenpw	0.0415234	0.326656	0.531	0.396	0.284476
Eif2s1	0.0111968	0.326642	0.802	0.634	0.117871
Psmb5	0.0412772	0.326286	0.964	0.946	0.284285
Ndufa2	0.0549977	0.326075	0.983	0.95	0.333921
Fkbp8	0.0053011	0.325855	0.878	0.787	0.0708088
Smc1a	0.0903734	0.325821	0.875	0.807	0.44574
Eif2s2	0.136671	0.325524	0.983	0.98	0.568162
Actr3	0.0223733	0.325474	0.917	0.842	0.189499
1810058I24Rik	0.0462075	0.325474	0.927	0.851	0.302519
Rpl8	0.0522041	0.325305	1	1	0.325887
Psmb4	0.0364534	0.325014	0.944	0.926	0.263785
Top1	0.111547	0.324778	0.987	0.955	0.507162
Eno1	0.259752	0.324419	0.937	0.95	0.78824
Psmc2	0.0155874	0.323897	0.868	0.787	0.147053
Txnl1	0.0633671	0.323751	0.894	0.866	0.363001
Arpc2	0.34826	0.323539	0.983	0.97	0.881248
Dek	0.274556	0.323469	0.878	0.797	0.8118
Sf3b5	0.0146908	0.322425	0.878	0.728	0.14149
Rps11	0.0711454	0.322351	1	1	0.391155
Rpl7a	0.0560118	0.322166	1	1	0.335577
Dctpp1	0.0911585	0.321441	0.578	0.48	0.449004
Prdx2	0.059079	0.321413	0.997	0.985	0.346813
Sox4	0.0881686	0.321109	0.974	0.941	0.439118
Cald1	0.0833676	0.321105	1	1	0.425081
Pin1	0.00637096	0.320949	0.818	0.653	0.0798891
Zcchc17	0.00130993	0.320908	0.68	0.51	0.0255513
Swi5	0.0650174	0.320743	0.954	0.936	0.368402
Hnrnph1	0.0108202	0.320532	0.891	0.762	0.11567
Map2k2	0.019238	0.320362	0.884	0.827	0.1715
Elob	0.249642	0.320347	0.99	0.995	0.774005
Metap2	0.0452469	0.319978	0.957	0.876	0.300356
Gpx4	0.14562	0.31993	0.983	0.975	0.584488
Eif4a3	0.0206034	0.31977	0.828	0.718	0.177835
Rbm28	0.002486	0.3196	0.677	0.51	0.0403505
Trim28	0.0108458	0.319313	0.828	0.718	0.11567
Csnk2b	0.017878	0.319044	0.875	0.772	0.163674
Cox6c	0.149218	0.319023	0.997	0.985	0.593087
Txn1	0.366507	0.31869	0.987	0.965	0.895814
Akr1b3	0.00179327	0.318627	0.647	0.446	0.0319029
Mcrip1	0.0136145	0.318346	0.878	0.792	0.134625
Mcm7	0.0566065	0.318319	0.607	0.441	0.33765
Nde1	0.013409	0.318256	0.465	0.307	0.133566
Rnf7	0.0139269	0.318193	0.894	0.792	0.136719
G3bp2	0.00678159	0.318131	0.822	0.698	0.0842323
Glrx5	0.0156655	0.317752	0.779	0.678	0.147393
Emcn	0.0462128	0.317714	0.713	0.629	0.302519
Impdh2	0.0588828	0.317676	0.828	0.762	0.34616
Calm3	0.063031	0.317571	0.947	0.886	0.362037
mt-Nd4	NA	0.31736	1	0.995	NA
Bex3	0.101694	0.31701	0.964	0.941	0.481226
Cox7b	0.0984429	0.316885	0.957	0.926	0.474062
Il11ra1	0.000959589	0.316848	0.601	0.386	0.0199457
Ppib	0.10179	0.316738	1	0.98	0.481226
Eln	NA	0.316721	0.198	0.153	NA
Atp5h	0.0929504	0.316415	0.997	0.985	0.454053
Polr2j	0.00637308	0.316314	0.855	0.733	0.0798891
Tead2	0.00763426	0.31588	0.865	0.673	0.0912082
Hist1h1b	0.573811	0.315656	0.38	0.302	0.999628
Rab2a	0.0392367	0.315605	0.927	0.842	0.277518
Pbx1	0.20475	0.315548	0.861	0.777	0.705621
Anxa5	0.242374	0.314739	0.97	0.946	0.762637
Kpnb1	0.00830843	0.314565	0.63	0.475	0.0975462
Sumo1	0.0476244	0.314472	0.921	0.881	0.306868
Rpl3	0.088319	0.314367	1	1	0.43933
Copb2	0.00710176	0.314153	0.825	0.609	0.0868846
Chd4	0.0638407	0.314127	0.947	0.861	0.363037
Sparc	0.378958	0.314024	0.997	0.995	0.904009
Ift20	0.0108111	0.31394	0.881	0.752	0.11567
Gemin7	0.00779719	0.313894	0.792	0.644	0.0926115
Tmed9	0.0496734	0.313872	0.96	0.856	0.314727
Atp5g2	0.229874	0.313476	0.99	0.99	0.744699
Ppic	0.072076	0.313475	0.947	0.871	0.393089
Rwdd1	0.0273879	0.313366	0.891	0.782	0.220075
Rbm25	0.132275	0.313338	0.947	0.896	0.556127
Cox6b1	0.1383	0.313295	0.98	0.97	0.569528
Snx6	0.0140389	0.313233	0.818	0.748	0.137004
Eif4g2	0.248512	0.312929	0.99	0.96	0.771087
Tpr	0.188476	0.312867	0.95	0.926	0.674146
Lima1	0.021416	0.31178	0.776	0.629	0.182565
Nudcd2	0.0122019	0.311664	0.663	0.54	0.12585
Taldo1	0.0277337	0.311213	0.898	0.743	0.221543
Crip1	0.0943729	0.311201	0.914	0.851	0.459385
Rnf187	0.0194039	0.310735	0.838	0.787	0.172226
Kif23	0.295002	0.310636	0.281	0.198	0.831064
Mrpl11	0.00208265	0.310274	0.677	0.55	0.0358006
Hnrnpk	0.339638	0.310215	0.997	0.995	0.876306
Ndufb9	0.120143	0.310155	0.99	0.965	0.525248
Cenpa	0.929563	0.310102	0.637	0.584	0.999628
Psmd2	0.0355345	0.310074	0.855	0.748	0.259906
Rps23	0.230137	0.309913	0.997	1	0.744699
Bzw1	0.111243	0.309726	0.914	0.866	0.506373
Psma6	0.0619046	0.309156	0.888	0.832	0.35773
Rps3	0.3027	0.309142	1	1	0.840053
Snrnp70	0.108791	0.309111	0.954	0.906	0.499114
Carmn	0.00631696	0.309086	0.713	0.579	0.0798891
Glrx3	0.114926	0.308946	0.924	0.871	0.513657
Slc25a4	0.329398	0.308815	1	0.99	0.865227
Rtraf	0.0838779	0.308639	0.97	0.936	0.426615
Coq7	0.00860011	0.308555	0.683	0.51	0.0995364
Tipin	0.0638611	0.308453	0.554	0.416	0.363037
Strap	0.0180685	0.308424	0.785	0.683	0.16431
Col1a1	0.160815	0.308342	0.644	0.485	0.62337
Ssrp1	0.159444	0.308332	0.818	0.708	0.619152
Ppp2ca	0.0776866	0.308327	0.944	0.886	0.408381
Psmb1	0.141492	0.308284	0.983	0.96	0.576797
Tma7	0.0995903	0.308226	0.98	0.931	0.477331
Tmem126a	0.00297724	0.307943	0.64	0.455	0.0457709
Mrpl52	0.236636	0.307906	0.934	0.916	0.751993
Naa15	0.00303596	0.307858	0.693	0.5	0.0464981
Tomm20	0.17936	0.307703	0.964	0.926	0.655937
Ftl1	0.571239	0.307665	1	1	0.999628
Pdcd5	0.0553912	0.307387	0.983	0.941	0.334201
Rfc4	0.0116641	0.307373	0.545	0.361	0.121223
Ptms	0.408545	0.307194	0.997	1	0.929985
Mrps15	0.00544849	0.307006	0.729	0.554	0.0716036
Ssr4	0.0549936	0.306537	0.917	0.797	0.333921
Rps3a1	0.297807	0.306424	0.997	1	0.835006
G3bp1	0.133023	0.306128	0.884	0.762	0.558696
Atp5c1	0.18203	0.306042	0.997	0.975	0.660365
Rbbp7	0.0770852	0.305977	0.901	0.802	0.406268
Abcf2	0.000891206	0.30597	0.564	0.312	0.0188151
Stip1	0.0300498	0.305906	0.693	0.574	0.233186
Mdh1	0.0750285	0.305654	0.921	0.886	0.398522
Krtcap2	0.0761996	0.305479	0.914	0.812	0.403165
Ndufa12	0.0954801	0.305307	0.868	0.802	0.461431
Cct2	0.16414	0.305066	0.947	0.926	0.630854
Magoh	0.0150239	0.305021	0.779	0.658	0.143008
Rhoc	0.190047	0.304753	0.904	0.871	0.676795
Atp5j	0.293723	0.304473	0.993	0.99	0.830416
Rps17	0.444704	0.304241	0.997	1	0.959092
Hsp90ab1	0.710082	0.303866	1	1	0.999628
Mrps12	0.00170034	0.303729	0.663	0.465	0.0310777
Gspt1	0.0574545	0.303443	0.845	0.698	0.339232
Rab14	0.0891648	0.303401	0.931	0.916	0.442997
Mrpl13	0.0109565	0.303325	0.776	0.644	0.115939
Nsmce2	0.00283341	0.303318	0.647	0.47	0.0443973
Ptov1	0.173829	0.302882	0.967	0.955	0.646149
Tubb2a	0.00827232	0.302821	0.439	0.257	0.097403
Scd2	0.00825151	0.302679	0.693	0.5	0.097403
Mcm3	0.0732088	0.302638	0.429	0.307	0.395587
Mrpl57	0.0193327	0.30256	0.749	0.599	0.171968
Phf20l1	0.108756	0.302497	0.766	0.634	0.499114
Ren1	NA	0.302455	0.29	0.228	NA
Rnaseh2c	0.21905	0.302163	0.776	0.733	0.727798
Serp1	0.00233486	0.302154	0.64	0.48	0.0388254
Eny2	0.100687	0.302126	0.868	0.817	0.480809
Rps9	0.361632	0.302051	1	1	0.890903
Usmg5	0.135533	0.302022	0.894	0.856	0.565362
Cdca8	0.868604	0.301603	0.429	0.342	0.999628
Ywhaq	0.22178	0.301429	0.977	0.97	0.732906
Btf3	0.389062	0.301397	0.99	1	0.910728
Rdx	0.133411	0.301296	0.937	0.886	0.55975
Rpl36al	0.0569254	0.300902	0.766	0.738	0.33856
Actb	0.700989	0.300897	1	1	0.999628
Prdx6	0.101939	0.30084	0.805	0.703	0.481226
Dut	0.205613	0.300823	0.627	0.515	0.706295
Top2a	0.842366	0.30082	0.436	0.332	0.999628
Nop10	0.0294938	0.30073	0.785	0.594	0.230629
Pnn	0.0994803	0.300665	0.911	0.847	0.477331
Eef1a1	0.539652	0.300241	1	1	0.999628
Ndufa11	0.0725203	0.300226	0.931	0.851	0.394669
Nr2f1	0.359814	0.299699	0.772	0.708	0.890525
Cebpz	0.00231513	0.299623	0.644	0.421	0.0386551
Smc3	0.123613	0.299569	0.851	0.812	0.534478
Bclaf1	0.0420242	0.29956	0.845	0.678	0.286299
Atp5l	0.24637	0.299479	0.977	0.975	0.768484
Selenof	0.207846	0.299286	0.98	0.936	0.711566
Rcn1	0.0482284	0.299148	0.901	0.812	0.30845
Ndufb5	0.137787	0.298969	0.967	0.911	0.569528
Eloc	0.0318212	0.298532	0.842	0.693	0.243684
P3h3	0.00883663	0.298519	0.766	0.579	0.101125
Dhx15	0.031106	0.298069	0.729	0.579	0.239105
Sar1a	0.00888821	0.298045	0.716	0.584	0.10143
Srsf11	0.202724	0.297925	0.941	0.871	0.7011
Hras	0.0380255	0.297918	0.802	0.738	0.27322
Gnl3	0.0238488	0.297809	0.584	0.446	0.197498
Sms	0.0350536	0.297789	0.686	0.52	0.258499
Emg1	0.0665251	0.29749	0.842	0.748	0.374342
Pcbp4	0.00307132	0.297131	0.584	0.401	0.0468636
Snrpa1	0.0730967	0.296967	0.779	0.678	0.395587
Tuba1b	0.671653	0.296858	0.901	0.832	0.999628
Ywhab	0.371041	0.296416	0.937	0.926	0.900145
Bola2	0.0319259	0.296359	0.759	0.589	0.244026
Gm8186	0.00145906	0.296295	0.545	0.327	0.0275195
Slc9a3r2	0.0187395	0.296121	0.587	0.52	0.168904
Pkdcc	0.221815	0.29608	0.624	0.515	0.732906
Rps7	0.643836	0.295969	1	1	0.999628
S100a10	0.115365	0.295859	0.756	0.599	0.513657
Arpc1a	0.0401005	0.295657	0.878	0.822	0.279742
Mrps33	0.0385568	0.295272	0.822	0.743	0.274616
Morf4l1	0.625104	0.295269	0.987	0.98	0.999628
Ddx18	0.0209442	0.295248	0.67	0.495	0.180382
Acadl	0.0525417	0.295213	0.736	0.589	0.326303
Snrpd2	0.378579	0.295193	0.964	0.941	0.904009
Tagln	0.361557	0.295069	0.403	0.347	0.890903
Rplp2	0.607667	0.294938	1	1	0.999628
Col4a1	0.073913	0.294651	0.997	1	0.396329
Pdgfra	0.156086	0.294222	0.525	0.391	0.611561
Supt16	0.0456826	0.294155	0.825	0.644	0.301804
Psip1	0.167066	0.294072	0.861	0.723	0.634231
Hmgcs1	0.0239206	0.29367	0.525	0.376	0.197673
Cnbp	0.491089	0.29364	0.95	0.896	0.986536
Mat2a	0.0807139	0.29338	0.805	0.668	0.415188
Rnh1	0.0149856	0.293374	0.812	0.614	0.142978
Cdc123	0.00387008	0.293364	0.634	0.46	0.0553217
Tm2d2	0.00687658	0.292973	0.723	0.545	0.0848403
Exosc8	0.0502541	0.292682	0.578	0.406	0.317419
Mrpl54	0.0405814	0.292601	0.822	0.718	0.281373
Atp2b1	0.341849	0.292533	0.891	0.772	0.877861
Sem1	0.375087	0.292505	0.974	0.955	0.901593
Cnn2	0.374681	0.29233	0.921	0.871	0.901593
Aco2	0.0232001	0.292039	0.759	0.609	0.19448
Tbcb	0.0570107	0.291833	0.908	0.812	0.338574
Ndufb11	0.177203	0.291739	0.964	0.921	0.652146
Rpl7	0.793325	0.29165	1	1	0.999628
Slirp	0.00894405	0.291472	0.743	0.574	0.101782
Mrpl55	0.0013855	0.291434	0.492	0.257	0.0263763
Mrpl12	0.114563	0.291228	0.795	0.718	0.513657
Pgf	0.0130899	0.291101	0.396	0.218	0.132287
Carnmt1	0.00569118	0.29061	0.63	0.411	0.0734219
Rps26	0.489431	0.29043	0.997	0.995	0.986068
Rpl6	0.84092	0.290306	1	1	0.999628
Psma1	0.0903136	0.290287	0.835	0.797	0.44574
Tra2b	0.280406	0.290273	0.927	0.827	0.820083
Dpm3	0.0784543	0.290204	0.875	0.752	0.409969
Eif3c	0.320608	0.290151	0.941	0.881	0.854815
Med28	0.0138674	0.290095	0.756	0.574	0.136463
Rps13	0.9382	0.289918	1	1	0.999628
Ezh2	0.116615	0.289877	0.611	0.505	0.514725
Gnb1	0.219781	0.289752	0.894	0.861	0.727959
Cct4	0.21848	0.289738	0.977	0.901	0.727479
Rpl18	0.995661	0.28966	1	1	0.999628
Arl1	0.0804373	0.289447	0.855	0.767	0.415188
Anapc5	0.163423	0.289059	0.901	0.802	0.629285
Ppp1r11	0.026861	0.288826	0.772	0.629	0.217126
Echs1	0.0267298	0.288803	0.812	0.668	0.216927
Tbrg1	0.0383721	0.288776	0.812	0.663	0.274616
Psmc1	0.0464024	0.288754	0.743	0.649	0.302954
Elavl1	0.0512034	0.288745	0.769	0.649	0.322415
Rpl30	0.995136	0.288732	1	1	0.999628
Tomm40	0.0943802	0.288728	0.733	0.649	0.459385
Arpc5l	0.0559339	0.288692	0.785	0.713	0.335577
Canx	0.0912556	0.288611	0.818	0.713	0.449004
Ndufb4	0.105152	0.288487	0.878	0.802	0.491272
Timm13	0.236103	0.288322	0.898	0.871	0.751993
Lgi1	0.03492	0.287682	0.446	0.312	0.258499
Psmd13	0.0674125	0.287682	0.838	0.743	0.376733
Sugt1	0.0880284	0.287682	0.871	0.767	0.439118
Sec11a	0.0638281	0.286718	0.842	0.767	0.363037
Eif5b	0.258612	0.286537	0.937	0.901	0.78824
Rpl31	0.775168	0.28629	0.99	0.99	0.999628
Pcolce	0.0125232	0.286138	0.545	0.361	0.128189
Prpf31	0.00522573	0.286109	0.574	0.356	0.0702628
Eif3l	0.0782873	0.285895	0.871	0.772	0.409969
Rpl12	0.896542	0.285849	1	0.995	0.999628
Gna11	0.0797214	0.28579	0.858	0.757	0.413739
Mtdh	0.261212	0.285724	0.917	0.861	0.790036
Cox8a	0.892983	0.285717	0.997	0.99	0.999628
Idh2	0.353494	0.285704	0.98	0.965	0.883788
Matr3	0.0545283	0.2857	0.832	0.738	0.333082
Ccnd2	0.236887	0.285599	0.914	0.861	0.752204
Siva1	0.263578	0.285461	0.828	0.733	0.795419
Snrnp40	0.0352668	0.285198	0.67	0.49	0.258773
Dph3	0.0175479	0.285179	0.743	0.569	0.161742
Ndufb7	0.134238	0.285005	0.924	0.881	0.56206
Eif4h	0.164453	0.284972	0.927	0.881	0.630866
2810004N23Rik	0.0140324	0.284829	0.614	0.45	0.137004
Eif1a	0.010025	0.284665	0.591	0.356	0.10979
Ndufa1	0.0326959	0.284641	0.868	0.708	0.246673
Slbp	0.0730793	0.284635	0.706	0.545	0.395587
Ndufs7	0.189122	0.284586	0.871	0.837	0.675269
Fstl1	0.0493709	0.284542	0.921	0.817	0.313472
Ppih	0.00603239	0.284441	0.531	0.342	0.0772828
Lsm5	0.0623165	0.284343	0.677	0.569	0.359091
Txndc9	0.0304665	0.284313	0.779	0.673	0.235176
Gps1	0.0350884	0.284298	0.772	0.629	0.258499
Rpl13	0.714698	0.284273	0.997	1	0.999628
Zfp91	0.113492	0.284161	0.828	0.708	0.511466
Puf60	0.0683479	0.284019	0.851	0.728	0.380916
Acbd6	0.0142441	0.283788	0.69	0.55	0.138167
Tomm5	0.0855737	0.283633	0.776	0.728	0.431765
Ola1	0.0177072	0.283631	0.644	0.495	0.162832
Txn2	0.121441	0.28355	0.736	0.649	0.528159
Odc1	0.0342012	0.283472	0.574	0.391	0.255194
Khdrbs1	0.114498	0.28345	0.838	0.762	0.513657
Eif3h	0.375285	0.283407	0.97	0.975	0.901593
Mlf2	0.20507	0.283293	0.911	0.812	0.705621
Psmc6	0.177598	0.283201	0.898	0.812	0.653009
Dda1	0.00706382	0.283194	0.614	0.475	0.0866807
Fus	0.26416	0.283105	0.974	0.95	0.795997
Smn1	0.00413152	0.282878	0.564	0.371	0.0584438
Impa1	0.00339869	0.282863	0.597	0.406	0.0505338
Hnrnpd	0.655122	0.282632	0.917	0.906	0.999628
Cnih1	0.00968609	0.282172	0.677	0.485	0.107523
AU019823	0.00228187	0.281874	0.459	0.248	0.0383812
Larp7	0.0523711	0.281838	0.696	0.599	0.325887
1110004F10Rik	0.311091	0.281719	0.941	0.861	0.850052
Pabpc1	0.638571	0.281686	0.983	0.936	0.999628
Eif3a	0.347789	0.281537	0.97	0.861	0.881248
Clns1a	0.0199131	0.281365	0.703	0.54	0.175218
Brix1	0.0183227	0.281011	0.65	0.515	0.166251
Sae1	0.183179	0.280762	0.772	0.723	0.662913
Cbx1	0.258112	0.280754	0.924	0.871	0.787742
Prrc2c	0.374935	0.280696	0.921	0.822	0.901593
Cdk9	0.00725407	0.280554	0.657	0.505	0.0882181
Rpl9	0.599089	0.280384	1	1	0.999628
Cdc37	0.372092	0.280352	0.967	0.921	0.90018
Ndufb6	0.129307	0.280103	0.838	0.787	0.547761
Slc25a3	0.932387	0.279974	0.993	0.98	0.999628
Ccdc88a	0.212738	0.279945	0.776	0.718	0.720247
Rps4x	0.540676	0.279862	1	1	0.999628
Vdac1	0.284456	0.279839	0.921	0.901	0.82054
Nudt5	0.0315038	0.27965	0.627	0.51	0.241707
Cisd2	0.0203098	0.279607	0.667	0.515	0.176799
Luc7l3	0.301817	0.279598	0.865	0.782	0.838627
Cdc26	0.033516	0.27949	0.752	0.629	0.251463
Klhl23	0.0715792	0.279452	0.637	0.475	0.392015
Igf2r	0.0203943	0.279219	0.587	0.48	0.177157
Atxn7l3b	0.426084	0.27891	0.97	0.941	0.942353
Spc25	0.424589	0.278891	0.383	0.322	0.941228
Rps12	0.564172	0.27857	1	1	0.999628
Prrx1	0.338595	0.278508	0.129	0.04	0.876306
Ddx1	0.128206	0.278427	0.848	0.738	0.545208
Taf1d	0.153421	0.278397	0.825	0.718	0.605733
Dkc1	0.0396059	0.278178	0.574	0.401	0.278678
Selenow	0.810695	0.278052	0.993	0.99	0.999628
Tril	0.130995	0.277765	0.779	0.629	0.553029
Auts2	0.0275106	0.277682	0.7	0.53	0.220193
Cnn3	0.299282	0.277523	0.908	0.861	0.835691
Ndc80	0.234588	0.27739	0.3	0.193	0.751902
Fam92a	0.0434695	0.277355	0.759	0.629	0.291754
Acat1	0.105306	0.277231	0.795	0.738	0.491428
Timm8a1	0.0235749	0.277211	0.525	0.371	0.196747
Coa3	0.104128	0.277063	0.891	0.738	0.488443
Usp14	0.0274648	0.277012	0.769	0.579	0.220193
Trip13	0.0630329	0.276509	0.356	0.218	0.362037
Akt1	0.101646	0.276488	0.851	0.718	0.481226
Wdr83os	0.06101	0.276301	0.802	0.673	0.354067
Psmd3	0.045341	0.276253	0.733	0.649	0.300356
Aldh1a2	0.0606976	0.276253	0.449	0.282	0.35326
U2af2	0.0370242	0.276195	0.637	0.48	0.26744
Esd	0.269099	0.276184	0.927	0.901	0.801389
Polr2e	0.0806659	0.276182	0.785	0.693	0.415188
Srp9	0.376227	0.276106	0.934	0.911	0.901997
Eef1b2	0.9144	0.275884	0.997	1	0.999628
Rexo2	0.0782971	0.275627	0.719	0.609	0.409969
Thoc2	0.0476798	0.275574	0.782	0.604	0.306868
P4hb	0.0552075	0.275549	0.825	0.673	0.334087
Mrpl41	0.0186434	0.275512	0.67	0.52	0.168411
Polr2c	0.0902314	0.275435	0.848	0.733	0.44574
Tceal9	0.415795	0.275307	0.974	0.936	0.935285
Lsm7	0.0299107	0.27529	0.716	0.559	0.232614
Aurka	0.332171	0.275193	0.264	0.153	0.870268
Smarcb1	0.0703342	0.275182	0.799	0.653	0.388795
H2afv	0.923742	0.275136	0.97	0.965	0.999628
Sub1	0.944499	0.275111	0.997	0.98	0.999628
Dpy30	0.0531524	0.275074	0.719	0.629	0.327104
Fkbp2	0.0953452	0.274899	0.703	0.535	0.461326
Hmbs	0.00642672	0.274653	0.571	0.366	0.0803142
Cdca3	0.415943	0.274476	0.35	0.252	0.935285
Ddah2	0.733288	0.274319	0.937	0.95	0.999628
Mafb	0.0172944	0.274259	0.422	0.272	0.159767
Itga9	0.0469355	0.274259	0.62	0.505	0.304969
Ankrd11	0.279394	0.274041	0.957	0.881	0.819964
Rps28	0.500246	0.273637	0.997	1	0.993341
Ccdc85b	0.00728553	0.27343	0.614	0.421	0.088337
Calu	0.0740321	0.273204	0.809	0.683	0.396329
H1fx	0.678638	0.273083	0.888	0.832	0.999628
Oat	0.121526	0.272867	0.776	0.624	0.528159
Sumo3	0.0767705	0.272749	0.812	0.718	0.405133
Ccna2	0.708059	0.272627	0.383	0.257	0.999628
Tsen34	0.176319	0.272466	0.878	0.782	0.650548
Ube3a	0.104274	0.272321	0.838	0.762	0.488443
Smc2	0.762265	0.271912	0.584	0.421	0.999628
Heyl	0.0657243	0.271901	0.703	0.594	0.371374
Limd2	0.104771	0.27184	0.802	0.713	0.490056
Rpl34	0.30198	0.271792	1	1	0.838627
Psmb7	0.0804016	0.271714	0.825	0.693	0.415188
Sltm	0.262698	0.271714	0.815	0.678	0.79394
Ilk	0.38824	0.271671	0.924	0.812	0.910728
Rfc2	0.0351688	0.271553	0.614	0.416	0.258624
Tsfm	0.00423167	0.27148	0.528	0.292	0.0594476
Hdlbp	0.101267	0.271303	0.825	0.718	0.481226
Sec13	0.0292333	0.271257	0.68	0.54	0.229266
Ccnb2	0.98232	0.271137	0.413	0.386	0.999628
Tex261	0.0119861	0.271028	0.597	0.45	0.123938
Cenpf	0.513626	0.270756	0.399	0.287	0.998358
Tmed1	0.0140775	0.270614	0.607	0.431	0.137004
Smc6	0.173096	0.270479	0.782	0.644	0.645808
Pfdn4	0.0186197	0.270341	0.607	0.475	0.168411
Phc2	0.0279926	0.27029	0.66	0.55	0.222479
Ptbp1	0.0676359	0.270176	0.746	0.649	0.377464
Apoe	0.0202737	0.270168	0.419	0.277	0.176799
Baz1b	0.0727939	0.270003	0.706	0.535	0.395416
Gtf3a	0.0195359	0.269877	0.574	0.436	0.172645
Tcf3	0.0255322	0.269861	0.64	0.52	0.208872
Pcbp2	0.342467	0.269783	0.931	0.911	0.878597
Rps10	0.164865	0.269617	1	1	0.631617
Incenp	0.505984	0.269613	0.347	0.272	0.996292
1110008F13Rik	0.147922	0.269595	0.809	0.748	0.589662
Txndc5	0.0515594	0.26957	0.683	0.53	0.323656
Park7	0.34364	0.269537	0.95	0.891	0.878838
Rps25	0.664998	0.269355	0.993	1	0.999628
Psmc3	0.389865	0.26926	0.917	0.876	0.910728
Smarce1	0.230355	0.269141	0.894	0.792	0.744813
Zeb2	0.615858	0.269129	0.937	0.911	0.999628
Tgfbi	0.111078	0.26894	0.498	0.376	0.506187
Ier3ip1	0.0503766	0.268679	0.776	0.644	0.3177
Rpl15	0.0813957	0.268667	1	1	0.418167
Stub1	0.288156	0.268593	0.898	0.802	0.823706
Rps8	0.0877658	0.268537	1	1	0.439118
Scand1	0.353819	0.268409	0.941	0.906	0.883788
Hnrnpdl	0.376741	0.268389	0.898	0.827	0.902317
Eif4g1	0.0549385	0.268358	0.713	0.579	0.333921
Wsb2	0.0295878	0.268318	0.63	0.5	0.230921
Fip1l1	0.11011	0.268308	0.706	0.634	0.5029
Cenpm	0.167715	0.268264	0.393	0.257	0.635011
Hnrnpa1	0.900295	0.268216	0.993	0.98	0.999628
Evl	0.0177461	0.268101	0.653	0.441	0.162832
Itga6	0.284268	0.267958	0.495	0.416	0.82054
Fscn1	0.0140905	0.267879	0.508	0.347	0.137004
Pcbp1	0.572044	0.267809	0.967	0.926	0.999628
Spcs1	0.228927	0.267128	0.894	0.802	0.743738
Prdx4	0.434035	0.266983	0.904	0.802	0.951006
Bcas2	0.143896	0.266946	0.835	0.752	0.580964
Dnajc7	0.113804	0.26692	0.845	0.703	0.512306
Naca	0.403671	0.2669	1	1	0.926125
Ckap4	0.112039	0.266699	0.855	0.777	0.507162
Prelid1	0.550087	0.266653	0.931	0.886	0.999628
Rpl10	0.70218	0.266424	1	1	0.999628
Ndufa13	0.498986	0.266311	0.99	0.955	0.993341
Ubtf	0.125007	0.266297	0.749	0.639	0.536544
Slc39a7	0.0106131	0.266282	0.578	0.391	0.114386
Rpl27a	0.139222	0.266009	1	1	0.571765
Aebp1	0.0267941	0.265703	0.469	0.332	0.217016
Ncbp2	0.038516	0.265703	0.7	0.535	0.274616
Mrpl15	0.0688797	0.265652	0.719	0.599	0.383355
Uba2	0.585183	0.265648	0.845	0.772	0.999628
Ndufs2	0.600029	0.265528	0.954	0.936	0.999628
Uqcrb	0.6997	0.265412	0.96	0.955	0.999628
Rbm8a	0.468967	0.26529	0.868	0.817	0.976276
Srp19	0.131425	0.265231	0.809	0.752	0.553127
Cox4i1	0.679995	0.264661	0.997	1	0.999628
Rap2a	0.565723	0.264425	0.713	0.599	0.999628
Rpl23a	0.372523	0.264319	1	1	0.900688
Rtf1	0.200954	0.264284	0.908	0.812	0.697133
Tmem14c	0.116422	0.264224	0.795	0.653	0.514464
Snu13	0.343252	0.263828	0.875	0.748	0.878805
Sf3b1	0.837977	0.263687	0.964	0.965	0.999628
Eid1	0.385597	0.263687	0.927	0.866	0.910001
Ruvbl1	0.167019	0.263681	0.746	0.653	0.634231
Raly	0.4882	0.263614	0.927	0.916	0.985105
Eif4e2	0.171705	0.263585	0.825	0.733	0.64354
Mrpl30	0.139527	0.263176	0.861	0.782	0.57184
Cxcl12	0.0216586	0.263076	0.363	0.233	0.184211
2022-09-07	0.885757	0.262935	0.997	1	0.999628
Aimp1	0.374764	0.262859	0.891	0.837	0.901593
Armcx2	0.0245702	0.262514	0.62	0.475	0.20222
Arl6ip1	0.284591	0.262489	0.703	0.624	0.82054
Itpa	0.0131463	0.262284	0.614	0.376	0.132287
Itga1	0.346804	0.262211	0.875	0.757	0.880299
Nfu1	0.0211442	0.261904	0.62	0.5	0.18135
Ndufa10	0.258764	0.261901	0.878	0.812	0.78824
Sgta	0.0556646	0.261739	0.752	0.614	0.334974
Cited2	0.982785	0.261668	0.871	0.896	0.999628
Anapc11	0.1619	0.261602	0.769	0.653	0.625999
Ebna1bp2	0.103684	0.261583	0.67	0.545	0.487208
Ik	0.054552	0.261545	0.719	0.599	0.333082
Stag1	0.0376254	0.261528	0.677	0.51	0.270823
Chtf8	0.0109223	0.261108	0.498	0.342	0.115878
Tia1	0.107377	0.260954	0.809	0.629	0.495977
mt-Nd5	0.856979	0.260947	0.98	0.98	0.999628
Snrpc	0.312466	0.260925	0.868	0.837	0.850052
Erp29	0.335385	0.26069	0.921	0.832	0.872814
Penk	0.332593	0.260531	0.152	0.099	0.870812
Son	0.784906	0.260459	0.99	0.96	0.999628
Rabl6	0.0265547	0.260449	0.561	0.436	0.215936
Rrm1	0.260802	0.260432	0.446	0.361	0.789381
Nol11	0.0231555	0.25997	0.525	0.381	0.19448
Ppm1g	0.0743328	0.259852	0.733	0.545	0.396896
Rasl11a	0.879759	0.259751	0.921	0.916	0.999628
Lsm8	0.349433	0.259721	0.733	0.683	0.88168
Smarca5	0.366998	0.259673	0.875	0.802	0.895814
Pfdn1	0.356716	0.259511	0.927	0.876	0.886771
Llph	0.183725	0.25945	0.746	0.658	0.663561
Fis1	0.719993	0.259255	0.95	0.95	0.999628
Gtf2a2	0.14598	0.259235	0.802	0.752	0.584552
Cmtm3	0.0155932	0.259063	0.601	0.376	0.147053
Smdt1	0.764964	0.258896	0.974	0.95	0.999628
Kif22	0.529629	0.258862	0.347	0.252	0.999628
Tax1bp3	0.0994826	0.258593	0.795	0.644	0.477331
Fzr1	0.108124	0.258412	0.462	0.342	0.498298
Ssna1	0.111982	0.258368	0.726	0.658	0.507162
Usp1	0.165216	0.258212	0.538	0.356	0.631617
Parva	0.040182	0.258165	0.67	0.48	0.279832
Vamp3	0.0205247	0.258094	0.647	0.475	0.17757
Smu1	0.029919	0.257998	0.667	0.485	0.232614
Arl2bp	0.0357603	0.257998	0.66	0.5	0.260622
Gnai3	0.105943	0.257971	0.749	0.673	0.492706
Nans	0.0280641	0.257928	0.518	0.332	0.222479
Bptf	0.238921	0.257885	0.838	0.757	0.756894
Timm17b	0.0998877	0.257763	0.805	0.683	0.478194
Tsn	0.360421	0.257732	0.871	0.797	0.890525
Selenom	0.487637	0.257717	0.941	0.891	0.985105
Rps15	0.245801	0.257662	1	1	0.768484
Pfdn6	0.109596	0.257552	0.729	0.658	0.501677
Gnas	0.235466	0.257539	1	1	0.751993
Gm16286	0.0529477	0.257453	0.736	0.599	0.327104
Ndufb10	0.575804	0.257349	0.957	0.941	0.999628
Arpc3	0.574511	0.257311	0.947	0.911	0.999628
Atpif1	0.75436	0.256825	0.99	0.985	0.999628
Rlim	0.0133924	0.256591	0.538	0.332	0.133566
Pgls	0.728782	0.25658	0.941	0.881	0.999628
Abce1	0.0399792	0.256527	0.518	0.386	0.279742
Tkt	0.56584	0.256511	0.891	0.842	0.999628
Bud23	0.016046	0.256455	0.558	0.376	0.149934
Rbx1	0.71189	0.256266	0.97	0.931	0.999628
Ctnnb1	0.319952	0.256166	0.914	0.837	0.854744
Ufc1	0.10052	0.256148	0.818	0.703	0.480655
Mettl9	0.464158	0.256027	0.868	0.871	0.973728
Nid1	0.245889	0.255994	0.835	0.743	0.768484
Mphosph10	0.0329296	0.255933	0.554	0.361	0.247977
Hspa9	0.292009	0.255687	0.756	0.624	0.829032
Maz	0.0717922	0.255541	0.726	0.564	0.392592
Ppp1r7	0.0280693	0.255347	0.568	0.411	0.222479
Tiparp	0.0353161	0.255247	0.432	0.297	0.258773
Cope	0.215698	0.255061	0.868	0.772	0.72385
Mrpl35	0.0201731	0.254943	0.607	0.441	0.176799
Ppdpf	0.259262	0.254772	0.848	0.743	0.78824
Rplp1	0.0571737	0.254768	1	1	0.338846
Rpl22	0.357586	0.254614	0.997	1	0.887754
Sri	0.536704	0.254452	0.921	0.911	0.999628
Fam104a	0.532021	0.254425	0.871	0.822	0.999628
Pdia4	0.115355	0.254403	0.752	0.614	0.513657
Lsm3	0.22013	0.254396	0.746	0.624	0.72852
Tmem165	0.0790205	0.254346	0.785	0.604	0.412202
Ccdc34	0.685324	0.254284	0.726	0.649	0.999628
Ube2v2	0.0784919	0.254266	0.776	0.644	0.409969
Tbca	0.900121	0.254213	0.967	0.936	0.999628
Rps20	0.0481176	0.254126	1	1	0.30845
Dera	0.0135219	0.254021	0.521	0.317	0.134121
P3h4	0.0160282	0.253781	0.531	0.337	0.149934
Fjx1	0.0474225	0.253781	0.584	0.46	0.306585
Rbm42	0.0606759	0.253781	0.67	0.545	0.35326
Tecr	0.417978	0.253781	0.888	0.832	0.93617
Lmna	0.989701	0.253694	0.842	0.822	0.999628
Zrsr2	0.0621551	0.253423	0.686	0.52	0.358669
Tmem256	0.419269	0.253337	0.861	0.817	0.936973
mt-Nd3	0.631115	0.25301	0.987	0.97	0.999628
Rnf20	0.0246292	0.252923	0.581	0.411	0.202297
Elof1	0.187918	0.252923	0.746	0.708	0.67274
Rsl1d1	0.217121	0.252556	0.743	0.653	0.726232
Mri1	0.0128166	0.252091	0.515	0.351	0.130211
St13	0.716949	0.251836	0.95	0.921	0.999628
Sec22b	0.0248976	0.251656	0.62	0.421	0.204091
Phip	0.189427	0.251553	0.746	0.668	0.675765
Mrps21	0.259845	0.251453	0.818	0.787	0.78824
Ssr3	0.195171	0.251382	0.861	0.713	0.684863
Pitpna	0.206938	0.251236	0.746	0.688	0.709175
Rpl32	0.0333889	0.251096	1	1	0.250971
Apip	0.0188741	0.25095	0.571	0.386	0.169742
Dbn1	0.11643	0.250726	0.769	0.644	0.514464
Zfp207	0.125095	0.250578	0.772	0.649	0.536544
Nisch	0.268808	0.250561	0.891	0.827	0.801389
Zfand5	0.400158	0.250477	0.861	0.837	0.921041
Ndufb2	0.327569	0.250268	0.812	0.752	0.863948
Fkbp10	0.0613582	0.250204	0.657	0.54	0.355581
Svbp	0.110091	0.250156	0.785	0.668	0.5029
Actn1	0.176298	0.250144	0.842	0.728	0.650548
Pdhb	0.0634406	0.250099	0.667	0.54	0.363001
Rheb	0.417574	0.249972	0.871	0.827	0.93617
Phax	0.087598	0.249896	0.749	0.614	0.43896
Ptges3	0.584285	0.249827	0.858	0.772	0.999628
Naa38	0.0725594	0.249695	0.67	0.545	0.394669
Ctcf	0.532008	0.24937	0.782	0.762	0.999628
Apex1	0.118486	0.24924	0.647	0.495	0.519842
Scaf1	0.0113528	0.249181	0.525	0.292	0.118898
Flna	0.403563	0.248989	0.954	0.901	0.926125
Atp5d	0.636185	0.248836	1	0.965	0.999628
Lap3	0.0743088	0.24868	0.594	0.49	0.396896
Igf1	0.073505	0.248623	0.261	0.153	0.395587
Lims1	0.246359	0.248461	0.779	0.653	0.768484
Trim35	0.2177	0.247901	0.848	0.718	0.727479
Plagl1	0.0411019	0.247866	0.366	0.213	0.283812
Rars	0.0952807	0.247814	0.627	0.49	0.461326
Cfdp1	0.771838	0.24764	0.937	0.896	0.999628
Bgn	0.293143	0.247547	0.927	0.881	0.829927
Cdk12	0.0432326	0.247408	0.627	0.5	0.291123
Aprt	0.477264	0.247382	0.703	0.639	0.980599
Notch1	0.0693952	0.247331	0.594	0.455	0.385167
Rasgrp2	0.866054	0.247182	0.917	0.891	0.999628
Zfp148	0.0856323	0.247081	0.686	0.564	0.431765
Hdac2	0.235131	0.246903	0.762	0.703	0.751902
Atox1	0.43846	0.246893	0.884	0.817	0.955234
Exosc5	0.0394139	0.24686	0.561	0.386	0.277807
Rbmx	0.178851	0.246762	0.683	0.629	0.655937
Ewsr1	0.494762	0.246537	0.858	0.772	0.989038
Tial1	0.0307795	0.246524	0.545	0.376	0.237043
Grb10	0.154142	0.246364	0.888	0.782	0.607912
Ndufa3	0.613412	0.246333	0.957	0.856	0.999628
Hnrnpc	0.953638	0.246326	0.947	0.931	0.999628
Tsg101	0.046203	0.246256	0.653	0.5	0.302519
Zc3h13	0.172455	0.246231	0.719	0.594	0.645756
Lamtor1	0.4545	0.246162	0.855	0.782	0.964136
Mrps36	0.0746845	0.246149	0.696	0.535	0.397292
Mapre1	0.623707	0.246143	0.835	0.817	0.999628
Prc1	0.688986	0.246102	0.36	0.257	0.999628
Ccdc174	0.0479976	0.246099	0.66	0.525	0.308426
Luc7l2	0.474952	0.246083	0.911	0.866	0.980599
Stoml2	0.129588	0.245935	0.726	0.624	0.547761
Smc4	0.497995	0.245935	0.617	0.559	0.992579
Rpl28	0.019208	0.245877	0.997	1	0.1715
Mrpl17	0.211083	0.245747	0.789	0.644	0.719024
Ctbp1	0.180598	0.245687	0.759	0.663	0.656925
Gpn1	0.0196301	0.245659	0.403	0.183	0.173102
Meis2	0.937063	0.245659	0.934	0.911	0.999628
Oaz2	0.40609	0.245655	0.848	0.777	0.928008
Pole3	0.0654995	0.245653	0.525	0.416	0.370618
Dnajc2	0.173605	0.245557	0.64	0.53	0.646149
mt-Co3	NA	0.24551	1	0.99	NA
Abcf1	0.301312	0.245429	0.858	0.762	0.838487
Hook3	0.0938907	0.245335	0.749	0.614	0.458097
Sec62	0.531664	0.245271	0.977	0.931	0.999628
Dynlrb1	0.572314	0.245249	0.937	0.861	0.999628
Ubqln2	0.0194969	0.245122	0.512	0.337	0.172645
Trappc4	0.18533	0.245122	0.729	0.693	0.666404
Naa35	0.055454	0.244997	0.63	0.47	0.334201
0610010K14Rik	0.0597308	0.244871	0.614	0.475	0.349631
Id3	0.314053	0.244799	0.99	0.99	0.850453
Rrp1	0.695198	0.244757	0.921	0.901	0.999628
Dnajc10	0.0415325	0.244744	0.644	0.485	0.284476
Selenok	0.691711	0.244408	0.95	0.911	0.999628
Arl2	0.0362337	0.244385	0.505	0.371	0.26313
Eif4ebp1	0.13809	0.24434	0.627	0.515	0.569528
Hspa14	0.106346	0.244078	0.597	0.46	0.493455
Clic1	0.748445	0.244071	0.99	0.95	0.999628
Cyb5a	0.358782	0.243777	0.858	0.762	0.888559
Vps72	0.0761015	0.243763	0.713	0.53	0.403165
Esam	0.158726	0.243476	0.535	0.47	0.618805
Gcsh	0.0513177	0.243371	0.535	0.376	0.322637
Hmgn5	0.0714953	0.243362	0.545	0.361	0.392015
Rps16	0.00172065	0.243235	1	1	0.0310777
Prkag1	0.0282166	0.242924	0.502	0.332	0.223213
Ube2n	0.629088	0.242898	0.832	0.827	0.999628
Ddah1	0.634385	0.242482	0.729	0.688	0.999628
mt-Nd2	NA	0.242461	1	0.99	NA
Idh3a	0.0407421	0.24241	0.518	0.337	0.281805
Pdlim7	0.407866	0.242265	0.759	0.644	0.929853
Serf1	0.314815	0.24224	0.865	0.777	0.850502
Pbdc1	0.0668855	0.24222	0.611	0.421	0.375333
Ndufa8	0.599988	0.242186	0.927	0.851	0.999628
Mrpl42	0.467213	0.24214	0.805	0.733	0.974387
Rhoj	0.110586	0.241936	0.62	0.475	0.504511
Emc6	0.183417	0.241836	0.706	0.564	0.663037
Ccnd3	0.193477	0.241745	0.785	0.678	0.681855
Uchl3	0.188826	0.241638	0.604	0.515	0.674806
Cers2	0.0615034	0.241577	0.627	0.475	0.355916
Gng2	0.0389919	0.241342	0.356	0.228	0.276266
Hist1h1c	0.12019	0.241311	0.396	0.312	0.525248
Mrpl28	0.242803	0.241263	0.776	0.649	0.762637
Kdelr3	0.023851	0.241162	0.426	0.223	0.197498
Pitpnb	0.0406106	0.241162	0.627	0.446	0.281373
Smarca4	0.186376	0.241045	0.644	0.589	0.669575
H3f3a	0.353204	0.240949	1	1	0.883788
Rfc3	0.180243	0.240906	0.531	0.366	0.656808
Acta2	0.324034	0.240884	0.881	0.762	0.85945
Ndufs1	0.0350596	0.240862	0.571	0.436	0.258499
Eif1b	0.542017	0.240725	0.888	0.822	0.999628
Cggbp1	0.311613	0.24059	0.779	0.728	0.850052
Syncrip	0.308832	0.240522	0.772	0.644	0.848975
Ak6	0.0791892	0.240429	0.528	0.386	0.412554
Timm50	0.141961	0.240385	0.558	0.436	0.576797
Npm3	0.314058	0.240342	0.686	0.649	0.850453
Mif	0.669084	0.240271	0.97	0.946	0.999628
Got2	0.0400431	0.240216	0.515	0.371	0.279742
Dhx9	0.193277	0.240207	0.667	0.53	0.681742
Tulp4	0.024174	0.24018	0.498	0.312	0.199362
Dhfr	0.232279	0.24018	0.33	0.228	0.749767
Sh3bgrl3	0.653579	0.240088	0.894	0.817	0.999628
0610012G03Rik	0.281394	0.240079	0.769	0.733	0.82054
Cox6a1	0.981593	0.240067	0.944	0.896	0.999628
Rack1	0.0492653	0.240066	1	1	0.313472
Polr2f	0.381631	0.239943	0.818	0.713	0.905025
Pth1r	0.282359	0.23994	0.723	0.599	0.82054
1110038F14Rik	0.152835	0.239891	0.746	0.668	0.604516
Traf4	0.184042	0.23986	0.752	0.673	0.663898
Serf2	0.520598	0.23983	0.993	1	0.999628
Supt5	0.032489	0.239779	0.554	0.401	0.245819
Cops3	0.146066	0.239673	0.693	0.569	0.584552
Hspa4	0.408609	0.23961	0.792	0.713	0.929985
Snrpb2	0.310557	0.239577	0.799	0.782	0.850052
Bin1	0.0233556	0.239563	0.561	0.351	0.195381
Cxxc5	0.135395	0.239497	0.607	0.515	0.565362
Mcrs1	0.114553	0.239464	0.68	0.559	0.513657
Cops8	0.0822863	0.23923	0.68	0.53	0.421678
Bsg	0.946545	0.239151	0.99	0.96	0.999628
Rbm39	0.350835	0.239026	0.993	0.995	0.882197
Ublcp1	0.0440057	0.238969	0.578	0.421	0.294383
Gnb2	0.563044	0.238908	0.997	0.99	0.999628
Cops4	0.279454	0.238892	0.828	0.733	0.819964
Nars	0.450009	0.238892	0.785	0.708	0.962705
Ralb	0.142501	0.238831	0.686	0.584	0.578236
Adrm1	0.235729	0.238664	0.749	0.639	0.751993
Psmd11	0.459106	0.238605	0.769	0.733	0.968115
Gstm5	0.113347	0.238411	0.673	0.545	0.511382
Psmd14	0.10782	0.238041	0.657	0.53	0.497462
Vps29	0.4549	0.238023	0.785	0.743	0.964136
Ifitm2	0.434807	0.237885	0.993	1	0.951855
Dlgap4	0.0859083	0.237785	0.617	0.465	0.432087
Gamt	0.399107	0.237748	0.762	0.728	0.919662
Tcf25	0.389701	0.237588	0.894	0.807	0.910728
Ppp1cc	0.802246	0.237581	0.875	0.797	0.999628
Nrbp1	0.148311	0.237575	0.733	0.599	0.590192
Nol7	0.577574	0.237512	0.828	0.797	0.999628
Fh1	0.246594	0.23742	0.729	0.658	0.768484
Top2b	0.771088	0.237342	0.878	0.832	0.999628
Nxf1	0.351189	0.237284	0.851	0.748	0.882197
Spc24	0.732197	0.237284	0.465	0.386	0.999628
Bod1	0.106916	0.237186	0.703	0.579	0.494972
Ska2	0.106745	0.237066	0.317	0.134	0.494742
Nab1	0.966588	0.236769	0.729	0.708	0.999628
Psmg4	0.0346494	0.236737	0.548	0.376	0.257125
Nap1l4	0.246918	0.236607	0.789	0.639	0.768484
Cyr61	0.555538	0.236583	0.663	0.564	0.999628
Fxn	0.0474852	0.236564	0.515	0.337	0.306585
Cryab	0.259277	0.236548	0.251	0.149	0.78824
Sdc1	0.0322144	0.236389	0.455	0.307	0.245311
Ssr1	0.0695012	0.236242	0.644	0.495	0.385167
Marcks	0.742898	0.236221	0.96	0.886	0.999628
Emid1	0.4801	0.236193	0.743	0.658	0.981135
Bnip2	0.349816	0.236182	0.835	0.698	0.88168
Eif3m	0.720797	0.236127	0.954	0.96	0.999628
Mthfd2	0.222844	0.235981	0.314	0.158	0.734939
Polr2m	0.866903	0.235924	0.937	0.916	0.999628
Nrep	0.150619	0.235917	0.723	0.678	0.596553
Armc1	0.0453338	0.235906	0.647	0.45	0.300356
Dnajb4	0.0574546	0.235857	0.479	0.312	0.339232
Ap2m1	0.556859	0.235857	0.878	0.822	0.999628
Pdcd10	0.387438	0.235749	0.776	0.668	0.910728
Ddx6	0.128943	0.235705	0.686	0.564	0.547761
Ripk3	0.13719	0.235626	0.396	0.248	0.569374
Sf3b3	0.184345	0.235626	0.703	0.604	0.664033
Zfp664	0.0336984	0.235383	0.594	0.361	0.252366
Fkbp9	0.0732438	0.235314	0.604	0.465	0.395587
Wdr75	0.0423513	0.235145	0.389	0.203	0.288046
Gdi2	0.747883	0.235135	0.934	0.916	0.999628
Aamp	0.744866	0.234912	0.898	0.847	0.999628
2022-03-07	0.0746994	0.234884	0.647	0.505	0.397292
Guk1	0.109099	0.234671	0.63	0.5	0.499966
Ctxn1	0.292422	0.234613	0.719	0.634	0.829615
Col18a1	0.040576	0.234518	0.455	0.376	0.281373
Cenpx	0.322363	0.23449	0.69	0.564	0.85781
Rpn1	0.176569	0.234447	0.729	0.584	0.650548
Smim11	0.201348	0.234447	0.752	0.639	0.697133
Pin4	0.159287	0.234438	0.719	0.545	0.619152
Bax	0.885451	0.234381	0.937	0.876	0.999628
Ndufs5	0.983746	0.234114	0.947	0.901	0.999628
Wtip	0.281755	0.234098	0.845	0.792	0.82054
Mydgf	0.127292	0.233969	0.69	0.559	0.542454
Rac1	0.979486	0.233839	0.904	0.876	0.999628
Nsd2	0.115937	0.233777	0.512	0.401	0.514365
Immp1l	0.118478	0.233761	0.677	0.574	0.519842
Ubn1	0.210759	0.233615	0.766	0.649	0.718521
Tmem9	0.0303165	0.233514	0.472	0.282	0.234808
Nop16	0.101158	0.233311	0.399	0.267	0.481226
Eif6	0.394203	0.233275	0.782	0.733	0.914385
Samm50	0.30519	0.233247	0.733	0.663	0.844663
Dnaja2	0.445166	0.233235	0.858	0.777	0.959185
Rpl17	0.00356986	0.233234	1	1	0.0521277
Ptpa	0.0695806	0.233168	0.538	0.431	0.385167
Hmgn3	0.515442	0.232759	0.812	0.728	0.998966
Ctnnbip1	0.101903	0.232675	0.657	0.505	0.481226
Vdac2	0.655523	0.232604	0.934	0.946	0.999628
Tspan31	0.112632	0.232516	0.63	0.5	0.508716
Eif4e	0.271052	0.232446	0.703	0.559	0.804715
Rps19bp1	0.0630944	0.232383	0.535	0.431	0.362037
Cuedc2	0.239445	0.232263	0.825	0.673	0.756967
Exoc7	0.0426877	0.232065	0.571	0.411	0.288408
Rps6	0.0087033	0.231954	1	1	0.0998796
Prkra	0.129416	0.231834	0.637	0.554	0.547761
Polr2d	0.0869748	0.231593	0.571	0.431	0.436373
Tmed2	0.518842	0.231469	0.875	0.817	0.999628
Lbhd2	0.415426	0.231282	0.337	0.277	0.935285
Snrnp27	0.452538	0.231264	0.845	0.733	0.963743
Brd3	0.693392	0.23123	0.851	0.762	0.999628
Rpl35a	0.000846631	0.231048	1	1	0.0183467
Ppig	0.653243	0.23094	0.894	0.787	0.999628
Crebbp	0.0793946	0.230866	0.614	0.455	0.412937
Tfg	0.0849732	0.230866	0.617	0.475	0.430038
Idh3g	0.194664	0.230813	0.7	0.599	0.684855
Ncapg	0.284035	0.230734	0.337	0.193	0.82054
Lta4h	0.0415472	0.230727	0.508	0.322	0.284476
Tshz2	0.253515	0.230659	0.624	0.515	0.777725
Mrpl39	0.0321893	0.230524	0.479	0.292	0.245311
Exosc4	0.0845542	0.230524	0.67	0.485	0.428983
Ppp1r2	0.203157	0.230387	0.759	0.614	0.702003
Cnpy2	0.690249	0.230351	0.927	0.886	0.999628
Csde1	0.548375	0.230312	0.805	0.762	0.999628
Uqcrfs1	0.899321	0.230107	0.881	0.871	0.999628
Actr10	0.400819	0.230085	0.835	0.703	0.921522
Rest	0.603393	0.230085	0.822	0.767	0.999628
Palm	0.0709695	0.229989	0.578	0.421	0.391155
Ddx21	0.306067	0.229974	0.611	0.465	0.844794
Rbfox2	0.379582	0.2299	0.802	0.644	0.904009
Fhl2	0.885902	0.229884	0.924	0.911	0.999628
Mplkip	0.0523947	0.229767	0.551	0.356	0.325887
Ckap5	0.38004	0.229753	0.528	0.411	0.904009
Capns1	0.789958	0.229728	0.941	0.916	0.999628
Zfp326	0.165315	0.229639	0.696	0.564	0.631617
Fam49b	0.0425716	0.229484	0.469	0.312	0.288101
Mef2c	0.648066	0.229424	0.941	0.941	0.999628
Pofut2	0.172879	0.229281	0.65	0.525	0.645808
Racgap1	0.699774	0.229281	0.373	0.262	0.999628
S100a16	0.136544	0.22923	0.294	0.223	0.568162
Tmem208	0.0920414	0.229186	0.591	0.475	0.451236
Ddx24	0.371956	0.229161	0.759	0.723	0.90018
Eif3e	0.6926	0.229057	0.967	0.936	0.999628
Xpnpep1	0.115548	0.228715	0.653	0.505	0.513911
Actl6a	0.274585	0.228633	0.713	0.594	0.8118
Prdx5	0.901322	0.228452	0.914	0.851	0.999628
Akap12	0.326398	0.228399	0.766	0.639	0.862351
Hddc2	0.0485904	0.228393	0.538	0.366	0.309792
Rpf2	0.0802785	0.22812	0.465	0.262	0.415188
Arpc5	0.792825	0.228115	0.934	0.851	0.999628
Srsf9	0.89854	0.228051	0.871	0.871	0.999628
Abhd8	0.0559874	0.228044	0.465	0.342	0.335577
Sox11	0.214963	0.227876	0.34	0.193	0.721979
Nudcd3	0.182306	0.227624	0.683	0.554	0.660779
Pmpcb	0.199217	0.227514	0.749	0.614	0.693683
Cdkn3	0.392417	0.22739	0.284	0.173	0.913136
Cd81	0.453944	0.227311	0.997	1	0.964136
Mrps17	0.315489	0.227265	0.726	0.634	0.851181
Tardbp	0.233032	0.227057	0.696	0.54	0.750096
Stard3nl	0.0738759	0.226958	0.548	0.371	0.396329
Glo1	0.174844	0.226904	0.749	0.599	0.648724
Zranb2	0.68099	0.226897	0.865	0.802	0.999628
Mrpl32	0.121258	0.22689	0.7	0.55	0.528159
Plin3	0.0893417	0.226882	0.67	0.55	0.443335
Emp1	0.106222	0.226811	0.343	0.168	0.49344
Ssbp1	0.316274	0.226784	0.729	0.624	0.851181
Ube2f	0.0435499	0.226741	0.558	0.342	0.291813
Parp1	0.102114	0.226688	0.541	0.426	0.481495
Mad2l1	0.282642	0.226528	0.363	0.272	0.82054
Mtch2	0.205406	0.226505	0.64	0.564	0.706181
mt-Atp6	0.560232	0.226503	1	1	0.999628
Csnk1a1	0.519094	0.22648	0.99	0.955	0.999628
Mtx2	0.409065	0.226471	0.785	0.713	0.930502
Dcps	0.0695835	0.226471	0.541	0.391	0.385167
Pmvk	0.0400419	0.226402	0.502	0.332	0.279742
Lsm1	0.0805765	0.226124	0.607	0.426	0.415188
Mrps25	0.126008	0.226055	0.584	0.455	0.537548
Vti1b	0.0529156	0.225505	0.462	0.322	0.327104
Dtnbp1	0.190738	0.225369	0.653	0.579	0.678068
Eml4	0.288823	0.225339	0.729	0.599	0.824572
Dctn6	0.0761182	0.22532	0.545	0.391	0.403165
Ctdnep1	0.0673306	0.225264	0.571	0.411	0.376733
Cfl2	0.511382	0.225242	0.878	0.802	0.998231
Umps	0.142683	0.225102	0.389	0.238	0.5784
Adh5	0.629252	0.225079	0.861	0.787	0.999628
Ndufv2	0.827724	0.224934	0.894	0.856	0.999628
Serinc1	0.166204	0.224926	0.766	0.629	0.633411
Brk1	0.820579	0.224846	0.911	0.876	0.999628
Hirip3	0.674196	0.224801	0.446	0.356	0.999628
Bub1b	0.411491	0.224581	0.29	0.183	0.933396
Tubb6	0.762461	0.224531	0.469	0.337	0.999628
Wapl	0.124897	0.224443	0.663	0.48	0.536544
Srsf1	0.223164	0.224361	0.667	0.545	0.734978
Eif3f	0.488129	0.224353	0.987	0.975	0.985105
Jup	0.0584787	0.224236	0.363	0.163	0.344281
Hspa13	0.0711326	0.224009	0.564	0.376	0.391155
Mettl1	0.0833298	0.223892	0.393	0.223	0.425081
Tmpo	0.974548	0.223552	0.703	0.594	0.999628
Bola3	0.172904	0.22352	0.568	0.465	0.645808
Pole4	0.125686	0.223328	0.617	0.47	0.5373
Fubp1	0.905741	0.223226	0.927	0.847	0.999628
Bloc1s1	0.0457076	0.223144	0.452	0.277	0.301804
Ltv1	0.0974122	0.223144	0.439	0.317	0.469654
Rps24	1e-05	0.222887	1	1	0.000657822
Crabp1	0.19683	0.222865	0.221	0.104	0.688461
Polr2i	0.400771	0.222865	0.822	0.683	0.921522
Myl9	0.746827	0.222684	0.848	0.777	0.999628
Wdfy1	0.0493984	0.222618	0.389	0.213	0.313472
Hoxb2	0.21964	0.222607	0.581	0.475	0.727959
Atic	0.0918714	0.222479	0.502	0.322	0.450944
Cops9	0.689612	0.222356	0.871	0.807	0.999628
Hells	0.44609	0.22234	0.36	0.252	0.959275
Pyurf	0.0467804	0.22223	0.508	0.322	0.30482
Trp53	0.384155	0.222104	0.683	0.609	0.908855
Kif2c	0.556245	0.221965	0.257	0.168	0.999628
Mrpl40	0.0608351	0.221724	0.482	0.292	0.353555
Mki67	0.654414	0.221691	0.403	0.297	0.999628
Wbp11	0.346552	0.22162	0.703	0.579	0.880207
Abracl	0.871471	0.221566	0.848	0.822	0.999628
Krcc1	0.306047	0.221532	0.713	0.644	0.844794
Tmed10	0.776059	0.221527	0.947	0.906	0.999628
2610524H06Rik	0.10839	0.221388	0.495	0.376	0.49896
Scp2	0.525643	0.221377	0.835	0.678	0.999628
Dynll2	0.212862	0.221161	0.696	0.535	0.720247
Hist1h2ab	0.490397	0.221058	0.191	0.149	0.986536
Casp8ap2	0.179274	0.220991	0.528	0.342	0.655937
C1qtnf12	0.0639816	0.220743	0.465	0.307	0.363037
Rraga	0.371324	0.220605	0.759	0.649	0.900145
Mbd2	0.294732	0.220559	0.782	0.649	0.830962
Hnrnpr	0.984274	0.2205	0.917	0.861	0.999628
Nradd	0.0594002	0.220414	0.439	0.287	0.348196
Ap3s1	0.111735	0.220378	0.601	0.49	0.507162
Rcc2	0.254125	0.220038	0.492	0.426	0.779006
Zfp637	0.0837018	0.219944	0.561	0.386	0.426251
Kras	0.278708	0.219838	0.65	0.49	0.819823
Hsbp1	0.949067	0.219726	0.937	0.856	0.999628
Tmem183a	0.0880746	0.219677	0.479	0.317	0.439118
Trim27	0.137342	0.219589	0.634	0.45	0.569374
Ccdc80	0.875267	0.219557	0.927	0.842	0.999628
Cst3	0.957878	0.219487	0.977	0.946	0.999628
Phf3	0.586528	0.219425	0.822	0.723	0.999628
Ndufaf4	0.0568044	0.219363	0.416	0.257	0.338335
Hdgfl2	0.218487	0.219363	0.587	0.515	0.727479
Mpc1	0.505305	0.218977	0.799	0.683	0.996292
Map4k4	0.710269	0.21891	0.868	0.827	0.999628
Rtn4	0.931392	0.218735	0.95	0.921	0.999628
Dlat	0.0637418	0.218689	0.452	0.267	0.363037
Sf3a2	0.0858097	0.218689	0.416	0.282	0.432087
Cpsf2	0.0794655	0.218573	0.548	0.381	0.412937
Hpf1	0.250543	0.218512	0.667	0.545	0.774733
Sf3b4	0.161955	0.218482	0.571	0.441	0.625999
Psmd5	0.0572228	0.218424	0.442	0.262	0.338846
Myl6	0.596421	0.218328	1	1	0.999628
Mrps7	0.317516	0.218269	0.729	0.624	0.852709
Tcerg1	0.223839	0.218219	0.66	0.485	0.736314
Knstrn	0.744348	0.218219	0.429	0.361	0.999628
Spr	0.0667132	0.21821	0.528	0.347	0.374882
Rpl13a	0.404958	0.218163	0.977	0.975	0.927897
Rpl18a	1.24e-05	0.218065	1	1	0.000775363
Tmem234	0.857977	0.218052	0.875	0.837	0.999628
2410015M20Rik	0.982503	0.217987	0.871	0.812	0.999628
Hadhb	0.243293	0.217949	0.69	0.554	0.762637
Pgp	0.484431	0.217913	0.686	0.604	0.982772
Pdzd11	0.115785	0.217812	0.571	0.426	0.514365
Dcun1d5	0.490897	0.217812	0.776	0.688	0.986536
Rcbtb2	0.137824	0.217765	0.627	0.49	0.569528
Sf3b2	0.620427	0.21774	0.921	0.926	0.999628
Mis18bp1	0.708235	0.217723	0.294	0.228	0.999628
Drap1	0.892417	0.217705	0.957	0.881	0.999628
Utp3	0.754062	0.217593	0.799	0.767	0.999628
Dynlt1f	0.18322	0.21759	0.512	0.416	0.662913
Eif3d	0.88815	0.217325	0.868	0.822	0.999628
Tmco1	0.47137	0.217301	0.828	0.708	0.97758
Lman2	0.175891	0.21726	0.713	0.51	0.650548
Ap2s1	0.996762	0.217099	0.904	0.842	0.999628
Dnajb6	0.86573	0.217065	0.865	0.861	0.999628
Xrn2	0.591629	0.217019	0.802	0.718	0.999628
Vim	0.0706682	0.216954	1	0.995	0.390111
Sf3a3	0.316214	0.216946	0.67	0.554	0.851181
Tcea1	0.485549	0.216795	0.776	0.683	0.982772
Ptpn1	0.216943	0.216671	0.67	0.52	0.726232
Ube2d2a	0.647408	0.216641	0.848	0.807	0.999628
Cpsf6	0.286887	0.216639	0.706	0.569	0.823706
Eif2b2	0.138398	0.216555	0.578	0.421	0.569528
Naa10	0.259275	0.216367	0.67	0.535	0.78824
Timp2	0.466059	0.216341	0.785	0.708	0.9738
Ube2k	0.726917	0.216257	0.815	0.748	0.999628
Hadh	0.381648	0.216141	0.762	0.663	0.905025
Hmox2	0.314354	0.216093	0.706	0.649	0.850453
Orc6	0.169708	0.21601	0.521	0.351	0.637816
Smad4	0.163697	0.215962	0.64	0.495	0.629746
Dnttip1	0.179853	0.215915	0.653	0.49	0.655973
H2-D1	0.267286	0.215642	0.261	0.059	0.799504
Psat1	0.236538	0.215596	0.343	0.203	0.751993
Map7d1	0.138079	0.215361	0.62	0.446	0.569528
Asf1a	0.231927	0.215361	0.677	0.55	0.749303
Clpp	0.16728	0.215326	0.62	0.47	0.634231
Cul1	0.472856	0.215111	0.736	0.663	0.979368
Rap1b	0.808295	0.215073	0.818	0.802	0.999628
Ccdc59	0.292982	0.215059	0.729	0.569	0.829927
Map2k3	0.115069	0.215011	0.541	0.421	0.513657
Cd320	0.0719615	0.214992	0.459	0.272	0.392991
Hnrnpul2	0.287967	0.214877	0.716	0.569	0.823706
Med10	0.115264	0.21475	0.568	0.446	0.513657
Tfam	0.127635	0.21475	0.541	0.411	0.543349
Nsfl1c	0.360418	0.214675	0.723	0.634	0.890525
Gatad1	0.467096	0.21459	0.736	0.658	0.974387
Smarcd1	0.14064	0.214538	0.568	0.421	0.574114
Rnps1	0.465248	0.214436	0.683	0.594	0.9738
Polr2g	0.501139	0.214244	0.743	0.683	0.993498
Tacc3	0.896022	0.214191	0.343	0.292	0.999628
Taf15	0.304628	0.214169	0.63	0.53	0.843681
Ccnl2	0.316738	0.214148	0.743	0.569	0.851181
Ndufv1	0.772606	0.214	0.802	0.743	0.999628
2010107E04Rik	0.628907	0.21393	0.934	0.906	0.999628
Ccdc58	0.0806158	0.213855	0.426	0.297	0.415188
Ift74	0.268001	0.213789	0.597	0.51	0.801055
Mrpl14	0.567504	0.213423	0.785	0.663	0.999628
Cotl1	0.385756	0.213381	0.614	0.495	0.910001
Serpine2	0.895084	0.213286	0.888	0.827	0.999628
Pcmt1	0.43706	0.213234	0.736	0.649	0.953203
Mphosph8	0.360451	0.213193	0.67	0.51	0.890525
Rsu1	0.697332	0.213153	0.924	0.896	0.999628
Aurkb	0.930282	0.213149	0.281	0.223	0.999628
Las1l	0.0779424	0.213034	0.462	0.327	0.409198
Tars	0.121604	0.213034	0.446	0.287	0.528159
Ndufs3	0.867154	0.213006	0.792	0.772	0.999628
Mpp6	0.673134	0.212922	0.637	0.594	0.999628
Kpna4	0.19418	0.212895	0.591	0.46	0.683742
Git2	0.125963	0.212834	0.568	0.431	0.537548
Rpp30	0.116216	0.212719	0.393	0.252	0.514464
Rangap1	0.385163	0.212411	0.389	0.297	0.910001
Sptssa	0.68396	0.212284	0.779	0.723	0.999628
Parl	0.116029	0.212274	0.472	0.327	0.514365
mt-Atp8	0.693952	0.212253	0.95	0.901	0.999628
Tspan3	0.567223	0.21224	0.937	0.807	0.999628
App	0.648549	0.21194	0.95	0.96	0.999628
Snrpa	0.669747	0.211927	0.785	0.723	0.999628
Pop5	0.373949	0.211829	0.66	0.589	0.901593
Psma5	0.753797	0.211482	0.898	0.871	0.999628
Fundc1	0.08522	0.211435	0.393	0.213	0.430752
Fam107b	0.229313	0.21143	0.66	0.545	0.744398
Polr2k	0.392465	0.211196	0.683	0.663	0.913136
Prkar1a	0.598036	0.211194	0.957	0.946	0.999628
Rpl7l1	0.545125	0.211177	0.799	0.688	0.999628
Yaf2	0.734587	0.211163	0.832	0.748	0.999628
Csrp1	0.773742	0.21111	0.769	0.718	0.999628
Usp50	0.0917948	0.211081	0.449	0.312	0.450944
Trappc5	0.395	0.211071	0.657	0.554	0.914385
Kif20b	0.906985	0.21091	0.31	0.228	0.999628
Eif3g	0.768505	0.210903	0.809	0.723	0.999628
Cops7a	0.120289	0.210787	0.482	0.351	0.525248
Wdr43	0.426758	0.210625	0.644	0.515	0.942353
Mcm6	0.523966	0.210619	0.452	0.366	0.999628
Etfa	0.39096	0.210575	0.69	0.559	0.912121
Rab5c	0.341536	0.210485	0.749	0.609	0.877861
Ndufa9	0.347171	0.210433	0.713	0.634	0.880682
Paip2	0.607054	0.210385	0.947	0.916	0.999628
Csnk1g2	0.75444	0.210339	0.802	0.757	0.999628
Nfib	0.204961	0.210233	0.601	0.455	0.705621
Rrp9	0.16849	0.210156	0.34	0.178	0.635581
Atg3	0.117214	0.210149	0.528	0.401	0.516808
Ociad1	0.255089	0.210145	0.683	0.52	0.780792
Zc3h15	0.564787	0.210124	0.901	0.856	0.999628
Spcs2	0.747303	0.210059	0.96	0.946	0.999628
Mrpl58	0.876849	0.21002	0.818	0.733	0.999628
Mrpl38	0.118248	0.209893	0.558	0.401	0.519842
9130401M01Rik	0.0951886	0.209822	0.426	0.233	0.461326
Triobp	0.139421	0.209809	0.518	0.371	0.57184
Jkamp	0.129613	0.209803	0.591	0.47	0.547761
Taf11	0.199604	0.209644	0.624	0.545	0.694437
Mfap2	0.477193	0.209625	0.842	0.752	0.980599
Skp1a	0.778181	0.209622	0.842	0.748	0.999628
Klhdc10	0.100788	0.209614	0.383	0.208	0.480809
Cops5	0.836368	0.209564	0.789	0.713	0.999628
Plpp2	0.135055	0.209544	0.439	0.302	0.564902
Ywhaz	0.80835	0.209539	0.891	0.866	0.999628
Airn	0.104307	0.209466	0.538	0.411	0.488443
Ost4	0.792784	0.209377	0.822	0.782	0.999628
Gmfb	0.12543	0.20921	0.393	0.262	0.536793
Mpdu1	0.0895203	0.209137	0.465	0.287	0.443416
Timm22	0.269294	0.209126	0.634	0.52	0.801389
Zyx	0.196872	0.209075	0.627	0.475	0.688461
Sgo1	0.658162	0.20907	0.287	0.208	0.999628
Gpx8	0.621046	0.208967	0.789	0.698	0.999628
Cenpq	0.33461	0.208959	0.34	0.238	0.872814
Vapa	0.819656	0.208953	0.875	0.871	0.999628
Knop1	0.82581	0.208803	0.729	0.688	0.999628
Ncbp1	0.148345	0.208719	0.393	0.267	0.590192
Lamc1	0.146786	0.208694	0.561	0.416	0.586039
Qk	0.801203	0.208666	0.779	0.738	0.999628
Sh3glb1	0.77067	0.208627	0.891	0.866	0.999628
Gde1	0.150676	0.208614	0.62	0.475	0.596553
Mrpl21	0.636706	0.208444	0.706	0.639	0.999628
Ddx3x	0.389574	0.208368	0.686	0.584	0.910728
Nol12	0.155121	0.208288	0.545	0.396	0.610546
Col4a2	0.689736	0.208282	0.96	0.941	0.999628
Dstn	0.701336	0.20819	0.974	0.965	0.999628
Naxe	0.384617	0.208145	0.716	0.614	0.90942
Ccnh	0.105568	0.208064	0.518	0.337	0.491526
Uba5	0.133667	0.207895	0.624	0.436	0.560245
Cyb5r3	0.843389	0.207865	0.815	0.743	0.999628
Vmp1	0.217005	0.207756	0.627	0.505	0.726232
Wnk1	0.518886	0.207735	0.733	0.619	0.999628
Clk1	0.823145	0.207723	0.769	0.738	0.999628
Gtf2e2	0.288257	0.207639	0.65	0.525	0.823706
Pls3	0.629063	0.207639	0.739	0.639	0.999628
Ruvbl2	0.32457	0.207523	0.548	0.431	0.860311
Ndufs8	0.825849	0.207407	0.818	0.802	0.999628
Kmt5a	0.852943	0.207351	0.653	0.569	0.999628
Stard3	0.0844175	0.207347	0.495	0.332	0.428824
Scaf11	0.994366	0.207347	0.772	0.708	0.999628
Tfdp1	0.199214	0.207228	0.452	0.322	0.693683
Mrps24	0.895933	0.2072	0.878	0.772	0.999628
Ndufb3	0.708091	0.207168	0.828	0.728	0.999628
Gtpbp4	0.377605	0.207127	0.637	0.579	0.903856
Chchd4	0.146684	0.207052	0.416	0.297	0.586039
Ube2j2	0.224894	0.207052	0.624	0.55	0.737697
Rbmxl1	0.698848	0.207024	0.762	0.713	0.999628
Rock1	0.989656	0.206967	0.908	0.876	0.999628
Tspan15	0.177941	0.206887	0.36	0.257	0.653679
Mrpl36	0.222038	0.206815	0.614	0.5	0.733051
Rbm18	0.103505	0.206794	0.541	0.361	0.486929
Psme2	0.3355	0.206625	0.716	0.644	0.872814
Emc8	0.374647	0.20654	0.686	0.559	0.901593
Sdf4	0.312915	0.206466	0.663	0.589	0.850052
Bub1	0.442992	0.206457	0.307	0.188	0.958847
Vps35	0.333358	0.20625	0.653	0.54	0.872256
Ktn1	0.710597	0.20625	0.917	0.916	0.999628
Idh1	0.271201	0.206189	0.551	0.441	0.804715
Slc25a17	0.131293	0.20611	0.492	0.366	0.553127
Mettl6	0.122532	0.206049	0.347	0.153	0.530494
Gfer	0.122008	0.205826	0.492	0.376	0.52935
Ccdc86	0.142988	0.205765	0.403	0.252	0.578485
Rpap3	0.144707	0.205744	0.465	0.297	0.582538
Aldh7a1	0.213047	0.205694	0.604	0.475	0.720247
Snn	0.115163	0.205669	0.386	0.203	0.513657
Hist1h1e	0.735169	0.205512	0.607	0.629	0.999628
Cript	0.390514	0.205444	0.729	0.644	0.911722
Dnajb11	0.236609	0.205366	0.647	0.475	0.751993
Smarcc1	0.729009	0.205346	0.818	0.698	0.999628
Prpf38b	0.720776	0.205263	0.736	0.678	0.999628
Rbms1	0.973761	0.205142	0.818	0.752	0.999628
Atp6v0d1	0.397098	0.205095	0.762	0.619	0.916587
Rps19	1.07e-07	0.20486	0.997	1	1.22e-05
Ckap2l	0.793828	0.204832	0.307	0.218	0.999628
Rala	0.806067	0.204832	0.855	0.871	0.999628
Ube2e3	0.880303	0.204757	0.901	0.827	0.999628
Mff	0.415988	0.204708	0.736	0.644	0.935285
Cavin3	0.661617	0.204643	0.518	0.421	0.999628
Hoxa10	0.364944	0.204594	0.591	0.545	0.894574
Cs	0.189839	0.204497	0.558	0.431	0.676643
Drg1	0.264775	0.204483	0.607	0.485	0.796672
Tnfrsf1a	0.294538	0.204483	0.604	0.485	0.830962
Mtf2	0.237328	0.204369	0.492	0.401	0.752879
Wdr5	0.162308	0.2043	0.35	0.183	0.626769
Usp4	0.0995459	0.204223	0.482	0.332	0.477331
Slc3a2	0.465107	0.204201	0.693	0.609	0.9738
Snw1	0.800765	0.204175	0.818	0.743	0.999628
Tomm22	0.989742	0.204113	0.848	0.802	0.999628
Agfg1	0.125436	0.204078	0.518	0.332	0.536793
Capn2	0.319317	0.204014	0.69	0.554	0.854744
Zmynd8	0.323388	0.203994	0.601	0.475	0.858337
Wdr18	0.227985	0.203912	0.531	0.411	0.74326
Senp6	0.902576	0.20385	0.904	0.832	0.999628
Ralbp1	0.723059	0.203813	0.812	0.733	0.999628
Lamp2	0.219237	0.203784	0.693	0.564	0.727798
Luc7l	0.191342	0.203762	0.545	0.411	0.679031
Hectd1	0.530082	0.203717	0.749	0.698	0.999628
Hsph1	0.181278	0.203599	0.317	0.163	0.658456
Rbpms2	0.421132	0.203452	0.561	0.436	0.93842
Rsrc1	0.297544	0.203407	0.614	0.505	0.835006
Gapdh	0.0144189	0.203297	0.993	0.99	0.1392
Slc35b1	0.165423	0.203216	0.551	0.396	0.631617
Zc3h18	0.144848	0.203125	0.455	0.322	0.582538
Ubap2l	0.904475	0.20299	0.799	0.762	0.999628
Esf1	0.485142	0.202988	0.7	0.559	0.982772
Hdac3	0.1577	0.202984	0.541	0.416	0.615984
Borcs8	0.108725	0.202965	0.469	0.317	0.499114
Chchd1	0.981828	0.202877	0.779	0.743	0.999628
Dnttip2	0.470654	0.202875	0.719	0.614	0.97758
Hey2	0.101465	0.202833	0.304	0.178	0.481226
Uhrf1	0.507112	0.202826	0.353	0.213	0.996292
Uqcrh	0.0381976	0.202816	0.99	1	0.273973
Cdc5l	0.73747	0.20281	0.756	0.673	0.999628
Pam16	0.50481	0.202754	0.746	0.624	0.996292
Sptan1	0.415367	0.20275	0.65	0.535	0.935285
Cd2ap	0.357493	0.202712	0.574	0.505	0.887754
Hadha	0.695586	0.202438	0.851	0.723	0.999628
Gm42418	NA	0.202435	1	1	NA
Tpm4	0.186846	0.202412	0.977	0.96	0.670671
Srrm2	0.176185	0.202368	0.974	0.975	0.650548
Mrps18a	0.278346	0.202348	0.66	0.554	0.819823
Pla2g7	0.137382	0.202322	0.376	0.203	0.569374
Foxd1	0.531978	0.202278	0.162	0.099	0.999628
Rnf26	0.219376	0.202253	0.393	0.262	0.727798
H2afy2	0.379864	0.202249	0.66	0.55	0.904009
Chrac1	0.493313	0.202249	0.657	0.594	0.989038
Ubac1	0.144029	0.202221	0.495	0.342	0.580964
Lars	0.277027	0.20221	0.607	0.49	0.817832
Ndufaf7	0.142878	0.202197	0.353	0.163	0.578485
Gtf2i	0.478869	0.20216	0.746	0.644	0.980599
Isyna1	0.942774	0.20216	0.842	0.812	0.999628
Zwint	0.678058	0.2021	0.677	0.629	0.999628
H13	0.389125	0.202027	0.723	0.574	0.910728
Zcrb1	0.848052	0.202027	0.851	0.802	0.999628
Ddx50	0.793988	0.201983	0.875	0.767	0.999628
Raph1	0.62762	0.201969	0.644	0.52	0.999628
Gmnn	0.788072	0.201895	0.403	0.307	0.999628
Fcf1	0.125115	0.201843	0.548	0.366	0.536544
Tdg	0.162663	0.201821	0.558	0.411	0.627545
Gm17501	0.0953048	0.20174	0.373	0.218	0.461326
Akirin2	0.943246	0.201727	0.805	0.728	0.999628
Smyd2	0.195432	0.201589	0.459	0.287	0.685191
Gmps	0.38124	0.201364	0.653	0.525	0.905025
Gata3	0.374751	0.201277	0.71	0.658	0.901593
Myh11	0.167968	0.201208	0.224	0.153	0.635137
Mrps5	0.371415	0.201157	0.637	0.52	0.900145
Pafah1b2	0.257424	0.201142	0.71	0.589	0.786755
Copb1	0.477458	0.201108	0.696	0.599	0.980599
Eif3b	0.590923	0.20089	0.64	0.535	0.999628
Anp32a	0.248426	0.20075	0.964	0.965	0.771087
Mpnd	0.200936	0.200671	0.614	0.47	0.697133
Tmem147	0.291135	0.200671	0.716	0.54	0.827847
Wbp4	0.551291	0.20046	0.743	0.614	0.999628
Golga7	0.351203	0.20043	0.703	0.559	0.882197
Tpd52l2	0.298438	0.200426	0.673	0.559	0.835053
Pak1ip1	0.312831	0.200417	0.634	0.47	0.850052
Fam111a	0.466176	0.200389	0.353	0.228	0.9738
Rnf4	0.138602	0.20036	0.495	0.342	0.569791
Nudt21	0.961721	0.200351	0.809	0.723	0.999628
Ifngr2	0.291042	0.200195	0.62	0.559	0.827847
Prpf4b	0.832223	0.200171	0.904	0.837	0.999628
Tpt1	0.000354562	0.200149	1	1	0.0089857
Med29	0.422263	0.199987	0.686	0.564	0.939028
Ssu72	0.877537	0.19996	0.795	0.698	0.999628
Mybbp1a	0.212149	0.199752	0.452	0.307	0.720247
Tcof1	0.445892	0.199713	0.574	0.465	0.959275
Edf1	0.369859	0.199702	0.96	0.95	0.900145
Slc4a7	0.0828285	0.199649	0.409	0.277	0.423392
Tmem97	0.237469	0.199649	0.363	0.193	0.752879
Ethe1	0.121481	0.199601	0.399	0.218	0.528159
Tpm2	0.999073	0.199498	0.97	0.97	0.999628
Pimreg	0.745343	0.199466	0.274	0.208	0.999628
Anapc13	0.775785	0.19942	0.835	0.738	0.999628
Tgfb1i1	0.938863	0.199389	0.825	0.767	0.999628
Bloc1s2	0.141912	0.199362	0.465	0.282	0.576797
Dmac1	0.232842	0.199345	0.601	0.495	0.750096
Erg28	0.241146	0.199321	0.568	0.446	0.760984
Taf13	0.149847	0.199271	0.389	0.238	0.594427
Rsbn1l	0.355435	0.199129	0.743	0.609	0.886195
Dctn2	0.754058	0.199069	0.891	0.827	0.999628
Armcx3	0.441064	0.199033	0.644	0.569	0.958847
Casp6	0.159575	0.199028	0.436	0.282	0.619152
Abhd17a	0.531626	0.198978	0.746	0.634	0.999628
Hsd17b4	0.167354	0.198921	0.535	0.411	0.634231
Chmp3	0.403731	0.198851	0.736	0.55	0.926125
Isoc1	0.192618	0.198775	0.429	0.307	0.681185
Cetn3	0.874348	0.198753	0.855	0.802	0.999628
Gadd45b	0.212125	0.198703	0.38	0.322	0.720247
Mtfr1l	0.27199	0.198637	0.663	0.505	0.806469
Tor2a	0.198672	0.198496	0.472	0.327	0.693683
Rpf1	0.192008	0.198403	0.429	0.322	0.679619
Dlc1	0.8829	0.198322	0.911	0.812	0.999628
Pdgfrb	0.499634	0.19832	0.947	0.941	0.993341
Tomm70a	0.233709	0.198254	0.564	0.436	0.750405
Rsrc2	0.662089	0.198248	0.924	0.871	0.999628
Timm10	0.184724	0.198177	0.452	0.332	0.664809
Cltc	0.306991	0.198156	0.63	0.495	0.846062
Nip7	0.251617	0.198119	0.515	0.361	0.775993
Sdha	0.644316	0.198035	0.769	0.653	0.999628
Mrpl24	0.840693	0.198005	0.759	0.683	0.999628
Atp6ap1	0.100907	0.197953	0.472	0.282	0.480815
Washc3	0.118059	0.197953	0.432	0.282	0.519842
Chordc1	0.233742	0.197878	0.551	0.436	0.750405
Cmpk1	0.41283	0.19787	0.66	0.545	0.934372
Pet100	0.363159	0.197826	0.693	0.564	0.892347
Hnrnpll	0.232439	0.197699	0.561	0.455	0.749767
Rap1a	0.832104	0.197695	0.941	0.866	0.999628
Cinp	0.222971	0.197686	0.323	0.158	0.734939
Ergic3	0.849159	0.197606	0.848	0.748	0.999628
Plekho1	0.184145	0.197471	0.538	0.416	0.663898
Mpg	0.379809	0.197428	0.607	0.53	0.904009
Zfp638	0.413488	0.197385	0.663	0.55	0.935285
Nsmce4a	0.647804	0.197383	0.818	0.807	0.999628
4921524J17Rik	0.194857	0.197359	0.574	0.431	0.684863
Ift43	0.814561	0.197231	0.789	0.733	0.999628
Tmbim6	0.548949	0.197102	0.954	0.871	0.999628
Yrdc	0.169467	0.197085	0.383	0.208	0.637498
Cd63	0.155259	0.197058	0.99	0.995	0.610546
Bmp1	0.162992	0.197028	0.541	0.391	0.628219
Cyth2	0.495542	0.197009	0.673	0.629	0.989626
Polr2a	0.514151	0.197009	0.657	0.54	0.998358
Ankrd49	0.201339	0.196907	0.333	0.163	0.697133
Trim44	0.465925	0.196822	0.696	0.624	0.9738
Laptm4a	0.707812	0.196815	0.98	0.965	0.999628
Purb	0.706264	0.196813	0.98	0.95	0.999628
Sephs1	0.170072	0.196795	0.442	0.327	0.638592
Snx3	0.468442	0.196741	0.904	0.876	0.975682
Rbck1	0.131242	0.196456	0.508	0.322	0.553127
Exosc3	0.250653	0.196414	0.508	0.386	0.774733
Sh3bgrl	0.996694	0.196414	0.904	0.822	0.999628
Arglu1	0.266749	0.196297	0.957	0.926	0.799504
Nbn	0.246094	0.196294	0.3	0.124	0.768484
Mrps16	0.946343	0.196218	0.776	0.743	0.999628
Tmem237	0.155803	0.196211	0.485	0.327	0.611504
Dnajb1	0.204846	0.196211	0.432	0.322	0.705621
Wasf2	0.877897	0.196196	0.815	0.767	0.999628
Tbx2	0.688567	0.196182	0.858	0.832	0.999628
Pdlim1	0.312261	0.196069	0.376	0.317	0.850052
Cenpp	0.818288	0.195957	0.373	0.277	0.999628
Papss1	0.871392	0.195925	0.805	0.777	0.999628
Nusap1	0.557774	0.195875	0.304	0.267	0.999628
Rab10	0.544782	0.195762	0.733	0.649	0.999628
Polr1c	0.193133	0.195624	0.525	0.401	0.681742
Bckdk	0.168766	0.195536	0.449	0.307	0.636035
Myef2	0.316501	0.195501	0.531	0.386	0.851181
Trappc2l	0.372987	0.195394	0.71	0.55	0.901274
Laptm4b	0.142005	0.195309	0.455	0.347	0.576797
Kat6a	0.159419	0.195309	0.429	0.292	0.619152
Dnajc19	0.454814	0.195309	0.657	0.554	0.964136
Itm2c	0.979539	0.195256	0.878	0.856	0.999628
Fam96b	0.67368	0.195238	0.779	0.688	0.999628
Map1b	0.295177	0.195207	0.333	0.252	0.831064
Sec23a	0.135707	0.195187	0.426	0.257	0.565362
Pitrm1	0.19515	0.195187	0.396	0.252	0.684863
Anapc15	0.21471	0.195089	0.455	0.317	0.721723
Selenos	0.3939	0.194987	0.677	0.574	0.914385
Lamp1	0.591517	0.194959	0.97	0.911	0.999628
Zcchc9	0.606269	0.194917	0.683	0.574	0.999628
Tmsb4x	0.0202407	0.194731	1	1	0.176799
Higd1a	0.896946	0.194716	0.729	0.634	0.999628
Mrpl3	0.200586	0.194672	0.495	0.376	0.697133
Ube2r2	0.696205	0.194631	0.878	0.807	0.999628
H2afj	0.884189	0.194615	0.782	0.688	0.999628
Magohb	0.176609	0.19435	0.505	0.322	0.650548
Meis1	0.267217	0.194334	0.548	0.406	0.799504
Gars	0.381464	0.194334	0.518	0.406	0.905025
Exosc7	0.479331	0.194262	0.584	0.51	0.980599
Ppp1r10	0.251605	0.194216	0.551	0.396	0.775993
Pigp	0.228286	0.194156	0.611	0.495	0.74326
Akr7a5	0.253361	0.194156	0.634	0.436	0.777725
Adsl	0.173782	0.194081	0.393	0.223	0.646149
Unc50	0.175013	0.194026	0.541	0.391	0.648724
Rps15a	9.65e-08	0.194022	1	1	1.16e-05
Arhgef1	0.315539	0.193933	0.624	0.49	0.851181
Irak1bp1	0.139662	0.193927	0.396	0.233	0.57184
Oard1	0.219157	0.193891	0.455	0.332	0.727798
Arid4b	0.891483	0.193829	0.726	0.708	0.999628
Bach1	0.218335	0.1937	0.482	0.361	0.727479
Etf1	0.453571	0.19369	0.591	0.505	0.964136
Ptpn11	0.340868	0.193653	0.614	0.48	0.877255
Pdha1	0.457167	0.193618	0.69	0.564	0.965056
Zfhx3	0.948768	0.193475	0.832	0.738	0.999628
Plat	0.173103	0.193404	0.538	0.337	0.645808
Lactb	0.224681	0.193371	0.353	0.188	0.737591
Asb4	0.266727	0.19323	0.257	0.139	0.799504
Thrap3	0.751905	0.19313	0.789	0.752	0.999628
Commd8	0.362885	0.193111	0.574	0.455	0.892212
Hnrnph3	0.666646	0.193049	0.739	0.668	0.999628
Rer1	0.978916	0.19301	0.818	0.743	0.999628
Rpl24	1.81e-08	0.192986	1	1	2.46e-06
Hist1h4i	0.289133	0.192974	0.307	0.173	0.824881
Hjurp	0.844958	0.192959	0.502	0.371	0.999628
Rtn3	0.453423	0.192744	0.696	0.574	0.964136
Zfp322a	0.167046	0.19272	0.475	0.366	0.634231
Eef1akmt1	0.328438	0.192674	0.548	0.431	0.863948
Prpsap1	0.335358	0.192647	0.677	0.515	0.872814
Hat1	0.527219	0.192624	0.528	0.426	0.999628
Alx1	0.54352	0.192593	0.132	0.059	0.999628
Fam110b	0.166003	0.19255	0.409	0.272	0.633237
Notch3	0.815438	0.192481	0.637	0.594	0.999628
Nedd4	0.0519661	0.192372	0.997	1	0.325708
Mak16	0.226448	0.192372	0.422	0.302	0.741004
Cnih4	0.787277	0.192372	0.746	0.673	0.999628
Rps14	6.34e-08	0.192298	1	1	8.07e-06
Pycr2	0.243355	0.192206	0.442	0.376	0.762637
Knl1	0.929884	0.192068	0.317	0.208	0.999628
Riok1	0.239462	0.192057	0.561	0.396	0.756967
Mvk	0.206336	0.192007	0.413	0.297	0.708182
Serpinb6a	0.717001	0.191685	0.706	0.663	0.999628
Zfp644	0.68989	0.191498	0.779	0.703	0.999628
Aifm1	0.31202	0.191484	0.578	0.446	0.850052
2210016L21Rik	0.32222	0.191484	0.594	0.475	0.85781
Map1lc3b	0.3256	0.191459	0.977	0.96	0.86136
Copg1	0.331226	0.191383	0.591	0.48	0.868907
Arcn1	0.371356	0.191383	0.614	0.49	0.900145
4930453N24Rik	0.264722	0.191317	0.617	0.46	0.796672
Wdr70	0.265787	0.191281	0.535	0.416	0.798536
Bms1	0.405369	0.191281	0.512	0.351	0.928008
Sfrp1	0.557869	0.19125	0.165	0.074	0.999628
Nr2f6	0.873674	0.191235	0.785	0.718	0.999628
Znrd1	0.656309	0.191222	0.746	0.609	0.999628
Otub1	0.472543	0.191205	0.653	0.584	0.979217
Mesd	0.32044	0.191055	0.578	0.48	0.854815
Dlst	0.346497	0.191055	0.594	0.455	0.880207
Mrps14	0.912013	0.19098	0.855	0.762	0.999628
Ap2a1	0.250828	0.190453	0.518	0.411	0.774733
Glyr1	0.361696	0.190404	0.624	0.47	0.890903
Nop56	0.998658	0.190398	0.653	0.559	0.999628
Itgb5	0.362788	0.190365	0.703	0.579	0.892212
Rbm7	0.395583	0.190292	0.653	0.51	0.914385
Ifrd1	0.340443	0.190286	0.34	0.243	0.877139
Polr1d	0.249948	0.1902	0.954	0.931	0.774273
Crlf3	0.179566	0.190139	0.442	0.243	0.655951
Alcam	0.801899	0.190102	0.578	0.495	0.999628
Pdrg1	0.192953	0.190044	0.538	0.401	0.681742
Psmc3ip	0.325327	0.190044	0.327	0.173	0.861196
Smap1	0.599805	0.189936	0.855	0.822	0.999628
Vamp4	0.187031	0.189897	0.393	0.262	0.670744
Cfap20	0.514372	0.18985	0.657	0.55	0.998358
Med21	0.596001	0.18985	0.703	0.614	0.999628
Snrnp25	0.196153	0.189789	0.366	0.223	0.687125
Hars	0.323253	0.189745	0.594	0.436	0.858337
Zc3h14	0.621084	0.189737	0.729	0.644	0.999628
Jagn1	0.213917	0.189581	0.561	0.381	0.720247
Mrps9	0.243225	0.189581	0.482	0.391	0.762637
Mrps18c	0.439007	0.189522	0.617	0.48	0.955915
Med9	0.260212	0.189454	0.521	0.391	0.788768
Ppil1	0.270519	0.189351	0.482	0.342	0.804013
Eftud2	0.311783	0.189346	0.551	0.426	0.850052
Clip1	0.504065	0.189051	0.558	0.455	0.995908
Tmed7	0.233632	0.188794	0.518	0.406	0.750405
Ptpra	0.463153	0.188785	0.667	0.564	0.972621
Uba1	0.679146	0.188761	0.719	0.634	0.999628
Tnfaip1	0.598191	0.188742	0.677	0.584	0.999628
Vrk1	0.287595	0.188628	0.396	0.297	0.823706
Ccm2	0.212993	0.188557	0.498	0.366	0.720247
Hmg20b	0.831898	0.188526	0.779	0.693	0.999628
Mthfd2l	0.214241	0.188518	0.472	0.322	0.72074
Rpa1	0.239502	0.18831	0.353	0.208	0.756967
Ldlr	0.442739	0.18831	0.205	0.079	0.958847
Snd1	0.236367	0.188263	0.541	0.391	0.751993
Rab1a	0.644059	0.188237	0.716	0.614	0.999628
Atf4	0.680626	0.188237	0.693	0.619	0.999628
Prelid3b	0.421298	0.18823	0.64	0.49	0.93842
Nid2	0.281814	0.188052	0.271	0.119	0.82054
Fam96a	0.633994	0.187983	0.693	0.594	0.999628
Cdca7	0.430553	0.187862	0.393	0.257	0.945083
Grk6	0.190926	0.187784	0.465	0.287	0.678146
Tro	0.155563	0.187771	0.469	0.351	0.611153
Plekhg2	0.507263	0.187734	0.673	0.584	0.996292
Eif2b3	0.334751	0.18769	0.429	0.277	0.872814
Kif3a	0.485434	0.187669	0.67	0.559	0.982772
Dhx36	0.89301	0.187542	0.759	0.678	0.999628
Prpf19	0.785678	0.187533	0.627	0.52	0.999628
Capza2	0.713875	0.187519	0.894	0.812	0.999628
Smim19	0.256608	0.187511	0.502	0.391	0.784851
Rgs7bp	0.263354	0.187425	0.33	0.158	0.795333
Hmmr	0.599431	0.187408	0.317	0.213	0.999628
Pfdn5	0.0393564	0.187372	0.987	0.985	0.277807
Tra2a	0.78792	0.187359	0.908	0.837	0.999628
Txnrd1	0.279953	0.187284	0.574	0.401	0.819964
Lsg1	0.179332	0.187212	0.439	0.267	0.655937
Gabarapl2	0.906351	0.187194	0.723	0.708	0.999628
Gng12	0.579692	0.187167	0.591	0.51	0.999628
Rad21	0.938239	0.187119	0.62	0.52	0.999628
Nolc1	0.428519	0.187005	0.541	0.406	0.943158
Mocs2	0.28411	0.187	0.505	0.381	0.82054
Ngf	0.124981	0.186906	0.333	0.213	0.536544
Nup43	0.252206	0.186821	0.399	0.272	0.776376
Lman1	0.862019	0.186813	0.772	0.653	0.999628
Dpm2	0.228597	0.186801	0.502	0.342	0.74326
Wtap	0.26504	0.186784	0.587	0.431	0.796881
Sbds	0.234821	0.186727	0.505	0.342	0.751902
Eri3	0.258133	0.186727	0.485	0.381	0.787742
Ndufs6	0.589048	0.186716	0.898	0.876	0.999628
Timm8b	0.910685	0.186665	0.818	0.782	0.999628
Tbc1d1	0.247846	0.186586	0.594	0.401	0.770213
Twistnb	0.328826	0.186586	0.574	0.416	0.864281
Fbn1	0.388258	0.186586	0.551	0.381	0.910728
Smim10l1	0.389728	0.186586	0.667	0.535	0.910728
Rangrf	0.311811	0.186506	0.363	0.243	0.850052
Ash2l	0.52969	0.186472	0.601	0.52	0.999628
Ccser2	0.213289	0.186442	0.492	0.356	0.720247
Yeats4	0.636506	0.186438	0.706	0.594	0.999628
Tmem50a	0.720526	0.186422	0.888	0.817	0.999628
Csnk1e	0.999408	0.186318	0.818	0.767	0.999628
Topors	0.619189	0.186293	0.594	0.49	0.999628
Trpc4ap	0.175159	0.186282	0.475	0.332	0.648724
Fuca1	0.323404	0.186213	0.601	0.495	0.858337
Gm47283	0.835013	0.186138	0.716	0.619	0.999628
Dnlz	0.490714	0.186086	0.683	0.535	0.986536
Gpx7	0.279361	0.186081	0.469	0.366	0.819964
Ckap2	0.818264	0.186081	0.297	0.178	0.999628
Emc10	0.860362	0.185936	0.809	0.728	0.999628
Dapk3	0.242828	0.185843	0.548	0.436	0.762637
Dkk2	0.112282	0.18583	0.809	0.787	0.5077
Pea15a	0.20946	0.185776	0.518	0.347	0.715291
Surf4	0.285621	0.185735	0.551	0.426	0.821903
Dnm1l	0.287555	0.185735	0.564	0.446	0.823706
Mcfd2	0.173516	0.185696	0.409	0.267	0.646149
Bex2	0.59594	0.185668	0.175	0.064	0.999628
Mrps11	0.295434	0.185501	0.521	0.406	0.831215
Ube2a	0.51816	0.185483	0.644	0.564	0.999628
2900097C17Rik	0.269112	0.185451	0.551	0.446	0.801389
Paics	0.753225	0.185403	0.756	0.609	0.999628
Srpr	0.457182	0.185361	0.663	0.52	0.965056
Rsl24d1	0.391905	0.185267	0.571	0.5	0.913136
Ccdc102a	0.279963	0.185251	0.521	0.376	0.819964
Cebpg	0.303446	0.185251	0.498	0.356	0.84098
Igf2bp2	0.293005	0.185203	0.495	0.376	0.829927
Gm7324	0.654444	0.185028	0.168	0.015	0.999628
Ppp2r2a	0.961137	0.185001	0.799	0.728	0.999628
Igf2bp1	0.276265	0.184982	0.436	0.342	0.816174
Pkm	0.0424224	0.184967	0.977	0.985	0.288048
Higd2a	0.841076	0.184913	0.805	0.683	0.999628
Ipo5	0.407237	0.184811	0.432	0.332	0.929459
Zpr1	0.243033	0.184779	0.406	0.282	0.762637
Ier5	0.389166	0.18456	0.558	0.446	0.910728
Npc2	0.974328	0.184434	0.904	0.822	0.999628
Foxs1	0.114672	0.184396	0.482	0.342	0.513657
Tmem128	0.166904	0.184377	0.436	0.282	0.634231
U2surp	0.954785	0.184246	0.776	0.663	0.999628
Lockd	0.720872	0.184112	0.343	0.218	0.999628
Dgcr6	0.544554	0.184025	0.686	0.579	0.999628
Nfe2l2	0.367122	0.184004	0.584	0.431	0.895814
Mrps22	0.2834	0.183972	0.38	0.262	0.82054
Trappc1	0.768176	0.183904	0.726	0.589	0.999628
Fnbp1l	0.5899	0.183745	0.627	0.559	0.999628
Prmt7	0.247852	0.183565	0.403	0.238	0.770213
Fam120a	0.28268	0.18344	0.475	0.327	0.82054
Rpl5	5.48e-06	0.183226	1	1	0.000413537
Cnot6	0.575426	0.18318	0.657	0.535	0.999628
Pdcd11	0.228084	0.183057	0.495	0.342	0.74326
Fbxl7	0.348179	0.183057	0.472	0.337	0.881248
Tmem109	0.512117	0.182971	0.521	0.46	0.998261
Mta2	0.405526	0.182962	0.617	0.51	0.928008
Nelfe	0.465155	0.182953	0.587	0.49	0.9738
Trib2	0.515226	0.18283	0.561	0.47	0.998966
Usp15	0.229824	0.182703	0.472	0.312	0.744699
Fen1	0.482933	0.182703	0.36	0.233	0.982772
Sdf2	0.333709	0.182662	0.568	0.426	0.872266
Polr2b	0.228565	0.182322	0.393	0.257	0.74326
Arfgap2	0.246888	0.182322	0.498	0.356	0.768484
Srebf2	0.312979	0.182322	0.32	0.198	0.850052
Ppp5c	0.343011	0.182322	0.502	0.371	0.878805
Trappc3	0.454498	0.182322	0.637	0.515	0.964136
Rpl26	2.63e-07	0.182254	0.997	1	2.75e-05
Vstm4	0.627887	0.182074	0.686	0.594	0.999628
Dnajc15	0.395017	0.181999	0.554	0.475	0.914385
Pex11b	0.217007	0.181892	0.386	0.243	0.726232
Gm13889	0.410383	0.181857	0.851	0.847	0.932981
Osgep	0.519463	0.181733	0.64	0.515	0.999628
Babam1	0.540847	0.181718	0.614	0.485	0.999628
Hoxc10	0.551642	0.181695	0.779	0.733	0.999628
Serpinb1a	0.637938	0.181644	0.383	0.292	0.999628
Nelfcd	0.33928	0.181633	0.578	0.431	0.876306
Slc9a3r1	0.292013	0.181576	0.455	0.332	0.829032
Hoxc8	0.327858	0.181563	0.436	0.371	0.863948
Imp4	0.242156	0.181507	0.432	0.272	0.762637
Prkcsh	0.573455	0.181482	0.703	0.559	0.999628
Prmt5	0.327147	0.18146	0.35	0.228	0.863769
Nme2	0.230076	0.181425	0.36	0.198	0.744699
Caprin1	0.82652	0.181387	0.842	0.782	0.999628
Smarca1	0.418851	0.181346	0.541	0.446	0.936553
Utp11	0.88465	0.181187	0.752	0.733	0.999628
Thop1	0.269225	0.181179	0.449	0.322	0.801389
Zeb1	0.727747	0.181048	0.759	0.698	0.999628
Lamtor5	0.771565	0.180819	0.785	0.639	0.999628
Degs1	0.476443	0.180798	0.637	0.54	0.980599
N4bp2l2	0.499286	0.180777	0.647	0.515	0.993341
Hoxd11	0.576077	0.180755	0.521	0.485	0.999628
Tmem176b	0.274487	0.180729	0.63	0.495	0.8118
Wdr46	0.283914	0.18071	0.406	0.248	0.82054
Atad2	0.628213	0.180649	0.422	0.302	0.999628
Psenen	0.996153	0.180531	0.776	0.738	0.999628
Smim12	0.283855	0.180498	0.535	0.366	0.82054
Tpp2	0.295963	0.180498	0.479	0.391	0.831555
Tmem11	0.392971	0.180353	0.637	0.485	0.913792
Get4	0.228154	0.180299	0.436	0.252	0.74326
Mrps6	0.387611	0.180293	0.525	0.436	0.910728
Nubp1	0.424639	0.180262	0.541	0.342	0.941228
Rrp15	0.529595	0.18023	0.446	0.361	0.999628
Ergic2	0.840325	0.180213	0.719	0.584	0.999628
Caml	0.285506	0.180162	0.548	0.381	0.821903
4933404O12Rik	0.682267	0.180162	0.178	0.02	0.999628
Oxa1l	0.388285	0.180147	0.657	0.5	0.910728
Rpl23	5e-14	0.180134	1	1	1.45e-11
Sars	0.827016	0.180097	0.762	0.733	0.999628
Cul5	0.406538	0.180018	0.607	0.455	0.928382
Ubxn4	0.847555	0.180008	0.818	0.767	0.999628
Ptcd2	0.253406	0.179971	0.469	0.322	0.777725
Snhg18	0.571521	0.179964	0.769	0.678	0.999628
Eef2	0.00923548	0.179956	1	1	0.1041
Cdc16	0.612667	0.179897	0.607	0.53	0.999628
Adamts1	0.760308	0.179886	0.538	0.465	0.999628
Eif1ad	0.3789	0.179793	0.469	0.361	0.904009
Luzp1	0.836083	0.179701	0.825	0.782	0.999628
Dap	0.389501	0.179641	0.587	0.431	0.910728
Mbnl1	0.574943	0.179641	0.528	0.406	0.999628
Bcap31	0.812718	0.179628	0.799	0.762	0.999628
Wdr26	0.70657	0.179608	0.726	0.624	0.999628
Iws1	0.370573	0.179468	0.594	0.455	0.900145
Pfdn2	0.785368	0.179367	0.822	0.762	0.999628
Dld	0.588062	0.179314	0.644	0.52	0.999628
Isy1	0.339326	0.179302	0.347	0.223	0.876306
Amotl1	0.918336	0.179257	0.723	0.663	0.999628
Mapk1ip1l	0.313301	0.179101	0.508	0.406	0.850359
Zkscan3	0.459393	0.179096	0.604	0.485	0.968218
Med8	0.473977	0.179096	0.604	0.49	0.980599
Srpk1	0.573468	0.179091	0.64	0.55	0.999628
Sar1b	0.599405	0.179091	0.663	0.584	0.999628
Brcc3	0.259546	0.179048	0.419	0.287	0.78824
Skiv2l2	0.325271	0.178994	0.455	0.332	0.861196
Dnajc9	0.852208	0.178866	0.495	0.376	0.999628
Maea	0.365947	0.178843	0.587	0.45	0.895417
Txnl4a	0.895266	0.178769	0.703	0.653	0.999628
Gar1	0.576599	0.178741	0.518	0.411	0.999628
Clptm1l	0.234183	0.178611	0.528	0.381	0.751231
Mex3d	0.268634	0.178555	0.38	0.272	0.801389
Cisd1	0.849192	0.17853	0.617	0.51	0.999628
Hist1h2bc	0.661963	0.178483	0.399	0.337	0.999628
Ctsd	0.361312	0.178435	0.696	0.599	0.890903
Fmr1	0.414157	0.178431	0.594	0.49	0.935285
Glud1	0.779743	0.178386	0.67	0.554	0.999628
Yipf5	0.36481	0.178369	0.568	0.475	0.894574
R3hdm4	0.441339	0.178369	0.617	0.49	0.958847
Cmc2	0.767159	0.178267	0.502	0.386	0.999628
Med19	0.386771	0.178248	0.551	0.441	0.910728
Mrps35	0.365501	0.178185	0.535	0.446	0.895396
Yif1a	0.307193	0.17812	0.558	0.396	0.846062
6330403K07Rik	0.161529	0.178009	0.446	0.267	0.62554
Zbtb8os	0.252076	0.178009	0.475	0.297	0.776376
Papola	0.807249	0.177955	0.743	0.673	0.999628
Brd4	0.994593	0.17795	0.686	0.634	0.999628
Cse1l	0.320237	0.177931	0.406	0.307	0.854815
Gucy1a2	0.225119	0.177867	0.353	0.203	0.737841
Pdcl3	0.921197	0.177822	0.822	0.713	0.999628
Ftsj3	0.395258	0.177681	0.353	0.208	0.914385
Fmnl2	0.346335	0.177605	0.426	0.361	0.880207
Mrps18b	0.318453	0.177599	0.422	0.287	0.853537
Ptp4a2	0.826027	0.177587	0.769	0.698	0.999628
Lyrm2	0.312395	0.177527	0.541	0.381	0.850052
Pde10a	0.284255	0.177334	0.3	0.203	0.82054
Nt5c3b	0.3284	0.177225	0.525	0.371	0.863948
Fam133b	0.964102	0.177169	0.772	0.673	0.999628
Polr2h	0.450633	0.17714	0.525	0.426	0.962705
Tmod3	0.970457	0.177111	0.743	0.634	0.999628
Nub1	0.349945	0.1771	0.568	0.431	0.88168
Grcc10	0.278635	0.177052	0.521	0.361	0.819823
Bop1	0.343201	0.177038	0.35	0.198	0.878805
Leprot	0.358474	0.176985	0.581	0.436	0.888559
Cenpt	0.421135	0.17697	0.264	0.124	0.93842
2610507B11Rik	0.314438	0.176931	0.327	0.178	0.850453
Uqcrc2	0.289895	0.176847	0.937	0.921	0.826452
Ndufv3	0.927929	0.176846	0.805	0.688	0.999628
Plce1	0.434185	0.176837	0.528	0.48	0.951006
Gpbp1	0.543712	0.176781	0.653	0.515	0.999628
Chmp6	0.436471	0.176717	0.571	0.475	0.952537
Unc5b	0.414572	0.176644	0.508	0.361	0.935285
[truncated: 2,088 more rows]

## Sheet: Stroma_cluster4.MutVsCTRL.DEGs
Gene	p_val	avg_logFC	pct.1	pct.2	p_val_adj
Gm13305	3.35e-14	-0.520978	0.267	0.601	5e-12
Ppp1r14a	7.7e-19	-0.468154	0.845	0.929	2.1e-16
Plod2	1.28e-12	-0.419882	0.603	0.72	1.31e-10
Tcf21	3.39e-11	-0.3635	0.712	0.893	2.78e-09
Rpl29	1.79e-53	-0.360292	1	1	2.93e-50
Ecm1	2.33e-07	-0.327954	0.624	0.762	8.49e-06
Penk	0.000614567	-0.325669	0.176	0.262	0.00485592
Des	1.91e-06	-0.318788	0.2	0.423	4.67e-05
Igfbp5	NA	-0.316381	0.364	0.411	NA
G0s2	1.91e-07	-0.303508	0.915	0.946	7.11e-06
Fabp4	NA	-0.300435	0.276	0.262	NA
Aldoa	3.15e-13	-0.295137	0.912	0.952	3.44e-11
Adm	0.0001238	-0.285504	0.348	0.47	0.00133574
Higd1b	0.131429	-0.279728	0.036	0.161	0.164537
Ldha	9.69e-12	-0.275345	0.967	0.988	8.83e-10
Smad7	2.25e-08	-0.273124	0.436	0.69	1.15e-06
Filip1l	3.2e-05	-0.252834	0.539	0.744	0.000470322
Bnip3	0.00026518	-0.252009	0.173	0.333	0.00251384
Ank3	3.2e-05	-0.250103	0.209	0.387	0.000470322
Pgk1	1.79e-09	-0.248922	0.824	0.827	1.17e-07
Plcb1	0.000606455	-0.237753	0.173	0.321	0.00485592
Mif	3.03e-10	-0.235832	0.927	0.94	2.26e-08
Gm10036	7.67e-07	-0.235361	0.267	0.452	2.29e-05
Id2	2.67e-05	-0.229415	0.7	0.804	0.000421152
Slc16a3	0.00193811	-0.224978	0.148	0.321	0.0103534
Ubc	1.25e-11	-0.220607	0.979	0.994	1.08e-09
Klf9	9.93e-05	-0.21825	0.267	0.387	0.00115737
Btg2	0.00330942	-0.214871	0.536	0.685	0.0154628
Timp3	0.000115522	-0.214094	0.706	0.821	0.00127152
Pfkl	6.09e-06	-0.213878	0.621	0.708	0.000120235
Sdc2	1.9e-05	-0.211187	0.539	0.631	0.000314496
Fos	0.00977854	-0.209157	0.685	0.744	0.0334976
Abcc9	0.0019664	-0.204322	0.288	0.446	0.0104704
Id1	0.000243594	-0.202264	0.352	0.5	0.00234996
Rgs5	0.0139063	-0.199984	0.715	0.792	0.0419813
AC160336.1	0.000153718	-0.196826	0.421	0.571	0.00157693
Gucy1a1	4.52e-07	-0.196503	0.967	0.988	1.4e-05
Dkk1	0.0582573	-0.193975	0.13	0.226	0.104332
AY036118	0.00686494	-0.192109	0.961	0.982	0.026855
Meis2	2.65e-07	-0.189957	0.939	0.964	9.24e-06
Cpm	0.00763879	-0.185826	0.206	0.327	0.0286706
Eif4a2	1.7e-06	-0.184471	0.794	0.845	4.22e-05
Pdlim3	0.0483331	-0.182652	0.136	0.25	0.092869
Mecom	0.00297829	-0.181793	0.345	0.458	0.0141988
Tpi1	2.93e-06	-0.181695	0.936	0.952	6.77e-05
Dhrs3	0.000609284	-0.174471	0.639	0.768	0.00485592
Itih5	0.0144495	-0.172546	0.203	0.327	0.0428519
Fosb	0.0789669	-0.171973	0.403	0.381	0.125612
Camk2n1	0.000945597	-0.169478	0.588	0.673	0.00639713
Kcnj8	0.0154932	-0.169245	0.585	0.756	0.0453673
Pkm	3.22e-05	-0.163678	0.909	0.952	0.000470322
Gsta4	0.000786414	-0.158659	0.403	0.518	0.00568158
Ckb	0.0103224	-0.158024	0.47	0.53	0.03469
Insig2	0.00179895	-0.15334	0.255	0.387	0.0100214
Lurap1l	0.00549846	-0.150604	0.255	0.375	0.022714
Ankrd37	0.165609	-0.149664	0.088	0.25	0.192351
Cox4i2	0.0227466	-0.149036	0.194	0.286	0.0585628
Gpx3	0.0189643	-0.146681	0.267	0.256	0.0520091
2810004N23Rik	0.000547206	-0.146638	0.409	0.512	0.00446476
Slc2a3	0.339025	-0.14337	0.061	0.19	0.347718
Id4	0.324905	-0.142532	0.067	0.179	0.335067
Cir1	0.000776982	-0.139544	0.561	0.631	0.00566842
Ift46	0.00265061	-0.138966	0.315	0.411	0.0129419
Pla2g4a	0.00616662	-0.138824	0.291	0.411	0.0250949
Lpar1	0.0064379	-0.135351	0.385	0.464	0.0259513
Fabp5	0.0766917	-0.134098	0.748	0.679	0.12355
Kcne4	0.148207	-0.133531	0.133	0.226	0.179076
Pbx1	0.000110555	-0.131771	0.906	0.952	0.0012334
Hk2	0.151826	-0.129434	0.173	0.22	0.181483
Col15a1	0.471902	-0.125269	0.07	0.119	0.475381
Rps18	4.7e-17	-0.125251	0.997	1	1.1e-14
Tgfbi	0.0173438	-0.124972	0.455	0.482	0.0487052
Txnl4a	0.0015502	-0.123812	0.588	0.613	0.00921135
F2r	0.00708248	-0.123632	0.6	0.673	0.0273945
Alx1	0.309293	-0.123632	0.088	0.196	0.321038
Ccdc8	0.00779171	-0.123176	0.291	0.417	0.0290418
Fam19a1	0.228329	-0.122522	0.118	0.214	0.24587
Rarres2	0.0159217	-0.122174	0.77	0.827	0.0458196
Znhit1	0.00308148	-0.118841	0.518	0.589	0.0145638
Plat	0.0301072	-0.118473	0.342	0.423	0.0698386
Adat2	0.320565	-0.118264	0.094	0.202	0.330853
Cldn11	0.0745705	-0.118114	0.209	0.351	0.121325
Pid1	0.0306792	-0.117338	0.652	0.637	0.0704296
Grina	0.0928632	-0.116801	0.158	0.292	0.137451
Fxyd2	0.0965094	-0.116778	0.161	0.292	0.140067
B230354K17Rik	0.0232767	-0.116675	0.252	0.351	0.0597206
Epb41l4aos	0.00481449	-0.116499	0.391	0.488	0.0204612
Plekhh2	0.0142001	-0.115513	0.276	0.393	0.042342
Ccdc141	0.0882499	-0.11491	0.182	0.28	0.133118
Pawr	0.00730284	-0.113174	0.418	0.512	0.0278527
Trappc6a	0.00676302	-0.112602	0.382	0.494	0.026855
Fndc3a	0.00452566	-0.112095	0.7	0.708	0.0195833
Lmcd1	0.0739883	-0.111986	0.306	0.339	0.120612
P4ha1	0.00710278	-0.111793	0.515	0.613	0.0274084
Cd47	0.0113358	-0.111286	0.588	0.613	0.0367562
Ahr	0.454656	-0.111279	0.07	0.167	0.458571
Plk2	0.340658	-0.111117	0.112	0.19	0.349175
Vegfa	0.215361	-0.108363	0.145	0.208	0.234679
Higd1a	0.0139023	-0.107802	0.767	0.821	0.0419813
Tigd2	0.0212248	-0.107519	0.312	0.411	0.0559624
Angptl4	0.0865957	-0.107002	0.2	0.298	0.131767
S1pr3	0.0165962	-0.106656	0.327	0.411	0.0471663
Gas1	0.0559142	-0.106603	0.6	0.714	0.101662
Cebpb	0.0105953	-0.106502	0.515	0.595	0.0353176
Agpat4	0.0123286	-0.106354	0.43	0.464	0.0389575
Nfkbia	0.00618551	-0.10528	0.545	0.661	0.0251095
Cdc40	0.0124223	-0.105245	0.324	0.435	0.0391465
Jun	0.0830215	-0.104861	0.736	0.774	0.129293
Plac8	0.0264641	-0.104507	0.745	0.792	0.0643051
Slc38a9	0.260702	-0.104176	0.124	0.226	0.275129
Eif3j2	0.123137	-0.103415	0.17	0.286	0.157127
Gpi1	0.00345026	-0.103153	0.642	0.78	0.0159392
Gsto1	0.0395871	-0.103142	0.233	0.345	0.0824941
Rps27rt	0.122837	-0.10203	0.176	0.274	0.157086
Ddit4	0.352912	-0.101261	0.106	0.19	0.360383
Eif4ebp1	0.252193	0.100041	0.77	0.72	0.26822
Srpk1	0.134817	0.100154	0.476	0.393	0.167247
Rnase4	0.135486	0.100257	0.415	0.321	0.167569
Gucy1a2	0.168248	0.100257	0.297	0.202	0.194041
2410002F23Rik	0.180594	0.100321	0.291	0.185	0.205391
Psmd1	0.196597	0.100334	0.636	0.643	0.219035
Hnrnpr	0.202842	0.100373	0.888	0.839	0.223262
Cdc73	0.189883	0.10039	0.276	0.167	0.213586
Serhl	0.276729	0.10039	0.248	0.155	0.290637
Grcc10	0.132703	0.10043	0.379	0.286	0.165626
Glud1	0.196912	0.100462	0.612	0.542	0.219088
Galnt10	0.312826	0.100462	0.218	0.131	0.32409
Dapk3	0.131698	0.10052	0.452	0.375	0.164622
Mical3	0.441071	0.10054	0.191	0.095	0.445966
Rnf4	0.148125	0.100563	0.333	0.226	0.179076
Luc7l	0.11318	0.100644	0.436	0.363	0.15194
Nfix	0.410816	0.100654	0.858	0.893	0.416918
Eif4h	0.253935	0.100805	0.867	0.821	0.269899
Bzw1	0.277084	0.100855	0.885	0.893	0.290735
Atn1	0.123985	0.100855	0.364	0.268	0.157842
Prpf19	0.18721	0.100855	0.664	0.536	0.210724
Magi3	0.311031	0.100876	0.236	0.119	0.322434
Smim10l1	0.187004	0.100906	0.664	0.536	0.210637
Psmc6	0.21081	0.100996	0.83	0.738	0.230793
Tcf3	0.160441	0.101047	0.555	0.482	0.187678
Atp5g1	0.292953	0.1011	0.942	0.929	0.30582
Lmbrd1	0.182475	0.101103	0.288	0.185	0.206956
Mapk8	0.213285	0.101103	0.264	0.202	0.232881
Phf3	0.175118	0.101169	0.721	0.655	0.200134
Larp4b	0.176052	0.101217	0.33	0.232	0.200922
Usp1	0.220709	0.101217	0.291	0.244	0.239393
Smc2	0.350996	0.101217	0.248	0.208	0.358833
Dnlz	0.1505	0.101261	0.567	0.5	0.180402
Fam103a1	0.153253	0.101261	0.57	0.476	0.182391
Zdhhc14	0.137833	0.101315	0.4	0.268	0.169815
Kif2a	0.141358	0.101329	0.548	0.482	0.173264
Med4	0.115531	0.1014	0.482	0.405	0.15288
Tmub2	0.154018	0.1014	0.315	0.19	0.182507
Tufm	0.203837	0.1014	0.279	0.202	0.224057
Gxylt1	0.205114	0.1014	0.285	0.19	0.22531
Fbxl7	0.315203	0.101444	0.748	0.714	0.325935
Brcc3	0.183753	0.1015	0.291	0.167	0.208118
Ube3c	0.230924	0.1015	0.255	0.167	0.248098
Zfp622	0.148822	0.101584	0.333	0.256	0.17933
Tpd52l2	0.161315	0.101584	0.652	0.571	0.188304
Dnajb11	0.171569	0.101649	0.645	0.554	0.197178
Cltc	0.1675	0.101669	0.558	0.5	0.193587
Dpm1	0.118577	0.101718	0.467	0.369	0.155449
Fkbp1a	0.276814	0.101718	0.967	0.952	0.290637
Sdhaf2	0.149769	0.101788	0.309	0.202	0.179921
0610037L13Rik	0.172179	0.10182	0.548	0.494	0.197741
Rbx1	0.336266	0.10182	0.936	0.923	0.34532
Trmt6	0.474164	0.101837	0.179	0.071	0.477366
Otud4	0.196113	0.1019	0.267	0.185	0.218845
Srp54a	0.21653	0.1019	0.267	0.173	0.235797
Sipa1l2	0.256778	0.1019	0.239	0.173	0.272215
Rac1	0.257528	0.101941	0.873	0.905	0.272657
Rac3	0.133361	0.101945	0.47	0.423	0.166195
Mrps24	0.231003	0.101945	0.861	0.821	0.248098
Angptl2	0.118798	0.101953	0.333	0.22	0.155453
Plxnb2	0.160397	0.102018	0.558	0.488	0.187678
Tmem9b	0.130129	0.102063	0.333	0.238	0.163408
Clcn4	0.124526	0.102188	0.555	0.458	0.15819
Dnajc1	0.157626	0.10223	0.588	0.601	0.185377
Zcchc8	0.213577	0.102304	0.264	0.155	0.233045
Rpl14	0.126271	0.102321	0.997	1	0.15991
Lxn	0.114326	0.102344	0.403	0.327	0.152683
Mtfr1l	0.119385	0.102373	0.524	0.452	0.155453
Thap12	0.124123	0.102373	0.506	0.393	0.157842
Psmd13	0.166913	0.102422	0.7	0.649	0.193401
Jag1	0.436228	0.102436	0.161	0.131	0.441614
Nap1l4	0.184871	0.102576	0.67	0.571	0.208951
Ctsh	0.408985	0.102576	0.191	0.083	0.415316
Ergic2	0.166985	0.102661	0.639	0.595	0.193401
Supt16	0.211554	0.102661	0.594	0.518	0.231454
P3h1	0.143825	0.102671	0.548	0.452	0.17498
Gkap1	0.130887	0.102684	0.415	0.304	0.163984
Flrt2	0.17965	0.102692	0.327	0.268	0.204644
Jtb	0.107632	0.102784	0.494	0.423	0.149211
U2af2	0.111319	0.102784	0.467	0.399	0.150973
Ctsd	0.214847	0.102784	0.736	0.69	0.234275
Grn	0.171162	0.10287	0.745	0.661	0.196849
Trir	0.226366	0.102931	0.788	0.738	0.243916
Wdr45b	0.153884	0.102937	0.591	0.548	0.18248
Chpf2	0.404396	0.103012	0.194	0.089	0.41091
Rell1	0.333194	0.103125	0.215	0.155	0.34238
Ehmt2	0.113178	0.103176	0.382	0.298	0.15194
Cdv3	0.217064	0.103176	0.739	0.714	0.236221
Cdc20	0.693999	0.103176	0.109	0.065	0.694422
Rps29	0.00987475	0.1032	1	1	0.0335406
Tmem208	0.149526	0.103316	0.594	0.482	0.179782
2310009B15Rik	0.124149	0.103342	0.409	0.357	0.157842
Snrnp40	0.12903	0.103362	0.524	0.476	0.162401
Msrb2	0.226131	0.103378	0.261	0.179	0.243823
Orc6	0.112894	0.103398	0.397	0.286	0.15194
Wdr43	0.110221	0.103414	0.47	0.405	0.150761
Fis1	0.254843	0.103512	0.879	0.905	0.270513
Pole3	0.122135	0.10361	0.403	0.304	0.156966
Bnip2	0.152414	0.103649	0.591	0.548	0.182053
Ndufb7	0.270003	0.103682	0.83	0.732	0.283849
Rnf41	0.338762	0.103713	0.215	0.119	0.347666
Azi2	0.112893	0.103755	0.391	0.315	0.15194
Ptrhd1	0.200657	0.103785	0.276	0.167	0.221751
Mettl26	0.20243	0.103785	0.255	0.173	0.22324
H3f3a	0.110551	0.103807	1	1	0.150835
Smim8	0.123125	0.103908	0.364	0.256	0.157127
Zkscan3	0.120003	0.103961	0.536	0.452	0.155823
Marveld1	0.126908	0.103961	0.379	0.327	0.160308
Morf4l1	0.186807	0.10402	0.985	0.994	0.210559
Adam10	0.126369	0.104116	0.373	0.304	0.159911
Ptprf	0.1395	0.104116	0.361	0.304	0.171242
Copb1	0.192136	0.104121	0.685	0.685	0.215235
Foxp2	0.182607	0.104158	0.345	0.286	0.206963
Txlna	0.113859	0.104196	0.43	0.393	0.152308
AU019823	0.11962	0.10424	0.336	0.226	0.155572
Tenm3	0.196349	0.104253	0.594	0.518	0.218907
Sumo3	0.20857	0.104309	0.77	0.732	0.228799
Hmgn5	0.134218	0.104347	0.409	0.31	0.166631
Nkain4	0.167412	0.104347	0.585	0.506	0.193587
Anapc15	0.288168	0.104385	0.236	0.137	0.301208
Sucla2	0.113342	0.104403	0.506	0.47	0.15194
Kif1b	0.126525	0.104403	0.506	0.423	0.159986
Purg	0.152964	0.10442	0.3	0.179	0.182391
Mrpl46	0.134062	0.104451	0.33	0.256	0.166631
Csad	0.150663	0.104451	0.315	0.232	0.180402
Pir	0.15175	0.104451	0.306	0.214	0.181483
Derl2	0.102592	0.104479	0.397	0.292	0.145169
Emc10	0.18407	0.104484	0.77	0.702	0.208333
Emc4	0.103863	0.104528	0.467	0.399	0.146023
Uggt1	0.209841	0.104611	0.261	0.173	0.229886
Fbn2	0.325118	0.104611	0.67	0.625	0.335067
Map4	0.156944	0.104619	0.609	0.494	0.184965
Gclm	0.119433	0.104671	0.394	0.304	0.155453
mt-Nd2	0.124156	0.104678	1	1	0.157842
Prdx3	0.115377	0.104687	0.433	0.327	0.15288
Ostf1	0.161321	0.104739	0.539	0.518	0.188304
Ginm1	0.111052	0.104862	0.452	0.369	0.150973
Wtap	0.114876	0.10503	0.482	0.423	0.15288
Ctbp1	0.194594	0.105143	0.706	0.619	0.217499
Ss18	0.109193	0.105191	0.473	0.411	0.150232
Gorasp2	0.115239	0.105199	0.442	0.375	0.15288
Zfp445	0.143284	0.105206	0.376	0.339	0.174581
Adgre5	0.100409	0.105215	0.379	0.262	0.142572
Dkk3	0.107122	0.105215	0.358	0.274	0.148921
Ttyh3	0.1086	0.105215	0.376	0.292	0.149913
Abhd8	0.115686	0.105215	0.373	0.286	0.15288
Klhdc10	0.153763	0.105225	0.321	0.214	0.18248
Fam96a	0.129158	0.105334	0.512	0.464	0.162438
Nufip2	0.101978	0.105347	0.518	0.393	0.14443
Triobp	0.108374	0.105361	0.433	0.405	0.14986
Pcdh18	0.122582	0.105404	0.627	0.565	0.157058
6330403K07Rik	0.220574	0.105445	0.512	0.464	0.239393
Ube2h	0.108262	0.105478	0.536	0.494	0.149831
Snx2	0.117228	0.105478	0.542	0.47	0.15405
Sord	0.417281	0.105478	0.185	0.089	0.422955
Endod1	0.448171	0.105478	0.164	0.095	0.452587
Ndufa1	0.173828	0.105506	0.688	0.601	0.199495
Col13a1	0.639357	0.105506	0.118	0.036	0.640138
Flii	0.1004	0.105562	0.415	0.31	0.142572
Mob2	0.0984141	0.105588	0.391	0.28	0.141454
Park7	0.230319	0.105597	0.93	0.905	0.24785
Ndufa4l2	0.604612	0.10569	0.845	0.875	0.606461
4930453N24Rik	0.103345	0.105724	0.427	0.345	0.145983
Dhrs1	0.103892	0.105724	0.418	0.357	0.146023
Gnao1	0.505247	0.105724	0.158	0.071	0.508035
Chst2	0.197097	0.105835	0.27	0.196	0.219141
Trp53i13	0.101981	0.10588	0.458	0.333	0.14443
Cpsf6	0.118846	0.105913	0.542	0.518	0.155453
Tln1	0.351175	0.10592	0.936	0.946	0.358833
Mpi	0.626775	0.105987	0.133	0.036	0.627924
Rps6ka4	0.105275	0.106012	0.352	0.238	0.147439
Ssbp4	0.165793	0.10606	0.736	0.589	0.192428
Foxc1	0.245657	0.106066	0.236	0.173	0.262119
Cd40	0.263687	0.106066	0.224	0.161	0.277922
Acp1	0.181858	0.106095	0.776	0.685	0.206543
1110008P14Rik	0.111665	0.106126	0.355	0.304	0.150973
Twist2	0.186723	0.106181	0.309	0.196	0.210559
Poldip2	0.122711	0.106259	0.527	0.446	0.157086
Ralgps2	0.200335	0.106287	0.53	0.5	0.221544
Arap1	0.200054	0.106295	0.776	0.774	0.221382
Mrpl52	0.254354	0.106298	0.885	0.893	0.270169
Lamtor5	0.14187	0.106311	0.673	0.607	0.173467
Nup85	0.437815	0.106388	0.185	0.083	0.442946
Acot7	0.186749	0.106411	0.291	0.202	0.210559
Atf4	0.184219	0.106418	0.648	0.631	0.208358
Ccnd3	0.315578	0.106437	0.842	0.804	0.326117
Tnfaip8	0.191404	0.106505	0.427	0.327	0.215001
Mrpl12	0.141947	0.106517	0.591	0.548	0.173467
Trpc4ap	0.0953629	0.106572	0.445	0.351	0.139347
Rhoq	0.120751	0.106572	0.418	0.333	0.156412
Ccdc32	0.121378	0.106572	0.336	0.244	0.156579
Mpv17	0.148283	0.106572	0.309	0.226	0.179076
Vkorc1	0.157683	0.106622	0.652	0.625	0.185377
Asf1a	0.120207	0.106637	0.488	0.399	0.155841
Apc	0.104891	0.106645	0.4	0.31	0.147027
Ltbr	0.0996319	0.106725	0.367	0.28	0.142207
Sdf2l1	0.349843	0.106747	0.212	0.131	0.358142
Plekhg3	0.402646	0.106747	0.185	0.137	0.409386
Mid1ip1	0.115591	0.106764	0.442	0.381	0.15288
Gars	0.0851992	0.10684	0.491	0.369	0.130952
Snapc5	0.110745	0.10684	0.458	0.357	0.150973
Eif4g1	0.212465	0.106872	0.618	0.607	0.232141
Phc3	0.218498	0.106913	0.248	0.173	0.237309
Tubb2b	0.266873	0.106922	0.324	0.22	0.280739
Snd1	0.0978527	0.107012	0.4	0.292	0.141266
Vps41	0.104835	0.107146	0.391	0.327	0.147027
Edf1	0.348491	0.107171	0.909	0.917	0.35698
Tmem120a	0.212117	0.107186	0.255	0.143	0.231914
Ufsp2	0.130531	0.107204	0.476	0.429	0.163694
Bax	0.167996	0.10722	0.794	0.696	0.194005
Ahdc1	0.15986	0.107342	0.273	0.173	0.187264
Scn7a	0.329045	0.107342	0.218	0.137	0.338541
Fbl	0.161805	0.107471	0.688	0.661	0.188734
Zfp131	0.0988478	0.1075	0.364	0.268	0.141637
Igf1r	0.20255	0.107555	0.736	0.667	0.22324
Magoh	0.145899	0.107631	0.652	0.661	0.177241
Emc7	0.116716	0.107631	0.648	0.524	0.153623
Ilkap	0.124753	0.107723	0.633	0.518	0.158355
Aggf1	0.099239	0.107875	0.406	0.292	0.141839
Ptprs	0.135416	0.107967	0.7	0.613	0.167569
Cdc16	0.139426	0.107983	0.636	0.577	0.171242
Zfp451	0.0977492	0.108015	0.37	0.28	0.141241
Amfr	0.141236	0.108045	0.3	0.202	0.173243
Rab4a	0.248343	0.108079	0.23	0.137	0.264564
Trnt1	0.0952897	0.108132	0.406	0.298	0.139347
Sar1b	0.0990815	0.10817	0.518	0.411	0.141792
Olfml3	0.37651	0.10817	0.812	0.81	0.383288
Osbp	0.221423	0.108214	0.255	0.149	0.239851
3110062M04Rik	0.239325	0.108214	0.242	0.149	0.256197
Ankrd10	0.0910712	0.108244	0.406	0.286	0.135532
Smarcd1	0.111488	0.108244	0.391	0.274	0.150973
Gnl3	0.122414	0.108403	0.458	0.345	0.156966
Bhlhb9	0.116435	0.108403	0.348	0.274	0.153593
Lrpap1	0.222268	0.108403	0.77	0.744	0.240607
Prkar2a	0.302186	0.108533	0.218	0.119	0.314458
Tspyl2	0.31361	0.108533	0.218	0.089	0.324697
Nt5c3b	0.0883127	0.108552	0.476	0.387	0.133118
Twf2	0.121728	0.108578	0.321	0.208	0.156699
Zfp422	0.0900702	0.108647	0.467	0.411	0.134542
Retreg2	0.114857	0.108688	0.339	0.244	0.15288
Tmem263	0.112741	0.108737	0.479	0.393	0.15194
Ilk	0.221137	0.108765	0.882	0.869	0.239699
Pigc	0.180077	0.108773	0.27	0.167	0.204945
Unc5c	0.202794	0.108811	0.352	0.31	0.223262
Vstm4	0.240143	0.108825	0.876	0.815	0.256904
Dpysl3	0.197761	0.108857	0.609	0.53	0.219141
Plgrkt	0.106499	0.108909	0.509	0.435	0.148587
Galk2	0.297268	0.10899	0.209	0.119	0.309536
Man2b1	0.316596	0.10899	0.209	0.119	0.326963
Colec12	0.167296	0.109091	0.761	0.762	0.193587
Clasrp	0.207557	0.109102	0.248	0.143	0.22784
Pofut2	0.164865	0.109188	0.661	0.583	0.192031
Zeb1	0.142409	0.109331	0.627	0.56	0.173773
Etf1	0.106968	0.109368	0.37	0.321	0.14892
Cep295	0.350351	0.109453	0.206	0.113	0.358438
Cpxm1	0.224369	0.10948	0.67	0.625	0.242402
Fnta	0.122364	0.109546	0.618	0.571	0.156966
Ccdc34	0.240391	0.109636	0.691	0.655	0.257002
Ccne1	0.614078	0.109727	0.13	0.048	0.61558
Chd1	0.094803	0.109757	0.458	0.393	0.138943
Tfam	0.0905106	0.109826	0.418	0.304	0.134943
Akirin1	0.154997	0.109826	0.288	0.214	0.183138
Smarce1	0.165417	0.109826	0.776	0.768	0.192351
Bag5	0.0843609	0.109892	0.53	0.411	0.130152
Kif5b	0.38188	0.109896	0.794	0.81	0.388513
Canx	0.17441	0.109904	0.797	0.726	0.199821
R3hdm1	0.0983065	0.109945	0.576	0.494	0.141435
Rtn3	0.111618	0.110001	0.618	0.53	0.150973
D5Ertd579e	0.218445	0.110009	0.248	0.125	0.237309
Dicer1	0.115232	0.110134	0.367	0.28	0.15288
Smim20	0.144174	0.110173	0.297	0.161	0.175275
Hdac7	0.159834	0.110173	0.279	0.173	0.187264
Rrm1	0.287774	0.11025	0.248	0.179	0.300988
Mettl1	0.106548	0.110268	0.385	0.31	0.148587
Rangap1	0.495517	0.110311	0.161	0.065	0.498557
Eci2	0.149861	0.110317	0.764	0.72	0.179921
Rgs3	0.106397	0.110392	0.339	0.22	0.148587
Gpatch8	0.109479	0.110392	0.636	0.571	0.15029
Mrpl41	0.0878116	0.11045	0.482	0.393	0.132851
Cul7	0.0982506	0.110458	0.342	0.244	0.141435
Jagn1	0.0782139	0.110582	0.412	0.315	0.124959
G3bp1	0.161207	0.110596	0.791	0.768	0.188304
Nub1	0.0798518	0.110696	0.439	0.351	0.126584
Ednra	0.197389	0.110709	0.448	0.381	0.219141
Psmd3	0.11113	0.11072	0.648	0.595	0.150973
Anapc16	0.106757	0.1108	0.561	0.5	0.148753
Lsm12	0.120127	0.110876	0.636	0.554	0.155841
Atp6v0d1	0.106394	0.110885	0.615	0.542	0.148587
Grb14	0.329484	0.110933	0.2	0.113	0.33878
Ap1g1	0.263192	0.110995	0.23	0.137	0.277579
Rtl8a	0.0770866	0.111063	0.455	0.327	0.123837
Kpna4	0.0928102	0.111153	0.452	0.375	0.137451
Sugt1	0.147288	0.111168	0.739	0.696	0.178419
Rpp21	0.0821915	0.111276	0.527	0.429	0.12869
Tprgl	0.147305	0.111276	0.8	0.708	0.178419
Polr2f	0.153182	0.111326	0.8	0.732	0.182391
Sipa1	0.325465	0.111403	0.203	0.119	0.335067
Gpr153	0.230904	0.111453	0.236	0.143	0.248098
Mrfap1	0.19616	0.111469	0.967	0.976	0.218845
Vapb	0.110191	0.111484	0.588	0.506	0.150761
Cdk4	0.257392	0.111493	0.909	0.899	0.272657
Gtf2ird1	0.165245	0.1115	0.267	0.173	0.192336
Ehd2	0.113307	0.111509	0.415	0.375	0.15194
Pard3b	0.12227	0.111509	0.424	0.327	0.156966
Mill2	0.120871	0.111587	0.315	0.196	0.156412
Drap1	0.174702	0.111621	0.933	0.893	0.199926
Polr2d	0.074059	0.111739	0.412	0.327	0.120612
Gm1673	0.115221	0.111787	0.548	0.506	0.15288
Itsn2	0.146801	0.111984	0.273	0.196	0.178072
Psme4	0.119178	0.112047	0.315	0.244	0.155453
Pdcd4	0.197312	0.11206	0.836	0.81	0.219141
Twsg1	0.0829053	0.112105	0.388	0.238	0.129244
Lpcat3	0.0848134	0.112132	0.391	0.292	0.130643
Cycs	0.156994	0.112151	0.573	0.512	0.184965
Slc3a2	0.231339	0.112239	0.612	0.542	0.248296
Mcam	0.174478	0.112428	0.261	0.161	0.199821
Ralbp1	0.178831	0.11246	0.8	0.702	0.203952
Ppm1m	0.122411	0.112471	0.312	0.22	0.156966
Lrrfip1	0.117887	0.112634	0.458	0.393	0.154791
Atxn10	0.203402	0.112641	0.855	0.881	0.223729
Rnf7	0.153564	0.112752	0.861	0.768	0.18248
Nrf1	0.146267	0.112876	0.273	0.185	0.177556
Lactb	0.0960271	0.112908	0.324	0.25	0.139862
Rflnb	0.122891	0.112917	0.327	0.256	0.157086
Arid1b	0.0761802	0.113329	0.415	0.292	0.123089
Rab28	0.0784043	0.113329	0.358	0.256	0.124959
Cmtm7	0.0968541	0.113329	0.452	0.351	0.140443
Fnbp4	0.111524	0.113329	0.309	0.208	0.150973
Zfp821	0.11397	0.113329	0.306	0.185	0.152332
Bace1	0.135128	0.113329	0.37	0.304	0.167506
1810022K09Rik	0.148515	0.113329	0.727	0.631	0.179094
Tada2a	0.259223	0.113329	0.227	0.125	0.273921
Cops9	0.135395	0.113543	0.839	0.756	0.167569
Mff	0.133186	0.113609	0.645	0.583	0.166102
Ogfr	0.0934212	0.113649	0.567	0.476	0.137656
Psma5	0.141905	0.11368	0.87	0.851	0.173467
Vcan	0.137796	0.113694	0.379	0.292	0.169815
Fam107b	0.130556	0.113753	0.291	0.226	0.163694
Eif1b	0.143603	0.113769	0.782	0.708	0.17484
Slc12a4	0.191579	0.113797	0.248	0.143	0.215051
Armc1	0.084132	0.113994	0.542	0.44	0.129921
Golga4	0.0852783	0.11402	0.497	0.387	0.130952
Anapc4	0.078868	0.114047	0.467	0.423	0.125576
2410004B18Rik	0.0750657	0.114092	0.445	0.357	0.12201
Snapin	0.0761433	0.114109	0.409	0.327	0.123089
Vezt	0.0988867	0.114182	0.321	0.22	0.141637
Lpl	0.181989	0.114182	0.255	0.179	0.206549
2022-09-10	0.104568	0.114202	0.3	0.226	0.146825
Nhs	0.165581	0.114202	0.279	0.185	0.192351
Nxf1	0.134189	0.114213	0.782	0.685	0.166631
Zbtb1	0.149192	0.114224	0.285	0.179	0.179513
Mical2	0.265318	0.114224	0.23	0.107	0.279405
Exosc9	0.19766	0.11427	0.255	0.125	0.219141
Kctd10	0.096488	0.114279	0.576	0.476	0.140067
Krit1	0.126052	0.114313	0.512	0.435	0.159757
Mrpl17	0.121372	0.114427	0.679	0.613	0.156579
Mef2c	0.512706	0.114427	0.464	0.369	0.515219
Enho	0.09995	0.114479	0.394	0.292	0.142366
Ube2l3	0.136343	0.11463	0.821	0.774	0.168249
Ercc6l2	0.209343	0.114712	0.245	0.143	0.229494
Aamdc	0.0671223	0.114776	0.509	0.387	0.114667
Cdca8	0.539809	0.114786	0.152	0.101	0.542123
Swt1	0.0970727	0.114806	0.436	0.339	0.140443
Lamb1	0.197528	0.114826	0.694	0.631	0.219141
Daam2	0.107267	0.114868	0.376	0.286	0.148921
Sirt2	0.0725881	0.11498	0.591	0.464	0.118688
Vmp1	0.0860471	0.11498	0.524	0.435	0.131517
Egln2	0.0760461	0.115042	0.524	0.435	0.123089
Mcm5	0.294331	0.115092	0.224	0.155	0.306868
Rabif	0.129879	0.115136	0.276	0.185	0.163219
Fxyd1	0.0942249	0.11521	0.664	0.595	0.138343
mt-Atp8	0.168595	0.115214	0.9	0.875	0.194305
Plekha3	0.223054	0.115231	0.242	0.119	0.241298
Vps36	0.0887442	0.115282	0.539	0.435	0.133523
Arl5a	0.0804255	0.115303	0.388	0.298	0.127264
Hmgcs1	0.0833891	0.115303	0.367	0.286	0.129293
Cped1	0.153868	0.115462	0.555	0.482	0.18248
Zfpm2	0.126976	0.115491	0.294	0.214	0.160308
Klf7	0.0930774	0.115517	0.43	0.292	0.13752
Cript	0.0824714	0.115536	0.585	0.464	0.12869
Epc1	0.116598	0.115544	0.294	0.196	0.153593
Gpx1	0.19261	0.115634	0.806	0.851	0.215618
Tspan17	0.201233	0.115657	0.239	0.143	0.222237
Rnps1	0.0707953	0.1157	0.524	0.446	0.117271
Gng5	0.136064	0.115744	0.988	0.97	0.168157
Tpr	0.248432	0.115767	0.924	0.905	0.264564
Gmfb	0.0986027	0.115874	0.327	0.232	0.141601
Notch1	0.110999	0.115874	0.309	0.238	0.150973
Pag1	0.546341	0.115923	0.133	0.042	0.548347
Dgcr2	0.114997	0.115999	0.297	0.185	0.15288
Cbx1	0.168099	0.116049	0.845	0.851	0.194005
Tbc1d24	0.175471	0.116066	0.261	0.161	0.200399
Ssbp3	0.0873794	0.116122	0.676	0.589	0.132482
Impa1	0.071788	0.116155	0.509	0.381	0.118087
Clptm1	0.0710485	0.116178	0.37	0.28	0.117396
Ankrd29	0.366291	0.116289	0.185	0.089	0.373348
Fhod1	0.0962005	0.116312	0.318	0.226	0.139904
0610012G03Rik	0.118274	0.116347	0.797	0.732	0.155176
Rpl41	0.0164999	0.116402	1	1	0.0471426
Lzts2	0.111451	0.116414	0.694	0.661	0.150973
Cnot6	0.0686873	0.116459	0.506	0.423	0.116076
Rasl11b	0.1166	0.116459	0.445	0.375	0.153593
Pfdn1	0.12162	0.116532	0.803	0.768	0.156683
Tbc1d23	0.170218	0.116537	0.258	0.161	0.1959
Plin3	0.0898894	0.11656	0.63	0.53	0.134506
Ccdc102a	0.0983144	0.11656	0.621	0.554	0.141435
Mapk1	0.0804712	0.11657	0.545	0.458	0.127264
Tnrc6b	0.119239	0.116588	0.739	0.655	0.155453
Rabl6	0.079887	0.116649	0.442	0.345	0.126584
Sem1	0.134219	0.11669	0.976	0.952	0.166631
Ergic3	0.147466	0.116697	0.821	0.774	0.178483
Col6a2	0.292292	0.116792	0.9	0.887	0.305324
Tfg	0.0658429	0.116819	0.506	0.423	0.113071
Mat2a	0.103624	0.116829	0.661	0.542	0.146
Ash2l	0.0682938	0.116887	0.494	0.369	0.116064
Cib1	0.110534	0.116923	0.303	0.167	0.150835
Prkra	0.0939626	0.11705	0.667	0.571	0.138205
Syncrip	0.133885	0.117054	0.642	0.619	0.166631
Uqcrfs1	0.108865	0.117061	0.755	0.685	0.150032
Tbrg1	0.163778	0.117064	0.77	0.708	0.1909
Grb2	0.0754522	0.117176	0.542	0.452	0.122395
Sf3a2	0.067093	0.117199	0.355	0.238	0.114667
Atp5f1	0.153006	0.117256	0.97	0.976	0.182391
Pdlim5	0.158167	0.117348	0.576	0.512	0.185813
Ctnnbip1	0.0692738	0.117368	0.594	0.47	0.116283
Dnajc25	0.0865303	0.117452	0.358	0.256	0.131767
Krt10	0.179688	0.117494	0.248	0.155	0.204644
Mxra8	0.142149	0.117548	0.755	0.667	0.173585
Igfbp4	0.186377	0.117548	0.945	0.923	0.210508
Gabarapl2	0.0873149	0.117619	0.594	0.512	0.132482
Traf4	0.0602659	0.117631	0.464	0.399	0.10639
Mettl23	0.0644512	0.117631	0.488	0.387	0.111666
Trim33	0.0646164	0.117686	0.397	0.304	0.111666
Tspyl1	0.0930729	0.117753	0.312	0.19	0.13752
Mcm7	0.20235	0.117783	0.315	0.214	0.22324
Cux1	0.0848382	0.117864	0.6	0.565	0.130643
Ociad1	0.0851402	0.117864	0.606	0.56	0.130952
Mbnl2	0.193938	0.118146	0.858	0.857	0.216957
Tead2	0.123211	0.118169	0.7	0.625	0.157127
Hivep2	0.0683953	0.1182	0.406	0.339	0.116076
Eef1akmt1	0.0707213	0.1182	0.412	0.369	0.117271
Notch3	0.0793125	0.1182	0.391	0.327	0.125917
Ska2	0.285326	0.118231	0.209	0.101	0.299
Arxes1	0.0874867	0.11841	0.385	0.232	0.132482
Vasp	0.1547	0.11847	0.73	0.637	0.182919
Puf60	0.191819	0.118498	0.755	0.685	0.215174
Cyp20a1	0.0722184	0.118529	0.533	0.452	0.118438
Pdap1	0.119008	0.118535	0.964	0.935	0.155453
Bola2	0.083437	0.118645	0.606	0.56	0.129293
Bcl2	0.0699962	0.118944	0.358	0.292	0.116779
Gng12	0.0752309	0.119014	0.564	0.488	0.122157
Srek1ip1	0.0920672	0.119014	0.552	0.488	0.136643
Copg1	0.0685407	0.119115	0.576	0.482	0.116076
Zfp354c	0.0824088	0.119204	0.336	0.226	0.12869
Uqcc2	0.113264	0.119204	0.77	0.75	0.15194
Snx17	0.0945688	0.119228	0.661	0.643	0.138723
Supt4a	0.118935	0.119292	0.761	0.649	0.155453
Trim47	0.24157	0.11931	0.209	0.137	0.257926
Ube2c	0.43523	0.11931	0.197	0.137	0.440876
Lage3	0.0999804	0.119408	0.655	0.583	0.142366
Ier3ip1	0.097046	0.119452	0.742	0.679	0.140443
Fam198b	0.304908	0.119465	0.203	0.113	0.316888
Tug1	0.05906	0.119525	0.418	0.298	0.105281
Hnrnph2	0.0596823	0.119555	0.53	0.411	0.105815
1110008F13Rik	0.107795	0.119615	0.673	0.655	0.14931
Ctcf	0.107157	0.119622	0.727	0.685	0.148921
Nol11	0.0808109	0.11966	0.361	0.31	0.127629
Pitpnb	0.058545	0.119676	0.521	0.393	0.10459
Phf5a	0.113399	0.119714	0.733	0.702	0.15194
Tmcc1	0.054741	0.119801	0.448	0.351	0.101216
Klf13	0.0901595	0.119801	0.524	0.44	0.134542
Plod3	0.0636251	0.119918	0.558	0.44	0.11077
Cited2	0.174813	0.119948	0.736	0.679	0.199926
Nr2f2	0.223255	0.120031	0.988	0.976	0.241357
Timm22	0.0643144	0.120053	0.482	0.417	0.111666
2810474O19Rik	0.181412	0.120068	0.679	0.577	0.206179
Arid4b	0.113811	0.120078	0.688	0.577	0.152308
Mprip	0.137923	0.120148	0.839	0.815	0.169815
Abracl	0.286558	0.120228	0.842	0.798	0.299907
Zfp846	0.225704	0.12048	0.23	0.113	0.243523
Ndufa3	0.131674	0.120569	0.906	0.863	0.164622
Nsd1	0.107332	0.120575	0.739	0.667	0.148921
Atp6v0e	0.11273	0.120646	0.806	0.78	0.15194
Magohb	0.0730997	0.120673	0.367	0.28	0.119287
Rasl11a	0.192061	0.120673	0.779	0.774	0.215235
Chtop	0.0698504	0.120716	0.582	0.47	0.116773
Zmynd11	0.0622934	0.120798	0.615	0.512	0.109139
Mrps25	0.0542618	0.120817	0.509	0.387	0.100676
Map1b	0.246405	0.120841	0.179	0.161	0.262746
Yipf3	0.0710818	0.120876	0.639	0.53	0.117396
Akap13	0.0717625	0.120904	0.497	0.435	0.118087
Sptan1	0.125578	0.120919	0.636	0.601	0.159279
Rbfox2	0.100364	0.120937	0.752	0.679	0.142572
Hmgb1	0.148517	0.120975	0.997	1	0.179094
Nrbp1	0.0858892	0.121144	0.667	0.625	0.131398
Fgfr1op2	0.0587632	0.121203	0.591	0.423	0.104866
Iscu	0.0784021	0.121203	0.618	0.536	0.124959
Glyr1	0.0688103	0.121336	0.603	0.53	0.116076
Eva1b	0.0958658	0.121433	0.988	0.976	0.139751
Ano6	0.0582732	0.121592	0.452	0.411	0.104332
Psmd11	0.093388	0.121653	0.715	0.714	0.137656
Ndfip1	0.0533606	0.12175	0.364	0.238	0.0995579
Gpr180	0.0565163	0.121932	0.436	0.345	0.102272
Dynlrb1	0.11698	0.122021	0.864	0.827	0.153847
Spcs1	0.115498	0.122032	0.879	0.833	0.15288
Pcyt2	0.237193	0.122041	0.221	0.107	0.254246
Urod	0.0551824	0.122112	0.43	0.315	0.101319
Psma7	0.1568	0.122143	0.921	0.917	0.184965
Bmp1	0.0835671	0.122196	0.606	0.518	0.129293
Cuedc1	0.054743	0.122242	0.515	0.452	0.101216
Ube2a	0.0521941	0.122341	0.455	0.333	0.0983889
Wipi1	0.0434655	0.122348	0.558	0.446	0.0870371
Fam173a	0.0542667	0.122413	0.509	0.405	0.100676
Ipo5	0.0707756	0.122422	0.324	0.226	0.117271
Polr3k	0.0550388	0.122531	0.4	0.345	0.101319
Ccdc12	0.0692225	0.122556	0.63	0.571	0.116283
Tecr	0.0953764	0.122776	0.867	0.821	0.139347
Arhgdib	0.136268	0.122797	0.403	0.333	0.168249
Tmem51	0.190765	0.122853	0.239	0.119	0.214431
Cstf2t	0.258799	0.123109	0.212	0.095	0.273649
Hddc2	0.0532839	0.12317	0.424	0.339	0.0995579
Cdk9	0.0533431	0.123184	0.491	0.405	0.0995579
Tsc22d3	0.0609487	0.123191	0.506	0.429	0.107134
Ctnnb1	0.103578	0.1232	0.885	0.857	0.146
Emp1	0.158782	0.123223	0.576	0.494	0.186268
Vcl	0.150701	0.123242	0.664	0.583	0.180402
Tmem214	0.0728586	0.123379	0.342	0.214	0.119012
Atxn7l3b	0.0881118	0.123379	0.976	0.958	0.13306
Arvcf	0.240966	0.123379	0.212	0.113	0.257449
Cggbp1	0.0891881	0.123516	0.718	0.655	0.133997
Aip	0.0708126	0.12354	0.624	0.589	0.117271
Chd4	0.154532	0.123589	0.815	0.798	0.182852
Set	0.174119	0.123591	0.976	0.988	0.199689
Trib1	0.4154	0.123651	0.173	0.077	0.421309
Gata6	0.138083	0.123764	0.724	0.613	0.169847
[truncated: 993 more rows]

## Sheet: Stroma_cluster5.MutVsCTRL.DEGs
Gene	p_val	avg_logFC	pct.1	pct.2	p_val_adj
[truncated: 2,225 more rows]

## Sheet: Stroma_cluster6.MutVsCTRL.DEGs
Gene	p_val	avg_logFC	pct.1	pct.2	p_val_adj
[truncated: 2,507 more rows]

[truncated: 2 more sheets: Stroma_cluster7.MutVsCTRL.DEGs, Stroma_cluster8.MutVsCTRL.DEGs]
