# Supplementary material for: Smarca4 deficiency induces Pttg1 oncogene upregulation and hyperproliferation of tubular and interstitial cells during kidney development
Source: Front Cell Dev Biol. 2023 Sep 4;11:1233317. doi: 10.3389/fcell.2023.1233317 (PMC10506413; doi:10.3389/fcell.2023.1233317)
Supplement: Supplementary file 7 [file Table5.XLSX]

## Sheet: Tubule_progenitors.0.marker
Gene	Mutant_p_val	Mutant_avg_logFC	Mutant_pct.1	Mutant_pct.2	Mutant_p_val_adj	CTRL_p_val	CTRL_avg_logFC	CTRL_pct.1	CTRL_pct.2	CTRL_p_val_adj	max_pval	minimump_p_val
Cited1	3.29e-72	1.23071	0.98	0.563	6.32e-68	2.1e-78	1.40463	0.951	0.49	4.02e-74	3.29e-72	4.19e-78
Tgfbi	1.48e-57	0.775576	0.964	0.641	2.84e-53	4.71e-87	1.07592	0.988	0.535	9.04e-83	1.48e-57	9.43e-87
Tpm2	2.83e-50	0.717091	0.996	0.844	5.43e-46	2.57e-75	0.981669	0.996	0.754	4.93e-71	2.83e-50	5.14e-75
Mest	3.62e-54	0.787316	0.992	0.929	6.94e-50	2.04e-60	0.924905	0.992	0.826	3.91e-56	3.62e-54	4.08e-60
Gas1	7.48e-62	0.71006	0.996	0.909	1.43e-57	3.37e-78	0.902334	0.996	0.844	6.46e-74	7.48e-62	6.74e-78
Robo2	2.84e-72	0.846436	0.968	0.685	5.44e-68	1.89e-75	0.900725	0.972	0.604	3.63e-71	2.84e-72	3.79e-75
Six2	3.96e-63	0.727145	0.976	0.647	7.6e-59	1.92e-83	0.877734	0.996	0.524	3.68e-79	3.96e-63	3.84e-83
Crym	3.04e-60	0.790175	0.943	0.553	5.83e-56	1.02e-76	0.854132	0.947	0.464	1.95e-72	3.04e-60	2.03e-76
Cped1	1.69e-57	0.654012	0.964	0.662	3.24e-53	4.17e-70	0.788795	0.968	0.577	7.99e-66	1.69e-57	8.34e-70
Ttc28	2.54e-64	0.711659	0.984	0.774	4.87e-60	1.13e-70	0.775044	0.976	0.676	2.16e-66	2.54e-64	2.25e-70
Traf1	7.37e-58	0.605143	0.802	0.337	1.41e-53	3.82e-71	0.772437	0.806	0.27	7.32e-67	7.37e-58	7.63e-71
Fam213a	2.14e-66	0.725204	0.955	0.764	4.1e-62	1.76e-55	0.721281	0.927	0.738	3.38e-51	1.76e-55	4.28e-66
Capn6	1.87e-51	0.557898	0.984	0.752	3.58e-47	2.2e-61	0.686228	0.96	0.653	4.21e-57	1.87e-51	4.39e-61
Vcan	3.69e-38	0.522408	0.992	0.947	7.07e-34	8.59e-52	0.649388	0.992	0.862	1.65e-47	3.69e-38	1.72e-51
Rspo3	3.74e-22	0.54586	0.563	0.303	7.17e-18	8.91e-39	0.649365	0.619	0.243	1.71e-34	3.74e-22	1.78e-38
Ramp2	2.79e-48	0.55306	0.976	0.828	5.34e-44	1.23e-54	0.643531	0.968	0.758	2.35e-50	2.79e-48	2.45e-54
Meis2	1.74e-35	0.480307	1	0.903	3.33e-31	2.25e-47	0.640472	0.988	0.826	4.31e-43	1.74e-35	4.5e-47
Btg2	8.89e-11	0.463181	0.761	0.663	1.7e-06	1.11e-19	0.639876	0.777	0.641	2.13e-15	8.89e-11	2.22e-19
Peg3	1.67e-16	0.414436	0.907	0.851	3.19e-12	1.05e-19	0.633376	0.891	0.777	2.01e-15	1.67e-16	2.09e-19
Meox1	4.04e-25	0.371257	0.543	0.25	7.75e-21	6.27e-52	0.632083	0.668	0.227	1.2e-47	4.04e-25	1.25e-51
Il33	1.21e-14	0.381122	0.466	0.261	2.31e-10	5.48e-28	0.602759	0.591	0.283	1.05e-23	1.21e-14	1.1e-27
Spock2	9.69e-44	0.586539	0.976	0.737	1.86e-39	2.99e-50	0.591997	0.943	0.625	5.74e-46	9.69e-44	5.99e-50
Fxyd6	1.29e-38	0.49545	0.996	0.944	2.48e-34	7.04e-48	0.590848	0.992	0.875	1.35e-43	1.29e-38	1.41e-47
Tril	2.72e-25	0.417245	0.911	0.685	5.21e-21	4.16e-48	0.589305	0.903	0.569	7.97e-44	2.72e-25	8.32e-48
Fzd2	2.23e-19	0.36286	0.883	0.832	4.28e-15	9.36e-48	0.586479	0.964	0.762	1.79e-43	2.23e-19	1.87e-47
Scx	8.93e-54	0.522934	0.862	0.449	1.71e-49	6.46e-53	0.58468	0.802	0.403	1.24e-48	6.46e-53	1.79e-53
Fos	7.79e-09	0.440777	0.765	0.69	0.000149321	5.23e-13	0.583286	0.802	0.723	1e-08	7.79e-09	1.05e-12
Ier2	4.41e-13	0.439275	0.931	0.915	8.45e-09	1.65e-26	0.572691	0.955	0.919	3.17e-22	4.41e-13	3.31e-26
Slc12a2	2.34e-24	0.373911	0.826	0.709	4.48e-20	1.14e-35	0.538797	0.814	0.569	2.18e-31	2.34e-24	2.27e-35
Espn	9.86e-41	0.467778	0.903	0.686	1.89e-36	6.43e-45	0.531707	0.858	0.565	1.23e-40	9.86e-41	1.29e-44
Rspo1	2.41e-33	0.420846	0.964	0.82	4.62e-29	1.89e-47	0.531597	0.943	0.718	3.62e-43	2.41e-33	3.77e-47
Zbtb20	1.87e-33	0.478631	0.955	0.895	3.59e-29	2.34e-37	0.496574	0.984	0.845	4.48e-33	1.87e-33	4.67e-37
Clmp	4.66e-35	0.453265	0.943	0.692	8.93e-31	2.39e-37	0.489884	0.874	0.59	4.59e-33	4.66e-35	4.78e-37
Junb	1.66e-11	0.390291	0.737	0.651	3.18e-07	5.94e-14	0.488067	0.81	0.69	1.14e-09	1.66e-11	1.19e-13
Hs3st6	6.44e-25	0.33724	0.781	0.543	1.24e-20	1.08e-35	0.474386	0.761	0.449	2.07e-31	6.44e-25	2.15e-35
Shisa3	9.66e-12	0.25771	0.571	0.415	1.85e-07	1.35e-27	0.461319	0.628	0.35	2.58e-23	9.66e-12	2.7e-27
Epb41l4aos	9.07e-25	0.331806	0.87	0.798	1.74e-20	2.17e-33	0.460564	0.899	0.766	4.17e-29	9.07e-25	4.34e-33
Egr1	2.34e-19	0.437756	0.895	0.836	4.49e-15	1.5e-23	0.448125	0.935	0.846	2.87e-19	2.34e-19	2.99e-23
Kif26b	4.23e-26	0.382341	0.798	0.543	8.12e-22	3.77e-37	0.442224	0.798	0.453	7.22e-33	4.23e-26	7.53e-37
Grb10	1.16e-31	0.391228	0.992	0.981	2.22e-27	3.18e-35	0.426998	0.98	0.962	6.1e-31	1.16e-31	6.36e-35
Pkdcc	6.64e-17	0.314511	0.955	0.909	1.27e-12	1.37e-25	0.411696	0.939	0.848	2.62e-21	6.64e-17	2.73e-25
Cpxm1	4.47e-26	0.396144	0.887	0.75	8.58e-22	5.63e-30	0.406942	0.846	0.656	1.08e-25	4.47e-26	1.13e-29
Eya1	4.25e-29	0.420466	0.834	0.603	8.16e-25	5.64e-33	0.402956	0.834	0.504	1.08e-28	4.25e-29	1.13e-32
Hmcn1	2.24e-29	0.41646	0.879	0.643	4.29e-25	8.15e-25	0.399801	0.81	0.561	1.56e-20	8.15e-25	4.48e-29
Ocm	1.05e-25	0.343674	0.368	0.102	2.02e-21	1.07e-31	0.396897	0.381	0.088	2.06e-27	1.05e-25	2.14e-31
Bbx	3.69e-20	0.329789	0.911	0.872	7.08e-16	1.3e-27	0.396734	0.939	0.826	2.5e-23	3.69e-20	2.61e-27
Gpc6	3.41e-16	0.338784	0.879	0.819	6.53e-12	1.63e-21	0.396668	0.85	0.778	3.12e-17	3.41e-16	3.26e-21
Sox4	4.17e-19	0.307481	0.98	0.981	8e-15	3.27e-25	0.390103	0.988	0.965	6.27e-21	4.17e-19	6.54e-25
Mfap4	6.67e-30	0.375106	0.911	0.666	1.28e-25	1.43e-29	0.388237	0.838	0.528	2.74e-25	1.43e-29	1.33e-29
Serpinf1	2.66e-18	0.286034	0.81	0.7	5.1e-14	1.47e-29	0.379085	0.773	0.545	2.82e-25	2.66e-18	2.94e-29
Dst	3.94e-14	0.301794	0.842	0.793	7.55e-10	5.73e-22	0.378769	0.887	0.772	1.1e-17	3.94e-14	1.15e-21
Cldn9	2.34e-31	0.399434	0.773	0.505	4.49e-27	1.67e-29	0.378751	0.717	0.452	3.21e-25	1.67e-29	4.69e-31
Eif4a2	8.02e-23	0.290991	0.927	0.903	1.54e-18	3.26e-27	0.378372	0.96	0.921	6.26e-23	8.02e-23	6.53e-27
Itga8	3.35e-26	0.367783	0.741	0.476	6.43e-22	1.03e-29	0.377393	0.672	0.38	1.98e-25	3.35e-26	2.06e-29
Hist3h2ba	2.46e-26	0.452966	0.887	0.824	4.72e-22	1.26e-17	0.376526	0.721	0.548	2.42e-13	1.26e-17	4.92e-26
Slc1a3	2.68e-16	0.325627	0.591	0.411	5.14e-12	5.1e-24	0.376353	0.636	0.385	9.78e-20	2.68e-16	1.02e-23
Ajap1	9.37e-14	0.253396	0.393	0.199	1.8e-09	7.07e-32	0.365844	0.397	0.101	1.36e-27	9.37e-14	1.41e-31
Rem1	2.92e-21	0.344695	0.806	0.663	5.6e-17	2.64e-21	0.34968	0.773	0.539	5.07e-17	2.92e-21	5.28e-21
Ppp1r14a	3.07e-16	0.292191	0.563	0.344	5.89e-12	8.58e-17	0.349033	0.644	0.437	1.65e-12	3.07e-16	1.72e-16
Unc5c	2.21e-15	0.266774	0.806	0.689	4.23e-11	1.3e-19	0.348356	0.785	0.577	2.48e-15	2.21e-15	2.59e-19
Cntfr	1.85e-18	0.299959	0.757	0.591	3.54e-14	1.34e-23	0.346653	0.7	0.464	2.56e-19	1.85e-18	2.67e-23
Rps26	3.27e-56	0.296456	1	1	6.27e-52	1.73e-68	0.345075	1	1	3.33e-64	3.27e-56	3.47e-68
Zeb1	1.04e-13	0.262069	0.692	0.533	2e-09	8.61e-22	0.34499	0.688	0.464	1.65e-17	1.04e-13	1.72e-21
Enho	2e-18	0.286367	0.704	0.527	3.83e-14	1.59e-23	0.342749	0.696	0.496	3.05e-19	2e-18	3.18e-23
Osr1	2.82e-19	0.347217	0.704	0.468	5.4e-15	3.63e-21	0.339392	0.575	0.321	6.96e-17	2.82e-19	7.26e-21
Kdm5b	3.81e-20	0.27495	0.915	0.857	7.3e-16	1.89e-22	0.336977	0.895	0.808	3.62e-18	3.81e-20	3.78e-22
Actn3	1.62e-13	0.263674	0.324	0.143	3.11e-09	1.15e-26	0.333603	0.437	0.147	2.21e-22	1.62e-13	2.3e-26
Tsc22d1	6.25e-32	0.403385	1	0.996	1.2e-27	1.02e-23	0.328817	0.996	0.986	1.96e-19	1.02e-23	1.25e-31
Snhg12	3.53e-23	0.374737	0.87	0.79	6.76e-19	3.55e-20	0.328757	0.798	0.706	6.8e-16	3.55e-20	7.05e-23
Cox7a2l	1.31e-40	0.328966	0.996	0.993	2.51e-36	1.15e-38	0.326978	0.996	0.992	2.21e-34	1.15e-38	2.62e-40
Ogt	3.77e-17	0.29196	0.919	0.895	7.24e-13	8.27e-23	0.326467	0.915	0.818	1.59e-18	3.77e-17	1.65e-22
Foxp1	1.57e-28	0.361672	0.955	0.909	3.01e-24	5.07e-21	0.324412	0.927	0.876	9.72e-17	5.07e-21	3.14e-28
Sobp	1.2e-17	0.304483	0.648	0.477	2.31e-13	5.99e-21	0.323845	0.632	0.433	1.15e-16	1.2e-17	1.2e-20
Acot1	2.21e-28	0.365539	0.931	0.838	4.24e-24	3.01e-22	0.321015	0.911	0.781	5.77e-18	3.01e-22	4.42e-28
Snap91	5.46e-13	0.265091	0.656	0.491	1.05e-08	8.25e-20	0.313591	0.692	0.433	1.58e-15	5.46e-13	1.65e-19
Eef2	2.04e-58	0.343224	1	1	3.9e-54	8.96e-51	0.31271	1	1	1.72e-46	8.96e-51	4.07e-58
Ypel3	1.02e-15	0.279991	0.834	0.771	1.95e-11	1.2e-16	0.311107	0.822	0.784	2.31e-12	1.02e-15	2.41e-16
Rps27	9.97e-55	0.261859	1	1	1.91e-50	1.08e-64	0.310413	1	1	2.07e-60	9.97e-55	2.16e-64
Cdh11	3.49e-14	0.263649	0.907	0.76	6.7e-10	4.57e-16	0.30758	0.846	0.65	8.76e-12	3.49e-14	9.14e-16
Malat1	3.83e-19	0.370554	1	1	7.34e-15	1.71e-14	0.30153	1	1	3.28e-10	1.71e-14	7.66e-19
Gfra1	1.69e-21	0.319134	0.644	0.411	3.24e-17	5.73e-18	0.300769	0.522	0.293	1.1e-13	5.73e-18	3.37e-21
Eef1a1	6.94e-70	0.292663	1	1	1.33e-65	5.32e-72	0.292179	1	1	1.02e-67	6.94e-70	1.06e-71
Sulf2	1.03e-19	0.308494	0.749	0.588	1.98e-15	3.52e-14	0.271686	0.66	0.506	6.76e-10	3.52e-14	2.06e-19
Bcl2	4.28e-24	0.36026	0.806	0.722	8.21e-20	6.07e-10	0.270748	0.733	0.666	1.16e-05	6.07e-10	8.57e-24
Gm14964	3.48e-20	0.29051	0.664	0.452	6.67e-16	6.7e-14	0.263056	0.571	0.416	1.29e-09	6.7e-14	6.96e-20
Pdgfc	2.28e-15	0.270594	0.709	0.569	4.37e-11	1.65e-12	0.262847	0.672	0.567	3.17e-08	1.65e-12	4.56e-15
Rps18	1.48e-41	0.271939	1	1	2.85e-37	1.3e-54	0.262602	1	1	2.5e-50	1.48e-41	2.61e-54
Ctsf	8.16e-16	0.255536	0.623	0.461	1.56e-11	8.94e-15	0.261194	0.587	0.428	1.71e-10	8.94e-15	1.63e-15
Btbd11	5e-21	0.27374	0.474	0.222	9.58e-17	4.35e-19	0.255865	0.417	0.186	8.34e-15	4.35e-19	9.99e-21
Ssrp1	7.93e-20	-0.255521	0.96	0.982	1.52e-15	3.35e-16	-0.251983	0.927	0.973	6.42e-12	3.35e-16	1.59e-19
U2af1	1.66e-23	-0.26648	0.976	0.99	3.18e-19	3.5e-19	-0.25265	0.951	0.99	6.72e-15	3.5e-19	3.31e-23
Lsm5	1.58e-22	-0.284849	0.713	0.922	3.03e-18	5.92e-20	-0.253812	0.721	0.895	1.13e-15	5.92e-20	3.16e-22
Ect2	1.2e-38	-0.265959	0.016	0.495	2.31e-34	5.68e-31	-0.253835	0.036	0.453	1.09e-26	5.68e-31	2.41e-38
Mpp6	1.11e-17	-0.275249	0.834	0.948	2.13e-13	2.1e-15	-0.254094	0.741	0.935	4.03e-11	2.1e-15	2.23e-17
Exo1	3.69e-35	-0.288099	0.073	0.536	7.08e-31	6.12e-32	-0.254306	0.053	0.489	1.17e-27	6.12e-32	7.38e-35
Gja1	5.15e-26	-0.341484	0.316	0.718	9.87e-22	2.04e-18	-0.254823	0.296	0.661	3.91e-14	2.04e-18	1.03e-25
Hist1h3c	2.26e-35	-0.30539	0.036	0.492	4.33e-31	4.12e-31	-0.25505	0.02	0.433	7.91e-27	4.12e-31	4.51e-35
Hey1	1.04e-19	-0.269838	0.182	0.528	1.99e-15	2.33e-15	-0.255877	0.215	0.507	4.47e-11	2.33e-15	2.07e-19
Cnn2	3.16e-07	-0.308547	0.389	0.583	0.00606812	5.38e-06	-0.257102	0.328	0.503	0.103097	5.38e-06	6.33e-07
Chaf1b	2.51e-17	-0.279135	0.312	0.647	4.81e-13	5.06e-18	-0.25765	0.271	0.607	9.7e-14	2.51e-17	1.01e-17
Rdx	7.51e-25	-0.269264	0.96	0.992	1.44e-20	2.41e-22	-0.258755	0.947	0.988	4.62e-18	2.41e-22	1.5e-24
Notch1	4.33e-20	-0.307816	0.239	0.592	8.29e-16	2.67e-14	-0.258853	0.308	0.599	5.12e-10	2.67e-14	8.65e-20
Pgp	4.09e-19	-0.28606	0.498	0.791	7.85e-15	4.34e-16	-0.259081	0.466	0.764	8.32e-12	4.34e-16	8.19e-19
Fen1	2.98e-24	-0.265192	0.304	0.719	5.71e-20	1.92e-23	-0.261998	0.227	0.622	3.67e-19	1.92e-23	5.96e-24
Mecom	4.38e-09	-0.297288	0.138	0.327	8.4e-05	1.52e-05	-0.262436	0.219	0.374	0.291173	1.52e-05	8.77e-09
Ptma	1.38e-39	-0.311141	1	1	2.64e-35	2.79e-30	-0.266041	1	1	5.35e-26	2.79e-30	2.76e-39
Banf1	2.15e-21	-0.266009	0.927	0.986	4.13e-17	1.63e-18	-0.26607	0.935	0.978	3.12e-14	1.63e-18	4.3e-21
Rad51ap1	4.06e-36	-0.284737	0.109	0.595	7.79e-32	3.39e-33	-0.266774	0.065	0.515	6.51e-29	3.39e-33	8.13e-36
Khdrbs3	7.78e-34	-0.378249	0.401	0.828	1.49e-29	1.44e-17	-0.267245	0.433	0.77	2.76e-13	1.44e-17	1.56e-33
Ckap5	1.58e-21	-0.329925	0.494	0.831	3.03e-17	3.78e-14	-0.267539	0.49	0.755	7.24e-10	3.78e-14	3.16e-21
Fkbp2	2.1e-18	-0.254619	0.692	0.891	4.03e-14	9.7e-20	-0.268411	0.64	0.89	1.86e-15	2.1e-18	1.94e-19
Bgn	4.52e-13	-0.360946	0.17	0.415	8.67e-09	1e-10	-0.270135	0.134	0.343	1.92e-06	1e-10	9.04e-13
Rpa2	1.63e-18	-0.278418	0.462	0.78	3.12e-14	1.26e-21	-0.271101	0.308	0.695	2.41e-17	1.63e-18	2.51e-21
Psmc4	9.05e-20	-0.251386	0.838	0.974	1.73e-15	4.17e-21	-0.271726	0.842	0.954	8e-17	9.05e-20	8.34e-21
Bambi	1.27e-29	-0.284032	0.101	0.528	2.44e-25	1.73e-25	-0.272562	0.093	0.479	3.31e-21	1.73e-25	2.54e-29
Erh	7.22e-22	-0.261856	0.939	0.995	1.38e-17	7.02e-21	-0.273634	0.883	0.971	1.35e-16	7.02e-21	1.44e-21
Hist1h1a	6.85e-29	-0.312688	0.069	0.476	1.31e-24	1.88e-24	-0.27478	0.065	0.426	3.61e-20	1.88e-24	1.37e-28
Timp3	2.77e-19	-0.304711	0.117	0.438	5.31e-15	6.43e-16	-0.275011	0.142	0.429	1.23e-11	6.43e-16	5.54e-19
Snrpb	7.52e-25	-0.263103	0.988	0.996	1.44e-20	3.66e-27	-0.275635	0.992	0.995	7.02e-23	7.52e-25	7.32e-27
Rad51	4.51e-37	-0.302472	0.097	0.588	8.64e-33	1.68e-30	-0.277335	0.089	0.517	3.23e-26	1.68e-30	9.01e-37
Cdca2	4.19e-34	-0.301681	0.057	0.51	8.03e-30	8.72e-30	-0.283587	0.049	0.458	1.67e-25	8.72e-30	8.37e-34
Rfc5	2.25e-28	-0.311112	0.401	0.798	4.32e-24	3.47e-22	-0.284022	0.372	0.729	6.66e-18	3.47e-22	4.5e-28
Ndc80	4.06e-39	-0.330547	0.045	0.528	7.78e-35	2.92e-33	-0.284976	0.049	0.494	5.59e-29	2.92e-33	8.12e-39
Oat	7.64e-28	-0.3363	0.47	0.853	1.46e-23	8.93e-22	-0.285302	0.506	0.83	1.71e-17	8.93e-22	1.53e-27
Hist2h2ac	2.66e-28	-0.321124	0.134	0.547	5.1e-24	9.18e-22	-0.287636	0.142	0.496	1.76e-17	9.18e-22	5.32e-28
Topbp1	1.61e-20	-0.255808	0.482	0.819	3.08e-16	4.14e-23	-0.290231	0.389	0.775	7.93e-19	1.61e-20	8.28e-23
Id3	1e-15	-0.412413	0.923	0.978	1.93e-11	3.65e-08	-0.290461	0.919	0.958	0.000700639	3.65e-08	2.01e-15
Kif20a	3.61e-37	-0.28941	0.036	0.513	6.91e-33	2.81e-33	-0.291766	0.02	0.447	5.39e-29	2.81e-33	7.21e-37
Cdc45	1.65e-27	-0.259875	0.121	0.538	3.16e-23	1.58e-37	-0.292102	0.049	0.528	3.03e-33	1.65e-27	3.16e-37
Uqcrq	2.2e-25	-0.304891	0.935	0.99	4.21e-21	4.57e-26	-0.294937	0.903	0.98	8.75e-22	2.2e-25	9.13e-26
Gins2	5.52e-21	-0.262441	0.409	0.774	1.06e-16	7.14e-24	-0.295325	0.316	0.717	1.37e-19	5.52e-21	1.43e-23
Lama4	9.61e-32	-0.334022	0.077	0.51	1.84e-27	9.07e-22	-0.295333	0.097	0.437	1.74e-17	9.07e-22	1.92e-31
Bcam	3.32e-11	-0.269708	0.591	0.817	6.36e-07	3.15e-16	-0.296194	0.441	0.753	6.04e-12	3.32e-11	6.3e-16
Ywhah	1.44e-21	-0.262884	0.737	0.939	2.75e-17	5.28e-22	-0.29645	0.623	0.895	1.01e-17	1.44e-21	1.06e-21
Aspm	1.12e-29	-0.291968	0.024	0.417	2.14e-25	1.65e-29	-0.297147	0.008	0.396	3.17e-25	1.65e-29	2.24e-29
Ppa1	6.6e-17	-0.282711	0.838	0.963	1.27e-12	9.66e-20	-0.297431	0.741	0.95	1.85e-15	6.6e-17	1.93e-19
Kif4	1.76e-42	-0.328812	0.036	0.546	3.38e-38	2.07e-35	-0.297725	0.032	0.49	3.96e-31	2.07e-35	3.52e-42
Atp5k	2.01e-36	-0.309914	1	1	3.85e-32	1.09e-29	-0.298898	0.976	0.997	2.09e-25	1.09e-29	4.01e-36
Nde1	7.05e-25	-0.311149	0.368	0.759	1.35e-20	3.08e-21	-0.299545	0.3	0.676	5.91e-17	3.08e-21	1.41e-24
Lsm6	3.06e-29	-0.338941	0.802	0.965	5.87e-25	8.87e-25	-0.300621	0.757	0.944	1.7e-20	8.87e-25	6.12e-29
Anapc11	6.3e-24	-0.254793	0.64	0.926	1.21e-19	2.17e-25	-0.302367	0.575	0.892	4.16e-21	6.3e-24	4.34e-25
Hnrnpab	4.73e-21	-0.300018	0.976	0.995	9.07e-17	1.02e-21	-0.30269	0.972	0.992	1.95e-17	4.73e-21	2.03e-21
Calm2	1.5e-19	-0.284999	1	0.999	2.88e-15	3.66e-17	-0.305706	0.992	0.995	7.01e-13	3.66e-17	3e-19
Ncapd2	2.11e-35	-0.273485	0.117	0.613	4.04e-31	4.31e-36	-0.305841	0.081	0.558	8.26e-32	2.11e-35	8.62e-36
Cyc1	1.06e-20	-0.250734	0.939	0.977	2.04e-16	8.53e-24	-0.307001	0.814	0.96	1.64e-19	1.06e-20	1.71e-23
Gxylt2	3.16e-19	-0.281803	0.356	0.683	6.05e-15	2.74e-21	-0.307273	0.255	0.633	5.25e-17	3.16e-19	5.47e-21
Bub1	1.48e-41	-0.328758	0.04	0.55	2.83e-37	7.47e-36	-0.307619	0.057	0.528	1.43e-31	7.47e-36	2.95e-41
Sf3b5	1.74e-24	-0.287086	0.858	0.973	3.33e-20	1.55e-25	-0.309028	0.826	0.951	2.98e-21	1.74e-24	3.11e-25
Marcks	5.73e-28	-0.380212	0.935	0.989	1.1e-23	5.79e-16	-0.310925	0.887	0.964	1.11e-11	5.79e-16	1.15e-27
Atp5o.1	3.55e-25	-0.260297	0.996	0.997	6.8e-21	1.26e-31	-0.311297	0.98	0.994	2.41e-27	3.55e-25	2.51e-31
Rfc3	1.59e-14	-0.260357	0.64	0.847	3.04e-10	4.72e-21	-0.312232	0.482	0.825	9.05e-17	1.59e-14	9.44e-21
Aurka	5.19e-31	-0.348954	0.061	0.479	9.95e-27	1.86e-27	-0.312616	0.057	0.435	3.57e-23	1.86e-27	1.04e-30
Rad21	2.54e-20	-0.310306	0.644	0.891	4.87e-16	1.72e-18	-0.312857	0.611	0.86	3.3e-14	1.72e-18	5.08e-20
Tceal9	1.18e-25	-0.29622	0.972	0.992	2.25e-21	1.38e-23	-0.313261	0.972	0.991	2.65e-19	1.38e-23	2.35e-25
1810037I17Rik	2.41e-18	-0.26052	0.672	0.903	4.61e-14	6.01e-21	-0.313999	0.68	0.9	1.15e-16	2.41e-18	1.2e-20
Eif5a	1.55e-22	-0.273705	0.996	0.999	2.97e-18	1.11e-25	-0.314838	0.996	0.999	2.13e-21	1.55e-22	2.22e-25
Lsm4	3.42e-30	-0.341724	0.919	0.995	6.56e-26	2.13e-27	-0.316461	0.939	0.982	4.08e-23	2.13e-27	6.84e-30
Dtymk	8.09e-19	-0.271759	0.794	0.941	1.55e-14	3.29e-24	-0.31665	0.773	0.939	6.3e-20	8.09e-19	6.57e-24
Mad2l1	2.47e-47	-0.333935	0.085	0.666	4.74e-43	1.37e-37	-0.31748	0.101	0.597	2.63e-33	1.37e-37	4.94e-47
Hmgcs1	2.64e-19	-0.299633	0.397	0.746	5.05e-15	1.57e-19	-0.318914	0.3	0.645	3.02e-15	2.64e-19	3.15e-19
Slc25a5	1.21e-14	-0.253964	0.96	0.99	2.32e-10	7.91e-19	-0.320625	0.951	0.981	1.52e-14	1.21e-14	1.58e-18
Nsmce4a	7.18e-19	-0.281863	0.846	0.962	1.38e-14	1.59e-24	-0.321434	0.789	0.945	3.05e-20	7.18e-19	3.18e-24
Ncapg	2.45e-41	-0.321027	0.045	0.551	4.69e-37	1.13e-43	-0.322698	0.008	0.529	2.16e-39	2.45e-41	2.26e-43
Aldh1a2	4.31e-12	-0.28537	0.587	0.843	8.26e-08	6.39e-10	-0.324333	0.769	0.899	1.23e-05	6.39e-10	8.62e-12
Jpt1	4.63e-13	-0.333995	0.915	0.969	8.88e-09	2.47e-13	-0.324738	0.895	0.96	4.73e-09	4.63e-13	4.94e-13
Ndufa12	6.93e-25	-0.304708	0.947	0.992	1.33e-20	4.93e-27	-0.324856	0.943	0.986	9.44e-23	6.93e-25	9.85e-27
Mcm3	1.04e-14	-0.301473	0.615	0.839	1.99e-10	3.26e-18	-0.326334	0.498	0.794	6.24e-14	1.04e-14	6.51e-18
Cdkn1c	0.721151	-0.524541	0.935	0.943	1	0.039449	-0.327878	0.931	0.901	1	0.721151	0.0773417
Snrpd1	6.08e-27	-0.288656	0.984	0.997	1.16e-22	2.27e-30	-0.328942	0.972	0.996	4.35e-26	6.08e-27	4.54e-30
Hspa5	6.84e-23	-0.343319	0.992	0.993	1.31e-18	1.97e-19	-0.32904	0.972	0.988	3.77e-15	1.97e-19	1.37e-22
Mgp	6.71e-15	-0.435229	0.275	0.576	1.29e-10	2.59e-08	-0.330368	0.263	0.487	0.000496186	2.59e-08	1.34e-14
Tk1	4.31e-37	-0.330624	0.101	0.592	8.26e-33	7.67e-34	-0.330532	0.081	0.539	1.47e-29	7.67e-34	8.62e-37
Actb	2.91e-23	-0.308376	1	1	5.58e-19	1.28e-21	-0.330602	1	1	2.45e-17	1.28e-21	5.82e-23
Pdzd2	1.7e-32	-0.398487	0.101	0.542	3.27e-28	1.15e-21	-0.331125	0.097	0.434	2.2e-17	1.15e-21	3.41e-32
Anp32b	3.45e-32	-0.309017	0.996	1	6.61e-28	2.13e-32	-0.33197	0.996	1	4.08e-28	3.45e-32	4.26e-32
Cox6c	1.14e-28	-0.252897	0.996	1	2.18e-24	2.14e-34	-0.332256	1	1	4.11e-30	1.14e-28	4.28e-34
Tpm4	6.44e-22	-0.342942	0.794	0.951	1.23e-17	3.08e-21	-0.332476	0.789	0.939	5.91e-17	3.08e-21	1.29e-21
Dlgap5	7.11e-33	-0.308668	0.081	0.531	1.36e-28	3.94e-38	-0.334375	0.04	0.526	7.56e-34	7.11e-33	7.88e-38
Tuba1c	5.56e-24	-0.25618	0.089	0.46	1.07e-19	6.73e-29	-0.334976	0.069	0.475	1.29e-24	5.56e-24	1.35e-28
Maged2	4.39e-06	-0.320153	0.838	0.913	0.0841004	1.8e-12	-0.335248	0.704	0.901	3.45e-08	4.39e-06	3.6e-12
Mylk	3.21e-19	-0.353296	0.3	0.638	6.15e-15	8.05e-20	-0.335318	0.206	0.556	1.54e-15	3.21e-19	1.61e-19
Cfh	1.12e-14	-0.403987	0.101	0.353	2.15e-10	1.16e-07	-0.33633	0.134	0.294	0.00221616	1.16e-07	2.25e-14
Sfrp1	6.23e-16	-0.431799	0.243	0.532	1.2e-11	8.19e-14	-0.336449	0.158	0.419	1.57e-09	8.19e-14	1.25e-15
Srsf7	1.15e-26	-0.340694	0.955	0.989	2.21e-22	9.27e-24	-0.336476	0.919	0.985	1.78e-19	9.27e-24	2.3e-26
Gucy1a1	6.29e-17	-0.330411	0.142	0.442	1.21e-12	6.16e-10	-0.338376	0.19	0.397	1.18e-05	6.16e-10	1.26e-16
Akap12	5.88e-10	-0.377414	0.437	0.655	1.13e-05	1.48e-05	-0.339486	0.466	0.627	0.282859	1.48e-05	1.18e-09
Snrpa1	2.88e-23	-0.28791	0.85	0.967	5.53e-19	8.36e-25	-0.339852	0.733	0.93	1.6e-20	2.88e-23	1.67e-24
Hnrnpd	8.31e-22	-0.267668	0.992	0.997	1.59e-17	4.51e-28	-0.340337	0.98	1	8.65e-24	8.31e-22	9.02e-28
Melk	1.04e-45	-0.361806	0.053	0.593	2e-41	1.68e-44	-0.340835	0.032	0.562	3.21e-40	1.68e-44	2.09e-45
Kif2c	4.82e-38	-0.346819	0.045	0.527	9.24e-34	4.16e-36	-0.341808	0.016	0.466	7.97e-32	4.16e-36	9.64e-38
Jag1	4.88e-27	-0.292854	0.045	0.43	9.35e-23	1.57e-32	-0.342041	0.053	0.492	3.01e-28	4.88e-27	3.14e-32
Plk4	2.25e-36	-0.312306	0.178	0.679	4.32e-32	7.43e-39	-0.343989	0.093	0.608	1.43e-34	2.25e-36	1.49e-38
Anp32e	1.19e-26	-0.370434	0.838	0.962	2.28e-22	6.8e-22	-0.344815	0.818	0.948	1.3e-17	6.8e-22	2.38e-26
Prdx4	2.13e-27	-0.329313	0.806	0.962	4.08e-23	2.13e-26	-0.34512	0.757	0.948	4.09e-22	2.13e-26	4.26e-27
Prdx1	5.27e-34	-0.312121	1	0.999	1.01e-29	7.69e-36	-0.346362	0.988	0.996	1.47e-31	5.27e-34	1.54e-35
C1qtnf12	1.29e-05	-0.409986	0.753	0.879	0.246482	0.220569	-0.34655	0.737	0.77	1	0.220569	2.57e-05
Hnrnpa2b1	5.34e-21	-0.27125	0.996	1	1.02e-16	1.65e-29	-0.349638	0.996	0.997	3.17e-25	5.34e-21	3.31e-29
Shcbp1	1.58e-47	-0.348983	0.049	0.611	3.04e-43	2.25e-43	-0.350678	0.04	0.567	4.31e-39	2.25e-43	3.17e-47
Pimreg	1.54e-37	-0.401939	0.053	0.532	2.95e-33	1.01e-34	-0.351499	0.032	0.48	1.93e-30	1.01e-34	3.08e-37
Hjurp	2.91e-17	-0.267291	0.474	0.767	5.57e-13	6.01e-25	-0.351615	0.389	0.755	1.15e-20	2.91e-17	1.2e-24
Mrpl18	3.18e-24	-0.297346	0.891	0.973	6.09e-20	3.81e-32	-0.351964	0.826	0.96	7.3e-28	3.18e-24	7.62e-32
Hnf1b	2.76e-17	-0.256477	0.028	0.289	5.3e-13	9.16e-27	-0.352724	0.053	0.425	1.76e-22	2.76e-17	1.83e-26
Rrm1	4.74e-42	-0.44293	0.405	0.859	9.09e-38	2.43e-29	-0.352995	0.425	0.808	4.65e-25	2.43e-29	9.49e-42
Rai14	1.07e-35	-0.407794	0.235	0.712	2.05e-31	9.43e-23	-0.353121	0.247	0.621	1.81e-18	9.43e-23	2.14e-35
Kdm2b	2.96e-12	-0.255182	0.453	0.748	5.68e-08	2.11e-15	-0.353159	0.429	0.736	4.04e-11	2.96e-12	4.21e-15
Prim1	3.64e-21	-0.276588	0.401	0.742	6.99e-17	1.14e-33	-0.353254	0.259	0.732	2.19e-29	3.64e-21	2.29e-33
Hirip3	2.98e-20	-0.33895	0.575	0.873	5.72e-16	6.09e-20	-0.353452	0.555	0.831	1.17e-15	6.09e-20	5.96e-20
Rbpms	4.94e-21	-0.3069	0.51	0.814	9.47e-17	4.56e-24	-0.353493	0.445	0.81	8.75e-20	4.94e-21	9.13e-24
Hes5	3.16e-10	-0.283875	0.004	0.151	6.07e-06	4.21e-12	-0.353628	0.004	0.178	8.07e-08	3.16e-10	8.42e-12
Prnp	1.45e-20	-0.257234	0.065	0.393	2.77e-16	1.91e-17	-0.35382	0.105	0.407	3.67e-13	1.91e-17	2.89e-20
Fbln1	3.04e-38	-0.463339	0.377	0.829	5.82e-34	1.9e-25	-0.354969	0.401	0.771	3.63e-21	1.9e-25	6.08e-38
Hsp90aa1	1.39e-32	-0.361852	1	1	2.66e-28	3.7e-30	-0.355078	1	0.999	7.09e-26	3.7e-30	2.77e-32
Calr	1.46e-27	-0.373552	0.968	0.992	2.81e-23	3.05e-22	-0.355249	0.976	0.994	5.84e-18	3.05e-22	2.93e-27
Sgo2a	2.6e-38	-0.341528	0.057	0.54	4.99e-34	7.11e-36	-0.35583	0.04	0.502	1.36e-31	7.11e-36	5.2e-38
Hmgn5	1.13e-22	-0.311027	0.457	0.793	2.17e-18	4.96e-23	-0.358177	0.482	0.802	9.51e-19	1.13e-22	9.92e-23
Clic4	1.06e-21	-0.250465	0.364	0.734	2.02e-17	9.64e-29	-0.358232	0.352	0.767	1.85e-24	1.06e-21	1.93e-28
Id4	2.9e-27	-0.271665	0.113	0.518	5.56e-23	1.08e-31	-0.359431	0.097	0.542	2.07e-27	2.9e-27	2.16e-31
Myl9	6.56e-07	-0.438715	0.385	0.561	0.0125726	0.00425783	-0.361938	0.36	0.457	1	0.00425783	1.31e-06
Tmsb10	3.08e-28	-0.309692	0.996	1	5.9e-24	7.14e-30	-0.361982	1	0.999	1.37e-25	3.08e-28	1.43e-29
Psip1	1.94e-26	-0.330439	0.915	0.986	3.73e-22	1.06e-26	-0.3631	0.911	0.976	2.03e-22	1.94e-26	2.11e-26
Srsf2	5.24e-21	-0.259404	0.984	0.997	1e-16	2.35e-32	-0.363189	0.943	0.991	4.51e-28	5.24e-21	4.7e-32
Esco2	2.04e-41	-0.342942	0.02	0.523	3.91e-37	8.94e-40	-0.363645	0.012	0.498	1.71e-35	8.94e-40	4.08e-41
Dcn	0.00477737	-0.511807	0.328	0.441	1	0.00699025	-0.364632	0.178	0.262	1	0.00699025	0.00953192
Ndufa4	3.06e-29	-0.268676	0.996	0.999	5.87e-25	6.39e-43	-0.364902	0.992	0.999	1.23e-38	3.06e-29	1.28e-42
Ybx1	3.4e-43	-0.33528	1	1	6.51e-39	3.16e-43	-0.365158	1	1	6.05e-39	3.4e-43	6.31e-43
Tenm4	1.06e-34	-0.341937	0.101	0.566	2.04e-30	4.86e-32	-0.365916	0.126	0.581	9.31e-28	4.86e-32	2.12e-34
Hmgn1	1.51e-44	-0.375354	1	1	2.9e-40	5.65e-43	-0.368425	1	1	1.08e-38	5.65e-43	3.02e-44
Rfc4	2.91e-29	-0.355251	0.51	0.854	5.57e-25	2.3e-28	-0.368823	0.457	0.812	4.41e-24	2.3e-28	5.81e-29
Tipin	3.82e-19	-0.295396	0.595	0.854	7.33e-15	3.59e-26	-0.373782	0.518	0.826	6.88e-22	3.82e-19	7.17e-26
Pmp22	2.56e-28	-0.445114	0.065	0.46	4.91e-24	1.07e-21	-0.374184	0.053	0.378	2.05e-17	1.07e-21	5.12e-28
Nme1	3.16e-23	-0.331417	0.988	1	6.06e-19	2.84e-28	-0.374421	0.996	0.994	5.44e-24	3.16e-23	5.67e-28
Lhx1os	1.41e-24	-0.277364	0.016	0.355	2.7e-20	2.87e-32	-0.374653	0.016	0.43	5.51e-28	1.41e-24	5.75e-32
S100a16	2.16e-27	-0.323834	0.239	0.675	4.14e-23	2.66e-34	-0.374661	0.239	0.702	5.1e-30	2.16e-27	5.32e-34
Lsm3	3.13e-31	-0.361128	0.806	0.95	6e-27	1.43e-34	-0.375318	0.729	0.945	2.75e-30	3.13e-31	2.87e-34
Siva1	3.73e-26	-0.386507	0.98	0.992	7.16e-22	1.21e-21	-0.375414	0.955	0.987	2.31e-17	1.21e-21	7.47e-26
Npy	2.15e-22	-0.253791	0.016	0.329	4.12e-18	2.56e-20	-0.376016	0.036	0.335	4.91e-16	2.56e-20	4.3e-22
Smc1a	2.06e-20	-0.289947	0.939	0.984	3.95e-16	6.93e-30	-0.378899	0.915	0.976	1.33e-25	2.06e-20	1.39e-29
Prss23	5.65e-20	-0.301261	0.053	0.36	1.08e-15	2.4e-26	-0.379462	0.032	0.398	4.6e-22	5.65e-20	4.8e-26
Sgo1	1.16e-40	-0.354105	0.081	0.592	2.22e-36	1.19e-39	-0.379949	0.085	0.594	2.29e-35	1.19e-39	2.32e-40
Ddx39	7.83e-26	-0.350996	0.652	0.894	1.5e-21	4.56e-31	-0.381772	0.591	0.883	8.74e-27	7.83e-26	9.12e-31
Uqcc2	9.41e-23	-0.321152	0.676	0.911	1.8e-18	1.38e-29	-0.382597	0.611	0.894	2.65e-25	9.41e-23	2.77e-29
Srsf3	8.68e-23	-0.280387	0.996	1	1.66e-18	3.63e-38	-0.382898	1	0.997	6.95e-34	8.68e-23	7.25e-38
Lamc1	5.2e-22	-0.325905	0.478	0.808	9.96e-18	2.7e-29	-0.384534	0.393	0.782	5.18e-25	5.2e-22	5.4e-29
Manf	6.71e-23	-0.35229	0.858	0.952	1.29e-18	1.09e-25	-0.385977	0.741	0.94	2.09e-21	6.71e-23	2.18e-25
Cenph	6.18e-48	-0.400888	0.142	0.716	1.19e-43	3.27e-44	-0.389839	0.117	0.661	6.28e-40	3.27e-44	1.24e-47
Atp2b1	1.64e-17	-0.396234	0.725	0.913	3.15e-13	1.09e-21	-0.392336	0.64	0.878	2.08e-17	1.64e-17	2.17e-21
Txn1	1.14e-29	-0.313839	0.992	1	2.18e-25	2.37e-39	-0.396042	0.964	1	4.55e-35	1.14e-29	4.74e-39
Dut	1.46e-20	-0.345946	0.931	0.978	2.8e-16	8.77e-23	-0.396142	0.887	0.962	1.68e-18	1.46e-20	1.75e-22
Plk1	6.48e-35	-0.421805	0.061	0.512	1.24e-30	2.17e-34	-0.396803	0.028	0.471	4.16e-30	2.17e-34	1.3e-34
Dach1	4.87e-38	-0.404957	0.211	0.696	9.34e-34	2.03e-33	-0.398384	0.251	0.711	3.89e-29	2.03e-33	9.74e-38
Tagln2	6.92e-24	-0.350751	0.259	0.633	1.33e-19	4.67e-31	-0.399176	0.17	0.609	8.96e-27	6.92e-24	9.34e-31
Cycs	3.86e-30	-0.405796	0.781	0.955	7.4e-26	5.29e-29	-0.400637	0.709	0.915	1.01e-24	5.29e-29	7.72e-30
Dbf4	2.88e-37	-0.363301	0.194	0.688	5.52e-33	3.38e-42	-0.402229	0.146	0.675	6.48e-38	2.88e-37	6.76e-42
Hells	1.06e-19	-0.34732	0.417	0.754	2.04e-15	2.55e-29	-0.403778	0.304	0.725	4.88e-25	1.06e-19	5.09e-29
Dhfr	1.03e-25	-0.346345	0.328	0.73	1.97e-21	3.95e-35	-0.404817	0.243	0.707	7.58e-31	1.03e-25	7.91e-35
Myl12a	4.64e-21	-0.301983	0.911	0.975	8.9e-17	9.39e-27	-0.404882	0.814	0.972	1.8e-22	4.64e-21	1.88e-26
Cox5a	2.18e-34	-0.364297	0.988	0.999	4.18e-30	1.98e-42	-0.405139	0.984	0.996	3.8e-38	2.18e-34	3.96e-42
Knl1	3.01e-47	-0.396579	0.036	0.588	5.76e-43	1.06e-41	-0.406292	0.036	0.547	2.03e-37	1.06e-41	6.01e-47
Ckap2l	8.93e-39	-0.387285	0.061	0.546	1.71e-34	1.11e-37	-0.406294	0.045	0.515	2.12e-33	1.11e-37	1.79e-38
Rnaseh2c	3.04e-32	-0.349532	0.806	0.962	5.82e-28	1.92e-35	-0.40665	0.733	0.953	3.68e-31	3.04e-32	3.84e-35
Bub1b	1.31e-42	-0.372861	0.073	0.593	2.52e-38	6.99e-44	-0.407151	0.024	0.547	1.34e-39	1.31e-42	1.4e-43
Mis18bp1	2.3e-38	-0.422285	0.105	0.587	4.41e-34	1.76e-37	-0.407265	0.053	0.531	3.37e-33	1.76e-37	4.6e-38
Uhrf1	5.63e-31	-0.374035	0.348	0.767	1.08e-26	4.51e-34	-0.408087	0.267	0.714	8.65e-30	5.63e-31	9.03e-34
Mcm7	4.18e-13	-0.28727	0.834	0.95	8.01e-09	1.7e-23	-0.409979	0.781	0.935	3.26e-19	4.18e-13	3.4e-23
Kif11	1.89e-37	-0.395479	0.057	0.536	3.62e-33	1.26e-36	-0.410588	0.04	0.504	2.42e-32	1.26e-36	3.77e-37
Bub3	1.32e-17	-0.350034	0.709	0.909	2.53e-13	6.47e-26	-0.414937	0.587	0.848	1.24e-21	1.32e-17	1.29e-25
Knstrn	1.17e-24	-0.341145	0.308	0.722	2.25e-20	1.12e-33	-0.416802	0.206	0.68	2.15e-29	1.17e-24	2.24e-33
Alyref	2.28e-40	-0.433424	0.789	0.974	4.38e-36	7.79e-34	-0.41759	0.721	0.932	1.49e-29	7.79e-34	4.57e-40
Rangap1	4.31e-39	-0.455026	0.304	0.772	8.27e-35	3.99e-35	-0.418047	0.235	0.702	7.66e-31	3.99e-35	8.62e-39
Cenpm	1.31e-42	-0.386127	0.251	0.767	2.52e-38	1.86e-51	-0.421278	0.162	0.732	3.57e-47	1.31e-42	3.72e-51
Stard10	1.31e-11	-0.270437	0.206	0.457	2.52e-07	5.14e-18	-0.423126	0.194	0.507	9.86e-14	1.31e-11	1.03e-17
Kif20b	1.98e-38	-0.409651	0.126	0.61	3.8e-34	8.52e-42	-0.426991	0.065	0.577	1.63e-37	1.98e-38	1.7e-41
Cenpk	1.45e-39	-0.333731	0.174	0.69	2.78e-35	1.4e-44	-0.427853	0.134	0.676	2.67e-40	1.45e-39	2.79e-44
Rcn1	1.28e-21	-0.415357	0.749	0.928	2.46e-17	9.75e-21	-0.428034	0.709	0.915	1.87e-16	9.75e-21	2.56e-21
Lockd	1.5e-40	-0.402023	0.097	0.615	2.88e-36	7.96e-42	-0.428078	0.065	0.584	1.53e-37	1.5e-40	1.59e-41
Ezh2	2.9e-31	-0.418379	0.777	0.955	5.56e-27	3.25e-34	-0.431996	0.781	0.948	6.23e-30	2.9e-31	6.5e-34
Col4a1	6.85e-16	-0.364661	0.883	0.948	1.31e-11	4.11e-21	-0.44104	0.794	0.927	7.88e-17	6.85e-16	8.22e-21
Clspn	2.64e-37	-0.437933	0.17	0.658	5.06e-33	7.75e-44	-0.441193	0.085	0.629	1.49e-39	2.64e-37	1.55e-43
Epha4	1.83e-17	-0.385669	0.19	0.495	3.51e-13	6.7e-28	-0.442261	0.117	0.522	1.28e-23	1.83e-17	1.34e-27
Fdps	5.8e-24	-0.439539	0.498	0.82	1.11e-19	1.31e-30	-0.442776	0.308	0.732	2.52e-26	5.8e-24	2.63e-30
Tmpo	2.73e-28	-0.362667	0.842	0.963	5.24e-24	1.04e-35	-0.443494	0.773	0.945	1.99e-31	2.73e-28	2.08e-35
Pcp4	0.0204328	-0.268781	0.437	0.55	1	6.46e-11	-0.448169	0.267	0.522	1.24e-06	0.0204328	1.29e-10
Mcm5	3.62e-19	-0.317592	0.466	0.797	6.93e-15	1.1e-35	-0.450027	0.308	0.75	2.11e-31	3.62e-19	2.2e-35
Meg3	5.89e-10	-0.637719	0.263	0.471	1.13e-05	7.68e-06	-0.450195	0.186	0.319	0.147301	7.68e-06	1.18e-09
Selenoh	1.02e-44	-0.464077	0.951	0.993	1.96e-40	4.47e-44	-0.452538	0.943	0.988	8.57e-40	4.47e-44	2.04e-44
Kif15	2.35e-52	-0.466036	0.057	0.653	4.51e-48	7.89e-44	-0.456449	0.081	0.611	1.51e-39	7.89e-44	4.71e-52
Kif22	1.12e-37	-0.423668	0.117	0.6	2.14e-33	1.97e-42	-0.45724	0.069	0.585	3.78e-38	1.12e-37	3.94e-42
Hist1h4d	7.35e-21	-0.445821	0.368	0.685	1.41e-16	4.66e-23	-0.458965	0.324	0.667	8.94e-19	7.35e-21	9.32e-23
Pdia6	3.55e-41	-0.436652	0.968	0.993	6.8e-37	4.84e-41	-0.459343	0.939	0.991	9.27e-37	4.84e-41	7.09e-41
Tacc3	3.61e-47	-0.500724	0.146	0.683	6.93e-43	2.37e-39	-0.461236	0.134	0.622	4.55e-35	2.37e-39	7.22e-47
Ptpn13	4.64e-37	-0.364473	0.146	0.63	8.89e-33	1.73e-45	-0.465311	0.15	0.684	3.31e-41	4.64e-37	3.45e-45
Emx2	2.81e-17	-0.370773	0.045	0.31	5.4e-13	1.43e-26	-0.467503	0.04	0.406	2.73e-22	2.81e-17	2.85e-26
Dnajc9	1.53e-29	-0.408499	0.672	0.892	2.94e-25	4.99e-37	-0.467852	0.526	0.867	9.56e-33	1.53e-29	9.98e-37
Igfbp4	7.96e-34	-0.546575	0.802	0.95	1.53e-29	3.25e-21	-0.473345	0.672	0.876	6.22e-17	3.25e-21	1.59e-33
Hmgb3	8.77e-41	-0.502488	0.968	0.99	1.68e-36	1.55e-34	-0.473969	0.919	0.982	2.97e-30	1.55e-34	1.75e-40
Lsm2	6.56e-45	-0.47895	0.725	0.944	1.26e-40	8.27e-40	-0.475101	0.636	0.915	1.59e-35	8.27e-40	1.31e-44
Mdk	9.92e-22	-0.335755	0.996	0.999	1.9e-17	6.44e-37	-0.478907	0.988	0.995	1.24e-32	9.92e-22	1.29e-36
Tubb5	3.61e-29	-0.41394	1	1	6.92e-25	4.03e-35	-0.487759	1	1	7.74e-31	3.61e-29	8.07e-35
Ccdc34	3.33e-23	-0.346553	0.911	0.969	6.39e-19	2.08e-34	-0.490809	0.838	0.963	3.99e-30	3.33e-23	4.16e-34
Bmp4	6.86e-39	-0.444619	0.158	0.666	1.31e-34	7.03e-40	-0.491577	0.15	0.665	1.35e-35	6.86e-39	1.41e-39
Aurkb	2.66e-49	-0.508705	0.045	0.604	5.09e-45	1.74e-44	-0.492159	0.04	0.562	3.33e-40	1.74e-44	5.31e-49
Id2	7.25e-29	-0.496847	0.437	0.836	1.39e-24	4.11e-26	-0.493585	0.506	0.846	7.88e-22	4.11e-26	1.45e-28
Ranbp1	2.42e-41	-0.494969	0.972	0.996	4.64e-37	5.15e-38	-0.494862	0.951	0.99	9.87e-34	5.15e-38	4.83e-41
Usp1	1.02e-29	-0.361353	0.603	0.894	1.95e-25	7.64e-43	-0.494906	0.474	0.864	1.46e-38	1.02e-29	1.53e-42
Dynll1	1.41e-26	-0.349404	0.992	1	2.7e-22	1.11e-39	-0.4956	0.988	0.997	2.13e-35	1.41e-26	2.23e-39
Basp1	1.25e-29	-0.632132	0.619	0.896	2.39e-25	7.62e-23	-0.495824	0.538	0.839	1.46e-18	7.62e-23	2.5e-29
Fstl1	6.05e-16	-0.383456	0.692	0.862	1.16e-11	1.61e-19	-0.497656	0.664	0.848	3.09e-15	6.05e-16	3.23e-19
Fn1	4.35e-33	-0.611996	0.198	0.64	8.34e-29	4.06e-29	-0.501127	0.126	0.531	7.78e-25	4.06e-29	8.7e-33
Kif23	2.33e-45	-0.542839	0.065	0.599	4.48e-41	1.93e-47	-0.509289	0.045	0.602	3.7e-43	2.33e-45	3.86e-47
Incenp	4.31e-38	-0.503914	0.186	0.647	8.26e-34	7.46e-44	-0.509411	0.097	0.621	1.43e-39	4.31e-38	1.49e-43
H2afv	3.2e-51	-0.496089	0.988	0.997	6.14e-47	6.75e-47	-0.517037	0.984	0.996	1.29e-42	6.75e-47	6.4e-51
Ran	1.85e-53	-0.509313	0.988	1	3.54e-49	5.93e-55	-0.517236	0.996	1	1.14e-50	1.85e-53	1.19e-54
Dbi	5.35e-35	-0.432962	0.862	0.982	1.02e-30	7.26e-42	-0.519849	0.822	0.973	1.39e-37	5.35e-35	1.45e-41
Clec18a	8.23e-35	-0.559235	0.061	0.509	1.58e-30	6.53e-38	-0.528166	0.045	0.522	1.25e-33	8.23e-35	1.31e-37
Mafb	7.19e-13	-0.57033	0.158	0.415	1.38e-08	1.26e-07	-0.530451	0.223	0.402	0.00241083	1.26e-07	1.44e-12
Hmgn2	3.42e-41	-0.456749	0.984	0.997	6.55e-37	6.09e-46	-0.532543	0.964	0.985	1.17e-41	3.42e-41	1.22e-45
Atad2	5.48e-31	-0.470631	0.352	0.763	1.05e-26	8.89e-40	-0.543613	0.215	0.711	1.71e-35	5.48e-31	1.78e-39
Fbxo5	5.93e-42	-0.536157	0.134	0.629	1.14e-37	3.64e-42	-0.544366	0.097	0.593	6.98e-38	5.93e-42	7.28e-42
Osr2	4.62e-23	-0.445708	0.057	0.392	8.87e-19	2.16e-29	-0.546082	0.045	0.438	4.15e-25	4.62e-23	4.33e-29
Ldhb	1.44e-29	-0.481331	0.907	0.982	2.75e-25	4.36e-32	-0.546107	0.862	0.982	8.36e-28	1.44e-29	8.72e-32
Racgap1	1.03e-44	-0.505255	0.117	0.648	1.98e-40	8.15e-50	-0.546667	0.077	0.634	1.56e-45	1.03e-44	1.63e-49
Eva1a	2.98e-37	-0.452838	0.057	0.529	5.71e-33	5e-45	-0.547194	0.045	0.577	9.58e-41	2.98e-37	9.99e-45
S100a6	2.97e-14	-0.320417	0.142	0.401	5.69e-10	2.18e-09	-0.55761	0.166	0.38	4.17e-05	2.18e-09	5.93e-14
Pbk	1.52e-58	-0.557235	0.036	0.673	2.92e-54	1.82e-51	-0.56088	0.057	0.629	3.48e-47	1.82e-51	3.04e-58
Calm1	4.25e-44	-0.432345	0.972	0.993	8.16e-40	1.14e-49	-0.561809	0.947	0.992	2.19e-45	4.25e-44	2.29e-49
Cdca3	6.08e-46	-0.550984	0.19	0.723	1.17e-41	1.03e-47	-0.564792	0.13	0.682	1.98e-43	6.08e-46	2.06e-47
Id1	5.1e-25	-0.567369	0.453	0.78	9.78e-21	1.3e-28	-0.564993	0.449	0.825	2.49e-24	5.1e-25	2.6e-28
Lig1	1.24e-32	-0.507321	0.421	0.808	2.38e-28	3.92e-35	-0.57133	0.409	0.776	7.51e-31	1.24e-32	7.83e-35
Pdgfa	1.04e-19	-0.465728	0.676	0.864	2e-15	1.79e-22	-0.572312	0.599	0.878	3.44e-18	1.04e-19	3.59e-22
Anxa2	1.07e-13	-0.471416	0.417	0.653	2.06e-09	2.36e-20	-0.57803	0.336	0.657	4.52e-16	1.07e-13	4.71e-20
Hmmr	8.22e-46	-0.5912	0.032	0.572	1.58e-41	9.28e-42	-0.583909	0.045	0.548	1.78e-37	9.28e-42	1.64e-45
H1fx	2.7e-44	-0.646313	0.866	0.986	5.18e-40	1.54e-33	-0.585992	0.785	0.965	2.95e-29	1.54e-33	5.4e-44
Arl4c	2.73e-26	-0.444318	0.206	0.591	5.22e-22	1.66e-38	-0.58627	0.182	0.659	3.19e-34	2.73e-26	3.33e-38
Hsp90b1	2.18e-48	-0.636259	0.968	0.997	4.18e-44	1.53e-47	-0.589157	0.98	0.995	2.93e-43	1.53e-47	4.36e-48
Lamb1	1.24e-46	-0.532599	0.251	0.775	2.38e-42	1.02e-50	-0.590251	0.287	0.819	1.95e-46	1.24e-46	2.03e-50
Sfrp2	1.71e-16	-0.620169	0.49	0.712	3.28e-12	9.94e-22	-0.598249	0.409	0.722	1.91e-17	1.71e-16	1.99e-21
Nucks1	3.01e-54	-0.60716	0.931	0.992	5.76e-50	3.91e-47	-0.600921	0.899	0.98	7.49e-43	3.91e-47	6.01e-54
Cdh6	6.7e-27	-0.417889	0.085	0.48	1.28e-22	5.76e-46	-0.60202	0.061	0.603	1.1e-41	6.7e-27	1.15e-45
Col1a1	4.06e-12	-0.846286	0.401	0.651	7.79e-08	9.17e-08	-0.606482	0.267	0.456	0.00175858	9.17e-08	8.12e-12
Lmnb1	1.27e-46	-0.567324	0.838	0.969	2.43e-42	3.33e-46	-0.607136	0.725	0.95	6.39e-42	3.33e-46	2.54e-46
Penk	2.49e-09	-0.687868	0.198	0.404	4.78e-05	4.35e-12	-0.612935	0.117	0.348	8.34e-08	2.49e-09	8.7e-12
Spc25	1.38e-40	-0.597587	0.332	0.759	2.64e-36	1.67e-37	-0.614244	0.344	0.734	3.21e-33	1.67e-37	2.75e-40
S100a10	7.75e-23	-0.481077	0.518	0.806	1.49e-18	4.41e-33	-0.618098	0.522	0.837	8.46e-29	7.75e-23	8.82e-33
Cks1b	3.12e-53	-0.621019	0.81	0.963	5.98e-49	4.83e-50	-0.619102	0.737	0.956	9.27e-46	4.83e-50	6.24e-53
Rab3ip	1.94e-16	-0.391061	0.356	0.647	3.71e-12	1.11e-34	-0.621983	0.287	0.717	2.13e-30	1.94e-16	2.22e-34
H19	2.15e-34	-0.69269	0.789	0.956	4.13e-30	2.72e-17	-0.621987	0.7	0.84	5.22e-13	2.72e-17	4.3e-34
Ccna2	1.78e-56	-0.612265	0.097	0.701	3.42e-52	9.37e-52	-0.626933	0.073	0.645	1.8e-47	9.37e-52	3.57e-56
Tuba1a	1.48e-31	-0.615164	0.895	0.955	2.84e-27	3.18e-27	-0.628198	0.777	0.927	6.09e-23	3.18e-27	2.96e-31
Hmgb1	6.19e-62	-0.543316	1	1	1.19e-57	1.4e-66	-0.632309	1	1	2.68e-62	6.19e-62	2.8e-66
Dek	7.48e-61	-0.639698	0.947	0.995	1.43e-56	4.28e-51	-0.633284	0.951	0.995	8.2e-47	4.28e-51	1.5e-60
Emid1	3.69e-39	-0.697457	0.231	0.693	7.07e-35	1.04e-42	-0.634693	0.174	0.679	1.99e-38	3.69e-39	2.07e-42
Col3a1	5.47e-09	-0.848719	0.393	0.577	0.00010484	2.56e-08	-0.644162	0.243	0.425	0.000491069	2.56e-08	1.09e-08
Tpm1	7.98e-17	-0.488461	0.806	0.933	1.53e-12	2.49e-22	-0.664505	0.761	0.926	4.78e-18	7.98e-17	4.98e-22
Mpc2	1.28e-09	-0.270473	0.81	0.926	2.46e-05	1.07e-21	-0.665583	0.798	0.921	2.05e-17	1.28e-09	2.14e-21
Atp1b1	1.18e-10	-0.267527	0.219	0.465	2.26e-06	1.6e-24	-0.672678	0.215	0.595	3.06e-20	1.18e-10	3.19e-24
Tyms	7.64e-43	-0.65058	0.526	0.85	1.46e-38	7.96e-50	-0.675451	0.389	0.819	1.53e-45	7.64e-43	1.59e-49
Arl6ip1	6.71e-20	-0.640874	0.7	0.895	1.29e-15	1.12e-16	-0.676134	0.785	0.894	2.15e-12	1.12e-16	1.34e-19
Ccnb1	3.07e-43	-0.680703	0.109	0.623	5.88e-39	1.46e-42	-0.677448	0.077	0.588	2.8e-38	1.46e-42	6.13e-43
Gmnn	4.44e-54	-0.628471	0.279	0.798	8.51e-50	2.25e-65	-0.686373	0.15	0.785	4.32e-61	4.44e-54	4.51e-65
Ccnb2	4.5e-42	-0.638441	0.215	0.715	8.63e-38	2.07e-40	-0.687709	0.174	0.665	3.97e-36	2.07e-40	9.01e-42
Rrm2	4.21e-54	-0.714431	0.146	0.735	8.07e-50	3.18e-58	-0.691147	0.045	0.671	6.1e-54	4.21e-54	6.37e-58
Cenpe	1.7e-46	-0.711385	0.206	0.748	3.27e-42	1.49e-39	-0.701398	0.166	0.656	2.85e-35	1.49e-39	3.41e-46
Prc1	2.91e-45	-0.732936	0.073	0.603	5.58e-41	7.99e-46	-0.708624	0.061	0.594	1.53e-41	2.91e-45	1.6e-45
Hist1h1e	8.21e-29	-0.681225	0.603	0.866	1.57e-24	8.64e-28	-0.709811	0.632	0.853	1.66e-23	8.64e-28	1.64e-28
Stmn1	1.35e-52	-0.62481	1	1	2.59e-48	1.08e-56	-0.713542	0.992	0.999	2.07e-52	1.35e-52	2.16e-56
Tagln	1.17e-07	-0.50794	0.166	0.341	0.00224161	3.67e-10	-0.73045	0.17	0.393	7.03e-06	1.17e-07	7.34e-10
Pax8	6.12e-37	-0.767209	0.32	0.738	1.17e-32	1.56e-40	-0.733501	0.316	0.752	2.99e-36	6.12e-37	3.12e-40
Cdc20	5.16e-40	-0.790682	0.202	0.682	9.9e-36	3.83e-43	-0.740838	0.158	0.671	7.35e-39	5.16e-40	7.66e-43
Ptn	3.43e-32	-0.693308	0.822	0.95	6.57e-28	1.37e-30	-0.752045	0.781	0.924	2.63e-26	1.37e-30	6.86e-32
Tpx2	5.83e-49	-0.714851	0.154	0.69	1.12e-44	2.55e-51	-0.755524	0.101	0.658	4.89e-47	5.83e-49	5.1e-51
Ube2s	4.58e-47	-0.715583	0.96	0.992	8.78e-43	1.64e-46	-0.766072	0.943	0.985	3.14e-42	1.64e-46	9.16e-47
Col1a2	2.66e-08	-0.904744	0.514	0.685	0.000510402	5.37e-07	-0.766406	0.308	0.48	0.0103027	5.37e-07	5.32e-08
Tuba1b	1.37e-56	-0.692671	0.98	0.993	2.62e-52	1.31e-62	-0.793399	0.976	0.996	2.52e-58	1.37e-56	2.63e-62
Nasp	2.32e-40	-0.621339	0.931	0.992	4.44e-36	4.17e-58	-0.797462	0.794	0.972	7.99e-54	2.32e-40	8.33e-58
Epcam	4.14e-09	-0.362299	0.279	0.52	7.94e-05	4.61e-24	-0.806879	0.17	0.538	8.84e-20	4.14e-09	9.22e-24
Cldn5	7.83e-24	-0.828166	0.093	0.445	1.5e-19	1.54e-22	-0.807671	0.081	0.412	2.95e-18	1.54e-22	1.57e-23
Spc24	4.09e-70	-0.808659	0.247	0.832	7.84e-66	7.18e-66	-0.812822	0.166	0.784	1.38e-61	7.18e-66	8.18e-70
Cenpa	4.35e-53	-0.898378	0.174	0.742	8.34e-49	9.85e-42	-0.815838	0.202	0.69	1.89e-37	9.85e-42	8.7e-53
Wfdc2	8.18e-25	-0.711278	0.486	0.84	1.57e-20	1.79e-23	-0.820725	0.401	0.748	3.44e-19	1.79e-23	1.64e-24
Nusap1	1.35e-44	-0.80786	0.121	0.632	2.58e-40	9.64e-45	-0.848354	0.089	0.606	1.85e-40	1.35e-44	1.93e-44
Cdk1	1.25e-60	-0.886354	0.271	0.816	2.4e-56	9.31e-52	-0.856916	0.255	0.759	1.79e-47	9.31e-52	2.5e-60
Clu	1.81e-27	-0.761902	0.178	0.559	3.46e-23	1.29e-28	-0.867285	0.247	0.624	2.46e-24	1.81e-27	2.57e-28
Smc2	4.24e-65	-0.841845	0.397	0.874	8.13e-61	2.35e-58	-0.872156	0.356	0.821	4.51e-54	2.35e-58	8.48e-65
Cdca8	7.73e-63	-0.884802	0.202	0.787	1.48e-58	3.58e-58	-0.879075	0.158	0.734	6.86e-54	3.58e-58	1.55e-62
Acta2	3.52e-07	-0.878363	0.526	0.722	0.00674738	2.11e-05	-0.911612	0.47	0.624	0.405484	2.11e-05	7.04e-07
Smc4	2.18e-59	-0.861594	0.563	0.903	4.18e-55	2.61e-55	-0.931567	0.49	0.878	5e-51	2.61e-55	4.36e-59
Csrp2	1.26e-60	-0.845517	0.583	0.941	2.41e-56	3.66e-56	-0.932921	0.551	0.918	7.01e-52	3.66e-56	2.51e-60
H2afz	5.61e-81	-0.92679	1	1	1.08e-76	5.79e-82	-0.945874	1	1	1.11e-77	5.61e-81	1.16e-81
Cks2	1.44e-43	-0.886409	0.53	0.835	2.76e-39	8.24e-56	-0.949445	0.377	0.846	1.58e-51	1.44e-43	1.65e-55
H2afx	7.23e-54	-0.993653	0.684	0.939	1.39e-49	1.27e-47	-0.980532	0.64	0.908	2.44e-43	1.27e-47	1.45e-53
Wnt4	9.89e-49	-1.1263	0.154	0.685	1.9e-44	3.67e-39	-1.018	0.178	0.649	7.04e-35	3.67e-39	1.98e-48
Birc5	1.6e-65	-1.03842	0.231	0.808	3.08e-61	5.11e-63	-1.03576	0.182	0.767	9.8e-59	5.11e-63	3.21e-65
Mki67	6.81e-58	-1.02472	0.215	0.776	1.3e-53	1.22e-56	-1.04831	0.142	0.722	2.34e-52	1.22e-56	1.36e-57
Tmsb4x	2.49e-08	-1.18717	0.955	0.98	0.000477043	0.000335627	-1.05445	0.972	0.962	1	0.000335627	4.98e-08
Hist1h2ae	3.75e-43	-1.30187	0.421	0.816	7.2e-39	1.44e-36	-1.08771	0.381	0.752	2.76e-32	1.44e-36	7.51e-43
Igfbp7	7.27e-32	-0.871509	0.352	0.709	1.39e-27	2.53e-45	-1.16088	0.385	0.796	4.86e-41	7.27e-32	5.06e-45
Tubb4b	4.59e-64	-1.18829	0.672	0.947	8.8e-60	2.57e-60	-1.19931	0.591	0.922	4.92e-56	2.57e-60	9.17e-64
Cenpf	3.94e-59	-1.17591	0.186	0.782	7.55e-55	2.46e-53	-1.22255	0.158	0.718	4.73e-49	2.46e-53	7.87e-59
Ube2c	3.36e-34	-1.18202	0.417	0.791	6.44e-30	5.16e-39	-1.2556	0.34	0.77	9.9e-35	3.36e-34	1.03e-38
Lhx1	3.83e-38	-1.33342	0.053	0.521	7.34e-34	5.01e-47	-1.34454	0.061	0.597	9.6e-43	3.83e-38	1e-46
Pclaf	1.54e-74	-1.32713	0.336	0.881	2.95e-70	3.83e-81	-1.40574	0.211	0.855	7.35e-77	1.54e-74	7.66e-81
Hist1h1b	2.23e-48	-1.44125	0.372	0.802	4.27e-44	4.1e-48	-1.41054	0.316	0.782	7.86e-44	4.1e-48	4.45e-48
Top2a	1.43e-58	-1.36188	0.279	0.801	2.74e-54	2.68e-59	-1.4151	0.247	0.778	5.13e-55	1.43e-58	5.35e-59
Ccnd1	6.2e-28	-1.4108	0.563	0.824	1.19e-23	8.69e-42	-1.50388	0.453	0.826	1.67e-37	6.2e-28	1.74e-41
Hmgb2	4.46e-75	-1.55119	0.903	0.992	8.56e-71	2.07e-81	-1.65033	0.895	0.988	3.98e-77	4.46e-75	4.15e-81
Hist1h2ap	3.09e-54	-1.99431	0.773	0.965	5.92e-50	4.64e-60	-1.81358	0.498	0.896	8.89e-56	3.09e-54	9.28e-60

## Sheet: Tubule_progenitors.1.marker
Gene	Mutant_p_val	Mutant_avg_logFC	Mutant_pct.1	Mutant_pct.2	Mutant_p_val_adj	CTRL_p_val	CTRL_avg_logFC	CTRL_pct.1	CTRL_pct.2	CTRL_p_val_adj	max_pval	minimump_p_val
Tmsb4x	1.78e-83	2.14371	1	0.968	3.41e-79	7.5e-70	2.11333	1	0.959	1.44e-65	7.5e-70	3.56e-83
Col1a2	1.1e-96	1.98701	1	0.565	2.11e-92	3.59e-92	1.97238	1	0.353	6.88e-88	3.59e-92	2.2e-96
Col3a1	1.13e-103	1.87748	1	0.43	2.16e-99	6.28e-98	1.75739	1	0.287	1.2e-93	6.28e-98	2.25e-103
Col1a1	3.04e-98	1.83958	1	0.499	5.82e-94	5.03e-88	1.70798	0.985	0.323	9.64e-84	5.03e-88	6.07e-98
Acta2	1.07e-55	1.81944	0.936	0.616	2.06e-51	1.28e-62	2.1278	0.978	0.527	2.46e-58	1.07e-55	2.57e-62
Cdkn1c	2.15e-61	1.76276	1	0.928	4.13e-57	8.06e-46	1.58506	1	0.895	1.55e-41	8.06e-46	4.31e-61
Penk	5.86e-77	1.63651	0.844	0.247	1.12e-72	7.09e-82	1.66684	0.882	0.203	1.36e-77	5.86e-77	1.42e-81
Lgals1	2.06e-89	1.49278	1	0.672	3.96e-85	2.23e-70	1.38727	0.993	0.59	4.28e-66	2.23e-70	4.13e-89
Meg3	1.64e-85	1.46922	0.919	0.311	3.14e-81	9.53e-96	1.2984	0.934	0.188	1.83e-91	1.64e-85	1.91e-95
Dcn	2.51e-46	1.40222	0.78	0.333	4.81e-42	5.68e-56	1.27506	0.721	0.169	1.09e-51	2.51e-46	1.14e-55
Myl9	6.22e-78	1.22865	0.954	0.423	1.19e-73	5.44e-68	1.30348	0.941	0.357	1.04e-63	5.44e-68	1.24e-77
Fn1	1.62e-80	1.19345	0.965	0.435	3.1e-76	1.73e-73	1.0573	0.963	0.353	3.31e-69	1.73e-73	3.23e-80
Tagln	1.06e-58	1.18391	0.746	0.201	2.02e-54	1.27e-45	1.57486	0.787	0.271	2.44e-41	1.27e-45	2.11e-58
Vim	3.75e-73	1.16422	1	0.87	7.19e-69	2.69e-50	0.859837	1	0.851	5.16e-46	2.69e-50	7.5e-73
Cfh	2.05e-119	1.11278	0.931	0.152	3.93e-115	1.39e-118	1.20104	0.971	0.147	2.66e-114	1.39e-118	4.1e-119
Sfrp1	1.91e-83	1.05776	0.942	0.356	3.66e-79	4.37e-83	1.01734	0.941	0.267	8.38e-79	4.37e-83	3.81e-83
Zeb2	5.73e-60	1.04345	0.942	0.544	1.1e-55	9.46e-61	1.01576	0.971	0.561	1.81e-56	5.73e-60	1.89e-60
Bgn	1.9e-102	1.01721	0.942	0.227	3.64e-98	8.23e-102	0.949193	0.963	0.191	1.58e-97	8.23e-102	3.79e-102
Maged2	1.03e-77	1.00946	1	0.871	1.97e-73	1.49e-61	0.873027	1	0.832	2.86e-57	1.49e-61	2.06e-77
Cnn2	2.34e-79	1.00172	0.96	0.442	4.49e-75	6.26e-76	1.03247	1	0.379	1.2e-71	6.26e-76	4.68e-79
Anxa2	1.37e-80	0.968535	0.977	0.512	2.63e-76	1.45e-48	0.661043	0.993	0.517	2.78e-44	1.45e-48	2.74e-80
Ptn	2.12e-40	0.940975	0.994	0.901	4.07e-36	6.42e-24	0.83141	0.985	0.876	1.23e-19	6.42e-24	4.25e-40
Cald1	2.82e-72	0.927362	0.994	0.825	5.41e-68	5.17e-67	1.03665	1	0.706	9.9e-63	5.17e-67	5.64e-72
Basp1	4.65e-58	0.895108	0.988	0.792	8.91e-54	6.63e-37	0.68438	0.993	0.732	1.27e-32	6.63e-37	9.29e-58
Gucy1a1	4.85e-88	0.875892	0.919	0.248	9.3e-84	2.43e-90	1.09715	0.971	0.252	4.66e-86	4.85e-88	4.86e-90
Dlk1	1.37e-22	0.861096	0.561	0.214	2.62e-18	1.15e-14	0.337182	0.324	0.091	2.21e-10	1.15e-14	2.74e-22
S100a6	5.63e-94	0.834964	0.913	0.212	1.08e-89	2.37e-65	0.398	0.897	0.242	4.54e-61	2.37e-65	1.13e-93
Nts	3.96e-30	0.811382	0.306	0.042	7.59e-26	4.42e-40	0.869034	0.346	0.033	8.47e-36	3.96e-30	8.84e-40
Igfbp7	8.63e-46	0.802796	0.965	0.545	1.65e-41	4.3e-20	0.254171	1	0.651	8.24e-16	4.3e-20	1.73e-45
Mgp	9.6e-26	0.76986	0.827	0.43	1.84e-21	2.27e-21	0.781998	0.779	0.38	4.35e-17	2.27e-21	1.92e-25
Emilin1	2.38e-84	0.762243	0.96	0.331	4.56e-80	8.84e-85	0.766675	0.956	0.232	1.7e-80	2.38e-84	1.77e-84
Col6a2	1.2e-87	0.759169	0.861	0.176	2.3e-83	3.55e-99	0.675492	0.853	0.107	6.81e-95	1.2e-87	7.1e-99
Selenom	1.79e-75	0.755585	0.983	0.482	3.44e-71	3.41e-61	0.749863	0.978	0.447	6.54e-57	3.41e-61	3.58e-75
S100a10	1.4e-49	0.74364	0.965	0.684	2.69e-45	7.92e-34	0.634936	0.985	0.728	1.52e-29	7.92e-34	2.8e-49
Emp3	5.85e-65	0.741503	1	0.581	1.12e-60	5.13e-47	0.632329	0.993	0.557	9.84e-43	5.13e-47	1.17e-64
Ifitm3	1.86e-77	0.733901	0.965	0.393	3.57e-73	7.1e-65	0.783162	0.963	0.354	1.36e-60	7.1e-65	3.73e-77
Mylk	1.68e-56	0.731008	0.936	0.471	3.23e-52	1.49e-57	0.799215	0.941	0.4	2.87e-53	1.68e-56	2.99e-57
Olfml3	7.29e-112	0.729965	0.873	0.119	1.4e-107	5.67e-99	0.703171	0.846	0.109	1.09e-94	5.67e-99	1.46e-111
Pdgfra	2.18e-137	0.729484	0.919	0.082	4.18e-133	8.62e-110	0.572016	0.801	0.067	1.65e-105	8.62e-110	4.36e-137
Col6a1	2.83e-101	0.727045	0.896	0.16	5.42e-97	8.85e-106	0.693082	0.838	0.09	1.7e-101	2.83e-101	1.77e-105
Pbx1	1.85e-57	0.718514	1	0.914	3.55e-53	2.47e-48	0.708666	1	0.885	4.73e-44	2.47e-48	3.7e-57
Tpm1	1.71e-32	0.709737	0.983	0.884	3.28e-28	8.07e-36	0.726084	0.993	0.87	1.55e-31	1.71e-32	1.61e-35
Eva1b	1.06e-63	0.696939	0.994	0.678	2.04e-59	2.66e-51	0.699637	0.985	0.652	5.1e-47	2.66e-51	2.13e-63
Atp2b1	3.28e-31	0.69388	0.983	0.84	6.29e-27	3.21e-29	0.638096	0.993	0.795	6.16e-25	3.21e-29	6.56e-31
Fbln1	6.14e-48	0.666808	0.983	0.658	1.18e-43	3.82e-40	0.644397	0.963	0.639	7.32e-36	3.82e-40	1.23e-47
Alcam	1.79e-41	0.663807	0.983	0.714	3.44e-37	2.27e-29	0.576147	0.978	0.645	4.35e-25	2.27e-29	3.58e-41
Gsn	2.11e-58	0.659329	0.971	0.393	4.04e-54	8.25e-36	0.401572	0.904	0.371	1.58e-31	8.25e-36	4.22e-58
Akap12	8.08e-43	0.65492	0.948	0.525	1.55e-38	2.83e-42	0.58541	0.993	0.527	5.42e-38	2.83e-42	1.62e-42
Pdlim2	4.07e-78	0.654264	0.925	0.289	7.81e-74	7.75e-81	0.650825	0.963	0.233	1.49e-76	4.07e-78	1.55e-80
Flna	3.21e-54	0.631238	0.977	0.737	6.15e-50	1.23e-49	0.652926	1	0.687	2.36e-45	1.23e-49	6.42e-54
Nfix	5.93e-86	0.628959	0.913	0.23	1.14e-81	8.31e-72	0.598515	0.934	0.25	1.59e-67	8.31e-72	1.19e-85
Timp3	2.39e-60	0.619768	0.838	0.254	4.58e-56	9.1e-62	0.704244	0.912	0.276	1.75e-57	2.39e-60	1.82e-61
Col15a1	1.9e-60	0.606424	0.578	0.086	3.63e-56	5.69e-67	0.583985	0.669	0.101	1.09e-62	1.9e-60	1.14e-66
Col14a1	1.86e-88	0.603829	0.705	0.076	3.57e-84	1.2e-71	0.484413	0.544	0.043	2.31e-67	1.2e-71	3.73e-88
Pcolce	6.13e-77	0.598801	0.884	0.255	1.17e-72	6e-67	0.615887	0.875	0.228	1.15e-62	6e-67	1.23e-76
Csrp1	2.02e-49	0.593472	0.89	0.442	3.87e-45	1.13e-52	0.669516	0.941	0.443	2.17e-48	2.02e-49	2.26e-52
Ifitm1	1.02e-61	0.585734	0.954	0.359	1.95e-57	7.47e-61	0.641648	0.949	0.293	1.43e-56	7.47e-61	2.04e-61
Gas6	1.21e-68	0.583301	0.624	0.083	2.33e-64	1.52e-68	0.592405	0.618	0.073	2.9e-64	1.52e-68	2.43e-68
Lbh	1.48e-77	0.576896	0.873	0.214	2.85e-73	2.97e-79	0.547781	0.904	0.187	5.69e-75	1.48e-77	5.93e-79
Ccnd2	2.65e-33	0.575827	0.994	0.799	5.09e-29	3.06e-22	0.515477	0.985	0.737	5.86e-18	3.06e-22	5.31e-33
Plac8	3.11e-71	0.57295	0.751	0.14	5.96e-67	9.5e-65	0.703147	0.794	0.174	1.82e-60	9.5e-65	6.21e-71
Ecm1	2.1e-83	0.569665	0.705	0.089	4.02e-79	4.97e-83	0.646816	0.75	0.095	9.52e-79	4.97e-83	4.2e-83
Palld	5.54e-30	0.567046	0.89	0.527	1.06e-25	1.04e-30	0.638754	0.912	0.543	1.99e-26	5.54e-30	2.07e-30
Col5a2	4.12e-104	0.56348	0.855	0.119	7.9e-100	1.52e-92	0.443697	0.816	0.096	2.92e-88	1.52e-92	8.24e-104
Sparc	6.71e-30	0.561728	1	0.986	1.29e-25	1.58e-29	0.565958	1	0.956	3.03e-25	1.58e-29	1.34e-29
Rarres2	1.13e-90	0.553904	0.85	0.151	2.16e-86	1.53e-84	0.65173	0.853	0.145	2.94e-80	1.53e-84	2.26e-90
Tgfb1i1	1.96e-86	0.552166	0.85	0.176	3.77e-82	3.21e-80	0.471884	0.838	0.136	6.15e-76	3.21e-80	3.93e-86
Tcf21	2.59e-52	0.547907	0.896	0.399	4.97e-48	3.54e-61	0.754874	0.956	0.344	6.79e-57	2.59e-52	7.08e-61
Cd81	7.65e-62	0.540938	1	0.965	1.47e-57	2.71e-35	0.464702	1	0.956	5.19e-31	2.71e-35	1.53e-61
Lhfp	2.79e-53	0.534627	0.931	0.435	5.35e-49	6.23e-50	0.56357	0.919	0.367	1.19e-45	6.23e-50	5.58e-53
Fbln5	1.31e-93	0.532347	0.775	0.098	2.52e-89	7.46e-113	0.629709	0.824	0.07	1.43e-108	1.31e-93	1.49e-112
Ebf1	1.14e-69	0.531168	0.728	0.14	2.19e-65	1.28e-84	0.585337	0.772	0.098	2.45e-80	1.14e-69	2.56e-84
Anxa5	2.1e-52	0.527385	1	0.758	4.02e-48	4.15e-23	0.355128	0.978	0.717	7.96e-19	4.15e-23	4.2e-52
Mfap2	1.08e-45	0.526835	1	0.782	2.07e-41	1.2e-37	0.496972	0.993	0.679	2.3e-33	1.2e-37	2.16e-45
Serpine2	2.15e-59	0.526152	0.85	0.296	4.13e-55	1.27e-51	0.510356	0.809	0.23	2.43e-47	1.27e-51	4.31e-59
Ccdc80	3.42e-58	0.521732	0.925	0.342	6.57e-54	7.27e-51	0.601484	0.904	0.337	1.39e-46	7.27e-51	6.85e-58
Gpc3	2.75e-35	0.521482	0.994	0.969	5.28e-31	3.63e-22	0.418462	1	0.972	6.97e-18	3.63e-22	5.51e-35
Arl4a	6.84e-35	0.520718	0.792	0.359	1.31e-30	1.39e-26	0.409267	0.831	0.388	2.67e-22	1.39e-26	1.37e-34
Actb	6.83e-52	0.502238	1	1	1.31e-47	4.76e-50	0.568504	1	1	9.13e-46	4.76e-50	1.37e-51
Cdh11	2.82e-30	0.502165	0.983	0.757	5.41e-26	9.84e-30	0.494313	0.993	0.652	1.89e-25	9.84e-30	5.64e-30
Col4a1	9.21e-23	0.499431	0.994	0.918	1.77e-18	1.68e-19	0.434361	0.993	0.88	3.22e-15	1.68e-19	1.84e-22
Tagln2	3.54e-44	0.498791	0.908	0.46	6.79e-40	7.89e-27	0.372889	0.882	0.446	1.51e-22	7.89e-27	7.09e-44
Ldb2	8.96e-109	0.49231	0.798	0.077	1.72e-104	1.21e-91	0.417318	0.743	0.073	2.32e-87	1.21e-91	1.79e-108
Arpc1b	1.08e-44	0.492303	0.977	0.721	2.07e-40	5.1e-23	0.383715	0.919	0.629	9.78e-19	5.1e-23	2.16e-44
Marcks	3.13e-44	0.491052	1	0.97	6e-40	1.03e-31	0.481017	1	0.937	1.98e-27	1.03e-31	6.25e-44
Lum	1.52e-30	0.488895	0.422	0.092	2.92e-26	1.71e-32	0.360652	0.346	0.046	3.27e-28	1.52e-30	3.41e-32
Myl6	2.64e-53	0.484725	1	1	5.06e-49	6e-44	0.568585	1	0.998	1.15e-39	6e-44	5.28e-53
Snai2	2.71e-55	0.484363	0.815	0.235	5.2e-51	4.59e-47	0.484693	0.838	0.252	8.8e-43	4.59e-47	5.42e-55
Mfap4	4.58e-26	0.483739	0.96	0.678	8.78e-22	1.34e-23	0.473843	0.934	0.552	2.57e-19	1.34e-23	9.15e-26
Epb41l2	6.38e-39	0.480916	0.867	0.393	1.22e-34	1.8e-39	0.495172	0.86	0.354	3.45e-35	6.38e-39	3.59e-39
Tpm4	2.44e-40	0.480754	0.994	0.893	4.68e-36	6.78e-34	0.476585	1	0.888	1.3e-29	6.78e-34	4.88e-40
Snhg18	1.04e-34	0.471601	0.902	0.551	2e-30	1.59e-23	0.412336	0.912	0.61	3.05e-19	1.59e-23	2.09e-34
Nid1	7.43e-63	0.469666	0.879	0.258	1.42e-58	5.88e-52	0.45238	0.86	0.242	1.13e-47	5.88e-52	1.49e-62
Pfn2	1.94e-13	0.467947	0.89	0.679	3.72e-09	3.94e-16	0.539981	0.868	0.585	7.56e-12	1.94e-13	7.88e-16
Plagl1	4.21e-51	0.467644	0.792	0.245	8.07e-47	1.31e-21	0.314164	0.618	0.228	2.52e-17	1.31e-21	8.42e-51
G0s2	3.27e-65	0.464656	0.763	0.176	6.27e-61	2.78e-67	0.731357	0.846	0.203	5.33e-63	3.27e-65	5.55e-67
Meis1	1.27e-48	0.464608	0.925	0.445	2.44e-44	3.23e-34	0.357023	0.919	0.43	6.2e-30	3.23e-34	2.54e-48
Hsp90b1	1.93e-17	0.45978	1	0.988	3.7e-13	7.3e-11	0.317258	1	0.99	1.4e-06	7.3e-11	3.86e-17
Nfia	7.7e-102	0.451154	0.838	0.105	1.48e-97	1.49e-82	0.392221	0.831	0.124	2.85e-78	1.49e-82	1.54e-101
Anxa6	5.77e-51	0.447524	0.988	0.58	1.11e-46	1.54e-44	0.450978	0.912	0.395	2.95e-40	1.54e-44	1.15e-50
Ogn	1.29e-102	0.443644	0.676	0.04	2.48e-98	1.97e-79	0.464095	0.64	0.059	3.79e-75	1.97e-79	2.59e-102
Rasgrp2	1.09e-56	0.438647	0.838	0.268	2.08e-52	9.35e-46	0.412464	0.809	0.239	1.79e-41	9.35e-46	2.17e-56
Serping1	3.2e-76	0.437677	0.827	0.176	6.14e-72	8.4e-78	0.522013	0.882	0.173	1.61e-73	3.2e-76	1.68e-77
Lsp1	2.87e-25	0.437572	1	0.901	5.5e-21	1.62e-24	0.445546	1	0.825	3.1e-20	1.62e-24	5.73e-25
Nexn	2.05e-39	0.431705	0.636	0.187	3.93e-35	1.43e-55	0.618238	0.794	0.198	2.74e-51	2.05e-39	2.86e-55
Nfat5	3.89e-24	0.431376	0.902	0.581	7.46e-20	6.53e-18	0.337504	0.912	0.591	1.25e-13	6.53e-18	7.78e-24
Hic1	3.53e-80	0.430827	0.734	0.11	6.78e-76	1.6e-94	0.372193	0.721	0.058	3.07e-90	3.53e-80	3.2e-94
Sdc2	8.6e-32	0.427973	0.873	0.437	1.65e-27	2.4e-37	0.513873	0.875	0.396	4.6e-33	8.6e-32	4.79e-37
Postn	1.63e-39	0.41938	0.428	0.066	3.13e-35	6.85e-33	0.412207	0.36	0.048	1.31e-28	6.85e-33	3.27e-39
Alx1	8.2e-86	0.418832	0.607	0.042	1.57e-81	7.9e-95	0.415676	0.618	0.031	1.51e-90	8.2e-86	1.58e-94
Sparcl1	1.75e-47	0.417295	0.705	0.188	3.36e-43	1.46e-38	0.262271	0.588	0.129	2.79e-34	1.46e-38	3.51e-47
Rrbp1	8.02e-30	0.416582	0.994	0.933	1.54e-25	5.96e-18	0.30596	1	0.909	1.14e-13	5.96e-18	1.6e-29
Ifitm2	9.55e-41	0.413363	1	0.98	1.83e-36	1.9e-25	0.385989	1	0.961	3.64e-21	1.9e-25	1.91e-40
Ahnak	6.14e-69	0.410387	0.757	0.149	1.18e-64	2.31e-78	0.436818	0.838	0.139	4.44e-74	6.14e-69	4.63e-78
Col5a1	2.27e-71	0.40291	0.763	0.15	4.34e-67	1.12e-55	0.325997	0.662	0.118	2.14e-51	1.12e-55	4.53e-71
Efemp2	8.98e-41	0.401091	0.971	0.592	1.72e-36	5.82e-32	0.419493	0.963	0.572	1.12e-27	5.82e-32	1.8e-40
2022-09-07	4.15e-39	0.399847	1	0.962	7.96e-35	5.86e-26	0.389904	1	0.951	1.12e-21	5.86e-26	8.31e-39
Fbn1	2.79e-54	0.398209	0.844	0.279	5.35e-50	1.68e-49	0.378448	0.853	0.249	3.22e-45	1.68e-49	5.58e-54
Cldn11	1.16e-53	0.39573	0.468	0.052	2.22e-49	3.57e-69	0.521869	0.596	0.063	6.84e-65	1.16e-53	7.13e-69
Cdc42ep3	7.82e-42	0.393162	0.728	0.233	1.5e-37	5.11e-41	0.487437	0.75	0.226	9.8e-37	5.11e-41	1.56e-41
2022-09-11	1.1e-28	0.385195	0.994	0.818	2.11e-24	8.91e-21	0.330833	0.978	0.802	1.71e-16	8.91e-21	2.2e-28
Col6a3	3.56e-96	0.380113	0.751	0.077	6.82e-92	2.48e-79	0.348775	0.654	0.064	4.75e-75	2.48e-79	7.11e-96
Islr	5.06e-74	0.378468	0.786	0.144	9.71e-70	4.66e-63	0.331293	0.706	0.108	8.94e-59	4.66e-63	1.01e-73
Gng11	1.73e-55	0.375037	0.792	0.216	3.32e-51	5.43e-59	0.432625	0.801	0.176	1.04e-54	1.73e-55	1.09e-58
Fhl2	4.05e-36	0.374575	0.728	0.264	7.77e-32	3.82e-25	0.381336	0.728	0.306	7.33e-21	3.82e-25	8.1e-36
Ckb	4.09e-22	0.366804	0.85	0.496	7.83e-18	6.19e-22	0.445562	0.779	0.393	1.19e-17	6.19e-22	8.17e-22
Fermt2	7.74e-24	0.358637	0.965	0.757	1.48e-19	1.34e-17	0.314232	0.978	0.765	2.57e-13	1.34e-17	1.55e-23
Myh10	1.17e-23	0.358334	0.994	0.87	2.24e-19	1.3e-17	0.321462	0.985	0.837	2.49e-13	1.3e-17	2.33e-23
Zfp36l1	1.47e-25	0.355499	0.994	0.908	2.83e-21	6.94e-19	0.338981	1	0.898	1.33e-14	6.94e-19	2.95e-25
Itga9	7.15e-43	0.353933	0.838	0.326	1.37e-38	8.05e-39	0.311717	0.779	0.247	1.54e-34	8.05e-39	1.43e-42
Igfbp4	2.13e-26	0.353407	0.994	0.895	4.09e-22	1.9e-28	0.471577	1	0.8	3.64e-24	2.13e-26	3.8e-28
Fbxl7	6.13e-39	0.348588	0.792	0.312	1.18e-34	2.29e-27	0.26722	0.765	0.307	4.39e-23	2.29e-27	1.23e-38
Flrt2	1.66e-53	0.347709	0.74	0.181	3.19e-49	2.91e-52	0.447778	0.743	0.178	5.57e-48	2.91e-52	3.33e-53
Itm2b	7.16e-30	0.346853	1	0.99	1.37e-25	1.39e-19	0.317162	1	0.983	2.67e-15	1.39e-19	1.43e-29
Pla2g4a	2.37e-53	0.346817	0.705	0.172	4.54e-49	2.34e-47	0.418796	0.75	0.203	4.48e-43	2.34e-47	4.74e-53
Serpinh1	8.82e-33	0.346008	1	0.994	1.69e-28	2.77e-24	0.348633	1	0.982	5.32e-20	2.77e-24	1.76e-32
Rcn3	2.94e-27	0.344719	0.994	0.943	5.65e-23	5.21e-16	0.268832	0.993	0.844	9.98e-12	5.21e-16	5.89e-27
Fos	8.11e-13	0.343416	0.902	0.668	1.56e-08	1.21e-11	0.325983	0.941	0.712	2.32e-07	1.21e-11	1.62e-12
Matn2	1.72e-71	0.341116	0.642	0.077	3.29e-67	2.42e-73	0.298391	0.61	0.056	4.64e-69	1.72e-71	4.84e-73
Gpx8	3e-34	0.34071	0.96	0.664	5.75e-30	1.37e-24	0.322064	0.934	0.574	2.63e-20	1.37e-24	6e-34
Cebpd	1.15e-54	0.337785	0.613	0.113	2.2e-50	1.04e-43	0.277393	0.662	0.138	1.99e-39	1.04e-43	2.3e-54
Aebp1	2.07e-36	0.337531	0.803	0.332	3.96e-32	2.72e-44	0.370538	0.809	0.252	5.21e-40	2.07e-36	5.44e-44
Fzd1	5.5e-61	0.334447	0.757	0.167	1.05e-56	3.68e-50	0.339892	0.765	0.193	7.06e-46	3.68e-50	1.1e-60
Nav3	4.05e-63	0.331274	0.486	0.04	7.77e-59	7.04e-41	0.251821	0.456	0.067	1.35e-36	7.04e-41	8.11e-63
Colec12	3.85e-54	0.330876	0.798	0.209	7.39e-50	9.01e-48	0.347714	0.75	0.177	1.73e-43	9.01e-48	7.71e-54
Ace2	4.28e-40	0.329764	0.439	0.072	8.2e-36	1.7e-39	0.367738	0.463	0.075	3.27e-35	1.7e-39	8.55e-40
Cxcl12	2.74e-14	0.327482	0.728	0.425	5.26e-10	9.94e-22	0.30818	0.757	0.332	1.91e-17	2.74e-14	1.99e-21
S100a11	5.86e-25	0.325742	0.994	0.943	1.12e-20	1e-18	0.333922	1	0.926	1.93e-14	1e-18	1.17e-24
P3h3	1.73e-37	0.323621	0.861	0.378	3.31e-33	3.54e-22	0.26381	0.779	0.373	6.78e-18	3.54e-22	3.46e-37
Nr2f2	1.25e-21	0.323146	1	0.964	2.4e-17	8.29e-24	0.402599	0.993	0.938	1.59e-19	1.25e-21	1.66e-23
Col23a1	4.51e-47	0.322148	0.555	0.1	8.64e-43	1.95e-59	0.369805	0.581	0.07	3.74e-55	4.51e-47	3.9e-59
Hmcn1	7.43e-18	0.321145	0.942	0.651	1.42e-13	7.94e-26	0.450009	0.971	0.567	1.52e-21	7.43e-18	1.59e-25
Mfap5	3.62e-40	0.319808	0.405	0.053	6.94e-36	2.25e-53	0.469541	0.449	0.041	4.31e-49	3.62e-40	4.5e-53
Ltbp4	2.43e-54	0.316454	0.792	0.222	4.66e-50	2.78e-52	0.36238	0.787	0.193	5.33e-48	2.78e-52	4.86e-54
Filip1l	5.35e-57	0.314864	0.659	0.115	1.03e-52	1.62e-60	0.533286	0.846	0.185	3.1e-56	5.35e-57	3.23e-60
Cd248	4.5e-101	0.31448	0.711	0.051	8.63e-97	4.44e-97	0.295679	0.647	0.036	8.51e-93	4.44e-97	9e-101
Smoc2	8.1e-44	0.312915	0.434	0.058	1.55e-39	1.22e-33	0.38788	0.382	0.057	2.35e-29	1.22e-33	1.62e-43
Lrp1	1.67e-33	0.31129	0.867	0.401	3.21e-29	1.33e-25	0.306916	0.801	0.376	2.54e-21	1.33e-25	3.35e-33
Myl12a	5.04e-22	0.309015	0.994	0.952	9.67e-18	2.12e-20	0.300051	1	0.924	4.06e-16	2.12e-20	1.01e-21
Rsu1	8.89e-28	0.309012	0.96	0.714	1.7e-23	3.61e-21	0.332683	0.949	0.68	6.92e-17	3.61e-21	1.78e-27
Col4a2	7.73e-13	0.308907	0.96	0.838	1.48e-08	3.76e-14	0.268196	0.963	0.806	7.21e-10	7.73e-13	7.52e-14
Ilk	1.64e-27	0.308659	0.971	0.741	3.15e-23	2.53e-18	0.280176	0.963	0.695	4.85e-14	2.53e-18	3.28e-27
Lima1	3.7e-28	0.308365	0.879	0.457	7.09e-24	1.7e-16	0.273354	0.897	0.549	3.27e-12	1.7e-16	7.39e-28
Nkd1	5.26e-21	0.307417	0.798	0.42	1.01e-16	1.38e-25	0.448572	0.794	0.374	2.64e-21	5.26e-21	2.75e-25
Thra	1.8e-29	0.307075	0.965	0.603	3.46e-25	2.69e-31	0.363707	0.963	0.575	5.15e-27	1.8e-29	5.38e-31
Oaf	9.54e-30	0.307048	0.85	0.44	1.83e-25	2.72e-20	0.263305	0.801	0.396	5.22e-16	2.72e-20	1.91e-29
Pdgfrb	1.8e-71	0.306362	0.618	0.069	3.46e-67	3.38e-67	0.30881	0.654	0.078	6.48e-63	3.38e-67	3.61e-71
Rhoj	6.78e-85	0.306137	0.671	0.063	1.3e-80	3.92e-70	0.28674	0.618	0.064	7.52e-66	3.92e-70	1.36e-84
Tbx2	1.45e-54	0.305876	0.618	0.112	2.77e-50	2.93e-61	0.35464	0.625	0.084	5.62e-57	1.45e-54	5.86e-61
Gstm2	6.3e-27	0.304927	0.717	0.289	1.21e-22	3.33e-37	0.267964	0.743	0.215	6.39e-33	6.3e-27	6.67e-37
Sema3a	1.91e-83	0.304459	0.636	0.055	3.67e-79	7.42e-93	0.264604	0.618	0.033	1.42e-88	1.91e-83	1.48e-92
Capns1	3.76e-24	0.301254	0.988	0.87	7.21e-20	6.04e-17	0.25582	1	0.852	1.16e-12	6.04e-17	7.52e-24
Dlc1	1.03e-24	0.301097	0.879	0.503	1.97e-20	3.04e-24	0.333711	0.89	0.459	5.83e-20	3.04e-24	2.06e-24
Loxl2	2.64e-47	0.300391	0.705	0.188	5.05e-43	1.81e-48	0.257953	0.691	0.141	3.47e-44	2.64e-47	3.62e-48
Sptbn1	1.46e-18	0.299939	0.977	0.82	2.81e-14	3.29e-17	0.313797	1	0.784	6.31e-13	3.29e-17	2.93e-18
Pid1	1.33e-68	0.298119	0.601	0.067	2.56e-64	7.36e-84	0.340045	0.61	0.043	1.41e-79	1.33e-68	1.47e-83
Ly6h	3.89e-61	0.294941	0.561	0.067	7.46e-57	1.45e-62	0.25154	0.515	0.045	2.78e-58	3.89e-61	2.9e-62
Frem1	1.62e-40	0.294373	0.746	0.229	3.11e-36	3.11e-38	0.26445	0.669	0.165	5.96e-34	3.11e-38	3.24e-40
Junb	3.64e-11	0.293815	0.855	0.633	6.99e-07	3.56e-11	0.294042	0.897	0.692	6.82e-07	3.64e-11	7.11e-11
Cavin3	9e-32	0.29079	0.682	0.261	1.73e-27	9.18e-30	0.41039	0.64	0.207	1.76e-25	9.18e-30	1.8e-31
Tuba1a	1.68e-14	0.289985	0.994	0.928	3.22e-10	4.23e-15	0.327962	1	0.874	8.11e-11	1.68e-14	8.46e-15
Tpm2	2.48e-14	0.287401	0.994	0.859	4.76e-10	2.78e-14	0.347066	1	0.784	5.33e-10	2.78e-14	4.96e-14
Mxd4	1.42e-19	0.284101	0.965	0.713	2.73e-15	7.68e-20	0.289512	0.978	0.604	1.47e-15	1.42e-19	1.54e-19
Plcb1	1.9e-33	0.281814	0.595	0.176	3.65e-29	1.82e-30	0.308408	0.676	0.224	3.49e-26	1.82e-30	3.81e-33
Col16a1	2.31e-81	0.279824	0.642	0.058	4.44e-77	5.06e-85	0.274368	0.64	0.048	9.71e-81	2.31e-81	1.01e-84
Mmp2	2.08e-32	0.279371	0.908	0.397	3.98e-28	9.76e-30	0.312972	0.801	0.32	1.87e-25	9.76e-30	4.15e-32
Col12a1	7.1e-67	0.276417	0.624	0.082	1.36e-62	8.77e-89	0.406246	0.662	0.052	1.68e-84	7.1e-67	1.75e-88
Glipr2	7.78e-81	0.27622	0.688	0.074	1.49e-76	1.82e-70	0.322727	0.662	0.081	3.49e-66	1.82e-70	1.56e-80
Cygb	5.65e-64	0.269821	0.572	0.068	1.08e-59	2.62e-53	0.276226	0.478	0.049	5.03e-49	2.62e-53	1.13e-63
Actn1	1.3e-20	0.269062	0.96	0.706	2.5e-16	9.84e-26	0.331875	0.963	0.659	1.89e-21	1.3e-20	1.97e-25
Thbs1	1.16e-51	0.259568	0.584	0.097	2.23e-47	1.93e-37	0.261676	0.551	0.117	3.7e-33	1.93e-37	2.32e-51
Pdlim3	5.38e-38	0.259547	0.462	0.081	1.03e-33	6.52e-61	0.273705	0.559	0.058	1.25e-56	5.38e-38	1.3e-60
Itgb1	9.03e-17	0.258842	1	0.936	1.73e-12	9.06e-14	0.255377	1	0.935	1.74e-09	9.06e-14	1.81e-16
Gnas	2.94e-30	0.255381	1	1	5.64e-26	1.69e-35	0.340124	1	0.999	3.25e-31	2.94e-30	3.39e-35
Tm4sf1	2.18e-16	0.254793	0.491	0.196	4.19e-12	2.07e-18	0.289984	0.441	0.14	3.97e-14	2.18e-16	4.14e-18
Gpm6b	2.33e-54	0.253684	0.647	0.121	4.46e-50	3.52e-54	0.270059	0.699	0.13	6.75e-50	3.52e-54	4.65e-54
Meis2	9.2e-11	0.251569	0.983	0.916	1.76e-06	9.91e-11	0.251584	1	0.844	1.9e-06	9.91e-11	1.84e-10
Ube2c	0.631842	-0.250876	0.763	0.683	1	0.637219	-0.35962	0.743	0.655	1	0.637219	0.864459
Arl4c	0.0153954	-0.253442	0.509	0.491	1	0.000414974	-0.29629	0.493	0.553	1	0.0153954	0.000829775
Rab3ip	0.00182698	-0.267579	0.566	0.575	1	0.000249114	-0.343192	0.618	0.613	1	0.00182698	0.000498167
Pdgfa	4.41e-06	-0.271586	0.803	0.819	0.0846233	0.00116408	-0.365499	0.875	0.802	1	0.00116408	8.83e-06
Ezr	5.34e-07	-0.282443	0.838	0.798	0.0102484	2.32e-07	-0.326077	0.86	0.844	0.00443997	5.34e-07	4.63e-07
Ccnd1	0.314486	-0.288569	0.85	0.739	1	0.259869	-0.329809	0.86	0.717	1	0.314486	0.452206
Phgdh	1.57e-11	-0.302044	0.994	0.984	3e-07	1.89e-09	-0.406292	0.971	0.974	3.61e-05	1.89e-09	3.13e-11
Pax8	0.00281539	-0.320034	0.636	0.632	1	0.00110899	-0.332598	0.618	0.651	1	0.00281539	0.00221676
Gm266	3.17e-09	-0.321104	0.96	0.945	6.07e-05	0.000232333	-0.280493	0.926	0.88	1	0.000232333	6.33e-09
Epcam	0.0635439	-0.328814	0.48	0.455	1	0.000938815	-0.551301	0.375	0.461	1	0.0635439	0.00187675
Clu	0.0150326	-0.330851	0.434	0.47	1	0.00255049	-0.403682	0.493	0.539	1	0.0150326	0.00509448
Uncx	8.92e-07	-0.334626	0.942	0.898	0.0171053	0.000691196	-0.300854	0.919	0.869	1	0.000691196	1.78e-06
Lhx1	0.0604934	-0.517597	0.387	0.406	1	0.124303	-0.487215	0.463	0.469	1	0.124303	0.117327
Wfdc2	3.03e-07	-0.585212	0.74	0.753	0.00580861	0.00564428	-0.513917	0.699	0.659	1	0.00564428	6.06e-07

## Sheet: Tubule_progenitors.2.marker
Gene	Mutant_p_val	Mutant_avg_logFC	Mutant_pct.1	Mutant_pct.2	Mutant_p_val_adj	CTRL_p_val	CTRL_avg_logFC	CTRL_pct.1	CTRL_pct.2	CTRL_p_val_adj	max_pval	minimump_p_val
Mki67	6.52e-29	0.762239	0.888	0.585	1.25e-24	6.16e-33	0.738334	0.95	0.524	1.18e-28	6.52e-29	1.23e-32
Top2a	1.38e-31	0.783239	0.938	0.617	2.64e-27	5.22e-27	0.737402	0.929	0.607	1e-22	5.22e-27	2.75e-31
Hist1h1b	1.02e-16	0.648716	0.888	0.656	1.95e-12	6.32e-17	0.737387	0.858	0.64	1.21e-12	1.02e-16	1.26e-16
Cenpf	3.07e-31	0.809665	0.944	0.57	5.88e-27	2.72e-28	0.694495	0.95	0.525	5.21e-24	2.72e-28	6.13e-31
Hist1h2ap	2.22e-18	0.691404	0.975	0.905	4.26e-14	3.8e-18	0.681634	0.943	0.778	7.28e-14	3.8e-18	4.44e-18
Hmgb2	2.18e-33	0.672361	1	0.963	4.19e-29	4.03e-29	0.677881	1	0.961	7.72e-25	4.03e-29	4.37e-33
Cenpe	1.18e-24	0.590718	0.913	0.552	2.26e-20	1.21e-23	0.571795	0.887	0.483	2.32e-19	1.21e-23	2.35e-24
H2afx	7.22e-25	0.566371	0.988	0.852	1.38e-20	1.37e-22	0.567125	0.972	0.823	2.63e-18	1.37e-22	1.44e-24
Tpx2	2.68e-27	0.522143	0.882	0.491	5.14e-23	4.32e-30	0.565321	0.922	0.461	8.28e-26	2.68e-27	8.64e-30
Spc25	2.34e-28	0.511625	0.907	0.601	4.48e-24	4.55e-27	0.541689	0.908	0.598	8.73e-23	4.55e-27	4.68e-28
Hist1h2ae	5.41e-13	0.592665	0.863	0.687	1.04e-08	3.51e-14	0.537612	0.844	0.634	6.72e-10	5.41e-13	7.01e-14
Nusap1	1.05e-24	0.572034	0.82	0.441	2.01e-20	1.17e-20	0.536867	0.801	0.431	2.25e-16	1.17e-20	2.09e-24
Stmn1	6.39e-30	0.414127	1	1	1.23e-25	9.2e-36	0.526713	1	0.997	1.76e-31	6.39e-30	1.84e-35
Smc4	1.22e-31	0.546373	0.988	0.784	2.33e-27	1.41e-23	0.524499	0.979	0.754	2.71e-19	1.41e-23	2.44e-31
Birc5	1.41e-27	0.510827	0.963	0.603	2.7e-23	3.08e-25	0.517499	0.965	0.573	5.91e-21	3.08e-25	2.82e-27
Ube2c	5.71e-21	0.621724	0.919	0.653	1.1e-16	7.29e-19	0.506951	0.929	0.625	1.4e-14	7.29e-19	1.14e-20
Cenpa	4.37e-17	0.498209	0.851	0.549	8.38e-13	9.98e-17	0.505774	0.844	0.53	1.91e-12	9.98e-17	8.74e-17
Pclaf	5.83e-23	0.521291	0.981	0.697	1.12e-18	7.01e-21	0.503552	0.993	0.654	1.34e-16	7.01e-21	1.17e-22
Cks2	1.03e-21	0.544483	0.913	0.728	1.98e-17	1.37e-22	0.501687	0.965	0.697	2.62e-18	1.03e-21	2.73e-22
Cdca8	5.88e-31	0.550432	0.957	0.578	1.13e-26	8.71e-27	0.499015	0.965	0.537	1.67e-22	8.71e-27	1.18e-30
Cenpw	1.13e-27	0.410908	0.975	0.774	2.18e-23	5.26e-29	0.477799	0.943	0.717	1.01e-24	1.13e-27	1.05e-28
Cdc20	1.32e-21	0.531083	0.863	0.502	2.53e-17	2.04e-17	0.46732	0.837	0.502	3.91e-13	2.04e-17	2.64e-21
Tuba1b	1.55e-25	0.437369	1	0.988	2.97e-21	1.29e-22	0.454844	1	0.99	2.48e-18	1.29e-22	3.1e-25
Lmnb1	8.58e-25	0.386968	0.994	0.924	1.64e-20	2.2e-25	0.448247	0.993	0.88	4.22e-21	8.58e-25	4.4e-25
Fbxo5	3.03e-18	0.379792	0.776	0.451	5.81e-14	9.34e-22	0.447571	0.773	0.426	1.79e-17	3.03e-18	1.87e-21
Kif15	1.52e-27	0.37355	0.851	0.435	2.92e-23	1.66e-27	0.443974	0.816	0.431	3.18e-23	1.66e-27	3.05e-27
Hist1h1e	1.51e-08	0.334284	0.882	0.784	0.000288949	2.39e-13	0.434095	0.922	0.78	4.58e-09	1.51e-08	4.78e-13
Ube2s	3.16e-17	0.372072	1	0.98	6.06e-13	4.74e-20	0.426245	1	0.971	9.09e-16	3.16e-17	9.49e-20
Dek	2.69e-19	0.347775	1	0.979	5.16e-15	1.96e-21	0.423968	1	0.982	3.75e-17	2.69e-19	3.92e-21
H1fx	2.04e-15	0.366959	1	0.947	3.92e-11	2.45e-18	0.419277	0.993	0.911	4.69e-14	2.04e-15	4.89e-18
H2afz	3.94e-20	0.359481	1	1	7.55e-16	1.42e-24	0.414794	1	1	2.72e-20	3.94e-20	2.83e-24
Racgap1	5.71e-26	0.423231	0.826	0.453	1.09e-21	5.6e-25	0.413294	0.858	0.443	1.07e-20	5.6e-25	1.14e-25
Hmmr	1.12e-30	0.502449	0.814	0.361	2.15e-26	2.89e-21	0.413285	0.78	0.371	5.55e-17	2.89e-21	2.24e-30
Nucks1	4.66e-25	0.420747	1	0.972	8.94e-21	3.02e-21	0.410207	1	0.954	5.78e-17	3.02e-21	9.33e-25
Ccnb1	4.4e-22	0.450665	0.814	0.431	8.43e-18	2.43e-18	0.402843	0.794	0.413	4.65e-14	2.43e-18	8.79e-22
Prc1	4.9e-17	0.470349	0.727	0.419	9.4e-13	1.17e-14	0.402772	0.752	0.421	2.24e-10	1.17e-14	9.8e-17
Mis18bp1	4.39e-28	0.41154	0.807	0.398	8.42e-24	8.48e-25	0.402708	0.787	0.357	1.63e-20	8.48e-25	8.78e-28
Tubb5	1.19e-23	0.38195	1	1	2.29e-19	9.36e-25	0.399817	1	1	1.8e-20	1.19e-23	1.87e-24
Ccna2	1.02e-26	0.408531	0.894	0.481	1.95e-22	2.79e-25	0.398771	0.887	0.448	5.35e-21	2.79e-25	2.03e-26
Spc24	6.09e-32	0.483479	0.981	0.626	1.17e-27	2.59e-21	0.387599	0.943	0.586	4.97e-17	2.59e-21	1.22e-31
Smc2	5.92e-23	0.3866	0.988	0.708	1.14e-18	2.38e-17	0.386189	0.922	0.675	4.57e-13	2.38e-17	1.18e-22
Atad2	2.08e-10	0.344259	0.814	0.629	3.99e-06	3.44e-13	0.383847	0.809	0.557	6.6e-09	2.08e-10	6.88e-13
Hjurp	3.66e-13	0.269378	0.845	0.663	7.01e-09	2.21e-21	0.380322	0.887	0.632	4.24e-17	3.66e-13	4.43e-21
Cdca3	1.27e-17	0.349147	0.851	0.537	2.44e-13	7.17e-19	0.378834	0.858	0.501	1.37e-14	1.27e-17	1.43e-18
Bub1b	1.81e-29	0.396232	0.807	0.394	3.48e-25	2e-26	0.376086	0.787	0.363	3.84e-22	2e-26	3.63e-29
Ccnb2	3.96e-12	0.335172	0.814	0.545	7.6e-08	1.78e-14	0.373144	0.844	0.499	3.41e-10	3.96e-12	3.56e-14
Tacc3	4.88e-18	0.289396	0.826	0.493	9.36e-14	4.43e-22	0.355937	0.844	0.451	8.5e-18	4.88e-18	8.87e-22
Ckap5	2.22e-14	0.319783	0.894	0.717	4.26e-10	1.75e-14	0.3536	0.879	0.662	3.36e-10	2.22e-14	3.5e-14
Hist1h4d	9.81e-13	0.379768	0.795	0.568	1.88e-08	2e-11	0.350748	0.752	0.558	3.84e-07	2e-11	1.96e-12
Hirip3	1.43e-15	0.3366	0.932	0.772	2.74e-11	4.97e-15	0.349856	0.901	0.743	9.53e-11	4.97e-15	2.86e-15
Kif11	4.13e-26	0.402428	0.739	0.352	7.93e-22	1.41e-17	0.348447	0.681	0.347	2.7e-13	1.41e-17	8.27e-26
Tubb4b	1.59e-16	0.42863	0.988	0.856	3.04e-12	1.26e-14	0.347746	1	0.817	2.42e-10	1.26e-14	3.17e-16
Lockd	2.37e-17	0.353985	0.733	0.436	4.55e-13	1.14e-21	0.345002	0.78	0.408	2.19e-17	2.37e-17	2.29e-21
Cks1b	2.31e-26	0.385849	0.994	0.911	4.43e-22	3.83e-18	0.342883	0.993	0.89	7.34e-14	3.83e-18	4.62e-26
Hoxc8	4.91e-12	0.260293	0.944	0.778	9.41e-08	1.77e-15	0.339823	0.915	0.706	3.39e-11	4.91e-12	3.54e-15
Six2	5.06e-15	0.351075	0.95	0.686	9.71e-11	1.8e-15	0.338941	0.957	0.586	3.45e-11	5.06e-15	3.6e-15
Clspn	4.19e-14	0.253744	0.789	0.485	8.04e-10	3.79e-16	0.331548	0.773	0.454	7.27e-12	4.19e-14	7.58e-16
Pbk	4.77e-23	0.332517	0.863	0.443	9.15e-19	2.5e-20	0.327267	0.83	0.437	4.8e-16	2.5e-20	9.55e-23
Knl1	2.18e-25	0.325833	0.795	0.381	4.17e-21	9.59e-20	0.324458	0.752	0.372	1.84e-15	9.59e-20	4.35e-25
Kif23	4.77e-22	0.403498	0.795	0.399	9.15e-18	3.87e-16	0.318262	0.759	0.422	7.42e-12	3.87e-16	9.55e-22
Tyms	9.65e-14	0.312448	0.95	0.733	1.85e-09	2.19e-10	0.315533	0.858	0.693	4.19e-06	2.19e-10	1.93e-13
Incenp	3.46e-29	0.457026	0.851	0.468	6.64e-25	1.18e-15	0.313367	0.78	0.45	2.26e-11	1.18e-15	6.93e-29
Sgo1	2.38e-18	0.252311	0.745	0.408	4.56e-14	4.76e-18	0.307318	0.78	0.423	9.12e-14	4.76e-18	4.76e-18
Sgo2a	2.53e-24	0.306519	0.752	0.353	4.86e-20	2.6e-19	0.306398	0.716	0.339	4.99e-15	2.6e-19	5.07e-24
Aspm	3.63e-19	0.293607	0.59	0.265	6.95e-15	7.62e-18	0.302992	0.589	0.257	1.46e-13	7.62e-18	7.25e-19
Arl6ip1	8.63e-07	0.3988	0.919	0.832	0.0165378	1.1e-06	0.300978	0.957	0.853	0.0210509	1.1e-06	1.73e-06
Knstrn	1.85e-12	0.264377	0.826	0.576	3.55e-08	7.97e-16	0.296684	0.823	0.525	1.53e-11	1.85e-12	1.59e-15
Aurkb	6.75e-23	0.335796	0.807	0.396	1.29e-18	2.57e-15	0.294962	0.73	0.39	4.92e-11	2.57e-15	1.35e-22
Rad21	1.17e-17	0.319808	0.957	0.803	2.25e-13	3.32e-14	0.293194	0.965	0.775	6.36e-10	3.32e-14	2.35e-17
Hoxc10	9.52e-14	0.265991	0.975	0.907	1.83e-09	2.6e-13	0.290213	0.979	0.884	4.99e-09	2.6e-13	1.9e-13
Dlgap5	1.24e-16	0.262753	0.696	0.363	2.38e-12	2.64e-16	0.283325	0.716	0.361	5.07e-12	2.64e-16	2.48e-16
Kif2c	1.03e-20	0.265298	0.714	0.344	1.98e-16	2.81e-14	0.280747	0.61	0.318	5.39e-10	2.81e-14	2.07e-20
Anp32e	9.18e-16	0.280252	0.988	0.919	1.76e-11	7.9e-16	0.27493	0.986	0.905	1.51e-11	9.18e-16	1.58e-15
Cdk1	5.13e-20	0.410941	0.919	0.631	9.83e-16	1.43e-11	0.274095	0.851	0.604	2.74e-07	1.43e-11	1.03e-19
Ckap2l	6.99e-27	0.344975	0.776	0.354	1.34e-22	1.34e-15	0.269976	0.695	0.355	2.57e-11	1.34e-15	1.4e-26
Tmpo	7.6e-18	0.287957	1	0.919	1.46e-13	3.2e-13	0.26534	0.979	0.892	6.13e-09	3.2e-13	1.52e-17
Kif22	1.73e-17	0.29069	0.783	0.419	3.32e-13	5.54e-15	0.260112	0.752	0.415	1.06e-10	5.54e-15	3.46e-17
Pimreg	3.37e-14	0.295713	0.658	0.363	6.46e-10	4.98e-11	0.255846	0.603	0.336	9.55e-07	4.98e-11	6.74e-14
Ezh2	3.59e-14	0.256391	0.963	0.9	6.87e-10	2.58e-12	0.254629	0.972	0.897	4.95e-08	2.58e-12	7.17e-14
Kif20b	1.4e-18	0.261317	0.801	0.426	2.68e-14	4.54e-14	0.252935	0.745	0.408	8.71e-10	4.54e-14	2.8e-18
S100a16	1.72e-09	-0.263162	0.422	0.593	3.31e-05	5.25e-08	-0.250208	0.44	0.614	0.00100604	5.25e-08	3.45e-09
Fermt2	7.61e-13	-0.29142	0.708	0.811	1.46e-08	8.25e-09	-0.258338	0.773	0.796	0.00015821	8.25e-09	1.52e-12
Rrbp1	1.68e-12	-0.310731	0.932	0.946	3.23e-08	3.55e-08	-0.259272	0.929	0.92	0.000680766	3.55e-08	3.37e-12
Cdh6	0.00417527	-0.268116	0.317	0.393	1	0.0387306	-0.260233	0.454	0.476	1	0.0387306	0.00833311
Cnn2	0.00207192	-0.33555	0.522	0.536	1	0.0141837	-0.269256	0.418	0.468	1	0.0141837	0.00413955
Maged2	2.93e-11	-0.441599	0.888	0.895	5.61e-07	2.08e-06	-0.280939	0.865	0.852	0.0397923	2.08e-06	5.85e-11
Srgap1	1.8e-06	-0.258188	0.503	0.603	0.0345357	2.42e-06	-0.283845	0.39	0.55	0.0463886	2.42e-06	3.6e-06
Rcn1	1.14e-14	-0.401185	0.832	0.893	2.19e-10	1.18e-05	-0.284125	0.851	0.868	0.2272	1.18e-05	2.29e-14
Mecom	0.000440204	-0.261113	0.18	0.299	1	0.00720689	-0.291546	0.27	0.347	1	0.00720689	0.000880215
Myl6	1.7e-17	-0.291713	1	1	3.26e-13	1.35e-12	-0.296018	1	0.998	2.6e-08	1.35e-12	3.4e-17
Hes5	6.7e-05	-0.25327	0.025	0.132	1	0.000135202	-0.300339	0.035	0.152	1	0.000135202	0.000134057
Basp1	9.5e-07	-0.258902	0.814	0.829	0.0182247	0.00021639	-0.302928	0.787	0.763	1	0.00021639	1.9e-06
Fn1	1.53e-07	-0.470245	0.441	0.546	0.00293633	0.00438856	-0.304605	0.369	0.444	1	0.00438856	3.06e-07
Cfh	3.36e-06	-0.362985	0.161	0.315	0.0643557	0.000356504	-0.306589	0.149	0.273	1	0.000356504	6.71e-06
Epha4	6.55e-08	-0.351484	0.261	0.449	0.00125651	3.84e-06	-0.321571	0.291	0.446	0.0736538	3.84e-06	1.31e-07
Fxyd2	0.00928186	-0.263745	0.292	0.36	1	0.862552	-0.324249	0.546	0.467	1	0.862552	0.0184776
Clec18a	6.82e-10	-0.438769	0.224	0.43	1.31e-05	2.63e-08	-0.324356	0.213	0.439	0.00050428	2.63e-08	1.36e-09
Prss23	6.21e-11	-0.285244	0.075	0.324	1.19e-06	7.47e-11	-0.333181	0.085	0.346	1.43e-06	7.47e-11	1.24e-10
Lamb1	6.65e-07	-0.264787	0.559	0.659	0.0127566	4.46e-09	-0.335018	0.61	0.705	8.54e-05	6.65e-07	8.91e-09
Eva1a	1.14e-05	-0.266948	0.292	0.433	0.218007	1.51e-07	-0.335201	0.284	0.476	0.00289316	1.14e-05	3.02e-07
Sfrp2	6.71e-08	-0.515547	0.571	0.673	0.00128694	0.0611634	-0.345793	0.674	0.643	1	0.0611634	1.34e-07
Osr2	6.42e-09	-0.336664	0.124	0.343	0.000123174	0.000172069	-0.351834	0.234	0.361	1	0.000172069	1.28e-08
Eva1b	4.52e-10	-0.301402	0.646	0.751	8.67e-06	2.13e-11	-0.351978	0.553	0.719	4.09e-07	4.52e-10	4.27e-11
Pax8	1.39e-05	-0.463714	0.59	0.641	0.26647	0.000753796	-0.365294	0.652	0.646	1	0.000753796	2.78e-05
Dcn	0.0209471	-0.536979	0.385	0.418	1	0.0014116	-0.387075	0.149	0.257	1	0.0209471	0.00282121
Myl9	0.000412959	-0.413178	0.46	0.527	1	0.0417786	-0.390338	0.411	0.437	1	0.0417786	0.000825748
Emid1	1.15e-10	-0.490489	0.41	0.609	2.2e-06	6.41e-09	-0.403841	0.404	0.582	0.000122834	6.41e-09	2.29e-10
Arl4c	1.65e-06	-0.323128	0.379	0.516	0.0316033	5.27e-09	-0.415219	0.383	0.57	0.000101037	1.65e-06	1.05e-08
Emx2	3.64e-11	-0.357313	0.043	0.282	6.99e-07	1.58e-11	-0.415798	0.085	0.355	3.03e-07	3.64e-11	3.16e-11
Meg3	0.000838336	-0.502877	0.348	0.432	1	0.00229084	-0.421634	0.206	0.3	1	0.00229084	0.00167597
S100a10	3.21e-08	-0.377548	0.733	0.734	0.000616006	1.05e-08	-0.427171	0.73	0.767	0.000201057	3.21e-08	2.1e-08
Col4a1	7.31e-13	-0.366614	0.944	0.929	1.4e-08	1e-14	-0.446165	0.858	0.901	1.92e-10	7.31e-13	2.01e-14
Rab3ip	0.00365472	-0.27547	0.578	0.573	1	2.08e-08	-0.454581	0.518	0.629	0.000399289	0.00365472	4.16e-08
Tmem176b	4.01e-14	-0.274549	0.907	0.947	7.69e-10	2.13e-11	-0.454851	0.929	0.937	4.08e-07	2.13e-11	8.02e-14
Pcp4	0.0884771	-0.421637	0.497	0.526	1	0.112825	-0.460684	0.454	0.462	1	0.112825	0.169126
Mafb	0.000591157	-0.539426	0.267	0.366	1	0.577402	-0.467023	0.376	0.356	1	0.577402	0.00118196
Fstl1	6.73e-14	-0.40689	0.745	0.834	1.29e-09	1.17e-12	-0.468958	0.709	0.818	2.24e-08	1.17e-12	1.35e-13
Lgals1	0.000370682	-0.560464	0.77	0.722	1	0.000633549	-0.507387	0.631	0.645	1	0.000633549	0.000741227
Penk	1.02e-05	-0.634423	0.236	0.375	0.194794	0.0121407	-0.509147	0.227	0.303	1	0.0121407	2.03e-05
S100a6	3.66e-05	-0.26668	0.23	0.357	0.702544	0.0188252	-0.51	0.277	0.337	1	0.0188252	7.33e-05
Tagln	9.79e-06	-0.453732	0.161	0.324	0.187633	0.360029	-0.582141	0.333	0.34	1	0.360029	1.96e-05
Col1a1	7.31e-10	-0.823612	0.466	0.612	1.4e-05	0.000381844	-0.583195	0.326	0.424	1	0.000381844	1.46e-09
Anxa2	3.08e-13	-0.48851	0.422	0.628	5.91e-09	6.3e-14	-0.588112	0.376	0.612	1.21e-09	3.08e-13	1.26e-13
Col3a1	1.1e-07	-0.820406	0.41	0.554	0.00211599	0.000225894	-0.608103	0.284	0.397	1	0.000225894	2.21e-07
Cldn5	1.75e-08	-0.733169	0.199	0.387	0.000335861	1.44e-06	-0.61729	0.17	0.359	0.0276594	1.44e-06	3.5e-08
Cdkn1c	2.89e-08	-0.904053	0.963	0.937	0.000553914	0.0508121	-0.621005	0.95	0.902	1	0.0508121	5.78e-08
Epcam	1.19e-06	-0.380266	0.317	0.487	0.0228164	1.49e-06	-0.693257	0.326	0.469	0.0285981	1.49e-06	2.38e-06
Col1a2	2.21e-07	-0.903762	0.584	0.653	0.00423841	2.31e-05	-0.754463	0.326	0.457	0.442907	2.31e-05	4.42e-07
Clu	4.91e-09	-0.662865	0.329	0.49	9.42e-05	4.58e-14	-0.795556	0.305	0.569	8.78e-10	4.91e-09	9.16e-14
Acta2	0.00744799	-0.763693	0.696	0.668	1	0.0838636	-0.816309	0.596	0.585	1	0.0838636	0.0148405
Tmsb4x	1.4e-06	-1.07204	1	0.968	0.0267764	0.0124609	-0.892996	0.993	0.959	1	0.0124609	2.79e-06
Igfbp7	5.33e-19	-0.839456	0.447	0.653	1.02e-14	1.52e-15	-0.98897	0.596	0.714	2.91e-11	1.52e-15	1.07e-18
Ccnd1	1.65e-07	-0.914595	0.72	0.766	0.00317199	6.39e-12	-1.00124	0.631	0.753	1.23e-07	1.65e-07	1.28e-11
Lhx1	1.24e-13	-1.07913	0.168	0.449	2.38e-09	2.38e-14	-1.08065	0.206	0.51	4.57e-10	1.24e-13	4.77e-14

## Sheet: Tubule_progenitors.3.marker
Gene	Mutant_p_val	Mutant_avg_logFC	Mutant_pct.1	Mutant_pct.2	Mutant_p_val_adj	CTRL_p_val	CTRL_avg_logFC	CTRL_pct.1	CTRL_pct.2	CTRL_p_val_adj	max_pval	minimump_p_val
Cldn5	2.64175e-82	1.65186	0.947	0.263	5.06529e-78	5.75489e-86	1.63514	0.955	0.24	1.10344e-81	2.64175e-82	1.15098e-85
Tm6sf1	3.66128e-50	0.513693	0.737	0.189	7.02014e-46	2.879e-73	0.633862	0.805	0.149	5.5202e-69	3.66128e-50	5.75801e-73
Mafb	5.0708e-58	1.51609	0.85	0.272	9.72275e-54	5.93951e-50	1.4588	0.82	0.291	1.13884e-45	5.93951e-50	1.01416e-57
Pdzd2	3.87523e-47	0.625843	0.902	0.357	7.43037e-43	4.03458e-56	0.67136	0.88	0.275	7.73591e-52	3.87523e-47	8.06916e-56
Pcp4	5.3586e-41	1.33571	0.902	0.462	1.02746e-36	2.36729e-54	1.3855	0.932	0.391	4.53905e-50	5.3586e-41	4.73459e-54
Pax8	1.23637e-53	0.999571	0.977	0.579	2.37062e-49	2.57393e-50	0.89201	0.985	0.597	4.93524e-46	2.57393e-50	2.47274e-53
Hspa12a	7.04532e-51	0.372593	0.594	0.102	1.35087e-46	5.00246e-37	0.337233	0.481	0.092	9.59172e-33	5.00246e-37	1.40906e-50
Ndnf	5.57076e-50	0.579527	0.654	0.132	1.06814e-45	7.36093e-39	0.562636	0.549	0.12	1.41138e-34	7.36093e-39	1.11415e-49
Efnb2	9.67155e-35	0.324507	0.639	0.179	1.85442e-30	1.63689e-49	0.419083	0.654	0.135	3.13857e-45	9.67155e-35	3.27378e-49
Lhx1	5.43314e-49	1.04179	0.932	0.32	1.04175e-44	2.44851e-41	0.948705	0.94	0.398	4.69478e-37	2.44851e-41	1.08663e-48
Rai14	8.73747e-44	0.613255	0.925	0.54	1.67532e-39	1.36787e-48	0.628469	0.94	0.47	2.62276e-44	8.73747e-44	2.73575e-48
Npy	7.5234e-42	0.436261	0.699	0.179	1.44254e-37	2.14154e-47	0.516687	0.774	0.188	4.10619e-43	7.5234e-42	4.28308e-47
Clec18a	2.19224e-46	0.685803	0.895	0.318	4.20339e-42	4.25966e-35	0.526987	0.865	0.34	8.16748e-31	4.25966e-35	4.38447e-46
Siva1	1.38366e-45	0.610576	1	0.987	2.65302e-41	6.96909e-42	0.628153	1	0.977	1.33625e-37	6.96909e-42	2.76731e-45
Emid1	8.66217e-45	0.754602	0.97	0.515	1.66088e-40	4.59916e-35	0.577675	0.932	0.502	8.81842e-31	4.59916e-35	1.73243e-44
Hs3st3b1	1.32851e-44	0.433848	0.729	0.185	2.54728e-40	3.22414e-37	0.470329	0.729	0.232	6.18196e-33	3.22414e-37	2.65702e-44
Eva1a	1.3418e-43	0.697942	0.865	0.339	2.57278e-39	2.69517e-31	0.541202	0.835	0.392	5.16771e-27	2.69517e-31	2.68361e-43
Hey1	1.70296e-43	0.514532	0.902	0.368	3.26526e-39	4.11547e-38	0.513523	0.842	0.377	7.89099e-34	4.11547e-38	3.40592e-43
Pmp22	3.1878e-43	0.760823	0.82	0.288	6.11229e-39	1.00204e-33	0.688957	0.699	0.24	1.92132e-29	1.00204e-33	6.3756e-43
Lhx1os	6.94379e-43	0.393515	0.752	0.194	1.3314e-38	3.83825e-31	0.336906	0.767	0.266	7.35946e-27	3.83825e-31	1.38876e-42
Lama4	2.81921e-37	0.444193	0.827	0.334	5.40556e-33	1.10567e-42	0.531611	0.82	0.286	2.12002e-38	2.81921e-37	2.21135e-42
Sfrp2	1.78052e-41	0.750108	0.962	0.608	3.41396e-37	8.86465e-41	0.787547	0.97	0.599	1.69971e-36	8.86465e-41	3.56103e-41
Hmgn1	3.41149e-40	0.403204	1	1	6.54119e-36	3.73114e-24	0.309524	1	1	7.15409e-20	3.73114e-24	6.82298e-40
Sdk2	5.17851e-39	0.385313	0.744	0.224	9.92928e-35	2.07871e-38	0.426522	0.654	0.18	3.98571e-34	2.07871e-38	1.0357e-38
Tspan15	1.07919e-38	0.413524	0.782	0.293	2.06924e-34	2.81061e-36	0.497314	0.692	0.231	5.38907e-32	2.81061e-36	2.15838e-38
Ccnd1	1.55786e-38	1.29452	0.97	0.725	2.98704e-34	8.05247e-37	1.19909	0.955	0.704	1.54398e-32	8.05247e-37	3.11572e-38
Gm266	7.55627e-32	0.693832	0.992	0.941	1.44884e-27	1.83282e-38	0.771656	0.992	0.87	3.51425e-34	7.55627e-32	3.66564e-38
Sh3bp4	6.44239e-28	0.369388	0.699	0.301	1.23526e-23	2.22656e-38	0.428995	0.782	0.292	4.2692e-34	6.44239e-28	4.45312e-38
H2afz	4.20753e-38	0.534503	1	1	8.06752e-34	1.71913e-24	0.444482	1	1	3.29626e-20	1.71913e-24	8.41506e-38
Tgfbi	5.1456e-38	-0.947275	0.256	0.796	9.86617e-34	1.86414e-28	-0.962135	0.233	0.705	3.57429e-24	1.86414e-28	1.02912e-37
Ptpru	2.97306e-37	0.370416	0.571	0.138	5.70055e-33	8.23715e-31	0.386593	0.541	0.15	1.57939e-26	8.23715e-31	5.94612e-37
Nrip2	1.62982e-24	0.299623	0.519	0.157	3.12502e-20	1.78592e-36	0.277276	0.602	0.153	3.42433e-32	1.62982e-24	3.57185e-36
Rrm2	2.29519e-36	0.672165	0.955	0.529	4.40079e-32	3.46945e-21	0.480858	0.85	0.472	6.65232e-17	3.46945e-21	4.59037e-36
Clu	6.77762e-36	0.744488	0.895	0.396	1.29954e-31	9.86235e-19	0.442711	0.872	0.483	1.89101e-14	9.86235e-19	1.35552e-35
Rasl11a	4.20659e-30	0.543853	0.774	0.342	8.06571e-26	4.98758e-35	0.548399	0.759	0.282	9.56318e-31	4.20659e-30	9.97516e-35
Igfbp6	1.11041e-34	0.464173	0.707	0.241	2.1291e-30	1.8329e-25	0.457278	0.564	0.193	3.5144e-21	1.8329e-25	2.22082e-34
Tmem37	2.66717e-34	0.542544	0.767	0.293	5.11403e-30	3.40696e-24	0.460801	0.662	0.285	6.5325e-20	3.40696e-24	5.33433e-34
Bmp4	3.47405e-34	0.51321	0.917	0.478	6.66114e-30	1.09938e-33	0.634533	0.895	0.488	2.10795e-29	1.09938e-33	6.94809e-34
Nasp	5.41078e-34	0.60679	0.992	0.974	1.03746e-29	6.41572e-32	0.615051	1	0.918	1.23015e-27	6.41572e-32	1.08216e-33
Six2	1.43492e-33	-0.883446	0.353	0.789	2.75131e-29	8.96392e-21	-0.746194	0.368	0.677	1.71874e-16	8.96392e-21	2.86983e-33
Hnrnpab	1.16055e-32	0.421511	0.992	0.989	2.22525e-28	4.20845e-21	0.359542	0.992	0.987	8.06928e-17	4.20845e-21	2.32111e-32
Foxc2	1.39151e-22	0.523765	0.88	0.586	2.66808e-18	2.03556e-32	0.63555	0.902	0.525	3.90298e-28	1.39151e-22	4.07111e-32
Cox4i2	1.02944e-25	0.267686	0.571	0.184	1.97384e-21	2.56064e-32	0.340273	0.594	0.166	4.90977e-28	1.02944e-25	5.12128e-32
Srsf3	4.3061e-32	0.367753	1	0.999	8.25651e-28	3.62761e-16	0.282751	1	0.998	6.95558e-12	3.62761e-16	8.6122e-32
Pgp	6.90942e-32	0.535317	0.94	0.682	1.32481e-27	5.20844e-28	0.468617	0.925	0.658	9.98667e-24	5.20844e-28	1.38188e-31
Hmgb3	6.96081e-32	0.499441	1	0.982	1.33467e-27	4.57714e-28	0.466999	1	0.962	8.7762e-24	4.57714e-28	1.39216e-31
Osr2	1.17853e-31	0.423278	0.737	0.24	2.25972e-27	2.10221e-17	0.296185	0.669	0.295	4.03078e-13	2.10221e-17	2.35706e-31
Wt1	3.28129e-25	0.635663	0.992	0.876	6.29154e-21	3.44118e-31	0.736259	0.985	0.78	6.59813e-27	3.28129e-25	6.88237e-31
Ngfr	4.69011e-31	0.390292	0.594	0.172	8.99281e-27	3.13093e-23	0.299263	0.451	0.123	6.00325e-19	3.13093e-23	9.38021e-31
Ran	5.60902e-31	0.399623	1	0.996	1.07547e-26	5.94526e-27	0.369728	1	0.999	1.13994e-22	5.94526e-27	1.1218e-30
Map1b	6.57713e-25	0.499192	0.887	0.604	1.2611e-20	9.12637e-31	0.546188	0.947	0.544	1.74989e-26	6.57713e-25	1.82527e-30
Tpm2	9.92044e-31	-0.993269	0.714	0.909	1.90215e-26	1.00732e-15	-0.876022	0.722	0.826	1.93144e-11	1.00732e-15	1.98409e-30
Efnb1	7.58469e-29	0.520604	0.925	0.699	1.45429e-24	1.87652e-30	0.533093	0.91	0.625	3.59803e-26	7.58469e-29	3.75303e-30
Stmn1	3.03242e-30	0.45129	1	1	5.81435e-26	1.06364e-29	0.475527	1	0.997	2.03943e-25	1.06364e-29	6.06483e-30
Hsp90aa1	4.29723e-30	0.372655	1	1	8.2395e-26	6.39754e-18	0.285864	1	0.999	1.22666e-13	6.39754e-18	8.59445e-30
Tmsb10	1.7108e-29	0.315269	1	0.999	3.28028e-25	1.47953e-28	0.370319	1	0.999	2.83685e-24	1.47953e-28	3.42159e-29
Dab1	3.30103e-26	0.260231	0.639	0.231	6.32939e-22	1.94422e-29	0.357193	0.722	0.279	3.72785e-25	3.30103e-26	3.88844e-29
Tnfaip2	4.95458e-25	0.263734	0.692	0.27	9.49992e-21	2.00439e-29	0.401103	0.684	0.251	3.84323e-25	4.95458e-25	4.00879e-29
Pclaf	2.05681e-29	0.655317	1	0.704	3.94372e-25	3.41953e-23	0.572269	0.977	0.659	6.5566e-19	3.41953e-23	4.11361e-29
Mest	2.63612e-29	-0.996536	0.827	0.963	5.0545e-25	9.75547e-16	-0.775434	0.782	0.878	1.87051e-11	9.75547e-16	5.27224e-29
Iqgap1	2.86327e-29	0.500125	0.97	0.758	5.49003e-25	5.85173e-24	0.463636	0.947	0.733	1.12201e-19	5.85173e-24	5.72654e-29
Igfbp5	3.03503e-29	-1.13155	0.459	0.842	5.81937e-25	1.72304e-20	-0.823123	0.451	0.765	3.30375e-16	1.72304e-20	6.07007e-29
Srgap1	1.16353e-28	0.601565	0.865	0.543	2.23096e-24	9.59792e-25	0.663171	0.797	0.488	1.8403e-20	9.59792e-25	2.32707e-28
Clmp	1.84171e-28	-0.606086	0.444	0.804	3.5313e-24	8.54195e-10	-0.38516	0.549	0.675	1.63783e-05	8.54195e-10	3.68343e-28
Cped1	1.90656e-28	-0.65485	0.436	0.785	3.65564e-24	5.23529e-17	-0.601827	0.489	0.698	1.00381e-12	5.23529e-17	3.81312e-28
Tenm4	1.23047e-21	0.298344	0.789	0.396	2.35931e-17	2.94619e-28	0.41	0.82	0.42	5.64902e-24	1.23047e-21	5.89238e-28
Notch1	1.46673e-26	0.541426	0.797	0.457	2.81231e-22	6.45538e-28	0.464449	0.85	0.482	1.23775e-23	1.46673e-26	1.29108e-27
Ttc28	6.47232e-28	-0.776794	0.624	0.858	1.241e-23	1.55369e-15	-0.607053	0.632	0.765	2.97904e-11	1.55369e-15	1.29446e-27
Gas1	1.48145e-27	-0.82584	0.82	0.948	2.84053e-23	7.53357e-15	-0.679383	0.789	0.894	1.44449e-10	7.53357e-15	2.96289e-27
Eif3m	9.57648e-24	0.418086	1	0.995	1.8362e-19	2.51604e-27	0.46553	1	0.997	4.82426e-23	9.57648e-24	5.03208e-27
Lmnb1	2.58274e-27	0.448049	1	0.926	4.95214e-23	1.33265e-18	0.397022	0.985	0.883	2.55523e-14	1.33265e-18	5.16547e-27
Cited1	3.62533e-27	-1.52368	0.308	0.725	6.9512e-23	1.49671e-19	-1.35871	0.301	0.646	2.86978e-15	1.49671e-19	7.25065e-27
Gmnn	4.19363e-27	0.51075	0.955	0.622	8.04087e-23	2.19324e-21	0.437898	0.895	0.593	4.20533e-17	2.19324e-21	8.38727e-27
Tspan18	1.67024e-17	0.288123	0.767	0.459	3.20252e-13	8.5603e-27	0.36885	0.805	0.399	1.64135e-22	1.67024e-17	1.71206e-26
Pdgfa	9.51776e-27	0.547214	0.955	0.795	1.82493e-22	8.03864e-15	0.33258	0.925	0.794	1.54133e-10	8.03864e-15	1.90355e-26
Meis2	1.04266e-26	-0.710286	0.902	0.932	1.9992e-22	1.89315e-11	-0.53351	0.91	0.858	3.62992e-07	1.89315e-11	2.08532e-26
Lamb1	1.20429e-26	0.466922	0.962	0.593	2.30911e-22	9.52448e-23	0.377125	0.932	0.656	1.82622e-18	9.52448e-23	2.40858e-26
Ppa1	1.27666e-26	0.419874	0.977	0.924	2.44786e-22	4.01365e-18	0.343021	0.985	0.887	7.69576e-14	4.01365e-18	2.55331e-26
Capn6	2.46019e-26	-0.608021	0.541	0.852	4.71716e-22	3.76611e-19	-0.571028	0.481	0.763	7.22114e-15	3.76611e-19	4.92037e-26
Ranbp1	2.7379e-26	0.426932	0.992	0.989	5.24964e-22	4.93973e-20	0.35676	1	0.978	9.47144e-16	4.93973e-20	5.47579e-26
Mfap4	3.5292e-26	-0.590937	0.429	0.774	6.76689e-22	3.421e-15	-0.416034	0.331	0.642	6.55942e-11	3.421e-15	7.0584e-26
H19	5.14306e-25	0.564665	0.985	0.903	9.86131e-21	1.02801e-25	0.675338	0.97	0.782	1.97111e-21	5.14306e-25	2.05602e-25
Spock2	2.71502e-25	-0.70216	0.586	0.83	5.20579e-21	1.12483e-10	-0.481589	0.609	0.715	2.15676e-06	1.12483e-10	5.43005e-25
Crym	2.82155e-25	-0.730483	0.263	0.712	5.41005e-21	5.35951e-18	-0.650692	0.271	0.626	1.02763e-13	5.35951e-18	5.64311e-25
Scx	5.11141e-25	-0.455397	0.15	0.616	9.80062e-21	5.21758e-17	-0.416295	0.195	0.544	1.00042e-12	5.21758e-17	1.02228e-24
H2afv	6.14534e-25	0.379574	1	0.994	1.17831e-20	6.1798e-22	0.380673	1	0.992	1.18491e-17	6.1798e-22	1.22907e-24
Plxnd1	8.14044e-25	0.260541	0.586	0.201	1.56085e-20	1.1093e-21	0.260409	0.519	0.184	2.12697e-17	1.1093e-21	1.62809e-24
Ptma	8.80429e-25	0.288354	1	1	1.68814e-20	3.5666e-19	0.256794	1	1	6.83859e-15	3.5666e-19	1.76086e-24
Alyref	1.18121e-24	0.336289	0.985	0.919	2.26486e-20	1.56396e-17	0.32716	0.992	0.865	2.99873e-13	1.56396e-17	2.36243e-24
Kif26b	1.31567e-24	-0.456536	0.233	0.666	2.52267e-20	1.76243e-14	-0.378354	0.286	0.573	3.37929e-10	1.76243e-14	2.63135e-24
Id1	1.38403e-24	0.655054	0.917	0.664	2.65373e-20	4.3326e-21	0.595917	0.962	0.701	8.30732e-17	4.3326e-21	2.76805e-24
Sox11	1.94266e-24	0.529591	0.985	0.962	3.72485e-20	4.05212e-19	0.483051	0.992	0.947	7.76954e-15	4.05212e-19	3.88531e-24
Tuba1b	2.17368e-24	0.426928	0.992	0.989	4.16782e-20	9.40589e-17	0.349039	1	0.99	1.80349e-12	9.40589e-17	4.34737e-24
Scube3	1.09571e-23	0.328269	0.654	0.256	2.10091e-19	3.11076e-24	0.319668	0.654	0.251	5.96457e-20	1.09571e-23	6.22152e-24
Usp1	3.48107e-24	0.381704	0.977	0.796	6.67461e-20	3.60467e-18	0.334175	0.94	0.745	6.91159e-14	3.60467e-18	6.96214e-24
Ndufa12	4.27139e-24	0.332729	0.992	0.979	8.18997e-20	1.32204e-23	0.337442	1	0.972	2.53488e-19	1.32204e-23	8.54279e-24
Abhd16a	5.84344e-24	0.428492	0.887	0.616	1.12042e-19	6.47598e-18	0.322905	0.805	0.559	1.2417e-13	6.47598e-18	1.16869e-23
Birc5	5.93389e-24	0.604106	0.97	0.614	1.13776e-19	1.32147e-14	0.42549	0.887	0.588	2.53379e-10	1.32147e-14	1.18678e-23
Gpc3	6.40112e-24	-0.51873	0.947	0.978	1.22735e-19	5.74029e-07	-0.277392	0.977	0.975	0.0110064	5.74029e-07	1.28022e-23
Psip1	8.15641e-24	0.33422	0.992	0.965	1.56391e-19	3.4615e-21	0.358336	1	0.954	6.63709e-17	3.4615e-21	1.63128e-23
Cdh11	1.33937e-23	-0.607596	0.594	0.829	2.56811e-19	7.05354e-12	-0.443209	0.534	0.722	1.35245e-07	7.05354e-12	2.67875e-23
Hmgb2	1.84967e-23	0.604045	1	0.965	3.54655e-19	4.34168e-19	0.5363	1	0.961	8.32474e-15	4.34168e-19	3.69933e-23
Hmgb1	2.06678e-23	0.337248	1	1	3.96284e-19	8.3368e-19	0.328348	1	1	1.5985e-14	8.3368e-19	4.13355e-23
Hmgn2	4.34811e-23	0.385951	1	0.993	8.33707e-19	3.26538e-16	0.343089	1	0.977	6.26104e-12	3.26538e-16	8.69623e-23
Ddah2	4.95642e-23	0.453327	1	0.972	9.50344e-19	5.04452e-19	0.371683	0.992	0.964	9.67237e-15	5.04452e-19	9.91284e-23
Smc2	5.545e-23	0.470541	0.97	0.72	1.0632e-18	7.39395e-14	0.370227	0.925	0.677	1.41772e-09	7.39395e-14	1.109e-22
Lamc1	5.97897e-23	0.397655	0.91	0.695	1.14641e-18	1.02011e-19	0.375268	0.887	0.659	1.95595e-15	1.02011e-19	1.19579e-22
Srsf2	6.37706e-23	0.317064	1	0.993	1.22274e-18	8.70782e-14	0.263165	0.992	0.978	1.66964e-09	8.70782e-14	1.27541e-22
Pdgfc	6.99741e-23	-0.392103	0.233	0.662	1.34168e-18	1.02099e-12	-0.316014	0.353	0.628	1.95764e-08	1.02099e-12	1.39948e-22
Bambi	7.17939e-23	0.364834	0.737	0.371	1.37658e-18	2.80278e-20	0.352487	0.669	0.344	5.37404e-16	2.80278e-20	1.43588e-22
Proser2	1.33347e-22	0.322334	0.714	0.336	2.5568e-18	8.21667e-22	0.294844	0.692	0.308	1.57546e-17	8.21667e-22	2.66695e-22
Wnt4	2.50748e-22	0.654737	0.88	0.499	4.80784e-18	9.16048e-18	0.468801	0.842	0.491	1.75643e-13	9.16048e-18	5.01495e-22
Ezh2	3.99368e-22	0.389661	0.985	0.898	7.65748e-18	7.25313e-14	0.283509	0.985	0.896	1.39072e-09	7.25313e-14	7.98735e-22
Ube2s	5.67057e-22	0.493412	1	0.981	1.08727e-17	1.03538e-15	0.416533	1	0.971	1.98523e-11	1.03538e-15	1.13411e-21
Srsf7	7.88583e-22	0.360379	1	0.978	1.51203e-17	1.24131e-11	0.254649	1	0.964	2.38009e-07	1.24131e-11	1.57717e-21
Rps26	2.25987e-21	-0.272819	1	1	4.33308e-17	1.43237e-19	-0.262766	1	1	2.74642e-15	1.43237e-19	4.51975e-21
Hnrnpd	2.40354e-21	0.323583	0.992	0.996	4.60855e-17	9.88816e-20	0.304846	1	0.994	1.89596e-15	9.88816e-20	4.80708e-21
Dnajc9	2.83155e-21	0.389617	0.97	0.816	5.42922e-17	2.17389e-14	0.321093	0.947	0.761	4.16822e-10	2.17389e-14	5.66311e-21
Dek	3.83728e-21	0.382136	0.992	0.981	7.35759e-17	6.82773e-16	0.33572	1	0.982	1.30915e-11	6.82773e-16	7.67455e-21
Hmcn1	5.05714e-21	-0.508726	0.414	0.747	9.69656e-17	1.15832e-12	-0.421072	0.406	0.653	2.22097e-08	1.15832e-12	1.01143e-20
Khdrbs3	8.43627e-21	0.365753	0.94	0.686	1.61757e-16	1.04674e-16	0.308791	0.917	0.655	2.00703e-12	1.04674e-16	1.68725e-20
Cycs	1.16966e-20	0.366911	0.992	0.898	2.2427e-16	9.48018e-14	0.2821	0.962	0.851	1.81773e-09	9.48018e-14	2.33931e-20
Mcm7	1.17608e-20	0.426455	0.977	0.911	2.25502e-16	2.26674e-13	0.376929	0.947	0.891	4.34624e-09	2.26674e-13	2.35217e-20
Ncs1	1.7577e-20	0.312835	0.774	0.436	3.37021e-16	3.83137e-16	0.258108	0.729	0.4	7.34626e-12	3.83137e-16	3.51539e-20
Rangap1	2.15555e-20	0.385407	0.947	0.608	4.13306e-16	7.97266e-11	0.269009	0.797	0.559	1.52868e-06	7.97266e-11	4.31111e-20
Hoxa10	2.46216e-20	-0.434195	0.872	0.949	4.72095e-16	3.04431e-13	-0.373779	0.835	0.914	5.83717e-09	3.04431e-13	4.92432e-20
S100a16	2.71067e-20	0.383083	0.857	0.519	5.19744e-16	7.56891e-14	0.278765	0.85	0.552	1.45126e-09	7.56891e-14	5.42134e-20
Tubb4b	6.28167e-20	0.523025	0.992	0.86	1.20445e-15	1.09779e-11	0.41499	0.962	0.825	2.1049e-07	1.09779e-11	1.25633e-19
Zbtb20	6.72594e-20	-0.508403	0.782	0.93	1.28963e-15	9.99555e-10	-0.382613	0.857	0.882	1.91655e-05	9.99555e-10	1.34519e-19
Traf1	1.19819e-19	-0.431845	0.098	0.51	2.29742e-15	4.36725e-15	-0.459794	0.105	0.442	8.37377e-11	4.36725e-15	2.39639e-19
Emp3	1.82584e-19	-0.512562	0.368	0.7	3.50086e-15	3.41163e-14	-0.435156	0.383	0.649	6.54146e-10	3.41163e-14	3.65167e-19
Plat	2.35399e-19	0.570916	0.835	0.595	4.51355e-15	1.88833e-19	0.433984	0.827	0.461	3.62068e-15	2.35399e-19	3.77665e-19
Manf	2.45906e-19	0.370579	0.977	0.921	4.71499e-15	6.7092e-13	0.30054	0.985	0.878	1.28642e-08	6.7092e-13	4.91811e-19
Tuba1a	4.19444e-18	0.455279	0.985	0.933	8.04242e-14	3.05959e-19	0.419878	1	0.875	5.86645e-15	4.19444e-18	6.11917e-19
Selenow	5.05652e-19	-0.293273	0.985	1	9.69538e-15	1.78412e-17	-0.294697	1	0.998	3.42087e-13	1.78412e-17	1.0113e-18
Itga8	5.73615e-19	-0.354096	0.195	0.597	1.09985e-14	1.29856e-09	-0.265786	0.248	0.48	2.48987e-05	1.29856e-09	1.14723e-18
Cenpk	6.40689e-19	0.272681	0.88	0.51	1.22846e-14	5.2826e-14	0.269439	0.805	0.507	1.01289e-09	5.2826e-14	1.28138e-18
Snap91	6.47031e-19	-0.35477	0.173	0.589	1.24062e-14	2.0037e-09	-0.289115	0.293	0.525	3.84189e-05	2.0037e-09	1.29406e-18
Pbk	6.80649e-19	0.352212	0.835	0.462	1.30508e-14	2.31293e-14	0.332164	0.767	0.45	4.43481e-10	2.31293e-14	1.3613e-18
Nme1	1.52996e-18	0.323544	1	0.996	2.93354e-14	7.19373e-19	0.312277	1	0.993	1.37933e-14	1.52996e-18	1.43875e-18
Fabp5	8.64129e-19	0.521978	0.962	0.955	1.65688e-14	5.15805e-10	0.352485	0.962	0.936	9.89005e-06	5.15805e-10	1.72826e-18
Anp32e	8.85173e-19	0.352972	0.977	0.923	1.69723e-14	8.91223e-18	0.357944	1	0.904	1.70883e-13	8.91223e-18	1.77035e-18
Tubb5	1.67546e-18	0.318427	1	1	3.21253e-14	1.28647e-18	0.343833	1	1	2.46667e-14	1.67546e-18	2.57294e-18
Mad2l1	1.29621e-18	0.286573	0.835	0.47	2.48535e-14	2.0491e-12	0.258753	0.707	0.444	3.92894e-08	2.0491e-12	2.59242e-18
Decr1	6.52907e-16	0.310898	0.857	0.627	1.25188e-11	1.44952e-18	0.369912	0.887	0.634	2.7793e-14	6.52907e-16	2.89903e-18
Ramp2	1.50059e-18	-0.483462	0.669	0.896	2.87724e-14	9.18501e-06	-0.286038	0.744	0.818	0.176113	9.18501e-06	3.00119e-18
Fam213a	1.86891e-18	-0.563514	0.692	0.831	3.58346e-14	2.65053e-06	-0.366975	0.737	0.79	0.0508213	2.65053e-06	3.73783e-18
Arhgef12	6.76361e-11	0.264432	0.917	0.765	1.29685e-06	2.07107e-18	0.335953	0.902	0.697	3.97108e-14	6.76361e-11	4.14215e-18
Lsm2	2.34311e-18	0.312003	0.97	0.876	4.49268e-14	4.10572e-11	0.264016	0.985	0.828	7.87231e-07	4.10572e-11	4.68622e-18
Gja1	2.37446e-18	0.350613	0.88	0.575	4.55279e-14	3.69803e-18	0.330079	0.842	0.533	7.0906e-14	3.69803e-18	4.74892e-18
H2afy2	3.64617e-18	0.272673	0.992	0.922	6.99117e-14	5.80975e-13	0.260292	0.97	0.865	1.11396e-08	5.80975e-13	7.29235e-18
Spc24	4.4557e-18	0.348048	0.962	0.641	8.54335e-14	2.03276e-16	0.393399	0.917	0.593	3.89761e-12	2.03276e-16	8.91139e-18
Cnn3	5.17271e-18	0.296105	0.985	0.933	9.91816e-14	7.98464e-15	0.334961	0.955	0.874	1.53098e-10	7.98464e-15	1.03454e-17
Robo2	5.1924e-18	-0.607698	0.541	0.79	9.95591e-14	5.67844e-07	-0.454322	0.617	0.704	0.0108878	5.67844e-07	1.03848e-17
Cdh4	6.78601e-18	0.309834	0.835	0.508	1.30115e-13	2.80759e-12	0.271854	0.707	0.45	5.38328e-08	2.80759e-12	1.3572e-17
Chd3	6.92476e-18	-0.397987	0.744	0.889	1.32775e-13	9.40063e-08	-0.258886	0.752	0.867	0.00180248	9.40063e-08	1.38495e-17
Wsb1	9.78881e-16	0.371771	0.887	0.695	1.87691e-11	7.81944e-18	0.355864	0.857	0.611	1.4993e-13	9.78881e-16	1.56389e-17
Fdps	7.83442e-18	0.42416	0.91	0.712	1.50217e-13	4.64687e-15	0.320639	0.857	0.597	8.90991e-11	4.64687e-15	1.56688e-17
Cdca8	1.25952e-17	0.429375	0.925	0.595	2.41501e-13	1.69252e-09	0.357131	0.812	0.563	3.24524e-05	1.69252e-09	2.51904e-17
Tril	1.35057e-17	-0.544229	0.534	0.774	2.58958e-13	1.29045e-06	-0.36403	0.571	0.66	0.0247431	1.29045e-06	2.70113e-17
H1fx	1.70967e-17	0.406504	1	0.949	3.27811e-13	7.04176e-12	0.330586	0.985	0.913	1.35019e-07	7.04176e-12	3.41933e-17
Tmpo	1.78234e-17	0.319133	0.985	0.924	3.41745e-13	1.5647e-14	0.309528	0.992	0.891	3.00015e-10	1.5647e-14	3.56467e-17
Smarca5	7.15291e-15	0.255947	1	0.983	1.3715e-10	2.73958e-17	0.318803	0.992	0.978	5.25288e-13	7.15291e-15	5.47916e-17
Hist1h1b	2.90865e-17	0.774081	0.91	0.66	5.57705e-13	5.62993e-11	0.658225	0.857	0.642	1.07948e-06	5.62993e-11	5.8173e-17
Fzd2	7.3853e-17	-0.41762	0.714	0.865	1.41606e-12	3.55792e-17	-0.478064	0.647	0.835	6.82196e-13	7.3853e-17	7.11584e-17
Ccdc25	4.26532e-17	0.346359	0.857	0.607	8.17832e-13	3.10922e-16	0.328616	0.774	0.47	5.96162e-12	3.10922e-16	8.53063e-17
Vim	4.27511e-17	-0.554858	0.767	0.913	8.19709e-13	9.7994e-10	-0.352052	0.82	0.878	1.87894e-05	9.7994e-10	8.55022e-17
Snrpd1	5.30059e-17	0.258421	1	0.993	1.01634e-12	5.79356e-16	0.257772	1	0.989	1.11086e-11	5.79356e-16	1.06012e-16
Peg3	7.65421e-17	-0.636571	0.752	0.883	1.46762e-12	0.000163988	-0.403638	0.759	0.811	1	0.000163988	1.53084e-16
Malat1	1.43426e-16	-0.472306	1	1	2.75005e-12	2.40851e-13	-0.390555	1	1	4.61808e-09	2.40851e-13	2.86852e-16
Snrpa1	2.8744e-16	0.284904	1	0.928	5.51138e-12	2.94566e-12	0.271612	0.955	0.872	5.648e-08	2.94566e-12	5.74881e-16
AC160336.1	4.4643e-16	0.420255	0.985	0.909	8.55984e-12	2.27026e-06	0.279126	0.917	0.884	0.04353	2.27026e-06	8.92859e-16
Dut	6.80235e-16	0.35277	0.97	0.966	1.30428e-11	4.4801e-16	0.365616	0.977	0.939	8.59014e-12	6.80235e-16	8.96019e-16
Bcam	1.00733e-12	0.314119	0.925	0.734	1.93146e-08	5.03997e-16	0.360015	0.857	0.651	9.66364e-12	1.00733e-12	1.00799e-15
Cmtm7	5.13559e-16	0.298751	0.842	0.599	9.84698e-12	4.13606e-12	0.265182	0.85	0.626	7.93049e-08	4.13606e-12	1.02712e-15
Ctnna1	2.19634e-14	0.316894	0.97	0.893	4.21126e-10	5.14207e-16	0.369921	0.947	0.885	9.85941e-12	2.19634e-14	1.02841e-15
Ccna2	5.21587e-16	0.351622	0.842	0.503	1.00009e-11	5.67181e-11	0.340101	0.744	0.473	1.08751e-06	5.67181e-11	1.04317e-15
Cdk1	5.80279e-16	0.440522	0.94	0.638	1.11263e-11	5.18883e-12	0.384418	0.865	0.604	9.94906e-08	5.18883e-12	1.16056e-15
Rrm1	6.8346e-16	0.277398	0.947	0.713	1.31047e-11	1.15588e-12	0.263686	0.887	0.691	2.21629e-08	1.15588e-12	1.36692e-15
H2-Ab1	2.23855e-14	0.281247	0.707	0.411	4.2922e-10	9.32806e-16	0.341851	0.752	0.403	1.78856e-11	2.23855e-14	1.86561e-15
Crip2	1.42227e-15	0.328404	0.94	0.749	2.72707e-11	8.37862e-14	0.298778	0.857	0.613	1.60652e-09	8.37862e-14	2.84455e-15
Dach1	2.87832e-15	0.290743	0.82	0.535	5.51888e-11	3.15375e-11	0.254017	0.805	0.57	6.047e-07	3.15375e-11	5.75663e-15
Atad2	3.382e-15	0.389586	0.865	0.627	6.48465e-11	1.04925e-11	0.371946	0.805	0.56	2.01184e-07	1.04925e-11	6.764e-15
Arid5b	4.48804e-15	-0.316643	0.504	0.809	8.60538e-11	2.84131e-12	-0.299847	0.579	0.791	5.44792e-08	2.84131e-12	8.97609e-15
Itm2b	6.25434e-15	-0.3035	0.992	0.992	1.19921e-10	8.86157e-15	-0.350797	0.985	0.985	1.69912e-10	8.86157e-15	1.25087e-14
Jarid2	1.7441e-12	0.263842	0.85	0.625	3.34414e-08	6.60968e-15	0.333278	0.82	0.597	1.26734e-10	1.7441e-12	1.32194e-14
Serpinf1	7.48069e-15	-0.308907	0.444	0.772	1.43435e-10	1.27915e-09	-0.277291	0.429	0.626	2.45265e-05	1.27915e-09	1.49614e-14
Rfc4	7.94054e-15	0.297617	0.917	0.744	1.52252e-10	8.33925e-14	0.304534	0.895	0.702	1.59897e-09	8.33925e-14	1.58811e-14
Top2a	8.73506e-15	0.464304	0.94	0.627	1.67486e-10	1.86984e-10	0.403223	0.865	0.619	3.58523e-06	1.86984e-10	1.74701e-14
Lsm3	2.47681e-14	0.275924	0.962	0.906	4.74904e-10	1.22443e-14	0.278897	0.97	0.882	2.34772e-10	2.47681e-14	2.44886e-14
Mfap2	1.24341e-14	-0.359944	0.722	0.836	2.38412e-10	6.60098e-08	-0.261687	0.639	0.733	0.00126567	6.60098e-08	2.48683e-14
Hoxb4	1.58316e-14	-0.318944	0.571	0.792	3.03555e-10	1.01573e-11	-0.328434	0.579	0.769	1.94755e-07	1.01573e-11	3.16632e-14
Smc4	1.75529e-14	0.37669	0.955	0.796	3.36559e-10	1.25058e-10	0.351307	0.925	0.764	2.39786e-06	1.25058e-10	3.51058e-14
Nxn	8.02655e-12	0.261824	0.887	0.701	1.53901e-07	2.09768e-14	0.307789	0.887	0.663	4.02209e-10	8.02655e-12	4.19536e-14
Clspn	8.66517e-13	0.306947	0.789	0.495	1.66146e-08	3.20729e-14	0.276889	0.782	0.456	6.14966e-10	8.66517e-13	6.41458e-14
Hells	3.29267e-14	0.365641	0.865	0.639	6.31336e-10	2.55438e-10	0.301761	0.812	0.596	4.89776e-06	2.55438e-10	6.58533e-14
Tmem100	1.35822e-12	0.444036	0.714	0.468	2.60426e-08	3.89043e-14	0.492184	0.654	0.4	7.45951e-10	1.35822e-12	7.78086e-14
Cenpa	3.94707e-14	0.469881	0.88	0.555	7.56812e-10	4.77575e-10	0.421036	0.774	0.543	9.15702e-06	4.77575e-10	7.89415e-14
Uhrf1	4.17568e-14	0.309972	0.887	0.626	8.00645e-10	1.39698e-12	0.304722	0.85	0.571	2.67857e-08	1.39698e-12	8.35136e-14
Hist1h2ap	5.88589e-14	0.616075	0.992	0.904	1.12856e-09	4.60342e-09	0.483106	0.917	0.783	8.8266e-05	4.60342e-09	1.17718e-13
Myo6	9.39438e-14	0.288151	0.827	0.596	1.80128e-09	1.8193e-12	0.28916	0.917	0.672	3.48833e-08	1.8193e-12	1.87888e-13
Mcm3	2.39221e-13	0.378813	0.91	0.763	4.58682e-09	1.33728e-13	0.304246	0.91	0.695	2.56409e-09	2.39221e-13	2.67455e-13
Mki67	1.5321e-13	0.358165	0.91	0.591	2.93764e-09	4.07144e-08	0.328391	0.782	0.553	0.000780658	4.07144e-08	3.0642e-13
Dhfr	6.66463e-13	0.323808	0.827	0.597	1.27788e-08	2.02807e-13	0.309443	0.812	0.563	3.88862e-09	6.66463e-13	4.05614e-13
Spc25	2.89005e-13	0.336028	0.88	0.615	5.54139e-09	1.98372e-06	0.295587	0.782	0.619	0.0380358	1.98372e-06	5.78011e-13
Ckb	3.23012e-13	-0.368306	0.331	0.594	6.19343e-09	4.02116e-07	-0.26961	0.271	0.47	0.00771018	4.02116e-07	6.46024e-13
Nucks1	5.0274e-13	0.272553	1	0.973	9.63954e-09	2.87101e-12	0.297258	1	0.954	5.50488e-08	2.87101e-12	1.00548e-12
Rspo3	5.10674e-13	-0.409781	0.105	0.41	9.79166e-09	2.95787e-12	-0.402616	0.075	0.372	5.67141e-08	2.95787e-12	1.02135e-12
Ypel3	5.5829e-13	-0.277421	0.647	0.809	1.07047e-08	2.06497e-10	-0.251946	0.639	0.816	3.95937e-06	2.06497e-10	1.11658e-12
Prc1	6.18991e-13	0.386604	0.759	0.424	1.18685e-08	8.34e-10	0.364435	0.692	0.432	1.59911e-05	8.34e-10	1.23798e-12
Tyms	7.85194e-13	0.35438	0.94	0.741	1.50553e-08	2.10148e-12	0.27548	0.917	0.686	4.02937e-08	2.10148e-12	1.57039e-12
Hist1h1e	1.05177e-12	0.473913	0.932	0.779	2.01665e-08	8.19331e-07	0.322683	0.887	0.787	0.0157099	8.19331e-07	2.10353e-12
H2afx	1.72363e-12	0.362141	0.977	0.858	3.30489e-08	8.85669e-10	0.323497	0.955	0.827	1.69818e-05	8.85669e-10	3.44727e-12
Calm2	2.1536e-12	0.298027	1	0.999	4.12932e-08	1.07376e-09	0.27835	1	0.993	2.05883e-05	1.07376e-09	4.3072e-12
Lgals1	2.57567e-12	-0.695928	0.594	0.751	4.9386e-08	6.97892e-10	-0.607894	0.504	0.664	1.33814e-05	6.97892e-10	5.15135e-12
Rcn1	2.76959e-12	0.319194	0.947	0.872	5.31041e-08	3.28331e-12	0.314696	0.955	0.853	6.29542e-08	3.28331e-12	5.53918e-12
Cyba	5.71402e-11	-0.346549	0.752	0.868	1.09561e-06	4.25062e-12	-0.454894	0.782	0.841	8.15014e-08	5.71402e-11	8.50124e-12
Epb41l4aos	1.84717e-11	-0.284974	0.669	0.839	3.54177e-07	7.87213e-12	-0.341023	0.707	0.811	1.5094e-07	1.84717e-11	1.57443e-11
Hist1h2ae	8.24563e-12	0.644058	0.865	0.693	1.58102e-07	2.47203e-06	0.499767	0.752	0.649	0.0473987	2.47203e-06	1.64913e-11
Tipin	9.02458e-12	0.277947	0.902	0.771	1.73037e-07	1.84145e-11	0.285413	0.925	0.726	3.53079e-07	1.84145e-11	1.80492e-11
Meox1	1.33135e-11	-0.26327	0.075	0.362	2.55273e-07	2.0992e-07	-0.303096	0.158	0.359	0.00402501	2.0992e-07	2.6627e-11
Il33	2.48923e-11	-0.290545	0.068	0.351	4.77285e-07	3.69549e-10	-0.364881	0.12	0.392	7.08574e-06	3.69549e-10	4.97846e-11
Slc1a3	1.56525e-10	-0.252934	0.218	0.494	3.00121e-06	2.67254e-11	-0.278286	0.203	0.482	5.12433e-07	1.56525e-10	5.34508e-11
Sox4	3.45404e-11	-0.319985	0.985	0.98	6.62277e-07	1.2522e-05	-0.257859	0.962	0.972	0.240097	1.2522e-05	6.90807e-11
Dnmt1	4.58616e-11	0.275213	0.91	0.71	8.79349e-07	8.23934e-10	0.277007	0.88	0.672	1.57981e-05	8.23934e-10	9.17231e-11
Cenpe	8.55638e-11	0.315422	0.865	0.571	1.6406e-06	2.63609e-09	0.38007	0.737	0.508	5.05444e-05	2.63609e-09	1.71128e-10
Cenpf	1.33108e-10	0.381308	0.895	0.59	2.55222e-06	3.18889e-06	0.310384	0.767	0.556	0.0611438	3.18889e-06	2.66216e-10
Ppp1r14a	1.96613e-10	-0.266328	0.18	0.433	3.76986e-06	5.59713e-06	-0.298615	0.376	0.503	0.107319	5.59713e-06	3.93227e-10
Ccnb2	2.38473e-10	0.325552	0.805	0.555	4.57249e-06	2.52937e-10	0.356027	0.782	0.512	4.84982e-06	2.52937e-10	4.76947e-10
Racgap1	3.69723e-10	0.26733	0.752	0.477	7.08907e-06	1.78423e-09	0.285023	0.714	0.468	3.42108e-05	1.78423e-09	7.39446e-10
Tpx2	3.75982e-10	0.369591	0.767	0.522	7.20908e-06	4.98838e-07	0.287798	0.669	0.503	0.00956472	4.98838e-07	7.51964e-10
Espn	4.3875e-10	-0.306374	0.586	0.765	8.4126e-06	1.32154e-05	-0.256702	0.534	0.65	0.253392	1.32154e-05	8.775e-10
Snhg12	5.90736e-10	-0.281979	0.684	0.83	1.13268e-05	2.03723e-08	-0.253976	0.617	0.744	0.000390618	2.03723e-08	1.18147e-09
Uncx	9.59373e-09	0.37356	0.955	0.898	0.00018395	9.33509e-10	0.422046	0.955	0.864	1.78991e-05	9.59373e-09	1.86702e-09
Cdc20	1.81828e-09	0.471403	0.752	0.531	3.48638e-05	5.70049e-05	0.251242	0.707	0.524	1	5.70049e-05	3.63657e-09
Hist1h4d	2.04241e-09	0.364815	0.767	0.58	3.91611e-05	0.000193204	0.285201	0.677	0.571	1	0.000193204	4.08481e-09
Nusap1	2.75809e-09	0.301427	0.752	0.464	5.28837e-05	0.000168925	0.25888	0.617	0.461	1	0.000168925	5.51619e-09
Ccnb1	3.12909e-09	0.397249	0.699	0.462	5.99971e-05	2.90104e-08	0.277326	0.684	0.432	0.000556245	2.90104e-08	6.25817e-09
Lig1	1.7337e-08	0.291661	0.85	0.688	0.000332419	6.48266e-09	0.335204	0.835	0.666	0.000124299	1.7337e-08	1.29653e-08
Golim4	5.11437e-07	0.266399	0.842	0.679	0.00980629	3.31566e-08	0.252766	0.812	0.618	0.000635745	5.11437e-07	6.63133e-08
Tmsb4x	5.432e-08	-1.00573	0.985	0.972	0.00104153	5.60801e-06	-0.828071	0.947	0.966	0.107528	5.60801e-06	1.0864e-07
Igfbp2	8.93081e-07	-0.279802	0.789	0.889	0.0171239	3.2412e-07	-0.332508	0.647	0.76	0.00621468	8.93081e-07	6.4824e-07
Rbp1	1.5003e-05	0.327259	1	0.988	0.287667	5.15009e-07	0.457354	0.992	0.925	0.00987479	1.5003e-05	1.03002e-06
Ube2c	6.65984e-07	0.466751	0.842	0.674	0.0127696	0.000264424	0.402925	0.782	0.649	1	0.000264424	1.33197e-06
Mecom	5.21001e-05	-0.285326	0.15	0.3	0.998968	2.17638e-06	-0.35783	0.18	0.36	0.0417299	5.21001e-05	4.35276e-06
Junb	2.62776e-06	-0.37708	0.579	0.687	0.0503846	9.7947e-05	-0.332793	0.632	0.732	1	9.7947e-05	5.25551e-06
Igfbp4	6.8335e-05	-0.267955	0.91	0.913	1	3.17389e-06	-0.253524	0.767	0.836	0.0608561	6.8335e-05	6.34776e-06
Cfh	2.59105e-05	-0.354746	0.158	0.311	0.496807	0.00132058	-0.321423	0.165	0.269	1	0.00132058	5.18202e-05
Dcn	9.19685e-05	-0.477001	0.293	0.431	1	0.0214647	-0.36642	0.18	0.251	1	0.0214647	0.000183928
Myl9	0.000130253	-0.45804	0.444	0.528	1	0.0117883	-0.347569	0.368	0.444	1	0.0117883	0.000260489
Col1a2	0.000457937	-0.799675	0.609	0.647	1	0.00183598	-0.674782	0.361	0.45	1	0.00183598	0.000915665
Meg3	0.000837838	-0.417686	0.338	0.431	1	0.000849558	-0.395178	0.188	0.302	1	0.000849558	0.00167498
Col3a1	0.0161524	-0.689294	0.534	0.53	1	0.00199538	-0.576978	0.308	0.392	1	0.0161524	0.00398677
Col1a1	0.00355713	-0.70169	0.571	0.59	1	0.0156387	-0.535606	0.368	0.417	1	0.0156387	0.00710161
Acta2	0.14078	-0.555896	0.684	0.671	1	0.0323563	-0.689475	0.511	0.598	1	0.14078	0.0636656
Penk	0.0725055	-0.597834	0.331	0.355	1	0.0439238	-0.519489	0.248	0.299	1	0.0725055	0.0859183

## Sheet: Tubule_progenitors.4.marker
Gene	Mutant_p_val	Mutant_avg_logFC	Mutant_pct.1	Mutant_pct.2	Mutant_p_val_adj	CTRL_p_val	CTRL_avg_logFC	CTRL_pct.1	CTRL_pct.2	CTRL_p_val_adj	max_pval	minimump_p_val
Clu	6.77e-45	1.16265	1	0.416	1.3e-40	4.98e-73	1.26909	1	0.455	9.55e-69	6.77e-45	9.96e-73
Calml4	1.75e-16	0.691402	0.595	0.232	3.35e-12	1.79e-39	1.26037	0.716	0.295	3.42e-35	1.75e-16	3.57e-39
Igfbp7	2.24e-29	0.854017	1	0.586	4.3e-25	1.47e-56	1.25871	1	0.647	2.82e-52	2.24e-29	2.95e-56
Npnt	3.56e-23	0.761807	0.734	0.294	6.83e-19	1.11e-69	1.18211	0.919	0.344	2.13e-65	3.56e-23	2.22e-69
Fxyd2	1.59e-17	1.09526	0.709	0.317	3.05e-13	9.75e-30	1.14806	0.77	0.428	1.87e-25	1.59e-17	1.95e-29
Mpc2	1.5e-28	0.841677	0.987	0.889	2.87e-24	9.87e-63	1.10399	1	0.873	1.89e-58	1.5e-28	1.97e-62
Stard10	1.34e-52	1.07891	0.975	0.343	2.57e-48	6.22e-79	1.08794	0.939	0.347	1.19e-74	1.34e-52	1.24e-78
Rab11a	4.91e-43	0.849258	1	0.764	9.41e-39	1.55e-66	1.04849	0.986	0.731	2.97e-62	4.91e-43	3.1e-66
Cdh6	2.37e-52	1.09813	0.975	0.329	4.54e-48	1.38e-76	0.980826	1	0.384	2.65e-72	2.37e-52	2.76e-76
Phgdh	1.43e-13	0.534393	0.987	0.986	2.75e-09	1.69e-38	0.957542	0.993	0.97	3.25e-34	1.43e-13	3.39e-38
Osr2	9.16e-47	0.99723	0.937	0.252	1.76e-42	8.68e-67	0.939959	0.905	0.249	1.66e-62	9.16e-47	1.74e-66
Tmem176b	9.79e-06	0.29528	0.949	0.94	0.187794	7.08e-35	0.924465	0.993	0.926	1.36e-30	9.79e-06	1.42e-34
Cyba	6.8e-20	0.784665	0.987	0.84	1.3e-15	3.46e-42	0.910903	0.973	0.81	6.63e-38	6.8e-20	6.91e-42
Dcdc2a	8.83e-74	0.72318	0.81	0.091	1.69e-69	3.43e-87	0.900255	0.932	0.199	6.57e-83	8.83e-74	6.85e-87
Ddah1	2.5e-33	0.757617	0.949	0.607	4.79e-29	5.97e-65	0.875655	0.973	0.594	1.15e-60	2.5e-33	1.19e-64
Cpn1	1.88e-55	0.548419	0.759	0.118	3.6e-51	4.68e-80	0.858993	0.851	0.18	8.97e-76	1.88e-55	9.36e-80
Vcam1	5.32e-39	0.376555	0.62	0.102	1.02e-34	1.57e-66	0.852738	0.662	0.102	3.01e-62	5.32e-39	3.13e-66
Prnp	3.17e-34	0.818227	0.823	0.265	6.07e-30	3.21e-38	0.842887	0.743	0.266	6.16e-34	3.17e-34	6.42e-38
Ggt1	1.62e-36	0.449609	0.62	0.105	3.1e-32	2.56e-40	0.82061	0.709	0.236	4.92e-36	1.62e-36	5.13e-40
Hes5	6.25e-43	0.871794	0.57	0.074	1.2e-38	6.84e-34	0.800682	0.439	0.085	1.31e-29	6.84e-34	1.25e-42
Rida	1.64e-12	0.548262	0.823	0.545	3.15e-08	2.18e-38	0.793068	0.939	0.599	4.19e-34	1.64e-12	4.37e-38
Adamts1	2.14e-23	0.559842	0.797	0.352	4.1e-19	9.73e-48	0.783059	0.858	0.345	1.87e-43	2.14e-23	1.95e-47
Atp1b1	1.6e-38	0.84261	0.937	0.356	3.06e-34	7.62e-48	0.777994	0.912	0.435	1.46e-43	1.6e-38	1.52e-47
Arl4c	1.07e-34	0.838308	0.949	0.454	2.05e-30	4.01e-43	0.773908	0.953	0.476	7.69e-39	1.07e-34	8.03e-43
1700011H14Rik	1.44e-69	0.513602	0.709	0.063	2.75e-65	2.71e-77	0.77302	0.838	0.153	5.2e-73	1.44e-69	5.42e-77
Dpp4	5.53e-66	0.676876	0.823	0.113	1.06e-61	1.7e-83	0.770741	0.872	0.188	3.26e-79	5.53e-66	3.4e-83
Ezr	1.31e-25	0.645909	1	0.788	2.52e-21	1.16e-46	0.75527	0.986	0.823	2.22e-42	1.31e-25	2.31e-46
Dkk1	3.52e-17	0.416401	0.481	0.125	6.75e-13	5.7e-22	0.730375	0.446	0.138	1.09e-17	3.52e-17	1.14e-21
Rab3ip	3.79e-43	0.917094	1	0.536	7.26e-39	2.93e-49	0.727131	0.953	0.557	5.62e-45	3.79e-43	5.86e-49
Mt1	1.39e-22	0.506626	0.709	0.253	2.67e-18	5.42e-15	0.706497	0.635	0.341	1.04e-10	5.42e-15	2.79e-22
Pcbd1	2.06e-29	0.609556	0.949	0.58	3.95e-25	1.19e-50	0.68861	0.966	0.576	2.28e-46	2.06e-29	2.38e-50
Hnf1b	3.94e-70	0.81128	0.949	0.16	7.56e-66	1.29e-76	0.680372	0.926	0.236	2.48e-72	3.94e-70	2.59e-76
Aldh1a2	1.2e-12	0.391571	0.962	0.762	2.3e-08	8.95e-28	0.65935	0.993	0.847	1.72e-23	1.2e-12	1.79e-27
Lhx1	4.29e-31	1.14865	0.949	0.355	8.22e-27	9.69e-24	0.658628	0.858	0.402	1.86e-19	9.69e-24	8.57e-31
Kif12	1.41e-74	0.525629	0.835	0.093	2.71e-70	1.44e-76	0.645154	0.892	0.199	2.76e-72	1.41e-74	2.87e-76
Lfng	7.95e-44	0.64446	0.823	0.194	1.52e-39	4.4e-48	0.637868	0.703	0.191	8.44e-44	7.95e-44	8.8e-48
Cpb2	1.96e-77	0.546322	0.684	0.048	3.75e-73	2.09e-67	0.633283	0.696	0.114	4.01e-63	2.09e-67	3.91e-77
Emx2	2.46e-67	0.917937	0.987	0.178	4.72e-63	8.4e-55	0.621409	0.851	0.228	1.61e-50	8.4e-55	4.92e-67
S100a10	3.25e-14	0.371771	0.975	0.713	6.23e-10	9.28e-33	0.601855	0.986	0.724	1.78e-28	3.25e-14	1.86e-32
Tubb4b	1.71e-19	0.708152	1	0.867	3.27e-15	2.02e-16	0.593024	0.966	0.822	3.88e-12	2.02e-16	3.41e-19
Esd	3.56e-15	0.335033	1	0.982	6.82e-11	1.8e-39	0.584103	1	0.953	3.46e-35	3.56e-15	3.61e-39
Glud1	2.14e-10	0.377699	0.937	0.782	4.1e-06	1.07e-33	0.580298	0.959	0.769	2.05e-29	2.14e-10	2.14e-33
Cotl1	1.25e-07	0.280376	0.873	0.76	0.00238976	1.31e-33	0.576988	0.932	0.685	2.51e-29	1.25e-07	2.62e-33
Clec18a	2.53e-38	0.788581	0.975	0.345	4.86e-34	1.18e-30	0.572888	0.784	0.344	2.26e-26	1.18e-30	5.07e-38
Cks2	7.33e-20	0.694928	1	0.737	1.4e-15	4.12e-21	0.562718	0.973	0.693	7.9e-17	7.33e-20	8.24e-21
Ube2c	3.41e-12	0.770212	0.911	0.678	6.54e-08	5.62e-14	0.558693	0.892	0.628	1.08e-09	3.41e-12	1.12e-13
Lgr4	9.78e-33	0.471115	0.873	0.31	1.87e-28	3.32e-53	0.557959	0.899	0.373	6.36e-49	9.78e-33	6.63e-53
Syne2	1.62e-21	0.437188	0.937	0.532	3.11e-17	1.86e-34	0.555416	0.926	0.515	3.56e-30	1.62e-21	3.71e-34
Ly6a	2.04e-30	0.580471	0.646	0.151	3.91e-26	4.14e-09	0.554811	0.426	0.216	7.94e-05	4.14e-09	4.08e-30
Enpp2	2.36e-25	0.35705	0.747	0.235	4.52e-21	4.54e-45	0.545531	0.75	0.24	8.71e-41	2.36e-25	9.09e-45
Emid1	1.12e-31	0.840365	0.987	0.541	2.16e-27	5.64e-22	0.542022	0.824	0.512	1.08e-17	5.64e-22	2.25e-31
Tmbim6	6.57e-05	0.261615	0.962	0.936	1	9.95e-26	0.541105	0.98	0.919	1.91e-21	6.57e-05	1.99e-25
Irx3	6.03e-41	0.509337	0.797	0.175	1.16e-36	1.12e-53	0.532298	0.77	0.193	2.14e-49	6.03e-41	2.23e-53
Folr1	5.93e-55	0.535704	0.582	0.055	1.14e-50	1.09e-66	0.530177	0.608	0.076	2.1e-62	5.93e-55	2.19e-66
Retreg1	8.72e-38	0.352623	0.797	0.183	1.67e-33	2.08e-62	0.528595	0.872	0.232	3.98e-58	8.72e-38	4.15e-62
Lama1	1.14e-46	0.589736	0.861	0.199	2.19e-42	4.65e-58	0.527915	0.872	0.238	8.92e-54	1.14e-46	9.3e-58
Ccdc34	2.56e-15	0.443604	1	0.95	4.92e-11	8.1e-35	0.525633	0.993	0.923	1.55e-30	2.56e-15	1.62e-34
Gpc4	3.63e-26	0.273301	0.608	0.148	6.97e-22	5.45e-58	0.524007	0.757	0.19	1.04e-53	3.63e-26	1.09e-57
Ivns1abp	1.81e-17	0.422571	0.949	0.791	3.48e-13	5.21e-33	0.522006	0.986	0.803	9.99e-29	1.81e-17	1.04e-32
Amn	7.81e-27	0.351333	0.354	0.043	1.5e-22	7.75e-60	0.517979	0.527	0.059	1.49e-55	7.81e-27	1.55e-59
Spink1	4.92e-17	0.332671	0.367	0.08	9.44e-13	7.68e-22	0.515033	0.372	0.095	1.47e-17	4.92e-17	1.54e-21
Mrps17	4.2e-07	0.256576	0.987	0.861	0.00805525	2.53e-26	0.504927	0.953	0.815	4.86e-22	4.2e-07	5.07e-26
Aldob	8e-28	0.571184	0.468	0.078	1.53e-23	3.67e-18	0.499656	0.432	0.144	7.04e-14	3.67e-18	1.6e-27
Car4	5.2e-74	0.797812	0.937	0.149	9.97e-70	1.63e-45	0.49832	0.682	0.178	3.13e-41	1.63e-45	1.04e-73
Dll1	3.56e-42	0.503425	0.608	0.09	6.83e-38	1.49e-40	0.494006	0.5	0.093	2.86e-36	1.49e-40	7.13e-42
Cndp2	2.63e-19	0.455114	0.873	0.465	5.05e-15	1.04e-29	0.492383	0.811	0.456	1.99e-25	2.63e-19	2.08e-29
Tst	1.16e-17	0.396949	0.835	0.448	2.22e-13	1.82e-35	0.485857	0.851	0.431	3.49e-31	1.16e-17	3.64e-35
Slc39a5	1.27e-29	0.350332	0.354	0.038	2.44e-25	2.21e-48	0.484975	0.466	0.06	4.25e-44	1.27e-29	4.43e-48
Pdzk1	9.71e-31	0.614273	0.468	0.071	1.86e-26	1.63e-44	0.484874	0.514	0.088	3.12e-40	9.71e-31	3.26e-44
Gipc2	1.81e-30	0.313154	0.367	0.04	3.47e-26	1.75e-52	0.483391	0.568	0.091	3.36e-48	1.81e-30	3.51e-52
Epha7	5.67e-35	0.497285	0.823	0.244	1.09e-30	3.02e-48	0.483161	0.77	0.236	5.79e-44	5.67e-35	6.04e-48
Cenpf	3.99e-12	0.45929	0.937	0.605	7.66e-08	1.69e-11	0.482104	0.824	0.543	3.24e-07	1.69e-11	7.99e-12
Vmp1	1.24e-24	0.492945	0.962	0.721	2.38e-20	1.4e-34	0.481725	0.959	0.683	2.68e-30	1.24e-24	2.79e-34
Sephs2	5.12e-14	0.256109	0.823	0.468	9.81e-10	5.16e-36	0.478642	0.878	0.493	9.89e-32	5.12e-14	1.03e-35
Lrpap1	0.000825697	0.346643	0.873	0.781	1	5.66e-11	0.478187	0.838	0.703	1.09e-06	0.000825697	1.13e-10
Cthrc1	2.11e-27	0.489882	0.633	0.162	4.05e-23	1.23e-35	0.47752	0.676	0.215	2.36e-31	2.11e-27	2.46e-35
Rcn1	5.37e-25	0.745041	1	0.872	1.03e-20	3.07e-10	0.477168	0.939	0.853	5.88e-06	3.07e-10	1.07e-24
Itga6	1.42e-24	0.478252	0.924	0.41	2.73e-20	2.42e-33	0.470794	0.872	0.445	4.64e-29	1.42e-24	4.83e-33
Palm	3.98e-20	0.432393	0.937	0.667	7.63e-16	1.19e-37	0.469639	0.946	0.642	2.29e-33	3.98e-20	2.39e-37
Frem2	8.77e-25	0.503444	0.835	0.335	1.68e-20	2.06e-44	0.466949	0.818	0.299	3.96e-40	8.77e-25	4.13e-44
Slc9a3r1	0.00010741	0.307656	0.797	0.675	1	4.7e-17	0.466155	0.764	0.541	9.01e-13	0.00010741	9.4e-17
Rbpms	2.01e-18	0.439318	0.975	0.717	3.85e-14	1.21e-20	0.46467	0.946	0.685	2.33e-16	2.01e-18	2.43e-20
Hdc	2.39e-27	0.323421	0.405	0.057	4.58e-23	6.36e-15	0.46368	0.277	0.074	1.22e-10	6.36e-15	4.78e-27
Sema3c	1.06e-15	0.350332	0.62	0.232	2.04e-11	7.68e-34	0.4595	0.736	0.281	1.47e-29	1.06e-15	1.54e-33
Myo6	7.86e-13	0.322587	0.949	0.599	1.51e-08	5.43e-30	0.456957	0.939	0.664	1.04e-25	7.86e-13	1.09e-29
Itga1	1.16e-20	0.261606	0.684	0.213	2.23e-16	5.04e-28	0.456014	0.689	0.251	9.67e-24	1.16e-20	1.01e-27
Clic4	2.66e-25	0.441472	0.962	0.613	5.1e-21	1.11e-32	0.455334	0.946	0.62	2.13e-28	2.66e-25	2.22e-32
Gcsh	3.65e-21	0.492194	1	0.887	7e-17	4.78e-26	0.455066	0.973	0.857	9.17e-22	3.65e-21	9.56e-26
Tmem27	1.54e-39	0.304024	0.544	0.072	2.95e-35	6.11e-64	0.454986	0.669	0.11	1.17e-59	1.54e-39	1.22e-63
Gng12	6.99e-16	0.334671	0.911	0.595	1.34e-11	5.67e-30	0.454373	0.905	0.611	1.09e-25	6.99e-16	1.13e-29
Nrarp	4.09e-41	0.519862	0.797	0.174	7.84e-37	6.98e-44	0.453208	0.682	0.183	1.34e-39	4.09e-41	1.4e-43
Cdk1	1.04e-17	0.558228	0.975	0.653	2e-13	4.69e-18	0.451627	0.905	0.593	9e-14	1.04e-17	9.39e-18
Ldhb	1.36e-26	0.664139	1	0.96	2.6e-22	1.41e-14	0.450998	0.986	0.948	2.7e-10	1.41e-14	2.71e-26
Steap2	2.31e-44	0.336798	0.696	0.12	4.42e-40	7.9e-72	0.440718	0.764	0.139	1.51e-67	2.31e-44	1.58e-71
Hacd4	1.13e-36	0.407866	0.81	0.226	2.17e-32	5.62e-45	0.44069	0.682	0.188	1.08e-40	1.13e-36	1.12e-44
Arl6ip1	8.04e-10	0.536251	0.962	0.836	1.54e-05	3.88e-07	0.440632	0.899	0.862	0.00743375	3.88e-07	1.61e-09
Rbm47	1.42e-44	0.255155	0.582	0.072	2.72e-40	2.5e-50	0.435601	0.669	0.148	4.79e-46	1.42e-44	5e-50
Ptpn13	1.9e-27	0.512935	0.924	0.472	3.65e-23	3.92e-30	0.433161	0.905	0.497	7.51e-26	1.9e-27	7.83e-30
Enpep	1.92e-28	0.355002	0.759	0.229	3.68e-24	1.88e-46	0.43218	0.77	0.228	3.6e-42	1.92e-28	3.76e-46
Psmd3	8.07e-17	0.379213	0.975	0.903	1.55e-12	7.66e-24	0.431068	0.953	0.872	1.47e-19	8.07e-17	1.53e-23
Jag1	1.72e-32	0.614694	0.861	0.286	3.3e-28	2.54e-29	0.431057	0.77	0.322	4.88e-25	2.54e-29	3.44e-32
Prss23	3.5e-45	0.77355	0.886	0.23	6.72e-41	6.94e-27	0.430928	0.662	0.251	1.33e-22	6.94e-27	7.01e-45
Acadl	7.33e-12	0.312326	0.949	0.729	1.41e-07	9.56e-25	0.428928	0.926	0.703	1.83e-20	7.33e-12	1.91e-24
2022-09-04	9.14e-25	0.413527	0.722	0.242	1.75e-20	5.05e-27	0.428551	0.696	0.269	9.68e-23	9.14e-25	1.01e-26
Csrp2	3.4e-18	0.419091	0.987	0.839	6.52e-14	2.14e-26	0.418283	0.98	0.805	4.1e-22	3.4e-18	4.28e-26
Wnt4	2.56e-11	0.562557	0.861	0.524	4.9e-07	0.00673909	0.412899	0.622	0.522	1	0.00673909	5.11e-11
Fut9	7.14e-38	0.339693	0.456	0.049	1.37e-33	7.29e-86	0.412616	0.649	0.055	1.4e-81	7.14e-38	1.46e-85
Eif5a	6.66e-20	0.393575	1	0.998	1.28e-15	5.22e-30	0.410507	1	0.998	1e-25	6.66e-20	1.04e-29
Atpif1	2.23e-19	0.329205	1	0.999	4.28e-15	6.5e-38	0.408741	1	0.999	1.25e-33	2.23e-19	1.3e-37
Park7	6.27e-20	0.364893	1	0.991	1.2e-15	1.35e-31	0.40127	1	0.988	2.59e-27	6.27e-20	2.7e-31
Hmgn5	8.87e-14	0.357984	0.937	0.688	1.7e-09	1.01e-22	0.396002	0.966	0.684	1.94e-18	8.87e-14	2.02e-22
Psma4	1.42e-12	0.263359	1	0.989	2.72e-08	2.27e-26	0.395247	1	0.965	4.35e-22	1.42e-12	4.54e-26
Fjx1	3e-15	0.303266	0.759	0.38	5.74e-11	2.42e-23	0.394465	0.716	0.343	4.64e-19	3e-15	4.84e-23
Gm266	3.18e-18	0.502474	0.987	0.945	6.09e-14	3.27e-13	0.393062	0.959	0.874	6.27e-09	3.27e-13	6.35e-18
Abcg2	1.72e-10	0.263332	0.823	0.511	3.31e-06	6.21e-27	0.392418	0.777	0.391	1.19e-22	1.72e-10	1.24e-26
Myo5b	4.03e-30	0.310234	0.747	0.206	7.73e-26	2.1e-41	0.389617	0.777	0.257	4.02e-37	4.03e-30	4.19e-41
Uqcc2	1.52e-14	0.361328	0.949	0.844	2.91e-10	1.67e-25	0.388598	0.966	0.802	3.21e-21	1.52e-14	3.35e-25
Gnai1	3.61e-19	0.513601	0.696	0.311	6.92e-15	7.36e-29	0.385855	0.736	0.327	1.41e-24	3.61e-19	1.47e-28
Birc5	2.02e-15	0.509542	0.987	0.634	3.87e-11	9.24e-13	0.384114	0.865	0.586	1.77e-08	9.24e-13	4.04e-15
Ly6e	1.54e-19	0.45839	0.823	0.452	2.96e-15	8.69e-20	0.383488	0.75	0.43	1.67e-15	1.54e-19	1.74e-19
Spint2	9.38e-23	0.426463	0.937	0.521	1.8e-18	7.78e-29	0.383231	0.932	0.531	1.49e-24	9.38e-23	1.56e-28
Hist1h2ap	1.22e-11	0.651107	0.975	0.911	2.34e-07	8.09e-10	0.380392	0.946	0.776	1.55e-05	8.09e-10	2.44e-11
Tuba4a	1.35e-38	0.357127	0.57	0.082	2.59e-34	2.12e-43	0.378896	0.595	0.125	4.07e-39	1.35e-38	4.24e-43
Cdc20	1.81e-11	0.47907	0.861	0.535	3.46e-07	5.35e-14	0.371863	0.818	0.502	1.03e-09	1.81e-11	1.07e-13
Smc4	4.86e-14	0.421689	0.987	0.802	9.33e-10	3.26e-14	0.37179	0.953	0.757	6.25e-10	4.86e-14	6.52e-14
Trps1	1.35e-10	0.270248	0.823	0.496	2.6e-06	3.81e-30	0.368758	0.878	0.475	7.31e-26	1.35e-10	7.63e-30
Top2a	1.82e-13	0.531482	0.975	0.643	3.49e-09	1.21e-10	0.368361	0.878	0.612	2.32e-06	1.21e-10	3.64e-13
Zfp91	8.41e-14	0.346368	0.987	0.928	1.61e-09	1.43e-20	0.364392	0.986	0.922	2.75e-16	8.41e-14	2.87e-20
Keg1	2.62e-29	0.328645	0.316	0.029	5.01e-25	3.51e-29	0.360212	0.399	0.08	6.74e-25	3.51e-29	5.23e-29
Smc2	2.36e-16	0.452521	1	0.733	4.53e-12	2.65e-16	0.357227	0.953	0.668	5.07e-12	2.65e-16	4.73e-16
Snx7	5.15e-41	0.387444	0.747	0.158	9.87e-37	2.65e-42	0.356852	0.588	0.133	5.09e-38	5.15e-41	5.31e-42
Hnf4a	1.37e-55	0.342368	0.519	0.038	2.62e-51	3.56e-72	0.354361	0.615	0.066	6.82e-68	1.37e-55	7.12e-72
Dnajc21	2.62e-11	0.272324	0.962	0.751	5.03e-07	5.97e-18	0.352606	0.939	0.702	1.14e-13	2.62e-11	1.19e-17
Cdca8	2.15e-15	0.467027	0.949	0.613	4.13e-11	7.12e-16	0.349937	0.885	0.547	1.37e-11	2.15e-15	1.42e-15
Tspan13	6.69e-19	0.347612	0.949	0.586	1.28e-14	1.49e-19	0.347056	0.858	0.527	2.86e-15	6.69e-19	2.98e-19
Tuba1c	6.73e-14	0.254597	0.734	0.334	1.29e-09	8.4e-19	0.340991	0.676	0.327	1.61e-14	6.73e-14	1.68e-18
Gmnn	1.06e-12	0.354569	0.949	0.643	2.04e-08	6.38e-20	0.34079	0.953	0.578	1.22e-15	1.06e-12	1.28e-19
Dbi	2.33e-18	0.394765	1	0.948	4.47e-14	4.48e-23	0.338018	0.993	0.927	8.6e-19	2.33e-18	8.97e-23
Pclaf	8.05e-12	0.43539	1	0.721	1.54e-07	4.28e-13	0.33679	0.98	0.653	8.21e-09	8.05e-12	8.56e-13
Smagp	2.04e-21	0.280521	0.797	0.297	3.9e-17	6e-26	0.334833	0.736	0.306	1.15e-21	2.04e-21	1.2e-25
Ccnb1	3.74e-14	0.475925	0.873	0.461	7.18e-10	1.82e-10	0.333959	0.696	0.426	3.49e-06	1.82e-10	7.49e-14
Cryz	2.61e-11	0.267684	0.823	0.443	5.01e-07	2.19e-21	0.330399	0.824	0.472	4.2e-17	2.61e-11	4.38e-21
Jpt1	5.16e-15	0.440776	1	0.951	9.89e-11	1.04e-12	0.328628	0.986	0.938	2e-08	1.04e-12	1.03e-14
Ccnb2	9.35e-09	0.305874	0.886	0.563	0.000179302	5.38e-11	0.326742	0.764	0.51	1.03e-06	9.35e-09	1.08e-10
Nme1	4.37e-16	0.407061	1	0.997	8.37e-12	8.48e-19	0.325241	1	0.993	1.63e-14	4.37e-16	1.7e-18
Ddx39	1.31e-15	0.386	0.975	0.82	2.51e-11	1.06e-18	0.324738	0.966	0.788	2.04e-14	1.31e-15	2.13e-18
Fermt1	7.96e-61	0.325962	0.506	0.029	1.53e-56	2.03e-47	0.324327	0.419	0.043	3.9e-43	2.03e-47	1.59e-60
Lsm2	3.88e-13	0.309765	1	0.879	7.44e-09	2.59e-18	0.323914	0.966	0.828	4.97e-14	3.88e-13	5.19e-18
Nusap1	3.02e-15	0.462066	0.911	0.467	5.78e-11	3.38e-10	0.321466	0.716	0.442	6.48e-06	3.38e-10	6.03e-15
Maf	5.7e-12	0.452985	0.684	0.358	1.09e-07	3.14e-14	0.320123	0.696	0.38	6.02e-10	5.7e-12	6.28e-14
Hmgb2	3.71e-16	0.589939	1	0.967	7.11e-12	1.75e-11	0.319953	1	0.96	3.36e-07	1.75e-11	7.42e-16
Cdca3	2.49e-15	0.440397	0.924	0.559	4.77e-11	5.14e-14	0.319523	0.811	0.506	9.86e-10	5.14e-14	4.97e-15
Ranbp1	2.47e-16	0.394832	1	0.989	4.73e-12	1.11e-14	0.319479	1	0.977	2.13e-10	1.11e-14	4.93e-16
Slc25a5	9.83e-15	0.33529	1	0.981	1.89e-10	8.16e-19	0.318678	1	0.969	1.56e-14	9.83e-15	1.63e-18
Oxr1	1.63e-14	0.294033	0.81	0.426	3.13e-10	1.03e-23	0.317953	0.811	0.418	1.97e-19	1.63e-14	2.06e-23
Kif23	7.11e-18	0.401143	0.899	0.426	1.36e-13	1.18e-15	0.317122	0.75	0.42	2.27e-11	1.18e-15	1.42e-17
Ndufs6	1.58e-09	0.281572	0.987	0.95	3.03e-05	2.76e-21	0.31404	0.98	0.941	5.29e-17	1.58e-09	5.52e-21
Nol7	4.83e-11	0.272829	0.975	0.925	9.27e-07	6.71e-20	0.312921	0.986	0.91	1.29e-15	4.83e-11	1.34e-19
Cyb5a	6.41e-09	0.363285	0.987	0.865	0.000122861	8.74e-11	0.311757	0.946	0.864	1.68e-06	6.41e-09	1.75e-10
Crb3	1.65e-45	0.305665	0.696	0.104	3.17e-41	2.58e-43	0.310821	0.696	0.169	4.94e-39	2.58e-43	3.3e-45
Chchd10	2.21e-21	0.525002	0.962	0.738	4.23e-17	2.57e-17	0.310092	0.932	0.723	4.93e-13	2.57e-17	4.41e-21
Lhx1os	2.59e-25	0.40282	0.747	0.228	4.97e-21	7.32e-17	0.308286	0.628	0.281	1.4e-12	7.32e-17	5.18e-25
Grb7	6.81e-46	0.320096	0.722	0.118	1.31e-41	6.99e-52	0.304605	0.716	0.153	1.34e-47	6.81e-46	1.4e-51
Tnfrsf12a	5.87e-25	0.390896	0.658	0.19	1.12e-20	9.38e-20	0.299969	0.507	0.188	1.8e-15	9.38e-20	1.17e-24
Prc1	1.97e-16	0.488728	0.886	0.433	3.77e-12	4.64e-12	0.299692	0.73	0.422	8.89e-08	4.64e-12	3.94e-16
Hmmr	2.49e-13	0.37898	0.81	0.403	4.78e-09	3.26e-12	0.298961	0.682	0.384	6.25e-08	3.26e-12	4.99e-13
Tyms	1.28e-13	0.398702	0.975	0.75	2.45e-09	1.41e-14	0.296833	0.953	0.676	2.71e-10	1.28e-13	2.83e-14
Epcam	1.57e-22	0.316704	0.962	0.415	3.01e-18	2.54e-27	0.295972	0.845	0.383	4.87e-23	1.57e-22	5.08e-27
Cks1b	5.41e-14	0.356855	1	0.918	1.04e-09	1.08e-12	0.29464	0.98	0.891	2.08e-08	1.08e-12	1.08e-13
Col18a1	4.69e-07	0.279657	0.899	0.618	0.00899849	4.88e-14	0.29336	0.851	0.552	9.35e-10	4.69e-07	9.75e-14
Tpd52	2.01e-18	0.425666	0.975	0.655	3.86e-14	1.13e-15	0.291958	0.878	0.632	2.17e-11	1.13e-15	4.03e-18
Emc6	1.87e-12	0.279515	0.975	0.929	3.59e-08	2.53e-20	0.29166	0.98	0.907	4.85e-16	1.87e-12	5.06e-20
Dctpp1	4.69e-15	0.339974	1	0.959	8.99e-11	1.23e-14	0.290812	0.986	0.953	2.36e-10	1.23e-14	9.37e-15
Eps8	1.71e-29	0.262444	0.532	0.1	3.27e-25	6.33e-44	0.290027	0.52	0.093	1.21e-39	1.71e-29	1.27e-43
Pter	2.63e-12	0.257376	0.532	0.201	5.05e-08	2.5e-31	0.287246	0.601	0.188	4.79e-27	2.63e-12	5e-31
Hsp90aa1	3.56e-17	0.374004	1	1	6.82e-13	8.8e-19	0.287237	1	0.999	1.69e-14	3.56e-17	1.76e-18
Fchsd2	5.06e-16	0.265256	0.81	0.396	9.7e-12	2.43e-24	0.286647	0.784	0.374	4.66e-20	5.06e-16	4.86e-24
Lrp2	2.02e-25	0.350457	0.506	0.107	3.86e-21	1.08e-30	0.286295	0.486	0.117	2.08e-26	2.02e-25	2.17e-30
Bag1	2.06e-16	0.381613	0.975	0.956	3.95e-12	3.81e-20	0.283843	0.98	0.944	7.31e-16	2.06e-16	7.63e-20
Ube2s	9.84e-11	0.349914	1	0.982	1.89e-06	1.66e-10	0.282275	1	0.97	3.19e-06	1.66e-10	1.97e-10
Hoxb3os	1.22e-28	0.338204	0.696	0.194	2.34e-24	3.23e-30	0.281197	0.622	0.198	6.19e-26	1.22e-28	6.46e-30
Ran	1.17e-18	0.368406	1	0.997	2.24e-14	1.23e-16	0.27779	1	0.999	2.35e-12	1.23e-16	2.33e-18
H2afz	2.38e-13	0.379657	1	1	4.56e-09	1.7e-11	0.276679	1	1	3.26e-07	1.7e-11	4.76e-13
Hspe1	2.93e-17	0.324349	1	0.999	5.61e-13	7.42e-21	0.276552	1	0.999	1.42e-16	2.93e-17	1.48e-20
Agrn	2.07e-12	0.253922	0.797	0.453	3.98e-08	1.41e-21	0.275844	0.777	0.432	2.7e-17	2.07e-12	2.82e-21
Notch1	6.7e-17	0.32679	0.886	0.469	1.28e-12	1.56e-12	0.275602	0.77	0.489	2.99e-08	1.56e-12	1.34e-16
Krt8	4.71e-07	0.480374	0.38	0.164	0.00902689	3.73e-11	0.274575	0.473	0.22	7.16e-07	4.71e-07	7.47e-11
Mdh1	1.47e-11	0.277945	1	0.989	2.82e-07	5.7e-15	0.274412	0.993	0.972	1.09e-10	1.47e-11	1.14e-14
Hmgcs1	1.63e-15	0.427876	0.949	0.633	3.13e-11	4.95e-16	0.270296	0.845	0.515	9.48e-12	1.63e-15	9.89e-16
Gm17750	1.87e-92	0.326486	0.696	0.032	3.58e-88	1.5e-45	0.26881	0.486	0.069	2.87e-41	1.5e-45	3.74e-92
Idh1	7.5e-16	0.337156	0.899	0.444	1.44e-11	1.05e-10	0.268758	0.676	0.406	2.01e-06	1.05e-10	1.5e-15
Hist1h2ae	4.56e-10	0.46927	0.911	0.699	8.74e-06	3.02e-08	0.267842	0.872	0.627	0.000579895	3.02e-08	9.11e-10
Arpp19	3.65e-12	0.271421	1	0.939	6.99e-08	1.1e-16	0.266331	0.993	0.918	2.12e-12	3.65e-12	2.21e-16
Mki67	6.23e-09	0.275314	0.937	0.608	0.000119394	2.31e-11	0.265983	0.878	0.533	4.42e-07	6.23e-09	4.61e-11
Spc24	1.42e-15	0.428044	0.987	0.658	2.73e-11	6.12e-12	0.261097	0.926	0.586	1.17e-07	6.12e-12	2.85e-15
Aurkb	1.04e-19	0.420679	0.886	0.426	1.99e-15	1.27e-15	0.260968	0.736	0.386	2.44e-11	1.27e-15	2.07e-19
Kif20b	3.26e-11	0.281648	0.823	0.458	6.26e-07	3.1e-11	0.260335	0.689	0.415	5.94e-07	3.26e-11	6.2e-11
Eva1a	2.9e-22	0.361966	0.924	0.365	5.57e-18	1.74e-17	0.25824	0.818	0.388	3.33e-13	1.74e-17	5.81e-22
Pa2g4	1.91e-10	0.263066	1	0.968	3.66e-06	8.27e-14	0.257158	0.98	0.948	1.59e-09	1.91e-10	1.65e-13
Ccna2	5.6e-15	0.337316	0.937	0.515	1.07e-10	3.48e-11	0.254658	0.764	0.465	6.67e-07	3.48e-11	1.12e-14
Car2	3.79e-37	0.428368	0.494	0.061	7.27e-33	9.94e-33	0.253275	0.405	0.068	1.91e-28	9.94e-33	7.58e-37
Pdia6	7.15e-12	0.318445	0.987	0.987	1.37e-07	2.01e-15	0.253257	0.993	0.976	3.85e-11	7.15e-12	4.02e-15
Plpp2	2.75e-10	0.252583	0.671	0.335	5.27e-06	2.29e-21	0.252619	0.682	0.286	4.39e-17	2.75e-10	4.58e-21
Alyref	4.42e-12	0.303173	0.975	0.923	8.47e-08	3.9e-12	0.252199	0.993	0.862	7.47e-08	4.42e-12	7.8e-12
Dnajc2	4.2e-13	0.327558	0.975	0.91	8.05e-09	1.03e-12	0.251666	0.953	0.89	1.97e-08	1.03e-12	8.4e-13
Dach1	1.29e-12	0.301791	0.886	0.546	2.47e-08	7.33e-13	0.251611	0.838	0.56	1.41e-08	1.29e-12	1.47e-12
Tuba1b	1.43e-12	0.332508	1	0.989	2.74e-08	2e-10	0.251348	1	0.99	3.84e-06	2e-10	2.85e-12
Map4k4	1.54e-07	-0.25632	0.886	0.91	0.00296156	2.99e-10	-0.250474	0.77	0.864	5.73e-06	1.54e-07	5.98e-10
Tpt1	1.68e-25	-0.267039	1	1	3.22e-21	2.58e-37	-0.251268	1	1	4.94e-33	1.68e-25	5.15e-37
Tcf7l1	3.19e-10	-0.322249	0.481	0.681	6.11e-06	2.6e-11	-0.254397	0.466	0.653	4.98e-07	3.19e-10	5.2e-11
Wsb1	1.27e-07	-0.261613	0.608	0.731	0.00244426	7.44e-11	-0.25498	0.507	0.666	1.43e-06	1.27e-07	1.49e-10
Rbfox2	6.83e-09	-0.266654	0.671	0.779	0.00013102	1.76e-12	-0.255459	0.642	0.758	3.37e-08	6.83e-09	3.52e-12
Pnrc1	7.79e-10	-0.318385	0.937	0.967	1.49e-05	4.01e-10	-0.258329	0.946	0.958	7.7e-06	7.79e-10	8.03e-10
Tanc1	7.9e-10	-0.282532	0.557	0.741	1.51e-05	1.88e-12	-0.259045	0.622	0.724	3.6e-08	7.9e-10	3.75e-12
Sfrp1	0.00124336	-0.333352	0.342	0.469	1	0.000126486	-0.26145	0.25	0.374	1	0.00124336	0.000252956
Pdlim4	5.23e-10	-0.2977	0.405	0.67	1e-05	2.63e-11	-0.261694	0.372	0.598	5.04e-07	5.23e-10	5.26e-11
Eid1	2.09e-15	-0.376811	0.937	0.976	4e-11	1.29e-13	-0.26574	0.953	0.953	2.48e-09	1.29e-13	4.17e-15
Shisa2	5.43e-11	-0.280588	0.139	0.501	1.04e-06	6e-16	-0.269484	0.142	0.467	1.15e-11	5.43e-11	1.2e-15
Cxcl12	4.23e-06	-0.303635	0.278	0.496	0.0811268	5.99e-07	-0.269896	0.236	0.414	0.011483	4.23e-06	1.2e-06
Sfrp2	0.00311267	0.369244	0.759	0.647	1	0.00124179	-0.276063	0.574	0.659	1	0.00311267	0.00248204
Dlc1	7.52e-11	-0.345062	0.278	0.595	1.44e-06	7.31e-11	-0.276861	0.331	0.547	1.4e-06	7.52e-11	1.46e-10
S100a11	2.09e-11	-0.34421	0.962	0.951	4.01e-07	2.41e-10	-0.27779	0.946	0.934	4.61e-06	2.41e-10	4.18e-11
Alcam	9.38e-07	-0.344037	0.709	0.766	0.0179789	5.09e-07	-0.278666	0.642	0.697	0.00976329	9.38e-07	1.02e-06
Zeb1	1.84e-10	-0.30943	0.253	0.602	3.54e-06	1.83e-13	-0.284103	0.257	0.561	3.5e-09	1.84e-10	3.65e-13
Osr1	6.98e-15	-0.444598	0.101	0.565	1.34e-10	9.14e-15	-0.286873	0.108	0.428	1.75e-10	9.14e-15	1.4e-14
Eif3m	4.07e-08	-0.258334	0.987	0.997	0.000781001	1.93e-15	-0.288716	0.993	0.998	3.7e-11	4.07e-08	3.86e-15
Rspo1	5.22e-06	-0.279314	0.785	0.862	0.10012	1.2e-10	-0.289568	0.628	0.797	2.31e-06	5.22e-06	2.41e-10
Serpinb6a	2e-14	-0.387403	0.709	0.847	3.83e-10	2.91e-14	-0.290401	0.615	0.781	5.57e-10	2.91e-14	4e-14
Foxd2	8.23e-11	-0.269969	0.114	0.485	1.58e-06	1.01e-20	-0.290875	0.074	0.477	1.93e-16	8.23e-11	2.02e-20
Btg2	6.84e-05	-0.454903	0.544	0.7	1	2.38e-05	-0.292608	0.574	0.691	0.456557	6.84e-05	4.76e-05
Sipa1l1	2.61e-08	-0.26854	0.696	0.797	0.000499887	2.45e-14	-0.295673	0.554	0.739	4.69e-10	2.61e-08	4.9e-14
Eif4a2	1.29e-08	-0.280895	0.886	0.911	0.000248051	1.24e-12	-0.298424	0.926	0.931	2.38e-08	1.29e-08	2.48e-12
Slc1a3	2.19e-05	-0.25177	0.304	0.469	0.4201	3.07e-13	-0.300095	0.203	0.486	5.88e-09	2.19e-05	6.14e-13
Gpc6	6.71e-05	-0.257068	0.797	0.837	1	4.19e-10	-0.303265	0.716	0.809	8.03e-06	6.71e-05	8.38e-10
Hoxc9	7.02e-11	-0.368842	0.785	0.857	1.35e-06	4.85e-14	-0.303738	0.669	0.823	9.31e-10	7.02e-11	9.71e-14
Sulf2	4.12e-05	-0.251384	0.557	0.635	0.789181	1.12e-14	-0.303835	0.304	0.583	2.14e-10	4.12e-05	2.23e-14
6330403K07Rik	1.06e-08	-0.265531	0.329	0.61	0.000203413	8.24e-15	-0.303922	0.223	0.526	1.58e-10	1.06e-08	1.65e-14
Plat	1.44e-08	-0.32043	0.367	0.65	0.000275418	3.39e-14	-0.306505	0.23	0.556	6.5e-10	1.44e-08	6.79e-14
Pmp22	7.4e-05	-0.361363	0.203	0.374	1	5.29e-05	-0.306922	0.189	0.318	1	7.4e-05	0.000105754
Serpinh1	2.49e-08	-0.278558	0.975	0.997	0.000477124	1.66e-13	-0.307165	0.946	0.991	3.18e-09	2.49e-08	3.32e-13
Cox7a2l	8.7e-17	-0.367456	1	0.993	1.67e-12	8.44e-20	-0.308565	0.973	0.997	1.62e-15	8.7e-17	1.69e-19
Btg1	1.23e-09	-0.323956	0.873	0.917	2.36e-05	1.42e-13	-0.309571	0.818	0.917	2.72e-09	1.23e-09	2.84e-13
Itga8	2.35e-12	-0.365393	0.19	0.574	4.51e-08	8.9e-17	-0.310112	0.149	0.501	1.71e-12	2.35e-12	1.78e-16
Nt5dc2	6.4e-10	-0.275744	1	0.992	1.23e-05	4.91e-17	-0.311683	0.966	0.99	9.41e-13	6.4e-10	9.82e-17
Ifitm1	4.48e-06	-0.324525	0.278	0.481	0.0858219	3.98e-11	-0.312197	0.155	0.417	7.64e-07	4.48e-06	7.97e-11
Ckb	9.92e-08	-0.289009	0.354	0.576	0.00190219	3.88e-11	-0.312505	0.243	0.478	7.45e-07	9.92e-08	7.77e-11
Zeb2	0.808537	-0.263818	0.759	0.602	1	0.000855745	-0.312867	0.622	0.614	1	0.808537	0.00171076
Nedd4	5.12e-15	-0.291333	1	0.999	9.82e-11	1.98e-27	-0.314154	1	1	3.8e-23	5.12e-15	3.96e-27
Hist3h2ba	8.03e-07	-0.347589	0.772	0.846	0.0153972	1.31e-11	-0.314154	0.372	0.626	2.52e-07	8.03e-07	2.63e-11
Dst	3.12e-10	-0.409386	0.658	0.818	5.99e-06	9.6e-11	-0.314845	0.696	0.817	1.84e-06	3.12e-10	1.92e-10
Myh10	1.68e-07	-0.280762	0.835	0.897	0.00322846	9.57e-13	-0.31496	0.804	0.866	1.84e-08	1.68e-07	1.91e-12
Epb41l4aos	2.99e-09	-0.322478	0.734	0.824	5.74e-05	1.24e-11	-0.315552	0.703	0.814	2.37e-07	2.99e-09	2.48e-11
Negr1	7.83e-09	-0.254113	0.127	0.454	0.000150084	9.59e-17	-0.316949	0.149	0.491	1.84e-12	7.83e-09	1.92e-16
Tshz1	1.44e-10	-0.299196	0.354	0.676	2.75e-06	2.68e-14	-0.318239	0.412	0.647	5.13e-10	1.44e-10	5.35e-14
Kdm5b	8.2e-10	-0.328545	0.823	0.876	1.57e-05	3.07e-13	-0.318744	0.73	0.845	5.88e-09	8.2e-10	6.14e-13
Tshz2	7.88e-06	-0.279375	0.911	0.922	0.151169	1.53e-12	-0.321411	0.824	0.895	2.94e-08	7.88e-06	3.06e-12
Kcnq1ot1	2.78e-06	-0.350796	0.975	0.989	0.0532268	4.85e-09	-0.324337	0.946	0.964	9.3e-05	2.78e-06	9.7e-09
Foxp1	4.09e-07	-0.294893	0.886	0.923	0.00783742	4.4e-14	-0.324413	0.811	0.901	8.43e-10	4.09e-07	8.79e-14
Cntfr	4.17e-12	-0.330649	0.329	0.659	7.99e-08	5.75e-18	-0.325739	0.223	0.57	1.1e-13	4.17e-12	1.15e-17
Emp3	1.05e-13	-0.499865	0.304	0.686	2.02e-09	7.98e-13	-0.326331	0.365	0.657	1.53e-08	7.98e-13	2.11e-13
Shisa3	1.76e-07	-0.251209	0.19	0.477	0.00337318	4.72e-15	-0.334048	0.142	0.462	9.05e-11	1.76e-07	9.44e-15
Nnat	4.08e-07	-0.332001	0.646	0.819	0.00782497	3.05e-13	-0.334996	0.48	0.727	5.85e-09	4.08e-07	6.1e-13
Col1a1	0.348682	-0.541142	0.671	0.58	1	0.167832	-0.336871	0.392	0.414	1	0.348682	0.307497
Col2a1	3.46e-10	-0.31575	0.253	0.58	6.63e-06	1.34e-18	-0.338236	0.189	0.558	2.57e-14	3.46e-10	2.68e-18
Bbx	2e-09	-0.361417	0.785	0.89	3.83e-05	5.1e-13	-0.342056	0.757	0.869	9.78e-09	2e-09	1.02e-12
Slc16a1	9.54e-13	-0.33427	0.316	0.653	1.83e-08	3.49e-17	-0.344763	0.291	0.624	6.69e-13	9.54e-13	6.98e-17
Meox1	7.01e-08	-0.275329	0.063	0.346	0.00134356	6.8e-13	-0.346719	0.081	0.375	1.3e-08	7.01e-08	1.36e-12
Hoxc6	1.18e-14	-0.389167	0.354	0.734	2.26e-10	1.32e-19	-0.354739	0.399	0.694	2.52e-15	1.18e-14	2.63e-19
Rspo3	8.31e-07	-0.337107	0.114	0.391	0.0159356	1.8e-08	-0.356521	0.155	0.364	0.000344435	8.31e-07	3.59e-08
Eml4	6.86e-12	-0.316606	0.62	0.8	1.32e-07	4.56e-22	-0.364113	0.514	0.776	8.75e-18	6.86e-12	9.13e-22
Bnip3l	5.4e-13	-0.317594	0.975	0.989	1.03e-08	4.21e-23	-0.365919	0.986	0.99	8.08e-19	5.4e-13	8.42e-23
Penk	0.241807	-0.569777	0.354	0.352	1	0.74002	-0.37513	0.311	0.29	1	0.74002	0.425143
Serpinf1	6.39e-13	-0.368819	0.506	0.747	1.23e-08	2.75e-21	-0.377509	0.27	0.656	5.27e-17	6.39e-13	5.5e-21
Snap91	6.83e-12	-0.367943	0.203	0.562	1.31e-07	3.53e-19	-0.378814	0.169	0.55	6.77e-15	6.83e-12	7.06e-19
Col3a1	0.065816	-0.620102	0.519	0.532	1	0.432915	-0.379233	0.392	0.38	1	0.432915	0.1273
Eya4	1.1e-10	-0.310533	0.342	0.646	2.11e-06	2.05e-21	-0.379419	0.209	0.595	3.93e-17	1.1e-10	4.1e-21
Myo10	3.15e-11	-0.338839	0.62	0.765	6.04e-07	6.4e-21	-0.383296	0.52	0.773	1.23e-16	3.15e-11	1.28e-20
Cald1	1.63e-09	-0.467821	0.722	0.867	3.12e-05	1.42e-13	-0.385965	0.568	0.775	2.73e-09	1.63e-09	2.85e-13
Pdcd4	8.39e-24	-0.597942	0.785	0.95	1.61e-19	1.05e-20	-0.387652	0.838	0.938	2.02e-16	1.05e-20	1.68e-23
Col26a1	7.56e-18	-0.418481	0.38	0.745	1.45e-13	3.79e-26	-0.390312	0.209	0.641	7.26e-22	7.56e-18	7.57e-26
Pcp4	0.147733	-0.331879	0.722	0.504	1	0.983234	-0.392184	0.527	0.45	1	0.983234	0.27364
Fcgrt	1.13e-10	-0.301216	0.494	0.754	2.17e-06	9.15e-20	-0.399355	0.405	0.703	1.75e-15	1.13e-10	1.83e-19
Espn	8.24e-14	-0.423305	0.456	0.766	1.58e-09	1.36e-18	-0.402058	0.358	0.682	2.61e-14	8.24e-14	2.73e-18
Hmgn3	1.81e-12	-0.346606	0.595	0.819	3.47e-08	1.1e-23	-0.40244	0.412	0.75	2.11e-19	1.81e-12	2.2e-23
Hoxc8	2.29e-15	-0.463768	0.519	0.83	4.39e-11	8.26e-19	-0.404695	0.541	0.767	1.58e-14	2.29e-15	1.65e-18
Foxc2	4.69e-13	-0.434525	0.253	0.658	8.98e-09	4.3e-17	-0.407591	0.291	0.622	8.25e-13	4.69e-13	8.61e-17
Sparc	1.93e-25	-0.815533	0.962	0.991	3.7e-21	1.8e-22	-0.410429	0.926	0.968	3.45e-18	1.8e-22	3.86e-25
Fos	1.06e-05	-0.469358	0.608	0.718	0.204175	3.07e-06	-0.416745	0.655	0.757	0.058846	1.06e-05	6.14e-06
Ptprd	1.74e-13	-0.436096	0.481	0.755	3.34e-09	1.32e-18	-0.417792	0.385	0.682	2.52e-14	1.74e-13	2.63e-18
Il33	1.83e-05	-0.266095	0.114	0.33	0.351402	9.85e-13	-0.417964	0.115	0.398	1.89e-08	1.83e-05	1.97e-12
Mfap2	1.75e-14	-0.440062	0.582	0.841	3.35e-10	1.2e-23	-0.418137	0.399	0.775	2.3e-19	1.75e-14	2.4e-23
Fam213a	3.13e-14	-0.584624	0.646	0.827	6e-10	3.27e-10	-0.418963	0.743	0.79	6.27e-06	3.27e-10	6.26e-14
Gpc3	1.26e-08	-0.364979	0.949	0.976	0.000241521	1.04e-18	-0.424683	0.932	0.983	2e-14	1.26e-08	2.09e-18
Sncaip	2.81e-18	-0.467206	0.291	0.736	5.39e-14	2.64e-25	-0.429587	0.297	0.68	5.06e-21	2.81e-18	5.28e-25
Scx	2.15e-13	-0.397202	0.152	0.588	4.12e-09	1.16e-21	-0.431923	0.149	0.558	2.23e-17	2.15e-13	2.33e-21
Hmga2	8.08e-12	-0.373034	0.633	0.83	1.55e-07	4.15e-22	-0.432346	0.52	0.805	7.96e-18	8.08e-12	8.3e-22
Rem1	3.39e-15	-0.419558	0.278	0.736	6.5e-11	2.68e-24	-0.435482	0.243	0.655	5.14e-20	3.39e-15	5.36e-24
Cpxm1	2.77e-22	-0.578609	0.456	0.814	5.32e-18	8.44e-25	-0.43665	0.399	0.752	1.62e-20	2.77e-22	1.69e-24
Tmem100	7.19e-11	-0.533136	0.177	0.529	1.38e-06	8.09e-15	-0.442695	0.155	0.48	1.55e-10	7.19e-11	1.62e-14
Kif26b	9.41e-18	-0.471971	0.127	0.649	1.8e-13	2.89e-24	-0.443845	0.169	0.598	5.54e-20	9.41e-18	5.78e-24
Tcf4	1.4e-09	-0.329313	0.886	0.951	2.68e-05	1.16e-24	-0.446243	0.831	0.952	2.22e-20	1.4e-09	2.32e-24
Hs3st6	2.02e-17	-0.428935	0.165	0.642	3.88e-13	7.2e-24	-0.446503	0.169	0.584	1.38e-19	2.02e-17	1.44e-23
Pbx1	2.43e-06	-0.27447	0.924	0.93	0.0465072	2.58e-18	-0.446705	0.818	0.914	4.95e-14	2.43e-06	5.17e-18
Traf1	7.78e-11	-0.388243	0.114	0.484	1.49e-06	1.68e-16	-0.449482	0.101	0.449	3.22e-12	7.78e-11	3.36e-16
Lpin2	9.78e-12	-0.347525	0.671	0.818	1.88e-07	5.15e-25	-0.450347	0.541	0.797	9.88e-21	9.78e-12	1.03e-24
Acta2	0.201724	-0.452795	0.722	0.668	1	0.225705	-0.456072	0.635	0.578	1	0.225705	0.362755
Mafb	0.00129594	-0.534316	0.228	0.361	1	6.29e-06	-0.46187	0.216	0.383	0.120601	0.00129594	1.26e-05
Mfap4	8.13e-19	-0.586241	0.291	0.766	1.56e-14	6.86e-21	-0.46294	0.27	0.658	1.31e-16	8.13e-19	1.37e-20
Col1a2	0.192298	-0.689539	0.684	0.638	1	0.0581456	-0.471285	0.426	0.441	1	0.192298	0.11291
Ccnd2	2.83e-11	-0.574606	0.684	0.847	5.42e-07	5.43e-18	-0.478307	0.581	0.801	1.04e-13	2.83e-11	1.09e-17
Rcn3	1.89e-16	-0.435976	0.835	0.962	3.62e-12	1.13e-26	-0.479565	0.669	0.897	2.16e-22	1.89e-16	2.26e-26
Grb10	5.56e-18	-0.466089	0.962	0.986	1.07e-13	1.33e-27	-0.481938	0.919	0.974	2.56e-23	5.56e-18	2.67e-27
Hoxd11	3.21e-13	-0.396542	0.81	0.937	6.15e-09	9.64e-31	-0.488808	0.676	0.919	1.85e-26	3.21e-13	1.93e-30
Sox4	8.34e-24	-0.66191	0.911	0.987	1.6e-19	1.19e-25	-0.507291	0.926	0.978	2.28e-21	8.34e-24	2.38e-25
Unc5c	1.11e-17	-0.442067	0.329	0.752	2.14e-13	6.37e-30	-0.51041	0.223	0.695	1.22e-25	1.11e-17	1.27e-29
Hoxc10	2.29e-18	-0.542985	0.797	0.929	4.39e-14	3.96e-28	-0.515401	0.777	0.917	7.58e-24	2.29e-18	7.91e-28
Egr1	1.53e-09	-0.556721	0.772	0.858	2.94e-05	1.21e-15	-0.524436	0.743	0.889	2.31e-11	1.53e-09	2.41e-15
Eya1	1.07e-19	-0.552571	0.165	0.705	2.06e-15	5.92e-33	-0.533464	0.115	0.662	1.14e-28	1.07e-19	1.18e-32
Hoxa10	2.06e-13	-0.441883	0.949	0.938	3.96e-09	3.02e-27	-0.541219	0.824	0.917	5.78e-23	2.06e-13	6.03e-27
Hmcn1	1.02e-18	-0.577557	0.253	0.741	1.95e-14	4.92e-26	-0.546756	0.277	0.678	9.43e-22	1.02e-18	9.84e-26
Acaa2	3.46e-21	-0.542752	0.81	0.948	6.63e-17	5.16e-32	-0.564915	0.818	0.94	9.9e-28	3.46e-21	1.03e-31
Pkdcc	1.98e-11	-0.451198	0.911	0.921	3.79e-07	1.31e-24	-0.568227	0.676	0.902	2.5e-20	1.98e-11	2.61e-24
C1qtnf12	3.82e-13	-0.720659	0.759	0.855	7.33e-09	7.46e-15	-0.574866	0.601	0.789	1.43e-10	3.82e-13	1.49e-14
Crym	5.54e-14	-0.768551	0.367	0.676	1.06e-09	3.68e-15	-0.587569	0.365	0.616	7.06e-11	5.54e-14	7.37e-15
Tsc22d1	2.48e-20	-0.624729	0.987	0.998	4.76e-16	2.35e-30	-0.589742	0.932	0.998	4.51e-26	2.48e-20	4.7e-30
Nr2f2	1.58e-20	-0.640964	0.899	0.977	3.02e-16	1.43e-30	-0.594089	0.885	0.956	2.73e-26	1.58e-20	2.85e-30
Zbtb20	5.68e-15	-0.584639	0.797	0.92	1.09e-10	5.81e-28	-0.595217	0.696	0.909	1.11e-23	5.68e-15	1.16e-27
Tril	2.59e-17	-0.670354	0.481	0.765	4.96e-13	2.7e-24	-0.598697	0.378	0.694	5.17e-20	2.59e-17	5.39e-24
Clmp	1.05e-26	-0.744602	0.177	0.806	2.01e-22	1.2e-33	-0.611351	0.23	0.731	2.31e-29	1.05e-26	2.41e-33
Peg3	1.83e-12	-0.63195	0.734	0.877	3.5e-08	4.32e-18	-0.615283	0.628	0.834	8.29e-14	1.83e-12	8.64e-18
Ramp2	1.27e-21	-0.681967	0.646	0.885	2.44e-17	9.9e-27	-0.618234	0.561	0.85	1.9e-22	1.27e-21	1.98e-26
Fzd2	2.07e-21	-0.619331	0.595	0.867	3.97e-17	3.68e-36	-0.635063	0.493	0.864	7.05e-32	2.07e-21	7.36e-36
Vcan	3.14e-14	-0.570824	0.873	0.966	6.02e-10	1.84e-25	-0.648953	0.797	0.909	3.52e-21	3.14e-14	3.67e-25
H19	1.32e-06	-0.477187	0.899	0.916	0.0252377	7.97e-18	-0.660298	0.689	0.826	1.53e-13	1.32e-06	1.59e-17
Cdkn1c	6.29e-06	-0.891914	0.987	0.937	0.120603	4.86e-10	-0.665487	0.872	0.915	9.32e-06	6.29e-06	9.72e-10
Pax2	3.44e-15	-0.496395	0.886	0.966	6.6e-11	1.51e-36	-0.687148	0.743	0.949	2.9e-32	3.44e-15	3.02e-36
Capn6	1.51e-18	-0.645087	0.532	0.835	2.9e-14	5.5e-33	-0.700678	0.378	0.785	1.05e-28	1.51e-18	1.1e-32
Tmsb4x	0.229843	-0.792869	0.987	0.972	1	5.44e-08	-0.719546	0.946	0.967	0.00104211	0.229843	1.09e-07
Cdh11	1.6e-25	-0.807182	0.316	0.839	3.07e-21	1.82e-36	-0.744016	0.277	0.768	3.5e-32	1.6e-25	3.65e-36
Spock2	3.07e-27	-0.935953	0.367	0.835	5.89e-23	3.01e-35	-0.749267	0.304	0.768	5.77e-31	3.07e-27	6.01e-35
Cped1	2.38e-23	-0.728095	0.228	0.782	4.57e-19	1.36e-37	-0.762212	0.196	0.751	2.61e-33	2.38e-23	2.72e-37
Robo2	1.22e-21	-0.873782	0.329	0.794	2.33e-17	3.49e-34	-0.820371	0.277	0.762	6.7e-30	1.22e-21	6.99e-34
Ttc28	8.22e-24	-0.902347	0.468	0.858	1.58e-19	2.34e-37	-0.824161	0.385	0.809	4.49e-33	8.22e-24	4.69e-37
Igfbp5	5.23e-13	-0.908597	0.582	0.808	1e-08	3.8e-20	-0.835238	0.514	0.76	7.29e-16	5.23e-13	7.6e-20
Wt1	5.46e-26	-0.762886	0.582	0.919	1.05e-21	3.6e-40	-0.848744	0.446	0.867	6.9e-36	5.46e-26	7.19e-40
Six2	8e-25	-0.926677	0.19	0.777	1.53e-20	8.44e-36	-0.854665	0.155	0.718	1.62e-31	8e-25	1.69e-35
Fxyd6	9.53e-25	-0.776917	0.823	0.969	1.83e-20	3.11e-41	-0.856229	0.723	0.933	5.96e-37	9.53e-25	6.22e-41
Tgfbi	1.07e-20	-0.866382	0.253	0.764	2.06e-16	5.03e-29	-0.896152	0.243	0.711	9.64e-25	1.07e-20	1.01e-28
Gas1	2.88e-22	-0.941606	0.848	0.938	5.52e-18	1.49e-35	-0.955433	0.689	0.912	2.85e-31	2.88e-22	2.98e-35
Tpm2	4.08e-23	-1.05195	0.696	0.899	7.83e-19	2.51e-34	-1.04829	0.52	0.861	4.81e-30	4.08e-23	5.02e-34
Meis2	2.99e-28	-1.00562	0.671	0.95	5.73e-24	1.52e-46	-1.06542	0.588	0.911	2.92e-42	2.99e-28	3.05e-46
Cited1	5.41e-12	-1.33042	0.443	0.688	1.04e-07	6.46e-14	-1.17209	0.419	0.632	1.24e-09	5.41e-12	1.29e-13
Lsp1	1.66e-29	-1.18377	0.734	0.935	3.19e-25	1.92e-42	-1.18567	0.541	0.9	3.69e-38	1.66e-29	3.85e-42
Mest	2.55e-28	-1.22929	0.709	0.966	4.88e-24	1.06e-44	-1.29738	0.514	0.925	2.04e-40	2.55e-28	2.12e-44

## Sheet: Tubule_progenitors.5.marker
Gene	Mutant_p_val	Mutant_avg_logFC	Mutant_pct.1	Mutant_pct.2	Mutant_p_val_adj	CTRL_p_val	CTRL_avg_logFC	CTRL_pct.1	CTRL_pct.2	CTRL_p_val_adj	max_pval	minimump_p_val
C1qtnf12	5.17e-48	1.08672	0.991	0.828	9.91e-44	8.54e-33	1.12625	0.933	0.742	1.64e-28	8.54e-33	1.03e-47
Igfbp5	3.06e-23	0.78917	0.966	0.766	5.86e-19	3.86e-26	0.966834	0.933	0.701	7.39e-22	3.06e-23	7.71e-26
Lsp1	4.91e-20	0.560796	0.991	0.909	9.42e-16	1.02e-12	0.625927	0.923	0.84	1.95e-08	1.02e-12	9.82e-20
Id2	7.02e-23	0.699002	0.905	0.713	1.35e-18	1.77e-15	0.568039	0.904	0.749	3.4e-11	1.77e-15	1.4e-22
Csrp2	1.49e-17	0.724127	0.94	0.839	2.86e-13	2.65e-08	0.559267	0.885	0.824	0.000508552	2.65e-08	2.99e-17
Gxylt2	8.03e-23	0.445452	0.862	0.566	1.54e-18	1.1e-18	0.51516	0.798	0.513	2.11e-14	1.1e-18	1.61e-22
Pax2	5.31e-12	0.31975	0.991	0.955	1.02e-07	2.36e-19	0.489753	0.952	0.916	4.52e-15	5.31e-12	4.71e-19
Id3	1.07e-10	0.411763	0.991	0.961	2.05e-06	1.63e-13	0.489371	0.971	0.946	3.13e-09	1.07e-10	3.27e-13
H19	6.99e-12	0.491929	0.957	0.909	1.34e-07	6.3e-09	0.465976	0.885	0.798	0.000120783	6.3e-09	1.4e-11
S100a11	3.69e-15	0.363782	0.974	0.949	7.07e-11	7.73e-17	0.452266	0.971	0.932	1.48e-12	3.69e-15	1.55e-16
Wnt4	1.06e-05	0.387802	0.707	0.53	0.203254	1.68e-05	0.450074	0.683	0.519	0.321681	1.68e-05	2.12e-05
Igfbp4	6.56e-17	0.581447	0.948	0.907	1.26e-12	5.29e-11	0.442386	0.904	0.818	1.01e-06	5.29e-11	1.31e-16
Slit2	2.15e-17	0.483019	0.741	0.465	4.11e-13	1.97e-15	0.421896	0.663	0.4	3.78e-11	1.97e-15	4.29e-17
Ier5	1.58e-05	0.252415	0.741	0.734	0.302801	2.16e-08	0.385814	0.827	0.708	0.00041396	1.58e-05	4.32e-08
Cxcl12	3.08e-09	0.395927	0.655	0.455	5.91e-05	9.41e-10	0.384183	0.606	0.364	1.8e-05	3.08e-09	1.88e-09
Cxxc5	3.34e-13	0.385471	0.905	0.894	6.41e-09	7.83e-12	0.35686	0.913	0.895	1.5e-07	7.83e-12	6.69e-13
Btg1	4.3e-10	0.315645	0.931	0.911	8.25e-06	8.58e-11	0.35086	0.942	0.898	1.65e-06	4.3e-10	1.72e-10
Tmem100	3.76e-10	0.449722	0.69	0.476	7.21e-06	1.73e-08	0.337857	0.654	0.408	0.000331765	1.73e-08	7.52e-10
Acaa2	1.32e-15	0.375407	0.983	0.931	2.54e-11	8.46e-12	0.336529	0.952	0.919	1.62e-07	8.46e-12	2.65e-15
A730017C20Rik	2.17e-09	0.264361	0.638	0.486	4.16e-05	3.64e-12	0.327336	0.654	0.403	6.98e-08	2.17e-09	7.28e-12
Ctsl	5.92e-22	0.417934	0.991	0.984	1.13e-17	1.64e-08	0.317997	1	0.985	0.000315059	1.64e-08	1.18e-21
Dlc1	2.15e-09	0.279066	0.741	0.546	4.13e-05	7.09e-08	0.315347	0.654	0.5	0.00135905	7.09e-08	4.31e-09
Col2a1	3.02e-10	0.291021	0.724	0.531	5.8e-06	2.41e-09	0.312384	0.663	0.487	4.61e-05	2.41e-09	6.05e-10
Col9a1	4.69e-26	0.390457	0.56	0.174	8.98e-22	1.29e-16	0.309593	0.462	0.16	2.47e-12	1.29e-16	9.37e-26
Bmper	1.52e-28	0.380376	0.664	0.236	2.92e-24	2.01e-16	0.306854	0.452	0.152	3.85e-12	2.01e-16	3.04e-28
Wt1	1.93e-14	0.296034	0.991	0.878	3.7e-10	2.79e-05	0.280683	0.885	0.798	0.535303	2.79e-05	3.86e-14
Serf1	3.03e-15	0.344572	0.991	0.981	5.81e-11	2.14e-08	0.263982	0.971	0.982	0.000411156	2.14e-08	6.06e-15
Rps26	4.86e-24	0.277964	1	1	9.32e-20	1.11e-19	0.262222	1	1	2.12e-15	1.11e-19	9.72e-24
Zfp36l2	3.03e-09	0.299525	0.716	0.6	5.82e-05	5.26e-06	0.26108	0.673	0.622	0.100857	5.26e-06	6.07e-09
Bub1	1.84e-13	-0.250401	0.095	0.465	3.53e-09	3.16e-13	-0.253216	0.077	0.452	6.05e-09	3.16e-13	3.68e-13
Ppp1r14b	3.86e-12	-0.266738	0.991	1	7.4e-08	5.75e-08	-0.253417	0.942	0.997	0.00110235	5.75e-08	7.72e-12
Sfrp2	0.0053853	-0.336767	0.578	0.667	1	0.0230277	-0.254516	0.558	0.657	1	0.0230277	0.0107416
Cdca2	4.04e-13	-0.254959	0.086	0.438	7.75e-09	1.53e-12	-0.255762	0.038	0.396	2.94e-08	1.53e-12	8.08e-13
Sox11	9.14e-07	-0.305183	0.931	0.97	0.0175276	0.000692534	-0.258006	0.923	0.957	1	0.000692534	1.83e-06
Tcf21	8.91e-09	-0.268114	0.233	0.521	0.000170791	1.25e-05	-0.258655	0.231	0.447	0.239885	1.25e-05	1.78e-08
Atad2	3.78e-07	-0.29655	0.44	0.689	0.00725388	0.00015463	-0.259959	0.433	0.609	1	0.00015463	7.57e-07
Cnn2	6.62e-06	-0.319149	0.345	0.559	0.126887	0.00386012	-0.260684	0.346	0.474	1	0.00386012	1.32e-05
Fermt2	6.85e-11	-0.306247	0.638	0.815	1.31e-06	1.27e-08	-0.262506	0.51	0.825	0.000244233	1.27e-08	1.37e-10
Hist1h4d	1.66e-08	-0.36662	0.362	0.638	0.000318914	7.24e-06	-0.265097	0.375	0.608	0.138897	7.24e-06	3.33e-08
Fdps	2.92e-10	-0.360274	0.483	0.773	5.61e-06	1.41e-05	-0.268904	0.433	0.653	0.269493	1.41e-05	5.85e-10
Ifitm1	3.26e-11	-0.326701	0.172	0.503	6.25e-07	2.02e-07	-0.269708	0.144	0.406	0.00386437	2.02e-07	6.52e-11
Bcl2	7.78e-09	-0.252494	0.474	0.779	0.000149166	2.89e-09	-0.270666	0.385	0.715	5.54e-05	7.78e-09	5.78e-09
Actb	2.83e-14	-0.309839	1	1	5.43e-10	1.78e-10	-0.271439	1	1	3.42e-06	1.78e-10	5.67e-14
Rad21	3.1e-12	-0.320495	0.647	0.853	5.94e-08	5.63e-10	-0.275447	0.587	0.825	1.08e-05	5.63e-10	6.19e-12
Hnrnpab	1.34e-09	-0.264399	0.974	0.992	2.56e-05	1.09e-09	-0.276174	0.962	0.99	2.08e-05	1.34e-09	2.17e-09
Kif20b	6.23e-13	-0.289878	0.164	0.531	1.19e-08	3.35e-10	-0.277371	0.154	0.488	6.42e-06	3.35e-10	1.25e-12
Pfn1	9.74e-17	-0.308936	0.974	1	1.87e-12	3.44e-13	-0.286304	0.962	0.997	6.59e-09	3.44e-13	1.95e-16
Selenoh	1.98e-10	-0.282374	0.966	0.985	3.79e-06	1.34e-09	-0.287119	0.933	0.983	2.56e-05	1.34e-09	3.95e-10
Fxyd6	6.9e-09	-0.370765	0.897	0.965	0.000132213	0.000626907	-0.287603	0.923	0.9	1	0.000626907	1.38e-08
Tril	1.93e-15	-0.50634	0.474	0.778	3.71e-11	5.49e-09	-0.28974	0.375	0.68	0.000105285	5.49e-09	3.87e-15
Ramp2	1.2e-07	-0.339746	0.784	0.876	0.00230334	4.02e-05	-0.290705	0.692	0.821	0.770203	4.02e-05	2.4e-07
Gmnn	2.4e-06	-0.278465	0.509	0.689	0.0459799	2.33e-07	-0.295204	0.442	0.654	0.00446955	2.4e-06	4.66e-07
Hmgn5	1.26e-09	-0.252794	0.457	0.742	2.42e-05	2.31e-08	-0.297083	0.49	0.751	0.000443644	2.31e-08	2.52e-09
Bex4	1.49e-10	-0.268634	0.284	0.627	2.86e-06	6.25e-12	-0.297798	0.25	0.637	1.2e-07	1.49e-10	1.25e-11
Pimreg	2.35e-14	-0.348777	0.086	0.455	4.51e-10	2.64e-12	-0.299356	0.058	0.408	5.07e-08	2.64e-12	4.71e-14
Mis18bp1	1.32e-11	-0.307232	0.172	0.505	2.52e-07	1.36e-09	-0.300415	0.144	0.447	2.61e-05	1.36e-09	2.63e-11
Manf	5.87e-09	-0.292148	0.802	0.946	0.000112625	9.69e-09	-0.300671	0.769	0.906	0.000185787	9.69e-09	1.17e-08
Tmpo	3.13e-11	-0.29995	0.828	0.947	5.99e-07	4.99e-10	-0.301947	0.75	0.921	9.58e-06	4.99e-10	6.25e-11
Epha4	1.73e-09	-0.371245	0.164	0.453	3.32e-05	3.1e-06	-0.302279	0.221	0.448	0.0593459	3.1e-06	3.46e-09
Plk1	1.95e-12	-0.337158	0.095	0.439	3.74e-08	1.71e-08	-0.302415	0.125	0.392	0.000328697	1.71e-08	3.91e-12
Sgo2a	1.17e-13	-0.264179	0.086	0.463	2.24e-09	5.06e-13	-0.303958	0.058	0.429	9.71e-09	5.06e-13	2.33e-13
Lockd	1.75e-11	-0.297852	0.181	0.525	3.36e-07	4.19e-11	-0.30455	0.144	0.495	8.04e-07	4.19e-11	3.5e-11
Rangap1	1.38e-10	-0.321289	0.405	0.688	2.65e-06	6.61e-13	-0.308881	0.269	0.626	1.27e-08	1.38e-10	1.32e-12
Esco2	1.12e-14	-0.277788	0.06	0.441	2.14e-10	5.95e-14	-0.310281	0.038	0.42	1.14e-09	5.95e-14	2.23e-14
Crym	4.53e-09	-0.472157	0.431	0.681	8.68e-05	1.64e-06	-0.311473	0.365	0.604	0.0314657	1.64e-06	9.06e-09
Ccdc34	3.13e-08	-0.302928	0.871	0.965	0.000600443	4.19e-09	-0.316708	0.865	0.94	8.03e-05	3.13e-08	8.38e-09
Sgo1	2.85e-14	-0.287525	0.129	0.508	5.46e-10	3.28e-13	-0.317226	0.135	0.51	6.3e-09	3.28e-13	5.7e-14
Dnaja1	1.54e-15	-0.26954	0.991	0.999	2.96e-11	4.09e-14	-0.317721	0.962	0.998	7.83e-10	4.09e-14	3.09e-15
Meox1	7.87e-10	-0.258599	0.078	0.356	1.51e-05	4.44e-09	-0.324693	0.077	0.361	8.5e-05	4.44e-09	1.57e-09
Notch1	1.42e-17	-0.371369	0.121	0.554	2.72e-13	1.45e-12	-0.32901	0.192	0.567	2.79e-08	1.45e-12	2.84e-17
Traf1	5.29e-12	-0.358112	0.155	0.494	1.01e-07	1.22e-06	-0.329024	0.183	0.423	0.0234113	1.22e-06	1.06e-11
Kif11	2.61e-17	-0.364034	0.043	0.465	5.01e-13	1.21e-11	-0.329351	0.087	0.427	2.31e-07	1.21e-11	5.23e-17
Lsm2	8.73e-14	-0.340928	0.741	0.909	1.67e-09	4.6e-11	-0.330507	0.654	0.87	8.82e-07	4.6e-11	1.75e-13
Ckap2l	4.14e-14	-0.317108	0.095	0.468	7.93e-10	1.74e-13	-0.332877	0.058	0.44	3.33e-09	1.74e-13	8.27e-14
Kif22	4.9e-15	-0.362391	0.138	0.524	9.4e-11	5.27e-12	-0.338708	0.144	0.497	1.01e-07	5.27e-12	9.81e-15
Dbf4	4.27e-12	-0.290662	0.267	0.603	8.19e-08	1.68e-14	-0.342539	0.202	0.587	3.22e-10	4.27e-12	3.36e-14
Tpi1	3.74e-11	-0.275396	0.974	0.999	7.16e-07	7.09e-14	-0.343714	0.942	0.991	1.36e-09	3.74e-11	1.42e-13
Calm2	1.75e-19	-0.392165	0.991	1	3.35e-15	2.73e-11	-0.344566	0.962	0.998	5.23e-07	2.73e-11	3.5e-19
Emid1	0.000631974	-0.367366	0.491	0.588	1	0.000124561	-0.344783	0.413	0.574	1	0.000631974	0.000249107
Fgf8	6.52e-10	-0.355927	0.026	0.299	1.25e-05	9.14e-07	-0.346762	0.058	0.276	0.0175281	9.14e-07	1.3e-09
Fos	2.73e-07	-0.414107	0.474	0.741	0.00523973	0.00024369	-0.347046	0.587	0.76	1	0.00024369	5.47e-07
Dcn	1.55e-05	-0.522828	0.216	0.439	0.297071	0.00195824	-0.349052	0.115	0.256	1	0.00195824	3.1e-05
Cfh	9.21e-05	-0.32901	0.147	0.309	1	6.1e-07	-0.35239	0.058	0.278	0.0117005	9.21e-05	1.22e-06
Btg2	5.24e-07	-0.425176	0.483	0.715	0.0100423	7.67e-08	-0.353915	0.404	0.705	0.00146997	5.24e-07	1.53e-07
Ier2	3.88e-08	-0.366179	0.784	0.938	0.000743601	2.96e-07	-0.355919	0.769	0.946	0.00566798	2.96e-07	7.76e-08
Fabp5	6.3e-07	-0.341613	0.888	0.965	0.012074	4.95e-06	-0.35771	0.865	0.948	0.0949435	4.95e-06	1.26e-06
Pla2g7	3.98e-17	-0.339348	0.216	0.67	7.63e-13	3.77e-14	-0.361107	0.231	0.634	7.22e-10	3.77e-14	7.95e-17
Kif15	1.82e-15	-0.354499	0.155	0.55	3.5e-11	3.81e-16	-0.363283	0.087	0.528	7.31e-12	1.82e-15	7.62e-16
Cenpw	8.02e-11	-0.303114	0.586	0.837	1.54e-06	1.15e-13	-0.364236	0.413	0.786	2.21e-09	8.02e-11	2.3e-13
Aurkb	2.1e-17	-0.402955	0.086	0.514	4.03e-13	2.07e-12	-0.365513	0.125	0.472	3.97e-08	2.07e-12	4.21e-17
Meg3	0.000169601	-0.552036	0.267	0.439	1	0.00209645	-0.366244	0.163	0.301	1	0.00209645	0.000339174
Hoxb2	8.71e-11	-0.272161	0.517	0.808	1.67e-06	5.9e-13	-0.366343	0.394	0.764	1.13e-08	8.71e-11	1.18e-12
Tacc3	4.13e-14	-0.356792	0.207	0.594	7.92e-10	3.18e-13	-0.37252	0.173	0.542	6.09e-09	3.18e-13	8.26e-14
Bex1	5.58e-15	-0.375144	0.259	0.661	1.07e-10	2.37e-14	-0.377063	0.269	0.668	4.54e-10	2.37e-14	1.12e-14
Kif23	9.52e-17	-0.454923	0.103	0.513	1.82e-12	4.27e-14	-0.382093	0.115	0.508	8.18e-10	4.27e-14	1.9e-16
Emx2	1.81e-08	-0.340645	0.034	0.271	0.000347444	1.24e-08	-0.385555	0.077	0.345	0.000238457	1.81e-08	2.49e-08
Myl9	0.168321	-0.315121	0.466	0.523	1	0.000511899	-0.389677	0.269	0.452	1	0.168321	0.00102354
Cks1b	1.83e-16	-0.454647	0.819	0.939	3.51e-12	7.18e-11	-0.390185	0.846	0.91	1.38e-06	7.18e-11	3.66e-16
Fam213a	1.41e-07	-0.356047	0.629	0.837	0.00269601	7.28e-08	-0.391792	0.538	0.811	0.00139577	1.41e-07	1.46e-07
Tuba1a	3.52e-12	-0.502334	0.819	0.956	6.75e-08	2.59e-07	-0.398778	0.788	0.903	0.00497536	2.59e-07	7.04e-12
Lmnb1	1.05e-12	-0.390864	0.871	0.944	2.01e-08	2.07e-10	-0.400649	0.779	0.909	3.97e-06	2.07e-10	2.09e-12
Tagln	0.223008	-0.378801	0.259	0.302	1	0.323025	-0.401796	0.298	0.344	1	0.323025	0.396283
Racgap1	1.17e-15	-0.394616	0.164	0.561	2.23e-11	2.08e-13	-0.404362	0.154	0.539	3.98e-09	2.08e-13	2.33e-15
Rab3ip	3e-10	-0.373714	0.302	0.61	5.75e-06	4.8e-06	-0.408323	0.452	0.632	0.0921116	4.8e-06	6e-10
Junb	4.12e-10	-0.40937	0.397	0.709	7.89e-06	3.21e-07	-0.415219	0.481	0.746	0.0061632	3.21e-07	8.23e-10
Nasp	0.000117388	-0.27218	1	0.973	1	1.59e-08	-0.416076	0.865	0.936	0.000304463	0.000117388	3.18e-08
Cdca3	3.01e-13	-0.413752	0.284	0.63	5.77e-09	1.33e-11	-0.418597	0.26	0.582	2.54e-07	1.33e-11	6.01e-13
Incenp	9.04e-16	-0.4404	0.198	0.575	1.73e-11	6.82e-15	-0.419114	0.125	0.537	1.31e-10	6.82e-15	1.81e-15
Cldn5	0.0195651	-0.44535	0.276	0.367	1	0.012302	-0.422633	0.231	0.344	1	0.0195651	0.0244526
Fbxo5	7.26e-15	-0.420664	0.164	0.55	1.39e-10	6.94e-14	-0.42408	0.125	0.513	1.33e-09	6.94e-14	1.45e-14
Hist1h1e	1.05e-07	-0.512136	0.681	0.816	0.00202217	2.04e-05	-0.425042	0.673	0.814	0.390972	2.04e-05	2.11e-07
Aes	1.01e-18	-0.378425	0.974	0.997	1.94e-14	1.87e-20	-0.43534	0.933	0.997	3.58e-16	1.01e-18	3.74e-20
Anxa2	1.68e-06	-0.430008	0.431	0.616	0.0321646	2.26e-06	-0.436992	0.375	0.603	0.0433823	2.26e-06	3.36e-06
Pbk	9e-17	-0.416016	0.155	0.56	1.73e-12	2.69e-16	-0.437861	0.106	0.535	5.15e-12	2.69e-16	1.8e-16
Spc25	1.71e-10	-0.414228	0.431	0.681	3.27e-06	1.1e-09	-0.44522	0.404	0.667	2.11e-05	1.1e-09	3.41e-10
H2afz	1.99e-07	-0.31469	1	1	0.0038137	4.1e-11	-0.447726	1	1	7.86e-07	1.99e-07	8.2e-11
Gm266	9.89e-05	-0.302429	0.905	0.954	1	3.79e-10	-0.448243	0.683	0.909	7.26e-06	9.89e-05	7.57e-10
Ddah1	5.78e-10	-0.281295	0.362	0.671	1.11e-05	2.32e-13	-0.448368	0.317	0.686	4.44e-09	5.78e-10	4.63e-13
Tubb5	1.49e-29	-0.555707	1	1	2.85e-25	1.36e-15	-0.45457	1	1	2.61e-11	1.36e-15	2.98e-29
Lgals1	5.2e-07	-0.630923	0.569	0.751	0.00997989	0.002039	-0.455878	0.5	0.659	1	0.002039	1.04e-06
Ccnb2	1.91e-09	-0.345947	0.319	0.625	3.66e-05	4.21e-10	-0.456458	0.26	0.579	8.07e-06	1.91e-09	8.42e-10
Col4a1	4.47e-13	-0.410297	0.81	0.948	8.58e-09	1.13e-13	-0.457627	0.731	0.913	2.16e-09	4.47e-13	2.25e-13
Tuba1b	1.02e-18	-0.54287	0.966	0.993	1.95e-14	1.4e-11	-0.47117	0.981	0.992	2.69e-07	1.4e-11	2.03e-18
Col3a1	1.02e-07	-0.799271	0.31	0.56	0.0019558	0.1491	-0.473236	0.337	0.386	1	0.1491	2.04e-07
Chchd10	3.7e-10	-0.328932	0.517	0.788	7.1e-06	9.61e-11	-0.476158	0.51	0.78	1.84e-06	3.7e-10	1.92e-10
Hmmr	6.13e-18	-0.506257	0.052	0.487	1.18e-13	6.42e-13	-0.477313	0.096	0.464	1.23e-08	6.42e-13	1.23e-17
Pax8	0.000139368	-0.410632	0.509	0.649	1	5.93e-10	-0.481522	0.375	0.677	1.14e-05	0.000139368	1.19e-09
Tyms	6.53e-15	-0.497508	0.509	0.803	1.25e-10	8.57e-13	-0.485064	0.481	0.742	1.64e-08	8.57e-13	1.31e-14
Spint2	1.09e-16	-0.376881	0.172	0.605	2.09e-12	4.46e-16	-0.491864	0.212	0.631	8.55e-12	4.46e-16	2.19e-16
Tpx2	6.38e-16	-0.588123	0.233	0.598	1.22e-11	8.84e-14	-0.503548	0.192	0.562	1.7e-09	8.84e-14	1.28e-15
Penk	0.000479912	-0.575426	0.207	0.372	1	0.000430703	-0.509696	0.144	0.31	1	0.000479912	0.000861221
Nucks1	2.82e-11	-0.359509	0.948	0.98	5.41e-07	3.31e-17	-0.511605	0.885	0.969	6.35e-13	2.82e-11	6.63e-17
Rrm2	3.04e-11	-0.457581	0.319	0.623	5.82e-07	2.31e-13	-0.511699	0.202	0.556	4.43e-09	3.04e-11	4.62e-13
Ccna2	7.01e-17	-0.456776	0.19	0.597	1.34e-12	3.28e-16	-0.512805	0.135	0.55	6.3e-12	3.28e-16	1.4e-16
Cenpe	1.47e-09	-0.438257	0.353	0.646	2.81e-05	2.41e-12	-0.517936	0.192	0.577	4.63e-08	1.47e-09	4.83e-12
Prc1	1.75e-16	-0.630318	0.121	0.516	3.36e-12	1.98e-12	-0.523669	0.144	0.502	3.79e-08	1.98e-12	3.51e-16
Tubb2b	3.92e-21	-0.556584	0.422	0.847	7.52e-17	6.11e-17	-0.526199	0.385	0.781	1.17e-12	6.11e-17	7.84e-21
Cdc20	1.39e-14	-0.666664	0.241	0.604	2.67e-10	2.23e-10	-0.548395	0.279	0.578	4.28e-06	2.23e-10	2.79e-14
Jpt1	5.26e-28	-0.617657	0.853	0.969	1.01e-23	7.7e-21	-0.551607	0.808	0.96	1.48e-16	7.7e-21	1.05e-27
Mpc2	4.97e-06	-0.25991	0.802	0.91	0.0952455	5.45e-07	-0.551801	0.808	0.9	0.0104517	4.97e-06	1.09e-06
Col1a1	0.0126597	-0.68825	0.491	0.601	1	0.00234462	-0.575333	0.288	0.424	1	0.0126597	0.00468375
Ccnb1	6.54e-16	-0.577185	0.138	0.542	1.25e-11	4.07e-14	-0.57672	0.115	0.504	7.8e-10	4.07e-14	1.31e-15
Hes1	2.26e-22	-0.620734	0.302	0.774	4.34e-18	1.54e-17	-0.584682	0.317	0.746	2.96e-13	1.54e-17	4.53e-22
Ptn	3.73e-16	-0.6793	0.819	0.931	7.15e-12	4.68e-09	-0.585683	0.798	0.9	8.98e-05	4.68e-09	7.46e-16
Spc24	2.16e-16	-0.517081	0.405	0.722	4.14e-12	3.36e-16	-0.589437	0.317	0.671	6.44e-12	3.36e-16	4.31e-16
Pcp4	1.93e-12	-0.72781	0.216	0.562	3.7e-08	5.14e-07	-0.591532	0.231	0.487	0.00985207	5.14e-07	3.86e-12
Uncx	1.42e-14	-0.546789	0.776	0.924	2.72e-10	1.28e-11	-0.599948	0.76	0.889	2.46e-07	1.28e-11	2.83e-14
Nusap1	8.27e-17	-0.660408	0.147	0.551	1.59e-12	4.07e-11	-0.607737	0.192	0.514	7.81e-07	4.07e-11	1.65e-16
Cenpa	1.24e-10	-0.539909	0.336	0.634	2.39e-06	1.08e-10	-0.611015	0.298	0.604	2.06e-06	1.24e-10	2.15e-10
Arl6ip1	2.65e-12	-0.627203	0.707	0.865	5.09e-08	2.62e-10	-0.644299	0.692	0.887	5.03e-06	2.62e-10	5.31e-12
Smc2	5.6e-19	-0.624442	0.526	0.785	1.07e-14	1.21e-16	-0.661181	0.413	0.742	2.31e-12	1.21e-16	1.12e-18
Cdca8	7.71e-19	-0.681873	0.31	0.684	1.48e-14	5.96e-17	-0.666573	0.212	0.639	1.14e-12	5.96e-17	1.54e-18
Col1a2	0.000446897	-0.807217	0.509	0.66	1	0.0171793	-0.670299	0.346	0.449	1	0.0171793	0.000893595
Cdk1	1.05e-15	-0.664879	0.422	0.713	2.02e-11	7.6e-15	-0.675019	0.337	0.672	1.46e-10	7.6e-15	2.1e-15
Tpm2	6.37e-10	-0.604754	0.819	0.891	1.22e-05	2.27e-07	-0.677972	0.769	0.817	0.00435788	2.27e-07	1.27e-09
Cks2	3.13e-17	-0.759584	0.491	0.794	6.01e-13	1.72e-13	-0.682528	0.5	0.76	3.29e-09	1.72e-13	6.26e-17
Epcam	1.6e-05	-0.382014	0.276	0.484	0.306478	1.27e-06	-0.682549	0.26	0.471	0.0244338	1.6e-05	2.55e-06
Ezr	5.69e-24	-0.559273	0.457	0.852	1.09e-19	1.82e-25	-0.684357	0.471	0.889	3.48e-21	5.69e-24	3.63e-25
Cdkn1c	5.06e-23	-1.17529	0.767	0.964	9.7e-19	4.19e-09	-0.713302	0.721	0.93	8.04e-05	4.19e-09	1.01e-22
Mki67	6.07e-14	-0.704822	0.362	0.671	1.16e-09	3.07e-15	-0.716156	0.231	0.622	5.89e-11	6.07e-14	6.15e-15
Clu	2.68e-10	-0.650845	0.207	0.498	5.15e-06	8.15e-12	-0.749293	0.231	0.567	1.56e-07	2.68e-10	1.63e-11
H2afx	3.94e-20	-0.848455	0.698	0.898	7.55e-16	2.07e-12	-0.754975	0.683	0.861	3.97e-08	2.07e-12	7.88e-20
Ube2s	5.28e-22	-0.654181	0.948	0.988	1.01e-17	1.17e-21	-0.755053	0.894	0.984	2.25e-17	1.17e-21	1.06e-21
Smc4	1.21e-17	-0.658342	0.603	0.846	2.31e-13	1.72e-17	-0.764515	0.548	0.812	3.3e-13	1.72e-17	2.41e-17
Hist1h2ae	2.6e-08	-0.920643	0.612	0.73	0.000498972	1.43e-06	-0.799184	0.529	0.677	0.0274534	1.43e-06	5.2e-08
Birc5	4.76e-23	-0.83778	0.267	0.715	9.14e-19	1.62e-16	-0.800466	0.308	0.662	3.1e-12	1.62e-16	9.53e-23
Acta2	0.000107822	-0.850592	0.526	0.692	1	0.0152963	-0.81471	0.481	0.598	1	0.0152963	0.000215632
Igfbp7	5.44e-18	-0.854162	0.293	0.663	1.04e-13	1.19e-14	-0.88064	0.413	0.729	2.29e-10	1.19e-14	1.09e-17
Pclaf	1.06e-17	-0.901264	0.517	0.774	2.03e-13	3.19e-17	-0.946322	0.413	0.733	6.12e-13	3.19e-17	2.12e-17
Tubb4b	1.48e-19	-0.857181	0.741	0.896	2.83e-15	4.21e-17	-0.950539	0.663	0.863	8.07e-13	4.21e-17	2.96e-19
Hist1h1b	1.8e-08	-0.981177	0.56	0.712	0.000345862	1.84e-07	-0.957024	0.538	0.685	0.0035293	1.84e-07	3.61e-08
Tmsb4x	1.57e-14	-1.34768	0.905	0.983	3.02e-10	2.31e-06	-0.984486	0.885	0.973	0.0442493	2.31e-06	3.15e-14
Cenpf	9.22e-12	-0.807716	0.388	0.664	1.77e-07	8.9e-15	-1.00209	0.25	0.621	1.71e-10	9.22e-12	1.78e-14
Ccnd1	1.13e-09	-1.07299	0.603	0.779	2.17e-05	2.1e-09	-1.04038	0.548	0.758	4.02e-05	2.1e-09	2.26e-09
Hmgb2	5.25e-16	-0.926296	0.957	0.971	1.01e-11	5.51e-16	-1.05686	0.942	0.969	1.06e-11	5.51e-16	1.05e-15
Top2a	2.18e-20	-1.19278	0.353	0.712	4.18e-16	9.37e-16	-1.07496	0.365	0.683	1.8e-11	9.37e-16	4.36e-20
Ube2c	1.12e-13	-1.11501	0.457	0.729	2.15e-09	1.03e-13	-1.07812	0.385	0.698	1.97e-09	1.12e-13	2.06e-13
Lhx1	3.62e-08	-1.04736	0.207	0.429	0.000693772	6.95e-15	-1.16393	0.115	0.508	1.33e-10	3.62e-08	1.39e-14
Cited1	3.66e-19	-1.31469	0.328	0.714	7.03e-15	7.89e-14	-1.19956	0.279	0.637	1.51e-09	7.89e-14	7.33e-19
Hist1h2ap	1.3e-06	-1.2717	0.897	0.919	0.0250024	1.31e-06	-1.23444	0.798	0.801	0.0250894	1.31e-06	2.61e-06

## Sheet: Tubule_progenitors.6.marker
Gene	Mutant_p_val	Mutant_avg_logFC	Mutant_pct.1	Mutant_pct.2	Mutant_p_val_adj	CTRL_p_val	CTRL_avg_logFC	CTRL_pct.1	CTRL_pct.2	CTRL_p_val_adj	max_pval	minimump_p_val
Wfdc2	6.71e-37	1.61983	1	0.732	1.29e-32	3.25e-59	1.6965	0.983	0.623	6.23e-55	6.71e-37	6.5e-59
Epcam	1.86e-33	1.43152	0.901	0.425	3.57e-29	2.35e-50	1.59421	0.882	0.393	4.52e-46	1.86e-33	4.71e-50
Mecom	7.24e-33	1.07246	0.775	0.241	1.39e-28	1.17e-63	1.11104	0.891	0.264	2.24e-59	7.24e-33	2.34e-63
Atp1b1	2.65e-07	0.541601	0.592	0.388	0.00508867	6.2e-24	1.0266	0.824	0.462	1.19e-19	2.65e-07	1.24e-23
S100g	1.47e-07	1.05239	0.465	0.219	0.00282151	2.08e-10	1.02536	0.395	0.185	3.98e-06	1.47e-07	4.16e-10
Ccnd1	1.36e-21	0.978777	0.986	0.74	2.6e-17	8.14e-34	0.985691	1	0.702	1.56e-29	1.36e-21	1.63e-33
Irx1	9.07e-15	0.725198	0.239	0.036	1.74e-10	2.17e-14	0.969388	0.319	0.098	4.17e-10	2.17e-14	1.81e-14
Cldn7	1.33e-48	1.03139	0.718	0.114	2.55e-44	4.94e-70	0.934968	0.739	0.12	9.47e-66	1.33e-48	9.88e-70
Fstl1	2.95e-09	0.565467	0.887	0.814	5.65e-05	3.87e-27	0.925356	0.916	0.789	7.41e-23	2.95e-09	7.73e-27
Chchd10	2.62e-15	0.511743	0.986	0.738	5.02e-11	1.96e-30	0.89618	0.966	0.725	3.76e-26	2.62e-15	3.92e-30
Fgf8	5.19e-24	0.980807	0.718	0.231	9.95e-20	6.16e-26	0.870902	0.597	0.209	1.18e-21	5.19e-24	1.23e-25
Spint2	1.11e-30	0.903668	0.915	0.526	2.12e-26	1.52e-44	0.867491	0.924	0.545	2.91e-40	1.11e-30	3.03e-44
Pdgfa	6.81e-06	0.409511	0.901	0.81	0.130504	4.18e-17	0.842975	0.95	0.793	8.01e-13	6.81e-06	8.36e-17
Lhx1	1.42e-24	0.984523	0.915	0.363	2.71e-20	2.26e-29	0.827613	0.924	0.408	4.33e-25	1.42e-24	4.52e-29
Pou3f3	1.42e-54	0.615601	0.69	0.084	2.73e-50	3.24e-62	0.811545	0.782	0.162	6.21e-58	1.42e-54	6.48e-62
Tfap2b	2.61e-45	0.71341	0.366	0.018	5e-41	8.87e-73	0.804734	0.462	0.019	1.7e-68	2.61e-45	1.77e-72
Mt1	5.72e-18	0.576385	0.69	0.259	1.1e-13	6.45e-26	0.804242	0.731	0.338	1.24e-21	5.72e-18	1.29e-25
Rab3ip	5.29e-20	0.665483	0.915	0.547	1.01e-15	8.43e-33	0.77348	0.899	0.576	1.62e-28	5.29e-20	1.69e-32
Tmem52b	1.12e-20	0.599124	0.268	0.03	2.15e-16	2.23e-30	0.760743	0.311	0.036	4.27e-26	1.12e-20	4.46e-30
Mal	1.63e-41	0.400927	0.352	0.019	3.13e-37	7.69e-50	0.757858	0.445	0.044	1.48e-45	1.63e-41	1.54e-49
Kdm2b	4.25e-18	0.704248	0.915	0.655	8.16e-14	1.77e-21	0.680023	0.891	0.633	3.39e-17	4.25e-18	3.54e-21
Itga6	3.97e-21	0.543504	0.859	0.419	7.6e-17	2.69e-28	0.667606	0.857	0.461	5.16e-24	3.97e-21	5.39e-28
Cxcl14	4.68e-40	0.729866	0.732	0.146	8.98e-36	2.69e-36	0.660479	0.563	0.125	5.15e-32	2.69e-36	9.36e-40
Emx2	4.47e-27	0.631754	0.746	0.204	8.57e-23	7.01e-37	0.659229	0.773	0.259	1.34e-32	4.47e-27	1.4e-36
Pantr1	7.34e-50	0.541252	0.62	0.072	1.41e-45	5.11e-54	0.642024	0.672	0.128	9.8e-50	7.34e-50	1.02e-53
Epha4	1e-24	0.937572	0.803	0.388	1.92e-20	6.1e-19	0.639734	0.697	0.389	1.17e-14	6.1e-19	2e-24
Hipk2	1.71e-16	0.567694	0.986	0.781	3.28e-12	7.6e-21	0.633084	0.908	0.787	1.46e-16	1.71e-16	1.52e-20
Dbi	1.84e-18	0.563136	1	0.948	3.52e-14	3.33e-31	0.586827	1	0.928	6.38e-27	1.84e-18	6.66e-31
Sfrp2	1.64e-12	0.806369	0.887	0.638	3.14e-08	2.49e-08	0.582034	0.79	0.628	0.000477562	2.49e-08	3.27e-12
Nudt4	0.00596798	0.261608	0.887	0.777	1	3.58e-10	0.575338	0.832	0.774	6.87e-06	0.00596798	7.17e-10
Prss23	3.65e-10	0.421928	0.577	0.26	7e-06	9.8e-29	0.574334	0.706	0.259	1.88e-24	3.65e-10	1.96e-28
Ly6a	2.76e-10	0.337714	0.465	0.169	5.29e-06	1.28e-15	0.569949	0.513	0.211	2.45e-11	2.76e-10	2.56e-15
Atp1a1	1.48e-08	0.268847	0.972	0.85	0.000283808	1.8e-16	0.567908	0.975	0.846	3.45e-12	1.48e-08	3.6e-16
Tubb2b	1.97e-12	0.545672	0.972	0.783	3.78e-08	6.73e-19	0.562462	0.899	0.721	1.29e-14	1.97e-12	1.35e-18
Lamb1	1.25e-18	0.46656	0.972	0.617	2.39e-14	3.29e-23	0.543117	0.941	0.659	6.3e-19	1.25e-18	6.57e-23
Cldn6	1.78e-38	0.510325	0.676	0.128	3.41e-34	1e-48	0.541083	0.731	0.176	1.92e-44	1.78e-38	2e-48
Irx2	4.61e-25	0.323589	0.239	0.017	8.85e-21	9.38e-27	0.538531	0.303	0.042	1.8e-22	4.61e-25	1.88e-26
Hes1	1.74e-06	0.309404	0.93	0.702	0.033368	2.09e-14	0.535094	0.866	0.681	4.01e-10	1.74e-06	4.18e-14
Acer2	1.79e-21	0.433527	0.718	0.264	3.43e-17	1.01e-40	0.532639	0.748	0.248	1.93e-36	1.79e-21	2.01e-40
Sox9	3.02e-32	0.585588	0.592	0.111	5.8e-28	2.78e-36	0.528355	0.496	0.094	5.33e-32	3.02e-32	5.56e-36
Sim2	6.26e-21	0.438899	0.197	0.013	1.2e-16	7.77e-20	0.521712	0.244	0.037	1.49e-15	7.77e-20	1.25e-20
4930523C07Rik	1.84e-33	0.580289	0.718	0.165	3.53e-29	1.61e-45	0.521076	0.655	0.144	3.08e-41	1.84e-33	3.22e-45
Lama1	4.27e-09	0.313106	0.507	0.232	8.19e-05	4.05e-22	0.519184	0.664	0.285	7.76e-18	4.27e-09	8.1e-22
Hoxb2	1.64e-18	0.463741	0.986	0.757	3.14e-14	1.73e-29	0.519176	0.941	0.699	3.31e-25	1.64e-18	3.46e-29
Smagp	6.16e-18	0.424944	0.732	0.307	1.18e-13	1.78e-35	0.51392	0.815	0.309	3.41e-31	6.16e-18	3.56e-35
Bmp2	7.38e-34	0.757435	0.648	0.138	1.41e-29	7.43e-23	0.51045	0.445	0.12	1.42e-18	7.43e-23	1.48e-33
Cdh16	4.18e-11	0.283401	0.437	0.157	8.02e-07	1.59e-24	0.508852	0.597	0.219	3.06e-20	4.18e-11	3.19e-24
Pygl	2.81e-16	0.403411	0.662	0.27	5.39e-12	2.25e-24	0.503967	0.639	0.256	4.32e-20	2.81e-16	4.5e-24
Calm1	5.83e-18	0.44153	1	0.987	1.12e-13	3.95e-25	0.498244	1	0.979	7.57e-21	5.83e-18	7.89e-25
Pax8	3.32e-16	0.573551	0.972	0.606	6.37e-12	1.57e-18	0.497858	0.916	0.612	3.01e-14	3.32e-16	3.14e-18
Fdps	1.46e-14	0.504798	0.972	0.721	2.8e-10	4.71e-17	0.496517	0.866	0.6	9.03e-13	1.46e-14	9.42e-17
Defb25	4.95e-08	0.582557	0.493	0.263	0.000949689	0.000318176	0.495473	0.328	0.222	1	0.000318176	9.91e-08
Bag1	6.54e-07	0.28008	1	0.954	0.0125378	5.35e-17	0.495326	0.975	0.946	1.03e-12	6.54e-07	1.07e-16
Fabp4	0.0219134	0.810478	0.563	0.426	1	0.699442	0.493617	0.462	0.438	1	0.699442	0.0433466
Cthrc1	7.2e-05	0.262716	0.366	0.187	1	1.83e-11	0.489328	0.513	0.251	3.51e-07	7.2e-05	3.66e-11
Mt2	3.59e-15	0.377362	0.451	0.127	6.89e-11	6.52e-21	0.488549	0.378	0.097	1.25e-16	3.59e-15	1.3e-20
Eva1a	1.94e-10	0.255503	0.746	0.384	3.71e-06	5.73e-25	0.487477	0.857	0.396	1.1e-20	1.94e-10	1.15e-24
Cmtm8	1.26e-18	0.355257	0.718	0.3	2.41e-14	1.31e-30	0.476577	0.731	0.3	2.52e-26	1.26e-18	2.63e-30
Hoxb4	5.36e-15	0.39551	0.915	0.75	1.03e-10	1.13e-20	0.468284	0.899	0.724	2.17e-16	5.36e-15	2.26e-20
Hist1h2ap	8.37e-07	0.431857	1	0.91	0.0160409	4.8e-07	0.46723	0.933	0.783	0.00919639	8.37e-07	9.59e-07
Mpc2	3.85e-06	0.308345	0.972	0.891	0.0737614	2.21e-11	0.464847	0.916	0.888	4.24e-07	3.85e-06	4.42e-11
Ldhb	1.28e-12	0.439815	1	0.96	2.46e-08	4.08e-13	0.463402	0.983	0.949	7.83e-09	1.28e-12	8.16e-13
Hoxb8	5.54e-19	0.471384	0.958	0.66	1.06e-14	1.26e-25	0.460722	0.908	0.627	2.41e-21	5.54e-19	2.51e-25
Hoxb7	2.2e-12	0.394524	0.831	0.617	4.21e-08	4.03e-24	0.460396	0.882	0.607	7.72e-20	2.2e-12	8.05e-24
Dag1	8.25e-08	0.279519	0.887	0.73	0.00158169	5.17e-18	0.457771	0.891	0.684	9.92e-14	8.25e-08	1.03e-17
Clint1	1.35e-06	0.322683	0.915	0.78	0.0259336	1.91e-12	0.453267	0.908	0.739	3.67e-08	1.35e-06	3.83e-12
Tpd52	1.5e-19	0.435119	0.972	0.658	2.87e-15	2.71e-23	0.450792	0.908	0.636	5.2e-19	1.5e-19	5.42e-23
Ethe1	1.36e-16	0.532141	0.845	0.501	2.62e-12	4.21e-25	0.44617	0.782	0.431	8.07e-21	1.36e-16	8.42e-25
Sox11	2.79e-10	0.419094	1	0.963	5.36e-06	1.25e-09	0.442062	0.983	0.949	2.39e-05	1.25e-09	5.59e-10
Sim1	1.81e-44	0.450676	0.507	0.048	3.46e-40	5.77e-50	0.439121	0.563	0.085	1.11e-45	1.81e-44	1.15e-49
Lhx1os	2.87e-23	0.439234	0.746	0.232	5.51e-19	1.44e-27	0.429067	0.748	0.276	2.76e-23	2.87e-23	2.88e-27
Bex1	1.49e-06	0.357833	0.775	0.601	0.0286249	9.62e-18	0.428905	0.857	0.597	1.84e-13	1.49e-06	1.92e-17
Bex4	2.39e-07	0.39988	0.789	0.571	0.00458246	1.18e-18	0.427519	0.857	0.564	2.26e-14	2.39e-07	2.35e-18
Crb3	7.16e-34	0.350828	0.62	0.116	1.37e-29	1.36e-39	0.427321	0.689	0.187	2.6e-35	7.16e-34	2.71e-39
Tceal9	1.28e-13	0.341161	1	0.986	2.45e-09	3.04e-27	0.426362	1	0.985	5.83e-23	1.28e-13	6.08e-27
Mdk	7.95e-10	0.374675	1	0.998	1.52e-05	2.48e-20	0.423525	1	0.992	4.75e-16	7.95e-10	4.96e-20
Ube2c	0.00209937	0.280712	0.887	0.682	1	0.000823347	0.421497	0.782	0.651	1	0.00209937	0.00164602
Ybx1	4.96e-19	0.357051	1	1	9.52e-15	6.51e-28	0.414345	1	1	1.25e-23	4.96e-19	1.3e-27
Hmgb2	2.54e-07	0.385478	1	0.967	0.00487106	1.78e-08	0.410041	0.975	0.965	0.000340553	2.54e-07	3.55e-08
Kcnk1	2.05e-24	0.295705	0.549	0.124	3.93e-20	1.68e-45	0.409468	0.563	0.099	3.22e-41	2.05e-24	3.35e-45
Pdia6	2.97e-14	0.40955	1	0.986	5.7e-10	9.93e-22	0.40512	1	0.976	1.9e-17	2.97e-14	1.99e-21
Pcbd1	3.89e-12	0.351578	0.859	0.591	7.46e-08	6.48e-18	0.404599	0.849	0.604	1.24e-13	3.89e-12	1.3e-17
Manf	1.55e-12	0.357392	1	0.923	2.97e-08	2.56e-16	0.402209	0.983	0.88	4.9e-12	1.55e-12	5.11e-16
Sall3	2.52e-48	0.283251	0.338	0.011	4.83e-44	1.31e-62	0.401886	0.42	0.02	2.5e-58	2.52e-48	2.61e-62
Ctbp2	4.07e-06	0.266884	0.887	0.714	0.0780592	5.12e-14	0.393047	0.832	0.639	9.82e-10	4.07e-06	1.02e-13
Pclaf	1.39e-09	0.5023	0.972	0.726	2.67e-05	2.35e-08	0.390765	0.891	0.675	0.000451427	2.35e-08	2.78e-09
Bmyc	0.027062	0.280408	0.761	0.827	1	1.92e-07	0.386648	0.849	0.774	0.00368821	0.027062	3.85e-07
Ltbp1	1.11e-19	0.521485	0.93	0.609	2.13e-15	3.04e-11	0.386255	0.714	0.537	5.83e-07	3.04e-11	2.22e-19
Ptpn13	1.53e-10	0.262946	0.845	0.482	2.92e-06	3e-18	0.379992	0.849	0.517	5.76e-14	1.53e-10	6.01e-18
Lamc1	1.57e-19	0.482019	0.986	0.704	3e-15	2.02e-19	0.37683	0.941	0.656	3.87e-15	2.02e-19	3.13e-19
Rrm2	4.97e-10	0.363568	0.901	0.562	9.52e-06	4.57e-12	0.375837	0.79	0.485	8.76e-08	4.97e-10	9.14e-12
Filip1l	9.61e-13	0.399315	0.507	0.188	1.84e-08	1.59e-18	0.372605	0.58	0.232	3.05e-14	9.61e-13	3.18e-18
Tspan8	4.32e-20	0.407247	0.268	0.031	8.29e-16	1.02e-22	0.372508	0.261	0.035	1.96e-18	4.32e-20	2.04e-22
Spon1	4.16e-27	0.302176	0.38	0.047	7.98e-23	4.33e-51	0.372243	0.403	0.03	8.3e-47	4.16e-27	8.66e-51
Hoxb6	6.59e-16	0.360991	0.93	0.557	1.26e-11	6.11e-18	0.36973	0.832	0.53	1.17e-13	6.59e-16	1.22e-17
Cdh1	7.12e-31	0.298129	0.521	0.086	1.37e-26	1.99e-25	0.367331	0.487	0.133	3.81e-21	1.99e-25	1.42e-30
Lgr5	4.41e-27	0.304761	0.408	0.057	8.46e-23	7.04e-39	0.363986	0.462	0.069	1.35e-34	4.41e-27	1.41e-38
Slc25a5	3.7e-19	0.436432	1	0.981	7.08e-15	2.41e-16	0.363164	0.992	0.971	4.63e-12	2.41e-16	7.39e-19
Mgll	2.04e-25	0.408096	0.563	0.125	3.91e-21	2.08e-32	0.363091	0.555	0.132	3.99e-28	2.04e-25	4.17e-32
Sct	0.000171675	0.325916	0.352	0.187	1	1.67e-06	0.357603	0.311	0.151	0.0320832	0.000171675	3.35e-06
Slco3a1	3.36e-21	0.497784	0.817	0.378	6.45e-17	1.79e-11	0.355109	0.605	0.36	3.43e-07	1.79e-11	6.73e-21
Rrbp1	3.06e-12	0.411322	0.986	0.941	5.86e-08	3.11e-10	0.353806	0.966	0.915	5.96e-06	3.11e-10	6.12e-12
Mapk13	4.01e-21	0.267815	0.577	0.151	7.68e-17	3.3e-27	0.353101	0.58	0.18	6.34e-23	4.01e-21	6.61e-27
Lamc2	3.69e-46	0.375126	0.592	0.07	7.07e-42	7.58e-53	0.353048	0.571	0.08	1.45e-48	3.69e-46	1.52e-52
Kras	1.2e-14	0.390531	0.944	0.793	2.31e-10	4.21e-14	0.352205	0.933	0.743	8.08e-10	4.21e-14	2.41e-14
Papss2	1.01e-39	0.544105	0.648	0.113	1.93e-35	3.43e-34	0.349279	0.471	0.088	6.58e-30	3.43e-34	2.01e-39
Tubb4b	0.0010303	0.271617	0.944	0.872	1	1.02e-05	0.344596	0.933	0.831	0.195445	0.0010303	2.04e-05
Ly6e	9.03e-07	0.263905	0.662	0.468	0.0173059	1.64e-11	0.342262	0.697	0.447	3.15e-07	9.03e-07	3.29e-11
Arl6ip1	0.000462731	0.274809	0.93	0.839	1	1.1e-06	0.341547	0.941	0.858	0.021093	0.000462731	2.2e-06
Cycs	2.51e-08	0.29896	1	0.904	0.000481932	3.56e-11	0.338957	0.958	0.854	6.83e-07	2.51e-08	7.13e-11
Emb	8.78e-18	0.312857	0.634	0.223	1.68e-13	3.04e-22	0.333516	0.546	0.189	5.83e-18	8.78e-18	6.08e-22
Bmp7	1.24e-07	0.290254	0.775	0.553	0.00238498	1.8e-11	0.33347	0.697	0.481	3.45e-07	1.24e-07	3.6e-11
Hist1h2ae	0.000160437	0.300037	0.887	0.703	1	0.000987006	0.331579	0.756	0.65	1	0.000987006	0.000320848
Sorbs2	2.21e-14	0.327558	0.831	0.43	4.25e-10	6.81e-16	0.329198	0.655	0.349	1.3e-11	2.21e-14	1.36e-15
Krt18	1.2e-07	0.39136	0.606	0.333	0.00230228	3.86e-14	0.325628	0.563	0.277	7.4e-10	1.2e-07	7.72e-14
Lsr	8.29e-15	0.316037	0.803	0.431	1.59e-10	3.3e-24	0.323928	0.782	0.376	6.33e-20	8.29e-15	6.6e-24
Arl4c	2.56e-14	0.403035	0.873	0.464	4.91e-10	1.64e-17	0.32295	0.857	0.504	3.14e-13	2.56e-14	3.27e-17
Taldo1	5.95e-13	0.358273	1	0.949	1.14e-08	2.67e-16	0.316169	0.966	0.911	5.12e-12	5.95e-13	5.35e-16
Cdk1	6.33e-06	0.298437	0.901	0.661	0.121444	8.03e-05	0.315336	0.756	0.623	1	8.03e-05	1.27e-05
Nppc	7.41e-40	0.408608	0.38	0.025	1.42e-35	9.74e-24	0.314626	0.227	0.023	1.87e-19	9.74e-24	1.48e-39
Ezr	4.86e-14	0.445622	0.972	0.792	9.32e-10	4.62e-17	0.314622	0.992	0.827	8.85e-13	4.86e-14	9.24e-17
Jag1	6.71e-12	0.309911	0.69	0.305	1.29e-07	3.98e-16	0.314032	0.706	0.344	7.63e-12	6.71e-12	7.96e-16
Gipc1	1.59e-10	0.377128	0.958	0.844	3.05e-06	5.55e-15	0.312208	0.95	0.8	1.06e-10	1.59e-10	1.11e-14
Cyb5a	4.88e-12	0.297527	0.986	0.866	9.36e-08	1.09e-13	0.310442	0.941	0.867	2.09e-09	4.88e-12	2.19e-13
Vmp1	1.77e-08	0.273812	0.901	0.728	0.000339739	1.39e-11	0.309819	0.882	0.702	2.67e-07	1.77e-08	2.79e-11
Frmd4a	5.06e-10	0.332033	0.845	0.562	9.7e-06	1.75e-10	0.308198	0.782	0.559	3.36e-06	5.06e-10	3.5e-10
Txn1	3.29e-11	0.262889	1	0.998	6.3e-07	3.76e-17	0.306917	1	0.99	7.22e-13	3.29e-11	7.53e-17
Psph	0.0185624	0.252252	0.493	0.421	1	1.63e-06	0.306839	0.647	0.435	0.0312292	0.0185624	3.26e-06
Cdh3	1.36e-30	0.367826	0.62	0.131	2.61e-26	3.23e-41	0.305709	0.563	0.107	6.19e-37	1.36e-30	6.46e-41
Dstn	3.09e-11	0.33111	1	0.971	5.92e-07	1.26e-17	0.305223	0.992	0.975	2.42e-13	3.09e-11	2.52e-17
Grb7	5.37e-39	0.308623	0.704	0.124	1.03e-34	1.44e-33	0.30188	0.655	0.179	2.76e-29	1.44e-33	1.07e-38
Hnf1b	6.14e-18	0.326491	0.634	0.191	1.18e-13	8.14e-20	0.301685	0.714	0.286	1.56e-15	6.14e-18	1.63e-19
Plet1	4.42e-42	0.395431	0.465	0.041	8.48e-38	2.21e-44	0.300856	0.336	0.021	4.23e-40	4.42e-42	4.41e-44
Spint1	9.81e-41	0.250076	0.507	0.055	1.88e-36	6.99e-46	0.298414	0.529	0.078	1.34e-41	9.81e-41	1.4e-45
Nasp	5.39e-12	0.424016	1	0.975	1.03e-07	5.76e-10	0.297494	0.992	0.921	1.1e-05	5.76e-10	1.08e-11
H2afj	4.29e-10	0.26004	0.986	0.824	8.23e-06	1.01e-12	0.291666	0.924	0.829	1.93e-08	4.29e-10	2.01e-12
Itga1	3.75e-18	0.267016	0.662	0.219	7.18e-14	7.72e-18	0.290957	0.63	0.273	1.48e-13	7.72e-18	7.49e-18
Top2a	1.25e-05	0.302978	0.915	0.65	0.240522	6.67e-05	0.290826	0.79	0.633	1	6.67e-05	2.51e-05
Ywhaq	2.8e-12	0.283007	1	0.994	5.37e-08	2.97e-16	0.290636	1	0.988	5.69e-12	2.8e-12	5.94e-16
Krt8	5.79e-11	0.258113	0.451	0.161	1.11e-06	2.18e-19	0.288311	0.563	0.217	4.19e-15	5.79e-11	4.37e-19
Bach2	7.24e-10	0.47523	0.676	0.399	1.39e-05	3.66e-08	0.28816	0.588	0.384	0.000701459	3.66e-08	1.45e-09
Lef1	1.42e-20	0.388206	0.718	0.246	2.73e-16	2.12e-11	0.287011	0.454	0.206	4.06e-07	2.12e-11	2.85e-20
Gata3	2.41e-07	0.369623	0.211	0.058	0.00461506	4.33e-14	0.286832	0.227	0.047	8.3e-10	2.41e-07	8.66e-14
Cldn3	1.89e-34	0.313001	0.451	0.052	3.63e-30	4.73e-46	0.286585	0.445	0.05	9.07e-42	1.89e-34	9.47e-46
Syne2	1.13e-08	0.275934	0.845	0.542	0.000216925	9.03e-10	0.286192	0.807	0.543	1.73e-05	1.13e-08	1.81e-09
Trim2	7.18e-14	0.361658	0.817	0.45	1.38e-09	2.87e-19	0.285858	0.756	0.395	5.51e-15	7.18e-14	5.75e-19
Bex2	2.71e-10	0.39988	0.704	0.394	5.19e-06	1.5e-08	0.282782	0.613	0.391	0.000288397	1.5e-08	5.42e-10
Spc24	3.34e-06	0.254477	0.901	0.668	0.0640785	5.5e-07	0.281527	0.798	0.614	0.0105373	3.34e-06	1.1e-06
Tmem238	6.15e-10	0.286851	0.676	0.403	1.18e-05	5.06e-13	0.281326	0.647	0.384	9.69e-09	6.15e-10	1.01e-12
Tma7	6.45e-10	0.252689	1	0.993	1.24e-05	7.54e-18	0.28095	0.992	0.983	1.45e-13	6.45e-10	1.51e-17
Smc2	8.88e-06	0.281657	0.901	0.743	0.170188	3.48e-05	0.275809	0.824	0.694	0.666586	3.48e-05	1.78e-05
Tyms	5.62e-08	0.347001	0.93	0.756	0.00107734	3.9e-07	0.273866	0.857	0.697	0.00747894	3.9e-07	1.12e-07
Crip1	7.79e-09	0.391357	0.859	0.699	0.000149329	1.14e-09	0.272568	0.798	0.611	2.19e-05	7.79e-09	2.29e-09
Rmst	2.47e-30	0.548233	0.62	0.127	4.73e-26	8.82e-12	0.268796	0.286	0.087	1.69e-07	8.82e-12	4.93e-30
Prdm16	5.89e-57	0.250283	0.423	0.017	1.13e-52	3.83e-68	0.266029	0.462	0.023	7.35e-64	5.89e-57	7.66e-68
Ube2s	4.64e-07	0.26183	1	0.982	0.00889965	1.17e-05	0.265323	0.992	0.972	0.224526	1.17e-05	9.28e-07
Hmgb1	2.49e-08	0.260093	1	1	0.000477707	3.46e-11	0.258113	1	1	6.63e-07	2.49e-08	6.92e-11
Dkk1	4.34e-12	0.440998	0.423	0.133	8.32e-08	2.86e-10	0.257568	0.387	0.155	5.49e-06	2.86e-10	8.68e-12
Uncx	0.000685174	0.310487	0.859	0.91	1	0.22005	0.25701	0.782	0.888	1	0.22005	0.00136988
Fkbp4	3.27e-10	0.292662	1	0.991	6.28e-06	6.86e-11	0.256698	1	0.977	1.32e-06	3.27e-10	1.37e-10
Lhfp	1.75e-06	-0.289363	0.324	0.538	0.0334882	1.18e-08	-0.252296	0.218	0.469	0.000226202	1.75e-06	2.36e-08
Hs3st6	5.64e-06	-0.272025	0.451	0.615	0.108063	2.61e-07	-0.259586	0.319	0.551	0.00501031	5.64e-06	5.23e-07
Bgn	0.00571064	-0.325058	0.254	0.361	1	0.000225268	-0.261788	0.176	0.308	1	0.00571064	0.000450486
Gxylt2	2.9e-05	-0.266764	0.493	0.609	0.556105	1.56e-06	-0.270538	0.395	0.561	0.0299064	2.9e-05	3.12e-06
Hoxc9	2.84e-06	-0.264363	0.803	0.855	0.0544263	2.01e-09	-0.272649	0.613	0.825	3.85e-05	2.84e-06	4.01e-09
Rps26	1.11e-13	-0.27586	1	1	2.12e-09	7.36e-19	-0.274414	1	1	1.41e-14	1.11e-13	1.47e-18
Meis1	1.5e-07	-0.270447	0.268	0.55	0.00288164	2.33e-15	-0.283705	0.151	0.54	4.46e-11	1.5e-07	4.65e-15
Hoxc6	4.68e-08	-0.303349	0.507	0.718	0.000897596	1.27e-11	-0.284324	0.412	0.683	2.43e-07	4.68e-08	2.53e-11
Cnn2	0.022295	-0.311951	0.479	0.538	1	0.00387963	-0.295644	0.403	0.469	1	0.022295	0.0077442
Gpc6	4.1e-08	-0.33256	0.676	0.846	0.00078568	3.67e-08	-0.297188	0.706	0.807	0.000703747	4.1e-08	7.34e-08
Osr1	5.46e-13	-0.434696	0.113	0.56	1.05e-08	6.52e-15	-0.298081	0.05	0.426	1.25e-10	5.46e-13	1.3e-14
Cpxm1	1.94e-10	-0.398815	0.577	0.801	3.72e-06	1.82e-11	-0.298788	0.487	0.729	3.5e-07	1.94e-10	3.65e-11
Selenom	0.00407293	-0.255473	0.535	0.573	1	3.08e-08	-0.308842	0.336	0.541	0.000590215	0.00407293	6.16e-08
Foxd1	2.9e-09	-0.365271	0.113	0.455	5.56e-05	2.06e-10	-0.311751	0.109	0.398	3.96e-06	2.9e-09	4.13e-10
Eya4	8.88e-09	-0.304086	0.366	0.641	0.000170339	3.72e-13	-0.314631	0.244	0.579	7.13e-09	8.88e-09	7.44e-13
Igfbp2	6.36e-11	-0.352113	0.732	0.887	1.22e-06	1.62e-08	-0.317302	0.58	0.767	0.000310977	1.62e-08	1.27e-10
Ifitm1	7.99e-07	-0.259571	0.225	0.483	0.0153237	2.5e-10	-0.318993	0.126	0.413	4.78e-06	7.99e-07	4.99e-10
Tcf21	3.88e-06	-0.29373	0.268	0.504	0.0743288	9.81e-11	-0.322541	0.16	0.46	1.88e-06	3.88e-06	1.96e-10
Eif3m	2.72e-08	-0.269475	1	0.996	0.000520687	3.66e-14	-0.32441	0.992	0.998	7.02e-10	2.72e-08	7.32e-14
Gucy1a1	0.00262908	-0.271661	0.239	0.376	1	2.4e-07	-0.327933	0.151	0.373	0.00459553	0.00262908	4.79e-07
Zeb1	1.86e-08	-0.264817	0.268	0.597	0.000357591	3.67e-15	-0.328802	0.185	0.561	7.03e-11	1.86e-08	7.34e-15
Fn1	0.69164	-0.31207	0.606	0.523	1	0.00651607	-0.329463	0.387	0.44	1	0.69164	0.0129897
Pmp22	4.92e-05	-0.330713	0.155	0.376	0.942956	5.36e-09	-0.333272	0.076	0.329	0.000102677	4.92e-05	1.07e-08
Acot1	1.6e-06	-0.314579	0.817	0.865	0.0306355	1.8e-13	-0.337746	0.647	0.834	3.45e-09	1.6e-06	3.6e-13
Gpc3	1.45e-05	-0.30127	0.944	0.976	0.277971	1.64e-10	-0.340357	0.975	0.976	3.15e-06	1.45e-05	3.28e-10
Slc25a4	3.42e-14	-0.271018	1	1	6.56e-10	2.59e-24	-0.346864	1	0.998	4.97e-20	3.42e-14	5.18e-24
Hoxc8	3e-11	-0.399936	0.577	0.823	5.76e-07	6.13e-12	-0.347504	0.546	0.759	1.18e-07	3e-11	1.23e-11
Cfh	0.00779824	-0.336028	0.183	0.298	1	1.74e-05	-0.34756	0.109	0.275	0.332811	0.00779824	3.47e-05
Cntfr	4.85e-13	-0.348807	0.239	0.663	9.3e-09	2.84e-18	-0.348087	0.143	0.57	5.45e-14	4.85e-13	5.69e-18
Fosb	5.2e-05	-0.289278	0.31	0.529	0.997583	1.83e-06	-0.353552	0.429	0.59	0.0351595	5.2e-05	3.67e-06
Lpin2	3.95e-07	-0.267711	0.634	0.82	0.00757741	5.57e-13	-0.353556	0.571	0.784	1.07e-08	3.95e-07	1.11e-12
Mest	0.00187632	-0.346967	0.972	0.943	1	0.00183444	-0.354806	0.882	0.864	1	0.00187632	0.00366552
Dst	1.83e-06	-0.333879	0.69	0.814	0.0350112	6.32e-10	-0.355296	0.672	0.816	1.21e-05	1.83e-06	1.26e-09
Foxp1	2.9e-09	-0.356636	0.845	0.926	5.55e-05	2.7e-14	-0.355622	0.773	0.903	5.17e-10	2.9e-09	5.4e-14
Fcgrt	3.1e-08	-0.259109	0.521	0.749	0.000594755	5.48e-15	-0.355836	0.37	0.699	1.05e-10	3.1e-08	1.1e-14
Tshz1	6.29e-11	-0.32472	0.324	0.675	1.21e-06	4.14e-18	-0.359809	0.244	0.661	7.94e-14	6.29e-11	8.28e-18
Tshz2	1.11e-09	-0.389494	0.662	0.942	2.12e-05	6.14e-14	-0.36013	0.597	0.923	1.18e-09	1.11e-09	1.23e-13
Slc12a2	9.33e-12	-0.380592	0.493	0.758	1.79e-07	1.57e-12	-0.369724	0.387	0.659	3.01e-08	9.33e-12	3.14e-12
Hoxc10	3.3e-14	-0.476025	0.887	0.921	6.33e-10	1.37e-12	-0.369749	0.782	0.912	2.62e-08	1.37e-12	6.6e-14
Snap91	2.09e-11	-0.32622	0.127	0.564	4.01e-07	6.67e-17	-0.370551	0.126	0.543	1.28e-12	2.09e-11	1.33e-16
Plat	1.31e-10	-0.394904	0.31	0.652	2.51e-06	5.42e-18	-0.386097	0.143	0.557	1.04e-13	1.31e-10	1.08e-17
Grb10	1.39e-08	-0.330155	0.944	0.987	0.000267459	4.41e-16	-0.386999	0.95	0.968	8.46e-12	1.39e-08	8.83e-16
Meg3	0.000183043	-0.630006	0.268	0.43	1	0.000231572	-0.390955	0.16	0.304	1	0.000231572	0.000366053
Id3	5.71e-05	-0.314258	0.901	0.969	1	1.07e-07	-0.391386	0.857	0.96	0.00204594	5.71e-05	2.13e-07
Bbx	3.23e-09	-0.364962	0.817	0.887	6.19e-05	2e-15	-0.391884	0.647	0.88	3.83e-11	3.23e-09	4e-15
Kif26b	1.18e-08	-0.351454	0.324	0.629	0.000225873	4.67e-16	-0.39506	0.21	0.579	8.95e-12	1.18e-08	9.34e-16
Tril	2.4e-06	-0.367047	0.521	0.759	0.0461092	6.06e-13	-0.39556	0.345	0.689	1.16e-08	2.4e-06	1.21e-12
Rspo3	2.15e-05	-0.349866	0.155	0.385	0.412641	2.51e-11	-0.395843	0.067	0.369	4.8e-07	2.15e-05	5.01e-11
Dcn	0.00613511	-0.548184	0.31	0.42	1	0.0022272	-0.397876	0.143	0.255	1	0.00613511	0.00444943
Id1	0.00012719	-0.378338	0.563	0.708	1	6.52e-07	-0.398945	0.597	0.752	0.0124954	0.00012719	1.3e-06
Jun	0.051532	-0.269385	0.972	0.88	1	0.000196373	-0.400637	0.899	0.876	1	0.051532	0.000392708
Unc5c	1.18e-12	-0.357476	0.38	0.745	2.26e-08	2.08e-19	-0.401202	0.244	0.678	3.99e-15	1.18e-12	4.16e-19
Junb	0.000224469	-0.347455	0.549	0.682	1	9.59e-05	-0.401411	0.672	0.725	1	0.000224469	0.000191885
Traf1	8.74e-09	-0.360704	0.127	0.48	0.000167531	4.89e-11	-0.405461	0.134	0.433	9.37e-07	8.74e-09	9.78e-11
Phgdh	2.51e-05	-0.282423	0.986	0.986	0.481896	8.82e-07	-0.406186	0.958	0.976	0.0169087	2.51e-05	1.76e-06
Osr2	0.00178459	-0.339012	0.169	0.318	1	1.37e-09	-0.408637	0.101	0.375	2.63e-05	0.00178459	2.74e-09
Mgp	0.000227725	-0.26708	0.352	0.512	1	4.73e-09	-0.410969	0.21	0.462	9.06e-05	0.000227725	9.45e-09
Il33	5.45e-06	-0.281702	0.085	0.33	0.10444	2.4e-13	-0.411798	0.05	0.397	4.61e-09	5.45e-06	4.81e-13
Eya1	1.33e-10	-0.405882	0.324	0.688	2.55e-06	4.12e-18	-0.423741	0.218	0.631	7.9e-14	1.33e-10	8.24e-18
Zbtb20	1.5e-06	-0.365804	0.845	0.915	0.0288083	7.43e-13	-0.42958	0.731	0.898	1.43e-08	1.5e-06	1.49e-12
Sncaip	6.47e-16	-0.455542	0.282	0.733	1.24e-11	2.23e-25	-0.438233	0.168	0.684	4.27e-21	6.47e-16	4.46e-25
Palld	1.21e-10	-0.417651	0.254	0.617	2.32e-06	6.65e-19	-0.442669	0.227	0.639	1.28e-14	1.21e-10	1.33e-18
Acaa2	1.73e-16	-0.50948	0.803	0.947	3.32e-12	9.5e-18	-0.447605	0.832	0.934	1.82e-13	1.73e-16	1.9e-17
Peg3	0.000224812	-0.442974	0.887	0.864	1	0.000154817	-0.452154	0.773	0.809	1	0.000224812	0.00030961
Gm266	6.63e-08	-0.399162	0.93	0.949	0.00127083	2.28e-11	-0.452926	0.739	0.905	4.37e-07	6.63e-08	4.55e-11
Foxc2	6.52e-09	-0.400084	0.394	0.644	0.000125086	2.66e-17	-0.453848	0.244	0.617	5.1e-13	6.52e-09	5.32e-17
Fam213a	5.66e-11	-0.518105	0.606	0.828	1.08e-06	5.62e-10	-0.454913	0.681	0.796	1.08e-05	5.62e-10	1.13e-10
Tmem100	6.03e-07	-0.345009	0.211	0.524	0.0115571	9.14e-14	-0.45517	0.118	0.474	1.75e-09	6.03e-07	1.83e-13
Hmcn1	6.39e-14	-0.544624	0.423	0.724	1.23e-09	9.18e-16	-0.455585	0.319	0.66	1.76e-11	6.39e-14	1.84e-15
Vcan	4.17e-07	-0.373428	0.873	0.965	0.00798821	9.13e-13	-0.45964	0.639	0.926	1.75e-08	4.17e-07	1.83e-12
Mfap4	4.18e-14	-0.557431	0.394	0.754	8.01e-10	1.54e-16	-0.475197	0.294	0.642	2.96e-12	4.18e-14	3.09e-16
Emp3	2.4e-13	-0.57645	0.324	0.681	4.6e-09	4.77e-18	-0.50186	0.294	0.657	9.15e-14	2.4e-13	9.55e-18
Rspo1	2.23e-16	-0.520501	0.535	0.881	4.27e-12	6.39e-21	-0.503123	0.395	0.822	1.22e-16	2.23e-16	1.28e-20
Myl9	2.04e-05	-0.478965	0.338	0.53	0.391465	2.5e-07	-0.505027	0.252	0.458	0.0047866	2.04e-05	4.99e-07
Ptprd	2.08e-13	-0.465047	0.451	0.755	3.98e-09	1.1e-23	-0.508546	0.261	0.689	2.1e-19	2.08e-13	2.19e-23
H19	6.18e-06	-0.413837	0.831	0.921	0.118578	6.19e-12	-0.512951	0.605	0.833	1.19e-07	6.18e-06	1.24e-11
Zeb2	4.97e-07	-0.488722	0.38	0.633	0.00952284	2.48e-15	-0.518515	0.328	0.652	4.75e-11	4.97e-07	4.96e-15
Crym	8.89e-10	-0.598029	0.324	0.677	1.7e-05	1.4e-13	-0.523436	0.269	0.62	2.69e-09	8.89e-10	2.81e-13
Penk	0.00221308	-0.636405	0.225	0.362	1	0.0106164	-0.528152	0.218	0.303	1	0.0106164	0.00442125
Ccnd2	7.32e-05	-0.308877	0.732	0.842	1	1.09e-11	-0.530224	0.605	0.791	2.09e-07	7.32e-05	2.18e-11
Cldn5	0.622571	-0.435684	0.437	0.35	1	0.369991	-0.548024	0.345	0.331	1	0.622571	0.603089
Wnt4	0.222202	-0.336127	0.549	0.551	1	0.00010537	-0.555382	0.437	0.549	1	0.222202	0.000210729
Egr1	7.3e-05	-0.400081	0.831	0.853	1	1.86e-14	-0.559262	0.748	0.883	3.57e-10	7.3e-05	3.72e-14
Fxyd6	1.12e-08	-0.439371	0.901	0.961	0.000214235	1.64e-17	-0.561671	0.731	0.925	3.14e-13	1.12e-08	3.28e-17
Cald1	6.25e-06	-0.346676	0.761	0.862	0.119797	2.44e-17	-0.562373	0.487	0.779	4.68e-13	6.25e-06	4.88e-17
Nr2f2	2.81e-16	-0.567659	0.859	0.979	5.38e-12	2.16e-22	-0.562842	0.815	0.963	4.13e-18	2.81e-16	4.31e-22
Ttc28	9.66e-16	-0.763596	0.577	0.846	1.85e-11	2.56e-16	-0.575874	0.513	0.779	4.9e-12	9.66e-16	5.11e-16
Akap12	1.84e-05	-0.436013	0.423	0.614	0.35312	9e-12	-0.585576	0.395	0.614	1.73e-07	1.84e-05	1.8e-11
Col1a1	0.00995544	-0.738778	0.606	0.586	1	0.00141799	-0.588445	0.328	0.421	1	0.00995544	0.00283397
Mafb	0.000828665	-0.511242	0.183	0.363	1	3.21e-08	-0.591093	0.143	0.387	0.000614661	0.000828665	6.41e-08
C1qtnf12	0.00169966	-0.370521	0.873	0.845	1	6.81e-12	-0.59542	0.613	0.781	1.3e-07	0.00169966	1.36e-11
Lgals1	0.00185312	-0.571749	0.732	0.729	1	5.46e-09	-0.602053	0.504	0.661	0.000104616	0.00185312	1.09e-08
Clmp	3.12e-19	-0.66143	0.352	0.787	5.99e-15	7.68e-28	-0.603094	0.193	0.719	1.47e-23	3.12e-19	1.54e-27
Spock2	8.54e-15	-0.693623	0.493	0.821	1.64e-10	2.35e-21	-0.625112	0.345	0.748	4.5e-17	8.54e-15	4.7e-21
Alcam	7.77e-14	-0.570906	0.479	0.783	1.49e-09	2.66e-26	-0.635745	0.303	0.739	5.1e-22	7.77e-14	5.32e-26
Cped1	3.72e-15	-0.60535	0.324	0.77	7.13e-11	7.59e-21	-0.640683	0.319	0.717	1.46e-16	3.72e-15	1.52e-20
S100a11	6.17e-20	-0.590832	0.831	0.961	1.18e-15	5.07e-32	-0.6554	0.748	0.96	9.73e-28	6.17e-20	1.01e-31
Col3a1	0.00694715	-0.74624	0.507	0.532	1	7.67e-08	-0.666626	0.185	0.407	0.00147015	0.00694715	1.53e-07
Btg2	2.28e-07	-0.576943	0.549	0.699	0.00436458	9.23e-12	-0.673105	0.529	0.693	1.77e-07	2.28e-07	1.85e-11
Robo2	5.56e-16	-0.812798	0.451	0.78	1.07e-11	1.9e-18	-0.682017	0.403	0.73	3.65e-14	5.56e-16	3.81e-18
Tagln	0.00291361	-0.464091	0.155	0.308	1	0.00083596	-0.689926	0.227	0.354	1	0.00291361	0.00167122
Cdh11	1.47e-17	-0.684041	0.408	0.827	2.82e-13	2.79e-26	-0.699817	0.328	0.746	5.35e-22	1.47e-17	5.58e-26
Gas1	4.39e-17	-0.795897	0.718	0.947	8.41e-13	5.11e-16	-0.703176	0.815	0.889	9.8e-12	5.11e-16	8.78e-17
Six2	2.06e-15	-0.768319	0.38	0.757	3.94e-11	1.93e-21	-0.708852	0.218	0.692	3.7e-17	2.06e-15	3.86e-21
Col1a2	0.000327556	-0.867725	0.577	0.647	1	0.00642889	-0.724777	0.387	0.446	1	0.00642889	0.000655005
Fos	1.04e-06	-0.584006	0.563	0.721	0.019958	1.78e-11	-0.746258	0.613	0.759	3.41e-07	1.04e-06	3.56e-11
Meis2	2.01e-17	-0.758355	0.69	0.946	3.85e-13	1.03e-28	-0.819682	0.513	0.911	1.97e-24	2.01e-17	2.05e-28
Igfbp5	2.07e-12	-0.990858	0.535	0.81	3.97e-08	1.88e-13	-0.823522	0.538	0.749	3.6e-09	2.07e-12	3.76e-13
Sparc	8.44e-13	-0.563815	0.93	0.993	1.62e-08	2.26e-31	-0.837899	0.798	0.983	4.33e-27	8.44e-13	4.51e-31
Wt1	2.43e-20	-0.7481	0.493	0.923	4.66e-16	1.77e-34	-0.879612	0.353	0.866	3.4e-30	2.43e-20	3.54e-34
Tgfbi	3.25e-15	-0.759049	0.352	0.751	6.22e-11	1.24e-21	-0.882662	0.286	0.691	2.38e-17	3.25e-15	2.48e-21
Vim	1.34e-07	-0.560332	0.845	0.897	0.0025701	3.3e-22	-0.894936	0.639	0.901	6.33e-18	1.34e-07	6.61e-22
Cdkn1c	7.02e-05	-0.881229	0.915	0.943	1	7.56e-11	-0.916186	0.849	0.916	1.45e-06	7.02e-05	1.51e-10
Tpm2	6.08e-15	-0.848804	0.69	0.898	1.17e-10	5.11e-23	-0.969894	0.538	0.848	9.8e-19	6.08e-15	1.02e-22
Acta2	0.0079552	-0.790674	0.648	0.674	1	1.8e-05	-0.97732	0.487	0.6	0.345508	0.0079552	3.6e-05
Cited1	2.04e-07	-1.20784	0.549	0.678	0.00391706	2.5e-08	-1.01769	0.445	0.622	0.000480001	2.04e-07	5.01e-08
Lsp1	5.87e-21	-0.949808	0.606	0.943	1.13e-16	1.73e-30	-1.0729	0.563	0.886	3.32e-26	5.87e-21	3.46e-30
