# Supplementary material for: Smarca4 deficiency induces Pttg1 oncogene upregulation and hyperproliferation of tubular and interstitial cells during kidney development
Source: Front Cell Dev Biol. 2023 Sep 4;11:1233317. doi: 10.3389/fcell.2023.1233317 (PMC10506413; doi:10.3389/fcell.2023.1233317)
Supplement: Supplementary file 8 [file Table7.XLSX]

## Sheet: N.tubule.1_PCT.Mut.CTRL.kmarker
Gene	Mutant_p_val	Mutant_avg_logFC	Mutant_pct.1	Mutant_pct.2	Mutant_p_val_adj	CTRL_p_val	CTRL_avg_logFC	CTRL_pct.1	CTRL_pct.2	CTRL_p_val_adj	max_pval	minimump_p_val
Mettl7b	2.26486e-48	0.833726	0.904	0.139	4.34264e-44	1.27287e-149	0.837697	0.869	0.05	2.44059e-145	2.26486e-48	2.54573e-149
Slc22a1	8.7915e-44	0.824793	0.957	0.226	1.68568e-39	3.30619e-132	0.906994	0.908	0.094	6.33929e-128	8.7915e-44	6.61238e-132
Cyp2d26	2.66044e-45	1.29093	0.968	0.236	5.10112e-41	4.05122e-130	1.33041	0.903	0.103	7.76781e-126	2.66044e-45	8.10244e-130
Slc17a1	9.55744e-45	0.875128	0.872	0.139	1.83254e-40	6.62165e-125	1.01997	0.835	0.076	1.26963e-120	9.55744e-45	1.32433e-124
Them7	1.22501e-26	0.359029	0.468	0.037	2.34882e-22	7.09731e-125	0.813955	0.743	0.043	1.36084e-120	1.22501e-26	1.41946e-124
Slc22a19	7.77886e-35	0.731788	0.84	0.166	1.49152e-30	3.60031e-123	1.10507	0.879	0.106	6.90324e-119	7.77886e-35	7.20063e-123
Gsta2	4.54257e-47	1.34035	0.957	0.213	8.70992e-43	1.34536e-120	1.24365	0.956	0.168	2.57959e-116	4.54257e-47	2.69072e-120
Slc17a3	3.29053e-33	0.614642	0.755	0.149	6.30926e-29	1.03259e-119	0.960865	0.748	0.053	1.97988e-115	3.29053e-33	2.06517e-119
Ass1	7.24206e-42	1.49284	1	0.412	1.38859e-37	1.65813e-115	1.56295	0.981	0.222	3.1793e-111	7.24206e-42	3.31626e-115
Slc22a2	2.62564e-38	0.95844	0.872	0.186	5.0344e-34	6.51815e-115	1.18566	0.927	0.156	1.24979e-110	2.62564e-38	1.30363e-114
Pcx	3.07464e-41	1.06054	0.957	0.304	5.89532e-37	1.16215e-113	0.991589	0.937	0.179	2.22831e-109	3.07464e-41	2.32431e-113
Dao	3.65724e-33	0.752252	0.947	0.301	7.01238e-29	1.642e-112	0.886898	0.922	0.171	3.14838e-108	3.65724e-33	3.28401e-112
Hgd	5.89943e-49	0.678376	0.798	0.057	1.13116e-44	5.31514e-111	0.736702	0.694	0.042	1.01912e-106	5.89943e-49	1.06303e-110
Gatm	6.19496e-44	1.48564	0.968	0.247	1.18782e-39	5.82016e-111	1.49212	0.874	0.133	1.11596e-106	6.19496e-44	1.16403e-110
Slc3a1	1.41206e-44	1.00775	0.926	0.186	2.70748e-40	8.46655e-108	0.988927	0.898	0.158	1.62338e-103	1.41206e-44	1.69331e-107
Cmbl	1.60832e-41	0.705836	0.819	0.149	3.08379e-37	1.87181e-107	0.803336	0.811	0.108	3.589e-103	1.60832e-41	3.74362e-107
Acsm2	2.64138e-32	0.969431	0.936	0.314	5.06459e-28	3.68981e-107	1.48844	0.864	0.136	7.07484e-103	2.64138e-32	7.37962e-107
Slc51b	2.1544e-25	0.366753	0.681	0.155	4.13085e-21	3.35439e-106	0.630474	0.835	0.112	6.43171e-102	2.1544e-25	6.70878e-106
Aldob	1.31556e-42	1.64987	1	0.463	2.52246e-38	7.64144e-106	2.05531	0.995	0.4	1.46517e-101	1.31556e-42	1.52829e-105
Slc34a1	6.91868e-44	1.67246	1	0.368	1.32659e-39	1.02527e-105	1.95793	0.956	0.276	1.96585e-101	6.91868e-44	2.05053e-105
Fbp1	3.27536e-45	1.60646	0.979	0.274	6.28018e-41	1.2082e-101	1.6573	0.995	0.347	2.31661e-97	3.27536e-45	2.4164e-101
Spp2	7.25177e-46	2.0091	1	0.331	1.39045e-41	5.64758e-100	1.81988	0.985	0.332	1.08287e-95	7.25177e-46	1.12952e-99
Slc47a1	4.2621e-36	0.784721	0.915	0.297	8.17216e-32	6.11967e-99	0.795774	0.908	0.229	1.17339e-94	4.2621e-36	1.22393e-98
Cyp2j5	8.85831e-43	1.07197	0.83	0.122	1.69849e-38	2.99685e-98	1.26832	0.879	0.166	5.74615e-94	8.85831e-43	5.99369e-98
Nat8f1	9.3452e-47	1.71055	1	0.368	1.79185e-42	2.34498e-97	1.66057	1	0.45	4.49627e-93	9.3452e-47	4.68997e-97
Pck1	1.22826e-30	0.747526	0.723	0.149	2.35507e-26	2.08144e-96	1.23	0.903	0.193	3.99096e-92	1.22826e-30	4.16288e-96
Mogat2	1.41014e-28	0.39534	0.606	0.091	2.7038e-24	8.7504e-96	0.571758	0.65	0.05	1.6778e-91	1.41014e-28	1.75008e-95
Mep1b	1.11318e-25	0.746074	0.702	0.142	2.13441e-21	3.74396e-95	1.14043	0.728	0.083	7.17867e-91	1.11318e-25	7.48792e-95
Fmo2	4.7383e-28	0.483848	0.681	0.142	9.08521e-24	4.40322e-95	0.767419	0.738	0.09	8.44273e-91	4.7383e-28	8.80644e-95
Gm10639	2.9237e-45	1.43668	0.989	0.311	5.6059e-41	5.82015e-95	1.07419	0.951	0.23	1.11596e-90	2.9237e-45	1.16403e-94
Cldn2	1.9275e-41	0.955688	0.979	0.304	3.69579e-37	6.76033e-95	0.912916	0.917	0.225	1.29623e-90	1.9275e-41	1.35207e-94
Slc4a4	1.39263e-39	1.15333	0.979	0.405	2.67023e-35	3.45334e-94	1.10208	0.976	0.362	6.62143e-90	1.39263e-39	6.90668e-94
Erich4	2.84061e-40	0.536551	0.745	0.084	5.44659e-36	1.5207e-93	0.581915	0.631	0.049	2.91579e-89	2.84061e-40	3.0414e-93
Hsd17b2	7.30257e-15	0.292379	0.362	0.057	1.40019e-10	8.64389e-93	0.610155	0.617	0.044	1.65738e-88	7.30257e-15	1.72878e-92
Tmem174	5.53325e-39	1.10831	0.979	0.321	1.06095e-34	2.17542e-92	1.14202	0.99	0.318	4.17116e-88	5.53325e-39	4.35085e-92
Fah	5.07578e-42	0.808614	0.904	0.209	9.73231e-38	4.50414e-92	0.869771	0.874	0.205	8.63623e-88	5.07578e-42	9.00827e-92
Fitm1	1.89471e-25	0.477624	0.649	0.149	3.63292e-21	5.11611e-91	0.589973	0.646	0.061	9.80963e-87	1.89471e-25	1.02322e-90
Gpd1	1.94866e-37	0.821857	0.968	0.351	3.73635e-33	8.3604e-91	0.763707	0.888	0.214	1.60302e-86	1.94866e-37	1.67208e-90
Slc6a20b	2.01169e-31	0.47685	0.681	0.111	3.85721e-27	2.90162e-90	0.538888	0.684	0.075	5.56356e-86	2.01169e-31	5.80324e-90
Tkfc	8.45699e-38	0.909781	0.968	0.395	1.62154e-33	1.02695e-89	0.950623	0.947	0.36	1.96907e-85	8.45699e-38	2.0539e-89
Fmo1	1.18357e-32	0.821468	0.915	0.277	2.26937e-28	1.31557e-89	0.897272	0.932	0.24	2.52248e-85	1.18357e-32	2.63115e-89
Pdzk1	4.5706e-35	1.10191	1	0.49	8.76368e-31	4.51334e-89	1.29777	1	0.509	8.65388e-85	4.5706e-35	9.02668e-89
Tmem150a	1.69105e-39	0.904473	0.957	0.311	3.24242e-35	6.92475e-89	0.863782	0.908	0.291	1.32775e-84	1.69105e-39	1.38495e-88
Cda	9.81246e-26	0.520853	0.649	0.152	1.88144e-21	1.53884e-88	0.601933	0.772	0.119	2.95056e-84	9.81246e-26	3.07767e-88
Aqp1	3.31621e-18	0.453056	0.681	0.206	6.3585e-14	1.60614e-88	0.827207	0.748	0.112	3.07962e-84	3.31621e-18	3.21229e-88
Cryl1	1.17182e-37	0.980442	0.904	0.304	2.24685e-33	3.88113e-88	0.888781	0.796	0.164	7.44168e-84	1.17182e-37	7.76226e-88
Lrp2	2.45878e-38	1.51122	1	0.547	4.71447e-34	3.15368e-87	1.54047	0.976	0.45	6.04687e-83	2.45878e-38	6.30736e-87
Dbi	1.0968e-36	1.05278	1	0.899	2.10301e-32	5.13843e-87	1.12683	1	0.961	9.85242e-83	1.0968e-36	1.02769e-86
Slc22a6	1.29158e-47	1.15043	0.989	0.267	2.47647e-43	6.4595e-87	1.36812	0.956	0.343	1.23854e-82	1.29158e-47	1.2919e-86
Kcnj15	6.67581e-34	0.648205	0.755	0.155	1.28002e-29	1.43089e-86	0.605931	0.723	0.109	2.7436e-82	6.67581e-34	2.86179e-86
Spink1	1.21743e-31	1.08916	1	0.436	2.3343e-27	1.41833e-85	1.26405	0.976	0.357	2.71951e-81	1.21743e-31	2.83666e-85
Tmem252	8.38638e-22	0.472055	0.787	0.274	1.608e-17	2.4214e-85	0.92548	0.917	0.234	4.6428e-81	8.38638e-22	4.84281e-85
Tmem37	5.29352e-27	0.826668	0.957	0.591	1.01498e-22	9.32971e-85	1.0434	0.966	0.37	1.78888e-80	5.29352e-27	1.86594e-84
Slc22a8	8.86812e-38	0.703686	0.872	0.206	1.70037e-33	1.57275e-84	0.778416	0.699	0.095	3.0156e-80	8.86812e-38	3.14551e-84
Slc5a11	1.67088e-23	0.36407	0.468	0.054	3.20375e-19	2.43625e-84	0.338267	0.505	0.023	4.67127e-80	1.67088e-23	4.8725e-84
Tst	9.76227e-31	0.936435	0.957	0.557	1.87182e-26	2.63185e-84	1.16727	0.976	0.556	5.04632e-80	9.76227e-31	5.26371e-84
Susd3	8.48888e-18	0.426975	0.777	0.277	1.62766e-13	4.23822e-84	0.750999	0.883	0.208	8.12636e-80	8.48888e-18	8.47644e-84
Qdpr	1.78461e-35	0.909869	1	0.733	3.4218e-31	5.63545e-84	0.968067	1	0.736	1.08054e-79	1.78461e-35	1.12709e-83
Acsm1	1.16442e-44	0.774323	0.713	0.054	2.23265e-40	8.81746e-84	0.858876	0.718	0.111	1.69066e-79	1.16442e-44	1.76349e-83
Defb19	3.56092e-31	0.845277	0.681	0.108	6.82771e-27	1.28306e-83	0.733222	0.612	0.054	2.46014e-79	3.56092e-31	2.56612e-83
Cdhr5	2.80572e-21	0.325805	0.755	0.25	5.37969e-17	1.45202e-83	0.574945	0.733	0.118	2.7841e-79	2.80572e-21	2.90404e-83
Ush1c	1.3061e-20	0.362382	0.819	0.341	2.50431e-16	3.87568e-83	0.588382	0.786	0.147	7.43122e-79	1.3061e-20	7.75135e-83
Abcc2	4.34878e-34	0.638369	0.83	0.186	8.33835e-30	4.11928e-83	0.5032	0.612	0.062	7.8983e-79	4.34878e-34	8.23855e-83
Tcn2	1.35672e-35	1.1141	0.989	0.635	2.60138e-31	6.35825e-83	1.07227	0.981	0.682	1.21913e-78	1.35672e-35	1.27165e-82
Galnt11	1.98496e-32	0.944232	0.979	0.581	3.80597e-28	1.60285e-82	1.09969	0.985	0.59	3.0733e-78	1.98496e-32	3.2057e-82
Mep1a	2.0009e-34	1.15866	0.989	0.372	3.83652e-30	1.71638e-82	1.22117	0.995	0.42	3.29098e-78	2.0009e-34	3.43276e-82
Sod3	3.29792e-33	0.629839	0.851	0.213	6.32343e-29	9.85893e-82	0.773326	0.859	0.222	1.89035e-77	3.29792e-33	1.97179e-81
Ttc36	5.25649e-36	1.44404	1	0.645	1.00788e-31	1.39584e-81	1.47667	1	0.714	2.67639e-77	5.25649e-36	2.79168e-81
Sardh	7.40377e-27	0.57665	0.872	0.416	1.4196e-22	6.9777e-81	0.685456	0.859	0.235	1.3379e-76	7.40377e-27	1.39554e-80
Dcxr	1.71021e-31	0.739047	0.936	0.486	3.27917e-27	1.92096e-80	0.900832	0.947	0.475	3.68325e-76	1.71021e-31	3.84192e-80
Sucnr1	2.28996e-24	0.438404	0.628	0.128	4.39077e-20	6.13705e-80	0.429976	0.583	0.052	1.17672e-75	2.28996e-24	1.22741e-79
Msra	5.83749e-19	0.391827	0.809	0.402	1.11928e-14	3.45031e-79	0.610974	0.888	0.284	6.61562e-75	5.83749e-19	6.90061e-79
Acot13	2.90334e-29	0.731385	0.979	0.736	5.56686e-25	5.4851e-79	0.968392	0.995	0.776	1.05171e-74	2.90334e-29	1.09702e-78
Slc7a7	6.83254e-32	0.782986	0.766	0.166	1.31007e-27	8.49333e-79	0.672364	0.587	0.057	1.62851e-74	6.83254e-32	1.69867e-78
Car2	3.33962e-31	0.857736	0.936	0.432	6.40339e-27	1.62404e-78	1.1811	0.913	0.311	3.11393e-74	3.33962e-31	3.24808e-78
Eci3	3.86151e-26	0.430805	0.681	0.166	7.40406e-22	2.08829e-78	0.601322	0.655	0.089	4.00408e-74	3.86151e-26	4.17657e-78
Cndp1	3.57423e-22	0.299868	0.67	0.176	6.85323e-18	6.36387e-78	0.561369	0.694	0.113	1.22021e-73	3.57423e-22	1.27277e-77
Chpt1	9.86866e-28	0.744987	1	0.689	1.89222e-23	1.37828e-77	1.05578	1	0.718	2.64271e-73	9.86866e-28	2.75656e-77
Adhfe1	1.96045e-18	0.327319	0.681	0.243	3.75897e-14	2.03446e-77	0.535577	0.752	0.151	3.90086e-73	1.96045e-18	4.06891e-77
Pdzk1ip1	4.91494e-33	1.13089	0.989	0.618	9.4239e-29	1.31836e-76	1.21466	0.99	0.592	2.52781e-72	4.91494e-33	2.63671e-76
Agxt2	1.5702e-21	0.336765	0.596	0.135	3.0107e-17	1.69571e-76	0.432949	0.665	0.097	3.25135e-72	1.5702e-21	3.39142e-76
Gpx4	3.92785e-24	0.583241	1	0.936	7.53126e-20	3.14701e-76	0.773067	1	0.968	6.03408e-72	3.92785e-24	6.29402e-76
Tmem82	3.06394e-16	0.266677	0.521	0.145	5.8748e-12	6.33835e-76	0.390301	0.607	0.069	1.21531e-71	3.06394e-16	1.26767e-75
Gpr137b	1.02508e-25	0.550886	0.766	0.257	1.96549e-21	2.51029e-75	0.572512	0.83	0.215	4.81322e-71	1.02508e-25	5.02057e-75
Csad	1.39327e-16	0.662432	0.915	0.595	2.67145e-12	4.8135e-75	1.13074	0.947	0.516	9.2294e-71	1.39327e-16	9.627e-75
Vil1	2.17819e-19	0.382682	0.798	0.318	4.17647e-15	7.11843e-75	0.5176	0.723	0.135	1.36489e-70	2.17819e-19	1.42369e-74
Paqr9	4.24826e-27	0.472043	0.713	0.176	8.14562e-23	1.24036e-74	0.30874	0.524	0.04	2.37827e-70	4.24826e-27	2.48073e-74
Slc27a2	1.0054e-32	0.71632	0.915	0.253	1.92775e-28	1.9339e-74	0.987998	0.947	0.29	3.70807e-70	1.0054e-32	3.86781e-74
Sult1d1	3.00351e-42	1.39182	0.989	0.294	5.75892e-38	3.46613e-74	1.08018	0.995	0.378	6.64595e-70	3.00351e-42	6.93225e-74
Tmbim4	1.03058e-21	0.610965	0.957	0.801	1.97604e-17	6.09801e-74	0.82495	0.985	0.838	1.16923e-69	1.03058e-21	1.2196e-73
Tmem45b	2.29565e-20	0.368321	0.585	0.135	4.40168e-16	1.13634e-73	0.561765	0.655	0.097	2.17881e-69	2.29565e-20	2.27267e-73
Glyctk	5.03184e-21	0.33185	0.67	0.189	9.64804e-17	3.73094e-73	0.457198	0.602	0.076	7.15371e-69	5.03184e-21	7.46188e-73
Ndrg1	2.70264e-34	1.20283	0.926	0.385	5.18204e-30	2.67211e-72	1.18115	0.937	0.372	5.1235e-68	2.70264e-34	5.34422e-72
Pkm	7.13969e-27	-1.3214	0.638	0.892	1.36896e-22	4.82663e-72	-1.24754	0.675	0.942	9.25458e-68	7.13969e-27	9.65326e-72
Sfxn1	6.52306e-30	0.780606	1	0.713	1.25073e-25	1.55397e-71	0.754844	0.995	0.829	2.97958e-67	6.52306e-30	3.10794e-71
Akr7a5	5.94965e-23	0.659832	0.989	0.784	1.14079e-18	6.73947e-71	0.817141	1	0.825	1.29223e-66	5.94965e-23	1.34789e-70
Gpx3	5.18632e-32	1.50577	0.926	0.389	9.94425e-28	1.6575e-70	1.37498	0.85	0.246	3.1781e-66	5.18632e-32	3.31501e-70
Cgref1	4.12123e-27	0.552178	0.819	0.284	7.90204e-23	2.50647e-70	0.760105	0.874	0.32	4.80591e-66	4.12123e-27	5.01295e-70
Slc22a13	4.55787e-12	0.503771	0.436	0.118	8.73925e-08	2.7948e-70	0.789525	0.544	0.054	5.35874e-66	4.55787e-12	5.58959e-70
Me1	2.68545e-19	0.31372	0.511	0.111	5.14908e-15	1.14594e-69	0.426442	0.573	0.065	2.19723e-65	2.68545e-19	2.29188e-69
Glyat	5.7189e-26	0.656874	0.851	0.304	1.09654e-21	7.17796e-69	0.678875	0.796	0.212	1.3763e-64	5.7189e-26	1.43559e-68
4931406C07Rik	2.21066e-40	1.29496	1	0.527	4.23872e-36	1.55308e-68	1.12053	0.99	0.632	2.97787e-64	2.21066e-40	3.10616e-68
Fth1	3.50997e-27	0.68194	1	0.97	6.73002e-23	2.64026e-68	0.9469	1	0.993	5.06244e-64	3.50997e-27	5.28053e-68
Mdh1	1.75907e-17	0.538421	0.989	0.966	3.37285e-13	3.5164e-68	0.885095	1	0.977	6.74234e-64	1.75907e-17	7.03279e-68
Fxyd2	2.35365e-25	0.807851	1	0.845	4.51288e-21	4.06475e-68	1.10237	1	0.831	7.79375e-64	2.35365e-25	8.1295e-68
Gm4450	3.81873e-30	0.622693	0.819	0.223	7.32204e-26	4.64494e-68	0.655331	0.874	0.286	8.90621e-64	3.81873e-30	9.28988e-68
Gss	4.55399e-27	0.647746	0.904	0.436	8.73181e-23	2.26513e-67	0.889366	0.956	0.54	4.34317e-63	4.55399e-27	4.53027e-67
Dnajc19	1.4435e-21	0.527057	0.979	0.747	2.76777e-17	2.46578e-67	0.883598	0.956	0.746	4.72788e-63	1.4435e-21	4.93155e-67
Tkt	9.6469e-17	0.456618	0.968	0.828	1.8497e-12	2.9125e-67	0.837823	0.976	0.788	5.58442e-63	9.6469e-17	5.825e-67
Alpl	5.60004e-21	0.330773	0.511	0.088	1.07375e-16	1.01571e-66	0.408064	0.519	0.052	1.94752e-62	5.60004e-21	2.03142e-66
Anpep	2.84771e-23	0.638552	0.947	0.497	5.46021e-19	1.02765e-66	0.996597	0.985	0.52	1.97042e-62	2.84771e-23	2.0553e-66
Nsdhl	1.18231e-17	0.455217	0.83	0.476	2.26696e-13	1.37804e-66	0.548696	0.816	0.272	2.64225e-62	1.18231e-17	2.75607e-66
Grhpr	3.67722e-25	0.649601	0.989	0.736	7.05071e-21	2.90007e-66	0.817043	0.981	0.852	5.56059e-62	3.67722e-25	5.80013e-66
Cbr1	2.12479e-34	1.0139	1	0.723	4.07408e-30	4.01672e-66	0.978753	0.99	0.882	7.70167e-62	2.12479e-34	8.03345e-66
Fabp3	6.40097e-13	0.366222	1	0.639	1.22732e-08	8.55292e-66	1.07697	0.995	0.509	1.63994e-61	6.40097e-13	1.71058e-65
Prodh2	4.26633e-44	0.987699	0.883	0.159	8.18026e-40	8.60581e-66	0.794602	0.752	0.185	1.65008e-61	4.26633e-44	1.72116e-65
Hpn	3.97105e-25	0.597081	0.936	0.537	7.6141e-21	9.55228e-66	0.765759	0.908	0.428	1.83155e-61	3.97105e-25	1.91046e-65
Hoga1	1.63133e-31	0.776151	0.926	0.436	3.12791e-27	1.21016e-65	0.802689	0.961	0.564	2.32037e-61	1.63133e-31	2.42033e-65
Nus1	1.54489e-27	0.654963	0.926	0.547	2.96217e-23	1.314e-65	0.842429	0.942	0.576	2.51947e-61	1.54489e-27	2.62801e-65
Ggt1	6.47378e-31	1.02839	0.989	0.72	1.24128e-26	1.99716e-65	0.948987	1	0.825	3.82936e-61	6.47378e-31	3.99433e-65
Pter	1.30613e-27	0.891734	0.936	0.419	2.50437e-23	3.53413e-65	0.941388	0.966	0.517	6.77635e-61	1.30613e-27	7.06827e-65
Serpinf2	1.1779e-35	0.832029	0.936	0.274	2.25851e-31	6.79721e-65	0.718334	0.888	0.323	1.3033e-60	1.1779e-35	1.35944e-64
Cubn	2.25557e-36	0.79267	0.936	0.26	4.32483e-32	1.89644e-64	0.72667	0.883	0.326	3.63623e-60	2.25557e-36	3.79288e-64
Napsa	3.41241e-34	1.20962	1	0.436	6.54296e-30	4.88509e-64	0.959362	0.99	0.458	9.36667e-60	3.41241e-34	9.77018e-64
Car12	1.17685e-29	0.787532	0.862	0.307	2.25649e-25	5.30799e-64	0.725549	0.748	0.206	1.01775e-59	1.17685e-29	1.0616e-63
Acadm	6.49654e-26	0.773647	0.989	0.75	1.24565e-21	1.03459e-63	0.87001	1	0.908	1.98372e-59	6.49654e-26	2.06918e-63
Cdkn1a	1.67901e-28	0.745052	0.968	0.419	3.21933e-24	3.26606e-63	0.868043	0.947	0.498	6.26235e-59	1.67901e-28	6.53212e-63
Acot4	1.07422e-34	0.649269	0.819	0.209	2.05972e-30	4.77047e-63	0.470367	0.694	0.154	9.1469e-59	1.07422e-34	9.54094e-63
Ihh	1.72442e-17	0.346764	0.553	0.132	3.3064e-13	5.41858e-63	0.39321	0.485	0.046	1.03896e-58	1.72442e-17	1.08372e-62
Gstz1	6.83552e-29	0.757981	0.904	0.503	1.31064e-24	9.75612e-63	0.737045	0.937	0.52	1.87064e-58	6.83552e-29	1.95122e-62
Tmem229a	2.15582e-28	0.67399	0.872	0.331	4.13357e-24	1.14766e-62	0.604585	0.883	0.339	2.20051e-58	2.15582e-28	2.29531e-62
Slc7a13	5.74621e-23	0.838244	0.713	0.196	1.10178e-18	1.35248e-62	0.756755	0.67	0.141	2.59324e-58	5.74621e-23	2.70495e-62
Rnf181	7.64443e-22	0.428505	0.872	0.439	1.46574e-17	1.81134e-62	0.613557	0.874	0.369	3.47307e-58	7.64443e-22	3.62269e-62
Hsp90ab1	1.00689e-21	-0.644178	0.989	0.983	1.93061e-17	5.32874e-62	-0.655135	1	0.992	1.02173e-57	1.00689e-21	1.06575e-61
Hmgcs1	2.39074e-21	0.674557	0.989	0.791	4.584e-17	5.56184e-62	0.938667	0.976	0.801	1.06643e-57	2.39074e-21	1.11237e-61
Timp3	1.42016e-15	0.471782	0.809	0.439	2.72301e-11	6.28337e-62	0.676243	0.869	0.324	1.20477e-57	1.42016e-15	1.25667e-61
Hao2	1.42932e-30	1.03385	0.947	0.399	2.74057e-26	8.84358e-62	1.12578	0.966	0.527	1.69567e-57	1.42932e-30	1.76872e-61
F10	6.3075e-19	0.328914	0.447	0.071	1.2094e-14	1.09833e-61	0.278812	0.413	0.027	2.10594e-57	6.3075e-19	2.19666e-61
Idh1	7.60766e-33	0.94571	1	0.662	1.45869e-28	2.36325e-61	0.824226	1	0.625	4.5313e-57	7.60766e-33	4.7265e-61
Slc7a12	1.91429e-08	0.321407	0.362	0.111	0.000367047	2.92868e-61	0.778416	0.558	0.076	5.61546e-57	1.91429e-08	5.85737e-61
Aldh6a1	1.91929e-31	0.731616	0.936	0.416	3.68005e-27	3.54085e-61	0.67357	0.956	0.543	6.78922e-57	1.91929e-31	7.08169e-61
Uqcr10	2.68248e-16	0.430389	1	0.929	5.14338e-12	4.53018e-61	0.631171	1	0.97	8.68616e-57	2.68248e-16	9.06036e-61
Cyba	4.36747e-34	0.978746	1	0.818	8.37418e-30	7.96991e-61	0.761731	1	0.95	1.52815e-56	4.36747e-34	1.59398e-60
Slc25a10	7.97778e-29	0.568363	0.904	0.412	1.52966e-24	9.39458e-61	0.679658	0.854	0.339	1.80132e-56	7.97778e-29	1.87892e-60
Kap	4.3733e-12	1.63545	0.277	0.041	8.38537e-08	1.00622e-60	1.97585	0.631	0.128	1.92933e-56	4.3733e-12	2.01244e-60
Fads3	1.25023e-32	0.758069	0.894	0.291	2.39719e-28	1.44462e-60	0.751434	0.893	0.358	2.76991e-56	1.25023e-32	2.88924e-60
Lamtor5	1.76546e-26	0.671178	0.979	0.736	3.3851e-22	1.55446e-60	0.755411	0.971	0.83	2.98052e-56	1.76546e-26	3.10892e-60
Fbp2	4.47815e-33	0.743679	0.883	0.22	8.58641e-29	1.57096e-60	0.532207	0.689	0.147	3.01216e-56	4.47815e-33	3.14192e-60
Lactb2	8.31428e-27	0.66279	0.904	0.463	1.59418e-22	1.77321e-60	0.698589	0.971	0.564	3.39995e-56	8.31428e-27	3.54641e-60
Car4	1.92088e-16	0.525075	0.894	0.507	3.6831e-12	2.74876e-60	0.681079	0.942	0.42	5.27047e-56	1.92088e-16	5.49752e-60
Txndc17	3.8873e-26	0.665057	0.989	0.824	7.45351e-22	3.37679e-60	0.682525	0.99	0.924	6.47465e-56	3.8873e-26	6.75357e-60
Bphl	4.33132e-20	0.551647	0.936	0.655	8.30486e-16	5.11517e-60	0.672964	0.971	0.748	9.80783e-56	4.33132e-20	1.02303e-59
Slc7a9	1.28253e-21	0.406609	0.723	0.223	2.45912e-17	6.53029e-60	0.389112	0.631	0.114	1.25212e-55	1.28253e-21	1.30606e-59
Amn	6.08447e-34	0.98291	1	0.419	1.16664e-29	7.65293e-60	0.812739	0.985	0.48	1.46737e-55	6.08447e-34	1.53059e-59
Ndufb8	1.48797e-11	0.335966	1	0.922	2.85304e-07	1.07485e-59	0.704469	1	0.969	2.06092e-55	1.48797e-11	2.1497e-59
Gas2	7.10072e-32	0.854812	0.957	0.436	1.36149e-27	1.54866e-59	0.686788	0.961	0.415	2.96941e-55	7.10072e-32	3.09733e-59
H3f3a	1.11738e-17	-0.787919	0.989	0.936	2.14246e-13	3.56112e-59	-0.681332	0.985	0.983	6.8281e-55	1.11738e-17	7.12225e-59
Defb29	9.91915e-10	0.275192	0.426	0.152	1.9019e-05	7.61164e-59	0.570982	0.597	0.108	1.45945e-54	9.91915e-10	1.52233e-58
Cth	7.90865e-20	0.50871	0.894	0.503	1.5164e-15	8.05129e-59	0.752823	0.976	0.502	1.54376e-54	7.90865e-20	1.61026e-58
Asb9	6.31276e-13	0.329638	0.766	0.345	1.21041e-08	1.05453e-58	0.482867	0.733	0.188	2.02196e-54	6.31276e-13	2.10906e-58
Hykk	9.55495e-35	0.670334	0.894	0.274	1.83207e-30	1.56701e-58	0.554978	0.82	0.276	3.00459e-54	9.55495e-35	3.13403e-58
Cyb5a	6.22516e-21	0.643149	1	0.814	1.19361e-16	2.73866e-58	0.719275	1	0.923	5.25111e-54	6.22516e-21	5.47732e-58
Cldn10	6.39839e-24	0.448996	0.947	0.402	1.22683e-19	4.46073e-58	0.323961	0.888	0.303	8.55299e-54	6.39839e-24	8.92145e-58
Slc18a1	1.51617e-27	0.452676	0.574	0.081	2.90711e-23	1.12544e-57	0.335634	0.437	0.042	2.15792e-53	1.51617e-27	2.25088e-57
Lap3	3.20692e-24	0.603715	0.989	0.72	6.14894e-20	1.39903e-57	0.767087	0.976	0.778	2.6825e-53	3.20692e-24	2.79806e-57
Acmsd	3.38003e-31	0.557676	0.564	0.041	6.48087e-27	1.4069e-57	0.541339	0.393	0.024	2.69759e-53	3.38003e-31	2.8138e-57
Bhmt2	3.1927e-14	0.405909	0.457	0.125	6.12167e-10	2.79332e-57	0.595277	0.714	0.178	5.3559e-53	3.1927e-14	5.58663e-57
Aldh4a1	1.58142e-23	0.605342	0.862	0.416	3.03222e-19	2.88047e-57	0.610089	0.859	0.373	5.52301e-53	1.58142e-23	5.76093e-57
Ace2	1.09408e-18	0.421958	0.798	0.307	2.09779e-14	8.51588e-57	0.53086	0.854	0.291	1.63283e-52	1.09408e-18	1.70318e-56
Folr1	4.46023e-23	0.726079	0.989	0.527	8.55205e-19	9.13772e-57	0.808268	0.956	0.459	1.75207e-52	4.46023e-23	1.82754e-56
Hdc	2.7846e-27	0.949112	0.968	0.382	5.3392e-23	9.4138e-57	0.959018	0.84	0.269	1.805e-52	2.7846e-27	1.88276e-56
Smim1	1.40872e-18	0.434326	0.851	0.507	2.70107e-14	1.08936e-56	0.686719	0.951	0.601	2.08875e-52	1.40872e-18	2.17873e-56
Habp2	6.75903e-14	0.358332	0.691	0.304	1.29598e-09	5.27533e-56	0.349731	0.549	0.088	1.01149e-51	6.75903e-14	1.05507e-55
Keg1	2.95826e-29	0.833829	0.968	0.385	5.67218e-25	1.08783e-55	0.81532	0.961	0.454	2.08581e-51	2.95826e-29	2.17566e-55
Ugt2b37	1.79182e-22	0.662868	0.755	0.233	3.43563e-18	1.16725e-55	0.677201	0.485	0.061	2.23808e-51	1.79182e-22	2.33449e-55
Slc37a4	7.70733e-26	0.664425	0.872	0.429	1.4778e-21	1.21021e-55	0.575995	0.898	0.459	2.32046e-51	7.70733e-26	2.42042e-55
Tmem27	5.99004e-34	1.15477	1	0.493	1.14853e-29	1.3741e-55	0.810433	1	0.568	2.6347e-51	5.99004e-34	2.7482e-55
Cndp2	6.94496e-29	0.94983	0.979	0.666	1.33163e-24	1.93191e-55	0.884626	0.966	0.63	3.70425e-51	6.94496e-29	3.86382e-55
0610005C13Rik	4.80285e-26	0.648133	0.979	0.416	9.20899e-22	2.47939e-55	0.62555	0.947	0.421	4.75399e-51	4.80285e-26	4.95879e-55
Acy3	1.08011e-29	1.10295	0.862	0.361	2.071e-25	4.50556e-55	0.841749	0.903	0.398	8.63896e-51	1.08011e-29	9.01112e-55
Atp6v1g1	2.16497e-23	0.620275	0.989	0.875	4.15112e-19	4.52305e-55	0.620761	0.99	0.962	8.67249e-51	2.16497e-23	9.04609e-55
Sord	2.66423e-38	0.852125	0.957	0.361	5.1084e-34	8.58426e-55	0.628508	0.811	0.32	1.64595e-50	2.66423e-38	1.71685e-54
Atp5g1	7.06007e-14	0.361017	1	0.97	1.3537e-09	8.82073e-55	0.636215	0.995	0.986	1.69129e-50	7.06007e-14	1.76415e-54
Uqcrq	3.72071e-15	0.358118	1	0.909	7.13409e-11	1.32017e-54	0.650549	1	0.934	2.53129e-50	3.72071e-15	2.64034e-54
Pgam1	4.45389e-14	0.39694	0.989	0.939	8.53988e-10	1.73365e-54	0.526445	0.995	0.985	3.3241e-50	4.45389e-14	3.4673e-54
Rpl21	2.97956e-20	-0.590978	0.979	0.973	5.713e-16	4.33184e-54	-0.563645	1	0.986	8.30587e-50	2.97956e-20	8.66368e-54
Nat8	1.34577e-32	0.724251	0.628	0.071	2.58038e-28	8.43563e-54	0.502972	0.379	0.028	1.61745e-49	1.34577e-32	1.68713e-53
Slc23a1	3.81587e-27	0.686775	0.851	0.297	7.31655e-23	9.02427e-54	0.669928	0.927	0.384	1.73031e-49	3.81587e-27	1.80485e-53
Lamp2	5.29226e-28	0.663928	0.989	0.75	1.01474e-23	1.02554e-53	0.661835	0.985	0.835	1.96636e-49	5.29226e-28	2.05107e-53
Ftl1	9.82688e-30	0.850386	1	0.997	1.88421e-25	2.32864e-53	0.690009	1	1	4.46493e-49	9.82688e-30	4.65728e-53
Acot3	1.9101e-29	0.415387	0.553	0.057	3.66242e-25	2.49795e-53	0.413632	0.51	0.077	4.78957e-49	1.9101e-29	4.9959e-53
Smim24	6.50741e-22	0.565599	0.872	0.334	1.24773e-17	2.69336e-53	0.551653	0.854	0.332	5.16425e-49	6.50741e-22	5.38672e-53
Hspe1	4.01583e-14	0.368614	1	0.946	7.69994e-10	3.37206e-53	0.5581	1	0.975	6.46559e-49	4.01583e-14	6.74412e-53
Slc16a4	2.59799e-28	0.400496	0.574	0.078	4.98139e-24	4.03546e-53	0.420436	0.684	0.178	7.73759e-49	2.59799e-28	8.07092e-53
BC025446	2.73463e-21	0.404819	0.713	0.226	5.24339e-17	5.8769e-53	0.345309	0.617	0.136	1.12684e-48	2.73463e-21	1.17538e-52
Guca2b	7.94508e-25	0.399571	0.553	0.081	1.52339e-20	6.95409e-53	0.483128	0.476	0.064	1.33338e-48	7.94508e-25	1.39082e-52
Sat1	4.23903e-17	0.43056	0.894	0.557	8.12792e-13	7.00279e-53	0.644512	0.951	0.6	1.34271e-48	4.23903e-17	1.40056e-52
Oxct1	1.78884e-10	0.375572	1	0.865	3.42992e-06	9.08933e-53	0.734475	1	0.837	1.74279e-48	1.78884e-10	1.81787e-52
Fut9	1.31096e-35	1.12282	0.968	0.378	2.51363e-31	1.36488e-52	0.764675	0.951	0.511	2.61702e-48	1.31096e-35	2.72976e-52
Fuom	3.11108e-20	0.521909	0.872	0.456	5.96519e-16	2.22764e-52	0.641621	0.85	0.397	4.27128e-48	3.11108e-20	4.45529e-52
Slc13a1	2.0108e-26	0.424577	0.617	0.101	3.85551e-22	3.30353e-52	0.26704	0.383	0.031	6.33418e-48	2.0108e-26	6.60705e-52
Gapdh	3.53107e-12	0.332132	1	0.973	6.77048e-08	3.36565e-52	0.580955	1	0.994	6.45329e-48	3.53107e-12	6.73129e-52
Pim3	9.3725e-14	0.401769	0.883	0.608	1.79708e-09	4.0708e-52	0.677835	0.932	0.579	7.80536e-48	9.3725e-14	8.14161e-52
Slc6a18	2.21947e-39	0.929478	0.894	0.223	4.25561e-35	7.87558e-52	0.611693	0.927	0.364	1.51006e-47	2.21947e-39	1.57512e-51
Gjb1	5.43476e-32	0.611413	0.809	0.24	1.04206e-27	1.4258e-51	0.430327	0.592	0.131	2.73383e-47	5.43476e-32	2.8516e-51
Tinag	1.99541e-30	0.665528	0.915	0.318	3.826e-26	1.86208e-51	0.531234	0.908	0.424	3.57034e-47	1.99541e-30	3.72415e-51
Amacr	2.6115e-21	0.476811	0.883	0.446	5.00729e-17	1.88617e-51	0.603939	0.903	0.465	3.61655e-47	2.6115e-21	3.77234e-51
Mcur1	4.5352e-14	0.428758	0.819	0.53	8.69579e-10	2.57966e-51	0.554494	0.903	0.484	4.94625e-47	4.5352e-14	5.15933e-51
Lrpap1	6.44148e-18	0.65672	0.968	0.78	1.23509e-13	2.73115e-51	0.721122	1	0.842	5.23671e-47	6.44148e-18	5.4623e-51
Ly6a	2.06907e-07	0.334412	1	0.74	0.00396724	3.47952e-51	0.884556	0.99	0.514	6.67163e-47	2.06907e-07	6.95903e-51
Ddah2	4.46625e-13	-0.780152	0.511	0.736	8.56359e-09	7.04036e-51	-0.894321	0.451	0.853	1.34992e-46	4.46625e-13	1.40807e-50
Macrod2	1.37607e-23	0.514574	0.83	0.405	2.63847e-19	8.3598e-51	0.594763	0.748	0.294	1.60291e-46	1.37607e-23	1.67196e-50
Aadac	1.14082e-27	0.558867	0.787	0.216	2.18741e-23	8.40385e-51	0.380168	0.665	0.16	1.61135e-46	1.14082e-27	1.68077e-50
Pth1r	1.41602e-24	0.570495	1	0.713	2.71508e-20	8.96763e-51	0.674871	0.995	0.755	1.71945e-46	1.41602e-24	1.79353e-50
Rpl7	4.0862e-15	-0.519101	1	0.966	7.83487e-11	1.23613e-50	-0.552878	1	0.992	2.37016e-46	4.0862e-15	2.47227e-50
Fdx1	4.72818e-12	0.281872	0.915	0.726	9.06582e-08	1.30684e-50	0.619031	0.971	0.761	2.50573e-46	4.72818e-12	2.61367e-50
AI314278	3.56573e-22	0.442352	0.681	0.196	6.83694e-18	1.521e-50	0.574015	0.689	0.197	2.91636e-46	3.56573e-22	3.042e-50
Rpl9	1.3604e-18	-0.595865	1	0.966	2.60842e-14	1.61463e-50	-0.579225	0.99	0.986	3.09589e-46	1.3604e-18	3.22926e-50
Ak4	5.4772e-21	0.477437	0.66	0.206	1.0502e-16	2.49643e-50	0.41237	0.757	0.25	4.78666e-46	5.4772e-21	4.99287e-50
4833439L19Rik	3.37573e-26	0.600655	0.968	0.608	6.47262e-22	2.70531e-50	0.557904	0.917	0.571	5.18715e-46	3.37573e-26	5.41061e-50
Ace	4.1953e-19	0.551061	0.691	0.233	8.04406e-15	2.73182e-50	0.644372	0.811	0.329	5.23799e-46	4.1953e-19	5.46364e-50
Slc22a12	1.34619e-17	0.490996	0.628	0.189	2.58119e-13	3.06749e-50	0.405321	0.587	0.123	5.88161e-46	1.34619e-17	6.13498e-50
Uqcr11	9.91891e-16	0.355053	1	0.946	1.90185e-11	5.20529e-50	0.489745	1	0.977	9.98062e-46	9.91891e-16	1.04106e-49
Sqle	4.1285e-10	0.302515	0.777	0.486	7.91598e-06	7.19019e-50	0.558327	0.786	0.317	1.37865e-45	4.1285e-10	1.43804e-49
Snx7	2.34641e-13	0.258915	0.84	0.443	4.49901e-09	8.12055e-50	0.463147	0.874	0.414	1.55704e-45	2.34641e-13	1.62411e-49
Marcksl1	4.77518e-19	-0.917498	0.372	0.76	9.15594e-15	8.95803e-50	-0.783673	0.35	0.813	1.71761e-45	4.77518e-19	1.79161e-49
Slc5a1	7.9606e-13	0.505212	0.489	0.159	1.52637e-08	9.79225e-50	0.555326	0.723	0.228	1.87757e-45	7.9606e-13	1.95845e-49
Upb1	6.56816e-17	0.250234	0.362	0.047	1.25938e-12	1.12974e-49	0.258334	0.35	0.025	2.16617e-45	6.56816e-17	2.25948e-49
Ndufb4	1.55582e-15	0.424723	0.947	0.845	2.98312e-11	1.91165e-49	0.558514	0.995	0.942	3.6654e-45	1.55582e-15	3.82331e-49
Scp2	4.56578e-30	0.758513	1	0.794	8.75442e-26	2.28545e-49	0.573003	0.99	0.896	4.38212e-45	4.56578e-30	4.5709e-49
Rps20	1.27867e-15	-0.670703	1	0.973	2.45172e-11	6.69344e-49	-0.619879	1	0.99	1.2834e-44	1.27867e-15	1.33869e-48
Pdxk	4.80865e-19	0.304722	0.819	0.368	9.2201e-15	6.97625e-49	0.521246	0.762	0.306	1.33763e-44	4.80865e-19	1.39525e-48
Xylb	7.8727e-24	0.483992	0.809	0.301	1.50951e-19	1.02135e-48	0.453007	0.65	0.192	1.95834e-44	7.8727e-24	2.04271e-48
Slc6a13	9.88957e-15	0.372511	0.787	0.351	1.89623e-10	1.79627e-48	0.551428	0.883	0.36	3.44417e-44	9.88957e-15	3.59254e-48
Cox5a	1.26815e-10	0.303439	1	0.943	2.43154e-06	1.93673e-48	0.665459	0.99	0.978	3.71348e-44	1.26815e-10	3.87345e-48
Gm19950	5.32668e-15	0.38101	0.798	0.304	1.02134e-10	2.00729e-48	0.575246	0.82	0.271	3.84879e-44	5.32668e-15	4.01459e-48
Apom	1.62417e-20	0.696594	0.691	0.203	3.11419e-16	2.30043e-48	0.681428	0.636	0.168	4.41084e-44	1.62417e-20	4.60086e-48
Hnf4a	3.64451e-33	0.741643	0.926	0.351	6.98798e-29	2.89424e-48	0.562673	0.908	0.402	5.54942e-44	3.64451e-33	5.78849e-48
Gpx1	3.18109e-22	0.536159	1	0.804	6.09941e-18	5.86258e-48	0.587217	0.99	0.918	1.12409e-43	3.18109e-22	1.17252e-47
Eef1a1	2.1751e-13	-0.476976	1	0.997	4.17054e-09	6.39408e-48	-0.50478	1	1	1.226e-43	2.1751e-13	1.27882e-47
Rps27	2.70315e-19	-0.553138	1	0.976	5.18302e-15	9.38873e-48	-0.571166	1	0.99	1.80019e-43	2.70315e-19	1.87775e-47
Mrpl12	4.01142e-12	0.361422	0.957	0.841	7.69149e-08	9.78379e-48	0.572135	0.971	0.879	1.87594e-43	4.01142e-12	1.95676e-47
Abcg2	4.86141e-34	0.904201	0.979	0.524	9.32126e-30	1.0278e-47	0.629784	0.985	0.579	1.9707e-43	4.86141e-34	2.05559e-47
Ndufc1	7.08697e-11	0.314481	1	0.899	1.35886e-06	1.20091e-47	0.541071	0.995	0.949	2.30263e-43	7.08697e-11	2.40182e-47
Slc26a1	5.08017e-43	0.773863	0.851	0.159	9.74072e-39	1.42105e-47	0.324017	0.505	0.089	2.72473e-43	5.08017e-43	2.84211e-47
Gk	3.29958e-26	0.711625	0.915	0.416	6.32661e-22	1.53636e-47	0.569962	0.971	0.592	2.94582e-43	3.29958e-26	3.07272e-47
Rps9	4.78831e-11	-0.450961	1	0.949	9.18111e-07	1.90236e-47	-0.521987	1	0.987	3.64759e-43	4.78831e-11	3.80473e-47
Dpep1	9.67006e-29	0.711217	0.574	0.064	1.85414e-24	4.02842e-47	0.370425	0.369	0.034	7.7241e-43	9.67006e-29	8.05685e-47
Usmg5	8.6478e-15	0.321071	1	0.892	1.65813e-10	5.83228e-47	0.532546	0.995	0.945	1.11828e-42	8.6478e-15	1.16646e-46
Ndufa6	1.50001e-09	0.292572	1	0.919	2.87612e-05	6.52938e-47	0.486246	0.995	0.96	1.25194e-42	1.50001e-09	1.30588e-46
Cyc1	1.89453e-10	0.277239	0.989	0.916	3.63258e-06	1.07097e-46	0.580408	0.99	0.924	2.05347e-42	1.89453e-10	2.14193e-46
Rps29	2.51487e-16	-0.413016	1	0.993	4.82201e-12	1.83255e-46	-0.454091	1	0.999	3.51374e-42	2.51487e-16	3.66511e-46
Fuca2	1.31356e-20	0.590705	0.915	0.514	2.51861e-16	1.88026e-46	0.595673	0.908	0.499	3.60521e-42	1.31356e-20	3.76052e-46
Pcbd1	8.42891e-13	0.358239	0.979	0.811	1.61616e-08	2.84252e-46	0.53434	1	0.911	5.45025e-42	8.42891e-13	5.68505e-46
Atp5o.1	4.01737e-12	0.290326	1	0.949	7.70291e-08	2.91997e-46	0.510268	1	0.98	5.59875e-42	4.01737e-12	5.83994e-46
Aco1	1.09004e-22	0.439262	0.904	0.507	2.09004e-18	3.02077e-46	0.489167	0.908	0.525	5.79202e-42	1.09004e-22	6.04153e-46
Ndufv3	1.24673e-20	0.541006	0.979	0.811	2.39048e-16	3.32799e-46	0.540787	0.985	0.906	6.38109e-42	1.24673e-20	6.65598e-46
Chdh	3.63612e-18	0.2573	0.553	0.139	6.9719e-14	6.94784e-46	0.329264	0.549	0.124	1.33218e-41	3.63612e-18	1.38957e-45
Ndufb6	2.0129e-10	0.297435	0.968	0.828	3.85953e-06	8.61845e-46	0.534629	0.985	0.898	1.6525e-41	2.0129e-10	1.72369e-45
Rps5	1.39932e-13	-0.597528	1	0.98	2.68305e-09	9.4033e-46	-0.612741	1	0.99	1.80299e-41	1.39932e-13	1.88066e-45
Mrps36	3.33796e-15	0.353597	0.968	0.736	6.4002e-11	1.00638e-45	0.579947	0.951	0.766	1.92964e-41	3.33796e-15	2.01277e-45
Gkap1	1.41473e-10	0.291707	0.915	0.709	2.71261e-06	1.38369e-45	0.630326	0.937	0.682	2.65309e-41	1.41473e-10	2.76738e-45
Chchd10	9.0044e-12	0.31191	0.989	0.909	1.7265e-07	1.45117e-45	0.63983	1	0.92	2.78247e-41	9.0044e-12	2.90234e-45
Cela1	3.4974e-34	1.08132	0.915	0.365	6.70592e-30	1.73686e-45	0.731966	0.757	0.295	3.33026e-41	3.4974e-34	3.47373e-45
Pah	5.15174e-32	0.622226	0.532	0.03	9.87794e-28	1.87829e-45	0.348236	0.32	0.021	3.60144e-41	5.15174e-32	3.75659e-45
Hnrnpa1	1.58315e-20	-1.10455	0.84	0.865	3.03553e-16	1.99087e-45	-0.821437	0.811	0.927	3.81729e-41	1.58315e-20	3.98174e-45
Nme1	1.02587e-08	0.296766	1	0.851	0.000196701	2.78706e-45	0.554022	0.995	0.911	5.3439e-41	1.02587e-08	5.57411e-45
Miox	1.84745e-37	0.935167	0.723	0.074	3.54229e-33	2.97189e-45	0.496119	0.335	0.025	5.69829e-41	1.84745e-37	5.94377e-45
Aprt	1.00992e-12	0.411417	0.989	0.814	1.93642e-08	5.18337e-45	0.557931	0.985	0.921	9.93858e-41	1.00992e-12	1.03667e-44
Gcnt1	3.08466e-28	0.571333	0.926	0.345	5.91453e-24	5.19017e-45	0.549248	0.83	0.324	9.95164e-41	3.08466e-28	1.03803e-44
Ctsh	2.48817e-24	0.54548	0.957	0.432	4.77083e-20	5.31163e-45	0.619158	0.942	0.582	1.01845e-40	2.48817e-24	1.06233e-44
Ugp2	1.50682e-16	0.417486	0.904	0.581	2.88917e-12	6.2376e-45	0.520487	0.917	0.617	1.196e-40	1.50682e-16	1.24752e-44
Map7	4.29978e-19	0.469996	0.883	0.497	8.24439e-15	7.37653e-45	0.539793	0.85	0.423	1.41438e-40	4.29978e-19	1.47531e-44
Rps4x	7.96054e-14	-0.542213	0.989	0.98	1.52635e-09	1.06397e-44	-0.5626	0.995	0.99	2.04007e-40	7.96054e-14	2.12795e-44
Hebp1	6.43209e-20	0.549801	0.936	0.588	1.23329e-15	1.41333e-44	0.584833	0.917	0.647	2.70992e-40	6.43209e-20	2.82666e-44
Smim22	3.39238e-16	0.303788	0.596	0.196	6.50455e-12	1.6304e-44	0.349543	0.485	0.095	3.12613e-40	3.39238e-16	3.2608e-44
Atp6v0a4	1.96854e-25	0.436826	0.872	0.324	3.77448e-21	1.67329e-44	0.421312	0.811	0.318	3.20836e-40	1.96854e-25	3.34658e-44
Dhcr24	4.01398e-12	0.339086	0.787	0.514	7.6964e-08	3.55033e-44	0.405328	0.65	0.208	6.80739e-40	4.01398e-12	7.10065e-44
H2afv	1.09305e-13	-0.948992	0.681	0.784	2.09581e-09	4.68033e-44	-0.764891	0.626	0.888	8.97407e-40	1.09305e-13	9.36067e-44
Rps3a1	1.72074e-17	-0.551647	1	0.976	3.29935e-13	5.96518e-44	-0.493979	1	0.991	1.14376e-39	1.72074e-17	1.19304e-43
Gm16010	1.21802e-43	0.743149	0.83	0.132	2.33543e-39	6.48148e-44	0.483622	0.607	0.164	1.24276e-39	1.21802e-43	1.2963e-43
Slc19a1	7.23311e-23	0.491471	0.83	0.392	1.38688e-18	8.32632e-44	0.460684	0.835	0.447	1.59649e-39	7.23311e-23	1.66526e-43
Entpd5	3.60954e-23	0.615919	0.862	0.405	6.92093e-19	8.4244e-44	0.645863	0.937	0.594	1.61529e-39	3.60954e-23	1.68488e-43
Rps14	5.87388e-14	-0.407576	1	0.986	1.12626e-09	1.00288e-43	-0.459983	1	0.998	1.92292e-39	5.87388e-14	2.00576e-43
Mfsd4b1	2.86558e-39	0.693953	0.809	0.162	5.49446e-35	1.23205e-43	0.440124	0.617	0.175	2.36232e-39	2.86558e-39	2.46409e-43
Selenbp1	1.7252e-18	0.50019	0.947	0.551	3.30791e-14	1.59198e-43	0.64318	0.937	0.625	3.05247e-39	1.7252e-18	3.18397e-43
Cox7a1	7.02683e-14	0.3171	0.628	0.26	1.34732e-09	1.69419e-43	0.354002	0.539	0.12	3.24843e-39	7.02683e-14	3.38837e-43
Mcrip2	2.00996e-11	0.269244	0.894	0.611	3.8539e-07	2.03317e-43	0.542859	0.903	0.536	3.8984e-39	2.00996e-11	4.06634e-43
Plscr2	8.44368e-27	0.660238	0.979	0.53	1.61899e-22	4.0958e-43	0.544968	0.981	0.688	7.85329e-39	8.44368e-27	8.19161e-43
Rplp0	1.15697e-13	-0.520611	1	0.973	2.21837e-09	4.8417e-43	-0.575835	0.995	0.992	9.28348e-39	1.15697e-13	9.6834e-43
Etfb	1.82064e-15	0.412082	1	0.824	3.49089e-11	5.69631e-43	0.529502	0.995	0.933	1.09221e-38	1.82064e-15	1.13926e-42
Afp	3.09696e-20	0.702311	0.957	0.514	5.93811e-16	6.23472e-43	0.619454	0.786	0.335	1.19545e-38	3.09696e-20	1.24694e-42
Rpsa	8.15096e-17	-0.575909	1	0.976	1.56286e-12	6.47591e-43	-0.584245	0.995	0.99	1.24169e-38	8.15096e-17	1.29518e-42
Slc5a8	8.84469e-17	0.61659	0.585	0.159	1.69588e-12	1.44979e-42	0.560398	0.738	0.243	2.77983e-38	8.84469e-17	2.89958e-42
Hnrnpa0	7.53336e-11	-0.561505	0.894	0.841	1.44445e-06	2.0377e-42	-0.590381	0.864	0.938	3.90708e-38	7.53336e-11	4.0754e-42
Rpl30	1.42956e-15	-0.551028	1	0.936	2.74104e-11	2.55827e-42	-0.503614	0.995	0.988	4.90524e-38	1.42956e-15	5.11655e-42
Zfyve21	5.90637e-12	0.316973	0.851	0.618	1.13249e-07	2.73679e-42	0.521891	0.898	0.638	5.24752e-38	5.90637e-12	5.47358e-42
Rps7	1.8978e-16	-0.621208	1	0.953	3.63885e-12	3.07964e-42	-0.547131	0.995	0.993	5.9049e-38	1.8978e-16	6.15928e-42
Rpl19	3.25931e-15	-0.416383	1	0.983	6.2494e-11	5.25626e-42	-0.41995	1	0.994	1.00783e-37	3.25931e-15	1.05125e-41
Papss2	7.1907e-17	0.33681	0.649	0.247	1.37874e-12	8.17413e-42	0.412239	0.68	0.222	1.56731e-37	7.1907e-17	1.63483e-41
Atp5g3	8.05151e-16	0.379401	1	0.929	1.5438e-11	1.4028e-41	0.469768	0.995	0.971	2.68974e-37	8.05151e-16	2.80561e-41
Cks2	3.59275e-10	0.345277	0.926	0.666	6.88875e-06	2.77198e-41	0.635395	0.908	0.652	5.31499e-37	3.59275e-10	5.54396e-41
Uqcrb	1.36941e-10	0.283232	1	0.922	2.6257e-06	4.71947e-41	0.448855	0.995	0.973	9.04912e-37	1.36941e-10	9.43894e-41
Rbbp7	4.58541e-08	0.291864	0.936	0.797	0.000879206	6.37654e-41	0.567777	0.971	0.838	1.22264e-36	4.58541e-08	1.27531e-40
Suclg1	7.22767e-13	0.286183	1	0.858	1.38583e-08	8.11123e-41	0.510201	0.981	0.942	1.55525e-36	7.22767e-13	1.62225e-40
Clrn3	1.94906e-24	0.401423	0.809	0.267	3.73713e-20	8.46533e-41	0.340106	0.728	0.243	1.62314e-36	1.94906e-24	1.69307e-40
Rpl18a	2.96209e-12	-0.534842	0.989	0.966	5.67951e-08	8.51525e-41	-0.561411	1	0.995	1.63271e-36	2.96209e-12	1.70305e-40
Cryzl2	3.85096e-15	0.40005	0.777	0.422	7.38383e-11	1.0205e-40	0.534615	0.937	0.575	1.9567e-36	3.85096e-15	2.04099e-40
Hmgb1	6.43016e-17	-0.956905	0.915	0.878	1.23292e-12	1.25685e-40	-0.700674	0.947	0.954	2.40988e-36	6.43016e-17	2.51369e-40
Iah1	1.6225e-23	0.643559	0.968	0.676	3.11098e-19	1.45332e-40	0.577895	0.956	0.808	2.78659e-36	1.6225e-23	2.90664e-40
Larp1b	2.99057e-13	0.391726	0.915	0.605	5.73411e-09	2.10519e-40	0.53619	0.908	0.66	4.03649e-36	2.99057e-13	4.21037e-40
Stard4	4.1252e-14	0.345018	0.798	0.449	7.90966e-10	2.13855e-40	0.402644	0.694	0.265	4.10046e-36	4.1252e-14	4.2771e-40
Acy1	1.33843e-19	0.367432	0.777	0.314	2.56631e-15	2.21384e-40	0.403895	0.801	0.364	4.24481e-36	1.33843e-19	4.42767e-40
Fhl1	1.58789e-14	0.357255	0.798	0.439	3.04461e-10	2.39077e-40	0.440261	0.816	0.363	4.58406e-36	1.58789e-14	4.78153e-40
Tmigd1	4.41676e-15	0.332347	0.5	0.128	8.4687e-11	2.61252e-40	0.48713	0.583	0.154	5.00924e-36	4.41676e-15	5.22503e-40
Glb1	2.17179e-16	0.334765	0.894	0.598	4.16419e-12	3.29266e-40	0.504638	0.903	0.597	6.31335e-36	2.17179e-16	6.58533e-40
Tmem147	1.17056e-12	0.275619	0.968	0.784	2.24444e-08	3.34038e-40	0.531019	0.961	0.816	6.40484e-36	1.17056e-12	6.68076e-40
Rpl22	1.52544e-09	-0.425181	0.989	0.895	2.92488e-05	3.56246e-40	-0.520164	0.995	0.976	6.83067e-36	1.52544e-09	7.12493e-40
Dlst	7.74233e-13	0.252703	0.936	0.676	1.48451e-08	3.74937e-40	0.457818	0.927	0.624	7.18903e-36	7.74233e-13	7.49873e-40
Atpif1	3.88359e-25	0.488366	1	0.963	7.44639e-21	5.08855e-40	0.433882	1	0.993	9.75679e-36	3.88359e-25	1.01771e-39
Rps11	7.8139e-13	-0.475961	1	0.959	1.49824e-08	5.68051e-40	-0.455914	1	0.988	1.08918e-35	7.8139e-13	1.1361e-39
Dab2	1.90133e-31	0.898711	0.979	0.466	3.64562e-27	5.76105e-40	0.59376	0.942	0.586	1.10462e-35	1.90133e-31	1.15221e-39
Dgat2	2.13593e-19	0.346092	0.766	0.331	4.09542e-15	5.79262e-40	0.383729	0.704	0.267	1.11068e-35	2.13593e-19	1.15852e-39
Rpl23a	6.59153e-12	-0.356079	1	0.946	1.26386e-07	6.40464e-40	-0.44217	0.995	0.987	1.22802e-35	6.59153e-12	1.28093e-39
Cideb	1.87864e-27	0.617827	0.84	0.294	3.60211e-23	8.03441e-40	0.491633	0.835	0.394	1.54052e-35	1.87864e-27	1.60688e-39
Slc2a2	2.93348e-29	0.66254	0.883	0.304	5.62465e-25	8.62699e-40	0.512873	0.777	0.328	1.65414e-35	2.93348e-29	1.7254e-39
Sox4	1.40039e-11	-0.788709	0.426	0.696	2.68511e-07	9.78856e-40	-1.14636	0.33	0.761	1.87686e-35	1.40039e-11	1.95771e-39
Gstm5	3.9571e-18	0.554084	0.957	0.699	7.58735e-14	2.23052e-39	0.559999	0.985	0.865	4.2768e-35	3.9571e-18	4.46104e-39
Cd24a	1.15364e-13	-0.776743	0.649	0.787	2.21199e-09	2.43764e-39	-0.852595	0.524	0.858	4.67393e-35	1.15364e-13	4.87528e-39
Rpl5	2.04632e-08	-0.287999	1	0.943	0.000392362	2.63455e-39	-0.41829	0.995	0.988	5.05149e-35	2.04632e-08	5.26911e-39
Bola3	2.76173e-13	0.350373	0.915	0.682	5.29534e-09	3.47517e-39	0.487486	0.893	0.638	6.6633e-35	2.76173e-13	6.95035e-39
P4hb	2.20471e-14	0.375416	0.979	0.784	4.22732e-10	3.98822e-39	0.49154	0.971	0.823	7.64702e-35	2.20471e-14	7.97645e-39
Trp53bp2	8.55821e-17	0.454791	0.809	0.449	1.64095e-12	5.40037e-39	0.587882	0.883	0.591	1.03547e-34	8.55821e-17	1.08007e-38
Rpl17	1.07815e-15	-0.517604	0.989	0.983	2.06725e-11	5.68329e-39	-0.437627	1	0.999	1.08971e-34	1.07815e-15	1.13666e-38
Rps15a	5.91929e-14	-0.540245	1	0.97	1.13496e-09	6.05929e-39	-0.475482	0.995	0.987	1.16181e-34	5.91929e-14	1.21186e-38
Rpl8	6.28312e-18	-0.51656	1	0.997	1.20473e-13	7.71684e-39	-0.385	1	0.994	1.47963e-34	6.28312e-18	1.54337e-38
Cfi	2.70385e-35	0.604387	0.777	0.159	5.18436e-31	1.28823e-38	0.398132	0.558	0.153	2.47006e-34	2.70385e-35	2.57647e-38
Ascc1	3.34128e-28	0.762325	0.957	0.601	6.40658e-24	1.97177e-38	0.540739	0.898	0.639	3.78067e-34	3.34128e-28	3.94353e-38
Rab5c	1.36699e-24	0.539965	0.979	0.723	2.62106e-20	2.03878e-38	0.537468	0.927	0.731	3.90915e-34	1.36699e-24	4.07756e-38
Grpel1	3.69341e-10	0.324967	0.957	0.787	7.08175e-06	2.51883e-38	0.491405	0.947	0.861	4.82961e-34	3.69341e-10	5.03767e-38
Gpm6a	4.11515e-22	0.452742	0.745	0.23	7.89038e-18	4.15209e-38	0.413606	0.631	0.215	7.96122e-34	4.11515e-22	8.30418e-38
Rpl15	2.47232e-14	-0.482231	1	0.963	4.74043e-10	4.31592e-38	-0.40428	1	0.992	8.27535e-34	2.47232e-14	8.63184e-38
Rps24	9.95519e-15	-0.477544	1	0.98	1.90881e-10	5.56164e-38	-0.425901	1	0.995	1.06639e-33	9.95519e-15	1.11233e-37
Tceal9	1.46217e-10	-0.536748	0.894	0.831	2.80356e-06	5.61873e-38	-0.68706	0.825	0.917	1.07734e-33	1.46217e-10	1.12375e-37
Atp6v1a	7.09729e-19	0.634285	0.979	0.723	1.36083e-14	5.70828e-38	0.517302	0.995	0.845	1.09451e-33	7.09729e-19	1.14166e-37
Cib1	6.17908e-16	0.456266	0.957	0.699	1.18478e-11	9.33333e-38	0.510682	0.937	0.743	1.78957e-33	6.17908e-16	1.86667e-37
Rpl11	2.74848e-14	-0.443715	1	0.966	5.26993e-10	1.03143e-37	-0.418834	0.995	0.991	1.97767e-33	2.74848e-14	2.06287e-37
Rpl13	6.36442e-14	-0.456535	1	0.993	1.22031e-09	1.34038e-37	-0.437697	1	0.999	2.57004e-33	6.36442e-14	2.68076e-37
Gcdh	8.61575e-23	0.478744	0.883	0.497	1.65198e-18	1.76306e-37	0.46199	0.825	0.484	3.3805e-33	8.61575e-23	3.52612e-37
Lgmn	5.345e-24	0.783976	0.957	0.703	1.02485e-19	1.97199e-37	0.566926	0.961	0.831	3.78109e-33	5.345e-24	3.94397e-37
Rps18	5.37405e-14	-0.515772	0.989	0.966	1.03042e-09	2.27517e-37	-0.475751	1	0.993	4.36242e-33	5.37405e-14	4.55035e-37
Rps27a	9.46177e-10	-0.40537	1	0.983	1.8142e-05	5.52202e-37	-0.501379	1	0.998	1.05879e-32	9.46177e-10	1.1044e-36
Rack1	1.81647e-11	-0.364809	1	0.97	3.4829e-07	8.4509e-37	-0.419709	1	0.99	1.62037e-32	1.81647e-11	1.69018e-36
Acox1	4.00204e-29	0.684497	0.904	0.439	7.6735e-25	8.68077e-37	0.455922	0.859	0.48	1.66445e-32	4.00204e-29	1.73615e-36
Thnsl2	6.64552e-33	0.649172	0.968	0.368	1.27421e-28	8.92206e-37	0.463426	0.951	0.527	1.71072e-32	6.64552e-33	1.78441e-36
Rida	3.51393e-29	0.988503	1	0.73	6.73761e-25	1.01413e-36	0.561131	1	0.906	1.94449e-32	3.51393e-29	2.02826e-36
Galnt14	1.43037e-17	0.397073	0.777	0.348	2.7426e-13	1.06738e-36	0.360551	0.694	0.271	2.0466e-32	1.43037e-17	2.13476e-36
Sumo2	3.51855e-15	-0.638187	0.915	0.858	6.74647e-11	1.07397e-36	-0.47544	0.903	0.945	2.05923e-32	3.51855e-15	2.14794e-36
Rps23	1.24327e-14	-0.517011	1	0.966	2.38384e-10	1.30853e-36	-0.434746	1	0.99	2.50898e-32	1.24327e-14	2.61707e-36
Tmem19	6.8551e-15	0.327958	0.723	0.399	1.3144e-10	1.55161e-36	0.402591	0.723	0.321	2.97507e-32	6.8551e-15	3.10323e-36
Rps16	2.72848e-12	-0.457853	1	0.966	5.23159e-08	1.59429e-36	-0.463036	1	0.994	3.05689e-32	2.72848e-12	3.18857e-36
Npm1	4.7478e-14	-0.699719	1	0.932	9.10342e-10	1.78449e-36	-0.578637	0.99	0.984	3.42158e-32	4.7478e-14	3.56898e-36
Rpl6	1.65168e-13	-0.400506	1	0.983	3.16694e-09	1.7935e-36	-0.397793	1	0.997	3.43886e-32	1.65168e-13	3.587e-36
Grina	1.00979e-20	0.594374	0.936	0.655	1.93617e-16	1.94756e-36	0.470996	0.922	0.724	3.73426e-32	1.00979e-20	3.89513e-36
Rpl37	1.49005e-14	-0.522567	1	0.973	2.85703e-10	2.66789e-36	-0.436621	1	0.993	5.1154e-32	1.49005e-14	5.33577e-36
Maf	1.46692e-27	0.85363	0.957	0.446	2.81267e-23	5.2817e-36	0.693007	0.845	0.444	1.01271e-31	1.46692e-27	1.05634e-35
Cd63	1.01989e-25	0.629542	1	0.956	1.95554e-21	5.42218e-36	0.409092	1	0.993	1.03965e-31	1.01989e-25	1.08444e-35
Rpl37a	5.12655e-11	-0.303714	1	0.986	9.82965e-07	7.58826e-36	-0.368578	1	0.995	1.45497e-31	5.12655e-11	1.51765e-35
Mgst1	2.76836e-12	-0.803425	0.245	0.601	5.30804e-08	8.52723e-36	-0.925137	0.17	0.63	1.63501e-31	2.76836e-12	1.70545e-35
Tomm5	8.46418e-11	0.292662	0.979	0.784	1.62292e-06	2.51696e-35	0.484912	0.947	0.812	4.82601e-31	8.46418e-11	5.03392e-35
Rpl18	1.13832e-13	-0.46279	1	0.963	2.18261e-09	3.60141e-35	-0.398338	0.995	0.984	6.90535e-31	1.13832e-13	7.20282e-35
Sh3bp5	1.55719e-08	0.313637	0.574	0.318	0.000298577	4.01975e-35	0.362375	0.612	0.205	7.70748e-31	1.55719e-08	8.03951e-35
Fahd1	4.92931e-15	0.427776	0.915	0.625	9.45146e-11	4.15098e-35	0.457146	0.922	0.647	7.95909e-31	4.92931e-15	8.30196e-35
Susd2	4.75949e-17	0.36492	0.681	0.233	9.12586e-13	5.5558e-35	0.374534	0.646	0.229	1.06527e-30	4.75949e-17	1.11116e-34
Rpl34	2.97748e-14	-0.542041	1	0.949	5.70902e-10	6.07954e-35	-0.425833	1	0.985	1.16569e-30	2.97748e-14	1.21591e-34
Ahcyl2	7.83921e-17	0.522938	0.787	0.443	1.50309e-12	8.12237e-35	0.420772	0.835	0.465	1.55738e-30	7.83921e-17	1.62447e-34
Rps28	6.97908e-07	-0.277056	1	0.966	0.0133817	1.01347e-34	-0.379243	1	0.992	1.94322e-30	6.97908e-07	2.02693e-34
Ebp	2.3685e-07	0.260186	0.713	0.497	0.00454136	1.05716e-34	0.490588	0.869	0.553	2.02699e-30	2.3685e-07	2.11431e-34
Asl	3.25152e-23	0.694583	0.894	0.524	6.23447e-19	1.48123e-34	0.533881	0.845	0.546	2.84011e-30	3.25152e-23	2.96246e-34
Mfsd4b5	1.70761e-34	0.507494	0.606	0.047	3.27417e-30	5.17573e-33	0.255113	0.296	0.038	9.92394e-29	5.17573e-33	3.41522e-34
Rps13	9.80519e-12	-0.406335	1	0.97	1.88005e-07	1.89643e-34	-0.413442	0.995	0.991	3.63621e-30	9.80519e-12	3.79285e-34
Rplp2	5.34611e-11	-0.362805	0.989	0.97	1.02506e-06	2.40867e-34	-0.407567	1	0.987	4.61838e-30	5.34611e-11	4.81734e-34
Gsr	3.99985e-12	0.332281	0.851	0.652	7.66931e-08	4.25075e-34	0.5026	0.903	0.655	8.15039e-30	3.99985e-12	8.50151e-34
Eif3h	1.38522e-08	-0.354061	0.915	0.845	0.000265602	4.71401e-34	-0.426011	0.956	0.941	9.03864e-30	1.38522e-08	9.42801e-34
Hint2	3.55468e-15	0.39656	0.926	0.72	6.81574e-11	4.96642e-34	0.457095	0.961	0.839	9.52261e-30	3.55468e-15	9.93284e-34
Rps8	1.79258e-08	-0.36907	1	0.993	0.00034371	7.11443e-34	-0.409485	1	0.999	1.36412e-29	1.79258e-08	1.42289e-33
Rpl24	9.84125e-10	-0.333785	1	0.97	1.88696e-05	1.0174e-33	-0.328103	1	0.991	1.95076e-29	9.84125e-10	2.0348e-33
Slc23a3	2.25979e-13	0.286797	0.511	0.166	4.33292e-09	1.25617e-33	0.253876	0.505	0.135	2.40857e-29	2.25979e-13	2.51233e-33
Afm	1.25613e-19	0.333016	0.766	0.301	2.4085e-15	1.31752e-33	0.332152	0.689	0.28	2.52621e-29	1.25613e-19	2.63504e-33
Nedd4	0.000176107	-0.288021	0.968	0.861	1	1.36351e-33	-0.500947	0.971	0.953	2.6144e-29	0.000176107	2.72702e-33
Rpl3	1.07202e-14	-0.548232	1	0.97	2.05549e-10	1.50331e-33	-0.449155	1	0.995	2.88245e-29	1.07202e-14	3.00663e-33
Mcfd2	2.51684e-11	0.275419	0.787	0.544	4.82578e-07	2.07872e-33	0.383293	0.854	0.49	3.98574e-29	2.51684e-11	4.15744e-33
Pdcd4	2.50956e-14	-0.602518	0.234	0.632	4.81183e-10	2.8e-33	-0.530891	0.286	0.713	5.36871e-29	2.50956e-14	5.59999e-33
Acaa1b	2.67194e-21	0.571228	0.904	0.432	5.12317e-17	3.06504e-33	0.427885	0.859	0.443	5.8769e-29	2.67194e-21	6.13008e-33
Dhfr	4.07115e-14	0.468827	0.819	0.497	7.80603e-10	3.11727e-33	0.420909	0.748	0.358	5.97704e-29	4.07115e-14	6.23453e-33
Ddah1	7.00647e-17	0.543846	0.968	0.696	1.34342e-12	3.13703e-33	0.467722	0.985	0.827	6.01494e-29	7.00647e-17	6.27406e-33
Fstl1	5.3919e-21	-1.36405	0.181	0.709	1.03384e-16	3.56627e-33	-1.13097	0.18	0.607	6.83797e-29	5.3919e-21	7.13254e-33
Ppt2	1.20596e-27	0.631302	0.904	0.514	2.31231e-23	4.12961e-33	0.451449	0.854	0.571	7.91812e-29	1.20596e-27	8.25922e-33
Enpep	7.10836e-17	0.462539	0.862	0.453	1.36296e-12	4.8477e-33	0.461414	0.845	0.512	9.29499e-29	7.10836e-17	9.69541e-33
Tpi1	9.07417e-15	0.413292	0.989	0.912	1.73988e-10	5.43042e-33	0.383011	1	0.991	1.04123e-28	9.07417e-15	1.08608e-32
Mdk	1.79733e-09	-1.20994	0.617	0.726	3.44619e-05	5.54863e-33	-1.16387	0.432	0.746	1.06389e-28	1.79733e-09	1.10973e-32
Rpl14	2.85339e-12	-0.422509	1	0.963	5.47109e-08	6.89203e-33	-0.397074	1	0.991	1.32148e-28	2.85339e-12	1.37841e-32
Eif3f	3.12577e-05	-0.344088	0.904	0.841	0.599336	7.74408e-33	-0.440026	0.927	0.94	1.48485e-28	3.12577e-05	1.54882e-32
Ghr	1.4382e-17	0.387701	0.894	0.439	2.7576e-13	7.79632e-33	0.381514	0.84	0.445	1.49487e-28	1.4382e-17	1.55926e-32
Esd	5.3347e-20	0.535771	1	0.892	1.02288e-15	9.35133e-33	0.42086	0.995	0.977	1.79302e-28	5.3347e-20	1.87027e-32
Tysnd1	9.6606e-17	0.43315	0.84	0.453	1.85232e-12	1.23723e-32	0.394945	0.748	0.39	2.37226e-28	9.6606e-17	2.47445e-32
Rps21	6.91398e-13	-0.463141	1	0.97	1.32569e-08	2.35258e-32	-0.414272	0.995	0.99	4.51083e-28	6.91398e-13	4.70515e-32
Atrx	4.32057e-10	-0.598663	0.67	0.774	8.28425e-06	2.45129e-32	-0.582203	0.621	0.868	4.7001e-28	4.32057e-10	4.90258e-32
Mccc1	2.25583e-15	0.429245	0.798	0.47	4.32534e-11	2.77326e-32	0.501623	0.723	0.349	5.31745e-28	2.25583e-15	5.54652e-32
Cltc	4.26668e-19	0.449084	0.968	0.726	8.18094e-15	3.20863e-32	0.427405	0.932	0.768	6.15222e-28	4.26668e-19	6.41725e-32
Rpl10a	1.31652e-15	-0.561763	1	0.959	2.5243e-11	3.219e-32	-0.450819	1	0.994	6.17211e-28	1.31652e-15	6.438e-32
Rpl32	7.47951e-12	-0.456624	1	0.973	1.43412e-07	3.38638e-32	-0.453072	0.995	0.994	6.49304e-28	7.47951e-12	6.77275e-32
Cpox	2.98496e-15	0.38745	0.904	0.578	5.72337e-11	3.86252e-32	0.475025	0.83	0.503	7.406e-28	2.98496e-15	7.72505e-32
Atp6v1b2	1.65082e-17	0.46027	0.862	0.622	3.16529e-13	4.14484e-32	0.438258	0.888	0.639	7.94732e-28	1.65082e-17	8.28969e-32
Smpd2	1.05112e-18	0.462558	0.851	0.49	2.01542e-14	5.72175e-32	0.394144	0.806	0.479	1.09709e-27	1.05112e-18	1.14435e-31
Tmem256	1.51081e-15	0.397492	0.968	0.77	2.89683e-11	7.56252e-32	0.40408	0.966	0.876	1.45004e-27	1.51081e-15	1.5125e-31
Rps10	8.78963e-12	-0.435903	1	0.99	1.68532e-07	7.91245e-32	-0.414878	1	0.995	1.51713e-27	8.78963e-12	1.58249e-31
Rpl4	2.7422e-09	-0.332243	0.979	0.943	5.2579e-05	8.25962e-32	-0.377401	1	0.991	1.5837e-27	2.7422e-09	1.65192e-31
Itgb8	8.49787e-13	0.284204	0.447	0.132	1.62938e-08	8.68949e-32	0.284121	0.539	0.163	1.66612e-27	8.49787e-13	1.7379e-31
Rps26	3.24998e-09	-0.416527	0.989	0.943	6.23152e-05	8.97359e-32	-0.457469	1	0.988	1.7206e-27	3.24998e-09	1.79472e-31
Anp32b	6.95991e-19	-0.898606	0.883	0.872	1.33449e-14	9.36441e-32	-0.535304	0.879	0.935	1.79553e-27	6.95991e-19	1.87288e-31
Rpl27a	2.07599e-10	-0.402712	1	0.973	3.9805e-06	1.07492e-31	-0.4208	1	0.992	2.06105e-27	2.07599e-10	2.14983e-31
Aspa	1.57204e-27	0.714329	0.872	0.301	3.01423e-23	1.23388e-31	0.433598	0.893	0.436	2.36585e-27	1.57204e-27	2.46777e-31
Gm42418	2.19307e-15	0.537088	1	1	4.205e-11	1.28539e-31	0.808818	1	1	2.4646e-27	2.19307e-15	2.57077e-31
Calml4	1.00789e-25	0.951539	0.989	0.584	1.93254e-21	1.46106e-31	0.58136	1	0.692	2.80144e-27	1.00789e-25	2.92212e-31
Nit2	5.43852e-16	0.504222	0.894	0.608	1.04278e-11	2.26799e-31	0.44171	0.859	0.637	4.34865e-27	5.43852e-16	4.53599e-31
Hist1h2bc	1.54472e-23	0.767899	0.926	0.557	2.96184e-19	2.58478e-31	0.502323	0.985	0.761	4.95606e-27	1.54472e-23	5.16956e-31
Ncoa7	2.72206e-20	0.495529	0.894	0.51	5.21928e-16	3.06903e-31	0.474974	0.917	0.651	5.88457e-27	2.72206e-20	6.13807e-31
Hbegf	4.06485e-14	0.29058	0.67	0.274	7.79394e-10	3.21777e-31	0.376379	0.675	0.257	6.16976e-27	4.06485e-14	6.43554e-31
Ttc3	1.14042e-08	-0.470979	0.787	0.804	0.000218665	3.4956e-31	-0.54664	0.728	0.883	6.70247e-27	1.14042e-08	6.9912e-31
Pfdn1	5.33863e-11	0.252645	0.989	0.814	1.02363e-06	3.80682e-31	0.454557	0.971	0.917	7.2992e-27	5.33863e-11	7.61364e-31
Dera	6.15458e-10	0.283341	0.862	0.686	1.18008e-05	4.97881e-31	0.442331	0.903	0.673	9.54637e-27	6.15458e-10	9.95761e-31
Serf1	3.65055e-09	-0.517961	0.702	0.757	6.99956e-05	6.65304e-31	-0.559902	0.646	0.858	1.27565e-26	3.65055e-09	1.33061e-30
Slc39a5	2.01548e-20	0.591226	0.915	0.402	3.86448e-16	6.94079e-31	0.448912	0.927	0.464	1.33083e-26	2.01548e-20	1.38816e-30
Slc5a12	3.55199e-19	0.451483	0.33	0.02	6.81058e-15	7.1798e-31	0.289769	0.194	0.009	1.37666e-26	3.55199e-19	1.43596e-30
Pgpep1	5.15869e-16	0.414287	0.851	0.507	9.89127e-12	7.71659e-31	0.409784	0.825	0.563	1.47958e-26	5.15869e-16	1.54332e-30
Hes1	4.33386e-15	-0.879706	0.128	0.578	8.30975e-11	8.84689e-31	-0.819119	0.083	0.527	1.6963e-26	4.33386e-15	1.76938e-30
Pou3f3	0.00332263	-0.296292	0.33	0.449	1	1.02172e-30	-0.684925	0.393	0.74	1.95905e-26	0.00332263	2.04345e-30
Shmt2	9.9652e-15	0.337677	0.798	0.466	1.91073e-10	1.14315e-30	0.365452	0.762	0.405	2.19188e-26	9.9652e-15	2.2863e-30
Myo15b	6.08327e-16	0.348582	0.66	0.233	1.16641e-11	1.16694e-30	0.262895	0.568	0.185	2.23749e-26	6.08327e-16	2.33388e-30
Klc4	6.48388e-14	0.385885	0.809	0.476	1.24322e-09	1.70192e-30	0.388656	0.767	0.432	3.26327e-26	6.48388e-14	3.40385e-30
Ptma	3.31982e-22	-0.941019	0.979	0.98	6.36541e-18	1.78828e-30	-0.569057	1	0.988	3.42884e-26	3.31982e-22	3.57655e-30
Rogdi	1.13266e-12	0.279172	0.777	0.47	2.17176e-08	3.0602e-30	0.278835	0.621	0.238	5.86762e-26	1.13266e-12	6.12039e-30
Vps29	2.91673e-12	0.35764	0.947	0.76	5.59254e-08	3.53296e-30	0.403084	0.951	0.842	6.77409e-26	2.91673e-12	7.06591e-30
Renbp	1.39879e-23	0.499011	0.755	0.277	2.68204e-19	4.36901e-30	0.414195	0.665	0.286	8.37714e-26	1.39879e-23	8.73802e-30
Glrx	5.50914e-17	0.431915	0.819	0.446	1.05632e-12	5.0558e-30	0.396702	0.689	0.329	9.69398e-26	5.50914e-17	1.01116e-29
Cisd3	4.35461e-14	0.370448	0.691	0.348	8.34952e-10	5.73363e-30	0.342839	0.733	0.361	1.09937e-25	4.35461e-14	1.14673e-29
Got2	2.25088e-12	0.323993	0.957	0.791	4.31584e-08	5.80143e-30	0.385214	0.981	0.816	1.11237e-25	2.25088e-12	1.16029e-29
Rpl28	6.74668e-08	-0.305034	1	0.97	0.00129361	6.03999e-30	-0.379468	1	0.993	1.15811e-25	6.74668e-08	1.208e-29
Rpl23	3.62252e-10	-0.33315	1	0.976	6.94581e-06	6.46152e-30	-0.330111	1	0.999	1.23893e-25	3.62252e-10	1.2923e-29
Cbx1	4.14755e-07	-0.433139	0.83	0.821	0.00795252	1.02402e-29	-0.488652	0.762	0.902	1.96345e-25	4.14755e-07	2.04803e-29
Sfpq	4.51402e-09	-0.576388	0.787	0.824	8.65518e-05	1.05203e-29	-0.555629	0.636	0.851	2.01716e-25	4.51402e-09	2.10406e-29
Gm1673	1.65972e-15	-0.68476	0.309	0.696	3.18235e-11	1.06905e-29	-0.517988	0.248	0.649	2.0498e-25	1.65972e-15	2.1381e-29
Gpc4	1.32305e-18	0.490239	0.904	0.605	2.53682e-14	1.1015e-29	0.441062	0.966	0.723	2.11201e-25	1.32305e-18	2.203e-29
Slc38a2	1.27489e-06	-0.436258	0.596	0.72	0.0244447	1.23636e-29	-0.62809	0.558	0.817	2.37059e-25	1.27489e-06	2.47272e-29
Naca	1.70033e-10	-0.335428	1	0.949	3.26022e-06	1.23739e-29	-0.311697	1	0.988	2.37257e-25	1.70033e-10	2.47477e-29
Dpp4	1.30803e-15	0.428151	0.957	0.642	2.50801e-11	1.25307e-29	0.455837	0.971	0.768	2.40264e-25	1.30803e-15	2.50615e-29
Eaf2	1.34354e-08	0.30655	0.638	0.375	0.00025761	1.39419e-29	0.332015	0.558	0.197	2.67322e-25	1.34354e-08	2.78838e-29
Sigirr	2.72022e-21	0.562448	0.809	0.385	5.21575e-17	1.49977e-29	0.403689	0.801	0.45	2.87566e-25	2.72022e-21	2.99955e-29
Tmem97	1.39918e-09	0.279263	0.723	0.426	2.68278e-05	1.51422e-29	0.273035	0.617	0.245	2.90337e-25	1.39918e-09	3.02844e-29
Tprkb	5.40265e-17	0.374141	0.787	0.459	1.0359e-12	1.77658e-29	0.363575	0.762	0.407	3.40641e-25	5.40265e-17	3.55316e-29
Hacl1	5.5401e-19	0.415309	0.713	0.287	1.06226e-14	2.25757e-29	0.382813	0.709	0.311	4.32867e-25	5.5401e-19	4.51514e-29
Cyp51	2.88634e-16	0.456308	0.894	0.557	5.53428e-12	2.5612e-29	0.411832	0.908	0.551	4.91085e-25	2.88634e-16	5.12241e-29
Glul	1.34619e-16	0.40245	0.957	0.541	2.58119e-12	3.12694e-29	0.403534	0.937	0.549	5.99559e-25	1.34619e-16	6.25387e-29
Rgl1	6.09349e-11	0.305422	0.585	0.257	1.16837e-06	4.12296e-29	0.307655	0.621	0.243	7.90536e-25	6.09349e-11	8.24591e-29
Hnrnpc	4.83865e-08	-0.431024	0.83	0.818	0.000927763	4.25811e-29	-0.457091	0.83	0.903	8.1645e-25	4.83865e-08	8.51622e-29
Eps8	7.36705e-13	0.3125	0.883	0.49	1.41256e-08	4.53039e-29	0.368599	0.883	0.533	8.68657e-25	7.36705e-13	9.06078e-29
Dhrs4	1.10431e-14	0.456651	0.894	0.649	2.1174e-10	4.54818e-29	0.460018	0.917	0.735	8.72068e-25	1.10431e-14	9.09636e-29
Lamp1	7.4671e-18	0.441183	0.979	0.848	1.43174e-13	4.95503e-29	0.39483	0.99	0.939	9.50077e-25	7.4671e-18	9.91005e-29
Pnisr	2.84585e-07	-0.463655	0.745	0.791	0.00545662	7.49989e-29	-0.496891	0.646	0.873	1.43803e-24	2.84585e-07	1.49998e-28
Cisd1	4.93164e-11	0.306893	0.989	0.831	9.45592e-07	7.87407e-29	0.407967	0.99	0.91	1.50977e-24	4.93164e-11	1.57481e-28
Prss8	9.26973e-24	0.52328	0.968	0.527	1.77738e-19	8.45062e-29	0.384343	0.917	0.637	1.62032e-24	9.26973e-24	1.69012e-28
Rps3	5.03504e-10	-0.382708	1	0.983	9.65419e-06	9.42076e-29	-0.343953	1	0.994	1.80634e-24	5.03504e-10	1.88415e-28
Npnt	9.1139e-17	0.556363	0.979	0.686	1.7475e-12	1.03718e-28	0.492007	1	0.765	1.98869e-24	9.1139e-17	2.07436e-28
Eef1b2	1.33226e-13	-0.516396	0.989	0.926	2.55447e-09	1.35936e-28	-0.397661	0.99	0.971	2.60643e-24	1.33226e-13	2.71871e-28
Id3	3.99674e-12	-1.13018	0.532	0.736	7.66334e-08	1.44726e-28	-1.27837	0.456	0.743	2.77498e-24	3.99674e-12	2.89453e-28
Slc9a3r1	4.48742e-13	0.409672	0.947	0.652	8.60419e-09	2.2348e-28	0.430875	0.942	0.628	4.285e-24	4.48742e-13	4.4696e-28
Syne2	0.00137989	-0.327159	0.617	0.662	1	3.05832e-28	-0.608923	0.621	0.831	5.86403e-24	0.00137989	6.11665e-28
2310039H08Rik	8.97731e-18	0.486716	0.904	0.649	1.72131e-13	3.6149e-28	0.456391	0.917	0.74	6.93121e-24	8.97731e-18	7.2298e-28
Itgb6	4.58138e-15	0.382464	0.809	0.392	8.78434e-11	5.0258e-28	0.389006	0.733	0.361	9.63647e-24	4.58138e-15	1.00516e-27
Rps12	9.51629e-10	-0.445639	1	0.953	1.82465e-05	6.45484e-28	-0.452952	1	0.988	1.23765e-23	9.51629e-10	1.29097e-27
Auh	4.06368e-11	0.270516	0.883	0.622	7.7917e-07	7.62432e-28	0.372728	0.859	0.584	1.46189e-23	4.06368e-11	1.52486e-27
Gstt2	9.16683e-16	0.391799	0.819	0.459	1.75765e-11	7.77464e-28	0.360774	0.845	0.497	1.49071e-23	9.16683e-16	1.55493e-27
Cox7a2l	4.74861e-06	-0.265043	0.989	0.872	0.0910499	9.74887e-28	-0.394888	0.947	0.95	1.86925e-23	4.74861e-06	1.94977e-27
Rpl39	3.31609e-11	-0.376464	1	0.986	6.35827e-07	1.56871e-27	-0.351965	1	0.994	3.00784e-23	3.31609e-11	3.13742e-27
Scrn2	8.3672e-19	0.444801	0.915	0.53	1.60433e-14	1.93353e-27	0.408585	0.859	0.61	3.70735e-23	8.3672e-19	3.86706e-27
Abat	1.46517e-21	0.484815	0.787	0.348	2.80932e-17	2.23689e-27	0.323887	0.665	0.312	4.28902e-23	1.46517e-21	4.47379e-27
Akr1a1	1.80589e-21	0.745955	1	0.875	3.46262e-17	2.24559e-27	0.516585	0.995	0.961	4.30569e-23	1.80589e-21	4.49117e-27
Pepd	1.8032e-13	0.321016	0.947	0.736	3.45746e-09	2.38653e-27	0.401392	0.961	0.795	4.57593e-23	1.8032e-13	4.77305e-27
Hoxb6	6.43346e-08	-0.381014	0.234	0.53	0.00123355	2.51239e-27	-0.481512	0.354	0.698	4.81726e-23	6.43346e-08	5.02479e-27
Galnt1	6.93801e-14	0.379259	0.798	0.514	1.33029e-09	3.64365e-27	0.407772	0.816	0.523	6.98634e-23	6.93801e-14	7.2873e-27
Abca3	6.71643e-27	0.595476	0.894	0.439	1.28781e-22	8.27533e-27	0.431669	0.806	0.554	1.58671e-22	8.27533e-27	1.34329e-26
Tubb5	2.98059e-10	-0.959282	0.872	0.845	5.71498e-06	7.53904e-27	-0.709561	0.748	0.871	1.44554e-22	2.98059e-10	1.50781e-26
Psip1	7.02816e-12	-0.641701	0.457	0.703	1.34758e-07	8.62611e-27	-0.452076	0.359	0.705	1.65397e-22	7.02816e-12	1.72522e-26
Ube2e3	6.20526e-06	-0.384744	0.691	0.726	0.11898	8.77281e-27	-0.498776	0.539	0.828	1.6821e-22	6.20526e-06	1.75456e-26
Pafah2	6.56707e-14	0.264079	0.606	0.257	1.25917e-09	9.6678e-27	0.273685	0.578	0.227	1.8537e-22	6.56707e-14	1.93356e-26
Rpl26	5.86312e-12	-0.391295	1	0.956	1.12419e-07	9.94774e-27	-0.303505	1	0.984	1.90738e-22	5.86312e-12	1.98955e-26
Vmp1	5.84288e-16	0.463964	0.968	0.76	1.12031e-11	1.06871e-26	0.372102	0.961	0.823	2.04914e-22	5.84288e-16	2.13742e-26
Rpl13a	0.000991287	-0.274402	0.915	0.811	1	1.11693e-26	-0.450258	0.927	0.935	2.14161e-22	0.000991287	2.23387e-26
Tyw3	2.07099e-10	0.280085	0.606	0.314	3.97091e-06	1.63083e-26	0.328217	0.723	0.334	3.12695e-22	2.07099e-10	3.26166e-26
Pgm2	5.13566e-13	0.295815	0.83	0.541	9.84711e-09	1.83633e-26	0.340065	0.859	0.563	3.52097e-22	5.13566e-13	3.67265e-26
Btg1	3.15999e-08	-0.418126	0.426	0.649	0.000605896	2.60738e-26	-0.661158	0.505	0.775	4.99939e-22	3.15999e-08	5.21476e-26
Hnrnpk	6.56379e-12	-0.519636	0.926	0.885	1.25854e-07	2.92609e-26	-0.37967	0.947	0.957	5.61049e-22	6.56379e-12	5.85219e-26
Rps19	4.69016e-07	-0.369018	1	0.99	0.00899292	3.82341e-26	-0.40382	1	0.997	7.33101e-22	4.69016e-07	7.64683e-26
Top1	0.000422797	-0.271364	0.936	0.848	1	6.10653e-26	-0.441111	0.864	0.929	1.17087e-21	0.000422797	1.22131e-25
Lipa	2.04105e-19	0.613175	0.702	0.301	3.91352e-15	6.11674e-26	0.482328	0.675	0.35	1.17282e-21	2.04105e-19	1.22335e-25
Ift74	0.00164727	-0.283055	0.511	0.618	1	7.31856e-26	-0.442613	0.476	0.756	1.40326e-21	0.00164727	1.46371e-25
Bptf	8.67214e-05	-0.319797	0.691	0.716	1	8.02116e-26	-0.455286	0.578	0.797	1.53798e-21	8.67214e-05	1.60423e-25
Cfdp1	6.27421e-06	-0.376826	0.777	0.784	0.120302	8.34513e-26	-0.409247	0.767	0.879	1.6001e-21	6.27421e-06	1.66903e-25
Slc33a1	1.37011e-17	0.348826	0.745	0.351	2.62705e-13	8.90099e-26	0.314513	0.704	0.363	1.70668e-21	1.37011e-17	1.7802e-25
Zfp644	5.73024e-06	-0.279771	0.521	0.679	0.109872	9.14503e-26	-0.412246	0.398	0.739	1.75347e-21	5.73024e-06	1.82901e-25
Ctxn1	4.99865e-14	-0.580244	0.181	0.598	9.58441e-10	9.63193e-26	-0.490047	0.136	0.52	1.84683e-21	4.99865e-14	1.92639e-25
Arid1a	0.000583559	-0.263796	0.574	0.682	1	1.00847e-25	-0.396086	0.403	0.733	1.93364e-21	0.000583559	2.01694e-25
Mrps21	1.99409e-13	0.337924	0.968	0.801	3.82346e-09	1.07334e-25	0.333822	0.956	0.875	2.05803e-21	1.99409e-13	2.14669e-25
Id4	1.13474e-07	-0.281293	0.117	0.405	0.00217576	1.15761e-25	-0.709476	0.18	0.545	2.2196e-21	1.13474e-07	2.31522e-25
Eva1b	0.00347919	-0.278743	0.489	0.591	1	1.17001e-25	-0.590637	0.417	0.709	2.24338e-21	0.00347919	2.34003e-25
Glud1	1.35474e-25	0.673137	1	0.882	2.59757e-21	3.44182e-22	0.36135	1	0.966	6.59935e-18	3.44182e-22	2.70948e-25
Ppdpf	0.000510285	-0.277592	0.681	0.75	1	1.4461e-25	-0.423027	0.621	0.832	2.77276e-21	0.000510285	2.89221e-25
Adh5	5.84381e-10	0.327721	0.979	0.811	1.12049e-05	1.88787e-25	0.35234	0.981	0.929	3.61981e-21	5.84381e-10	3.77575e-25
Pum3	2.42588e-06	0.261819	0.766	0.564	0.0465138	2.26848e-25	0.391682	0.83	0.576	4.34958e-21	2.42588e-06	4.53695e-25
Hibadh	2.79924e-13	0.326083	0.947	0.764	5.36727e-09	2.31519e-25	0.337761	0.961	0.868	4.43915e-21	2.79924e-13	4.63039e-25
Zcchc11	1.28685e-08	-0.43571	0.479	0.682	0.000246741	2.34468e-25	-0.439781	0.481	0.763	4.49569e-21	1.28685e-08	4.68936e-25
Slc3a2	1.18681e-11	0.47495	0.926	0.703	2.27559e-07	3.57457e-25	0.43657	0.888	0.659	6.85388e-21	1.18681e-11	7.14914e-25
Arxes2	3.36588e-19	0.487242	0.713	0.307	6.45373e-15	3.68736e-25	0.35112	0.602	0.277	7.07015e-21	3.36588e-19	7.37472e-25
Rcn2	2.03101e-08	-0.353838	0.255	0.537	0.000389426	4.03679e-25	-0.345514	0.199	0.592	7.74014e-21	2.03101e-08	8.07358e-25
Rpl10	2.8006e-08	-0.322643	1	0.939	0.000536987	4.31429e-25	-0.327483	0.995	0.986	8.27222e-21	2.8006e-08	8.62858e-25
Prdx1	4.49139e-07	0.26542	1	0.905	0.00861179	4.92618e-25	0.346771	1	0.969	9.44545e-21	4.49139e-07	9.85236e-25
Ccdc34	3.42727e-06	-0.50168	0.585	0.696	0.0657144	7.6897e-25	-0.576899	0.612	0.802	1.47442e-20	3.42727e-06	1.53794e-24
Fzd4	0.00444204	-0.251787	0.404	0.5	1	8.68297e-25	-0.57152	0.485	0.749	1.66487e-20	0.00444204	1.73659e-24
Hoxb4	3.9314e-06	-0.398706	0.394	0.564	0.0753807	1.13714e-24	-0.486521	0.413	0.719	2.18035e-20	3.9314e-06	2.27428e-24
Kdm5b	0.000795098	-0.322442	0.553	0.642	1	1.23478e-24	-0.429383	0.451	0.741	2.36757e-20	0.000795098	2.46956e-24
Marcks	2.45404e-09	-0.533666	0.33	0.622	4.70537e-05	1.26055e-24	-0.581374	0.252	0.608	2.41697e-20	2.45404e-09	2.52109e-24
Set	6.51116e-08	-0.509923	0.936	0.845	0.00124845	1.56229e-24	-0.44014	0.922	0.939	2.99554e-20	6.51116e-08	3.12458e-24
Tubb4b	2.40605e-11	0.386272	0.968	0.787	4.61336e-07	1.66954e-24	0.501475	0.908	0.747	3.20118e-20	2.40605e-11	3.33908e-24
Scd2	1.02189e-22	0.984133	0.968	0.747	1.95937e-18	1.71437e-24	0.796044	0.835	0.671	3.28713e-20	1.02189e-22	3.42874e-24
Sfxn2	1.22162e-16	0.372278	0.851	0.557	2.34233e-12	1.99397e-24	0.381051	0.791	0.505	3.82323e-20	1.22162e-16	3.98794e-24
Rpl35a	2.65699e-08	-0.287686	1	0.98	0.000509452	2.66125e-24	-0.29228	1	0.995	5.10267e-20	2.65699e-08	5.32249e-24
Ptms	3.85832e-05	-0.354309	0.947	0.845	0.739794	2.74116e-24	-0.476329	0.893	0.926	5.2559e-20	3.85832e-05	5.48232e-24
Ckap4	2.85598e-11	-0.490512	0.415	0.689	5.47606e-07	2.86689e-24	-0.41852	0.408	0.706	5.49698e-20	2.85598e-11	5.73378e-24
Smarcc1	3.22584e-08	-0.497231	0.521	0.679	0.000618523	3.54221e-24	-0.44316	0.442	0.731	6.79183e-20	3.22584e-08	7.08442e-24
Aqp11	3.66324e-24	0.4764	0.851	0.385	7.0239e-20	1.39529e-20	0.332981	0.723	0.436	2.67532e-16	1.39529e-20	7.32648e-24
Sfr1	8.37142e-05	-0.331176	0.777	0.753	1	4.01329e-24	-0.421795	0.748	0.887	7.69507e-20	8.37142e-05	8.02657e-24
Mfsd1	1.57461e-12	0.416495	0.84	0.581	3.01916e-08	4.21759e-24	0.327773	0.825	0.561	8.08681e-20	1.57461e-12	8.43519e-24
Atp5g2	9.48639e-15	-0.438786	0.957	0.909	1.81892e-10	4.26964e-24	-0.294779	0.985	0.97	8.18661e-20	9.48639e-15	8.53928e-24
Trmt112	8.65005e-06	-0.358892	0.649	0.709	0.165856	4.59314e-24	-0.441227	0.66	0.843	8.80689e-20	8.65005e-06	9.18628e-24
Dhrs3	1.69968e-20	0.424443	0.777	0.324	3.25896e-16	6.7874e-24	0.33602	0.65	0.321	1.30142e-19	1.69968e-20	1.35748e-23
Snrpg	1.17726e-07	-0.427026	0.787	0.767	0.00225728	7.4559e-24	-0.423158	0.694	0.871	1.42959e-19	1.17726e-07	1.49118e-23
Hoxb2	2.65262e-05	-0.370218	0.34	0.53	0.508613	7.91982e-24	-0.454148	0.398	0.704	1.51855e-19	2.65262e-05	1.58396e-23
Uap1l1	3.11503e-20	0.598168	0.702	0.274	5.97275e-16	7.97239e-24	0.324728	0.607	0.271	1.52863e-19	3.11503e-20	1.59448e-23
Nit1	3.12061e-13	0.421084	0.755	0.497	5.98345e-09	8.28846e-24	0.346118	0.879	0.639	1.58923e-19	3.12061e-13	1.65769e-23
Ankrd33b	8.2292e-15	0.30182	0.638	0.226	1.57787e-10	9.41996e-24	0.283349	0.655	0.294	1.80618e-19	8.2292e-15	1.88399e-23
Sec23b	2.82546e-09	0.294904	0.713	0.476	5.41755e-05	9.57238e-24	0.287264	0.83	0.564	1.83541e-19	2.82546e-09	1.91448e-23
Phip	1.62591e-05	-0.335575	0.447	0.645	0.311753	1.13786e-23	-0.444325	0.374	0.695	2.18174e-19	1.62591e-05	2.27572e-23
Ubb	1.30574e-07	-0.288184	1	0.98	0.00250363	1.33842e-23	-0.32087	1	0.988	2.56629e-19	1.30574e-07	2.67684e-23
Ier2	2.90847e-07	-0.622166	0.447	0.639	0.0055767	1.84068e-23	-0.801578	0.592	0.8	3.52932e-19	2.90847e-07	3.68137e-23
Fam92a	1.94927e-08	-0.355641	0.383	0.632	0.000373753	2.45903e-23	-0.335704	0.291	0.651	4.71495e-19	1.94927e-08	4.91806e-23
Khk	2.93055e-15	0.328433	0.734	0.355	5.61903e-11	2.53446e-23	0.394356	0.782	0.519	4.85956e-19	2.93055e-15	5.06891e-23
Mtch1	2.404e-05	-0.329438	0.915	0.848	0.460943	2.73187e-23	-0.568137	0.854	0.927	5.23809e-19	2.404e-05	5.46374e-23
Qprt	1.37969e-08	0.260551	0.713	0.399	0.000264541	3.22101e-23	0.304514	0.733	0.366	6.17596e-19	1.37969e-08	6.44202e-23
Junb	0.0260672	-0.343552	0.426	0.517	1	3.36089e-23	-0.920303	0.481	0.724	6.44417e-19	0.0260672	6.72178e-23
Slc16a12	6.92069e-16	0.380553	0.723	0.324	1.32697e-11	3.51336e-23	0.326211	0.655	0.32	6.73651e-19	6.92069e-16	7.02672e-23
Auts2	0.00360452	-0.336572	0.532	0.581	1	3.66618e-23	-0.529157	0.388	0.681	7.02953e-19	0.00360452	7.33236e-23
Eef2	3.03525e-11	-0.347301	1	0.932	5.81979e-07	3.95694e-23	-0.282405	1	0.994	7.58703e-19	3.03525e-11	7.91388e-23
Hnrnpu	7.60107e-10	-0.502069	0.894	0.834	1.45743e-05	5.31242e-23	-0.420383	0.883	0.929	1.0186e-18	7.60107e-10	1.06248e-22
Atp2a2	6.56368e-15	0.422959	0.915	0.72	1.25852e-10	5.63674e-23	0.372946	0.893	0.757	1.08079e-18	6.56368e-15	1.12735e-22
Acat2	1.56486e-10	0.302448	0.777	0.497	3.00046e-06	6.49053e-23	0.364687	0.718	0.421	1.24449e-18	1.56486e-10	1.29811e-22
Hoxb8	7.518e-08	-0.381752	0.298	0.568	0.0014415	7.51199e-23	-0.47397	0.345	0.661	1.44035e-18	7.518e-08	1.5024e-22
Cystm1	9.15787e-12	0.295631	0.926	0.662	1.75593e-07	1.15162e-22	0.36294	0.942	0.762	2.20811e-18	9.15787e-12	2.30324e-22
Nono	2.48732e-07	-0.462366	0.734	0.791	0.00476919	1.1716e-22	-0.41098	0.767	0.895	2.24643e-18	2.48732e-07	2.3432e-22
Sdhc	5.90336e-15	0.296665	0.957	0.777	1.13191e-10	1.21851e-22	0.33723	0.922	0.787	2.33638e-18	5.90336e-15	2.43703e-22
Prmt1	2.82195e-10	-0.520104	0.809	0.831	5.41081e-06	1.28553e-22	-0.424791	0.82	0.909	2.46487e-18	2.82195e-10	2.57106e-22
Coq9	3.67475e-11	0.250365	0.83	0.544	7.04596e-07	1.45188e-22	0.322531	0.85	0.58	2.78384e-18	3.67475e-11	2.90376e-22
Ankib1	4.67358e-13	0.31304	0.713	0.412	8.96111e-09	1.53744e-22	0.324974	0.728	0.412	2.94789e-18	4.67358e-13	3.07488e-22
Rufy3	5.63943e-07	0.259294	0.681	0.473	0.010813	1.70522e-22	0.335888	0.723	0.436	3.26958e-18	5.63943e-07	3.41043e-22
Tsc22d1	3.08369e-10	-0.642992	0.798	0.828	5.91266e-06	1.80256e-22	-0.715277	0.718	0.868	3.45622e-18	3.08369e-10	3.60511e-22
Elovl1	2.15806e-15	0.411892	0.84	0.51	4.13786e-11	1.91919e-22	0.31709	0.733	0.435	3.67985e-18	2.15806e-15	3.83837e-22
Mgst3	7.6932e-09	0.303567	0.83	0.598	0.000147509	2.16073e-22	0.344352	0.801	0.551	4.14299e-18	7.6932e-09	4.32147e-22
H3f3b	2.52114e-22	-0.771259	0.979	0.956	4.83403e-18	1.39745e-09	-0.31247	0.99	0.972	2.67947e-05	1.39745e-09	5.04228e-22
Clptm1	2.76234e-15	0.366755	0.904	0.574	5.29651e-11	3.40562e-22	0.327634	0.835	0.602	6.52993e-18	2.76234e-15	6.81123e-22
Gcat	2.96134e-17	0.478017	0.904	0.53	5.67808e-13	4.45359e-22	0.345648	0.825	0.594	8.53932e-18	2.96134e-17	8.90718e-22
Mxd4	0.00370813	-0.258982	0.564	0.615	1	4.49947e-22	-0.389839	0.34	0.658	8.62728e-18	0.00370813	8.99894e-22
Ssbp4	1.303e-14	-0.490885	0.17	0.635	2.49838e-10	5.04041e-22	-0.349082	0.301	0.613	9.66448e-18	1.303e-14	1.00808e-21
Arhgap10	1.25861e-12	0.281327	0.734	0.402	2.41326e-08	5.37021e-22	0.295236	0.636	0.325	1.02968e-17	1.25861e-12	1.07404e-21
Foxc1	1.43679e-07	-0.254079	0.032	0.297	0.0027549	5.50267e-22	-0.488458	0.097	0.454	1.05508e-17	1.43679e-07	1.10053e-21
Pnn	4.75931e-08	-0.490904	0.766	0.801	0.00091255	6.54989e-22	-0.425728	0.689	0.886	1.25588e-17	4.75931e-08	1.30998e-21
Cotl1	6.94516e-22	0.61983	0.989	0.666	1.33166e-17	1.06453e-14	0.293758	0.913	0.787	2.04114e-10	1.06453e-14	1.38903e-21
Aldh1a2	2.62613e-05	-0.459001	0.404	0.557	0.503534	7.47603e-22	-0.798939	0.524	0.725	1.43345e-17	2.62613e-05	1.49521e-21
Anp32a	0.000164843	-0.324209	0.894	0.814	1	7.98089e-22	-0.405496	0.869	0.924	1.53026e-17	0.000164843	1.59618e-21
Hmgn1	2.1089e-12	-0.546864	0.968	0.912	4.04361e-08	7.98134e-22	-0.388251	0.951	0.958	1.53034e-17	2.1089e-12	1.59627e-21
Rpl36a	4.45576e-10	-0.393568	1	0.943	8.54346e-06	1.04877e-21	-0.338233	0.995	0.984	2.01091e-17	4.45576e-10	2.09753e-21
Kcnq1ot1	0.00924397	-0.33515	0.745	0.794	1	1.30801e-21	-0.719356	0.631	0.83	2.50798e-17	0.00924397	2.61603e-21
Eef1g	4.18099e-10	-0.426344	0.968	0.912	8.01663e-06	1.36129e-21	-0.323996	0.995	0.969	2.61013e-17	4.18099e-10	2.72258e-21
L3hypdh	2.72063e-20	0.413254	0.809	0.378	5.21653e-16	1.37757e-21	0.300993	0.597	0.295	2.64136e-17	2.72063e-20	2.75515e-21
Cbx3	9.47113e-07	-0.465254	0.713	0.787	0.0181599	1.48232e-21	-0.383036	0.587	0.818	2.84219e-17	9.47113e-07	2.96463e-21
Fam213a	1.56299e-21	0.436807	0.947	0.571	2.99688e-17	7.14046e-21	0.374378	0.874	0.659	1.36911e-16	7.14046e-21	3.12598e-21
Atp2b1	8.45676e-12	0.388275	0.947	0.794	1.6215e-07	1.5825e-21	0.468891	0.927	0.815	3.03428e-17	8.45676e-12	3.16499e-21
Nfat5	0.000196511	-0.367823	0.383	0.568	1	1.60287e-21	-0.53199	0.374	0.652	3.07335e-17	0.000196511	3.20574e-21
Hmgcl	4.09282e-10	0.252579	0.734	0.446	7.84757e-06	2.14792e-21	0.274535	0.772	0.483	4.11842e-17	4.09282e-10	4.29584e-21
Eif3e	1.50706e-05	-0.328476	0.894	0.784	0.288964	2.17268e-21	-0.361005	0.893	0.924	4.16589e-17	1.50706e-05	4.34536e-21
Stx3	5.56896e-10	0.260941	0.723	0.476	1.06779e-05	2.22713e-21	0.338216	0.743	0.425	4.2703e-17	5.56896e-10	4.45426e-21
Nmrk1	1.22223e-20	0.411294	0.745	0.297	2.34351e-16	2.23384e-21	0.280843	0.612	0.32	4.28316e-17	1.22223e-20	4.46768e-21
Hoxd9	4.01684e-11	-0.467147	0.096	0.466	7.70189e-07	2.3594e-21	-0.385194	0.073	0.416	4.52391e-17	4.01684e-11	4.71879e-21
Ddx39b	6.56199e-10	-0.532423	0.755	0.821	1.2582e-05	2.66584e-21	-0.395297	0.757	0.874	5.11149e-17	6.56199e-10	5.33169e-21
Purb	3.49113e-05	-0.28913	0.745	0.777	0.669389	3.18528e-21	-0.417569	0.68	0.869	6.10745e-17	3.49113e-05	6.37056e-21
Btd	6.1454e-14	0.31353	0.766	0.409	1.17832e-09	3.43124e-21	0.282746	0.67	0.368	6.57905e-17	6.1454e-14	6.86247e-21
Plod2	3.43596e-12	0.264785	0.755	0.412	6.58811e-08	4.82526e-21	0.283455	0.709	0.417	9.25196e-17	3.43596e-12	9.65052e-21
Sub1	1.34363e-08	-0.427834	0.926	0.885	0.000257627	5.69409e-21	-0.37922	0.908	0.955	1.09178e-16	1.34363e-08	1.13882e-20
Dbt	3.10505e-09	0.269093	0.766	0.483	5.95361e-05	6.06115e-21	0.329648	0.752	0.487	1.16216e-16	3.10505e-09	1.21223e-20
Tcf4	1.26372e-07	-0.41595	0.34	0.581	0.00242305	6.23226e-21	-0.372365	0.243	0.571	1.19497e-16	1.26372e-07	1.24645e-20
Acin1	4.37901e-07	-0.358421	0.723	0.753	0.00839631	6.26805e-21	-0.397718	0.704	0.857	1.20184e-16	4.37901e-07	1.25361e-20
Hipk2	0.000686157	-0.422773	0.734	0.726	1	7.23332e-21	-0.716953	0.573	0.765	1.38692e-16	0.000686157	1.44666e-20
Itpr1	1.35856e-13	0.406049	0.851	0.534	2.6049e-09	7.26963e-21	0.379736	0.772	0.486	1.39388e-16	1.35856e-13	1.45393e-20
Chac2	2.33236e-11	0.303028	0.617	0.307	4.47206e-07	8.15765e-21	0.273029	0.689	0.402	1.56415e-16	2.33236e-11	1.63153e-20
Tmbim6	9.26106e-16	0.448217	0.989	0.861	1.77572e-11	1.13725e-20	0.313213	1	0.956	2.18055e-16	9.26106e-16	2.27449e-20
Ecsit	7.8806e-10	0.292473	0.787	0.544	1.51103e-05	1.21554e-20	0.278293	0.748	0.474	2.33068e-16	7.8806e-10	2.43109e-20
2300009A05Rik	2.32528e-11	0.372785	0.787	0.578	4.45848e-07	1.30692e-20	0.362866	0.796	0.57	2.50589e-16	2.32528e-11	2.61384e-20
Magt1	6.54976e-13	0.389551	0.883	0.72	1.25585e-08	1.48603e-20	0.363387	0.883	0.754	2.84931e-16	6.54976e-13	2.97206e-20
Fubp1	1.202e-13	-0.63786	0.681	0.78	2.30472e-09	1.64864e-20	-0.390351	0.597	0.802	3.1611e-16	1.202e-13	3.29727e-20
Maged1	2.22687e-09	-0.498877	0.787	0.821	4.2698e-05	1.79793e-20	-0.405601	0.66	0.849	3.44736e-16	2.22687e-09	3.59587e-20
Luc7l3	2.73728e-05	-0.332855	0.798	0.76	0.524846	1.93423e-20	-0.401129	0.587	0.805	3.70869e-16	2.73728e-05	3.86846e-20
Nt5c2	4.70053e-12	0.369478	0.67	0.358	9.0128e-08	2.77719e-20	0.293968	0.67	0.375	5.32498e-16	4.70053e-12	5.55438e-20
Rps25	8.89258e-06	-0.254342	1	0.922	0.170506	3.08484e-20	-0.354857	0.995	0.977	5.91487e-16	8.89258e-06	6.16968e-20
Slc25a13	4.76456e-16	0.361743	0.819	0.483	9.13557e-12	3.28141e-20	0.337845	0.82	0.577	6.29178e-16	4.76456e-16	6.56282e-20
Bag1	5.64272e-05	-0.313527	0.904	0.818	1	3.91232e-20	-0.39413	0.883	0.918	7.50148e-16	5.64272e-05	7.82464e-20
Pcyt2	1.36917e-11	0.328507	0.777	0.503	2.62524e-07	4.33928e-20	0.28676	0.689	0.406	8.32013e-16	1.36917e-11	8.67855e-20
Rcn1	3.43632e-08	-0.688208	0.511	0.693	0.000658881	4.42432e-20	-0.494848	0.316	0.631	8.48318e-16	3.43632e-08	8.84863e-20
Dusp23	1.19831e-15	0.300979	0.681	0.311	2.29765e-11	4.48651e-20	0.256713	0.665	0.343	8.60243e-16	1.19831e-15	8.97302e-20
Blvra	1.48428e-13	0.382715	0.723	0.412	2.84596e-09	4.99448e-20	0.35373	0.733	0.461	9.57641e-16	1.48428e-13	9.98895e-20
Rab11fip3	5.18158e-20	0.350704	0.734	0.304	9.93516e-16	3.47814e-19	0.330875	0.675	0.378	6.66898e-15	3.47814e-19	1.03632e-19
Ctsa	6.0637e-20	0.495421	0.926	0.551	1.16265e-15	3.30325e-12	0.295034	0.85	0.709	6.33364e-08	3.30325e-12	1.21274e-19
Ctsz	4.80608e-12	0.367404	0.915	0.672	9.21518e-08	6.33674e-20	0.321901	0.883	0.718	1.21501e-15	4.80608e-12	1.26735e-19
Trim28	1.01903e-05	-0.366252	0.723	0.764	0.195388	7.28707e-20	-0.357909	0.563	0.786	1.39722e-15	1.01903e-05	1.45741e-19
Rpl35	2.14537e-07	-0.294688	0.989	0.953	0.00411353	7.94529e-20	-0.288547	0.995	0.988	1.52343e-15	2.14537e-07	1.58906e-19
Stmn1	9.45553e-15	-1.33007	0.596	0.78	1.813e-10	7.97959e-20	-0.749648	0.456	0.704	1.53001e-15	9.45553e-15	1.59592e-19
Snrpf	4.44329e-10	-0.557841	0.787	0.791	8.51956e-06	8.00892e-20	-0.410954	0.748	0.862	1.53563e-15	4.44329e-10	1.60178e-19
Mpp1	9.3559e-16	0.366082	0.723	0.334	1.7939e-11	8.36394e-20	0.284745	0.592	0.311	1.6037e-15	9.3559e-16	1.67279e-19
Nop10	5.15302e-09	0.265237	0.936	0.818	9.8804e-05	9.68371e-20	0.32526	0.976	0.875	1.85675e-15	5.15302e-09	1.93674e-19
Selenoh	1.21039e-05	-0.516937	0.713	0.736	0.232081	1.06325e-19	-0.432808	0.665	0.813	2.03868e-15	1.21039e-05	2.12651e-19
Smim4	3.10568e-10	0.253226	0.872	0.655	5.95483e-06	1.08673e-19	0.291291	0.835	0.577	2.0837e-15	3.10568e-10	2.17346e-19
Epha7	0.000628129	-0.286253	0.191	0.348	1	1.0946e-19	-0.381558	0.131	0.455	2.09879e-15	0.000628129	2.1892e-19
Snx6	3.7331e-16	0.352944	0.947	0.764	7.15785e-12	1.13906e-19	0.28664	0.951	0.842	2.18403e-15	3.7331e-16	2.27811e-19
Srrm2	3.03786e-06	-0.328157	0.947	0.858	0.0582479	1.14989e-19	-0.325507	0.888	0.938	2.2048e-15	3.03786e-06	2.29978e-19
Tead2	1.96192e-08	-0.444116	0.16	0.463	0.000376178	1.25413e-19	-0.360229	0.16	0.48	2.40467e-15	1.96192e-08	2.50826e-19
Ssbp2	1.15281e-08	-0.323115	0.245	0.547	0.000221039	1.28417e-19	-0.390359	0.257	0.563	2.46226e-15	1.15281e-08	2.56833e-19
Siva1	7.57817e-11	-0.694249	0.596	0.747	1.45304e-06	1.29762e-19	-0.403282	0.515	0.734	2.48806e-15	7.57817e-11	2.59524e-19
Bzw2	7.62391e-10	-0.541598	0.553	0.743	1.46181e-05	1.50619e-19	-0.429283	0.607	0.788	2.88797e-15	7.62391e-10	3.01238e-19
Srsf3	2.46668e-10	-0.541337	0.872	0.868	4.72961e-06	1.56093e-19	-0.413223	0.85	0.92	2.99293e-15	2.46668e-10	3.12186e-19
Basp1	1.11951e-07	-0.742554	0.138	0.446	0.00214655	1.69456e-19	-0.763103	0.112	0.436	3.24914e-15	1.11951e-07	3.38911e-19
Jund	2.02978e-05	-0.497123	0.936	0.834	0.38919	2.09348e-19	-0.500846	0.961	0.95	4.01404e-15	2.02978e-05	4.18696e-19
Bnip3l	5.81527e-10	-0.509435	0.67	0.77	1.11502e-05	2.18034e-19	-0.377673	0.816	0.906	4.18058e-15	5.81527e-10	4.36067e-19
Hoxb7	0.0103916	-0.271667	0.5	0.574	1	2.27847e-19	-0.389599	0.461	0.714	4.36873e-15	0.0103916	4.55693e-19
Atp11a	0.00896977	0.264432	0.479	0.402	1	2.47038e-19	0.513512	0.694	0.413	4.73671e-15	0.00896977	4.94077e-19
Ier5l	4.28698e-06	-0.283437	0.191	0.432	0.0821986	2.47899e-19	-0.482418	0.189	0.502	4.75322e-15	4.28698e-06	4.95798e-19
Pafah1b3	2.08514e-05	-0.400302	0.766	0.757	0.399804	3.08265e-19	-0.414496	0.665	0.846	5.91067e-15	2.08514e-05	6.16529e-19
Fscn1	2.60248e-08	-0.348131	0.181	0.49	0.000499	4.1858e-19	-0.316588	0.083	0.405	8.02586e-15	2.60248e-08	8.37161e-19
Tmem165	2.84431e-05	-0.298454	0.521	0.703	0.545368	5.66674e-19	-0.315819	0.466	0.716	1.08654e-14	2.84431e-05	1.13335e-18
Msi2	0.000236134	-0.369845	0.553	0.676	1	5.72133e-19	-0.377638	0.612	0.816	1.09701e-14	0.000236134	1.14427e-18
Ubtf	0.000283606	-0.256708	0.617	0.676	1	5.76689e-19	-0.360188	0.539	0.757	1.10574e-14	0.000283606	1.15338e-18
Derl1	1.13254e-09	0.270227	0.766	0.524	2.17154e-05	6.77232e-19	0.276696	0.801	0.573	1.29852e-14	1.13254e-09	1.35446e-18
Jag1	3.52772e-10	-0.431257	0.106	0.446	6.76405e-06	7.27653e-19	-0.489212	0.155	0.455	1.3952e-14	3.52772e-10	1.45531e-18
Anks4b	5.35577e-14	0.332597	0.766	0.338	1.02691e-09	9.25428e-19	0.270555	0.777	0.392	1.77442e-14	5.35577e-14	1.85086e-18
Map1lc3a	0.000357272	-0.298212	0.681	0.723	1	9.44485e-19	-0.448517	0.621	0.81	1.81096e-14	0.000357272	1.88897e-18
Ktn1	6.60035e-09	-0.509225	0.66	0.77	0.000126555	1.13514e-18	-0.414002	0.617	0.802	2.17651e-14	6.60035e-09	2.27027e-18
Hnrnpr	2.3536e-06	-0.408445	0.66	0.753	0.045128	1.14186e-18	-0.348833	0.723	0.854	2.18941e-14	2.3536e-06	2.28373e-18
Bex3	0.000107233	-0.293308	0.904	0.818	1	1.27158e-18	-0.376297	0.869	0.933	2.43813e-14	0.000107233	2.54317e-18
Rpl12	2.54871e-12	-0.482963	1	0.953	4.88689e-08	1.52465e-18	-0.33993	1	0.995	2.92336e-14	2.54871e-12	3.0493e-18
Pax2	0.000123241	-0.428056	0.351	0.507	1	1.55941e-18	-0.416783	0.228	0.532	2.99002e-14	0.000123241	3.11883e-18
Sumo1	5.30437e-06	-0.424127	0.787	0.811	0.101706	1.88996e-18	-0.347877	0.806	0.884	3.62381e-14	5.30437e-06	3.77992e-18
Wfdc2	1.9159e-18	-2.01251	0.266	0.713	3.67355e-14	3.99259e-06	-1.46146	0.311	0.416	0.0765539	3.99259e-06	3.83181e-18
D10Jhu81e	4.24123e-11	0.298543	0.872	0.639	8.13214e-07	2.05944e-18	0.282907	0.835	0.618	3.94877e-14	4.24123e-11	4.11888e-18
Ccdc107	3.95847e-16	0.405387	0.904	0.628	7.58996e-12	2.0913e-18	0.355063	0.825	0.664	4.00985e-14	3.95847e-16	4.18259e-18
Id1	3.19865e-08	-0.973977	0.277	0.524	0.00061331	2.40001e-18	-1.06889	0.427	0.638	4.60178e-14	3.19865e-08	4.80002e-18
Lpcat3	7.54244e-17	0.447751	0.915	0.642	1.44619e-12	2.90599e-18	0.301012	0.888	0.763	5.57195e-14	7.54244e-17	5.81199e-18
Ywhaq	9.09427e-11	-0.529722	0.883	0.838	1.74374e-06	2.95493e-18	-0.390786	0.908	0.926	5.66578e-14	9.09427e-11	5.90985e-18
Zfhx3	6.03256e-08	-0.354063	0.213	0.497	0.00115668	3.20797e-18	-0.300427	0.117	0.417	6.15095e-14	6.03256e-08	6.41593e-18
Pbx1	0.00154531	-0.315286	0.511	0.628	1	3.42973e-18	-0.379793	0.374	0.666	6.57617e-14	0.00154531	6.85947e-18
1700011H14Rik	4.03519e-18	0.433852	0.968	0.622	7.73707e-14	0.000375883	-0.260103	0.883	0.825	1	0.000375883	8.07037e-18
Hdac1	0.000124359	-0.318013	0.638	0.713	1	4.07738e-18	-0.344865	0.442	0.695	7.81797e-14	0.000124359	8.15476e-18
Pgm3	2.70477e-10	0.298962	0.723	0.419	5.18613e-06	6.20852e-18	0.275296	0.723	0.481	1.19042e-13	2.70477e-10	1.2417e-17
Sox11	4.22811e-13	-0.680529	0.17	0.568	8.10697e-09	8.81148e-18	-0.549265	0.155	0.453	1.68951e-13	4.22811e-13	1.7623e-17
Polr2m	0.00206742	-0.277357	0.894	0.797	1	1.18799e-17	-0.315125	0.893	0.916	2.27784e-13	0.00206742	2.37597e-17
Efhd1	7.0772e-07	-0.328972	0.032	0.27	0.0135698	1.33484e-17	-0.401615	0.049	0.345	2.55942e-13	7.0772e-07	2.66968e-17
Hist1h2ap	2.99894e-06	-0.734887	0.426	0.622	0.0575017	1.40526e-17	-0.336729	0.199	0.501	2.69445e-13	2.99894e-06	2.81053e-17
Rpl41	8.90638e-13	-0.47883	1	0.983	1.70771e-08	1.62123e-17	-0.26763	1	0.997	3.10855e-13	8.90638e-13	3.24247e-17
Gas1	1.33123e-07	-0.325905	0.181	0.453	0.0025525	1.90609e-17	-0.416577	0.262	0.546	3.65473e-13	1.33123e-07	3.81218e-17
Hmgn2	1.50281e-11	-0.780161	0.734	0.784	2.88148e-07	2.19493e-17	-0.426474	0.626	0.82	4.20856e-13	1.50281e-11	4.38986e-17
Lars2	1.46855e-15	0.404914	0.915	0.726	2.81579e-11	2.71662e-17	0.428981	0.84	0.696	5.20884e-13	1.46855e-15	5.43323e-17
Paip2	6.08975e-06	-0.340591	0.809	0.787	0.116765	2.73188e-17	-0.321074	0.825	0.892	5.23812e-13	6.08975e-06	5.46377e-17
Tra2a	1.88802e-10	-0.499418	0.681	0.76	3.6201e-06	3.15839e-17	-0.35792	0.636	0.837	6.0559e-13	1.88802e-10	6.31679e-17
Arl4c	8.38929e-09	-0.41773	0.266	0.591	0.000160856	3.29117e-17	-0.548526	0.272	0.563	6.31049e-13	8.38929e-09	6.58234e-17
Acaa2	0.00493358	-0.517084	0.681	0.703	1	3.74868e-17	-0.479461	0.461	0.718	7.18773e-13	0.00493358	7.49737e-17
mt-Nd1	3.92072e-17	0.622866	1	0.959	7.51758e-13	1.29645e-16	0.396574	0.995	0.991	2.48581e-12	1.29645e-16	7.84144e-17
Spint2	0.000319981	-0.373397	0.872	0.831	1	4.11567e-17	-0.41314	0.859	0.902	7.89139e-13	0.000319981	8.23134e-17
H1fx	4.42337e-17	-0.927555	0.245	0.686	8.48136e-13	5.14969e-14	-0.38098	0.243	0.511	9.87402e-10	5.14969e-14	8.84673e-17
Hnrnpa3	1.78764e-06	-0.420349	0.957	0.868	0.0342762	4.73597e-17	-0.355579	0.869	0.931	9.08076e-13	1.78764e-06	9.47195e-17
Arl2	1.41629e-08	0.274297	0.787	0.574	0.000271559	4.90703e-17	0.276153	0.854	0.658	9.40873e-13	1.41629e-08	9.81405e-17
Cdh6	0.0135559	-0.531217	0.691	0.608	1	5.7212e-17	-0.588964	0.583	0.726	1.09698e-12	0.0135559	1.14424e-16
Gns	2.04805e-16	0.377612	0.777	0.402	3.92693e-12	6.48814e-17	0.261083	0.65	0.378	1.24404e-12	2.04805e-16	1.29763e-16
Hmgb2	7.91881e-17	-1.25333	0.617	0.821	1.51835e-12	8.46494e-09	-0.405679	0.723	0.818	0.000162307	8.46494e-09	1.58376e-16
Calm3	2.92488e-16	0.399715	0.989	0.801	5.60816e-12	8.34721e-17	0.256563	0.971	0.92	1.60049e-12	2.92488e-16	1.66944e-16
Ezh2	2.26359e-06	-0.312531	0.34	0.557	0.043402	8.70071e-17	-0.294579	0.286	0.566	1.66827e-12	2.26359e-06	1.74014e-16
Smarca5	6.02477e-09	-0.565046	0.649	0.757	0.000115519	9.31154e-17	-0.351783	0.689	0.837	1.78539e-12	6.02477e-09	1.86231e-16
Ccdc88a	1.97784e-06	-0.316548	0.234	0.497	0.037923	9.48029e-17	-0.315176	0.15	0.438	1.81775e-12	1.97784e-06	1.89606e-16
Tpcn1	1.61936e-14	0.32076	0.745	0.409	3.10496e-10	1.02064e-16	0.288417	0.714	0.442	1.95697e-12	1.61936e-14	2.04128e-16
C1qtnf12	1.17566e-14	0.412582	0.894	0.53	2.25422e-10	1.06621e-16	0.292465	0.733	0.494	2.04435e-12	1.17566e-14	2.13242e-16
Nceh1	1.3632e-16	0.418202	0.862	0.49	2.6138e-12	1.48867e-14	0.279287	0.898	0.669	2.85437e-10	1.48867e-14	2.7264e-16
Kmt2e	0.00487671	-0.261049	0.691	0.699	1	1.40237e-16	-0.333851	0.568	0.773	2.68891e-12	0.00487671	2.80475e-16
Ptov1	1.2905e-08	-0.435161	0.915	0.858	0.000247441	1.68552e-16	-0.347137	0.835	0.918	3.23182e-12	1.2905e-08	3.37104e-16
Pdgfa	2.12343e-09	-0.690025	0.383	0.642	4.07146e-05	2.58497e-16	-0.864157	0.408	0.655	4.95643e-12	2.12343e-09	5.16995e-16
Lrrc58	2.70926e-16	0.371017	0.862	0.574	5.19474e-12	1.67397e-13	0.253228	0.762	0.59	3.20967e-09	1.67397e-13	5.41853e-16
Cks1b	6.67053e-06	-0.347625	0.383	0.595	0.127901	2.94928e-16	-0.31124	0.33	0.599	5.65494e-12	6.67053e-06	5.89855e-16
Slc25a1	2.17095e-11	0.345121	0.787	0.564	4.16258e-07	3.01263e-16	0.28574	0.801	0.595	5.77642e-12	2.17095e-11	6.02526e-16
Dusp9	1.74342e-08	-0.645643	0.074	0.372	0.000334284	3.17997e-16	-0.519921	0.044	0.316	6.09728e-12	1.74342e-08	6.35994e-16
Eif3m	6.88324e-08	-0.451954	0.894	0.845	0.00131979	3.25648e-16	-0.322432	0.859	0.91	6.24398e-12	6.88324e-08	6.51297e-16
Arid4b	0.00168746	-0.275578	0.628	0.682	1	3.39817e-16	-0.319894	0.578	0.765	6.51565e-12	0.00168746	6.79634e-16
Sf3a3	3.50697e-07	-0.275913	0.404	0.645	0.00672426	3.77752e-16	-0.271908	0.383	0.651	7.24303e-12	3.50697e-07	7.55505e-16
Mettl26	2.88492e-11	0.32983	0.926	0.733	5.53155e-07	3.8007e-16	0.26384	0.903	0.808	7.28747e-12	2.88492e-11	7.60141e-16
Sf3b1	2.22384e-07	-0.354363	0.84	0.787	0.00426399	4.30445e-16	-0.313234	0.83	0.898	8.25335e-12	2.22384e-07	8.60889e-16
Irf2bpl	4.47233e-05	-0.282736	0.319	0.527	0.857525	4.93569e-16	-0.331317	0.345	0.602	9.46369e-12	4.47233e-05	9.87137e-16
Ehd1	2.21575e-13	0.288253	0.894	0.605	4.24847e-09	5.28727e-16	0.289017	0.859	0.621	1.01378e-11	2.21575e-13	1.05745e-15
Hadh	2.14578e-10	0.258939	0.989	0.753	4.11431e-06	5.46057e-16	0.263849	0.947	0.843	1.04701e-11	2.14578e-10	1.09211e-15
H2afy	1.2412e-10	-0.485774	0.872	0.818	2.37987e-06	7.21091e-16	-0.321193	0.83	0.896	1.38262e-11	1.2412e-10	1.44218e-15
Supt4a	8.76365e-06	-0.322098	0.66	0.73	0.168034	8.45825e-16	-0.313402	0.65	0.8	1.62178e-11	8.76365e-06	1.69165e-15
Srsf9	1.84645e-06	-0.327702	0.67	0.736	0.0354039	1.32839e-15	-0.306404	0.718	0.86	2.54706e-11	1.84645e-06	2.65678e-15
Slco1a6	1.29609e-07	0.402	0.34	0.125	0.00248512	1.47098e-15	0.424328	0.335	0.125	2.82046e-11	1.29609e-07	2.94196e-15
Ten1	0.000154324	-0.281728	0.511	0.639	1	1.73826e-15	-0.294642	0.427	0.676	3.33294e-11	0.000154324	3.47652e-15
Aimp1	5.62923e-06	-0.408177	0.777	0.787	0.107935	1.82871e-15	-0.268282	0.791	0.89	3.50637e-11	5.62923e-06	3.65742e-15
Ntm	2.75183e-05	-0.252958	0.138	0.358	0.527637	1.9127e-15	-0.338532	0.117	0.403	3.66742e-11	2.75183e-05	3.82541e-15
Brd3	7.29055e-05	-0.304701	0.543	0.669	1	2.05741e-15	-0.279531	0.359	0.618	3.94489e-11	7.29055e-05	4.11483e-15
Csnk1e	2.33048e-15	-0.417975	0.16	0.618	4.46846e-11	9.25242e-15	-0.296919	0.282	0.525	1.77406e-10	9.25242e-15	4.66096e-15
Myef2	5.52116e-08	-0.43036	0.202	0.493	0.00105863	2.53599e-15	-0.300643	0.194	0.467	4.86251e-11	5.52116e-08	5.07198e-15
Hdgf	0.0016824	-0.254825	0.894	0.804	1	2.55785e-15	-0.312694	0.888	0.914	4.90443e-11	0.0016824	5.11571e-15
Sh3bgrl	3.75785e-05	-0.258547	0.245	0.473	0.72053	2.87391e-15	-0.284968	0.165	0.447	5.51044e-11	3.75785e-05	5.74782e-15
Ssb	1.34878e-05	-0.33091	0.968	0.824	0.258615	2.88763e-15	-0.293488	0.883	0.927	5.53674e-11	1.34878e-05	5.77526e-15
Sdc4	0.00226766	-0.396217	0.84	0.757	1	3.28836e-15	-0.47026	0.874	0.883	6.30509e-11	0.00226766	6.57671e-15
Slc38a1	9.00894e-10	-0.37118	0.202	0.537	1.72737e-05	3.41557e-15	-0.2889	0.214	0.462	6.54901e-11	9.00894e-10	6.83114e-15
Fus	2.146e-07	-0.403741	0.872	0.787	0.00411475	3.52703e-15	-0.346129	0.825	0.887	6.76274e-11	2.146e-07	7.05407e-15
Foxp1	0.00148076	-0.251608	0.447	0.547	1	3.7695e-15	-0.345198	0.408	0.649	7.22763e-11	0.00148076	7.539e-15
Son	3.48921e-05	-0.303585	0.894	0.861	0.66902	4.74124e-15	-0.27156	0.888	0.931	9.09085e-11	3.48921e-05	9.48248e-15
Bclaf1	0.000958081	-0.264051	0.766	0.743	1	4.96819e-15	-0.334588	0.675	0.83	9.52602e-11	0.000958081	9.93639e-15
Palm3	7.12091e-09	0.264416	0.809	0.547	0.000136536	6.08601e-15	0.267093	0.66	0.387	1.16693e-10	7.12091e-09	1.2172e-14
Ctcf	8.66688e-08	-0.386491	0.532	0.713	0.00166179	7.10904e-15	-0.278719	0.49	0.74	1.36309e-10	8.66688e-08	1.42181e-14
H2afz	9.65058e-13	-0.946109	0.968	0.922	1.8504e-08	8.29164e-15	-0.539399	0.903	0.946	1.58984e-10	9.65058e-13	1.65833e-14
Smc3	1.14975e-08	-0.421765	0.691	0.77	0.000220453	8.40978e-15	-0.333193	0.617	0.812	1.61249e-10	1.14975e-08	1.68196e-14
Hoxb9	4.96183e-07	-0.308525	0.298	0.544	0.00951382	8.95066e-15	-0.33741	0.325	0.56	1.7162e-10	4.96183e-07	1.79013e-14
Nop53	0.00411712	-0.290319	0.723	0.74	1	9.38511e-15	-0.287423	0.699	0.835	1.7995e-10	0.00411712	1.87702e-14
mt-Nd2	9.55274e-15	0.50247	1	0.983	1.83164e-10	6.17344e-10	0.256346	1	0.995	1.1837e-05	6.17344e-10	1.91055e-14
Itga6	0.11981	-0.296652	0.787	0.689	1	1.72311e-14	-0.519318	0.621	0.743	3.30389e-10	0.11981	3.44622e-14
Notch1	0.000564875	-0.273047	0.255	0.439	1	2.10733e-14	-0.255516	0.146	0.415	4.04059e-10	0.000564875	4.21465e-14
Sf3b2	0.000191759	-0.278717	0.883	0.794	1	2.11495e-14	-0.289374	0.806	0.904	4.05521e-10	0.000191759	4.2299e-14
Retreg1	1.82473e-09	0.308605	0.862	0.628	3.49874e-05	2.23146e-14	0.260531	0.927	0.775	4.2786e-10	1.82473e-09	4.46292e-14
Ppig	0.000134025	-0.327203	0.809	0.791	1	2.2862e-14	-0.305751	0.767	0.887	4.38356e-10	0.000134025	4.5724e-14
Srsf6	0.0014284	-0.270466	0.713	0.747	1	2.35385e-14	-0.296913	0.689	0.806	4.51328e-10	0.0014284	4.70771e-14
Eif4a1	5.98849e-09	-0.408444	0.979	0.905	0.000114823	2.4624e-14	-0.267283	0.985	0.966	4.7214e-10	5.98849e-09	4.9248e-14
Bex1	1.77944e-08	-0.466033	0.298	0.591	0.000341189	3.09837e-14	-0.355	0.209	0.48	5.94081e-10	1.77944e-08	6.19674e-14
Cd81	2.01368e-05	-0.410676	0.819	0.807	0.386102	4.4423e-14	-0.336058	0.811	0.892	8.51766e-10	2.01368e-05	8.88459e-14
Egr1	6.0729e-05	-0.526357	0.404	0.571	1	6.1498e-14	-0.609993	0.456	0.652	1.17916e-09	6.0729e-05	1.22996e-13
Timp2	1.03223e-07	-0.388272	0.223	0.517	0.0019792	6.63314e-14	-0.252883	0.146	0.406	1.27184e-09	1.03223e-07	1.32663e-13
S100a11	0.261637	-0.431392	0.862	0.703	1	6.63503e-14	-0.549259	0.675	0.803	1.2722e-09	0.261637	1.32701e-13
Rrp1	0.00325386	-0.25106	0.851	0.791	1	8.31628e-14	-0.278989	0.825	0.912	1.59456e-09	0.00325386	1.66326e-13
Cthrc1	0.000365809	-0.324779	0.213	0.412	1	9.06686e-14	-0.482156	0.209	0.477	1.73848e-09	0.000365809	1.81337e-13
Pantr1	0.00291555	-0.41298	0.33	0.453	1	1.06443e-13	-0.509479	0.417	0.64	2.04094e-09	0.00291555	2.12886e-13
Hnrnpm	8.10238e-06	-0.404235	0.872	0.794	0.155355	1.27045e-13	-0.326476	0.82	0.866	2.43595e-09	8.10238e-06	2.54089e-13
Clu	0.0104263	-0.733003	0.83	0.693	1	1.30187e-13	-0.691499	0.689	0.75	2.49621e-09	0.0104263	2.60374e-13
Zc3h13	0.00371783	-0.290347	0.638	0.693	1	1.35234e-13	-0.325905	0.563	0.761	2.59299e-09	0.00371783	2.70469e-13
Hoxd8	2.93756e-08	-0.622001	0.16	0.443	0.000563248	1.36684e-13	-0.399962	0.165	0.413	2.62079e-09	2.93756e-08	2.73369e-13
Isyna1	5.01763e-08	-0.421722	0.34	0.591	0.000962081	1.39095e-13	-0.321163	0.417	0.623	2.66701e-09	5.01763e-08	2.78191e-13
Kif3a	6.5766e-05	-0.305111	0.383	0.578	1	1.41159e-13	-0.254585	0.388	0.627	2.70659e-09	6.5766e-05	2.82319e-13
Cd2ap	0.00610133	-0.259475	0.702	0.703	1	1.44743e-13	-0.364551	0.65	0.791	2.7753e-09	0.00610133	2.89485e-13
Frmd4a	3.61587e-09	-0.33457	0.138	0.47	6.93306e-05	1.44821e-13	-0.340321	0.131	0.371	2.7768e-09	3.61587e-09	2.89642e-13
Cnot6l	0.0232165	-0.276477	0.617	0.696	1	1.65515e-13	-0.479045	0.655	0.801	3.17358e-09	0.0232165	3.31029e-13
mt-Co2	1.99114e-12	0.414138	1	0.983	3.81781e-08	1.82618e-13	0.281043	1	0.993	3.50151e-09	1.99114e-12	3.65235e-13
Lmnb1	1.90703e-10	-0.52778	0.255	0.581	3.65654e-06	1.82959e-13	-0.259659	0.282	0.524	3.50806e-09	1.90703e-10	3.65919e-13
Crip2	2.09409e-13	-0.612789	0.149	0.571	4.01521e-09	2.23207e-09	-0.33091	0.141	0.331	4.27978e-05	2.23207e-09	4.18818e-13
Tufm	1.94576e-09	0.252102	0.83	0.635	3.73079e-05	2.76672e-13	0.254944	0.767	0.597	5.3049e-09	1.94576e-09	5.53343e-13
Selenow	5.19024e-05	-0.280662	0.936	0.872	0.995177	2.7698e-13	-0.298063	0.883	0.925	5.31081e-09	5.19024e-05	5.5396e-13
Rbmxl1	6.824e-06	-0.306304	0.447	0.649	0.130843	2.95273e-13	-0.280205	0.451	0.642	5.66156e-09	6.824e-06	5.90546e-13
Wfdc15b	0.00129806	-0.579659	0.138	0.277	1	3.04949e-13	-0.688499	0.044	0.274	5.84709e-09	0.00129806	6.09897e-13
Csnk1a1	1.96177e-06	-0.338543	0.926	0.834	0.0376149	3.10236e-13	-0.293063	0.835	0.928	5.94847e-09	1.96177e-06	6.20472e-13
Rbbp4	1.49717e-07	-0.474757	0.606	0.747	0.00287068	3.17762e-13	-0.303352	0.65	0.78	6.09278e-09	1.49717e-07	6.35525e-13
Nt5dc2	1.07436e-06	-0.368276	0.585	0.726	0.0205999	3.55836e-13	-0.296298	0.5	0.698	6.8228e-09	1.07436e-06	7.11672e-13
Calm2	2.89358e-08	-0.479626	0.926	0.834	0.000554814	3.74651e-13	-0.329157	0.879	0.924	7.18356e-09	2.89358e-08	7.49303e-13
Nrp1	9.30695e-08	-0.260353	0.085	0.375	0.00178451	3.95188e-13	-0.269586	0.049	0.288	7.57733e-09	9.30695e-08	7.90376e-13
Srrm1	0.00106134	-0.267568	0.734	0.764	1	4.62724e-13	-0.297899	0.738	0.871	8.87227e-09	0.00106134	9.25448e-13
Fos	8.08726e-06	-0.611953	0.255	0.486	0.155065	4.6685e-13	-0.853704	0.325	0.551	8.95138e-09	8.08726e-06	9.33699e-13
Polr2a	5.3471e-05	-0.312294	0.511	0.628	1	6.27341e-13	-0.252128	0.417	0.632	1.20286e-08	5.3471e-05	1.25468e-12
Eif4b	0.000178479	-0.272928	0.83	0.77	1	7.08619e-13	-0.282438	0.84	0.902	1.35871e-08	0.000178479	1.41724e-12
Maged2	1.16918e-05	-0.494753	0.766	0.777	0.224178	8.99956e-13	-0.338093	0.655	0.768	1.72557e-08	1.16918e-05	1.79991e-12
Abcd4	9.72846e-13	0.304096	0.681	0.378	1.86534e-08	1.47446e-12	0.279849	0.529	0.311	2.82713e-08	1.47446e-12	1.94569e-12
Cdk4	4.10197e-07	-0.504805	0.851	0.814	0.00786512	1.10047e-12	-0.319179	0.874	0.91	2.11003e-08	4.10197e-07	2.20093e-12
mt-Atp6	6.50598e-12	0.340514	1	0.997	1.24746e-07	1.16423e-12	0.279979	1	1	2.2323e-08	6.50598e-12	2.32847e-12
Rp9	0.000161773	-0.273616	0.681	0.74	1	1.21698e-12	-0.265583	0.689	0.82	2.33343e-08	0.000161773	2.43396e-12
Nfe2l1	0.000394615	-0.260655	0.585	0.696	1	1.22094e-12	-0.346049	0.665	0.791	2.34104e-08	0.000394615	2.44189e-12
Top2b	1.36288e-06	-0.358384	0.5	0.672	0.0261319	1.24586e-12	-0.317925	0.505	0.676	2.38881e-08	1.36288e-06	2.49172e-12
Btg2	1.28543e-05	-0.490457	0.255	0.483	0.246469	1.35124e-12	-0.803866	0.471	0.642	2.59087e-08	1.28543e-05	2.70249e-12
Prss23	2.60475e-07	-0.390893	0.17	0.456	0.00499435	1.47347e-12	-0.405193	0.131	0.361	2.82524e-08	2.60475e-07	2.94695e-12
Rock1	0.00867511	-0.277163	0.617	0.693	1	1.52373e-12	-0.274956	0.626	0.778	2.9216e-08	0.00867511	3.04746e-12
Eid1	0.0276239	-0.2621	0.787	0.736	1	1.59983e-12	-0.320914	0.699	0.832	3.06752e-08	0.0276239	3.19966e-12
Ndn	1.10161e-07	-0.348429	0.191	0.483	0.00211223	1.63788e-12	-0.264313	0.18	0.424	3.14046e-08	1.10161e-07	3.27575e-12
Trp53	0.000372476	-0.271397	0.511	0.615	1	2.00515e-12	-0.277224	0.515	0.702	3.84468e-08	0.000372476	4.01031e-12
Svbp	0.00428897	-0.296807	0.734	0.726	1	2.00922e-12	-0.273281	0.602	0.778	3.85249e-08	0.00428897	4.01845e-12
Smarce1	6.6168e-08	-0.453127	0.628	0.73	0.0012687	2.05296e-12	-0.311717	0.641	0.782	3.93634e-08	6.6168e-08	4.10592e-12
Irx2	7.96798e-07	-0.344878	0.011	0.236	0.0152778	2.08102e-12	-0.389388	0.044	0.265	3.99015e-08	7.96798e-07	4.16205e-12
Tmem213	2.06412e-08	-1.29963	0.053	0.338	0.000395774	2.57094e-12	-1.0646	0.029	0.243	4.92953e-08	2.06412e-08	5.14189e-12
Epcam	4.95217e-07	-0.758352	0.809	0.818	0.0094953	3.31837e-12	-0.516607	0.917	0.85	6.36265e-08	4.95217e-07	6.63675e-12
Hnrnph3	5.47447e-07	-0.393423	0.426	0.628	0.0104967	3.43173e-12	-0.263026	0.413	0.645	6.57999e-08	5.47447e-07	6.86345e-12
Hoxd11	1.22642e-06	-0.401122	0.128	0.385	0.0235154	5.32939e-12	-0.305436	0.073	0.297	1.02186e-07	1.22642e-06	1.06588e-11
Tox3	8.51824e-09	-0.313657	0.032	0.328	0.000163329	6.69275e-12	-0.278257	0.01	0.21	1.28327e-07	8.51824e-09	1.33855e-11
Selenos	3.69037e-08	0.281846	0.915	0.733	0.000707592	7.78284e-12	0.256483	0.85	0.778	1.49228e-07	3.69037e-08	1.55657e-11
Mal	8.46572e-12	-1.46579	0.021	0.395	1.62322e-07	4.15972e-10	-1.00526	0.063	0.25	7.97584e-06	4.15972e-10	1.69314e-11
Nasp	7.55882e-06	-0.552225	0.67	0.733	0.144933	9.55277e-12	-0.303991	0.515	0.719	1.83165e-07	7.55882e-06	1.91055e-11
Macf1	0.0134474	-0.257568	0.585	0.672	1	1.23484e-11	-0.279231	0.578	0.723	2.36769e-07	0.0134474	2.46969e-11
Supt16	4.27809e-05	-0.447997	0.574	0.699	0.820281	1.30149e-11	-0.273107	0.524	0.716	2.49547e-07	4.27809e-05	2.60297e-11
Mecom	1.57124e-09	-0.757251	0.064	0.389	3.01269e-05	1.55398e-11	-0.599713	0.112	0.331	2.97961e-07	1.57124e-09	3.10797e-11
Tpr	9.67212e-06	-0.35328	0.872	0.814	0.185453	1.67077e-11	-0.262501	0.869	0.913	3.20353e-07	9.67212e-06	3.34154e-11
Bod1l	4.54185e-05	-0.322467	0.596	0.72	0.870855	2.38869e-11	-0.276682	0.66	0.803	4.58007e-07	4.54185e-05	4.77738e-11
Magoh	0.000325697	-0.325021	0.67	0.72	1	2.70542e-11	-0.257104	0.631	0.793	5.18736e-07	0.000325697	5.41083e-11
Gm266	9.09773e-07	-0.638936	0.33	0.534	0.017444	5.29473e-11	-0.470544	0.296	0.504	1.01521e-06	9.09773e-07	1.05895e-10
Tfap2b	2.57095e-06	-0.69025	0.043	0.264	0.0492954	7.60317e-11	-0.521433	0.019	0.208	1.45783e-06	2.57095e-06	1.52063e-10
Snrpd3	0.00246125	-0.288718	0.83	0.797	1	7.72865e-11	-0.265296	0.786	0.871	1.48189e-06	0.00246125	1.54573e-10
Prrc2c	0.000597619	-0.277176	0.894	0.831	1	9.2728e-11	-0.346747	0.854	0.913	1.77797e-06	0.000597619	1.85456e-10
Emb	1.09571e-10	-0.51155	0.032	0.382	2.10092e-06	6.04426e-09	-0.442566	0.136	0.319	0.000115893	6.04426e-09	2.19142e-10
Pbrm1	0.00423959	-0.308502	0.702	0.716	1	1.12225e-10	-0.267511	0.626	0.761	2.1518e-06	0.00423959	2.2445e-10
Jpt1	1.7521e-05	-0.421987	0.681	0.716	0.335947	1.23349e-10	-0.317443	0.65	0.79	2.36509e-06	1.7521e-05	2.46698e-10
Lgals3	5.87918e-08	-0.680757	0.064	0.341	0.00112727	1.41364e-10	-0.53942	0.107	0.308	2.71052e-06	5.87918e-08	2.82728e-10
Uncx	3.33564e-06	-0.478418	0.074	0.307	0.0639576	1.51098e-10	-0.50082	0.073	0.277	2.89715e-06	3.33564e-06	3.02196e-10
Snw1	5.34866e-05	-0.323772	0.734	0.747	1	1.58983e-10	-0.251023	0.748	0.864	3.04834e-06	5.34866e-05	3.17966e-10
Lhx1	0.000161851	-0.477464	0.298	0.476	1	1.77624e-10	-0.499194	0.272	0.475	3.40576e-06	0.000161851	3.55247e-10
Abhd14a	1.70287e-06	0.253424	0.745	0.557	0.0326508	2.06848e-10	-0.357287	0.602	0.731	3.9661e-06	1.70287e-06	4.13695e-10
Tmsb10	2.44266e-10	-0.724648	0.947	0.899	4.68356e-06	1.01797e-07	-0.364089	0.971	0.942	0.00195185	1.01797e-07	4.88532e-10
Kcnk1	2.87118e-10	-0.335544	0.021	0.355	5.5052e-06	2.64646e-10	-0.262393	0.068	0.264	5.07433e-06	2.87118e-10	5.29293e-10
Impdh2	0.000377025	-0.296023	0.691	0.713	1	4.47697e-10	-0.293175	0.67	0.756	8.58415e-06	0.000377025	8.95395e-10
Ppp1r1a	7.19776e-08	-0.602971	0.021	0.291	0.0013801	5.06133e-10	-0.576404	0.029	0.208	9.7046e-06	7.19776e-08	1.01227e-09
Hnrnpa2b1	3.4325e-09	-0.414492	0.979	0.885	6.58148e-05	5.31134e-10	-0.256073	0.976	0.953	1.0184e-05	3.4325e-09	1.06227e-09
Thrap3	0.00177475	-0.308223	0.723	0.713	1	5.58263e-10	-0.27067	0.626	0.757	1.07041e-05	0.00177475	1.11653e-09
Sh3bgrl3	0.00131018	-0.294186	0.691	0.709	1	6.054e-10	-0.32925	0.612	0.764	1.16079e-05	0.00131018	1.2108e-09
Bex2	9.65153e-06	-0.388913	0.096	0.318	0.185058	6.43472e-10	-0.314928	0.049	0.236	1.23379e-05	9.65153e-06	1.28694e-09
Iqgap1	2.65406e-06	-0.478925	0.564	0.706	0.050889	6.76542e-10	-0.376222	0.442	0.613	1.2972e-05	2.65406e-06	1.35308e-09
Snrpd1	1.22373e-06	-0.456669	0.809	0.804	0.0234638	7.70577e-10	-0.27459	0.796	0.873	1.4775e-05	1.22373e-06	1.54115e-09
Mt1	8.96023e-10	0.575484	0.872	0.652	1.71804e-05	0.989493	-0.68332	0.704	0.592	1	0.989493	1.79205e-09
Shd	1.191e-07	-0.505838	0.011	0.267	0.00228363	1.05208e-09	-0.27569	0.019	0.188	2.01726e-05	1.191e-07	2.10416e-09
Pygl	0.0167922	-0.272917	0.309	0.439	1	1.25907e-09	-0.314297	0.209	0.406	2.41414e-05	0.0167922	2.51814e-09
Txnip	0.000337909	-0.318117	0.245	0.432	1	1.39635e-09	-0.274779	0.117	0.312	2.67736e-05	0.000337909	2.7927e-09
Lbp	1.09089e-07	-0.300684	0.074	0.361	0.00209167	1.5255e-09	-0.469482	0.053	0.238	2.925e-05	1.09089e-07	3.051e-09
Ccnd1	2.3679e-06	-1.15799	0.383	0.564	0.0454021	1.53616e-09	-0.53386	0.374	0.566	2.94544e-05	2.3679e-06	3.07233e-09
Pcm1	0.00349954	-0.323153	0.713	0.73	1	2.08232e-09	-0.251207	0.684	0.793	3.99263e-05	0.00349954	4.16463e-09
Srsf10	6.22702e-05	-0.310994	0.67	0.747	1	2.25352e-09	-0.263754	0.612	0.756	4.32089e-05	6.22702e-05	4.50703e-09
Myo10	0.00103787	-0.256324	0.202	0.372	1	2.46795e-09	-0.262617	0.16	0.353	4.73205e-05	0.00103787	4.9359e-09
Vcan	3.03398e-06	-0.337884	0.117	0.365	0.0581736	2.70746e-09	-0.331528	0.092	0.28	5.19129e-05	3.03398e-06	5.41493e-09
Aplp2	9.06876e-06	-0.30446	0.787	0.787	0.173884	3.00719e-09	-0.304862	0.714	0.837	5.76599e-05	9.06876e-06	6.01438e-09
Tuba1a	1.09642e-05	-0.902869	0.426	0.605	0.210228	5.42566e-09	-0.613504	0.301	0.492	0.000104032	1.09642e-05	1.08513e-08
H1f0	3.38679e-05	-0.374593	0.713	0.753	0.649383	6.45687e-09	-0.314849	0.709	0.831	0.000123804	3.38679e-05	1.29137e-08
Pnrc1	5.95442e-06	-0.377894	0.628	0.74	0.11417	1.25002e-08	-0.290106	0.786	0.864	0.000239678	5.95442e-06	2.50003e-08
Tpm1	8.94423e-05	-0.55584	0.713	0.709	1	1.3393e-08	-0.640002	0.675	0.765	0.000256797	8.94423e-05	2.6786e-08
Tmsb4x	3.99319e-07	-0.712249	0.83	0.848	0.00765654	1.36957e-08	-0.870077	0.699	0.798	0.000262601	3.99319e-07	2.73914e-08
Umod	0.00124456	-0.410475	0.021	0.142	1	1.40614e-08	-0.72479	0.039	0.2	0.000269614	0.00124456	2.81228e-08
Itm2c	0.000144057	-0.31064	0.447	0.618	1	1.40633e-08	-0.26321	0.451	0.603	0.00026965	0.000144057	2.81266e-08
Slc5a3	0.000391657	-0.288562	0.202	0.389	1	1.59055e-08	-0.345905	0.121	0.298	0.000304971	0.000391657	3.18109e-08
Map1b	3.1888e-08	-0.50163	0.064	0.361	0.000611421	1.62602e-08	-0.363305	0.141	0.326	0.000311773	3.1888e-08	3.25204e-08
Tuba1b	2.17539e-06	-0.553497	0.734	0.78	0.0417109	1.83972e-08	-0.283475	0.748	0.829	0.000352748	2.17539e-06	3.67945e-08
Irx1	0.000266443	-0.632346	0.117	0.284	1	1.99481e-08	-0.586761	0.223	0.403	0.000382486	0.000266443	3.98963e-08
Akr1b3	1.97752e-07	-0.4421	0.277	0.541	0.00379169	2.70025e-08	-0.290255	0.209	0.382	0.000517747	1.97752e-07	5.40051e-08
Cd9	5.99121e-08	-0.631495	0.383	0.622	0.00114875	3.85192e-07	-0.361551	0.252	0.41	0.00738568	3.85192e-07	1.19824e-07
Kif12	6.66319e-08	0.322262	0.84	0.605	0.0012776	0.000597346	-0.253127	0.84	0.807	1	0.000597346	1.33264e-07
Sfrp1	8.70708e-08	-0.738864	0.085	0.365	0.0016695	0.0003319	-0.355031	0.078	0.172	1	0.0003319	1.74142e-07
Tspo	0.0032967	-0.492765	0.532	0.591	1	9.44013e-08	-0.34849	0.471	0.6	0.00181005	0.0032967	1.88803e-07
Clcnkb	1.91619e-06	-0.688542	0	0.206	0.036741	1.18601e-07	-0.439841	0.005	0.132	0.00227405	1.91619e-06	2.37202e-07
Epha4	1.73189e-06	-0.332521	0.064	0.301	0.0332072	1.25404e-07	-0.250815	0.053	0.202	0.0024045	1.73189e-06	2.50808e-07
Peg3	1.3335e-06	-0.472189	0.319	0.551	0.0255685	1.56028e-07	-0.622876	0.243	0.418	0.00299168	1.3335e-06	3.12056e-07
Cnn3	2.72552e-05	-0.379193	0.532	0.635	0.522591	1.69411e-07	-0.272077	0.403	0.541	0.00324828	2.72552e-05	3.38821e-07
Pkdcc	1.7255e-07	-0.569905	0.394	0.635	0.00330848	2.49399e-06	-0.389961	0.325	0.429	0.0478198	2.49399e-06	3.451e-07
Ptn	2.66395e-06	-0.697749	0.33	0.547	0.0510786	2.72126e-07	-0.399589	0.184	0.347	0.00521775	2.66395e-06	5.44252e-07
Nudt4	5.66263e-07	-1.17259	0.681	0.76	0.0108575	2.47395e-06	-1.04791	0.607	0.653	0.0474355	2.47395e-06	1.13253e-06
Sec14l1	0.000281129	-0.458826	0.277	0.473	1	1.085e-06	-0.302034	0.199	0.354	0.0208039	0.000281129	2.17001e-06
Akap12	0.360194	-0.454857	0.287	0.294	1	1.80466e-06	-0.536857	0.107	0.251	0.0346025	0.360194	3.60931e-06
Slc12a1	1.13672e-05	-1.53207	0.011	0.196	0.217956	2.0901e-06	-1.32744	0.039	0.161	0.0400756	1.13672e-05	4.1802e-06
Zmiz1	0.00444821	-0.318835	0.511	0.571	1	2.29394e-06	-0.280365	0.51	0.618	0.0439839	0.00444821	4.58787e-06
Krt18	2.30754e-06	-0.743097	0.404	0.618	0.0442447	5.92692e-05	-0.360526	0.35	0.491	1	5.92692e-05	4.61506e-06
Ccnd2	0.103926	-0.324427	0.351	0.412	1	4.77143e-06	-0.361894	0.16	0.299	0.0914874	0.103926	9.54284e-06
Tshz2	0.0023504	-0.35195	0.404	0.493	1	5.15383e-06	-0.314506	0.277	0.406	0.0988196	0.0023504	1.03076e-05
Wnk1	0.00859457	-0.593926	0.691	0.672	1	8.94972e-06	-0.355814	0.51	0.636	0.171602	0.00859457	1.78994e-05
Ckb	0.000291052	-0.445211	0.16	0.331	1	1.19559e-05	-0.429966	0.117	0.244	0.229242	0.000291052	2.39116e-05
Hspb1	0.00031648	-0.339607	0.096	0.27	1	1.40008e-05	-1.00675	0.121	0.252	0.268452	0.00031648	2.80014e-05
Myl12a	1.97657e-05	-0.389359	0.766	0.784	0.378987	0.000177463	-0.267426	0.859	0.906	1	0.000177463	3.9531e-05
Kng2	2.21668e-05	-0.787706	0.011	0.186	0.425026	0.00269682	-0.427205	0.068	0.14	1	0.00269682	4.4333e-05
Jun	0.49835	-0.275418	0.734	0.669	1	2.55716e-05	-0.457336	0.859	0.843	0.49031	0.49835	5.11426e-05
Itm2b	0.149999	-0.321756	1	0.919	1	4.64784e-05	-0.309857	1	0.985	0.891177	0.149999	9.29547e-05
Mrps6	0.0162604	-0.441569	0.574	0.662	1	5.2068e-05	-0.398761	0.529	0.602	0.998351	0.0162604	0.000104133
Lamb1	0.0190961	-0.418955	0.798	0.791	1	7.00254e-05	-0.265229	0.864	0.855	1	0.0190961	0.000140046
Vim	0.0492522	-0.64141	0.596	0.632	1	9.18506e-05	-0.670615	0.456	0.554	1	0.0492522	0.000183693
Smchd1	0.0262539	-0.251614	0.617	0.645	1	0.000160518	-0.348937	0.617	0.681	1	0.0262539	0.000321009
Chka	0.0328409	-0.320074	0.532	0.578	1	0.000174365	-0.282972	0.417	0.525	1	0.0328409	0.000348699
Ier3	0.000178308	-0.455111	0.16	0.361	1	0.000186699	-0.256509	0.17	0.283	1	0.000186699	0.000356585
Tubb2b	0.000195286	-0.596994	0.617	0.696	1	0.100566	-0.37282	0.544	0.54	1	0.100566	0.000390533
Tmem52b	0.000200577	-1.39969	0.117	0.28	1	0.194026	-0.701887	0.126	0.149	1	0.194026	0.000401113
Eva1a	0.0273264	-0.255725	0.457	0.544	1	0.000242191	-0.374907	0.505	0.548	1	0.0273264	0.000484324
Neat1	0.00134461	-0.810689	0.362	0.51	1	0.0155788	-0.456381	0.456	0.508	1	0.0155788	0.00268741
Cryab	0.00186374	-1.20024	0.096	0.24	1	0.00896633	-1.01348	0.112	0.182	1	0.00896633	0.00372402
Tagln	0.981426	-0.259148	0.181	0.186	1	0.00198586	-0.434185	0.078	0.157	1	0.981426	0.00396777
Mt2	0.00254365	0.271093	0.553	0.409	1	0.0110756	-0.497257	0.223	0.284	1	0.0110756	0.00508084
Cdkn1c	0.0592206	-0.554766	0.745	0.689	1	0.00285799	-0.751453	0.485	0.551	1	0.0592206	0.00570781
Sparc	0.318068	-0.411484	0.702	0.669	1	0.0032419	-0.445075	0.549	0.622	1	0.318068	0.0064733
Osr2	0.0610696	-0.324528	0.543	0.368	1	0.00615065	-0.408374	0.417	0.455	1	0.0610696	0.0122635
Dlk1	0.0762751	-0.313701	0.191	0.284	1	0.0100023	-0.535568	0.049	0.105	1	0.0762751	0.0199046
Anxa2	0.0119632	-0.531418	0.596	0.618	1	0.0115051	-0.534445	0.534	0.55	1	0.0119632	0.0228779
Meg3	0.314357	-0.958287	0.277	0.307	1	0.0118909	-0.868433	0.141	0.201	1	0.314357	0.0236403
Apoe	0.360437	-0.637161	0.66	0.669	1	0.225787	-0.346543	0.587	0.516	1	0.360437	0.400595
Sostdc1	0.982554	-0.873601	0.851	0.635	1	0.234891	-0.818972	0.83	0.704	1	0.982554	0.414608
Tfcp2l1	0.675391	-0.407879	0.691	0.568	1	0.25114	-0.307748	0.587	0.562	1	0.675391	0.439208
S100g	0.336856	-2.94485	0.33	0.372	1	0.376326	-2.12471	0.267	0.284	1	0.376326	0.56024

## Sheet: N.tubule.0_EPT.Mut.CTRL.marker
Gene	Mutant_p_val	Mutant_avg_logFC	Mutant_pct.1	Mutant_pct.2	Mutant_p_val_adj	CTRL_p_val	CTRL_avg_logFC	CTRL_pct.1	CTRL_pct.2	CTRL_p_val_adj	max_pval	minimump_p_val
Cyp4a10	7.68203e-13	0.25182	0.655	0.215	1.47295e-08	2.47712e-75	0.549839	0.714	0.155	4.74962e-71	7.68203e-13	4.95423e-75
Cyp4a31	3.80849e-20	0.411894	0.793	0.251	7.3024e-16	9.36362e-75	0.782895	0.866	0.298	1.79538e-70	3.80849e-20	1.87272e-74
Cpb2	2.62871e-19	0.4138	0.828	0.297	5.04029e-15	5.05696e-74	0.822387	0.938	0.459	9.69622e-70	2.62871e-19	1.01139e-73
Gipc2	7.83234e-15	0.501415	0.897	0.495	1.50177e-10	6.1715e-73	0.716532	0.952	0.51	1.18332e-68	7.83234e-15	1.2343e-72
Tcea3	1.19633e-19	0.417489	0.805	0.29	2.29385e-15	8.73413e-72	0.649319	0.812	0.269	1.67468e-67	1.19633e-19	1.74683e-71
Rplp1	1.22853e-16	0.382745	1	0.967	2.35557e-12	3.30762e-66	0.449297	1	0.995	6.34204e-62	1.22853e-16	6.61525e-66
Slc39a5	8.44128e-17	0.479584	0.954	0.403	1.61853e-12	4.77275e-66	0.684936	0.935	0.378	9.15126e-62	8.44128e-17	9.54549e-66
Abhd14a	2.14741e-09	0.284639	0.839	0.535	4.11744e-05	1.77041e-64	0.624629	0.938	0.6	3.39458e-60	2.14741e-09	3.54082e-64
Slc39a8	3.77236e-14	0.370363	0.701	0.294	7.23312e-10	1.42964e-62	0.619231	0.872	0.397	2.7412e-58	3.77236e-14	2.85929e-62
Calml4	1.25705e-15	0.653973	1	0.591	2.41027e-11	4.22086e-61	0.860619	0.994	0.641	8.09308e-57	1.25705e-15	8.44173e-61
Psma4	5.3282e-15	0.449207	0.989	0.851	1.02163e-10	5.52904e-61	0.596771	1	0.916	1.06014e-56	5.3282e-15	1.10581e-60
Anks4b	6.95514e-15	0.295893	0.839	0.327	1.33358e-10	1.2478e-60	0.452593	0.836	0.297	2.39253e-56	6.95514e-15	2.49559e-60
Rps12	1.90322e-22	0.56538	1	0.954	3.64923e-18	2.23857e-59	0.489103	1	0.986	4.29223e-55	1.90322e-22	4.47714e-59
Tmem176a	6.63429e-07	0.401071	0.931	0.776	0.0127206	2.82383e-59	0.84116	1	0.928	5.41441e-55	6.63429e-07	5.64766e-59
Rps19	1.69349e-31	0.695771	1	0.99	3.2471e-27	4.36282e-58	0.452697	1	0.996	8.36528e-54	1.69349e-31	8.72565e-58
Phgdh	9.74446e-22	0.909696	1	0.769	1.8684e-17	1.85577e-57	0.732334	0.997	0.77	3.55826e-53	9.74446e-22	3.71155e-57
Prrc2c	7.42481e-09	0.371542	0.977	0.809	0.000142363	2.49628e-57	0.611074	0.997	0.859	4.78637e-53	7.42481e-09	4.99256e-57
Acot1	3.26898e-15	0.499135	0.977	0.594	6.26795e-11	1.45592e-56	0.673615	0.976	0.698	2.79159e-52	3.26898e-15	2.91185e-56
Aspa	5.88964e-10	0.254812	0.77	0.343	1.12928e-05	4.22583e-55	0.664258	0.893	0.355	8.1026e-51	5.88964e-10	8.45165e-55
Perp	2.9612e-17	0.285899	0.655	0.195	5.6778e-13	5.4875e-54	0.317168	0.664	0.193	1.05217e-49	2.9612e-17	1.0975e-53
Tmem176b	1.09492e-06	0.475896	1	0.878	0.020994	3.35838e-53	0.851065	1	0.963	6.43935e-49	1.09492e-06	6.71675e-53
Eef1a1	2.61635e-18	0.455043	1	0.997	5.01658e-14	5.4962e-52	0.36563	1	1	1.05384e-47	2.61635e-18	1.09924e-51
Frem2	3.67526e-11	0.304538	0.77	0.403	7.04695e-07	8.54124e-51	0.456187	0.833	0.389	1.6377e-46	3.67526e-11	1.70825e-50
Zfp697	3.9206e-17	0.278263	0.793	0.31	7.51736e-13	3.15676e-50	0.401723	0.792	0.335	6.05278e-46	3.9206e-17	6.31353e-50
Pecr	1.21112e-11	0.325502	0.885	0.488	2.3222e-07	8.74953e-47	0.547913	0.932	0.577	1.67764e-42	1.21112e-11	1.74991e-46
Slc44a4	4.70378e-15	0.263824	0.667	0.218	9.01902e-11	1.04734e-46	0.351591	0.667	0.214	2.00817e-42	4.70378e-15	2.09468e-46
Cpn1	3.12794e-09	0.252559	0.989	0.525	5.99751e-05	1.86333e-46	0.517384	0.991	0.669	3.57274e-42	3.12794e-09	3.72665e-46
Rpl30	6.67624e-14	0.39754	1	0.937	1.2801e-09	5.63612e-46	0.371022	1	0.985	1.08067e-41	6.67624e-14	1.12722e-45
Aldoa	4.47109e-05	-0.463979	0.989	0.931	0.857287	7.77715e-46	-0.691728	0.982	0.981	1.49119e-41	4.47109e-05	1.55543e-45
Rps25	6.9811e-11	0.338762	1	0.924	1.33856e-06	8.55777e-46	0.393141	1	0.971	1.64087e-41	6.9811e-11	1.71155e-45
Grtp1	2.20397e-11	0.267181	0.678	0.297	4.2259e-07	2.35781e-44	0.293465	0.714	0.257	4.52086e-40	2.20397e-11	4.71562e-44
Rps29	1.15924e-13	0.326705	1	0.993	2.22272e-09	1.83856e-43	0.30385	1	0.999	3.52525e-39	1.15924e-13	3.67711e-43
Rpl23	1.91306e-15	0.370883	1	0.977	3.66811e-11	2.22487e-43	0.30093	1	0.999	4.26596e-39	1.91306e-15	4.44973e-43
Rnf6	4.29279e-12	0.331852	0.931	0.611	8.231e-08	5.90813e-43	0.597403	0.94	0.687	1.13282e-38	4.29279e-12	1.18163e-42
Rpl19	1.73234e-10	0.272052	1	0.983	3.3216e-06	1.2828e-42	0.30455	1	0.993	2.45963e-38	1.73234e-10	2.56559e-42
Rpl39	2.31554e-14	0.349889	1	0.987	4.43983e-10	2.3669e-42	0.319902	1	0.993	4.53829e-38	2.31554e-14	4.7338e-42
Trps1	1.55461e-17	0.536678	0.908	0.531	2.98081e-13	7.16894e-42	0.425461	0.908	0.571	1.37457e-37	1.55461e-17	1.43379e-41
Rps21	4.39768e-16	0.410718	1	0.97	8.43212e-12	1.03068e-41	0.344693	1	0.986	1.97623e-37	4.39768e-16	2.06136e-41
Rack1	8.64155e-13	0.321204	1	0.97	1.65693e-08	1.15391e-41	0.328454	1	0.988	2.21252e-37	8.64155e-13	2.30783e-41
Rpsa	7.22685e-16	0.452902	1	0.977	1.38568e-11	1.32965e-41	0.403753	1	0.986	2.54947e-37	7.22685e-16	2.6593e-41
Gclm	1.94957e-06	0.583304	0.931	0.723	0.0373811	5.72586e-41	0.804813	0.97	0.789	1.09788e-36	1.94957e-06	1.14517e-40
Rps20	5.13131e-13	0.36853	1	0.974	9.83877e-09	8.35188e-41	0.362549	1	0.988	1.60139e-36	5.13131e-13	1.67038e-40
Rps16	4.18247e-19	0.482364	1	0.967	8.01946e-15	9.60985e-41	0.349937	1	0.993	1.84259e-36	4.18247e-19	1.92197e-40
Rpl27a	1.37292e-15	0.412229	1	0.974	2.63243e-11	1.12628e-40	0.350475	1	0.99	2.15953e-36	1.37292e-15	2.25256e-40
Csrp2	2.5134e-19	0.634342	0.977	0.752	4.8192e-15	1.27819e-40	0.519061	0.979	0.8	2.4508e-36	2.5134e-19	2.55638e-40
Bmp4	8.35559e-14	0.371443	0.747	0.363	1.6021e-09	2.2115e-40	0.416404	0.902	0.524	4.24033e-36	8.35559e-14	4.423e-40
Rpl28	1.06603e-19	0.45016	1	0.97	2.044e-15	3.17444e-40	0.326374	1	0.992	6.08666e-36	1.06603e-19	6.34887e-40
Rps27a	4.50519e-17	0.457843	1	0.983	8.63824e-13	7.61324e-40	0.364223	1	0.997	1.45976e-35	4.50519e-17	1.52265e-39
Rpl22	3.98612e-16	0.472429	0.989	0.898	7.64299e-12	1.17043e-39	0.362668	1	0.97	2.24419e-35	3.98612e-16	2.34087e-39
Rpl18a	4.46074e-17	0.482662	1	0.964	8.55301e-13	1.40895e-39	0.375685	1	0.995	2.70152e-35	4.46074e-17	2.8179e-39
Rps6	7.88056e-16	0.393795	1	0.95	1.51102e-11	2.04838e-39	0.323408	1	0.978	3.92756e-35	7.88056e-16	4.09676e-39
Tpmt	2.49857e-09	0.29758	0.92	0.571	4.79076e-05	2.34789e-39	0.466753	0.949	0.649	4.50185e-35	2.49857e-09	4.69578e-39
B3gat2	4.87791e-20	0.466731	0.805	0.287	9.3529e-16	3.01291e-39	0.350298	0.741	0.307	5.77696e-35	4.87791e-20	6.02583e-39
Cox6c	1.12995e-09	-0.462158	1	0.983	2.16657e-05	3.64354e-39	-0.619152	0.997	0.99	6.98613e-35	1.12995e-09	7.28709e-39
Irx3	2.21858e-11	0.31319	0.678	0.307	4.25391e-07	3.58952e-38	0.46281	0.81	0.388	6.88255e-34	2.21858e-11	7.17905e-38
Rplp0	6.04007e-17	0.486423	1	0.974	1.15812e-12	2.47577e-37	0.357971	1	0.989	4.74705e-33	6.04007e-17	4.95155e-37
Rpl14	3.40329e-13	0.358857	1	0.964	6.52547e-09	2.8037e-37	0.318742	1	0.989	5.37581e-33	3.40329e-13	5.6074e-37
Rps18	7.26748e-14	0.400998	1	0.964	1.39347e-09	7.4163e-37	0.339571	1	0.992	1.422e-32	7.26748e-14	1.48326e-36
Fau	8.38792e-11	0.296292	1	0.967	1.6083e-06	1.8934e-36	0.268519	1	0.995	3.6304e-32	8.38792e-11	3.7868e-36
Creb3l1	5.08861e-14	0.295433	0.713	0.281	9.7569e-10	2.40267e-36	0.308216	0.679	0.283	4.60687e-32	5.08861e-14	4.80534e-36
Cdkl1	7.5281e-06	-0.486373	0.425	0.584	0.144344	4.4718e-36	-0.681871	0.205	0.565	8.57422e-32	7.5281e-06	8.94359e-36
Eef1b2	2.34838e-12	0.383568	1	0.924	4.50278e-08	7.71851e-36	0.320321	1	0.963	1.47995e-31	2.34838e-12	1.5437e-35
Rps4x	1.59964e-19	0.521421	1	0.977	3.06715e-15	8.56656e-36	0.334991	1	0.986	1.64255e-31	1.59964e-19	1.71331e-35
Gucd1	1.17329e-12	0.30514	0.862	0.459	2.24967e-08	1.09128e-35	0.279086	0.777	0.358	2.09241e-31	1.17329e-12	2.18255e-35
Rps8	3.45292e-20	0.481311	1	0.993	6.62062e-16	1.37106e-35	0.305628	1	0.999	2.62887e-31	3.45292e-20	2.74212e-35
Rpl10a	5.59601e-13	0.406758	1	0.96	1.07298e-08	1.95945e-35	0.347272	1	0.993	3.75705e-31	5.59601e-13	3.9189e-35
Rps13	9.05874e-13	0.339943	0.989	0.974	1.73692e-08	2.49926e-35	0.302883	1	0.988	4.79208e-31	9.05874e-13	4.99852e-35
Rpl13	1.68515e-18	0.437388	1	0.993	3.2311e-14	3.39635e-35	0.303943	1	0.999	6.51217e-31	1.68515e-18	6.79271e-35
Arhgap42	1.48493e-16	0.332385	0.736	0.29	2.8472e-12	5.82151e-35	0.289753	0.732	0.339	1.11622e-30	1.48493e-16	1.1643e-34
Slc9a3r1	3.27416e-19	0.60037	0.966	0.653	6.27788e-15	6.06187e-35	0.387123	0.932	0.577	1.1623e-30	3.27416e-19	1.21237e-34
Rplp2	1.29538e-14	0.370627	1	0.967	2.48375e-10	6.07242e-35	0.292564	1	0.985	1.16433e-30	1.29538e-14	1.21448e-34
Rps5	6.64275e-14	0.437796	1	0.98	1.27368e-09	6.62584e-35	0.349636	0.997	0.989	1.27044e-30	6.64275e-14	1.32517e-34
Lmo4	8.86115e-11	0.264296	0.862	0.505	1.69904e-06	7.34726e-35	0.544965	0.914	0.678	1.40876e-30	8.86115e-11	1.46945e-34
Keg1	2.07594e-15	0.520597	0.966	0.399	3.98041e-11	9.53933e-35	0.423845	0.881	0.401	1.82907e-30	2.07594e-15	1.90787e-34
Rpl10	2.83189e-17	0.434272	1	0.941	5.42986e-13	9.77629e-35	0.290711	1	0.982	1.87451e-30	2.83189e-17	1.95526e-34
Rpl6	3.52461e-15	0.359837	1	0.983	6.7581e-11	1.04569e-34	0.286025	1	0.996	2.005e-30	3.52461e-15	2.09137e-34
Rpl12	5.72801e-13	0.393231	1	0.954	1.09829e-08	3.8192e-34	0.340348	1	0.995	7.32293e-30	5.72801e-13	7.63839e-34
Slc23a1	2.85307e-12	0.308188	0.816	0.32	5.47047e-08	1.07731e-33	0.379739	0.804	0.344	2.06563e-29	2.85307e-12	2.15462e-33
Rps11	7.3794e-13	0.381416	1	0.96	1.41493e-08	1.10403e-33	0.297886	1	0.986	2.11688e-29	7.3794e-13	2.20807e-33
Rpl15	8.69518e-15	0.409064	1	0.964	1.66721e-10	1.32365e-33	0.273973	1	0.99	2.53796e-29	8.69518e-15	2.64729e-33
Rpl32	6.97046e-15	0.422631	1	0.974	1.33652e-10	2.36157e-33	0.333557	1	0.992	4.52808e-29	6.97046e-15	4.72315e-33
Rps2	1.04877e-14	0.388716	1	0.983	2.01092e-10	4.07619e-33	0.302743	1	0.992	7.8157e-29	1.04877e-14	8.15239e-33
Myo6	5.04579e-10	0.306173	0.966	0.706	9.6748e-06	5.34139e-33	0.357887	0.982	0.805	1.02416e-28	5.04579e-10	1.06828e-32
Rpl35a	3.01927e-12	0.310387	1	0.98	5.78916e-08	6.27319e-33	0.266497	1	0.995	1.20282e-28	3.01927e-12	1.25464e-32
Ezr	2.50111e-07	0.265025	0.989	0.828	0.00479562	7.28496e-33	0.384681	1	0.959	1.39682e-28	2.50111e-07	1.45699e-32
Rpl37a	1.08946e-12	0.297095	1	0.987	2.08894e-08	8.64953e-33	0.255281	1	0.995	1.65846e-28	1.08946e-12	1.72991e-32
Idh2	0.217814	-0.264836	0.954	0.851	1	2.05371e-32	-0.529751	0.955	0.946	3.93778e-28	0.217814	4.10742e-32
Kif12	9.11116e-09	0.265395	0.92	0.587	0.000174697	2.73652e-32	0.402428	0.967	0.743	5.247e-28	9.11116e-09	5.47303e-32
Rpl36a	7.81132e-14	0.398918	1	0.944	1.49774e-09	4.67019e-32	0.312274	1	0.98	8.95462e-28	7.81132e-14	9.34038e-32
Steap2	1.78161e-12	0.279535	0.885	0.446	3.41606e-08	6.01313e-32	0.345951	0.821	0.441	1.15296e-27	1.78161e-12	1.20263e-31
Rps7	6.52641e-14	0.429881	1	0.954	1.25137e-09	7.39283e-32	0.316463	1	0.99	1.4175e-27	6.52641e-14	1.47857e-31
Gm45792	1.97969e-21	0.567462	0.782	0.231	3.79585e-17	1.09206e-31	0.482016	0.554	0.199	2.09392e-27	1.97969e-21	2.18412e-31
0610005C13Rik	1.99806e-17	0.589992	0.954	0.436	3.83108e-13	2.1956e-31	0.334154	0.833	0.38	4.20985e-27	1.99806e-17	4.39121e-31
Rps10	9.96783e-15	0.390344	1	0.99	1.91123e-10	2.31178e-31	0.283719	1	0.995	4.4326e-27	9.96783e-15	4.62356e-31
Rps26	1.68351e-11	0.375601	1	0.941	3.22796e-07	3.22545e-31	0.32241	1	0.986	6.18448e-27	1.68351e-11	6.4509e-31
Rpl37	3.76057e-11	0.346929	1	0.974	7.21051e-07	3.82088e-31	0.285221	1	0.992	7.32615e-27	3.76057e-11	7.64176e-31
Gpi1	0.00295662	-0.353015	0.943	0.881	1	4.09047e-31	-0.513286	0.949	0.946	7.84307e-27	0.00295662	8.18094e-31
Rps24	3.65902e-10	0.301591	1	0.98	7.0158e-06	5.26568e-31	0.268274	1	0.995	1.00964e-26	3.65902e-10	1.05314e-30
Atp5b	0.000295782	-0.321789	0.989	0.993	1	8.63427e-31	-0.524738	0.997	0.997	1.65553e-26	0.000295782	1.72685e-30
Rida	2.03951e-08	0.338834	0.989	0.739	0.000391055	1.01222e-30	0.475906	0.997	0.891	1.94083e-26	2.03951e-08	2.02444e-30
Mrpl50	6.613e-12	0.269929	0.92	0.644	1.26798e-07	2.28263e-30	0.329284	0.946	0.729	4.37672e-26	6.613e-12	4.56527e-30
Rpl41	1.40791e-16	0.438733	1	0.983	2.69953e-12	8.50716e-30	0.257449	1	0.996	1.63116e-25	1.40791e-16	1.70143e-29
Atp5o.1	0.00135194	-0.290546	0.989	0.954	1	1.75017e-29	-0.543098	0.991	0.981	3.35577e-25	0.00135194	3.50034e-29
Gk	6.01422e-09	0.366938	0.805	0.459	0.000115317	2.6194e-29	0.284101	0.946	0.536	5.02244e-25	6.01422e-09	5.2388e-29
2200002D01Rik	1.5539e-14	0.294317	0.701	0.257	2.97944e-10	3.7682e-29	0.2944	0.628	0.261	7.22514e-25	1.5539e-14	7.5364e-29
Chchd10	2.03321e-06	-0.574119	0.989	0.911	0.0389848	4.3591e-29	-0.846195	0.97	0.92	8.35813e-25	2.03321e-06	8.71819e-29
Gabarapl1	2.721e-05	-0.541351	0.414	0.554	0.521724	5.47946e-29	-0.647563	0.307	0.586	1.05063e-24	2.721e-05	1.09589e-28
Hint1	3.3532e-10	0.270892	0.989	0.927	6.42943e-06	2.31813e-28	0.279975	0.997	0.971	4.44478e-24	3.3532e-10	4.63626e-28
Jund	3.61852e-06	0.264283	0.943	0.835	0.0693816	2.79138e-28	0.394049	0.994	0.933	5.35219e-24	3.61852e-06	5.58276e-28
Arid5b	5.88815e-11	0.285913	0.874	0.518	1.12899e-06	3.27936e-28	0.329302	0.94	0.713	6.28784e-24	5.88815e-11	6.55872e-28
Rpl35	5.96781e-15	0.385949	1	0.95	1.14427e-10	3.48435e-28	0.257273	1	0.985	6.68089e-24	5.96781e-15	6.9687e-28
Wfdc15b	1.1447e-08	-0.666992	0.011	0.31	0.000219485	3.48515e-28	-0.772815	0.021	0.325	6.68243e-24	1.1447e-08	6.97031e-28
Esd	5.93423e-08	0.291167	0.989	0.898	0.00113783	1.16764e-27	0.311772	1	0.971	2.23883e-23	5.93423e-08	2.33528e-27
Rpl17	5.64836e-10	0.294332	1	0.98	1.08302e-05	2.31406e-27	0.259896	1	0.999	4.43698e-23	5.64836e-10	4.62812e-27
Rpl21	1.01592e-11	0.338535	1	0.967	1.94793e-07	3.1009e-27	0.268296	1	0.984	5.94567e-23	1.01592e-11	6.2018e-27
Cotl1	1.75864e-08	0.25929	0.966	0.68	0.000337201	3.95813e-27	0.306696	0.979	0.735	7.58932e-23	1.75864e-08	7.91626e-27
Rps23	1.65269e-12	0.335964	1	0.967	3.16887e-08	4.29462e-27	0.263143	1	0.988	8.23451e-23	1.65269e-12	8.58924e-27
Npnt	2.81592e-09	0.470161	1	0.686	5.39924e-05	1.31708e-26	0.449295	0.979	0.733	2.52536e-22	2.81592e-09	2.63415e-26
Rpl34	1.54149e-11	0.362134	1	0.95	2.95566e-07	1.40913e-26	0.264368	1	0.982	2.70187e-22	1.54149e-11	2.81827e-26
Rpl23a	1.99314e-09	0.270469	1	0.947	3.82164e-05	1.75951e-26	0.2565	1	0.984	3.37369e-22	1.99314e-09	3.51902e-26
Cdh16	8.27804e-05	-0.553502	0.851	0.752	1	2.48246e-26	-0.667137	0.696	0.803	4.75986e-22	8.27804e-05	4.96491e-26
Mcm6	1.10433e-07	0.25066	0.759	0.419	0.00211745	2.6024e-26	0.297007	0.738	0.396	4.98984e-22	1.10433e-07	5.2048e-26
Rpl13a	3.3287e-08	0.277591	0.966	0.799	0.000638245	3.20415e-26	0.282662	0.994	0.906	6.14364e-22	3.3287e-08	6.4083e-26
Rps27	2.49629e-14	0.359931	1	0.977	4.78639e-10	5.11181e-26	0.271156	1	0.988	9.80138e-22	2.49629e-14	1.02236e-25
Impdh2	2.07251e-10	0.316337	0.92	0.647	3.97383e-06	8.57083e-26	0.317122	0.911	0.661	1.64337e-21	2.07251e-10	1.71417e-25
Fstl1	0.0280534	-0.79895	0.655	0.561	1	1.11423e-25	-0.981842	0.369	0.596	2.13642e-21	0.0280534	2.22845e-25
Prdx5	1.10033e-06	-0.869299	0.931	0.878	0.0210977	1.14266e-25	-0.746688	0.94	0.94	2.19093e-21	1.10033e-06	2.28531e-25
Atp5h	0.00066319	-0.296206	1	0.947	1	1.4249e-25	-0.414546	0.994	0.986	2.7321e-21	0.00066319	2.8498e-25
Kcnj16	1.12365e-05	-0.487108	0.356	0.535	0.215448	1.82349e-25	-0.469769	0.125	0.423	3.49636e-21	1.12365e-05	3.64698e-25
Cox8a	0.000308332	-0.312214	0.977	0.977	1	2.96908e-25	-0.466569	0.997	0.999	5.69291e-21	0.000308332	5.93815e-25
Lrrcc1	6.05664e-15	0.465048	0.793	0.446	1.1613e-10	4.22968e-25	0.344483	0.771	0.468	8.10998e-21	6.05664e-15	8.45935e-25
Npm1	3.67378e-07	0.348592	0.989	0.937	0.00704411	4.36848e-25	0.302056	1	0.978	8.37613e-21	3.67378e-07	8.73696e-25
Atp5l	1.05408e-05	-0.404431	0.977	0.947	0.202109	8.88747e-25	-0.418885	1	0.984	1.70408e-20	1.05408e-05	1.77749e-24
Rps15a	6.47654e-11	0.348355	1	0.97	1.24181e-06	9.74014e-25	0.259359	1	0.984	1.86758e-20	6.47654e-11	1.94803e-24
Tspan13	1.94246e-08	0.264427	0.897	0.627	0.000372448	1.66539e-24	0.400015	0.836	0.577	3.19322e-20	1.94246e-08	3.33078e-24
Scd2	0.106842	-0.387944	0.897	0.772	1	2.27598e-24	-0.698502	0.589	0.754	4.36397e-20	0.106842	4.55196e-24
Cox6b1	0.000208297	-0.345415	0.989	0.941	1	4.90761e-24	-0.462206	0.985	0.981	9.40985e-20	0.000208297	9.81522e-24
Cox5b	0.00013526	-0.350763	1	0.934	1	5.05053e-24	-0.54912	0.991	0.966	9.68388e-20	0.00013526	1.01011e-23
Adamts1	2.73044e-10	0.374441	0.908	0.538	5.23534e-06	7.63962e-24	0.327535	0.958	0.68	1.46482e-19	2.73044e-10	1.52792e-23
Mdh2	1.83346e-05	-0.405808	0.977	0.921	0.351548	9.05094e-24	-0.463256	0.982	0.963	1.73543e-19	1.83346e-05	1.81019e-23
Cox7a2	1.1603e-06	-0.377938	0.977	0.941	0.0222476	3.50326e-23	-0.452857	0.997	0.971	6.71715e-19	1.1603e-06	7.00652e-23
Slc6a13	8.29744e-15	0.362899	0.851	0.343	1.59095e-10	4.05794e-23	0.331786	0.708	0.347	7.7807e-19	8.29744e-15	8.11588e-23
Glul	8.02389e-14	0.486333	0.908	0.564	1.5385e-09	6.70789e-23	0.422623	0.824	0.532	1.28617e-18	8.02389e-14	1.34158e-22
Hnrnpf	1.90623e-08	0.269689	0.977	0.875	0.0003655	7.94133e-23	0.262914	0.985	0.927	1.52267e-18	1.90623e-08	1.58827e-22
Rpl3	2.25627e-15	0.435732	1	0.97	4.32616e-11	9.87951e-23	0.254734	1	0.995	1.8943e-18	2.25627e-15	1.9759e-22
Gnai1	1.93966e-16	0.526883	0.954	0.584	3.71911e-12	1.32226e-22	0.334237	0.914	0.638	2.5353e-18	1.93966e-16	2.64452e-22
Usmg5	0.00505551	-0.297096	0.989	0.898	1	1.92372e-22	-0.517276	0.97	0.947	3.68853e-18	0.00505551	3.84743e-22
Minos1	5.1688e-05	-0.29811	0.966	0.927	0.991066	2.94497e-22	-0.417341	0.961	0.947	5.64669e-18	5.1688e-05	5.88995e-22
Cox7c	0.000283683	-0.273654	1	0.98	1	5.96115e-22	-0.393556	0.994	0.99	1.14299e-17	0.000283683	1.19223e-21
Cycs	7.3046e-07	-0.697261	0.908	0.855	0.0140058	8.96553e-22	-0.704346	0.795	0.829	1.71905e-17	7.3046e-07	1.79311e-21
Mal	3.77932e-05	-1.39195	0.161	0.347	0.724646	1.21101e-21	-1.11332	0.042	0.293	2.322e-17	3.77932e-05	2.42203e-21
Uqcr11	0.000151232	-0.293899	0.989	0.95	1	9.42811e-21	-0.471444	0.982	0.981	1.80775e-16	0.000151232	1.88562e-20
Tfap2b	2.48165e-07	-0.715526	0.011	0.267	0.00475831	1.66511e-20	-0.603845	0.015	0.244	3.19269e-16	2.48165e-07	3.33023e-20
Wfdc2	0.531332	-1.48747	0.77	0.558	1	1.8677e-20	-1.69201	0.232	0.471	3.58112e-16	0.531332	3.73539e-20
Aadat	3.52272e-14	1.41772	0.759	0.33	6.75446e-10	2.75503e-20	0.402542	0.696	0.384	5.28249e-16	3.52272e-14	5.51006e-20
Lrpap1	6.50827e-16	0.681427	0.977	0.782	1.2479e-11	4.64532e-20	0.336756	0.967	0.829	8.90694e-16	6.50827e-16	9.29065e-20
Mecom	0.00541056	-0.650103	0.23	0.333	1	7.50276e-20	-0.705309	0.125	0.363	1.43858e-15	0.00541056	1.50055e-19
Ppargc1a	0.31867	-0.291668	0.506	0.469	1	8.81682e-20	-0.41525	0.185	0.441	1.69054e-15	0.31867	1.76336e-19
Sema3c	9.39966e-20	0.569526	0.92	0.495	1.80229e-15	1.00223e-19	0.299562	0.896	0.611	1.92168e-15	1.00223e-19	1.87993e-19
Aco2	0.0234428	-0.362333	0.943	0.865	1	1.43281e-19	-0.521346	0.952	0.928	2.74727e-15	0.0234428	2.86562e-19
Gm19950	1.75624e-19	0.510373	0.839	0.304	3.36742e-15	2.72226e-19	0.355232	0.583	0.282	5.21967e-15	2.72226e-19	3.51248e-19
Atp5g3	2.43981e-05	-0.341852	0.989	0.934	0.467809	2.22308e-19	-0.439444	0.988	0.97	4.26253e-15	2.43981e-05	4.44615e-19
Gm42418	3.42771e-09	-0.772787	1	1	6.57229e-05	2.93403e-19	-0.675693	1	1	5.62571e-15	3.42771e-09	5.86806e-19
Vcam1	4.18406e-12	0.375375	0.575	0.218	8.02252e-08	5.48576e-19	0.47193	0.554	0.273	1.05184e-14	4.18406e-12	1.09715e-18
Gcsh	5.48525e-10	0.319341	0.989	0.733	1.05174e-05	5.7342e-19	0.293386	0.935	0.784	1.09948e-14	5.48525e-10	1.14684e-18
Atp5k	4.91233e-06	-0.388613	1	0.977	0.094189	9.94078e-19	-0.468487	0.991	0.981	1.90605e-14	4.91233e-06	1.98816e-18
Ndrg1	0.0497295	-0.760904	0.54	0.508	1	1.33259e-18	-0.957254	0.324	0.552	2.5551e-14	0.0497295	2.66517e-18
Atp5g1	1.83964e-06	-0.502508	1	0.97	0.0352733	1.36173e-18	-0.605579	0.997	0.984	2.61099e-14	1.83964e-06	2.72346e-18
Ndufa5	0.00021847	-0.361613	0.966	0.875	1	2.15074e-18	-0.435696	0.917	0.882	4.12383e-14	0.00021847	4.30149e-18
Sdhb	0.00688192	-0.363573	0.908	0.861	1	2.91635e-18	-0.52867	0.908	0.902	5.59182e-14	0.00688192	5.83271e-18
Cox6a1	2.35975e-08	-0.514315	0.966	0.934	0.000452459	3.63906e-18	-0.461874	0.967	0.958	6.97753e-14	2.35975e-08	7.27812e-18
Tmem213	5.00353e-08	-1.27906	0.046	0.333	0.000959377	4.61956e-18	-1.16095	0.051	0.271	8.85755e-14	5.00353e-08	9.23913e-18
Shd	0.000325742	-0.49662	0.08	0.241	1	4.63295e-18	-0.314366	0.015	0.22	8.88322e-14	0.000325742	9.2659e-18
mt-Co1	0.00158729	-0.390705	1	0.993	1	9.06177e-18	-0.316713	1	0.993	1.7375e-13	0.00158729	1.81235e-17
Ndufb8	0.0150474	-0.282183	0.977	0.931	1	1.62834e-17	-0.455818	0.994	0.966	3.12219e-13	0.0150474	3.25669e-17
Ldhb	0.00117883	-0.425617	0.989	0.917	1	7.68739e-17	-0.590457	0.86	0.898	1.47398e-12	0.00117883	1.53748e-16
Ccdc34	1.05431e-08	0.381639	0.862	0.614	0.000202153	8.26674e-17	0.291531	0.923	0.694	1.58506e-12	1.05431e-08	1.65335e-16
Dlat	0.0392135	-0.335487	0.77	0.68	1	8.38615e-17	-0.336473	0.545	0.649	1.60796e-12	0.0392135	1.67723e-16
Tox3	0.000744767	-0.274864	0.138	0.29	1	8.57647e-17	-0.306307	0.033	0.235	1.64445e-12	0.000744767	1.71529e-16
Dusp9	0.00852799	-0.592821	0.23	0.32	1	8.83829e-17	-0.533111	0.113	0.332	1.69465e-12	0.00852799	1.76766e-16
Hk1	0.000128819	-0.34497	0.103	0.281	1	1.19536e-16	-0.265147	0.039	0.241	2.29198e-12	0.000128819	2.39072e-16
Cldn19	0.00309161	-0.4308	0.103	0.231	1	1.3414e-16	-0.358203	0.015	0.205	2.572e-12	0.00309161	2.68279e-16
Uqcrq	3.43881e-10	-0.624461	0.977	0.917	6.59357e-06	1.94454e-16	-0.600764	0.964	0.939	3.72846e-12	3.43881e-10	3.88908e-16
Ndufc1	9.13161e-06	-0.372974	1	0.901	0.175089	2.07835e-16	-0.411043	0.97	0.952	3.98502e-12	9.13161e-06	4.15669e-16
Slc25a5	0.0354608	-0.33918	0.989	0.947	1	2.52654e-16	-0.66622	0.979	0.951	4.84438e-12	0.0354608	5.05307e-16
Ndufs5	2.70259e-06	-0.408665	0.931	0.891	0.0518195	4.488e-16	-0.324509	0.952	0.912	8.6053e-12	2.70259e-06	8.97601e-16
Npb	0.000671789	-0.428252	0.126	0.284	1	6.61852e-16	-0.327447	0.006	0.184	1.26903e-11	0.000671789	1.3237e-15
Uqcrfs1	0.0815885	-0.325959	0.989	0.891	1	1.61811e-15	-0.423989	0.982	0.943	3.10256e-11	0.0815885	3.23622e-15
Uqcr10	0.000639647	-0.33722	1	0.931	1	1.96322e-15	-0.440226	0.994	0.967	3.76429e-11	0.000639647	3.92645e-15
Cited2	1.39558e-10	0.542193	0.943	0.729	2.67589e-06	3.29807e-15	0.295804	0.976	0.872	6.32371e-11	1.39558e-10	6.59613e-15
Cyc1	5.9989e-05	-0.405839	0.966	0.924	1	3.63574e-15	-0.51251	0.97	0.921	6.97117e-11	5.9989e-05	7.27148e-15
Cebpd	0.00462197	0.325838	0.241	0.129	1	5.60459e-15	0.731665	0.429	0.227	1.07462e-10	0.00462197	1.12092e-14
Car12	0.0126684	-0.612423	0.402	0.452	1	7.93614e-15	-0.479453	0.164	0.377	1.52168e-10	0.0126684	1.58723e-14
Nudt4	0.197855	-0.959021	0.828	0.716	1	8.54084e-15	-1.16782	0.577	0.675	1.63762e-10	0.197855	1.70817e-14
Ndufs2	0.0543604	-0.272225	0.966	0.898	1	1.03057e-14	-0.310675	0.985	0.947	1.97601e-10	0.0543604	2.06113e-14
Tmem72	9.26901e-05	-0.322577	0.023	0.191	1	1.03652e-14	-0.272491	0.012	0.181	1.98742e-10	9.26901e-05	2.07304e-14
Krt7	0.000175496	-0.721003	0.149	0.327	1	1.40691e-14	-0.475833	0.074	0.271	2.6976e-10	0.000175496	2.81381e-14
Spp1	1.07975e-06	-1.3811	0.287	0.502	0.0207031	1.52155e-14	-1.13855	0.158	0.377	2.91742e-10	1.07975e-06	3.0431e-14
Wwp1	6.65664e-06	0.260334	0.793	0.601	0.127634	2.44926e-14	0.271813	0.81	0.581	4.69622e-10	6.65664e-06	4.89853e-14
Slc12a1	0.000114364	-1.50969	0.023	0.188	1	2.70988e-14	-1.46362	0.021	0.19	5.19593e-10	0.000114364	5.41977e-14
Cryl1	0.560674	-0.364659	0.506	0.432	1	2.81347e-14	-0.537933	0.149	0.348	5.39455e-10	0.560674	5.62694e-14
2010107E04Rik	0.00167893	-0.289087	1	0.894	1	2.98988e-14	-0.359628	0.97	0.952	5.73279e-10	0.00167893	5.97976e-14
Anxa5	0.0103418	-0.331991	0.736	0.663	1	3.15936e-14	-0.402585	0.586	0.687	6.05776e-10	0.0103418	6.31873e-14
Cox4i1	4.53033e-05	-0.3035	1	0.983	0.868645	8.26376e-14	-0.283913	1	0.996	1.58449e-09	4.53033e-05	1.65275e-13
Slc7a7	0.0786307	-0.439499	0.276	0.32	1	9.86393e-14	-0.37248	0.039	0.214	1.89131e-09	0.0786307	1.97279e-13
Ndufb9	0.00228022	-0.312636	0.966	0.944	1	9.93136e-14	-0.365501	0.994	0.973	1.90424e-09	0.00228022	1.98627e-13
Atp1a1	8.69389e-08	-1.09933	1	0.941	0.00166697	1.35974e-13	-0.950795	0.985	0.933	2.60716e-09	8.69389e-08	2.71948e-13
Atp5f1	1.03329e-05	-0.322805	1	0.941	0.198122	1.50458e-13	-0.36929	0.988	0.986	2.88488e-09	1.03329e-05	3.00916e-13
Sdha	0.000845562	-0.38383	0.92	0.838	1	1.62169e-13	-0.325447	0.911	0.88	3.10943e-09	0.000845562	3.24338e-13
Lgals3	0.000464837	-0.61486	0.149	0.31	1	1.66199e-13	-0.423086	0.131	0.332	3.1867e-09	0.000464837	3.32398e-13
Neat1	0.0353586	-0.86652	0.471	0.475	1	1.71079e-13	-0.883164	0.39	0.547	3.28026e-09	0.0353586	3.42158e-13
Hgd	0.00193707	-0.363253	0.126	0.267	1	1.97115e-13	-0.374127	0.048	0.222	3.77948e-09	0.00193707	3.9423e-13
Emb	0.118448	-0.388919	0.276	0.304	1	2.35598e-13	-0.468906	0.152	0.344	4.51736e-09	0.118448	4.71196e-13
Slc5a3	0.0431738	-0.259758	0.287	0.36	1	2.6576e-13	-0.405098	0.14	0.321	5.09568e-09	0.0431738	5.3152e-13
Gatm	0.0076736	-0.923211	0.368	0.436	1	2.89332e-13	-1.1587	0.149	0.333	5.54764e-09	0.0076736	5.78663e-13
Ndufa10	0.00564945	-0.269229	0.931	0.875	1	2.9152e-13	-0.352125	0.955	0.903	5.5896e-09	0.00564945	5.83039e-13
Kng2	0.000209118	-0.770313	0.023	0.178	1	3.14682e-13	-0.540022	0.018	0.176	6.03371e-09	0.000209118	6.29364e-13
Pgk1	0.0172017	-0.3277	0.966	0.888	1	3.70732e-13	-0.317543	0.985	0.948	7.10842e-09	0.0172017	7.41464e-13
Cox5a	0.0178863	-0.254756	1	0.944	1	3.71302e-13	-0.490243	0.997	0.973	7.11935e-09	0.0178863	7.42605e-13
Uqcrb	0.000109457	-0.373448	0.977	0.931	1	4.16785e-13	-0.386215	0.991	0.971	7.99144e-09	0.000109457	8.3357e-13
Hoxd11	0.00634346	-0.312814	0.218	0.353	1	6.92886e-13	-0.307701	0.125	0.313	1.32854e-08	0.00634346	1.38577e-12
Ahcyl2	0.0158523	-0.309751	0.506	0.531	1	7.43203e-13	-0.316226	0.443	0.578	1.42502e-08	0.0158523	1.48641e-12
Atp6v1f	1.95192e-06	-0.504935	0.908	0.884	0.0374261	1.27923e-12	-0.32547	0.961	0.932	2.45279e-08	1.95192e-06	2.55845e-12
Clcnkb	2.2223e-05	-0.673585	0.011	0.198	0.426103	1.45166e-12	-0.500634	0.009	0.152	2.78342e-08	2.2223e-05	2.90332e-12
Cisd1	1.08227e-06	-0.490552	0.92	0.855	0.0207515	1.7165e-12	-0.356503	0.949	0.914	3.29121e-08	1.08227e-06	3.433e-12
Atp2b1	1.2134e-05	0.290229	0.954	0.795	0.232657	1.7728e-12	0.26626	0.932	0.793	3.39918e-08	1.2134e-05	3.54561e-12
Iqgap1	0.437333	-0.301558	0.759	0.647	1	2.00283e-12	-0.403779	0.521	0.607	3.84023e-08	0.437333	4.00566e-12
Csad	2.02657e-12	0.457959	0.92	0.601	3.88574e-08	0.335314	-0.34403	0.667	0.567	1	0.335314	4.05314e-12
Ndufb6	0.0629666	-0.274927	0.954	0.835	1	2.7133e-12	-0.34768	0.943	0.902	5.20248e-08	0.0629666	5.4266e-12
Ndufa1	0.000255433	-0.451546	0.885	0.848	1	3.5753e-12	-0.309405	0.818	0.8	6.85527e-08	0.000255433	7.15059e-12
Mgst3	0.456928	-0.265492	0.701	0.64	1	4.28651e-12	-0.385547	0.536	0.629	8.21895e-08	0.456928	8.57302e-12
Pdha1	0.00285342	-0.344653	0.816	0.736	1	4.37771e-12	-0.331059	0.738	0.748	8.39381e-08	0.00285342	8.75541e-12
Cyp2d26	0.417881	-0.667468	0.586	0.363	1	9.94561e-12	-0.737186	0.14	0.31	1.90697e-07	0.417881	1.98912e-11
Ckmt1	5.58362e-06	-0.568399	0.011	0.221	0.10706	1.5228e-11	-0.260944	0.012	0.147	2.91981e-07	5.58362e-06	3.0456e-11
Chd3	0.0620291	-0.252826	0.793	0.703	1	1.57322e-11	-0.310337	0.699	0.746	3.0165e-07	0.0620291	3.14645e-11
Acmsd	0.000340454	-0.525008	0.046	0.201	1	1.6357e-11	-0.325	0.006	0.136	3.13629e-07	0.000340454	3.2714e-11
Cox7b	0.00827637	-0.279917	1	0.924	1	1.98823e-11	-0.364631	0.979	0.958	3.81223e-07	0.00827637	3.97646e-11
Tmem52b	1.80782e-07	-1.45001	0.034	0.3	0.00346632	2.08207e-11	-0.870703	0.042	0.192	3.99217e-07	1.80782e-07	4.16414e-11
Idh3a	0.185153	-0.288745	0.851	0.696	1	2.27194e-11	-0.409119	0.699	0.69	4.35622e-07	0.185153	4.54388e-11
Ndufs1	0.00996952	-0.314767	0.828	0.749	1	2.75892e-11	-0.359952	0.759	0.75	5.28996e-07	0.00996952	5.51785e-11
Crip2	0.148468	-0.306823	0.494	0.462	1	4.26501e-11	-0.334882	0.179	0.347	8.17774e-07	0.148468	8.53003e-11
Uqcrc1	0.00195916	-0.338372	0.977	0.908	1	4.47828e-11	-0.382271	0.973	0.922	8.58666e-07	0.00195916	8.95657e-11
Mpc1	0.00531046	-0.455927	0.885	0.802	1	4.49912e-11	-0.443142	0.905	0.838	8.62662e-07	0.00531046	8.99824e-11
Ndufv2	4.15783e-05	-0.373409	0.954	0.911	0.797222	5.417e-11	-0.307929	0.967	0.94	1.03866e-06	4.15783e-05	1.0834e-10
Mrps6	0.042677	-0.449966	0.713	0.62	1	5.90842e-11	-0.494626	0.542	0.61	1.13288e-06	0.042677	1.18168e-10
Cenpb	0.0730228	-0.303508	0.724	0.7	1	6.53968e-11	-0.274144	0.67	0.703	1.25392e-06	0.0730228	1.30794e-10
Ndrg2	0.0937732	-0.377121	0.276	0.323	1	6.73381e-11	-0.294027	0.086	0.242	1.29114e-06	0.0937732	1.34676e-10
Sod2	0.000344961	-0.456381	0.92	0.888	1	7.82689e-11	-0.356784	0.946	0.933	1.50073e-06	0.000344961	1.56538e-10
Kl	0.540438	-0.404794	0.414	0.353	1	1.2162e-10	-0.428475	0.205	0.361	2.33195e-06	0.540438	2.43241e-10
Dao	2.11663e-10	0.258114	0.839	0.347	4.05842e-06	0.0445507	-0.25715	0.31	0.318	1	0.0445507	4.23326e-10
Slc22a8	0.32613	-0.335975	0.368	0.366	1	2.85408e-10	-0.477979	0.104	0.26	5.47241e-06	0.32613	5.70816e-10
Apoo	0.0137984	-0.312341	0.713	0.647	1	3.61776e-10	-0.32071	0.506	0.585	6.93669e-06	0.0137984	7.23552e-10
Ndufb10	0.00113986	-0.380094	1	0.924	1	3.71011e-10	-0.360834	0.985	0.943	7.11376e-06	0.00113986	7.42021e-10
Ppp1r1a	0.0660045	-0.531996	0.172	0.241	1	5.28992e-10	-0.603045	0.074	0.219	1.01429e-05	0.0660045	1.05798e-09
Basp1	0.0862095	-0.457779	0.506	0.333	1	5.81863e-10	-0.605865	0.271	0.42	1.11566e-05	0.0862095	1.16373e-09
Tns1	0.111234	-0.27092	0.678	0.607	1	8.66452e-10	-0.285385	0.42	0.539	1.66133e-05	0.111234	1.7329e-09
Ctsd	2.77843e-05	-0.482252	0.908	0.838	0.532736	9.65714e-10	-0.318501	0.86	0.831	1.85166e-05	2.77843e-05	1.93143e-09
Ndufs3	0.00010352	-0.36807	0.943	0.865	1	1.09907e-09	-0.309244	0.943	0.893	2.10736e-05	0.00010352	2.19814e-09
Ass1	0.143245	-0.774385	0.816	0.479	1	1.29997e-09	-1.26921	0.289	0.404	2.49256e-05	0.143245	2.59994e-09
Gpx3	0.0605579	-1.38213	0.54	0.512	1	1.85678e-09	-1.35222	0.265	0.407	3.56019e-05	0.0605579	3.71356e-09
Cs	0.00891304	-0.316358	0.736	0.673	1	1.86848e-09	-0.256102	0.577	0.641	3.58262e-05	0.00891304	3.73695e-09
Hoxd8	0.01157	-0.536702	0.322	0.389	1	2.17706e-09	-0.392116	0.28	0.404	4.17429e-05	0.01157	4.35411e-09
Atp5j2	8.16207e-05	-0.2766	0.989	0.947	1	2.42884e-09	-0.250702	0.997	0.976	4.65707e-05	8.16207e-05	4.85769e-09
Pdzk1ip1	0.0146845	-0.663743	0.793	0.683	1	4.25739e-09	-0.681284	0.643	0.68	8.16311e-05	0.0146845	8.51477e-09
Tst	4.6638e-09	0.311334	0.989	0.558	8.94236e-05	0.202227	-0.336096	0.78	0.571	1	0.202227	9.32759e-09
Hoxd9	0.069449	-0.343084	0.368	0.38	1	4.89066e-09	-0.308491	0.262	0.39	9.37735e-05	0.069449	9.78132e-09
Miox	0.000908078	-1.01044	0.115	0.264	1	5.15879e-09	-0.47452	0.012	0.118	9.89146e-05	0.000908078	1.03176e-08
Higd1a	0.0846897	-0.252228	0.839	0.739	1	5.81047e-09	-0.315356	0.789	0.778	0.00011141	0.0846897	1.16209e-08
Atp6v0e	0.0558234	-0.40259	0.92	0.822	1	6.87463e-09	-0.35319	0.926	0.89	0.000131814	0.0558234	1.37493e-08
AY036118	0.00439015	-0.556992	0.989	0.947	1	1.89107e-08	-0.373604	0.958	0.948	0.000362594	0.00439015	3.78214e-08
Slc22a1	0.331678	-0.429795	0.563	0.356	1	2.38536e-08	-0.428866	0.158	0.293	0.000457368	0.331678	4.77071e-08
mt-Co2	0.00334837	-0.434051	1	0.983	1	2.75859e-08	-0.320148	0.997	0.993	0.000528932	0.00334837	5.51718e-08
Car4	3.50906e-08	0.27285	0.908	0.512	0.000672827	1.19494e-07	-0.319854	0.449	0.552	0.00229119	1.19494e-07	7.01812e-08
Cd9	0.394974	-0.434432	0.655	0.538	1	4.39444e-08	-0.362309	0.292	0.42	0.000842589	0.394974	8.78887e-08
Atp6v1e1	0.00381347	-0.417746	0.92	0.848	1	5.21428e-08	-0.369047	0.964	0.886	0.000999786	0.00381347	1.04286e-07
mt-Atp6	0.013195	-0.393301	1	0.997	1	5.45788e-08	-0.312982	1	1	0.00104649	0.013195	1.09158e-07
Map1b	0.419766	-0.317882	0.368	0.267	1	5.69635e-08	-0.363894	0.193	0.335	0.00109222	0.419766	1.13927e-07
Macrod2	0.136046	-0.311114	0.529	0.502	1	6.074e-08	-0.313366	0.31	0.414	0.00116463	0.136046	1.2148e-07
Pdgfa	0.56431	-0.404273	0.747	0.531	1	8.84785e-08	-0.859418	0.613	0.605	0.00169649	0.56431	1.76957e-07
Cldn10	0.044268	-0.314323	0.747	0.472	1	1.17592e-07	-0.814687	0.363	0.439	0.0022547	0.044268	2.35183e-07
Got2	0.00199659	-0.409356	0.931	0.802	1	1.32284e-07	-0.332572	0.884	0.831	0.00253642	0.00199659	2.64568e-07
Pcx	0.227028	-0.6234	0.506	0.449	1	1.6993e-07	-0.610234	0.256	0.356	0.00325824	0.227028	3.39861e-07
Sec14l1	0.160307	-0.437982	0.437	0.422	1	1.73047e-07	-0.32905	0.241	0.362	0.003318	0.160307	3.46093e-07
Fabp3	0.00887692	-0.573415	0.747	0.719	1	3.32501e-07	-0.637185	0.583	0.611	0.00637538	0.00887692	6.65003e-07
Ogdh	0.0510451	-0.260483	0.759	0.653	1	3.60656e-07	-0.2881	0.533	0.574	0.00691523	0.0510451	7.21313e-07
Fmo2	0.471785	-0.290786	0.345	0.251	1	3.68235e-07	-0.410346	0.134	0.252	0.00706054	0.471785	7.3647e-07
Spink1	4.23406e-07	0.387242	0.885	0.482	0.00811839	0.0713169	-0.297499	0.58	0.429	1	0.0713169	8.46813e-07
Akr1b3	0.38966	-0.260289	0.494	0.472	1	4.33967e-07	-0.287514	0.268	0.385	0.00832088	0.38966	8.67933e-07
Acaa2	0.000301751	-0.700012	0.713	0.693	1	5.22926e-07	-0.378207	0.667	0.669	0.0100266	0.000301751	1.04585e-06
Gsta2	0.868628	-0.442392	0.483	0.366	1	1.16095e-06	-0.699711	0.253	0.35	0.02226	0.868628	2.3219e-06
Fuca2	0.326238	-0.333104	0.667	0.594	1	2.84439e-06	-0.309098	0.542	0.595	0.0545384	0.326238	5.68877e-06
Cyp2j5	0.401664	-0.462318	0.299	0.29	1	3.57159e-06	-0.794194	0.244	0.331	0.0684818	0.401664	7.14318e-06
Car2	0.955379	-0.431467	0.667	0.521	1	7.11847e-06	-0.623591	0.369	0.453	0.13649	0.955379	1.42369e-05
Atp1b1	0.000612418	-0.831052	1	0.934	1	8.96329e-06	-0.588938	0.997	0.939	0.171862	0.000612418	1.79265e-05
Mt1	1.16287e-05	-1.42377	0.713	0.703	0.222969	0.48805	0.340533	0.637	0.603	1	0.48805	2.32573e-05
Gm1673	0.469469	-0.290587	0.724	0.568	1	1.1748e-05	-0.282154	0.571	0.571	0.225257	0.469469	2.34959e-05
Pax2	0.948691	-0.254748	0.552	0.446	1	1.76045e-05	-0.28567	0.438	0.49	0.337548	0.948691	3.52087e-05
Hbegf	0.576907	-0.258164	0.391	0.363	1	2.72134e-05	-0.316531	0.268	0.369	0.521789	0.576907	5.4426e-05
mt-Cytb	0.0687173	-0.361723	1	0.983	1	3.94071e-05	-0.271398	1	0.985	0.755592	0.0687173	7.88126e-05
Ier3	0.457843	-0.420721	0.322	0.31	1	3.9758e-05	-0.275663	0.193	0.293	0.762319	0.457843	7.95144e-05
Mgst1	0.781489	-0.473475	0.621	0.485	1	7.29921e-05	-0.507907	0.542	0.541	1	0.781489	0.000145979
Sfrp1	0.00522398	-0.583439	0.195	0.327	1	7.359e-05	-0.365147	0.095	0.181	1	0.00522398	0.000147175
Slc22a2	0.47149	-0.338804	0.448	0.323	1	0.000128272	-0.58333	0.265	0.322	1	0.47149	0.000256528
Pkm	0.00699614	-0.539086	0.943	0.799	1	0.000166855	-0.313055	0.979	0.85	1	0.00699614	0.000333683
Tubb2a	0.483386	-0.278268	0.552	0.521	1	0.000177955	-0.309491	0.345	0.431	1	0.483386	0.000355878
Akap12	0.0892319	-0.375454	0.23	0.31	1	0.000198675	-0.511803	0.164	0.25	1	0.0892319	0.000397311
Ftl1	0.0587035	-0.440769	1	0.997	1	0.000216302	-0.304022	1	1	1	0.0587035	0.000432558
Lars2	0.00610863	-0.509809	0.805	0.762	1	0.000382529	-0.310397	0.75	0.712	1	0.00610863	0.000764911
Slc3a1	0.499426	-0.369718	0.483	0.33	1	0.000430073	-0.457119	0.265	0.317	1	0.499426	0.000859961
mt-Nd2	0.0311803	-0.396828	1	0.983	1	0.000474439	-0.25319	1	0.995	1	0.0311803	0.000948652
Umod	0.112687	-0.393118	0.069	0.125	1	0.000545118	-0.713909	0.119	0.192	1	0.112687	0.00108994
Chka	0.520344	-0.313705	0.609	0.554	1	0.00121186	-0.283072	0.494	0.509	1	0.520344	0.00242225
Tcn2	0.0780825	-0.276785	0.874	0.677	1	0.00137165	-0.567817	0.774	0.724	1	0.0780825	0.00274142
4833439L19Rik	0.00814999	-0.35025	0.713	0.69	1	0.00154302	-0.256612	0.664	0.626	1	0.00814999	0.00308366
Cdkn1c	0.00157682	0.844506	0.839	0.663	1	0.0241631	-0.584037	0.542	0.537	1	0.0241631	0.00315115
Lrp2	0.00221623	-0.265263	0.966	0.568	1	0.0296095	-0.52616	0.705	0.48	1	0.0296095	0.00442755
4931406C07Rik	0.966951	-0.74442	0.782	0.601	1	0.00485325	-0.312205	0.827	0.644	1	0.966951	0.00968294
Slc34a1	0.0456762	-0.436373	0.805	0.439	1	0.00731787	-1.21567	0.426	0.399	1	0.0456762	0.0145822
Slc22a6	0.243249	-0.492426	0.621	0.389	1	0.00906922	-0.323059	0.607	0.395	1	0.243249	0.0180562
Fxyd2	0.0421734	-0.477949	1	0.848	1	0.0146972	-0.694589	0.949	0.824	1	0.0421734	0.0291783
Dcxr	0.803763	-0.287675	0.713	0.561	1	0.0188419	-0.34225	0.601	0.55	1	0.803763	0.0373287
Slc4a4	0.194815	-0.459205	0.747	0.485	1	0.0308599	-0.493811	0.509	0.467	1	0.194815	0.0607675
Tagln	0.0441851	0.276491	0.264	0.162	1	0.246283	-0.266286	0.128	0.148	1	0.246283	0.0864179
Sostdc1	0.715978	-0.74299	0.793	0.657	1	0.0671971	-0.511426	0.833	0.68	1	0.715978	0.129879
S100g	0.958978	-2.96062	0.425	0.343	1	0.100073	-2.26603	0.265	0.288	1	0.958978	0.190131
Sord	0.549494	-0.444448	0.586	0.482	1	0.101827	-0.273452	0.429	0.408	1	0.549494	0.193286
Meg3	0.355569	-0.709761	0.356	0.284	1	0.111848	-0.826468	0.17	0.199	1	0.355569	0.211185
Cryab	0.147327	-0.853581	0.276	0.185	1	0.501125	-0.880843	0.164	0.17	1	0.501125	0.272949
Cela1	0.151507	-0.717452	0.54	0.485	1	0.168105	-0.422131	0.396	0.378	1	0.168105	0.28006
Gm10639	0.406	-0.555931	0.655	0.422	1	0.154075	-0.501402	0.384	0.362	1	0.406	0.284411
Ccnd1	0.20256	-0.612847	0.655	0.482	1	0.5841	-0.345591	0.571	0.51	1	0.5841	0.364089
Nus1	0.780575	-0.259299	0.736	0.611	1	0.214715	-0.322825	0.717	0.614	1	0.780575	0.383327
Fbp1	0.222777	-0.593811	0.644	0.386	1	0.947141	-0.903067	0.583	0.42	1	0.947141	0.395924
Tuba1a	0.232	-0.481264	0.69	0.525	1	0.708019	-0.252562	0.494	0.438	1	0.708019	0.410177
Tfcp2l1	0.288539	-0.399735	0.644	0.584	1	0.245849	-0.372512	0.637	0.535	1	0.288539	0.431256
Nat8f1	0.257445	-0.679647	0.713	0.465	1	0.964174	-0.483744	0.628	0.522	1	0.964174	0.448613
Tspo	0.920879	-0.367343	0.713	0.538	1	0.421553	-0.251612	0.637	0.547	1	0.920879	0.665399
Spp2	0.44598	-1.23206	0.69	0.436	1	0.46386	-1.33689	0.539	0.42	1	0.46386	0.693062
Hes1	0.949623	-0.251829	0.552	0.446	1	0.452266	-0.267677	0.464	0.431	1	0.949623	0.699987

## Sheet: N.tubule.2_AHL.Mut.CTRL.marker
Gene	Mutant_p_val	Mutant_avg_logFC	Mutant_pct.1	Mutant_pct.2	Mutant_p_val_adj	CTRL_p_val	CTRL_avg_logFC	CTRL_pct.1	CTRL_pct.2	CTRL_p_val_adj	max_pval	minimump_p_val
Tfap2b	3.30378e-48	1.4765	0.898	0.088	6.33467e-44	5.62234e-158	1.48398	0.913	0.051	1.07803e-153	3.30378e-48	1.12447e-157
Mal	2.48004e-34	1.27234	0.966	0.187	4.75523e-30	2.87886e-139	1.81369	0.967	0.091	5.51993e-135	2.48004e-34	5.75772e-139
Slc12a1	1.52074e-21	1.53431	0.559	0.079	2.91587e-17	9.52162e-131	2.73108	0.753	0.037	1.82568e-126	1.52074e-21	1.90432e-130
Shd	7.27634e-27	0.527953	0.712	0.115	1.39516e-22	1.89562e-127	0.870903	0.8	0.051	3.63467e-123	7.27634e-27	3.79125e-127
Tmem72	5.00818e-41	0.84321	0.729	0.051	9.60268e-37	9.36661e-120	0.736502	0.713	0.033	1.79595e-115	5.00818e-41	1.87332e-119
Wfdc15b	1.89912e-30	0.869483	0.814	0.142	3.64137e-26	6.00356e-118	1.26791	0.947	0.113	1.15112e-113	1.89912e-30	1.20071e-117
Mecom	1.36379e-36	1.35089	0.915	0.202	2.61494e-32	9.1079e-118	1.40793	0.987	0.175	1.74635e-113	1.36379e-36	1.82158e-117
Tesc	3.45305e-20	0.394246	0.458	0.048	6.62087e-16	3.02817e-107	0.963656	0.72	0.046	5.80622e-103	3.45305e-20	6.05635e-107
Tmem213	2.86549e-28	1.20866	0.847	0.166	5.49429e-24	7.75103e-101	1.56088	0.833	0.099	1.48618e-96	2.86549e-28	1.55021e-100
Cldn19	3.84612e-36	0.789539	0.797	0.097	7.37455e-32	7.81449e-101	0.94017	0.7	0.055	1.49835e-96	3.84612e-36	1.5629e-100
Muc1	1.41832e-16	0.271215	0.424	0.054	2.71949e-12	1.04577e-92	0.479223	0.6	0.034	2.00516e-88	1.41832e-16	2.09154e-92
Fam81a	1.35032e-29	0.577341	0.712	0.109	2.58911e-25	1.08785e-89	0.700888	0.84	0.138	2.08584e-85	1.35032e-29	2.17569e-89
Syt17	2.13815e-14	0.292442	0.441	0.079	4.09969e-10	1.5022e-89	0.368201	0.547	0.024	2.88032e-85	2.13815e-14	3.00441e-89
Emb	6.84524e-33	0.844184	0.881	0.193	1.31251e-28	1.92479e-89	1.13614	0.893	0.185	3.6906e-85	6.84524e-33	3.84958e-89
Clcnkb	1.46291e-26	1.03726	0.627	0.073	2.80498e-22	9.48488e-89	1.18357	0.573	0.031	1.81863e-84	1.46291e-26	1.89698e-88
Gm13111	1.5875e-34	0.458807	0.576	0.03	3.04388e-30	4.15082e-87	0.378193	0.493	0.016	7.95879e-83	1.5875e-34	8.30164e-87
Wfdc2	1.318e-25	1.16642	1	0.535	2.52713e-21	6.01415e-85	1.62847	0.973	0.302	1.15315e-80	1.318e-25	1.20283e-84
Clcnka	1.56136e-20	0.331532	0.525	0.069	2.99376e-16	1.04453e-84	0.670904	0.507	0.022	2.00279e-80	1.56136e-20	2.08906e-84
Kng2	7.57041e-29	1.35695	0.61	0.06	1.45155e-24	1.07878e-82	1.32243	0.6	0.049	2.06845e-78	7.57041e-29	2.15756e-82
Kcnj1	4.28137e-35	0.808344	0.678	0.051	8.2091e-31	8.30474e-79	0.627263	0.473	0.018	1.59235e-74	4.28137e-35	1.66095e-78
Hoxd8	5.36401e-27	0.836031	0.898	0.281	1.0285e-22	5.73571e-77	0.895496	0.913	0.276	1.09976e-72	5.36401e-27	1.14714e-76
Hk1	3.61525e-24	0.578187	0.729	0.154	6.93188e-20	9.28575e-76	0.57747	0.693	0.093	1.78045e-71	3.61525e-24	1.85715e-75
Slc5a3	5.24406e-19	0.705195	0.763	0.269	1.0055e-14	4.88041e-75	0.968384	0.8	0.177	9.35771e-71	5.24406e-19	9.76083e-75
Fgf9	4.84243e-13	0.395704	0.441	0.097	9.28487e-09	1.47358e-72	0.570632	0.607	0.066	2.82543e-68	4.84243e-13	2.94715e-72
Nudt4	5.95976e-22	1.14511	0.983	0.698	1.14272e-17	2.16759e-72	1.76811	0.98	0.59	4.15614e-68	5.95976e-22	4.33518e-72
Ckmt1	1.61719e-16	0.430874	0.559	0.106	3.1008e-12	3.51524e-72	0.573503	0.52	0.037	6.74012e-68	1.61719e-16	7.03048e-72
Prdm16	2.79228e-10	0.256146	0.407	0.094	5.35391e-06	4.67405e-72	0.391589	0.547	0.047	8.96202e-68	2.79228e-10	9.3481e-72
Cyfip2	5.86245e-30	0.624314	0.78	0.145	1.12407e-25	5.05953e-70	0.70401	0.747	0.137	9.70115e-66	5.86245e-30	1.01191e-69
Dusp9	4.91911e-16	0.556467	0.695	0.23	9.4319e-12	6.28486e-69	1.03067	0.8	0.176	1.20506e-64	4.91911e-16	1.25697e-68
Sostdc1	6.0866e-24	1.75119	0.966	0.637	1.16704e-19	5.09606e-68	1.93671	0.987	0.686	9.77119e-64	6.0866e-24	1.01921e-67
Gstt3	1.10511e-20	0.455374	0.627	0.139	2.11894e-16	7.25291e-68	0.535785	0.753	0.145	1.39067e-63	1.10511e-20	1.45058e-67
Cd164l2	2.50474e-12	0.299993	0.525	0.145	4.8026e-08	4.41435e-67	0.452922	0.64	0.089	8.46407e-63	2.50474e-12	8.82869e-67
Mgst1	1.32788e-16	0.778554	0.881	0.45	2.54608e-12	8.49376e-67	1.17021	0.987	0.469	1.62859e-62	1.32788e-16	1.69875e-66
Tox3	7.58479e-13	0.536932	0.593	0.196	1.45431e-08	1.06351e-65	0.67079	0.653	0.093	2.03917e-61	7.58479e-13	2.12702e-65
Neat1	1.46134e-17	1.29327	0.864	0.405	2.80198e-13	4.45056e-65	1.55193	0.947	0.425	8.5335e-61	1.46134e-17	8.90111e-65
Lgals3	4.56659e-15	0.336355	0.712	0.196	8.75599e-11	3.41817e-63	0.777305	0.82	0.179	6.55401e-59	4.56659e-15	6.83635e-63
Atp1a1	3.46286e-13	1.14119	1	0.946	6.63969e-09	1.04174e-62	1.50753	1	0.941	1.99744e-58	3.46286e-13	2.08349e-62
Atp1b1	4.08791e-13	1.00622	1	0.94	7.83816e-09	5.65709e-62	1.24856	0.993	0.951	1.08469e-57	4.08791e-13	1.13142e-61
Fstl1	3.06157e-21	0.884759	1	0.508	5.87026e-17	1.01021e-61	1.08796	0.987	0.45	1.93698e-57	3.06157e-21	2.02042e-61
Ndrg2	2.05827e-13	0.4278	0.678	0.248	3.94653e-09	4.40318e-60	0.651632	0.647	0.119	8.44266e-56	2.05827e-13	8.80636e-60
Kctd1	1.55624e-17	0.442713	0.661	0.178	2.98393e-13	1.03975e-58	0.460719	0.653	0.122	1.99362e-54	1.55624e-17	2.0795e-58
Hoxd10	3.29363e-13	0.28495	0.542	0.157	6.31522e-09	5.17481e-58	0.417363	0.66	0.123	9.92218e-54	3.29363e-13	1.03496e-57
Limch1	1.92191e-11	0.302072	0.576	0.193	3.68507e-07	1.43943e-57	0.3976	0.567	0.077	2.75997e-53	1.92191e-11	2.87887e-57
Sall3	5.27102e-17	0.419939	0.441	0.063	1.01066e-12	1.46981e-57	0.426832	0.36	0.016	2.81822e-53	5.27102e-17	2.93962e-57
Iqgap1	5.55997e-16	0.559196	0.966	0.619	1.06607e-11	8.12441e-57	0.740745	0.973	0.516	1.55778e-52	5.55997e-16	1.62488e-56
Hoxd11	2.75134e-12	0.424499	0.695	0.257	5.27543e-08	1.02644e-56	0.679816	0.733	0.176	1.9681e-52	2.75134e-12	2.05289e-56
Fam107a	1.84924e-21	0.348889	0.441	0.042	3.54573e-17	2.70599e-56	0.348728	0.393	0.025	5.18846e-52	1.84924e-21	5.41197e-56
Gpx6	1.025e-18	0.489948	0.39	0.036	1.96534e-14	9.24548e-56	0.388769	0.32	0.01	1.77273e-51	1.025e-18	1.8491e-55
Rab25	4.17098e-13	0.364114	0.593	0.187	7.99743e-09	1.11067e-55	0.540254	0.78	0.205	2.12959e-51	4.17098e-13	2.22133e-55
Ppp1r1a	1.59976e-19	0.967661	0.644	0.151	3.06737e-15	1.74886e-55	1.10976	0.6	0.104	3.35326e-51	1.59976e-19	3.49771e-55
Vav3	6.68994e-25	0.399312	0.542	0.057	1.28273e-20	3.29426e-55	0.319816	0.453	0.041	6.31641e-51	6.68994e-25	6.58852e-55
Ephb3	4.08852e-24	0.394699	0.542	0.063	7.83932e-20	4.33351e-55	0.260088	0.353	0.017	8.30907e-51	4.08852e-24	8.66701e-55
Pycard	4.48978e-14	0.648586	0.847	0.486	8.6087e-10	4.75036e-55	0.766604	0.873	0.356	9.10835e-51	4.48978e-14	9.50073e-55
Apoc1	1.32406e-17	0.446389	0.407	0.045	2.53876e-13	1.05214e-54	0.436603	0.373	0.022	2.01738e-50	1.32406e-17	2.10428e-54
Calml4	8.7146e-16	-1.90731	0.305	0.749	1.67094e-11	2.42407e-54	-2.27909	0.227	0.837	4.64791e-50	8.7146e-16	4.84814e-54
Mrps6	3.59626e-13	0.719317	0.847	0.604	6.89546e-09	2.48409e-54	1.0156	0.92	0.534	4.76299e-50	3.59626e-13	4.96817e-54
Cpn1	3.2358e-16	-1.22958	0.153	0.713	6.20433e-12	4.44358e-54	-1.32239	0.267	0.852	8.52012e-50	3.2358e-16	8.88716e-54
Tspo	4.73626e-18	0.875849	0.898	0.52	9.08131e-14	1.59751e-53	0.715488	0.953	0.514	3.06306e-49	4.73626e-18	3.19501e-53
Kcnk1	4.07924e-22	0.513142	0.746	0.19	7.82153e-18	1.6617e-53	0.481824	0.7	0.149	3.18614e-49	4.07924e-22	3.3234e-53
Hoxd9	1.05061e-19	0.653185	0.814	0.299	2.01443e-15	1.79146e-51	0.653163	0.82	0.274	3.43495e-47	1.05061e-19	3.58293e-51
Cdkl1	5.20451e-12	0.484877	0.898	0.486	9.97912e-08	2.07126e-50	0.752158	0.92	0.376	3.97144e-46	5.20451e-12	4.14252e-50
Cxcl12	1.67224e-12	0.833502	0.61	0.239	3.20635e-08	2.90624e-50	0.811075	0.627	0.142	5.57242e-46	1.67224e-12	5.81247e-50
Slc16a7	2.11199e-25	0.576284	0.576	0.066	4.04953e-21	2.98757e-50	0.426031	0.46	0.053	5.72836e-46	2.11199e-25	5.97514e-50
Tfcp2l1	4.3459e-15	0.66626	0.881	0.547	8.33283e-11	5.53615e-50	0.840441	0.927	0.508	1.0615e-45	4.3459e-15	1.10723e-49
Ppargc1a	7.62315e-09	0.431399	0.712	0.435	0.000146166	9.91903e-50	0.75412	0.813	0.287	1.90188e-45	7.62315e-09	1.98381e-49
Prdx5	1.69482e-12	0.931858	0.983	0.873	3.24964e-08	1.26222e-49	1.02081	1	0.931	2.42019e-45	1.69482e-12	2.52445e-49
Efhd1	3.96275e-13	0.398513	0.542	0.154	7.59817e-09	2.84352e-49	0.67896	0.747	0.213	5.45216e-45	3.96275e-13	5.68703e-49
Pkdcc	1.28455e-13	0.691364	0.864	0.526	2.46299e-09	1.61225e-48	0.85389	0.82	0.342	3.09132e-44	1.28455e-13	3.2245e-48
Pantr1	8.38372e-16	0.546667	0.814	0.353	1.60749e-11	2.23633e-48	0.85296	0.953	0.54	4.28794e-44	8.38372e-16	4.47266e-48
Rida	3.16664e-12	-1.41113	0.695	0.813	6.07172e-08	4.99757e-48	-1.53343	0.847	0.937	9.58235e-44	3.16664e-12	9.99515e-48
Gstt1	6.49686e-14	0.329971	0.508	0.115	1.24571e-09	1.80296e-47	0.433451	0.633	0.144	3.45699e-43	6.49686e-14	3.60592e-47
Eva1a	8.9892e-14	0.575625	0.831	0.468	1.72359e-09	4.78159e-47	0.813453	0.92	0.478	9.16823e-43	8.9892e-14	9.56319e-47
Ptpn18	4.15029e-17	0.460204	0.627	0.16	7.95777e-13	4.81155e-47	0.461444	0.593	0.123	9.22566e-43	4.15029e-17	9.6231e-47
Sfrp1	1.69799e-21	1.07061	0.763	0.215	3.25572e-17	2.54226e-46	1.06387	0.52	0.094	4.87453e-42	1.69799e-21	5.08452e-46
Sec14l1	8.7053e-08	0.561329	0.644	0.387	0.00166915	4.00597e-46	0.864233	0.747	0.255	7.68105e-42	8.7053e-08	8.01194e-46
Csrp2	6.43231e-08	-0.638063	0.78	0.807	0.00123333	4.67436e-46	-1.11684	0.567	0.903	8.96262e-42	6.43231e-08	9.34873e-46
Npnt	4.05712e-15	-1.30952	0.492	0.804	7.77912e-11	2.31946e-45	-1.35802	0.487	0.863	4.44733e-41	4.05712e-15	4.63892e-45
Mt2	4.06992e-13	0.791006	0.814	0.378	7.80366e-09	2.67497e-45	0.951648	0.707	0.202	5.12899e-41	4.06992e-13	5.34995e-45
Wscd1	9.17404e-15	0.285698	0.424	0.069	1.75903e-10	7.93408e-45	0.327722	0.393	0.04	1.52128e-40	9.17404e-15	1.58682e-44
Hmgn3	2.14235e-14	0.43311	0.729	0.317	4.10774e-10	2.50564e-44	0.37581	0.66	0.168	4.80431e-40	2.14235e-14	5.01127e-44
Cd9	7.79951e-14	0.422119	0.881	0.508	1.49548e-09	3.49854e-44	0.626687	0.84	0.305	6.70811e-40	7.79951e-14	6.99709e-44
Phgdh	6.59364e-14	-1.42212	0.695	0.843	1.26426e-09	4.07469e-44	-1.68679	0.647	0.873	7.81282e-40	6.59364e-14	8.14939e-44
St14	1.7225e-14	0.300448	0.644	0.205	3.30272e-10	4.23439e-44	0.312122	0.573	0.116	8.11901e-40	1.7225e-14	8.46877e-44
Cotl1	5.64221e-11	-0.84921	0.525	0.782	1.08184e-06	5.95585e-44	-0.944727	0.52	0.859	1.14198e-39	5.64221e-11	1.19117e-43
Myo10	8.18899e-09	0.274897	0.61	0.281	0.000157016	9.30909e-44	0.552793	0.747	0.245	1.78492e-39	8.18899e-09	1.86182e-43
Tmed6	9.82865e-10	0.312155	0.559	0.221	1.88454e-05	9.87112e-44	0.411418	0.673	0.173	1.89269e-39	9.82865e-10	1.97422e-43
Col4a4	2.6096e-09	0.283321	0.441	0.118	5.00365e-05	1.50258e-43	0.439355	0.5	0.084	2.88105e-39	2.6096e-09	3.00517e-43
Tmem52b	4.71498e-17	1.16961	0.661	0.166	9.04051e-13	2.23637e-43	1.32072	0.5	0.087	4.28802e-39	4.71498e-17	4.47275e-43
Fut9	4.67308e-14	-1.25333	0.051	0.604	8.96016e-10	9.61597e-43	-1.03168	0.033	0.687	1.84377e-38	4.67308e-14	1.92319e-42
Abcg2	1.50399e-14	-0.985555	0.22	0.707	2.88376e-10	1.15081e-42	-1.08431	0.153	0.739	2.20656e-38	1.50399e-14	2.30162e-42
Cldn3	1.74086e-14	0.327976	0.576	0.148	3.33793e-10	1.57437e-42	0.429667	0.62	0.139	3.01869e-38	1.74086e-14	3.14873e-42
Cldn16	5.61283e-25	0.386593	0.458	0.03	1.0762e-20	2.94197e-42	0.431006	0.333	0.029	5.64093e-38	5.61283e-25	5.88393e-42
Dab2	3.37594e-15	-1.14915	0.119	0.674	6.47303e-11	2.9467e-42	-1.00228	0.14	0.738	5.65001e-38	3.37594e-15	5.89341e-42
Wnk4	1.09558e-05	0.306577	0.458	0.227	0.210067	3.35443e-42	0.458076	0.613	0.151	6.43178e-38	1.09558e-05	6.70885e-42
Ctsc	6.21603e-09	0.291004	0.492	0.169	0.000119186	1.74241e-41	0.385408	0.613	0.147	3.3409e-37	6.21603e-09	3.48482e-41
Crip2	6.20867e-10	0.406468	0.746	0.42	1.19045e-05	8.72434e-41	0.523588	0.713	0.226	1.67281e-36	6.20867e-10	1.74487e-40
F2rl1	9.0058e-17	0.270739	0.475	0.082	1.72677e-12	9.57744e-41	0.275816	0.5	0.087	1.83638e-36	9.0058e-17	1.91549e-40
Esd	4.12859e-10	-0.747408	0.949	0.912	7.91615e-06	1.7272e-40	-0.7654	0.98	0.98	3.31174e-36	4.12859e-10	3.4544e-40
Tmem27	2.04284e-17	-1.47575	0.085	0.71	3.91694e-13	2.94783e-40	-1.38962	0.16	0.731	5.65218e-36	2.04284e-17	5.89567e-40
Pdzk1	5.28182e-17	-1.79002	0.102	0.704	1.01274e-12	3.78089e-40	-1.80272	0.087	0.687	7.24948e-36	5.28182e-17	7.56178e-40
Aldoa	1.09128e-11	0.559528	1	0.934	2.09242e-07	4.263e-40	0.740455	1	0.978	8.17387e-36	1.09128e-11	8.526e-40
Thnsl2	1.21381e-12	-0.704937	0.085	0.589	2.32735e-08	5.11489e-40	-0.891	0.093	0.693	9.80729e-36	1.21381e-12	1.02298e-39
Nrp1	2.45368e-10	0.39163	0.61	0.251	4.70469e-06	6.06426e-40	0.413824	0.653	0.175	1.16276e-35	2.45368e-10	1.21285e-39
Tmem176b	2.15687e-10	-0.923016	0.932	0.9	4.13558e-06	1.4365e-39	-1.43578	0.987	0.973	2.75435e-35	2.15687e-10	2.873e-39
Shmt1	3.90683e-11	0.429549	0.695	0.384	7.49095e-07	2.30318e-39	0.51635	0.787	0.357	4.41612e-35	3.90683e-11	4.60636e-39
Idh2	4.56688e-08	0.562014	0.983	0.855	0.000875653	4.10161e-39	0.693002	1	0.94	7.86443e-35	4.56688e-08	8.20322e-39
Zmiz1	2.63215e-15	0.585999	0.864	0.502	5.04688e-11	9.75346e-39	0.602771	0.907	0.547	1.87013e-34	2.63215e-15	1.95069e-38
Rragd	4.9356e-13	0.263133	0.593	0.169	9.46352e-09	5.74585e-38	0.409815	0.76	0.253	1.10171e-33	4.9356e-13	1.14917e-37
Slc43a2	2.39761e-08	0.300767	0.525	0.208	0.000459717	5.91751e-38	0.264765	0.48	0.084	1.13462e-33	2.39761e-08	1.1835e-37
Itga6	4.08955e-09	0.437912	0.864	0.686	7.84131e-05	6.76829e-38	0.75538	0.953	0.682	1.29775e-33	4.08955e-09	1.35366e-37
Atp6v1f	1.32542e-06	0.45176	0.949	0.879	0.0254135	1.81166e-37	0.651061	0.993	0.933	3.47368e-33	1.32542e-06	3.62333e-37
Npb	7.11465e-13	0.409699	0.61	0.184	1.36416e-08	2.70053e-37	0.535595	0.447	0.076	5.17801e-33	7.11465e-13	5.40107e-37
Pdgfa	1.45024e-08	0.301545	0.78	0.544	0.000278069	5.62623e-37	0.772657	0.92	0.557	1.07877e-32	1.45024e-08	1.12525e-36
Camk2d	3.56747e-10	0.509966	0.678	0.32	6.84027e-06	6.18596e-37	0.464094	0.72	0.256	1.1861e-32	3.56747e-10	1.23719e-36
Frmd4a	2.06729e-09	0.468874	0.661	0.341	3.96382e-05	6.29144e-37	0.599656	0.707	0.263	1.20632e-32	2.06729e-09	1.25829e-36
Cdo1	1.05389e-07	0.36345	0.525	0.233	0.00202074	7.15095e-37	0.491333	0.553	0.134	1.37112e-32	1.05389e-07	1.43019e-36
Keg1	1.46097e-13	-1.11344	0.068	0.607	2.80127e-09	2.66245e-36	-1.19123	0.053	0.633	5.10499e-32	1.46097e-13	5.3249e-36
Pttg1	1.98818e-12	0.43323	0.797	0.453	3.81214e-08	2.75318e-36	0.497387	0.953	0.608	5.27896e-32	1.98818e-12	5.50637e-36
Acaa2	6.90326e-18	0.698696	0.983	0.647	1.32363e-13	5.3329e-36	0.735426	0.933	0.625	1.02253e-31	6.90326e-18	1.06658e-35
Pter	1.37817e-09	-0.889782	0.22	0.601	2.64251e-05	1.05747e-35	-1.06235	0.14	0.679	2.02759e-31	1.37817e-09	2.11494e-35
Stard10	1.03941e-10	-0.588202	0.78	0.84	1.99296e-06	3.00612e-35	-0.753416	0.78	0.897	5.76393e-31	1.03941e-10	6.01223e-35
Glul	8.94925e-11	-0.622621	0.288	0.704	1.71593e-06	3.43299e-35	-0.949046	0.193	0.694	6.58242e-31	8.94925e-11	6.86599e-35
Lamb1	1.09279e-11	0.698717	0.915	0.77	2.09531e-07	6.72637e-35	0.662	0.98	0.837	1.28971e-30	1.09279e-11	1.34527e-34
Ddah1	1.94851e-11	-0.798991	0.576	0.795	3.73608e-07	8.32964e-35	-0.793582	0.647	0.891	1.59712e-30	1.94851e-11	1.66593e-34
Ankrd9	8.24637e-12	0.256616	0.525	0.151	1.58116e-07	9.73834e-35	0.261694	0.513	0.119	1.86723e-30	8.24637e-12	1.94767e-34
Sdc4	2.72104e-12	0.605867	0.949	0.746	5.21732e-08	1.76315e-34	0.673433	0.993	0.863	3.38067e-30	2.72104e-12	3.52631e-34
Pygl	2.08524e-07	0.344023	0.644	0.366	0.00399824	2.69368e-34	0.518273	0.733	0.308	5.16486e-30	2.08524e-07	5.38736e-34
Amn	8.47473e-11	-1.20305	0.237	0.616	1.62494e-06	2.75699e-34	-1.22172	0.12	0.651	5.28625e-30	8.47473e-11	5.51398e-34
Gk	1.51102e-07	-0.647761	0.305	0.577	0.00289723	1.09812e-33	-0.849888	0.313	0.722	2.10554e-29	1.51102e-07	2.19624e-33
Pik3r1	1.21205e-05	0.405015	0.61	0.378	0.232398	1.66063e-33	0.446263	0.673	0.253	3.18409e-29	1.21205e-05	3.32126e-33
Hint1	9.80687e-08	-0.382262	0.983	0.934	0.00188037	2.31168e-33	-0.54364	0.993	0.977	4.43242e-29	9.80687e-08	4.62336e-33
Bdh2	2.40347e-08	-0.439469	0.119	0.492	0.000460841	5.79271e-33	-0.817646	0.26	0.737	1.11069e-28	2.40347e-08	1.15854e-32
Umod	1.77346e-13	0.916443	0.39	0.063	3.40044e-09	6.66399e-33	1.45817	0.487	0.117	1.27775e-28	1.77346e-13	1.3328e-32
Plcb1	0.00274546	0.260704	0.559	0.414	1	8.63868e-33	0.482003	0.74	0.319	1.65638e-28	0.00274546	1.72774e-32
Vmp1	4.84724e-08	-0.557862	0.695	0.831	0.00092941	8.66992e-33	-0.824105	0.753	0.865	1.66237e-28	4.84724e-08	1.73398e-32
Folr1	2.73737e-17	-1.24939	0.136	0.728	5.24863e-13	1.05652e-32	-1.10526	0.113	0.626	2.02577e-28	2.73737e-17	2.11303e-32
Enpep	3.56771e-15	-0.696604	0.051	0.64	6.84073e-11	1.12555e-32	-0.664208	0.12	0.65	2.15812e-28	3.56771e-15	2.25109e-32
Itm2b	6.4233e-07	0.41073	0.983	0.931	0.012316	1.74834e-32	0.556908	1	0.986	3.35226e-28	6.4233e-07	3.49668e-32
Mt1	2.43637e-07	0.8168	0.864	0.677	0.00467149	2.53452e-32	1.13956	0.907	0.566	4.85968e-28	2.43637e-07	5.06903e-32
Hnf4a	1.11025e-13	-0.786646	0.017	0.574	2.1288e-09	2.98264e-32	-0.715709	0.02	0.578	5.71892e-28	1.11025e-13	5.96529e-32
Cd24a	1.37044e-09	0.561379	0.932	0.722	2.62768e-05	3.70631e-32	0.731431	0.973	0.764	7.10649e-28	1.37044e-09	7.41263e-32
Gpi1	3.16436e-10	0.468381	0.949	0.885	6.06734e-06	4.32958e-32	0.592883	1	0.938	8.30153e-28	3.16436e-10	8.65916e-32
Lactb2	1.20214e-12	-0.787863	0.169	0.64	2.30498e-08	5.99878e-32	-0.731284	0.267	0.704	1.15021e-27	1.20214e-12	1.19976e-31
Tmem176a	2.5912e-06	-0.677212	0.797	0.813	0.0496836	1.67762e-31	-1.15943	0.967	0.948	3.21666e-27	2.5912e-06	3.35523e-31
Aspa	1.40359e-11	-0.620799	0.017	0.514	2.69125e-07	2.29541e-31	-0.985133	0.073	0.597	4.40123e-27	1.40359e-11	4.59083e-31
Cdh1	2.4998e-18	0.576527	0.881	0.447	4.79312e-14	2.58602e-31	0.50565	0.84	0.471	4.95844e-27	2.4998e-18	5.17204e-31
Pecr	1.91683e-09	-0.539857	0.254	0.634	3.67533e-05	3.11704e-31	-0.757891	0.353	0.743	5.97661e-27	1.91683e-09	6.23408e-31
Klk1	1.09627e-15	1.04037	0.271	0.015	2.10198e-11	4.43257e-31	0.628583	0.24	0.018	8.49901e-27	1.09627e-15	8.86514e-31
Cyba	2.86166e-12	-1.21338	0.864	0.861	5.48694e-08	7.54811e-31	-0.985628	0.96	0.96	1.44727e-26	2.86166e-12	1.50962e-30
Pla2g4a	5.84739e-12	0.316701	0.475	0.127	1.12118e-07	7.63144e-31	0.331812	0.413	0.081	1.46325e-26	5.84739e-12	1.52629e-30
Slc39a5	8.07526e-13	-0.946037	0.102	0.601	1.54835e-08	1.07166e-30	-0.987284	0.14	0.62	2.0548e-26	8.07526e-13	2.14332e-30
Iah1	1.76378e-10	-0.853439	0.627	0.767	3.38187e-06	1.22119e-30	-0.862395	0.633	0.87	2.34151e-26	1.76378e-10	2.44238e-30
Dpp4	7.2672e-10	-0.805904	0.542	0.749	1.39341e-05	1.2543e-30	-0.790058	0.62	0.837	2.40499e-26	7.2672e-10	2.5086e-30
Uqcrh	1.93412e-06	0.385265	1	0.946	0.0370849	1.68807e-30	0.424459	1	0.986	3.23671e-26	1.93412e-06	3.37615e-30
Tspan8	1.2953e-13	0.344348	0.508	0.115	2.4836e-09	2.92059e-30	0.326441	0.327	0.046	5.59993e-26	1.2953e-13	5.84117e-30
Lrp2	6.81063e-17	-2.00594	0.169	0.743	1.30587e-12	4.99808e-30	-1.65466	0.133	0.619	9.58332e-26	6.81063e-17	9.99616e-30
Mcmdc2	1.41218e-05	-0.285488	0.186	0.483	0.270772	7.14279e-30	-0.641855	0.133	0.624	1.36956e-25	1.41218e-05	1.42856e-29
Sfxn1	3.90855e-07	-0.625783	0.712	0.795	0.00749426	7.42124e-30	-0.753341	0.76	0.877	1.42295e-25	3.90855e-07	1.48425e-29
Irx2	2.9256e-09	0.598016	0.441	0.136	5.60954e-05	8.73217e-30	0.600728	0.56	0.167	1.67431e-25	2.9256e-09	1.74643e-29
Chka	2.75749e-08	0.68494	0.797	0.526	0.000528721	9.59634e-30	0.798349	0.82	0.453	1.84e-25	2.75749e-08	1.91927e-29
Slc23a1	4.72489e-09	-0.540684	0.085	0.492	9.0595e-05	1.16275e-29	-0.83647	0.047	0.56	2.22945e-25	4.72489e-09	2.32549e-29
Sult1d1	1.56891e-11	-1.45743	0.051	0.535	3.00823e-07	1.23065e-29	-1.6475	0.06	0.568	2.35965e-25	1.56891e-11	2.4613e-29
Gas2	2.54415e-13	-0.938502	0.136	0.637	4.87815e-09	1.34397e-29	-1.01237	0.093	0.59	2.57694e-25	2.54415e-13	2.68795e-29
Anks4b	7.09751e-11	-0.434639	0.051	0.511	1.36088e-06	1.3598e-29	-0.569337	0.013	0.54	2.60729e-25	7.09751e-11	2.71961e-29
St3gal6	6.56723e-13	0.399169	0.746	0.341	1.2592e-08	1.51703e-29	0.470378	0.673	0.29	2.90875e-25	6.56723e-13	3.03405e-29
Bag1	1.11194e-10	0.464279	0.949	0.819	2.13204e-06	1.79311e-29	0.505168	1	0.897	3.43812e-25	1.11194e-10	3.58623e-29
Epcam	8.59302e-19	0.927203	1	0.782	1.64763e-14	1.9354e-29	0.557722	0.993	0.841	3.71093e-25	8.59302e-19	3.87079e-29
0610005C13Rik	4.19783e-11	-0.843651	0.186	0.616	8.04891e-07	2.39425e-29	-0.759473	0.107	0.59	4.59074e-25	4.19783e-11	4.78851e-29
Chchd10	4.26902e-06	0.438446	1	0.915	0.0818543	4.29529e-29	0.639605	0.993	0.926	8.23578e-25	4.26902e-06	8.59058e-29
Nfe2l1	2.76432e-06	0.268897	0.847	0.637	0.0530031	5.6127e-29	0.510334	0.953	0.736	1.07618e-24	2.76432e-06	1.12254e-28
Mep1a	8.38704e-11	-1.42824	0.169	0.583	1.60813e-06	5.77601e-29	-1.38004	0.12	0.597	1.10749e-24	8.38704e-11	1.1552e-28
Cyp4a31	6.30747e-10	-0.443972	0	0.438	1.20939e-05	5.79606e-29	-0.7762	0.04	0.547	1.11134e-24	6.30747e-10	1.15921e-28
Adamts1	7.47337e-12	-0.969078	0.271	0.683	1.43294e-07	7.53703e-29	-0.919506	0.473	0.815	1.44515e-24	7.47337e-12	1.50741e-28
Hao2	2.95995e-07	-0.827632	0.288	0.574	0.00567542	9.86407e-29	-1.23428	0.26	0.669	1.89134e-24	2.95995e-07	1.97281e-28
Paqr5	9.13822e-08	0.544126	0.78	0.604	0.00175216	1.07697e-28	0.536185	0.933	0.711	2.06498e-24	9.13822e-08	2.15393e-28
Slc6a18	2.61472e-09	-0.700759	0.034	0.447	5.01346e-05	1.08544e-28	-1.01961	0.04	0.543	2.08122e-24	2.61472e-09	2.17088e-28
Ppp2r3a	2.80714e-12	0.53362	0.763	0.417	5.3824e-08	1.71884e-28	0.518354	0.773	0.445	3.29571e-24	2.80714e-12	3.43769e-28
Maf	3.21937e-15	-1.18472	0.085	0.656	6.17282e-11	5.0044e-28	-0.980599	0.107	0.588	9.59544e-24	3.21937e-15	1.00088e-27
Idh1	5.22437e-12	-1.11096	0.525	0.782	1.00172e-07	5.32285e-28	-1.08724	0.42	0.743	1.0206e-23	5.22437e-12	1.06457e-27
Tinag	6.98038e-12	-0.613669	0.034	0.538	1.33842e-07	5.89501e-28	-0.594329	0.1	0.585	1.13031e-23	6.98038e-12	1.179e-27
Fads3	1.45703e-10	-0.593832	0.034	0.508	2.79371e-06	6.68581e-28	-0.770723	0.033	0.531	1.28194e-23	1.45703e-10	1.33716e-27
Cdc42ep5	6.59206e-13	0.32099	0.61	0.215	1.26396e-08	1.02233e-27	0.362881	0.66	0.255	1.96021e-23	6.59206e-13	2.04465e-27
Cyp51	0.000127555	-0.339163	0.475	0.668	1	1.18263e-27	-0.749631	0.267	0.678	2.26758e-23	0.000127555	2.36527e-27
Slc9a3r1	1.96168e-11	-0.856654	0.508	0.761	3.76133e-07	1.95014e-27	-0.767989	0.433	0.73	3.73919e-23	1.96168e-11	3.90027e-27
Stk39	1.84471e-11	0.392788	0.695	0.323	3.53706e-07	1.96667e-27	0.400971	0.713	0.333	3.77089e-23	1.84471e-11	3.93333e-27
Hoxb5os	1.47153e-05	0.312616	0.712	0.489	0.282151	1.98018e-27	0.53647	0.753	0.357	3.7968e-23	1.47153e-05	3.96036e-27
Slc22a6	3.79869e-11	-1.16512	0.034	0.514	7.28361e-07	2.30029e-27	-1.33056	0.04	0.53	4.41058e-23	3.79869e-11	4.60058e-27
Cds1	3.88656e-08	0.315615	0.695	0.417	0.000745208	2.62419e-27	0.384812	0.827	0.45	5.03161e-23	3.88656e-08	5.24837e-27
Rab11a	1.27827e-09	-0.576777	0.797	0.885	2.45095e-05	2.64172e-27	-0.607736	0.907	0.936	5.06524e-23	1.27827e-09	5.28345e-27
Hmgb2	1.10121e-05	0.582776	0.881	0.752	0.211147	2.69198e-27	0.664893	0.953	0.775	5.1616e-23	1.10121e-05	5.38396e-27
Pappa2	2.26124e-19	0.401047	0.288	0.009	4.33569e-15	3.61601e-27	0.334529	0.14	0.002	6.93335e-23	2.26124e-19	7.23203e-27
Aldob	9.01971e-16	-2.49967	0.102	0.68	1.72944e-11	3.7871e-27	-2.48008	0.12	0.579	7.26138e-23	9.01971e-16	7.57419e-27
Impa2	3.76173e-17	0.575569	0.847	0.411	7.21274e-13	4.59728e-27	0.418021	0.693	0.298	8.81483e-23	3.76173e-17	9.19456e-27
Gstm5	1.00962e-08	-0.603222	0.627	0.785	0.000193585	6.41224e-27	-0.660478	0.807	0.901	1.22948e-22	1.00962e-08	1.28245e-26
Inpp5f	1.46983e-05	-0.265119	0.339	0.592	0.281825	1.31361e-26	-0.456528	0.147	0.625	2.51872e-22	1.46983e-05	2.62723e-26
Gclm	3.11801e-07	-0.860464	0.695	0.782	0.00597847	2.2674e-26	-1.11895	0.78	0.857	4.34752e-22	3.11801e-07	4.53481e-26
Snx1	4.89205e-08	-0.447815	0.373	0.647	0.000938002	3.47012e-26	-0.550775	0.433	0.754	6.65361e-22	4.89205e-08	6.94024e-26
Pkm	1.24652e-12	0.630702	1	0.801	2.39008e-08	3.73646e-26	0.529134	1	0.873	7.16429e-22	1.24652e-12	7.47292e-26
Cgnl1	6.11063e-08	0.393447	0.712	0.405	0.00117165	6.34345e-26	0.393089	0.68	0.303	1.21629e-21	6.11063e-08	1.26869e-25
Tmem174	8.9463e-13	-1.20888	0.034	0.559	1.71536e-08	7.71985e-26	-1.1089	0.047	0.512	1.4802e-21	8.9463e-13	1.54397e-25
Clta	4.2747e-05	-0.30962	0.898	0.897	0.819631	9.93162e-26	-0.447079	0.993	0.965	1.90429e-21	4.2747e-05	1.98632e-25
Pdhb	3.74609e-07	0.331237	0.915	0.789	0.00718276	1.04451e-25	0.415348	0.96	0.795	2.00275e-21	3.74609e-07	2.08903e-25
Gga2	2.70059e-07	0.367033	0.729	0.483	0.00517812	1.73508e-25	0.414081	0.84	0.494	3.32684e-21	2.70059e-07	3.47016e-25
Erbb4	0.00216028	0.278745	0.424	0.266	1	2.64493e-25	0.320411	0.64	0.27	5.07138e-21	0.00216028	5.28985e-25
Lpl	1.31156e-09	0.539174	0.492	0.169	2.51478e-05	3.34699e-25	0.524867	0.407	0.102	6.41752e-21	1.31156e-09	6.69398e-25
Eif5a	0.00272759	-0.253278	0.966	0.912	1	4.21273e-25	-0.455188	1	0.976	8.07749e-21	0.00272759	8.42546e-25
Abhd6	3.47011e-10	0.254188	0.525	0.187	6.6536e-06	4.72861e-25	0.251428	0.48	0.148	9.06664e-21	3.47011e-10	9.45722e-25
Cubn	3.75635e-11	-0.758918	0.017	0.495	7.20243e-07	5.2071e-25	-0.63688	0.033	0.498	9.9841e-21	3.75635e-11	1.04142e-24
B3gat2	5.94577e-11	-0.445954	0	0.474	1.14004e-06	6.02772e-25	-0.482893	0.047	0.508	1.15575e-20	5.94577e-11	1.20554e-24
Clu	5.13845e-11	-1.02199	0.475	0.77	9.85247e-07	6.34649e-25	-0.886729	0.48	0.781	1.21688e-20	5.13845e-11	1.2693e-24
Lrpap1	1.08192e-10	-1.07443	0.746	0.84	2.07446e-06	6.59856e-25	-0.998801	0.84	0.877	1.26521e-20	1.08192e-10	1.31971e-24
Aadat	2.12982e-08	-1.33377	0.102	0.483	0.000408371	7.04157e-25	-1.82599	0.1	0.544	1.35015e-20	2.12982e-08	1.40831e-24
Ace	1.77933e-07	-0.45727	0.051	0.396	0.00341168	8.86109e-25	-0.569482	0.027	0.486	1.69903e-20	1.77933e-07	1.77222e-24
Osr2	1.25121e-09	-0.753627	0.034	0.477	2.39907e-05	8.9835e-25	-0.739494	0.047	0.514	1.7225e-20	1.25121e-09	1.7967e-24
Rnf6	0.000278186	-0.308632	0.61	0.695	1	9.35766e-25	-0.667628	0.573	0.798	1.79424e-20	0.000278186	1.87153e-24
Ndufb5	3.12334e-05	0.331428	0.949	0.915	0.59887	2.09745e-24	0.391671	1	0.96	4.02165e-20	3.12334e-05	4.1949e-24
Slc27a2	8.07239e-11	-0.74972	0.017	0.483	1.5478e-06	2.17879e-24	-1.10023	0.027	0.48	4.17761e-20	8.07239e-11	4.35758e-24
Mitf	1.22323e-08	0.261066	0.508	0.199	0.000234542	2.46726e-24	0.267135	0.553	0.19	4.73072e-20	1.22323e-08	4.93451e-24
Ldhb	2.16662e-07	0.556865	1	0.921	0.00415428	4.07496e-24	0.628996	1	0.868	7.81333e-20	2.16662e-07	8.14992e-24
Pgk1	5.43956e-13	0.477104	1	0.888	1.04298e-08	5.57227e-24	0.448266	1	0.953	1.06843e-19	5.43956e-13	1.11445e-23
Aes	5.30586e-11	0.320799	0.983	0.894	1.01735e-06	6.89671e-24	0.372905	1	0.932	1.32238e-19	5.30586e-11	1.37934e-23
Isyna1	7.68164e-07	0.300962	0.729	0.495	0.0147288	7.84195e-24	0.368351	0.853	0.54	1.50362e-19	7.68164e-07	1.56839e-23
Cpb2	1.40405e-08	-0.39979	0.085	0.474	0.000269212	8.25518e-24	-0.780695	0.24	0.669	1.58285e-19	1.40405e-08	1.65104e-23
Gm4450	5.11004e-09	-0.441015	0.017	0.429	9.79799e-05	8.79147e-24	-0.515634	0.013	0.461	1.68568e-19	5.11004e-09	1.75829e-23
Tmem229a	1.17506e-10	-0.513189	0.085	0.529	2.25306e-06	1.09045e-23	-0.500387	0.06	0.506	2.09084e-19	1.17506e-10	2.18091e-23
Ckap4	7.44392e-09	0.438287	0.814	0.589	0.00014273	1.35037e-23	0.409	0.873	0.612	2.58919e-19	7.44392e-09	2.70073e-23
Ap1m2	1.58489e-12	0.339032	0.661	0.263	3.03887e-08	1.49176e-23	0.29928	0.7	0.321	2.8603e-19	1.58489e-12	2.98352e-23
Atp5c1	3.41765e-07	0.370375	0.983	0.94	0.00655301	1.63628e-23	0.412	1	0.98	3.1374e-19	3.41765e-07	3.27256e-23
Tpmt	0.00028088	-0.398106	0.576	0.662	1	1.69498e-23	-0.713278	0.54	0.776	3.24996e-19	0.00028088	3.38996e-23
Slc2a2	2.21596e-11	-0.750114	0.034	0.517	4.24888e-07	1.7571e-23	-0.516636	0.033	0.477	3.36906e-19	2.21596e-11	3.5142e-23
Serpinf2	2.18377e-11	-0.820889	0.017	0.508	4.18716e-07	2.17812e-23	-0.700682	0.053	0.493	4.17633e-19	2.18377e-11	4.35624e-23
S100a10	5.55536e-13	-0.923974	0.508	0.782	1.06518e-08	2.24905e-23	-0.784954	0.553	0.799	4.31234e-19	5.55536e-13	4.49811e-23
Slc37a4	1.98143e-11	-0.635783	0.153	0.604	3.79919e-07	3.17855e-23	-0.484875	0.187	0.602	6.09454e-19	1.98143e-11	6.35709e-23
Ly6a	3.91144e-05	0.49761	0.949	0.776	0.74998	5.08143e-23	0.822882	0.88	0.561	9.74314e-19	3.91144e-05	1.01629e-22
Cycs	2.58385e-09	0.793924	0.949	0.852	4.95427e-05	6.93841e-23	0.708464	0.947	0.797	1.33037e-18	2.58385e-09	1.38768e-22
Gm1673	2.19747e-09	0.436267	0.898	0.55	4.21342e-05	7.10197e-23	0.37637	0.847	0.527	1.36173e-18	2.19747e-09	1.42039e-22
Tcea3	7.28927e-08	-0.320176	0.085	0.462	0.00139764	7.90702e-23	-0.565572	0.067	0.501	1.51609e-18	7.28927e-08	1.5814e-22
Igfbp7	2.19355e-05	-0.551631	0.864	0.888	0.420591	1.03731e-22	-0.785148	0.933	0.962	1.98894e-18	2.19355e-05	2.07462e-22
Steap2	1.05299e-08	-0.48729	0.254	0.595	0.0002019	1.0539e-22	-0.485488	0.213	0.617	2.02075e-18	1.05299e-08	2.1078e-22
Tst	6.91807e-12	-1.15496	0.407	0.698	1.32647e-07	1.38692e-22	-0.951729	0.373	0.68	2.65929e-18	6.91807e-12	2.77385e-22
Mfsd4a	2.03098e-13	0.314086	0.492	0.121	3.8942e-09	1.87925e-22	0.321338	0.413	0.121	3.60328e-18	2.03098e-13	3.75851e-22
Slc6a13	8.71174e-10	-0.573907	0.085	0.523	1.67039e-05	1.91691e-22	-0.69871	0.107	0.518	3.67549e-18	8.71174e-10	3.83382e-22
Ybx1	6.97658e-10	0.407735	1	0.961	1.33769e-05	2.01244e-22	0.65207	1	0.989	3.85866e-18	6.97658e-10	4.02489e-22
Retreg1	0.000889897	-0.271715	0.627	0.695	1	2.1008e-22	-0.580473	0.653	0.828	4.02808e-18	0.000889897	4.20161e-22
Cited2	0.00690234	-0.486532	0.797	0.773	1	3.84996e-22	-0.781509	0.867	0.911	7.38191e-18	0.00690234	7.69992e-22
Mrpl50	0.00125627	-0.370707	0.644	0.716	1	4.09438e-22	-0.518981	0.673	0.818	7.85056e-18	0.00125627	8.18876e-22
Slc39a8	7.16178e-05	-0.259656	0.186	0.42	1	4.16318e-22	-0.595271	0.207	0.602	7.98248e-18	7.16178e-05	8.32635e-22
Gipc2	2.58657e-05	-0.509781	0.441	0.61	0.495948	5.16878e-22	-0.771725	0.427	0.685	9.91063e-18	2.58657e-05	1.03376e-21
Smad7	5.74435e-10	0.346941	0.746	0.402	1.10142e-05	6.17434e-22	0.430994	0.8	0.464	1.18387e-17	5.74435e-10	1.23487e-21
Calm3	7.63911e-05	-0.366104	0.881	0.84	1	7.68741e-22	-0.477317	0.927	0.931	1.47398e-17	7.63911e-05	1.53748e-21
Mme	0.00091388	-0.552223	0.475	0.634	1	9.66693e-22	-0.728063	0.767	0.875	1.85354e-17	0.00091388	1.93339e-21
Palm	8.09225e-08	-0.492948	0.458	0.689	0.00155161	9.71837e-22	-0.495814	0.613	0.806	1.8634e-17	8.09225e-08	1.94367e-21
Ogdh	0.000277046	0.337541	0.763	0.662	1	1.06359e-21	0.37818	0.827	0.518	2.03932e-17	0.000277046	2.12717e-21
Grtp1	6.91527e-07	-0.280055	0.102	0.432	0.0132593	1.18136e-21	-0.321238	0.04	0.459	2.26514e-17	6.91527e-07	2.36272e-21
Hmox2	1.72144e-08	0.300233	0.864	0.64	0.000330069	1.72195e-21	0.392518	0.893	0.672	3.30168e-17	1.72144e-08	3.44391e-21
Ethe1	1.66846e-05	0.255624	0.661	0.444	0.319911	1.7466e-21	0.349333	0.673	0.328	3.34893e-17	1.66846e-05	3.4932e-21
Irf2bpl	3.04962e-06	0.279317	0.678	0.441	0.0584735	1.84755e-21	0.328747	0.84	0.506	3.5425e-17	3.04962e-06	3.69511e-21
Smim1	6.79503e-08	-0.529179	0.339	0.634	0.00130288	1.89318e-21	-0.602091	0.4	0.712	3.62998e-17	6.79503e-08	3.78635e-21
Pfkp	8.97915e-10	0.405766	0.746	0.396	1.72166e-05	1.93597e-21	0.45058	0.733	0.383	3.71203e-17	8.97915e-10	3.87194e-21
Cdhr2	1.23946e-06	-0.254232	0	0.305	0.0237655	2.27779e-21	-0.386053	0.013	0.427	4.36744e-17	1.23946e-06	4.55559e-21
Anxa2	0.00220439	0.434551	0.712	0.595	1	2.87587e-21	0.595287	0.82	0.503	5.5142e-17	0.00220439	5.75175e-21
Cldn2	1.18256e-11	-0.82084	0.051	0.541	2.26744e-07	3.82846e-21	-0.64416	0.007	0.416	7.34069e-17	1.18256e-11	7.65692e-21
Dlat	9.066e-05	0.316185	0.831	0.677	1	4.1783e-21	0.348513	0.873	0.574	8.01147e-17	9.066e-05	8.3566e-21
Id1	0.00507805	-0.789778	0.339	0.486	1	4.45108e-21	-1.12862	0.287	0.648	8.5345e-17	0.00507805	8.90216e-21
Gm19950	3.54968e-11	-0.727349	0.017	0.495	6.80616e-07	4.63881e-21	-0.686254	0.027	0.433	8.89445e-17	3.54968e-11	9.27761e-21
Ccnd1	2.37451e-09	0.668622	0.797	0.471	4.55289e-05	4.68186e-21	0.626162	0.8	0.485	8.977e-17	2.37451e-09	9.36372e-21
Slc2a1	1.89228e-10	0.477299	0.797	0.48	3.62826e-06	4.6819e-21	0.576752	0.747	0.457	8.97707e-17	1.89228e-10	9.36379e-21
Cxadr	4.99932e-12	0.391877	0.814	0.45	9.58569e-08	5.7742e-21	0.382222	0.78	0.476	1.10714e-16	4.99932e-12	1.15484e-20
Ndufb9	0.000349513	0.310708	0.966	0.946	1	5.87542e-21	0.46954	1	0.976	1.12655e-16	0.000349513	1.17508e-20
Cmtm8	5.63842e-06	0.312535	0.678	0.423	0.108111	6.30181e-21	0.342551	0.753	0.443	1.20831e-16	5.63842e-06	1.26036e-20
Col4a1	5.65811e-05	-0.430945	0.915	0.855	1	7.47143e-21	-0.587602	0.887	0.923	1.43257e-16	5.65811e-05	1.49429e-20
Cdh6	4.37339e-07	-0.703566	0.424	0.665	0.00838553	7.7559e-21	-0.687754	0.447	0.739	1.48712e-16	4.37339e-07	1.55118e-20
Atp5b	1.04478e-05	0.395374	1	0.991	0.200326	7.77188e-21	0.423894	1	0.997	1.49018e-16	1.04478e-05	1.55438e-20
Nipsnap1	8.76451e-06	-0.415523	0.559	0.74	0.168051	7.86547e-21	-0.543606	0.64	0.798	1.50813e-16	8.76451e-06	1.57309e-20
Acy3	1.67583e-05	-0.660978	0.288	0.517	0.321325	9.65405e-21	-0.855634	0.18	0.546	1.85107e-16	1.67583e-05	1.93081e-20
Fmo1	2.53334e-11	-0.797787	0.017	0.505	4.85743e-07	1.0262e-20	-0.721106	0.027	0.43	1.96764e-16	2.53334e-11	2.05241e-20
Scp2	1.32708e-06	-0.640651	0.847	0.843	0.0254455	1.12679e-20	-0.546696	0.887	0.919	2.16052e-16	1.32708e-06	2.25359e-20
Gramd1b	5.84452e-06	-0.262553	0.102	0.393	0.112063	1.14742e-20	-0.387892	0.06	0.471	2.20007e-16	5.84452e-06	2.29485e-20
Slc47a1	1.41401e-11	-0.656629	0.034	0.52	2.71121e-07	1.32929e-20	-0.495385	0.013	0.416	2.54878e-16	1.41401e-11	2.65858e-20
Gss	3.95074e-07	-0.653926	0.322	0.589	0.00757515	1.40083e-20	-0.715141	0.347	0.664	2.68595e-16	3.95074e-07	2.80166e-20
Cox8a	1.8597e-05	0.362145	0.983	0.976	0.356579	1.5166e-20	0.424698	1	0.998	2.90792e-16	1.8597e-05	3.03319e-20
Hcfc1r1	8.56767e-11	0.470368	0.915	0.622	1.64277e-06	2.01404e-20	0.398049	0.913	0.762	3.86173e-16	8.56767e-11	4.02809e-20
Idh3a	1.71776e-09	0.516924	0.831	0.713	3.29363e-05	2.709e-20	0.515064	0.86	0.666	5.19425e-16	1.71776e-09	5.41801e-20
Slc25a5	6.37348e-07	0.519489	1	0.949	0.0122205	2.94052e-20	0.631892	1	0.953	5.63815e-16	6.37348e-07	5.88103e-20
Acot1	7.67091e-07	-0.656463	0.559	0.701	0.0147082	2.95022e-20	-0.714242	0.687	0.801	5.65675e-16	7.67091e-07	5.90044e-20
Spp2	8.24231e-11	-2.14106	0.119	0.559	1.58038e-06	3.11928e-20	-1.81138	0.127	0.511	5.98091e-16	8.24231e-11	6.23856e-20
Hdc	5.56772e-13	-1.58164	0.085	0.601	1.06755e-08	3.18659e-20	-1.21017	0.04	0.434	6.10996e-16	5.56772e-13	6.37317e-20
Thap4	1.98301e-05	0.253538	0.661	0.508	0.380223	3.22771e-20	0.280992	0.68	0.357	6.18881e-16	1.98301e-05	6.45542e-20
Hykk	7.79888e-10	-0.511155	0.051	0.489	1.49536e-05	4.06074e-20	-0.431768	0.04	0.436	7.78607e-16	7.79888e-10	8.12149e-20
Akr7a5	1.27393e-08	-0.700121	0.831	0.834	0.000244263	4.23087e-20	-0.670483	0.813	0.866	8.11226e-16	1.27393e-08	8.46173e-20
Psma4	0.00141696	-0.300114	0.949	0.87	1	4.817e-20	-0.532762	0.967	0.938	9.23612e-16	0.00141696	9.634e-20
Cox7b	7.67371e-07	0.46653	1	0.931	0.0147136	5.48759e-20	0.441123	1	0.959	1.05219e-15	7.67371e-07	1.09752e-19
Slc38a1	1.06947e-07	0.321921	0.695	0.414	0.00205061	5.55341e-20	0.317671	0.713	0.366	1.06481e-15	1.06947e-07	1.11068e-19
Ghr	2.33522e-10	-0.541168	0.203	0.61	4.47756e-06	6.72333e-20	-0.491197	0.207	0.572	1.28913e-15	2.33522e-10	1.34467e-19
mt-Co1	0.00109212	0.262437	1	0.994	1	7.96665e-20	0.34924	1	0.995	1.52753e-15	0.00109212	1.59333e-19
Hist1h2bc	0.0856195	-0.271171	0.61	0.653	1	9.05399e-20	-0.74879	0.68	0.824	1.73601e-15	0.0856195	1.8108e-19
Myl6	7.80365e-05	-0.267503	0.983	0.946	1	1.02715e-19	-0.337996	1	0.984	1.96947e-15	7.80365e-05	2.05431e-19
Ankrd33b	1.70299e-08	-0.280807	0	0.384	0.000326531	1.08751e-19	-0.385309	0.027	0.418	2.08519e-15	1.70299e-08	2.17502e-19
Fbp1	1.06944e-10	-1.43158	0.051	0.514	2.05054e-06	1.19831e-19	-1.79686	0.16	0.522	2.29763e-15	1.06944e-10	2.39661e-19
Eprn	5.51089e-05	0.346281	0.271	0.094	1	1.80606e-19	0.434474	0.273	0.058	3.46295e-15	5.51089e-05	3.61213e-19
Cyr61	0.005815	-0.469374	0.339	0.465	1	1.92556e-19	-0.715938	0.24	0.619	3.69206e-15	0.005815	3.85111e-19
Lrrfip1	1.10638e-11	0.429337	0.695	0.317	2.12138e-07	1.95752e-19	0.297748	0.64	0.307	3.75334e-15	1.10638e-11	3.91503e-19
Atp5h	1.04918e-07	0.389263	1	0.952	0.00201169	2.30611e-19	0.400997	1	0.987	4.42174e-15	1.04918e-07	4.61223e-19
Nat8f1	2.00042e-09	-1.68847	0.203	0.577	3.8356e-05	2.36094e-19	-1.52419	0.287	0.599	4.52686e-15	2.00042e-09	4.72187e-19
Clrn3	3.60107e-10	-0.499699	0.017	0.465	6.9047e-06	2.41043e-19	-0.385088	0.007	0.39	4.62176e-15	3.60107e-10	4.82086e-19
Ctsh	2.11477e-08	-0.624713	0.288	0.607	0.000405485	2.60947e-19	-0.673956	0.427	0.687	5.0034e-15	2.11477e-08	5.21895e-19
Spink1	3.4972e-10	-1.3972	0.237	0.631	6.70554e-06	3.172e-19	-0.916484	0.16	0.528	6.08198e-15	3.4972e-10	6.34399e-19
Gabarapl1	2.74395e-08	0.336094	0.78	0.477	0.000526125	3.19876e-19	0.503877	0.767	0.455	6.13329e-15	2.74395e-08	6.39751e-19
Cndp2	2.25964e-09	-1.17727	0.627	0.761	4.33264e-05	4.56162e-19	-0.815544	0.52	0.723	8.74646e-15	2.25964e-09	9.12325e-19
Glud1	1.54094e-05	-0.633594	0.932	0.906	0.29546	4.70432e-19	-0.53476	0.987	0.971	9.02006e-15	1.54094e-05	9.40864e-19
Sema3c	1.09242e-05	-0.553516	0.424	0.619	0.209461	5.04867e-19	-0.564118	0.467	0.738	9.68033e-15	1.09242e-05	1.00973e-18
Slc5a8	3.47227e-06	-0.515401	0.017	0.305	0.0665773	5.2e-19	-0.75978	0.013	0.391	9.97048e-15	3.47227e-06	1.04e-18
Cgref1	9.84118e-07	-0.409779	0.153	0.459	0.0188695	6.17393e-19	-0.541262	0.107	0.479	1.18379e-14	9.84118e-07	1.23479e-18
Mrpl42	2.97974e-05	0.288082	0.966	0.873	0.571334	6.62042e-19	0.362038	0.98	0.894	1.2694e-14	2.97974e-05	1.32408e-18
Lman1	7.36088e-07	0.273562	0.915	0.734	0.0141138	7.02946e-19	0.333223	0.96	0.825	1.34783e-14	7.36088e-07	1.40589e-18
Spint2	1.19665e-11	0.433323	0.966	0.819	2.29446e-07	8.11877e-19	0.353858	0.967	0.882	1.55669e-14	1.19665e-11	1.62375e-18
Tmem150a	7.07988e-11	-0.642397	0.068	0.538	1.3575e-06	8.49372e-19	-0.524938	0.087	0.463	1.62859e-14	7.07988e-11	1.69874e-18
Dusp14	3.69222e-06	-0.372243	0.271	0.55	0.0707947	8.57326e-19	-0.484561	0.313	0.646	1.64384e-14	3.69222e-06	1.71465e-18
2200002D01Rik	2.15495e-08	-0.384398	0.034	0.414	0.000413189	1.27001e-18	-0.412063	0.053	0.429	2.43512e-14	2.15495e-08	2.54002e-18
Susd3	2.73755e-10	-0.564305	0.017	0.465	5.24899e-06	1.57391e-18	-0.535652	0.02	0.39	3.01781e-14	2.73755e-10	3.14782e-18
Glyat	1.9912e-11	-0.653534	0.017	0.511	3.81792e-07	1.64143e-18	-0.471735	0.007	0.376	3.14727e-14	1.9912e-11	3.28285e-18
Rab11fip3	1.63522e-07	-0.381866	0.102	0.462	0.00313537	1.70429e-18	-0.344731	0.113	0.488	3.2678e-14	1.63522e-07	3.40857e-18
Cyp4a10	1.27765e-07	-0.340654	0.017	0.366	0.00244977	1.99516e-18	-0.42008	0.013	0.382	3.82552e-14	1.27765e-07	3.99032e-18
Got1	4.78287e-06	0.474782	0.763	0.625	0.0917067	2.07892e-18	0.426377	0.74	0.429	3.98613e-14	4.78287e-06	4.15784e-18
Slc34a1	1.44594e-12	-2.2255	0.102	0.595	2.77244e-08	2.19274e-18	-1.92045	0.1	0.457	4.20436e-14	1.44594e-12	4.38548e-18
Sod3	5.82252e-09	-0.429279	0.017	0.429	0.000111641	2.21323e-18	-0.500181	0.027	0.396	4.24364e-14	5.82252e-09	4.42645e-18
Nfe2l2	1.01928e-08	0.399898	0.814	0.574	0.000195436	2.22971e-18	0.339365	0.88	0.638	4.27524e-14	1.01928e-08	4.45941e-18
Aldh6a1	0.000129337	-0.539429	0.39	0.568	1	2.43616e-18	-0.608844	0.36	0.666	4.6711e-14	0.000129337	4.87233e-18
Cox5b	0.000485915	0.389876	0.983	0.943	1	2.45546e-18	0.460341	0.993	0.971	4.7081e-14	0.000485915	4.91092e-18
Cideb	1.16923e-08	-0.456469	0.102	0.483	0.000224189	6.27565e-18	-0.462853	0.173	0.529	1.20329e-13	1.16923e-08	1.25513e-17
Ncoa7	8.45988e-06	-0.404233	0.407	0.637	0.16221	6.73895e-18	-0.547768	0.5	0.735	1.29213e-13	8.45988e-06	1.34779e-17
Sigirr	6.6245e-09	-0.518423	0.169	0.544	0.000127018	7.96474e-18	-0.416389	0.227	0.565	1.52716e-13	6.6245e-09	1.59295e-17
Uqcrc2	0.00433784	0.282179	0.966	0.879	1	1.05105e-17	0.389942	0.993	0.955	2.01528e-13	0.00433784	2.1021e-17
Slc4a4	2.94428e-08	-0.985597	0.271	0.592	0.000564536	1.14955e-17	-0.80791	0.187	0.528	2.20415e-13	2.94428e-08	2.2991e-17
Bace1	2.46698e-08	0.272131	0.678	0.375	0.000473019	1.46345e-17	0.254473	0.613	0.302	2.80602e-13	2.46698e-08	2.9269e-17
Txndc17	5.7984e-08	-0.607902	0.898	0.858	0.00111178	1.52537e-17	-0.494358	0.94	0.936	2.92474e-13	5.7984e-08	3.05073e-17
Tmem252	7.92591e-07	-0.409414	0.119	0.447	0.0151971	1.67464e-17	-0.731252	0.06	0.415	3.21096e-13	7.92591e-07	3.34929e-17
Epb41l5	4.47494e-08	-0.397722	0.322	0.653	0.000858025	1.71105e-17	-0.384242	0.36	0.678	3.28076e-13	4.47494e-08	3.4221e-17
Rrm2	1.12746e-07	0.406849	0.525	0.236	0.00216179	1.7617e-17	0.343962	0.387	0.123	3.37789e-13	1.12746e-07	3.5234e-17
Snx6	3.92751e-08	-0.564294	0.729	0.822	0.000753061	1.85059e-17	-0.404801	0.793	0.874	3.54833e-13	3.92751e-08	3.70119e-17
Mettl7a1	2.10666e-05	-0.276152	0.186	0.474	0.403931	1.98555e-17	-0.562699	0.133	0.499	3.8071e-13	2.10666e-05	3.97111e-17
Gm266	3.35456e-05	-0.54848	0.288	0.52	0.643203	2.00404e-17	-0.581241	0.16	0.514	3.84254e-13	3.35456e-05	4.00808e-17
Smim24	2.35536e-11	-0.629352	0.068	0.535	4.51616e-07	2.05011e-17	-0.514491	0.133	0.481	3.93088e-13	2.35536e-11	4.10022e-17
Gcnt1	7.2779e-12	-0.822178	0.068	0.559	1.39546e-07	2.18038e-17	-0.560995	0.113	0.471	4.18066e-13	7.2779e-12	4.36076e-17
Smpdl3a	0.00027285	0.281799	0.729	0.541	1	2.25867e-17	0.290812	0.793	0.482	4.33078e-13	0.00027285	4.51735e-17
Napsa	3.65894e-05	-1.36472	0.475	0.589	0.701565	2.33387e-17	-2.25872	0.34	0.596	4.47496e-13	3.65894e-05	4.66773e-17
Pck1	6.87136e-07	-0.475941	0.017	0.335	0.0131751	2.43571e-17	-0.908682	0.027	0.379	4.67023e-13	6.87136e-07	4.87142e-17
Tnfaip8	4.03809e-06	-0.404847	0.254	0.529	0.0774264	2.68162e-17	-0.514436	0.273	0.592	5.14174e-13	4.03809e-06	5.36324e-17
Pipox	3.10961e-08	-0.349542	0.034	0.417	0.000596237	2.7326e-17	-0.372583	0.06	0.418	5.23949e-13	3.10961e-08	5.46521e-17
Slc22a2	1.04206e-08	-0.763637	0.017	0.411	0.000199805	3.98678e-17	-0.782431	0.007	0.353	7.64424e-13	1.04206e-08	7.97355e-17
Ace2	1.71974e-05	-0.439115	0.22	0.462	0.329744	4.13035e-17	-0.481639	0.1	0.448	7.91953e-13	1.71974e-05	8.2607e-17
Ssbp4	1.08065e-10	0.377524	0.831	0.468	2.07203e-06	4.22279e-17	0.287991	0.8	0.512	8.09677e-13	1.08065e-10	8.44558e-17
Purb	3.60151e-05	0.267595	0.847	0.755	0.690554	4.32607e-17	0.30261	0.967	0.811	8.2948e-13	3.60151e-05	8.65213e-17
Mpp6	0.00408221	-0.276682	0.695	0.731	1	5.30226e-17	-0.453629	0.727	0.833	1.01665e-12	0.00408221	1.06045e-16
Slc25a3	2.40614e-05	0.383354	1	0.976	0.461354	5.59139e-17	0.363504	1	0.989	1.07209e-12	2.40614e-05	1.11828e-16
Cth	0.000381259	-0.568153	0.508	0.613	1	6.01008e-17	-0.731539	0.367	0.63	1.15237e-12	0.000381259	1.20202e-16
Atp5o.1	0.000216019	0.29891	1	0.955	1	6.08392e-17	0.431054	0.993	0.983	1.16653e-12	0.000216019	1.21678e-16
Gnai1	4.96212e-06	-0.477003	0.508	0.695	0.0951438	6.09786e-17	-0.582934	0.547	0.754	1.1692e-12	4.96212e-06	1.21957e-16
Dao	2.03987e-12	-0.725667	0.017	0.535	3.91124e-08	6.79415e-17	-0.522521	0.02	0.364	1.30271e-12	2.03987e-12	1.35883e-16
Ggt1	0.001463	-0.83524	0.847	0.773	1	7.55748e-17	-1.07893	0.887	0.855	1.44907e-12	0.001463	1.5115e-16
Atp5a1	3.07214e-06	0.35907	1	0.988	0.0589052	7.65952e-17	0.387095	1	0.997	1.46864e-12	3.07214e-06	1.5319e-16
Slc25a11	1.09422e-05	0.257567	0.898	0.789	0.209806	9.65704e-17	0.302591	0.96	0.846	1.85164e-12	1.09422e-05	1.93141e-16
Klhl3	5.91027e-07	0.267894	0.407	0.151	0.0113323	1.15016e-16	0.276611	0.367	0.118	2.20533e-12	5.91027e-07	2.30033e-16
Mdh2	3.33433e-06	0.443683	1	0.921	0.0639324	1.20838e-16	0.38044	1	0.964	2.31695e-12	3.33433e-06	2.41676e-16
Amacr	3.53218e-06	-0.440977	0.339	0.589	0.0677259	1.23126e-16	-0.522943	0.307	0.588	2.36081e-12	3.53218e-06	2.46251e-16
Cyp2j5	4.9396e-07	-0.729036	0.017	0.341	0.00947119	1.43638e-16	-0.976695	0.013	0.351	2.75411e-12	4.9396e-07	2.87275e-16
Cox6b1	1.88951e-05	0.420214	1	0.943	0.362295	1.57995e-16	0.400041	1	0.979	3.0294e-12	1.88951e-05	3.1599e-16
Gm45792	7.53389e-09	-0.62034	0.017	0.414	0.000144455	1.78875e-16	-0.57534	0.02	0.357	3.42975e-12	7.53389e-09	3.5775e-16
Ehd1	4.71257e-08	-0.514816	0.441	0.716	0.000903587	2.25697e-16	-0.505249	0.487	0.696	4.32751e-12	4.71257e-08	4.51394e-16
Prodh2	4.90953e-08	-0.63009	0.017	0.39	0.000941352	2.30755e-16	-0.602411	0.007	0.341	4.4245e-12	4.90953e-08	4.6151e-16
Cbr1	1.36472e-06	-0.86464	0.729	0.801	0.0261671	2.38786e-16	-0.891642	0.907	0.902	4.57848e-12	1.36472e-06	4.77572e-16
Gpc4	0.00466582	-0.406041	0.644	0.683	1	3.06495e-16	-0.514446	0.653	0.788	5.87673e-12	0.00466582	6.12989e-16
Mpnd	2.50176e-07	0.252929	0.831	0.574	0.00479687	3.09075e-16	0.3145	0.847	0.628	5.9262e-12	2.50176e-07	6.1815e-16
Slc3a1	5.36752e-09	-0.729249	0.017	0.426	0.000102917	3.09856e-16	-0.631789	0.013	0.347	5.94118e-12	5.36752e-09	6.19713e-16
Pou3f3	3.14928e-16	0.617563	0.831	0.347	6.03843e-12	1.26143e-14	0.350061	0.907	0.635	2.41866e-10	1.26143e-14	6.29856e-16
Cavin2	2.11058e-05	0.358819	0.305	0.112	0.404682	3.41136e-16	0.253685	0.247	0.054	6.54095e-12	2.11058e-05	6.82273e-16
Rassf10	9.84261e-08	0.255553	0.475	0.175	0.00188722	3.46399e-16	0.261994	0.467	0.187	6.64185e-12	9.84261e-08	6.92798e-16
Susd2	5.6659e-08	-0.386199	0.034	0.396	0.00108638	3.75783e-16	-0.329666	0.02	0.356	7.20526e-12	5.6659e-08	7.51566e-16
Ttc36	4.07637e-07	-1.74083	0.661	0.743	0.00781603	4.60533e-16	-1.93064	0.727	0.776	8.83026e-12	4.07637e-07	9.21066e-16
Mtx2	8.99321e-07	0.313425	0.847	0.725	0.0172436	5.52139e-16	0.303094	0.927	0.764	1.05867e-11	8.99321e-07	1.10428e-15
Myo6	0.00107448	-0.344589	0.847	0.749	1	6.49281e-16	-0.406809	0.82	0.868	1.24493e-11	0.00107448	1.29856e-15
Cyc1	0.000535471	0.282141	0.983	0.924	1	8.59918e-16	0.433305	0.973	0.931	1.64881e-11	0.000535471	1.71984e-15
Sim1	4.57883e-14	0.312137	0.678	0.205	8.77945e-10	9.64374e-16	0.277971	0.5	0.213	1.84909e-11	4.57883e-14	1.92875e-15
Frem2	0.000168535	-0.370398	0.322	0.514	1	9.73656e-16	-0.463767	0.287	0.568	1.86689e-11	0.000168535	1.94731e-15
AI314278	1.94695e-06	-0.412176	0.051	0.36	0.0373308	1.30062e-15	-0.434531	0.013	0.337	2.49381e-11	1.94695e-06	2.60124e-15
Ndufs2	2.26408e-06	0.323928	0.983	0.9	0.0434115	1.78395e-15	0.375417	1	0.952	3.42054e-11	2.26408e-06	3.56789e-15
Gm10639	7.19845e-07	-0.915779	0.203	0.523	0.0138023	1.82499e-15	-0.891557	0.093	0.414	3.49924e-11	7.19845e-07	3.64999e-15
Bhmt2	9.54495e-05	-0.270759	0.017	0.239	1	2.291e-15	-0.447244	0.007	0.326	4.39276e-11	9.54495e-05	4.582e-15
Bcat2	1.57526e-08	0.282146	0.712	0.441	0.000302041	2.7037e-15	0.395171	0.66	0.42	5.18407e-11	1.57526e-08	5.4074e-15
Ctsd	3.63441e-05	0.259613	0.932	0.84	0.696862	3.33266e-15	0.340088	0.96	0.821	6.39004e-11	3.63441e-05	6.66532e-15
Ctsl	1.10251e-05	-0.486774	0.864	0.873	0.211395	3.62286e-15	-0.71081	0.953	0.945	6.94646e-11	1.10251e-05	7.24571e-15
Ndufa8	1.1206e-05	0.378244	0.932	0.873	0.214863	3.80275e-15	0.309207	0.993	0.928	7.29139e-11	1.1206e-05	7.6055e-15
Rpl22l1	0.000122737	-0.286847	0.949	0.921	1	4.2098e-15	-0.324365	1	0.977	8.07187e-11	0.000122737	8.4196e-15
C1qtnf4	2.91603e-08	0.285835	0.593	0.278	0.000559119	4.89013e-15	0.25844	0.54	0.255	9.37633e-11	2.91603e-08	9.78025e-15
Hes1	8.79851e-07	0.455282	0.729	0.423	0.0168703	7.99496e-15	0.476129	0.733	0.394	1.53295e-10	8.79851e-07	1.59899e-14
Rpl39	0.000336659	-0.258261	1	0.988	1	8.07695e-15	-0.29031	1	0.995	1.54867e-10	0.000336659	1.61539e-14
Hoga1	0.000145482	-0.415585	0.407	0.58	1	9.05572e-15	-0.576721	0.433	0.674	1.73634e-10	0.000145482	1.81114e-14
Cox5a	0.00124582	0.386255	1	0.949	1	9.2596e-15	0.373864	1	0.977	1.77544e-10	0.00124582	1.85192e-14
Trps1	0.000348425	-0.334968	0.508	0.634	1	1.04413e-14	-0.393972	0.453	0.713	2.00202e-10	0.000348425	2.08827e-14
Pgam2	1.26797e-06	0.675998	0.271	0.066	0.0243121	1.096e-14	0.474595	0.16	0.023	2.10148e-10	1.26797e-06	2.19201e-14
Hoxb6	3.35394e-07	0.363761	0.695	0.417	0.00643085	1.17903e-14	0.303241	0.847	0.597	2.26067e-10	3.35394e-07	2.35806e-14
Tkfc	9.87074e-11	-0.8228	0.186	0.595	1.89262e-06	1.42907e-14	-0.576877	0.22	0.514	2.74009e-10	9.87074e-11	2.85814e-14
Tacstd2	1.6051e-10	0.378396	0.458	0.112	3.07761e-06	1.4439e-14	0.265958	0.293	0.083	2.76853e-10	1.6051e-10	2.8878e-14
Gucd1	0.000391164	-0.315759	0.407	0.574	1	1.61822e-14	-0.330878	0.22	0.533	3.10277e-10	0.000391164	3.23644e-14
Gpd1	4.16924e-12	-0.822869	0.085	0.574	7.9941e-08	1.68152e-14	-0.487946	0.08	0.387	3.22415e-10	4.16924e-12	3.36304e-14
Gstz1	0.00132326	-0.403062	0.492	0.619	1	1.87634e-14	-0.546006	0.407	0.632	3.59769e-10	0.00132326	3.75267e-14
Ndufa11	0.00037869	0.326841	0.966	0.888	1	2.09495e-14	0.345708	0.987	0.907	4.01685e-10	0.00037869	4.18989e-14
Hadha	4.4068e-05	0.257756	0.932	0.767	0.84496	2.41777e-14	0.280406	0.933	0.777	4.63583e-10	4.4068e-05	4.83553e-14
Atp5g1	1.51977e-07	0.559282	1	0.973	0.00291401	2.46661e-14	0.464713	1	0.986	4.72948e-10	1.51977e-07	4.93322e-14
Ndufc2	2.19072e-05	0.303851	0.983	0.894	0.420049	2.5462e-14	0.31292	0.993	0.938	4.88208e-10	2.19072e-05	5.0924e-14
Slc22a19	4.43862e-08	-0.582033	0.017	0.384	0.000851061	2.71491e-14	-0.65607	0	0.296	5.20557e-10	4.43862e-08	5.42983e-14
Pcbd1	0.014468	-0.265737	0.915	0.84	1	2.8847e-14	-0.40977	0.933	0.927	5.53112e-10	0.014468	5.7694e-14
Hadhb	0.000290348	0.296643	0.831	0.749	1	3.2395e-14	0.357999	0.893	0.744	6.21141e-10	0.000290348	6.47899e-14
Cox4i1	0.00201751	0.257406	1	0.985	1	3.28751e-14	0.304185	1	0.997	6.30348e-10	0.00201751	6.57503e-14
Acsm2	3.70864e-12	-1.11776	0.034	0.541	7.11095e-08	3.38365e-14	-1.02227	0.02	0.318	6.48781e-10	3.70864e-12	6.7673e-14
Epha7	9.74203e-05	-0.305652	0.102	0.347	1	3.69901e-14	-0.347203	0.113	0.439	7.09247e-10	9.74203e-05	7.39801e-14
Clic4	5.37802e-06	-0.392176	0.441	0.68	0.103118	4.05651e-14	-0.353802	0.593	0.792	7.77795e-10	5.37802e-06	8.11302e-14
Aco2	0.00444263	0.42804	0.915	0.876	1	4.42309e-14	0.444185	0.967	0.931	8.48083e-10	0.00444263	8.84618e-14
Atp5l	0.00544613	0.376743	1	0.946	1	4.42334e-14	0.352773	1	0.987	8.48132e-10	0.00544613	8.84669e-14
Slc51b	1.08338e-06	-0.377474	0.017	0.329	0.0207726	4.69917e-14	-0.366947	0	0.292	9.01019e-10	1.08338e-06	9.39834e-14
Hacd4	7.33871e-07	-0.358149	0.153	0.477	0.0140713	4.74763e-14	-0.302149	0.06	0.368	9.10311e-10	7.33871e-07	9.49526e-14
Msra	3.27068e-06	-0.418265	0.254	0.544	0.062712	5.11968e-14	-0.415093	0.14	0.443	9.81647e-10	3.27068e-06	1.02394e-13
Slc22a1	9.98281e-09	-0.75821	0.068	0.462	0.00019141	5.38669e-14	-0.511401	0	0.291	1.03284e-09	9.98281e-09	1.07734e-13
Hipk2	2.93242e-06	0.354305	0.864	0.704	0.0562261	5.65145e-14	0.362707	0.873	0.705	1.08361e-09	2.93242e-06	1.13029e-13
Acot4	6.58875e-09	-0.363373	0.017	0.417	0.000126333	5.69256e-14	-0.255437	0.007	0.299	1.09149e-09	6.58875e-09	1.13851e-13
4931406C07Rik	2.06928e-07	-1.11006	0.407	0.683	0.00396764	5.72846e-14	-0.985742	0.573	0.722	1.09838e-09	2.06928e-07	1.14569e-13
Higd1a	4.55579e-08	0.351662	0.864	0.743	0.000873527	5.79036e-14	0.343729	0.92	0.759	1.11024e-09	4.55579e-08	1.15807e-13
Ankib1	8.3654e-06	-0.278742	0.254	0.526	0.160398	6.27559e-14	-0.326956	0.22	0.514	1.20328e-09	8.3654e-06	1.25512e-13
Qdpr	8.4854e-06	-0.623329	0.729	0.81	0.162699	6.73708e-14	-0.635568	0.687	0.803	1.29177e-09	8.4854e-06	1.34742e-13
Vil1	2.0051e-11	-0.467022	0.017	0.508	3.84457e-07	7.07307e-14	-0.320779	0	0.289	1.35619e-09	2.0051e-11	1.41461e-13
Aadac	1.25549e-08	-0.393223	0.017	0.414	0.000240728	7.21809e-14	-0.299649	0.007	0.298	1.384e-09	1.25549e-08	1.44362e-13
Usmg5	0.0154347	0.258616	0.949	0.912	1	7.48441e-14	0.330012	1	0.947	1.43506e-09	0.0154347	1.49688e-13
Slc5a1	1.57216e-05	-0.326738	0.017	0.278	0.301445	8.24908e-14	-0.420968	0.06	0.366	1.58168e-09	1.57216e-05	1.64982e-13
Ass1	8.45963e-11	-1.61632	0.203	0.616	1.62205e-06	8.38753e-14	-1.40734	0.113	0.409	1.60823e-09	8.45963e-11	1.67751e-13
Myo5b	0.000376564	-0.315956	0.441	0.613	1	1.01261e-13	-0.360797	0.5	0.709	1.94159e-09	0.000376564	2.02523e-13
Gabarap	8.53578e-05	-0.317023	0.932	0.931	1	1.07826e-13	-0.284454	0.993	0.975	2.06746e-09	8.53578e-05	2.15652e-13
Fmc1	5.76435e-05	0.314906	0.864	0.74	1	1.10122e-13	0.306184	0.927	0.763	2.11147e-09	5.76435e-05	2.20243e-13
Snx7	0.00104051	-0.303988	0.39	0.565	1	1.21763e-13	-0.415937	0.28	0.539	2.33467e-09	0.00104051	2.43525e-13
Ezr	0.00808641	-0.259416	0.983	0.843	1	1.22899e-13	-0.373927	1	0.967	2.35646e-09	0.00808641	2.45798e-13
Slc25a30	0.0302008	0.315718	0.525	0.411	1	1.3972e-13	0.404646	0.587	0.332	2.679e-09	0.0302008	2.79441e-13
Ftl1	1.11444e-06	-0.568008	1	0.997	0.0213684	1.40918e-13	-0.529549	1	1	2.70196e-09	1.11444e-06	2.81835e-13
Tpgs1	1.12995e-07	0.268625	0.814	0.535	0.00216656	1.50776e-13	0.296538	0.753	0.571	2.89097e-09	1.12995e-07	3.01551e-13
Bex4	0.00234651	0.256759	0.627	0.498	1	1.76073e-13	0.269471	0.6	0.321	3.37602e-09	0.00234651	3.52145e-13
Lamp2	7.02576e-07	-0.569635	0.712	0.825	0.0134712	1.92198e-13	-0.505097	0.8	0.874	3.6852e-09	7.02576e-07	3.84395e-13
Sdhb	3.8521e-05	0.356435	0.932	0.861	0.738601	1.97493e-13	0.392414	0.967	0.894	3.78673e-09	3.8521e-05	3.94986e-13
Fstl3	2.06672e-07	0.251554	0.424	0.172	0.00396274	2.0323e-13	0.331619	0.553	0.295	3.89674e-09	2.06672e-07	4.06461e-13
Gsta2	4.38388e-08	-0.852828	0.068	0.45	0.000840565	2.65805e-13	-0.842399	0.073	0.359	5.09654e-09	4.38388e-08	5.3161e-13
Ndufs4	0.000137534	0.312623	0.915	0.837	1	2.72416e-13	0.311397	0.92	0.87	5.22331e-09	0.000137534	5.44832e-13
Atp5j	0.000108449	0.259759	0.983	0.937	1	3.16221e-13	0.287509	1	0.984	6.06322e-09	0.000108449	6.32442e-13
Akr1a1	5.0751e-05	-0.4819	0.915	0.903	0.9731	3.6699e-13	-0.409099	0.973	0.966	7.03666e-09	5.0751e-05	7.33979e-13
Vegfb	5.70058e-06	0.331987	0.814	0.619	0.109303	3.74923e-13	0.278923	0.84	0.616	7.18877e-09	5.70058e-06	7.49846e-13
Ap2b1	1.92901e-06	0.341227	0.763	0.589	0.0369869	3.91218e-13	0.254751	0.847	0.649	7.50121e-09	1.92901e-06	7.82435e-13
Cox6c	0.0178811	0.279812	0.983	0.988	1	4.05522e-13	0.404094	1	0.991	7.77547e-09	0.0178811	8.11044e-13
Pgm3	4.8491e-06	-0.278716	0.237	0.538	0.0929767	5.56667e-13	-0.321794	0.287	0.567	1.06735e-08	4.8491e-06	1.11333e-12
Apom	1.08425e-06	-0.49703	0.051	0.369	0.0207894	6.04382e-13	-0.444107	0.02	0.296	1.15884e-08	1.08425e-06	1.20876e-12
Irx1	9.60214e-06	0.746292	0.441	0.208	0.184111	6.38398e-13	0.646985	0.573	0.336	1.22406e-08	9.60214e-06	1.2768e-12
C130074G19Rik	6.92014e-06	-0.337028	0.136	0.462	0.132687	6.94607e-13	-0.361037	0.16	0.455	1.33184e-08	6.92014e-06	1.38921e-12
Fbp2	4.11895e-09	-0.711312	0.034	0.441	7.89767e-05	7.08104e-13	-0.347388	0.013	0.29	1.35772e-08	4.11895e-09	1.41621e-12
Ostc	0.0215636	-0.266527	0.847	0.819	1	7.40163e-13	-0.344221	0.813	0.873	1.41919e-08	0.0215636	1.48033e-12
Galnt11	1.03102e-07	-0.830219	0.508	0.707	0.00197687	7.52508e-13	-0.788957	0.513	0.691	1.44286e-08	1.03102e-07	1.50502e-12
Uqcrb	0.000231204	0.307087	0.966	0.937	1	8.05388e-13	0.317442	0.993	0.975	1.54425e-08	0.000231204	1.61078e-12
Ascc1	2.5055e-07	-0.591339	0.508	0.719	0.00480404	8.41329e-13	-0.462063	0.527	0.716	1.61316e-08	2.5055e-07	1.68266e-12
Ndufa10	5.34171e-05	0.269827	0.949	0.876	1	9.25725e-13	0.258649	0.96	0.913	1.77498e-08	5.34171e-05	1.85145e-12
Slc12a3	1.04034e-12	1.92911	0.271	0.027	1.99475e-08	5.88419e-09	1.7016	0.153	0.039	0.000112823	5.88419e-09	2.08068e-12
Atpif1	2.99714e-11	-0.4885	0.983	0.97	5.74672e-07	1.15247e-12	-0.33771	1	0.993	2.20974e-08	2.99714e-11	2.30493e-12
Defb1	0.00146778	0.679973	0.22	0.082	1	1.38593e-12	0.360773	0.187	0.038	2.65738e-08	0.00146778	2.77186e-12
Fhl1	8.4442e-05	-0.317825	0.339	0.559	1	1.44554e-12	-0.341603	0.187	0.493	2.77167e-08	8.4442e-05	2.89107e-12
Cmbl	6.51937e-07	-0.396352	0.034	0.36	0.0125002	1.84351e-12	-0.43381	0.013	0.28	3.53474e-08	6.51937e-07	3.68701e-12
Cyp2d26	2.84614e-10	-1.20052	0.034	0.48	5.4572e-06	2.29928e-12	-0.788581	0.027	0.294	4.40865e-08	2.84614e-10	4.59857e-12
Ier3	0.000108325	0.65072	0.492	0.281	1	2.34819e-12	0.441159	0.473	0.227	4.50241e-08	0.000108325	4.69637e-12
Apoe	0.0688895	0.63185	0.695	0.662	1	3.02939e-12	1.16874	0.713	0.499	5.80855e-08	0.0688895	6.05878e-12
Lgr4	0.0107108	-0.299623	0.508	0.616	1	3.56071e-12	-0.425179	0.567	0.739	6.8273e-08	0.0107108	7.12141e-12
Mrps17	0.00762987	-0.271021	0.661	0.746	1	3.77895e-12	-0.466911	0.86	0.847	7.24576e-08	0.00762987	7.5579e-12
Tmigd1	5.25507e-05	-0.27844	0.017	0.254	1	4.14577e-12	-0.402542	0.013	0.273	7.9491e-08	5.25507e-05	8.29155e-12
Abca3	0.00721094	-0.316869	0.441	0.568	1	4.25984e-12	-0.359575	0.42	0.632	8.16782e-08	0.00721094	8.51968e-12
Gatm	4.53283e-08	-1.35188	0.119	0.474	0.000869124	4.76515e-12	-1.12991	0.047	0.313	9.1367e-08	4.53283e-08	9.53031e-12
Ugp2	1.81668e-06	-0.395123	0.475	0.692	0.0348329	5.14765e-12	-0.40625	0.513	0.701	9.87011e-08	1.81668e-06	1.02953e-11
Slc7a13	3.06622e-07	-0.639503	0.034	0.372	0.00587917	7.01362e-12	-0.450261	0.02	0.279	1.34479e-07	3.06622e-07	1.40272e-11
Jund	0.09499	-0.290458	0.898	0.852	1	7.16029e-12	-0.449333	0.973	0.949	1.37291e-07	0.09499	1.43206e-11
Atp5f1	0.000116604	0.347474	0.983	0.949	1	7.96854e-12	0.304403	0.993	0.986	1.52789e-07	0.000116604	1.59371e-11
Plscr2	2.03999e-06	-0.707806	0.458	0.671	0.0391148	8.05719e-12	-0.526023	0.653	0.759	1.54489e-07	2.03999e-06	1.61144e-11
Nme1	0.00443795	-0.25828	0.898	0.885	1	8.98318e-12	-0.422716	0.913	0.929	1.72243e-07	0.00443795	1.79664e-11
Wwc2	0.00115372	0.293014	0.831	0.686	1	9.28155e-12	0.269063	0.933	0.797	1.77964e-07	0.00115372	1.85631e-11
Cfi	2.67173e-07	-0.329043	0.017	0.36	0.00512277	1.08397e-11	-0.252414	0.013	0.266	2.0784e-07	2.67173e-07	2.16794e-11
Abhd14a	0.000879033	-0.327552	0.525	0.616	1	1.12491e-11	-0.437035	0.627	0.719	2.1569e-07	0.000879033	2.24982e-11
H2afy2	0.000649817	-0.324419	0.424	0.607	1	1.15976e-11	-0.296031	0.253	0.539	2.22372e-07	0.000649817	2.31952e-11
Clec18a	1.22237e-11	-0.697755	0.356	0.728	2.34376e-07	9.73203e-05	-0.25986	0.273	0.407	1	9.73203e-05	2.44473e-11
Gpr137b	1.78396e-06	-0.393258	0.119	0.426	0.0342057	1.25961e-11	-0.319414	0.107	0.37	2.41517e-07	1.78396e-06	2.51921e-11
Tshz2	9.70894e-08	-0.489939	0.169	0.526	0.00186159	1.26191e-11	-0.377038	0.133	0.421	2.41958e-07	9.70894e-08	2.52381e-11
Cox6b2	6.85448e-08	0.348603	0.61	0.308	0.00131428	1.29665e-11	0.262362	0.447	0.226	2.4862e-07	6.85448e-08	2.5933e-11
Vps35	0.000571382	-0.310774	0.695	0.737	1	1.31478e-11	-0.338435	0.727	0.826	2.52096e-07	0.000571382	2.62956e-11
S100g	0.00143436	-0.711339	0.508	0.335	1	1.38563e-11	-0.506396	0.493	0.246	2.6568e-07	0.00143436	2.77125e-11
Acsm1	1.80381e-05	-0.311626	0	0.251	0.345863	1.50729e-11	-0.48249	0.013	0.263	2.89008e-07	1.80381e-05	3.01458e-11
Uqcr10	0.000557572	0.251166	1	0.937	1	1.62367e-11	0.274407	0.993	0.973	3.11323e-07	0.000557572	3.24734e-11
Arhgap10	9.52228e-10	-0.312408	0.119	0.547	1.8258e-05	1.70399e-11	-0.254895	0.14	0.425	3.26723e-07	9.52228e-10	3.40798e-11
Ckb	6.62371e-06	0.486684	0.508	0.251	0.127003	1.75408e-11	0.404939	0.413	0.188	3.36328e-07	6.62371e-06	3.50816e-11
Tpcn1	0.000103393	-0.39453	0.288	0.526	1	1.78578e-11	-0.284601	0.26	0.532	3.42405e-07	0.000103393	3.57155e-11
Hoxb7	2.80064e-09	0.308816	0.814	0.511	5.36995e-05	1.79934e-11	0.28987	0.813	0.642	3.45005e-07	2.80064e-09	3.59868e-11
Tmbim6	0.00299237	-0.277746	0.915	0.888	1	1.87147e-11	-0.347449	0.993	0.96	3.58835e-07	0.00299237	3.74293e-11
Kcnj15	3.27518e-07	-0.425448	0.017	0.35	0.00627982	1.88088e-11	-0.284166	0.013	0.262	3.6064e-07	3.27518e-07	3.76176e-11
Mcee	1.29853e-06	0.305592	0.949	0.755	0.0248981	2.18432e-11	0.267932	0.913	0.815	4.18821e-07	1.29853e-06	4.36863e-11
Tyw3	0.00521447	-0.26453	0.271	0.405	1	2.46949e-11	-0.518776	0.187	0.445	4.735e-07	0.00521447	4.93898e-11
Sat1	8.70988e-08	-0.733419	0.441	0.674	0.00167003	2.58659e-11	-0.564958	0.527	0.691	4.95953e-07	8.70988e-08	5.17319e-11
Pla2g16	0.00090365	-0.358079	0.407	0.568	1	2.62718e-11	-0.344832	0.46	0.657	5.03735e-07	0.00090365	5.25435e-11
Hoxb4	7.34926e-09	0.511473	0.746	0.483	0.000140915	2.68437e-11	0.336926	0.84	0.631	5.14701e-07	7.34926e-09	5.36874e-11
Gpm6a	1.01625e-07	-0.345992	0.051	0.408	0.00194856	2.79058e-11	-0.279685	0.067	0.332	5.35065e-07	1.01625e-07	5.58115e-11
Gnai2	0.00190279	-0.308009	0.695	0.773	1	2.85396e-11	-0.300707	0.767	0.84	5.47219e-07	0.00190279	5.70792e-11
2310039H08Rik	0.0192687	-0.277049	0.763	0.701	1	2.88298e-11	-0.394698	0.713	0.784	5.52783e-07	0.0192687	5.76597e-11
Hmgcs1	0.000446014	-0.628239	0.881	0.831	1	2.94166e-11	-0.699452	0.793	0.841	5.64033e-07	0.000446014	5.88331e-11
Tmem45b	0.000136146	-0.271339	0.051	0.278	1	3.25028e-11	-0.292248	0	0.238	6.23208e-07	0.000136146	6.50056e-11
Atp6v1g1	0.000114372	-0.469861	0.932	0.897	1	3.75726e-11	-0.357334	0.993	0.963	7.20418e-07	0.000114372	7.51453e-11
Slc22a12	4.9624e-07	-0.39629	0.017	0.344	0.00951491	3.78229e-11	-0.279716	0.007	0.245	7.25217e-07	4.9624e-07	7.56459e-11
Spp1	0.00848585	0.299885	0.627	0.423	1	5.73322e-11	0.489269	0.533	0.271	1.09929e-06	0.00848585	1.14664e-10
Aqp1	2.71787e-07	-0.552968	0.034	0.372	0.00521124	6.51941e-11	-0.490965	0.027	0.268	1.25003e-06	2.71787e-07	1.30388e-10
Tmem256	0.0329605	-0.278354	0.847	0.813	1	7.19492e-11	-0.356092	0.88	0.896	1.37955e-06	0.0329605	1.43898e-10
Gkap1	1.28464e-08	-0.578493	0.61	0.785	0.000246317	7.83661e-11	-0.427722	0.607	0.751	1.50259e-06	1.28464e-08	1.56732e-10
Agxt2	9.0472e-06	-0.255067	0.017	0.287	0.173471	8.01273e-11	-0.271211	0.007	0.239	1.53636e-06	9.0472e-06	1.60255e-10
Hacl1	8.84311e-05	-0.302672	0.186	0.426	1	8.5413e-11	-0.348591	0.16	0.425	1.63771e-06	8.84311e-05	1.70826e-10
Acadm	0.116686	-0.404576	0.881	0.795	1	1.08199e-10	-0.554043	0.933	0.924	2.07461e-06	0.116686	2.16398e-10
Igfbp4	1.08465e-10	-0.766773	0.678	0.873	2.0797e-06	2.44177e-07	-0.520997	0.613	0.698	0.00468185	2.44177e-07	2.16929e-10
Gpx3	3.43779e-08	-1.62165	0.203	0.574	0.000659162	1.1017e-10	-1.39142	0.153	0.396	2.1124e-06	3.43779e-08	2.2034e-10
Kif12	0.0010462	-0.316768	0.61	0.671	1	1.30914e-10	-0.384401	0.733	0.826	2.51014e-06	0.0010462	2.61827e-10
Uqcrfs1	0.00240743	0.311802	0.949	0.906	1	1.75007e-10	0.276069	0.987	0.95	3.35558e-06	0.00240743	3.50014e-10
Dhfr	7.40211e-06	-0.402457	0.339	0.616	0.141928	2.26023e-10	-0.314789	0.207	0.47	4.33377e-06	7.40211e-06	4.52047e-10
Mettl7b	2.43301e-07	-0.474397	0.034	0.375	0.00466505	2.41329e-10	-0.384244	0.013	0.239	4.62724e-06	2.43301e-07	4.82658e-10
Mep1b	1.47298e-06	-0.713359	0.017	0.323	0.0282429	2.4259e-10	-0.67666	0.013	0.239	4.65141e-06	1.47298e-06	4.85179e-10
Cndp1	4.50146e-07	-0.280491	0.017	0.344	0.0086311	2.58563e-10	-0.272281	0.027	0.257	4.95769e-06	4.50146e-07	5.17126e-10
Lap3	0.000453217	-0.415108	0.78	0.785	1	2.93092e-10	-0.520325	0.76	0.825	5.61974e-06	0.000453217	5.86183e-10
Zfp503	2.5942e-08	0.647692	0.763	0.574	0.000497411	2.95385e-10	0.485996	0.68	0.574	5.66372e-06	2.5942e-08	5.90771e-10
Slc17a1	1.06606e-07	-0.571921	0.017	0.369	0.00204406	3.0082e-10	-0.539304	0.027	0.254	5.76793e-06	1.06606e-07	6.01641e-10
Eci3	7.54645e-07	-0.267672	0.017	0.338	0.0144696	3.09306e-10	-0.304252	0.007	0.229	5.93064e-06	7.54645e-07	6.18612e-10
Eps8	0.000134494	-0.377084	0.407	0.616	1	3.2676e-10	-0.301037	0.353	0.641	6.2653e-06	0.000134494	6.5352e-10
Fmo2	8.13033e-06	-0.464872	0.034	0.314	0.155891	3.4664e-10	-0.436397	0.02	0.246	6.64647e-06	8.13033e-06	6.93279e-10
Ndufab1	0.000759473	0.27703	0.966	0.9	1	4.48785e-10	0.26089	0.993	0.962	8.605e-06	0.000759473	8.97569e-10
Acy1	1.49711e-05	-0.329815	0.186	0.468	0.287057	5.90101e-10	-0.453061	0.233	0.483	1.13146e-05	1.49711e-05	1.1802e-09
Cda	7.26887e-05	-0.254323	0.068	0.308	1	8.65804e-10	-0.313421	0.047	0.277	1.66009e-05	7.26887e-05	1.73161e-09
Bzw2	1.14585e-06	0.354978	0.881	0.665	0.0219706	1.11015e-09	0.250206	0.92	0.726	2.1286e-05	1.14585e-06	2.22029e-09
Ppt2	0.00338392	-0.268834	0.525	0.622	1	1.23656e-09	-0.348361	0.467	0.651	2.37099e-05	0.00338392	2.47313e-09
Emid1	1.26929e-09	-0.706513	0.39	0.707	2.43373e-05	0.0003146	-0.281596	0.313	0.428	1	0.0003146	2.53857e-09
Ak4	2.46151e-05	-0.266134	0.085	0.356	0.47197	1.53963e-09	-0.258915	0.14	0.381	2.95208e-05	2.46151e-05	3.07926e-09
Csad	5.24507e-06	-0.715549	0.508	0.701	0.100569	2.33129e-09	-0.678499	0.46	0.621	4.47001e-05	5.24507e-06	4.66257e-09
Scrn2	2.20248e-05	-0.37506	0.441	0.656	0.422304	2.60492e-09	-0.368408	0.54	0.678	4.99467e-05	2.20248e-05	5.20984e-09
Pcx	7.78343e-07	-0.849367	0.203	0.508	0.0149239	3.07791e-09	-0.613387	0.14	0.355	5.90159e-05	7.78343e-07	6.15582e-09
Slc7a12	0.00016377	-0.351882	0	0.202	1	3.23527e-09	-0.457562	0	0.197	6.2033e-05	0.00016377	6.47054e-09
Aldh7a1	0.00159761	-0.338697	0.593	0.701	1	3.72485e-09	-0.320634	0.72	0.773	7.14203e-05	0.00159761	7.4497e-09
Renbp	1.92652e-05	-0.392143	0.169	0.432	0.36939	4.00246e-09	-0.269847	0.153	0.392	7.67432e-05	1.92652e-05	8.00493e-09
Hgd	1.64149e-05	-0.417467	0.017	0.275	0.31474	4.08786e-09	-0.344	0	0.194	7.83806e-05	1.64149e-05	8.17572e-09
Slc17a3	4.39284e-07	-0.435717	0.017	0.344	0.00842284	4.30181e-09	-0.405267	0.013	0.215	8.24829e-05	4.39284e-07	8.60362e-09
Acat2	0.000320176	-0.313746	0.39	0.595	1	4.77836e-09	-0.280175	0.28	0.51	9.16203e-05	0.000320176	9.55673e-09
Sardh	1.15251e-05	-0.467655	0.322	0.562	0.220982	6.75633e-09	-0.364696	0.173	0.384	0.000129546	1.15251e-05	1.35127e-08
Atp5k	0.0125179	0.257628	1	0.979	1	6.8088e-09	0.256137	1	0.982	0.000130552	0.0125179	1.36176e-08
Ugt2b37	8.59065e-09	-0.925134	0.017	0.42	0.000164717	8.5465e-07	-0.452732	0.013	0.164	0.0163871	8.5465e-07	1.71813e-08
Slc19a1	2.75724e-05	-0.358482	0.288	0.535	0.528672	9.17546e-09	-0.360112	0.367	0.547	0.00017593	2.75724e-05	1.83509e-08
Erich4	1.40731e-05	-0.37521	0.017	0.284	0.269837	9.21183e-09	-0.254723	0	0.187	0.000176628	1.40731e-05	1.84237e-08
Slc25a10	0.0136499	-0.256941	0.424	0.55	1	1.10858e-08	-0.377429	0.267	0.466	0.000212559	0.0136499	2.21716e-08
Cdkn1a	1.23191e-08	-0.687084	0.254	0.604	0.000236207	9.47095e-06	-0.55598	0.487	0.6	0.181596	9.47095e-06	2.46382e-08
Fah	7.7436e-05	-0.453971	0.186	0.411	1	1.35727e-08	-0.454049	0.153	0.363	0.000260243	7.7436e-05	2.71454e-08
Mien1	0.00478131	-0.293137	0.678	0.752	1	1.93752e-08	-0.28264	0.84	0.852	0.0003715	0.00478131	3.87504e-08
Slc6a20b	0.000110958	-0.294317	0.051	0.284	1	2.22091e-08	-0.259689	0.027	0.219	0.000425837	0.000110958	4.44182e-08
Mpst	7.06226e-05	-0.404527	0.525	0.662	1	2.41497e-08	-0.375345	0.593	0.702	0.000463046	7.06226e-05	4.82994e-08
Defb19	1.19179e-05	-0.492071	0.017	0.287	0.228515	2.87473e-08	-0.416951	0.007	0.187	0.000551201	1.19179e-05	5.74947e-08
Serpina1a	5.63785e-06	-0.251243	0	0.275	0.1081	2.93706e-08	-0.274195	0.013	0.195	0.000563151	5.63785e-06	5.87411e-08
Cldn10	0.875979	0.86431	0.424	0.553	1	5.00606e-08	1.30994	0.533	0.396	0.000959862	0.875979	1.00121e-07
Enpp2	0.00014096	-0.422069	0.424	0.659	1	5.00771e-08	-0.362686	0.413	0.619	0.000960178	0.00014096	1.00154e-07
Tmsb10	0.0238324	-0.37408	0.966	0.9	1	5.16067e-08	-0.433211	0.96	0.946	0.000989506	0.0238324	1.03213e-07
Selenbp1	0.000364893	-0.405392	0.508	0.671	1	5.392e-08	-0.38299	0.593	0.7	0.00103386	0.000364893	1.0784e-07
Guca2b	4.82556e-05	-0.32811	0	0.23	0.925253	7.97012e-08	-0.261858	0	0.166	0.00152819	4.82556e-05	1.59402e-07
Rbbp7	0.000125401	-0.378428	0.797	0.837	1	8.36156e-08	-0.417061	0.84	0.868	0.00160324	0.000125401	1.67231e-07
Zfyve21	4.93643e-06	-0.411687	0.525	0.701	0.0946512	8.64927e-08	-0.359584	0.613	0.7	0.00165841	4.93643e-06	1.72985e-07
Fam162a	6.8467e-06	0.277772	0.847	0.737	0.131279	9.65188e-08	0.262329	0.88	0.82	0.00185065	6.8467e-06	1.93038e-07
Sparc	1.5336e-07	-1.05223	0.441	0.719	0.00294053	0.000185075	-0.58484	0.553	0.617	1	0.000185075	3.0672e-07
Ndrg1	1.71201e-07	-0.997692	0.254	0.562	0.00328261	8.43266e-07	-0.903617	0.353	0.502	0.0161688	8.43266e-07	3.42403e-07
Cks2	0.00208429	-0.329088	0.712	0.731	1	1.88006e-07	-0.43563	0.647	0.71	0.00360482	0.00208429	3.76012e-07
Tcn2	2.32242e-07	-0.996647	0.576	0.746	0.004453	0.000189692	-0.606485	0.767	0.735	1	0.000189692	4.64483e-07
Gpx1	0.00682318	-0.301117	0.847	0.852	1	2.53368e-07	-0.326056	0.96	0.927	0.00485808	0.00682318	5.06736e-07
Fggy	0.00348483	-0.397631	0.39	0.502	1	3.3237e-07	-0.286744	0.453	0.58	0.00637286	0.00348483	6.6474e-07
Slc22a8	6.31306e-07	-0.569547	0.085	0.417	0.0121047	4.07932e-07	-0.445163	0.06	0.236	0.0078217	6.31306e-07	8.15865e-07
Ctdspl	0.00060002	-0.293222	0.508	0.659	1	4.33521e-07	-0.272386	0.553	0.66	0.00831234	0.00060002	8.67043e-07
Lipa	0.00509148	-0.281263	0.254	0.423	1	4.43157e-07	-0.283793	0.253	0.439	0.00849709	0.00509148	8.86314e-07
Junb	0.20291	-0.300779	0.458	0.502	1	4.7058e-07	-0.563641	0.527	0.701	0.0090229	0.20291	9.4116e-07
Slc7a7	7.87441e-07	-0.577689	0.034	0.36	0.0150984	3.79864e-06	-0.311888	0.033	0.179	0.0728352	3.79864e-06	1.57488e-06
Tmem37	7.30366e-06	-0.743826	0.525	0.707	0.14004	8.4982e-07	-0.634167	0.353	0.506	0.0162945	7.30366e-06	1.69964e-06
Kap	0.0646049	-0.813757	0.034	0.109	1	8.64618e-07	-2.44764	0.08	0.249	0.0165782	0.0646049	1.72924e-06
Aco1	9.2054e-05	-0.408477	0.441	0.631	1	9.18978e-07	-0.285323	0.467	0.62	0.0176205	9.2054e-05	1.83796e-06
Tmbim4	9.49027e-07	-0.615851	0.831	0.84	0.0181966	1.86642e-06	-0.469732	0.88	0.864	0.0357867	1.86642e-06	1.89805e-06
Cltc	0.0110455	-0.327029	0.763	0.789	1	1.00267e-06	-0.315083	0.773	0.803	0.0192252	0.0110455	2.00534e-06
Car2	7.02924e-05	-0.71851	0.39	0.583	1	1.26708e-06	-0.748641	0.293	0.448	0.0242949	7.02924e-05	2.53415e-06
Slc22a13	0.000508013	-0.348491	0.034	0.224	1	1.39243e-06	-0.426133	0.02	0.169	0.0266985	0.000508013	2.78486e-06
Dnajc19	0.00163311	-0.435322	0.763	0.81	1	1.45392e-06	-0.420389	0.747	0.793	0.0278774	0.00163311	2.90783e-06
Lgmn	0.0492178	-0.370056	0.78	0.761	1	1.52564e-06	-0.353914	0.893	0.85	0.0292527	0.0492178	3.05128e-06
Por	0.00191884	-0.329695	0.576	0.668	1	2.06865e-06	-0.267542	0.593	0.701	0.0396642	0.00191884	4.13729e-06
Cib1	0.0061397	-0.283435	0.746	0.764	1	2.14501e-06	-0.29197	0.747	0.786	0.0411283	0.0061397	4.29001e-06
Uqcrq	9.349e-05	0.48705	1	0.918	1	2.68449e-06	0.326354	0.973	0.942	0.0514725	9.349e-05	5.36898e-06
Anpep	3.04527e-06	-0.657409	0.458	0.631	0.0583899	0.0339777	-0.291599	0.62	0.608	1	0.0339777	6.09052e-06
Tkt	3.09209e-06	-0.450428	0.831	0.867	0.0592878	0.0290502	-0.268699	0.84	0.822	1	0.0290502	6.18418e-06
Sord	3.83327e-06	-0.623201	0.254	0.55	0.0734991	2.37164e-05	-0.315047	0.293	0.434	0.454737	2.37164e-05	7.66653e-06
Col4a2	0.000325587	-0.436398	0.729	0.785	1	5.13213e-06	-0.341002	0.76	0.807	0.0984035	0.000325587	1.02642e-05
Bphl	0.00120569	-0.440196	0.729	0.722	1	5.32111e-06	-0.406052	0.82	0.786	0.102027	0.00120569	1.06422e-05
Cd63	0.00129619	-0.345236	0.966	0.967	1	7.13676e-06	-0.296614	1	0.993	0.13684	0.00129619	1.42735e-05
Lmna	0.000308179	-0.31414	0.525	0.686	1	8.16362e-06	-0.26493	0.487	0.621	0.156529	0.000308179	1.63272e-05
Chpt1	0.00750924	-0.458302	0.814	0.755	1	1.15574e-05	-0.682883	0.793	0.769	0.221603	0.00750924	2.31148e-05
Msn	0.000776905	-0.30995	0.39	0.58	1	1.46616e-05	-0.262352	0.36	0.502	0.281122	0.000776905	2.9323e-05
Itga1	0.00490622	-0.363879	0.593	0.686	1	1.69154e-05	-0.390192	0.767	0.74	0.324336	0.00490622	3.38305e-05
Nus1	0.000110141	-0.489122	0.492	0.665	1	1.70359e-05	-0.4455	0.593	0.655	0.326646	0.000110141	3.40715e-05
Grina	0.00141644	-0.353212	0.678	0.731	1	2.01351e-05	-0.302396	0.733	0.767	0.38607	0.00141644	4.02698e-05
Cryl1	2.65001e-05	-0.591633	0.237	0.486	0.508114	0.018418	-0.418631	0.24	0.293	1	0.018418	5.29996e-05
Tpm4	0.00377791	-0.271566	0.559	0.695	1	3.08875e-05	-0.299986	0.633	0.731	0.592237	0.00377791	6.17741e-05
Atp2b1	0.00646574	-0.396207	0.864	0.825	1	3.62603e-05	-0.367191	0.893	0.827	0.695255	0.00646574	7.25193e-05
Grhpr	0.000152708	-0.537708	0.797	0.798	1	4.09829e-05	-0.373385	0.92	0.87	0.785806	0.000152708	8.19641e-05
Pdzk1ip1	5.92879e-05	-0.941792	0.627	0.722	1	0.163639	-0.481376	0.733	0.658	1	0.163639	0.000118572
Acmsd	0.000213524	-0.507797	0	0.196	1	6.37908e-05	-0.269739	0.007	0.11	1	0.000213524	0.000127578
Asl	7.2885e-05	-0.535492	0.458	0.64	1	0.000554621	-0.274778	0.52	0.617	1	0.000554621	0.000145765
Lgals1	0.100783	-0.311682	0.441	0.52	1	7.77623e-05	-0.250985	0.307	0.456	1	0.100783	0.000155519
Aldh4a1	0.00162195	-0.393122	0.39	0.547	1	8.15339e-05	-0.305958	0.36	0.484	1	0.00162195	0.000163061
Hbegf	0.000590859	-0.354505	0.186	0.402	1	8.89521e-05	-0.359129	0.213	0.357	1	0.000590859	0.000177896
Vcan	0.0355299	-0.310843	0.22	0.32	1	0.000151497	-0.27444	0.133	0.262	1	0.0355299	0.000302971
Pepd	0.00230017	-0.357663	0.729	0.798	1	0.000276576	-0.282384	0.907	0.814	1	0.00230017	0.000553076
Rnf181	0.00149691	-0.31506	0.407	0.568	1	0.000276655	-0.275556	0.387	0.479	1	0.00149691	0.000553233
Dbi	0.0604212	-0.496435	0.949	0.918	1	0.00029025	-0.523696	0.987	0.965	1	0.0604212	0.000580416
Ncam1	0.00126436	-0.486074	0.593	0.71	1	0.000318255	-0.317008	0.533	0.647	1	0.00126436	0.000636409
Fabp3	0.107942	0.350902	0.746	0.722	1	0.000369399	0.257779	0.74	0.58	1	0.107942	0.000738662
Trp53bp2	0.0283659	-0.291517	0.475	0.547	1	0.000590342	-0.319998	0.587	0.657	1	0.0283659	0.00118034
Jun	0.033091	-0.480869	0.678	0.686	1	0.000758522	-0.359615	0.827	0.849	1	0.033091	0.00151647
Acox1	0.00925491	-0.28292	0.475	0.565	1	0.0010444	-0.277132	0.473	0.566	1	0.00925491	0.00208771
Abracl	0.00144764	-0.287865	0.661	0.71	1	0.00124433	-0.259709	0.693	0.745	1	0.00144764	0.00248712
Cela1	0.00186704	-0.730042	0.373	0.52	1	0.0414053	-0.330792	0.333	0.392	1	0.0414053	0.0037306
Gstm1	0.00219927	-0.344313	0.458	0.586	1	0.0037848	-0.339151	0.467	0.53	1	0.0037848	0.00439371
Lhx1	0.00308448	0.35784	0.559	0.411	1	0.00290205	0.321912	0.527	0.421	1	0.00308448	0.00579568
Emx1	0.00320796	0.574739	0.322	0.199	1	0.0104135	0.261031	0.2	0.136	1	0.0104135	0.00640563
Akap12	0.00351806	-0.432996	0.136	0.32	1	0.00450303	-0.409083	0.14	0.237	1	0.00450303	0.00702375
Acot13	0.00434783	-0.486205	0.797	0.795	1	0.00405654	-0.395109	0.853	0.812	1	0.00434783	0.00809662
H19	0.00538356	-0.79959	0.475	0.571	1	0.0116185	-0.271373	0.273	0.356	1	0.0116185	0.0107381
Cryab	0.0589253	-1.08447	0.119	0.221	1	0.00588631	-1.04295	0.093	0.18	1	0.0589253	0.011738
Gm42418	0.011997	-0.817112	1	1	1	0.00615036	-0.39644	1	1	1	0.011997	0.0122629
Dcxr	0.0130376	-0.484043	0.542	0.604	1	0.0291546	-0.354562	0.58	0.564	1	0.0291546	0.0259052
Cdkn1c	0.0415722	-0.623149	0.661	0.71	1	0.0142942	-0.376708	0.467	0.55	1	0.0415722	0.0283841
Fabp5	0.062562	-0.485922	0.576	0.613	1	0.156487	-0.290532	0.467	0.481	1	0.156487	0.12121
Meg3	0.0641288	-0.941456	0.22	0.314	1	0.985388	-0.592554	0.193	0.189	1	0.985388	0.124145
Vim	0.184003	-0.442428	0.576	0.631	1	0.267809	-0.380036	0.52	0.537	1	0.267809	0.334149
Tagln	0.233931	-0.289082	0.136	0.193	1	0.514815	-0.282936	0.16	0.139	1	0.514815	0.413138
Tuba1a	0.62695	-0.516772	0.542	0.565	1	0.254244	-0.377862	0.453	0.456	1	0.62695	0.443847
Fabp4	0.307411	-0.440876	0.305	0.35	1	0.347549	0.387684	0.393	0.347	1	0.347549	0.520321
Wnk1	0.319557	0.6834	0.678	0.677	1	0.322742	0.511632	0.613	0.611	1	0.322742	0.536998
Krt8	0.937921	-0.255973	0.881	0.701	1	0.392502	-0.378552	0.813	0.674	1	0.937921	0.630946
Fxyd2	0.642043	0.320061	0.78	0.9	1	0.454704	0.411663	0.833	0.869	1	0.642043	0.702652

## Sheet: N.tubule.3_IM1.Mut.CTRL.marker
Gene	Mutant_p_val	Mutant_avg_logFC	Mutant_pct.1	Mutant_pct.2	Mutant_p_val_adj	CTRL_p_val	CTRL_avg_logFC	CTRL_pct.1	CTRL_pct.2	CTRL_p_val_adj	max_pval	minimump_p_val
Wnt16	1.95769e-32	0.353496	0.391	0	3.75368e-28	1.64326e-57	0.666727	0.361	0.015	3.15079e-53	1.95769e-32	3.28653e-57
Rspo1	1.85319e-30	0.903311	0.717	0.09	3.55331e-26	3.27911e-54	0.649139	0.496	0.055	6.28736e-50	1.85319e-30	6.55821e-54
Hnrnpa1	1.14315e-16	0.882263	1	0.84	2.19188e-12	8.68206e-43	0.765134	1	0.893	1.6647e-38	1.14315e-16	1.73641e-42
Ptma	4.22616e-13	0.659178	1	0.977	8.10325e-09	5.05096e-39	0.66695	1	0.989	9.68472e-35	4.22616e-13	1.01019e-38
Gm266	5.55811e-19	0.906041	0.957	0.422	1.06571e-14	1.22655e-38	0.967823	0.874	0.413	2.35179e-34	5.55811e-19	2.4531e-38
Arl4c	1.1747e-16	0.738311	0.935	0.456	2.25237e-12	4.56781e-37	0.841534	0.899	0.458	8.75831e-33	1.1747e-16	9.13561e-37
Atp1b1	3.06922e-18	-1.75289	0.891	0.956	5.88493e-14	5.74183e-34	-1.22968	0.874	0.967	1.10094e-29	3.06922e-18	1.14837e-33
Ggt1	1.1404e-12	-1.56881	0.522	0.82	2.1866e-08	1.84478e-33	-1.55914	0.681	0.881	3.53718e-29	1.1404e-12	3.68955e-33
Acadm	9.0607e-10	-1.03936	0.696	0.823	1.7373e-05	2.48618e-33	-0.988515	0.815	0.939	4.76701e-29	9.0607e-10	4.97237e-33
Npm1	9.71008e-15	0.715693	1	0.942	1.86181e-10	3.84812e-33	0.607866	1	0.983	7.37838e-29	9.71008e-15	7.69623e-33
Cd63	6.63851e-12	-0.825494	1	0.962	1.27287e-07	1.41759e-32	-0.782782	0.992	0.995	2.71809e-28	6.63851e-12	2.83519e-32
Ctxn1	6.38257e-14	0.593032	0.848	0.451	1.22379e-09	4.12978e-32	0.564813	0.874	0.393	7.91844e-28	6.38257e-14	8.25956e-32
H3f3a	2.66449e-18	0.775887	1	0.942	5.1089e-14	1.38844e-31	0.488929	1	0.981	2.6622e-27	2.66449e-18	2.77688e-31
Tubb5	3.03366e-12	0.692453	0.978	0.834	5.81675e-08	1.71342e-31	0.801154	0.983	0.83	3.28532e-27	3.03366e-12	3.42684e-31
Cav1	2.13132e-08	0.285296	0.478	0.151	0.00040866	2.11967e-31	0.347383	0.403	0.066	4.06426e-27	2.13132e-08	4.23934e-31
Mdk	3.3091e-12	1.02378	0.913	0.672	6.34486e-08	2.20818e-31	1.04744	0.941	0.653	4.23397e-27	3.3091e-12	4.41636e-31
Fscn1	6.32918e-09	0.390354	0.739	0.372	0.000121356	7.73405e-30	0.447073	0.756	0.291	1.48293e-25	6.32918e-09	1.54681e-29
Prmt1	5.3776e-12	0.586414	0.978	0.805	1.0311e-07	9.86217e-30	0.522952	0.992	0.879	1.89097e-25	5.3776e-12	1.97243e-29
Stmn1	3.62706e-11	0.682324	1	0.701	6.95453e-07	1.54937e-29	0.814034	0.941	0.621	2.97077e-25	3.62706e-11	3.09875e-29
Ndnf	3.65937e-11	0.465554	0.304	0.041	7.01648e-07	2.929e-29	0.286277	0.227	0.016	5.61606e-25	3.65937e-11	5.858e-29
Igfbp2	4.24977e-24	1.53504	0.804	0.206	8.14851e-20	6.85752e-29	0.990314	0.445	0.097	1.31486e-24	4.24977e-24	1.3715e-28
Atp1a1	1.96757e-16	-1.67497	0.848	0.968	3.77262e-12	5.14788e-28	-1.35042	0.899	0.956	9.87054e-24	1.96757e-16	1.02958e-27
Atp6v1a	4.87735e-09	-0.808808	0.609	0.808	9.35182e-05	1.42525e-27	-0.749888	0.689	0.897	2.73277e-23	4.87735e-09	2.8505e-27
Tead2	3.14335e-16	0.69821	0.826	0.331	6.02706e-12	1.99572e-27	0.439465	0.807	0.37	3.82659e-23	3.14335e-16	3.99144e-27
Snrpd1	7.31387e-09	0.407016	1	0.779	0.000140236	3.25192e-27	0.481382	0.975	0.843	6.23523e-23	7.31387e-09	6.50384e-27
Rbp1	9.41719e-19	0.875967	0.935	0.471	1.80565e-14	3.67469e-27	0.61444	0.706	0.269	7.04586e-23	9.41719e-19	7.34938e-27
Rcn3	1.42185e-18	0.524265	0.957	0.384	2.72626e-14	8.78582e-27	0.424701	0.655	0.236	1.68459e-22	1.42185e-18	1.75716e-26
Ctsh	4.65103e-08	-0.664972	0.217	0.605	0.000891789	1.97186e-26	-0.82887	0.227	0.704	3.78085e-22	4.65103e-08	3.94373e-26
Aldh1a2	2.67011e-15	0.788155	0.913	0.468	5.11966e-11	2.57814e-26	0.766701	0.941	0.654	4.94332e-22	2.67011e-15	5.15628e-26
Hsp90ab1	1.09963e-14	0.556092	1	0.983	2.10844e-10	3.27172e-26	0.406918	1	0.993	6.2732e-22	1.09963e-14	6.54345e-26
Lfng	1.81275e-16	0.429545	0.587	0.122	3.47577e-12	6.84704e-26	0.536002	0.546	0.155	1.31285e-21	1.81275e-16	1.36941e-25
2010111I01Rik	9.44369e-11	0.524513	0.848	0.509	1.81073e-06	8.57546e-26	0.628879	0.815	0.454	1.64426e-21	9.44369e-11	1.71509e-25
Osr2	2.20176e-17	1.46402	0.826	0.355	4.22166e-13	3.3841e-25	1.08567	0.739	0.412	6.48867e-21	2.20176e-17	6.76819e-25
Hnrnpk	1.25162e-10	0.480003	1	0.881	2.39985e-06	3.80493e-25	0.378592	1	0.95	7.29557e-21	1.25162e-10	7.60985e-25
Srgap1	7.20239e-17	0.653499	0.761	0.265	1.38099e-12	4.7908e-25	0.456722	0.613	0.213	9.18588e-21	7.20239e-17	9.5816e-25
Tmbim6	5.67853e-10	-0.663491	0.913	0.89	1.0888e-05	9.8513e-25	-0.615572	0.966	0.964	1.88889e-20	5.67853e-10	1.97026e-24
Hmgb1	1.30873e-10	0.684584	0.978	0.875	2.50936e-06	1.23904e-24	0.581363	1	0.946	2.37574e-20	1.30873e-10	2.47809e-24
Gxylt2	8.18564e-13	0.282738	0.543	0.137	1.56951e-08	1.3155e-24	0.282297	0.403	0.089	2.52234e-20	8.18564e-13	2.631e-24
Fxyd2	3.67794e-17	-2.61854	0.717	0.904	7.05208e-13	1.70073e-24	-2.05389	0.739	0.879	3.26098e-20	3.67794e-17	3.40146e-24
Tmsb10	1.34998e-13	0.726321	1	0.898	2.58844e-09	1.79335e-24	0.665537	1	0.941	3.43857e-20	1.34998e-13	3.5867e-24
Set	1.95259e-10	0.552815	0.978	0.852	3.7439e-06	1.79614e-24	0.46292	0.975	0.931	3.44391e-20	1.95259e-10	3.59227e-24
Anp32b	3.25556e-06	0.350403	0.978	0.86	0.0624222	1.97504e-24	0.521558	0.983	0.917	3.78694e-20	3.25556e-06	3.95008e-24
Meis2	1.26864e-07	0.279358	0.587	0.241	0.00243249	6.10897e-24	0.348351	0.529	0.16	1.17133e-19	1.26864e-07	1.22179e-23
Nme4	4.5479e-18	0.561942	0.891	0.381	8.72015e-14	6.83169e-24	0.525998	0.832	0.504	1.30991e-19	4.5479e-18	1.36634e-23
H2afz	6.19437e-07	0.541203	0.978	0.927	0.0118771	9.43072e-24	0.686736	0.983	0.932	1.80825e-19	6.19437e-07	1.88614e-23
Ttc36	3.84859e-13	-2.33039	0.348	0.782	7.37929e-09	1.0939e-23	-2.23796	0.597	0.791	2.09745e-19	3.84859e-13	2.1878e-23
Rcn1	3.69953e-18	1.24483	0.935	0.61	7.09348e-14	1.15867e-23	0.971127	0.84	0.537	2.22164e-19	3.69953e-18	2.31735e-23
Eif4a1	2.82032e-09	0.347962	1	0.913	5.40769e-05	1.24807e-23	0.378566	1	0.966	2.39306e-19	2.82032e-09	2.49615e-23
Wnt4	2.54848e-23	1.29467	0.696	0.134	4.88646e-19	3.37364e-19	0.693979	0.37	0.099	6.46861e-15	3.37364e-19	5.09696e-23
Marcksl1	1.68534e-12	0.64378	0.913	0.634	3.23148e-08	6.61717e-23	0.490842	0.975	0.692	1.26878e-18	1.68534e-12	1.32343e-22
Sox11	2.51704e-14	0.872514	0.891	0.416	4.82618e-10	1.05823e-22	0.832723	0.748	0.352	2.02906e-18	2.51704e-14	2.11647e-22
Tshz2	4.99604e-14	0.607394	0.848	0.422	9.57941e-10	1.08199e-22	0.464204	0.731	0.337	2.0746e-18	4.99604e-14	2.16398e-22
Cdk4	3.4587e-13	0.670616	0.957	0.805	6.63171e-09	1.85932e-22	0.46334	0.966	0.895	3.56505e-18	3.4587e-13	3.71863e-22
Vcan	6.2158e-18	0.781285	0.783	0.241	1.19182e-13	2.51523e-22	0.547584	0.58	0.202	4.8227e-18	6.2158e-18	5.03046e-22
Dbn1	1.18826e-07	0.355836	0.717	0.369	0.00227837	3.76724e-22	0.301016	0.723	0.305	7.22331e-18	1.18826e-07	7.53448e-22
Ncam1	1.11936e-14	0.766743	0.957	0.657	2.14626e-10	4.66947e-22	0.663076	0.874	0.601	8.95325e-18	1.11936e-14	9.33895e-22
Srsf3	3.48443e-07	0.345996	1	0.852	0.00668104	4.88e-22	0.449831	0.983	0.897	9.35691e-18	3.48443e-07	9.76e-22
Akap12	8.57879e-13	1.02619	0.674	0.241	1.6449e-08	5.68917e-22	1.13486	0.546	0.183	1.09084e-17	8.57879e-13	1.13783e-21
Mdh1	3.17456e-10	-0.881303	0.978	0.971	6.08689e-06	7.18389e-22	-0.98238	0.975	0.982	1.37744e-17	3.17456e-10	1.43678e-21
Serbp1	6.13573e-09	0.359767	1	0.91	0.000117646	8.3774e-22	0.348617	1	0.973	1.60628e-17	6.13573e-09	1.67548e-21
Fabp3	4.28377e-14	-1.71023	0.283	0.785	8.2137e-10	8.55469e-22	-1.35438	0.202	0.652	1.64028e-17	4.28377e-14	1.71094e-21
Prss23	1.54351e-19	0.926946	0.848	0.326	2.95953e-15	1.22587e-21	0.743503	0.63	0.277	2.35048e-17	1.54351e-19	2.45174e-21
Anpep	5.48128e-07	-0.652027	0.283	0.648	0.0105098	1.38967e-21	-0.977227	0.218	0.659	2.66456e-17	5.48128e-07	2.77935e-21
Mmp23	1.95298e-19	0.448246	0.609	0.11	3.74464e-15	1.41069e-21	0.257588	0.286	0.048	2.70486e-17	1.95298e-19	2.82138e-21
Rpl15	1.36702e-10	0.418345	1	0.968	2.62112e-06	1.67541e-21	0.306467	1	0.993	3.21243e-17	1.36702e-10	3.35082e-21
Cdh6	3.60547e-15	0.783924	0.957	0.584	6.91313e-11	1.70178e-21	0.590246	0.933	0.669	3.26298e-17	3.60547e-15	3.40355e-21
Aldh6a1	1.32347e-06	-0.614115	0.239	0.581	0.0253762	1.79518e-21	-0.687293	0.269	0.667	3.44208e-17	1.32347e-06	3.59036e-21
Serf1	1.60776e-12	0.540612	0.935	0.718	3.08273e-08	2.05601e-21	0.559216	0.966	0.798	3.94219e-17	1.60776e-12	4.11202e-21
Epha7	9.49356e-14	0.355493	0.761	0.25	1.82029e-09	2.26714e-21	0.413476	0.756	0.348	4.34702e-17	9.49356e-14	4.53429e-21
Pkm	1.17986e-07	0.422432	0.978	0.811	0.00226227	5.03024e-21	0.49603	1	0.877	9.64499e-17	1.17986e-07	1.00605e-20
Siva1	4.68203e-12	0.476859	0.957	0.677	8.97732e-08	5.63585e-21	0.452351	0.908	0.665	1.08062e-16	4.68203e-12	1.12717e-20
Psip1	7.44271e-11	0.465712	0.935	0.605	1.42707e-06	6.10736e-21	0.460226	0.899	0.606	1.17103e-16	7.44271e-11	1.22147e-20
Cbx1	3.47293e-05	0.297712	0.957	0.805	0.665899	1.08269e-20	0.427675	0.975	0.862	2.07595e-16	3.47293e-05	2.16538e-20
Nradd	2.19826e-09	0.296033	0.696	0.302	4.21494e-05	1.2239e-20	0.28312	0.613	0.239	2.3467e-16	2.19826e-09	2.44779e-20
Slc23a1	1.17859e-06	-0.51763	0.109	0.474	0.0225984	1.24595e-20	-0.792825	0.092	0.538	2.38899e-16	1.17859e-06	2.49191e-20
Hoxc9	1.62083e-16	0.424348	0.783	0.262	3.10779e-12	1.24743e-20	0.31022	0.597	0.222	2.39183e-16	1.62083e-16	2.49487e-20
Rpl3	6.43056e-13	0.532846	1	0.974	1.23299e-08	2.25568e-20	0.371822	1	0.996	4.32503e-16	6.43056e-13	4.51135e-20
Tpi1	5.26255e-07	-0.440231	1	0.922	0.0100904	2.30255e-20	-0.494261	0.992	0.993	4.41491e-16	5.26255e-07	4.6051e-20
Tuba4a	7.83862e-07	-0.738002	0.522	0.724	0.0150298	2.83413e-20	-0.610214	0.387	0.739	5.43416e-16	7.83862e-07	5.66825e-20
Ccnd2	1.60758e-07	0.446826	0.674	0.36	0.00308238	3.24583e-20	0.76825	0.58	0.234	6.22356e-16	1.60758e-07	6.49167e-20
Mep1a	3.52869e-09	-1.41663	0.13	0.573	6.76591e-05	3.59784e-20	-1.28648	0.151	0.578	6.8985e-16	3.52869e-09	7.19569e-20
Gipc2	2.30041e-06	-0.605618	0.326	0.619	0.0441081	3.66998e-20	-0.80032	0.37	0.684	7.03682e-16	2.30041e-06	7.33996e-20
Pgam1	2.12505e-05	-0.439562	0.957	0.951	0.407456	5.39437e-20	-0.544305	0.983	0.987	1.03432e-15	2.12505e-05	1.07887e-19
Cct2	4.1797e-06	0.285154	0.978	0.849	0.0801415	6.8215e-20	0.338358	1	0.939	1.30795e-15	4.1797e-06	1.3643e-19
Adamts5	3.37129e-10	0.496327	0.348	0.064	6.46411e-06	8.64603e-20	0.335362	0.277	0.049	1.65779e-15	3.37129e-10	1.72921e-19
Nedd4	8.71116e-10	0.454715	1	0.872	1.67028e-05	9.42609e-20	0.387231	1	0.951	1.80736e-15	8.71116e-10	1.88522e-19
Tmem176a	0.000166752	-0.649871	0.848	0.805	1	1.0088e-19	-0.827778	0.933	0.953	1.93428e-15	0.000166752	2.01761e-19
Snrpf	4.223e-08	0.466839	0.957	0.767	0.000809719	1.11752e-19	0.504972	0.95	0.827	2.14273e-15	4.223e-08	2.23503e-19
Ntm	6.44765e-06	0.43314	0.543	0.273	0.123627	1.13472e-19	0.488683	0.681	0.307	2.1757e-15	6.44765e-06	2.26943e-19
Sparc	1.0733e-13	1.2365	0.957	0.64	2.05794e-09	1.35817e-19	1.17317	0.824	0.581	2.60415e-15	1.0733e-13	2.71633e-19
Ptprs	3.67915e-12	0.46885	0.783	0.366	7.0544e-08	1.55326e-19	0.338994	0.731	0.369	2.97822e-15	3.67915e-12	3.10652e-19
Rpl12	3.31178e-08	0.389535	1	0.959	0.000635001	1.84579e-19	0.356735	1	0.996	3.53912e-15	3.31178e-08	3.69158e-19
Plat	3.56837e-18	0.721962	0.609	0.122	6.84199e-14	2.2425e-19	0.38598	0.336	0.078	4.29976e-15	3.56837e-18	4.48499e-19
Hao2	5.4808e-08	-0.914273	0.196	0.576	0.00105089	2.37135e-19	-1.15405	0.311	0.649	4.54682e-15	5.4808e-08	4.7427e-19
Hoxc10	6.01082e-13	0.481392	0.717	0.279	1.15251e-08	2.75257e-19	0.395566	0.689	0.334	5.27779e-15	6.01082e-13	5.50515e-19
Hibadh	2.35158e-07	-0.485761	0.674	0.826	0.00450892	3.09734e-19	-0.529287	0.79	0.898	5.93885e-15	2.35158e-07	6.19469e-19
Ptn	9.60452e-12	0.720233	0.87	0.445	1.84157e-07	5.94301e-19	0.968731	0.597	0.28	1.13951e-14	9.60452e-12	1.1886e-18
Hnrnpa0	3.10513e-08	0.453062	0.957	0.84	0.000595377	5.97453e-19	0.37416	0.992	0.915	1.14556e-14	3.10513e-08	1.19491e-18
Timp2	6.41432e-19	0.566898	0.913	0.384	1.22988e-14	1.27025e-13	0.293914	0.63	0.321	2.43557e-09	1.27025e-13	1.28286e-18
Auts2	2.8623e-12	0.580603	0.87	0.529	5.48818e-08	8.72889e-19	0.496619	0.849	0.597	1.67368e-14	2.8623e-12	1.74578e-18
Asap1	2.58634e-10	0.4685	0.891	0.541	4.95904e-06	8.82852e-19	0.547761	0.723	0.413	1.69278e-14	2.58634e-10	1.7657e-18
Ranbp1	1.45565e-08	0.461676	0.957	0.788	0.000279107	8.86773e-19	0.449622	0.958	0.831	1.7003e-14	1.45565e-08	1.77355e-18
Fbp1	1.02102e-08	-1.47884	0.043	0.497	0.00019577	1.09641e-18	-1.77277	0.092	0.519	2.10225e-14	1.02102e-08	2.19282e-18
Cyb5a	5.43806e-06	-0.641807	0.957	0.846	0.104269	1.26537e-18	-0.731582	0.924	0.939	2.42622e-14	5.43806e-06	2.53074e-18
Nono	1.06292e-09	0.370084	0.957	0.753	2.03804e-05	1.35648e-18	0.402839	0.992	0.855	2.60092e-14	1.06292e-09	2.71297e-18
Snrpb	5.7631e-07	0.273168	0.957	0.846	0.0110502	1.42821e-18	0.323518	0.966	0.901	2.73846e-14	5.7631e-07	2.85643e-18
Ube2e3	1.84369e-07	0.381173	0.891	0.695	0.0035351	1.46404e-18	0.363033	0.958	0.749	2.80716e-14	1.84369e-07	2.92809e-18
Igfbp6	1.54597e-18	0.711709	0.587	0.099	2.96424e-14	1.34913e-17	0.364464	0.286	0.062	2.58682e-13	1.34913e-17	3.09194e-18
Ran	1.04378e-06	0.390912	1	0.884	0.0200135	1.66218e-18	0.484289	1	0.933	3.18706e-14	1.04378e-06	3.32436e-18
Gclm	8.53398e-07	-0.891983	0.674	0.782	0.0163631	2.122e-18	-0.949534	0.714	0.862	4.06872e-14	8.53398e-07	4.244e-18
Cct4	1.57499e-09	0.415026	1	0.799	3.01988e-05	2.33244e-18	0.346118	0.983	0.909	4.47222e-14	1.57499e-09	4.66488e-18
Gk	0.00369741	-0.464757	0.435	0.549	1	2.85097e-18	-0.664495	0.361	0.703	5.46645e-14	0.00369741	5.70194e-18
Cisd1	5.84792e-07	-0.561717	0.826	0.875	0.0112128	2.93495e-18	-0.597397	0.866	0.933	5.62747e-14	5.84792e-07	5.8699e-18
Napsa	1.19501e-06	-1.12204	0.261	0.613	0.022913	3.97386e-18	-2.25655	0.227	0.602	7.61948e-14	1.19501e-06	7.94772e-18
Acaa1b	1.21911e-06	-0.657175	0.261	0.584	0.0233751	5.09e-18	-0.63183	0.168	0.567	9.75957e-14	1.21911e-06	1.018e-17
Tmem176b	9.6769e-06	-0.711818	0.935	0.901	0.185545	5.18768e-18	-0.82273	0.95	0.978	9.94686e-14	9.6769e-06	1.03754e-17
Cth	3.00313e-06	-0.66498	0.37	0.628	0.057582	7.19305e-18	-0.788195	0.286	0.631	1.37919e-13	3.00313e-06	1.43861e-17
Rps23	6.11548e-08	0.31863	1	0.971	0.00117258	7.24844e-18	0.319351	1	0.991	1.38982e-13	6.11548e-08	1.44969e-17
Chchd10	2.6501e-09	-0.884537	0.935	0.927	5.08131e-05	8.4933e-18	-0.943839	0.899	0.94	1.6285e-13	2.6501e-09	1.69866e-17
Ndufv3	1.13312e-06	-0.537472	0.87	0.849	0.0217264	1.03004e-17	-0.518324	0.849	0.931	1.975e-13	1.13312e-06	2.06008e-17
Snrpe	1.81537e-08	0.373561	0.978	0.805	0.000348078	1.03115e-17	0.326247	0.992	0.922	1.97714e-13	1.81537e-08	2.06231e-17
Hes5	8.7166e-09	0.572205	0.261	0.041	0.000167132	1.13585e-17	0.427211	0.151	0.014	2.17788e-13	8.7166e-09	2.2717e-17
Smarcc1	7.96474e-11	0.430695	0.935	0.602	1.52716e-06	1.49454e-17	0.443229	0.899	0.647	2.86563e-13	7.96474e-11	2.98908e-17
Krt8	1.02964e-07	-0.400807	0.435	0.767	0.00197424	1.50665e-17	-0.603383	0.37	0.734	2.88886e-13	1.02964e-07	3.01331e-17
Hmgn1	1.92113e-11	0.499588	1	0.916	3.68357e-07	1.56862e-17	0.357629	0.983	0.954	3.00768e-13	1.92113e-11	3.13725e-17
Pfn1	2.49942e-05	0.253354	0.978	0.869	0.479238	1.76484e-17	0.386891	0.992	0.936	3.3839e-13	2.49942e-05	3.52968e-17
Aco2	5.19006e-05	-0.527954	0.957	0.872	0.995142	1.88856e-17	-0.651072	0.899	0.94	3.62113e-13	5.19006e-05	3.77713e-17
Slc6a18	4.00245e-07	-0.679188	0.043	0.43	0.00767431	2.19756e-17	-0.914578	0.126	0.516	4.21361e-13	4.00245e-07	4.39513e-17
Prdx5	1.01137e-06	-0.978627	0.804	0.901	0.0193921	2.73988e-17	-0.788621	0.891	0.946	5.25345e-13	1.01137e-06	5.47976e-17
Atp6v0a4	6.25084e-08	-0.554328	0.065	0.509	0.00119854	3.05186e-17	-0.454623	0.042	0.459	5.85163e-13	6.25084e-08	6.10372e-17
Slc39a5	1.57355e-05	-0.724585	0.304	0.555	0.301713	3.08656e-17	-0.780191	0.218	0.595	5.91817e-13	1.57355e-05	6.17312e-17
Paqr5	8.02092e-11	-0.776407	0.217	0.686	1.53793e-06	3.20417e-17	-0.552228	0.487	0.774	6.14368e-13	8.02092e-11	6.40835e-17
Snrpg	2.55181e-08	0.415735	0.913	0.753	0.000489284	3.56949e-17	0.395922	0.95	0.822	6.84413e-13	2.55181e-08	7.13897e-17
Tcn2	4.83325e-09	-1.17459	0.5	0.75	9.26728e-05	3.68776e-17	-0.887198	0.546	0.764	7.07092e-13	4.83325e-09	7.37553e-17
Fubp1	1.02443e-11	0.486164	0.978	0.727	1.96425e-07	4.58958e-17	0.434384	0.916	0.744	8.80005e-13	1.02443e-11	9.17915e-17
Rida	0.000137751	-0.976017	0.783	0.797	1	5.00614e-17	-1.01036	0.924	0.924	9.59878e-13	0.000137751	1.00123e-16
Hmgb3	2.17176e-10	0.607945	0.935	0.709	4.16412e-06	5.1883e-17	0.540154	0.857	0.653	9.94804e-13	2.17176e-10	1.03766e-16
Ywhaq	8.76831e-12	0.538499	1	0.828	1.68123e-07	6.14142e-17	0.330947	0.992	0.914	1.17755e-12	8.76831e-12	1.22828e-16
Selenoh	2.64848e-05	0.371573	0.848	0.715	0.507819	6.35714e-17	0.444656	0.95	0.764	1.21892e-12	2.64848e-05	1.27143e-16
Hpn	6.81794e-09	-0.698478	0.304	0.677	0.000130727	6.47612e-17	-0.525342	0.168	0.564	1.24173e-12	6.81794e-09	1.29522e-16
Fth1	9.88731e-06	-0.49099	1	0.974	0.189579	6.95449e-17	-0.723491	0.983	0.996	1.33345e-12	9.88731e-06	1.3909e-16
Rps11	4.37333e-11	0.441297	1	0.965	8.38543e-07	7.82771e-17	0.295434	1	0.989	1.50088e-12	4.37333e-11	1.56554e-16
Tgfbi	2.16229e-09	0.560465	0.457	0.14	4.14597e-05	8.67842e-17	0.424789	0.336	0.092	1.664e-12	2.16229e-09	1.73568e-16
Ostf1	0.000730335	-0.288991	0.674	0.753	1	8.71523e-17	-0.489013	0.597	0.818	1.67106e-12	0.000730335	1.74305e-16
Cyp4a31	2.48677e-06	-0.403033	0.065	0.413	0.0476813	9.28343e-17	-0.693214	0.143	0.518	1.78e-12	2.48677e-06	1.85669e-16
Rpsa	1.02976e-09	0.418906	1	0.98	1.97445e-05	1.02044e-16	0.333939	1	0.989	1.95659e-12	1.02976e-09	2.04088e-16
Amn	4.28154e-10	-1.17973	0.13	0.616	8.20943e-06	1.09477e-16	-1.00662	0.311	0.61	2.09912e-12	4.28154e-10	2.18955e-16
Btf3	7.267e-10	0.363513	1	0.919	1.39337e-05	1.09718e-16	0.270236	0.992	0.979	2.10374e-12	7.267e-10	2.19436e-16
Vim	2.19354e-06	0.812459	0.848	0.593	0.042059	1.1272e-16	1.23537	0.773	0.505	2.1613e-12	2.19354e-06	2.2544e-16
Rpl18	2.05542e-09	0.379535	1	0.968	3.94106e-05	1.35364e-16	0.284397	1	0.984	2.59547e-12	2.05542e-09	2.70728e-16
Rpl37	1.08243e-07	0.350974	1	0.977	0.00207545	1.42702e-16	0.295393	1	0.994	2.73617e-12	1.08243e-07	2.85404e-16
Wt1	1.53655e-16	0.759635	0.674	0.186	2.94618e-12	1.46294e-12	0.333478	0.378	0.142	2.80504e-08	1.46294e-12	3.0731e-16
Ddah2	1.65008e-16	0.650241	0.957	0.645	3.16385e-12	2.20546e-11	0.321049	0.908	0.759	4.22876e-07	2.20546e-11	3.30015e-16
Ly6a	2.2635e-16	-1.94798	0.457	0.849	4.34003e-12	1.69942e-16	-1.43848	0.303	0.644	3.25847e-12	2.2635e-16	3.39884e-16
Ktn1	5.83292e-07	0.274703	0.913	0.721	0.011184	1.70543e-16	0.418771	0.916	0.748	3.26999e-12	5.83292e-07	3.41086e-16
Rps15a	9.28567e-08	0.369562	1	0.974	0.00178043	1.80092e-16	0.319792	1	0.987	3.45308e-12	9.28567e-08	3.60183e-16
Pdcd4	3.59288e-09	0.265221	0.913	0.485	6.88899e-05	1.88762e-16	0.4093	0.891	0.599	3.61932e-12	3.59288e-09	3.77524e-16
Ndufb10	2.47238e-09	-0.710606	0.935	0.942	4.74054e-05	1.93271e-16	-0.55437	0.916	0.961	3.70578e-12	2.47238e-09	3.86542e-16
Nkd1	6.18404e-09	0.417699	0.609	0.241	0.000118573	2.11592e-16	0.34854	0.487	0.189	4.05706e-12	6.18404e-09	4.23184e-16
Prdx6	2.12134e-07	0.429492	0.957	0.756	0.00406746	2.2767e-16	0.410744	0.975	0.842	4.36535e-12	2.12134e-07	4.5534e-16
Pdzk1	0.000178753	-1.16731	0.587	0.616	1	2.71508e-16	-1.38337	0.353	0.634	5.2059e-12	0.000178753	5.43017e-16
Cald1	2.8067e-16	0.954914	0.826	0.328	5.38157e-12	2.74782e-12	0.432786	0.513	0.237	5.26867e-08	2.74782e-12	5.6134e-16
Sod2	6.9181e-12	-0.846139	0.826	0.904	1.32648e-07	3.94007e-16	-0.519971	0.891	0.943	7.5547e-12	6.9181e-12	7.88015e-16
Nop56	2.5e-08	0.420129	0.935	0.686	0.00047935	4.34918e-16	0.417146	0.891	0.664	8.33912e-12	2.5e-08	8.69836e-16
Srrm2	1.05732e-06	0.293474	1	0.863	0.020273	5.18388e-16	0.310912	0.992	0.92	9.93957e-12	1.05732e-06	1.03678e-15
Fbl	6.79732e-07	0.330304	0.935	0.77	0.0130332	5.72509e-16	0.370254	0.933	0.789	1.09773e-11	6.79732e-07	1.14502e-15
Rps9	1.01741e-11	0.482665	1	0.956	1.95078e-07	5.75251e-16	0.297472	0.992	0.989	1.10299e-11	1.01741e-11	1.1505e-15
Erh	1.43833e-08	0.41793	0.935	0.73	0.000275785	5.87191e-16	0.360734	0.924	0.726	1.12588e-11	1.43833e-08	1.17438e-15
Rbm3	9.83803e-11	0.492938	1	0.837	1.88634e-06	6.58167e-16	0.398658	0.992	0.889	1.26197e-11	9.83803e-11	1.31633e-15
Bzw2	3.29396e-06	0.414187	0.913	0.669	0.0631583	8.38969e-16	0.373527	0.933	0.731	1.60864e-11	3.29396e-06	1.67794e-15
4931406C07Rik	6.95629e-07	-1.17981	0.413	0.672	0.013338	8.51473e-16	-1.04031	0.479	0.729	1.63261e-11	6.95629e-07	1.70295e-15
Atrx	2.69933e-08	0.47054	0.957	0.721	0.000517569	1.10339e-15	0.37983	0.95	0.805	2.11565e-11	2.69933e-08	2.20679e-15
Entpd5	1.38961e-06	-0.484189	0.217	0.555	0.0266444	1.21058e-15	-0.580926	0.403	0.692	2.32117e-11	1.38961e-06	2.42117e-15
Tmem174	6.30615e-09	-1.17229	0.087	0.532	0.000120914	1.42357e-15	-0.991055	0.126	0.487	2.72956e-11	6.30615e-09	2.84715e-15
Cfl1	2.43689e-09	0.369372	1	0.924	4.67249e-05	1.51554e-15	0.334068	0.992	0.975	2.90589e-11	2.43689e-09	3.03107e-15
Sfpq	1.62036e-08	0.428842	0.978	0.794	0.000310688	1.51685e-15	0.409513	0.933	0.794	2.90841e-11	1.62036e-08	3.0337e-15
Rasl11b	8.93161e-14	0.847228	0.652	0.218	1.71255e-09	1.74295e-15	0.461653	0.429	0.154	3.34193e-11	8.93161e-14	3.48589e-15
Abhd17c	4.82012e-05	-0.365997	0.457	0.666	0.924211	1.78281e-15	-0.459096	0.513	0.723	3.41836e-11	4.82012e-05	3.56562e-15
Gm10639	4.25584e-09	-1.11985	0.065	0.529	8.16015e-05	1.79687e-15	-0.905213	0.034	0.411	3.44532e-11	4.25584e-09	3.59374e-15
Fjx1	1.1451e-05	0.251246	0.565	0.279	0.219561	1.8045e-15	0.373499	0.546	0.227	3.45995e-11	1.1451e-05	3.609e-15
Rps3a1	1.02081e-09	0.394073	1	0.98	1.95731e-05	2.17687e-15	0.303275	1	0.992	4.17392e-11	1.02081e-09	4.35373e-15
Hnrnpab	2.51543e-09	0.403286	0.935	0.837	4.82309e-05	2.22972e-15	0.334683	0.975	0.881	4.27527e-11	2.51543e-09	4.45945e-15
Eef1g	4.92304e-08	0.400024	1	0.916	0.000943943	2.27993e-15	0.295896	1	0.971	4.37154e-11	4.92304e-08	4.55986e-15
2610528J11Rik	1.42382e-06	-0.502864	0.261	0.581	0.0273003	2.33014e-15	-0.418024	0.126	0.504	4.46782e-11	1.42382e-06	4.66029e-15
Emx2	7.07553e-13	0.666689	0.913	0.558	1.35666e-08	2.4008e-15	0.493632	0.773	0.501	4.6033e-11	7.07553e-13	4.80161e-15
Prss8	7.61434e-09	-0.639777	0.261	0.683	0.000145997	2.493e-15	-0.468397	0.445	0.722	4.78008e-11	7.61434e-09	4.98601e-15
Rpl9	1.00063e-10	0.469963	1	0.971	1.91861e-06	2.91044e-15	0.282816	1	0.985	5.58047e-11	1.00063e-10	5.82087e-15
Ptpn13	2.7264e-06	0.425835	0.891	0.672	0.0522761	3.78702e-15	0.437083	0.958	0.767	7.26124e-11	2.7264e-06	7.57405e-15
Hist3h2ba	3.79009e-15	0.516359	0.87	0.384	7.26712e-11	4.84762e-14	0.254486	0.319	0.092	9.29482e-10	4.84762e-14	7.58019e-15
Uqcrb	2.38404e-07	-0.569112	0.935	0.942	0.00457115	3.95912e-15	-0.50228	0.983	0.977	7.59121e-11	2.38404e-07	7.91823e-15
Slc27a2	4.56333e-06	-0.683827	0.13	0.451	0.0874974	4.25561e-15	-1.04316	0.101	0.456	8.15971e-11	4.56333e-06	8.51122e-15
Ybx3	5.84888e-11	0.485117	0.957	0.735	1.12146e-06	4.33343e-15	0.385751	0.958	0.784	8.30892e-11	5.84888e-11	8.66686e-15
Zbtb12	3.78972e-09	0.308619	0.848	0.445	7.2664e-05	4.66927e-15	0.261852	0.739	0.414	8.95287e-11	3.78972e-09	9.33855e-15
Rplp2	4.0058e-08	0.321724	1	0.971	0.000768072	5.0364e-15	0.284469	1	0.988	9.65679e-11	4.0058e-08	1.00728e-14
Cnn3	1.21327e-09	0.402813	0.87	0.576	2.32633e-05	5.13696e-15	0.348414	0.773	0.482	9.84961e-11	1.21327e-09	1.02739e-14
Cks1b	4.26772e-07	0.281069	0.848	0.503	0.00818292	5.33322e-15	0.364867	0.84	0.511	1.02259e-10	4.26772e-07	1.06664e-14
Hnrnpm	6.03307e-08	0.405013	0.913	0.799	0.00115678	5.66013e-15	0.342686	0.95	0.846	1.08527e-10	6.03307e-08	1.13203e-14
Slc12a2	8.0312e-10	0.382049	0.609	0.244	1.5399e-05	6.66595e-15	0.37088	0.462	0.182	1.27813e-10	8.0312e-10	1.33319e-14
Chpt1	2.01574e-05	-0.610048	0.63	0.782	0.386498	6.72668e-15	-0.956442	0.613	0.792	1.28977e-10	2.01574e-05	1.34534e-14
Rpl13	9.54031e-08	0.33269	1	0.994	0.00182926	6.82694e-15	0.271331	1	0.999	1.309e-10	9.54031e-08	1.36539e-14
Srsf7	2.07603e-10	0.479748	1	0.721	3.98058e-06	6.85843e-15	0.405091	0.899	0.716	1.31504e-10	2.07603e-10	1.37169e-14
Rps5	3.20439e-10	0.450011	1	0.983	6.14409e-06	7.24652e-15	0.311406	1	0.991	1.38945e-10	3.20439e-10	1.4493e-14
Limd2	4.44695e-07	0.277176	0.696	0.355	0.00852659	8.34516e-15	0.310277	0.63	0.303	1.6001e-10	4.44695e-07	1.66903e-14
Pth1r	1.26017e-08	-1.04182	0.63	0.802	0.000241624	9.03254e-15	-0.826566	0.714	0.812	1.7319e-10	1.26017e-08	1.80651e-14
Cct8	1.64643e-06	0.352558	0.978	0.843	0.0315686	1.01787e-14	0.33756	0.983	0.922	1.95166e-10	1.64643e-06	2.03573e-14
Nes	9.21407e-12	0.561385	0.609	0.198	1.76671e-07	1.03896e-14	0.291446	0.395	0.128	1.99211e-10	9.21407e-12	2.07793e-14
Sumo2	1.60733e-08	0.434513	0.957	0.86	0.000308189	1.12841e-14	0.278255	0.992	0.93	2.16362e-10	1.60733e-08	2.25683e-14
Neu1	3.09165e-06	-0.506175	0.391	0.628	0.0592793	1.18427e-14	-0.610431	0.597	0.773	2.27071e-10	3.09165e-06	2.36853e-14
Itm2b	6.53761e-05	-0.538895	0.957	0.936	1	1.24268e-14	-0.480386	0.983	0.988	2.38271e-10	6.53761e-05	2.48535e-14
Lrpap1	2.97827e-05	-0.848833	0.848	0.823	0.571053	1.25913e-14	-0.757562	0.756	0.887	2.41426e-10	2.97827e-05	2.51827e-14
Ppid	8.42301e-08	0.302797	0.891	0.549	0.00161503	1.29537e-14	0.279131	0.882	0.613	2.48374e-10	8.42301e-08	2.59074e-14
Cox4i1	6.43658e-06	-0.353441	1	0.985	0.123415	1.30548e-14	-0.347892	0.992	0.998	2.50313e-10	6.43658e-06	2.61096e-14
Ddx39b	1.21314e-09	0.462759	0.957	0.785	2.32607e-05	1.34092e-14	0.355979	0.958	0.838	2.57109e-10	1.21314e-09	2.68185e-14
Atp6v1e1	6.40027e-07	-0.671572	0.848	0.866	0.0122719	1.36018e-14	-0.543015	0.882	0.914	2.60801e-10	6.40027e-07	2.72036e-14
Ssrp1	1.55468e-05	0.266534	0.935	0.706	0.298095	1.49115e-14	0.342262	0.958	0.742	2.85912e-10	1.55468e-05	2.98229e-14
Mex3a	5.32335e-06	0.260589	0.674	0.369	0.10207	1.58148e-14	0.303347	0.639	0.318	3.03234e-10	5.32335e-06	3.16297e-14
Fus	6.81737e-07	0.412544	0.957	0.788	0.0130716	1.79905e-14	0.354098	0.966	0.863	3.44951e-10	6.81737e-07	3.59811e-14
S100a10	0.00064198	0.346301	0.935	0.715	1	1.90424e-14	0.505617	0.966	0.739	3.65119e-10	0.00064198	3.80848e-14
Aadat	1.63006e-06	-1.3467	0.13	0.465	0.0312548	1.94922e-14	-1.65879	0.185	0.519	3.73743e-10	1.63006e-06	3.89844e-14
Lmnb1	1.5718e-08	0.456225	0.826	0.459	0.000301377	1.99162e-14	0.328913	0.756	0.442	3.81874e-10	1.5718e-08	3.98325e-14
H2afy2	4.49559e-13	0.510533	0.913	0.535	8.61985e-09	2.01566e-14	0.271836	0.773	0.464	3.86483e-10	4.49559e-13	4.03133e-14
Sostdc1	1.10931e-12	-1.79084	0.283	0.741	2.12699e-08	2.17921e-14	-1.09361	0.454	0.763	4.17842e-10	1.10931e-12	4.35843e-14
Pbx1	8.8109e-09	0.469014	0.848	0.567	0.00016894	2.35883e-14	0.316168	0.866	0.578	4.52282e-10	8.8109e-09	4.71766e-14
Cyc1	1.22405e-09	-0.682596	0.935	0.933	2.347e-05	2.39894e-14	-0.639007	0.891	0.942	4.59972e-10	1.22405e-09	4.79787e-14
Slc5a8	8.05654e-05	-0.493073	0.022	0.294	1	2.59479e-14	-0.739707	0.025	0.377	4.97526e-10	8.05654e-05	5.18959e-14
Prnp	1.35111e-08	0.673459	0.587	0.227	0.000259062	2.87737e-14	0.525932	0.504	0.215	5.51708e-10	1.35111e-08	5.75475e-14
Mcm7	3.40757e-09	0.403104	0.804	0.422	6.53368e-05	2.9217e-14	0.324933	0.723	0.42	5.60207e-10	3.40757e-09	5.84341e-14
Nat8f1	3.34402e-06	-1.66596	0.283	0.552	0.0641183	2.93796e-14	-1.45224	0.286	0.589	5.63325e-10	3.34402e-06	5.87593e-14
Pck1	7.08299e-06	-0.464102	0	0.326	0.135809	3.15254e-14	-0.893526	0.017	0.369	6.04468e-10	7.08299e-06	6.30508e-14
0610005C13Rik	3.1373e-06	-0.754321	0.326	0.581	0.0601545	3.38143e-14	-0.580549	0.235	0.558	6.48356e-10	3.1373e-06	6.76287e-14
Hist1h2bc	0.0222288	-0.432935	0.587	0.654	1	3.38372e-14	-0.62914	0.622	0.827	6.48794e-10	0.0222288	6.76743e-14
Prr15l	4.28317e-06	-0.425832	0.348	0.616	0.0821255	3.55735e-14	-0.436011	0.403	0.668	6.82087e-10	4.28317e-06	7.1147e-14
Rps13	9.99501e-07	0.279027	1	0.974	0.0191644	3.71968e-14	0.259721	1	0.991	7.13211e-10	9.99501e-07	7.43936e-14
H2afv	2.71567e-11	0.632633	0.957	0.733	5.20702e-07	3.81388e-14	0.489639	0.966	0.821	7.31273e-10	2.71567e-11	7.62776e-14
Atpif1	0.000110293	-0.324046	1	0.968	1	4.20271e-14	-0.423772	1	0.994	8.05828e-10	0.000110293	8.40542e-14
Cubn	4.00681e-07	-0.699949	0.087	0.468	0.00768267	4.73942e-14	-0.57075	0.134	0.471	9.08736e-10	4.00681e-07	9.47883e-14
Glud1	5.55144e-05	-0.548879	0.935	0.907	1	4.80205e-14	-0.490043	0.975	0.973	9.20745e-10	5.55144e-05	9.6041e-14
Rbbp4	8.03679e-07	0.269877	0.935	0.683	0.0154097	4.83807e-14	0.331733	0.908	0.736	9.27651e-10	8.03679e-07	9.67613e-14
Ezh2	4.91616e-08	0.367637	0.804	0.465	0.000942625	4.85091e-14	0.372133	0.748	0.483	9.30114e-10	4.91616e-08	9.70183e-14
Ilf2	7.73213e-09	0.36885	0.891	0.654	0.000148256	5.08142e-14	0.285272	0.874	0.645	9.74311e-10	7.73213e-09	1.01628e-13
Slc25a10	5.30011e-06	-0.519688	0.283	0.564	0.101624	5.26463e-14	-0.463926	0.134	0.476	1.00944e-09	5.30011e-06	1.05293e-13
Rpl7	7.79739e-11	0.420571	1	0.971	1.49507e-06	5.27779e-14	0.264874	1	0.993	1.01196e-09	7.79739e-11	1.05556e-13
Calml4	0.000292572	-1.18064	0.696	0.68	1	5.34114e-14	-1.05953	0.655	0.764	1.02411e-09	0.000292572	1.06823e-13
Ttc3	6.18515e-08	0.329822	0.957	0.779	0.00118594	5.85725e-14	0.389502	0.95	0.841	1.12307e-09	6.18515e-08	1.17145e-13
Tmprss2	3.20412e-07	-0.409551	0.065	0.453	0.00614357	5.92333e-14	-0.351458	0.151	0.508	1.13574e-09	3.20412e-07	1.18467e-13
Hmgcs1	1.71456e-05	-0.722548	0.761	0.849	0.32875	6.68013e-14	-0.696228	0.748	0.846	1.28085e-09	1.71456e-05	1.33603e-13
Rcc2	2.63392e-10	0.523808	0.826	0.515	5.05028e-06	6.7356e-14	0.35934	0.748	0.489	1.29148e-09	2.63392e-10	1.34712e-13
Trim28	7.24962e-07	0.299205	0.935	0.73	0.0139004	6.93856e-14	0.337654	0.899	0.724	1.3304e-09	7.24962e-07	1.38771e-13
Rpl11	2.92843e-10	0.405455	1	0.971	5.61497e-06	7.14102e-14	0.271806	1	0.991	1.36922e-09	2.92843e-10	1.4282e-13
Cdc37	4.25204e-07	0.33388	0.957	0.767	0.00815286	7.22219e-14	0.269003	0.992	0.894	1.38478e-09	4.25204e-07	1.44444e-13
Galnt11	1.86657e-06	-0.835822	0.5	0.701	0.0357897	9.16687e-14	-0.847503	0.471	0.69	1.75766e-09	1.86657e-06	1.83337e-13
Zcchc11	2.2207e-10	0.319417	0.913	0.596	4.25797e-06	9.5059e-14	0.382787	0.899	0.685	1.82266e-09	2.2207e-10	1.90118e-13
Ube2i	5.90804e-10	0.394789	0.978	0.805	1.13281e-05	9.72945e-14	0.313808	0.958	0.876	1.86552e-09	5.90804e-10	1.94589e-13
Ruvbl1	3.58814e-09	0.388166	0.913	0.599	6.8799e-05	1.0188e-13	0.344761	0.832	0.607	1.95345e-09	3.58814e-09	2.0376e-13
Prdx2	2.64468e-08	0.343367	1	0.936	0.000507092	1.02453e-13	0.285927	0.992	0.971	1.96444e-09	2.64468e-08	2.04906e-13
Cthrc1	1.05759e-13	0.629525	0.783	0.308	2.02783e-09	1.09277e-09	0.533869	0.647	0.398	2.09528e-05	1.09277e-09	2.11519e-13
Rbm47	1.01675e-05	-0.487367	0.543	0.709	0.194952	1.16504e-13	-0.432279	0.697	0.817	2.23385e-09	1.01675e-05	2.33008e-13
Eif3f	3.32481e-05	0.312946	0.957	0.843	0.637499	1.1713e-13	0.274915	0.983	0.932	2.24586e-09	3.32481e-05	2.34261e-13
Calm2	9.67519e-08	0.376446	0.978	0.84	0.00185512	1.1843e-13	0.346947	0.966	0.909	2.27078e-09	9.67519e-08	2.3686e-13
Rpl34	7.45295e-09	0.396517	1	0.956	0.000142903	1.23514e-13	0.262401	1	0.986	2.36825e-09	7.45295e-09	2.47027e-13
Cct5	2.06856e-06	0.273839	0.978	0.855	0.0396626	1.24273e-13	0.313335	0.992	0.926	2.38282e-09	2.06856e-06	2.48547e-13
Aspa	2.12153e-05	-0.502091	0.174	0.474	0.406783	1.35339e-13	-0.793285	0.252	0.558	2.59499e-09	2.12153e-05	2.70678e-13
Vcam1	1.10871e-05	0.258255	0.565	0.262	0.212583	1.36454e-13	0.598447	0.647	0.326	2.61637e-09	1.10871e-05	2.72908e-13
Serpinf2	3.41522e-07	-0.745904	0.087	0.48	0.00654835	1.43826e-13	-0.639462	0.143	0.467	2.75773e-09	3.41522e-07	2.87653e-13
Fmo1	1.71249e-05	-0.743638	0.196	0.462	0.328354	1.49076e-13	-0.663	0.067	0.412	2.85839e-09	1.71249e-05	2.98153e-13
Grhpr	1.85956e-06	-0.758812	0.739	0.805	0.0356551	1.61763e-13	-0.56673	0.84	0.881	3.10165e-09	1.85956e-06	3.23527e-13
Mcur1	0.00131064	-0.395929	0.478	0.616	1	1.67075e-13	-0.450947	0.286	0.6	3.2035e-09	0.00131064	3.3415e-13
Etnk1	0.0693266	-0.306438	0.717	0.695	1	1.69826e-13	-0.626912	0.689	0.824	3.25624e-09	0.0693266	3.39652e-13
Nasp	1.28718e-05	0.312176	0.935	0.689	0.246805	1.86029e-13	0.440952	0.84	0.66	3.56693e-09	1.28718e-05	3.72059e-13
Lamp1	0.0103463	-0.351817	0.957	0.869	1	1.93441e-13	-0.454661	0.933	0.951	3.70904e-09	0.0103463	3.86882e-13
Rpl27a	1.58479e-08	0.378555	1	0.977	0.000303868	2.32927e-13	0.270421	1	0.993	4.46614e-09	1.58479e-08	4.65854e-13
Atp5a1	5.07869e-07	-0.44777	0.978	0.991	0.00973788	2.37339e-13	-0.454825	1	0.997	4.55074e-09	5.07869e-07	4.74678e-13
Gm1673	1.14708e-08	0.347037	0.891	0.564	0.000219941	2.51618e-13	0.32134	0.824	0.54	4.82453e-09	1.14708e-08	5.03236e-13
Rpl18a	6.97903e-09	0.412313	1	0.968	0.000133816	2.69961e-13	0.281524	1	0.996	5.17623e-09	6.97903e-09	5.39921e-13
Pdzk1ip1	1.43071e-06	-1.02406	0.457	0.741	0.0274325	2.81926e-13	-0.896976	0.412	0.701	5.40565e-09	1.43071e-06	5.63852e-13
Top2b	4.78508e-08	0.318004	0.848	0.602	0.000917492	2.98044e-13	0.291097	0.84	0.619	5.7147e-09	4.78508e-08	5.96089e-13
Hoga1	0.00407971	-0.363839	0.435	0.57	1	3.02495e-13	-0.606135	0.445	0.665	5.80004e-09	0.00407971	6.0499e-13
Rpl32	6.70157e-10	0.429869	1	0.977	1.28496e-05	3.34636e-13	0.281767	1	0.994	6.41631e-09	6.70157e-10	6.69272e-13
Dbi	1.88714e-08	-0.993812	0.978	0.916	0.00036184	3.41035e-13	-0.777545	0.975	0.967	6.53901e-09	1.88714e-08	6.82071e-13
Grb10	5.69113e-07	0.355957	0.848	0.663	0.0109122	3.53057e-13	0.332828	0.815	0.597	6.76951e-09	5.69113e-07	7.06114e-13
Smarce1	4.01487e-11	0.452532	0.935	0.674	7.69812e-07	3.70489e-13	0.374275	0.891	0.737	7.10376e-09	4.01487e-11	7.40978e-13
Bnip2	4.45606e-08	0.307854	0.761	0.439	0.000854405	4.20288e-13	0.265878	0.655	0.362	8.05861e-09	4.45606e-08	8.40576e-13
Sigirr	0.000422953	-0.397948	0.304	0.512	1	4.23726e-13	-0.385521	0.227	0.554	8.12452e-09	0.000422953	8.47451e-13
Ace2	0.000108691	-0.415483	0.196	0.456	1	4.40444e-13	-0.466462	0.109	0.436	8.44507e-09	0.000108691	8.80888e-13
Dkc1	0.000134244	0.297207	0.761	0.555	1	4.45654e-13	0.345046	0.832	0.595	8.54497e-09	0.000134244	8.91308e-13
Plscr2	1.49906e-07	-0.771834	0.326	0.68	0.0028743	4.71413e-13	-0.558004	0.571	0.766	9.03887e-09	1.49906e-07	9.42826e-13
Klhdc2	5.16156e-07	0.300344	0.87	0.674	0.00989678	4.85541e-13	0.28954	0.924	0.71	9.30976e-09	5.16156e-07	9.71082e-13
Rpl10a	1.0033e-08	0.390229	1	0.965	0.000192374	4.96577e-13	0.270748	1	0.995	9.52137e-09	1.0033e-08	9.93154e-13
Tcf3	6.95694e-10	0.334716	0.87	0.509	1.33392e-05	5.19908e-13	0.295006	0.748	0.47	9.96872e-09	6.95694e-10	1.03982e-12
Snhg18	0.0264367	-0.310388	0.652	0.698	1	6.31219e-13	-0.484225	0.756	0.866	1.2103e-08	0.0264367	1.26244e-12
Slc22a2	2.40202e-06	-0.743584	0.043	0.392	0.0460563	6.45647e-13	-0.761262	0.017	0.34	1.23796e-08	2.40202e-06	1.29129e-12
Fads3	0.287711	-0.340334	0.478	0.43	1	6.83589e-13	-0.649553	0.193	0.495	1.31071e-08	0.287711	1.36718e-12
Cbx3	9.68284e-09	0.372628	0.957	0.744	0.000185659	7.0406e-13	0.31904	0.924	0.755	1.34996e-08	9.68284e-09	1.40812e-12
Ndn	1.66055e-09	0.30246	0.739	0.369	3.18393e-05	8.24926e-13	0.268212	0.655	0.342	1.58171e-08	1.66055e-09	1.64985e-12
Rpl22l1	6.28353e-06	0.297635	0.978	0.919	0.12048	8.60654e-13	0.29552	0.992	0.979	1.65022e-08	6.28353e-06	1.72131e-12
Rps27a	5.41643e-09	0.379383	1	0.985	0.000103855	9.05287e-13	0.282786	1	0.998	1.7358e-08	5.41643e-09	1.81057e-12
Hnrnpc	2.14205e-10	0.407838	0.978	0.799	4.10717e-06	9.61681e-13	0.343453	0.966	0.879	1.84393e-08	2.14205e-10	1.92336e-12
Bphl	0.0130225	-0.395131	0.717	0.724	1	9.78363e-13	-0.559866	0.664	0.807	1.87591e-08	0.0130225	1.95673e-12
Gcnt1	2.96033e-07	-0.734968	0.152	0.529	0.00567614	1.00915e-12	-0.541486	0.134	0.457	1.93495e-08	2.96033e-07	2.0183e-12
Cnbp	5.32677e-07	0.308386	0.935	0.805	0.0102135	1.03135e-12	0.292095	0.992	0.897	1.97751e-08	5.32677e-07	2.0627e-12
Hebp1	4.79808e-05	-0.466612	0.543	0.689	0.919985	1.04765e-12	-0.475339	0.504	0.724	2.00877e-08	4.79808e-05	2.09531e-12
Ndufa6	1.75319e-07	-0.499479	0.957	0.936	0.00336157	1.11839e-12	-0.398866	0.933	0.971	2.14441e-08	1.75319e-07	2.23679e-12
Rps18	4.54301e-08	0.388741	1	0.968	0.000871077	1.1336e-12	0.273964	0.992	0.995	2.17357e-08	4.54301e-08	2.26721e-12
Slc34a1	3.48569e-10	-2.29691	0.087	0.578	6.68346e-06	1.27069e-12	-1.76435	0.126	0.442	2.43642e-08	3.48569e-10	2.54138e-12
Slc5a1	0.000245471	-0.312401	0.022	0.267	1	1.31365e-12	-0.423945	0.034	0.359	2.51879e-08	0.000245471	2.6273e-12
Cyba	0.00796029	-0.5215	0.935	0.852	1	1.40304e-12	-0.650278	0.95	0.961	2.6902e-08	0.00796029	2.80609e-12
Uqcrfs1	4.08299e-05	-0.494323	0.978	0.904	0.782872	1.43107e-12	-0.454286	0.966	0.954	2.74393e-08	4.08299e-05	2.86213e-12
Atp5f1	8.59676e-06	-0.41629	0.978	0.951	0.164834	1.48559e-12	-0.429245	0.992	0.986	2.84848e-08	8.59676e-06	2.97119e-12
Rps6ka3	8.82565e-09	0.523943	0.717	0.41	0.000169223	1.69354e-12	0.351063	0.655	0.382	3.24719e-08	8.82565e-09	3.38708e-12
Clu	3.3877e-10	0.360176	0.978	0.692	6.49557e-06	1.71556e-12	0.379392	0.933	0.714	3.28942e-08	3.3877e-10	3.43112e-12
Phf14	1.42516e-06	0.349431	0.891	0.622	0.0273259	1.94658e-12	0.261949	0.924	0.682	3.73237e-08	1.42516e-06	3.89316e-12
Cox7b	5.98627e-05	-0.452567	0.978	0.936	1	2.09455e-12	-0.473218	0.966	0.964	4.01609e-08	5.98627e-05	4.1891e-12
Ace	4.38491e-06	-0.44568	0.043	0.384	0.0840762	2.22771e-12	-0.45327	0.134	0.458	4.27141e-08	4.38491e-06	4.45542e-12
G3bp1	3.84722e-05	0.281529	0.957	0.759	0.737665	2.23062e-12	0.270578	0.941	0.858	4.27699e-08	3.84722e-05	4.46124e-12
Pcx	8.28353e-07	-0.873456	0.152	0.503	0.0158828	2.23597e-12	-0.644299	0.042	0.36	4.28724e-08	8.28353e-07	4.47193e-12
Cox8a	1.31885e-05	-0.433873	1	0.974	0.252877	2.2535e-12	-0.454628	1	0.998	4.32086e-08	1.31885e-05	4.507e-12
Usp2	7.4144e-10	-0.570771	0.152	0.619	1.42164e-05	2.25626e-12	-0.409838	0.134	0.463	4.32615e-08	7.4144e-10	4.51251e-12
Ppp1r14b	4.72208e-06	0.360662	0.957	0.878	0.0905411	2.39573e-12	0.333572	0.975	0.913	4.59357e-08	4.72208e-06	4.79146e-12
Itgb6	6.46478e-06	-0.460714	0.217	0.529	0.123956	2.65274e-12	-0.366259	0.126	0.471	5.08637e-08	6.46478e-06	5.30548e-12
Mmp14	6.96126e-12	0.473009	0.783	0.392	1.33475e-07	2.66334e-12	0.253191	0.571	0.285	5.10669e-08	6.96126e-12	5.32668e-12
Amacr	0.000910561	-0.368755	0.391	0.573	1	2.74987e-12	-0.450763	0.303	0.58	5.27261e-08	0.000910561	5.49975e-12
Uqcr10	8.96117e-06	-0.492051	0.978	0.942	0.171821	3.00184e-12	-0.505852	0.958	0.978	5.75572e-08	8.96117e-06	6.00367e-12
Cmtm7	3.03433e-12	0.513409	0.783	0.372	5.81803e-08	6.69677e-07	0.269406	0.487	0.287	0.0128404	6.69677e-07	6.06866e-12
Abhd14b	4.64724e-05	-0.478622	0.37	0.605	0.891062	3.06192e-12	-0.370598	0.429	0.675	5.87093e-08	4.64724e-05	6.12384e-12
Phyh	1.28121e-05	-0.4838	0.457	0.651	0.24566	3.15035e-12	-0.504283	0.496	0.71	6.04049e-08	1.28121e-05	6.30071e-12
Slc6a13	0.0113515	-0.382044	0.348	0.471	1	3.21e-12	-0.604119	0.202	0.493	6.15486e-08	0.0113515	6.42001e-12
Pdap1	2.07107e-07	0.360838	0.978	0.843	0.00397107	3.47878e-12	0.295471	0.975	0.911	6.67021e-08	2.07107e-07	6.95755e-12
Dll1	0.00111728	0.26031	0.261	0.105	1	3.53367e-12	0.339898	0.21	0.048	6.77546e-08	0.00111728	7.06734e-12
Hnrnpu	1.04984e-06	0.378294	0.978	0.831	0.0201296	3.57001e-12	0.319112	1	0.911	6.84513e-08	1.04984e-06	7.14001e-12
Sephs2	0.03389	-0.282564	0.717	0.724	1	3.81555e-12	-0.490278	0.798	0.849	7.31593e-08	0.03389	7.63109e-12
Dhrs4	0.0119848	-0.325498	0.696	0.709	1	3.82769e-12	-0.503868	0.639	0.787	7.33921e-08	0.0119848	7.65538e-12
Mpc2	2.2039e-05	-0.407742	0.978	0.936	0.422576	4.05315e-12	-0.325065	0.992	0.987	7.77151e-08	2.2039e-05	8.1063e-12
Aqp11	0.000588205	-0.329655	0.326	0.52	1	4.17144e-12	-0.352301	0.21	0.526	7.99833e-08	0.000588205	8.34289e-12
Gm19950	0.000131852	-0.510308	0.174	0.456	1	4.22949e-12	-0.610986	0.101	0.411	8.10961e-08	0.000131852	8.45897e-12
Fam60a	1.23147e-05	0.316437	0.696	0.456	0.236123	4.23788e-12	0.307642	0.739	0.495	8.1257e-08	1.23147e-05	8.47575e-12
Gsta2	3.06139e-07	-0.910778	0.043	0.439	0.00586992	4.45287e-12	-0.826235	0.042	0.354	8.53794e-08	3.06139e-07	8.90575e-12
Snrpd3	9.27583e-07	0.315345	0.935	0.788	0.0177855	4.56442e-12	0.296457	0.95	0.842	8.75182e-08	9.27583e-07	9.12884e-12
Ccdc80	1.66603e-05	0.270192	0.413	0.154	0.319444	4.83829e-12	0.345623	0.294	0.09	9.27694e-08	1.66603e-05	9.67658e-12
Rps20	2.82662e-08	0.369848	1	0.977	0.000541976	5.04342e-12	0.274816	1	0.991	9.67026e-08	2.82662e-08	1.00868e-11
Lyar	5.68999e-08	0.36703	0.891	0.561	0.001091	5.39682e-12	0.292904	0.798	0.577	1.03479e-07	5.68999e-08	1.07936e-11
Hist1h2ap	7.18338e-06	0.428138	0.804	0.544	0.137734	5.78588e-12	0.279687	0.706	0.41	1.10938e-07	7.18338e-06	1.15718e-11
Rsl1d1	5.16025e-05	0.277979	0.891	0.721	0.989425	5.98172e-12	0.295321	0.933	0.799	1.14694e-07	5.16025e-05	1.19634e-11
Spink1	1.04e-10	-1.77933	0.152	0.628	1.9941e-06	6.90052e-12	-1.25822	0.235	0.506	1.32311e-07	1.04e-10	1.3801e-11
Atp5c1	0.00111504	-0.344826	0.978	0.942	1	7.2095e-12	-0.399934	0.975	0.984	1.38235e-07	0.00111504	1.4419e-11
Cldn10	1.07893e-06	-1.1018	0.283	0.567	0.0206875	7.51854e-12	-0.881154	0.134	0.451	1.4416e-07	1.07893e-06	1.50371e-11
Cdkl1	1.91616e-06	-0.577065	0.261	0.587	0.0367405	8.05315e-12	-0.513	0.168	0.487	1.54411e-07	1.91616e-06	1.61063e-11
Acadl	0.00208901	-0.424886	0.739	0.747	1	9.02322e-12	-0.34752	0.84	0.901	1.73011e-07	0.00208901	1.80464e-11
Fut9	7.21202e-07	-1.10036	0.261	0.555	0.0138283	9.22938e-12	-0.674271	0.395	0.621	1.76964e-07	7.21202e-07	1.84588e-11
Hnrnpdl	1.10536e-05	0.258654	0.935	0.735	0.211942	9.6088e-12	0.318395	0.882	0.721	1.84239e-07	1.10536e-05	1.92176e-11
Etfb	0.000216957	-0.447719	0.913	0.86	1	9.63374e-12	-0.439383	0.941	0.945	1.84717e-07	0.000216957	1.92675e-11
Uhrf2	9.87043e-12	0.488418	0.913	0.529	1.89256e-07	7.8586e-11	0.311534	0.765	0.522	1.50681e-06	7.8586e-11	1.97409e-11
Rps2	9.47086e-11	0.45212	1	0.985	1.81594e-06	9.90718e-12	0.261445	1	0.994	1.8996e-07	9.47086e-11	1.98144e-11
Anp32a	1.73668e-07	0.368174	0.978	0.814	0.00332991	1.07621e-11	0.319614	0.983	0.904	2.06352e-07	1.73668e-07	2.15241e-11
Dcxr	2.82552e-06	-0.670152	0.37	0.625	0.0541765	1.21668e-11	-0.55312	0.345	0.593	2.33286e-07	2.82552e-06	2.43336e-11
Ndufb8	5.16588e-06	-0.515695	1	0.933	0.0990505	1.25177e-11	-0.50948	0.983	0.974	2.40015e-07	5.16588e-06	2.50355e-11
Cdkn1c	3.0083e-08	0.382217	0.891	0.677	0.000576812	1.33456e-11	0.27925	0.765	0.511	2.55888e-07	3.0083e-08	2.66912e-11
Bhmt2	0.000282355	-0.265992	0	0.233	1	1.3548e-11	-0.434148	0.017	0.314	2.59769e-07	0.000282355	2.70959e-11
Jag1	3.87881e-11	0.323635	0.761	0.311	7.43722e-07	1.51126e-11	0.323478	0.664	0.364	2.89768e-07	3.87881e-11	3.02251e-11
Acy3	1.61884e-05	-0.707746	0.239	0.515	0.310396	1.52336e-11	-0.769331	0.261	0.524	2.92089e-07	1.61884e-05	3.04672e-11
Keg1	2.22021e-05	-0.906719	0.348	0.549	0.425704	1.66784e-11	-0.828848	0.353	0.577	3.19792e-07	2.22021e-05	3.33568e-11
Eif5a	6.37116e-05	0.334092	1	0.91	1	1.94683e-11	0.302055	0.992	0.978	3.73286e-07	6.37116e-05	3.89367e-11
Zc3h13	2.14569e-06	0.39738	0.891	0.651	0.0411414	2.04792e-11	0.343673	0.882	0.703	3.92668e-07	2.14569e-06	4.09584e-11
Clrn3	9.70653e-06	-0.424142	0.109	0.436	0.186113	2.33946e-11	-0.340803	0.067	0.37	4.48567e-07	9.70653e-06	4.67891e-11
Sfr1	2.35676e-06	0.2963	0.913	0.738	0.0451886	2.39243e-11	0.276235	0.966	0.847	4.58724e-07	2.35676e-06	4.78485e-11
Adhfe1	1.74299e-05	-0.268574	0.065	0.387	0.334201	2.48377e-11	-0.303497	0.008	0.299	4.76238e-07	1.74299e-05	4.96754e-11
Arglu1	6.32848e-07	0.306267	0.935	0.773	0.0121342	2.57262e-11	0.252533	0.941	0.824	4.93273e-07	6.32848e-07	5.14523e-11
Pafah1b3	2.62642e-11	0.403091	0.978	0.73	5.0359e-07	1.1109e-09	0.271914	0.958	0.793	2.13005e-05	1.1109e-09	5.25285e-11
Hnrnpd	6.08244e-09	0.475906	0.957	0.811	0.000116625	2.6266e-11	0.307968	0.966	0.883	5.03623e-07	6.08244e-09	5.25319e-11
Ndufb4	6.28515e-06	-0.436813	0.957	0.858	0.120511	2.63778e-11	-0.430753	0.958	0.952	5.05769e-07	6.28515e-06	5.27557e-11
Rps25	4.67588e-06	0.297094	0.978	0.936	0.0896553	2.79501e-11	0.283969	0.992	0.979	5.35915e-07	4.67588e-06	5.59002e-11
Slc38a1	6.38489e-08	0.312405	0.826	0.407	0.00122424	2.95391e-11	0.262638	0.664	0.383	5.66382e-07	6.38489e-08	5.90782e-11
Rnase4	2.15679e-07	0.449022	0.435	0.142	0.00413542	3.06136e-11	0.30751	0.277	0.085	5.86986e-07	2.15679e-07	6.12272e-11
Snrnp40	9.93242e-07	0.28529	0.891	0.578	0.0190444	3.31855e-11	0.258983	0.782	0.556	6.36298e-07	9.93242e-07	6.63709e-11
Tsn	2.79797e-07	0.33051	0.957	0.756	0.00536482	3.37431e-11	0.288769	0.975	0.829	6.4699e-07	2.79797e-07	6.74861e-11
Ccnd1	0.0195465	0.267727	0.63	0.506	1	3.3795e-11	0.650101	0.756	0.501	6.47985e-07	0.0195465	6.759e-11
Slc3a1	4.10707e-07	-0.727679	0.022	0.41	0.0078749	3.53778e-11	-0.605485	0.042	0.333	6.78334e-07	4.10707e-07	7.07556e-11
Thnsl2	0.00943103	-0.456007	0.457	0.52	1	3.66895e-11	-0.594454	0.462	0.627	7.03484e-07	0.00943103	7.3379e-11
Tpm1	3.7976e-11	0.886478	0.913	0.683	7.28152e-07	4.45055e-10	0.820936	0.849	0.735	8.53348e-06	4.45055e-10	7.5952e-11
Rcn2	3.90723e-11	0.402739	0.848	0.419	7.49173e-07	1.51586e-10	0.300908	0.723	0.491	2.90651e-06	1.51586e-10	7.81447e-11
Atp5l	0.000100006	-0.42256	1	0.948	1	4.06632e-11	-0.39661	0.975	0.991	7.79675e-07	0.000100006	8.13263e-11
Gcat	1.37909e-05	-0.529051	0.457	0.642	0.264427	4.09823e-11	-0.420566	0.42	0.666	7.85795e-07	1.37909e-05	8.19646e-11
Csnk1e	2.25889e-10	0.356044	0.848	0.462	4.3312e-06	4.4631e-11	0.256606	0.714	0.449	8.55754e-07	2.25889e-10	8.92619e-11
Sf3b1	7.81327e-06	0.294874	0.935	0.782	0.149812	4.48861e-11	0.252204	0.983	0.873	8.60647e-07	7.81327e-06	8.97723e-11
Slc25a5	1.8016e-08	-0.736039	0.978	0.953	0.000345438	4.71935e-11	-0.772213	0.966	0.959	9.04888e-07	1.8016e-08	9.4387e-11
Ewsr1	1.84601e-07	0.31276	0.935	0.747	0.00353954	4.73669e-11	0.291931	0.95	0.792	9.08212e-07	1.84601e-07	9.47337e-11
Mfsd4b1	2.20355e-05	-0.348962	0.043	0.355	0.422509	4.81615e-11	-0.280821	0.008	0.291	9.23449e-07	2.20355e-05	9.63231e-11
Ezr	0.0133991	-0.270913	0.978	0.849	1	5.34477e-11	-0.280246	0.966	0.973	1.02481e-06	0.0133991	1.06895e-10
Palld	6.72537e-05	0.338084	0.587	0.366	1	5.54077e-11	0.370312	0.504	0.261	1.06239e-06	6.72537e-05	1.10815e-10
Mcrip2	1.52892e-08	-0.657816	0.413	0.715	0.000293155	5.7912e-11	-0.470636	0.403	0.632	1.1104e-06	1.52892e-08	1.15824e-10
Nus1	0.000651345	-0.470296	0.5	0.657	1	5.8701e-11	-0.542849	0.454	0.67	1.12553e-06	0.000651345	1.17402e-10
Suclg1	3.10971e-06	-0.51177	0.957	0.884	0.0596255	5.89958e-11	-0.404981	0.958	0.949	1.13118e-06	3.10971e-06	1.17992e-10
Ndufb11	0.000178195	-0.3334	0.957	0.91	1	6.41704e-11	-0.29535	0.975	0.967	1.2304e-06	0.000178195	1.28341e-10
Tmem27	3.27506e-06	-1.12919	0.435	0.64	0.062796	6.88701e-11	-0.856743	0.487	0.671	1.32051e-06	3.27506e-06	1.3774e-10
Impdh2	3.29355e-05	0.293169	0.935	0.677	0.631506	7.05512e-11	0.266392	0.899	0.72	1.35275e-06	3.29355e-05	1.41102e-10
Cyp4a10	5.63213e-05	-0.317701	0.065	0.346	1	8.12323e-11	-0.377771	0.076	0.362	1.55755e-06	5.63213e-05	1.62465e-10
Abca3	1.28232e-05	-0.457355	0.304	0.581	0.245872	8.21533e-11	-0.358233	0.387	0.629	1.57521e-06	1.28232e-05	1.64307e-10
Larp1b	6.48834e-08	-0.631302	0.457	0.709	0.00124407	8.58458e-11	-0.407881	0.555	0.727	1.64601e-06	6.48834e-08	1.71692e-10
Mfge8	1.35323e-09	0.584797	0.783	0.459	2.59468e-05	8.72465e-11	0.331039	0.555	0.279	1.67286e-06	1.35323e-09	1.74493e-10
Ptov1	9.17852e-11	0.431825	0.978	0.858	1.75989e-06	6.63889e-09	0.297302	0.983	0.892	0.000127294	6.63889e-09	1.8357e-10
Spp2	2.06852e-06	-2.06712	0.217	0.529	0.0396617	9.79707e-11	-1.65767	0.218	0.487	1.87849e-06	2.06852e-06	1.95941e-10
Itgb1	1.57058e-05	0.268519	0.913	0.773	0.301143	9.91862e-11	0.325238	0.924	0.814	1.9018e-06	1.57058e-05	1.98372e-10
Bpnt1	0.000514142	-0.379716	0.413	0.631	1	1.10028e-10	-0.372806	0.303	0.596	2.10967e-06	0.000514142	2.20056e-10
Trmt112	1.63119e-09	0.390128	0.957	0.66	3.12764e-05	1.24225e-10	0.279645	0.966	0.788	2.38189e-06	1.63119e-09	2.4845e-10
Susd3	6.66965e-06	-0.485206	0.109	0.436	0.127884	1.39449e-10	-0.457426	0.084	0.37	2.67379e-06	6.66965e-06	2.78897e-10
Slc22a1	5.11092e-08	-0.765015	0.022	0.453	0.000979968	1.43418e-10	-0.494373	0.008	0.28	2.74991e-06	5.11092e-08	2.86837e-10
Morf4l2	1.44664e-10	0.388704	0.978	0.706	2.77379e-06	1.88678e-09	0.25815	0.866	0.811	3.61771e-05	1.88678e-09	2.89328e-10
Ndufc1	1.4673e-05	-0.447343	0.978	0.916	0.28134	1.56593e-10	-0.42753	0.958	0.958	3.00252e-06	1.4673e-05	3.13187e-10
Tuba1a	1.56997e-10	0.394597	0.804	0.529	3.01025e-06	6.70048e-10	0.891601	0.647	0.432	1.28475e-05	6.70048e-10	3.13993e-10
Cideb	3.41115e-05	-0.362651	0.152	0.462	0.654054	1.57096e-10	-0.406746	0.244	0.508	3.01216e-06	3.41115e-05	3.14192e-10
Slc2a2	1.44242e-05	-0.644038	0.174	0.48	0.276569	1.60357e-10	-0.406471	0.16	0.446	3.07469e-06	1.44242e-05	3.20715e-10
Mpc1	0.000188405	-0.601827	0.783	0.826	1	1.70638e-10	-0.514137	0.79	0.868	3.27182e-06	0.000188405	3.41276e-10
Lactb2	0.00179448	-0.538112	0.478	0.581	1	1.7318e-10	-0.487164	0.496	0.661	3.32056e-06	0.00179448	3.46361e-10
Sult1d1	1.14851e-07	-1.32665	0.109	0.509	0.00220216	1.75646e-10	-1.21455	0.294	0.522	3.36785e-06	1.14851e-07	3.51293e-10
Nrep	2.74099e-06	0.284658	0.826	0.567	0.0525558	1.8061e-10	0.264443	0.782	0.545	3.46302e-06	2.74099e-06	3.6122e-10
Epha4	2.98501e-06	0.298078	0.522	0.206	0.0572346	1.90589e-10	0.344892	0.37	0.149	3.65435e-06	2.98501e-06	3.81178e-10
Hnrnpa2b1	6.79374e-06	0.270487	0.978	0.898	0.130263	2.09317e-10	0.269571	1	0.952	4.01345e-06	6.79374e-06	4.18635e-10
Sfxn2	2.73398e-05	-0.419717	0.435	0.654	0.524214	2.09331e-10	-0.361637	0.328	0.589	4.0137e-06	2.73398e-05	4.18661e-10
Cyp2j5	5.0125e-05	-0.703894	0.043	0.326	0.961096	2.16056e-10	-0.926612	0.059	0.334	4.14265e-06	5.0125e-05	4.32112e-10
Phip	5.33412e-08	0.414946	0.87	0.561	0.00102276	2.23637e-10	0.306688	0.857	0.605	4.28802e-06	5.33412e-08	4.47274e-10
Cldn7	1.20497e-09	-0.894357	0.261	0.683	2.3104e-05	2.23772e-10	-0.390843	0.294	0.618	4.2906e-06	1.20497e-09	4.47544e-10
Ass1	2.54016e-10	-1.66786	0.109	0.613	4.8705e-06	5.48443e-10	-1.35643	0.134	0.397	1.05158e-05	5.48443e-10	5.08031e-10
Slc22a6	0.00041021	-1.0345	0.283	0.462	1	2.5543e-10	-1.12473	0.244	0.488	4.89761e-06	0.00041021	5.1086e-10
Iah1	0.000979569	-0.580615	0.761	0.744	1	2.62707e-10	-0.591964	0.857	0.834	5.03714e-06	0.000979569	5.25413e-10
Gm4450	3.16978e-05	-0.407613	0.109	0.401	0.607774	2.63156e-10	-0.426908	0.16	0.429	5.04575e-06	3.16978e-05	5.26311e-10
Dkk1	2.69346e-10	0.544863	0.348	0.061	5.16444e-06	3.96415e-07	0.629132	0.311	0.146	0.00760087	3.96415e-07	5.38692e-10
Fuca2	1.05924e-06	-0.634442	0.326	0.648	0.0203099	2.70343e-10	-0.434731	0.353	0.606	5.18355e-06	1.05924e-06	5.40685e-10
Atp5d	0.000111506	-0.289362	1	0.951	1	2.75221e-10	-0.294816	0.992	0.992	5.27709e-06	0.000111506	5.50442e-10
Cct3	2.47371e-07	0.406324	0.978	0.846	0.0047431	2.87668e-10	0.267454	0.958	0.904	5.51575e-06	2.47371e-07	5.75336e-10
Sox4	1.71058e-07	0.461307	0.826	0.605	0.00327987	2.88044e-10	0.360604	0.849	0.657	5.52295e-06	1.71058e-07	5.76087e-10
Abcg2	0.00920045	-0.52547	0.609	0.637	1	3.0391e-10	-0.603066	0.529	0.673	5.82716e-06	0.00920045	6.07819e-10
Slc15a2	5.84073e-08	-0.549221	0.109	0.526	0.0011199	3.15323e-10	-0.339308	0.092	0.374	6.046e-06	5.84073e-08	6.30646e-10
Mt1	3.53278e-10	-1.98002	0.413	0.744	6.77376e-06	1.62421e-06	-1.25506	0.471	0.631	0.0311425	1.62421e-06	7.06557e-10
Sf3a3	3.83228e-10	0.362736	0.957	0.538	7.34802e-06	4.19718e-08	0.255721	0.782	0.577	0.000804767	4.19718e-08	7.66457e-10
Acadvl	0.000963671	-0.399347	0.587	0.73	1	3.89052e-10	-0.407495	0.689	0.795	7.45968e-06	0.000963671	7.78104e-10
Tpr	1.17698e-06	0.296667	0.978	0.808	0.0225673	3.96049e-10	0.250002	0.992	0.894	7.59384e-06	1.17698e-06	7.92098e-10
Oxct1	9.28249e-08	-0.760803	0.87	0.901	0.00177982	4.40558e-10	-0.638847	0.807	0.876	8.44725e-06	9.28249e-08	8.81115e-10
Mme	0.00125108	-0.400357	0.391	0.64	1	4.61297e-10	-0.474438	0.756	0.873	8.8449e-06	0.00125108	9.22593e-10
Etl4	4.46468e-08	0.421447	0.674	0.36	0.000856058	4.86614e-10	0.263792	0.647	0.39	9.33033e-06	4.46468e-08	9.73227e-10
Esd	0.0299797	-0.378512	0.978	0.91	1	5.6375e-10	-0.382869	0.975	0.981	1.08093e-05	0.0299797	1.1275e-09
Tpm4	6.25515e-10	0.409542	0.957	0.637	1.19936e-05	3.33245e-07	0.32039	0.84	0.702	0.00638963	3.33245e-07	1.25103e-09
Erp29	0.0185113	-0.271059	0.87	0.875	1	6.44887e-10	-0.353437	0.95	0.944	1.23651e-05	0.0185113	1.28977e-09
AI314278	2.19806e-05	-0.407957	0.043	0.349	0.421457	6.50056e-10	-0.398462	0.05	0.321	1.24642e-05	2.19806e-05	1.30011e-09
Cgref1	0.00144694	-0.344121	0.239	0.436	1	7.17955e-10	-0.474693	0.202	0.455	1.37661e-05	0.00144694	1.43591e-09
Lamp2	0.0173374	-0.355921	0.804	0.808	1	7.76264e-10	-0.46874	0.79	0.873	1.48841e-05	0.0173374	1.55253e-09
Kcnq1ot1	1.34355e-07	0.5217	0.978	0.756	0.00257612	8.25307e-10	0.307932	0.924	0.775	1.58244e-05	1.34355e-07	1.65061e-09
Ptms	2.8201e-05	0.276885	0.978	0.855	0.540725	9.29773e-10	0.281793	0.975	0.913	1.78275e-05	2.8201e-05	1.85955e-09
Tsc22d1	9.84155e-10	0.780981	0.978	0.799	1.88702e-05	1.9772e-08	0.495115	0.941	0.827	0.000379109	1.9772e-08	1.96831e-09
Rai14	1.23472e-09	0.386715	0.717	0.346	2.36744e-05	9.85178e-10	0.277895	0.487	0.262	1.88898e-05	1.23472e-09	1.97036e-09
Khdrbs1	2.41998e-07	0.29551	0.87	0.689	0.00464008	9.864e-10	0.264932	0.857	0.718	1.89132e-05	2.41998e-07	1.9728e-09
H19	3.69644e-09	1.34984	0.826	0.52	7.08756e-05	1.01344e-09	0.762936	0.538	0.32	1.94318e-05	3.69644e-09	2.02689e-09
Nceh1	0.000725009	-0.343769	0.413	0.602	1	1.01578e-09	-0.410559	0.538	0.735	1.94766e-05	0.000725009	2.03156e-09
Hmgn2	1.11318e-09	0.523125	0.957	0.747	2.13442e-05	1.98287e-09	0.381838	0.899	0.768	3.80195e-05	1.98287e-09	2.22637e-09
Tpmt	0.00274368	-0.320442	0.522	0.666	1	1.12279e-09	-0.457188	0.597	0.762	2.15283e-05	0.00274368	2.24558e-09
Por	0.0249278	-0.289516	0.565	0.666	1	1.18419e-09	-0.390821	0.529	0.706	2.27057e-05	0.0249278	2.36839e-09
Etfa	0.000204554	-0.506331	0.804	0.846	1	1.2281e-09	-0.34999	0.824	0.871	2.35476e-05	0.000204554	2.4562e-09
Bok	1.69057e-08	0.2927	0.609	0.25	0.00032415	1.23089e-09	0.259588	0.319	0.126	2.36011e-05	1.69057e-08	2.46178e-09
Isyna1	1.59856e-07	0.290737	0.826	0.491	0.00306507	1.29982e-09	0.258253	0.782	0.559	2.49228e-05	1.59856e-07	2.59964e-09
Rps26	7.41583e-08	0.409258	1	0.948	0.00142191	1.31906e-09	0.252725	1	0.989	2.52916e-05	7.41583e-08	2.63812e-09
Atp6v0b	3.06304e-06	-0.516172	0.848	0.878	0.0587307	1.36698e-09	-0.333393	0.966	0.935	2.62104e-05	3.06304e-06	2.73395e-09
Pter	0.000871251	-0.512849	0.413	0.561	1	1.40833e-09	-0.713255	0.454	0.622	2.70033e-05	0.000871251	2.81666e-09
Ncl	1.21197e-05	0.255066	1	0.936	0.232383	1.42453e-09	0.335857	0.992	0.974	2.7314e-05	1.21197e-05	2.84907e-09
Afp	1.11108e-07	-0.983935	0.348	0.657	0.00213038	1.50502e-09	-0.502171	0.185	0.452	2.88572e-05	1.11108e-07	3.01003e-09
Pou3f3	0.00164051	-0.305657	0.196	0.451	1	1.52294e-09	-0.397755	0.462	0.7	2.92009e-05	0.00164051	3.04588e-09
Fah	5.47799e-07	-0.5209	0.043	0.422	0.0105035	1.56903e-09	-0.481535	0.101	0.362	3.00846e-05	5.47799e-07	3.13807e-09
Aldob	1.74933e-05	-1.62175	0.413	0.616	0.335417	1.60711e-09	-1.90226	0.328	0.538	3.08147e-05	1.74933e-05	3.21422e-09
Lactb	0.000182533	-0.392856	0.587	0.698	1	1.67076e-09	-0.282765	0.521	0.721	3.20352e-05	0.000182533	3.34152e-09
Ush1c	2.38211e-07	-0.443388	0.109	0.503	0.00456746	1.73544e-09	-0.301325	0.042	0.298	3.32752e-05	2.38211e-07	3.47087e-09
Ndufab1	0.000780539	-0.328909	1	0.898	1	1.93226e-09	-0.341329	0.958	0.967	3.70491e-05	0.000780539	3.86451e-09
Gstz1	0.000632396	-0.513489	0.5	0.613	1	2.04922e-09	-0.493859	0.429	0.622	3.92918e-05	0.000632396	4.09845e-09
Fahd1	6.04777e-06	-0.593352	0.587	0.709	0.11596	2.1481e-09	-0.390542	0.571	0.716	4.11876e-05	6.04777e-06	4.29619e-09
Slc22a19	9.07217e-07	-0.566433	0	0.372	0.017395	2.33014e-09	-0.623939	0.034	0.283	4.46781e-05	9.07217e-07	4.66027e-09
Qdpr	5.22491e-06	-0.72091	0.783	0.799	0.100182	2.48418e-09	-0.57717	0.689	0.799	4.76316e-05	5.22491e-06	4.96835e-09
Cdhr5	7.41784e-07	-0.38286	0.022	0.419	0.014223	2.60288e-09	-0.266955	0.017	0.264	4.99076e-05	7.41784e-07	5.20576e-09
Glul	0.00206352	-0.433761	0.609	0.645	1	2.67796e-09	-0.59346	0.479	0.642	5.13472e-05	0.00206352	5.35592e-09
Tfcp2l1	0.000341447	-0.48078	0.37	0.628	1	3.2103e-09	-0.488875	0.353	0.593	6.15544e-05	0.000341447	6.42061e-09
Slc51b	0.000108866	-0.354534	0.043	0.314	1	3.30908e-09	-0.34589	0.034	0.278	6.34483e-05	0.000108866	6.61816e-09
Magoh	3.43167e-09	0.342821	0.978	0.672	6.57988e-05	3.56126e-09	0.272607	0.916	0.743	6.82836e-05	3.56126e-09	6.86334e-09
Dctpp1	9.56312e-05	0.258657	0.957	0.706	1	3.8317e-09	0.257354	0.933	0.764	7.34689e-05	9.56312e-05	7.66339e-09
Coq9	0.00550572	-0.26909	0.5	0.628	1	4.08822e-09	-0.34138	0.437	0.657	7.83876e-05	0.00550572	8.17645e-09
C130074G19Rik	0.00978933	-0.285569	0.283	0.43	1	4.30472e-09	-0.331555	0.176	0.443	8.25386e-05	0.00978933	8.60943e-09
Acox1	0.00518176	-0.374393	0.457	0.564	1	4.50409e-09	-0.403427	0.328	0.581	8.63615e-05	0.00518176	9.00819e-09
Slc7a13	5.45377e-06	-0.621632	0.022	0.36	0.104571	4.58261e-09	-0.432176	0.025	0.27	8.78669e-05	5.45377e-06	9.16522e-09
Atp5g1	6.98027e-09	-0.68301	1	0.974	0.00013384	5.08417e-09	-0.570896	0.992	0.987	9.74839e-05	6.98027e-09	1.01683e-08
Cryz	0.019452	-0.314684	0.761	0.718	1	5.45039e-09	-0.346849	0.748	0.85	0.000104506	0.019452	1.09008e-08
Rbpms	9.86521e-06	0.358574	0.87	0.718	0.189156	5.61322e-09	0.399356	0.857	0.701	0.000107628	9.86521e-06	1.12264e-08
Atp6v1d	0.0435896	-0.261033	0.783	0.744	1	5.77021e-09	-0.307922	0.664	0.812	0.000110638	0.0435896	1.15404e-08
Slc1a1	1.05422e-05	-0.256902	0.043	0.36	0.202136	5.85024e-09	-0.441596	0.143	0.396	0.000112172	1.05422e-05	1.17005e-08
Gpr137b	0.00479114	-0.340586	0.239	0.398	1	6.14233e-09	-0.302411	0.109	0.361	0.000117773	0.00479114	1.22847e-08
Pls3	6.59004e-09	0.406012	0.717	0.366	0.000126357	2.61146e-08	0.270574	0.487	0.27	0.000500721	2.61146e-08	1.31801e-08
Bnip3	0.000311866	-0.361971	0.435	0.663	1	6.9374e-09	-0.35001	0.588	0.768	0.000133018	0.000311866	1.38748e-08
Gpc4	7.10949e-06	-0.602879	0.522	0.698	0.136317	7.4847e-09	-0.427597	0.681	0.78	0.000143512	7.10949e-06	1.49694e-08
Atp5b	1.08045e-06	-0.496558	1	0.991	0.0207165	9.05344e-09	-0.421619	1	0.997	0.000173591	1.08045e-06	1.81069e-08
Uqcrq	3.36386e-05	-0.581844	0.957	0.927	0.644986	9.18259e-09	-0.577921	0.958	0.945	0.000176067	3.36386e-05	1.83652e-08
Slc22a12	4.87418e-06	-0.392215	0	0.334	0.0934576	1.06338e-08	-0.266587	0.008	0.237	0.000203892	4.87418e-06	2.12676e-08
Pax8	1.0869e-08	0.533444	0.848	0.654	0.000208401	4.11755e-07	0.312948	0.849	0.718	0.007895	4.11755e-07	2.17379e-08
Ndufb7	0.00129312	-0.36954	0.957	0.904	1	1.15519e-08	-0.300752	0.958	0.953	0.000221495	0.00129312	2.31037e-08
Map7	0.000111579	-0.423298	0.413	0.613	1	1.18503e-08	-0.30326	0.286	0.533	0.000227217	0.000111579	2.37005e-08
Ncoa7	0.0259085	-0.275709	0.565	0.608	1	1.23208e-08	-0.401795	0.571	0.718	0.000236239	0.0259085	2.46416e-08
Pim3	0.00592742	-0.366447	0.609	0.683	1	1.29081e-08	-0.50787	0.513	0.664	0.000247499	0.00592742	2.58161e-08
Cda	0.000146065	-0.260944	0.043	0.302	1	1.30728e-08	-0.313622	0.034	0.271	0.000250657	0.000146065	2.61455e-08
Cyp2d26	2.31516e-08	-1.18267	0.022	0.465	0.000443909	1.42979e-08	-0.764127	0.05	0.283	0.000274148	2.31516e-08	2.85958e-08
Cdkn1a	5.23788e-06	-0.708823	0.283	0.587	0.100431	1.58616e-08	-0.644814	0.403	0.607	0.000304131	5.23788e-06	3.17232e-08
Rpl13a	7.0829e-07	0.451689	0.935	0.823	0.0135807	1.65356e-08	0.253934	0.983	0.928	0.000317054	7.0829e-07	3.30712e-08
Fdx1	0.000194562	-0.448001	0.783	0.77	1	1.73062e-08	-0.425959	0.773	0.805	0.000331829	0.000194562	3.46123e-08
Cox6b1	0.000520449	-0.371607	0.957	0.951	1	1.74526e-08	-0.37991	0.992	0.981	0.000334637	0.000520449	3.49053e-08
Gpc3	1.85831e-08	0.481711	0.935	0.692	0.000356312	1.02611e-05	0.352234	0.807	0.716	0.196746	1.02611e-05	3.71662e-08
Mien1	0.0276514	-0.290413	0.761	0.738	1	1.86769e-08	-0.325863	0.798	0.857	0.00035811	0.0276514	3.73537e-08
Fbp2	1.80408e-07	-0.700863	0.022	0.427	0.00345914	1.92129e-08	-0.315578	0.042	0.277	0.000368389	1.80408e-07	3.84258e-08
mt-Co2	6.6078e-06	-0.604314	1	0.985	0.126698	2.02455e-08	-0.355413	1	0.994	0.000388187	6.6078e-06	4.0491e-08
Gpd1	0.00133137	-0.599391	0.37	0.517	1	2.32757e-08	-0.429448	0.134	0.37	0.000446288	0.00133137	4.65514e-08
Gcdh	0.0014022	-0.328835	0.457	0.608	1	2.43748e-08	-0.32412	0.336	0.577	0.000467362	0.0014022	4.87496e-08
Tmigd1	0.000517386	-0.276414	0.022	0.244	1	2.68238e-08	-0.377255	0.034	0.262	0.000514319	0.000517386	5.36475e-08
Kdm5b	8.26418e-08	0.29311	0.848	0.59	0.00158457	2.69076e-08	0.278479	0.874	0.662	0.000515926	8.26418e-08	5.38151e-08
Agpat3	0.0022031	-0.364242	0.717	0.799	1	2.89458e-08	-0.282047	0.84	0.872	0.000555007	0.0022031	5.78916e-08
Cox5a	8.73861e-06	-0.482865	1	0.951	0.167554	3.06898e-08	-0.537229	0.975	0.981	0.000588447	8.73861e-06	6.13797e-08
Itpr1	4.48807e-06	-0.48578	0.37	0.642	0.0860542	3.12987e-08	-0.331829	0.353	0.564	0.000600121	4.48807e-06	6.25974e-08
Uqcrc1	0.000161832	-0.419283	0.935	0.922	1	3.13298e-08	-0.419649	0.924	0.94	0.000600718	0.000161832	6.26597e-08
Ccdc34	1.64086e-05	0.316276	0.891	0.64	0.314619	3.18364e-08	0.289903	0.899	0.749	0.000610431	1.64086e-05	6.36728e-08
Rnf181	6.38399e-05	-0.377004	0.326	0.573	1	3.21472e-08	-0.331139	0.269	0.491	0.000616391	6.38399e-05	6.42945e-08
Ndufa8	1.42729e-06	-0.506127	0.891	0.881	0.0273669	3.22937e-08	-0.340225	0.95	0.936	0.0006192	1.42729e-06	6.45874e-08
Msra	0.0252904	-0.325384	0.435	0.509	1	3.60342e-08	-0.374083	0.193	0.426	0.000690919	0.0252904	7.20683e-08
Tmem150a	1.14794e-05	-0.578856	0.217	0.5	0.220105	3.71497e-08	-0.439512	0.218	0.434	0.000712308	1.14794e-05	7.42994e-08
Slc17a3	4.87418e-06	-0.426458	0	0.334	0.0934576	3.74636e-08	-0.405014	0	0.21	0.000718328	4.87418e-06	7.49273e-08
Mep1b	1.15656e-05	-0.706144	0	0.314	0.221758	4.22731e-08	-0.665108	0.017	0.231	0.000810545	1.15656e-05	8.45462e-08
Bdh1	0.0160408	-0.33457	0.174	0.32	1	4.24085e-08	-0.279433	0.176	0.429	0.00081314	0.0160408	8.4817e-08
Ndufa10	0.00590212	-0.28941	0.913	0.884	1	4.33545e-08	-0.373348	0.899	0.922	0.00083128	0.00590212	8.67091e-08
Mettl7b	1.18294e-06	-0.476049	0	0.366	0.0226817	4.71972e-08	-0.371927	0.017	0.231	0.000904959	1.18294e-06	9.43944e-08
Acsm1	0.000204257	-0.301457	0	0.241	1	5.05262e-08	-0.461581	0.034	0.252	0.00096879	0.000204257	1.01052e-07
Cds1	6.66782e-07	-0.349217	0.13	0.503	0.0127849	5.12053e-08	-0.250503	0.311	0.526	0.00098181	6.66782e-07	1.02411e-07
Gpm6a	4.49919e-06	-0.322224	0.043	0.395	0.0862674	5.45281e-08	-0.254988	0.084	0.321	0.00104552	4.49919e-06	1.09056e-07
Cox7c	6.61121e-08	-0.456142	1	0.983	0.00126763	5.85503e-08	-0.350192	0.983	0.993	0.00112264	6.61121e-08	1.17101e-07
Kif21a	0.00646051	-0.337031	0.674	0.759	1	6.47664e-08	-0.513439	0.63	0.748	0.00124183	0.00646051	1.29533e-07
Ndrg1	0.0350845	-0.57263	0.391	0.532	1	6.69269e-08	-0.915024	0.294	0.504	0.00128326	0.0350845	1.33854e-07
Slc6a20b	0.000132647	-0.302926	0.022	0.279	1	7.10532e-08	-0.264227	0.008	0.215	0.00136237	0.000132647	1.42106e-07
Aqp1	1.53961e-05	-0.528717	0.043	0.358	0.295205	7.19099e-08	-0.472187	0.042	0.258	0.0013788	1.53961e-05	1.4382e-07
Calm3	0.00200381	-0.296399	0.913	0.837	1	7.25874e-08	-0.304926	0.916	0.932	0.00139179	0.00200381	1.45175e-07
Scp2	1.31876e-06	-0.715595	0.848	0.843	0.0252859	8.01818e-08	-0.382302	0.916	0.914	0.00153741	1.31876e-06	1.60364e-07
Ctsl	8.08177e-08	0.503069	1	0.855	0.0015496	1.40787e-07	0.272364	0.983	0.941	0.00269945	1.40787e-07	1.61635e-07
Slc17a1	5.40414e-06	-0.552398	0.022	0.355	0.103619	8.78734e-08	-0.517711	0.034	0.246	0.00168488	5.40414e-06	1.75747e-07
S100a11	1.4868e-05	0.427391	0.891	0.721	0.285079	9.80386e-08	0.611835	0.857	0.769	0.00187979	1.4868e-05	1.96077e-07
Fkbp2	0.00324312	-0.323063	0.783	0.814	1	1.06229e-07	-0.2842	0.866	0.858	0.00203683	0.00324312	2.12457e-07
Cox5b	7.61957e-06	-0.473993	1	0.942	0.146098	1.07439e-07	-0.448131	1	0.971	0.00206003	7.61957e-06	2.14877e-07
Cldn2	0.000586734	-0.395009	0.217	0.5	1	1.07603e-07	-0.467026	0.16	0.383	0.00206318	0.000586734	2.15206e-07
Fggy	1.09423e-07	-0.540988	0.152	0.529	0.00209807	1.63174e-07	-0.287513	0.378	0.585	0.00312871	1.63174e-07	2.18846e-07
Hykk	3.0457e-05	-0.453902	0.174	0.456	0.583982	1.14449e-07	-0.324094	0.176	0.407	0.00219444	3.0457e-05	2.28897e-07
mt-Co1	2.74095e-05	-0.456578	1	0.994	0.525549	1.16836e-07	-0.298688	1	0.995	0.00224021	2.74095e-05	2.33672e-07
Ndufs6	0.00671487	-0.25371	0.891	0.887	1	1.17127e-07	-0.259489	0.958	0.941	0.00224579	0.00671487	2.34253e-07
Uqcr11	1.17622e-07	-0.479797	1	0.953	0.00225529	4.32665e-07	-0.392141	0.983	0.981	0.00829593	4.32665e-07	2.35245e-07
Cystm1	4.69109e-05	-0.517952	0.609	0.741	0.899469	1.22472e-07	-0.287562	0.664	0.813	0.00234828	4.69109e-05	2.44944e-07
Cdh16	0.00843697	-0.391447	0.696	0.785	1	1.25924e-07	-0.411357	0.622	0.788	0.00241446	0.00843697	2.51847e-07
Sdhb	0.000879805	-0.455408	0.935	0.863	1	1.39918e-07	-0.482036	0.908	0.903	0.00268278	0.000879805	2.79835e-07
2022-09-04	0.000519807	0.340584	0.804	0.613	1	1.42557e-07	0.30188	0.773	0.614	0.00273338	0.000519807	2.85113e-07
Ndufa3	0.000898922	-0.333668	0.957	0.878	1	1.69553e-07	-0.31744	0.908	0.938	0.00325102	0.000898922	3.39107e-07
2310039H08Rik	0.0257627	-0.274237	0.674	0.715	1	1.82655e-07	-0.348483	0.748	0.777	0.00350222	0.0257627	3.65309e-07
Wwp1	0.000970846	-0.287569	0.5	0.663	1	2.07085e-07	-0.400841	0.538	0.667	0.00397065	0.000970846	4.1417e-07
Pnkd	0.00535218	-0.338801	0.783	0.82	1	2.0938e-07	-0.308746	0.697	0.799	0.00401465	0.00535218	4.1876e-07
Slc7a12	0.00351142	-0.337448	0.022	0.192	1	2.15342e-07	-0.445534	0	0.19	0.00412897	0.00351142	4.30684e-07
Tkfc	4.91823e-07	-0.743158	0.239	0.573	0.00943021	2.15392e-07	-0.494777	0.311	0.493	0.00412992	4.91823e-07	4.30783e-07
Sod3	0.0123596	-0.294929	0.239	0.384	1	2.15454e-07	-0.388144	0.151	0.369	0.00413112	0.0123596	4.30908e-07
Dao	2.18695e-07	-0.677854	0.13	0.5	0.00419326	2.17177e-07	-0.445785	0.134	0.338	0.00416416	2.18695e-07	4.34354e-07
Pa2g4	1.47215e-06	0.3129	0.913	0.698	0.0282271	2.2845e-07	0.28499	0.891	0.774	0.00438029	1.47215e-06	4.56899e-07
Ndufa11	0.00802884	-0.269477	0.913	0.898	1	2.49338e-07	-0.315589	0.95	0.914	0.00478081	0.00802884	4.98676e-07
Ndufv2	2.51994e-07	-0.508125	0.935	0.919	0.00483173	1.56608e-05	-0.288539	0.941	0.95	0.30028	1.56608e-05	5.03988e-07
Hnf4a	0.000287928	-0.55702	0.326	0.512	1	2.55523e-07	-0.420915	0.336	0.52	0.0048994	0.000287928	5.11046e-07
Hgd	7.53669e-05	-0.409828	0	0.267	1	2.58039e-07	-0.334476	0	0.188	0.00494764	7.53669e-05	5.16078e-07
Hspb1	0.000594453	0.345663	0.413	0.203	1	2.67159e-07	1.09223	0.387	0.207	0.00512251	0.000594453	5.34318e-07
Cmbl	0.0015089	-0.348838	0.13	0.334	1	2.72985e-07	-0.394872	0.059	0.266	0.00523422	0.0015089	5.4597e-07
Acot1	0.120465	-0.269025	0.696	0.677	1	2.86757e-07	-0.452218	0.697	0.796	0.00549828	0.120465	5.73515e-07
Lpcat3	0.000484325	-0.375318	0.543	0.73	1	2.8777e-07	-0.294321	0.748	0.792	0.00551771	0.000484325	5.75541e-07
Sord	5.0794e-06	-0.696038	0.239	0.541	0.0973925	2.97697e-07	-0.357624	0.21	0.44	0.00570804	5.0794e-06	5.95394e-07
mt-Atp6	2.37864e-05	-0.53297	1	0.997	0.45608	3.11984e-07	-0.348618	1	1	0.00598198	2.37864e-05	6.23968e-07
Atp5j2	4.2647e-06	-0.37469	0.935	0.959	0.0817714	3.30943e-07	-0.284127	0.992	0.981	0.00634551	4.2647e-06	6.61886e-07
Acat1	0.0334854	-0.412414	0.804	0.826	1	3.34117e-07	-0.38929	0.807	0.849	0.00640636	0.0334854	6.68234e-07
Gm16010	0.00135774	-0.346231	0.109	0.326	1	3.39676e-07	-0.277615	0.067	0.272	0.00651295	0.00135774	6.79352e-07
Uncx	0.000196064	0.362109	0.457	0.224	1	3.47246e-07	0.544608	0.412	0.216	0.0066581	0.000196064	6.94492e-07
Uqcrc2	9.38149e-05	-0.418711	0.891	0.892	1	4.02764e-07	-0.318165	0.975	0.959	0.00772259	9.38149e-05	8.05527e-07
Gss	0.000726025	-0.535664	0.391	0.57	1	4.17994e-07	-0.544815	0.479	0.638	0.00801462	0.000726025	8.35988e-07
Eci3	0.000183726	-0.25174	0.065	0.32	1	4.22092e-07	-0.288961	0.025	0.22	0.00809319	0.000183726	8.44184e-07
Gas2	0.0268078	-0.463641	0.522	0.567	1	4.46785e-07	-0.676532	0.395	0.536	0.00856665	0.0268078	8.93569e-07
mt-Nd1	1.36668e-06	-0.634413	1	0.965	0.0262046	4.70164e-07	-0.35172	1	0.991	0.00901493	1.36668e-06	9.40328e-07
Gm42418	5.53166e-06	-1.10221	1	1	0.106064	4.85058e-07	-0.799279	1	1	0.00930051	5.53166e-06	9.70116e-07
Ddt	0.0569984	-0.350027	0.761	0.721	1	5.07121e-07	-0.287082	0.857	0.858	0.00972353	0.0569984	1.01424e-06
Gpx4	0.00147824	-0.358539	0.978	0.948	1	5.28915e-07	-0.413491	0.975	0.974	0.0101414	0.00147824	1.05783e-06
Slc25a13	0.00315745	-0.337983	0.457	0.578	1	5.55106e-07	-0.308539	0.471	0.643	0.0106436	0.00315745	1.11021e-06
Lsp1	2.11745e-06	0.790612	0.652	0.43	0.0406	5.80748e-07	0.32368	0.479	0.291	0.0111353	2.11745e-06	1.1615e-06
Apom	6.14572e-06	-0.486748	0.022	0.36	0.117838	5.92584e-07	-0.385029	0.076	0.28	0.0113622	6.14572e-06	1.18517e-06
Cib1	0.00020087	-0.364151	0.696	0.77	1	5.95355e-07	-0.351073	0.714	0.789	0.0114153	0.00020087	1.19071e-06
Lgmn	6.0713e-06	-0.698396	0.674	0.776	0.116411	6.00218e-07	-0.390631	0.815	0.861	0.0115086	6.0713e-06	1.20044e-06
Kap	0.0180683	-0.804261	0	0.11	1	6.60471e-07	-2.42915	0.05	0.247	0.0126639	0.0180683	1.32094e-06
Ndufs1	0.000175887	-0.4641	0.717	0.773	1	6.80704e-07	-0.381284	0.681	0.762	0.0130518	0.000175887	1.36141e-06
Csad	0.000756249	-0.658262	0.609	0.68	1	6.86172e-07	-0.626036	0.462	0.616	0.0131567	0.000756249	1.37234e-06
Cited4	0.00812123	-0.283324	0.065	0.224	1	6.99884e-07	-0.259789	0.025	0.221	0.0134196	0.00812123	1.39977e-06
Idh1	0.0615603	-0.50046	0.761	0.741	1	7.02126e-07	-0.555087	0.58	0.712	0.0134626	0.0615603	1.40425e-06
Slc47a1	5.83751e-05	-0.52212	0.217	0.477	1	8.0041e-07	-0.359228	0.176	0.382	0.0153471	5.83751e-05	1.60082e-06
Smim24	0.00215372	-0.346934	0.283	0.488	1	8.04906e-07	-0.371929	0.252	0.455	0.0154333	0.00215372	1.60981e-06
Cldn5	8.28279e-07	0.482557	0.457	0.16	0.0158814	0.000245291	0.260391	0.185	0.086	1	0.000245291	1.65656e-06
Cdv3	2.42219e-05	0.271146	0.935	0.75	0.46443	8.61129e-07	0.270426	0.924	0.812	0.0165113	2.42219e-05	1.72226e-06
Malat1	0.0743117	-0.354153	1	0.997	1	8.99835e-07	-0.473834	1	0.999	0.0172534	0.0743117	1.79967e-06
Sardh	0.00705324	-0.424434	0.435	0.538	1	9.87513e-07	-0.335054	0.176	0.377	0.0189346	0.00705324	1.97502e-06
Mrpl42	3.74883e-05	-0.428189	0.935	0.881	0.7188	9.98453e-07	-0.289936	0.908	0.905	0.0191443	3.74883e-05	1.99691e-06
Atp5h	0.00145045	-0.308369	1	0.953	1	1.27856e-06	-0.308339	0.992	0.988	0.0245151	0.00145045	2.55712e-06
Aldh4a1	6.99462e-05	-0.53211	0.326	0.549	1	1.33842e-06	-0.370068	0.311	0.486	0.0256629	6.99462e-05	2.67684e-06
Kl	5.41957e-05	-0.475747	0.109	0.401	1	1.46997e-06	-0.401089	0.134	0.334	0.0281851	5.41957e-05	2.93993e-06
Slc22a13	0.000432039	-0.346171	0	0.221	1	1.52488e-06	-0.42787	0	0.167	0.029238	0.000432039	3.04975e-06
Atp2a2	0.0763437	-0.255342	0.848	0.756	1	1.69448e-06	-0.324385	0.739	0.789	0.03249	0.0763437	3.38896e-06
Tm9sf2	0.00111051	-0.391443	0.609	0.715	1	1.69705e-06	-0.253722	0.588	0.732	0.0325393	0.00111051	3.3941e-06
Usmg5	0.000204131	-0.452955	0.978	0.91	1	1.82614e-06	-0.41459	0.975	0.952	0.0350143	0.000204131	3.65227e-06
Fmo2	0.000468491	-0.446907	0.065	0.299	1	1.9317e-06	-0.409049	0.05	0.235	0.0370384	0.000468491	3.8634e-06
2010107E04Rik	2.42562e-05	-0.386727	0.957	0.913	0.465088	1.94415e-06	-0.311846	0.966	0.957	0.0372771	2.42562e-05	3.8883e-06
Dlst	2.19707e-06	-0.535059	0.587	0.759	0.0421267	5.23406e-06	-0.321059	0.588	0.694	0.100358	5.23406e-06	4.39414e-06
Atp5k	1.27763e-05	-0.436796	1	0.98	0.244972	2.21863e-06	-0.38391	0.992	0.983	0.0425401	1.27763e-05	4.43726e-06
Mrpl12	1.02422e-05	-0.49629	0.891	0.866	0.196383	2.28366e-06	-0.349224	0.916	0.894	0.0437868	1.02422e-05	4.56731e-06
Ndufb9	2.33398e-06	-0.436769	1	0.942	0.0447517	4.89762e-06	-0.315901	1	0.977	0.093907	4.89762e-06	4.66795e-06
Wfdc15b	0.000188212	-0.595393	0.022	0.273	1	2.35548e-06	-0.607427	0.067	0.25	0.045164	0.000188212	4.71096e-06
Cbr1	0.0655758	-0.588491	0.848	0.782	1	2.36998e-06	-0.572603	0.849	0.91	0.045442	0.0655758	4.73996e-06
Lhx1	2.5223e-06	0.712909	0.674	0.401	0.0483625	4.62959e-05	0.585266	0.563	0.42	0.887677	4.62959e-05	5.04459e-06
Tinag	0.018554	-0.250458	0.326	0.48	1	2.62244e-06	-0.304795	0.328	0.541	0.0502826	0.018554	5.24486e-06
Cox6a1	0.000220406	-0.471292	1	0.933	1	2.95727e-06	-0.368747	0.992	0.957	0.0567027	0.000220406	5.91453e-06
Acot13	0.0456354	-0.419034	0.848	0.788	1	2.96869e-06	-0.479979	0.773	0.824	0.0569217	0.0456354	5.93737e-06
Cltc	0.000457013	-0.498947	0.804	0.782	1	3.10952e-06	-0.328865	0.739	0.807	0.059622	0.000457013	6.21904e-06
Ppargc1a	0.000342759	-0.445224	0.239	0.509	1	3.21318e-06	-0.324072	0.185	0.382	0.0616094	0.000342759	6.42634e-06
Ndufs3	0.000390348	-0.397575	0.913	0.878	1	3.26999e-06	-0.297678	0.916	0.908	0.0626988	0.000390348	6.53997e-06
Atp5o.1	1.43168e-05	-0.43773	0.957	0.962	0.274511	3.3668e-06	-0.389415	0.975	0.985	0.0645549	1.43168e-05	6.73358e-06
Slc22a8	9.13091e-05	-0.553585	0.13	0.398	1	3.3833e-06	-0.434201	0.05	0.231	0.0648714	9.13091e-05	6.76659e-06
Atp2b1	0.00127269	-0.389454	0.848	0.828	1	3.88318e-06	-0.36131	0.765	0.846	0.0744561	0.00127269	7.76635e-06
Atp5g3	3.5801e-05	-0.412545	1	0.939	0.686449	4.04799e-06	-0.370075	0.975	0.976	0.0776161	3.5801e-05	8.09595e-06
Fuom	0.0506914	-0.284283	0.5	0.564	1	4.21987e-06	-0.370655	0.345	0.501	0.0809117	0.0506914	8.43971e-06
Tmbim4	0.0665773	-0.280033	0.87	0.834	1	4.59622e-06	-0.437907	0.866	0.867	0.0881279	0.0665773	9.19242e-06
Ndufs7	0.00444963	-0.284214	0.935	0.858	1	4.70099e-06	-0.284551	0.941	0.936	0.0901368	0.00444963	9.40196e-06
Sdhd	0.0145839	-0.351916	0.891	0.828	1	5.45852e-06	-0.30091	0.882	0.859	0.104662	0.0145839	1.0917e-05
Defb19	4.77693e-05	-0.493816	0	0.279	0.915928	5.74397e-06	-0.360546	0.017	0.18	0.110135	4.77693e-05	1.14879e-05
Immt	0.00674274	-0.279957	0.957	0.826	1	5.82745e-06	-0.279114	0.908	0.914	0.111736	0.00674274	1.16549e-05
Folr1	0.00931427	-0.578885	0.674	0.634	1	5.9011e-06	-0.539515	0.445	0.568	0.113148	0.00931427	1.18022e-05
mt-Nd2	6.26962e-06	-0.588185	1	0.985	0.120214	0.000229957	-0.281953	0.992	0.997	1	0.000229957	1.25392e-05
Mal	3.31504e-05	-1.33719	0.043	0.34	0.635625	6.44952e-06	-0.820641	0.059	0.233	0.123663	3.31504e-05	1.2899e-05
Cryl1	0.000245295	-0.562441	0.239	0.477	1	6.49084e-06	-0.465755	0.126	0.306	0.124455	0.000245295	1.29816e-05
Gpx1	0.0115973	-0.346672	0.978	0.834	1	7.27719e-06	-0.336286	0.916	0.934	0.139533	0.0115973	1.45543e-05
4833439L19Rik	0.000906248	-0.467347	0.609	0.706	1	7.39793e-06	-0.289494	0.521	0.652	0.141848	0.000906248	1.47958e-05
Cela1	0.000209921	-0.834297	0.283	0.526	1	7.55113e-06	-0.473206	0.21	0.405	0.144785	0.000209921	1.51022e-05
Aco1	0.0138141	-0.309964	0.478	0.619	1	7.59756e-06	-0.297691	0.479	0.613	0.145676	0.0138141	1.51951e-05
Eif4a2	0.0455585	-0.293086	0.761	0.782	1	8.86291e-06	-0.310398	0.899	0.882	0.169937	0.0455585	1.77257e-05
Tmem229a	0.0419019	-0.292416	0.413	0.468	1	9.13682e-06	-0.320086	0.303	0.461	0.175189	0.0419019	1.82736e-05
Nr2f2	9.26079e-06	0.312081	0.826	0.686	0.177566	8.81638e-05	0.279777	0.748	0.643	1	8.81638e-05	1.85215e-05
Ldhb	0.100119	-0.332138	1	0.924	1	9.66046e-06	-0.638894	0.933	0.88	0.18523	0.100119	1.93208e-05
Vil1	1.96331e-05	-0.370016	0.152	0.471	0.376444	9.7619e-06	-0.25536	0.092	0.268	0.187175	1.96331e-05	1.95237e-05
Grina	0.00257359	-0.353342	0.609	0.738	1	1.2826e-05	-0.31482	0.672	0.773	0.245926	0.00257359	2.56519e-05
Mdh2	0.0396614	-0.272774	0.978	0.927	1	1.31391e-05	-0.335294	0.975	0.968	0.251929	0.0396614	2.6278e-05
Lamtor5	0.000397826	-0.489359	0.848	0.788	1	1.32621e-05	-0.349777	0.849	0.858	0.254287	0.000397826	2.6524e-05
Tmem213	0.00137216	-1.1772	0.087	0.294	1	1.43705e-05	-0.990479	0.059	0.22	0.27554	0.00137216	2.87408e-05
Arpp19	0.0149539	-0.280059	0.913	0.843	1	1.46195e-05	-0.292012	0.941	0.909	0.280315	0.0149539	2.92388e-05
Spp1	1.50312e-05	-1.38306	0.152	0.494	0.288209	5.60628e-05	-0.738049	0.151	0.328	1	5.60628e-05	3.00622e-05
H1fx	1.58016e-05	0.256181	0.826	0.547	0.302979	0.000108766	0.26727	0.597	0.442	1	0.000108766	3.16029e-05
Lars2	0.0108427	-0.650586	0.804	0.767	1	1.61091e-05	-0.437929	0.622	0.736	0.308876	0.0108427	3.2218e-05
Cox6c	1.76379e-05	-0.443799	1	0.985	0.338189	0.000972435	-0.317074	1	0.992	1	0.000972435	3.52755e-05
mt-Co3	8.61566e-05	-0.469029	1	0.997	1	2.12526e-05	-0.255999	1	0.998	0.407498	8.61566e-05	4.25048e-05
Car4	0.0357745	-0.333567	0.565	0.605	1	2.13197e-05	-0.347316	0.37	0.539	0.408783	0.0357745	4.26389e-05
Mgst3	0.00666053	-0.402006	0.587	0.663	1	2.25105e-05	-0.313612	0.504	0.611	0.431617	0.00666053	4.50206e-05
Ndufa9	0.0337913	-0.270579	0.87	0.811	1	2.26498e-05	-0.278325	0.84	0.845	0.434287	0.0337913	4.5299e-05
Got2	4.66993e-05	-0.539554	0.783	0.837	0.895412	2.42507e-05	-0.34991	0.857	0.847	0.464983	4.66993e-05	4.85008e-05
Dnajc19	2.443e-05	-0.563926	0.783	0.805	0.46842	5.85889e-05	-0.383767	0.756	0.79	1	5.85889e-05	4.88594e-05
Mccc1	0.0142532	-0.288821	0.457	0.561	1	2.44313e-05	-0.278476	0.261	0.441	0.468446	0.0142532	4.88621e-05
Cycs	0.0192657	-0.564738	0.913	0.86	1	2.53104e-05	-0.553075	0.807	0.819	0.485301	0.0192657	5.06201e-05
Ccdc141	0.000642945	-0.260591	0.109	0.343	1	2.56897e-05	-0.252045	0.118	0.282	0.492573	0.000642945	5.13786e-05
Lrp2	0.000553309	-1.30029	0.587	0.666	1	2.61999e-05	-1.07384	0.479	0.56	0.502357	0.000553309	5.23991e-05
Pgm2	0.00719187	-0.313006	0.543	0.619	1	2.69393e-05	-0.254765	0.513	0.633	0.516534	0.00719187	5.38779e-05
Tmem147	0.00946355	-0.322367	0.913	0.817	1	2.80381e-05	-0.257305	0.798	0.85	0.537602	0.00946355	5.60754e-05
mt-Nd4	2.89648e-05	-0.540644	1	0.985	0.555371	0.000152364	-0.269046	1	0.987	1	0.000152364	5.79287e-05
Ctsb	0.00042833	-0.437154	0.848	0.811	1	2.99341e-05	-0.300936	0.765	0.815	0.573957	0.00042833	5.98674e-05
Hagh	0.0195397	-0.271862	0.674	0.674	1	3.26565e-05	-0.254715	0.647	0.709	0.626156	0.0195397	6.5312e-05
Kcnj16	0.000230219	-0.478852	0.283	0.523	1	3.2758e-05	-0.318457	0.176	0.349	0.628102	0.000230219	6.5515e-05
Gatm	0.000250766	-1.2558	0.217	0.448	1	3.32625e-05	-1.02093	0.134	0.293	0.637775	0.000250766	6.65239e-05
Smpdl3a	0.00461653	-0.337276	0.457	0.584	1	3.55889e-05	-0.25474	0.378	0.544	0.682382	0.00461653	7.11766e-05
Dbt	0.00121011	-0.278168	0.37	0.576	1	3.66258e-05	-0.256982	0.412	0.554	0.702262	0.00121011	7.32502e-05
Acsm2	3.70795e-05	-0.864109	0.217	0.497	0.710962	5.26644e-05	-0.849921	0.143	0.293	1	5.26644e-05	7.41576e-05
Slc19a1	4.33104e-05	-0.399402	0.261	0.529	0.830434	0.000369781	-0.284549	0.429	0.534	1	0.000369781	8.6619e-05
Bola3	5.78984e-05	-0.475444	0.652	0.75	1	4.40792e-05	-0.334094	0.622	0.695	0.845175	5.78984e-05	8.81565e-05
Cndp2	5.00759e-05	-0.986238	0.696	0.747	0.960155	0.000975307	-0.474421	0.681	0.696	1	0.000975307	0.000100149
Sdha	0.00703251	-0.362595	0.913	0.849	1	5.23988e-05	-0.264134	0.84	0.896	1	0.00703251	0.000104795
Atp6v0e	0.00529424	-0.465211	0.804	0.849	1	5.40309e-05	-0.290169	0.924	0.898	1	0.00529424	0.000108059
Akr7a5	0.0118194	-0.413662	0.891	0.826	1	5.6113e-05	-0.400812	0.849	0.86	1	0.0118194	0.000112223
Mt2	0.000639514	-0.776223	0.261	0.468	1	5.82157e-05	-0.569527	0.134	0.29	1	0.000639514	0.000116428
Slc4a4	0.000134895	-0.827382	0.348	0.57	1	6.01639e-05	-0.593813	0.378	0.493	1	0.000134895	0.000120324
Cox7a2	0.000312829	-0.35909	0.978	0.945	1	6.89013e-05	-0.307017	1	0.977	1	0.000312829	0.000137798
Atp6v1f	0.229374	-0.292425	0.913	0.887	1	7.85819e-05	-0.253777	0.95	0.94	1	0.229374	0.000157158
mt-Cytb	0.000138401	-0.491247	1	0.985	1	8.23017e-05	-0.292581	0.992	0.989	1	0.000138401	0.000164597
Glb1	0.00494067	-0.271881	0.609	0.677	1	8.58011e-05	-0.280961	0.538	0.67	1	0.00494067	0.000171595
Nudt4	0.0212592	-1.00112	0.739	0.741	1	8.66287e-05	-1.00201	0.605	0.649	1	0.0212592	0.00017325
Atp6v1g1	0.0765797	-0.329674	0.978	0.892	1	8.84115e-05	-0.259657	0.983	0.965	1	0.0765797	0.000176815
Npb	0.00949097	-0.403461	0.109	0.267	1	0.000104901	-0.255736	0.017	0.142	1	0.00949097	0.000209791
Pcbd1	0.000108393	-0.491823	0.891	0.846	1	0.000308507	-0.254786	0.95	0.925	1	0.000308507	0.000216775
Nipsnap1	0.0358464	-0.304798	0.804	0.701	1	0.000128715	-0.26925	0.798	0.773	1	0.0358464	0.000257414
Ndufb6	0.00740293	-0.360164	0.957	0.849	1	0.000144525	-0.251568	0.908	0.916	1	0.00740293	0.000289029
S100a1	0.00439936	-0.480969	0.565	0.715	1	0.000158782	-0.297277	0.756	0.792	1	0.00439936	0.00031754
Tmem52b	0.0044167	-1.3204	0.087	0.262	1	0.000180967	-0.731257	0.034	0.159	1	0.0044167	0.000361902
Ascc1	0.000184636	-0.546878	0.609	0.698	1	0.00141259	-0.306603	0.697	0.688	1	0.00141259	0.000369238
Apoo	0.00599801	-0.32646	0.522	0.68	1	0.000185512	-0.264972	0.462	0.572	1	0.00599801	0.00037099
Clcnkb	0.00200446	-0.616567	0	0.177	1	0.000200617	-0.405957	0.008	0.12	1	0.00200446	0.000401193
Myl12a	0.000216806	0.268347	0.913	0.762	1	0.0142651	0.284747	0.958	0.89	1	0.0142651	0.000433566
Dld	0.00980522	-0.267658	0.87	0.776	1	0.000223025	-0.256464	0.697	0.759	1	0.00980522	0.000446
Tfap2b	0.000227641	-0.659777	0	0.238	1	0.000884629	-0.389516	0.067	0.185	1	0.000884629	0.000455231
Bcam	0.00287203	0.337816	0.826	0.683	1	0.000248779	0.288693	0.723	0.629	1	0.00287203	0.000497496
Scd2	0.00025643	-0.810201	0.783	0.802	1	0.0020163	-0.453362	0.672	0.706	1	0.0020163	0.000512794
Pycard	0.000303051	-0.425233	0.348	0.567	1	0.000269781	-0.255303	0.294	0.445	1	0.000303051	0.00053949
Irx1	0.187049	-0.30521	0.174	0.253	1	0.000290721	-0.273789	0.218	0.388	1	0.187049	0.000581358
Slc9a3r1	0.0547591	-0.338638	0.739	0.721	1	0.000310688	-0.273343	0.605	0.699	1	0.0547591	0.00062128
Ndufv1	0.00694469	-0.330159	0.87	0.855	1	0.000325634	-0.291178	0.866	0.877	1	0.00694469	0.000651161
Neat1	0.132563	-0.558575	0.391	0.485	1	0.000407958	-0.721202	0.429	0.506	1	0.132563	0.00081575
Car2	0.0585548	-0.580136	0.522	0.558	1	0.000465078	-0.627011	0.328	0.439	1	0.0585548	0.000929939
Col4a2	0.00758604	0.401032	0.891	0.762	1	0.000508864	0.256904	0.882	0.79	1	0.00758604	0.00101747
Tubb2a	0.0377898	-0.410352	0.413	0.544	1	0.000518734	-0.278257	0.261	0.422	1	0.0377898	0.0010372
Acmsd	0.00134312	-0.492635	0	0.189	1	0.000576208	-0.262712	0.008	0.106	1	0.00134312	0.00115208
Tcea3	0.00150806	-0.255509	0.217	0.43	1	0.000695899	-0.287253	0.336	0.453	1	0.00150806	0.00139131
Uap1l1	0.0376613	-0.324302	0.283	0.39	1	0.000739777	-0.260026	0.21	0.351	1	0.0376613	0.00147901
Kng2	0.00327895	-0.710305	0	0.163	1	0.000914528	-0.431031	0.034	0.138	1	0.00327895	0.00182822
Tagln	0.0134838	0.409876	0.304	0.169	1	0.00112132	0.777932	0.235	0.13	1	0.0134838	0.00224139
Akr1a1	0.12215	-0.331783	0.978	0.895	1	0.0011784	-0.268663	0.975	0.966	1	0.12215	0.00235541
Umod	0.0103307	-0.384943	0	0.128	1	0.0012005	-0.635465	0.067	0.182	1	0.0103307	0.00239956
Emb	0.256874	-0.254716	0.239	0.305	1	0.00150798	-0.345972	0.176	0.297	1	0.256874	0.00301368
Asl	0.0471209	-0.407972	0.543	0.622	1	0.00163146	-0.273012	0.529	0.612	1	0.0471209	0.00326026
Mecom	0.00801684	-0.656983	0.174	0.328	1	0.0020124	-0.383643	0.185	0.301	1	0.00801684	0.00402075
Gls	0.00229045	-0.302038	0.5	0.657	1	0.0131991	-0.300598	0.513	0.554	1	0.0131991	0.00457565
Slc12a1	0.00244321	-1.41788	0	0.172	1	0.00993652	-1.23096	0.067	0.146	1	0.00993652	0.00488045
Lgals1	0.00467658	0.331821	0.674	0.485	1	0.00297792	0.32864	0.529	0.423	1	0.00467658	0.00594698
Idh3a	0.00392759	-0.377547	0.717	0.733	1	0.00325465	-0.281444	0.672	0.695	1	0.00392759	0.0064987
Car12	0.13723	-0.533071	0.391	0.448	1	0.00328462	-0.372061	0.218	0.321	1	0.13723	0.00655845
Lamb1	0.648855	-0.255897	0.87	0.782	1	0.00376431	-0.264049	0.857	0.857	1	0.648855	0.00751445
Tst	0.00997196	-0.555235	0.63	0.657	1	0.00428939	-0.479255	0.588	0.643	1	0.00997196	0.00856037
Sfxn1	0.0285114	-0.410548	0.848	0.773	1	0.00549668	-0.289098	0.882	0.858	1	0.0285114	0.0109631
Ugt2b37	0.00674777	-0.755946	0.217	0.378	1	0.0165192	-0.379324	0.076	0.151	1	0.0165192	0.01345
Col4a1	0.119505	0.276144	1	0.846	1	0.00765717	0.296745	0.966	0.912	1	0.119505	0.0152557
Dab2	0.00769425	-0.611275	0.565	0.593	1	0.0983351	-0.280364	0.739	0.644	1	0.0983351	0.0153293
Cks2	0.01156	-0.288226	0.674	0.735	1	0.0187024	-0.256355	0.706	0.701	1	0.0187024	0.0229865
Tspo	0.303377	-0.342944	0.565	0.578	1	0.0123011	-0.262792	0.529	0.581	1	0.303377	0.024451
Gabarapl1	0.301854	-0.294462	0.5	0.526	1	0.0138488	-0.360776	0.437	0.506	1	0.301854	0.0275058
Ftl1	0.0865904	-0.462174	1	0.997	1	0.0161505	-0.344006	1	1	1	0.0865904	0.0320402
Slc5a3	0.105978	-0.260916	0.283	0.352	1	0.0242128	-0.266646	0.202	0.272	1	0.105978	0.0478393
Ppp1r1a	0.574574	-0.365128	0.283	0.218	1	0.0412342	-0.45005	0.118	0.181	1	0.574574	0.080768
Gpx3	0.13456	-1.10636	0.478	0.523	1	0.0415925	-0.934848	0.286	0.372	1	0.13456	0.0814552
Tmem37	0.0505812	-0.424059	0.609	0.689	1	0.110899	-0.296379	0.454	0.488	1	0.110899	0.098604
Apoe	0.0743222	-0.770918	0.652	0.669	1	0.215536	-0.360033	0.487	0.535	1	0.215536	0.143121
Dusp9	0.237513	-0.491918	0.261	0.305	1	0.0799426	-0.302543	0.218	0.269	1	0.237513	0.153494
S100g	0.0991137	-2.88627	0.283	0.372	1	0.111535	-2.13464	0.235	0.287	1	0.111535	0.188404
Wfdc2	0.171346	-0.976849	0.609	0.605	1	0.609546	-0.729107	0.403	0.395	1	0.609546	0.313333
Dlk1	0.172822	0.326921	0.348	0.25	1	0.423487	-0.450447	0.118	0.091	1	0.423487	0.315777
Mrps6	0.39379	-0.376721	0.674	0.637	1	0.300226	-0.254813	0.613	0.585	1	0.39379	0.510316

## Sheet: N.tubule.4_DHL.Mut.CTRL.marker
Gene	Mutant_p_val	Mutant_avg_logFC	Mutant_pct.1	Mutant_pct.2	Mutant_p_val_adj	CTRL_p_val	CTRL_avg_logFC	CTRL_pct.1	CTRL_pct.2	CTRL_p_val_adj	max_pval	minimump_p_val
Wnt7b	2.77909e-32	0.999284	0.938	0.067	5.32862e-28	2.5001e-90	1.24987	0.931	0.148	4.7937e-86	2.77909e-32	5.00021e-90
Cdkn2b	3.17646e-31	0.271465	0.562	0.013	6.09055e-27	1.79368e-54	0.360755	0.392	0.021	3.4392e-50	3.17646e-31	3.58736e-54
Ifit3	5.88264e-39	1.14431	0.75	0.021	1.12794e-34	6.01162e-52	0.803482	0.431	0.033	1.15267e-47	5.88264e-39	1.20232e-51
Ifit3b	6.59649e-44	0.678752	0.688	0.011	1.26481e-39	2.50937e-48	0.551276	0.343	0.018	4.81147e-44	6.59649e-44	5.01875e-48
Fosl2	1.14376e-13	0.611915	0.875	0.19	2.19305e-09	2.63531e-47	0.705568	0.882	0.305	5.05294e-43	1.14376e-13	5.27062e-47
Jag1	4.3844e-07	0.500182	0.875	0.342	0.00840665	1.79058e-44	0.91865	0.892	0.346	3.43326e-40	4.3844e-07	3.58116e-44
Foxc1	8.52041e-16	0.907485	0.938	0.203	1.6337e-11	1.42911e-42	0.884003	0.873	0.334	2.74017e-38	8.52041e-16	2.85821e-42
Plau	1.1506e-10	0.914847	0.875	0.243	2.20615e-06	3.30041e-42	1.13487	0.902	0.425	6.32821e-38	1.1506e-10	6.60083e-42
Corin	3.501e-26	0.83259	0.75	0.048	6.71282e-22	7.41502e-41	0.679228	0.569	0.105	1.42176e-36	3.501e-26	1.483e-40
Uncx	2.726e-14	1.0623	0.938	0.222	5.22683e-10	2.83853e-38	1.1016	0.696	0.19	5.44259e-34	2.726e-14	5.67705e-38
Hipk2	1.3317e-07	0.908147	1	0.717	0.0025534	1.39944e-35	1.12374	0.971	0.703	2.68328e-31	1.3317e-07	2.79888e-35
Btg1	4.83486e-11	1.00551	1	0.578	9.27036e-07	3.35923e-34	0.968315	0.961	0.698	6.44099e-30	4.83486e-11	6.71846e-34
Fzd4	2.18905e-05	0.668697	0.812	0.463	0.419729	1.37763e-31	0.823726	0.961	0.671	2.64147e-27	2.18905e-05	2.75527e-31
Ttc36	5.28947e-05	-2.29852	0.438	0.743	1	2.86534e-31	-2.42786	0.304	0.818	5.494e-27	5.28947e-05	5.73068e-31
Nfat5	8.17553e-09	1.23856	1	0.503	0.000156758	3.33878e-31	0.981831	0.912	0.566	6.40177e-27	8.17553e-09	6.67755e-31
Tceal9	3.21263e-06	0.640546	1	0.84	0.0615989	6.24115e-31	0.685652	1	0.889	1.19668e-26	3.21263e-06	1.24823e-30
Id4	3.14952e-09	0.758539	0.875	0.313	6.03889e-05	1.17173e-30	0.744788	0.892	0.43	2.24667e-26	3.14952e-09	2.34345e-30
Marcksl1	9.66497e-07	0.621007	1	0.652	0.0185316	1.82943e-30	0.613335	0.98	0.697	3.50775e-26	9.66497e-07	3.65886e-30
Irx2	3.36004e-20	0.921628	1	0.147	6.44254e-16	5.82124e-29	0.650442	0.637	0.179	1.11617e-24	3.36004e-20	1.16425e-28
Galnt18	4.52195e-07	0.695872	0.938	0.447	0.00867038	1.38669e-28	0.659383	0.843	0.426	2.65884e-24	4.52195e-07	2.77338e-28
Sox4	1.53517e-08	1.21864	1	0.615	0.000294353	2.50606e-28	0.828996	0.951	0.649	4.80511e-24	1.53517e-08	5.01211e-28
Fstl1	9.63189e-08	0.862028	1	0.564	0.00184682	6.38764e-28	0.947825	0.902	0.485	1.22477e-23	9.63189e-08	1.27753e-27
Ldhb	1.57554e-07	-1.56454	0.938	0.933	0.00302094	1.23828e-27	-1.63626	0.667	0.909	2.37428e-23	1.57554e-07	2.47656e-27
Slc38a2	1.54988e-05	0.506468	1	0.676	0.297173	3.44079e-27	0.645395	0.99	0.744	6.59736e-23	1.54988e-05	6.88157e-27
Pth1r	0.00185132	-0.99053	0.75	0.783	1	4.63069e-27	-1.11585	0.402	0.843	8.87888e-23	0.00185132	9.26137e-27
Ptpn14	1.80703e-10	0.717459	0.938	0.345	3.4648e-06	7.99055e-27	0.601305	0.755	0.337	1.53211e-22	1.80703e-10	1.59811e-26
Atp5g1	2.24016e-07	-1.06358	0.938	0.979	0.00429528	1.2292e-26	-0.91939	0.99	0.988	2.35688e-22	2.24016e-07	2.45841e-26
H3f3a	2.31792e-05	0.58672	1	0.947	0.444438	1.46776e-26	0.416154	1	0.981	2.81428e-22	2.31792e-05	2.93552e-26
Hspe1	0.000574107	-0.489369	1	0.957	1	3.48758e-26	-0.628925	1	0.977	6.68708e-22	0.000574107	6.97516e-26
Twsg1	8.60902e-09	0.654111	0.875	0.38	0.000165069	4.70018e-26	0.61932	0.765	0.365	9.01212e-22	8.60902e-09	9.40035e-26
Slc25a5	4.79779e-05	-0.975509	1	0.955	0.919929	8.49259e-26	-1.16205	0.882	0.968	1.62837e-21	4.79779e-05	1.69852e-25
Cd24a	1.93217e-05	0.463544	1	0.743	0.370474	1.03443e-25	0.682676	0.99	0.773	1.98341e-21	1.93217e-05	2.06885e-25
Ggt1	0.0508346	-1.03655	0.938	0.778	1	1.34846e-25	-1.44542	0.608	0.885	2.58554e-21	0.0508346	2.69693e-25
Pamr1	4.5612e-09	0.330937	0.812	0.217	8.74564e-05	1.90591e-25	0.491955	0.598	0.189	3.6544e-21	4.5612e-09	3.81182e-25
Hspd1	4.16427e-05	-0.573341	1	0.949	0.798457	2.6252e-25	-0.698036	0.941	0.973	5.03355e-21	4.16427e-05	5.25039e-25
Basp1	6.70189e-11	0.57712	1	0.345	1.28502e-06	3.01356e-25	0.803192	0.784	0.33	5.7782e-21	6.70189e-11	6.02712e-25
Arhgap29	7.18311e-08	0.417195	0.875	0.332	0.00137729	3.52475e-25	0.522496	0.794	0.383	6.75836e-21	7.18311e-08	7.04951e-25
Atpif1	0.000107162	-0.521225	1	0.971	1	5.58133e-25	-0.643133	1	0.994	1.07016e-20	0.000107162	1.11627e-24
Cd63	0.00140128	-0.630815	1	0.965	1	7.92049e-25	-0.710441	1	0.994	1.51867e-20	0.00140128	1.5841e-24
Ndufb4	0.000556793	-0.559002	0.938	0.866	1	1.23281e-24	-0.685951	0.912	0.957	2.36378e-20	0.000556793	2.46561e-24
Cox5a	3.32194e-05	-0.721096	1	0.955	0.636948	1.67985e-24	-0.926807	0.99	0.979	3.22095e-20	3.32194e-05	3.35971e-24
S100a11	0.0124821	0.699079	0.875	0.735	1	4.1129e-24	0.756081	0.961	0.76	7.88608e-20	0.0124821	8.22581e-24
Mdh1	3.1319e-05	-0.991616	1	0.971	0.600511	5.13239e-24	-1.0971	0.951	0.985	9.84085e-20	3.1319e-05	1.02648e-23
Anxa2	1.89528e-07	1.1469	0.938	0.599	0.00363402	5.13429e-24	1.03584	0.853	0.515	9.84449e-20	1.89528e-07	1.02686e-23
Id3	1.57423e-06	1.00257	1	0.674	0.0301844	5.29867e-24	1.08243	0.912	0.665	1.01597e-19	1.57423e-06	1.05973e-23
Amn	0.00154788	-1.12868	0.25	0.572	1	6.91161e-24	-1.21487	0.098	0.627	1.32523e-19	0.00154788	1.38232e-23
Cpq	4.78854e-09	0.499884	0.938	0.299	9.18155e-05	7.06497e-23	0.491105	0.755	0.382	1.35464e-18	4.78854e-09	1.41299e-22
Atp5a1	4.1202e-06	-0.625612	1	0.989	0.0790007	2.93245e-22	-0.598022	1	0.997	5.62268e-18	4.1202e-06	5.8649e-22
Cryab	1.93452e-05	3.23454	0.562	0.19	0.370924	3.5158e-22	2.53584	0.471	0.136	6.7412e-18	1.93452e-05	7.0316e-22
Slc39a5	0.00319341	-0.850212	0.25	0.537	1	7.58299e-22	-0.94544	0.088	0.602	1.45396e-17	0.00319341	1.5166e-21
Keg1	0.00307179	-1.01492	0.25	0.537	1	8.02647e-22	-1.10094	0.088	0.601	1.53899e-17	0.00307179	1.60529e-21
Vdac1	8.42328e-05	-0.622708	1	0.901	1	2.50475e-21	-0.581961	0.912	0.963	4.80261e-17	8.42328e-05	5.0095e-21
Zfp618	0.000249415	0.396149	0.812	0.521	1	2.91053e-21	0.531111	0.804	0.492	5.58065e-17	0.000249415	5.82106e-21
Gas2	0.00423567	-0.800227	0.312	0.572	1	3.58174e-21	-0.99639	0.059	0.569	6.86763e-17	0.00423567	7.16349e-21
Utrn	3.69648e-05	0.408826	0.938	0.572	0.708763	5.60322e-21	0.536395	0.931	0.701	1.07436e-16	3.69648e-05	1.12064e-20
Bicc1	5.66954e-05	0.721333	1	0.743	1	5.62805e-21	0.560409	0.961	0.786	1.07912e-16	5.66954e-05	1.12561e-20
D030045P18Rik	1.52734e-13	1.07222	0.938	0.265	2.92852e-09	1.00332e-20	0.575241	0.794	0.422	1.92377e-16	1.52734e-13	2.00665e-20
Uqcr11	1.81526e-06	-0.754119	1	0.957	0.0348058	1.32001e-20	-0.650628	0.961	0.983	2.53099e-16	1.81526e-06	2.64002e-20
Bnip3l	1.09888e-05	0.514437	0.938	0.738	0.210699	1.35441e-20	0.503361	0.98	0.879	2.59694e-16	1.09888e-05	2.70882e-20
Calml4	0.0513408	-1.12472	0.75	0.679	1	1.39553e-20	-1.43681	0.48	0.78	2.6758e-16	0.0513408	2.79107e-20
Irx1	4.8961e-12	1.31558	0.875	0.217	9.38778e-08	1.58083e-20	0.735846	0.745	0.329	3.03108e-16	4.8961e-12	3.16166e-20
Selenbp1	0.000416661	-0.787426	0.375	0.658	1	1.61065e-20	-0.728302	0.314	0.724	3.08826e-16	0.000416661	3.2213e-20
Acy3	0.00443128	-0.718523	0.188	0.495	1	1.61474e-20	-0.882523	0.029	0.544	3.09611e-16	0.00443128	3.22949e-20
Mycbp2	3.919e-06	0.585235	0.938	0.655	0.0751429	1.78519e-20	0.555174	0.882	0.649	3.42292e-16	3.919e-06	3.57037e-20
Hspa8	0.00179692	-0.318262	1	0.971	1	2.11737e-20	-0.459413	1	0.992	4.05985e-16	0.00179692	4.23474e-20
0610005C13Rik	0.000718436	-0.857983	0.188	0.567	1	2.97e-20	-0.713319	0.069	0.57	5.69468e-16	0.000718436	5.94e-20
Zfhx3	2.87422e-09	0.546463	0.938	0.406	5.51103e-05	2.98943e-20	0.516145	0.667	0.327	5.73193e-16	2.87422e-09	5.97886e-20
Rtn4	0.000874489	0.549194	1	0.759	1	3.67931e-20	0.454839	0.961	0.842	7.05471e-16	0.000874489	7.35862e-20
Igfbp7	0.00178254	1.07512	1	0.88	1	6.73071e-20	0.802591	1	0.954	1.29055e-15	0.00178254	1.34614e-19
Epha7	2.71862e-12	0.871475	0.938	0.283	5.21269e-08	8.12517e-20	0.434562	0.735	0.357	1.55792e-15	2.71862e-12	1.62503e-19
Ndufa4	2.0991e-06	-0.650492	1	0.949	0.0402482	9.13671e-20	-0.581498	0.99	0.986	1.75187e-15	2.0991e-06	1.82734e-19
Lrp2	0.000277225	-1.9532	0.375	0.668	1	1.02161e-19	-1.55895	0.118	0.596	1.95884e-15	0.000277225	2.04323e-19
Phldb2	0.000552335	0.491967	1	0.698	1	1.59714e-19	0.554078	0.971	0.849	3.06235e-15	0.000552335	3.19428e-19
Marcks	0.000370105	0.41284	0.875	0.537	1	1.68956e-19	0.473229	0.843	0.508	3.23956e-15	0.000370105	3.37912e-19
Ywhaq	0.00153433	0.401281	1	0.842	1	1.92037e-19	0.465889	0.98	0.916	3.68212e-15	0.00153433	3.84074e-19
Cox6c	7.52909e-07	-0.74011	1	0.987	0.0144363	2.19618e-19	-0.626251	0.99	0.993	4.21095e-15	7.52909e-07	4.39235e-19
Psma4	0.00574879	-0.428106	1	0.877	1	2.49332e-19	-0.604552	0.931	0.943	4.78069e-15	0.00574879	4.98664e-19
Epcam	1.88379e-07	0.877292	1	0.807	0.00361197	3.5504e-19	0.623755	0.961	0.852	6.80755e-15	1.88379e-07	7.10081e-19
Fxyd2	0.00178842	-1.1164	0.812	0.885	1	3.94083e-19	-1.47731	0.598	0.892	7.55614e-15	0.00178842	7.88166e-19
Pdzk1	0.00260167	-1.33042	0.375	0.623	1	4.71235e-19	-1.38743	0.196	0.646	9.03546e-15	0.00260167	9.4247e-19
Abcg2	0.0742686	-0.703667	0.75	0.628	1	4.87927e-19	-0.846504	0.294	0.696	9.35552e-15	0.0742686	9.75855e-19
Blmh	0.00121597	0.270183	0.938	0.722	1	4.97764e-19	0.535421	0.931	0.786	9.54412e-15	0.00121597	9.95527e-19
Tead2	7.62598e-05	0.457538	0.75	0.374	1	6.21748e-19	0.37348	0.765	0.382	1.19214e-14	7.62598e-05	1.2435e-18
Etnk1	6.70977e-06	0.71242	1	0.684	0.128653	7.11118e-19	0.803793	0.961	0.793	1.3635e-14	6.70977e-06	1.42224e-18
Uqcr10	3.34174e-06	-0.855028	1	0.944	0.0640744	7.23964e-19	-0.638516	0.971	0.976	1.38813e-14	3.34174e-06	1.44793e-18
Cyc1	4.6967e-05	-0.762324	0.938	0.933	0.900546	8.54293e-19	-0.751641	0.892	0.941	1.63802e-14	4.6967e-05	1.70859e-18
Adamts16	4.24203e-06	0.32379	0.812	0.297	0.0813367	9.45925e-19	0.46479	0.725	0.351	1.81372e-14	4.24203e-06	1.89185e-18
Fam171a2	7.09408e-08	0.258182	0.812	0.235	0.00136022	9.77297e-19	0.415467	0.569	0.226	1.87387e-14	7.09408e-08	1.95459e-18
Pou3f3	2.24244e-06	0.603817	0.875	0.401	0.0429966	1.68294e-18	0.539005	0.941	0.645	3.22686e-14	2.24244e-06	3.36587e-18
Sult1d1	0.00106078	-1.40411	0.062	0.479	1	2.2393e-18	-1.5746	0.088	0.54	4.29363e-14	0.00106078	4.4786e-18
Aldob	0.00098663	-2.44336	0.312	0.604	1	4.28551e-18	-2.41253	0.108	0.557	8.21703e-14	0.00098663	8.57102e-18
Spp2	0.00144316	-2.08444	0.125	0.508	1	4.6116e-18	-1.82032	0.039	0.502	8.84229e-14	0.00144316	9.22321e-18
Atp5b	1.88949e-07	-0.872555	1	0.992	0.0036229	6.11955e-18	-0.592806	1	0.997	1.17336e-13	1.88949e-07	1.22391e-17
Hnf4a	0.00345066	-0.675259	0.188	0.503	1	7.28412e-18	-0.636479	0.088	0.543	1.39666e-13	0.00345066	1.45682e-17
Fbp1	0.0039611	-1.40708	0.125	0.457	1	7.74305e-18	-1.81856	0.059	0.515	1.48465e-13	0.0039611	1.54861e-17
Hao2	0.0307111	-0.854927	0.438	0.535	1	8.25144e-18	-1.11045	0.225	0.652	1.58213e-13	0.0307111	1.65029e-17
Aspa	0.00720035	-0.51019	0.125	0.452	1	8.38808e-18	-0.86105	0.108	0.568	1.60833e-13	0.00720035	1.67762e-17
Ddah2	0.000120334	0.416698	1	0.668	1	1.30929e-17	0.533145	0.99	0.753	2.51044e-13	0.000120334	2.61858e-17
Ube2e3	0.000653708	0.359909	0.938	0.709	1	1.70716e-17	0.501446	0.922	0.756	3.2733e-13	0.000653708	3.41431e-17
Slc9a3r1	0.0600392	-0.592811	0.875	0.717	1	1.79205e-17	-0.687226	0.363	0.722	3.43607e-13	0.0600392	3.58409e-17
Gcnt2	2.70871e-07	0.313552	0.688	0.206	0.00519368	1.89296e-17	0.440846	0.608	0.271	3.62955e-13	2.70871e-07	3.78591e-17
Nrcam	8.45272e-09	0.377943	0.5	0.08	0.000162073	2.65156e-17	0.297809	0.324	0.073	5.0841e-13	8.45272e-09	5.30312e-17
Slc22a6	0.000606152	-1.10986	0	0.46	1	2.77655e-17	-1.28325	0.059	0.504	5.32376e-13	0.000606152	5.55311e-17
Mt1	0.000230086	-1.89834	0.375	0.719	1	2.83484e-17	-1.44551	0.225	0.654	5.43552e-13	0.000230086	5.66967e-17
Atp1a1	0.000177288	-1.38309	1	0.952	1	2.94394e-17	-1.15352	0.873	0.958	5.64471e-13	0.000177288	5.88788e-17
Tmem174	0.00066154	-1.14493	0.062	0.497	1	3.00671e-17	-1.04449	0.039	0.49	5.76506e-13	0.00066154	6.01342e-17
Ccdc112	5.23023e-07	0.417741	0.812	0.291	0.0100285	3.33338e-17	0.407763	0.657	0.319	6.39142e-13	5.23023e-07	6.66676e-17
Capg	5.34535e-10	0.857647	0.875	0.241	1.02492e-05	3.67811e-17	0.604506	0.608	0.28	7.0524e-13	5.34535e-10	7.35621e-17
Pdgfa	4.6219e-11	1.80306	1	0.561	8.86203e-07	3.69794e-17	1.42642	0.804	0.587	7.09043e-13	4.6219e-11	7.39587e-17
Agps	0.00228296	0.265352	0.812	0.468	1	4.19286e-17	0.59331	0.775	0.487	8.03939e-13	0.00228296	8.38572e-17
Thnsl2	0.00205292	-0.629481	0.188	0.527	1	4.97849e-17	-0.717053	0.275	0.644	9.54576e-13	0.00205292	9.95699e-17
Dbi	0.000377662	-1.04358	1	0.92	1	6.87958e-17	-0.887818	0.961	0.969	1.31909e-12	0.000377662	1.37592e-16
Napsa	0.120298	-0.726984	0.5	0.575	1	7.72423e-17	-2.13004	0.206	0.598	1.48104e-12	0.120298	1.54485e-16
Gm1673	0.00031093	0.329503	0.938	0.588	1	8.74449e-17	0.384082	0.873	0.54	1.67667e-12	0.00031093	1.7489e-16
Serpinf2	0.0063717	-0.705779	0.125	0.447	1	8.79446e-17	-0.684851	0.029	0.474	1.68625e-12	0.0063717	1.75889e-16
Lap3	8.03675e-05	-0.83954	0.625	0.791	1	9.24399e-17	-0.675862	0.578	0.841	1.77244e-12	8.03675e-05	1.8488e-16
Pax2	2.01998e-07	0.946686	0.875	0.452	0.00387311	9.87122e-17	0.532004	0.765	0.443	1.89271e-12	2.01998e-07	1.97424e-16
Atp5g3	7.04452e-06	-0.782633	0.938	0.947	0.135072	1.09983e-16	-0.583723	0.971	0.976	2.10882e-12	7.04452e-06	2.19967e-16
Atp5k	1.81662e-06	-0.717615	1	0.981	0.0348319	1.40288e-16	-0.603881	0.971	0.986	2.68989e-12	1.81662e-06	2.80577e-16
Umod	1.40312e-16	0.859322	0.75	0.086	2.69035e-12	1.62881e-14	0.546089	0.431	0.141	3.12307e-10	1.62881e-14	2.80625e-16
Cndp2	0.0127255	-1.03505	0.75	0.741	1	2.13728e-16	-0.845142	0.382	0.728	4.09803e-12	0.0127255	4.27457e-16
Syne2	1.50762e-06	0.724237	1	0.636	0.0289071	2.51583e-16	0.52589	0.951	0.774	4.82384e-12	1.50762e-06	5.03165e-16
Malat1	0.0266924	0.416543	1	0.997	1	2.53804e-16	0.505233	1	0.999	4.86643e-12	0.0266924	5.07607e-16
Pantr1	3.10105e-05	0.358371	0.875	0.404	0.594595	2.70694e-16	0.495691	0.853	0.571	5.19028e-12	3.10105e-05	5.41388e-16
Cycs	0.00411314	-0.776303	0.875	0.866	1	2.91102e-16	-0.855576	0.608	0.84	5.58159e-12	0.00411314	5.82204e-16
Hoxb9	6.23436e-07	0.50816	0.938	0.465	0.0119538	3.79658e-16	0.467837	0.755	0.489	7.27956e-12	6.23436e-07	7.59316e-16
Hoxb3	1.89428e-05	0.374335	0.75	0.353	0.36321	4.85995e-16	0.379387	0.735	0.423	9.31846e-12	1.89428e-05	9.7199e-16
Uqcrq	9.46865e-05	-0.823195	0.875	0.933	1	5.17052e-16	-0.752455	0.882	0.954	9.91396e-12	9.46865e-05	1.0341e-15
Atp5f1	6.26859e-06	-0.646117	1	0.952	0.120194	6.15092e-16	-0.501622	0.99	0.987	1.17938e-11	6.26859e-06	1.23018e-15
2022-09-04	1.35885e-07	1.21792	1	0.62	0.00260546	7.58847e-16	0.675189	0.843	0.61	1.45501e-11	1.35885e-07	1.51769e-15
Atp5j2	2.00794e-06	-0.623121	0.938	0.957	0.0385002	1.18623e-15	-0.441263	0.99	0.981	2.27447e-11	2.00794e-06	2.37246e-15
Cideb	0.0165182	-0.406967	0.188	0.436	1	1.32401e-15	-0.485961	0.098	0.519	2.53866e-11	0.0165182	2.64802e-15
Atxn10	0.0582757	0.29958	0.812	0.775	1	1.34723e-15	0.401893	0.99	0.874	2.58318e-11	0.0582757	2.69447e-15
Cd2ap	0.00348207	0.321238	0.938	0.693	1	1.40769e-15	0.440955	0.922	0.747	2.69911e-11	0.00348207	2.81539e-15
Prmt2	0.000146953	0.264936	0.75	0.361	1	1.46494e-15	0.317171	0.696	0.401	2.80887e-11	0.000146953	2.92988e-15
Atxn7l3b	0.000325269	0.464551	1	0.845	1	1.70787e-15	0.344758	1	0.927	3.27466e-11	0.000325269	3.41573e-15
Ehd1	0.231169	-0.27577	0.625	0.676	1	1.72572e-15	-0.548346	0.373	0.698	3.3089e-11	0.231169	3.45144e-15
Nin	0.000244443	0.257379	0.562	0.214	1	1.95181e-15	0.464553	0.49	0.198	3.7424e-11	0.000244443	3.90362e-15
Pter	0.00171652	-0.850021	0.188	0.559	1	2.41357e-15	-0.835284	0.284	0.637	4.62778e-11	0.00171652	4.82714e-15
Qprt	0.0241466	-0.407653	0.25	0.484	1	2.47745e-15	-0.44173	0.059	0.477	4.75027e-11	0.0241466	4.95491e-15
Cox7b	0.0004414	-0.597984	1	0.939	1	3.15705e-15	-0.547423	0.941	0.967	6.05333e-11	0.0004414	6.3141e-15
Cyp4a31	0.0293161	-0.333831	0.125	0.382	1	4.10293e-15	-0.636163	0.088	0.517	7.86696e-11	0.0293161	8.20586e-15
Tmem37	0.00573895	-0.869947	0.5	0.687	1	4.23708e-15	-0.860736	0.127	0.522	8.12417e-11	0.00573895	8.47415e-15
Acot1	0.0358082	-0.587559	0.688	0.679	1	5.943e-15	-0.661931	0.569	0.808	1.13951e-10	0.0358082	1.1886e-14
Dab2	0.0115905	-0.678044	0.375	0.599	1	6.14827e-15	-0.691137	0.343	0.687	1.17887e-10	0.0115905	1.22965e-14
Lrpap1	0.0267552	-0.789105	0.875	0.824	1	6.87967e-15	-0.883893	0.804	0.879	1.31911e-10	0.0267552	1.37593e-14
Cotl1	0.00602309	-0.755036	0.75	0.743	1	7.23728e-15	-0.641602	0.618	0.832	1.38768e-10	0.00602309	1.44746e-14
Fahd1	0.0161999	-0.552275	0.625	0.698	1	7.90689e-15	-0.490305	0.373	0.735	1.51607e-10	0.0161999	1.58138e-14
Stmn1	4.13807e-05	0.565914	1	0.725	0.793434	9.17225e-15	0.422586	0.902	0.631	1.75869e-10	4.13807e-05	1.83445e-14
Slc25a4	1.83649e-06	-0.68639	1	0.965	0.0352128	9.79848e-15	-0.513689	1	0.987	1.87876e-10	1.83649e-06	1.9597e-14
Ndufab1	0.00161913	-0.477866	1	0.906	1	1.02517e-14	-0.46815	0.961	0.967	1.96566e-10	0.00161913	2.05034e-14
Slc34a1	0.000245095	-2.25773	0.062	0.54	1	1.08642e-14	-1.90225	0.049	0.445	2.08309e-10	0.000245095	2.17283e-14
Hint1	0.0419628	-0.278484	1	0.939	1	1.1211e-14	-0.406881	1	0.977	2.1496e-10	0.0419628	2.24221e-14
Wwc2	1.30782e-05	0.544465	1	0.695	0.250761	1.12875e-14	0.481299	0.951	0.802	2.16426e-10	1.30782e-05	2.2575e-14
Idh1	0.00122981	-1.08376	0.688	0.746	1	1.21526e-14	-0.915827	0.422	0.727	2.33014e-10	0.00122981	2.43052e-14
Nme1	0.0091237	-0.41892	1	0.882	1	1.27646e-14	-0.554846	0.863	0.934	2.44749e-10	0.0091237	2.55293e-14
Hoxb5	8.36158e-12	0.795237	0.938	0.345	1.60325e-07	1.5253e-14	0.444859	0.735	0.443	2.92461e-10	8.36158e-12	3.0506e-14
Spint2	0.00117914	0.372953	1	0.834	1	1.71002e-14	0.411987	0.99	0.883	3.27879e-10	0.00117914	3.42004e-14
Ppp1r15a	0.000127808	0.531054	0.75	0.366	1	1.74846e-14	0.531586	0.765	0.498	3.3525e-10	0.000127808	3.49692e-14
Ace	0.0302011	-0.412184	0.125	0.353	1	1.83723e-14	-0.503184	0.059	0.46	3.52271e-10	0.0302011	3.67446e-14
Cox8a	8.35883e-06	-0.728601	1	0.976	0.160272	1.85604e-14	-0.507786	1	0.998	3.55877e-10	8.35883e-06	3.71207e-14
Cyb5a	0.354227	-0.312846	1	0.853	1	1.95954e-14	-0.679281	0.892	0.942	3.75721e-10	0.354227	3.91907e-14
Ptpn13	0.000232802	0.327435	1	0.684	1	2.04783e-14	0.414392	0.941	0.772	3.92652e-10	0.000232802	4.09567e-14
Id1	2.62311e-05	0.757276	0.875	0.447	0.502956	2.09246e-14	0.731341	0.833	0.573	4.01209e-10	2.62311e-05	4.18493e-14
Akap12	5.06883e-06	0.950444	0.75	0.273	0.0971898	2.12748e-14	0.630633	0.49	0.195	4.07922e-10	5.06883e-06	4.25495e-14
Tuba4a	0.0464064	-0.568095	0.625	0.703	1	2.22577e-14	-0.615195	0.422	0.73	4.2677e-10	0.0464064	4.45155e-14
Slc25a3	0.00923423	-0.38094	1	0.979	1	2.34246e-14	-0.476305	1	0.99	4.49143e-10	0.00923423	4.68492e-14
Epha4	2.51303e-14	1.07278	0.938	0.214	4.81849e-10	1.32893e-10	0.399884	0.382	0.152	2.54809e-06	1.32893e-10	5.02606e-14
Scin	0.000218431	0.257494	0.5	0.152	1	2.52949e-14	0.299319	0.441	0.155	4.85004e-10	0.000218431	5.05898e-14
Aldh1a2	0.00371436	0.272207	0.812	0.508	1	2.87758e-14	0.617545	0.873	0.667	5.51748e-10	0.00371436	5.75517e-14
Mcrip2	0.00834019	-0.575387	0.625	0.682	1	3.22614e-14	-0.541808	0.255	0.644	6.1858e-10	0.00834019	6.45228e-14
Ndufb10	0.000212009	-0.700813	1	0.939	1	3.27784e-14	-0.535831	0.941	0.958	6.28494e-10	0.000212009	6.55569e-14
Ly6a	0.00143012	-1.11672	0.812	0.802	1	3.64364e-14	-1.639	0.324	0.636	6.98631e-10	0.00143012	7.28727e-14
Fads3	0.00566745	-0.539738	0.125	0.449	1	3.66929e-14	-0.664863	0.108	0.498	7.0355e-10	0.00566745	7.33859e-14
Cox7c	1.09898e-07	-0.765758	1	0.984	0.00210719	3.98065e-14	-0.462522	1	0.991	7.63249e-10	1.09898e-07	7.9613e-14
Cubn	0.0183012	-0.625194	0.188	0.433	1	4.1146e-14	-0.557055	0.069	0.472	7.88933e-10	0.0183012	8.22919e-14
Acer2	0.00150476	0.400428	0.75	0.476	1	4.29777e-14	0.50369	0.755	0.546	8.24055e-10	0.00150476	8.59555e-14
Car2	0.0193221	-0.703891	0.312	0.564	1	4.39211e-14	-1.0133	0.078	0.463	8.42143e-10	0.0193221	8.78422e-14
Atp5j	0.00017244	-0.445388	1	0.941	1	4.44845e-14	-0.447211	0.98	0.987	8.52946e-10	0.00017244	8.8969e-14
Gm10639	0.000753529	-1.08415	0.062	0.492	1	4.66717e-14	-0.910684	0.02	0.406	8.94884e-10	0.000753529	9.33435e-14
Gm19950	0.0139819	-0.643763	0.188	0.433	1	5.71503e-14	-0.658011	0.029	0.413	1.0958e-09	0.0139819	1.14301e-13
Oxct1	0.00167987	-0.752501	0.875	0.898	1	5.8617e-14	-0.739638	0.706	0.885	1.12392e-09	0.00167987	1.17234e-13
Slc6a13	0.0112078	-0.510351	0.188	0.468	1	5.93461e-14	-0.607791	0.098	0.498	1.1379e-09	0.0112078	1.18692e-13
Tst	0.00580784	-0.985815	0.562	0.658	1	6.182e-14	-0.875783	0.343	0.668	1.18534e-09	0.00580784	1.2364e-13
Gm4450	0.0787289	-0.320827	0.188	0.374	1	6.37179e-14	-0.460743	0.039	0.437	1.22173e-09	0.0787289	1.27436e-13
Ctxn1	1.14804e-06	0.512386	0.938	0.479	0.0220125	6.72391e-14	0.392568	0.725	0.417	1.28924e-09	1.14804e-06	1.34478e-13
Cox6b1	1.65833e-05	-0.657675	1	0.949	0.317968	7.05019e-14	-0.508415	0.98	0.982	1.3518e-09	1.65833e-05	1.41004e-13
Cited2	4.12485e-05	1.01866	1	0.767	0.790899	8.37927e-14	0.591122	0.98	0.897	1.60664e-09	4.12485e-05	1.67585e-13
Atp6v0a4	0.00569576	-0.512163	0.125	0.471	1	9.96311e-14	-0.439057	0.059	0.45	1.91033e-09	0.00569576	1.99262e-13
Mrpl12	0.000732772	-0.605885	0.938	0.866	1	1.00633e-13	-0.550774	0.814	0.905	1.92953e-09	0.000732772	2.01266e-13
Mrpl50	0.130844	-0.318435	0.625	0.709	1	1.13237e-13	-0.479741	0.608	0.817	2.1712e-09	0.130844	2.26474e-13
Atp5d	0.000603589	-0.386502	1	0.955	1	1.22807e-13	-0.346744	1	0.991	2.35471e-09	0.000603589	2.45615e-13
Bola3	0.103965	-0.376835	0.75	0.738	1	1.2874e-13	-0.489579	0.382	0.719	2.46847e-09	0.103965	2.57481e-13
Sumo2	0.000184367	0.392692	1	0.866	1	1.30914e-13	0.292549	1	0.93	2.51014e-09	0.000184367	2.61827e-13
Hebp1	0.13604	-0.363483	0.75	0.668	1	1.44619e-13	-0.496987	0.412	0.73	2.77292e-09	0.13604	2.89237e-13
Sdhb	0.000384899	-0.696795	0.938	0.869	1	1.5952e-13	-0.64711	0.824	0.912	3.05864e-09	0.000384899	3.1904e-13
Atp5o.1	2.71324e-06	-0.773337	1	0.96	0.0520237	1.60008e-13	-0.551579	1	0.982	3.068e-09	2.71324e-06	3.20017e-13
Slc23a1	0.0620773	-0.468961	0.312	0.436	1	1.679e-13	-0.675728	0.147	0.524	3.21931e-09	0.0620773	3.358e-13
1810037I17Rik	0.0225985	0.343231	0.875	0.695	1	1.84907e-13	0.342008	0.931	0.772	3.54541e-09	0.0225985	3.69814e-13
Atp5c1	3.31974e-05	-0.644035	1	0.944	0.636526	2.29975e-13	-0.448061	0.99	0.982	4.40954e-09	3.31974e-05	4.5995e-13
Ndufa10	0.0474923	-0.31608	1	0.882	1	2.3283e-13	-0.49259	0.833	0.929	4.46429e-09	0.0474923	4.65661e-13
Junb	0.00725628	0.903723	0.688	0.487	1	2.69521e-13	0.721861	0.843	0.659	5.1678e-09	0.00725628	5.39043e-13
Atp1b1	0.757208	-0.40531	1	0.947	1	2.87222e-13	-0.83029	0.961	0.957	5.5072e-09	0.757208	5.74445e-13
Ghr	0.0101989	-0.440828	0.312	0.559	1	3.58924e-13	-0.427636	0.176	0.557	6.88202e-09	0.0101989	7.17849e-13
Gclc	0.00104991	0.29106	0.812	0.436	1	3.61925e-13	0.60659	0.716	0.465	6.93955e-09	0.00104991	7.2385e-13
Ttc3	0.0035569	0.32112	0.938	0.794	1	3.63461e-13	0.373653	0.971	0.841	6.96901e-09	0.0035569	7.26923e-13
Nr2f1	8.37521e-05	0.36984	0.562	0.203	1	3.83111e-13	0.507072	0.471	0.209	7.34578e-09	8.37521e-05	7.66223e-13
Cox6a1	0.000381573	-0.67304	0.938	0.941	1	3.91538e-13	-0.55712	0.912	0.966	7.50736e-09	0.000381573	7.83077e-13
Usp2	0.00451098	-0.490401	0.312	0.575	1	4.02732e-13	-0.437049	0.088	0.462	7.72199e-09	0.00451098	8.05465e-13
Ndufs7	0.00261309	-0.445332	1	0.861	1	4.81619e-13	-0.437958	0.912	0.939	9.23457e-09	0.00261309	9.63239e-13
Ndufc2	0.000368779	-0.538394	0.938	0.906	1	5.01769e-13	-0.415703	0.922	0.948	9.62091e-09	0.000368779	1.00354e-12
Uqcrc1	7.16067e-05	-0.683833	0.938	0.922	1	5.50823e-13	-0.547623	0.931	0.939	1.05615e-08	7.16067e-05	1.10165e-12
Map1b	1.76148e-12	0.733575	1	0.259	3.37747e-08	5.70882e-13	0.554174	0.549	0.263	1.09461e-08	1.76148e-12	1.14176e-12
Ndufv2	0.000387419	-0.590286	0.875	0.922	1	5.87452e-13	-0.452698	0.931	0.95	1.12638e-08	0.000387419	1.1749e-12
Foxp1	1.71327e-05	0.525122	0.875	0.508	0.328503	5.92741e-13	0.38553	0.824	0.579	1.13652e-08	1.71327e-05	1.18548e-12
Cgref1	0.00987309	-0.383282	0.125	0.425	1	6.46966e-13	-0.507088	0.088	0.462	1.24049e-08	0.00987309	1.29393e-12
Rps27	3.32425e-05	0.388916	1	0.981	0.637393	6.50689e-13	0.298852	1	0.991	1.24763e-08	3.32425e-05	1.30138e-12
Cox5b	0.00011639	-0.612881	1	0.947	1	7.37402e-13	-0.564289	0.98	0.973	1.41389e-08	0.00011639	1.4748e-12
Gcat	0.018415	-0.474184	0.438	0.628	1	7.54035e-13	-0.472892	0.333	0.671	1.44579e-08	0.018415	1.50807e-12
Etfb	0.000873172	-0.62889	0.938	0.864	1	8.8737e-13	-0.482604	0.931	0.946	1.70144e-08	0.000873172	1.77474e-12
H2afv	0.00062642	0.440349	1	0.749	1	8.91067e-13	0.322586	0.98	0.822	1.70853e-08	0.00062642	1.78213e-12
Tmbim4	0.0442325	-0.475777	0.938	0.834	1	9.90809e-13	-0.577191	0.686	0.885	1.89978e-08	0.0442325	1.98162e-12
Cys1	0.00529548	0.255078	0.75	0.487	1	1.00847e-12	0.389554	0.843	0.642	1.93363e-08	0.00529548	2.01693e-12
Serf1	0.00406228	0.269079	0.938	0.735	1	1.01589e-12	0.335956	0.971	0.801	1.94787e-08	0.00406228	2.03179e-12
Sod3	0.0027144	-0.411817	0	0.382	1	1.05635e-12	-0.480881	0.02	0.379	2.02545e-08	0.0027144	2.11271e-12
Hdc	9.10978e-05	-1.58335	0	0.545	1	1.0732e-12	-1.10054	0.049	0.414	2.05776e-08	9.10978e-05	2.1464e-12
Sardh	0.00174456	-0.571887	0.188	0.54	1	1.10566e-12	-0.430271	0.029	0.389	2.11999e-08	0.00174456	2.21132e-12
Atp5e	0.000221899	-0.382102	1	0.957	1	1.15902e-12	-0.360479	1	0.986	2.2223e-08	0.000221899	2.31804e-12
Sik1	1.55797e-06	0.35635	0.75	0.262	0.0298725	1.17326e-12	0.333873	0.647	0.392	2.24962e-08	1.55797e-06	2.34653e-12
4931406C07Rik	0.0491111	-1.02896	0.625	0.642	1	1.22178e-12	-0.999917	0.451	0.728	2.34265e-08	0.0491111	2.44357e-12
Cyth2	0.000133866	0.30621	0.938	0.583	1	1.2457e-12	0.256155	0.863	0.6	2.3885e-08	0.000133866	2.49139e-12
Tomm5	0.0035192	-0.525443	0.875	0.829	1	1.28003e-12	-0.516325	0.667	0.856	2.45433e-08	0.0035192	2.56006e-12
Gsta2	0.00165372	-0.883315	0	0.409	1	1.30376e-12	-0.84459	0	0.353	2.49983e-08	0.00165372	2.60752e-12
Cyba	0.20696	-0.48158	1	0.856	1	1.41278e-12	-0.689745	0.98	0.958	2.70886e-08	0.20696	2.82555e-12
Nat8f1	0.000240535	-1.72169	0.062	0.54	1	1.62721e-12	-1.45202	0.275	0.585	3.12e-08	0.000240535	3.25441e-12
Ndufa5	0.00124699	-0.542265	1	0.89	1	1.89276e-12	-0.508892	0.824	0.9	3.62917e-08	0.00124699	3.78551e-12
Dao	0.00305101	-0.640495	0.125	0.471	1	1.95276e-12	-0.50956	0	0.349	3.74421e-08	0.00305101	3.90551e-12
Atp5l	0.00258422	-0.476768	1	0.952	1	2.08432e-12	-0.431462	1	0.988	3.99648e-08	0.00258422	4.16864e-12
Tra2a	1.67055e-06	0.535265	1	0.73	0.0320311	2.47566e-12	0.38297	0.931	0.784	4.74682e-08	1.67055e-06	4.95131e-12
Cks2	0.0361188	-0.491252	0.688	0.73	1	2.61241e-12	-0.601529	0.451	0.728	5.00903e-08	0.0361188	5.22481e-12
Dhrs4	0.182312	-0.345482	0.75	0.706	1	3.05442e-12	-0.546752	0.559	0.793	5.85655e-08	0.182312	6.10885e-12
Gucd1	0.0768413	-0.335088	0.5	0.551	1	3.09371e-12	-0.351507	0.167	0.523	5.93188e-08	0.0768413	6.18742e-12
Mep1a	0.00865592	-1.08234	0.25	0.532	1	3.39242e-12	-1.1525	0.265	0.558	6.50463e-08	0.00865592	6.78484e-12
Ktn1	1.09323e-05	0.509766	1	0.733	0.209616	3.64708e-12	0.32542	0.922	0.75	6.99292e-08	1.09323e-05	7.29417e-12
Mdh2	0.00127308	-0.568139	1	0.93	1	3.67288e-12	-0.485312	0.951	0.971	7.04237e-08	0.00127308	7.34575e-12
Frmd4a	0.000591562	0.30439	0.75	0.374	1	3.67686e-12	0.316203	0.608	0.295	7.05002e-08	0.000591562	7.35373e-12
Col4a2	6.57787e-05	0.479948	1	0.767	1	3.69734e-12	0.45303	0.912	0.788	7.08929e-08	6.57787e-05	7.39469e-12
Maf	0.00616707	-0.806579	0.312	0.58	1	3.95357e-12	-0.749485	0.206	0.554	7.58057e-08	0.00616707	7.90713e-12
Cldn10	0.074094	-0.803814	0.438	0.537	1	3.96145e-12	-0.919369	0.098	0.449	7.59569e-08	0.074094	7.9229e-12
Ndufs3	0.00341992	-0.469934	1	0.877	1	4.37974e-12	-0.449499	0.853	0.914	8.39771e-08	0.00341992	8.75947e-12
Cox7a2	1.20443e-05	-0.697928	1	0.947	0.230937	4.51493e-12	-0.486929	0.961	0.981	8.65693e-08	1.20443e-05	9.02987e-12
Ptbp3	0.000186689	0.523958	0.938	0.693	1	4.68289e-12	0.370253	0.863	0.686	8.97897e-08	0.000186689	9.36577e-12
Fah	0.00223208	-0.493353	0	0.393	1	5.15467e-12	-0.504903	0.02	0.366	9.88356e-08	0.00223208	1.03093e-11
Usmg5	0.000461505	-0.631126	0.938	0.917	1	5.24403e-12	-0.544003	0.922	0.958	1.00549e-07	0.000461505	1.04881e-11
Tmem150a	0.0173626	-0.555851	0.25	0.476	1	5.26244e-12	-0.485012	0.088	0.444	1.00902e-07	0.0173626	1.05249e-11
Rfc3	0.000215388	0.308827	0.875	0.473	1	5.34095e-12	0.366532	0.608	0.378	1.02407e-07	0.000215388	1.06819e-11
Atp5h	0.000497568	-0.47275	1	0.957	1	5.45252e-12	-0.416245	1	0.988	1.04547e-07	0.000497568	1.0905e-11
Tmsb10	1.99289e-06	0.636771	1	0.906	0.0382117	5.73094e-12	0.406327	1	0.942	1.09885e-07	1.99289e-06	1.14619e-11
Cldn2	0.00308413	-0.714233	0.125	0.481	1	6.33944e-12	-0.552289	0.039	0.392	1.21552e-07	0.00308413	1.26789e-11
Ppp2r5a	0.000207787	0.44163	0.875	0.561	1	6.40351e-12	0.487896	0.775	0.621	1.22781e-07	0.000207787	1.2807e-11
Cela1	0.074447	-0.835615	0.438	0.5	1	7.36931e-12	-0.551103	0.069	0.417	1.41299e-07	0.074447	1.47386e-11
Mif	9.4865e-05	-0.599205	1	0.952	1	8.0548e-12	-0.328558	1	0.989	1.54443e-07	9.4865e-05	1.61096e-11
Fmo1	0.0161768	-0.659211	0.188	0.441	1	8.24749e-12	-0.641117	0.059	0.407	1.58137e-07	0.0161768	1.6495e-11
Gpc4	0.00683609	-0.624884	0.562	0.682	1	1.11486e-11	-0.496956	0.559	0.792	2.13764e-07	0.00683609	2.22973e-11
Phb2	0.0120619	-0.32801	1	0.874	1	1.24282e-11	-0.346067	0.922	0.949	2.38299e-07	0.0120619	2.48564e-11
Hykk	0.0513196	-0.323467	0.188	0.433	1	1.25992e-11	-0.38518	0.069	0.414	2.41578e-07	0.0513196	2.51985e-11
Gpd1	0.0359201	-0.680254	0.375	0.505	1	1.32641e-11	-0.477698	0.039	0.376	2.54327e-07	0.0359201	2.65283e-11
Spink1	0.264973	-0.729876	0.625	0.57	1	1.3528e-11	-1.03136	0.167	0.509	2.59385e-07	0.264973	2.70559e-11
Lpp	0.00575714	0.260868	0.875	0.658	1	1.51826e-11	0.327614	0.873	0.654	2.91111e-07	0.00575714	3.03652e-11
Sdc2	9.65325e-10	0.517599	0.938	0.313	1.85091e-05	1.55114e-11	0.365576	0.549	0.296	2.97416e-07	9.65325e-10	3.10229e-11
Amacr	0.012702	-0.4473	0.375	0.559	1	1.56291e-11	-0.47623	0.245	0.581	2.99672e-07	0.012702	3.12582e-11
Phf3	0.000145764	0.404241	0.875	0.698	1	1.65628e-11	0.349291	0.931	0.802	3.17575e-07	0.000145764	3.31256e-11
Nfib	3.21678e-05	0.341523	0.875	0.393	0.616785	1.6672e-11	0.322856	0.735	0.478	3.1967e-07	3.21678e-05	3.33441e-11
Ndufa9	0.0604595	-0.318605	0.875	0.816	1	1.98766e-11	-0.427845	0.676	0.862	3.81113e-07	0.0604595	3.97531e-11
Lpgat1	0.0024666	0.29967	0.812	0.575	1	2.02679e-11	0.426243	0.794	0.608	3.88618e-07	0.0024666	4.05359e-11
Mcur1	0.0126678	-0.470623	0.438	0.607	1	2.11007e-11	-0.430255	0.265	0.596	4.04586e-07	0.0126678	4.22015e-11
Cyp4a10	0.00718947	-0.308842	0	0.326	1	2.3508e-11	-0.386212	0.029	0.362	4.50743e-07	0.00718947	4.70161e-11
Uqcrfs1	0.000755259	-0.658598	0.812	0.917	1	2.36707e-11	-0.486931	0.882	0.963	4.53861e-07	0.000755259	4.73413e-11
Susd3	0.00405888	-0.513244	0.062	0.412	1	2.47872e-11	-0.490761	0.039	0.369	4.75269e-07	0.00405888	4.95743e-11
Tkfc	0.00933316	-0.71189	0.312	0.543	1	2.71456e-11	-0.563147	0.176	0.504	5.20489e-07	0.00933316	5.42912e-11
Tax1bp3	0.102626	0.303047	0.688	0.524	1	2.77803e-11	0.313721	0.784	0.571	5.3266e-07	0.102626	5.55607e-11
Nedd4	0.000195569	0.43837	1	0.882	1	2.79231e-11	0.281276	1	0.951	5.35398e-07	0.000195569	5.58462e-11
Gipc2	0.0228905	-0.560199	0.438	0.591	1	2.86261e-11	-0.558692	0.382	0.677	5.48877e-07	0.0228905	5.72522e-11
C1qbp	0.154712	-0.273353	1	0.853	1	2.99746e-11	-0.375661	0.833	0.917	5.74734e-07	0.154712	5.99493e-11
Arrdc3	4.01304e-07	0.600108	0.875	0.302	0.00769461	3.31163e-11	0.400863	0.559	0.308	6.34973e-07	4.01304e-07	6.62327e-11
Dsp	1.65373e-05	0.629741	0.812	0.382	0.317086	3.46315e-11	0.439065	0.559	0.312	6.64025e-07	1.65373e-05	6.9263e-11
Gstz1	0.276383	-0.375139	0.688	0.596	1	3.78678e-11	-0.53924	0.333	0.628	7.26078e-07	0.276383	7.57356e-11
Gm45792	0.0361726	-0.490506	0.125	0.364	1	4.00997e-11	-0.549853	0.02	0.341	7.68872e-07	0.0361726	8.01994e-11
Tpm1	4.86909e-07	0.822932	1	0.698	0.00933599	4.01248e-11	0.611085	0.892	0.733	7.69352e-07	4.86909e-07	8.02495e-11
C130074G19Rik	0.0287291	-0.350019	0.188	0.422	1	4.73898e-11	-0.346052	0.098	0.447	9.08653e-07	0.0287291	9.47797e-11
Suclg1	0.0034765	-0.507708	1	0.888	1	4.86032e-11	-0.430172	0.961	0.948	9.31919e-07	0.0034765	9.72065e-11
Tkt	0.0354412	-0.42487	0.875	0.861	1	5.38613e-11	-0.546764	0.637	0.844	1.03274e-06	0.0354412	1.07723e-10
Slc4a4	0.0717063	-0.857631	0.5	0.545	1	5.89154e-11	-0.665448	0.167	0.513	1.12964e-06	0.0717063	1.17831e-10
Fus	0.00240306	0.301329	1	0.799	1	6.05915e-11	0.337641	0.961	0.866	1.16178e-06	0.00240306	1.21183e-10
Slc2a2	0.00153755	-0.689129	0.062	0.46	1	6.10768e-11	-0.431113	0.118	0.446	1.17109e-06	0.00153755	1.22154e-10
Acy1	0.149479	-0.296219	0.312	0.43	1	6.69868e-11	-0.499297	0.137	0.481	1.28441e-06	0.149479	1.33974e-10
Akr7a5	0.548241	-0.286231	1	0.826	1	7.60033e-11	-0.589272	0.794	0.866	1.45729e-06	0.548241	1.52007e-10
Pkm	0.00766839	0.256288	1	0.824	1	8.18343e-11	0.400613	0.99	0.88	1.56909e-06	0.00766839	1.63669e-10
Tmem229a	0.0826424	-0.320862	0.312	0.468	1	8.62602e-11	-0.392579	0.137	0.476	1.65395e-06	0.0826424	1.7252e-10
Pcx	0.00273057	-0.852161	0.125	0.476	1	9.25166e-11	-0.637369	0.039	0.355	1.77391e-06	0.00273057	1.85033e-10
Ndufa12	0.00245872	-0.493968	1	0.893	1	9.9083e-11	-0.393563	0.922	0.95	1.89982e-06	0.00245872	1.98166e-10
Atp6v1a	0.0777389	-0.495531	0.812	0.783	1	1.06786e-10	-0.495713	0.824	0.879	2.04751e-06	0.0777389	2.13571e-10
Ndufb6	0.00419707	-0.536167	1	0.856	1	1.17055e-10	-0.450085	0.902	0.916	2.24442e-06	0.00419707	2.3411e-10
Enah	0.000140265	0.344014	0.938	0.636	1	1.295e-10	0.33397	0.755	0.574	2.48303e-06	0.000140265	2.59e-10
Ndufc1	3.757e-06	-0.811911	0.875	0.925	0.0720367	1.80887e-10	-0.452958	0.951	0.959	3.46833e-06	3.757e-06	3.61775e-10
Abat	0.0269917	-0.311598	0.25	0.463	1	1.86224e-10	-0.324628	0.078	0.412	3.57067e-06	0.0269917	3.72449e-10
Ass1	0.000607549	-1.66638	0.188	0.57	1	1.86669e-10	-1.38602	0.088	0.397	3.57919e-06	0.000607549	3.73338e-10
Msi2	0.000307117	0.269467	0.938	0.634	1	1.96114e-10	0.324626	0.922	0.762	3.76029e-06	0.000307117	3.92228e-10
mt-Cytb	0.0243081	-0.504104	1	0.987	1	2.06414e-10	-0.451235	1	0.989	3.95778e-06	0.0243081	4.12828e-10
Gcnt1	0.170316	-0.534204	0.438	0.487	1	2.11852e-10	-0.514704	0.137	0.451	4.06205e-06	0.170316	4.23704e-10
Cyp2j5	0.0101945	-0.670107	0	0.305	1	2.12355e-10	-0.934606	0.029	0.332	4.0717e-06	0.0101945	4.2471e-10
Slc25a10	0.0197745	-0.458333	0.312	0.54	1	2.14763e-10	-0.426562	0.157	0.467	4.11787e-06	0.0197745	4.29527e-10
Hoxb2	0.00136535	0.259637	0.812	0.471	1	2.15561e-10	0.34009	0.833	0.625	4.13316e-06	0.00136535	4.31121e-10
Dock1	0.000142668	0.292925	0.75	0.356	1	2.20673e-10	0.313302	0.618	0.386	4.23119e-06	0.000142668	4.41346e-10
Tmem252	0.0310741	-0.396212	0.188	0.406	1	2.30171e-10	-0.593905	0.078	0.395	4.41329e-06	0.0310741	4.60341e-10
Tshz2	0.000901517	0.266222	0.875	0.455	1	2.30258e-10	0.542778	0.598	0.358	4.41496e-06	0.000901517	4.60515e-10
Qdpr	0.00159045	-0.777714	0.875	0.794	1	2.40286e-10	-0.624751	0.657	0.801	4.60725e-06	0.00159045	4.80573e-10
Fabp3	0.221267	-0.730125	0.812	0.722	1	2.4151e-10	-1.07771	0.373	0.626	4.63071e-06	0.221267	4.83019e-10
Aldh6a1	0.0188622	-0.591289	0.375	0.548	1	2.58147e-10	-0.54908	0.412	0.645	4.94971e-06	0.0188622	5.16294e-10
Ppt2	0.0823797	-0.350224	0.562	0.61	1	2.5899e-10	-0.378868	0.343	0.655	4.96587e-06	0.0823797	5.1798e-10
Smim24	0.340063	-0.285203	0.438	0.465	1	2.65994e-10	-0.447112	0.147	0.462	5.10018e-06	0.340063	5.31989e-10
Timm8a1	0.00659968	-0.432373	0.5	0.693	1	2.92007e-10	-0.400804	0.451	0.701	5.59895e-06	0.00659968	5.84014e-10
Bphl	0.0658708	-0.472931	0.75	0.722	1	3.31404e-10	-0.525272	0.618	0.809	6.35435e-06	0.0658708	6.62809e-10
Ier2	0.000232024	0.897875	0.875	0.58	1	3.31886e-10	0.529453	0.882	0.747	6.36358e-06	0.000232024	6.63772e-10
Fh1	0.0311051	-0.413739	0.75	0.81	1	3.48432e-10	-0.399044	0.627	0.82	6.68084e-06	0.0311051	6.96864e-10
Ndufv1	0.00283823	-0.501484	0.938	0.853	1	3.88713e-10	-0.434504	0.775	0.886	7.45319e-06	0.00283823	7.77427e-10
Phyh	0.00880965	-0.418136	0.375	0.639	1	3.99024e-10	-0.470193	0.431	0.713	7.65089e-06	0.00880965	7.98049e-10
Cgn	3.46823e-07	0.328871	0.812	0.27	0.00664999	4.05452e-10	0.290889	0.529	0.302	7.77414e-06	3.46823e-07	8.10904e-10
Dnajc19	0.00652477	-0.568098	0.812	0.802	1	4.23614e-10	-0.538009	0.667	0.799	8.12238e-06	0.00652477	8.47228e-10
Eps8	0.671376	-0.270766	0.75	0.578	1	4.35562e-10	-0.373207	0.304	0.632	8.35147e-06	0.671376	8.71125e-10
Gsto1	0.0366269	-0.314898	0.438	0.588	1	4.60212e-10	-0.274362	0.186	0.51	8.8241e-06	0.0366269	9.20424e-10
Clic1	0.0184496	0.27002	1	0.869	1	4.73013e-10	0.310766	0.98	0.94	9.06955e-06	0.0184496	9.46026e-10
Sfxn1	0.135041	-0.443423	0.938	0.775	1	6.0942e-10	-0.517924	0.804	0.867	1.1685e-05	0.135041	1.21884e-09
Bex3	0.000464125	0.337148	1	0.832	1	6.14876e-10	0.33823	1	0.912	1.17896e-05	0.000464125	1.22975e-09
Zfp91	0.00120678	0.363602	1	0.816	1	6.41152e-10	0.300287	0.98	0.899	1.22934e-05	0.00120678	1.2823e-09
Hoxb8	4.84655e-05	0.473289	0.812	0.489	0.929277	7.08405e-10	0.256555	0.814	0.578	1.3583e-05	4.84655e-05	1.41681e-09
Fdx1	0.160157	-0.349415	1	0.762	1	7.48718e-10	-0.476592	0.588	0.824	1.43559e-05	0.160157	1.49744e-09
Neu1	0.549006	-0.273831	0.812	0.591	1	7.52074e-10	-0.553395	0.618	0.768	1.44203e-05	0.549006	1.50415e-09
Slc22a2	0.0257627	-0.692356	0.125	0.361	1	7.60888e-10	-0.729521	0.039	0.332	1.45893e-05	0.0257627	1.52178e-09
Gpx8	0.000279919	0.310594	0.875	0.452	1	7.70488e-10	0.27079	0.608	0.366	1.47733e-05	0.000279919	1.54098e-09
Susd2	0.00436316	-0.353788	0	0.356	1	8.29566e-10	-0.300547	0.039	0.337	1.59061e-05	0.00436316	1.65913e-09
Uqcrb	0.000219713	-0.658592	0.938	0.941	1	8.29796e-10	-0.442764	0.99	0.976	1.59105e-05	0.000219713	1.65959e-09
Col18a1	0.00117336	0.379976	1	0.73	1	8.52338e-10	0.323053	0.863	0.722	1.63427e-05	0.00117336	1.70468e-09
2010107E04Rik	0.00154077	-0.485552	1	0.914	1	8.7291e-10	-0.401376	0.961	0.958	1.67372e-05	0.00154077	1.74582e-09
Slc27a2	0.00109493	-0.690576	0	0.43	1	8.7959e-10	-0.840477	0.137	0.446	1.68653e-05	0.00109493	1.75918e-09
Col4a1	0.00108067	0.375016	1	0.858	1	9.10864e-10	0.365631	0.99	0.91	1.74649e-05	0.00108067	1.82173e-09
Calr	0.0309779	-0.314418	1	0.936	1	9.31695e-10	-0.377973	0.971	0.966	1.78643e-05	0.0309779	1.86339e-09
Hspb11	0.000156862	0.274377	0.875	0.398	1	1.00579e-09	0.275085	0.657	0.439	1.9285e-05	0.000156862	2.01158e-09
Ndufb11	0.00173699	-0.412182	1	0.912	1	1.01279e-09	-0.309831	0.98	0.967	1.94193e-05	0.00173699	2.02559e-09
Ndufb8	0.0605897	-0.362731	1	0.939	1	1.04233e-09	-0.477916	0.971	0.975	1.99857e-05	0.0605897	2.08467e-09
Adhfe1	0.00379214	-0.282207	0	0.364	1	1.19274e-09	-0.296415	0.01	0.294	2.28697e-05	0.00379214	2.38549e-09
Ndufb7	0.0101638	-0.444531	1	0.906	1	1.28124e-09	-0.365099	0.922	0.957	2.45665e-05	0.0101638	2.56248e-09
Slc47a1	0.0215633	-0.551455	0.25	0.455	1	1.31558e-09	-0.415282	0.088	0.388	2.5225e-05	0.0215633	2.63117e-09
Kif13b	0.00107043	0.320008	0.75	0.414	1	1.34517e-09	0.321569	0.598	0.395	2.57922e-05	0.00107043	2.69033e-09
Prodh2	0.00501128	-0.602073	0	0.348	1	1.39338e-09	-0.571078	0.039	0.321	2.67167e-05	0.00501128	2.78677e-09
Slc19a1	0.0428657	-0.391576	0.375	0.503	1	1.44314e-09	-0.396043	0.255	0.55	2.76707e-05	0.0428657	2.88627e-09
Hoxb7	0.00197027	0.319197	0.75	0.548	1	1.60538e-09	0.336995	0.814	0.65	3.07816e-05	0.00197027	3.21076e-09
Gm16010	0.0270058	-0.370478	0.062	0.31	1	1.60983e-09	-0.298192	0	0.276	3.08668e-05	0.0270058	3.21965e-09
Etfa	0.0040824	-0.591306	0.875	0.84	1	1.65012e-09	-0.384977	0.745	0.878	3.16394e-05	0.0040824	3.30024e-09
Smim1	0.137967	-0.376249	0.562	0.591	1	1.66436e-09	-0.480446	0.441	0.692	3.19124e-05	0.137967	3.32871e-09
Kcnk1	1.8735e-06	0.272237	0.812	0.251	0.0359225	1.73272e-09	0.256251	0.461	0.201	3.32232e-05	1.8735e-06	3.46544e-09
Eif5a	0.0569181	-0.272496	1	0.917	1	1.74804e-09	-0.320797	1	0.977	3.35168e-05	0.0569181	3.49607e-09
Chd3	0.0214166	0.253757	0.938	0.714	1	1.95682e-09	0.305342	0.882	0.715	3.75201e-05	0.0214166	3.91364e-09
Atp6v1e1	0.00908639	-0.602602	0.875	0.864	1	1.9662e-09	-0.481853	0.814	0.921	3.76999e-05	0.00908639	3.9324e-09
Lhfpl2	3.7676e-05	0.302334	0.75	0.361	0.722399	1.9664e-09	0.30648	0.539	0.321	3.77038e-05	3.7676e-05	3.9328e-09
Ndrg1	0.00222181	-1.01789	0.188	0.529	1	1.96663e-09	-0.981284	0.225	0.508	3.77082e-05	0.00222181	3.93327e-09
Ndufb9	5.81799e-05	-0.588217	1	0.947	1	2.00049e-09	-0.394699	1	0.977	3.83575e-05	5.81799e-05	4.00099e-09
Hspa9	0.00727319	-0.451691	0.875	0.896	1	2.07122e-09	-0.355081	0.912	0.96	3.97135e-05	0.00727319	4.14243e-09
Pck1	0.0962841	-0.401559	0.125	0.294	1	2.19852e-09	-0.801415	0.069	0.357	4.21544e-05	0.0962841	4.39704e-09
Actr3	0.00062642	0.384971	1	0.749	1	2.38695e-09	0.377398	0.941	0.83	4.57674e-05	0.00062642	4.77391e-09
Clrn3	0.0316791	-0.404526	0.188	0.406	1	2.43725e-09	-0.300029	0.059	0.365	4.67319e-05	0.0316791	4.8745e-09
Cox4i1	0.000353545	-0.425412	1	0.987	1	2.44489e-09	-0.301331	1	0.997	4.68783e-05	0.000353545	4.88978e-09
Hoga1	0.120192	-0.433764	0.562	0.553	1	2.68771e-09	-0.555858	0.441	0.662	5.15342e-05	0.120192	5.37542e-09
Kdm1a	3.23837e-05	0.390223	0.938	0.596	0.620926	2.73036e-09	0.290264	0.843	0.682	5.23519e-05	3.23837e-05	5.46071e-09
Cbx1	0.00274072	0.316402	1	0.816	1	2.82766e-09	0.260252	0.98	0.864	5.42175e-05	0.00274072	5.65532e-09
Snx7	0.0123561	-0.442316	0.312	0.548	1	2.87782e-09	-0.36588	0.225	0.531	5.51794e-05	0.0123561	5.75565e-09
Slc22a19	0.0054907	-0.531128	0	0.342	1	2.96292e-09	-0.627411	0.01	0.281	5.6811e-05	0.0054907	5.92583e-09
Aif1l	0.37211	-0.403642	0.625	0.612	1	3.09714e-09	-0.362917	0.206	0.528	5.93847e-05	0.37211	6.19429e-09
As3mt	0.118163	-0.300276	0.625	0.647	1	3.22607e-09	-0.352901	0.333	0.609	6.18567e-05	0.118163	6.45215e-09
Aadac	0.00345016	-0.370864	0	0.369	1	3.53899e-09	-0.278931	0.01	0.283	6.78567e-05	0.00345016	7.07799e-09
Dhcr24	0.0447832	-0.412148	0.5	0.583	1	3.80439e-09	-0.250072	0.039	0.32	7.29454e-05	0.0447832	7.60879e-09
Acsm2	0.000948775	-1.04931	0.062	0.481	1	4.02051e-09	-0.967482	0.029	0.302	7.70892e-05	0.000948775	8.04102e-09
mt-Atp6	0.0150517	-0.558471	1	0.997	1	4.04171e-09	-0.414462	1	1	7.74957e-05	0.0150517	8.08341e-09
Pdzk1ip1	0.0938557	-0.83778	0.75	0.706	1	4.24558e-09	-0.890432	0.471	0.689	8.14048e-05	0.0938557	8.49116e-09
Slc51b	0.0352227	-0.342655	0.062	0.291	1	4.3441e-09	-0.347297	0.01	0.277	8.32937e-05	0.0352227	8.68819e-09
Acadvl	0.00755573	-0.553569	0.625	0.717	1	4.44368e-09	-0.384211	0.637	0.799	8.52031e-05	0.00755573	8.88736e-09
Gatm	0.00924222	-1.231	0.125	0.433	1	4.58822e-09	-1.10343	0.029	0.301	8.79746e-05	0.00924222	9.17645e-09
Larp1b	0.0272907	-0.447624	0.5	0.687	1	4.5957e-09	-0.400791	0.539	0.725	8.8118e-05	0.0272907	9.19141e-09
Slc22a1	0.00368113	-0.726848	0.062	0.417	1	4.66189e-09	-0.487091	0.01	0.276	8.9387e-05	0.00368113	9.32377e-09
Sdhd	0.0325123	-0.44485	0.812	0.837	1	4.72565e-09	-0.420713	0.735	0.875	9.06095e-05	0.0325123	9.45129e-09
Kdm5b	0.00114763	0.322467	0.938	0.607	1	5.21288e-09	0.315742	0.804	0.673	9.99517e-05	0.00114763	1.04258e-08
mt-Nd2	0.00167658	-0.677572	1	0.987	1	5.79481e-09	-0.422489	1	0.996	0.00011111	0.00167658	1.15896e-08
Qk	0.00274518	0.334188	0.875	0.631	1	6.77274e-09	0.318776	0.843	0.712	0.00012986	0.00274518	1.35455e-08
Phf6	0.000159223	0.250975	0.75	0.321	1	7.15464e-09	0.283327	0.461	0.249	0.000137183	0.000159223	1.43093e-08
Zfp36l2	3.83071e-05	0.418717	0.875	0.428	0.734501	7.1627e-09	0.419256	0.667	0.484	0.000137338	3.83071e-05	1.43254e-08
Cdh6	0.000533382	0.497564	0.875	0.618	1	7.30957e-09	0.457411	0.843	0.683	0.000140154	0.000533382	1.46191e-08
Myof	1.98208e-07	0.621896	0.938	0.409	0.00380045	7.31516e-09	0.409439	0.696	0.535	0.000140261	1.98208e-07	1.46303e-08
Mfsd4b1	0.0242601	-0.31402	0.062	0.329	1	7.53412e-09	-0.26916	0.02	0.285	0.000144459	0.0242601	1.50682e-08
Pnrc1	0.00490197	0.33617	1	0.701	1	7.69404e-09	0.338592	0.931	0.84	0.000147525	0.00490197	1.53881e-08
2610528J11Rik	0.0242399	-0.444518	0.375	0.551	1	7.951e-09	-0.338706	0.206	0.489	0.000152452	0.0242399	1.5902e-08
Wwc1	0.001329	0.36951	0.875	0.575	1	8.04577e-09	0.473942	0.706	0.58	0.00015427	0.001329	1.60915e-08
Atrx	0.00027996	0.38337	1	0.738	1	8.23146e-09	0.299131	0.912	0.811	0.00015783	0.00027996	1.64629e-08
Cyp2d26	0.00319896	-1.10824	0.062	0.428	1	8.41224e-09	-0.759645	0.02	0.282	0.000161296	0.00319896	1.68245e-08
Apom	0.0551477	-0.428737	0.125	0.329	1	9.35975e-09	-0.418914	0.02	0.283	0.000179464	0.0551477	1.87195e-08
Ccnl1	0.00123122	0.269981	0.938	0.612	1	1.00949e-08	0.269423	0.804	0.625	0.000193559	0.00123122	2.01898e-08
Gpr137b	0.00583589	-0.395454	0.062	0.393	1	1.07418e-08	-0.294304	0.078	0.36	0.000205963	0.00583589	2.14835e-08
Krt19	1.15958e-08	0.910547	0.688	0.174	0.000222337	0.0347722	0.318836	0.206	0.139	1	0.0347722	2.31916e-08
Ndufs1	0.00608776	-0.532501	0.688	0.77	1	1.16284e-08	-0.410037	0.529	0.776	0.000222964	0.00608776	2.32569e-08
Tcf4	5.12461e-05	0.433923	0.875	0.508	0.982592	1.16409e-08	0.270165	0.706	0.487	0.000223203	5.12461e-05	2.32818e-08
Acsm1	0.107607	-0.275485	0.062	0.219	1	1.19179e-08	-0.468595	0	0.252	0.000228513	0.107607	2.38357e-08
Acat1	3.87409e-06	-0.948322	0.562	0.834	0.0742819	1.19368e-08	-0.437697	0.765	0.852	0.000228876	3.87409e-06	2.38735e-08
Chchd10	4.64825e-05	-1.04011	0.938	0.928	0.891255	1.21838e-08	-0.706133	0.882	0.941	0.000233612	4.64825e-05	2.43675e-08
Bptf	1.9934e-05	0.45413	1	0.698	0.382215	1.22191e-08	0.317967	0.882	0.741	0.000234289	1.9934e-05	2.44382e-08
Kcnj15	0.00895502	-0.388746	0	0.313	1	1.29784e-08	-0.276884	0	0.251	0.000248847	0.00895502	2.59567e-08
Hoxa7	1.19809e-06	0.491377	0.938	0.54	0.0229722	1.35888e-08	0.281262	0.745	0.598	0.000260551	1.19809e-06	2.71775e-08
Ush1c	0.00623541	-0.390242	0.125	0.471	1	1.409e-08	-0.288724	0.029	0.295	0.000270162	0.00623541	2.818e-08
Nbeal1	0.000299396	0.270711	0.875	0.484	1	1.46784e-08	0.25645	0.667	0.491	0.000281443	0.000299396	2.93567e-08
Rsf1	3.3183e-05	0.402288	0.875	0.596	0.636251	1.51966e-08	0.287065	0.824	0.684	0.00029138	3.3183e-05	3.03932e-08
Gapdh	0.023324	-0.279011	1	0.979	1	1.54345e-08	-0.368726	1	0.995	0.000295941	0.023324	3.0869e-08
Gpm6a	0.123941	-0.286417	0.25	0.358	1	1.54552e-08	-0.271134	0.049	0.321	0.000296338	0.123941	3.09104e-08
Slc3a1	0.0237589	-0.649896	0.125	0.374	1	1.57994e-08	-0.561713	0.059	0.326	0.000302937	0.0237589	3.15987e-08
Steap2	0.177832	-0.315893	0.562	0.543	1	1.60241e-08	-0.328096	0.294	0.588	0.000307247	0.177832	3.20483e-08
Slc15a2	0.567825	-0.280381	0.5	0.476	1	1.62075e-08	-0.3164	0.088	0.369	0.000310763	0.567825	3.24151e-08
Mbnl2	1.71441e-05	0.449208	1	0.658	0.328721	1.96576e-08	0.301798	0.873	0.756	0.000376915	1.71441e-05	3.93152e-08
Slc17a1	0.0234634	-0.485429	0.062	0.326	1	1.98322e-08	-0.53132	0	0.246	0.000380263	0.0234634	3.96645e-08
Cab39l	0.000124921	0.49483	0.75	0.369	1	1.98583e-08	0.25089	0.52	0.313	0.000380763	0.000124921	3.97166e-08
Lama1	0.0191415	0.287942	0.688	0.561	1	1.99629e-08	0.379989	0.794	0.633	0.000382769	0.0191415	3.99258e-08
Pdha1	0.51329	-0.250918	0.875	0.749	1	2.01427e-08	-0.362638	0.559	0.765	0.000386215	0.51329	4.02853e-08
Aco2	0.000782227	-0.695067	0.812	0.885	1	2.16404e-08	-0.498296	0.892	0.94	0.000414932	0.000782227	4.32807e-08
Acot13	0.00302851	-0.743354	0.75	0.797	1	2.25843e-08	-0.559086	0.676	0.833	0.000433032	0.00302851	4.51686e-08
Pnisr	0.00447289	0.253309	1	0.77	1	2.2859e-08	0.269431	0.961	0.815	0.000438298	0.00447289	4.5718e-08
Fosb	5.37974e-05	0.531816	0.625	0.222	1	2.29224e-08	0.41799	0.569	0.345	0.000439514	5.37974e-05	4.58448e-08
Msra	0.0969905	-0.340994	0.375	0.505	1	2.30403e-08	-0.377952	0.157	0.426	0.000441775	0.0969905	4.60807e-08
Tcaf1	6.53088e-05	0.384925	0.938	0.495	1	2.3316e-08	0.314381	0.608	0.43	0.00044706	6.53088e-05	4.66319e-08
Hmgcs1	0.0720897	-0.641131	1	0.832	1	2.35322e-08	-0.6582	0.716	0.847	0.000451207	0.0720897	4.70644e-08
Uqcrc2	0.0213794	-0.3921	1	0.888	1	2.39916e-08	-0.35369	0.951	0.962	0.000460014	0.0213794	4.79831e-08
Fhl1	0.00969114	-0.391295	0.312	0.535	1	2.42606e-08	-0.341341	0.186	0.478	0.000465172	0.00969114	4.85212e-08
Grhpr	0.0277901	-0.632684	0.875	0.794	1	2.48649e-08	-0.463918	0.765	0.889	0.00047676	0.0277901	4.97298e-08
Ccdc34	0.000286241	0.44916	0.938	0.658	1	2.49164e-08	0.309396	0.863	0.755	0.000477747	0.000286241	4.98328e-08
Dcxr	0.178867	-0.483733	0.625	0.594	1	2.66138e-08	-0.496439	0.333	0.59	0.000510293	0.178867	5.32276e-08
Slc5a8	0.049273	-0.467089	0.062	0.27	1	2.7504e-08	-0.599504	0.098	0.363	0.000527361	0.049273	5.50079e-08
Nmt2	5.43171e-05	0.266824	0.938	0.422	1	2.76811e-08	0.26931	0.618	0.394	0.000530757	5.43171e-05	5.53622e-08
Cib1	0.329669	-0.276375	1	0.751	1	2.80041e-08	-0.396562	0.618	0.798	0.00053695	0.329669	5.60081e-08
Magi3	6.8599e-06	0.337314	0.688	0.243	0.131532	3.56045e-08	0.289653	0.422	0.223	0.00068268	6.8599e-06	7.12089e-08
Csad	0.0497349	-0.671997	0.688	0.671	1	3.62415e-08	-0.654057	0.382	0.621	0.000694894	0.0497349	7.24829e-08
Hoxb4	0.00245115	0.466383	0.688	0.516	1	3.63128e-08	0.306381	0.804	0.645	0.000696262	0.00245115	7.26257e-08
Glyat	0.0168988	-0.414084	0.125	0.449	1	3.65765e-08	-0.360005	0.078	0.35	0.000701317	0.0168988	7.3153e-08
Gpx1	0.132593	-0.3028	0.938	0.848	1	3.80081e-08	-0.395731	0.912	0.934	0.000728767	0.132593	7.60162e-08
Slc6a18	0.0135759	-0.635576	0.125	0.396	1	3.95133e-08	-0.593601	0.235	0.497	0.000757628	0.0135759	7.90266e-08
Car4	0.00442115	-0.580131	0.312	0.612	1	4.845e-08	-0.428664	0.275	0.546	0.00092898	0.00442115	9.69e-08
Pgm2	0.165829	-0.298158	0.625	0.61	1	5.34759e-08	-0.309649	0.363	0.647	0.00102535	0.165829	1.06952e-07
Enpp2	0.0798227	-0.469814	0.562	0.626	1	5.40313e-08	-0.428725	0.363	0.614	0.001036	0.0798227	1.08063e-07
Creb3l1	0.0418223	-0.280048	0.188	0.385	1	5.46903e-08	-0.260358	0.157	0.433	0.00104863	0.0418223	1.09381e-07
Slc7a13	0.00628821	-0.599323	0	0.334	1	6.13829e-08	-0.334095	0.02	0.266	0.00117696	0.00628821	1.22766e-07
Rcn2	0.000310719	0.335722	0.812	0.455	1	6.1455e-08	0.262734	0.696	0.497	0.00117834	0.000310719	1.2291e-07
Cdhr5	0.00679534	-0.401819	0.062	0.385	1	6.42517e-08	-0.261647	0.02	0.259	0.00123196	0.00679534	1.28503e-07
Sdhc	0.0246868	-0.397334	0.812	0.821	1	6.80359e-08	-0.352488	0.686	0.827	0.00130452	0.0246868	1.36072e-07
Tfcp2l1	0.94491	-0.295427	0.75	0.591	1	7.01316e-08	-0.425281	0.314	0.593	0.0013447	0.94491	1.40263e-07
Ndufb2	0.0793441	-0.322511	0.812	0.797	1	7.40756e-08	-0.322834	0.775	0.879	0.00142033	0.0793441	1.48151e-07
Mettl7b	0.0201708	-0.413023	0.062	0.334	1	7.51903e-08	-0.374389	0	0.229	0.0014417	0.0201708	1.50381e-07
Arid1a	0.00022627	0.303707	0.938	0.644	1	7.65142e-08	0.253023	0.814	0.654	0.00146708	0.00022627	1.53028e-07
Fbp2	0.0179729	-0.61838	0.125	0.39	1	7.80108e-08	-0.313168	0.029	0.275	0.00149578	0.0179729	1.56022e-07
Stard10	0.0621875	-0.397044	0.875	0.829	1	8.55627e-08	-0.388505	0.814	0.888	0.00164058	0.0621875	1.71125e-07
Tpcn1	0.162363	-0.354974	0.438	0.492	1	8.69664e-08	-0.269879	0.245	0.52	0.00166749	0.162363	1.73933e-07
Gpx3	0.552774	-1.30199	0.562	0.516	1	8.75399e-08	-1.32323	0.127	0.387	0.00167849	0.552774	1.7508e-07
Purb	0.0025051	0.292892	1	0.759	1	8.77278e-08	0.309864	0.922	0.824	0.00168209	0.0025051	1.75456e-07
Ndufa6	0.0367729	-0.355721	0.938	0.939	1	8.88529e-08	-0.345876	1	0.963	0.00170367	0.0367729	1.77706e-07
Car12	0.0162585	-0.686684	0.188	0.452	1	9.33625e-08	-0.445847	0.078	0.334	0.00179013	0.0162585	1.86725e-07
Idh3a	0.195098	-0.385943	0.938	0.722	1	9.37166e-08	-0.415302	0.49	0.714	0.00179692	0.195098	1.87433e-07
Galnt11	0.0319618	-0.702909	0.562	0.682	1	9.4617e-08	-0.721764	0.52	0.681	0.00181419	0.0319618	1.89234e-07
Ndufs2	0.00414515	-0.494266	1	0.909	1	9.77209e-08	-0.322238	0.971	0.958	0.0018737	0.00414515	1.95442e-07
Hspa5	0.0493843	-0.321778	1	0.909	1	9.8555e-08	-0.396964	0.941	0.943	0.00188969	0.0493843	1.9711e-07
Itga6	0.0403472	-0.42053	0.625	0.717	1	1.00413e-07	-0.439791	0.569	0.736	0.00192532	0.0403472	2.00827e-07
Got2	0.00171781	-0.640051	0.812	0.832	1	1.03525e-07	-0.416854	0.716	0.862	0.00198498	0.00171781	2.0705e-07
Irf2bp1	0.00260147	0.252456	0.75	0.495	1	1.1042e-07	0.267405	0.725	0.585	0.0021172	0.00260147	2.20841e-07
S100a16	0.000941701	0.299347	0.938	0.626	1	1.11517e-07	0.309676	0.824	0.676	0.00213823	0.000941701	2.23034e-07
Fmo2	0.0503612	-0.408289	0.062	0.281	1	1.32014e-07	-0.426045	0.01	0.236	0.00253123	0.0503612	2.64027e-07
Cldn3	1.43563e-07	0.304831	0.75	0.19	0.00275268	3.23383e-06	0.475847	0.373	0.189	0.0620054	3.23383e-06	2.87126e-07
Sigirr	0.113508	-0.401063	0.438	0.489	1	1.65644e-07	-0.290443	0.275	0.543	0.00317605	0.113508	3.31288e-07
Prss23	3.99472e-05	0.459667	0.812	0.369	0.765948	1.82104e-07	0.367091	0.51	0.296	0.00349165	3.99472e-05	3.64207e-07
Mrps36	0.150834	-0.290294	1	0.783	1	1.95703e-07	-0.370437	0.716	0.811	0.00375241	0.150834	3.91406e-07
Taldo1	0.0666786	-0.307486	0.938	0.874	1	2.02374e-07	-0.315168	0.882	0.941	0.00388031	0.0666786	4.04747e-07
Nus1	0.801244	-0.278199	0.75	0.634	1	2.02378e-07	-0.484069	0.431	0.669	0.00388039	0.801244	4.04755e-07
Mep1b	0.0131509	-0.664671	0	0.289	1	2.33803e-07	-0.656025	0.01	0.228	0.00448295	0.0131509	4.67607e-07
Aldh4a1	0.470326	-0.360782	0.562	0.521	1	2.33897e-07	-0.366564	0.235	0.491	0.00448474	0.470326	4.67794e-07
Bdh1	0.643737	-0.288003	0.312	0.302	1	2.39971e-07	-0.29414	0.176	0.424	0.00460121	0.643737	4.79942e-07
Sod2	0.00242109	-0.661708	0.875	0.896	1	2.64539e-07	-0.356338	0.961	0.935	0.00507227	0.00242109	5.29078e-07
Rnf181	0.024165	-0.371561	0.312	0.553	1	2.75458e-07	-0.339686	0.235	0.49	0.00528163	0.024165	5.50915e-07
Tsc22d1	0.000207185	0.585603	1	0.813	1	2.75529e-07	0.351785	0.912	0.832	0.00528299	0.000207185	5.51058e-07
Ndufa11	0.013737	-0.37651	0.938	0.898	1	2.881e-07	-0.337904	0.882	0.922	0.00552402	0.013737	5.76199e-07
Acox1	0.0875552	-0.389642	0.5	0.553	1	2.91496e-07	-0.381567	0.314	0.578	0.00558914	0.0875552	5.82991e-07
mt-Nd4	0.0277972	-0.526372	1	0.987	1	2.97634e-07	-0.356577	1	0.988	0.00570684	0.0277972	5.95269e-07
Asb9	0.011075	-0.427258	0.188	0.457	1	2.98722e-07	-0.2674	0.078	0.316	0.0057277	0.011075	5.97444e-07
Tufm	0.141613	-0.283166	0.625	0.684	1	3.0656e-07	-0.251259	0.402	0.653	0.00587798	0.141613	6.1312e-07
Fth1	0.0110183	-0.451153	1	0.976	1	3.17384e-07	-0.543531	1	0.994	0.00608552	0.0110183	6.34768e-07
H1f0	0.000875339	0.58974	0.938	0.735	1	3.23313e-07	0.303198	0.931	0.795	0.0061992	0.000875339	6.46626e-07
Irx5	3.48383e-07	0.418917	0.562	0.126	0.0066799	1.4953e-05	0.428223	0.422	0.281	0.286708	1.4953e-05	6.96766e-07
Mboat2	6.09112e-07	0.4531	0.938	0.361	0.0116791	3.55545e-07	0.292415	0.471	0.293	0.00681721	6.09112e-07	7.11089e-07
Glrx5	0.0413716	-0.320286	1	0.856	1	3.68232e-07	-0.32832	0.706	0.845	0.00706048	0.0413716	7.36464e-07
Bzw1	0.0201072	0.266341	1	0.816	1	3.89305e-07	0.25459	0.971	0.869	0.00746454	0.0201072	7.7861e-07
Id2	0.12247	0.284262	0.875	0.759	1	3.89686e-07	0.470604	0.882	0.807	0.00747184	0.12247	7.79372e-07
Smchd1	4.11088e-07	0.894592	1	0.623	0.0078822	2.31902e-06	0.380913	0.775	0.657	0.0444649	2.31902e-06	8.22176e-07
Sparc	0.00151181	0.578878	0.938	0.666	1	4.163e-07	0.375741	0.716	0.596	0.00798213	0.00151181	8.32599e-07
Glud1	0.335062	-0.355965	1	0.906	1	4.69618e-07	0.291346	0.99	0.971	0.00900445	0.335062	9.39236e-07
Gpx4	0.00898941	-0.446661	1	0.949	1	4.73775e-07	-0.440108	0.951	0.976	0.00908417	0.00898941	9.47551e-07
Ndufv3	0.0240747	-0.425388	1	0.845	1	5.08709e-07	-0.323295	0.931	0.921	0.00975398	0.0240747	1.01742e-06
Slc22a8	0.0194085	-0.552613	0.125	0.377	1	5.39098e-07	-0.457508	0.02	0.231	0.0103367	0.0194085	1.0782e-06
Tnrc6b	0.00557084	0.272822	0.812	0.572	1	5.86355e-07	0.254063	0.716	0.584	0.0112428	0.00557084	1.17271e-06
Zfp292	1.81011e-06	0.519775	1	0.65	0.034707	6.20415e-07	0.258144	0.853	0.754	0.0118958	1.81011e-06	1.24083e-06
Gigyf2	0.00683609	0.313344	0.938	0.666	1	6.36746e-07	0.350586	0.804	0.701	0.012209	0.00683609	1.27349e-06
Vil1	0.129489	-0.285542	0.312	0.439	1	7.4795e-07	-0.272815	0.049	0.269	0.0143412	0.129489	1.4959e-06
Sostdc1	0.590414	-0.909246	0.812	0.682	1	7.55104e-07	-0.91335	0.569	0.745	0.0144784	0.590414	1.51021e-06
Aadat	0.512284	-0.772385	0.375	0.428	1	7.60962e-07	-1.10899	0.265	0.505	0.0145907	0.512284	1.52192e-06
H3f3b	7.61184e-07	0.625599	1	0.96	0.0145949	5.15011e-06	0.251891	1	0.973	0.0987482	5.15011e-06	1.52237e-06
Cobl	6.57292e-05	0.453002	0.75	0.361	1	7.88481e-07	0.354342	0.51	0.346	0.0151183	6.57292e-05	1.57696e-06
Hes1	8.26031e-06	0.749013	0.875	0.452	0.158383	8.78321e-07	0.371716	0.627	0.422	0.0168409	8.26031e-06	1.75664e-06
Fos	0.000675799	0.953632	0.75	0.417	1	9.00248e-07	0.510607	0.657	0.492	0.0172614	0.000675799	1.80049e-06
Tmem147	0.0712526	-0.340914	0.875	0.826	1	9.42847e-07	-0.335339	0.735	0.856	0.0180782	0.0712526	1.88569e-06
Grina	0.0847617	-0.348575	0.812	0.719	1	1.01185e-06	-0.345465	0.608	0.778	0.0194012	0.0847617	2.0237e-06
Kif12	0.00288465	0.323244	0.938	0.65	1	1.11938e-06	0.252181	0.922	0.802	0.0214629	0.00288465	2.23875e-06
Cmbl	0.0222361	-0.359584	0.062	0.321	1	1.1742e-06	-0.383706	0.049	0.263	0.0225141	0.0222361	2.3484e-06
Gcdh	0.162193	-0.255636	0.5	0.594	1	1.18511e-06	-0.296285	0.343	0.572	0.0227233	0.162193	2.37022e-06
Slc25a39	0.021276	-0.362138	0.812	0.821	1	1.21403e-06	-0.275565	0.794	0.882	0.0232779	0.021276	2.42807e-06
Cldn1	0.0155326	-0.253382	0	0.278	1	1.26582e-06	-0.291204	0.069	0.291	0.0242709	0.0155326	2.53164e-06
Bcam	2.86115e-05	0.974026	1	0.687	0.548596	1.3919e-06	0.346122	0.804	0.622	0.0266882	2.86115e-05	2.78379e-06
Cryl1	0.148222	-0.497169	0.375	0.452	1	1.39864e-06	-0.468796	0.088	0.307	0.0268175	0.148222	2.79727e-06
Ndufb5	0.0185365	-0.315082	1	0.917	1	1.4419e-06	-0.255157	0.99	0.963	0.027647	0.0185365	2.8838e-06
Fras1	0.000221848	0.394404	0.875	0.532	1	1.44488e-06	0.284156	0.608	0.446	0.0277041	0.000221848	2.88976e-06
Slc17a3	0.00976505	-0.398214	0	0.307	1	1.4527e-06	-0.394478	0.01	0.205	0.027854	0.00976505	2.90539e-06
Acadm	0.427001	-0.398788	0.938	0.802	1	1.49087e-06	-0.474038	0.912	0.927	0.028586	0.427001	2.98175e-06
Slc22a12	0.0773535	-0.33769	0.125	0.302	1	1.70986e-06	-0.252717	0.029	0.231	0.0327849	0.0773535	3.41973e-06
Mpc1	0.010374	-0.626597	0.875	0.818	1	1.75038e-06	-0.419931	0.824	0.863	0.0335618	0.010374	3.50076e-06
Jund	0.000146145	0.62854	1	0.853	1	1.88289e-06	0.316707	0.99	0.948	0.0361025	0.000146145	3.76577e-06
Kl	0.0091162	-0.497864	0.062	0.38	1	1.94244e-06	-0.383379	0.108	0.333	0.0372443	0.0091162	3.88487e-06
Chchd3	0.0124406	-0.448754	0.75	0.778	1	2.25813e-06	-0.322312	0.549	0.735	0.0432974	0.0124406	4.51626e-06
Hgd	0.0252138	-0.382487	0	0.246	1	2.27243e-06	-0.329476	0	0.185	0.0435716	0.0252138	4.54486e-06
Dhfr	0.401339	-0.268721	0.562	0.575	1	2.49591e-06	-0.29565	0.235	0.454	0.0478565	0.401339	4.99181e-06
Sema5a	0.000371994	0.387181	0.812	0.476	1	2.51779e-06	0.280524	0.755	0.652	0.0482761	0.000371994	5.03557e-06
Ndufs5	0.00982606	-0.451599	1	0.896	1	2.75958e-06	-0.307135	0.902	0.927	0.0529122	0.00982606	5.51916e-06
Hif1a	0.0155069	0.265399	0.812	0.61	1	2.89661e-06	0.283567	0.676	0.579	0.0555396	0.0155069	5.79322e-06
Ankrd12	0.00364565	0.29339	0.812	0.591	1	3.06709e-06	0.266182	0.794	0.647	0.0588083	0.00364565	6.13416e-06
Apoo	0.0433827	-0.349257	0.625	0.663	1	3.23596e-06	-0.313638	0.363	0.581	0.0620463	0.0433827	6.47191e-06
Mdk	0.0164827	0.407247	0.938	0.69	1	3.33765e-06	0.284921	0.833	0.67	0.063996	0.0164827	6.67528e-06
4833439L19Rik	0.0392032	-0.451103	0.562	0.701	1	3.47113e-06	-0.316793	0.422	0.66	0.0665555	0.0392032	6.94226e-06
Defb19	0.0215054	-0.462057	0	0.257	1	3.58787e-06	-0.404166	0	0.179	0.0687938	0.0215054	7.17572e-06
Elovl7	0.000902426	0.367429	0.875	0.521	1	3.86873e-06	0.255401	0.647	0.464	0.074179	0.000902426	7.73745e-06
Gss	0.300127	-0.448707	0.562	0.548	1	4.21313e-06	-0.524642	0.461	0.637	0.0807826	0.300127	8.42625e-06
Tcn2	0.0409877	-0.892751	0.75	0.719	1	4.23402e-06	-0.657605	0.618	0.752	0.0811832	0.0409877	8.46803e-06
AI314278	0.135319	-0.352896	0.188	0.318	1	4.35623e-06	-0.346384	0.098	0.312	0.0835263	0.135319	8.71243e-06
Kap	0.181611	-0.758924	0	0.102	1	4.53046e-06	-2.41215	0.049	0.244	0.086867	0.181611	9.06089e-06
Dusp1	0.0186253	0.321547	0.5	0.238	1	4.73575e-06	0.281566	0.441	0.26	0.0908032	0.0186253	9.47147e-06
Hint2	0.226716	-0.304456	0.875	0.765	1	4.77223e-06	-0.308747	0.824	0.867	0.0915027	0.226716	9.54444e-06
Smim4	0.00791039	-0.517214	0.562	0.714	1	4.79808e-06	-0.252998	0.431	0.647	0.0919983	0.00791039	9.59613e-06
Mrps17	0.127813	-0.302802	0.812	0.73	1	4.92864e-06	-0.356887	0.794	0.854	0.0945018	0.127813	9.85726e-06
Cited4	0.120287	-0.271518	0.062	0.211	1	5.35074e-06	-0.289779	0.029	0.217	0.102595	0.120287	1.07015e-05
Mt2	0.0268192	-0.844676	0.25	0.452	1	5.54112e-06	-0.551488	0.088	0.292	0.106245	0.0268192	1.10822e-05
Mrpl42	0.000672404	-0.553916	0.875	0.888	1	5.55608e-06	-0.288294	0.843	0.912	0.106532	0.000672404	1.11121e-05
Zmynd8	0.00101949	0.448725	0.812	0.54	1	5.57805e-06	0.251032	0.608	0.455	0.106953	0.00101949	1.11561e-05
Rida	0.0789073	-0.82947	0.875	0.791	1	6.02431e-06	-0.514607	0.902	0.927	0.11551	0.0789073	1.20486e-05
Tnfaip8	0.00789871	0.359043	0.812	0.473	1	6.20602e-06	0.300354	0.676	0.534	0.118994	0.00789871	1.2412e-05
mt-Co2	0.0347024	-0.538496	1	0.987	1	6.29763e-06	-0.339871	1	0.994	0.120751	0.0347024	1.25952e-05
Idh3g	0.0174247	-0.4126	0.812	0.797	1	6.31508e-06	-0.292748	0.686	0.827	0.121085	0.0174247	1.26301e-05
Tead1	6.05743e-05	0.390495	0.938	0.548	1	6.63963e-06	0.261122	0.676	0.583	0.127308	6.05743e-05	1.32792e-05
Kcnj16	0.248595	-0.392538	0.438	0.497	1	6.66788e-06	-0.316379	0.127	0.351	0.12785	0.248595	1.33357e-05
Coq9	0.0121677	-0.401411	0.438	0.62	1	6.8221e-06	-0.27463	0.431	0.653	0.130807	0.0121677	1.36441e-05
Mccc1	0.392907	-0.263582	0.625	0.545	1	7.24157e-06	-0.285572	0.216	0.443	0.13885	0.392907	1.44831e-05
Nit2	0.0284543	-0.451765	0.688	0.676	1	7.25931e-06	-0.280305	0.49	0.7	0.13919	0.0284543	1.45186e-05
Got1	0.53242	-0.268522	0.75	0.642	1	7.60072e-06	-0.317388	0.275	0.493	0.145736	0.53242	1.52014e-05
Zfp644	0.000630539	0.284657	0.938	0.628	1	8.79721e-06	0.257019	0.775	0.663	0.168678	0.000630539	1.75943e-05
Hagh	0.183178	-0.262513	0.688	0.674	1	8.95706e-06	-0.252995	0.51	0.722	0.171743	0.183178	1.7914e-05
Adgra3	0.00478611	0.332283	0.812	0.599	1	9.04894e-06	0.336002	0.716	0.633	0.173504	0.00478611	1.80978e-05
Pax8	1.4144e-05	0.505605	1	0.663	0.271197	9.08189e-06	0.306682	0.814	0.724	0.174136	1.4144e-05	1.81637e-05
Ddt	0.0805999	-0.417492	0.75	0.725	1	1.0359e-05	-0.27031	0.755	0.869	0.198623	0.0805999	2.07179e-05
Scp2	0.0679364	-0.501505	0.875	0.842	1	1.08629e-05	-0.346574	0.902	0.915	0.208284	0.0679364	2.17256e-05
Fmc1	0.0134255	-0.487883	0.688	0.762	1	1.09579e-05	-0.289192	0.676	0.798	0.210108	0.0134255	2.19158e-05
Tomm40	0.0918426	-0.294856	0.875	0.799	1	1.09806e-05	-0.261386	0.765	0.868	0.210543	0.0918426	2.19612e-05
Immt	0.108387	-0.293509	0.875	0.84	1	1.31024e-05	-0.284582	0.892	0.915	0.251226	0.108387	2.62047e-05
Klf6	0.00415879	0.523669	0.688	0.404	1	1.37234e-05	0.476246	0.637	0.494	0.263132	0.00415879	2.74466e-05
Dlst	0.0043924	-0.539021	0.625	0.743	1	1.40637e-05	-0.29762	0.51	0.701	0.269658	0.0043924	2.81273e-05
Prdx3	0.700403	-0.25806	0.75	0.655	1	1.41278e-05	-0.26906	0.49	0.715	0.270886	0.700403	2.82554e-05
Slc7a7	0.0310483	-0.488997	0.062	0.321	1	1.4266e-05	-0.311388	0.01	0.174	0.273537	0.0310483	2.85319e-05
Guca2b	0.0466194	-0.295421	0	0.203	1	1.59393e-05	-0.25038	0	0.158	0.305619	0.0466194	3.18783e-05
Prdx5	0.0911333	-0.722883	0.812	0.893	1	1.68576e-05	-0.579518	0.961	0.938	0.323228	0.0911333	3.3715e-05
Mlec	0.12124	-0.328086	0.875	0.797	1	1.84212e-05	-0.262696	0.667	0.814	0.353208	0.12124	3.68421e-05
Tubb2a	0.427449	-0.336202	0.5	0.529	1	2.00168e-05	-0.3931	0.225	0.423	0.383801	0.427449	4.00331e-05
Aqp1	0.126814	-0.45949	0.188	0.326	1	2.3945e-05	-0.33067	0.069	0.252	0.459122	0.126814	4.78894e-05
Myl12a	0.00103845	0.493753	1	0.77	1	2.43477e-05	0.27232	0.971	0.89	0.466842	0.00103845	4.86947e-05
Mrpl20	0.0185197	-0.398143	1	0.826	1	2.52091e-05	-0.262139	0.804	0.876	0.483359	0.0185197	5.04176e-05
Dera	0.241006	-0.275945	0.75	0.727	1	3.31295e-05	-0.276062	0.588	0.731	0.635225	0.241006	6.62579e-05
Dag1	0.00026314	0.948587	0.875	0.754	1	3.50889e-05	0.34898	0.902	0.802	0.672794	0.00026314	7.01765e-05
Sord	0.0168289	-0.670765	0.312	0.513	1	4.48699e-05	-0.316357	0.235	0.433	0.860335	0.0168289	8.97377e-05
Vcan	0.00133925	0.464694	0.625	0.291	1	4.67685e-05	0.326069	0.392	0.228	0.896739	0.00133925	9.35348e-05
Fut9	0.0508067	-0.91008	0.438	0.524	1	5.02694e-05	-0.408554	0.441	0.612	0.963865	0.0508067	0.000100536
Ugt2b37	0.00313647	-0.884101	0	0.374	1	5.08347e-05	-0.436422	0.01	0.157	0.974705	0.00313647	0.000101667
Npb	0.381124	-0.351209	0.188	0.251	1	5.08575e-05	-0.261157	0	0.141	0.975141	0.381124	0.000101712
Wnt5a	5.45478e-05	0.361837	0.688	0.294	1	0.000123912	0.274625	0.52	0.373	1	0.000123912	0.000109093
Apoe	0.723152	-0.277842	0.75	0.663	1	5.51739e-05	-0.471906	0.343	0.549	1	0.723152	0.000110345
Esd	0.344269	-0.329848	1	0.914	1	6.21608e-05	-0.271529	1	0.978	1	0.344269	0.000124318
Lbp	6.26967e-05	0.361773	0.688	0.275	1	0.0226205	0.396094	0.275	0.195	1	0.0226205	0.000125389
Atp2a2	0.269475	-0.278269	0.812	0.765	1	6.56678e-05	-0.281195	0.696	0.793	1	0.269475	0.000131331
mt-Co3	0.0279584	-0.476787	1	0.997	1	6.99845e-05	-0.261198	1	0.998	1	0.0279584	0.000139964
Lamp2	0.160486	-0.297153	0.938	0.802	1	7.0684e-05	-0.357819	0.824	0.868	1	0.160486	0.000141363
Jun	0.0648055	0.531534	0.812	0.679	1	7.10209e-05	0.477485	0.882	0.842	1	0.0648055	0.000142037
Slc7a12	0.0649944	-0.317181	0	0.179	1	8.17716e-05	-0.365426	0.029	0.184	1	0.0649944	0.000163536
Slc22a13	0.0466194	-0.32242	0	0.203	1	9.77112e-05	-0.411237	0.02	0.162	1	0.0466194	0.000195413
P4hb	0.310214	-0.254195	0.812	0.832	1	0.000112301	-0.253505	0.775	0.86	1	0.310214	0.00022459
S100a6	0.000234801	0.860404	0.562	0.195	1	0.000127728	0.947733	0.373	0.232	1	0.000234801	0.00025544
Txndc17	0.00311942	-0.605863	0.938	0.861	1	0.00012897	-0.317131	0.941	0.936	1	0.00311942	0.000257924
Asl	0.801937	-0.324047	0.812	0.604	1	0.000136892	-0.320937	0.441	0.62	1	0.801937	0.000273766
Litaf	0.0285156	0.30727	0.688	0.406	1	0.000169774	0.255381	0.559	0.452	1	0.0285156	0.000339519
S100g	0.0674475	-2.87542	0.188	0.369	1	0.000171532	-2.05672	0.127	0.297	1	0.0674475	0.000343035
Rbpms	0.00751145	0.331911	0.938	0.727	1	0.000171586	-0.324434	0.569	0.734	1	0.00751145	0.000343142
Rbp1	0.321776	-0.419235	0.5	0.527	1	0.00017624	-0.310973	0.157	0.334	1	0.321776	0.000352449
Clcnkb	0.247976	-0.574811	0.062	0.16	1	0.000240043	-0.403043	0	0.119	1	0.247976	0.000480029
Lactb2	0.0473403	-0.546861	0.438	0.575	1	0.000264144	-0.281035	0.5	0.657	1	0.0473403	0.000528219
Ctsd	0.00220626	-0.643224	0.812	0.856	1	0.00026508	-0.261939	0.775	0.847	1	0.00220626	0.000530089
Sfrp1	0.23151	-0.572099	0.188	0.302	1	0.000271889	-0.31375	0.029	0.167	1	0.23151	0.000543705
Btg2	0.00864318	0.728567	0.688	0.417	1	0.000275504	0.37538	0.676	0.602	1	0.00864318	0.000550933
Sdha	0.0283754	-0.457704	0.875	0.856	1	0.000320937	-0.251987	0.882	0.891	1	0.0283754	0.00064177
Fabp5	0.222192	-0.523699	0.625	0.607	1	0.000337156	-0.321023	0.314	0.496	1	0.222192	0.000674198
Pnkd	0.00956896	-0.458046	0.875	0.813	1	0.000502558	-0.256154	0.716	0.796	1	0.00956896	0.00100486
Cltc	0.170625	-0.320851	0.812	0.783	1	0.000558806	-0.263466	0.686	0.811	1	0.170625	0.0011173
Mpst	0.262692	-0.269837	0.688	0.639	1	0.000576354	-0.291254	0.569	0.7	1	0.262692	0.00115237
Acmsd	0.0698965	-0.460936	0	0.174	1	0.000587806	-0.262373	0	0.105	1	0.0698965	0.00117527
Egr1	0.00747321	0.557017	0.75	0.521	1	0.000802818	0.307218	0.686	0.607	1	0.00747321	0.00160499
Ppp1r1a	0.350861	-0.413301	0.375	0.219	1	0.000999918	-0.462093	0.059	0.186	1	0.350861	0.00199884
Tmem52b	0.0232926	-1.30141	0	0.251	1	0.00115705	-0.70981	0.039	0.156	1	0.0232926	0.00231276
mt-Nd1	0.0279561	-0.563306	1	0.968	1	0.00145272	-0.294937	1	0.991	1	0.0279561	0.00290333
Gpi1	0.0248024	-0.466355	1	0.89	1	0.00178536	-0.263292	0.971	0.944	1	0.0248024	0.00356754
Gm42418	0.00755834	-1.12215	1	1	1	0.00200449	-0.76407	1	1	1	0.00755834	0.00400495
Gk	0.518462	-0.279245	0.625	0.532	1	0.00214163	-0.254769	0.578	0.674	1	0.518462	0.00427867
Pim3	0.105418	-0.422246	0.688	0.674	1	0.00220327	-0.332995	0.569	0.655	1	0.105418	0.00440168
Tubb4b	0.255387	-0.38186	0.938	0.826	1	0.00280141	-0.329957	0.725	0.783	1	0.255387	0.00559498
Osr2	0.02874	-0.662004	0.188	0.42	1	0.00290786	-0.371531	0.314	0.462	1	0.02874	0.00580726
Afp	0.0181852	-0.790049	0.438	0.628	1	0.00301324	-0.280362	0.294	0.436	1	0.0181852	0.0060174
Hist1h1c	0.436325	0.645733	0.375	0.31	1	0.00401251	0.325426	0.588	0.518	1	0.436325	0.00800892
Slc12a1	0.877303	-1.25936	0.188	0.15	1	0.00460044	-1.14475	0.049	0.147	1	0.877303	0.00917972
Ascc1	0.0527783	-0.541355	0.812	0.682	1	0.00475957	-0.257522	0.588	0.7	1	0.0527783	0.00949649
Irx3	0.0048842	0.382037	0.75	0.374	1	0.0482586	0.334993	0.52	0.52	1	0.0482586	0.00974455
Ftl1	0.00510592	-0.624816	1	0.997	1	0.0165994	-0.309425	1	1	1	0.0165994	0.0101858
Tmem213	0.00714644	-0.580162	0.688	0.251	1	0.794485	-0.599195	0.235	0.198	1	0.794485	0.0142418
Sat1	0.0992554	-0.522727	0.625	0.639	1	0.00753666	-0.315175	0.598	0.675	1	0.0992554	0.0150165
Cbr1	0.165509	-0.625676	0.875	0.786	1	0.00835708	-0.324677	0.843	0.909	1	0.165509	0.0166443
Lamtor5	0.267996	-0.344374	0.812	0.794	1	0.0208051	-0.272846	0.814	0.862	1	0.267996	0.0411774
Iah1	0.0220714	0.452947	0.938	0.738	1	0.0303269	-0.256063	0.853	0.835	1	0.0303269	0.0436556
Mal	0.0252314	-0.571546	0.688	0.289	1	0.0979233	-0.553107	0.167	0.219	1	0.0979233	0.0498263
Akr1b3	0.0270764	1.13171	0.75	0.465	1	0.659033	0.583874	0.324	0.351	1	0.659033	0.0534197
Scd2	0.0960297	-0.720768	0.812	0.799	1	0.035506	-0.459638	0.696	0.703	1	0.0960297	0.0697514
Ckb	0.501945	-0.335309	0.25	0.291	1	0.0515626	-0.3145	0.147	0.227	1	0.501945	0.100467
Gabarapl1	0.0551615	-0.489078	0.375	0.529	1	0.119782	-0.313461	0.441	0.505	1	0.119782	0.10728
Spp1	0.126396	-1.41914	0.312	0.46	1	0.179282	0.758206	0.225	0.317	1	0.179282	0.236817
Cdkn1c	0.98169	-0.262104	0.812	0.698	1	0.198685	-0.568581	0.48	0.545	1	0.98169	0.357894
Lars2	0.723138	-0.441694	0.875	0.767	1	0.645727	-0.265036	0.696	0.727	1	0.723138	0.874491

## Sheet: N.tubule.5_IM2.Mut.CTRL.marker
Gene	Mutant_p_val	Mutant_avg_logFC	Mutant_pct.1	Mutant_pct.2	Mutant_p_val_adj	CTRL_p_val	CTRL_avg_logFC	CTRL_pct.1	CTRL_pct.2	CTRL_p_val_adj	max_pval	minimump_p_val
Elavl2	1.2827e-61	1.34104	1	0.024	2.45944e-57	3.11044e-13	0.301432	0.172	0.019	5.96395e-09	3.11044e-13	2.56539e-61
Pcsk1n	1.08151e-49	1.47596	0.7	0.008	2.07369e-45	1.26408e-23	1.27351	0.172	0.007	2.42374e-19	1.26408e-23	2.16302e-49
Cpe	0.0747083	0.333142	0.3	0.173	1	3.46158e-48	1.42724	0.766	0.13	6.63724e-44	0.0747083	6.92317e-48
Cnot6l	0.0678145	-0.364955	0.6	0.681	1	2.6462e-35	1.31484	0.984	0.76	5.07382e-31	0.0678145	5.2924e-35
Rtn1	3.38905e-14	1.79011	0.35	0.022	6.49816e-10	3.78974e-33	0.551836	0.266	0.013	7.26644e-29	3.38905e-14	7.57947e-33
Dlk1	1.14816e-11	1.15077	0.8	0.232	2.20147e-07	6.90946e-32	2.21647	0.484	0.07	1.32482e-27	1.14816e-11	1.38189e-31
Chchd10	2.71749e-12	-2.12921	0.4	0.957	5.21051e-08	5.06449e-30	-1.73959	0.516	0.962	9.71065e-26	2.71749e-12	1.0129e-29
Btg2	0.113112	-0.27362	0.25	0.438	1	3.62649e-28	1.39657	0.984	0.585	6.95344e-24	0.113112	7.25299e-28
Usp29	5.27734e-06	0.266638	0.35	0.073	0.101188	4.91318e-28	0.438091	0.328	0.031	9.42052e-24	5.27734e-06	9.82635e-28
Epcam	1.22593e-05	-1.12818	0.6	0.827	0.23506	1.31757e-26	-1.40683	0.281	0.9	2.52631e-22	1.22593e-05	2.63514e-26
Scg3	3.01718e-26	0.406832	0.3	0	5.78515e-22	5.51496e-26	0.284556	0.125	0.001	1.05744e-21	5.51496e-26	6.03437e-26
Tcf4	0.000505319	0.338179	0.9	0.503	1	2.45744e-25	0.736497	0.922	0.482	4.71189e-21	0.000505319	4.91488e-25
Auts2	0.0170144	0.287223	0.75	0.559	1	3.40953e-25	0.918294	0.938	0.605	6.53743e-21	0.0170144	6.81905e-25
Marcks	0.00414946	0.475183	0.85	0.535	1	4.77031e-25	0.902188	0.953	0.513	9.14659e-21	0.00414946	9.54062e-25
Mtch1	0.0123872	-0.338936	0.85	0.865	1	7.5431e-25	0.974546	0.984	0.909	1.44631e-20	0.0123872	1.50862e-24
Meg3	0.0706484	2.64206	0.4	0.295	1	1.18328e-24	2.5656	0.609	0.163	2.26882e-20	0.0706484	2.36656e-24
Gapdh	6.48339e-07	-0.970249	1	0.978	0.0124313	6.79975e-24	-0.843593	1	0.995	1.30378e-19	6.48339e-07	1.35995e-23
Smagp	3.41624e-06	-0.761341	0.35	0.73	0.065503	8.06936e-23	-0.850404	0.141	0.804	1.54722e-18	3.41624e-06	1.61387e-22
Zdbf2	8.36288e-23	1.14659	0.9	0.135	1.6035e-18	2.41908e-10	0.571602	0.391	0.133	4.63835e-06	2.41908e-10	1.67258e-22
Igfbpl1	8.00299e-16	0.349632	0.25	0.005	1.53449e-11	1.44424e-22	0.895041	0.266	0.025	2.76919e-18	8.00299e-16	2.88849e-22
Nefm	2.7866e-09	1.73719	0.3	0.03	5.34302e-05	1.89107e-22	0.815784	0.297	0.033	3.62594e-18	2.7866e-09	3.78214e-22
mt-Nd1	0.00911294	-0.585573	1	0.968	1	3.3821e-22	-0.851052	1	0.991	6.48484e-18	0.00911294	6.76421e-22
Ldhb	2.5317e-12	-2.41084	0.4	0.962	4.85428e-08	4.89688e-22	-1.97819	0.531	0.909	9.38927e-18	2.5317e-12	9.79376e-22
Sox4	0.191159	0.73631	0.8	0.622	1	6.34694e-22	1.47547	0.922	0.662	1.21696e-17	0.191159	1.26939e-21
Pclo	2.82768e-05	0.389366	0.4	0.105	0.542179	1.21706e-21	0.63687	0.469	0.101	2.33359e-17	2.82768e-05	2.43412e-21
Krt8	1.04467e-08	-1.46044	0.05	0.765	0.000200305	1.79485e-21	-1.24279	0.062	0.734	3.44145e-17	1.04467e-08	3.58971e-21
Atp5g1	9.43246e-10	-1.12683	1	0.976	1.80858e-05	2.21312e-21	-1.03465	0.938	0.991	4.24343e-17	9.43246e-10	4.42624e-21
Mdh1	2.72938e-11	-1.72277	0.95	0.973	5.23331e-07	3.89793e-21	-1.25004	0.938	0.984	7.47389e-17	2.72938e-11	7.79586e-21
Tmbim6	2.14273e-10	-1.52125	0.6	0.908	4.10847e-06	4.01697e-21	-0.830233	0.938	0.966	7.70214e-17	2.14273e-10	8.03394e-21
Cox5a	0.0207473	-0.37286	1	0.954	1	2.44416e-20	-1.05922	0.922	0.984	4.68644e-16	0.0207473	4.88833e-20
Nrp2	0.00532263	0.308153	0.35	0.149	1	5.56923e-20	0.715988	0.422	0.086	1.06784e-15	0.00532263	1.11385e-19
Npnt	2.85387e-09	-1.69234	0.05	0.795	5.47201e-05	7.71335e-20	-1.3259	0.391	0.837	1.47896e-15	2.85387e-09	1.54267e-19
Ckb	2.07182e-05	0.67833	0.65	0.27	0.397251	9.76816e-20	1.10593	0.609	0.195	1.87295e-15	2.07182e-05	1.95363e-19
Cyb5a	2.32479e-09	-1.47014	0.4	0.884	4.45756e-05	1.08089e-19	-1.00377	0.734	0.95	2.0725e-15	2.32479e-09	2.16178e-19
Ank2	0.000158602	0.535669	0.3	0.076	1	2.51423e-19	0.322074	0.266	0.031	4.82078e-15	0.000158602	5.02846e-19
Ttc36	4.77631e-08	-2.44826	0.15	0.762	0.000915809	3.21358e-19	-2.32389	0.25	0.802	6.16171e-15	4.77631e-08	6.42715e-19
Ncor2	9.82804e-06	0.31353	0.65	0.257	0.188443	5.15906e-19	0.582549	0.609	0.214	9.89198e-15	9.82804e-06	1.03181e-18
Abca1	1.05867e-18	0.378294	0.6	0.057	2.0299e-14	1.00285e-17	0.384621	0.422	0.096	1.92286e-13	1.00285e-17	2.11734e-18
Ctsl	4.69091e-07	-0.941186	0.9	0.87	0.00899436	1.36295e-18	1.22954	0.984	0.943	2.61333e-14	4.69091e-07	2.72591e-18
Atp5d	7.52203e-09	-0.749327	1	0.954	0.000144227	1.52727e-18	-0.562582	0.984	0.992	2.92838e-14	7.52203e-09	3.05453e-18
Ybx1	0.00198481	-0.3508	1	0.965	1	1.71954e-18	-0.746316	1	0.99	3.29705e-14	0.00198481	3.43909e-18
Abracl	9.91242e-07	-0.675578	0.15	0.732	0.0190061	2.45065e-18	0.987215	0.922	0.726	4.69887e-14	9.91242e-07	4.90129e-18
Atp1b1	1.73146e-11	-2.26399	0.75	0.959	3.3199e-07	2.48973e-18	-1.20478	0.781	0.968	4.77381e-14	1.73146e-11	4.97946e-18
Paqr5	2.74998e-07	-0.855331	0	0.665	0.00527281	2.54359e-18	-0.751734	0.203	0.777	4.87708e-14	2.74998e-07	5.08718e-18
Prss8	2.49744e-07	-0.811139	0	0.668	0.00478859	2.61618e-18	-0.680984	0.125	0.727	5.01627e-14	2.49744e-07	5.23236e-18
Atpif1	6.00559e-06	-0.842421	0.95	0.973	0.115151	2.78911e-18	-0.660843	1	0.994	5.34784e-14	6.00559e-06	5.57822e-18
mt-Nd2	0.0462914	-0.522632	1	0.986	1	3.26689e-18	-0.710351	1	0.996	6.26393e-14	0.0462914	6.53377e-18
Kcnq1ot1	0.062911	-0.351719	0.8	0.781	1	4.06845e-18	1.1487	1	0.779	7.80085e-14	0.062911	8.13691e-18
Nceh1	4.40748e-06	-0.608384	0.05	0.608	0.084509	5.07163e-18	-0.785459	0.188	0.747	9.72434e-14	4.40748e-06	1.01433e-17
Plscr2	2.05715e-07	-1.11538	0	0.673	0.00394439	9.56315e-18	-0.916183	0.234	0.777	1.83364e-13	2.05715e-07	1.91263e-17
Cox8a	6.75341e-11	-1.34911	1	0.976	1.2949e-06	1.21011e-17	-0.692395	1	0.998	2.32027e-13	6.75341e-11	2.42023e-17
Elavl3	1.55416e-17	0.936076	0.3	0.008	2.97994e-13	4.02052e-16	0.315579	0.109	0.004	7.70894e-12	4.02052e-16	3.10831e-17
Ndufa4	1.1552e-05	-0.472441	1	0.949	0.221498	1.56019e-17	-0.674242	0.984	0.986	2.99151e-13	1.1552e-05	3.12038e-17
Cldn6	2.26712e-07	-0.789435	0	0.67	0.00434698	3.9332e-17	-0.628391	0.062	0.652	7.54152e-13	2.26712e-07	7.8664e-17
Ssbp2	4.63676e-06	0.378685	0.85	0.454	0.0889052	7.72393e-17	0.665116	0.812	0.485	1.48099e-12	4.63676e-06	1.54479e-16
Dbi	1.37862e-08	-1.47641	1	0.919	0.000264336	1.02699e-16	-1.01846	0.875	0.974	1.96915e-12	1.37862e-08	2.05398e-16
Gipc2	1.4494e-06	-0.806438	0	0.616	0.0277908	1.29429e-16	-0.907555	0.141	0.681	2.48167e-12	1.4494e-06	2.58858e-16
Chd4	0.000625136	0.38773	0.95	0.811	1	2.07135e-16	0.608951	0.953	0.832	3.9716e-12	0.000625136	4.14269e-16
Kif21a	4.53758e-07	-0.936312	0.3	0.773	0.00870035	2.64362e-16	-0.878707	0.203	0.769	5.06888e-12	4.53758e-07	5.28725e-16
Cystm1	0.0355435	-0.430299	0.65	0.73	1	2.6948e-16	-0.742673	0.344	0.825	5.16702e-12	0.0355435	5.38961e-16
Fos	0.381593	0.388284	0.35	0.435	1	3.42069e-16	1.3271	0.828	0.488	6.55883e-12	0.381593	6.84137e-16
Slc25a5	7.41531e-11	-1.68402	0.75	0.968	1.42181e-06	4.07547e-16	-1.08443	0.875	0.965	7.8143e-12	7.41531e-11	8.15093e-16
Basp1	0.0711273	2.11005	0.5	0.365	1	4.28215e-16	1.0732	0.766	0.349	8.21059e-12	0.0711273	8.56429e-16
Fabp3	3.46339e-07	-1.78615	0.25	0.751	0.00664071	5.04026e-16	-1.57978	0.094	0.635	9.66419e-12	3.46339e-07	1.00805e-15
Map2	0.373454	0.275076	0.2	0.146	1	5.35207e-16	0.659478	0.656	0.273	1.02621e-11	0.373454	1.07041e-15
Anpep	7.03969e-07	-0.911989	0	0.638	0.0134979	6.80201e-16	-1.09284	0.094	0.643	1.30422e-11	7.03969e-07	1.3604e-15
Uqcrb	1.00234e-06	-0.757407	0.95	0.941	0.0192189	8.15222e-16	-0.676285	0.953	0.979	1.56311e-11	1.00234e-06	1.63044e-15
Cox7b	2.8487e-09	-1.09078	0.85	0.946	5.4621e-05	1.07063e-15	-0.694947	0.938	0.966	2.05282e-11	2.8487e-09	2.14125e-15
Prr15l	1.4494e-06	-0.578345	0	0.616	0.0277908	1.25847e-15	-0.574074	0.109	0.672	2.41299e-11	1.4494e-06	2.51694e-15
Fsd1l	2.77987e-08	0.41464	0.65	0.186	0.000533013	1.26884e-15	0.411063	0.422	0.109	2.43287e-11	2.77987e-08	2.53767e-15
Atp1a1	9.68759e-09	-1.77217	0.8	0.962	0.00018575	1.91531e-15	-1.31396	0.906	0.952	3.67242e-11	9.68759e-09	3.83063e-15
Aes	8.47156e-07	-0.989262	0.65	0.922	0.0162434	2.04014e-15	-0.631709	0.703	0.956	3.91175e-11	8.47156e-07	4.08027e-15
Chpt1	1.30455e-05	-0.949116	0.5	0.778	0.250134	2.39879e-15	-1.18702	0.391	0.796	4.59945e-11	1.30455e-05	4.79759e-15
Cldn7	5.88197e-05	-0.936413	0.3	0.651	1	2.43762e-15	-0.851671	0.062	0.615	4.67389e-11	5.88197e-05	4.87524e-15
Ly6a	2.75355e-10	-2.51779	0.05	0.843	5.27965e-06	2.60025e-15	-1.93248	0.109	0.638	4.98572e-11	2.75355e-10	5.2005e-15
Tmem176b	1.1588e-08	-1.4579	0.65	0.919	0.000222188	3.1983e-15	-1.15829	0.922	0.978	6.13243e-11	1.1588e-08	6.39661e-15
Ggt1	6.98419e-09	-1.89885	0.2	0.816	0.000133915	3.20503e-15	-1.30628	0.594	0.876	6.14532e-11	6.98419e-09	6.41006e-15
Uqcr10	3.30498e-08	-0.900805	1	0.943	0.000633696	3.87384e-15	-0.702164	0.984	0.975	7.42771e-11	3.30498e-08	7.74769e-15
Nedd4	0.00647447	-0.414454	0.95	0.884	1	3.97617e-15	0.467771	1	0.953	7.6239e-11	0.00647447	7.95233e-15
Acadm	1.12887e-07	-1.32785	0.4	0.83	0.0021645	4.22654e-15	-0.881112	0.734	0.937	8.10398e-11	1.12887e-07	8.45309e-15
Ppp1r1a	0.422921	-0.364932	0.15	0.23	1	6.95118e-15	0.89974	0.516	0.152	1.33282e-10	0.422921	1.39024e-14
Uqcrc1	0.0016091	-0.520336	1	0.919	1	7.08772e-15	-0.699212	0.766	0.949	1.359e-10	0.0016091	1.41754e-14
Fuca2	8.41622e-06	-0.749072	0.1	0.638	0.161373	7.78987e-15	-0.644769	0.062	0.611	1.49363e-10	8.41622e-06	1.55797e-14
Taldo1	8.71129e-05	-0.601362	0.85	0.878	1	9.07659e-15	-0.584375	0.812	0.943	1.74035e-10	8.71129e-05	1.81532e-14
Cox4i1	0.0015468	-0.362055	1	0.986	1	9.83579e-15	-0.465971	1	0.997	1.88591e-10	0.0015468	1.96716e-14
Fahd1	2.63752e-06	-0.800206	0.2	0.722	0.0505718	1.05546e-14	-0.590264	0.219	0.731	2.02375e-10	2.63752e-06	2.11093e-14
Plpp2	9.9891e-06	-0.579058	0.15	0.697	0.191531	1.13722e-14	-0.533502	0.188	0.72	2.1805e-10	9.9891e-06	2.27443e-14
Hoxb8	0.00246799	-0.364954	0.15	0.522	1	1.42384e-14	0.844641	0.828	0.586	2.73007e-10	0.00246799	2.84768e-14
Aprt	0.000929047	-0.559056	0.8	0.859	1	1.45028e-14	-0.619516	0.797	0.942	2.78077e-10	0.000929047	2.90057e-14
Hao2	2.27876e-05	-0.965879	0.05	0.557	0.43693	1.89452e-14	-1.19502	0.141	0.642	3.63254e-10	2.27876e-05	3.78903e-14
Mrpl12	0.0578156	-0.315647	1	0.862	1	2.07645e-14	-0.696333	0.672	0.911	3.98138e-10	0.0578156	4.15289e-14
Pnrc1	3.59943e-06	0.492975	0.95	0.7	0.0690154	2.30302e-14	0.527681	0.953	0.842	4.4158e-10	3.59943e-06	4.60603e-14
Fxyd2	1.50518e-11	-3.50232	0.2	0.919	2.88604e-07	5.45993e-14	-1.88694	0.641	0.878	1.04689e-09	1.50518e-11	1.09199e-13
Txn1	6.81585e-07	-0.939858	0.65	0.9	0.0130687	6.48616e-14	-0.567334	0.906	0.973	1.24366e-09	6.81585e-07	1.29723e-13
Dach1	1.06582e-05	-0.489365	0.05	0.597	0.20436	6.54863e-14	0.558314	0.797	0.536	1.25563e-09	1.06582e-05	1.30973e-13
Tpt1	1.12576e-06	-0.495134	1	1	0.0215854	6.80846e-14	0.317973	1	1	1.30545e-09	1.12576e-06	1.36169e-13
Ctsh	2.26072e-05	-0.722195	0.1	0.584	0.43347	6.82183e-14	-0.773044	0.203	0.679	1.30802e-09	2.26072e-05	1.36437e-13
Atp5k	1.80385e-05	-0.590625	1	0.981	0.345869	6.85106e-14	-0.651433	1	0.983	1.31362e-09	1.80385e-05	1.37021e-13
Atp5b	4.18785e-11	-1.04222	1	0.992	8.02979e-07	8.36656e-14	-0.641291	1	0.997	1.6042e-09	4.18785e-11	1.67331e-13
Eml5	2.58117e-09	0.575144	0.5	0.095	4.94914e-05	8.95163e-14	0.459922	0.391	0.105	1.71639e-09	2.58117e-09	1.79033e-13
Tulp4	9.78819e-14	0.708783	1	0.438	1.87679e-09	0.000487404	0.278015	0.516	0.398	1	0.000487404	1.95764e-13
Mcrip2	0.1463	-0.351016	0.6	0.684	1	1.11636e-13	-0.643355	0.141	0.637	2.1405e-09	0.1463	2.23271e-13
Atp5a1	3.30709e-10	-0.825327	1	0.989	6.34101e-06	1.25278e-13	-0.56819	1	0.997	2.40207e-09	3.30709e-10	2.50555e-13
Hspe1	0.000558548	-0.430935	1	0.957	1	1.31085e-13	-0.53889	0.984	0.979	2.51343e-09	0.000558548	2.62171e-13
Mpc2	4.62466e-10	-1.33593	0.95	0.941	8.86731e-06	1.41368e-13	-0.544738	1	0.987	2.71058e-09	4.62466e-10	2.82735e-13
Eva1b	0.0340503	-0.364604	0.4	0.576	1	1.50604e-13	0.665137	0.906	0.637	2.88768e-09	0.0340503	3.01208e-13
Mep1a	1.17783e-05	-1.4385	0	0.549	0.225837	1.52203e-13	-1.33183	0.062	0.56	2.91834e-09	1.17783e-05	3.04406e-13
Mrpl42	0.140903	-0.299907	0.9	0.886	1	1.97314e-13	-0.573243	0.719	0.918	3.78329e-09	0.140903	3.94627e-13
Lbp	0.0121847	-0.287169	0.05	0.305	1	2.07149e-13	0.94828	0.516	0.183	3.97188e-09	0.0121847	4.14299e-13
Clip1	4.46936e-05	0.332494	0.7	0.346	0.856955	2.82569e-13	0.620032	0.672	0.383	5.41798e-09	4.46936e-05	5.65139e-13
Cox5b	0.000147471	-0.573308	1	0.946	1	3.03151e-13	-0.706749	0.953	0.975	5.81261e-09	0.000147471	6.06301e-13
Rida	2.64497e-07	-1.62677	0.4	0.816	0.00507147	3.72148e-13	-0.996031	0.625	0.943	7.13557e-09	2.64497e-07	7.44296e-13
Folr1	7.18676e-07	-1.20119	0.05	0.67	0.0137799	3.77488e-13	-0.916203	0.078	0.585	7.23796e-09	7.18676e-07	7.54976e-13
Tmem176a	7.9838e-09	-1.45179	0.35	0.835	0.000153081	4.05947e-13	-0.938867	0.812	0.959	7.78363e-09	7.9838e-09	8.11894e-13
Slc25a3	3.31347e-11	-1.10956	1	0.978	6.35325e-07	4.4049e-13	-0.537984	0.984	0.991	8.44595e-09	3.31347e-11	8.80979e-13
Uqcr11	4.53759e-05	-0.543149	1	0.957	0.870038	4.79977e-13	-0.629025	0.984	0.981	9.20309e-09	4.53759e-05	9.59955e-13
Entpd5	1.37877e-05	-0.556602	0	0.543	0.264366	5.09508e-13	-0.664778	0.234	0.687	9.76932e-09	1.37877e-05	1.01902e-12
Gpx1	1.16725e-07	-1.01789	0.45	0.873	0.00223808	5.17931e-13	-0.61373	0.812	0.939	9.93082e-09	1.16725e-07	1.03586e-12
Pter	4.68594e-05	-0.938913	0.1	0.568	0.898481	5.29035e-13	-0.923359	0.156	0.632	1.01437e-08	4.68594e-05	1.05807e-12
Smtnl2	2.24773e-05	-0.489271	0.1	0.605	0.43098	5.77995e-13	-0.372877	0.031	0.527	1.10825e-08	2.24773e-05	1.15599e-12
Iah1	0.0547408	-0.462877	0.7	0.749	1	5.95352e-13	-0.815243	0.578	0.853	1.14153e-08	0.0547408	1.1907e-12
Cecr2	5.99797e-13	0.80407	0.8	0.211	1.15005e-08	6.58379e-05	0.271487	0.438	0.275	1	6.58379e-05	1.19959e-12
Ccdc88a	6.55717e-13	0.924667	0.95	0.405	1.25727e-08	6.83865e-10	0.409847	0.656	0.365	1.31124e-05	6.83865e-10	1.31143e-12
Cep170	1.87118e-05	0.294691	0.5	0.157	0.358779	7.72087e-13	0.34316	0.453	0.156	1.4804e-08	1.87118e-05	1.54417e-12
Hoga1	4.08188e-06	-0.655854	0	0.584	0.0782659	8.26542e-13	-0.704136	0.203	0.668	1.58481e-08	4.08188e-06	1.65308e-12
Slc39a5	1.00471e-05	-0.922397	0	0.554	0.192644	8.35734e-13	-0.872195	0.109	0.581	1.60244e-08	1.00471e-05	1.67147e-12
Hpn	1.45408e-06	-0.821888	0.1	0.662	0.0278805	9.2421e-13	-0.570872	0.062	0.549	1.77208e-08	1.45408e-06	1.84842e-12
Sdc4	2.71199e-09	-1.15715	0.1	0.814	5.19998e-05	9.5704e-13	-0.674457	0.656	0.896	1.83503e-08	2.71199e-09	1.91408e-12
Pdzk1ip1	1.29318e-07	-1.79158	0.15	0.738	0.00247954	1.1642e-12	-1.19007	0.266	0.694	2.23224e-08	1.29318e-07	2.3284e-12
Dcxr	2.82008e-06	-0.795089	0.05	0.624	0.0540721	1.31839e-12	-0.638529	0.109	0.595	2.52787e-08	2.82008e-06	2.63677e-12
Akr7a5	0.00702924	-0.592175	0.85	0.832	1	1.33804e-12	-0.73844	0.578	0.877	2.56555e-08	0.00702924	2.67608e-12
Cth	9.25751e-07	-0.827844	0	0.63	0.0177503	1.35456e-12	-0.798928	0.156	0.621	2.59723e-08	9.25751e-07	2.70912e-12
Tmx4	1.47468e-12	0.923054	0.9	0.341	2.82756e-08	0.000123574	0.251182	0.5	0.367	1	0.000123574	2.94937e-12
Car4	1.00919e-05	-0.788744	0.1	0.627	0.193502	1.48907e-12	-0.651083	0.062	0.549	2.85515e-08	1.00919e-05	2.97815e-12
Gas2	0.0621328	-0.693082	0.55	0.562	1	1.5154e-12	-0.941251	0.078	0.548	2.90563e-08	0.0621328	3.0308e-12
Srsf10	0.00101448	0.266456	0.9	0.719	1	1.57111e-12	0.552999	0.859	0.72	3.01245e-08	0.00101448	3.14223e-12
Aspa	0.464947	-0.339697	0.5	0.435	1	1.57446e-12	-0.899154	0.078	0.552	3.01888e-08	0.464947	3.14893e-12
Hoxb6	7.11465e-05	-0.456503	0	0.484	1	1.61468e-12	0.590869	0.891	0.616	3.09599e-08	7.11465e-05	3.22937e-12
Lrp2	1.25061e-06	-1.98297	0.1	0.686	0.0239793	1.63967e-12	-1.55941	0.125	0.578	3.14391e-08	1.25061e-06	3.27935e-12
Lgmn	1.02271e-06	-0.981708	0.35	0.786	0.0196094	1.66958e-12	-0.649437	0.516	0.878	3.20125e-08	1.02271e-06	3.33916e-12
Cox7a2	0.0697342	-0.28827	1	0.946	1	1.80555e-12	-0.61167	0.938	0.982	3.46196e-08	0.0697342	3.61109e-12
0610005C13Rik	8.72653e-05	-0.858167	0.15	0.573	1	1.81958e-12	-0.682754	0.078	0.55	3.48887e-08	8.72653e-05	3.63916e-12
Pla2g16	5.69355e-06	-0.571072	0	0.573	0.109168	1.83478e-12	-0.493665	0.188	0.657	3.51801e-08	5.69355e-06	3.66956e-12
Selenbp1	4.67473e-07	-0.890376	0.05	0.678	0.00896332	1.86148e-12	-0.701791	0.312	0.709	3.56921e-08	4.67473e-07	3.72297e-12
Tst	3.522e-07	-1.23155	0.05	0.686	0.00675308	1.86981e-12	-0.930369	0.219	0.663	3.58516e-08	3.522e-07	3.73961e-12
Oxct1	1.57356e-08	-1.30619	0.7	0.908	0.000301714	1.96509e-12	-0.851793	0.656	0.882	3.76787e-08	1.57356e-08	3.93018e-12
Tmem37	9.8525e-08	-1.27346	0.05	0.714	0.00188912	1.97057e-12	-0.877691	0.031	0.513	3.77836e-08	9.8525e-08	3.94113e-12
Cox6b1	5.95131e-07	-0.775408	0.9	0.954	0.011411	2.04433e-12	-0.581411	1	0.981	3.9198e-08	5.95131e-07	4.08866e-12
Mdh2	6.88291e-06	-0.704739	0.95	0.932	0.131973	2.22123e-12	-0.592485	0.938	0.971	4.25898e-08	6.88291e-06	4.44246e-12
Abhd17c	0.000299275	-0.466631	0.35	0.657	1	2.29836e-12	-0.516205	0.266	0.727	4.40688e-08	0.000299275	4.59673e-12
Tmem174	0.000108569	-1.13844	0.05	0.503	1	2.43548e-12	-1.0723	0	0.476	4.6698e-08	0.000108569	4.87097e-12
Serf2	5.60786e-06	-0.470845	1	0.949	0.107525	2.48887e-12	-0.353507	1	0.979	4.77215e-08	5.60786e-06	4.97773e-12
Cyp4a31	0.000664427	-0.40545	0	0.392	1	2.72835e-12	-0.719941	0.031	0.504	5.23135e-08	0.000664427	5.45671e-12
Atp5g3	5.07537e-07	-0.769261	0.95	0.946	0.00973151	2.9829e-12	-0.61286	0.969	0.976	5.71941e-08	5.07537e-07	5.9658e-12
Sostdc1	1.46528e-07	-1.8705	0.1	0.719	0.00280954	3.49883e-12	-1.36415	0.359	0.752	6.70866e-08	1.46528e-07	6.99766e-12
Chga	3.78361e-12	1.08574	0.3	0.019	7.25469e-08	0.13325	-0.686986	0.141	0.218	1	0.13325	7.56722e-12
Klf7	3.72942e-07	0.377845	0.8	0.316	0.00715078	4.45741e-12	0.537148	0.656	0.351	8.54663e-08	3.72942e-07	8.91482e-12
Suclg2	0.00178064	-0.438341	0.6	0.768	1	4.52559e-12	-0.510778	0.375	0.789	8.67737e-08	0.00178064	9.05119e-12
Cdh1	0.0314387	-0.348781	0.3	0.524	1	4.80718e-12	-0.452446	0.078	0.551	9.21729e-08	0.0314387	9.61437e-12
Acy3	0.000739971	-0.665628	0.1	0.503	1	5.00662e-12	-0.844615	0.062	0.522	9.59969e-08	0.000739971	1.00132e-11
Chd7	0.000498834	0.431321	0.65	0.378	1	5.03289e-12	0.609196	0.656	0.379	9.65007e-08	0.000498834	1.00658e-11
Dhrs4	7.96276e-06	-0.721777	0.3	0.73	0.152678	5.10258e-12	-0.654867	0.422	0.792	9.78368e-08	7.96276e-06	1.02052e-11
Slc9a3r1	0.00010045	-0.838717	0.5	0.735	1	5.6555e-12	-0.666353	0.297	0.713	1.08439e-07	0.00010045	1.1311e-11
Dpp4	3.65554e-08	-1.14263	0.1	0.751	0.000700912	6.12758e-12	-0.662218	0.453	0.829	1.1749e-07	3.65554e-08	1.22552e-11
Amn	8.35939e-06	-1.27356	0.05	0.586	0.160283	6.28055e-12	-0.945609	0.172	0.603	1.20423e-07	8.35939e-06	1.25611e-11
Atp5j	0.000186739	-0.449522	1	0.941	1	6.6626e-12	-0.479514	1	0.985	1.27749e-07	0.000186739	1.33252e-11
Tmprss2	0.000275966	-0.40074	0	0.43	1	7.16272e-12	-0.406883	0.031	0.497	1.37338e-07	0.000275966	1.43254e-11
Cyba	1.81026e-10	-2.35721	0.35	0.889	3.471e-06	7.4107e-12	-0.820196	0.844	0.967	1.42093e-07	1.81026e-10	1.48214e-11
Sema5a	0.041417	-0.271303	0.35	0.497	1	7.54598e-12	0.65532	0.844	0.65	1.44687e-07	0.041417	1.5092e-11
Ier2	0.0561457	-0.428382	0.5	0.597	1	7.94136e-12	0.732184	0.938	0.749	1.52268e-07	0.0561457	1.58827e-11
Eps8l2	0.000103392	-0.468849	0.1	0.541	1	8.25093e-12	-0.449853	0.078	0.564	1.58203e-07	0.000103392	1.65019e-11
Malat1	0.10092	-0.516669	1	0.997	1	9.55689e-12	0.474543	1	0.999	1.83244e-07	0.10092	1.91138e-11
Aif1l	2.69673e-05	-0.695506	0.1	0.641	0.517071	1.10478e-11	-0.50489	0.062	0.525	2.1183e-07	2.69673e-05	2.20956e-11
Nipsnap1	0.000595342	-0.52275	0.35	0.732	1	1.11268e-11	-0.548642	0.391	0.8	2.13345e-07	0.000595342	2.22535e-11
Map4k4	1.11537e-11	0.778884	0.95	0.43	2.13861e-07	3.11234e-07	0.380155	0.641	0.442	0.0059676	3.11234e-07	2.23074e-11
Vamp8	2.03499e-09	-1.05675	0.2	0.83	3.90189e-05	1.19548e-11	-0.476541	0.719	0.91	2.29222e-07	2.03499e-09	2.39097e-11
Cyc1	7.47685e-05	-0.687587	0.9	0.935	1	1.22338e-11	-0.722803	0.797	0.945	2.34571e-07	7.47685e-05	2.44676e-11
2610528J11Rik	5.69355e-06	-0.596574	0	0.573	0.109168	1.36643e-11	-0.453968	0.031	0.49	2.62e-07	5.69355e-06	2.73287e-11
Spint1	0.00666729	-0.367372	0.3	0.562	1	1.36762e-11	-0.454821	0.141	0.605	2.62227e-07	0.00666729	2.73524e-11
Psip1	1.37787e-11	0.98995	1	0.624	2.64194e-07	0.00459193	0.265394	0.672	0.637	1	0.00459193	2.75575e-11
Pepd	0.000648875	-0.549522	0.7	0.792	1	1.49553e-11	-0.604294	0.547	0.845	2.86753e-07	0.000648875	2.99106e-11
Nfix	1.54147e-11	0.48934	0.7	0.151	2.95562e-07	1.05583e-09	0.309863	0.297	0.081	2.02445e-05	1.05583e-09	3.08295e-11
Usmg5	0.000397936	-0.592327	1	0.914	1	1.61603e-11	-0.645637	0.906	0.957	3.09858e-07	0.000397936	3.23207e-11
Chic2	3.53719e-07	0.793634	0.8	0.473	0.00678222	1.65204e-11	0.448025	0.719	0.449	3.16762e-07	3.53719e-07	3.30408e-11
Mif	0.00103822	-0.436757	1	0.951	1	1.78013e-11	-0.470601	1	0.989	3.41323e-07	0.00103822	3.56027e-11
mt-Cytb	0.000109573	-0.75335	1	0.986	1	1.81614e-11	-0.554649	1	0.989	3.48227e-07	0.000109573	3.63228e-11
Cdh16	5.55992e-09	-1.39808	0.15	0.808	0.000106606	1.85207e-11	-0.708084	0.406	0.792	3.55116e-07	5.55992e-09	3.70414e-11
Kif3a	2.04972e-11	0.763053	0.95	0.508	3.93013e-07	0.00184797	0.27654	0.641	0.577	1	0.00184797	4.09943e-11
Atp5o.1	2.10079e-07	-0.752511	1	0.959	0.00402805	2.36096e-11	-0.605316	1	0.983	4.5269e-07	2.10079e-07	4.72191e-11
Smc6	2.40326e-11	0.913843	1	0.643	4.60801e-07	5.62483e-06	0.394103	0.781	0.709	0.10785	5.62483e-06	4.80652e-11
Fads3	0.000132951	-0.587285	0	0.459	1	2.49823e-11	-0.711756	0.047	0.488	4.7901e-07	0.000132951	4.99645e-11
Aplp1	0.000297052	0.667148	0.35	0.108	1	2.52954e-11	0.786964	0.469	0.181	4.85014e-07	0.000297052	5.05908e-11
Plau	0.00619825	-0.27079	0	0.284	1	2.59608e-11	-0.718295	0.047	0.498	4.97772e-07	0.00619825	5.19216e-11
Pecr	0.000242605	-0.584026	0.25	0.595	1	2.77498e-11	-0.613755	0.281	0.714	5.32074e-07	0.000242605	5.54996e-11
Acaa1b	1.54819e-05	-0.742176	0.05	0.573	0.296851	2.96077e-11	-0.61103	0.094	0.55	5.67697e-07	1.54819e-05	5.92153e-11
Bphl	9.30992e-08	-0.944261	0.15	0.754	0.00178508	3.29934e-11	-0.628335	0.438	0.813	6.32615e-07	9.30992e-08	6.59868e-11
Eml4	3.36086e-11	0.537466	0.9	0.327	6.44411e-07	1.47935e-07	0.368473	0.516	0.276	0.00283651	1.47935e-07	6.72172e-11
Sdhb	0.0490308	-0.394498	1	0.865	1	3.36893e-11	-0.707081	0.812	0.91	6.45958e-07	0.0490308	6.73785e-11
Bcam	5.57029e-07	-1.01041	0.2	0.727	0.0106805	3.75716e-11	-0.590745	0.234	0.665	7.20399e-07	5.57029e-07	7.51433e-11
Atp6v1a	0.0055831	-0.627881	0.85	0.781	1	3.96938e-11	-0.606934	0.609	0.891	7.61089e-07	0.0055831	7.93876e-11
Sfxn1	0.000177313	-0.739913	0.5	0.797	1	3.9921e-11	-0.662251	0.734	0.869	7.65445e-07	0.000177313	7.9842e-11
Gpi1	6.16584e-06	-0.81634	0.85	0.897	0.118224	4.20116e-11	-0.57922	0.781	0.957	8.05531e-07	6.16584e-06	8.40232e-11
Cox6a1	0.0307774	-0.415674	1	0.938	1	5.02313e-11	-0.596191	0.938	0.962	9.63136e-07	0.0307774	1.00463e-10
Scamp2	0.0068605	-0.369699	0.5	0.689	1	5.838e-11	-0.478413	0.375	0.749	1.11938e-06	0.0068605	1.1676e-10
mt-Nd4	0.0342638	-0.517223	1	0.986	1	5.84887e-11	-0.496114	1	0.988	1.12146e-06	0.0342638	1.16977e-10
Pnisr	0.000107559	0.377915	1	0.768	1	6.01093e-11	0.435956	0.984	0.819	1.15254e-06	0.000107559	1.20219e-10
Napsa	5.59725e-06	-1.57799	0.05	0.6	0.107322	6.16481e-11	-2.1948	0.172	0.585	1.18204e-06	5.59725e-06	1.23296e-10
Ostf1	1.80693e-05	-0.644909	0.4	0.762	0.346461	6.17439e-11	-0.538425	0.484	0.813	1.18388e-06	1.80693e-05	1.23488e-10
Cideb	0.000174123	-0.456444	0	0.449	1	6.85338e-11	-0.485018	0.062	0.505	1.31407e-06	0.000174123	1.37068e-10
Nsd3	0.0011154	0.260585	0.85	0.557	1	7.14851e-11	0.450811	0.812	0.609	1.37065e-06	0.0011154	1.4297e-10
Pgam1	7.61372e-11	-1.37628	0.9	0.954	1.45986e-06	3.36951e-06	-0.361466	0.984	0.987	0.064607	3.36951e-06	1.52274e-10
Glud1	3.09251e-10	-1.4689	0.6	0.927	5.92958e-06	7.72123e-11	-0.601399	0.922	0.976	1.48047e-06	3.09251e-10	1.54425e-10
Lactb2	0.000107686	-0.70729	0.15	0.592	1	7.94391e-11	-0.590575	0.266	0.666	1.52317e-06	0.000107686	1.58878e-10
Pth1r	1.46649e-08	-1.46879	0.25	0.811	0.000281185	8.66878e-11	-0.849579	0.5	0.82	1.66215e-06	1.46649e-08	1.73376e-10
Bex1	9.4271e-11	0.858243	0.95	0.497	1.80755e-06	0.0648976	0.505145	0.469	0.425	1	0.0648976	1.88542e-10
Ezr	1.01388e-10	-1.59485	0.3	0.895	1.94401e-06	2.63251e-06	-0.351187	0.938	0.974	0.0504757	2.63251e-06	2.02775e-10
Slc27a2	0.00581362	-0.625687	0.15	0.427	1	1.05832e-10	-1.04083	0.016	0.442	2.02921e-06	0.00581362	2.11663e-10
Hmgcs1	0.00183756	-0.669032	0.75	0.843	1	1.15762e-10	-0.83835	0.547	0.853	2.21962e-06	0.00183756	2.31524e-10
Uqcrq	0.00364215	-0.572315	1	0.927	1	1.20391e-10	-0.746791	0.891	0.95	2.30838e-06	0.00364215	2.40782e-10
Id2	0.135862	-0.390047	0.7	0.768	1	1.21233e-10	0.636081	0.922	0.807	2.32453e-06	0.135862	2.42466e-10
[truncated: 615 more rows]

## Sheet: N.tubule.6_PST.Mut.CTRL.marker
Gene	Mutant_p_val	Mutant_avg_logFC	Mutant_pct.1	Mutant_pct.2	Mutant_p_val_adj	CTRL_p_val	CTRL_avg_logFC	CTRL_pct.1	CTRL_pct.2	CTRL_p_val_adj	max_pval	minimump_p_val
[truncated: 958 more rows]

[truncated: 2 more sheets: N.tubule.7_CNT.Mut.CTRL.Marker, N.tubule.8_DCT.Mut.CTRL.marker]
