# Supplementary material for: Smarca4 deficiency induces Pttg1 oncogene upregulation and hyperproliferation of tubular and interstitial cells during kidney development
Source: Front Cell Dev Biol. 2023 Sep 4;11:1233317. doi: 10.3389/fcell.2023.1233317 (PMC10506413; doi:10.3389/fcell.2023.1233317)
Supplement: Supplementary file 9 [file Table8.XLSX]

## Sheet: N.tubule0_EPT.MutVsCTRL.DEGs
Gene	p_val	avg_logFC	pct.1	pct.2	p_val_adj
Cdkn1c	NA	2.21335	0.839	0.542	NA
Gm10260	3.19e-16	2.16441	0.586	0.015	3.2e-14
Fabp4	NA	1.82542	0.402	0.387	NA
Serpina6	NA	1.62688	0.126	0.027	NA
Ly6a	2.1e-08	1.55933	0.954	0.476	4.25e-07
Hist1h2ap	6.47e-18	1.46627	0.747	0.536	8.89e-16
Spink1	8.78e-10	1.38981	0.885	0.58	2.45e-08
Tmsb4x	8.23e-13	1.35707	0.989	0.789	4.46e-11
Igfbp5	1e-15	1.35653	0.874	0.336	9.45e-14
Ifitm2	5.05e-25	1.35185	0.977	0.714	2.27e-22
Slc34a1	1.78e-08	1.33969	0.805	0.426	3.64e-07
Acsm2	1.16e-12	1.32439	0.793	0.149	6.07e-11
Clec18a	2.42e-28	1.30097	0.943	0.375	2.31e-25
Hmgb2	1.14e-24	1.30064	0.943	0.872	4.57e-22
Ube2c	2.04e-11	1.29788	0.563	0.348	8.02e-10
Emid1	1.61e-22	1.28706	0.943	0.44	5.13e-20
Csad	1.05e-18	1.28672	0.92	0.667	1.64e-16
Ass1	9.11e-12	1.26457	0.816	0.289	3.87e-10
Igfbp4	1.39e-16	1.23197	1	0.679	1.49e-14
Tubb4b	9.9e-21	1.22081	0.92	0.824	2.16e-18
Mafb	NA	1.22052	0.207	0.065	NA
Cenpf	9.09e-08	1.21573	0.379	0.152	1.57e-06
Ptn	4.74e-11	1.19135	0.678	0.327	1.7e-09
H19	6.39e-11	1.17804	0.736	0.336	2.24e-09
Stmn1	2.11e-12	1.16564	0.908	0.711	1.01e-10
Col1a2	NA	1.16494	0.586	0.321	NA
Scd2	1.56e-18	1.14148	0.897	0.589	2.34e-16
Mep1b	2.49e-06	1.13753	0.414	0.119	3.03e-05
Birc5	4.04e-12	1.12486	0.506	0.208	1.87e-10
Dao	2.26e-17	1.12158	0.839	0.31	2.83e-15
Aldob	1.16e-07	1.12023	0.954	0.616	1.97e-06
Tmem37	6.47e-17	1.10176	0.897	0.432	7.49e-15
Mest	8.53e-13	1.09357	0.54	0.363	4.56e-11
H2afz	4.11e-17	1.08737	0.977	0.964	4.91e-15
Afp	4.92e-13	1.0791	0.77	0.405	2.79e-11
Apoe	2.15e-08	1.07907	0.908	0.583	4.32e-07
Gsn	3.18e-13	1.07725	0.598	0.155	1.83e-11
Top2a	3.18e-08	1.07666	0.414	0.22	6.13e-07
Cldn7	1.56e-06	1.07606	0.805	0.619	2.02e-05
Aqp1	0.000339341	1.07227	0.575	0.205	0.00213463
Lrp2	1.13e-06	1.06691	0.966	0.705	1.5e-05
Wfdc2	6.25e-20	1.06557	0.77	0.232	1.14e-17
Col1a1	9.07e-12	1.05522	0.517	0.247	3.87e-10
Asb9	1.56e-16	1.04515	0.851	0.214	1.63e-14
Sparc	5.75e-08	1.03336	0.816	0.64	1.06e-06
Cldn10	5.39e-13	1.01441	0.747	0.363	3.03e-11
Slc22a13	0.000109322	1.01323	0.345	0.065	0.00081358
Alcam	2.54e-18	1.01181	0.724	0.321	3.66e-16
H1fx	3.15e-10	1.00802	0.793	0.44	9.59e-09
Tst	8.13e-25	1.00589	0.989	0.78	3.45e-22
Pclaf	6.25e-09	0.999617	0.529	0.25	1.46e-07
Vim	6.45e-10	0.995373	0.713	0.562	1.85e-08
Dhcr24	2.24e-28	0.993342	0.839	0.283	2.31e-25
Col3a1	8.09e-09	0.978394	0.506	0.223	1.84e-07
Ccnb2	0.000332282	0.971559	0.379	0.131	0.00209368
Fmo1	1.33e-05	0.971446	0.736	0.446	0.000130011
Serpinh1	1.27e-26	0.968785	0.989	0.955	8.07e-24
Hist3h2ba	3.87e-14	0.963991	0.701	0.077	2.67e-12
Car4	6.48e-13	0.959531	0.908	0.449	3.54e-11
Ccnd3	1.11e-22	0.944053	0.931	0.667	3.67e-20
Hmgn2	3.41e-27	0.932681	0.977	0.899	2.37e-24
Dcn	NA	0.932099	0.322	0.107	NA
Ugt2b37	6.48e-08	0.932039	0.517	0.065	1.18e-06
Oxct1	4.33e-16	0.928706	0.943	0.914	4.24e-14
Mdk	7.31e-10	0.927833	0.908	0.804	2.06e-08
Cndp2	3.11e-13	0.914913	0.989	0.839	1.8e-11
Cyp2d26	4.91e-07	0.90844	0.586	0.14	7.15e-06
Palm3	1.91e-10	0.90761	0.851	0.384	6.12e-09
Espn	8.66e-16	0.907586	0.77	0.339	8.27e-14
Tmsb10	1.06e-09	0.906378	0.989	0.976	2.9e-08
Fdps	1.79e-19	0.902304	0.828	0.464	3.12e-17
Tpm3-rs7	2.32e-18	0.899948	0.724	0.104	3.41e-16
Slc15a2	3.71e-11	0.897321	0.724	0.342	1.38e-09
Bcam	1.81e-11	0.895186	0.839	0.586	7.21e-10
Anxa2	6.52e-06	0.89272	0.77	0.381	7.04e-05
Fbp2	8.49e-06	0.891801	0.621	0.307	8.84e-05
Tubb5	1.34e-09	0.890056	0.943	0.866	3.53e-08
Tkt	9.4e-22	0.885456	0.977	0.857	2.57e-19
Hdc	0.00536047	0.874761	0.805	0.435	0.0219326
Smarca4	2.85e-23	0.872429	0.724	0.277	9.91e-21
Xylb	1.15e-18	0.869068	0.69	0.283	1.75e-16
Trim35	2.34e-26	0.864548	0.828	0.533	1.37e-23
Tshz2	1.12e-13	0.864312	0.747	0.417	7.08e-12
Txndc5	3.82e-21	0.86285	0.897	0.682	8.84e-19
Serpina1a	0.000124542	0.862	0.644	0.226	0.00090741
Grb10	3.41e-22	0.860114	0.839	0.583	9.66e-20
Susd3	1.04e-07	0.858727	0.839	0.429	1.79e-06
Prdx4	1.41e-20	0.858315	0.885	0.682	2.83e-18
H2afx	5.87e-11	0.858063	0.77	0.649	2.08e-09
Marcks	3.88e-10	0.854071	0.805	0.562	1.16e-08
Mki67	0.000190519	0.848011	0.345	0.134	0.00129896
AC160336.1	1.75e-12	0.846137	0.874	0.682	8.7e-11
Pcp4	NA	0.843403	0.471	0.205	NA
Slc22a19	4.65e-08	0.843228	0.494	0.17	8.77e-07
Ptma	4.11e-24	0.840663	1	1	1.49e-21
Cenpa	5.51e-05	0.836667	0.379	0.158	0.000445238
Habp2	6.76e-14	0.833621	0.678	0.11	4.53e-12
Cdc20	3.05e-09	0.830785	0.437	0.185	7.49e-08
Manf	1.2e-11	0.828553	0.908	0.884	4.96e-10
Vil1	2.18e-15	0.826954	0.816	0.256	2e-13
Vldlr	1.81e-11	0.825452	0.77	0.467	7.21e-10
Asap1	1.86e-25	0.820737	0.851	0.497	8.88e-23
Gnai2	1.23e-17	0.820138	0.931	0.92	1.61e-15
Akr7a5	1.06e-16	0.819019	0.966	0.938	1.17e-14
Rbp1	2.35e-08	0.814443	0.724	0.271	4.69e-07
Fn1	2.06e-06	0.810733	0.575	0.315	2.56e-05
Stard4	1.11e-13	0.810224	0.632	0.321	7.08e-12
Fxyd2	6.27e-05	0.810119	1	0.949	0.000497232
Penk	NA	0.809533	0.287	0.14	NA
Bex1	2.25e-10	0.80776	0.747	0.417	7.09e-09
Abcc2	1.1e-09	0.806476	0.552	0.128	3.01e-08
Hpn	1.38e-11	0.805548	0.805	0.568	5.66e-10
H3f3b	1.57e-16	0.802368	0.989	0.997	1.63e-14
Slc47a1	1.44e-14	0.800939	0.782	0.435	1.05e-12
Cks2	8.74e-08	0.800903	0.92	0.798	1.53e-06
Nusap1	0.00165239	0.800321	0.299	0.113	0.00814265
Hist1h1b	0.000316647	0.796414	0.368	0.143	0.00200342
Smc2	1.18e-09	0.79443	0.517	0.304	3.19e-08
Smim24	1.24e-05	0.79003	0.816	0.571	0.000123051
Tkfc	2.67e-10	0.789502	0.828	0.554	8.27e-09
Gm266	1.29e-11	0.788351	0.828	0.637	5.29e-10
Ube2s	5.67e-13	0.785168	0.943	0.929	3.14e-11
Gkap1	1.8e-14	0.784808	0.966	0.762	1.28e-12
Smc4	1.93e-12	0.783457	0.77	0.539	9.52e-11
Hoxb5os	2.54e-13	0.783219	0.759	0.354	1.49e-11
Acta2	NA	0.777035	0.621	0.405	NA
Akr1c19	4.86e-10	0.776289	0.644	0.229	1.43e-08
Hmga1	6.57e-21	0.775406	0.713	0.36	1.48e-18
Cdca8	1.68e-06	0.77459	0.333	0.211	2.15e-05
Palld	2.81e-07	0.774362	0.552	0.259	4.33e-06
Gpd1	7.48e-08	0.773125	0.724	0.372	1.33e-06
Hmgcs1	5.67e-07	0.770952	0.954	0.938	8.06e-06
Ush1c	1.46e-11	0.770624	0.678	0.211	5.91e-10
Pdzk1	1.55e-05	0.768955	0.989	0.842	0.000149158
Serpinf1	2.79e-05	0.764485	0.494	0.065	0.000247171
Cdk1	4.37e-07	0.76383	0.517	0.268	6.44e-06
Meis2	9.3e-06	0.763416	0.46	0.19	9.54e-05
Lmnb1	1.01e-12	0.762857	0.724	0.512	5.31e-11
Slc25a5	3.54e-12	0.762697	0.989	0.979	1.66e-10
Krt8	0.000284251	0.76156	0.908	0.818	0.00182259
Tmem150a	1.19e-08	0.758466	0.724	0.512	2.58e-07
Fcgrt	9.77e-10	0.756367	0.724	0.179	2.7e-08
Cox5b	1.48e-21	0.75628	1	0.991	3.77e-19
Dek	8.49e-13	0.755981	0.862	0.878	4.56e-11
Rcn1	1.45e-16	0.755641	0.851	0.664	1.54e-14
Fstl1	3.01e-06	0.754325	0.655	0.369	3.59e-05
Tes	9.18e-13	0.752721	0.747	0.399	4.87e-11
Nsdhl	2.68e-20	0.751725	0.724	0.327	5.12e-18
Hmgb3	9.62e-17	0.751643	0.954	0.783	1.08e-14
Mettl7b	8.52e-05	0.751205	0.414	0.068	0.000656911
Fabp5	0.0139081	0.751007	0.839	0.455	0.0476467
Ldlr	6.12e-07	0.750579	0.46	0.125	8.64e-06
Pbx1	1.15e-08	0.749963	0.77	0.673	2.5e-07
Pebp1	1.04e-33	0.747368	0.989	0.997	2.66e-30
Erh	1.19e-21	0.743802	0.954	0.833	3.12e-19
Cald1	3.79e-05	0.742879	0.448	0.265	0.000320349
Pkdcc	3.38e-08	0.739025	0.713	0.351	6.48e-07
Dhfr	1.17e-14	0.736308	0.793	0.503	8.77e-13
Chd4	2.32e-14	0.736017	0.977	0.893	1.62e-12
Ttr	NA	0.734235	0.207	0.107	NA
Ndufa5	2.45e-17	0.734166	0.966	0.917	3.02e-15
Lsp1	1.44e-05	0.733965	0.621	0.333	0.000139386
Mdh1	6.82e-11	0.731724	1	0.994	2.38e-09
Sqle	6.45e-09	0.7312	0.644	0.381	1.49e-07
Timp3	7.8e-07	0.730988	0.667	0.375	1.08e-05
Cpox	1.84e-14	0.72956	0.897	0.604	1.3e-12
Hmgb1	1.64e-13	0.729453	1	0.997	9.92e-12
Pcsk9	9.39e-09	0.728673	0.621	0.068	2.09e-07
Atp5g3	2.79e-15	0.727832	0.989	0.988	2.54e-13
Acsl3	5.26e-14	0.727554	0.678	0.336	3.59e-12
Cdca3	0.000150871	0.726733	0.368	0.149	0.00106868
Dut	9.6e-12	0.726401	0.782	0.521	4.03e-10
Wt1	0.000163896	0.726167	0.322	0.179	0.00114502
Uba52	6.54e-36	0.7261	0.989	0.973	2.5e-32
Gpx4	3.21e-11	0.725057	1	0.979	1.22e-09
Xpnpep2	5.25e-07	0.722357	0.724	0.256	7.57e-06
Sptbn1	1.1e-10	0.722222	0.943	0.839	3.72e-09
Paqr9	1.72e-05	0.721907	0.471	0.074	0.000163777
Gas6	3.88e-06	0.719425	0.483	0.113	4.46e-05
Eif3j1	2.9e-15	0.718242	0.885	0.637	2.61e-13
Dbi	1.6e-08	0.718173	0.977	0.997	3.33e-07
Ihh	0.000124133	0.717775	0.402	0.077	0.000905293
Slc9a3r2	2.93e-09	0.714734	0.54	0.271	7.22e-08
Cldn2	9.12e-05	0.713936	0.793	0.42	0.000695668
Tspan3	1.35e-20	0.713383	0.966	0.866	2.79e-18
Anxa6	2.81e-10	0.708875	0.552	0.182	8.63e-09
Slc7a12	0.0781669	0.707078	0.356	0.149	0.182589
Tuba1b	6.48e-10	0.706877	0.92	0.875	1.85e-08
Sox11	1.24e-06	0.706374	0.575	0.265	1.62e-05
Cldn5	0.0142757	0.706374	0.253	0.101	0.0485878
Tmbim4	3.96e-11	0.704238	0.989	0.923	1.45e-09
Nt5dc2	7.51e-15	0.704155	0.897	0.774	5.91e-13
Ncam1	2.48e-08	0.703019	0.874	0.595	4.92e-07
Crip2	1.73e-05	0.701731	0.494	0.179	0.00016447
Oaz1	6.88e-26	0.700789	0.989	0.994	3.51e-23
Apom	0.00829286	0.700181	0.586	0.369	0.0313774
Ccna2	0.00161792	0.698465	0.31	0.092	0.0080033
Tyms	7.99e-12	0.698236	0.655	0.399	3.47e-10
mt-Nd1	7.28e-14	0.69529	1	1	4.8e-12
Atp5k	6.51e-18	0.694626	1	0.991	8.89e-16
Slc9a3r1	2.27e-12	0.694454	0.966	0.932	1.08e-10
0610005C13Rik	5.7e-10	0.692929	0.954	0.833	1.65e-08
Cldn6	9e-07	0.692115	0.885	0.732	1.23e-05
Atp5o.1	3.6e-19	0.690994	0.989	0.991	5.99e-17
Slc6a8	3.99e-15	0.690712	0.678	0.324	3.42e-13
Hist1h2ae	1.98e-06	0.687688	0.437	0.357	2.49e-05
Eaf2	1.52e-13	0.686876	0.736	0.315	9.43e-12
Uqcr11	2.01e-20	0.684674	0.989	0.982	3.94e-18
Ptprf	2.04e-12	0.683041	0.851	0.619	9.85e-11
Bex4	2.65e-09	0.682243	0.644	0.31	6.59e-08
Ankrd11	2.38e-12	0.681639	0.931	0.875	1.13e-10
Slc25a17	3.35e-15	0.681096	0.885	0.747	2.91e-13
Sec61b	1.4e-12	0.681087	0.977	0.979	7.21e-11
Ugt2b5	0.0460628	0.678999	0.276	0.036	0.122115
P4hb	2.73e-10	0.678901	0.931	0.926	8.41e-09
Cenpe	0.000165463	0.678628	0.368	0.137	0.00115386
mt-Cytb	3.43e-11	0.676975	1	1	1.3e-09
Chchd7	1.3e-14	0.675716	0.897	0.735	9.56e-13
H2afv	1.4e-06	0.67348	0.92	0.949	1.82e-05
Got1	5.09e-15	0.673441	0.793	0.324	4.14e-13
Slc22a12	4.79e-05	0.672602	0.586	0.268	0.000396232
Itgb6	0.0002793	0.67215	0.644	0.5	0.00179839
Rbm3	1.67e-12	0.670251	0.977	0.958	8.36e-11
Acsl1	6.26e-08	0.66987	0.747	0.396	1.14e-06
Glyat	2.11e-07	0.669517	0.816	0.384	3.36e-06
Fgfr1	7.12e-10	0.668616	0.598	0.229	2.01e-08
Col18a1	1.29e-07	0.666892	0.943	0.78	2.15e-06
Slc25a4	2.18e-17	0.666273	0.989	0.994	2.78e-15
Glrx	9.23e-11	0.665868	0.655	0.265	3.16e-09
Sardh	2.51e-07	0.665458	0.816	0.393	3.92e-06
Slc22a1	3.69e-06	0.662571	0.563	0.158	4.31e-05
Nectin3	1.37e-09	0.661571	0.724	0.33	3.6e-08
Tacc3	9.65e-05	0.660663	0.414	0.107	0.000730262
Speg	3.81e-08	0.660623	0.575	0.113	7.25e-07
Pycrl	2.89e-16	0.659397	0.851	0.619	2.94e-14
Rnf128	2.36e-06	0.658056	0.586	0.271	2.9e-05
Fut9	0.00023573	0.658056	0.897	0.887	0.00154917
C1qtnf12	1.31e-10	0.656768	0.816	0.604	4.35e-09
Slc7a9	4.69e-08	0.655992	0.644	0.226	8.83e-07
Srebf2	1.51e-12	0.654541	0.713	0.438	7.64e-11
Gmnn	2.08e-10	0.654048	0.621	0.289	6.63e-09
Rcn3	1.16e-09	0.653791	0.563	0.235	3.14e-08
Nr2f2	4.11e-09	0.653428	0.897	0.735	9.86e-08
Tpx2	0.00507976	0.652888	0.356	0.062	0.0210431
Ptov1	3.6e-16	0.652861	0.977	0.955	3.57e-14
Tcn2	2.03e-06	0.652199	0.874	0.774	2.53e-05
Ubald2	1.39e-09	0.652026	0.897	0.747	3.64e-08
Calm2	1.23e-07	0.651531	0.931	0.955	2.07e-06
Mvd	4.4e-11	0.650757	0.701	0.387	1.59e-09
Smarca2	1.83e-07	0.649261	0.667	0.36	2.95e-06
Coq7	2.83e-14	0.647424	0.862	0.717	1.96e-12
Maf	0.00918036	0.647291	0.874	0.649	0.0341272
Fxyd6	0.000839045	0.647006	0.391	0.152	0.00456753
Golim4	2.59e-09	0.643534	0.782	0.571	6.48e-08
Slc3a2	5.98e-10	0.64292	0.885	0.667	1.72e-08
Sec61a1	3.67e-11	0.641867	0.793	0.571	1.37e-09
Gm10076	3.06e-15	0.641746	0.908	0.938	2.69e-13
Snrpg	1.66e-15	0.639988	0.931	0.949	1.55e-13
Cox7c	1.21e-12	0.639351	1	0.994	6.29e-11
Gm17750	4.03e-11	0.637342	0.621	0.211	1.47e-09
Gnb2	1.25e-10	0.637149	0.954	0.964	4.16e-09
Tsc22d1	2.1e-06	0.636756	0.943	0.887	2.61e-05
Myl9	NA	0.63655	0.437	0.173	NA
Siva1	1.07e-08	0.636166	0.897	0.798	2.35e-07
Ctnnb1	1.55e-13	0.636146	0.92	0.92	9.55e-12
Cdk2ap2	1.69e-10	0.635633	0.828	0.696	5.46e-09
Lamc1	1.14e-09	0.635583	0.759	0.574	3.11e-08
Cnot6	2.58e-13	0.634408	0.92	0.661	1.5e-11
Srsf3	9.13e-15	0.633412	0.989	0.979	6.98e-13
Glrx5	4.07e-15	0.631408	0.966	0.872	3.42e-13
Iqgap1	1.68e-08	0.631275	0.759	0.521	3.44e-07
Snrpf	2.23e-13	0.629685	0.966	0.943	1.32e-11
Zfyve21	3.67e-08	0.629184	0.839	0.717	6.99e-07
mt-Nd3	2.02e-12	0.628968	1	0.991	9.83e-11
Usp2	2.61e-07	0.627775	0.701	0.464	4.06e-06
Sfpq	1.41e-08	0.627284	0.92	0.914	2.94e-07
Mep1a	0.0165086	0.626584	0.874	0.783	0.0543389
Mrpl12	2.42e-10	0.626467	0.943	0.938	7.55e-09
Kcnq1ot1	1.21e-05	0.624363	0.92	0.872	0.000120115
Ndufb8	8.97e-09	0.623825	0.977	0.994	2.02e-07
Svil	1.38e-10	0.623654	0.782	0.423	4.55e-09
Fth1	9.47e-08	0.623528	1	1	1.63e-06
Krt18	0.000121846	0.623384	0.828	0.512	0.000891169
Arl2bp	5.57e-15	0.622703	0.77	0.396	4.48e-13
Mapt	0.000141617	0.622429	0.437	0.125	0.00101157
Cdhr5	1.3e-05	0.621951	0.529	0.128	0.000127765
Tmem14c	4.14e-12	0.621849	0.897	0.812	1.89e-10
Fkbp4	3.06e-15	0.620898	0.977	0.967	2.69e-13
Nasp	5.61e-09	0.620591	0.839	0.774	1.31e-07
Hmmr	0.11046	0.619695	0.23	0.042	0.236483
mt-Nd4	1.15e-10	0.618726	1	1	3.87e-09
Msmo1	1.13e-09	0.618465	0.69	0.348	3.1e-08
Lrpap1	2.3e-05	0.617697	0.977	0.967	0.000209461
Stip1	1.12e-13	0.616671	0.897	0.741	7.08e-12
Zfp503	4.69e-06	0.615833	0.713	0.565	5.26e-05
Abracl	1.03e-10	0.614782	0.908	0.795	3.49e-09
Hmgn1	2.05e-17	0.612957	1	0.991	2.65e-15
Arpc1b	2.5e-08	0.612874	0.782	0.589	4.92e-07
Tysnd1	1.4e-13	0.612831	0.736	0.491	8.78e-12
Maged1	9.25e-11	0.610251	0.954	0.899	3.16e-09
Ifitm3	NA	0.609879	0.379	0.256	NA
L3hypdh	5.36e-12	0.609616	0.736	0.399	2.37e-10
Bend5	1.46e-12	0.609266	0.747	0.244	7.46e-11
Clic6	0.000146209	0.608699	0.54	0.042	0.00104145
Srsf7	4.55e-12	0.608166	0.908	0.836	2.06e-10
1810058I24Rik	1.87e-08	0.608077	0.92	0.908	3.81e-07
Hsp90b1	1.18e-06	0.60762	1	0.994	1.56e-05
Mcm3	4.23e-06	0.60747	0.46	0.164	4.83e-05
Ctdsp2	9.38e-12	0.607136	0.736	0.616	3.96e-10
Emp1	0.000597346	0.607053	0.448	0.068	0.00341986
Srsf2	7.58e-15	0.607037	0.989	0.949	5.91e-13
Slc7a13	0.0046617	0.606842	0.54	0.307	0.0195981
Hspa5	1.05e-05	0.606429	0.989	0.994	0.000106128
Defb19	0.0021818	0.604896	0.322	0.057	0.0102868
Rnf208	1.65e-09	0.604492	0.54	0.247	4.27e-08
Cox6c	5.66e-13	0.60395	1	0.997	3.14e-11
Uqcr10	1e-09	0.603444	1	0.994	2.77e-08
Prc1	0.0186521	0.602062	0.23	0.131	0.0597979
Plk1	0.105406	0.600897	0.218	0.051	0.229129
Tecr	4.88e-13	0.600188	0.989	0.994	2.78e-11
Alyref	3.16e-11	0.600037	0.874	0.759	1.21e-09
Smc3	4.81e-12	0.599984	0.931	0.884	2.15e-10
Cnn3	1.13e-07	0.599407	0.667	0.449	1.93e-06
Spc24	0.000700653	0.599215	0.437	0.321	0.00391454
Snrpb	5.91e-15	0.598897	0.943	0.955	4.71e-13
Nit2	4.12e-09	0.598146	0.897	0.768	9.86e-08
Usmg5	1.61e-09	0.598075	0.989	0.97	4.18e-08
Ppia	5e-15	0.597958	0.989	0.997	4.11e-13
Mfap2	0.00521946	0.597749	0.276	0.092	0.0215045
Flna	1.23e-06	0.597668	0.529	0.295	1.61e-05
Cep164	1.57e-13	0.597641	0.759	0.485	9.58e-12
Pdzk1ip1	0.00549404	0.596219	0.793	0.643	0.0223475
Jup	1.54e-09	0.595752	0.701	0.467	4.02e-08
Actb	2.99e-05	0.594149	0.989	1	0.000262417
Folr1	0.000159617	0.593671	0.966	0.744	0.00112231
Ssr2	5.35e-12	0.59361	0.977	0.976	2.37e-10
Egfl7	4.78e-08	0.593517	0.77	0.527	8.97e-07
Nudt4	4.81e-08	0.592992	0.828	0.577	9.02e-07
Gng11	9.33e-05	0.592673	0.391	0.143	0.000708739
Cdkn1a	0.005139	0.592604	0.793	0.58	0.0212425
Cks1b	1.1e-07	0.592517	0.747	0.661	1.88e-06
Qdpr	4.03e-09	0.59247	0.92	0.866	9.71e-08
Nrep	5.24e-07	0.59216	0.747	0.565	7.57e-06
Cluh	2.97e-11	0.592098	0.678	0.458	1.15e-09
Sec61g	9.09e-12	0.591556	0.977	0.991	3.87e-10
Galnt11	0.00169162	0.59131	0.874	0.699	0.00829318
Ascc1	1.01e-06	0.59069	0.897	0.795	1.36e-05
Mgst3	2.83e-06	0.589864	0.701	0.536	3.41e-05
Ciapin1	1.38e-10	0.588879	0.782	0.634	4.56e-09
Atp2b1	0.00353206	0.585848	0.954	0.932	0.0154348
Pgp	3.47e-12	0.585735	0.667	0.432	1.64e-10
Pabpn1	8.03e-08	0.58552	0.862	0.732	1.42e-06
Fitm1	0.00125795	0.584952	0.402	0.083	0.00643972
Ctxn1	1.19e-07	0.584297	0.747	0.435	2.01e-06
Mrpl4	4.13e-11	0.583948	0.862	0.679	1.5e-09
Efnb1	1.99e-06	0.583807	0.609	0.354	2.49e-05
2022-09-11	1.29e-07	0.58358	0.701	0.435	2.15e-06
Idh2	8.18e-12	0.583292	0.954	0.955	3.53e-10
Ccnb1	0.000328974	0.582203	0.379	0.125	0.00207455
Socs2	0.00192501	0.581488	0.724	0.524	0.00925917
Knstrn	7.41e-06	0.581363	0.425	0.223	7.87e-05
Racgap1	0.00293716	0.580669	0.356	0.086	0.0131896
Slc17a1	0.00160291	0.580164	0.368	0.086	0.00793976
Marcksl1	3.48e-07	0.580113	0.897	0.854	5.26e-06
Rorc	3.72e-06	0.579987	0.621	0.271	4.33e-05
Zmynd8	3.07e-11	0.579547	0.69	0.378	1.18e-09
Galnt14	4.27e-09	0.579477	0.759	0.378	1.02e-07
Tns1	6.76e-07	0.579113	0.678	0.42	9.46e-06
Gm19950	0.0169083	0.578987	0.839	0.583	0.055299
Cyc1	1.25e-08	0.577749	0.966	0.97	2.67e-07
Slc4a4	0.00116055	0.577229	0.747	0.509	0.00602995
Trabd2b	4.16e-05	0.577149	0.609	0.363	0.000348848
Ndufa1	5.35e-10	0.575944	0.885	0.818	1.56e-08
Sdhb	3.64e-07	0.575257	0.908	0.908	5.47e-06
Ran	4.36e-10	0.574726	0.977	0.985	1.29e-08
Tra2b	1.24e-10	0.573778	0.931	0.83	4.16e-09
Hnrnpa3	9.16e-09	0.573144	0.989	0.976	2.05e-07
Shmt2	6.33e-09	0.571944	0.701	0.485	1.47e-07
Tmem258	9.08e-11	0.571288	0.954	0.94	3.13e-09
Pdia6	2.25e-09	0.570684	1	0.991	5.7e-08
Rfc4	1.68e-11	0.570682	0.632	0.357	6.77e-10
Uhrf2	5.39e-07	0.570519	0.713	0.542	7.72e-06
Dynll1	2.43e-06	0.570478	0.989	0.997	2.97e-05
Brd3	3.59e-10	0.570328	0.839	0.619	1.08e-08
Cox5a	8.47e-08	0.569892	1	0.997	1.48e-06
Aadat	0.189955	0.569348	0.759	0.696	0.352727
Esrra	9.42e-09	0.569328	0.563	0.182	2.09e-07
Thoc7	6.01e-11	0.5689	0.943	0.929	2.12e-09
Igf2bp1	9.01e-11	0.568619	0.805	0.58	3.12e-09
2010107E04Rik	2.14e-09	0.568099	1	0.97	5.42e-08
Slc22a8	0.00304479	0.567202	0.368	0.104	0.0135931
Zeb2	2.91e-06	0.565515	0.621	0.378	3.48e-05
Actn4	2.91e-07	0.56517	0.885	0.783	4.48e-06
Rps2	3.96e-30	0.563452	1	1	6.06e-27
BC025446	5.2e-10	0.562746	0.655	0.262	1.52e-08
Cox8a	1.5e-07	0.56232	0.977	0.997	2.46e-06
Usp7	3.65e-09	0.561753	0.759	0.717	8.88e-08
Ubb	1.27e-09	0.560392	1	0.997	3.41e-08
Thra	2.49e-08	0.559035	0.678	0.438	4.92e-07
Agrn	9.89e-05	0.559035	0.931	0.812	0.000747252
Plekha1	2.12e-10	0.55857	0.667	0.369	6.72e-09
Rab21	1.14e-08	0.558029	0.874	0.735	2.48e-07
Fasn	5.26e-07	0.557688	0.621	0.372	7.57e-06
Uqcc2	1.57e-07	0.55742	0.966	0.914	2.56e-06
Klc4	1.16e-08	0.55729	0.816	0.616	2.52e-07
Fabp3	0.0408337	0.557138	0.747	0.583	0.111144
Cycs	4.92e-05	0.555598	0.908	0.795	0.000403393
Peg3	0.00738837	0.555363	0.575	0.384	0.0285004
Pycard	2.71e-08	0.555352	0.644	0.363	5.27e-07
Mpst	3.17e-06	0.5548	0.862	0.792	3.76e-05
Banf1	2.94e-10	0.553483	0.885	0.899	8.99e-09
Pls3	2.58e-07	0.552942	0.517	0.232	4.01e-06
Arf5	3.41e-10	0.55252	0.989	0.973	1.03e-08
Ywhaz	1.81e-06	0.552347	0.966	0.935	2.29e-05
Dnajc15	2.81e-09	0.552304	0.943	0.836	6.94e-08
Pih1d1	1.83e-10	0.552018	0.805	0.56	5.87e-09
Hadh	2.85e-11	0.551311	0.989	0.92	1.11e-09
Tpm1	4.61e-05	0.550731	0.874	0.744	0.000383014
Fuom	9.23e-07	0.550582	0.655	0.411	1.26e-05
Cyb5a	2.65e-05	0.549614	0.989	0.973	0.000237312
Tpm2	4.8e-05	0.549422	0.391	0.262	0.000396232
Sms	9.14e-08	0.548189	0.747	0.506	1.58e-06
Sod1	2.77e-07	0.548119	0.77	0.577	4.27e-06
Dlk1	NA	0.548055	0.322	0.077	NA
Phb	1.41e-10	0.547325	0.92	0.866	4.61e-09
Prrc2a	5.65e-09	0.546397	0.816	0.696	1.32e-07
Smdt1	2.45e-07	0.546203	0.977	0.979	3.83e-06
Ddx5	1.3e-08	0.545717	0.989	0.991	2.75e-07
Chchd3	4.3e-10	0.545091	0.851	0.729	1.27e-08
Odc1	4.08e-10	0.544692	0.931	0.815	1.21e-08
Ece1	5.09e-09	0.54328	0.563	0.354	1.2e-07
Btd	1.58e-07	0.543163	0.759	0.527	2.57e-06
Gatm	NA	0.543041	0.368	0.149	NA
Pcbd1	1.25e-05	0.54264	0.966	0.982	0.000123393
Armc1	1.68e-10	0.542345	0.816	0.613	5.44e-09
Zdhhc9	4.26e-11	0.542224	0.69	0.384	1.54e-09
Atp5g1	6.85e-09	0.541438	1	0.997	1.58e-07
Hspd1	4.1e-12	0.54137	1	0.985	1.89e-10
Ptbp1	9.04e-09	0.541054	0.851	0.78	2.03e-07
Atp5j	2.53e-08	0.541018	1	0.997	4.95e-07
Rnf187	1.59e-09	0.540273	0.954	0.929	4.13e-08
Idh3a	1.31e-09	0.53996	0.851	0.699	3.48e-08
Ppp1ca	6.73e-10	0.53971	0.977	0.985	1.92e-08
Fkbp1a	8.27e-08	0.539697	0.931	0.929	1.46e-06
Chchd10	0.000129264	0.539608	0.989	0.97	0.000938235
Dlst	1.25e-08	0.538966	0.839	0.67	2.67e-07
Fbxo5	0.0382022	0.538935	0.253	0.083	0.105751
Ddost	4.28e-08	0.53846	0.954	0.955	8.11e-07
Cox6b1	2.22e-07	0.537866	0.989	0.985	3.52e-06
Vcan	0.000880186	0.537652	0.517	0.223	0.00476435
Rbpms	0.00227412	0.536978	0.931	0.708	0.0106759
Smc1a	2.29e-08	0.536826	0.874	0.872	4.59e-07
Mmp14	2.59e-06	0.53676	0.552	0.265	3.13e-05
Meg3	0.0160983	0.536695	0.356	0.17	0.0534025
Tinagl1	0.000777685	0.536166	0.529	0.31	0.00427601
Hnrnpd	1.79e-09	0.535947	0.966	0.949	4.6e-08
Ap2m1	2.43e-07	0.535908	0.931	0.908	3.81e-06
Rrbp1	6.98e-06	0.535742	0.977	0.967	7.49e-05
Atp5c1	3.57e-12	0.535037	0.977	0.991	1.66e-10
Snrpc	4.19e-09	0.534711	0.874	0.851	1e-07
Lsm5	9.23e-09	0.53465	0.793	0.652	2.06e-07
Mrpl42	1.23e-08	0.534644	0.943	0.955	2.64e-07
Dhx9	9.11e-09	0.534262	0.862	0.717	2.04e-07
Hnrnpa1	7.96e-08	0.533531	0.989	0.979	1.41e-06
Podxl	0.116281	0.533438	0.161	0.089	0.245514
Dap	0.0003887	0.532764	0.874	0.777	0.00239583
Elovl1	5.21e-07	0.532701	0.747	0.548	7.55e-06
Mpped2	2.16e-05	0.532668	0.667	0.417	0.000198763
Ctsb	1.05e-05	0.532092	0.897	0.839	0.000106524
Pnkd	8.21e-07	0.53163	0.943	0.836	1.13e-05
Idi1	7.87e-06	0.531572	0.667	0.399	8.32e-05
Tardbp	6.23e-07	0.531493	0.885	0.771	8.78e-06
Mfap4	0.00320281	0.531164	0.333	0.113	0.0141489
Ptprd	0.000341959	0.531107	0.448	0.131	0.00214757
Mat2a	5.46e-06	0.530914	0.897	0.842	6.02e-05
Frmd4a	5.12e-08	0.530794	0.609	0.268	9.54e-07
Lsm3	2.52e-08	0.530459	0.793	0.604	4.94e-07
Rtl8a	1.67e-05	0.530016	0.414	0.25	0.000159235
Uqcrc1	1.7e-07	0.529999	0.977	0.973	2.75e-06
Hnrnpm	1.22e-08	0.529956	0.954	0.938	2.63e-07
Txndc17	8.19e-09	0.529704	0.977	0.979	1.86e-07
Dach1	2.49e-08	0.529491	0.793	0.583	4.92e-07
Gm14964	1.1e-06	0.529223	0.632	0.208	1.46e-05
Atox1	3.93e-07	0.529145	0.954	0.923	5.87e-06
Sema3c	0.00451348	0.528181	0.92	0.896	0.0191011
Cenpw	0.000518768	0.528003	0.345	0.232	0.00303127
Mcm5	0.000189291	0.527751	0.391	0.185	0.00129289
Pmf1	1.32e-09	0.527028	0.552	0.378	3.5e-08
Ptges3	1e-08	0.52648	0.943	0.878	2.21e-07
Sub1	5.87e-11	0.526435	1	0.988	2.08e-09
Maged2	3.26e-05	0.525855	0.908	0.893	0.000282227
Lpp	1.91e-05	0.525745	0.816	0.726	0.00017814
Cxxc5	1.67e-05	0.52555	0.862	0.69	0.000159235
Sema3b	3.39e-06	0.525159	0.494	0.208	4e-05
Atp5b	1.29e-09	0.52475	0.989	0.997	3.45e-08
Ahnak	0.00142622	0.52421	0.448	0.182	0.00720464
Mrpl18	1.68e-08	0.524088	0.954	0.932	3.44e-07
Ssrp1	1.23e-08	0.523868	0.92	0.851	2.64e-07
Exosc8	2.47e-09	0.523825	0.713	0.488	6.2e-08
Map7	4.61e-07	0.523626	0.713	0.512	6.74e-06
Tomm5	2.62e-07	0.523225	0.92	0.908	4.07e-06
Ddx6	1.41e-07	0.523196	0.793	0.622	2.33e-06
Dhx15	7.47e-08	0.523183	0.862	0.78	1.33e-06
Psip1	6.36e-06	0.5227	0.816	0.735	6.89e-05
Snrpe	3.59e-11	0.52214	0.943	0.982	1.35e-09
Aadac	0.000840275	0.521991	0.701	0.357	0.00457098
Bphl	2.01e-05	0.521634	0.908	0.884	0.000186506
Aldh4a1	9.63e-06	0.52148	0.701	0.506	9.87e-05
Cdca7	5.33e-07	0.520725	0.506	0.214	7.66e-06
Wnt4	NA	0.520323	0.23	0.128	NA
Elovl7	1.08e-06	0.520232	0.69	0.393	1.44e-05
Glyctk	7.95e-06	0.520166	0.529	0.161	8.37e-05
Gpm6a	0.000450584	0.519848	0.655	0.452	0.00269825
Raly	1.26e-08	0.519602	0.908	0.854	2.68e-07
Snx6	1.7e-06	0.519219	0.977	0.955	2.16e-05
Slc25a3	7.07e-14	0.518896	1	0.997	4.7e-12
Med28	2.18e-05	0.518511	0.908	0.869	0.000199821
Helz	6.06e-06	0.518174	0.782	0.682	6.57e-05
Vcp	1.32e-09	0.518014	0.977	0.985	3.5e-08
Ctnnbip1	8.57e-09	0.51799	0.816	0.515	1.94e-07
Cnih4	3.95e-07	0.517137	0.851	0.738	5.88e-06
Akt1	5.42e-09	0.516892	0.77	0.607	1.27e-07
Eif4g1	0.000102025	0.516767	0.943	0.875	0.000765408
Nucks1	7.29e-06	0.516734	0.954	0.938	7.78e-05
Dazap1	7.88e-07	0.516572	0.931	0.81	1.09e-05
Wdfy1	7.74e-08	0.516492	0.609	0.315	1.37e-06
Ccnd2	0.0178533	0.516195	0.402	0.259	0.0577405
Sh3bgrl3	3.05e-05	0.516071	0.885	0.81	0.000266648
Cyb5r3	7.75e-06	0.515819	0.782	0.735	8.2e-05
Epha4	0.00667288	0.515334	0.299	0.134	0.0261275
Atp5h	1.94e-08	0.514915	1	0.994	3.94e-07
Hnrnpa2b1	4.24e-06	0.514214	0.977	0.991	4.83e-05
Tcf3	1.1e-08	0.513856	0.816	0.577	2.4e-07
Atp5a1	3.65e-11	0.51272	1	1	1.37e-09
Slc17a3	0.00135992	0.512708	0.425	0.08	0.00689707
Cox7a2	1.42e-05	0.512587	0.977	0.997	0.000138324
Gpc3	4.77e-05	0.51241	0.943	0.807	0.000394946
Unc5cl	0.0154418	0.512344	0.414	0.036	0.0516732
Spc25	0.0118774	0.512015	0.632	0.423	0.0418337
Canx	8.43e-06	0.511778	0.954	0.955	8.81e-05
Rangap1	1.17e-07	0.511258	0.632	0.408	1.99e-06
Nisch	3.53e-06	0.511214	0.943	0.902	4.14e-05
Srsf6	1.28e-08	0.511099	0.954	0.884	2.71e-07
Fubp1	5.57e-06	0.511016	0.874	0.866	6.13e-05
Prelid2	2.73e-05	0.510972	0.759	0.479	0.00024375
Aco2	0.000100248	0.510886	0.943	0.952	0.000754133
Rnf181	1.22e-05	0.510685	0.77	0.497	0.000121184
Fam117b	2.37e-10	0.51042	0.621	0.274	7.44e-09
Hells	0.00103674	0.510003	0.322	0.161	0.00547223
Ndufs4	2.62e-09	0.509814	0.931	0.899	6.54e-08
Fahd1	1.62e-06	0.509096	0.908	0.857	2.08e-05
Dad1	6.89e-07	0.509034	0.977	0.976	9.63e-06
Dsp	3.32e-05	0.508822	0.552	0.342	0.000286188
Nfib	0.0102329	0.508801	0.632	0.634	0.0370683
Sumo3	8.86e-08	0.508594	0.851	0.741	1.54e-06
Msra	2.25e-07	0.508581	0.655	0.438	3.55e-06
Myh10	0.000177824	0.507895	0.598	0.443	0.00122237
Hes6	7.89e-07	0.507722	0.69	0.315	1.09e-05
Ndufa8	4.35e-06	0.507571	0.943	0.97	4.94e-05
Minos1	3.11e-06	0.507233	0.966	0.961	3.7e-05
Hnrnpu	7.76e-07	0.507079	0.966	0.97	1.08e-05
Rbbp4	7.4e-08	0.506538	0.897	0.812	1.33e-06
Snrpd1	6.37e-08	0.505934	0.943	0.938	1.16e-06
Ilf2	1.82e-07	0.505817	0.839	0.693	2.93e-06
Fam13a	2.18e-06	0.505558	0.517	0.146	2.69e-05
Gtf2i	1.05e-06	0.505451	0.931	0.884	1.41e-05
Adamts9	1.29e-05	0.504451	0.69	0.446	0.000126644
Dnajc19	0.000102048	0.503905	0.92	0.869	0.000765408
Ndufb9	2.68e-07	0.503199	0.966	0.994	4.14e-06
Mrps24	2.27e-07	0.503169	0.92	0.955	3.57e-06
Tcf4	3.21e-05	0.502927	0.632	0.515	0.000278707
Cdk4	5.7e-08	0.502714	0.943	0.979	1.06e-06
Col4a1	0.00288676	0.502677	1	0.976	0.0130052
Zbtb20	0.00100599	0.502519	0.621	0.515	0.00535056
Rab4a	3.08e-07	0.502283	0.713	0.5	4.72e-06
Mrps25	1.49e-07	0.501727	0.885	0.756	2.46e-06
Atp5j2	6.57e-08	0.501339	0.989	0.997	1.19e-06
mt-Co2	1.14e-06	0.501296	1	0.997	1.5e-05
Cdkl1	0.000382619	0.501009	0.425	0.205	0.00236407
Grhpr	3.67e-06	0.49965	0.931	0.935	4.29e-05
2610528J11Rik	0.000342865	0.499126	0.747	0.518	0.00215149
Sap18	1.56e-07	0.498905	0.908	0.821	2.56e-06
Nrp1	0.00156	0.498141	0.391	0.131	0.00777256
Gnb1	1e-05	0.497816	0.885	0.86	0.000102392
Ezh2	8.63e-07	0.497216	0.667	0.589	1.18e-05
Arpc2	4.85e-06	0.497139	0.954	0.955	5.38e-05
Ptbp3	0.00521781	0.496888	0.828	0.732	0.0215045
Mrps36	1.59e-06	0.496828	0.931	0.839	2.04e-05
Adam15	1.97e-05	0.496788	0.483	0.199	0.000183701
Ndufc1	1.39e-06	0.496511	1	0.97	1.81e-05
Arhgdia	5.98e-05	0.496361	0.908	0.905	0.000478715
Cd9	9.31e-05	0.496213	0.655	0.292	0.000708317
Mfge8	4.66e-06	0.49592	0.563	0.235	5.23e-05
Dld	2.39e-07	0.495475	0.862	0.783	3.75e-06
G3bp1	1.05e-08	0.49547	0.954	0.926	2.31e-07
Crip1	3.89e-05	0.495434	0.851	0.753	0.000328155
Mfsd1	0.000100122	0.495273	0.874	0.699	0.000753922
Tma7	8.8e-08	0.494842	0.977	0.985	1.53e-06
Col4a2	0.0172188	0.494837	0.966	0.845	0.0560492
Ppil1	6.87e-08	0.494603	0.77	0.658	1.24e-06
Tmco3	2.67e-09	0.494471	0.609	0.36	6.63e-08
Kdelr2	1.23e-07	0.494185	0.816	0.717	2.07e-06
Rpn1	4.97e-05	0.493651	0.954	0.875	0.000406192
Hnrnpab	3.59e-07	0.492963	0.943	0.976	5.4e-06
Ppih	3.2e-08	0.492806	0.655	0.518	6.17e-07
Tmem229a	0.00233862	0.49269	0.759	0.61	0.0109188
Tfrc	3.75e-06	0.492541	0.678	0.324	4.34e-05
Rbpms2	1.87e-07	0.491972	0.667	0.408	3e-06
Vdac3	2.63e-08	0.491526	0.954	0.926	5.14e-07
Traf4	2.28e-06	0.491117	0.816	0.652	2.81e-05
Mgat4b	1.12e-05	0.491117	0.77	0.655	0.000113418
Ndufc2	1.63e-08	0.491099	0.977	0.97	3.36e-07
Rad21	2.27e-05	0.49072	0.839	0.771	0.000207359
Ninj1	6.41e-05	0.490449	0.747	0.676	0.000506058
Frzb	0.000441602	0.490311	0.46	0.11	0.00265761
Suclg1	1.99e-07	0.489908	0.954	0.982	3.2e-06
Cryl1	2.61e-05	0.489884	0.506	0.149	0.000234205
Akr1b3	2.42e-06	0.48965	0.494	0.268	2.96e-05
Sh3bp5	1.9e-06	0.489516	0.621	0.271	2.39e-05
Cdh6	4.82e-05	0.489113	0.943	0.905	0.000397766
Ndufa10	8.65e-08	0.489104	0.931	0.955	1.51e-06
Crtap	2.57e-06	0.488885	0.644	0.423	3.11e-05
Atp5e	3.44e-07	0.488792	0.989	0.997	5.2e-06
Tln1	1.22e-05	0.48819	0.828	0.804	0.000121124
Comt	1.65e-05	0.48797	0.862	0.753	0.000157893
Txnip	2.03e-05	0.487835	0.471	0.241	0.000188116
Emx2	4.73e-06	0.487522	0.77	0.565	5.29e-05
Lsm2	4.75e-06	0.486825	0.736	0.673	5.3e-05
Ndufb5	1.02e-07	0.486501	1	0.982	1.76e-06
Trim28	1.49e-06	0.48611	0.92	0.857	1.93e-05
Mrps12	3.36e-07	0.485174	0.851	0.815	5.11e-06
Tcaf1	2.14e-07	0.484612	0.747	0.5	3.4e-06
Hras	1.91e-06	0.484392	0.954	0.905	2.41e-05
Ugt2b34	0.165045	0.484103	0.218	0.021	0.318706
Prkacb	2.97e-08	0.483984	0.575	0.387	5.75e-07
mt-Co1	0.00240492	0.483925	1	1	0.0111737
Hdac6	2.15e-05	0.483786	0.621	0.423	0.000198098
mt-Atp6	9.54e-07	0.483711	1	1	1.3e-05
Rai14	1.45e-07	0.483702	0.632	0.292	2.39e-06
Snrnp40	2.25e-07	0.482527	0.805	0.679	3.55e-06
Dst	0.00534771	0.482244	0.782	0.67	0.0218921
Ppa1	3e-06	0.482097	0.92	0.747	3.58e-05
Nrarp	0.00433282	0.481965	0.356	0.11	0.0184592
Gpx8	5.35e-07	0.481068	0.759	0.402	7.67e-06
Hnf1b	0.00603652	0.481039	0.897	0.884	0.0241429
S100a10	0.0374721	0.480687	0.954	0.875	0.104145
Plat	0.277916	0.480681	0.115	0.068	0.463578
Far1	0.000119848	0.480444	0.747	0.649	0.000879923
Tomm70a	3.74e-06	0.48044	0.874	0.732	4.34e-05
Tpm4	0.00393936	0.48024	0.862	0.792	0.0169905
Pcolce	0.000824128	0.480235	0.414	0.134	0.00449915
Sat1	0.218626	0.480006	0.839	0.708	0.391325
Gja1	0.00013816	0.479687	0.425	0.146	0.000989648
Larp7	1.64e-06	0.479648	0.736	0.631	2.1e-05
Rps21	1.79e-22	0.479447	1	1	5.46e-20
Atp6ap2	3.84e-06	0.479177	0.862	0.735	4.43e-05
Smim4	1.42e-06	0.479151	0.851	0.667	1.84e-05
Sf3b5	1.31e-06	0.478904	0.931	0.938	1.71e-05
Prdx2	6.55e-09	0.478754	0.989	0.997	1.51e-07
Mgat2	4.54e-07	0.478715	0.885	0.723	6.67e-06
Carhsp1	3.78e-06	0.478715	0.54	0.286	4.37e-05
Abhd17b	2.01e-06	0.478601	0.759	0.494	2.51e-05
Lap3	2.01e-05	0.478418	0.897	0.872	0.000186626
Hist1h1e	0.000167134	0.478383	0.759	0.628	0.00116233
Homer2	8.75e-06	0.478188	0.517	0.161	9.07e-05
Wdr83os	8.68e-07	0.478097	0.885	0.804	1.19e-05
Ptms	0.000371947	0.477956	0.989	0.991	0.00230746
Hsd3b2	0.0267822	0.47793	0.379	0.039	0.0798037
Rrm1	2.22e-05	0.477873	0.437	0.268	0.000203843
Pcyt2	3.72e-06	0.477752	0.69	0.47	4.33e-05
Anapc11	3.27e-05	0.477076	0.759	0.732	0.000283244
Srek1ip1	6.35e-06	0.476888	0.897	0.854	6.88e-05
Ramp2	NA	0.476489	0.391	0.289	NA
Sec11a	4.59e-07	0.476181	0.977	0.935	6.74e-06
Ywhaq	1.02e-06	0.475973	0.966	0.946	1.38e-05
Xbp1	0.000113491	0.475734	0.839	0.714	0.000836465
Mcfd2	1.36e-07	0.475734	0.782	0.601	2.25e-06
Cited1	0.000971061	0.475734	0.425	0.155	0.00518646
Cenpb	0.000175185	0.47525	0.724	0.67	0.00120843
Pofut2	7.05e-08	0.475126	0.759	0.568	1.27e-06
mt-Nd2	3.31e-08	0.474965	1	1	6.37e-07
Slc25a30	1.48e-05	0.474937	0.517	0.327	0.000143309
Impad1	1.7e-06	0.474653	0.632	0.429	2.16e-05
Ak2	3.14e-06	0.47398	0.908	0.857	3.73e-05
Ttyh3	2.38e-06	0.473653	0.506	0.324	2.91e-05
Serpina10	NA	0.473581	0.138	0.08	NA
Strbp	1.06e-05	0.473292	0.874	0.765	0.000106935
mt-Co3	3.01e-07	0.47326	1	1	4.62e-06
1110008F13Rik	1.11e-06	0.472937	0.943	0.902	1.48e-05
Tmem174	0.0264126	0.472755	0.874	0.646	0.0788252
Ndufa3	4.53e-05	0.472602	0.977	0.952	0.000377193
Irak1bp1	9.87e-07	0.472521	0.655	0.396	1.34e-05
Csnk2b	1.29e-05	0.472407	0.931	0.917	0.00012696
Eif2s3y	4.02e-05	0.471843	0.494	0.152	0.000338509
Hebp1	0.000157293	0.471716	0.862	0.812	0.00110801
Tmem256	0.00067768	0.471585	0.954	0.943	0.00380008
Reep3	1.11e-07	0.471428	0.759	0.485	1.91e-06
Auh	7.33e-06	0.471408	0.828	0.676	7.81e-05
Nhs	0.000519159	0.471249	0.609	0.399	0.00303127
Aldh16a1	5.98e-08	0.471207	0.655	0.318	1.1e-06
Susd2	0.00674097	0.471099	0.575	0.464	0.0263671
Kif20b	0.029574	0.470999	0.287	0.104	0.0864044
Rogdi	5.01e-07	0.470984	0.529	0.196	7.28e-06
Cuedc2	4.63e-06	0.470652	0.908	0.854	5.22e-05
Gpx3	0.00877152	0.470645	0.54	0.265	0.0329115
Lig1	0.000440885	0.470489	0.46	0.265	0.00265539
Cib1	0.000107127	0.470287	0.954	0.887	0.000799582
Tnfrsf1a	3.16e-07	0.470069	0.609	0.408	4.83e-06
Ostc	3.87e-06	0.469915	0.92	0.967	4.45e-05
Myo9a	0.0011899	0.469655	0.793	0.592	0.00614073
H1f0	0.0469967	0.469518	0.908	0.896	0.124117
Pdxk	4.35e-06	0.469314	0.586	0.333	4.94e-05
Card19	1.85e-06	0.469262	0.644	0.443	2.34e-05
Myo15b	0.00428077	0.46924	0.621	0.393	0.018268
Pabpc1	1.55e-05	0.468941	0.989	0.985	0.000149277
Son	5.85e-07	0.468508	1	0.976	8.28e-06
Nav2	0.000161155	0.468299	0.575	0.217	0.00113001
Tomm7	4.47e-06	0.46781	0.943	0.976	5.05e-05
Ndufs2	5.52e-08	0.467288	0.966	0.985	1.02e-06
Aph1a	8.54e-06	0.467262	0.793	0.682	8.87e-05
Ndufb10	3.84e-06	0.467049	1	0.985	4.43e-05
Fah	0.0042473	0.466739	0.506	0.339	0.0181759
Mpzl2	1.21e-05	0.466661	0.529	0.238	0.000120597
Prpsap1	1.19e-06	0.466545	0.805	0.696	1.56e-05
Prlr	0.00189427	0.466388	0.437	0.277	0.00913896
Tcf7l2	4.65e-06	0.466165	0.563	0.438	5.22e-05
Ptp4a2	7.53e-05	0.466022	0.862	0.792	0.000587729
Ndufv1	5.58e-06	0.465854	0.931	0.938	6.13e-05
Dhcr7	1.23e-05	0.465611	0.494	0.193	0.000121554
Pgd	3.51e-07	0.465535	0.759	0.5	5.29e-06
Ppp2r1a	8.71e-05	0.465218	0.816	0.765	0.00066812
Emp3	0.0159826	0.464903	0.333	0.134	0.0531108
Dll1	0.0517386	0.464649	0.241	0.068	0.132831
Uqcrh	6.12e-08	0.464622	0.977	0.997	1.12e-06
Metrn	0.000477111	0.46427	0.46	0.125	0.0028246
Il10rb	9.7e-06	0.46424	0.529	0.19	9.92e-05
Tipin	7.1e-07	0.464149	0.655	0.435	9.9e-06
Pik3r1	2.76e-05	0.4639	0.46	0.244	0.000245304
Dcst1	0.00427951	0.4639	0.379	0.104	0.018268
Magt1	4.18e-05	0.463671	0.874	0.875	0.000349916
Celf1	3.53e-05	0.46358	0.839	0.732	0.000301752
Rtf1	1.89e-05	0.463319	0.931	0.902	0.000177375
Gdi2	7.92e-06	0.463268	0.977	0.955	8.36e-05
Stard8	0.00803572	0.463121	0.437	0.071	0.0305709
Creb3l2	8.99e-06	0.463109	0.632	0.342	9.28e-05
Ranbp1	1.96e-05	0.462886	0.943	0.955	0.000183107
Slc3a1	0.00604768	0.462564	0.483	0.265	0.0241655
Notch1	2.99e-05	0.462489	0.667	0.461	0.000262417
Dab2	0.0119775	0.462489	0.943	0.917	0.0421281
Fam20c	0.000179965	0.462473	0.517	0.31	0.00123472
Smarce1	9e-06	0.462145	0.862	0.851	9.28e-05
Tead2	6.78e-06	0.462049	0.644	0.432	7.29e-05
Dnaja1	2.13e-06	0.462008	0.989	0.988	2.63e-05
Mrps21	0.000146967	0.46198	0.897	0.949	0.00104587
Uqcrfs1	1.27e-05	0.461851	0.989	0.982	0.00012477
Pdhb	7.46e-05	0.461797	0.908	0.807	0.000582631
Calm1	0.00084187	0.461715	0.989	0.985	0.0045764
Iqgap2	0.00167808	0.461683	0.368	0.122	0.00824796
Nme1	1.17e-05	0.461653	0.954	0.964	0.000117052
Ugp2	6.1e-05	0.461161	0.874	0.723	0.000485634
Ghr	0.0112889	0.460913	0.77	0.696	0.0403373
S100a11	0.00323064	0.460841	0.885	0.851	0.0142316
Baz1b	0.000184429	0.460671	0.667	0.568	0.00126194
Bola3	1.7e-05	0.460561	0.839	0.75	0.000161983
Ace2	0.0224844	0.460446	0.621	0.533	0.0695878
Ppp1r14b	1.31e-05	0.460182	1	0.979	0.000128017
Smco4	3.37e-06	0.46012	0.632	0.44	3.99e-05
Tmem234	2.25e-05	0.459929	0.897	0.92	0.000205861
Mettl26	0.000135134	0.459903	0.931	0.917	0.000970705
Uchl3	2.88e-06	0.459337	0.897	0.717	3.46e-05
Ndufa12	8.09e-07	0.459163	0.989	0.976	1.11e-05
Mettl9	2.05e-05	0.459098	0.908	0.893	0.00018997
Hnrnpdl	2.03e-05	0.459031	0.874	0.812	0.000188083
Ndufb2	3.13e-05	0.458798	0.92	0.929	0.000273236
Gpx7	0.000967656	0.458501	0.414	0.14	0.00517913
Rrs1	1.67e-06	0.458223	0.655	0.345	2.14e-05
Cox6a1	0.000613845	0.458077	0.966	0.967	0.00349338
Fscn1	5.09e-06	0.457961	0.609	0.429	5.64e-05
Ppargc1a	0.000208265	0.457641	0.506	0.185	0.00139141
Uqcrq	0.00377714	0.457584	0.977	0.964	0.0163562
Jpt1	0.00446588	0.457537	0.885	0.86	0.0189416
Maf1	3.74e-06	0.457535	0.782	0.673	4.34e-05
Limd1	0.00142233	0.457522	0.736	0.649	0.00718971
Zc3h13	0.0008939	0.457206	0.816	0.824	0.00482151
Sdccag8	1.16e-07	0.457168	0.655	0.36	1.97e-06
Bclaf1	0.000241918	0.457165	0.92	0.887	0.00158167
Cxcl12	0.0049579	0.457122	0.356	0.14	0.020639
Pitpna	1.86e-05	0.457022	0.874	0.711	0.000174629
Gng5	0.000132533	0.456874	0.989	0.988	0.000957633
Kif22	0.0399985	0.45619	0.333	0.074	0.109377
Mafg	2.9e-05	0.456153	0.736	0.616	0.000255174
Nsmce2	9.89e-07	0.455966	0.77	0.598	1.34e-05
Spcs2	5.8e-07	0.455954	0.966	0.976	8.23e-06
A430005L14Rik	1.86e-07	0.455769	0.782	0.571	2.99e-06
mt-Nd4l	7.68e-06	0.455378	0.989	0.982	8.14e-05
Kras	0.0100653	0.455018	0.793	0.673	0.0365979
Cox7a1	0.0103805	0.45498	0.402	0.092	0.0375831
Jarid2	3.46e-05	0.454873	0.678	0.464	0.000297043
Creld2	0.000241765	0.454592	0.805	0.726	0.00158167
Zfp664	6.04e-06	0.454412	0.759	0.631	6.57e-05
P3h2	0.000117669	0.454192	0.54	0.28	0.000865588
Rab26os	2.46e-06	0.454089	0.517	0.238	3e-05
Ctcf	9.01e-06	0.454032	0.851	0.801	9.28e-05
Qprt	0.00115318	0.453979	0.828	0.664	0.00599573
Luc7l3	7.2e-05	0.453948	0.908	0.875	0.000563052
Snrpb2	0.000197576	0.453633	0.828	0.786	0.00133458
Zdhhc20	7.3e-07	0.453604	0.621	0.384	1.02e-05
Vegfb	3.39e-05	0.453261	0.828	0.688	0.0002923
Ssbp2	0.000114834	0.453261	0.621	0.494	0.000845548
Srgap1	0.0131723	0.453261	0.368	0.17	0.0455134
Csk	2.61e-05	0.453122	0.701	0.497	0.000234026
Oxa1l	7.95e-06	0.45306	0.851	0.756	8.37e-05
Gcnt1	0.18218	0.452878	0.828	0.604	0.342558
Zfp398	2.57e-06	0.452823	0.517	0.193	3.11e-05
Snrpa	3.93e-06	0.452704	0.908	0.845	4.5e-05
Bok	0.00031914	0.452567	0.448	0.125	0.00201753
Slc25a39	0.000310859	0.452481	0.92	0.911	0.00197394
Dmxl1	1.53e-05	0.452428	0.77	0.604	0.000147935
Slc37a4	5.74e-05	0.452398	0.793	0.568	0.000462057
Utp14b	0.00590167	0.452281	0.391	0.092	0.0237278
Gstp1	1.92e-06	0.451663	0.77	0.595	2.41e-05
Ndufa6	0.0116969	0.451647	0.977	0.991	0.0412741
Emcn	NA	0.451611	0.138	0.119	NA
Cd24a	0.0116521	0.451335	0.92	0.89	0.0411537
Snx7	0.000221715	0.451173	0.828	0.64	0.00147354
Dnajc3	0.000295237	0.451107	0.885	0.824	0.00188355
Rpl41	3.82e-11	0.450953	1	1	1.41e-09
Nrip1	2.61e-05	0.450811	0.77	0.628	0.000234191
Galnt7	3.67e-07	0.450744	0.632	0.277	5.5e-06
Myef2	6.69e-05	0.450568	0.448	0.348	0.000526803
Fis1	0.000360367	0.450549	0.977	0.961	0.00224742
Rbbp6	1.16e-05	0.450416	0.943	0.863	0.000115977
Magi2	0.00374159	0.450416	0.356	0.137	0.0162391
Grina	0.00815593	0.450238	0.908	0.854	0.0309359
Casp3	4.04e-06	0.450102	0.529	0.312	4.61e-05
Sucnr1	0.008777	0.449838	0.368	0.101	0.0329159
Lrrk2	0.000182248	0.449301	0.529	0.286	0.00124926
Fmo2	0.020882	0.449301	0.345	0.134	0.0655544
Cubn	0.140071	0.449085	0.678	0.702	0.282702
Gm45792	0.0522506	0.449034	0.782	0.554	0.133786
Adipor2	1.13e-06	0.448964	0.736	0.542	1.5e-05
Sft2d3	1.19e-07	0.448834	0.69	0.39	2.01e-06
Cacybp	5.79e-06	0.448386	0.897	0.896	6.31e-05
Polr2j	4.03e-06	0.448335	0.943	0.899	4.61e-05
Slbp	0.000111756	0.448166	0.747	0.679	0.000828516
Ppp1cc	0.000185863	0.448068	0.885	0.86	0.00127062
Atxn2	2.37e-05	0.448001	0.805	0.625	0.000215172
Ndufa4	0.000302014	0.447942	1	1	0.00192358
Ywhae	2.93e-06	0.447846	1	1	3.5e-05
H2afy	2.28e-05	0.44776	0.954	0.979	0.000207946
Psmd6	2.25e-06	0.447724	0.931	0.929	2.78e-05
Nktr	0.000279581	0.447591	0.874	0.866	0.00179868
Mrpl30	1.2e-05	0.447472	0.931	0.932	0.000119386
Timm8a1	1.61e-05	0.446995	0.851	0.705	0.0001543
Spp2	0.00279629	0.446993	0.69	0.539	0.0126837
Elof1	3.48e-05	0.446977	0.908	0.881	0.000298466
Ssbp3	1.55e-07	0.446865	0.621	0.36	2.55e-06
Aldh1l1	0.00267794	0.446747	0.414	0.098	0.0122633
Gss	0.0254681	0.446593	0.759	0.75	0.0766048
Ckap4	0.000477921	0.446486	0.816	0.702	0.0028272
Eif4g2	1.62e-05	0.446124	0.989	0.994	0.000154846
Zfp706	2.86e-05	0.445988	0.966	0.932	0.000252504
Tomm40	2.62e-06	0.445799	0.908	0.917	3.16e-05
Rdx	0.00150797	0.445657	0.943	0.979	0.00756757
Ywhab	1.74e-05	0.445316	0.943	0.938	0.000164595
Sdhd	2.3e-06	0.445298	0.931	0.881	2.83e-05
Snhg6	7.96e-07	0.445009	0.609	0.42	1.1e-05
Lamtor5	8.56e-05	0.444999	0.897	0.887	0.000658687
Scp2	0.00102396	0.444756	0.966	0.979	0.00541975
Ndufs7	8.68e-05	0.44432	0.954	0.97	0.000667117
Smap1	0.00247338	0.444211	0.874	0.851	0.0114709
Prdx6	4.38e-06	0.444124	0.931	0.929	4.96e-05
Lrrc58	0.000220431	0.444017	0.77	0.628	0.00146628
Hint1	2.8e-05	0.443908	0.989	0.997	0.000247536
Exosc2	1.66e-05	0.443552	0.483	0.229	0.000159012
Atp2a2	0.0610761	0.443409	0.839	0.821	0.150631
Plac8	0.00865846	0.443211	0.575	0.345	0.0325608
Hoxa10	5.25e-05	0.443165	0.759	0.574	0.000425668
Ndufb7	0.000211308	0.443161	0.989	0.979	0.00140932
Npc2	0.000416516	0.442861	0.92	0.899	0.00252884
Dnajc9	2.04e-06	0.442279	0.552	0.402	2.54e-05
Sfrp1	0.137133	0.442256	0.195	0.095	0.277865
Cdh11	0.0682201	0.442081	0.253	0.095	0.164859
Eps8	0.00325004	0.44189	0.839	0.807	0.0142923
Srsf1	2.58e-05	0.441705	0.828	0.658	0.000232375
Fbln1	0.00289705	0.441507	0.506	0.286	0.0130402
Gnas	4.62e-06	0.441138	0.989	1	5.21e-05
Pdlim5	6.18e-05	0.440812	0.621	0.333	0.000491429
Mrps18c	5.12e-06	0.440303	0.862	0.759	5.66e-05
Smim22	0.0292329	0.439988	0.356	0.104	0.0856372
Kynu	5.65e-05	0.439925	0.483	0.152	0.000455381
Idh3g	2.2e-05	0.439824	0.885	0.815	0.000201458
Hacd4	0.000362071	0.439802	0.701	0.372	0.00225351
Prim1	0.00231322	0.439743	0.391	0.155	0.0108134
Slc52a3	0.00311327	0.439629	0.391	0.176	0.0138305
Ndn	3.95e-05	0.439531	0.586	0.366	0.000333618
Selenoh	0.0068619	0.439468	0.885	0.932	0.0267853
Igf2r	5.51e-07	0.439447	0.701	0.408	7.87e-06
Gm30025	6.6e-06	0.439177	0.494	0.318	7.12e-05
Polr2a	4.92e-05	0.439151	0.805	0.702	0.000403393
Khdrbs1	0.000106785	0.439123	0.874	0.854	0.000797809
Ap1s1	4.95e-05	0.439045	0.839	0.81	0.000404964
Gucd1	0.00488646	0.438822	0.862	0.777	0.0203972
Usp1	0.000126667	0.438529	0.598	0.557	0.00092114
Tbca	0.00229419	0.438373	0.943	0.982	0.010731
Mcm7	0.00015046	0.438196	0.667	0.586	0.00106676
Timp2	2.12e-05	0.437994	0.575	0.295	0.000195464
Tmpo	0.00154736	0.437791	0.828	0.851	0.00771965
Ucp2	0.000193589	0.437787	0.621	0.304	0.00131637
Faah	0.0168895	0.437656	0.391	0.071	0.055299
Ube2e1	4.79e-06	0.437641	0.839	0.768	5.33e-05
Nrxn2	0.0843584	0.437619	0.322	0.071	0.193388
Anapc5	0.000155911	0.437556	0.954	0.887	0.00109929
Hnrnpl	2.48e-05	0.437422	0.851	0.78	0.000224289
Arhgap11a	1.15e-05	0.436998	0.563	0.277	0.00011561
Bin1	3.98e-07	0.436668	0.747	0.432	5.9e-06
Uba1	2.42e-05	0.43648	0.828	0.765	0.00021955
Hsp90aa1	0.000134463	0.436282	1	0.988	0.00096724
Tsn	1.27e-05	0.436159	0.908	0.926	0.000125553
Khdrbs3	7.61e-05	0.43603	0.483	0.238	0.000593493
Atp11b	1.04e-05	0.43581	0.667	0.408	0.000105832
Asph	2.1e-05	0.435736	0.667	0.476	0.000193659
Ccdc124	6.09e-05	0.435435	0.851	0.741	0.000485634
Aprt	0.000416565	0.435239	0.943	0.967	0.00252884
Srp19	4.33e-05	0.434912	0.943	0.848	0.000361896
Pttg1ip	0.00164007	0.434912	0.897	0.783	0.00808939
Ndufb6	0.000311213	0.434381	0.954	0.943	0.00197394
Mprip	2.78e-05	0.434175	0.747	0.533	0.00024669
Trps1	0.027378	0.433974	0.908	0.908	0.0811991
Tmem97	5.73e-07	0.433908	0.609	0.324	8.14e-06
Erbb4	8.48e-05	0.433877	0.506	0.31	0.000655668
Ndufv2	8.21e-05	0.433872	0.954	0.967	0.000637231
Fh1	2.74e-05	0.433774	0.885	0.83	0.00024395
Acsl4	0.000417434	0.433623	0.471	0.134	0.0025321
Ccdc34	0.0856679	0.433481	0.862	0.923	0.195392
Yaf2	2.57e-05	0.433288	0.701	0.491	0.000231499
Rbm42	6.1e-05	0.433123	0.839	0.711	0.000485634
Rpap3	2.1e-07	0.433096	0.701	0.438	3.35e-06
Rbfox2	1.36e-05	0.432809	0.483	0.31	0.000133391
Vdac2	1.79e-06	0.432649	0.966	0.979	2.26e-05
Tcerg1	0.000106337	0.432642	0.828	0.699	0.00079524
Rtl8b	0.000410341	0.432589	0.414	0.232	0.00249701
Mrpl58	5.07e-05	0.432436	0.897	0.872	0.000412988
Dnajb11	4.91e-05	0.432291	0.897	0.753	0.000403393
As3mt	6.28e-05	0.431932	0.851	0.741	0.00049743
Mdh2	2.42e-05	0.431666	0.977	0.982	0.00021955
Map3k7cl	4.8e-05	0.431326	0.414	0.19	0.000396232
Parva	0.000465067	0.431174	0.655	0.551	0.00277479
Fdx1	0.00025081	0.431032	0.908	0.833	0.00163005
Acot4	0.00061015	0.430998	0.529	0.318	0.00347754
Mrps22	1.64e-06	0.430968	0.724	0.509	2.1e-05
Cenpx	0.00208971	0.430884	0.931	0.872	0.00990183
Txndc11	5.05e-07	0.430754	0.621	0.33	7.32e-06
Gls	8.85e-06	0.430593	0.69	0.393	9.16e-05
Sod3	0.151761	0.43021	0.552	0.452	0.299564
Trim2	3.19e-05	0.430139	0.552	0.366	0.000277106
Tubb2a	0.00453364	0.430124	0.552	0.345	0.0191652
Tmx2	3.18e-06	0.430113	0.839	0.637	3.77e-05
Ybx3	1.84e-05	0.429966	0.897	0.92	0.0001733
Emilin1	0.0308725	0.429862	0.264	0.107	0.0894308
mt-Atp8	6.75e-06	0.429786	0.989	0.973	7.27e-05
Dbn1	4.65e-06	0.429635	0.54	0.262	5.22e-05
Mpp1	3.18e-05	0.429569	0.667	0.438	0.000277106
Atrx	0.00113619	0.429489	0.874	0.911	0.00591544
Rab1b	0.000304508	0.429448	0.724	0.616	0.00193785
Tsfm	3.46e-06	0.429423	0.839	0.652	4.07e-05
Nfia	0.00182526	0.429149	0.402	0.196	0.00886308
Exosc7	5.63e-06	0.428936	0.862	0.747	6.17e-05
Mbnl1	4.79e-07	0.42893	0.621	0.36	6.99e-06
Mex3a	0.000132563	0.428809	0.494	0.292	0.000957633
Cenpm	0.00596665	0.42872	0.356	0.146	0.0239638
Taf1d	0.000644507	0.428692	0.92	0.875	0.00364096
Pum3	1.91e-05	0.428481	0.793	0.634	0.00017814
Srp9	5.77e-05	0.428308	0.908	0.955	0.000463914
Pdcd6ip	0.000311761	0.428207	0.816	0.696	0.00197578
Eif4ebp1	0.000111979	0.428143	0.724	0.512	0.000828516
P3h4	2.62e-06	0.428039	0.575	0.36	3.16e-05
Cttnbp2	0.0479232	0.427845	0.333	0.051	0.125998
Nid2	0.000378265	0.42744	0.425	0.17	0.00234096
Etl4	9.54e-05	0.427217	0.609	0.449	0.000723411
Dlat	5.81e-06	0.42719	0.77	0.545	6.32e-05
Ctbp1	8.53e-05	0.427138	0.805	0.815	0.000656911
Syncrip	3.1e-05	0.426986	0.805	0.75	0.000271158
Plcb1	1.48e-05	0.426497	0.598	0.372	0.000143579
Psme1	0.000178786	0.426414	0.931	0.854	0.00122773
Ndufb4	0.010104	0.426321	0.943	0.988	0.0366863
Kmt5a	6.4e-05	0.42621	0.851	0.744	0.000506058
Tcim	0.00993525	0.426146	0.379	0.137	0.0362139
Itm2c	2.28e-05	0.425956	0.839	0.601	0.000207946
Zfp326	7.96e-06	0.425862	0.747	0.554	8.37e-05
Emsy	1.15e-05	0.425817	0.529	0.324	0.000115373
Gapdh	0.00710917	0.42575	0.989	0.997	0.0276235
Stbd1	0.0161113	0.42556	0.368	0.086	0.0534225
Med25	5.73e-05	0.425203	0.782	0.702	0.000461805
Ppp6r3	2.81e-05	0.425182	0.655	0.438	0.000248023
Krcc1	0.000917806	0.425164	0.862	0.848	0.00493304
Tra2a	0.000118961	0.425067	0.897	0.887	0.000874249
Sumo2	2.59e-05	0.424988	0.977	0.988	0.000233157
Tmco1	3.63e-05	0.424717	0.954	0.911	0.000309534
Acot13	0.00501928	0.424581	0.931	0.872	0.0208617
Lsm8	2.72e-05	0.424576	0.805	0.69	0.000242762
Lama5	0.0271527	0.424441	0.345	0.122	0.0805623
Rfc2	5.41e-05	0.424367	0.69	0.64	0.00043795
Metap2	0.000239744	0.424226	0.977	0.97	0.00157285
Polr2k	0.000526064	0.424096	0.862	0.827	0.00305155
Swi5	0.0001318	0.424089	0.977	0.988	0.000953926
Sirt3	3.73e-05	0.424034	0.736	0.554	0.000316412
Ptprg	9.93e-06	0.424027	0.598	0.351	0.000101312
Fus	0.0018319	0.424019	0.92	0.946	0.00888963
Srsf11	8.43e-05	0.424006	0.954	0.94	0.000652999
Selenos	0.0100807	0.423969	0.931	0.92	0.0366271
Fhl1	0.032925	0.423923	0.828	0.601	0.0941149
Set	8.36e-06	0.423883	0.977	0.988	8.74e-05
Nap1l1	0.00219006	0.42373	0.92	0.94	0.0103134
Ktn1	0.000122993	0.423685	0.908	0.83	0.000898696
Rfc1	7.02e-05	0.423605	0.736	0.634	0.000550023
Sem1	0.00023324	0.423389	0.977	0.994	0.00153677
Polr1d	2.77e-05	0.423342	0.954	0.967	0.000245632
U2af1	4.86e-05	0.423216	0.943	0.943	0.000400104
Napa	0.000211315	0.422973	0.897	0.768	0.00140932
Ldhb	0.058747	0.422895	0.989	0.86	0.14597
Dcbld1	1.44e-05	0.422742	0.586	0.31	0.000139705
Hjurp	3.52e-05	0.42243	0.54	0.345	0.000301626
Aldh9a1	3.87e-06	0.422334	0.713	0.455	4.45e-05
Cox7b	0.000380599	0.421774	1	0.979	0.0023535
Zfp618	0.000165344	0.421769	0.69	0.497	0.00115386
Plvap	NA	0.421307	0.172	0.098	NA
Hnrnph1	0.00097029	0.420861	0.839	0.789	0.00518596
Evl	1.21e-05	0.420787	0.655	0.476	0.000120115
Bcl7c	0.000233605	0.420699	0.897	0.836	0.00153785
mt-Nd5	0.000289841	0.420663	0.977	0.991	0.00185222
Btbd2	4.02e-05	0.420384	0.759	0.643	0.000338456
Hmgcr	8.8e-05	0.420174	0.598	0.429	0.000673805
Mid1ip1	0.00409521	0.420057	0.448	0.077	0.0176138
Uhrf1	0.000470259	0.419822	0.425	0.176	0.00279703
Ddb1	0.0004119	0.419645	0.92	0.86	0.00250449
Mvk	6.37e-06	0.419506	0.69	0.42	6.89e-05
Anxa3	0.0341354	0.419381	0.517	0.262	0.0967359
Vdac1	0.000166307	0.419366	0.966	0.988	0.00115869
Kbtbd11	0.00484797	0.419246	0.437	0.128	0.0202808
1700021F05Rik	0.000326918	0.418963	0.782	0.649	0.00206328
Phf20l1	1.83e-05	0.418747	0.713	0.583	0.00017276
Cltc	0.120191	0.418738	0.874	0.878	0.251745
Ubn2	0.000991664	0.41873	0.713	0.685	0.00528174
Ube2r2	0.00216881	0.418565	0.92	0.964	0.0102449
Tmem9	0.000191258	0.418474	0.805	0.756	0.00130284
Eif4ebp2	3.64e-05	0.418152	0.759	0.622	0.00030969
Pnp	9.01e-05	0.417983	0.793	0.625	0.000688253
Wipi1	0.000287508	0.417915	0.529	0.369	0.00183885
Nudc	1.19e-05	0.417857	0.954	0.958	0.000118611
BC005537	0.000162795	0.417738	0.655	0.56	0.00113837
Dgkz	9.75e-06	0.41772	0.552	0.232	9.96e-05
Dcakd	1.42e-05	0.417546	0.759	0.592	0.000138324
D8Ertd738e	0.00197416	0.417364	0.908	0.976	0.00943623
Myl6	0.0117363	0.417346	0.989	1	0.0413939
Pcbp4	6.22e-05	0.417235	0.759	0.649	0.000494338
Parp1	9.31e-05	0.417235	0.759	0.613	0.000708317
Cdip1	5.15e-06	0.417055	0.655	0.464	5.69e-05
Nelfb	3.19e-05	0.416894	0.77	0.562	0.000277106
Add1	0.00116212	0.416675	0.782	0.693	0.00603403
Dlgap5	0.162748	0.416641	0.253	0.045	0.315867
Fnbp1l	0.000121575	0.416511	0.736	0.58	0.000890034
Yeats4	8.85e-05	0.416468	0.862	0.815	0.000677287
Mrpl20	0.00140263	0.416267	0.92	0.914	0.00709482
Trh	NA	0.415654	0.184	0.057	NA
Rpl37	1.6e-07	0.415549	1	1	2.6e-06
Prdx1	0.106023	0.415501	0.966	0.997	0.229947
Dleu7	0.00299471	0.415494	0.391	0.116	0.0134244
Ddc	0.0216343	0.415386	0.379	0.071	0.0674075
Chst15	0.0202148	0.41524	0.368	0.113	0.0638189
Cnbp	0.000161986	0.415149	0.954	0.973	0.00113479
Calu	0.000285538	0.41511	0.77	0.67	0.00182931
Arhgap1	5.7e-06	0.415006	0.552	0.33	6.22e-05
Csnk1g2	0.000136525	0.414841	0.816	0.762	0.000979778
Pomp	0.000404216	0.414839	0.966	0.964	0.00247352
H2afy2	0.000110844	0.414826	0.724	0.515	0.000824104
Psmb6	2.68e-05	0.414763	0.977	0.997	0.000239241
Ywhah	0.0229329	0.414747	0.816	0.762	0.0706759
Eif4h	0.000134525	0.414697	0.92	0.926	0.00096724
Acaa1a	0.000202561	0.414351	0.862	0.848	0.00136163
Hadha	0.000623474	0.414101	0.897	0.842	0.00354028
Pnn	0.000794631	0.414091	0.943	0.946	0.00435679
Tmed10	0.00177446	0.413796	0.966	0.976	0.00864384
Cnot1	0.000148974	0.413736	0.736	0.589	0.00105818
Mtx2	3.64e-05	0.413533	0.874	0.83	0.00030969
Acaa1b	0.0972822	0.413342	0.839	0.69	0.215121
Tspan18	5.79e-05	0.413273	0.69	0.515	0.000464688
Psmd7	3.73e-05	0.41306	0.943	0.964	0.000316412
Gtf2a2	0.000160517	0.413048	0.862	0.786	0.00112753
Svbp	0.000395584	0.413028	0.839	0.839	0.00243043
Vezf1	2.27e-05	0.412933	0.678	0.53	0.000207359
Rab17	0.000111916	0.412933	0.517	0.256	0.000828516
Elovl6	0.00445846	0.412812	0.816	0.705	0.0189297
Mrfap1	2.84e-05	0.41274	0.989	0.979	0.000250988
Pdap1	4.35e-05	0.412676	0.954	0.976	0.000362703
Col6a2	0.0480189	0.412646	0.276	0.107	0.126077
Slc9a5	0.235958	0.412607	0.333	0.012	0.412589
U2surp	0.00109843	0.412601	0.92	0.857	0.00574233
Ube2m	0.00117081	0.41259	0.966	0.949	0.00606579
Incenp	0.06917	0.412383	0.287	0.119	0.166459
Npl	0.0211836	0.411805	0.333	0.137	0.0663552
Ccnd1	0.0164442	0.411735	0.655	0.571	0.0542205
Anxa5	0.0166317	0.411545	0.736	0.586	0.0545661
Ppp1r12a	6.72e-05	0.411051	0.839	0.693	0.000528129
Magoh	0.000195588	0.410856	0.862	0.881	0.0013276
Ewsr1	0.000177224	0.410831	0.92	0.905	0.00122029
Nes	0.0319547	0.410815	0.299	0.137	0.0921227
Cdc37l1	8.52e-05	0.41062	0.655	0.527	0.000656911
Mapre1	9.03e-05	0.410332	0.885	0.827	0.00068949
Mycbp	2.33e-05	0.410318	0.713	0.539	0.000211353
Ccar1	0.00227543	0.410298	0.943	0.908	0.0106759
Camsap3	0.000770116	0.41022	0.46	0.25	0.00424369
Pfn1	0.00532946	0.41019	0.989	0.982	0.0218408
Nono	0.000197663	0.410152	0.954	0.952	0.00133458
Ung	0.00809395	0.409595	0.299	0.128	0.0307313
Nynrin	0.000149134	0.409595	0.552	0.321	0.00105834
Ssr3	0.00257053	0.409595	0.874	0.851	0.0118353
Aurka	0.323438	0.409523	0.207	0.048	0.512102
Tgfbr1	1.86e-05	0.409433	0.552	0.336	0.000174629
Enpp2	0.0581661	0.409403	0.92	0.738	0.144809
Matn2	0.000283337	0.409359	0.437	0.208	0.00181826
Phf5a	0.000275816	0.409092	0.874	0.872	0.00178046
Mgp	0.00977838	0.409059	0.356	0.161	0.0357077
AI314278	0.0155124	0.408751	0.552	0.39	0.0518581
Rpn2	0.00112397	0.408401	0.943	0.932	0.0058574
Gria3	5.01e-05	0.408293	0.632	0.414	0.000408863
Rab11b	0.000395204	0.408057	0.782	0.759	0.00243004
Ogdh	0.000238828	0.408005	0.759	0.533	0.00156818
Rpl35	5.64e-10	0.40773	1	1	1.64e-08
Nxf1	0.00267393	0.407669	0.92	0.911	0.0122523
Clcn5	0.0102334	0.407578	0.747	0.676	0.0370683
Lrrcc1	0.168692	0.407513	0.793	0.771	0.323867
Dido1	1.86e-05	0.407489	0.644	0.44	0.000174669
Sltm	0.00158417	0.407324	0.885	0.875	0.00785713
Slc38a10	0.00069798	0.407324	0.736	0.592	0.00390246
Tet3	7.88e-05	0.407261	0.644	0.396	0.000612488
Rps19	3.44e-07	0.40724	1	1	5.2e-06
Mylk	0.00804218	0.407043	0.276	0.202	0.0305803
Mrpl3	3.43e-05	0.406943	0.747	0.598	0.000295277
Cops9	0.00195962	0.406828	0.908	0.926	0.00939609
Psmb3	0.00154647	0.406477	0.943	0.946	0.00771965
Pam	0.000123355	0.406474	0.598	0.384	0.000900482
Baiap2l2	0.00566839	0.406455	0.425	0.289	0.0229225
Stx3	0.00108475	0.406306	0.713	0.452	0.00568635
Usp50	0.000245118	0.40628	0.644	0.506	0.00159986
Sh3bgrl	0.000470097	0.40622	0.54	0.372	0.00279703
Snx29	0.00025799	0.406183	0.586	0.339	0.00167529
Pbld1	3.79e-05	0.406163	0.609	0.307	0.000320349
Rfc3	2.08e-05	0.406023	0.667	0.473	0.00019254
Fam167b	0.357108	0.405925	0.138	0.042	0.54435
Mfhas1	0.0111721	0.405713	0.644	0.527	0.0399573
Rpl38	9.68e-14	0.405657	1	1	6.33e-12
Rasl11a	0.318497	0.40556	0.138	0.048	0.507457
Luzp1	0.000235446	0.405354	0.701	0.616	0.00154864
Timm50	0.000176795	0.405297	0.828	0.75	0.00121843
Gprasp1	0.00151663	0.405059	0.621	0.443	0.00759609
Adhfe1	0.000262341	0.404783	0.483	0.202	0.0017021
Slco2a1	0.000495546	0.404699	0.46	0.188	0.00291792
Hdac2	6.71e-05	0.404692	0.862	0.738	0.000527981
Rgs3	0.0802583	0.404507	0.276	0.116	0.186335
Gpr137b	0.000771908	0.404471	0.609	0.381	0.0042505
Atad2	0.00264307	0.404429	0.402	0.173	0.0121327
Phactr2	0.000755934	0.404397	0.54	0.324	0.00417569
Mettl1	0.000708203	0.404083	0.759	0.634	0.00394519
Lmna	0.00312477	0.403943	0.793	0.673	0.013853
Mras	0.000393111	0.403822	0.483	0.14	0.00242107
Bcar1	0.00107349	0.403822	0.632	0.443	0.00564284
Gchfr	0.0058993	0.403822	0.356	0.143	0.0237278
Topbp1	5.64e-06	0.40371	0.563	0.277	6.17e-05
Bub3	0.000489137	0.403697	0.77	0.688	0.00288462
Limd2	0.000197576	0.403526	0.552	0.381	0.00133458
Pmvk	0.000172231	0.403081	0.793	0.652	0.00118912
Arid3a	8.48e-05	0.403024	0.54	0.271	0.000655668
Sgo1	0.239381	0.402355	0.276	0.036	0.416953
Prmt1	1.57e-05	0.402299	0.989	0.964	0.000151416
Ppp1r10	6.27e-05	0.40226	0.667	0.473	0.00049743
Tpd52	0.00288759	0.402179	0.92	0.887	0.0130052
Aurkb	0.224837	0.402122	0.218	0.077	0.399448
Lsm6	0.000241645	0.402024	0.77	0.705	0.00158167
2300009A05Rik	0.000193398	0.402012	0.724	0.667	0.00131624
Mrpl27	3.43e-05	0.402008	0.747	0.625	0.000295279
Mxd4	0.00654253	0.401936	0.724	0.714	0.0256729
Pcx	0.000127816	0.401232	0.506	0.256	0.000928607
B230219D22Rik	0.00027652	0.401187	0.897	0.792	0.0017835
Psma1	0.00014032	0.401183	0.954	0.908	0.00100324
Capzb	0.00187114	0.401181	0.885	0.893	0.00904562
Arrdc4	3.28e-05	0.401169	0.529	0.238	0.000283244
Gsta2	0.00507772	0.401073	0.483	0.253	0.0210431
Mapk15	0.0403368	0.401011	0.356	0.095	0.110184
Eftud2	2.74e-05	0.400833	0.678	0.458	0.00024375
Bzw2	0.00135945	0.400796	0.92	0.845	0.00689707
Wdr82	4.03e-05	0.400679	0.563	0.378	0.000338509
Mrpl51	0.000569964	0.400597	0.908	0.943	0.00327783
Mrpl28	0.00080487	0.400461	0.908	0.917	0.0044066
Atp5l	0.001749	0.400405	0.977	1	0.00853069
Smpdl3a	3e-05	0.400014	0.667	0.411	0.000262597
Atp5f1	0.00019916	0.399982	1	0.988	0.00134231
1700020I14Rik	0.000177846	0.399775	0.839	0.67	0.00122237
Bri3bp	0.000155052	0.399748	0.805	0.625	0.00109424
Snf8	0.000167579	0.399718	0.839	0.798	0.00116437
Slc13a1	0.0450172	0.399573	0.322	0.054	0.120305
Defb29	0.0105988	0.399381	0.448	0.202	0.038265
Igfbp2	0.00994964	0.399297	0.414	0.119	0.0362292
Capn10	7.67e-06	0.399194	0.552	0.289	8.14e-05
Tceal9	0.0144601	0.39915	0.966	0.976	0.0490237
Ecsit	1.54e-05	0.398902	0.736	0.503	0.000148635
Tsg101	0.000529277	0.398764	0.793	0.711	0.00306459
Galk1	0.000107826	0.398545	0.954	0.911	0.000804014
Mrps5	0.00110243	0.398163	0.77	0.771	0.00575931
Pcbp2	0.00810752	0.398017	0.954	0.964	0.0307675
Ddah1	0.0621045	0.397962	0.943	0.943	0.152822
Eci3	0.000703706	0.397957	0.494	0.176	0.00392872
Klf6	0.736736	0.397951	0.667	0.497	0.824311
Mta1	0.000405358	0.397947	0.667	0.515	0.00247597
Ube2n	0.000194814	0.397904	0.954	0.908	0.00132352
Srrt	0.00020409	0.397589	0.736	0.604	0.0013707
Trpv4	6.89e-05	0.397525	0.54	0.214	0.000540399
Basp1	0.08904	0.397489	0.506	0.271	0.201341
Cpsf7	2.57e-05	0.397374	0.529	0.321	0.000231689
Cspg4	1.87e-05	0.397083	0.54	0.217	0.000175119
Prom1	0.000891468	0.396933	0.552	0.265	0.00481519
Arl6ip1	0.665494	0.39687	0.874	0.946	0.780717
Nop56	0.000232048	0.396761	0.885	0.753	0.00153156
Prpf19	0.000227302	0.396576	0.851	0.72	0.00150437
Gins2	0.00036159	0.396551	0.448	0.253	0.00225235
Tmem147	0.000741227	0.396499	0.908	0.908	0.00411416
Ly6e	0.584123	0.396374	0.862	0.705	0.724278
Psmb7	0.0001031	0.396297	0.931	0.872	0.000772545
Dtymk	0.000602029	0.396282	0.851	0.768	0.00344152
Cs	0.000654513	0.396264	0.736	0.577	0.00368912
Smn1	8.23e-05	0.39596	0.747	0.619	0.000637919
Rab5c	0.00072009	0.395885	0.874	0.824	0.00400265
Emc8	0.000199553	0.394968	0.805	0.711	0.00134377
Abhd17a	0.00101492	0.394754	0.851	0.812	0.00538672
Rnps1	0.000213175	0.394721	0.805	0.693	0.00141925
Fras1	0.000972046	0.394614	0.621	0.411	0.00518809
Rpl36	2.91e-08	0.394605	1	1	5.65e-07
Ddx17	0.0054277	0.394511	0.828	0.83	0.0221377
Ddx3y	0.00205406	0.394403	0.483	0.223	0.00975708
Zfp740	0.000446875	0.394394	0.724	0.515	0.00268591
Samm50	0.00081213	0.394378	0.92	0.878	0.00443999
Ywhag	3.59e-05	0.394366	0.667	0.488	0.00030652
Fzd2	0.0284425	0.394285	0.276	0.17	0.0837135
Tspan14	0.00020662	0.394206	0.54	0.405	0.00138284
Uqcrc2	0.00070767	0.394139	0.954	0.991	0.00394509
Myh9	0.00766018	0.393904	0.69	0.637	0.0293615
Rrm2	0.0348141	0.393291	0.299	0.128	0.0983312
Tnrc6b	0.00089868	0.393282	0.724	0.664	0.00483705
Oser1	1.74e-05	0.393258	0.713	0.485	0.000164919
Ap2s1	0.00108458	0.393102	0.908	0.887	0.00568635
Lhfp	0.0654969	0.393043	0.299	0.071	0.159455
Secisbp2	4.62e-05	0.393008	0.69	0.491	0.000384042
Pum2	0.0159606	0.392808	0.678	0.631	0.0530609
Gm1673	0.00605464	0.392706	0.724	0.571	0.0241774
Polr2i	0.000713657	0.392234	0.862	0.818	0.00396978
Tpr	0.000606673	0.392092	0.954	0.967	0.0034603
Mtss1	0.0169088	0.392021	0.621	0.518	0.055299
Ndufa11	0.00302533	0.391987	0.989	0.946	0.0135378
Acot7	0.0378635	0.391788	0.575	0.312	0.105004
Hspg2	0.000873979	0.391523	0.632	0.408	0.0047341
Setbp1	0.0320727	0.391427	0.368	0.083	0.0923282
Gnai1	0.0691709	0.391349	0.954	0.914	0.166459
Ddx46	0.000614938	0.391286	0.885	0.839	0.003497
Gsto1	0.000134461	0.391274	0.747	0.548	0.00096724
Smarcb1	0.000223848	0.391166	0.851	0.812	0.00148513
Cox19	0.00123549	0.390668	0.828	0.738	0.00634175
Mrpl21	0.000282773	0.390406	0.885	0.842	0.00181769
2022-09-07	0.005278	0.390282	0.966	0.908	0.0216648
Gapvd1	0.000112555	0.390233	0.782	0.565	0.000830368
Rif1	0.000567942	0.390212	0.69	0.586	0.00326888
Prr5	0.00251672	0.389949	0.517	0.28	0.0116577
Txn2	0.000264163	0.389909	0.931	0.854	0.00171101
Snrnp27	0.000825099	0.389792	0.92	0.952	0.00450124
Lhx1	0.0183162	0.389792	0.586	0.512	0.058993
Sdk1	0.0303054	0.389597	0.333	0.14	0.0882378
Lgals1	0.258263	0.389495	0.678	0.539	0.43972
Usp25	6.82e-05	0.389474	0.563	0.304	0.00053524
Rnf4	4.9e-05	0.389412	0.701	0.503	0.000403393
Rpl31	0.000419606	0.389326	1	1	0.00254326
Fam32a	0.00114795	0.389088	0.874	0.83	0.00597263
Slc25a11	0.000952782	0.388818	0.908	0.899	0.0051031
Kansl3	0.000130639	0.388289	0.46	0.28	0.00094642
Ap3s1	7.98e-05	0.388159	0.655	0.521	0.000619895
Nap1l4	0.000232404	0.388092	0.839	0.789	0.00153258
Psma6	0.000360505	0.388092	0.92	0.926	0.00224742
Cbx1	0.00523605	0.388029	0.943	0.958	0.0215388
Rexo1	0.000459324	0.38797	0.667	0.613	0.00274267
H3f3a	0.000522301	0.387695	1	1	0.00304496
U2af2	0.000603965	0.38738	0.805	0.726	0.00344743
Gm8186	0.000524736	0.387049	0.69	0.595	0.00305155
Sucla2	0.00112427	0.387021	0.862	0.765	0.0058574
Pfdn5	0.00686576	0.386906	0.966	0.991	0.0267866
Zbtb10	0.00240326	0.38687	0.517	0.333	0.0111728
Tcf21	0.0235797	0.386683	0.345	0.182	0.0721744
Kif23	0.0128736	0.386657	0.345	0.244	0.0447339
Gpi1	0.00274614	0.386496	0.943	0.949	0.0125082
Asf1a	0.000162378	0.38648	0.713	0.604	0.00113649
Rpl39	3.31e-07	0.386419	1	1	5.04e-06
Psmd1	0.00303249	0.386235	0.874	0.786	0.0135471
Prelid1	0.0124098	0.386043	0.977	0.985	0.0434086
Ndufs6	0.00130214	0.385621	0.989	0.988	0.00663486
Psma5	0.000525634	0.385594	0.92	0.961	0.00305155
Rpa2	0.00260899	0.38552	0.402	0.167	0.0119979
Cox4i1	0.0150426	0.38542	1	1	0.0505364
Immp1l	0.000528151	0.385394	0.816	0.744	0.0030604
Hirip3	0.00100698	0.385109	0.437	0.283	0.00535212
Hnrnpk	0.000243285	0.385004	0.989	0.997	0.00158925
Snrnp70	0.000895603	0.384791	0.908	0.97	0.00482389
Ctsd	0.00426526	0.384742	0.908	0.86	0.0182384
Zwint	0.000710307	0.384727	0.816	0.69	0.00395402
Stub1	0.00609299	0.384656	0.954	0.961	0.0243179
Tia1	0.000922053	0.384626	0.736	0.661	0.00494891
Mrps35	0.00123496	0.384587	0.851	0.753	0.00634175
Ago2	0.00162558	0.384188	0.621	0.539	0.00802921
Iars2	0.000402708	0.384086	0.736	0.568	0.00246824
Pbk	0.220408	0.384054	0.207	0.051	0.393869
Dgcr2	0.000197627	0.38372	0.54	0.363	0.00133458
Hat1	0.000742707	0.383619	0.655	0.568	0.00411749
Gm10639	0.102485	0.383503	0.655	0.384	0.224375
Snx3	0.0100065	0.383441	0.931	0.946	0.036419
Timm9	0.00056798	0.383376	0.897	0.723	0.00326888
Bola2	0.00619865	0.383356	0.839	0.881	0.0246443
Rbm17	0.000447827	0.38315	0.851	0.827	0.00268661
Dusp11	0.00167399	0.38315	0.816	0.786	0.00823843
Rest	0.00558195	0.3828	0.828	0.777	0.0226689
Unc119	0.000205052	0.382796	0.713	0.527	0.00137475
Ndufs1	0.0023414	0.382774	0.828	0.759	0.0109251
Tk1	0.0396295	0.382774	0.322	0.092	0.108757
Ehd4	0.00925612	0.382704	0.333	0.17	0.0342921
Tmem178	0.00191502	0.382591	0.425	0.202	0.00922275
Naa38	0.00451303	0.382334	0.828	0.786	0.0191011
Smtnl2	0.00196345	0.382327	0.713	0.577	0.00940858
Cdkn3	0.225969	0.382306	0.241	0.045	0.401087
Dpm3	0.00242221	0.382112	0.92	0.902	0.0112404
Rnaseh2c	0.0391869	0.382088	0.874	0.815	0.107891
Tagln	NA	0.382049	0.264	0.128	NA
Lyar	0.000494157	0.381802	0.793	0.744	0.00291198
Pdcd5	0.00651018	0.381592	0.977	0.958	0.0255953
Clspn	0.0872908	0.381566	0.253	0.086	0.198561
Pgls	0.0120268	0.381522	0.943	0.964	0.0422365
Ahsa1	0.000405623	0.381435	0.862	0.81	0.00247597
Rbm14	7.79e-05	0.381399	0.54	0.262	0.000606664
Galnt18	0.00313045	0.38139	0.644	0.5	0.0138621
Actl6a	3.31e-05	0.381356	0.874	0.693	0.000285722
Anapc2	0.000399233	0.381069	0.69	0.527	0.00244891
Ctnna1	0.0165055	0.380485	0.862	0.848	0.0543389
Ube3a	0.0056047	0.380374	0.897	0.905	0.0227251
Cryzl1	0.000617827	0.380304	0.644	0.58	0.00351082
Ybx1	0.00599888	0.380238	1	1	0.0240679
Nudt16l1	0.00261997	0.380036	0.667	0.622	0.0120411
Bod1	0.00038663	0.379979	0.908	0.732	0.002385
Orc6	0.000353659	0.379913	0.609	0.491	0.00221377
Psmg4	0.000475191	0.379726	0.828	0.661	0.00281542
Zfp207	0.00184583	0.379715	0.851	0.783	0.00895158
Romo1	0.0235463	0.379573	0.954	0.985	0.0721012
Got2	0.00418987	0.379493	0.931	0.884	0.0179805
Elob	0.0526503	0.379361	0.966	0.991	0.134494
Wwp2	9.59e-05	0.379342	0.54	0.318	0.000726717
Ctdspl	0.175138	0.379342	0.874	0.86	0.332072
Tm4sf1	NA	0.379342	0.207	0.095	NA
Gars	0.000447574	0.379153	0.77	0.64	0.00268661
Ruvbl2	0.000111804	0.379048	0.862	0.658	0.000828516
Gipc1	0.00104386	0.378999	0.885	0.812	0.00550224
Ndufs8	0.00489237	0.378716	0.874	0.92	0.0204107
Erf	0.000665571	0.378702	0.598	0.426	0.00374592
Chka	0.00714729	0.378571	0.609	0.494	0.0277012
Uqcc1	1.74e-05	0.378471	0.586	0.351	0.000164595
Polr3k	0.000101536	0.378471	0.736	0.554	0.000763065
Top2b	0.000850105	0.378471	0.816	0.711	0.00461132
Cenpk	0.0624919	0.378385	0.299	0.098	0.153528
Calm3	0.0115721	0.378357	0.989	0.982	0.0410611
Creb1	4.71e-05	0.378342	0.575	0.354	0.000390123
Midn	0.00165959	0.378279	0.632	0.548	0.00817282
Fdft1	0.00036567	0.378096	0.54	0.366	0.00227406
Wdr6	0.000337959	0.377999	0.483	0.318	0.00212769
Psmc3	0.000843912	0.377958	0.931	0.94	0.00458423
Atf4	0.0157593	0.377921	0.874	0.786	0.0525057
Smpd1	0.000229003	0.377856	0.701	0.47	0.00151407
Rap1b	0.00146482	0.377553	0.851	0.759	0.00735588
Brd2	0.0178668	0.377524	0.805	0.804	0.0577405
Epn1	0.00118434	0.377408	0.782	0.717	0.00611615
Sf3b3	0.00269216	0.377382	0.793	0.771	0.0123211
Arl3	0.00308131	0.377226	0.862	0.804	0.0137321
Trappc5	0.000340533	0.377223	0.782	0.604	0.00214037
Gatad2a	0.000147714	0.377153	0.655	0.464	0.00105021
Ppil2	0.000707165	0.377121	0.851	0.711	0.00394509
Zcrb1	0.00738412	0.376988	0.897	0.875	0.0285004
Get4	5.07e-05	0.376739	0.632	0.387	0.000412782
Fam213a	0.00199207	0.376696	0.874	0.768	0.00950401
Scaf11	0.00312747	0.376643	0.908	0.902	0.013857
Rbms1	0.0169779	0.376643	0.805	0.729	0.055454
Tceal8	0.00355311	0.376562	0.92	0.854	0.015518
Calr	0.00549187	0.376505	1	0.994	0.0223475
Lage3	0.00501958	0.376469	0.793	0.824	0.0208617
Nedd8	0.00236138	0.376447	0.977	0.988	0.0109982
Aes	0.0380558	0.376271	0.977	0.991	0.105499
Ndufa2	0.00162622	0.376191	1	0.997	0.00802921
Gc	0.302013	0.376072	0.264	0.033	0.489147
Gimap6	0.346757	0.375945	0.138	0.062	0.534004
Enpep	0.0108142	0.375863	0.92	0.735	0.038859
Pbrm1	0.0399946	0.375858	0.805	0.827	0.109377
Sema4g	0.08411	0.375823	0.356	0.077	0.193107
Zfand5	0.00303257	0.375716	0.805	0.679	0.0135471
Eif3f	0.000306558	0.375531	0.977	1	0.00194927
Snd1	0.000680818	0.375461	0.77	0.586	0.00381488
Net1	0.00175701	0.375412	0.54	0.333	0.0085643
Zcchc14	0.000200241	0.375274	0.563	0.31	0.00134722
Nans	4.67e-05	0.375264	0.621	0.408	0.000387541
Mcur1	0.00522537	0.37524	0.782	0.601	0.0215065
Itgb5	0.0382823	0.375102	0.322	0.188	0.10582
Mindy2	0.00139966	0.375058	0.598	0.452	0.00708449
Eif3a	0.0151888	0.374897	0.966	0.97	0.0509828
Fyn	0.0142817	0.374785	0.368	0.104	0.0485878
Llgl2	0.0010156	0.37463	0.598	0.375	0.00538672
Chd6	0.00628986	0.374614	0.793	0.717	0.0249343
Cdc42bpb	0.00103146	0.374288	0.54	0.369	0.00544812
Actn1	0.00424477	0.374288	0.621	0.426	0.0181752
Ddx39b	0.000406048	0.374246	0.977	0.946	0.00247597
Copz2	0.00152434	0.374042	0.644	0.491	0.0076247
Leng1	0.000105909	0.373901	0.586	0.473	0.000792813
Uchl5	6.62e-05	0.373852	0.644	0.479	0.000522251
Wdr45b	0.0001974	0.373784	0.793	0.592	0.00133458
Aak1	0.00038605	0.373669	0.529	0.357	0.00238334
Cwc15	0.000757593	0.37339	0.931	0.905	0.00418071
Pja1	0.000754842	0.373365	0.793	0.679	0.00417457
Arpc5l	0.00270806	0.373354	0.828	0.786	0.0123642
Gatad2b	0.00320632	0.373037	0.598	0.509	0.0141489
Pxdn	0.000246352	0.372649	0.471	0.22	0.00160655
Ak6	0.00084885	0.372561	0.736	0.625	0.00460779
Sf3a2	0.00024671	0.372136	0.632	0.438	0.00160751
Cdh16	0.0501085	0.372045	0.851	0.696	0.129736
Ubxn4	0.0235401	0.371893	0.92	0.952	0.0721012
Gatsl2	0.000479693	0.371881	0.46	0.208	0.00283549
Dctpp1	0.00193069	0.371821	0.897	0.902	0.0092792
Smg6	0.000111328	0.371559	0.621	0.443	0.000826897
Mbd3	0.00536737	0.371481	0.885	0.92	0.0219491
Anp32b	0.000932381	0.37147	0.977	0.994	0.00499733
Dctn3	0.00372961	0.371425	0.92	0.935	0.0161963
Fam120a	0.00307924	0.371297	0.736	0.61	0.0137308
Ndufb11	0.00320526	0.371188	0.977	0.985	0.0141489
Mcee	0.00486171	0.371181	0.874	0.887	0.0203271
Ogfrl1	0.000197578	0.371136	0.483	0.229	0.00133458
Cse1l	6.08e-05	0.37105	0.529	0.336	0.000485634
2210011C24Rik	0.00866874	0.370964	0.586	0.333	0.0325665
Hnrnpll	0.000143637	0.370925	0.69	0.503	0.00102409
Ralb	0.000611605	0.370904	0.621	0.524	0.00348323
Wnk1	0.00987651	0.370761	0.782	0.696	0.0360316
Gmps	0.00157919	0.370728	0.839	0.774	0.00784259
Dcun1d5	0.0010461	0.370681	0.874	0.821	0.00550644
Polr2h	0.00117108	0.370374	0.793	0.72	0.00606579
Kctd17	0.00936463	0.370374	0.414	0.116	0.0345935
Tle4	0.0115587	0.370374	0.598	0.47	0.0410326
Gtf2h5	0.00318547	0.370161	0.943	0.932	0.0140976
Arid4a	0.000643332	0.369855	0.678	0.533	0.00363952
Rpl27	0.000297279	0.369788	0.989	0.982	0.001895
Fam49b	9.13e-05	0.369773	0.632	0.446	0.000695889
Pwwp2a	9.93e-05	0.369773	0.655	0.432	0.000749181
Ubap2l	0.0149689	0.369652	0.92	0.884	0.0503332
Rasa2	5.11e-05	0.369647	0.563	0.268	0.000415517
Smarcd1	0.00143334	0.368887	0.655	0.568	0.00722625
Arf1	0.00924975	0.368865	0.943	0.991	0.0342851
Atp6v0e	0.0165446	0.368793	0.92	0.926	0.0543638
Clic5	0.00525347	0.36873	0.402	0.158	0.0215908
Mesd	0.000247783	0.368714	0.805	0.688	0.00161175
Klhdc2	0.00197627	0.368691	0.885	0.789	0.00944039
Tmed9	0.00234283	0.36869	0.966	0.958	0.0109251
Pcf11	0.000535768	0.368564	0.632	0.396	0.00309281
Cnn2	0.0425972	0.368327	0.356	0.241	0.115287
Ncln	0.000410005	0.368301	0.782	0.545	0.00249695
Pdgfa	0.00823956	0.368176	0.747	0.613	0.0312066
Lsm4	0.0213918	0.368127	0.954	0.964	0.0668976
Reep5	0.0355375	0.368104	0.92	0.821	0.0998211
Pop4	6.36e-05	0.368062	0.54	0.229	0.000503434
Elavl1	0.000533395	0.368049	0.908	0.792	0.00308143
Znrf2	0.000226514	0.36804	0.598	0.446	0.00150152
Chd8	0.00139301	0.368027	0.736	0.583	0.00705552
Cggbp1	0.0121675	0.368018	0.816	0.658	0.0426391
Arhgef12	0.021496	0.367773	0.713	0.643	0.0671183
Rab35	8.57e-05	0.367746	0.609	0.375	0.000658687
Gm15638	0.0136333	0.367615	0.46	0.25	0.046768
Bri3	0.0705171	0.367346	0.92	0.97	0.169096
Copz1	0.00493304	0.367254	0.805	0.795	0.0205579
Mlf2	0.0271216	0.36716	0.943	0.955	0.0805012
1500011B03Rik	0.000552898	0.367132	0.46	0.188	0.00318929
Glb1	0.00446061	0.3671	0.782	0.679	0.0189297
Wasl	0.0192164	0.367081	0.828	0.765	0.0612028
Arhgap10	0.000374649	0.366908	0.655	0.467	0.00232234
Sf3b2	0.00432143	0.366677	0.943	0.964	0.0184209
Xpo1	5.9e-05	0.36656	0.678	0.503	0.000473302
Usp24	0.00026554	0.366475	0.586	0.366	0.00171848
Samd4b	0.00173222	0.366404	0.552	0.476	0.00845964
Arl4a	0.0128701	0.366235	0.517	0.339	0.0447339
Cavin3	0.0846477	0.366188	0.218	0.113	0.193762
Zmiz1	0.0129852	0.365972	0.586	0.571	0.0450093
Naa20	0.00157328	0.365797	0.828	0.708	0.00782501
Cops3	0.00122703	0.365779	0.851	0.807	0.00630678
Dus1l	0.000170289	0.365697	0.747	0.56	0.001178
Npepps	0.00823634	0.365531	0.701	0.723	0.0312066
Enah	0.00325576	0.36544	0.713	0.56	0.0143092
Ckap5	0.000630859	0.36525	0.563	0.476	0.0035769
Opa3	0.000108543	0.365069	0.563	0.369	0.00080857
Mrpl34	0.0133762	0.364988	0.931	0.943	0.0460307
Pex19	0.00211765	0.364975	0.69	0.589	0.0100156
Ube2e3	0.00412496	0.364904	0.885	0.881	0.0177213
Brd1	0.00604849	0.364849	0.851	0.768	0.0241655
Atp5g2	0.0263299	0.364837	0.989	0.991	0.0787107
Zc3h15	0.00307841	0.364708	0.966	0.985	0.0137308
Anp32e	0.00584106	0.364584	0.851	0.827	0.023546
Ppp2r2d	0.00143815	0.364413	0.632	0.527	0.00724098
Tram2	0.00229112	0.364357	0.437	0.131	0.0107232
2310009B15Rik	0.000394585	0.364295	0.724	0.58	0.00242819
Psma7	0.00510647	0.364295	0.977	0.985	0.0211309
Csrp1	0.00592732	0.364295	0.402	0.193	0.0238184
Laptm4a	0.00689654	0.364094	0.931	0.955	0.0268793
Rala	0.0459774	0.363856	0.885	0.866	0.121988
Sgk1	0.2484	0.363816	0.184	0.057	0.427787
Rcor1	0.00420282	0.363569	0.609	0.506	0.0180259
Rasl11b	0.0416749	0.363548	0.322	0.116	0.112991
Igfbp6	0.0577923	0.363405	0.253	0.08	0.144066
Edf1	0.0497368	0.363217	0.954	0.988	0.129079
Ptprk	0.000672769	0.363209	0.713	0.467	0.00378086
Tm2d2	0.00559544	0.363197	0.92	0.884	0.0227116
Rpl36a	0.000894907	0.363159	1	1	0.00482353
Hspa8	0.000139269	0.363005	0.989	0.997	0.000996662
Akirin2	0.00271291	0.362956	0.839	0.744	0.012379
Rac1	0.0190471	0.362927	0.885	0.89	0.0608128
Prrc2b	0.000468794	0.362794	0.667	0.518	0.00279485
Ptpa	0.00104502	0.362794	0.644	0.5	0.00550455
Arl6ip4	0.00169281	0.362592	0.874	0.732	0.00829369
Mapkapk2	0.000516569	0.362478	0.621	0.417	0.00302308
Tbc1d13	0.00097774	0.362444	0.425	0.211	0.00521484
Mrpl43	0.00501112	0.362444	0.874	0.89	0.0208492
Sox12	0.000694204	0.362393	0.655	0.497	0.00388419
Sf3b4	0.000883441	0.362342	0.782	0.676	0.00477858
Foxp1	0.0398117	0.362193	0.736	0.741	0.109179
Hddc2	0.000133117	0.362075	0.805	0.586	0.000960734
Actr1b	0.000585221	0.361963	0.609	0.524	0.00335799
Atg101	0.00185582	0.36179	0.667	0.503	0.00897722
Slc35b2	0.00145696	0.361701	0.736	0.655	0.00732118
Tmem167	0.00541238	0.361696	0.908	0.914	0.0221095
Rpl8	2.32e-08	0.3616	1	1	4.63e-07
2900097C17Rik	0.002855	0.361574	0.77	0.679	0.0129041
Ltbr	0.000533095	0.36153	0.609	0.375	0.00308143
Slc51b	0.0334648	0.361253	0.437	0.223	0.0951531
Kif15	0.251148	0.361225	0.264	0.042	0.431361
Plagl1	0.048082	0.361157	0.333	0.17	0.126199
Taf3	0.000125766	0.361108	0.609	0.339	0.000915457
Pfkp	0.00664491	0.361071	0.586	0.369	0.0260313
Bod1l	0.0491269	0.360804	0.862	0.875	0.128105
Eif3m	0.0144447	0.36075	0.954	0.97	0.0490017
Mrps26	0.00420668	0.360684	0.908	0.86	0.0180323
Adrm1	0.0184135	0.360521	0.839	0.798	0.0592068
Efna1	0.000121154	0.360502	0.609	0.324	0.000887806
Mcrip2	0.00602909	0.360362	0.77	0.631	0.0241385
4833439L19Rik	0.0341647	0.360344	0.713	0.664	0.0967676
Adipor1	0.0019316	0.360323	0.782	0.676	0.0092792
Ube2d3	0.0240148	0.35999	0.977	0.994	0.0733009
Smurf2	0.000312796	0.359949	0.483	0.274	0.00198069
Sfswap	0.000803301	0.359805	0.552	0.399	0.00440117
Nrp2	0.0402649	0.359792	0.322	0.101	0.110055
Auts2	0.00943701	0.359605	0.828	0.729	0.0347936
Tcp1	0.000503858	0.359484	0.954	0.982	0.00295548
Erbb2	0.0124379	0.359359	0.356	0.208	0.0434472
Hspe1	0.00252393	0.359346	1	0.994	0.0116841
Fam96b	0.00522208	0.359297	0.805	0.699	0.0215045
Brk1	0.0125627	0.359275	0.862	0.905	0.0437834
Pik3r2	0.000212085	0.3592	0.517	0.321	0.00141322
Proser1	0.000676485	0.359074	0.529	0.393	0.00379895
Slc16a13	0.0092037	0.358926	0.379	0.161	0.0341973
Purb	0.0116294	0.358843	0.943	0.923	0.0411288
Psma2	0.00476613	0.358768	0.92	0.973	0.0200041
Ruvbl1	0.00256614	0.358704	0.839	0.765	0.0118222
Eif5a	0.000635141	0.358692	0.989	1	0.00359584
Cd81	0.125205	0.358634	0.943	0.961	0.260039
Shcbp1	0.0917904	0.358496	0.299	0.074	0.205554
Pgpep1	0.0106922	0.358426	0.736	0.69	0.038518
Mark2	0.00209656	0.358398	0.713	0.548	0.00992814
Ik	0.00552866	0.358387	0.862	0.86	0.0224764
Prkar2a	0.00193797	0.358279	0.621	0.512	0.00930398
Rfk	0.00532398	0.358241	0.713	0.551	0.02183
Lbr	0.000366513	0.358193	0.471	0.182	0.00227744
Pfdn1	0.0226812	0.358037	0.943	0.964	0.0700696
Zfp428	0.000153013	0.357951	0.563	0.324	0.00108285
Dag1	0.0843825	0.357888	0.805	0.86	0.193388
Fbxo22	0.000747911	0.357831	0.862	0.732	0.00414223
Stt3a	0.00143249	0.357801	0.69	0.583	0.00722625
Ddx3x	0.1419	0.357781	0.885	0.83	0.285256
Ssna1	0.00748909	0.357753	0.816	0.839	0.0287749
Asb13	0.000500763	0.357742	0.54	0.307	0.00293958
Insig1	0.0289477	0.357681	0.368	0.086	0.0849643
Eif1ax	0.0147822	0.357546	0.908	0.899	0.0498787
Foxc2	0.204525	0.357437	0.241	0.071	0.372986
Rlim	0.00923299	0.357354	0.655	0.571	0.0342562
Fjx1	0.00020724	0.357302	0.506	0.253	0.00138577
Mocs2	0.0011741	0.357253	0.747	0.64	0.00607558
Cfl1	0.017791	0.357167	0.977	1	0.0575927
Isyna1	0.00254805	0.357164	0.678	0.634	0.01177
Eif1	0.0686321	0.356979	1	1	0.165527
Ddx1	0.00321093	0.356973	0.897	0.851	0.0141529
Rbm25	0.0249646	0.35696	0.931	0.985	0.0755476
Skp2	0.00372194	0.356951	0.448	0.146	0.0161906
Kcnj16	0.0329595	0.356951	0.356	0.125	0.0941718
Msrb1	0.00600807	0.356774	0.782	0.649	0.0240922
Ndufa13	0.0114428	0.356518	1	0.991	0.0407055
Smim11	0.0077292	0.356504	0.793	0.783	0.0295815
Bgn	0.0921374	0.35649	0.276	0.104	0.206089
Dcaf7	0.000153945	0.356441	0.586	0.429	0.00108844
Spsb3	5.16e-05	0.356418	0.529	0.292	0.000418862
Tpp2	0.00299339	0.356388	0.609	0.435	0.0134244
Utp11	0.00288487	0.35635	0.862	0.857	0.0130052
Galm	0.00152201	0.356322	0.448	0.193	0.007618
Psmd8	0.00336056	0.356282	0.92	0.955	0.0147275
Rpl36al	0.00636594	0.356241	0.954	0.923	0.0251518
Cbl	0.000227339	0.356168	0.506	0.259	0.00150437
Ythdf2	0.00126177	0.356131	0.724	0.56	0.00645237
Vwa1	0.0512374	0.356088	0.322	0.089	0.131721
Rbms3	0.00287291	0.356054	0.402	0.185	0.012962
Xpo7	0.00127133	0.355885	0.552	0.423	0.00649519
Maea	0.00255259	0.355702	0.793	0.688	0.0117811
Etfa	0.0043955	0.355627	0.92	0.935	0.0186846
Tbrg1	0.0263874	0.355559	0.931	0.917	0.0787959
Wbp11	0.0105598	0.355549	0.851	0.824	0.038142
Pip4k2c	0.000204531	0.355295	0.506	0.375	0.00137246
Rbm10	0.00026785	0.355285	0.69	0.506	0.00173196
Celsr1	0.000472681	0.35514	0.494	0.295	0.00280744
Ptpra	0.000742904	0.35513	0.667	0.568	0.00411749
Upf3a	0.00126211	0.355106	0.678	0.658	0.00645237
Kif20a	0.332962	0.355106	0.23	0.042	0.522016
Sf3a3	0.00134573	0.355016	0.839	0.735	0.00684325
Itpa	0.000469225	0.354736	0.713	0.53	0.00279523
1110038F14Rik	0.0063883	0.354446	0.816	0.741	0.0252199
Ubr4	0.0164154	0.354373	0.678	0.551	0.0542024
Ttc1	0.00103099	0.354327	0.736	0.625	0.00544812
Rbm22	0.00182452	0.354025	0.805	0.637	0.00886308
Eps8l2	0.0450486	0.354025	0.747	0.551	0.120305
Glis2	0.0486232	0.353971	0.782	0.693	0.127052
Ilkap	0.00248674	0.353928	0.793	0.67	0.0115259
Ndufaf2	0.00312079	0.353871	0.782	0.688	0.0138434
Xpr1	0.00228749	0.353594	0.621	0.497	0.0107194
Wasf2	0.00910218	0.353588	0.747	0.631	0.0339092
Med19	0.000406237	0.353567	0.839	0.67	0.00247597
Ndufb3	0.0197307	0.353511	0.954	0.899	0.0624179
Gcsh	0.0191532	0.353507	0.989	0.935	0.0610968
Rad23a	0.000167077	0.353445	0.713	0.435	0.00116233
Slc22a27	0.135854	0.353395	0.172	0.089	0.275825
Sel1l	0.00323986	0.353373	0.552	0.509	0.014264
Macrod2	0.000169474	0.353279	0.529	0.31	0.00117433
G3bp2	0.00659664	0.353214	0.885	0.812	0.0258687
Eea1	0.00649914	0.353208	0.759	0.631	0.0255651
Cyth3	0.00456532	0.352995	0.345	0.25	0.0192459
Gpatch8	0.00653814	0.352843	0.759	0.682	0.0256729
Bnip1	0.000184336	0.352674	0.529	0.357	0.00126194
Ugt8a	0.153903	0.352674	0.299	0.048	0.30301
Rpl37a	0.00270519	0.352536	1	1	0.0123624
Anapc13	0.0434895	0.352428	0.954	0.935	0.116998
Slc7a8	0.144169	0.352269	0.264	0.045	0.288754
Osbpl1a	0.000311114	0.352175	0.632	0.449	0.00197394
Tbl1x	0.00746728	0.352088	0.828	0.798	0.0287229
Aifm1	0.0100468	0.35195	0.816	0.795	0.0365483
Appl1	0.000903847	0.35194	0.69	0.455	0.00486144
Smc6	0.0093886	0.35194	0.851	0.815	0.0346403
Fhod3	0.0162358	0.351915	0.575	0.363	0.0537652
Safb	0.00292648	0.351817	0.782	0.714	0.0131494
Wdr26	0.00636775	0.351718	0.885	0.821	0.0251518
Bmp1	0.0224888	0.351586	0.368	0.134	0.0695878
Akr1a1	0.00522132	0.351573	0.989	0.985	0.0215045
Hnf1a	0.0370542	0.351531	0.414	0.318	0.103322
Ahcyl1	0.0386568	0.351505	0.736	0.673	0.106662
Brd8	0.0247156	0.351479	0.759	0.69	0.0750202
Gxylt1	0.000190057	0.351383	0.54	0.256	0.00129697
Gpat4	0.00394107	0.351284	0.632	0.503	0.0169905
Serbp1	0.00379183	0.35109	1	0.994	0.0164105
Baz2b	0.0207672	0.350916	0.747	0.676	0.0652915
Rsu1	0.00768095	0.350889	0.77	0.705	0.0294263
Arhgef17	0.00663457	0.350751	0.414	0.229	0.0260041
Atic	0.000531393	0.350694	0.713	0.527	0.00307452
Dbnl	0.00237294	0.350521	0.793	0.696	0.0110453
Pole4	0.000397323	0.350447	0.713	0.539	0.00243915
Eif4a3	0.00273596	0.35033	0.885	0.83	0.0124692
Slc22a2	0.0889547	0.350306	0.448	0.265	0.201256
Mbnl2	0.0311519	0.35021	0.874	0.818	0.0901529
Triobp	0.00132584	0.349875	0.437	0.295	0.0067511
Fam213b	0.00207863	0.349755	0.701	0.533	0.00985543
Nphp3	0.01409	0.349755	0.391	0.146	0.0480973
Phc2	0.000582819	0.349657	0.621	0.438	0.00334672
Rufy3	0.0226984	0.349606	0.724	0.592	0.0700945
Mpzl1	0.00426905	0.349569	0.632	0.405	0.0182384
Matr3	0.00537082	0.349509	0.897	0.845	0.0219514
Kpnb1	0.00389403	0.349401	0.782	0.64	0.0168337
Edc4	0.000134258	0.34937	0.54	0.25	0.00096724
Serpine2	0.125469	0.34932	0.241	0.095	0.260517
Prpf40a	0.0232606	0.349297	0.931	0.938	0.0714267
Senp6	0.0246465	0.34912	0.897	0.896	0.07487
Tmem242	0.000920259	0.349108	0.724	0.533	0.00494276
Fen1	0.00967161	0.349051	0.379	0.143	0.0353854
C1qbp	0.00697891	0.348873	0.966	0.967	0.0271588
Keg1	0.147056	0.348726	0.966	0.881	0.292751
Larp1	0.00560772	0.348703	0.782	0.658	0.0227252
Smad5	0.000485007	0.348681	0.483	0.298	0.00286248
Cenph	0.0442128	0.348605	0.322	0.119	0.118499
Dock1	0.0015736	0.348592	0.54	0.384	0.00782501
Rpl34	0.00958586	0.348568	1	1	0.0352277
Ltbp1	0.185499	0.348395	0.207	0.077	0.346898
Bfar	0.00382598	0.348376	0.782	0.643	0.0165489
Tsc2	0.000474878	0.348326	0.448	0.229	0.00281542
Sec31a	0.0559215	0.348215	0.736	0.688	0.140687
Rwdd1	0.0284902	0.348095	0.897	0.896	0.0838147
Csnk1e	0.000785807	0.348048	0.736	0.435	0.0043146
Selenom	0.34452	0.348029	0.575	0.449	0.531953
Ppp4c	0.0039414	0.348015	0.678	0.676	0.0169905
Uqcrb	0.0467545	0.347923	0.977	0.991	0.12358
Myo7a	0.0851695	0.347901	0.356	0.128	0.194559
Chmp4b	0.0114148	0.347726	0.885	0.798	0.040654
Gm17018	0.00452068	0.34769	0.828	0.72	0.0191209
Ddx10	0.000523362	0.347577	0.575	0.449	0.00304882
Lrrfip1	0.00487342	0.347539	0.494	0.333	0.0203538
Metrnl	0.017186	0.347425	0.345	0.119	0.0560086
Dcxr	0.0189347	0.347336	0.713	0.601	0.0605261
Riok1	0.000430958	0.347309	0.747	0.536	0.00260586
Stx16	0.00168391	0.347149	0.77	0.61	0.00826068
Ndufab1	0.0156522	0.347111	0.989	0.982	0.05224
Arl8b	0.000510851	0.347096	0.678	0.485	0.0029942
Plxnb2	0.0115926	0.347071	0.701	0.625	0.0410765
Ip6k2	0.000644541	0.346954	0.609	0.488	0.00364096
0610010K14Rik	0.000687635	0.346954	0.609	0.479	0.00385025
Atxn7l3b	0.0836935	0.346848	0.966	0.994	0.192498
Btbd7	0.00229071	0.346843	0.678	0.595	0.0107232
Spcs1	0.0407883	0.346808	0.931	0.964	0.111099
Dpy30	0.0193712	0.346709	0.862	0.881	0.0615528
Ubl5	0.0980822	0.346709	0.931	0.985	0.216597
Eif2s1	0.00340786	0.346557	0.931	0.881	0.0149177
Mtus1	0.0192726	0.346336	0.379	0.158	0.0613496
Car8	0.0713518	0.346212	0.379	0.086	0.170419
Cmtm7	0.00324256	0.346148	0.586	0.372	0.0142676
Eif5	0.0567027	0.346025	0.966	0.997	0.142134
Ganab	0.00333144	0.345949	0.805	0.628	0.0146083
Srprb	9.84e-05	0.345942	0.644	0.393	0.000743738
Arglu1	0.00174117	0.345764	0.943	0.92	0.00849792
Nedd4	0.0164439	0.345763	0.954	0.994	0.0542205
Capza1	0.00319756	0.345581	0.667	0.557	0.0141347
Prpf38b	0.00547166	0.345382	0.851	0.86	0.0222802
Cul7	0.0113213	0.345184	0.506	0.393	0.0403935
Pbx2	0.00284436	0.345157	0.828	0.655	0.0128788
Phlda2	0.262768	0.345127	0.172	0.042	0.4459
Taz	0.000778219	0.345114	0.667	0.503	0.00427601
Togaram1	0.000168136	0.345094	0.54	0.277	0.00116612
Tm9sf2	0.0280269	0.345041	0.839	0.818	0.0827464
Cfh	0.294179	0.345035	0.138	0.113	0.480943
2810403A07Rik	0.000677087	0.344964	0.529	0.28	0.00379954
2900026A02Rik	0.00052008	0.344761	0.494	0.238	0.00303433
Ap3b1	0.00270604	0.344761	0.713	0.673	0.0123624
Dph3	0.00745466	0.344706	0.851	0.789	0.0286888
Dstn	0.0525934	0.344695	1	0.991	0.134394
Cfap36	0.00898723	0.344649	0.747	0.711	0.0335877
Chrac1	0.0283288	0.344443	0.793	0.836	0.0834685
Trnt1	0.00134967	0.344221	0.632	0.458	0.00685874
Grpel1	0.0275314	0.344083	0.897	0.935	0.0815906
Apoo	0.000650516	0.344056	0.713	0.506	0.00367201
Pyurf	0.00100982	0.344011	0.724	0.595	0.00536349
Fchsd2	0.000120316	0.343987	0.575	0.384	0.000882507
Rps3a1	2.52e-06	0.343949	1	1	3.06e-05
Ace	0.211292	0.343869	0.667	0.699	0.381685
Nop58	0.00128399	0.34332	0.943	0.884	0.00655548
Pfdn2	0.00266015	0.3433	0.931	0.958	0.0122038
Lamc2	0.0492461	0.343245	0.391	0.167	0.128241
Gna12	0.00281221	0.343124	0.54	0.315	0.0127484
Ckap2l	0.312728	0.343078	0.184	0.057	0.501192
Stox2	0.00614847	0.342617	0.437	0.173	0.0244882
Zcchc17	0.00712164	0.342574	0.724	0.735	0.0276296
Yap1	0.000160654	0.342539	0.598	0.372	0.00112753
Atp13a2	0.000512748	0.342539	0.494	0.399	0.00300301
Dnmt1	0.00962524	0.342539	0.425	0.301	0.0352761
Prss23	0.00222631	0.342395	0.437	0.202	0.0104712
Nudt21	0.0139177	0.342361	0.874	0.801	0.0476581
Pcm1	0.103789	0.342285	0.885	0.896	0.226516
Flnb	0.00372679	0.342264	0.471	0.244	0.0161932
Lman1	0.00851118	0.342241	0.885	0.911	0.0320922
Prkaca	0.000653057	0.342203	0.621	0.47	0.00368363
Ogt	0.0135812	0.34215	0.839	0.827	0.0466567
Cnpy2	0.0426267	0.341925	0.966	0.976	0.115326
Rtraf	0.0124654	0.341781	0.954	0.985	0.043464
Ssr4	0.0905264	0.341692	0.931	0.973	0.203446
Casz1	0.211568	0.341595	0.264	0.086	0.382002
Abcb8	0.000792256	0.341459	0.609	0.429	0.00434688
Mrto4	0.00143447	0.341386	0.897	0.744	0.00722721
Aimp2	0.00200115	0.341386	0.759	0.577	0.0095354
Brd4	0.0325519	0.341237	0.747	0.729	0.0933212
Lonp2	0.00121126	0.341198	0.667	0.557	0.00623831
Psmc1	0.0179361	0.341073	0.897	0.869	0.0579398
Ube2i	0.0225835	0.340936	0.92	0.943	0.0698242
Amot	0.00457692	0.340848	0.414	0.176	0.0192841
Gm53	0.00302337	0.340815	0.414	0.176	0.013537
Pxmp2	0.052542	0.340773	0.644	0.47	0.134329
Sdc2	0.00644483	0.340648	0.471	0.304	0.0254037
Tmem70	0.00376846	0.340602	0.747	0.658	0.0163399
Rab7	0.0490483	0.340552	0.862	0.902	0.127987
Dgat2	0.00277152	0.340485	0.609	0.402	0.0126088
Slc35a4	0.000498002	0.340421	0.644	0.557	0.00292787
Ar	0.0385991	0.340354	0.655	0.375	0.106541
Zfp106	0.0164241	0.340296	0.828	0.777	0.0542024
Ncl	0.0010199	0.340281	1	0.997	0.00540573
Atp5d	0.0501047	0.340243	1	0.997	0.129736
Arhgef2	0.00255479	0.340189	0.448	0.199	0.0117841
Pi4ka	0.00219166	0.340174	0.448	0.235	0.0103146
Rab14	0.0733275	0.340003	0.92	0.976	0.173351
Psme4	0.00311986	0.339996	0.621	0.56	0.0138434
Hnrnpul1	0.00565856	0.33997	0.667	0.61	0.0228949
Cdv3	0.0319556	0.339893	0.92	0.917	0.0921227
Kmt2e	0.0306245	0.33984	0.782	0.812	0.088896
Vps28	0.0111147	0.339832	0.874	0.851	0.0397705
Rap1gds1	0.000836933	0.339602	0.448	0.235	0.00455928
Fam58b	0.00108552	0.339602	0.563	0.449	0.00568653
Wdfy3	0.00143283	0.339602	0.575	0.405	0.00722625
Fggy	0.037431	0.339602	0.759	0.75	0.104107
Hpgd	0.115809	0.339602	0.299	0.065	0.245023
Kif11	0.298905	0.339602	0.218	0.057	0.486174
Mrpl52	0.0304743	0.339391	0.966	0.976	0.0885607
Ttc14	0.0195358	0.339348	0.793	0.771	0.0619295
Rps11	0.00725227	0.339288	1	1	0.028037
Cyb5b	0.0448032	0.339269	0.69	0.551	0.119899
Prkag1	0.00286151	0.339225	0.667	0.577	0.0129258
Fgfrl1	0.00187941	0.339008	0.437	0.211	0.00907984
Cdt1	0.0153411	0.338958	0.356	0.14	0.0514488
St6galnac3	0.0392241	0.338939	0.368	0.11	0.107955
Ebf1	0.157025	0.338939	0.241	0.062	0.307089
Sord	0.00627329	0.338753	0.586	0.429	0.0248815
Kat6a	0.001124	0.33872	0.598	0.449	0.0058574
Hnrnph3	0.00408365	0.338625	0.69	0.673	0.0175839
Ankrd17	0.0331531	0.338614	0.77	0.753	0.0946189
Pitpnb	0.00290308	0.338533	0.736	0.589	0.0130596
Aplp2	0.0846489	0.338533	0.943	0.914	0.193762
Sdhc	0.0677603	0.338533	0.92	0.89	0.16418
Ngdn	0.000633769	0.338401	0.759	0.533	0.00359073
Psmg3	0.000456472	0.33831	0.644	0.482	0.00272777
Nphs1	0.350693	0.338285	0.195	0.104	0.537791
Mrps6	0.00377124	0.338113	0.713	0.542	0.0163399
Rex1bd	0.056744	0.337917	0.862	0.89	0.142148
Fzr1	0.00192017	0.337855	0.586	0.473	0.00924173
Hmgn3	0.0246956	0.337749	0.425	0.122	0.0749893
1810037I17Rik	0.0101449	0.33749	0.908	0.854	0.0367999
Arid1b	0.0113293	0.33747	0.575	0.488	0.0403935
Mcrip1	0.0403712	0.337107	0.862	0.863	0.110201
Ggps1	0.000588265	0.336851	0.506	0.274	0.00337293
Loxl2	0.456529	0.336765	0.126	0.045	0.631196
Ssr1	0.00544664	0.336747	0.839	0.741	0.0221901
Rab8a	0.0494727	0.336735	0.805	0.815	0.128609
Hnrnpa0	0.0253226	0.33661	0.954	0.982	0.076227
Rhobtb1	0.030566	0.336542	0.46	0.283	0.0887599
Psma3	0.0147166	0.336497	0.966	0.976	0.0497602
Zfp945	0.00107574	0.336472	0.506	0.307	0.00565079
Mtdh	0.0156598	0.336316	0.954	0.946	0.0522425
Gins4	0.000198639	0.336276	0.598	0.399	0.00133998
Flywch1	0.000555579	0.336276	0.609	0.387	0.00320233
Nsmce1	0.00924219	0.336205	0.897	0.78	0.0342737
D10Jhu81e	0.0120063	0.336172	0.77	0.708	0.0421925
Epm2aip1	0.00278783	0.336112	0.586	0.455	0.0126529
Mphosph10	0.00200112	0.335972	0.736	0.539	0.0095354
Ap3d1	0.00905388	0.335913	0.667	0.562	0.0337885
Cox14	0.108279	0.335911	0.943	0.955	0.233317
Ndufs3	0.044459	0.335716	0.943	0.943	0.119061
Csde1	0.103156	0.335698	0.943	0.917	0.225328
Tfdp1	0.000447007	0.335619	0.713	0.396	0.00268591
Tmem45b	0.019313	0.335608	0.333	0.161	0.0614271
Pds5b	0.00168096	0.33554	0.575	0.39	0.00825682
Zfp704	0.142092	0.335449	0.874	0.824	0.285461
Pdk2	0.00681761	0.335397	0.391	0.193	0.0266259
Coprs	0.00252802	0.335363	0.632	0.438	0.0116959
Plod2	0.0277047	0.335356	0.632	0.44	0.0819772
Tmem53	0.000247512	0.335282	0.494	0.301	0.00161136
Mrpl48	0.00542799	0.335177	0.816	0.753	0.0221377
Mlec	0.491355	0.335162	0.897	0.911	0.658694
Igf2bp3	0.04714	0.334927	0.736	0.646	0.12441
Plekhg3	0.049177	0.334927	0.724	0.619	0.128149
Chst2	0.0583862	0.334899	0.333	0.086	0.145168
Slc19a1	0.0216642	0.334829	0.793	0.643	0.0674734
Klk8	0.230775	0.334756	0.23	0.057	0.40716
Lmo2	0.322789	0.334756	0.207	0.062	0.511948
Mpc1	0.0342993	0.33462	0.885	0.905	0.0970565
Foxd1	0.43853	0.334604	0.126	0.036	0.617025
Chd3	0.0427301	0.334579	0.793	0.699	0.115499
Pdia4	0.0871961	0.3345	0.908	0.869	0.198404
Isy1	0.000437905	0.334153	0.598	0.381	0.00263952
Rpgr	0.000269165	0.334141	0.483	0.289	0.00173899
Rnf26	0.000993017	0.334141	0.425	0.292	0.00528525
Mapre2	0.0145221	0.334126	0.402	0.161	0.0491769
Tuba1a	0.434625	0.333995	0.69	0.494	0.61389
Gm45051	0.000828531	0.333904	0.586	0.301	0.00451673
Tufm	0.0129458	0.333842	0.782	0.699	0.0449135
Csnk1a1	0.105885	0.333766	0.954	0.979	0.229801
Pla2g12a	0.0524357	0.333754	0.828	0.783	0.134179
Nsd2	0.00102325	0.33374	0.563	0.405	0.00541973
Timm17a	0.0229957	0.333716	0.897	0.842	0.0708123
Fam133b	0.0249183	0.333702	0.828	0.762	0.0754788
Eif1b	0.0160049	0.333648	0.828	0.842	0.053162
Yif1b	0.0809493	0.333589	0.862	0.836	0.187313
Mrpl57	0.0338341	0.333586	0.874	0.893	0.0960245
Cirbp	0.00124298	0.33356	0.632	0.446	0.00637162
Elp5	0.00309681	0.333458	0.736	0.589	0.013777
Psmb1	0.0090843	0.333407	1	0.982	0.0338689
Jmjd6	0.0033939	0.33328	0.805	0.604	0.0148651
Mbtps1	0.00327175	0.33313	0.678	0.506	0.0143713
Sfr1	0.154022	0.33313	0.862	0.967	0.303165
Polr2e	0.0178462	0.332926	0.885	0.908	0.0577405
Fgfr2	0.00218056	0.332807	0.483	0.241	0.0102868
Rp9	0.0490648	0.332741	0.92	0.926	0.127987
Mcrs1	0.00935545	0.332725	0.759	0.676	0.0345762
H2afj	0.0549158	0.332633	0.931	0.926	0.139027
Ift20	0.0248614	0.332522	0.931	0.884	0.0753733
Rpp21	0.0164142	0.332274	0.782	0.714	0.0542024
Ppp3cb	0.000969411	0.332208	0.632	0.426	0.00518489
Eif3b	0.00930288	0.332035	0.816	0.795	0.0343986
Furin	0.002262	0.331943	0.621	0.446	0.010626
Supt16	0.0322404	0.331676	0.793	0.744	0.0926713
Ppif	0.000483789	0.331554	0.609	0.342	0.00285749
Sulf2	0.112473	0.331372	0.287	0.071	0.239832
Echs1	0.00899128	0.331264	0.92	0.899	0.0335877
Gtf3c2	0.0148474	0.33122	0.563	0.449	0.0500349
Phgdh	0.0371468	0.33111	1	0.997	0.103505
Dnpep	0.0321172	0.33097	0.839	0.812	0.0924215
Gspt1	0.0170426	0.330863	0.92	0.911	0.0556176
Sdha	0.0230728	0.330843	0.92	0.911	0.071021
Carnmt1	0.00286978	0.330756	0.782	0.613	0.0129555
Pkig	0.259018	0.330722	0.816	0.884	0.440808
Pigu	0.000659938	0.330612	0.483	0.214	0.00371695
Slc7a7	0.216684	0.330482	0.276	0.039	0.388669
Anp32a	0.0781978	0.330415	0.954	0.976	0.182605
Ncbp2	0.00479024	0.330394	0.782	0.685	0.0200833
Abcd4	0.00831667	0.330368	0.54	0.387	0.0314519
Dnajc2	0.0260771	0.330242	0.897	0.789	0.078166
Ppm1g	0.00969257	0.330221	0.793	0.655	0.0354451
Hmg20a	0.0010297	0.330177	0.575	0.396	0.00544635
Gna11	0.00962108	0.330165	0.805	0.732	0.0352761
Cntfr	0.115452	0.330149	0.299	0.083	0.24467
Hsbp1	0.380335	0.329953	0.966	0.973	0.565325
Chic2	0.0013442	0.329924	0.713	0.488	0.00684002
Dnajb1	0.03141	0.329924	0.632	0.461	0.090831
Rps27	0.0436753	0.329912	1	1	0.117456
Rps8	0.199898	0.329885	1	1	0.366999
Pdlim2	0.255227	0.32984	0.172	0.077	0.436789
Amd1	0.000154279	0.329793	0.552	0.286	0.00108979
Ikbkb	0.00368951	0.329759	0.54	0.414	0.0160586
Cct7	0.026031	0.329638	0.954	0.976	0.0780829
Carmil1	0.00426906	0.329552	0.46	0.256	0.0182384
Rbmx	0.0123807	0.329552	0.828	0.702	0.0433467
Cops6	0.0291827	0.329438	0.943	0.955	0.0855557
Nr2c2	0.00117141	0.329336	0.552	0.36	0.00606579
Arl8a	0.00929224	0.329283	0.402	0.176	0.0343921
Rfxap	0.0131849	0.329266	0.759	0.702	0.0455366
Timm22	0.015168	0.329167	0.759	0.705	0.0509355
Fip1l1	0.0164609	0.328979	0.828	0.765	0.0542289
Mylk3	0.154254	0.328922	0.322	0.045	0.303466
Cmbl	0.0398361	0.32852	0.368	0.17	0.109206
N4bp1	0.00525434	0.328193	0.621	0.467	0.0215908
Sc5d	0.00412716	0.328144	0.437	0.155	0.0177213
Mtif2	0.00107876	0.328131	0.644	0.44	0.00566273
Mosmo	0.000603478	0.327989	0.506	0.354	0.00344722
Ppp3ca	0.0147881	0.327929	0.759	0.625	0.0498787
Pqlc1	0.00109604	0.327906	0.471	0.304	0.00573375
Ube2k	0.0348525	0.327891	0.897	0.821	0.0984032
Cabin1	0.00197046	0.327887	0.701	0.512	0.00942445
Ralbp1	0.150177	0.327853	0.851	0.807	0.296974
Dgkd	0.00151477	0.327814	0.448	0.268	0.00759172
Bach1	0.00161888	0.327814	0.506	0.321	0.0080033
Plekha5	0.0189227	0.327814	0.563	0.452	0.0605261
Sgpp1	0.0269796	0.327814	0.517	0.446	0.0802042
Abcf1	0.0499724	0.327758	0.897	0.911	0.129502
Trim8	0.00172104	0.327649	0.552	0.39	0.00841041
Uck1	0.000286609	0.327626	0.54	0.301	0.00183463
Ctdsp1	0.00512336	0.327607	0.655	0.557	0.0211893
Cldnd1	0.00128526	0.327554	0.828	0.56	0.00655756
Clk1	0.119656	0.3275	0.862	0.866	0.251106
Gltp	0.00160023	0.327282	0.517	0.327	0.00793161
Plk4	0.0511903	0.327252	0.333	0.125	0.131644
Papola	0.0218736	0.327234	0.92	0.863	0.0680699
Spata6	0.00153758	0.327159	0.563	0.271	0.00768087
Bub1b	0.378397	0.327093	0.172	0.048	0.563649
Srpk1	0.00959163	0.327082	0.874	0.866	0.0352277
Slc31a1	0.00267095	0.326816	0.644	0.503	0.012246
Gcn1l1	0.00834913	0.326593	0.713	0.533	0.0315434
Commd1	0.0431645	0.326513	0.908	0.908	0.11641
Aip	0.00182292	0.326466	0.632	0.503	0.00886298
Ssbp4	0.0116126	0.326395	0.713	0.58	0.0411284
Ptbp2	0.000448896	0.326386	0.494	0.262	0.00269091
Serp1	0.0552335	0.326357	0.92	0.902	0.139461
Stag1	0.0131937	0.326211	0.793	0.631	0.0455464
Cmc2	0.00611585	0.326058	0.724	0.586	0.0243964
Rhot2	0.00136391	0.325922	0.437	0.301	0.0069127
Psmb4	0.014435	0.325868	0.966	0.961	0.0489905
Psmd12	0.0085309	0.325487	0.931	0.923	0.0321507
Atg4d	0.00122411	0.325464	0.506	0.292	0.00629599
Ncbp1	0.00051812	0.325452	0.563	0.378	0.00302983
2022-03-02	0.0108428	0.325421	0.966	0.958	0.0389069
Usp10	0.0333445	0.325417	0.77	0.667	0.0949523
Puf60	0.0158404	0.32539	0.874	0.896	0.05273
Slc25a21	0.0161882	0.325086	0.391	0.14	0.0536541
Casd1	0.00277705	0.325011	0.46	0.295	0.0126257
Hpf1	0.00798666	0.324968	0.782	0.688	0.0304199
Itga3	0.133306	0.324672	0.276	0.14	0.272423
Grsf1	0.17286	0.324663	0.759	0.628	0.329222
[truncated: 5,677 more rows]

## Sheet: N.tubule1_PCT.MutVsCTRL.DEGs
Gene	p_val	avg_logFC	pct.1	pct.2	p_val_adj
Mt1	1.42e-16	1.46509	0.872	0.704	3.05e-14
Mt2	6.19e-19	1.36893	0.553	0.223	2.6e-16
Ttr	NA	1.2976	0.362	0.058	NA
Gm10260	3.37e-07	1.13753	0.404	0.015	7.8e-06
Miox	1.54e-07	1.0787	0.723	0.335	3.94e-06
Slc7a8	1.97e-22	0.99187	0.787	0.354	1.45e-19
Xist	0.00151071	0.954927	0.255	0.107	0.00707001
Eif3j1	1e-41	0.858879	0.862	0.529	1.47e-38
Tmsb4x	2.26e-08	0.792284	0.83	0.699	7.56e-07
Cdkn1c	NA	0.761151	0.745	0.485	NA
Slc26a1	6.19e-17	0.738845	0.851	0.505	1.52e-14
Col3a1	3.67e-06	0.722786	0.404	0.189	5.71e-05
mt-Nd4l	3.01e-17	0.722061	0.979	0.956	9.04e-15
Cela1	5.71e-09	0.719891	0.915	0.757	2.36e-07
Gsta4	1.42e-20	0.71666	0.862	0.558	6.94e-18
Gsn	1.59e-16	0.710747	0.617	0.233	3.12e-14
mt-Nd4	5.95e-17	0.697049	1	0.99	1.52e-14
mt-Nd3	5.64e-18	0.674904	0.989	0.956	2.07e-15
mt-Nd1	1.45e-16	0.673809	1	0.995	3.05e-14
Afp	2.13e-16	0.611845	0.957	0.786	3.91e-14
Col1a2	7.72e-07	0.603638	0.5	0.248	1.54e-05
Kcnq1ot1	1.23e-07	0.58914	0.745	0.631	3.26e-06
Hist1h2ap	NA	0.582878	0.426	0.199	NA
Scd2	1.07e-07	0.577282	0.968	0.835	2.92e-06
Col1a1	2.95e-06	0.568606	0.468	0.223	4.73e-05
D630023F18Rik	8.66e-05	0.564584	0.362	0.107	0.000759831
mt-Nd2	1.55e-13	0.564546	1	1	1.98e-11
Sord	4.06e-12	0.548724	0.957	0.811	3.88e-10
Fut9	5.23e-10	0.541439	0.968	0.951	2.85e-08
mt-Cytb	6.92e-13	0.536867	1	0.995	7.82e-11
Fbp2	4.94e-12	0.531241	0.883	0.689	4.31e-10
Pcsk9	2.01e-10	0.52121	0.617	0.272	1.18e-08
mt-Atp8	4.09e-12	0.504719	0.989	0.917	3.88e-10
Nat8	0.00331151	0.504412	0.628	0.379	0.0128228
Ncam1	2.08e-09	0.497447	0.766	0.68	1e-07
Gpx3	0.0270153	0.495643	0.926	0.85	0.0572031
Akr1c19	1.9e-10	0.491642	0.734	0.471	1.17e-08
Gm26917	2.37e-05	0.48601	0.66	0.524	0.000264584
Emid1	9.9e-08	0.48367	0.745	0.544	2.74e-06
Tubb4b	4.59e-13	0.482476	0.968	0.908	5.4e-11
Hmox1	7.82e-06	0.482084	0.415	0.204	0.000104419
mt-Co3	7.38e-11	0.480775	1	1	5.17e-09
Penk	NA	0.480758	0.213	0.112	NA
Abcc2	4.68e-09	0.478207	0.83	0.612	1.97e-07
Cyp24a1	0.0841899	0.475634	0.202	0.126	0.128337
Fcgrt	7.99e-07	0.474426	0.585	0.359	1.59e-05
Dpep1	0.000255945	0.470142	0.574	0.369	0.00177496
Cyp2d26	1.5e-05	0.46517	0.968	0.903	0.000181234
Mfsd4b5	7.71e-07	0.462113	0.606	0.296	1.54e-05
Spp1	0.0111021	0.459	0.66	0.505	0.0304659
mt-Co2	1.37e-09	0.457025	1	1	6.85e-08
Cndp2	7.93e-10	0.453451	0.979	0.966	4.09e-08
Ugt2b34	0.0109023	0.45286	0.34	0.136	0.0300863
H19	0.000173043	0.449497	0.511	0.354	0.00132097
Hsd3b2	1.9e-06	0.448912	0.5	0.146	3.28e-05
Acta2	0.000242163	0.443655	0.511	0.291	0.00171086
mt-Nd5	1.54e-09	0.442735	0.989	0.966	7.56e-08
Slc7a7	0.00130309	0.435611	0.766	0.587	0.00631113
Ugt2b37	0.000156998	0.43473	0.755	0.485	0.00122392
Smarca4	5.6e-11	0.433327	0.723	0.413	4.33e-09
Dhcr24	4.29e-09	0.427906	0.787	0.65	1.85e-07
Zeb2	1.83e-05	0.426234	0.521	0.354	0.000214225
Lrp2	5.59e-06	0.426129	1	0.976	7.98e-05
Paqr9	8.32e-11	0.418647	0.713	0.524	5.68e-09
Slc5a2	0.0769831	0.417144	0.287	0.155	0.12022
Acmsd	0.031608	0.413428	0.564	0.393	0.06389
Cald1	0.0210411	0.411793	0.34	0.146	0.0480369
Gm16010	7.72e-05	0.411068	0.83	0.607	0.000693685
Cdh16	2.85e-12	0.410299	0.957	0.917	2.89e-10
mt-Atp6	9.78e-08	0.407809	1	1	2.74e-06
Ctsb	6.99e-10	0.404778	0.968	0.893	3.67e-08
Tmem8	3.55e-08	0.40017	0.564	0.267	1.1e-06
Slc13a1	5.45e-07	0.39839	0.617	0.383	1.16e-05
Igfbp4	5.94e-09	0.398229	0.989	0.879	2.42e-07
Gpd1	4.55e-12	0.393715	0.968	0.888	4.18e-10
Mlec	8.75e-15	0.391804	0.968	0.888	1.29e-12
Mfsd4b1	1.34e-05	0.38728	0.809	0.617	0.000164003
Slc3a2	1.92e-07	0.386699	0.926	0.888	4.7e-06
Fam151a	4.65e-05	0.380939	0.457	0.214	0.000458486
Sparc	0.000664297	0.380224	0.702	0.549	0.00374735
Col4a1	7.26e-09	0.379116	0.957	0.937	2.86e-07
C1qtnf12	2.26e-07	0.379116	0.894	0.733	5.41e-06
Spp2	0.00121122	0.378731	1	0.985	0.00594288
Acss1	9.07e-05	0.371817	0.468	0.218	0.000791064
Msmo1	6.34e-06	0.370606	0.691	0.534	8.87e-05
Slc5a12	0.0729673	0.370458	0.33	0.194	0.115607
Ccar1	4.1e-09	0.369857	0.787	0.714	1.8e-07
Pcx	3.68e-05	0.36534	0.957	0.937	0.000377305
Fasn	2.25e-06	0.364851	0.649	0.393	3.8e-05
Lars2	0.00018793	0.364466	0.915	0.84	0.00140541
L3hypdh	2.71e-09	0.359334	0.809	0.597	1.28e-07
Pebp1	4.26e-28	0.35872	0.989	0.995	4.18e-25
Cttnbp2	0.000137447	0.358612	0.479	0.233	0.00109771
AC149090.1	7.69e-05	0.358063	0.628	0.379	0.000693158
Sec61a1	1.79e-08	0.357875	0.723	0.602	6.12e-07
Clcn5	1.76e-07	0.357806	0.755	0.646	4.37e-06
Cfi	3.65e-06	0.357702	0.777	0.558	5.7e-05
Tuba4a	4.4e-08	0.355312	0.957	0.893	1.33e-06
Gm10639	6.59e-06	0.354964	0.989	0.951	9.09e-05
Sfpq	2.36e-08	0.353118	0.787	0.636	7.79e-07
Nhej1	1.32e-06	0.351142	0.543	0.306	2.42e-05
Fbxo9	3.96e-09	0.350382	0.691	0.544	1.79e-07
Haao	0.000575587	0.34964	0.415	0.117	0.00334318
Anks3	2.61e-08	0.348963	0.606	0.34	8.44e-07
Slc2a2	1.31e-06	0.347957	0.883	0.777	2.42e-05
Gng11	0.00175918	0.346681	0.447	0.199	0.00791766
Uba52	3.86e-16	0.341878	0.947	0.908	6.67e-14
Gatsl2	8.2e-07	0.341089	0.628	0.379	1.62e-05
Tmem37	2.28e-06	0.340804	0.957	0.966	3.83e-05
Chchd7	2.09e-11	0.340057	0.904	0.82	1.68e-09
Pdp2	3.52e-07	0.338936	0.553	0.316	8.07e-06
Srrt	6.13e-08	0.338842	0.606	0.403	1.8e-06
Pdzk1ip1	4.78e-06	0.338015	0.989	0.99	7.12e-05
Sec31a	3.66e-09	0.336033	0.809	0.694	1.71e-07
Trabd2b	2.44e-07	0.334093	0.745	0.592	5.75e-06
Ptprf	2.61e-08	0.333699	0.84	0.66	8.44e-07
Car12	0.000341022	0.331661	0.862	0.748	0.0022125
mt-Co1	7.06e-06	0.331632	1	0.995	9.56e-05
Enpp2	1.06e-05	0.33131	0.904	0.796	0.000134876
Ttc7	1.08e-05	0.331048	0.447	0.277	0.000136843
Sirt7	9.98e-08	0.330858	0.649	0.379	2.74e-06
Nectin3	2.8e-08	0.330275	0.819	0.617	8.95e-07
Dab2	2.64e-07	0.330197	0.979	0.942	6.16e-06
Lgals1	0.00466377	0.32977	0.479	0.451	0.0162789
Trpv4	1.14e-07	0.329519	0.681	0.5	3.06e-06
Steap2	9.92e-07	0.328315	0.745	0.607	1.88e-05
Lsp1	0.0110616	0.327658	0.362	0.282	0.0304117
Sypl2	6.37e-06	0.327291	0.511	0.32	8.87e-05
Mvk	1.07e-06	0.326062	0.574	0.393	1.99e-05
2900097C17Rik	1.21e-08	0.326006	0.809	0.583	4.35e-07
Anxa5	1.87e-05	0.325812	0.798	0.714	0.000217598
Ddx6	3.34e-08	0.325049	0.713	0.524	1.04e-06
Gm42418	0.11372	0.324951	1	1	0.161917
Aes	2.63e-15	0.324858	0.989	0.961	4.07e-13
Agrn	6.2e-07	0.324264	0.798	0.665	1.29e-05
Mdk	0.000714033	0.323976	0.617	0.432	0.00394696
Usp7	1.82e-08	0.322097	0.745	0.553	6.16e-07
Cldn10	1.02e-08	0.321312	0.947	0.888	3.75e-07
Aldh16a1	1.75e-07	0.320934	0.681	0.49	4.37e-06
Wdfy3	6.48e-06	0.320791	0.606	0.427	8.99e-05
Myo9a	1.01e-05	0.318492	0.787	0.631	0.000129561
Gcnt1	2.16e-05	0.318456	0.926	0.83	0.000246975
Cluh	2.35e-06	0.31761	0.755	0.602	3.93e-05
Pah	0.00625396	0.316637	0.532	0.32	0.0200879
Dcn	0.0950853	0.315458	0.191	0.083	0.141211
Fdft1	2.96e-06	0.314578	0.617	0.417	4.73e-05
Tpp1	2.8e-06	0.314229	0.819	0.733	4.55e-05
Alcam	0.000291209	0.313787	0.691	0.568	0.00195756
Wbp1l	1.89e-06	0.313158	0.564	0.277	3.28e-05
Ldlr	1.3e-05	0.313158	0.553	0.233	0.000161717
Tardbp	6.25e-08	0.312794	0.84	0.675	1.82e-06
Arhgef2	1.01e-05	0.311908	0.564	0.311	0.000129561
Il6st	1.03e-06	0.311864	0.681	0.442	1.93e-05
Cgnl1	4.99e-05	0.309158	0.617	0.374	0.000489085
Hdc	7.04e-06	0.308308	0.968	0.84	9.56e-05
Cnot6	1.11e-07	0.306661	0.809	0.694	2.99e-06
Mvd	9.35e-06	0.305884	0.628	0.602	0.000121025
Ascc1	3.13e-08	0.304621	0.957	0.898	9.91e-07
Plcb1	3.56e-05	0.304215	0.5	0.262	0.000367149
Tmem27	8.19e-05	0.302498	1	1	0.000729777
Uck1	4.42e-06	0.301249	0.574	0.291	6.62e-05
Asl	0.00030898	0.30068	0.894	0.845	0.00202699
Cab39l	0.00251481	0.300283	0.426	0.33	0.0103371
Ccnd2	0.0218228	0.300024	0.351	0.16	0.049185
Ass1	0.000867754	0.298554	1	0.981	0.00461181
Slc36a1	0.00246338	0.298048	0.362	0.141	0.0101684
Palm3	5.25e-05	0.297181	0.809	0.66	0.000507909
Aldh8a1	0.0164541	0.296878	0.33	0.189	0.0407402
Abhd14a	3.75e-06	0.296441	0.745	0.602	5.77e-05
4833439L19Rik	2.68e-05	0.295711	0.968	0.917	0.000296069
Tbx2	0.00229798	0.295196	0.489	0.214	0.00959341
Xpr1	4.99e-06	0.29517	0.702	0.505	7.34e-05
Vim	0.000482285	0.294599	0.596	0.456	0.00293465
Phgdh	9.37e-07	0.293075	0.989	0.888	1.8e-05
Slc18a1	0.00336486	0.293072	0.574	0.437	0.0128935
Idh1	4.64e-07	0.292484	1	1	1.01e-05
Vldlr	1.76e-06	0.292398	0.862	0.699	3.1e-05
Arl3	9.35e-09	0.291958	0.904	0.772	3.52e-07
Col18a1	1.37e-05	0.290843	0.809	0.68	0.000166176
Ugt2b5	0.00363618	0.290652	0.372	0.296	0.0135619
Xylb	1.33e-05	0.290613	0.809	0.65	0.000163853
Acsl4	0.0001433	0.290563	0.564	0.456	0.00113215
Akr1a1	8.07e-05	0.288959	1	0.995	0.000723341
Slc35e3	0.00841104	0.288462	0.372	0.083	0.0249194
Elovl1	3.78e-07	0.287664	0.84	0.733	8.55e-06
Fam120a	1.26e-06	0.287331	0.691	0.612	2.34e-05
Dst	3.68e-05	0.287042	0.819	0.733	0.000377305
Cntfr	0.00450671	0.287001	0.362	0.146	0.0159088
Apbb2	2.18e-06	0.286495	0.723	0.485	3.7e-05
Tpm3-rs7	0.000128799	0.285985	0.521	0.267	0.0010515
Spink1	2.42e-06	0.285909	1	0.976	4.02e-05
Rps19bp1	3.56e-07	0.28559	0.734	0.621	8.12e-06
Prodh2	0.0194454	0.285173	0.883	0.752	0.0452853
Plekhg3	2.85e-06	0.285116	0.777	0.646	4.6e-05
Twf1	5.94e-08	0.28511	0.894	0.752	1.78e-06
Nisch	1.91e-06	0.284689	0.904	0.84	3.28e-05
Slc6a8	6.95e-05	0.284425	0.67	0.495	0.000638745
Txnip	0.0777106	0.283391	0.245	0.117	0.121163
Plekha1	3.49e-05	0.282785	0.511	0.311	0.000362391
1500011B03Rik	0.00787385	0.282303	0.362	0.121	0.0238079
Acsl3	0.000233333	0.281788	0.681	0.675	0.0016726
Chd3	0.00109686	0.281573	0.872	0.796	0.00552947
Dleu7	0.000210637	0.28123	0.511	0.35	0.00153233
Tfg	2e-07	0.281122	0.734	0.709	4.87e-06
Rogdi	4.3e-06	0.281055	0.777	0.621	6.48e-05
C1s1	0.0583545	0.280676	0.287	0.092	0.0976673
Ank3	3.41e-06	0.280632	0.894	0.777	5.37e-05
Med24	0.0034301	0.27969	0.351	0.257	0.0130062
Ctnnb1	3.71e-08	0.278832	0.915	0.791	1.14e-06
Slc22a1	5.22e-05	0.278646	0.957	0.908	0.000506709
Cat	8.84e-07	0.278402	0.787	0.675	1.71e-05
Gatm	0.0511819	0.277629	0.968	0.874	0.0893783
Aadac	1.93e-06	0.277432	0.787	0.665	3.3e-05
Bcar1	8.89e-06	0.277382	0.638	0.451	0.000117032
Pcyt2	1.06e-05	0.276754	0.777	0.689	0.000134876
Cpd	2.78e-05	0.276659	0.638	0.388	0.000305663
Slc7a13	0.016804	0.276653	0.713	0.67	0.0413972
Faah	5.74e-05	0.276005	0.511	0.32	0.000549079
Acot4	1.67e-06	0.275627	0.819	0.694	2.97e-05
Glrx	5.21e-05	0.274923	0.819	0.689	0.000506709
Atp1b3	1.88e-05	0.274874	0.553	0.335	0.000218137
Slc34a1	0.000156602	0.274309	1	0.956	0.00122392
Zfr	2.47e-06	0.273756	0.66	0.505	4.07e-05
Gjb1	0.000176651	0.273756	0.809	0.592	0.00134502
Akr1c21	0.111761	0.273756	0.202	0.16	0.160144
Snx6	1.37e-10	0.272926	0.947	0.951	8.78e-09
Fn1	0.00708811	0.272781	0.404	0.359	0.0220461
Eif4g1	5.86e-06	0.272594	0.957	0.82	8.28e-05
Birc6	9.06e-06	0.271584	0.745	0.631	0.000118329
Ddx3x	3.84e-05	0.269861	0.862	0.748	0.000388148
Hdac1	6.14e-06	0.269179	0.638	0.442	8.63e-05
Acly	5.4e-06	0.269115	0.628	0.466	7.82e-05
Ywhag	5.49e-06	0.26905	0.649	0.461	7.91e-05
Sec61g	2.72e-12	0.268931	0.989	0.971	2.86e-10
Ccser2	0.000427815	0.268506	0.649	0.5	0.00267721
Kmt2a	0.000152025	0.267992	0.5	0.272	0.00119147
Tomm70a	1.51e-06	0.267268	0.84	0.67	2.74e-05
Lamtor4	1.43e-07	0.267192	0.968	0.898	3.75e-06
Fdps	0.000356494	0.266696	0.745	0.66	0.00228265
Cdc37l1	7.02e-06	0.266237	0.681	0.602	9.56e-05
Coq8a	0.000236458	0.266237	0.479	0.209	0.00168269
0610005C13Rik	9.59e-09	0.266171	0.979	0.947	3.57e-07
Nr2f2	2.49e-05	0.266019	0.787	0.573	0.000276221
Cyp4a10	0.00098872	0.264945	0.606	0.432	0.00513401
Smtnl2	8.92e-06	0.264413	0.777	0.621	0.000117032
Maged1	3.32e-05	0.263921	0.787	0.66	0.000349647
Lnpep	0.000251466	0.262906	0.479	0.257	0.00175548
Habp2	7.49e-05	0.262662	0.691	0.549	0.000679565
Dmxl1	3.28e-05	0.262582	0.702	0.573	0.000346719
Ywhab	8.56e-09	0.261835	0.926	0.864	3.31e-07
Mid1ip1	0.00110252	0.260898	0.447	0.243	0.00554847
Clic6	0.00138843	0.260852	0.426	0.199	0.0065816
4930402H24Rik	4.12e-05	0.260448	0.617	0.442	0.000410227
Dnmt3a	7.53e-05	0.25977	0.564	0.417	0.000680904
Brd3	0.000177241	0.259643	0.543	0.359	0.00134603
Slc26a6	0.00623563	0.259099	0.33	0.194	0.0200729
Tysnd1	1.08e-05	0.258763	0.84	0.748	0.000136843
Cotl1	3.72e-06	0.258592	0.989	0.913	5.75e-05
Mfsd1	1.72e-05	0.258488	0.84	0.825	0.000204128
Vcp	8.98e-09	0.258283	0.979	0.961	3.43e-07
Slc25a19	9.19e-06	0.257882	0.713	0.49	0.000119457
Sgk2	0.00041588	0.257845	0.596	0.451	0.00261729
Zfp395	1.81e-05	0.257803	0.574	0.417	0.000212841
Ctsd	1.51e-06	0.255859	0.989	0.908	2.74e-05
Cuedc2	1.52e-07	0.255612	0.883	0.811	3.92e-06
H2afz	7.19e-07	0.255291	0.968	0.903	1.47e-05
Igf2r	0.000410398	0.253953	0.681	0.553	0.00258832
Arf5	4.09e-07	0.2526	0.883	0.888	9.03e-06
Slc25a51	0.000141551	0.252465	0.809	0.714	0.00112437
Arhgef7	0.000354589	0.252172	0.457	0.277	0.00228265
Gstm2	0.119747	0.251777	0.266	0.083	0.168471
Prdx4	0.000189457	0.251634	0.713	0.592	0.00141324
Grn	0.000127474	0.251416	0.755	0.636	0.00104358
Bpnt1	3.82e-05	0.251323	0.862	0.728	0.000387038
1700011H14Rik	8.79e-07	0.250898	0.968	0.883	1.71e-05
Dbi	7.3e-09	0.250707	1	1	2.86e-07
Svil	7.25e-05	0.25069	0.521	0.345	0.000661684
Mapt	0.000283705	0.25069	0.5	0.35	0.00191809
Pik3r1	0.00104204	0.250499	0.426	0.291	0.00532619
Col4a2	2.36e-05	0.250379	0.894	0.84	0.000264584
Atp5g3	7.28e-11	0.249405	1	0.995	5.17e-09
Spns1	8.45e-05	0.249227	0.787	0.655	0.000749866
Aldh1a7	0.080564	0.249063	0.277	0.141	0.124489
Tns1	8.51e-05	0.248914	0.798	0.699	0.000751028
Defb19	0.135436	0.24872	0.681	0.612	0.185311
Usp50	2.91e-05	0.248039	0.649	0.553	0.00031634
3632451O06Rik	0.0300419	0.248003	0.351	0.117	0.0615712
Slc4a4	0.00323307	0.247883	0.979	0.976	0.0125688
Zfp704	1.34e-05	0.247376	0.862	0.748	0.000164003
Cpox	0.000276424	0.247318	0.904	0.83	0.00189656
Cldn2	2.01e-05	0.247313	0.979	0.917	0.000231246
Sod1	0.000323576	0.246727	0.777	0.694	0.00210862
Pla1a	0.00394771	0.246692	0.596	0.5	0.0145393
Cdkal1	0.00183167	0.246053	0.532	0.325	0.00815649
Fkbp4	3.95e-07	0.245814	0.936	0.898	8.8e-06
Sympk	0.000213615	0.245585	0.489	0.291	0.00154634
Dido1	0.000438762	0.245585	0.489	0.257	0.00271478
Mfsd4b3	0.00678753	0.245585	0.362	0.175	0.0213582
Ddc	0.011617	0.245585	0.351	0.17	0.0317012
Ralb	0.000170648	0.244613	0.723	0.558	0.00130608
Tpm2	0.0329828	0.244557	0.362	0.204	0.0658983
2022-09-04	5.99e-05	0.244432	0.723	0.549	0.00056076
Wdr4	0.00102191	0.24408	0.447	0.291	0.00525488
Srsf6	5.12e-05	0.243942	0.713	0.689	0.000500178
Anxa6	0.00743053	0.243942	0.394	0.184	0.0228434
Trim35	9.53e-05	0.24345	0.681	0.5	0.000821306
Slc25a15	0.000779091	0.243075	0.617	0.408	0.00422463
Rex1bd	1.8e-06	0.242886	0.851	0.757	3.15e-05
Gm2a	0.00355369	0.24217	0.734	0.583	0.0133218
Srebf1	0.000136085	0.242137	0.606	0.369	0.0010898
Cltc	7.34e-05	0.241468	0.968	0.932	0.000668028
Smim4	6.85e-06	0.241427	0.872	0.835	9.4e-05
Pm20d1	0.000256252	0.240966	0.574	0.354	0.00177496
Dynll2	6.59e-05	0.240843	0.745	0.602	0.000609358
Rpn1	4.83e-06	0.240371	0.894	0.874	7.14e-05
Hnf4a	4.26e-06	0.240054	0.926	0.908	6.45e-05
Got2	4.48e-05	0.239447	0.957	0.981	0.000443459
Meg3	0.0619761	0.23915	0.277	0.141	0.102158
Rab1b	5.5e-05	0.238416	0.755	0.694	0.00052844
Ptn	NA	0.237777	0.33	0.184	NA
Slc7a9	0.000760673	0.237651	0.723	0.631	0.00414003
Slc37a4	1.66e-05	0.237516	0.872	0.898	0.000198284
Sptbn1	2.18e-05	0.237198	0.904	0.864	0.000247869
Dync1h1	0.000164093	0.236982	0.734	0.655	0.00125919
Pdzd3	0.000250893	0.236889	0.606	0.5	0.00175548
Gnpat	0.000138778	0.236616	0.596	0.388	0.00110534
Ftl1	0.000204229	0.236444	1	1	0.00150433
Chordc1	0.000126998	0.236233	0.596	0.417	0.00104259
Lrrc58	4.07e-05	0.235841	0.862	0.762	0.000408082
Atox1	8.79e-07	0.23503	0.957	0.947	1.71e-05
Papd7	0.00371907	0.234799	0.383	0.194	0.0138359
Mxd4	0.00054871	0.234326	0.564	0.34	0.00323178
Slc22a23	0.00156012	0.234048	0.426	0.262	0.00723216
Sema4a	0.000179826	0.233934	0.606	0.383	0.00135515
Marcks	0.0246419	0.23234	0.33	0.252	0.053926
Cep170b	0.0004988	0.232319	0.447	0.262	0.00300417
Lpgat1	0.000298948	0.231458	0.691	0.626	0.00199194
Rab1a	9.65e-05	0.231251	0.915	0.864	0.000826472
Zhx3	0.000303798	0.231063	0.532	0.398	0.00200193
Hist3h2ba	0.395837	0.23079	0.181	0.039	0.430994
Nynrin	0.00613147	0.230547	0.394	0.218	0.0198026
Slc35b2	3.08e-05	0.230452	0.691	0.563	0.000330011
Uap1l1	0.00419278	0.230271	0.702	0.607	0.0150827
Maf	0.00412857	0.23006	0.957	0.845	0.0149616
Basp1	0.280194	0.229973	0.138	0.112	0.325619
Slc9a5	0.454863	0.229739	0.191	0.01	0.483487
Aqp3	0.139654	0.22944	0.266	0.073	0.19002
Glyat	0.000643659	0.229357	0.851	0.796	0.00366611
Romo1	1.66e-10	0.229261	0.979	0.976	1.04e-08
Zmiz2	0.000307607	0.229151	0.574	0.32	0.0020225
Tpcn1	0.00213301	0.229108	0.745	0.714	0.00908236
Ethe1	0.00206014	0.228964	0.468	0.316	0.00883906
Pom121	0.00190681	0.228942	0.447	0.189	0.00833947
Nid2	0.00431442	0.228732	0.362	0.214	0.0154151
Kctd17	0.000615395	0.228712	0.585	0.408	0.00352563
Rere	0.000101354	0.228699	0.691	0.519	0.00086092
Ppt2	0.000101844	0.228238	0.904	0.854	0.000862589
Elovl6	3.27e-05	0.227937	0.819	0.704	0.000346719
Cpn1	0.000363343	0.227508	0.957	0.927	0.00232144
Mlf2	1.95e-05	0.227493	0.936	0.874	0.000225885
Cryl1	0.0184361	0.227252	0.904	0.796	0.043899
Ganab	3.4e-05	0.226609	0.777	0.597	0.000355483
Celf1	6.07e-05	0.22656	0.787	0.592	0.00056465
Luc7l3	5.91e-05	0.22641	0.798	0.587	0.000554924
Gpr135	0.253169	0.226128	0.223	0.044	0.301671
Trim63	0.0187778	0.225994	0.362	0.146	0.0443913
Sbf1	0.00663528	0.225965	0.383	0.18	0.0209729
Bicc1	0.000130256	0.225782	0.883	0.83	0.0010546
Nmnat3	0.00116015	0.225656	0.596	0.442	0.00574987
Selenot	5.34e-06	0.225569	0.936	0.864	7.8e-05
Chd4	9.7e-05	0.225539	0.894	0.791	0.000828595
Arih1	0.000157718	0.224966	0.606	0.451	0.00122628
Cdipt	0.000242911	0.224966	0.564	0.422	0.00171203
Tkfc	7.09e-05	0.224581	0.968	0.947	0.000649003
Tex264	5.82e-05	0.224464	0.755	0.675	0.000551819
Safb	0.000144751	0.224319	0.66	0.466	0.00114054
Pbx1	0.0035121	0.224295	0.511	0.374	0.0131827
Ublcp1	0.000512301	0.22414	0.479	0.35	0.00306027
Fam98a	0.00524219	0.224032	0.404	0.233	0.017709
Ptbp1	9.24e-05	0.223823	0.691	0.549	0.000801343
Rrbp1	3.87e-05	0.223805	0.936	0.864	0.000389966
Cmtm4	0.000302313	0.22358	0.596	0.466	0.00199663
Zc3h18	0.000728301	0.22358	0.596	0.442	0.00400838
Slc16a12	0.00260782	0.223385	0.723	0.655	0.0105861
Abcd4	0.0148244	0.223385	0.681	0.529	0.0379265
Clec18a	0.000163187	0.223096	0.883	0.723	0.00125881
Lonp2	0.000191949	0.222587	0.723	0.553	0.0014282
Tmtc3	0.000484245	0.222403	0.489	0.316	0.00294049
Gamt	0.0014992	0.222168	0.574	0.374	0.00702735
Srek1ip1	1.32e-05	0.222088	0.84	0.723	0.000162922
Mmp14	0.0168507	0.222054	0.383	0.175	0.0414429
Mrps21	3.95e-07	0.221632	0.968	0.956	8.8e-06
Npepps	0.000475685	0.221041	0.606	0.476	0.00290049
Dmtn	0.00167448	0.221027	0.5	0.35	0.00761812
Kcnj16	0.00456254	0.220968	0.83	0.694	0.0160591
Eif4ebp2	0.000131124	0.220859	0.734	0.597	0.00105871
Magt1	0.000507433	0.220823	0.883	0.883	0.00303934
Trim56	0.16526	0.220511	0.255	0.073	0.218474
Atp6v0a4	0.000731654	0.220417	0.872	0.811	0.00401181
Mrps12	1.79e-05	0.220341	0.819	0.752	0.000211145
Secisbp2	0.000107521	0.220325	0.702	0.485	0.000897738
Gns	0.00218275	0.220197	0.777	0.65	0.00923036
Uqcr11	1.37e-09	0.220191	1	1	6.85e-08
Vdr	0.000600849	0.220146	0.638	0.442	0.00346934
Serpinf2	0.000972057	0.219931	0.936	0.888	0.00506538
Uba1	0.000163159	0.219753	0.777	0.743	0.00125881
Bcam	0.00399466	0.21912	0.809	0.704	0.0146388
Ptpa	0.000279621	0.219031	0.585	0.413	0.00190674
Dhfr	0.00048606	0.218969	0.819	0.748	0.00294543
Canx	1.18e-05	0.218948	0.957	0.937	0.000148718
Arid1a	0.000944375	0.218833	0.574	0.403	0.00494745
Rcn1	0.00186575	0.218636	0.511	0.316	0.00825821
Emp1	0.00607184	0.218535	0.404	0.252	0.0196743
Msl1	0.000181284	0.218326	0.596	0.393	0.00136265
Smim7	9.82e-05	0.217918	0.787	0.743	0.000836833
Vps41	0.00029957	0.217546	0.702	0.485	0.00199194
Cep290	0.00180121	0.217475	0.5	0.359	0.00805748
Mafg	0.00131944	0.21693	0.691	0.66	0.00634969
Ccng1	0.000832724	0.216758	0.628	0.495	0.00445788
Bcl7a	0.00114397	0.216597	0.638	0.544	0.00569852
G6pc	0.0372618	0.216597	0.319	0.121	0.0712308
Tcn2	0.000971241	0.216229	0.989	0.981	0.00506538
Plin3	0.00030044	0.216127	0.819	0.752	0.00199321
Scp2	9.69e-07	0.215831	1	0.99	1.85e-05
Sult1b1	0.0441167	0.215818	0.436	0.257	0.0808347
Copa	8.12e-05	0.215144	0.787	0.675	0.000725543
Ttyh3	0.00113576	0.214567	0.489	0.286	0.00566723
Acox1	0.0229307	0.214439	0.904	0.859	0.0510556
Zmym3	0.0272815	0.214361	0.33	0.146	0.0574357
Slc16a13	0.00875248	0.214308	0.404	0.243	0.0256466
Jup	0.000235669	0.214255	0.617	0.447	0.00168115
Ext1	0.00154209	0.214037	0.457	0.286	0.00717119
Ttyh2	0.00315036	0.214037	0.426	0.277	0.0123551
Mest	0.0171794	0.214037	0.404	0.267	0.0419006
Pacs2	0.00515589	0.213724	0.394	0.184	0.0175197
Kif21a	0.00511895	0.213679	0.936	0.879	0.0174329
Pmm2	0.000316904	0.213572	0.585	0.398	0.00207435
Prrc2b	0.000703214	0.213324	0.489	0.383	0.00392172
Abat	0.00418	0.213324	0.787	0.665	0.0150552
1110019D14Rik	0.103874	0.212668	0.298	0.092	0.151207
Pgrmc2	0.000237411	0.21256	0.606	0.495	0.00168539
Brd4	0.000195431	0.212387	0.66	0.578	0.00145043
Gpaa1	0.000208898	0.212316	0.691	0.481	0.00152345
Slc22a12	0.019099	0.21188	0.628	0.587	0.0448535
Dhcr7	0.00121714	0.210242	0.553	0.383	0.00596194
Ankrd17	0.000231902	0.210092	0.723	0.65	0.00166641
Bin1	0.000794447	0.209882	0.574	0.364	0.00428418
Rnf187	5.68e-06	0.20935	0.947	0.835	8.07e-05
Mrpl48	0.000129987	0.208982	0.702	0.621	0.0010546
Nrep	0.0005257	0.208946	0.66	0.51	0.00312127
Rnf208	0.0033603	0.208862	0.457	0.32	0.0128935
Scaf8	0.00825028	0.208798	0.362	0.233	0.0246419
Myl9	0.297195	0.208771	0.17	0.131	0.340662
Ccdc80	0.492915	0.208705	0.128	0.044	0.517321
Idi1	0.00995512	0.208515	0.628	0.592	0.0282029
Phip	0.0148273	0.207909	0.447	0.374	0.0379265
Slc22a8	0.105141	0.207663	0.872	0.699	0.152673
Kif12	8.73e-05	0.207606	0.84	0.84	0.000763962
Gtf2h1	0.000831715	0.207548	0.574	0.442	0.00445788
Sc5d	0.0182824	0.207506	0.362	0.199	0.043649
Snx15	0.00179793	0.207463	0.489	0.335	0.00805507
Egfl7	0.000674619	0.20717	0.553	0.383	0.00379704
Serf2	8.6e-14	0.206917	1	0.985	1.15e-11
Snap47	0.000428135	0.206504	0.67	0.471	0.00267721
Ubap2l	0.000430366	0.206426	0.777	0.655	0.0026808
Rph3al	0.00949055	0.205548	0.415	0.252	0.0272923
Tulp4	0.00281074	0.205269	0.436	0.296	0.0112698
Smad5	0.00396957	0.205269	0.447	0.267	0.0145773
Uhrf1bp1l	0.0010698	0.205228	0.511	0.379	0.00543968
Pycard	0.00282758	0.205114	0.617	0.466	0.0113219
Sardh	0.000179088	0.204848	0.872	0.859	0.00135306
Nsd2	0.00970901	0.204763	0.394	0.238	0.0276768
Mospd3	0.019143	0.204763	0.362	0.175	0.0448982
Epn1	0.000215696	0.203952	0.745	0.699	0.00155757
Dpp7	0.00592592	0.203844	0.489	0.354	0.0193514
slc27a2	0.00220307	0.203552	0.553	0.447	0.00930291
Coro7	0.0541669	0.203304	0.309	0.17	0.0929886
Nit2	0.000114285	0.203288	0.894	0.859	0.000946154
Scg5	0.216452	0.203138	0.277	0.063	0.269214
Epb41l2	0.543018	0.203138	0.138	0.053	0.561886
Gnpda1	0.000489429	0.203011	0.734	0.617	0.00295974
Gucy1a1	0.3997	0.20289	0.149	0.078	0.434598
Zfp618	0.00322345	0.202819	0.5	0.388	0.012548
Tgfbr2	0.0137671	0.202297	0.383	0.311	0.0357245
Fam13a	0.00156651	0.202132	0.511	0.316	0.00725035
Josd1	0.00168299	0.202132	0.532	0.34	0.007645
Commd9	0.000730205	0.201435	0.766	0.597	0.00401135
Cnot1	0.00244131	0.201205	0.564	0.442	0.0101057
Lsm1	0.000537909	0.201054	0.553	0.417	0.00318091
Rab7	0.000108262	0.200996	0.883	0.874	0.000901362
Maged2	0.00450903	0.200961	0.766	0.655	0.0159088
Wwox	0.00109609	0.200807	0.681	0.49	0.00552947
Sdcbp	0.00200714	0.200771	0.777	0.689	0.00866223
Rbm42	0.000211358	0.200718	0.734	0.519	0.00153378
Gpatch11	0.00135992	0.200328	0.532	0.437	0.00650945
Pwwp2a	0.00175711	0.200273	0.479	0.306	0.00791766
Flnb	0.00408566	0.200167	0.457	0.286	0.0148611
Elovl2	0.00188879	0.200068	0.468	0.34	0.00830865
Ankhd1	0.000505237	0.19999	0.67	0.456	0.00303659
Mapk14	0.00119524	0.19999	0.585	0.49	0.0058841
Nrbp1	0.0011098	0.199886	0.479	0.393	0.00557554
Hykk	0.00315059	0.199723	0.894	0.82	0.0123551
Ykt6	0.00429297	0.199648	0.426	0.286	0.0153679
AI314180	0.000932019	0.199576	0.574	0.461	0.00489144
Stard10	1.53e-06	0.199531	0.968	0.937	2.76e-05
Kdm2a	0.0016176	0.199253	0.5	0.383	0.00742833
Fam149a	0.00460032	0.19892	0.426	0.291	0.0161533
Sfswap	0.00478409	0.19892	0.415	0.262	0.0165417
Cul7	0.00181643	0.198735	0.532	0.335	0.00810088
Ap1b1	0.000850743	0.198721	0.638	0.539	0.00452959
Pcyox1	0.00113143	0.198628	0.564	0.383	0.00565521
Lipa	0.0635554	0.19848	0.702	0.675	0.104293
Mpp1	0.00164942	0.198436	0.723	0.592	0.00752739
Esrra	0.000377878	0.198332	0.66	0.529	0.00240386
Zmpste24	0.00115223	0.198332	0.67	0.515	0.00572996
Mrpl41	0.00102273	0.198202	0.723	0.704	0.00525488
Erh	0.000792766	0.197847	0.713	0.65	0.00428418
Gtf2i	0.00010302	0.197703	0.904	0.772	0.000867553
Dvl3	0.00863136	0.197516	0.394	0.248	0.0253676
Bcas3	0.0102916	0.197516	0.404	0.257	0.0288066
Gchfr	0.0131653	0.197472	0.426	0.286	0.0349519
Gcsh	2.86e-05	0.197457	0.936	0.932	0.000311992
Acaa1b	0.000711817	0.197212	0.904	0.859	0.00394696
Gna12	0.00164918	0.196795	0.564	0.311	0.00752739
Chpf2	0.0187485	0.196795	0.351	0.184	0.0443745
Klhdc8b	0.0278233	0.196795	0.351	0.199	0.0581598
Fbxo40	0.217447	0.196795	0.234	0.078	0.270337
Trim28	0.00034642	0.196369	0.723	0.563	0.00223764
Acaa2	0.00605755	0.196343	0.681	0.461	0.0196627
Trak2	0.0067464	0.196255	0.617	0.51	0.0212515
Sltm	0.000430533	0.196181	0.787	0.718	0.0026808
Cox10	0.00164683	0.196164	0.5	0.408	0.00752739
Dgkz	0.00221052	0.196126	0.479	0.33	0.0093076
Btd	0.000238943	0.196034	0.766	0.67	0.00169218
Polrmt	0.00857391	0.196034	0.415	0.214	0.0252492
Gsta3	0.158451	0.195947	0.223	0.117	0.211196
Spns3	0.288661	0.195947	0.17	0.078	0.332305
Anapc5	0.000125231	0.195457	0.904	0.835	0.00103097
Rin2	0.0109366	0.19538	0.362	0.267	0.0301526
Arxes2	0.0132648	0.195113	0.713	0.602	0.0350903
Atp6v0e2	0.00215324	0.194924	0.532	0.354	0.00914504
Cnppd1	0.00153145	0.19487	0.521	0.325	0.00714432
Phf5a	0.00029941	0.194582	0.798	0.665	0.00199194
Prkcz	0.000548658	0.19453	0.734	0.617	0.00323178
Xbp1	0.000342242	0.194489	0.851	0.723	0.00221553
Map7	0.00954512	0.194382	0.883	0.85	0.0273956
Rap2a	0.0392678	0.194382	0.298	0.184	0.0741221
Itpr2	0.0451062	0.194382	0.33	0.155	0.0821357
Gpat4	0.00108566	0.194088	0.596	0.505	0.00549184
Pcolce	0.029128	0.193913	0.372	0.233	0.0603291
Aldh9a1	0.000257275	0.193483	0.798	0.66	0.00177496
Arl8b	0.000647857	0.193483	0.628	0.5	0.00367578
Ubn2	0.00131001	0.193217	0.532	0.374	0.00632706
Elof1	0.000292877	0.192846	0.819	0.733	0.00196074
Rab34	0.000773439	0.192333	0.83	0.704	0.00420173
Nr3c1	0.000714454	0.19227	0.649	0.583	0.00394696
Abcb10	0.00702021	0.192239	0.404	0.238	0.021926
Nucb1	0.000750488	0.19221	0.745	0.631	0.00409979
4931406C07Rik	0.258078	0.192176	1	0.99	0.306585
Grb10	0.00211526	0.192123	0.745	0.607	0.00904307
Sumo3	0.000159106	0.192039	0.766	0.704	0.00123381
Man2c1	0.00321112	0.192005	0.457	0.33	0.0125165
Zkscan1	0.00181493	0.191937	0.691	0.621	0.00810088
Ptp4a2	0.000392063	0.19193	0.83	0.68	0.00248335
Tmem25	0.00159721	0.191813	0.457	0.398	0.00734618
Aak1	0.00341206	0.191782	0.638	0.466	0.0129897
Glyctk	0.0042845	0.191736	0.67	0.602	0.0153563
2022-03-08	0.00179285	0.191375	0.553	0.427	0.00804457
Mrpl28	2.36e-05	0.191356	0.904	0.864	0.000264584
E030030I06Rik	0.285085	0.1913	0.234	0.063	0.329608
Gpr137	0.0335087	0.191134	0.362	0.16	0.0665869
Snrpg	0.000515423	0.190764	0.787	0.694	0.00307267
Mphosph8	0.000450365	0.190744	0.745	0.553	0.00277419
Srsf3	0.000113298	0.190611	0.872	0.85	0.000940629
Pgd	0.00163184	0.190479	0.67	0.519	0.00748203
Tufm	0.000290745	0.190352	0.83	0.767	0.00195756
Slc12a7	0.00518237	0.19028	0.489	0.354	0.0175674
Tnks2	0.000677287	0.190134	0.787	0.612	0.00379875
Pelp1	0.0025461	0.190083	0.457	0.34	0.0104301
Mylk3	0.190581	0.189874	0.234	0.112	0.24415
Clic5	0.00439558	0.189673	0.489	0.369	0.01564
Taok2	0.0256931	0.189626	0.372	0.175	0.0555315
Ppp2r5b	0.0337431	0.189626	0.309	0.18	0.0668268
Impa1	0.000650696	0.189495	0.745	0.65	0.00368477
Spc25	0.00202917	0.189248	0.628	0.51	0.00871889
Rnf169	0.0018751	0.189232	0.521	0.32	0.00828712
Lamc1	0.002174	0.189198	0.585	0.413	0.00920659
Mien1	9.21e-05	0.189051	0.947	0.956	0.000801209
Gcc2	0.00117478	0.18902	0.691	0.583	0.00580282
Dpm3	8.64e-05	0.18889	0.872	0.772	0.000759831
Mbd6	0.0231965	0.18889	0.34	0.194	0.0515302
Aldh4a1	0.00579524	0.188644	0.862	0.859	0.0190085
Itga6	0.0076372	0.188532	0.787	0.621	0.023284
Renbp	0.0156666	0.188532	0.755	0.665	0.0394551
Rnf128	0.0115652	0.188426	0.66	0.553	0.0315894
Dmxl2	0.00803758	0.188338	0.436	0.286	0.0242281
Syne4	0.000205029	0.188314	0.809	0.641	0.00150645
Camk2g	0.0438674	0.188164	0.351	0.194	0.0806597
Gprasp1	0.032023	0.188061	0.319	0.252	0.064598
Srr	0.00651753	0.187972	0.457	0.335	0.0207305
Lgmn	0.00140844	0.187874	0.957	0.961	0.00664914
Gga2	0.00467504	0.187826	0.521	0.417	0.0162795
Gsto1	0.000448169	0.187681	0.734	0.612	0.00276716
Depdc7	0.00254986	0.187632	0.521	0.296	0.0104301
App	0.00135894	0.187414	0.936	0.942	0.00650945
Metrn	0.0140542	0.187082	0.362	0.257	0.0362646
Tmem135	0.00195691	0.186744	0.606	0.466	0.00850302
Nek9	0.013363	0.186744	0.404	0.204	0.0351602
Spr	3.19e-05	0.1864	0.894	0.869	0.000340099
Steap1	0.0696637	0.186382	0.287	0.17	0.112187
Xpnpep2	0.000758171	0.186333	0.734	0.524	0.00413407
Pbxip1	0.00159558	0.186114	0.713	0.558	0.00734618
Map3k11	0.0339597	0.18605	0.362	0.204	0.0672104
Tnrc6b	0.00396305	0.185925	0.489	0.403	0.0145773
Gnb1	0.000282078	0.185844	0.777	0.714	0.00191461
Rdh16f2	0.052725	0.185666	0.309	0.184	0.091475
Aggf1	0.00663654	0.185621	0.489	0.379	0.0209729
Arhgap11a	0.220949	0.185573	0.213	0.126	0.273416
Hpn	0.000372413	0.185025	0.936	0.908	0.00237423
Auts2	0.00345309	0.18496	0.532	0.388	0.0130062
Dhrs3	0.0185653	0.184525	0.777	0.65	0.0440739
Angpt1	0.0711819	0.184525	0.287	0.146	0.113814
Mief1	0.00862908	0.184444	0.394	0.282	0.0253676
Mvb12b	0.00938242	0.184444	0.383	0.286	0.0270608
Dgcr8	0.276559	0.184328	0.234	0.087	0.322414
Ndufa1	3.5e-05	0.184189	0.989	0.898	0.000362391
Lrpprc	0.0123194	0.184027	0.83	0.67	0.0329469
Maz	0.000578668	0.183947	0.66	0.544	0.00335445
Tmem259	0.00103636	0.183808	0.734	0.621	0.00530741
Hes6	0.00231013	0.183808	0.638	0.553	0.00963045
Ppp1r10	0.0043907	0.183808	0.447	0.354	0.01564
Nat8f2	0.115184	0.18358	0.287	0.155	0.16338
Stt3a	0.000613525	0.183549	0.734	0.617	0.00352178
Palm	0.000208637	0.183497	0.851	0.811	0.00152345
Arfgef2	0.0329292	0.183101	0.351	0.189	0.065836
Nid1	0.508997	0.183001	0.138	0.049	0.531041
Atp5k	4.84e-07	0.182976	1	0.995	1.05e-05
Frmd4b	0.00516282	0.182263	0.511	0.335	0.0175214
Vcan	0.468774	0.182031	0.117	0.092	0.495942
Tram1	0.00216678	0.181882	0.787	0.757	0.00918929
Nudt16l1	0.00120939	0.181793	0.777	0.689	0.00594288
Shank2	0.0306177	0.181721	0.33	0.209	0.0625768
Serpinf1	0.132548	0.181721	0.277	0.136	0.182806
Psme4	0.00299039	0.181585	0.585	0.471	0.0118447
Rab17	0.00458957	0.181585	0.489	0.408	0.0161349
Irf2bp2	0.00561013	0.181585	0.543	0.451	0.0185887
Chst15	0.0241713	0.181585	0.362	0.223	0.0531732
Ppih	0.027855	0.181585	0.34	0.218	0.0581846
Pkdcc	0.00969085	0.181238	0.394	0.325	0.0276768
Gucd1	0.000498821	0.180841	0.798	0.67	0.00300417
Shmt2	0.00835265	0.180794	0.798	0.762	0.0248466
Spsb3	0.00812289	0.18075	0.426	0.306	0.0243829
Habp4	0.00401956	0.180587	0.5	0.345	0.0146934
Fto	0.00340131	0.180514	0.479	0.393	0.0129656
Dctn5	0.00602766	0.180162	0.468	0.306	0.0196183
Kcnj15	0.0148966	0.18007	0.755	0.723	0.0380705
Akap12	0.221979	0.179845	0.287	0.107	0.274116
Arcn1	0.00124526	0.179754	0.766	0.67	0.00608955
Impact	0.0170908	0.179727	0.383	0.209	0.0417807
Kat6a	0.00555661	0.179627	0.489	0.286	0.0184947
Sdccag8	0.00403292	0.179434	0.479	0.437	0.0147239
Aph1a	0.00309323	0.179403	0.734	0.665	0.0121863
Itgb6	0.00641933	0.179185	0.809	0.733	0.0205293
E330021D16Rik	0.175775	0.179173	0.266	0.097	0.229601
Fkbp15	0.00919282	0.179032	0.436	0.282	0.0266035
Washc5	0.00553952	0.17901	0.468	0.301	0.0184588
Cmtm7	0.0176345	0.17901	0.394	0.257	0.0426918
Traf7	0.0040928	0.178937	0.479	0.432	0.0148624
Crk	0.00140946	0.178922	0.585	0.451	0.00664914
Ttc1	0.00185064	0.178881	0.723	0.534	0.00821607
Ralbp1	0.000795983	0.178769	0.745	0.65	0.00428461
Plekhg5	0.0257166	0.178446	0.33	0.233	0.0555315
Pygl	0.048409	0.178446	0.309	0.209	0.0858518
Deaf1	0.00761973	0.177888	0.479	0.316	0.0232769
Kdm5c	0.0136937	0.177888	0.436	0.325	0.0357245
Slc13a3	0.0372367	0.177844	0.351	0.233	0.0712308
Golim4	0.00558922	0.177563	0.532	0.427	0.0185541
Fastk	0.0014972	0.177377	0.734	0.636	0.00702735
Ptpn4	0.0140331	0.177148	0.362	0.214	0.0362541
Vps36	0.000567438	0.177119	0.755	0.646	0.00332211
Aars	0.00307363	0.17709	0.617	0.485	0.0121417
Blmh	0.00312933	0.17709	0.787	0.762	0.0123121
Hist1h2ae	0.419613	0.17709	0.085	0.126	0.452068
Rnf168	0.111867	0.177026	0.309	0.136	0.160144
Slbp	0.00856546	0.177004	0.521	0.408	0.0252492
Wdfy1	0.00520683	0.176956	0.691	0.665	0.01763
Elk1	0.244656	0.176956	0.255	0.083	0.29457
Herc1	0.0081268	0.176906	0.564	0.34	0.0243829
Mto1	0.00889402	0.176852	0.457	0.388	0.0259064
Mlycd	0.00262624	0.176534	0.574	0.461	0.0106424
Arhgap21	0.0357349	0.176427	0.34	0.18	0.0692776
Fbxo22	0.000711301	0.176334	0.691	0.621	0.00394696
Gm17586	0.0988914	0.176334	0.287	0.146	0.145394
Ccdc141	0.0963954	0.176209	0.511	0.345	0.142652
Gas6	0.0024535	0.175992	0.713	0.626	0.0101418
Dhx9	0.0028419	0.175924	0.628	0.539	0.0113637
Ggnbp2	0.00191582	0.175833	0.745	0.646	0.00836641
Iqgap2	0.114597	0.175775	0.298	0.146	0.162785
Cyb5r3	0.00115924	0.175638	0.766	0.631	0.00574987
Igf1r	0.00510182	0.175517	0.777	0.752	0.0173947
1600014C10Rik	0.256263	0.175517	0.223	0.092	0.304552
Ppfia1	0.00209377	0.175154	0.585	0.481	0.00897025
Clstn1	0.0506739	0.175133	0.34	0.18	0.088702
Trim33	0.0049394	0.175084	0.5	0.345	0.0169419
Hadh	2.18e-05	0.17497	0.989	0.947	0.000247869
Btbd2	0.0015815	0.174921	0.617	0.51	0.00730822
Snrpa	0.00140753	0.174816	0.723	0.573	0.00664914
Ipo8	0.00840561	0.174816	0.457	0.277	0.0249194
Ppp4r1	0.0159659	0.174501	0.372	0.214	0.0400374
Adal	0.0253965	0.174501	0.351	0.194	0.0550851
Glis2	0.00239026	0.174413	0.745	0.641	0.0099363
Naa16	0.0855833	0.174322	0.298	0.141	0.129922
2610507B11Rik	0.00111374	0.174163	0.702	0.568	0.00558255
Ccnd3	0.000243761	0.173794	0.894	0.854	0.00171391
Sdhaf1	0.00132006	0.173447	0.67	0.636	0.00634969
Son	0.000178169	0.173228	0.894	0.888	0.00134959
Acad11	0.0102338	0.173112	0.426	0.301	0.0286997
Mroh1	0.0046407	0.172984	0.457	0.393	0.0162369
Slc29a3	0.00732361	0.172951	0.574	0.461	0.0226331
Swi5	6.14e-08	0.172903	0.979	0.966	1.8e-06
Pcf11	0.0225768	0.172895	0.372	0.243	0.0505741
Fchsd2	0.0248145	0.172895	0.383	0.233	0.0541826
Gm15318	0.019896	0.17256	0.383	0.291	0.046079
Crebbp	0.00277673	0.172524	0.574	0.432	0.0111486
Nudt6	0.0756471	0.172403	0.298	0.184	0.118701
Bap1	0.0160941	0.172322	0.383	0.267	0.0402902
Arhgef1	0.0177298	0.172322	0.404	0.248	0.0427814
Flna	0.105076	0.172322	0.255	0.209	0.152673
Zbtb7a	0.00427114	0.172196	0.489	0.359	0.0153271
Oaz2	0.00708866	0.172146	0.553	0.456	0.0220461
Ywhaz	0.000507762	0.171807	0.883	0.82	0.00303934
Marf1	0.0360669	0.171783	0.34	0.18	0.0696455
Ptpn23	0.0133333	0.171757	0.436	0.277	0.0351602
Zfand5	0.00959063	0.171745	0.766	0.718	0.0274994
Iars2	0.00468563	0.171477	0.585	0.524	0.0162971
Tspan7	0.0366283	0.171477	0.351	0.233	0.0704519
Adap1	0.0399481	0.171173	0.309	0.204	0.0751649
4932438A13Rik	0.00737816	0.170987	0.543	0.364	0.0227565
Bbs7	0.0165759	0.170898	0.415	0.228	0.0409176
Rbbp6	0.00198191	0.170612	0.734	0.602	0.00859122
Smg5	0.0341111	0.170572	0.34	0.189	0.0673739
Ndrg2	0.324199	0.170477	0.213	0.102	0.364507
Sec24c	0.00221764	0.170456	0.681	0.539	0.009323
Ice1	0.0081575	0.170423	0.426	0.311	0.0244143
Tmem42	0.0122486	0.170328	0.426	0.272	0.0328156
Fahd1	0.000472424	0.170302	0.915	0.922	0.0028866
Abca3	0.00475654	0.17014	0.894	0.806	0.0164852
Tab2	0.00211692	0.170126	0.585	0.393	0.00904307
Tnrc6c	0.00228027	0.170055	0.628	0.49	0.00954662
Slc39a9	0.0470608	0.169979	0.33	0.223	0.0844572
Slc17a4	0.153922	0.169825	0.255	0.117	0.206094
Rnf152	0.00837889	0.169721	0.447	0.335	0.0248994
Ehmt2	0.00250353	0.169658	0.617	0.5	0.0103052
Nadk	0.00255268	0.169396	0.723	0.587	0.0104301
H2-DMb2	0.0503781	0.169396	0.34	0.17	0.088342
Psph	0.00331862	0.169295	0.745	0.607	0.0128287
Cog7	0.00486073	0.169234	0.564	0.354	0.0167583
Adi1	0.00601404	0.169234	0.479	0.364	0.0195956
Tspan3	0.000630214	0.169194	0.851	0.801	0.0035965
Hif1a	0.0035655	0.169117	0.617	0.456	0.0133491
S100a11	0.00400234	0.169102	0.862	0.675	0.0146487
Scaf1	0.0146672	0.169045	0.404	0.272	0.0375823
Phospho2	0.0621147	0.168992	0.319	0.16	0.102329
Bmpr2	0.026042	0.168821	0.372	0.233	0.0557854
Ube2u	0.0751604	0.168395	0.319	0.165	0.118126
Grina	0.00129931	0.168298	0.936	0.922	0.00631113
Zkscan3	0.00576414	0.168293	0.543	0.471	0.0189494
Prpsap1	0.00159659	0.168198	0.628	0.476	0.00734618
Upf3b	0.0070365	0.168168	0.489	0.393	0.0219517
Rflnb	0.345054	0.168067	0.202	0.073	0.383408
Tagln	0.402383	0.168067	0.181	0.078	0.43703
Cenpc1	0.113256	0.16793	0.287	0.141	0.161582
Slc9a3r1	7.16e-06	0.167891	0.947	0.942	9.65e-05
Aldh1l1	0.0243659	0.167807	0.649	0.592	0.0534811
Blvra	0.0257346	0.167807	0.723	0.733	0.0555315
Arf3	0.00649698	0.167732	0.617	0.5	0.0206876
Prkaa2	0.00996073	0.167732	0.617	0.539	0.0282029
Celsr2	0.0351459	0.167596	0.383	0.233	0.0688167
Nsd1	0.00414531	0.167368	0.702	0.602	0.0149912
Arhgap1	0.0069546	0.167343	0.5	0.359	0.0217906
Rapgef1	0.098794	0.167319	0.298	0.15	0.145323
Lztr1	0.002643	0.167319	0.777	0.665	0.0106847
Tmem120a	0.00326058	0.167194	0.67	0.539	0.0126573
A430005L14Rik	0.00268763	0.167146	0.564	0.466	0.0108502
Tmem214	0.00256227	0.166988	0.628	0.519	0.0104301
Pcyt1a	0.00559338	0.166885	0.553	0.388	0.0185541
Hexa	0.00794843	0.166832	0.457	0.364	0.0240087
Slc9a3	0.132952	0.166717	0.245	0.155	0.183277
Snn	0.0693394	0.166604	0.319	0.233	0.11191
Rab4a	0.0047476	0.166587	0.596	0.568	0.0164737
Med1	0.00842567	0.166432	0.489	0.369	0.0249376
1700037H04Rik	0.0559082	0.166308	0.574	0.471	0.0947056
Stard4	0.0029653	0.166299	0.798	0.694	0.0117743
Srp19	0.00101423	0.16625	0.745	0.728	0.00524794
Topbp1	0.224669	0.166158	0.245	0.097	0.276741
Kmt2d	0.266582	0.166158	0.234	0.112	0.313896
Bgn	0.432704	0.166158	0.149	0.083	0.463792
Edc4	0.0587603	0.166125	0.34	0.16	0.0982337
Ubb	2.36e-10	0.166086	1	1	1.36e-08
Dgkd	0.00493132	0.166023	0.564	0.34	0.0169419
Tmem127	0.00928334	0.166023	0.5	0.306	0.0268277
Cuta	0.00221049	0.166013	0.809	0.699	0.0093076
Hdac6	0.0039096	0.165887	0.628	0.544	0.0144351
Man2b1	0.00318822	0.165867	0.691	0.587	0.0124603
Atp6ap2	0.00171065	0.165818	0.766	0.665	0.00774669
Bmp1	0.416044	0.165542	0.181	0.073	0.449178
Nedd4	4.09e-05	0.165454	0.968	0.971	0.000408465
Tsc22d1	0.00343932	0.165343	0.798	0.718	0.0130062
Mycbp2	0.00455284	0.165189	0.691	0.495	0.0160441
Manbal	0.0133359	0.165046	0.415	0.311	0.0351602
Pqlc2	0.0199868	0.165023	0.372	0.291	0.0462165
Dcp2	0.0505825	0.164968	0.34	0.16	0.0885948
Rab3il1	0.169807	0.164937	0.266	0.112	0.222697
Man1a	0.270028	0.164901	0.255	0.078	0.317317
Bex4	0.0398693	0.164599	0.404	0.262	0.0750646
Srp68	0.00443811	0.164526	0.649	0.583	0.0157531
Kcnk5	0.0294572	0.164459	0.33	0.238	0.0606691
Megf8	0.120316	0.164341	0.266	0.141	0.168948
Xab2	0.0108729	0.164005	0.468	0.243	0.0300332
Mllt6	0.045045	0.163847	0.362	0.189	0.0820753
Eif5b	0.000102764	0.16377	0.947	0.932	0.000867553
Larp1	0.00338919	0.163475	0.638	0.539	0.012953
Pi4k2a	0.00754711	0.163228	0.489	0.354	0.0231776
Ppt1	0.00334349	0.163064	0.681	0.549	0.0128813
Ptprd	0.0613453	0.163064	0.606	0.539	0.101517
Add1	0.00390169	0.162971	0.67	0.568	0.014424
C1ra	0.560394	0.162893	0.138	0.039	0.577691
Fat1	0.00597477	0.162811	0.638	0.563	0.0194893
Pfn1	4.8e-06	0.162639	0.968	0.951	7.12e-05
Npc2	0.0033634	0.162603	0.957	0.922	0.0128935
Ttc4	0.00392682	0.162588	0.553	0.432	0.0144805
Lama1	0.00604911	0.16253	0.596	0.476	0.0196627
Sigirr	0.0029686	0.162423	0.809	0.801	0.0117743
Iqcg	0.00673665	0.162342	0.532	0.354	0.0212436
Trnt1	0.00627512	0.162309	0.574	0.461	0.0201338
Lpp	0.00345575	0.162274	0.798	0.66	0.0130062
2310011J03Rik	0.00378402	0.162185	0.553	0.456	0.0140066
Txnrd1	0.00683007	0.162171	0.596	0.519	0.0214691
Wsb2	0.00342081	0.162142	0.84	0.704	0.0130062
Arl2bp	0.00723892	0.162052	0.457	0.408	0.0224422
Mgat3	0.00782148	0.162052	0.521	0.393	0.0237093
Cyb5b	0.0044983	0.161976	0.84	0.743	0.0159088
Mthfd1	0.00195867	0.161907	0.862	0.796	0.00850302
Klhl14	0.283653	0.161857	0.255	0.097	0.32834
Npl	0.239327	0.161544	0.447	0.291	0.289458
Slc30a4	0.0578554	0.161502	0.319	0.184	0.0969424
Slc35d1	0.0259713	0.161393	0.436	0.277	0.0556871
Tor1aip2	0.00465276	0.16132	0.564	0.481	0.0162598
Cry1	0.205588	0.161278	0.277	0.117	0.259212
Sesn3	0.229906	0.161278	0.255	0.121	0.281539
Rrm1	0.370775	0.161278	0.181	0.092	0.406456
Chtf8	0.00577818	0.16123	0.5	0.427	0.0189744
Ago2	0.00414694	0.161114	0.638	0.515	0.0149912
Nav2	0.0426287	0.161054	0.436	0.335	0.0790945
Rab10	0.00130346	0.160815	0.787	0.67	0.00631113
Slc25a34	0.562491	0.160746	0.191	0.015	0.57965
4732463B04Rik	0.0493736	0.160679	0.319	0.233	0.0869957
1810041L15Rik	0.0505075	0.160679	0.34	0.223	0.0885161
Erf	0.016559	0.160655	0.447	0.311	0.0409176
Cbx1	0.00087579	0.160521	0.83	0.762	0.00463774
Ppp1r37	0.00972891	0.160427	0.521	0.374	0.0276946
Prdm2	0.0144852	0.160427	0.415	0.311	0.037246
Men1	0.0164219	0.160427	0.436	0.252	0.0406947
Rev1	0.391454	0.160427	0.213	0.078	0.426895
Slc25a1	0.00559213	0.160229	0.787	0.801	0.0185541
Ints3	0.034627	0.160177	0.362	0.252	0.0680392
Rcc1	0.0915188	0.160148	0.309	0.141	0.137022
Hnrnpa3	0.000566887	0.160141	0.957	0.869	0.00332211
Cux1	0.000609574	0.159867	0.872	0.874	0.00350824
Zc3h7a	0.0182408	0.159683	0.383	0.252	0.043649
Sgpl1	0.0432509	0.159683	0.34	0.252	0.0799461
Ifitm3	0.114058	0.159683	0.287	0.209	0.162176
Dnm2	0.00564328	0.159642	0.553	0.413	0.0186663
Ptpn1	0.0137829	0.159572	0.479	0.32	0.0357245
Mpzl2	0.00608505	0.159257	0.553	0.398	0.0196743
Anapc7	0.0072649	0.159257	0.543	0.461	0.022499
Gna14	0.267335	0.159257	0.245	0.097	0.314531
Fgfr4	0.00515636	0.159119	0.574	0.447	0.0175197
Cpt2	0.00357798	0.159072	0.755	0.631	0.0133787
Rbm25	0.00194189	0.159068	0.883	0.811	0.00845513
Zfp318	0.0137408	0.159027	0.415	0.301	0.0357245
Paxbp1	0.0235943	0.159027	0.415	0.277	0.0521773
Ptbp3	0.0080667	0.158875	0.691	0.65	0.024291
Supt5	0.00697562	0.158667	0.67	0.583	0.0218298
Chka	0.0176029	0.158643	0.532	0.417	0.0426575
Zfp638	0.00343538	0.15854	0.649	0.539	0.0130062
Slc35b4	0.00431664	0.158445	0.628	0.519	0.0154151
Rpp25l	0.00549391	0.158445	0.574	0.539	0.0183484
Syvn1	0.0330905	0.158374	0.34	0.243	0.0660685
Arl6ip4	0.00295216	0.158274	0.681	0.592	0.0117407
Pank1	0.00409613	0.158274	0.723	0.612	0.0148624
Inpp1	0.407616	0.158274	0.223	0.053	0.441246
Ppp1r15b	0.0195799	0.158222	0.489	0.403	0.0454903
Apeh	0.00463308	0.158197	0.713	0.636	0.0162296
Mib1	0.0206659	0.158126	0.415	0.286	0.0473768
Ehhadh	0.0540495	0.157995	0.351	0.17	0.0928956
Ddb1	0.00173486	0.157941	0.851	0.777	0.00784424
C130074G19Rik	0.00376573	0.15779	0.745	0.636	0.0139565
Serpinh1	9.58e-05	0.157776	0.968	0.937	0.000823294
Ylpm1	0.0238689	0.157684	0.447	0.252	0.0525867
Cfh	0.496505	0.157574	0.117	0.102	0.52026
Casp8ap2	0.0734189	0.157478	0.287	0.184	0.116197
Ccdc88a	0.195192	0.157478	0.234	0.15	0.248557
Sdhc	0.0006464	0.15743	0.957	0.922	0.0036746
2310061I04Rik	0.00540413	0.157334	0.606	0.5	0.0180897
Anapc2	0.00952782	0.157186	0.489	0.34	0.0273727
Mcfd2	0.00970242	0.157186	0.787	0.854	0.0276768
Dock9	0.0536869	0.157186	0.468	0.325	0.0924345
Tmx2	0.00343533	0.157103	0.84	0.767	0.0130062
Agtr1a	0.00654705	0.157078	0.543	0.417	0.0207795
Scrib	0.0575644	0.156968	0.277	0.199	0.0967859
Ik	0.00137392	0.156886	0.766	0.694	0.00653859
Proser1	0.0226944	0.156862	0.362	0.267	0.0507215
G3bp2	0.00624461	0.156764	0.66	0.612	0.0200798
Ndufb7	3.87e-06	0.156661	0.979	0.995	5.93e-05
Emilin1	0.412489	0.156498	0.202	0.083	0.446029
Cstf1	0.0480097	0.156467	0.33	0.204	0.0855155
Secisbp2l	0.0170235	0.156354	0.5	0.393	0.0416587
Mrpl20	0.000135242	0.156283	0.936	0.942	0.001086
Lrp10	0.00963232	0.156252	0.649	0.578	0.0275765
Emc3	0.00238641	0.156234	0.755	0.655	0.00993437
Efemp2	0.0371837	0.155973	0.351	0.267	0.0712308
Nphp3	0.123593	0.155973	0.287	0.146	0.172233
Mki67	0.399967	0.155973	0.191	0.097	0.434728
Agtrap	0.0173225	0.155654	0.67	0.544	0.0422146
Fxyd2	6.71e-07	0.155532	1	1	1.39e-05
Kmt5b	0.0180275	0.155513	0.436	0.257	0.0432866
Slc48a1	0.00586741	0.1555	0.755	0.699	0.0191817
Hspa8	6.41e-08	0.155439	1	1	1.85e-06
Hoxb5os	0.0200522	0.155403	0.585	0.485	0.0463314
2900026A02Rik	0.075052	0.155007	0.319	0.194	0.118019
Nagk	0.0122247	0.154988	0.606	0.456	0.0327815
Gxylt1	0.177488	0.154948	0.266	0.136	0.231325
Spsb4	0.0188313	0.154904	0.436	0.442	0.0444539
Uggt1	0.0271422	0.154804	0.479	0.379	0.0573478
Sgtb	0.494464	0.154804	0.202	0.039	0.518455
Bex1	0.157972	0.154613	0.298	0.209	0.210844
Nfia	0.0683919	0.154535	0.33	0.204	0.110807
Ppard	0.135096	0.154447	0.277	0.16	0.185103
Gm4131	0.554625	0.154235	0.149	0.039	0.57295
Rbp1	0.0758368	0.154151	0.617	0.374	0.118872
Mat2a	0.102699	0.154091	0.809	0.689	0.149867
Togaram1	0.0337128	0.15407	0.362	0.223	0.0668257
Psmd1	0.00315289	0.154002	0.777	0.796	0.0123551
Hoxa7	0.00643803	0.15387	0.564	0.451	0.0205667
Atf6b	0.0128761	0.153852	0.5	0.33	0.0342779
Ints1	0.0140378	0.153852	0.457	0.33	0.0362541
Ndufaf4	0.00494261	0.153824	0.681	0.607	0.0169419
Xpot	0.0223761	0.153444	0.447	0.345	0.050201
Flvcr2	0.0687461	0.15316	0.351	0.233	0.111253
Kidins220	0.0119881	0.153019	0.787	0.694	0.0323868
Lysmd3	0.0261469	0.152715	0.394	0.267	0.0558879
Tmem258	0.000528442	0.152696	0.904	0.893	0.00313123
Naa38	0.00201972	0.152678	0.777	0.704	0.00870375
Gorasp2	0.00477623	0.152678	0.681	0.485	0.016534
Pdia5	0.02172	0.152645	0.436	0.32	0.0489908
Plekha7	0.0280741	0.152645	0.394	0.325	0.0585176
Clrn3	0.00486384	0.152589	0.809	0.728	0.0167583
Gjb2	0.0157617	0.15247	0.372	0.311	0.0396267
Cpsf2	0.00915479	0.152429	0.532	0.335	0.0265344
Cnn2	0.112218	0.152276	0.277	0.214	0.160335
Cpne3	0.0131707	0.152234	0.511	0.374	0.0349519
Erlin2	0.00461407	0.152219	0.67	0.476	0.0161823
Pcbp2	0.000707073	0.152182	0.904	0.85	0.00393577
Gapvd1	0.0107215	0.152059	0.521	0.471	0.0297549
Trip12	0.0150985	0.152059	0.713	0.607	0.0384423
Zfp512b	0.0476649	0.152059	0.351	0.204	0.0851077
Tbpl1	0.0596808	0.152059	0.34	0.204	0.0992092
Igsf9	0.432327	0.152059	0.213	0.068	0.463726
Bspry	0.0300389	0.151843	0.426	0.248	0.0615712
Hif3a	0.0109797	0.15183	0.67	0.641	0.0302431
Stk11	0.0134668	0.151693	0.489	0.388	0.03537
Fam193a	0.0136378	0.151693	0.489	0.379	0.0356913
Enpp1	0.0558181	0.151603	0.33	0.199	0.0947056
Gak	0.0139483	0.151538	0.5	0.417	0.0360864
Cyp2j6	0.022548	0.151538	0.532	0.359	0.0505481
Ppp1r16a	0.0136146	0.151484	0.479	0.35	0.0356626
Tmem150a	0.001283	0.151478	0.957	0.908	0.00625329
Ppp1r21	0.0111912	0.151398	0.574	0.417	0.0306818
Atp6v0a2	0.0177199	0.151253	0.436	0.316	0.0427814
Gm17750	0.0151586	0.151196	0.564	0.413	0.0385391
Cyp2d22	0.0804749	0.151107	0.415	0.306	0.124416
Ctsz	0.00185531	0.150896	0.915	0.883	0.00822438
Slc39a1	0.021526	0.150858	0.426	0.354	0.0485906
Ctdspl	0.00223347	0.150858	0.777	0.636	0.009364
Zfp207	0.00406974	0.150696	0.702	0.612	0.0148215
Atg5	0.0043308	0.150677	0.67	0.597	0.0154469
Dicer1	0.0200847	0.150623	0.489	0.379	0.0463444
Trappc11	0.0312729	0.150582	0.404	0.267	0.0635623
Ap4e1	0.236758	0.150523	0.266	0.112	0.287296
Plekha6	0.2961	0.150523	0.245	0.092	0.339538
Ptrh2	0.00644891	0.150483	0.66	0.529	0.0205791
Tbc1d13	0.0151075	0.150366	0.468	0.379	0.0384423
Hnrnpul2	0.00317624	0.150275	0.777	0.699	0.01243
Herc2	0.0916699	0.150275	0.309	0.233	0.137178
Lhfpl2	0.0185282	0.150173	0.415	0.286	0.0440212
Fnip1	0.0270601	0.150173	0.383	0.277	0.0572567
Tnfaip8	0.01612	0.150014	0.66	0.544	0.0403205
Pfkm	0.0743866	0.14993	0.34	0.18	0.117313
Rnf167	0.0351211	0.14977	0.34	0.282	0.0688167
Pax2	0.106137	0.14977	0.351	0.228	0.153815
Col6a1	0.450414	0.149616	0.181	0.053	0.479799
Slc52a3	0.01183	0.149289	0.521	0.374	0.0321632
Rad21	0.00148421	0.149232	0.777	0.65	0.00698602
Rnf217	0.406931	0.1491	0.202	0.058	0.44083
Apcs	0.26177	0.149063	0.223	0.097	0.309469
Mtmr12	0.0747469	0.149032	0.309	0.209	0.117665
Pex1	0.0315939	0.149004	0.372	0.272	0.06389
Smim14	0.0114409	0.148921	0.543	0.369	0.0313079
Pcbp4	0.011255	0.148906	0.574	0.388	0.0308279
Amn	6.26e-05	0.148878	1	0.985	0.000580299
Myo15b	0.00647183	0.148855	0.66	0.568	0.0206299
Cox7a1	0.0975849	0.148845	0.628	0.539	0.143833
Sall2	0.229473	0.148593	0.234	0.117	0.281361
Galk2	0.0153121	0.148593	0.649	0.602	0.0388286
Alg10b	0.0212253	0.148593	0.426	0.267	0.048208
Klhl22	0.0349884	0.148593	0.383	0.248	0.0686883
Nfyb	0.0415511	0.148593	0.415	0.282	0.0775256
Ifitm2	0.00200202	0.148529	0.957	0.85	0.00866223
Glmp	0.00877163	0.148401	0.755	0.777	0.0256516
Timm22	0.00445349	0.148376	0.734	0.709	0.0157887
Tob1	0.0162211	0.148232	0.489	0.364	0.0404057
Fam117b	0.0253856	0.148211	0.383	0.296	0.0550851
Igf2bp1	0.00900377	0.148094	0.702	0.568	0.0261483
Homer3	0.391683	0.148094	0.181	0.083	0.426987
Afm	0.00779033	0.147734	0.766	0.689	0.0236771
Rab9	0.00839152	0.147715	0.606	0.485	0.0249118
Tug1	0.00888225	0.147629	0.564	0.427	0.0258977
C2cd2l	0.0212685	0.147524	0.447	0.413	0.0482688
Palld	0.112001	0.147524	0.521	0.451	0.16018
Rab5c	0.0397737	0.147456	0.979	0.927	0.074972
Dhx36	0.0161925	0.147407	0.67	0.626	0.0403989
Zmynd8	0.0192539	0.147374	0.564	0.471	0.0449818
Tpra1	0.027489	0.147315	0.372	0.252	0.0577072
Comtd1	0.00489206	0.147263	0.702	0.519	0.0168358
Krt10	0.181617	0.147226	0.277	0.15	0.23535
Slc47a1	0.007853	0.14715	0.915	0.908	0.0237693
2022-09-11	0.0570613	0.147095	0.351	0.316	0.0962705
Pla2g6	0.0518796	0.147004	0.372	0.262	0.0903819
Laptm4a	0.00105034	0.146968	0.883	0.825	0.00535
Sec61b	0.000203512	0.146964	0.968	0.927	0.00150282
Evi5	0.00442545	0.146879	0.83	0.752	0.0157272
Kif1b	0.014567	0.146833	0.457	0.359	0.0373907
Zdhhc9	0.00761591	0.146784	0.596	0.485	0.0232769
Ocel1	0.0810266	0.146784	0.33	0.18	0.124941
Sun1	0.0727655	0.146494	0.362	0.228	0.115412
Senp3	0.0725094	0.14635	0.319	0.194	0.115287
Mtap	0.134781	0.14635	0.287	0.165	0.184844
Usp3	0.0123316	0.146207	0.649	0.495	0.0329469
Wwc1	0.00684588	0.146185	0.702	0.573	0.0214958
Hcfc2	0.310873	0.146185	0.234	0.102	0.352763
Mapre1	0.00250337	0.14617	0.819	0.709	0.0103052
Sepsecs	0.0474462	0.146093	0.351	0.252	0.0849753
Ephx2	0.0102558	0.145922	0.606	0.524	0.0287339
Cc2d2a	0.0804209	0.145922	0.309	0.175	0.124398
Srsf1	0.0213327	0.145769	0.511	0.529	0.0483228
Prdx1	0.00507608	0.145704	1	1	0.0173271
Tnrc18	0.057933	0.145674	0.394	0.296	0.0970172
Mtss1	0.017116	0.145656	0.5	0.432	0.0417807
Isca2	0.0116985	0.145501	0.649	0.529	0.0318941
Sf1	0.0109953	0.145501	0.638	0.481	0.0302576
Nacc2	0.0387703	0.145307	0.383	0.257	0.0734188
Asah2	0.249482	0.145277	0.266	0.117	0.298432
Pam	0.0176724	0.145237	0.574	0.505	0.0427484
Mylk	0.273085	0.145087	0.202	0.165	0.319506
Erich4	0.0694477	0.145034	0.745	0.631	0.112023
Dlk1	0.490064	0.145018	0.191	0.049	0.51476
Fam53c	0.196801	0.144835	0.255	0.126	0.249956
Elovl5	0.236518	0.144835	0.213	0.146	0.287243
Rhoq	0.0852036	0.144679	0.33	0.189	0.12948
Cmc2	0.00565261	0.144544	0.681	0.602	0.0186663
Reep3	0.0117527	0.144357	0.574	0.505	0.0319825
Tmem9	0.00484045	0.144245	0.723	0.553	0.0167169
Nif3l1	0.0254499	0.144171	0.426	0.272	0.0551602
Cubn	0.00660049	0.144101	0.936	0.883	0.0209039
Smg9	0.34621	0.144078	0.234	0.078	0.384273
Syncrip	0.00807839	0.144023	0.638	0.621	0.0243013
Cxxc5	0.00417119	0.144005	0.862	0.743	0.0150522
Prrc2a	0.00900351	0.143898	0.649	0.539	0.0261483
Prkab1	0.0316404	0.143881	0.372	0.233	0.0639115
Sgsm2	0.0360162	0.143881	0.383	0.218	0.0695934
Hexim1	0.025974	0.143673	0.457	0.379	0.0556871
Chrna4	0.298935	0.14355	0.202	0.112	0.342256
Smn1	0.0133519	0.143529	0.564	0.451	0.0351602
Wdr26	0.00830852	0.143519	0.755	0.646	0.024752
Socs6	0.0276671	0.143439	0.394	0.282	0.0579157
Zfp950	0.0785702	0.143439	0.34	0.248	0.122308
Anapc11	0.0101245	0.14317	0.67	0.592	0.0285018
Meis1	0.482624	0.14317	0.17	0.068	0.508035
Gnai3	0.00998342	0.14312	0.713	0.67	0.0282393
Kcne1l	0.333175	0.143106	0.202	0.141	0.372373
Polr3c	0.0372756	0.143081	0.394	0.306	0.0712308
Pex6	0.00632286	0.142728	0.691	0.534	0.0202428
L2hgdh	0.0187523	0.142728	0.457	0.456	0.0443745
Pik3r2	0.0307887	0.142728	0.415	0.33	0.0628389
Tmem263	0.0444973	0.142728	0.394	0.223	0.0813799
Zdhhc5	0.056185	0.142728	0.351	0.282	0.0951196
Nudcd3	0.0208006	0.142478	0.585	0.515	0.0476485
Aftph	0.00824965	0.142466	0.596	0.505	0.0246419
Tbc1d23	0.110717	0.142326	0.298	0.184	0.159089
Fscn1	0.436306	0.142293	0.181	0.083	0.466802
Uchl5	0.0107972	0.142231	0.628	0.563	0.0299085
Clic4	0.00270769	0.142179	0.809	0.767	0.0109162
Insr	0.0209208	0.142116	0.489	0.374	0.0478198
Strip1	0.031605	0.141986	0.394	0.257	0.06389
Ints13	0.116333	0.14193	0.298	0.189	0.164614
Ube2a	0.00539683	0.141828	0.734	0.621	0.0180859
Zdhhc3	0.017479	0.141815	0.511	0.393	0.0424552
Helz	0.0105617	0.141696	0.606	0.476	0.0293809
1300002E11Rik	0.0266736	0.141696	0.404	0.306	0.056602
Gsk3a	0.0353399	0.141624	0.426	0.248	0.0688896
Slc16a10	0.0890127	0.141541	0.319	0.189	0.134158
Tcaf1	0.0536138	0.141361	0.404	0.262	0.092417
Nap1l4	0.00667299	0.141331	0.66	0.558	0.0210654
Zc3h7b	0.0439114	0.141267	0.362	0.252	0.0806597
Aqp11	0.00767301	0.141084	0.851	0.723	0.0233689
Lrrc19	0.100127	0.141031	0.394	0.286	0.146733
Acaca	0.179475	0.141031	0.287	0.136	0.233397
Borcs8	0.00782512	0.140949	0.67	0.481	0.0237093
Golga3	0.0476584	0.140914	0.383	0.267	0.0851077
Gbe1	0.0200894	0.140827	0.479	0.364	0.0463444
D430042O09Rik	0.319984	0.14078	0.245	0.209	0.361011
Bzw1	0.00136911	0.140753	0.915	0.845	0.00653859
Wdr82	0.0495162	0.140705	0.404	0.306	0.0870904
Lima1	0.0869152	0.140705	0.5	0.427	0.131401
Capns1	0.00189411	0.140624	0.809	0.801	0.00830865
Erbin	0.0191771	0.140567	0.67	0.529	0.0449095
Pcgf3	0.0466788	0.140567	0.383	0.286	0.0840619
G6pc3	0.0142834	0.140524	0.543	0.408	0.0367591
Ppp2r2d	0.0120263	0.14049	0.564	0.461	0.0323868
Snx25	0.49303	0.140442	0.181	0.058	0.517321
Ncoa1	0.0701534	0.140408	0.34	0.218	0.11279
Wasl	0.00497579	0.140301	0.819	0.728	0.0170243
Rnf139	0.0242237	0.140224	0.383	0.277	0.0532088
Nbn	0.129456	0.140224	0.277	0.155	0.179467
Edem1	0.0601657	0.140042	0.351	0.218	0.0997342
Hipk3	0.0831883	0.140042	0.351	0.214	0.127412
Tmem167	0.00364599	0.140021	0.851	0.786	0.0135812
Tmem97	0.0104711	0.140009	0.723	0.617	0.029198
4833418N02Rik	0.544631	0.140009	0.17	0.073	0.563219
Pds5a	0.0154369	0.139929	0.5	0.369	0.0391114
Prom1	0.0530434	0.139887	0.404	0.262	0.0916569
Slc16a2	0.211551	0.139831	0.245	0.141	0.264912
Rhobtb1	0.0262573	0.139701	0.574	0.413	0.0559781
Rnf216	0.0383198	0.139681	0.383	0.238	0.0726593
Trp53inp2	0.0457578	0.139636	0.457	0.417	0.0829113
Ogdh	0.0248725	0.139394	0.819	0.796	0.054269
Ncln	0.00760952	0.139166	0.681	0.602	0.0232769
Lbr	0.437923	0.139166	0.202	0.087	0.468191
Plekhh1	0.168733	0.139062	0.277	0.16	0.221669
Mrpl14	0.00213539	0.138996	0.84	0.782	0.00908236
Dennd5b	0.0517288	0.138975	0.33	0.209	0.0901726
Pdzd8	0.0296406	0.138901	0.394	0.277	0.0609187
Hook3	0.0206647	0.138884	0.628	0.539	0.0473768
Serinc3	0.022618	0.138836	0.511	0.33	0.0506278
Rbm15b	0.417927	0.138755	0.234	0.068	0.450913
Cad	0.226799	0.138687	0.266	0.155	0.278779
Phb	0.000684608	0.138672	0.915	0.908	0.0038325
Tom1	0.0523581	0.13863	0.383	0.228	0.0910535
Afap1l1	0.031067	0.138539	0.468	0.374	0.0633189
Asap1	0.0356036	0.138539	0.426	0.33	0.0691143
Cab39	0.0105667	0.138502	0.553	0.427	0.0293809
Pprc1	0.30338	0.138351	0.202	0.107	0.3464
Gtf3c4	0.117692	0.138318	0.309	0.189	0.166296
Strn4	0.0332406	0.138266	0.426	0.296	0.0662356
Epm2aip1	0.0183478	0.138245	0.5	0.354	0.0437696
Ap4s1	0.0219898	0.138245	0.521	0.369	0.0495233
Hmgn5	0.0210654	0.138161	0.553	0.515	0.0480369
Hspa13	0.0784121	0.137954	0.34	0.252	0.122127
Zfp236	0.333222	0.137954	0.223	0.107	0.372373
Rac1	0.00188876	0.137685	0.872	0.835	0.00830865
Tprkb	0.0133967	0.137658	0.787	0.762	0.0352173
Hsdl1	0.188817	0.137596	0.277	0.194	0.242224
Stat1	0.308256	0.137564	0.234	0.117	0.350605
Stxbp2	0.0137605	0.137396	0.702	0.641	0.0357245
Nfat5	0.077342	0.137384	0.383	0.374	0.120716
Rfng	0.0187019	0.137344	0.468	0.33	0.0443266
Wdr11	0.032159	0.137344	0.415	0.35	0.0646921
Sp1	0.035316	0.137298	0.394	0.267	0.0688896
Gcn1l1	0.0077665	0.137281	0.617	0.539	0.0236291
Asxl1	0.144876	0.137244	0.319	0.189	0.195765
Zfand3	0.0162228	0.137156	0.574	0.447	0.0404057
Mttp	0.664525	0.137104	0.138	0.034	0.672302
Gpx4	0.000924257	0.137097	1	1	0.00486097
Nfib	0.113696	0.13706	0.521	0.49	0.161917
Prkacb	0.018953	0.137045	0.457	0.325	0.0446695
Rdx	0.000557936	0.137032	0.979	0.942	0.00327955
Rcor3	0.0311282	0.136976	0.415	0.296	0.0633775
Ppp1r12a	0.0161874	0.136946	0.606	0.573	0.0403989
Snrnp70	0.00522164	0.136942	0.862	0.845	0.0176599
Slc43a2	0.187221	0.136897	0.277	0.165	0.240385
Nrip1	0.120396	0.136691	0.553	0.5	0.168979
Bckdha	0.0105536	0.136626	0.691	0.573	0.0293809
Tbc1d14	0.0146378	0.136555	0.511	0.437	0.0375396
Ptpn13	0.0162686	0.136555	0.734	0.636	0.0404854
Paf1	0.0204938	0.136458	0.436	0.354	0.0471663
Dynll1	4.27e-05	0.136449	0.989	0.99	0.000423595
Utrn	0.0121406	0.136446	0.681	0.684	0.0326155
Med22	0.192333	0.136432	0.255	0.146	0.245661
Emp3	0.461455	0.136432	0.16	0.097	0.489433
Nudt3	0.0296381	0.136347	0.415	0.282	0.0609187
D10Jhu81e	0.00502887	0.136337	0.872	0.835	0.0171859
Speg	0.0428023	0.136285	0.479	0.369	0.0792166
Col5a1	0.583996	0.136285	0.128	0.058	0.600093
Pigx	0.00467243	0.136255	0.819	0.723	0.0162795
BC025446	0.00883818	0.136248	0.713	0.617	0.0258205
Zfp945	0.0702278	0.136218	0.383	0.194	0.112848
Fads1	0.146253	0.136218	0.309	0.199	0.197174
Unc119	0.0262293	0.13617	0.447	0.296	0.0559781
Ap1s1	0.00829749	0.136107	0.787	0.714	0.024752
Stard8	0.079848	0.135886	0.34	0.214	0.123708
Mavs	0.0945753	0.135886	0.351	0.218	0.140595
Olfr655	0.751115	0.135886	0.106	0.087	0.752908
Notch1	0.226932	0.135707	0.255	0.146	0.278827
Zfp646	0.288222	0.135707	0.255	0.15	0.33206
Tinag	0.00286657	0.135591	0.915	0.908	0.0114239
1700020I14Rik	0.0155509	0.135559	0.755	0.694	0.0393323
Plxnb2	0.0336454	0.135494	0.713	0.699	0.066811
Zfp518a	0.432522	0.135494	0.213	0.078	0.463766
2700049A03Rik	0.453795	0.135494	0.202	0.073	0.482702
Pcyox1l	0.477397	0.135494	0.181	0.078	0.503976
Ly6e	0.0541376	0.135471	0.755	0.641	0.0929886
Commd2	0.00973409	0.13542	0.691	0.607	0.0276946
Sub1	0.00035586	0.13539	0.926	0.908	0.00228265
Hmga1	0.171286	0.135353	0.266	0.17	0.224336
Sucnr1	0.0242006	0.135109	0.628	0.583	0.0531979
Pear1	0.453794	0.135109	0.202	0.068	0.482702
Adgrg6	0.489398	0.135109	0.181	0.058	0.514244
Bnc2	0.137274	0.135005	0.33	0.15	0.187563
Tlcd2	0.18479	0.135005	0.287	0.136	0.237825
Sos2	0.260676	0.135005	0.266	0.165	0.308425
Sipa1l1	0.0165814	0.134982	0.564	0.393	0.0409176
Usp4	0.0184468	0.134982	0.521	0.442	0.043899
Polg	0.0603787	0.134919	0.415	0.228	0.10003
Rbp2	0.349203	0.134919	0.213	0.15	0.386421
Ralgapb	0.117053	0.134663	0.287	0.184	0.165473
Terf2ip	0.0339904	0.134606	0.415	0.262	0.067226
Usp48	0.0549733	0.134559	0.372	0.316	0.0939314
Mfsd12	0.0838877	0.134559	0.394	0.291	0.128205
Siva1	0.0168732	0.1344	0.596	0.515	0.0414636
Tmem64	0.338293	0.134359	0.234	0.097	0.377036
Fam160b2	0.338663	0.134359	0.255	0.102	0.377305
Csde1	0.0208417	0.134342	0.957	0.869	0.0477053
Ufc1	0.0019057	0.134336	0.883	0.782	0.00833947
Usp2	0.0110924	0.134274	0.819	0.748	0.0304659
Exosc2	0.0798448	0.134274	0.351	0.291	0.123708
Tmem205	0.00606137	0.133994	0.862	0.811	0.0196627
Cdc5l	0.00919671	0.133994	0.777	0.675	0.0266035
Psen2	0.0860218	0.133994	0.394	0.243	0.130386
S100pbp	0.331548	0.133994	0.234	0.102	0.371286
Ptov1	0.00339655	0.133826	0.915	0.835	0.0129642
Pdcd11	0.0166764	0.133793	0.649	0.505	0.0411173
Slc4a2	0.0368787	0.133694	0.383	0.296	0.0708408
Crocc	0.0404331	0.133694	0.415	0.228	0.0757379
Thoc2	0.0101478	0.133667	0.681	0.641	0.0285127
Egln2	0.0133382	0.133635	0.66	0.617	0.0351602
Kdm1b	0.326429	0.133635	0.213	0.112	0.366433
Hnrnpc	0.0108537	0.133572	0.83	0.83	0.0300085
Heatr6	0.03725	0.133398	0.372	0.282	0.0712308
Cenpb	0.0103146	0.133378	0.862	0.791	0.0288436
Arhgef40	0.24074	0.133281	0.277	0.131	0.290816
Dennd5a	0.313054	0.133281	0.234	0.112	0.354827
Polr2i	0.00525271	0.133257	0.83	0.796	0.0177241
Abcf2	0.0213061	0.133231	0.521	0.379	0.0483168
Eln	0.643854	0.133204	0.16	0.024	0.654771
Pafah1b2	0.0102196	0.133158	0.617	0.568	0.0286872
Mettl7b	0.0406825	0.133158	0.904	0.869	0.0761082
Cdk9	0.0179362	0.133107	0.628	0.49	0.0431926
Tmem251	0.0361169	0.133107	0.415	0.286	0.0696963
Ccdc167	0.105856	0.133028	0.309	0.238	0.15356
Traf4	0.00704335	0.132983	0.766	0.65	0.0219517
Zfp592	0.234315	0.132934	0.277	0.126	0.285274
Ube3b	0.032765	0.132907	0.468	0.364	0.0656418
Osbpl3	0.0281002	0.132677	0.606	0.461	0.0585305
Mut	0.0118479	0.132457	0.862	0.738	0.0321821
Usp40	0.0244444	0.132385	0.489	0.379	0.0536135
2022-03-06	0.019157	0.132336	0.734	0.684	0.0448982
Usp12	0.0163681	0.132256	0.649	0.5	0.0406299
Tmem41b	0.0190083	0.132256	0.564	0.422	0.0447598
Polr2d	0.115239	0.132256	0.319	0.282	0.16338
Uxs1	0.26273	0.132256	0.266	0.131	0.310182
Tmem35b	0.281838	0.132256	0.245	0.126	0.326755
Tmem29	0.046661	0.132105	0.372	0.248	0.0840619
Nr2c2	0.0705525	0.132105	0.351	0.209	0.113184
Ddx55	0.0844948	0.132105	0.309	0.228	0.128668
Smad3	0.0899624	0.132105	0.33	0.228	0.135104
Tgfbr1	0.0927826	0.132105	0.394	0.204	0.138632
Eaf2	0.023237	0.13209	0.638	0.558	0.0515554
Manf	0.00344556	0.131926	0.926	0.859	0.0130062
Atp9b	0.177469	0.131926	0.255	0.155	0.231325
Dtnb	0.0214281	0.131875	0.479	0.393	0.0484439
Psap	0.0100676	0.131853	0.926	0.903	0.0284234
Drg2	0.0135639	0.131844	0.628	0.51	0.0355932
Tmem183a	0.0233039	0.131822	0.745	0.641	0.0516517
Col6a2	0.559238	0.131708	0.149	0.063	0.577107
Rbbp9	0.01689	0.131659	0.755	0.714	0.0414702
Sdha	0.0015408	0.131554	0.947	0.961	0.00717119
Sart1	0.0165419	0.131554	0.606	0.437	0.0409176
Lpin2	0.0932237	0.13144	0.351	0.291	0.13922
Pdcd6ip	0.00854174	0.131401	0.745	0.66	0.0252383
Creb3l2	0.0494516	0.131378	0.468	0.359	0.0870288
Tgfb1i1	0.556859	0.131351	0.17	0.058	0.575056
Actr5	0.600847	0.131351	0.16	0.063	0.614864
Ppp6r1	0.0500079	0.131326	0.511	0.461	0.0877976
Psip1	0.0624817	0.131326	0.457	0.359	0.102818
Slc35b1	0.0181464	0.131314	0.766	0.597	0.0434656
Mdm4	0.0468332	0.131175	0.457	0.316	0.0842367
Kif1c	0.0547002	0.131175	0.404	0.325	0.0936306
Rnaseh2c	0.0133412	0.131147	0.702	0.583	0.0351602
Washc1	0.019517	0.131099	0.617	0.456	0.045416
Hmgcr	0.0423004	0.13107	0.511	0.466	0.0785847
Mapre2	0.0345878	0.130876	0.532	0.408	0.0680392
Bcl7c	0.00632099	0.130778	0.851	0.772	0.0202428
Tirap	0.405865	0.130316	0.234	0.083	0.440486
Lbh	0.516706	0.130316	0.149	0.083	0.537937
Itga9	0.538656	0.130316	0.138	0.083	0.558417
Afg3l1	0.0160342	0.130249	0.628	0.515	0.0401743
Atp1a1	0.00202297	0.130232	1	1	0.00870501
Eya3	0.35381	0.129983	0.202	0.112	0.390774
Adgrl1	0.418807	0.129983	0.181	0.107	0.451531
Cxxc1	0.0483172	0.129833	0.372	0.286	0.0857514
Aldh3a2	0.0564573	0.129833	0.372	0.291	0.0954158
Insig1	0.21333	0.129833	0.351	0.218	0.266772
Gtf2b	0.0238445	0.129795	0.585	0.471	0.0525723
Mtfmt	0.0722685	0.129753	0.319	0.199	0.115058
Adamts15	0.0897411	0.129753	0.319	0.204	0.13491
Slc45a4	0.113654	0.129753	0.33	0.194	0.161917
Setx	0.121948	0.129753	0.33	0.204	0.17045
P4hb	0.00337046	0.129719	0.979	0.971	0.0128982
2022-03-02	0.0274625	0.129655	0.457	0.325	0.0577072
Rbm5	0.0362246	0.129607	0.681	0.617	0.0698125
Tmem256	0.00372622	0.129534	0.968	0.966	0.013845
Dsp	0.121079	0.129462	0.287	0.184	0.169614
Cdc42ep2	0.185909	0.129462	0.287	0.18	0.239014
Nt5dc2	0.0264719	0.129428	0.585	0.5	0.0563367
Itpa	0.0220861	0.129379	0.553	0.476	0.0497022
Abhd3	0.28738	0.129333	0.255	0.112	0.331219
Armc6	0.339537	0.129333	0.223	0.121	0.378135
Atp13a3	0.0182799	0.129284	0.553	0.422	0.043649
Usp47	0.0169563	0.129175	0.638	0.466	0.0415634
Actr1a	0.0276524	0.129175	0.457	0.379	0.0579157
Cpsf7	0.114549	0.129175	0.33	0.194	0.162785
Tmem260	0.286094	0.129017	0.234	0.126	0.330645
St3gal3	0.0687662	0.128892	0.33	0.238	0.111253
Fam84b	0.135224	0.128892	0.287	0.214	0.185106
Ppp6r3	0.0260965	0.128849	0.553	0.447	0.0558554
Fbln5	0.770074	0.128822	0.106	0.015	0.771123
Gba	0.0438094	0.12879	0.415	0.277	0.0806236
Abracl	0.00867736	0.128741	0.83	0.777	0.0254518
Hdlbp	0.00737903	0.128687	0.968	0.961	0.0227565
Odc1	0.00887982	0.128676	0.883	0.835	0.0258977
Pin4	0.00566472	0.128538	0.809	0.733	0.0186817
Trps1	0.0186397	0.128505	0.755	0.718	0.0442148
Wnk1	0.0152488	0.128475	0.691	0.51	0.0387013
Mettl7a1	0.0890617	0.128475	0.596	0.505	0.134163
Cse1l	0.0687806	0.128339	0.372	0.214	0.111253
Zbtb38	0.0427056	0.128289	0.426	0.316	0.0791873
Akap11	0.0766955	0.128289	0.404	0.296	0.119851
Anxa11	0.0332418	0.128248	0.479	0.359	0.0662356
Slc25a17	0.0149955	0.128122	0.872	0.757	0.0382706
Brwd1	0.0381805	0.128024	0.457	0.388	0.0725365
Zfp326	0.0210682	0.128006	0.585	0.383	0.0480369
Ctr9	0.0292265	0.127968	0.66	0.558	0.060462
Pyroxd2	0.0404027	0.127802	0.415	0.306	0.0757293
Ncbp1	0.0591801	0.127802	0.436	0.311	0.0985563
Rpa3	0.0644158	0.127802	0.372	0.233	0.105352
Tollip	0.0709354	0.127802	0.33	0.252	0.113613
Cenpj	0.140149	0.127802	0.298	0.175	0.190456
Rnf38	0.247508	0.127802	0.255	0.15	0.296667
Eml4	0.3456	0.127802	0.223	0.121	0.383869
Epb41l3	0.593858	0.127802	0.16	0.049	0.608559
Smo	0.0263798	0.127599	0.5	0.417	0.0561813
Pank3	0.0257072	0.127583	0.532	0.408	0.0555315
Trib2	0.0577153	0.127563	0.415	0.282	0.0968734
Chmp3	0.0121733	0.127525	0.766	0.665	0.0326735
Olfml3	0.659664	0.127474	0.106	0.058	0.668535
Trim2	0.0515078	0.127327	0.383	0.32	0.0898872
Hoxa10	0.0343145	0.126941	0.511	0.388	0.0676848
Baiap2	0.043105	0.126941	0.457	0.354	0.0797266
Ireb2	0.0451919	0.126941	0.489	0.383	0.0821899
Glrx5	0.00138167	0.126922	0.936	0.922	0.00656016
Erp44	0.0194263	0.126865	0.745	0.786	0.0452766
Akap1	0.0509311	0.126774	0.415	0.267	0.0890462
Ankrd46	0.0556787	0.126774	0.415	0.252	0.0945348
Slc35c2	0.0252991	0.126732	0.553	0.403	0.0549548
2210011C24Rik	0.0265712	0.126732	0.532	0.388	0.0564661
Cbx6	0.198642	0.126663	0.298	0.175	0.252076
Slc25a42	0.446545	0.126526	0.191	0.083	0.476872
Peak1	0.460775	0.126526	0.191	0.083	0.489028
Fmn1	0.511674	0.126526	0.191	0.083	0.533455
Gm49179	0.585717	0.126526	0.149	0.063	0.601475
Sh3bgrl	0.249951	0.126389	0.245	0.165	0.298742
Nsdhl	0.0274858	0.126321	0.83	0.816	0.0577072
Nipsnap1	0.00537744	0.126306	0.936	0.903	0.0180415
Ftl1-ps1	0.0668026	0.126281	0.404	0.291	0.108624
Zcchc17	0.0120335	0.126254	0.67	0.714	0.0323868
Mapk1	0.0150009	0.12622	0.67	0.612	0.0382706
Ephb4	0.415472	0.12622	0.213	0.087	0.449089
Rbm14	0.144981	0.12612	0.287	0.214	0.195818
Ppil1	0.0266295	0.126058	0.564	0.505	0.0565492
Atp6ap1	0.0179442	0.12592	0.66	0.597	0.0431926
Arhgef10l	0.430577	0.12592	0.202	0.107	0.462018
Aktip	0.0188908	0.125885	0.745	0.665	0.0445587
Slmap	0.0190329	0.125875	0.585	0.495	0.0447598
Bscl2	0.0192531	0.125875	0.574	0.485	0.0449818
Mrgbp	0.150796	0.125854	0.309	0.199	0.202856
Pctp	0.161521	0.125854	0.266	0.214	0.21422
Ascc2	0.0490281	0.125802	0.468	0.286	0.086497
Eva1b	0.0738245	0.125693	0.489	0.417	0.116711
Hp1bp3	0.0257725	0.125667	0.617	0.519	0.0555473
2022-03-09	0.0212151	0.125514	0.628	0.485	0.048208
Ptms	0.00108237	0.12549	0.947	0.893	0.00548464
Brd2	0.0132008	0.125336	0.713	0.568	0.0349523
Unc119b	0.0446859	0.125336	0.436	0.291	0.0816243
Tram2	0.123103	0.125336	0.298	0.238	0.171632
Cyp2j13	0.130675	0.125336	0.394	0.306	0.180817
Utp14b	0.230549	0.125336	0.266	0.218	0.282209
Ncoa5	0.322433	0.125336	0.255	0.102	0.363216
Ubl5	0.000264713	0.125285	0.968	0.947	0.001822
Usp10	0.0163454	0.125172	0.628	0.539	0.040608
Cnn3	0.0259772	0.125145	0.532	0.403	0.0556871
Fbxw17	0.108242	0.125082	0.319	0.218	0.156194
Itpr1	0.0352765	0.124899	0.851	0.772	0.0688896
Taf13	0.0469195	0.124882	0.436	0.35	0.0843006
Chrac1	0.00580273	0.124771	0.798	0.699	0.0190085
2300009A05Rik	0.0331589	0.124771	0.787	0.796	0.0661602
Ebf1	0.479406	0.124771	0.16	0.102	0.505552
Igfbp5	0.0436199	0.124746	0.766	0.665	0.0803756
Abcb8	0.0282486	0.124643	0.564	0.515	0.0587639
Ube4a	0.0488216	0.12452	0.5	0.427	0.0862818
Phf8	0.227297	0.124495	0.255	0.141	0.279136
Zc3h4	0.30328	0.124495	0.234	0.136	0.3464
Rita1	0.324012	0.124495	0.191	0.136	0.364436
Serp1	0.00319861	0.124427	0.894	0.845	0.0124844
Cpsf6	0.0320418	0.124404	0.543	0.49	0.064598
Cherp	0.0894021	0.124344	0.34	0.252	0.134538
Usp34	0.0383033	0.124287	0.734	0.665	0.0726593
Ash1l	0.0493296	0.124224	0.67	0.602	0.0869704
Magi2	0.308022	0.124224	0.223	0.141	0.350475
Nt5m	0.0420323	0.124127	0.479	0.413	0.0781854
Cttn	0.0191074	0.124046	0.532	0.49	0.0448535
Epb41l5	0.0105973	0.12401	0.819	0.801	0.0294381
Rnf11	0.0159634	0.123957	0.702	0.592	0.0400374
Ppp1r11	0.0156083	0.12392	0.649	0.578	0.0393419
Tnpo1	0.0279276	0.123816	0.649	0.558	0.058295
Clk3	0.0288782	0.123799	0.468	0.33	0.0598962
0610012G03Rik	0.000422655	0.12379	0.979	0.922	0.00265424
Rnpepl1	0.0211694	0.123695	0.585	0.471	0.0481928
Calm3	2.92e-05	0.12366	0.989	0.971	0.000317118
Dpm2	0.0201682	0.123655	0.606	0.515	0.0464897
Cul2	0.080417	0.123637	0.34	0.272	0.124398
Cspg4	0.102337	0.123637	0.351	0.233	0.149487
Chmp6	0.0495885	0.123591	0.617	0.583	0.0871654
Add3	0.0390772	0.123565	0.67	0.65	0.0738838
Thap4	0.0321034	0.123554	0.553	0.432	0.0646246
Sfr1	0.00942186	0.123448	0.777	0.748	0.0271479
Gigyf2	0.048863	0.123437	0.745	0.626	0.0863031
Pik3r4	0.189465	0.123437	0.255	0.16	0.242948
Shkbp1	0.205921	0.123437	0.266	0.175	0.2593
G0s2	0.12257	0.123409	0.34	0.209	0.171015
Cdc42bpb	0.0490317	0.123386	0.436	0.325	0.086497
Msh3	0.0938676	0.123386	0.436	0.345	0.139897
Frg1	0.0180223	0.123352	0.574	0.471	0.0432866
Pgp	0.0236473	0.123328	0.66	0.524	0.052216
Ecsit	0.0135905	0.123183	0.787	0.748	0.035631
Prkar2a	0.0258128	0.123183	0.585	0.442	0.0555778
Usf3	0.0673362	0.123183	0.383	0.262	0.109338
3110040N11Rik	0.10903	0.123183	0.351	0.286	0.157001
Cc2d1a	0.128509	0.123183	0.309	0.175	0.178239
Rnf170	0.134662	0.123183	0.309	0.189	0.184768
Slc33a1	0.0203824	0.123065	0.745	0.704	0.0469465
Pigt	0.0334633	0.123065	0.702	0.718	0.0665418
Aif1l	0.0461906	0.122983	0.745	0.714	0.0834276
Ppp1ca	2.97e-05	0.122971	0.957	0.976	0.000320731
2700062C07Rik	0.155841	0.122933	0.309	0.175	0.208285
Brms1l	0.171649	0.122933	0.298	0.17	0.224711
Kdm7a	0.231516	0.122933	0.266	0.184	0.282952
Ranbp2	0.121624	0.12285	0.543	0.451	0.170215
Pigm	0.169434	0.122687	0.266	0.189	0.222306
Abcg2	0.0131887	0.122659	0.979	0.985	0.0349519
Prkcsh	0.0100955	0.122642	0.83	0.801	0.0284748
Elmod2	0.524817	0.122617	0.181	0.068	0.54561
Efcab14	0.0391164	0.122589	0.436	0.379	0.0738838
Polr2l	0.035391	0.122525	0.543	0.515	0.0688896
Ncoa2	0.0704817	0.122525	0.415	0.257	0.113133
Spen	0.119885	0.122525	0.351	0.277	0.168585
Rangap1	0.0246252	0.122466	0.532	0.447	0.053926
Uso1	0.0346331	0.122466	0.5	0.447	0.0680392
Letm1	0.0137164	0.122444	0.713	0.655	0.0357245
Pls3	0.164565	0.122444	0.277	0.175	0.217736
Zfp106	0.0176058	0.122396	0.84	0.738	0.0426575
Upf1	0.0637694	0.122311	0.415	0.267	0.104506
Cyld	0.0862574	0.122206	0.309	0.223	0.130621
U2af2	0.0162935	0.122206	0.702	0.612	0.0405132
Fam207a	0.042493	0.122101	0.436	0.325	0.0788925
Zbtb26	0.462647	0.122071	0.202	0.083	0.490342
Mrpl18	0.000961795	0.122054	0.926	0.893	0.00502974
Mtus1	0.0558774	0.122018	0.457	0.388	0.0947056
Ccnt2	0.0678942	0.122018	0.447	0.374	0.110183
Flcn	0.164101	0.121971	0.298	0.199	0.217249
Adcy6	0.200426	0.121971	0.287	0.194	0.253902
Fbxl15	0.0119314	0.121971	0.766	0.612	0.0322894
Ccdc127	0.0259516	0.12195	0.574	0.5	0.0556871
Prps2	0.458869	0.121805	0.223	0.083	0.487569
Zmynd11	0.0182813	0.12174	0.574	0.544	0.043649
Snd1	0.0292768	0.121704	0.617	0.583	0.0604669
Tceal8	0.0262653	0.121698	0.851	0.825	0.0559781
Wdr77	0.0543607	0.121648	0.457	0.383	0.0932668
Rabl6	0.0231453	0.121544	0.681	0.607	0.0514553
Scyl3	0.408417	0.121544	0.223	0.092	0.441788
Zbtb39	0.416166	0.121544	0.202	0.097	0.449178
Synj1	0.104587	0.121512	0.34	0.214	0.152094
Zdhhc12	0.0169113	0.121425	0.713	0.563	0.0414878
Timm9	0.0271718	0.121213	0.84	0.835	0.0573692
Fgd4	0.053665	0.12109	0.457	0.32	0.0924345
Entpd7	0.333853	0.121035	0.234	0.126	0.372794
Dna2	0.343942	0.121035	0.213	0.126	0.382317
Pgap1	0.362585	0.121035	0.223	0.112	0.398678
Mxra8	0.471696	0.121035	0.213	0.102	0.498495
Lman2	0.00257731	0.121025	0.894	0.791	0.0104768
Ntan1	0.0229025	0.120967	0.553	0.485	0.0510313
Clptm1	0.0120133	0.120935	0.904	0.835	0.0323868
Galm	0.0650073	0.120809	0.564	0.49	0.106143
Tfpi2	0.339867	0.120786	0.223	0.107	0.378359
Bloc1s1	0.0839285	0.120705	0.415	0.34	0.128205
Hipk2	0.0325436	0.120664	0.734	0.573	0.0653763
Txndc11	0.0314703	0.120591	0.543	0.447	0.0638311
AU040320	0.037538	0.120515	0.447	0.345	0.0716391
Tango2	0.082997	0.120515	0.404	0.369	0.127245
Smim12	0.0302231	0.120498	0.564	0.505	0.0618563
2022-03-02	0.000988704	0.120372	0.968	0.879	0.00513401
Crat	0.0403796	0.120255	0.5	0.5	0.0757293
Sema3b	0.0272803	0.120194	0.553	0.466	0.0574357
Ssfa2	0.0315026	0.120144	0.436	0.345	0.0638525
Opa3	0.0439532	0.120144	0.436	0.359	0.0806821
Thop1	0.0484907	0.120144	0.415	0.364	0.0858518
Srpk1	0.00756474	0.120115	0.809	0.796	0.0231867
Ubac2	0.0185076	0.120045	0.649	0.495	0.0440079
Kdelr2	0.0174316	0.120035	0.734	0.714	0.0424102
Lypla2	0.037136	0.119962	0.479	0.374	0.0712308
Abl2	0.202229	0.119834	0.266	0.16	0.255745
Fam213a	0.0156026	0.119805	0.947	0.874	0.0393419
Taok1	0.038181	0.11975	0.564	0.515	0.0725365
Tecr	0.000103684	0.119605	1	0.961	0.000870651
Map3k7cl	0.0382566	0.119605	0.457	0.383	0.0726332
Rdh11	0.0829849	0.119605	0.394	0.272	0.127245
Rbm22	0.0647518	0.11943	0.447	0.325	0.105843
Phkg2	0.220092	0.11938	0.287	0.165	0.272933
Tenm4	0.237806	0.11938	0.277	0.155	0.288211
Fam160a2	0.274852	0.11938	0.245	0.175	0.321061
Ei24	0.0223156	0.119363	0.66	0.641	0.0501419
Stard7	0.0227671	0.119269	0.702	0.66	0.0508454
Purb	0.0215014	0.119257	0.745	0.68	0.0485723
Map2k3	0.0257797	0.119257	0.564	0.383	0.0555473
Eid2	0.0698431	0.119257	0.415	0.32	0.11236
Hs6st1	0.0365034	0.119086	0.66	0.558	0.0702576
Nubp2	0.0725086	0.119022	0.415	0.301	0.115287
Impad1	0.0313604	0.118984	0.574	0.466	0.063652
Ulk2	0.183496	0.118941	0.298	0.194	0.236636
Bnip2	0.235207	0.118941	0.309	0.16	0.286124
Ulk4	0.656119	0.118833	0.138	0.049	0.665402
Bok	0.686429	0.118833	0.128	0.039	0.69208
Acot3	0.362007	0.118765	0.553	0.51	0.398479
Prkar1a	0.00417407	0.118671	0.851	0.869	0.0150522
Zswim8	0.0662484	0.118647	0.426	0.291	0.107869
Hacd4	0.0551369	0.11863	0.521	0.466	0.0939706
Mdc1	0.661083	0.118585	0.138	0.049	0.669281
Gtf3a	0.0276996	0.118547	0.67	0.607	0.0579424
Rtl8a	0.0944922	0.118463	0.394	0.325	0.140595
Tmem50b	0.559906	0.118342	0.181	0.063	0.57739
Amd1	0.195469	0.118307	0.287	0.18	0.248694
Arfgap2	0.0350102	0.118261	0.532	0.427	0.0686883
Ap2b1	0.0252173	0.118222	0.606	0.563	0.0548584
Stip1	0.016136	0.118204	0.798	0.67	0.0403264
Uqcrh	1.44e-05	0.118172	1	1	0.000174637
Ncbp2	0.0272153	0.118102	0.574	0.481	0.0573785
Ddx17	0.020636	0.118001	0.681	0.675	0.0473768
Iqsec1	0.0345745	0.117926	0.468	0.301	0.0680392
Fgfr1op	0.159596	0.117901	0.309	0.199	0.212337
Araf	0.0197563	0.117867	0.691	0.578	0.0458279
H6pd	0.0325913	0.11779	0.532	0.476	0.0654274
Bmp3	0.527365	0.117637	0.16	0.078	0.547677
1810041H14Rik	0.54315	0.117637	0.181	0.087	0.561886
Xpo1	0.0353341	0.117485	0.532	0.442	0.0688896
Brd9	0.0712443	0.11741	0.404	0.364	0.113814
Elp2	0.0741544	0.11741	0.404	0.345	0.117109
2900093K20Rik	0.428689	0.11741	0.202	0.102	0.460328
Rhpn1	0.481104	0.11741	0.17	0.107	0.506979
Lnx2	0.482069	0.11741	0.191	0.097	0.507814
Dut	0.0544367	0.11741	0.585	0.432	0.0932883
Ssr3	0.0178616	0.117378	0.862	0.883	0.0430642
Zcchc8	0.0977804	0.117314	0.319	0.238	0.143976
Setdb1	0.106707	0.117314	0.34	0.214	0.154413
Cand1	0.032282	0.117187	0.574	0.447	0.0648953
Ino80c	0.342964	0.117187	0.223	0.107	0.381374
Ankrd27	0.427551	0.117187	0.213	0.097	0.459273
Tmem150c	0.448298	0.117187	0.202	0.092	0.478239
Btbd3	0.475552	0.117187	0.191	0.107	0.50239
Lasp1	0.140523	0.117124	0.319	0.248	0.190761
Ctdsp1	0.0400865	0.117077	0.468	0.369	0.0753287
Spata2	0.403507	0.116968	0.234	0.102	0.43809
Pdgfc	0.407146	0.116968	0.223	0.107	0.4409
Yap1	0.113876	0.116936	0.362	0.214	0.161995
Tmem234	0.00271408	0.116913	0.926	0.883	0.0109269
Tarbp2	0.0399908	0.116752	0.479	0.364	0.0751971
Pip4k2c	0.0531148	0.116752	0.426	0.388	0.0917182
Snx14	0.0743202	0.116752	0.351	0.277	0.117308
Smarcal1	0.320408	0.116752	0.245	0.126	0.361212
Atg4d	0.0481451	0.116593	0.489	0.359	0.0856011
Carm1	0.0829062	0.11657	0.362	0.248	0.127238
Macrod2	0.0835632	0.11654	0.83	0.748	0.127846
Fignl2	0.310509	0.11654	0.255	0.126	0.352622
Ppp1r8	0.362595	0.11654	0.202	0.121	0.398678
Phf10	0.0416226	0.116436	0.511	0.393	0.0775705
Surf4	0.0120268	0.116401	0.862	0.786	0.0323868
Igsf11	0.114803	0.116391	0.351	0.248	0.162919
Tcf4	0.119414	0.116214	0.34	0.243	0.168156
Prss8	0.00653841	0.1162	0.968	0.917	0.0207745
Rap1b	0.0233905	0.116182	0.681	0.612	0.0517655
Tmem208	0.00814985	0.116163	0.872	0.777	0.0244143
Mfsd11	0.0849187	0.116127	0.468	0.369	0.12918
Fgfr2	0.28108	0.116127	0.255	0.136	0.326519
Ppcdc	0.287287	0.116127	0.277	0.141	0.331219
Snx16	0.310788	0.116127	0.245	0.141	0.352763
Stxbp4	0.3122	0.116127	0.245	0.126	0.353996
Ispd	0.0456667	0.116059	0.553	0.481	0.0828072
Susd2	0.061847	0.11604	0.681	0.646	0.10206
Ldah	0.0836459	0.11604	0.404	0.267	0.127906
Gtf3c2	0.0387489	0.115975	0.468	0.383	0.0734188
Ildr2	0.0968764	0.115975	0.426	0.359	0.143183
Arhgap35	0.272449	0.115925	0.255	0.155	0.319269
Slc30a7	0.320319	0.115925	0.234	0.15	0.361212
Cenpw	0.362304	0.115925	0.223	0.121	0.398657
Hira	0.112128	0.115868	0.34	0.272	0.160284
Krcc1	0.0123215	0.115846	0.766	0.723	0.0329469
Isoc1	0.0442153	0.115826	0.479	0.403	0.0809146
Usp9x	0.0246835	0.115803	0.713	0.704	0.0539769
Bag1	0.00334415	0.115787	0.904	0.883	0.0128813
Daam1	0.238107	0.115727	0.255	0.165	0.288337
Nt5dc1	0.279297	0.115727	0.277	0.16	0.324834
Zbtb7b	0.331618	0.115727	0.223	0.16	0.371286
Csnk2b	0.00532829	0.115699	0.883	0.83	0.017897
Mocs2	0.0310225	0.115629	0.691	0.641	0.063272
Taf2	0.0574453	0.115532	0.404	0.325	0.096641
Snapc2	0.151076	0.115532	0.277	0.184	0.203023
Mex3c	0.229878	0.115532	0.255	0.175	0.281539
Gdf11	0.361335	0.115532	0.202	0.146	0.398037
Pdlim2	0.446692	0.115532	0.16	0.141	0.476872
Dach1	0.0283693	0.115403	0.628	0.427	0.0589656
Pgghg	0.196978	0.11534	0.255	0.184	0.250073
C2cd5	0.283078	0.11534	0.245	0.165	0.327804
B230219D22Rik	0.0206627	0.115219	0.67	0.568	0.0473768
Lman2l	0.0587084	0.115204	0.394	0.311	0.0982038
Bend7	0.0615172	0.115204	0.436	0.252	0.101687
Pafah2	0.0610999	0.115188	0.606	0.578	0.101168
Slc3a1	0.0752736	0.115061	0.926	0.898	0.118241
Stx18	0.0480882	0.114965	0.606	0.515	0.0855952
Tbck	0.160153	0.114965	0.298	0.194	0.212885
Mkks	0.220388	0.114965	0.309	0.189	0.272974
Zfp821	0.243673	0.114965	0.277	0.18	0.293626
Mrpl22	0.0136652	0.114922	0.745	0.689	0.0357245
Ube3c	0.0651476	0.11473	0.447	0.316	0.106313
Susd6	0.0403198	0.114637	0.617	0.587	0.0756704
Dph2	0.649327	0.114637	0.16	0.034	0.658968
Pllp	0.741104	0.114637	0.128	0.029	0.743888
Ak4	0.121965	0.114601	0.66	0.757	0.17045
Cenpf	0.460907	0.114601	0.17	0.087	0.489028
Anapc4	0.0530047	0.114424	0.404	0.345	0.0916569
Phrf1	0.0721822	0.114424	0.394	0.32	0.114983
S100a13	0.0963353	0.114424	0.479	0.374	0.142635
Mlst8	0.658837	0.114424	0.16	0.044	0.667928
Tmem63b	0.0333572	0.114292	0.5	0.413	0.0664207
Ids	0.606926	0.114214	0.16	0.053	0.61975
Cdh4	0.641453	0.114214	0.16	0.049	0.652991
E2f4	0.0551546	0.114126	0.468	0.354	0.0939706
Ninj1	0.0357984	0.114052	0.787	0.748	0.0693093
Scly	0.0627562	0.114046	0.702	0.631	0.103212
Efna4	0.59912	0.114009	0.17	0.063	0.61331
Svopl	0.604343	0.114009	0.17	0.044	0.618011
Hmcn1	0.644337	0.114009	0.138	0.049	0.655035
Plpp3	0.0379338	0.113907	0.543	0.374	0.0722536
Asb6	0.596733	0.113807	0.16	0.068	0.611292
Otulin	0.0353292	0.113657	0.596	0.442	0.0688896
Akap9	0.0550037	0.113646	0.872	0.85	0.0939314
Pnpla6	0.0749182	0.113575	0.372	0.233	0.117872
Huwe1	0.0173712	0.113413	0.787	0.66	0.0422983
Letmd1	0.0868391	0.113413	0.372	0.267	0.131354
Ralgps2	0.0427885	0.113293	0.553	0.432	0.0792166
Nabp1	0.211098	0.113276	0.394	0.33	0.264683
Tmed6	0.125973	0.113253	0.319	0.228	0.174886
Clcn7	0.468197	0.113222	0.202	0.087	0.495688
Rbms3	0.488947	0.113222	0.202	0.083	0.513954
Wdr81	0.426672	0.113033	0.213	0.092	0.458664
Spg11	0.446884	0.113033	0.202	0.097	0.476903
Gm20342	0.478247	0.113033	0.191	0.092	0.504692
Slc38a2	0.0725755	0.112983	0.596	0.558	0.115297
Fam206a	0.418238	0.112848	0.213	0.112	0.451083
Tmem144	0.083193	0.112787	0.362	0.296	0.127412
Kbtbd11	0.0859416	0.112787	0.372	0.277	0.130331
H2afj	0.00212698	0.112774	0.904	0.864	0.00907286
Ctsa	0.0945506	0.112752	0.926	0.85	0.140595
Top1	0.00137491	0.112744	0.936	0.864	0.00653859
Clip4	0.492202	0.112666	0.17	0.107	0.516821
BC035947	0.526454	0.112666	0.191	0.107	0.547117
Ccdc50	0.0150796	0.11265	0.777	0.67	0.0384378
Clcn4	0.0588648	0.112615	0.468	0.364	0.0982337
Ak6	0.0251017	0.112587	0.66	0.563	0.0546473
Sypl	0.0141803	0.112551	0.862	0.811	0.0365257
Abhd12	0.0666931	0.112488	0.415	0.296	0.108533
Copg1	0.0231291	0.112399	0.713	0.626	0.0514553
Kpna6	0.0451801	0.112377	0.564	0.524	0.0821899
Pqbp1	0.081897	0.112341	0.383	0.286	0.126005
Mgat5	0.358916	0.112312	0.223	0.131	0.395672
Vps13d	0.140183	0.112196	0.415	0.277	0.190456
Tomm7	0.00363012	0.112145	0.957	0.942	0.0135564
Pno1	0.0415721	0.112114	0.543	0.422	0.0775256
Mmab	0.0966377	0.112053	0.372	0.33	0.142938
Tesk1	0.0997803	0.112053	0.394	0.286	0.146408
Ap3d1	0.0455615	0.112053	0.574	0.485	0.0827085
Asb13	0.0453284	0.111873	0.5	0.427	0.0823872
Trim11	0.302281	0.111802	0.255	0.155	0.345425
Pcdh7	0.22104	0.111754	0.447	0.33	0.273416
Mapk1ip1l	0.0320591	0.111739	0.628	0.563	0.064598
Pcmtd1	0.0600596	0.111739	0.596	0.505	0.0996974
Snrpf	0.0199438	0.111695	0.787	0.748	0.0461534
Col4a5	0.0593644	0.111637	0.436	0.325	0.098739
Il13ra1	0.0668228	0.111637	0.447	0.296	0.108624
Sfxn2	0.0293054	0.111529	0.851	0.791	0.0604836
Mtfr1	0.0642376	0.111521	0.553	0.451	0.105129
Atp13a2	0.213076	0.111475	0.287	0.184	0.266595
Prpf40a	0.00781352	0.111422	0.819	0.777	0.0237093
Plec	0.0670499	0.111368	0.457	0.301	0.108933
Kmt5c	0.0817173	0.111368	0.404	0.291	0.125817
Gm17634	0.211898	0.111316	0.266	0.165	0.265233
Rap1gds1	0.156232	0.111159	0.319	0.175	0.208712
Nsmf	0.173053	0.111159	0.287	0.184	0.226448
Actn1	0.152733	0.111107	0.351	0.291	0.204875
Timp2	0.32126	0.111004	0.223	0.146	0.362033
Bag6	0.0262139	0.110928	0.755	0.699	0.0559781
Uqcr10	0.00124869	0.110869	1	1	0.00609617
Ipo4	0.0728977	0.110852	0.415	0.335	0.115559
Abcb7	0.134387	0.110703	0.298	0.209	0.184562
Lurap1l	0.194027	0.110703	0.287	0.184	0.247609
Akr1b3	0.205753	0.110703	0.277	0.209	0.2593
Nme4	0.0711815	0.110604	0.415	0.335	0.113814
Ppp1r12c	0.131892	0.110555	0.309	0.228	0.182071
Smim11	0.0301411	0.110482	0.628	0.549	0.0617316
Strbp	0.0187897	0.110362	0.809	0.748	0.0443913
Synj2bp	0.0408835	0.110303	0.66	0.568	0.0763868
1810013L24Rik	0.164617	0.110267	0.309	0.233	0.217736
Smpd2	0.0420953	0.110073	0.851	0.806	0.0782531
Adipor2	0.0311389	0.110057	0.734	0.694	0.0633775
Eif4g2	0.00831243	0.109988	0.979	0.985	0.024752
Umad1	0.112745	0.109988	0.34	0.238	0.16101
Gas2	0.0258446	0.109959	0.957	0.961	0.0556056
Slc25a22	0.70641	0.109953	0.138	0.039	0.711494
Hnrnph2	0.0419277	0.109929	0.596	0.5	0.0780896
Gon4l	0.0614747	0.109896	0.511	0.364	0.101674
Tsn	0.00999282	0.109861	0.84	0.786	0.0282393
Grk2	0.0791999	0.109851	0.372	0.267	0.123158
Pcsk5	0.0961154	0.109851	0.34	0.233	0.142381
Smtn	0.0447735	0.109832	0.532	0.534	0.0817324
Gm10283	0.644643	0.109617	0.149	0.053	0.65512
Yipf5	0.0222181	0.109453	0.745	0.568	0.0499609
Trabd	0.0297893	0.109453	0.691	0.573	0.0611815
Fkbp10	0.589651	0.109453	0.181	0.063	0.604881
Znhit6	0.0601663	0.109345	0.511	0.388	0.0997342
Ltn1	0.0987007	0.109324	0.34	0.282	0.145259
Oaz1	0.000105273	0.109292	0.989	0.966	0.000881473
Gm13205	0.593827	0.109292	0.17	0.068	0.608559
Arvcf	0.597396	0.109292	0.17	0.073	0.611759
Sec24b	0.0827655	0.109197	0.372	0.277	0.127089
Gigyf1	0.101729	0.109197	0.372	0.252	0.148783
Snrpb	0.00222052	0.109165	0.926	0.883	0.009323
Vmac	0.50864	0.109134	0.191	0.083	0.531041
Zbtb34	0.534792	0.109134	0.181	0.078	0.554802
Ltbp4	0.541463	0.109134	0.17	0.083	0.560535
Clcn6	0.548059	0.109134	0.181	0.073	0.566565
Dlg5	0.551261	0.109134	0.17	0.083	0.569676
Agfg2	0.450111	0.108979	0.191	0.097	0.47965
Hoxd11	0.607098	0.108979	0.128	0.073	0.61975
Tmco1	0.0145557	0.108927	0.904	0.879	0.0373907
Zfp445	0.0477646	0.108927	0.5	0.432	0.0852339
Luc7l2	0.0282523	0.10892	0.798	0.743	0.0587639
Usp15	0.0345828	0.108913	0.617	0.519	0.0680392
Nudt2	0.0275546	0.108826	0.734	0.612	0.0577625
Podn	0.461645	0.108826	0.202	0.092	0.489457
Crtc1	0.500047	0.108826	0.202	0.107	0.523375
Gpr137b	0.0435191	0.108771	0.766	0.83	0.08024
Pard3b	0.446299	0.108676	0.191	0.097	0.476799
Fbxl19	0.513011	0.108676	0.191	0.102	0.534469
Tmem245	0.178244	0.108627	0.436	0.393	0.232207
Mta2	0.0738627	0.108587	0.426	0.301	0.116711
Nxt1	0.0799516	0.108587	0.383	0.291	0.123803
Mlxipl	0.095025	0.108587	0.383	0.272	0.141192
Pkp4	0.0550597	0.108529	0.638	0.607	0.0939541
Zbtb45	0.420298	0.108529	0.223	0.112	0.45264
Ppcs	0.0367	0.108487	0.681	0.568	0.0705437
Slc5a9	0.0793824	0.10847	0.351	0.32	0.123311
Anapc1	0.100039	0.10847	0.372	0.282	0.146714
Arf2	0.415968	0.108384	0.223	0.112	0.449178
Ppp1r9b	0.425301	0.108384	0.213	0.117	0.457358
Bicd2	0.429016	0.108384	0.191	0.121	0.460511
Zbtb18	0.468383	0.108384	0.213	0.117	0.495707
Cdh11	0.663297	0.108384	0.128	0.078	0.671291
Atg16l1	0.39029	0.108241	0.213	0.141	0.425942
Arhgef12	0.0168238	0.108161	0.617	0.505	0.0414112
Fras1	0.0553078	0.108055	0.532	0.456	0.0941225
Mark3	0.0269899	0.108018	0.755	0.743	0.0571906
D030045P18Rik	0.179911	0.108018	0.309	0.296	0.233757
Mindy2	0.0508843	0.107964	0.553	0.442	0.0890173
Ucp2	0.167455	0.107964	0.383	0.388	0.220497
Fbxo34	0.277362	0.107964	0.266	0.146	0.323222
Alkbh8	0.0698473	0.107909	0.415	0.359	0.11236
Npb	0.424854	0.107909	0.234	0.194	0.457045
Iqce	0.270388	0.107828	0.245	0.15	0.317614
Dcaf11	0.029397	0.107695	0.681	0.607	0.0605874
Leprot	0.0840045	0.107695	0.468	0.316	0.128235
Smarcd1	0.0726478	0.10759	0.426	0.354	0.115328
Abhd13	0.26213	0.107564	0.255	0.18	0.309663
Trp53rka	0.271628	0.107564	0.266	0.17	0.318816
Ubiad1	0.282402	0.107564	0.277	0.17	0.327176
Sec16a	0.0660177	0.107486	0.436	0.393	0.107553
Arl5b	0.272063	0.107435	0.245	0.175	0.319071
Sgms2	0.046213	0.107282	0.5	0.354	0.0834276
Vps18	0.191833	0.107183	0.319	0.199	0.245323
Ankrd39	0.215161	0.107183	0.255	0.199	0.268053
Rab11fip5	0.221016	0.107183	0.298	0.165	0.273416
Nmrk1	0.0299028	0.107121	0.745	0.612	0.0613717
Ubr5	0.110751	0.107121	0.734	0.665	0.159089
Oxnad1	0.0715071	0.107084	0.479	0.374	0.114031
Ncoa6	0.168363	0.10706	0.319	0.204	0.221495
Pex26	0.229225	0.10706	0.255	0.204	0.281174
Calr	0.00148563	0.106929	1	1	0.00698602
Morc2a	0.159136	0.106819	0.287	0.223	0.211821
2810001G20Rik	0.361988	0.106819	0.255	0.199	0.398479
Wdr33	0.0591874	0.106795	0.447	0.335	0.0985563
Ndufa3	0.0163944	0.106702	0.979	0.995	0.0406609
Pkp2	0.0554748	0.106702	0.457	0.413	0.0942975
Hmg20b	0.042736	0.10665	0.787	0.728	0.0791936
Vps4b	0.103632	0.106624	0.521	0.544	0.150929
Ppp2r5d	0.142749	0.106586	0.309	0.223	0.193425
Uimc1	0.179002	0.106586	0.319	0.218	0.232885
Nptn	0.0460318	0.106517	0.532	0.442	0.0832026
Arl5a	0.0572425	0.106517	0.468	0.383	0.0964654
Adam15	0.0655069	0.106249	0.479	0.408	0.10684
Cog1	0.119466	0.106249	0.33	0.262	0.168156
Trip4	0.133409	0.106249	0.309	0.243	0.183691
Arl4a	0.306105	0.106249	0.255	0.204	0.348969
Pxn	0.0578079	0.106162	0.543	0.417	0.0969181
Gpm6a	0.0854523	0.106086	0.745	0.631	0.12979
Veph1	0.198768	0.106064	0.649	0.587	0.252127
Ss18	0.0881442	0.106033	0.362	0.282	0.132986
Mertk	0.181803	0.106033	0.309	0.252	0.235487
Hsd17b4	0.0475794	0.106009	0.766	0.782	0.0851055
Ccdc88c	0.0588934	0.105991	0.521	0.408	0.0982337
Lrrcc1	0.109855	0.105962	0.511	0.379	0.158112
Vps13b	0.120712	0.105927	0.362	0.257	0.169262
Ldlrad3	0.150855	0.105927	0.351	0.238	0.202856
Aspdh	0.0402417	0.105906	0.511	0.398	0.0755721
Guca2b	0.475856	0.105882	0.553	0.476	0.50253
Mbd1	0.110473	0.105823	0.351	0.257	0.158845
Nufip2	0.0537572	0.105754	0.617	0.573	0.0924627
Acp5	0.228239	0.10572	0.266	0.228	0.280081
Magoh	0.0354941	0.105706	0.67	0.631	0.0689472
Tspan31	0.0269146	0.105641	0.787	0.806	0.0570722
Mrps11	0.0345729	0.105619	0.66	0.558	0.0680392
Ptcd2	0.0464084	0.105619	0.638	0.587	0.0837289
Snx17	0.0228191	0.105552	0.809	0.767	0.0508841
Msrb2	0.0936005	0.105519	0.394	0.286	0.139593
Ibtk	0.137717	0.105519	0.394	0.238	0.188081
Lmna	0.0156039	0.105464	0.872	0.762	0.0393419
Arhgdia	0.0130525	0.105448	0.936	0.888	0.0347162
Tmem104	0.691974	0.10542	0.149	0.034	0.697432
Mccc1	0.244466	0.105377	0.798	0.723	0.294461
Dgcr2	0.113766	0.105228	0.351	0.291	0.161917
Zfp40	0.648841	0.105164	0.17	0.049	0.658703
Hbb-bs	0.660229	0.105164	0.16	0.049	0.668647
Zzz3	0.0484624	0.105114	0.564	0.471	0.0858518
Plin2	0.0472397	0.10504	0.617	0.568	0.0847087
1110034G24Rik	0.624936	0.10504	0.16	0.058	0.637296
Cuedc1	0.642927	0.10504	0.149	0.063	0.654054
Ikbip	0.0869999	0.10504	0.415	0.33	0.131462
Gk5	0.0899457	0.10504	0.404	0.282	0.135104
Cacul1	0.108567	0.10504	0.351	0.32	0.156564
1810058I24Rik	0.0196278	0.104955	0.851	0.888	0.0455656
Cant1	0.073806	0.104948	0.404	0.316	0.116711
Zfp62	0.126194	0.104948	0.362	0.32	0.17511
Lyst	0.603456	0.104918	0.16	0.063	0.617319
Car4	0.0396226	0.104835	0.894	0.942	0.0747438
Epha1	0.565044	0.104797	0.191	0.078	0.582076
Caskin2	0.569306	0.104797	0.181	0.083	0.585646
Elac1	0.584167	0.104797	0.191	0.073	0.600093
Rnf34	0.0731094	0.104679	0.436	0.335	0.11577
Slc7a4	0.505655	0.104679	0.191	0.087	0.528116
Wrb	0.58629	0.104679	0.16	0.078	0.601853
Slc5a11	0.0912961	0.104679	0.468	0.505	0.136758
Dnaja1	0.0098094	0.104665	0.957	0.961	0.027828
Gsta2	0.138268	0.104634	0.957	0.956	0.188483
Trio	0.117827	0.104592	0.404	0.286	0.166408
Gm15417	0.504686	0.104563	0.181	0.102	0.527479
Rab32	0.524436	0.104563	0.191	0.083	0.545406
Zfp65	0.539806	0.104563	0.17	0.087	0.559411
Klhl42	0.541396	0.104563	0.191	0.092	0.560535
Srsf2	0.00867559	0.104546	0.894	0.845	0.0254518
Cox5b	0.000355321	0.104525	1	0.995	0.00228265
Tmem39b	0.0744031	0.104506	0.404	0.311	0.117313
Arid4a	0.181609	0.104506	0.372	0.286	0.23535
Cdk16	0.0433982	0.104472	0.564	0.495	0.0800871
Brpf1	0.450777	0.10445	0.213	0.097	0.480012
Mrpl3	0.0487528	0.104405	0.606	0.485	0.0862121
Xpc	0.0695182	0.104338	0.447	0.35	0.112076
Cry2	0.406495	0.104338	0.245	0.117	0.440682
Abhd8	0.459575	0.104338	0.213	0.097	0.48806
Sidt2	0.0708942	0.104255	0.489	0.383	0.113608
Lemd2	0.071418	0.104255	0.479	0.359	0.113951
Slc12a2	0.459663	0.104228	0.202	0.092	0.48806
Elmo2	0.508879	0.104228	0.191	0.107	0.531041
Asb9	0.0544257	0.104214	0.766	0.733	0.0932883
Hyou1	0.121936	0.104093	0.479	0.369	0.17045
Slirp	0.0119063	0.104084	0.84	0.811	0.0322512
Nudt7	0.433174	0.104013	0.223	0.112	0.464126
Ints9	0.454455	0.104013	0.181	0.131	0.483228
Bdp1	0.0642436	0.103857	0.5	0.35	0.105129
Slc37a3	0.0764043	0.103857	0.479	0.398	0.119506
Trappc5	0.0372373	0.103755	0.681	0.65	0.0712308
Ankrd13c	0.122602	0.103755	0.745	0.617	0.171015
Bptf	0.036169	0.103704	0.691	0.578	0.0697512
Dync2h1	0.267336	0.103704	0.234	0.155	0.314531
Ccdc77	0.308747	0.103704	0.277	0.136	0.351028
Ttf1	0.335182	0.103704	0.255	0.146	0.373994
Anks1	0.363849	0.103704	0.234	0.15	0.399908
Caprin1	0.0233235	0.103671	0.862	0.83	0.0516562
Myo1c	0.079324	0.103629	0.426	0.388	0.123286
Rock1	0.0617867	0.103507	0.617	0.626	0.10206
Atg2a	0.281764	0.103507	0.255	0.184	0.326755
Smg1	0.0618911	0.10313	0.489	0.442	0.102075
Cog2	0.178561	0.10313	0.33	0.209	0.232414
Hltf	0.351681	0.10313	0.255	0.184	0.38886
Surf2	0.0531672	0.103062	0.5	0.437	0.0917525
Cul4a	0.057294	0.102995	0.553	0.437	0.0964969
D17Wsu92e	0.0484427	0.102863	0.66	0.631	0.0858518
Cftr	0.199682	0.102863	0.287	0.204	0.253068
Bicd1	0.223397	0.102863	0.277	0.184	0.275537
Mrps24	0.00494596	0.102826	0.894	0.908	0.0169419
Acot2	0.0703945	0.102798	0.574	0.437	0.113054
Mitd1	0.194291	0.102776	0.319	0.199	0.247693
Yeats4	0.0441023	0.102759	0.649	0.578	0.0808347
Calm1	0.00326445	0.102753	1	0.966	0.0126573
Mob4	0.0315874	0.102708	0.734	0.612	0.06389
Dnajc14	0.166893	0.102691	0.309	0.228	0.220152
Spred1	0.177157	0.102691	0.298	0.199	0.231201
Herc4	0.259316	0.102691	0.287	0.243	0.307435
Mrfap1	0.00188744	0.102608	0.968	0.932	0.00830865
Picalm	0.0798004	0.102608	0.862	0.82	0.123708
Selenop	0.0439785	0.102545	0.5	0.427	0.0806821
Zfp644	0.0529992	0.102545	0.521	0.398	0.0916569
Atxn7	0.140969	0.102525	0.319	0.252	0.191277
Myo7b	0.0969082	0.102443	0.383	0.248	0.143183
Golga7	0.0472851	0.102423	0.543	0.529	0.0847384
Kdm5b	0.0552386	0.102423	0.553	0.451	0.0940593
D8Ertd738e	0.00976507	0.102419	0.936	0.927	0.027729
Sumf2	0.125375	0.102363	0.362	0.262	0.174221
Fem1a	0.133782	0.102284	0.372	0.252	0.183903
Tns3	0.169228	0.102284	0.34	0.238	0.222135
Il1rap	0.205477	0.102284	0.298	0.209	0.259184
Thoc1	0.106106	0.102206	0.351	0.282	0.153815
Vps11	0.106491	0.102206	0.383	0.277	0.154175
Kctd2	0.151211	0.102206	0.351	0.257	0.203112
Aimp2	0.0494225	0.102129	0.543	0.519	0.0870288
Cox19	0.0340723	0.102092	0.745	0.738	0.0673426
Rnf10	0.0531971	0.102039	0.691	0.617	0.0917525
Trmt1l	0.118957	0.101979	0.362	0.296	0.1676
Ctdsp2	0.0482164	0.101797	0.543	0.5	0.0856759
Usp46	0.0789778	0.101621	0.394	0.316	0.122878
Sh2b1	0.0879964	0.101621	0.436	0.325	0.132831
2510039O18Rik	0.0956324	0.101621	0.394	0.325	0.141951
Nek6	0.0863104	0.101485	0.436	0.33	0.130621
Pabpn1	0.219197	0.101444	0.638	0.524	0.272168
Nacc1	0.0795604	0.101418	0.426	0.325	0.123522
Sgk3	0.144161	0.101418	0.415	0.325	0.194889
Plod3	0.113697	0.101352	0.415	0.316	0.161917
Ppdpf	0.0379947	0.101325	0.681	0.621	0.0723228
Eif4h	0.0183661	0.101311	0.862	0.825	0.0437776
Ubp1	0.111267	0.101287	0.383	0.345	0.159596
Iqgap1	0.0576446	0.101238	0.564	0.442	0.096853
Tmem19	0.0761653	0.101209	0.723	0.723	0.119323
Calu	0.0419544	0.10119	0.638	0.529	0.07809
Scamp3	0.0237114	0.101171	0.766	0.665	0.0523181
Doc2g	0.827915	0.101004	0.106	0.01	0.828761
Zbed3	0.122526	0.100853	0.415	0.354	0.171015
Pitrm1	0.0902923	0.100795	0.415	0.369	0.135392
4921539H07Rik	0.726681	0.100737	0.138	0.029	0.730659
Spry2	0.73437	0.100737	0.138	0.039	0.738138
Gas2l3	0.739978	0.100737	0.128	0.039	0.743012
Map3k21	0.744625	0.100737	0.128	0.039	0.746912
Tmem79	0.750772	0.100737	0.128	0.039	0.752821
Tmem87b	0.0708145	0.100679	0.468	0.417	0.113543
Cacybp	0.01929	0.100623	0.851	0.733	0.0450305
[truncated: 948 more rows]

## Sheet: N.tubule2_AHL.MutVsCTRL.DEGs
Gene	p_val	avg_logFC	pct.1	pct.2	p_val_adj
Rpl29	2.28867e-24	-0.349747	0.983	1	1.11069e-20
Eif3j1	6.62318e-15	0.864578	0.746	0.54	1.60711e-11
Irak1bp1	4.94896e-14	0.68931	0.729	0.267	8.00577e-11
Rps2	1.07032e-13	0.468356	1	1	1.29856e-10
Snrpf	7.03297e-12	0.630734	0.847	0.913	6.8262e-09
Usp50	1.98229e-11	0.619029	0.678	0.447	1.47266e-08
Hmgn2	2.12417e-11	0.765165	0.831	0.853	1.47266e-08
Ubc	2.94878e-11	-0.410868	0.966	1	1.78881e-08
H2afz	4.20791e-11	1.05948	0.966	0.98	2.05429e-08
Etnk1	4.23303e-11	-0.703399	0.814	0.973	2.05429e-08
Uba52	7.3808e-11	0.501863	1	0.967	3.25628e-08
mt-Nd1	1.18042e-10	0.489739	0.983	1	4.30723e-08
Ptma	1.23763e-10	0.71113	1	1	4.30723e-08
Nt5dc2	1.24256e-10	0.605219	0.881	0.8	4.30723e-08
Gm10260	1.34529e-10	1.62303	0.542	0.02	4.35245e-08
Banf1	3.15916e-10	0.626793	0.831	0.827	9.58212e-08
Calr	8.60019e-10	0.477714	0.983	0.993	2.4551e-07
Tesc	9.18153e-10	-0.933563	0.458	0.72	2.47544e-07
Srsf7	1.60428e-09	0.623941	0.814	0.747	4.09768e-07
Ywhae	1.88843e-09	0.429447	0.949	0.993	4.58228e-07
Hnrnpab	2.77194e-09	0.594216	0.915	0.953	6.40581e-07
Fdps	3.11637e-09	0.677573	0.729	0.553	6.87442e-07
mt-Nd4	4.21091e-09	0.362894	1	1	8.88501e-07
Dhcr24	5.98844e-09	0.546176	0.576	0.2	1.21091e-06
Rps21	8.20831e-09	0.400069	1	1	1.5934e-06
Snrpb	1.0718e-08	0.510807	0.983	0.98	2.00055e-06
Ciapin1	1.22494e-08	0.606844	0.78	0.727	2.20171e-06
Eif5a	1.35006e-08	0.488123	0.966	1	2.33994e-06
Hmga1	1.91946e-08	0.618706	0.559	0.3	3.21212e-06
Snrpg	2.4974e-08	0.579977	0.864	0.913	4.03996e-06
Smarca4	3.3303e-08	0.689587	0.678	0.487	5.21353e-06
Erh	5.0494e-08	0.560773	0.797	0.76	7.65774e-06
Ran	5.40605e-08	0.645182	0.898	0.967	7.95018e-06
Ubac2	5.94275e-08	0.493459	0.678	0.447	8.47945e-06
Fkbp4	6.11541e-08	0.446617	0.966	0.98	8.47945e-06
Blvrb	6.51257e-08	-0.510355	0.542	0.773	8.7793e-06
mt-Cytb	7.58811e-08	0.349777	0.983	1	9.95273e-06
Lsm6	1.01632e-07	0.493649	0.814	0.733	1.29794e-05
Phf5a	2.16219e-07	0.505955	0.763	0.78	2.69054e-05
Srsf2	2.76097e-07	0.572377	0.864	0.92	3.27599e-05
Slc1a5	2.76768e-07	0.5451	0.593	0.333	3.27599e-05
Ptges3	3.37269e-07	0.486442	0.864	0.8	3.89706e-05
H1fx	4.48875e-07	1.04396	0.695	0.627	5.06603e-05
Sec61g	5.25098e-07	0.442794	0.966	1	5.79159e-05
Srsf3	6.56453e-07	0.592543	0.949	0.94	7.07948e-05
Hmgn1	8.16375e-07	0.459345	0.983	0.987	8.61275e-05
Gadd45gip1	9.32215e-07	0.477622	0.763	0.667	9.62561e-05
Stmn1	1.12513e-06	1.07806	0.763	0.653	0.000113756
Hint1	1.20637e-06	0.455352	0.983	0.993	0.00011948
Nectin3	1.23192e-06	0.569704	0.678	0.373	0.00011957
Cct7	1.3555e-06	0.422665	0.949	0.913	0.000126567
Ptn	1.37935e-06	1.06242	0.525	0.313	0.000126567
Rnaseh2c	1.38225e-06	0.637981	0.78	0.573	0.000126567
mt-Atp6	1.48573e-06	0.264399	1	1	0.000133523
Siva1	2.05352e-06	0.534459	0.78	0.767	0.000181195
Rpl41	2.12187e-06	0.355727	1	1	0.000183882
Eif1ax	2.34163e-06	0.428777	0.864	0.86	0.000199368
mt-Nd4l	3.00856e-06	0.260937	0.966	0.987	0.000251734
mt-Co3	3.30528e-06	0.255785	1	1	0.000271873
Tma7	3.48657e-06	0.412056	0.966	1	0.000278082
Ppp1r14b	3.49537e-06	0.454147	0.966	0.96	0.000278082
Arpc2	3.63639e-06	0.402755	0.966	0.973	0.000284635
Nucks1	3.7822e-06	0.6065	0.864	0.927	0.000291349
Pin1	4.07458e-06	0.41799	0.797	0.68	0.000308968
Rbm3	4.93498e-06	0.514235	0.915	0.92	0.000368453
Ranbp1	5.04717e-06	0.608628	0.831	0.827	0.00037112
Exosc8	5.32473e-06	0.496996	0.492	0.367	0.000385685
Hspa5	5.42861e-06	0.384293	0.949	0.953	0.000387427
Nme1	6.0099e-06	0.570594	0.898	0.913	0.000418532
mt-Co2	6.03693e-06	0.26552	1	1	0.000418532
Selenoh	6.58392e-06	0.596626	0.78	0.82	0.000450025
Hnrnpm	6.69282e-06	0.455926	0.898	0.867	0.000451115
Pantr1	6.79756e-06	-0.346098	0.814	0.953	0.000451898
Gm10076	7.31252e-06	0.492671	0.814	0.833	0.000479563
Txndc5	7.42576e-06	0.444967	0.712	0.653	0.000480496
Snrpd1	7.73321e-06	0.506238	0.831	0.887	0.000493806
Fdft1	7.95077e-06	0.406272	0.559	0.293	0.000501105
Anapc5	8.57703e-06	0.433627	0.864	0.867	0.000533645
Hnrnpa3	8.76356e-06	0.398971	0.966	0.973	0.000538349
Hist1h2ap	9.28668e-06	1.65145	0.576	0.487	0.000558844
Hnrnpu	9.37274e-06	0.444545	0.932	0.96	0.000558844
Tpm3-rs7	9.47108e-06	0.561534	0.525	0.1	0.000558844
Hspa8	9.55781e-06	0.352816	1	1	0.000558844
Hist3h2ba	9.7961e-06	0.5508	0.508	0.18	0.000560736
Nasp	9.87573e-06	0.662125	0.78	0.773	0.000560736
Ppia	9.93681e-06	0.37462	1	1	0.000560736
Polr2l	1.06637e-05	0.429052	0.593	0.407	0.00058947
Arpc5l	1.06889e-05	0.471522	0.797	0.78	0.00058947
Dolk	1.10903e-05	0.387004	0.525	0.273	0.000604732
Pdgfa	1.19393e-05	-0.48761	0.78	0.92	0.000643793
Elob	1.23257e-05	0.381422	0.983	0.993	0.000657325
Serpinh1	1.27309e-05	0.459569	0.932	0.98	0.000671555
Ppa1	1.39408e-05	0.461989	0.695	0.647	0.000721129
Lamc2	1.39679e-05	0.525685	0.475	0.413	0.000721129
Snrpd3	1.4832e-05	0.401	0.881	0.9	0.000757679
Hmgb1	1.53738e-05	0.505339	0.966	1	0.000777179
Anpep	1.68809e-05	-0.530601	0.458	0.62	0.000844569
mt-Nd2	1.77529e-05	0.200508	1	1	0.000879129
Jun	1.80384e-05	-0.497954	0.678	0.827	0.000883259
Gars	1.82003e-05	0.393155	0.712	0.58	0.000883259
Pdia6	1.87182e-05	0.453584	0.915	0.967	0.000899399
Bzw1	1.9069e-05	0.42055	0.78	0.847	0.000907274
Txn1	2.01053e-05	0.435211	0.949	0.987	0.000947293
Cldn7	2.06921e-05	0.519055	0.915	0.88	0.000965566
Dbi	2.24062e-05	0.492411	0.949	0.987	0.0010356
Hmgb2	2.27853e-05	0.900308	0.881	0.953	0.00104318
Sumo2	2.31014e-05	0.394723	0.983	1	0.00104777
Pkhd1	2.37362e-05	-0.304161	0.492	0.72	0.00106659
Lrrc59	2.56425e-05	0.440077	0.729	0.62	0.00114168
Prmt1	2.67296e-05	0.355812	0.915	0.967	0.00117574
Prdx4	2.6892e-05	0.526165	0.644	0.64	0.00117574
Stip1	2.8773e-05	0.421526	0.881	0.733	0.00124666
Dbp	2.91761e-05	-0.473536	0.169	0.507	0.00124666
Pole4	2.93149e-05	0.411222	0.61	0.487	0.00124666
Gm10036	2.95416e-05	-0.353567	0.322	0.593	0.00124666
H2afy	3.08434e-05	0.413387	0.864	0.92	0.00129037
Zfp664	3.12158e-05	0.400293	0.797	0.633	0.00129479
Sqle	3.15552e-05	0.420735	0.559	0.307	0.00129777
Cyp51	3.30028e-05	0.431842	0.475	0.267	0.00133586
Ppil1	3.30318e-05	0.42731	0.695	0.607	0.00133586
Tmed9	3.41024e-05	0.379398	0.881	0.967	0.00136776
Ndufa5	3.47743e-05	0.456079	0.949	0.953	0.00138327
Odc1	3.5304e-05	0.472932	0.831	0.827	0.00139293
Mrpl3	3.61097e-05	0.387786	0.695	0.567	0.00141323
Exosc7	3.70538e-05	0.414813	0.644	0.6	0.00143042
Rpl35	3.71384e-05	0.346393	0.966	1	0.00143042
Lsm3	3.79229e-05	0.446486	0.746	0.62	0.00144913
Mrfap1	3.87831e-05	0.382112	0.932	0.96	0.00147042
Eif1	4.031e-05	0.31916	1	1	0.00151647
Rpl38	4.22852e-05	0.294127	1	1	0.00157854
Mrps21	4.5307e-05	0.390653	0.915	0.947	0.00167843
Api5	4.56997e-05	0.406708	0.627	0.44	0.00168016
Abcf2	4.8389e-05	0.388371	0.542	0.453	0.00175718
Tmem176a	4.85189e-05	-0.404651	0.797	0.967	0.00175718
Nenf	5.01368e-05	-0.225029	0.712	0.867	0.00180232
Id4	5.11466e-05	-0.595471	0.356	0.567	0.0018184
Ivns1abp	5.13334e-05	-0.308863	0.864	0.987	0.0018184
Msmo1	5.53951e-05	0.529843	0.542	0.267	0.00194806
Abcb8	5.68084e-05	0.362208	0.576	0.367	0.00198339
Abce1	5.94008e-05	0.397418	0.559	0.48	0.00205908
Eprs	6.08348e-05	0.401847	0.932	0.913	0.00209384
Dcakd	6.20835e-05	0.485521	0.576	0.527	0.00211651
Kti12	6.23657e-05	0.35502	0.525	0.313	0.00211651
Nfe2l1	6.5706e-05	-0.322811	0.847	0.953	0.00221438
Dynlt1f	6.65598e-05	0.406399	0.542	0.44	0.00221898
Hells	6.67568e-05	0.793568	0.458	0.247	0.00221898
Ppih	6.9928e-05	0.406272	0.542	0.313	0.00230857
Tubb4b	7.19621e-05	0.792343	0.797	0.82	0.00235968
Calm1	7.34835e-05	0.43913	0.966	0.987	0.00239339
H2afv	7.39847e-05	0.685934	0.814	0.873	0.00239365
Mapkapk2	7.61363e-05	0.364702	0.712	0.54	0.00244695
mt-Nd3	7.71873e-05	0.385957	0.983	1	0.00246441
Ddx39	7.98688e-05	0.455349	0.678	0.627	0.00253336
Nedd8	8.11535e-05	0.378496	0.932	0.98	0.00255739
Tmsb10	8.70819e-05	0.562804	0.966	0.96	0.00271266
Coq5	8.71987e-05	0.353525	0.797	0.553	0.00271266
Anxa11	8.83376e-05	0.318594	0.559	0.367	0.00273059
Psmd8	8.98804e-05	0.365038	0.915	0.947	0.00276069
Akt1	9.12441e-05	0.386554	0.797	0.66	0.00278308
Psmb6	9.17564e-05	0.347062	0.949	0.987	0.00278308
Atpif1	9.94863e-05	-0.135804	0.983	1	0.0029988
Syne2	0.000100329	-0.33971	0.729	0.907	0.00300555
Spc24	0.000109675	0.803886	0.508	0.247	0.00326535
Alad	0.000113386	-0.336663	0.627	0.733	0.00335282
Mrpl20	0.000114564	0.398686	0.864	0.88	0.00335282
Atp5k	0.000114869	0.452143	1	1	0.00335282
Prelid3b	0.000115623	0.422272	0.729	0.627	0.00335282
Vcp	0.000116656	0.35486	0.915	0.96	0.00335282
Sms	0.000116759	0.446781	0.644	0.547	0.00335282
Pih1d1	0.000117449	0.388493	0.644	0.5	0.00335282
Mapre1	0.000121073	0.360579	0.898	0.773	0.00343608
Rad23a	0.000123466	0.375752	0.525	0.347	0.00347987
Lyar	0.00012405	0.473298	0.61	0.56	0.00347987
Gls	0.000128027	-0.399587	0.78	0.853	0.00357079
Cfl1	0.000131816	0.382442	0.932	0.987	0.00364383
Ptbp1	0.000132148	0.396793	0.763	0.753	0.00364383
Efna5	0.000135478	0.425583	0.424	0.24	0.00371455
Umps	0.000140112	0.357257	0.61	0.407	0.00382002
Dnajc15	0.00014287	0.390455	0.881	0.9	0.00387345
Hnrnpdl	0.000153404	0.431278	0.78	0.733	0.00411267
Nceh1	0.000154203	-0.493329	0.542	0.7	0.00411267
mt-Atp8	0.000154855	0.188389	0.966	0.98	0.00411267
Krtcap2	0.000155083	0.384532	0.898	0.913	0.00411267
Srebf2	0.00016002	0.385458	0.542	0.46	0.00422052
Alyref	0.000166293	0.39617	0.746	0.773	0.00436228
Hspe1	0.00017389	0.388696	0.966	1	0.00453702
Asf1a	0.000182453	0.389094	0.644	0.533	0.004735
Tra2b	0.000189255	0.438802	0.814	0.807	0.0048854
Gmps	0.000190971	0.382721	0.831	0.707	0.00490361
Orc6	0.000192704	0.374683	0.458	0.313	0.00492206
Mfge8	0.000194917	0.496911	0.746	0.52	0.00495037
Actl6a	0.000195852	0.411167	0.644	0.607	0.00495037
Uba2	0.000201686	0.370312	0.797	0.74	0.0050714
Tmem258	0.000208307	0.360387	0.949	0.873	0.00521091
Ppp1ca	0.000210461	0.339081	0.966	0.987	0.00523777
Dpy30	0.000212221	0.388054	0.814	0.82	0.00525463
Scd2	0.000229487	0.492057	0.864	0.873	0.00562504
Eif2s1	0.000229769	0.377506	0.797	0.827	0.00562504
Uqcc2	0.000231726	0.418804	0.881	0.92	0.00562504
Fundc2	0.000231817	-0.181468	0.746	0.92	0.00562504
Pomp	0.00024901	0.396328	0.949	0.987	0.00601217
Hnrnpd	0.000252013	0.423523	0.864	0.92	0.00605456
Snrpa	0.000255709	0.375789	0.746	0.767	0.0060806
Rfc2	0.000256138	0.408088	0.593	0.5	0.0060806
Kpnb1	0.000256856	0.416492	0.729	0.627	0.0060806
Ccdc61	0.00026511	0.31766	0.508	0.267	0.00621615
Mcm7	0.000265624	0.521802	0.508	0.427	0.00621615
Epb41	0.000266425	0.399799	0.644	0.553	0.00621615
Tsen34	0.000271373	0.36576	0.763	0.793	0.0063013
Ssr2	0.000273757	0.378939	0.864	0.953	0.0063139
Eftud2	0.000274517	0.346083	0.695	0.473	0.0063139
Zc3h18	0.000279082	0.382033	0.525	0.427	0.00638862
Anp32b	0.000292235	0.460269	0.881	0.973	0.00665829
Mettl16	0.000295961	0.335965	0.644	0.48	0.00669394
Dtymk	0.000296558	0.409533	0.695	0.673	0.00669394
Atox1	0.000301212	0.370765	0.915	0.927	0.00672733
Phgdh	0.000301907	0.498645	0.695	0.647	0.00672733
Upf3a	0.000302196	0.369264	0.695	0.573	0.00672733
Lsm2	0.00030556	0.444046	0.678	0.56	0.00677115
Fubp1	0.000321341	0.375409	0.847	0.873	0.0070885
Rprd1a	0.000327535	0.337279	0.593	0.327	0.00719243
Triobp	0.000338904	0.330922	0.492	0.307	0.00740856
Flnb	0.000341032	0.376917	0.542	0.28	0.00742166
Pycrl	0.00034727	0.343268	0.763	0.573	0.00749309
Cks2	0.000350252	0.65384	0.712	0.647	0.00749309
0610040J01Rik	0.00035077	0.437155	0.61	0.493	0.00749309
Atp5e	0.000351423	0.383327	1	1	0.00749309
Psmc5	0.000353965	0.349402	0.932	0.947	0.00749309
Thrap3	0.000354482	0.40985	0.831	0.773	0.00749309
Bub3	0.000355123	0.45875	0.746	0.607	0.00749309
Cox7a2l	0.000357692	-0.101481	0.932	1	0.00751462
Ssb	0.000388752	0.337304	0.932	0.973	0.00813196
Phldb2	0.000392255	-0.24195	0.763	0.9	0.00817001
Hmgb3	0.000421401	0.482849	0.729	0.687	0.00872199
Cbx1	0.000422351	0.424574	0.915	0.953	0.00872199
Eci1	0.000428381	-0.20989	0.678	0.893	0.00880903
Aes	0.000431007	0.318921	0.983	1	0.00882564
Psmd12	0.000447942	0.34784	0.847	0.88	0.00909942
Mettl1	0.000448127	0.360178	0.407	0.353	0.00909942
Atraid	0.000456657	-0.253748	0.627	0.853	0.00921002
Taf1d	0.00045737	0.398588	0.78	0.7	0.00921002
Psma7	0.000468268	0.365877	0.949	0.993	0.00939052
Gatad1	0.000475799	0.360467	0.763	0.72	0.00950228
Dek	0.000480971	0.575174	0.932	0.92	0.0095662
Rfc3	0.000497911	0.410344	0.475	0.433	0.0098627
Ube2m	0.000501415	0.358232	0.915	0.947	0.00989173
Cdv3	0.000507148	0.361648	0.864	0.867	0.00996433
Mrps12	0.000518822	0.369442	0.763	0.733	0.0101526
Ephb3	0.000529635	0.514388	0.542	0.353	0.0103226
Eva1a	0.000542254	-0.4027	0.831	0.92	0.0105262
Nfat5	0.00054788	-0.370082	0.593	0.753	0.0105931
Gart	0.00055425	0.35058	0.576	0.467	0.0106737
Srpk1	0.000564712	0.424225	0.712	0.66	0.0108322
Mcm6	0.000570312	0.448106	0.441	0.34	0.0108649
Cebpg	0.000571906	0.332782	0.559	0.467	0.0108649
Terf2ip	0.000573134	0.297659	0.508	0.287	0.0108649
D8Ertd738e	0.000586598	0.358627	0.915	0.94	0.0110366
Hmgcs1	0.000586738	0.387225	0.881	0.793	0.0110366
Htra2	0.000590079	0.317912	0.576	0.353	0.0110448
Mrps18c	0.000591728	0.354517	0.712	0.673	0.0110448
Tipin	0.000598471	0.365114	0.542	0.367	0.0111279
Fth1	0.000610201	0.285346	1	1	0.0113027
Tcof1	0.000624142	0.352691	0.475	0.387	0.011517
Tmem147	0.000642682	0.348585	0.847	0.9	0.0118141
Rpl7a	0.000656249	0.248436	1	1	0.012018
Fam168b	0.000662679	0.313453	0.593	0.373	0.0120902
Maged1	0.000671498	0.333041	0.881	0.88	0.0121792
Rpl36	0.000672577	0.258028	1	1	0.0121792
Mrps25	0.000679892	0.339788	0.847	0.827	0.0122659
Eny2	0.000687341	0.362671	0.847	0.867	0.0123391
Sf1	0.000689037	0.336489	0.61	0.56	0.0123391
Prdx1	0.000698764	0.403998	0.966	0.993	0.0124673
Psme2	0.000704007	0.32206	0.881	0.733	0.0125148
Hdac2	0.000707102	0.334808	0.831	0.68	0.012524
Nhp2	0.00072319	0.387871	0.695	0.673	0.0127623
Psmd6	0.000726347	0.333683	0.814	0.873	0.0127716
Cdca8	0.000766118	0.707488	0.458	0.167	0.0134223
Sf3b4	0.000777537	0.312976	0.695	0.48	0.0135733
Dad1	0.000784857	0.307948	0.932	0.967	0.013652
Tcf3	0.000796701	0.385905	0.593	0.493	0.0138085
Hirip3	0.000812143	0.465581	0.492	0.293	0.0139414
Krt8	0.000812334	0.407719	0.881	0.813	0.0139414
Dynll2	0.000812984	0.407918	0.831	0.727	0.0139414
Sfxn2	0.000819836	0.29306	0.644	0.5	0.0140094
Hnrnpk	0.000828524	0.324646	0.966	0.993	0.0140725
Nxt1	0.000831617	0.336024	0.508	0.42	0.0140725
Kdelr2	0.000832229	0.331595	0.576	0.66	0.0140725
Gas1	0.00084343	-0.427694	0.576	0.68	0.0141478
Txn2	0.000844728	0.382583	0.915	0.953	0.0141478
2010107E04Rik	0.000846478	0.32398	0.966	0.993	0.0141478
Hsp90b1	0.000848345	0.320574	0.983	0.98	0.0141478
Glrx5	0.000855711	0.421376	0.932	0.933	0.0142218
Ier5l	0.000860666	-0.319665	0.559	0.713	0.0142553
Fam92a	0.000877118	0.350702	0.695	0.64	0.0144784
Adamts1	0.000881398	-0.479445	0.271	0.473	0.0144997
Ncbp1	0.000888137	0.309544	0.576	0.36	0.0145613
Wars	0.000913796	0.306326	0.475	0.293	0.0149082
Col4a3bp	0.000916696	-0.325216	0.22	0.467	0.0149082
Tomm5	0.000918515	0.406129	0.831	0.86	0.0149082
Snrnp40	0.000926638	0.349043	0.661	0.633	0.0149899
Rad23b	0.000931971	0.367464	0.729	0.713	0.0150261
Mgst1	0.000945834	-0.319082	0.881	0.987	0.0151681
Nbea	0.000947029	-0.250311	0.39	0.607	0.0151681
Nae1	0.000952999	0.320251	0.695	0.66	0.0152135
Pnkd	0.000962347	0.318422	0.932	0.887	0.0153124
Pebp1	0.000969629	0.271934	1	1	0.0153638
Cdkn1b	0.00097201	-0.28267	0.508	0.693	0.0153638
Capzb	0.000975075	0.337238	0.847	0.873	0.0153638
Prorsd1	0.000995914	0.308694	0.729	0.527	0.0156413
Phb	0.0010058	0.327403	0.949	0.927	0.0157457
Chd4	0.00101393	0.418895	0.864	0.88	0.0158219
Clns1a	0.00102569	0.335555	0.661	0.58	0.015954
Igfbp4	0.00104053	0.59527	0.678	0.613	0.0161332
Itpa	0.00105533	0.352746	0.593	0.487	0.0163106
Nabp2	0.00108358	0.324921	0.695	0.66	0.0166634
Lsm1	0.00108846	0.323832	0.695	0.64	0.0166634
Tars	0.00108927	0.312271	0.525	0.387	0.0166634
Tapbp	0.00109457	-0.278982	0.237	0.56	0.0166634
Ublcp1	0.00109681	0.311695	0.525	0.42	0.0166634
Nav2	0.00109876	0.393155	0.61	0.5	0.0166634
H2afx	0.00110836	0.579368	0.644	0.54	0.0167565
Pdap1	0.00112952	0.379001	0.881	0.967	0.0169427
Ube3c	0.00112987	0.32485	0.542	0.393	0.0169427
Cox19	0.00113329	0.324988	0.746	0.627	0.0169427
Ccar1	0.00113463	0.37693	0.814	0.84	0.0169427
Metap2	0.00115997	0.288646	0.915	0.953	0.0172678
Ndufa12	0.0011941	0.330745	0.983	0.987	0.0177216
Rcn3	0.00121896	0.384151	0.525	0.467	0.0180353
Trnt1	0.00123858	0.347437	0.644	0.513	0.01827
Nelfcd	0.00125321	0.326279	0.508	0.427	0.0184297
Ywhab	0.00125867	0.34223	0.898	0.88	0.0184542
2610524H06Rik	0.00126558	0.347992	0.593	0.56	0.0184947
Dynlt3	0.00126906	-0.209	0.559	0.78	0.0184947
Ssrp1	0.00128149	0.432323	0.746	0.847	0.0186199
Vmp1	0.00130348	0.357734	0.695	0.753	0.018883
Echs1	0.00130938	0.294661	0.932	0.92	0.018912
Psmb10	0.00131614	0.341487	0.644	0.473	0.0189532
Dcdc2a	0.00132017	-0.324579	0.729	0.84	0.018955
Flna	0.00133477	0.484756	0.525	0.427	0.0191081
Rwdd1	0.00136421	0.33447	0.831	0.867	0.0194721
Tfrc	0.00139026	0.329861	0.492	0.493	0.0197857
Slco3a1	0.00140993	0.407347	0.492	0.3	0.020007
Bysl	0.00142243	0.322723	0.441	0.253	0.0201255
Ddx6	0.00143224	0.337214	0.763	0.66	0.0202053
Snrpc	0.00143883	0.343783	0.678	0.747	0.0202085
1810058I24Rik	0.00144079	0.315849	0.814	0.887	0.0202085
Fscn1	0.00145363	0.370404	0.441	0.32	0.0203299
Snhg18	0.00146392	-0.210365	0.695	0.887	0.020415
As3mt	0.00147641	0.283436	0.712	0.453	0.0205301
Pmvk	0.00149151	0.307129	0.678	0.607	0.0206809
Dnajc2	0.00150292	0.363507	0.695	0.72	0.0207796
Abhd11	0.00151884	-0.214785	0.576	0.773	0.0209401
mt-Co1	0.00154249	0.213353	1	1	0.0212059
Ap2m1	0.0015606	0.32271	0.949	0.893	0.0213943
Ezr	0.00156905	-0.177657	0.983	1	0.0213995
Lmnb1	0.0015698	0.433604	0.542	0.573	0.0213995
Mal2	0.00157833	0.319993	0.458	0.313	0.0214482
Bnip3l	0.00158513	-0.134651	0.847	0.927	0.0214482
Lockd	0.00158662	0.619707	0.288	0.22	0.0214482
Asap1	0.00160265	0.322583	0.542	0.46	0.0216047
Naga	0.00163672	-0.375755	0.441	0.533	0.0219758
Kctd6	0.00164181	-0.262012	0.356	0.58	0.0219758
Eif4a2	0.00164377	-0.213777	0.814	0.987	0.0219758
Arl6ip6	0.00167446	0.302471	0.576	0.467	0.0223246
Rnf168	0.00169534	0.319993	0.458	0.34	0.0225098
Kcnj1	0.00170075	0.476008	0.678	0.473	0.0225098
Ddost	0.00170227	0.351395	0.847	0.907	0.0225098
Stk32b	0.00174048	-0.281925	0.441	0.62	0.0229525
Serpinf1	0.00176401	0.40503	0.407	0.193	0.0231998
Slc35b1	0.00178138	0.302586	0.627	0.48	0.0233649
Glud1	0.00178948	-0.201807	0.932	0.987	0.0233851
Rps27l	0.00179255	0.311547	0.915	0.98	0.0233851
Prmt5	0.00180051	0.363472	0.492	0.433	0.023426
Aven	0.00182682	0.264048	0.508	0.3	0.0237047
Cox7c	0.0018346	0.270689	1	1	0.0237422
Eif3g	0.00184293	0.316912	0.864	0.827	0.0237866
Usp1	0.0018544	0.492082	0.475	0.387	0.0238711
Ywhaq	0.00187857	0.321815	0.966	0.993	0.0240722
Commd1	0.00187994	0.331952	0.898	0.887	0.0240722
Syncrip	0.00189856	0.369506	0.78	0.74	0.0242289
Klf9	0.00190574	-0.309341	0.458	0.707	0.0242289
Sf3b5	0.00190716	0.369872	0.746	0.793	0.0242289
Tmem167	0.00191865	0.32445	0.746	0.773	0.0243113
Tmem161a	0.00193248	0.284402	0.525	0.34	0.0244227
Ybx3	0.00193862	0.336668	0.78	0.78	0.0244367
Brd3	0.00195054	0.344333	0.763	0.74	0.0245233
Htatsf1	0.00195693	0.366702	0.678	0.587	0.02454
Smdt1	0.00197239	0.341285	0.949	0.98	0.0246036
Itm2b	0.00197337	-0.249121	0.983	1	0.0246036
Pou3f3	0.00197721	-0.236859	0.831	0.907	0.0246036
Tmem135	0.00198931	0.247856	0.593	0.44	0.0246404
Stard4	0.00199032	0.371064	0.424	0.26	0.0246404
Pcmtd1	0.00201027	-0.264887	0.525	0.773	0.024824
Clybl	0.00202245	-0.219582	0.593	0.74	0.0249068
Tomm40	0.00202724	0.372515	0.847	0.933	0.0249068
Smc2	0.00204335	0.825556	0.475	0.273	0.0250174
Set	0.00204758	0.380818	0.932	0.987	0.0250174
Mthfd2	0.0020517	0.553608	0.39	0.18	0.0250174
Selenos	0.00206921	0.317912	0.831	0.793	0.0251677
Tex261	0.00210334	0.320423	0.746	0.66	0.025515
Fhod3	0.00210828	-0.258389	0.661	0.753	0.025515
Tmem256	0.00212111	0.335815	0.847	0.88	0.0255238
Rbm42	0.00212345	0.320232	0.644	0.573	0.0255238
Mphosph10	0.00212479	0.298882	0.661	0.547	0.0255238
Ndufb7	0.0021825	0.278876	1	0.973	0.0261523
Exosc9	0.00220772	0.24934	0.508	0.327	0.0262987
Wdr83os	0.00220843	0.316626	0.763	0.733	0.0262987
Rbm14	0.00221097	0.315458	0.441	0.273	0.0262987
Clcn3	0.00222404	-0.230053	0.644	0.787	0.0263894
Wdr5	0.00223594	0.307609	0.424	0.273	0.0264658
Sfpq	0.00226133	0.382884	0.898	0.9	0.0267014
Ccnd3	0.00226695	0.323017	0.847	0.7	0.0267026
Pfn1	0.00228729	0.37111	0.915	1	0.026821
Pfdn4	0.00228805	0.318175	0.746	0.747	0.026821
Col4a1	0.00236506	0.310297	0.915	0.887	0.0276569
Eif3b	0.00238692	0.38412	0.695	0.7	0.0278455
Naa50	0.00240294	0.35991	0.729	0.713	0.0279652
Nars	0.00241817	0.304983	0.864	0.807	0.0280751
Tmpo	0.00242762	0.477942	0.729	0.6	0.0281175
1110008F13Rik	0.0024486	0.369344	0.881	0.907	0.0282399
Mpzl2	0.00245061	-0.202168	0.542	0.76	0.0282399
Sec13	0.00246145	0.304489	0.729	0.613	0.0282399
Ppie	0.00246147	0.295301	0.525	0.42	0.0282399
Lsm5	0.0024914	0.36184	0.61	0.6	0.028516
Rfc5	0.00250377	0.40299	0.458	0.187	0.0285465
Surf4	0.00250583	0.347641	0.763	0.633	0.0285465
Ipo7	0.00252106	0.322757	0.61	0.507	0.0286377
Dynll1	0.00252564	0.342483	0.983	0.993	0.0286377
Ctsd	0.00255142	0.304983	0.932	0.96	0.0288626
Ddx21	0.00256955	0.350813	0.644	0.487	0.0290001
Limd2	0.0026016	0.392713	0.373	0.24	0.0292936
Acly	0.00261307	0.287842	0.576	0.467	0.0293491
Slc50a1	0.00262289	-0.203357	0.542	0.707	0.0293491
Pabpc4	0.00262466	0.304489	0.559	0.42	0.0293491
Ssbp3	0.00268295	0.401752	0.542	0.487	0.0299213
Nxn	0.00268817	0.313453	0.508	0.407	0.0299213
2010111I01Rik	0.00269503	0.332633	0.746	0.72	0.0299291
Stub1	0.00271302	0.34801	0.898	0.927	0.0299671
Lama5	0.00271646	0.405988	0.475	0.3	0.0299671
Hist1h1b	0.00271699	0.991541	0.305	0.18	0.0299671
Mcm2	0.00273358	0.423672	0.407	0.373	0.0300257
Rfc1	0.00273467	0.376181	0.661	0.687	0.0300257
Utrn	0.00275737	-0.248896	0.627	0.773	0.0302065
Sar1a	0.00276403	0.275457	0.678	0.587	0.0302113
Snrpe	0.00278795	0.340084	0.831	0.94	0.0303859
Smc4	0.00279252	0.652878	0.627	0.513	0.0303859
Hmgcr	0.00282521	0.340034	0.61	0.433	0.0306728
Sec11a	0.00283292	0.33738	0.78	0.873	0.0306879
Mul1	0.00283981	0.282842	0.508	0.467	0.030694
Gmnn	0.0028617	0.476157	0.542	0.433	0.0308619
Rac1	0.00287884	0.33197	0.746	0.827	0.0309778
Ptov1	0.00289971	0.30714	0.932	0.967	0.031066
Rida	0.00289984	-0.159974	0.695	0.847	0.031066
Lage3	0.00294534	0.328032	0.78	0.8	0.031484
Minos1	0.00295831	0.317258	1	0.98	0.0315161
Topbp1	0.00296134	0.412068	0.373	0.22	0.0315161
Rbbp8	0.00299837	0.29904	0.475	0.353	0.0318405
Psma4	0.00302714	0.30348	0.949	0.967	0.0320408
Wdr77	0.00303044	0.295166	0.458	0.36	0.0320408
Serbp1	0.00305836	0.311505	0.983	0.993	0.032255
Snrpa1	0.003064	0.38399	0.644	0.653	0.032255
Ltv1	0.00310178	0.299513	0.593	0.52	0.0325822
Oaz1	0.00311086	0.34159	0.966	1	0.0326069
Usp7	0.00317868	0.328453	0.661	0.66	0.0330836
Bsnd	0.00318671	0.386196	0.508	0.333	0.0330836
Cacybp	0.0031901	0.320286	0.847	0.853	0.0330836
Hspd1	0.00319045	0.283622	0.983	1	0.0330836
Hdgf	0.00320011	0.343822	0.898	0.94	0.0330836
H2-K1	0.00320275	-0.366185	0.424	0.647	0.0330836
Cthrc1	0.00320406	-0.493363	0.339	0.533	0.0330836
Eif4g2	0.00321643	0.310155	0.949	0.973	0.0331408
Cenpf	0.00325413	0.933098	0.441	0.147	0.0334583
Pdpn	0.00326502	0.350374	0.373	0.233	0.0334733
Tspan13	0.00326939	0.335799	0.661	0.607	0.0334733
Ywhaz	0.00328282	0.332552	0.915	0.947	0.0334836
Gcnt2	0.00329502	-0.283297	0.305	0.54	0.0334836
Dync1i2	0.0033036	-0.132052	0.847	0.92	0.0334836
Spon1	0.00330427	0.60327	0.305	0.233	0.0334836
Psmc3	0.00330489	0.298244	0.898	0.967	0.0334836
Cenpx	0.00335029	0.380024	0.763	0.747	0.03381
Psmb4	0.00335104	0.301913	0.932	0.96	0.03381
Gata3	0.00341641	0.720923	0.305	0.18	0.0343774
Ccnd1	0.00342145	0.689855	0.797	0.8	0.0343774
Csrp2	0.00346947	0.425284	0.78	0.567	0.0347879
Kdm6b	0.00351014	-0.221152	0.508	0.68	0.0351158
Smarcb1	0.00351665	0.350493	0.831	0.813	0.0351158
Luc7l3	0.00355884	0.31509	0.847	0.853	0.0354567
Trim35	0.00356539	0.312976	0.508	0.487	0.0354567
Ube2d1	0.0035955	0.27199	0.458	0.367	0.0356404
Impad1	0.00359856	0.332502	0.695	0.62	0.0356404
Mccc1	0.00362389	0.266219	0.559	0.427	0.0358182
Mfn2	0.00364242	0.198374	0.492	0.36	0.0359281
Rnps1	0.00365089	0.34367	0.678	0.673	0.0359387
Gcn1l1	0.00366153	0.294018	0.644	0.527	0.0359704
Mfap2	0.00367594	0.419152	0.39	0.233	0.036039
Impdh2	0.00370319	0.417023	0.678	0.653	0.036233
Timm50	0.00371742	0.295301	0.797	0.64	0.036299
Rnf4	0.00372954	0.349952	0.593	0.507	0.0363443
Ssr1	0.00376402	0.309343	0.678	0.673	0.0366068
Pclaf	0.00377859	1.09081	0.424	0.127	0.036675
Smim14	0.00378729	-0.23189	0.407	0.68	0.0366861
Rcc1	0.00379713	0.283436	0.407	0.18	0.0367081
Smim27	0.00384275	0.283247	0.508	0.387	0.0370608
Sumo3	0.00384889	0.301622	0.814	0.7	0.0370608
Ruvbl1	0.00387381	0.329396	0.61	0.56	0.0371901
Selenof	0.00388061	0.27007	0.915	0.967	0.0371901
Cstf2	0.0038853	0.285621	0.424	0.327	0.0371901
Spsb4	0.00390753	0.375682	0.441	0.353	0.0373292
Rbmxl1	0.00392091	0.348941	0.644	0.6	0.0373834
Rpn2	0.00396856	0.344936	0.78	0.827	0.0377636
Psma6	0.00397938	0.29419	0.847	0.88	0.0377924
Efemp2	0.00401433	0.278172	0.508	0.333	0.0380499
Ccnb2	0.00402963	0.698781	0.407	0.167	0.0381205
Lrpprc	0.00403853	0.287055	0.678	0.52	0.0381303
Lman2l	0.00406287	0.253937	0.542	0.287	0.0382857
Dnaja1	0.00410772	0.307635	0.915	0.98	0.0385954
Nop56	0.00411165	0.352624	0.78	0.713	0.0385954
G3bp1	0.00413318	0.348819	0.763	0.96	0.0386396
Bnip3	0.00413897	-0.215347	0.627	0.767	0.0386396
Msh3	0.00414024	0.302864	0.458	0.393	0.0386396
Hnrnpc	0.00416265	0.31636	0.881	0.92	0.0387742
Chst8	0.00420756	-0.312118	0.373	0.527	0.0391017
Cops3	0.00421913	0.340034	0.729	0.747	0.0391017
Rangap1	0.00422198	0.510465	0.39	0.347	0.0391017
Fjx1	0.00423375	0.409243	0.39	0.253	0.0391309
Anp32e	0.00424617	0.333867	0.746	0.76	0.0391309
Tspo	0.00424933	0.30831	0.898	0.953	0.0391309
Got2	0.00428481	0.27893	0.932	0.927	0.0393508
Fbn2	0.00428942	0.399987	0.373	0.32	0.0393508
Agpat2	0.00429926	0.297109	0.525	0.447	0.0393666
Mme	0.0043101	-0.259446	0.475	0.767	0.0393916
Tbca	0.00438249	0.294772	0.898	0.967	0.039947
Adsl	0.00438734	0.283753	0.644	0.5	0.039947
Chtop	0.00443262	0.295831	0.712	0.673	0.0402838
Ssna1	0.00444955	0.304158	0.746	0.667	0.040362
Tmem37	0.00449583	0.345311	0.525	0.353	0.0407057
Aldh1a2	0.00452299	-0.358071	0.475	0.64	0.040804
Srm	0.0045235	0.366556	0.661	0.527	0.040804
Praf2	0.00454541	0.239951	0.525	0.333	0.0409049
Gcat	0.00455791	0.350177	0.678	0.653	0.0409049
Pou2f1	0.00455998	0.347196	0.424	0.28	0.0409049
U2af2	0.00459323	0.321041	0.746	0.7	0.0410516
Trappc6a	0.00459325	-0.115947	0.644	0.873	0.0410516
Mettl9	0.00465396	0.270475	0.881	0.887	0.0415178
Uggt1	0.0046712	0.276027	0.576	0.427	0.0415417
Ube2c	0.00467791	0.916903	0.356	0.253	0.0415417
Bag2	0.00468984	-0.231112	0.644	0.767	0.0415417
Tamm41	0.00469088	0.30313	0.407	0.207	0.0415417
C1qbp	0.00470774	0.329807	0.949	0.973	0.0416151
Atg4d	0.00473637	0.272839	0.695	0.593	0.0416994
Snhg20	0.00473799	0.313604	0.661	0.573	0.0416994
Swi5	0.00474691	0.319993	0.932	0.947	0.0416994
Sox4	0.00476668	-0.165514	0.746	0.873	0.0416994
Mpi	0.00476829	0.250207	0.39	0.253	0.0416994
Xrcc1	0.00477059	0.284402	0.627	0.48	0.0416994
Cul7	0.00477742	0.316771	0.525	0.433	0.0416994
Gga1	0.00479394	0.27785	0.475	0.413	0.0417684
Klhl2	0.00482333	0.321296	0.39	0.173	0.0419412
F11r	0.00483105	0.303773	0.712	0.653	0.0419412
Idi1	0.00486771	0.299849	0.525	0.313	0.0421839
Wfdc15b	0.00490734	-0.325917	0.814	0.947	0.0423471
Hspbp1	0.00491737	0.266619	0.525	0.42	0.0423471
Polr3k	0.00494139	0.297109	0.644	0.573	0.0423471
Card19	0.00494689	0.2569	0.525	0.393	0.0423471
Epha4	0.00495567	0.417838	0.39	0.24	0.0423471
Bnip2	0.00495847	0.276318	0.627	0.507	0.0423471
Slc25a4	0.00496497	0.205469	1	1	0.0423471
Psmc1	0.00496583	0.317476	0.78	0.713	0.0423471
Npm3	0.00497117	0.338233	0.678	0.66	0.0423471
Glmp	0.0049738	-0.15133	0.61	0.78	0.0423471
AC160336.1	0.00498927	0.642894	0.627	0.653	0.0424044
Gmppa	0.0050035	0.276615	0.492	0.433	0.042451
Dhx15	0.00502386	0.385458	0.729	0.747	0.0424923
Tmem14c	0.00502588	0.274751	0.898	0.827	0.0424923
Wbp2	0.00505722	-0.175061	0.559	0.72	0.0426829
Htt	0.00509957	0.278051	0.407	0.3	0.0429089
Slit2	0.00510167	0.396111	0.576	0.387	0.0429089
Mast4	0.00511093	-0.240017	0.559	0.747	0.0429123
Gar1	0.00513473	0.302128	0.542	0.447	0.0429936
Mcm3	0.00513832	0.527633	0.356	0.173	0.0429936
Psmb3	0.00514825	0.314649	0.898	0.98	0.0430025
Psip1	0.00517951	0.427062	0.712	0.76	0.0431176
Rif1	0.00517987	0.339891	0.593	0.593	0.0431176
Haus7	0.00518869	0.249429	0.441	0.3	0.0431176
Fam160a2	0.0052016	0.292873	0.39	0.187	0.043151
Arf6	0.00523657	0.248919	0.492	0.367	0.043367
Clic4	0.00527228	-0.302374	0.441	0.593	0.0435771
Tmem160	0.00527989	-0.159	0.678	0.8	0.0435771
Plin2	0.00531857	-0.236973	0.508	0.647	0.0438218
Bex1	0.00535623	0.534295	0.559	0.6	0.0440573
Ly6e	0.00540699	-0.20089	0.814	0.88	0.0443996
Prkar2a	0.00542597	0.287492	0.559	0.493	0.0444801
Atp5g1	0.00544427	0.335733	1	1	0.0445326
Gstp1	0.00545073	0.332324	0.593	0.593	0.0445326
Taf10	0.0054705	0.293276	0.881	0.873	0.044619
Pold2	0.00549546	0.283626	0.475	0.353	0.0447474
Metrn	0.0055441	0.277691	0.441	0.287	0.0450679
Manf	0.00561383	0.342	0.831	0.847	0.0455584
Coprs	0.00565837	0.314059	0.542	0.5	0.045831
Dkc1	0.0056663	0.323452	0.678	0.613	0.045831
Son	0.00571021	0.312017	0.932	0.987	0.0461092
Add3	0.00574971	-0.249856	0.508	0.66	0.0463445
Ptprs	0.00576582	0.308471	0.593	0.48	0.0463445
Uqcr11	0.005768	0.322979	1	1	0.0463445
Apoo	0.00579043	0.263331	0.864	0.773	0.0464478
Fam69b	0.00582514	0.259244	0.644	0.487	0.0466492
Dlst	0.00585285	0.226579	0.881	0.8	0.0467301
Lbr	0.00585451	0.358341	0.424	0.153	0.0467301
Rogdi	0.00587613	0.322537	0.661	0.513	0.0468257
2410131K14Rik	0.00590564	0.235012	0.492	0.3	0.0468855
Tmem176b	0.0059099	-0.209328	0.932	0.987	0.0468855
Ccdc141	0.00591361	-0.283867	0.508	0.7	0.0468855
Rnf187	0.00592227	0.318845	0.847	0.86	0.0468855
Hdgfl2	0.00593931	0.276318	0.627	0.547	0.0469437
Actr1a	0.00595134	0.260828	0.61	0.413	0.0469624
Nkiras2	0.00599902	0.239951	0.593	0.42	0.0472617
Mia3	0.00604259	0.266824	0.559	0.447	0.0475279
Impa2	0.00605831	0.333395	0.847	0.693	0.0475744
Pcbd1	0.00609117	0.227681	0.915	0.933	0.0477552
Ddx5	0.00615508	0.290437	0.949	1	0.0481784
Cd63	0.00617354	-0.212277	0.966	1	0.0482451
Pnmal2	0.0063098	-0.279587	0.271	0.473	0.0491699
Bspry	0.00631215	0.294285	0.39	0.247	0.0491699
Ppp4r1	0.00639388	0.254069	0.475	0.327	0.049653
Pi4k2a	0.00639463	0.264243	0.542	0.407	0.049653
Ndufaf4	0.00642161	0.326962	0.712	0.64	0.0497202
Mcrip2	0.00642377	0.375724	0.831	0.787	0.0497202
Bola3	0.00650507	0.401506	0.814	0.76	0.0502693
Cenpa	0.00654692	0.646821	0.458	0.173	0.0505123
Edf1	0.0065619	0.297408	0.966	0.973	0.0505475
Tomm7	0.00665012	0.312485	0.932	0.967	0.0511458
Farsb	0.006679	0.257222	0.593	0.607	0.0512867
Qser1	0.00669358	0.286471	0.441	0.38	0.0513174
Trip12	0.00670457	0.268938	0.78	0.567	0.0513206
Klhl24	0.00672909	-0.197775	0.508	0.66	0.0514272
Sec61b	0.00674023	0.339232	0.898	0.987	0.0514314
Psma2	0.00677108	0.274797	0.915	0.933	0.0515857
2022-09-11	0.00681119	0.353048	0.661	0.48	0.0518099
Magohb	0.00682692	0.25765	0.441	0.36	0.0518482
Fkbp1a	0.00684266	0.274338	0.915	0.88	0.0518866
Gak	0.00693536	0.239951	0.441	0.287	0.0524704
Gtf2a2	0.00694244	0.283686	0.78	0.78	0.0524704
Pam	0.00695208	-0.362578	0.424	0.54	0.0524704
Gdi2	0.00697303	0.293741	0.847	0.913	0.0525468
Brpf1	0.0069867	0.302471	0.39	0.207	0.0525681
Mettl6	0.00700751	0.230289	0.424	0.3	0.0525857
Pmf1	0.0070107	0.357287	0.424	0.467	0.0525857
Srsf1	0.00705505	0.321924	0.763	0.74	0.0528085
Luzp1	0.00706218	0.258731	0.831	0.693	0.0528085
Arhgap24	0.00707807	-0.172226	0.661	0.867	0.052846
Ss18l2	0.00711853	0.261457	0.763	0.667	0.0530664
Cdh3	0.0071413	0.325473	0.458	0.293	0.0531545
Gigyf2	0.00719572	-0.116023	0.763	0.78	0.0534775
Mid1ip1	0.00720705	0.220148	0.475	0.253	0.0534798
Pcdh8	0.00722953	-0.658796	0.102	0.26	0.0535648
Llph	0.00724838	0.287666	0.78	0.86	0.0536225
Bop1	0.0072689	0.286908	0.475	0.287	0.0536925
Nme4	0.00731938	-0.373644	0.254	0.44	0.0539832
Mrpl52	0.00736325	0.295199	0.898	0.907	0.0542243
Supt16	0.00739862	0.308184	0.729	0.78	0.0544023
4833439L19Rik	0.00746347	0.287453	0.729	0.647	0.0547383
Uba3	0.00746846	0.248249	0.508	0.44	0.0547383
H2afy2	0.00747815	0.322948	0.424	0.253	0.0547383
Srsf6	0.00756546	0.328934	0.78	0.847	0.0552939
Pfdn1	0.00759176	0.261508	0.881	0.953	0.0553829
Oard1	0.00762047	0.275542	0.627	0.507	0.0553829
Mzt1	0.00762395	0.251927	0.559	0.48	0.0553829
Litaf	0.00763431	-0.198901	0.492	0.587	0.0553829
Dohh	0.00763469	0.275611	0.661	0.58	0.0553829
Itga6	0.00766159	-0.216628	0.864	0.953	0.055443
Sdf2l1	0.00766582	0.277338	0.458	0.32	0.055443
Cnot2	0.00769739	0.27827	0.593	0.5	0.0555885
Grpel1	0.00776319	0.302596	0.881	0.92	0.055799
Cog5	0.00777186	0.250001	0.441	0.267	0.055799
Romo1	0.00777501	0.300113	0.949	0.993	0.055799
Dock1	0.00777523	-0.242347	0.356	0.553	0.055799
Nipsnap2	0.00779106	0.250976	0.831	0.733	0.055799
Mob1b	0.00779553	0.231918	0.525	0.413	0.055799
Fbxo30	0.0078344	0.26057	0.407	0.233	0.0559946
Ostc	0.0079283	0.291063	0.847	0.813	0.0565824
Commd2	0.00797832	0.272957	0.627	0.56	0.0568072
Dapk1	0.00798321	-0.116997	0.593	0.82	0.0568072
Bex4	0.00800495	0.366332	0.627	0.6	0.0568785
Mum1	0.0080204	0.265926	0.424	0.373	0.056905
Pbx2	0.00807917	0.25365	0.627	0.527	0.0572383
Rragd	0.00811249	-0.237456	0.593	0.76	0.0572936
Vat1	0.00811434	-0.195612	0.576	0.613	0.0572936
Ephb4	0.00812239	0.25847	0.458	0.327	0.0572936
Gxylt1	0.00819184	0.280773	0.492	0.373	0.0576085
Nop53	0.00821898	-0.102024	0.814	0.867	0.0576085
Apbb2	0.00821942	0.285697	0.492	0.327	0.0576085
Churc1	0.00822373	-0.147431	0.797	0.893	0.0576085
Ppp1r9a	0.0082264	-0.195637	0.373	0.567	0.0576085
AY036118	0.00826932	-0.583726	0.915	0.973	0.0578257
Uqcrq	0.00829907	0.309464	1	0.973	0.0579502
Nsmce2	0.00832846	0.277821	0.593	0.54	0.0580589
Emg1	0.00833856	0.275457	0.797	0.773	0.0580589
Mrps28	0.00836541	0.27654	0.61	0.56	0.0581624
Tnrc6c	0.00837951	0.270722	0.797	0.62	0.0581771
Pcbp4	0.00842409	0.294345	0.644	0.6	0.0583315
Nbr1	0.00842673	-0.256486	0.39	0.547	0.0583315
Scaf4	0.00843782	0.249707	0.475	0.273	0.0583315
Rpn1	0.00847103	0.325606	0.763	0.893	0.0584778
Emc8	0.00849607	0.312341	0.627	0.673	0.0585594
Lsm7	0.00850698	0.305465	0.712	0.653	0.0585594
Rpl27	0.00880774	0.286572	0.915	0.953	0.0605117
Hnrnpul1	0.00882738	0.30487	0.678	0.613	0.0605117
Efhd1	0.008828	-0.311607	0.542	0.747	0.0605117
Ube2s	0.00885894	0.523215	0.814	0.913	0.0605833
Gucd1	0.00889548	0.265015	0.407	0.22	0.0605833
U2surp	0.00890141	0.311828	0.814	0.827	0.0605833
Lrp6	0.00890623	-0.11975	0.797	0.827	0.0605833
Bak1	0.00891084	0.262256	0.525	0.48	0.0605833
Nabp1	0.00891335	-0.354284	0.508	0.613	0.0605833
Spsb3	0.00895018	0.212042	0.525	0.367	0.06073
Ifngr1	0.00896365	0.266619	0.424	0.187	0.06073
Pkig	0.00897247	0.278233	0.797	0.78	0.06073
Carnmt1	0.00898602	0.278936	0.661	0.62	0.060737
Arf5	0.00900349	0.291038	0.915	0.987	0.0607704
Gcsh	0.00902348	0.357349	0.78	0.78	0.0608207
Furin	0.00909324	0.272895	0.424	0.273	0.061206
Ctnnb1	0.0091904	0.356693	0.898	0.967	0.0617743
Arl2bp	0.00921561	0.284974	0.678	0.507	0.061858
Idh3g	0.00941501	0.235574	0.915	0.907	0.0631092
Smarcd3	0.00944162	0.248919	0.475	0.36	0.0631615
Tceal8	0.00944885	0.253556	0.763	0.773	0.0631615
Parp1	0.00950776	0.324988	0.627	0.58	0.0634679
Rbm10	0.00952695	0.254444	0.644	0.447	0.0635086
Myo10	0.00957365	-0.289531	0.61	0.747	0.0637164
Prpf31	0.00958438	0.270028	0.559	0.48	0.0637164
Uqcc1	0.00961397	0.239951	0.644	0.48	0.0638257
Ndufb6	0.00966975	0.263228	0.847	0.967	0.0641084
Mrpl58	0.0097081	0.277467	0.881	0.787	0.0642748
Csk	0.00973587	0.28251	0.407	0.373	0.0643708
Ddx55	0.00975452	0.203249	0.492	0.333	0.0644064
Rrm1	0.00979383	0.464962	0.339	0.227	0.0645781
Acaa1b	0.00985429	-0.40619	0.39	0.453	0.0648885
Psmc2	0.00990818	0.253451	0.831	0.867	0.0651541
Cdk4	0.00992147	0.33436	0.864	0.927	0.0651541
Ndufb3	0.0099396	0.282407	0.932	0.98	0.065185
Gm1673	0.00996627	0.336578	0.898	0.847	0.0652717
Chchd4	0.0100096	0.270636	0.729	0.667	0.065467
Slc9a3r1	0.0100303	0.28796	0.508	0.433	0.0655139
Ptcd3	0.0101193	0.215258	0.593	0.44	0.0660064
Cdk2ap2	0.0102247	0.31711	0.627	0.687	0.0665428
Tdrd3	0.0102301	0.239951	0.492	0.34	0.0665428
Hras	0.0102426	0.257342	0.949	0.9	0.0665428
Eef1d	0.0102723	0.28197	0.898	0.973	0.0666166
Nap1l1	0.0102814	0.376389	0.797	0.88	0.0666166
Cycs	0.0103049	0.337371	0.949	0.947	0.0666798
Afp	0.0105116	0.550681	0.576	0.453	0.0679262
2810004N23Rik	0.0106018	0.268711	0.712	0.66	0.0682778
Ccdc47	0.0106037	-0.142915	0.746	0.86	0.0682778
Alg10b	0.0106203	0.276652	0.458	0.28	0.0682778
Mvk	0.0106222	0.235456	0.508	0.36	0.0682778
Ado	0.0106517	0.239951	0.492	0.333	0.0683767
Dcaf15	0.0108064	0.239951	0.407	0.193	0.0692183
Atg3	0.0108114	0.267946	0.678	0.58	0.0692183
Top3b	0.0108296	0.254035	0.559	0.5	0.069244
Med6	0.0108539	0.239951	0.441	0.307	0.0693077
Tmem245	0.0108884	0.295909	0.559	0.487	0.0694365
Virma	0.0109277	0.261183	0.492	0.333	0.0695259
Exosc3	0.010931	0.228565	0.559	0.467	0.0695259
Homez	0.010951	0.298323	0.356	0.18	0.0695621
Csnk1g2	0.0109845	0.295301	0.644	0.687	0.0696832
Ak1	0.0110164	0.171631	0.305	0.293	0.0697946
Bag4	0.0110421	0.269059	0.508	0.4	0.0698659
Man2a1	0.01107	0.239951	0.458	0.28	0.0698829
Tns1	0.0110851	0.340963	0.78	0.693	0.0698829
Nol7	0.0110896	0.258794	0.898	0.947	0.0698829
Elp2	0.0111024	0.248181	0.475	0.373	0.0698829
Got1	0.0111574	0.355174	0.763	0.74	0.0701384
Mrps22	0.0112522	0.224446	0.61	0.447	0.0706429
Plin3	0.0113528	-0.241022	0.678	0.84	0.0711731
Slc25a10	0.011366	0.279171	0.424	0.267	0.0711731
Gpatch4	0.0113873	0.264643	0.492	0.38	0.071197
Wipf2	0.0114065	0.253681	0.492	0.307	0.071197
Crot	0.0114138	0.231918	0.593	0.46	0.071197
Ndufaf5	0.0114498	0.258133	0.407	0.293	0.0713295
Cnn3	0.0114684	0.265865	0.78	0.653	0.0713538
Stk16	0.0115005	0.311	0.729	0.76	0.071462
Fam20c	0.0115532	0.277691	0.373	0.267	0.071698
Crnkl1	0.0115889	0.189178	0.458	0.233	0.0718276
Ctnnbip1	0.0116673	0.280029	0.525	0.447	0.0721729
Traf7	0.0116744	0.201891	0.525	0.4	0.0721729
Chmp5	0.0116928	-0.121259	0.797	0.953	0.0721946
Espn	0.0118343	0.301644	0.356	0.267	0.0729759
Nudc	0.0119255	0.354956	0.847	0.873	0.073381
Zbtb20	0.0119417	-0.199253	0.458	0.693	0.073381
Iws1	0.0119549	0.279739	0.61	0.48	0.073381
Rabac1	0.0119605	-0.130028	0.915	0.993	0.073381
Ddx39b	0.012014	0.276992	0.864	0.907	0.0735237
Nacc1	0.0120141	0.278172	0.458	0.36	0.0735237
Fras1	0.0120725	0.291244	0.678	0.64	0.0737884
Fam136a	0.0121236	0.286217	0.661	0.7	0.0740073
Mrps36	0.0121427	0.293856	0.831	0.86	0.0740311
Kdm1a	0.0121612	-0.1268	0.627	0.78	0.0740506
Epb41l3	0.0122154	0.255866	0.288	0.18	0.0742871
Sptan1	0.0123032	0.286019	0.763	0.66	0.0747274
Galm	0.0124375	0.245066	0.407	0.24	0.075449
Ctcf	0.0125018	0.347371	0.831	0.827	0.0757446
Gm26917	0.0126099	0.380579	0.695	0.587	0.0763038
Gm13111	0.0126265	0.321501	0.576	0.493	0.0763094
Smn1	0.0127372	0.266023	0.525	0.493	0.0767161
Tspan6	0.0127463	0.273176	0.559	0.547	0.0767161
Sdk1	0.0127541	0.31006	0.39	0.16	0.0767161
Pisd	0.012757	0.206535	0.424	0.32	0.0767161
Osbpl1a	0.0127997	0.177252	0.593	0.6	0.0768773
Crk	0.0128382	0.213103	0.695	0.547	0.0769622
Zwint	0.0128455	0.286471	0.576	0.527	0.0769622
Rock1	0.0129099	-0.110423	0.746	0.833	0.0772527
Mdh2	0.0129573	0.229377	1	1	0.0773798
Larp7	0.0129739	0.271106	0.644	0.573	0.0773798
Hsd11b2	0.012979	0.600805	0.288	0.14	0.0773798
Kctd2	0.0129984	0.226879	0.492	0.327	0.0774004
Zmynd19	0.013063	0.330465	0.322	0.22	0.0776898
Ucp2	0.0131239	0.394506	0.695	0.52	0.0778114
Trappc5	0.0131241	0.236996	0.763	0.64	0.0778114
Sf3b3	0.0131316	0.308219	0.678	0.667	0.0778114
Alas1	0.0131605	0.269626	0.627	0.607	0.0778876
Park7	0.0131769	0.269375	0.966	0.987	0.0778895
Prpf40a	0.0132393	0.314501	0.847	0.847	0.0781634
Ldlr	0.0132579	0.320423	0.339	0.147	0.0781781
Jpt1	0.0133717	0.396989	0.712	0.793	0.0787537
Eri1	0.0134422	0.265015	0.424	0.24	0.0788577
Chtf8	0.0134471	0.324405	0.475	0.513	0.0788577
Fgfr1op	0.0134559	0.249707	0.424	0.247	0.0788577
Ak6	0.0134715	0.278953	0.678	0.64	0.0788577
Timp2	0.0134919	0.323601	0.542	0.527	0.0788577
Csad	0.0134955	0.279453	0.508	0.46	0.0788577
Isoc1	0.0135184	0.250349	0.644	0.507	0.0788577
Ube2g1	0.0135194	-0.182209	0.373	0.633	0.0788577
Ddt	0.0136666	0.219748	0.898	0.973	0.0796209
Prss12	0.0137283	-0.391639	0.119	0.32	0.079884
Ndufv1	0.0137974	0.236888	0.915	0.94	0.0800742
Cox5b	0.0137995	0.269866	0.983	0.993	0.0800742
Ggnbp2	0.0138104	0.291496	0.729	0.767	0.0800742
Ints6	0.013842	0.23565	0.475	0.367	0.0801616
Ttc1	0.0139101	0.266268	0.61	0.607	0.0804599
Ndufb2	0.0139361	0.273924	0.915	0.92	0.0805143
Psma1	0.0139712	0.27785	0.915	0.92	0.0806207
Nadk	0.0140389	0.22763	0.576	0.467	0.0809153
Brd1	0.0141427	0.272212	0.729	0.693	0.0814168
Gbe1	0.0141687	-0.178629	0.322	0.607	0.0814698
Slc2a4	0.0142914	0.192698	0.339	0.213	0.081986
Cth	0.0142922	0.284948	0.508	0.367	0.081986
Rangrf	0.0143277	0.226252	0.695	0.553	0.082031
Ssbp4	0.014339	0.282684	0.831	0.8	0.082031
Birc5	0.0143508	0.772571	0.407	0.207	0.082031
Knstrn	0.0144107	0.474916	0.339	0.133	0.0822764
Ppp1r11	0.014512	0.274391	0.746	0.753	0.0825481
Slc35a4	0.0145129	0.262593	0.525	0.447	0.0825481
Kansl1	0.0145196	0.24358	0.61	0.467	0.0825481
Zfp523	0.0145393	0.221259	0.542	0.313	0.0825481
Mex3a	0.0145481	0.440621	0.458	0.493	0.0825481
Eif3a	0.0145603	0.260631	0.915	0.98	0.0825481
Tacc1	0.0147002	-0.222525	0.559	0.713	0.0832441
Junb	0.0147287	-0.451195	0.458	0.527	0.0833084
Hsph1	0.0147626	0.218808	0.525	0.38	0.0834029
Nelfb	0.0149669	0.23617	0.627	0.48	0.0844583
Ak2	0.0150764	0.268889	0.847	0.873	0.0849453
Hoxa5	0.0150882	0.2299	0.407	0.267	0.0849453
Gnpat	0.0152659	0.213748	0.508	0.387	0.0858466
Lamc1	0.0152945	0.350947	0.746	0.667	0.0859074
Dgcr6	0.0153652	0.254095	0.78	0.713	0.0861133
Mau2	0.0153666	0.235686	0.542	0.393	0.0861133
Hk1	0.0154002	0.300197	0.729	0.693	0.0862018
Plxnb2	0.0154196	0.309909	0.729	0.687	0.0862111
Chchd2	0.0154609	0.202275	1	1	0.0863424
Ociad2	0.0155127	-0.255992	0.339	0.533	0.0864618
Dnajc19	0.0155179	0.273103	0.763	0.747	0.0864618
Afm	0.0156957	0.209179	0.39	0.193	0.0873524
Peg3	0.0157372	0.442111	0.593	0.46	0.0874832
Peli1	0.0157907	-0.144461	0.407	0.6	0.0876798
Arl6ip4	0.0158452	0.324921	0.559	0.613	0.087882
Pten	0.0158851	0.270348	0.678	0.62	0.0879874
Tcp1	0.0159005	0.265268	0.932	0.973	0.0879874
Smarcd1	0.0159258	0.247919	0.458	0.4	0.0880272
Ylpm1	0.0159713	0.281052	0.559	0.487	0.0881782
Vars	0.0160478	0.312363	0.508	0.373	0.0884999
Vdac3	0.0160857	0.255489	0.915	0.967	0.0886081
Bzw2	0.0161425	0.324914	0.881	0.92	0.0886288
Ankrd26	0.0161431	0.253681	0.39	0.287	0.0886288
Usp34	0.0161442	0.282692	0.763	0.72	0.0886288
Med1	0.01618	0.23636	0.627	0.493	0.0886934
Bpgm	0.0162098	0.26835	0.475	0.427	0.0886934
Senp2	0.0162244	0.221602	0.492	0.367	0.0886934
Ythdf2	0.0162291	0.278894	0.559	0.513	0.0886934
Flot1	0.0163234	-0.20552	0.441	0.553	0.0890302
Mtpap	0.0163433	0.211241	0.441	0.307	0.0890302
Nradd	0.0163512	0.235154	0.373	0.267	0.0890302
Men1	0.0163641	0.2767	0.356	0.207	0.0890302
Nudt21	0.0163864	0.306326	0.661	0.74	0.0890515
Mapre2	0.0165781	0.23	0.424	0.253	0.089917
Hmgn5	0.0165827	0.310687	0.61	0.647	0.089917
Fez2	0.0166537	0.207862	0.407	0.213	0.0901281
Magi1	0.0166587	0.244963	0.441	0.24	0.0901281
Nubp2	0.0166862	0.239951	0.458	0.293	0.0901759
Bod1	0.0167691	0.293891	0.831	0.733	0.0905232
Itpr1	0.0168867	0.285413	0.644	0.553	0.0908755
Nop10	0.0168888	0.319773	0.847	0.907	0.0908755
Nrbf2	0.0168905	0.261738	0.441	0.387	0.0908755
Ubap1	0.0169952	0.204504	0.441	0.273	0.0910897
Erp29	0.0169956	0.267121	0.932	0.94	0.0910897
Gyg	0.0170092	-0.242207	0.373	0.5	0.0910897
Ndufb10	0.0170146	0.16299	0.983	0.987	0.0910897
Narf	0.0170242	-0.194088	0.508	0.633	0.0910897
Flywch2	0.0170668	0.26193	0.508	0.467	0.0912173
Ahcyl2	0.0171345	-0.181019	0.525	0.7	0.0913418
Prr15l	0.0171434	-0.165514	0.695	0.813	0.0913418
Denr	0.0171466	0.303173	0.729	0.78	0.0913418
Suclg1	0.017169	0.236286	0.932	0.993	0.0913611
Heatr3	0.0172326	0.260153	0.373	0.253	0.0915991
Eipr1	0.0174429	0.199945	0.441	0.293	0.0926056
Tmem183a	0.0174602	0.235793	0.508	0.407	0.0926056
Amotl1	0.0175	0.203583	0.441	0.3	0.0927159
Surf1	0.0175496	-0.198304	0.424	0.553	0.0928045
Rpap3	0.0175709	0.274371	0.475	0.427	0.0928045
Caprin1	0.0175741	0.303352	0.831	0.813	0.0928045
Hnrnph3	0.0176107	0.305851	0.712	0.707	0.0928963
Ndufaf2	0.017667	0.296082	0.746	0.733	0.0930922
Fasn	0.0176909	0.289399	0.39	0.28	0.0931169
Psmd13	0.0177311	0.265874	0.864	0.82	0.0932278
Mcm4	0.0178157	0.388907	0.305	0.207	0.0934169
Ttyh3	0.0178427	0.276652	0.356	0.313	0.0934169
Mapk15	0.017847	0.235061	0.424	0.273	0.0934169
Pttg1	0.0179029	-0.165514	0.797	0.953	0.0934169
Rps19bp1	0.0179374	0.258527	0.763	0.6	0.0934169
Wnk1	0.0179506	0.312661	0.678	0.613	0.0934169
1700020I14Rik	0.0179599	0.254641	0.797	0.747	0.0934169
Nf1	0.0179638	0.215736	0.458	0.28	0.0934169
Ube2j2	0.017973	0.259369	0.627	0.64	0.0934169
Tcaf1	0.017975	0.278894	0.525	0.453	0.0934169
Wdr36	0.0179789	0.178075	0.407	0.24	0.0934169
Tmem126a	0.0181427	0.242429	0.797	0.76	0.0940826
Ndst1	0.0181457	0.244465	0.39	0.32	0.0940826
Ncl	0.0182116	0.298198	0.966	0.993	0.0942549
Slc38a1	0.0182178	0.343882	0.695	0.713	0.0942549
Arpp19	0.0183142	0.29306	0.898	0.913	0.0946473
Me2	0.0183548	0.261691	0.339	0.173	0.0946473
Tardbp	0.0183626	0.276027	0.814	0.76	0.0946473
Fiz1	0.0183717	0.231367	0.576	0.367	0.0946473
Gstm2	0.0184335	0.258999	0.458	0.253	0.0947758
Slirp	0.0184357	0.265743	0.763	0.72	0.0947758
Palm3	0.0184888	-0.318329	0.508	0.58	0.0949481
Gm5914	0.018551	0.190189	0.441	0.26	0.0951573
Aprt	0.0185687	0.281623	0.864	0.96	0.0951573
Dhx29	0.0185919	0.234809	0.339	0.233	0.0951757
Dhfr	0.0187723	0.395515	0.339	0.207	0.0959581
Tmem97	0.0187843	0.297109	0.373	0.267	0.0959581
Cntrl	0.0188151	0.234531	0.373	0.193	0.0960142
Pygm	0.0188546	0.259753	0.305	0.18	0.0960164
Dcaf8	0.0188551	-0.10452	0.576	0.793	0.0960164
Abhd17b	0.0189229	0.232169	0.661	0.473	0.09604
Shmt2	0.0189383	0.223001	0.492	0.413	0.09604
Uck1	0.0189435	0.225899	0.475	0.28	0.09604
Pfn2	0.0189709	0.25876	0.678	0.527	0.09604
Rrp9	0.0189905	0.24952	0.407	0.28	0.09604
Tmem230	0.0190264	-0.186349	0.407	0.567	0.09604
Dhx9	0.0190472	0.302023	0.729	0.667	0.09604
Drosha	0.0190483	0.293232	0.373	0.273	0.09604
Rap2a	0.019053	0.210392	0.39	0.307	0.09604
Tcn2	0.0190576	-0.203593	0.576	0.767	0.09604
Timm9	0.0190877	0.302111	0.729	0.747	0.0960917
Armc8	0.0191574	0.259559	0.373	0.273	0.0963429
Itgb3bp	0.0192327	0.239951	0.39	0.3	0.0966215
Calu	0.0193355	0.262731	0.78	0.753	0.0970376
Mbd3	0.0193733	0.302818	0.797	0.86	0.0971165
Nudt5	0.0193913	0.264342	0.593	0.64	0.0971165
Txnl1	0.0194766	0.253515	0.78	0.933	0.0974435
Rad21	0.0196766	0.340454	0.763	0.733	0.0983413
Abca13	0.0196966	0.294018	0.288	0.22	0.0983413
Nup98	0.0197261	0.213975	0.458	0.247	0.0983874
Prkaa2	0.0197516	0.243895	0.508	0.453	0.0984132
Gps1	0.019843	0.258643	0.746	0.72	0.0986663
Clmn	0.0198431	0.225964	0.525	0.453	0.0986663
Zfp618	0.0199569	0.305748	0.712	0.667	0.099131
4932438A13Rik	0.0200627	-0.211575	0.424	0.527	0.0994608
Pdcd11	0.0200643	0.29914	0.61	0.667	0.0994608
Actb	0.0201621	0.282246	1	1	0.0998435
Sgms1	0.0202427	-0.151872	0.508	0.667	0.10014
Pja1	0.020286	0.253937	0.729	0.613	0.100252
Atp2b1	0.0203242	0.313418	0.864	0.893	0.100339
Rhob	0.020399	-0.299494	0.271	0.487	0.100481
Palm	0.0204105	-0.193141	0.458	0.613	0.100481
Tpr	0.0204151	0.295349	0.864	0.967	0.100481
Uqcr10	0.020463	0.304622	1	0.993	0.100615
Sgms2	0.020493	-0.268893	0.39	0.56	0.10066
Cdc42ep2	0.0205518	0.259832	0.492	0.413	0.100799
Cltc	0.0205641	0.295091	0.763	0.773	0.100799
Nubp1	0.0205835	0.232625	0.627	0.553	0.100799
Ndufc1	0.0207815	0.244801	0.932	0.987	0.10163
Smc3	0.0208067	0.285071	0.847	0.82	0.10163
Sos1	0.0208509	0.230472	0.441	0.287	0.10163
Pold3	0.0208579	0.208345	0.458	0.353	0.10163
Sub1	0.0208808	0.29077	0.983	0.993	0.10163
Nudcd2	0.0208973	0.274522	0.695	0.68	0.10163
Prmt7	0.0208999	0.244024	0.508	0.427	0.10163
Mrpl21	0.0209583	0.25741	0.797	0.847	0.101683
Limd1	0.0209633	0.252221	0.661	0.54	0.101683
Btg1	0.0209735	-0.212034	0.661	0.773	0.101683
Zfp292	0.021052	-0.116724	0.729	0.86	0.101962
Prkrip1	0.0211677	0.188895	0.525	0.373	0.102267
Hadh	0.0211763	0.278094	0.831	0.913	0.102267
Serinc2	0.0211787	0.327812	0.373	0.227	0.102267
Trip10	0.0211994	0.208628	0.492	0.4	0.102267
Phf3	0.0212911	-0.134575	0.729	0.78	0.102607
Mbtps1	0.0214339	0.25057	0.593	0.513	0.103046
Kif12	0.0214448	-0.141704	0.61	0.733	0.103046
Mmgt1	0.0214459	0.239951	0.356	0.247	0.103046
Hnrnph2	0.0215982	0.219044	0.61	0.547	0.103663
Chchd1	0.0216169	0.266153	0.864	0.827	0.103663
Ipo8	0.0217418	0.221932	0.458	0.387	0.104088
Pde4dip	0.0217567	0.235927	0.593	0.413	0.104088
Mcm5	0.02177	0.415682	0.373	0.173	0.104088
Rsbn1	0.021825	-0.172093	0.424	0.613	0.104103
Zmat2	0.0218277	0.251074	0.797	0.8	0.104103
Nup62	0.0218374	0.273567	0.475	0.347	0.104103
Gpx4	0.021888	0.298323	0.966	0.993	0.104242
Nisch	0.0219377	0.321056	0.881	0.873	0.104251
Pigx	0.0219475	0.265926	0.746	0.733	0.104251
Dlgap4	0.0219543	-0.192183	0.508	0.613	0.104251
Med28	0.0220814	0.283436	0.746	0.8	0.104752
Psmd7	0.0221089	0.304663	0.881	0.88	0.10478
Akr1b3	0.0221445	0.254678	0.644	0.607	0.104846
Krr1	0.0222902	0.217478	0.492	0.32	0.105433
Rab26os	0.0223683	0.23	0.407	0.233	0.105699
Uhrf2	0.0224569	0.338069	0.61	0.627	0.106015
Maged2	0.0225605	0.346033	0.831	0.773	0.1064
Top2a	0.0225943	0.918003	0.458	0.227	0.106421
Prpf19	0.0226184	0.300243	0.627	0.647	0.106421
Trir	0.0226307	0.297109	0.831	0.893	0.106421
Mkrn1	0.0226643	-0.137125	0.559	0.727	0.106476
Mad2l1	0.0227663	0.378992	0.356	0.107	0.106852
Cct4	0.0228073	0.230123	0.915	0.947	0.106941
Ccdc86	0.0228671	0.207161	0.475	0.333	0.107118
Gphn	0.0229614	0.251124	0.525	0.427	0.107456
Gpc3	0.0230611	-0.147306	0.831	0.847	0.107721
Krcc1	0.0230824	0.31141	0.746	0.76	0.107721
Tfdp1	0.0230847	0.310568	0.339	0.26	0.107721
Cluh	0.0231731	0.357412	0.627	0.653	0.10797
Snrpb2	0.0231825	0.280982	0.661	0.753	0.10797
Hoxa10	0.0232501	0.466332	0.627	0.62	0.108181
Pmepa1	0.0232877	-0.268169	0.424	0.593	0.108252
Tmem51	0.0233336	-0.186134	0.339	0.54	0.108362
Las1l	0.0233719	0.261573	0.695	0.633	0.108436
Kmt5a	0.0234564	0.339701	0.661	0.687	0.108579
Leo1	0.0234574	0.243503	0.576	0.547	0.108579
Azin1	0.0234814	0.265453	0.559	0.453	0.108579
Rex1bd	0.0234922	0.323682	0.729	0.767	0.108579
Eif4g1	0.0235887	0.382371	0.763	0.807	0.108844
Use1	0.0236004	-0.142141	0.729	0.833	0.108844
Crebrf	0.0236169	-0.294591	0.203	0.393	0.108844
Fermt1	0.0236667	0.199541	0.356	0.207	0.10897
Cpq	0.0237501	-0.272173	0.203	0.407	0.109251
Pcbp2	0.023801	0.264915	0.932	0.96	0.109299
2022-09-09	0.0238057	0.239951	0.475	0.3	0.109299
Tgoln1	0.0238322	0.239951	0.593	0.567	0.109317
Tsn	0.0238721	0.275699	0.847	0.88	0.109389
Cenpm	0.0239413	0.332927	0.373	0.167	0.109389
Gtf2b	0.0239486	0.236623	0.678	0.553	0.109389
Cotl1	0.0239569	0.247331	0.525	0.52	0.109389
Ssfa2	0.023961	0.226029	0.356	0.273	0.109389
Pofut2	0.0239832	0.210963	0.661	0.56	0.109389
Lsr	0.0240094	0.290632	0.729	0.62	0.109406
Tor1aip2	0.0240697	0.251124	0.627	0.467	0.109578
Snrnp48	0.024138	0.237114	0.695	0.633	0.109786
Idh3a	0.0242883	0.371431	0.831	0.86	0.110366
Nono	0.0243592	0.257192	0.898	0.94	0.110471
Twf2	0.0243862	0.195499	0.576	0.36	0.110471
Acat2	0.0243978	0.254069	0.39	0.28	0.110471
Zdhhc13	0.0244209	0.218444	0.356	0.22	0.110471
Ptpa	0.0244251	0.250278	0.627	0.58	0.110471
Sytl2	0.0244609	-0.303665	0.288	0.48	0.110529
Crcp	0.0245272	0.255699	0.373	0.207	0.110726
Cbx3	0.0247799	0.323601	0.763	0.847	0.111627
Tspan3	0.024793	0.272957	0.898	0.92	0.111627
Magoh	0.0247991	0.263037	0.729	0.807	0.111627
Prom1	0.0248188	0.339891	0.61	0.62	0.111627
Mrpl12	0.0249811	0.265543	0.949	0.953	0.112225
Tmem178	0.0250185	0.243607	0.593	0.467	0.112225
Ddx28	0.025041	0.179987	0.373	0.227	0.112225
Chmp6	0.0250442	0.208698	0.508	0.467	0.112225
Phb2	0.0251262	0.25663	0.949	0.98	0.112489
Hmgn3	0.0251614	0.270104	0.729	0.66	0.112542
Sumf2	0.0253033	0.231293	0.407	0.353	0.113007
Psme4	0.0253199	0.25088	0.576	0.5	0.113007
Pwp1	0.0253351	0.20073	0.441	0.32	0.113007
Psmg3	0.0253619	0.204233	0.525	0.393	0.113018
Khk	0.0253842	-0.182727	0.39	0.58	0.113018
Crip2	0.025448	0.426576	0.746	0.713	0.113198
Zfp672	0.0255533	0.196778	0.458	0.3	0.113562
Macrod2	0.0256454	0.244635	0.407	0.307	0.113867
Kctd5	0.0257281	0.239951	0.339	0.2	0.11413
Bola2	0.0258554	0.277173	0.864	0.86	0.114521
Dusp18	0.0258816	-0.155945	0.356	0.58	0.114521
Gpx8	0.025887	0.267897	0.492	0.373	0.114521
Hes6	0.0260736	0.232107	0.525	0.48	0.115242
Sae1	0.0261843	0.273852	0.729	0.72	0.115507
Mrpl55	0.0261858	0.251314	0.797	0.7	0.115507
Pcnt	0.0262156	0.207764	0.441	0.287	0.115507
Dcaf1	0.0262288	0.223144	0.508	0.393	0.115507
Dr1	0.0262599	0.195499	0.441	0.28	0.115539
Wwtr1	0.0263268	-0.174325	0.492	0.68	0.115728
Armc1	0.0265462	0.230561	0.678	0.587	0.116587
Sssca1	0.0266681	0.266062	0.712	0.667	0.117017
Cdc42se2	0.0267261	0.227319	0.492	0.407	0.117165
Ftl1	0.0267577	0.119033	1	1	0.117198
Utp3	0.0268575	0.255296	0.763	0.707	0.117529
Ube3a	0.0269534	0.259905	0.831	0.873	0.117822
Nup93	0.0269844	0.239951	0.424	0.327	0.117822
Tmx3	0.0269974	-0.190294	0.39	0.513	0.117822
Psmd14	0.0270845	0.253937	0.729	0.68	0.118003
Speg	0.0271028	0.226283	0.475	0.313	0.118003
Nifk	0.0271308	0.236578	0.627	0.527	0.118003
Aldh2	0.0271361	-0.110967	0.881	0.933	0.118003
Thoc3	0.0272241	0.227212	0.678	0.587	0.11828
Med8	0.0272604	0.225766	0.695	0.633	0.118332
Cdc20	0.0273318	0.611364	0.424	0.167	0.118455
Ormdl2	0.0273377	0.223743	0.746	0.553	0.118455
Maml3	0.02743	0.26193	0.373	0.327	0.118722
Cdk1	0.0274481	0.453209	0.475	0.34	0.118722
2022-09-01	0.0275374	0.203393	0.39	0.22	0.118911
Baz1b	0.0275408	0.286471	0.576	0.54	0.118911
Fbl	0.0275793	0.302818	0.814	0.807	0.11897
Abat	0.0276037	0.26193	0.305	0.16	0.11897
Cmc2	0.0276962	0.378701	0.695	0.733	0.119263
Polr2e	0.027864	0.260153	0.831	0.773	0.119879
Chchd7	0.0279089	0.292136	0.763	0.74	0.119966
Slc35b2	0.0279574	0.232169	0.508	0.493	0.120068
Hsd17b7	0.0279862	0.26294	0.339	0.12	0.120086
Guk1	0.0281883	0.231617	0.831	0.773	0.120846
Trappc1	0.0282577	0.224366	0.78	0.713	0.121037
Dapk3	0.0285504	-0.144649	0.475	0.647	0.122169
Gkap1	0.0285725	0.242845	0.61	0.607	0.122169
Pank3	0.0288597	0.226647	0.39	0.32	0.123289
Thoc7	0.0289054	0.281798	0.915	0.927	0.123376
Emid1	0.0290447	0.275669	0.39	0.313	0.123738
Gm8186	0.0290509	0.219666	0.441	0.44	0.123738
Oat	0.0290667	0.223237	0.644	0.653	0.123738
Hscb	0.0291705	0.196891	0.576	0.493	0.12407
Pabpc1	0.0292657	0.336696	0.864	0.967	0.124315
Anxa2	0.029289	-0.262469	0.712	0.82	0.124315
Fam13a	0.0293048	0.174353	0.475	0.38	0.124315
1500009L16Rik	0.0294014	0.376402	0.356	0.08	0.124616
Sart3	0.0294464	0.270588	0.492	0.34	0.124698
Gprc5c	0.0295865	-0.135499	0.458	0.647	0.125115
Otud6b	0.0295967	0.195891	0.525	0.387	0.125115
Cnih1	0.0298208	0.234016	0.695	0.68	0.1259
Rab5c	0.0298341	0.247295	0.847	0.687	0.1259
Rab3gap1	0.0299243	0.193233	0.542	0.427	0.126171
Ndrg1	0.0299901	-0.360823	0.254	0.353	0.126339
1700021F05Rik	0.0301444	0.257256	0.712	0.74	0.126878
Cox6a1	0.0301987	0.207017	0.966	0.987	0.12692
Ndufa11	0.0302905	0.191804	0.966	0.987	0.12692
Hpf1	0.030326	0.286743	0.593	0.613	0.12692
Tmed1	0.0303346	0.252043	0.729	0.753	0.12692
Ubqln1	0.0303562	0.217333	0.678	0.547	0.12692
Fam216a	0.0303598	0.248181	0.475	0.36	0.12692
Ilkap	0.0303627	0.233171	0.61	0.527	0.12692
Tmem59	0.0303895	-0.114543	0.949	0.98	0.12692
Rbm7	0.0304081	0.21158	0.61	0.533	0.12692
Alg5	0.0304158	0.207632	0.61	0.487	0.12692
Mpp6	0.0304751	0.314731	0.695	0.727	0.127058
Slc25a17	0.0305418	0.269325	0.678	0.687	0.127121
Prkag1	0.0305426	0.214724	0.576	0.573	0.127121
Mydgf	0.0306169	0.254876	0.763	0.873	0.127321
Trpv4	0.0307288	0.27424	0.322	0.1	0.127668
Snapc5	0.030753	0.221867	0.61	0.5	0.127668
Hoxb2	0.0309621	0.233642	0.746	0.707	0.128201
Glul	0.0309785	0.282062	0.288	0.193	0.128201
Ezh2	0.0310889	0.375705	0.593	0.607	0.128201
Fbxw8	0.0310996	0.199541	0.373	0.273	0.128201
Taok3	0.0311369	0.231293	0.407	0.367	0.128201
Rrp15	0.0311386	0.282842	0.424	0.42	0.128201
Mrpl10	0.0311547	0.176581	0.492	0.387	0.128201
Chmp2a	0.0311591	-0.15832	0.881	0.933	0.128201
Plekha7	0.0311678	-0.149816	0.424	0.573	0.128201
Hat1	0.0311888	0.305702	0.61	0.613	0.128201
Ipo9	0.0312038	0.176772	0.424	0.26	0.128201
Dmac1	0.0312199	0.236645	0.576	0.58	0.128201
Rcbtb2	0.0312246	0.220278	0.661	0.573	0.128201
Aqr	0.0313248	0.182322	0.525	0.447	0.128503
Ckap4	0.0313664	0.270588	0.814	0.873	0.128565
Ildr1	0.0313991	0.210098	0.441	0.293	0.12859
Eif4a3	0.0315833	0.287236	0.763	0.8	0.129236
Ccdc189	0.0316596	-0.21154	0.356	0.5	0.129246
Psmd1	0.0316635	0.314674	0.763	0.76	0.129246
Yif1b	0.0316657	0.233306	0.864	0.78	0.129246
Drg2	0.0318018	0.216045	0.525	0.473	0.12961
Fbxl19	0.0318084	0.197391	0.356	0.22	0.12961
Psmb5	0.0318593	0.264572	0.949	1	0.129709
Aebp1	0.0319445	0.213517	0.339	0.22	0.129928
Zkscan1	0.0319666	-0.103359	0.729	0.8	0.129928
Ncoa1	0.0320263	0.193627	0.508	0.393	0.130062
Sf3b6	0.0320806	0.278806	0.831	0.927	0.130173
Ppp2r5e	0.0321351	0.185883	0.542	0.433	0.130286
Alkbh1	0.0322388	0.232833	0.593	0.487	0.130544
Rpf2	0.0322527	0.231293	0.475	0.393	0.130544
Qprt	0.0323681	0.195988	0.322	0.2	0.130902
Ptpn11	0.0324197	0.205818	0.661	0.56	0.131001
Thoc2	0.0326184	0.208402	0.881	0.767	0.131695
Prkacb	0.0327076	0.21999	0.525	0.42	0.131945
Rtf1	0.0328652	0.276027	0.712	0.827	0.132471
Smc1a	0.0330906	0.370052	0.763	0.747	0.133269
Trim28	0.0331329	0.312137	0.797	0.793	0.133328
Plekha8	0.0335326	0.2299	0.373	0.267	0.134825
Ier3	0.0336208	0.256441	0.492	0.473	0.134965
Nop2	0.0336231	0.201851	0.441	0.353	0.134965
Zmiz2	0.0336687	0.252966	0.441	0.367	0.135036
Cdca3	0.0337141	0.572753	0.288	0.14	0.135036
Hnrnpf	0.0337241	0.275324	0.949	0.987	0.135036
Ergic1	0.0337808	0.220304	0.508	0.427	0.135151
Pim1	0.0338669	-0.21763	0.237	0.433	0.135384
Khdrbs3	0.0339127	0.239951	0.492	0.407	0.135455
Tex9	0.0340793	0.207427	0.508	0.4	0.135995
1110059E24Rik	0.0341039	0.217274	0.407	0.373	0.135995
Snrnp25	0.0341369	0.242967	0.627	0.587	0.136015
Crls1	0.0341945	0.139146	0.475	0.367	0.136133
Usp36	0.0342937	0.195499	0.407	0.287	0.136416
Trappc2l	0.0343747	-0.102804	0.712	0.82	0.136529
Bst2	0.0343784	-0.272079	0.271	0.373	0.136529
Timm17a	0.0344147	0.237526	0.898	0.933	0.136544
Grb10	0.0344433	0.252404	0.712	0.687	0.136544
S100a11	0.0344666	-0.165514	0.746	0.893	0.136544
Abhd13	0.0345045	0.245228	0.339	0.207	0.136583
Camk2n1	0.0345861	-0.170905	0.763	0.847	0.136794
Zc3h13	0.0346226	-0.111548	0.746	0.76	0.136796
Dctd	0.034643	0.262731	0.407	0.307	0.136796
Tbc1d23	0.0346793	0.195934	0.441	0.293	0.136803
Slc38a10	0.0347012	0.254766	0.763	0.62	0.136803
Nptn	0.0347644	0.227902	0.627	0.587	0.136861
Exoc3	0.0347722	-0.119917	0.661	0.793	0.136861
Arl16	0.0348069	0.170217	0.424	0.26	0.136886
Tom1l2	0.0348559	-0.179167	0.373	0.54	0.136968
Tfap2b	0.0349731	0.359641	0.898	0.913	0.137192
Lman2	0.0349874	0.250785	0.847	0.787	0.137192
Mboat2	0.0349977	0.259369	0.661	0.573	0.137192
Slc43a2	0.0350309	0.175192	0.525	0.48	0.137212
Cfap36	0.0351825	0.21577	0.644	0.507	0.137694
Cpsf2	0.0352553	0.295521	0.525	0.493	0.137781
Snhg12	0.0352615	0.232107	0.475	0.42	0.137781
Sdhaf1	0.0353292	0.268122	0.763	0.727	0.137828
Sbf2	0.0353303	0.235861	0.475	0.433	0.137828
Mki67	0.0356633	0.835855	0.458	0.2	0.139015
Rab25	0.0356936	-0.11838	0.593	0.78	0.139022
Polr2g	0.0358416	0.22681	0.763	0.78	0.139454
Smg7	0.0358621	0.198278	0.424	0.233	0.139454
Atp5g3	0.0360045	0.352452	0.949	0.993	0.139896
Mapk6	0.0361593	0.204141	0.373	0.273	0.140301
Cldnd1	0.0361665	0.22435	0.678	0.613	0.140301
Phactr2	0.0362997	0.192323	0.542	0.44	0.14061
Arih2	0.0363041	0.173088	0.356	0.28	0.14061
Ptpn9	0.0363745	0.189365	0.458	0.353	0.140708
Tmem42	0.0364182	0.2009	0.542	0.38	0.140708
Elovl6	0.0364555	0.291538	0.576	0.607	0.140708
Zfand3	0.0364943	0.220304	0.525	0.46	0.140708
Ncoa2	0.0364973	0.225493	0.39	0.3	0.140708
Sqstm1	0.0365035	-0.165514	0.475	0.627	0.140708
Zranb2	0.036593	0.250549	0.847	0.873	0.140941
E2f6	0.0366605	0.207862	0.356	0.213	0.141036
Usp38	0.0367071	0.212248	0.373	0.187	0.141036
Tob1	0.0367183	0.171514	0.576	0.473	0.141036
Qdpr	0.036734	0.245092	0.729	0.687	0.141036
Rnf8	0.0368045	0.18367	0.39	0.313	0.141123
Smim12	0.0368146	0.21642	0.576	0.473	0.141123
Mybbp1a	0.0371218	0.337748	0.458	0.493	0.142188
Polr1d	0.0371559	0.241077	0.898	0.92	0.142206
Dync1h1	0.0372196	0.25847	0.797	0.753	0.142338
Tfg	0.037356	0.260052	0.695	0.713	0.142722
Abhd14b	0.0374105	-0.20443	0.508	0.68	0.142722
Daam1	0.0374641	0.247673	0.492	0.407	0.142722
Psme3	0.0374672	0.227829	0.475	0.387	0.142722
Atp5j2	0.0374861	0.219063	1	0.987	0.142722
Pinx1	0.0374966	0.221932	0.475	0.333	0.142722
Stxbp6	0.0375619	0.164443	0.424	0.32	0.142775
Fkbp2	0.0375691	0.262068	0.898	0.92	0.142775
Sdc4	0.037698	-0.11444	0.949	0.993	0.143136
Parva	0.0377314	0.236907	0.695	0.647	0.143136
Fam107b	0.0377638	-0.282624	0.508	0.56	0.143136
Ints6l	0.0377822	-0.172582	0.322	0.473	0.143136
Hnrnpa2b1	0.0378331	0.247479	0.983	0.987	0.143217
Ralb	0.0380037	0.198104	0.508	0.42	0.143657
Ss18	0.0380085	0.247983	0.492	0.447	0.143657
Ptdss1	0.038182	0.196933	0.373	0.213	0.144103
Atp6v0a2	0.0381858	0.159908	0.373	0.3	0.144103
Dnajc9	0.0383055	0.337406	0.542	0.327	0.144442
Ccnt2	0.0383967	0.221735	0.576	0.54	0.144659
Itgb1	0.0384228	0.250983	0.898	0.86	0.144659
Tsfm	0.0385112	0.275557	0.763	0.827	0.144786
2900026A02Rik	0.0385162	0.219117	0.39	0.227	0.144786
Tmc4	0.0385989	-0.222673	0.322	0.493	0.144985
Tyms	0.0387408	0.461058	0.559	0.4	0.145405
Rpl39	0.0387763	0.287531	1	1	0.145426
Nudt22	0.038845	0.214541	0.627	0.547	0.145571
Usp39	0.0389334	0.207161	0.441	0.327	0.14579
Prkce	0.0389868	0.196933	0.373	0.193	0.145828
Dpp3	0.0390036	0.16763	0.695	0.52	0.145828
Dmwd	0.0390691	0.189826	0.39	0.367	0.145903
Gbf1	0.0391334	0.204019	0.559	0.48	0.145903
Kl	0.0391754	0.230648	0.186	0.2	0.145903
Hao2	0.0392372	0.194141	0.288	0.26	0.145903
Snx7	0.0392389	0.179326	0.39	0.28	0.145903
Lrrc58	0.0392418	-0.147815	0.525	0.647	0.145903
Rps6kb2	0.0392883	0.187583	0.339	0.253	0.145903
Zfp961	0.0393232	0.245342	0.339	0.193	0.145903
Ubac1	0.0393327	0.226081	0.695	0.66	0.145903
Sv2a	0.039347	0.168492	0.407	0.34	0.145903
Fundc1	0.0393605	0.190279	0.475	0.333	0.145903
Ndufaf1	0.0393845	0.183043	0.542	0.433	0.145903
Lyrm9	0.0394169	-0.172435	0.39	0.527	0.145912
Rnpc3	0.0394655	0.160754	0.407	0.26	0.145968
Gfer	0.0394924	0.213781	0.593	0.52	0.145968
Tpp2	0.0395866	0.21546	0.525	0.427	0.146205
Atp5a1	0.0396557	0.186609	1	1	0.146325
Rps15a	0.0396792	0.133	1	1	0.146325
Cxcl14	0.0397373	0.490095	0.271	0.14	0.146428
Acot7	0.0397761	0.256037	0.356	0.173	0.146459
AI837181	0.0398582	0.188657	0.508	0.413	0.146585
Cks1b	0.0398705	0.397696	0.576	0.567	0.146585
Chd8	0.0401205	0.258413	0.661	0.587	0.147392
Fxn	0.0402562	0.21318	0.61	0.487	0.147779
Tusc2	0.0403339	0.210224	0.475	0.427	0.147952
Selenow	0.0404163	0.275839	1	0.96	0.148142
Dcun1d5	0.0405539	0.237628	0.847	0.753	0.148534
Atp5b	0.0406721	0.156497	1	1	0.148634
Tbx2	0.0406807	0.344154	0.271	0.113	0.148634
Ndufa8	0.0406809	0.176881	0.932	0.993	0.148634
Hdlbp	0.0407037	0.286719	0.915	0.927	0.148634
Zbtb43	0.0408785	0.166926	0.424	0.353	0.14916
Mllt6	0.0409254	0.201111	0.424	0.273	0.149183
Psmb1	0.0409622	0.222722	0.983	0.987	0.149183
Pcnx3	0.0409769	0.230194	0.39	0.267	0.149183
Sike1	0.0411038	-0.135361	0.424	0.593	0.149388
Pet100	0.0411869	0.260006	0.847	0.873	0.149388
Zfp639	0.0411991	0.185883	0.508	0.347	0.149388
Med9	0.0412036	0.228819	0.559	0.493	0.149388
9930021J03Rik	0.0412457	0.232678	0.508	0.54	0.149388
Plau	0.0412649	-0.453197	0.271	0.44	0.149388
Ptp4a2	0.0412684	0.300859	0.881	0.86	0.149388
N4bp2	0.0412795	-0.124015	0.475	0.587	0.149388
Szrd1	0.0413504	0.227829	0.525	0.447	0.149478
Cse1l	0.0414233	0.253681	0.356	0.333	0.149478
Slc22a17	0.0414264	0.179326	0.475	0.407	0.149478
Ncln	0.0414274	0.208452	0.576	0.453	0.149478
Dbn1	0.0416919	0.233436	0.61	0.553	0.150305
Mrpl34	0.0417187	0.21614	0.898	0.973	0.150305
Pno1	0.0417563	0.239951	0.508	0.48	0.150329
Mrpl39	0.041823	0.210537	0.542	0.5	0.150457
Gm30025	0.041931	0.201111	0.373	0.273	0.150734
Polr2k	0.0419887	0.251174	0.814	0.82	0.150764
Oxct1	0.0420013	0.317022	0.983	0.9	0.150764
Dph3	0.0421851	0.257729	0.763	0.793	0.151273
Rps4x	0.0422175	0.120945	1	1	0.151273
Acaa1a	0.0422643	-0.116209	0.831	0.86	0.151273
Skp2	0.042294	0.348754	0.322	0.147	0.151273
Spryd4	0.042299	0.146619	0.441	0.307	0.151273
Umod	0.0424109	-0.419443	0.39	0.487	0.15149
Ehmt1	0.0424222	0.255407	0.627	0.6	0.15149
Pgp	0.0424641	0.266477	0.763	0.673	0.151528
Klf6	0.0425366	-0.211632	0.373	0.613	0.151572
Rnf41	0.0425388	0.234348	0.356	0.173	0.151572
A430005L14Rik	0.042599	0.20221	0.492	0.467	0.151675
Aldh1l1	0.042687	0.142312	0.424	0.333	0.151877
Fam81a	0.0428119	-0.165514	0.712	0.84	0.15221
Cdca7	0.0428599	0.453525	0.237	0.1	0.152269
Atad3a	0.0428992	0.234701	0.695	0.627	0.152297
Spryd7	0.042968	0.188657	0.407	0.26	0.15243
Dnmt3b	0.0430312	0.234531	0.339	0.167	0.152486
Ctnnal1	0.0430677	0.1668	0.542	0.36	0.152486
Spint1	0.0430782	-0.119378	0.678	0.86	0.152486
Maea	0.043208	0.239951	0.729	0.727	0.152834
Mat2b	0.0432753	-0.117773	0.61	0.7	0.152961
Esrp1	0.0434292	0.265015	0.339	0.253	0.153268
Rnf26	0.0434322	0.268122	0.356	0.307	0.153268
Slc4a1ap	0.0434571	-0.184933	0.288	0.493	0.153268
Zfp84	0.0435863	0.173088	0.339	0.293	0.153612
Top1	0.0436702	0.286184	0.881	0.967	0.153797
Cox5a	0.0438768	0.230617	1	1	0.154368
Pik3r2	0.043896	0.174199	0.475	0.313	0.154368
Hsd17b12	0.0439665	0.233436	0.695	0.567	0.154435
Ppp1r2	0.0439789	0.270565	0.678	0.687	0.154435
Crebzf	0.0443108	-0.199208	0.542	0.64	0.155246
Map2k5	0.0443215	0.18367	0.373	0.273	0.155246
Raly	0.044326	0.295693	0.864	0.847	0.155246
Prep	0.0443378	0.230289	0.356	0.307	0.155246
Ppm1g	0.0443723	0.262256	0.712	0.74	0.155255
Exosc1	0.044463	0.161479	0.407	0.313	0.15546
Hddc2	0.0446103	0.218444	0.746	0.687	0.155863
Ube2e1	0.0447089	0.24546	0.678	0.7	0.156095
Eif4e2	0.0447432	0.238485	0.898	0.92	0.156103
Rhcg	0.0449571	0.387004	0.203	0.12	0.156736
Cstf3	0.0450941	0.192095	0.458	0.34	0.157101
Hikeshi	0.0451735	0.234441	0.746	0.693	0.157175
Caskin2	0.0451802	0.191684	0.356	0.193	0.157175
Stx4a	0.0453438	-0.141417	0.339	0.56	0.157554
Msi2	0.045354	-0.122789	0.797	0.907	0.157554
Celf1	0.0453901	0.272588	0.695	0.693	0.157567
Gins2	0.0454682	0.321924	0.305	0.22	0.157629
Adi1	0.0455008	0.223557	0.458	0.44	0.157629
Ap3s1	0.0455055	0.201236	0.475	0.42	0.157629
Cldn8	0.0456697	0.413614	0.39	0.267	0.158085
Ccdc124	0.0457932	0.239951	0.678	0.667	0.1584
Psmb7	0.045915	0.26361	0.797	0.867	0.158707
Samd9l	0.04598	-0.260825	0.254	0.427	0.158729
Myh9	0.0459866	0.217171	0.763	0.673	0.158729
Sipa1l1	0.0460633	0.213517	0.373	0.393	0.158881
Zc3h14	0.0461454	0.215136	0.729	0.74	0.159051
Ccnd2	0.0462235	0.395761	0.508	0.373	0.159207
Gprasp1	0.0464033	0.221188	0.542	0.46	0.159713
Rgl3	0.0465176	0.192095	0.458	0.267	0.159993
Slc25a5	0.0467338	0.211652	1	1	0.160623
Pwwp2a	0.0470094	0.20689	0.441	0.447	0.161455
Pik3ca	0.0470525	0.204859	0.475	0.327	0.161489
Pcmtd2	0.04713	-0.165514	0.39	0.547	0.161607
Ndufc2	0.0471534	0.210592	0.983	0.993	0.161607
Pik3r4	0.0472221	0.22914	0.305	0.213	0.161728
Grhpr	0.0473944	-0.138486	0.797	0.92	0.162204
Tmem29	0.0474716	0.191161	0.39	0.32	0.16222
Ttf1	0.047487	0.163965	0.373	0.233	0.16222
Rassf8	0.0474994	0.143723	0.475	0.313	0.16222
Rsl1d1	0.0475422	0.271232	0.797	0.84	0.162252
Nop58	0.0476711	0.293603	0.763	0.773	0.162578
Emb	0.0480623	-0.162543	0.881	0.893	0.163796
Nup43	0.0482701	0.195934	0.356	0.333	0.164342
Mpv17l	0.04829	-0.301896	0.186	0.367	0.164342
Bud23	0.0483356	0.218598	0.542	0.513	0.164382
Mlec	0.048445	0.262619	0.814	0.847	0.164638
Khdrbs1	0.0484904	0.250422	0.729	0.813	0.164677
Rpa3	0.0485531	0.201336	0.542	0.527	0.164709
Anapc11	0.0485845	0.302622	0.729	0.7	0.164709
Rps7	0.0486015	0.123998	1	1	0.164709
Rps9	0.0486643	0.11045	1	1	0.164768
Igf2bp1	0.0486868	0.23636	0.525	0.48	0.164768
Hnrnpa1	0.0487761	0.245204	0.915	0.973	0.164955
Taf5l	0.0488494	0.202613	0.339	0.227	0.165041
Amd1	0.0489019	0.171631	0.407	0.313	0.165041
Parp2	0.0489083	0.164443	0.475	0.34	0.165041
Fabp3	0.0489376	0.280196	0.746	0.74	0.165041
Fam49b	0.0490522	0.195167	0.559	0.5	0.16511
Cisd2	0.0490917	0.261717	0.763	0.78	0.16511
Med29	0.0490942	0.221697	0.695	0.72	0.16511
B9d1	0.0490942	0.201336	0.559	0.513	0.16511
Ankrd13a	0.0492254	0.166448	0.559	0.447	0.16533
Polr3d	0.0492278	0.244126	0.441	0.393	0.16533
Vps9d1	0.0494385	0.169461	0.356	0.207	0.165923
Terf2	0.0494776	0.182792	0.458	0.327	0.16594
Slc35b4	0.0495453	-0.230755	0.39	0.447	0.165944
Txndc11	0.0495473	0.220719	0.424	0.287	0.165944
Mfap1b	0.0496184	0.148516	0.407	0.307	0.166067
Tspan33	0.0497597	0.239951	0.576	0.473	0.166426
Slc35e2	0.0498211	0.263481	0.373	0.107	0.166457
Cyb5rl	0.0498376	0.214633	0.475	0.34	0.166457
Pfdn2	0.0499268	0.234844	0.831	0.913	0.166569
Cebpz	0.0499398	0.26342	0.661	0.613	0.166569
Atxn7l3b	0.0500342	0.253495	0.915	0.967	0.166769
Rap1gap2	0.0502474	0.206614	0.458	0.367	0.167344
Thg1l	0.0502756	0.168999	0.39	0.333	0.167344
Slit1	0.0503457	0.250313	0.39	0.16	0.167463
Trmt1	0.0504289	0.198513	0.508	0.507	0.167624
Dgcr8	0.0504955	0.206798	0.373	0.167	0.167638
Cdc123	0.050502	0.20221	0.678	0.54	0.167638
Esrra	0.0505532	0.175872	0.542	0.48	0.167693
Gripap1	0.050666	-0.162107	0.475	0.547	0.167952
Cdk5rap2	0.0507391	0.239951	0.339	0.227	0.16808
Psmd2	0.0507882	0.277355	0.814	0.913	0.168128
Myl6	0.0508309	0.239056	0.983	1	0.168154
Rrs1	0.0509276	0.192011	0.475	0.38	0.168359
Atf4	0.0511241	0.242518	0.712	0.633	0.168889
Tmx2	0.0511573	0.22395	0.78	0.787	0.168889
Zc3hc1	0.0512442	0.186926	0.373	0.327	0.16906
Gclc	0.0513554	0.2583	0.576	0.513	0.169312
Upp1	0.0514001	0.353279	0.271	0.267	0.169345
Pdp2	0.0514756	0.20221	0.356	0.193	0.169478
Cep164	0.051556	0.210098	0.559	0.467	0.169628
Sf3a3	0.0518837	0.230066	0.559	0.613	0.170591
Mga	0.0520445	0.196867	0.695	0.553	0.170959
Prps1	0.0520793	0.195499	0.373	0.187	0.170959
Kat7	0.0521015	0.168855	0.356	0.273	0.170959
Cln3	0.052226	-0.173236	0.305	0.487	0.171189
Sh3bgrl3	0.0522421	0.395121	0.763	0.813	0.171189
Hist2h2ac	0.0523434	0.256037	0.305	0.193	0.171405
Ddx27	0.052471	0.221466	0.475	0.5	0.17161
Ndufv2	0.0524767	0.218666	0.949	0.987	0.17161
Gabpa	0.0526266	0.163723	0.492	0.32	0.171896
Atp13a1	0.0526364	0.186366	0.508	0.36	0.171896
Klf2	0.0527241	-0.327484	0.22	0.413	0.171896
Usf1	0.0527323	0.182494	0.356	0.233	0.171896
Pelp1	0.0528064	0.182028	0.458	0.373	0.171896
Sh3glb2	0.0528105	0.196276	0.525	0.387	0.171896
Rpl37a	0.0528201	0.25583	1	1	0.171896
Eaf2	0.0528473	0.218211	0.339	0.187	0.171896
Inpp5f	0.0529374	0.301194	0.339	0.147	0.172073
Sox9	0.0531608	0.341583	0.322	0.133	0.17267
Farp1	0.0531921	0.282842	0.441	0.46	0.17267
Mboat7	0.0533321	0.171548	0.559	0.407	0.173009
Dync2li1	0.0534398	-0.141984	0.542	0.613	0.173242
Tcerg1	0.0535415	0.28251	0.661	0.607	0.173456
Ptdss2	0.0536714	0.196632	0.729	0.74	0.173761
0610009O20Rik	0.0537717	0.181682	0.407	0.313	0.173969
Dbf4	0.0539063	0.263371	0.373	0.267	0.174125
Usp10	0.0539492	0.23273	0.492	0.527	0.174125
Sh3bp1	0.053962	0.151003	0.339	0.253	0.174125
Anapc15	0.0539633	0.159147	0.407	0.327	0.174125
Magi3	0.0540045	-0.2115	0.254	0.407	0.174142
Rpl37	0.0541217	0.289229	0.983	1	0.174356
Uso1	0.0541426	0.187765	0.492	0.38	0.174356
Ddit4l	0.0541998	0.257755	0.305	0.107	0.174424
Tubb2a	0.0543165	-0.173019	0.593	0.653	0.174684
Ilf2	0.054504	0.250422	0.814	0.793	0.175171
Shisa4	0.0546938	-0.265425	0.424	0.513	0.175664
Ctsh	0.0547413	-0.242055	0.288	0.427	0.175701
Saysd1	0.0548584	0.194394	0.492	0.447	0.17596
Fem1b	0.0550667	0.227424	0.458	0.38	0.176468
Pes1	0.055167	0.239951	0.356	0.353	0.176468
2810474O19Rik	0.0551719	0.251999	0.559	0.573	0.176468
Sesn3	0.0551967	-0.197672	0.39	0.473	0.176468
Gspt1	0.0551984	0.277834	0.814	0.78	0.176468
Atp5h	0.0552932	0.200438	1	1	0.176654
Tdg	0.0553642	0.214724	0.576	0.56	0.176765
1810030O07Rik	0.055428	0.185883	0.322	0.207	0.176852
Strn4	0.0555084	0.224202	0.525	0.467	0.176992
Tmem165	0.0557104	0.244327	0.797	0.78	0.177419
Kbtbd11	0.0557248	-0.239301	0.22	0.387	0.177419
Cnpy3	0.055752	0.197226	0.542	0.46	0.177419
Sardh	0.0558226	0.256211	0.322	0.173	0.177528
Trove2	0.0560464	0.248048	0.407	0.4	0.177896
Kif5b	0.0560694	0.227472	0.932	0.947	0.177896
Timm44	0.0560739	0.23114	0.797	0.787	0.177896
Lzic	0.0560849	0.161479	0.458	0.273	0.177896
Capn6	0.0561565	0.203729	0.475	0.393	0.178006
1700011H14Rik	0.0562369	-0.10912	0.729	0.827	0.178091
Ccdc85b	0.0562851	0.218068	0.424	0.373	0.178091
Eef1akmt1	0.0562933	0.212363	0.627	0.593	0.178091
Rala	0.0565417	0.256116	0.864	0.94	0.178529
Mcts2	0.0565641	0.199856	0.424	0.393	0.178529
Atp5o.1	0.0565642	0.207064	1	0.993	0.178529
Zfp385a	0.0565788	0.179933	0.407	0.28	0.178529
Usb1	0.0567921	0.289007	0.305	0.167	0.179085
Tmem55a	0.0569338	0.170958	0.458	0.353	0.179415
Gsk3a	0.0569717	0.19775	0.508	0.413	0.179418
Lrfn3	0.0570699	0.14832	0.407	0.293	0.17952
Tacstd2	0.0570936	0.29284	0.458	0.293	0.17952
Cstb	0.0571503	-0.100087	0.864	0.947	0.17952
Stk40	0.057152	0.201484	0.373	0.287	0.17952
Akirin2	0.0572821	0.201971	0.627	0.613	0.179618
Creld2	0.0573716	0.199677	0.661	0.58	0.179618
Fzd2	0.0573986	0.224683	0.441	0.427	0.179618
Cnot3	0.0574676	0.248004	0.712	0.687	0.179618
Nrf1	0.0575041	0.234862	0.356	0.253	0.179618
Mrps24	0.0575187	0.252507	0.966	0.953	0.179618
Get4	0.057528	0.177708	0.475	0.433	0.179618
Neo1	0.0575349	0.185883	0.407	0.293	0.179618
Fbxo21	0.0575581	0.201851	0.339	0.28	0.179618
Ipo11	0.0575675	0.20073	0.407	0.26	0.179618
Hacd3	0.057607	0.181682	0.441	0.34	0.179618
Ppp1r37	0.0576274	0.184499	0.492	0.453	0.179618
Slbp	0.057805	0.306642	0.593	0.667	0.180056
Rpp21	0.0578978	0.256037	0.729	0.707	0.180129
Cul4a	0.0579026	0.152245	0.61	0.447	0.180129
Vdr	0.0582301	0.208534	0.322	0.187	0.181032
Cyb5b	0.05832	0.250052	0.661	0.733	0.181101
Msantd2	0.058327	0.217478	0.339	0.153	0.181101
Sergef	0.0583768	0.189178	0.339	0.273	0.18114
Tsta3	0.0585146	-0.101799	0.39	0.673	0.181377
Zfp629	0.0585279	0.167847	0.407	0.387	0.181377
Elavl1	0.058625	0.292469	0.695	0.773	0.181562
Cct8	0.0587914	0.20033	0.932	0.947	0.181961
Cystm1	0.058919	-0.217722	0.729	0.9	0.18224
Cops9	0.0590913	0.198721	0.949	0.947	0.182656
Commd7	0.059249	0.215431	0.559	0.54	0.183011
Cul4b	0.0593173	0.188895	0.458	0.327	0.183011
Rcc2	0.0593511	0.254507	0.576	0.62	0.183011
Hspa13	0.0593568	0.182792	0.542	0.427	0.183011
Ggh	0.0594674	-0.150106	0.542	0.653	0.183235
Psma3	0.0595243	0.265703	0.932	0.98	0.183294
Serf2	0.0596849	0.218917	1	1	0.183662
Akr7a5	0.0597196	0.235686	0.831	0.813	0.183662
Dhdds	0.0598977	0.171683	0.39	0.253	0.184093
Uhmk1	0.0599426	0.260785	0.322	0.213	0.184115
Gm17018	0.0599999	0.202909	0.661	0.667	0.184174
Rap1b	0.0601609	0.224153	0.644	0.66	0.184552
Psmc4	0.0602173	0.236555	0.797	0.853	0.184608
Rab7	0.0604259	0.217875	0.831	0.807	0.184957
Hyou1	0.0604298	0.152491	0.356	0.267	0.184957
Gm20604	0.0604455	0.217478	0.305	0.187	0.184957
Nsdhl	0.0605985	0.178707	0.39	0.287	0.185308
Selenot	0.0606734	0.231062	0.814	0.773	0.185337
4930453N24Rik	0.0606841	0.167424	0.542	0.447	0.185337
Ubr7	0.0607289	0.161582	0.39	0.227	0.185357
Ppp2ca	0.0609922	0.195911	0.932	0.94	0.186011
Cct5	0.06102	0.207788	0.915	0.967	0.186011
Eef1g	0.0612376	0.218079	0.898	0.993	0.186557
Sec16a	0.0613507	0.174436	0.356	0.287	0.186743
Tmem52b	0.061389	0.337818	0.661	0.5	0.186743
Cetn2	0.0614139	0.212765	0.78	0.82	0.186743
Paxbp1	0.0616327	0.165227	0.525	0.44	0.187099
Csde1	0.0616715	0.243061	0.814	0.9	0.187099
Grk6	0.0617365	0.217728	0.356	0.18	0.187099
Zfp706	0.0617581	0.22085	0.949	0.933	0.187099
Slc25a3	0.0617645	0.154858	1	1	0.187099
Arl4a	0.0618009	0.174568	0.492	0.34	0.187099
Pggt1b	0.0618437	0.137003	0.339	0.193	0.187099
Atp5f1	0.0618467	0.205338	0.983	0.993	0.187099
Zbtb8os	0.0618781	-0.104554	0.559	0.64	0.187099
Zdhhc5	0.0619237	0.204859	0.373	0.28	0.187121
Sfrp1	0.0619994	0.646679	0.763	0.52	0.187164
Cxxc1	0.0620151	0.193067	0.559	0.427	0.187164
Racgap1	0.0620999	0.522183	0.288	0.113	0.187303
Mcmbp	0.0621773	0.2128	0.424	0.32	0.18742
Nop16	0.062287	0.152939	0.424	0.287	0.187623
Lifr	0.0623219	-0.236973	0.237	0.4	0.187623
Wdr6	0.0626031	0.189092	0.475	0.407	0.188265
Dhrs11	0.0626461	0.163667	0.271	0.16	0.188265
Sorl1	0.0626517	-0.232747	0.576	0.667	0.188265
Ddx3x	0.0627125	0.279691	0.729	0.76	0.188332
Gm13305	0.0627598	-0.243357	0.169	0.38	0.188357
Prss8	0.0629186	-0.12318	0.678	0.827	0.188566
Arhgef17	0.0629271	0.158371	0.458	0.34	0.188566
Pafah1b2	0.0629461	0.213103	0.593	0.547	0.188566
Fbxl5	0.0630534	0.172393	0.407	0.233	0.188737
Golph3	0.0630807	0.185491	0.542	0.507	0.188737
Midn	0.0631325	0.265926	0.492	0.54	0.188775
Poldip2	0.0633809	0.205759	0.797	0.773	0.189401
Nolc1	0.0634734	0.279691	0.525	0.507	0.189561
Grk2	0.0635267	0.207161	0.373	0.327	0.189603
Tmem234	0.063568	0.233217	0.898	0.933	0.18961
Ston2	0.0638329	0.208202	0.508	0.407	0.190283
Hoxd8	0.0639385	0.260396	0.898	0.913	0.19039
Ybx1	0.0640008	-0.133274	1	1	0.19039
Rps29	0.0640085	0.2163	1	1	0.19039
0610010K14Rik	0.0640256	0.197026	0.424	0.433	0.19039
Dut	0.0642058	0.457674	0.661	0.72	0.190809
Gm10639	0.0642977	0.358399	0.203	0.093	0.190952
Cox6b1	0.0643327	0.168852	1	1	0.190952
Phyhipl	0.0643974	-0.197063	0.458	0.54	0.191027
Vkorc1l1	0.0645814	0.147744	0.356	0.207	0.191456
Hspa4	0.0647123	0.214133	0.915	0.9	0.191727
Idh1	0.0648764	0.195855	0.525	0.42	0.192096
Cox7b	0.0650163	0.18672	1	1	0.192393
Canx	0.065106	0.192729	0.898	0.947	0.192465
Tmem260	0.0651268	0.156773	0.424	0.3	0.192465
Vcpip1	0.0651768	0.158273	0.39	0.273	0.192465
Ddx23	0.0651993	0.175133	0.559	0.447	0.192465
Cox7a1	0.0653143	0.14362	0.305	0.22	0.192526
Unc45a	0.0653203	0.184969	0.508	0.42	0.192526
Igf2r	0.0653392	0.203583	0.508	0.493	0.192526
Fktn	0.0657213	0.168999	0.475	0.3	0.193535
Naa15	0.0657885	0.245522	0.678	0.6	0.193538
Atad2	0.0658021	0.433535	0.237	0.213	0.193538
Bhlhe40	0.0658782	-0.204596	0.305	0.453	0.193557
Prdx2	0.0658907	0.178775	1	1	0.193557
Calm3	0.0659768	0.25481	0.881	0.927	0.193557
Wdr83	0.065986	0.173993	0.492	0.393	0.193557
Mcrip1	0.0660315	0.232808	0.847	0.873	0.193557
Hebp2	0.0660478	0.168125	0.39	0.26	0.193557
St14	0.0661796	0.220278	0.644	0.573	0.193684
Scaf1	0.0662197	0.194768	0.475	0.453	0.193684
Srsf4	0.066251	0.223821	0.508	0.36	0.193684
Fkbp10	0.0662749	0.217728	0.305	0.187	0.193684
Mpzl1	0.0662928	0.213633	0.559	0.56	0.193684
Edc4	0.0663306	0.179987	0.322	0.213	0.193684
Yeats2	0.0668028	0.218628	0.407	0.4	0.194945
Sidt2	0.066902	-0.190516	0.22	0.407	0.195117
Acaa2	0.0669685	0.176257	0.983	0.933	0.195153
Rps10	0.0669948	0.118324	1	1	0.195153
P4hb	0.0670773	0.299492	0.831	0.893	0.195276
Cdkn2aipnl	0.0671285	0.271367	0.288	0.207	0.195308
Ltbp3	0.0671837	0.154428	0.271	0.18	0.195352
Polr2c	0.0673595	0.233992	0.78	0.827	0.195621
Aga	0.067403	-0.204354	0.441	0.593	0.195621
Ndufa10	0.0674369	0.161841	0.949	0.96	0.195621
Kmt2a	0.0674373	0.231009	0.661	0.593	0.195621
Rnf103	0.067547	0.133467	0.39	0.253	0.195822
Lgals3	0.0676306	-0.306163	0.712	0.82	0.195904
Rnf34	0.067656	0.152939	0.61	0.493	0.195904
Exosc5	0.067706	0.210963	0.644	0.607	0.195932
Nynrin	0.0678122	0.184799	0.356	0.267	0.196122
Xist	0.0678722	-0.61116	0.22	0.42	0.196179
Ogfod2	0.0679407	0.14086	0.424	0.307	0.19626
Creg1	0.0679912	0.12432	0.627	0.553	0.196289
Ube2k	0.068131	0.241751	0.881	0.787	0.196434
Cuedc1	0.0681495	0.184159	0.424	0.493	0.196434
Fars2	0.068163	-0.140513	0.492	0.613	0.196434
Rsrp1	0.0682844	-0.11391	0.881	0.953	0.196663
1110032A03Rik	0.0683235	0.162815	0.424	0.367	0.196663
Rbbp4	0.0687573	0.237731	0.746	0.773	0.197794
Tjp1	0.0689532	0.199129	0.475	0.393	0.198077
Ndufs4	0.0689672	0.178985	0.915	0.92	0.198077
Gde1	0.068998	0.224393	0.898	0.9	0.198077
M6pr	0.0690506	-0.133254	0.424	0.567	0.198077
Rps5	0.0691092	0.115734	1	1	0.198077
Nup37	0.0691576	0.146619	0.373	0.287	0.198077
Exosc4	0.0691701	0.205464	0.644	0.62	0.198077
Ubap2l	0.0691821	0.297692	0.78	0.893	0.198077
Rab35	0.0692459	0.181357	0.458	0.447	0.198143
Evi5	0.0694274	0.187399	0.576	0.527	0.198545
Sh3d19	0.0694811	0.229479	0.339	0.187	0.198567
Akap1	0.0695169	0.211938	0.339	0.167	0.198567
Cox11	0.070079	0.181507	0.424	0.393	0.200055
Bcl9	0.0702655	0.201891	0.475	0.333	0.200469
Arhgap29	0.070571	-0.160251	0.525	0.6	0.201212
Slc25a32	0.0706086	0.205662	0.288	0.167	0.201212
Nup188	0.0706704	0.24546	0.322	0.14	0.201269
Rab11fip4	0.0707212	0.192323	0.508	0.373	0.201296
Dnmt1	0.0707736	0.405231	0.305	0.233	0.201327
Sem1	0.070824	0.245921	0.949	0.98	0.201352
Pacsin2	0.0709749	0.13357	0.661	0.56	0.201594
Trim32	0.070992	0.206798	0.288	0.2	0.201594
Rad17	0.0710629	0.183043	0.475	0.393	0.201677
Erg28	0.0711907	0.221259	0.61	0.613	0.201775
Clptm1	0.0711957	0.236979	0.61	0.653	0.201775
Nol9	0.0712219	0.211295	0.339	0.173	0.201775
Stard8	0.0713218	0.224913	0.508	0.413	0.201871
Adnp	0.0713392	0.13569	0.373	0.287	0.201871
Mrpl19	0.0714149	0.217222	0.678	0.64	0.201968
Mepce	0.0714598	0.188417	0.373	0.34	0.201977
Usp15	0.0715921	0.220148	0.61	0.587	0.202233
Exoc6	0.0716483	-0.293348	0.102	0.3	0.202274
Eif2s3y	0.0717802	0.153336	0.407	0.253	0.202459
Cbx5	0.0717973	0.261304	0.847	0.873	0.202459
Psmb2	0.0720384	0.230025	0.881	0.92	0.202906
Letm1	0.0720394	0.200832	0.729	0.66	0.202906
Chchd3	0.072089	0.215814	0.898	0.84	0.202928
Kctd10	0.0722007	0.145698	0.322	0.213	0.203125
Igsf8	0.0722667	0.218897	0.559	0.513	0.203182
S100a10	0.0723208	-0.239077	0.508	0.553	0.203182
Cad	0.0723468	0.2767	0.305	0.187	0.203182
Cdc16	0.0725161	0.220278	0.61	0.593	0.20354
Tssc4	0.0726064	0.170958	0.525	0.46	0.203676
Grsf1	0.0730154	0.231114	0.644	0.613	0.204705
Cadm4	0.0731698	0.162564	0.322	0.233	0.204942
Lbp	0.0731844	0.164443	0.373	0.24	0.204942
Tmem72	0.0732332	0.171455	0.729	0.713	0.20496
Gca	0.0734129	-0.165514	0.559	0.633	0.205217
Bmyc	0.0734694	0.21162	0.695	0.667	0.205217
Tuba1b	0.0734889	0.381601	0.864	0.913	0.205217
Ccnk	0.0734941	0.16957	0.373	0.28	0.205217
Ap2s1	0.0736755	0.22668	0.881	0.907	0.205605
N4bp1	0.0737883	0.2195	0.441	0.393	0.205709
Scaper	0.0737976	-0.169383	0.305	0.44	0.205709
Dusp3	0.0739268	0.193233	0.475	0.427	0.205803
Ltbr	0.0739338	0.207862	0.305	0.187	0.205803
Exoc1	0.0739845	0.122168	0.339	0.247	0.205803
Cox7a2	0.0740277	0.216118	1	1	0.205803
Zfp503	0.0740806	0.287241	0.763	0.68	0.205803
Mrpl28	0.0740856	0.239951	0.898	0.88	0.205803
Cant1	0.0742236	0.158161	0.288	0.227	0.206068
Ppp2r5a	0.0743201	-0.144724	0.695	0.753	0.206218
Nme7	0.0743967	-0.160842	0.644	0.74	0.206313
Dpm3	0.0745524	0.245804	0.729	0.813	0.206626
Phf10	0.0745986	-0.104554	0.508	0.62	0.206636
Mpv17l2	0.0747727	0.202679	0.627	0.58	0.207001
Aldh4a1	0.0748667	0.208628	0.39	0.36	0.207143
Mitd1	0.0750012	0.159147	0.407	0.307	0.207199
Nomo1	0.0750127	0.190724	0.407	0.307	0.207199
Cstf2t	0.0750153	0.184799	0.356	0.287	0.207199
Prim1	0.0751424	0.287353	0.339	0.18	0.20738
Nup35	0.0751681	0.212552	0.339	0.187	0.20738
Eif3c	0.0752346	0.232092	0.915	0.94	0.20738
Snx6	0.0752665	0.24921	0.729	0.793	0.20738
Car4	0.0753164	-0.177915	0.508	0.733	0.20738
Ywhag	0.0753372	0.216577	0.593	0.56	0.20738
Gm42418	0.0754434	-0.21254	1	1	0.207478
Vps4b	0.0754582	0.205104	0.576	0.58	0.207478
Ewsr1	0.0756191	0.229406	0.797	0.853	0.207803
Hist1h2ae	0.0756989	0.665457	0.322	0.207	0.207904
Sumo1	0.075855	0.2356	0.847	0.933	0.208215
H2-D1	0.0759011	-0.20443	0.576	0.647	0.208224
Mapk1ip1l	0.0759648	0.194249	0.542	0.56	0.208281
Zfp945	0.0761049	0.170271	0.356	0.287	0.208547
Cpb2	0.0761871	-0.449343	0.085	0.24	0.208655
Tuba1a	0.0762667	0.308513	0.542	0.453	0.208674
Ddx1	0.0762803	0.237741	0.797	0.8	0.208674
BC005624	0.0763342	-0.101909	0.441	0.6	0.208704
Acsl4	0.0764561	0.212765	0.542	0.427	0.208856
Gpbp1l1	0.0765012	-0.158957	0.475	0.573	0.208856
Gm10073	0.0765384	0.173811	0.458	0.467	0.208856
Gtf2e2	0.0765619	0.193597	0.627	0.527	0.208856
Ccm2	0.076613	0.217728	0.305	0.187	0.208878
Asns	0.0766567	0.200059	0.271	0.173	0.20888
Lad1	0.0767261	0.183438	0.271	0.193	0.208947
Xpot	0.0767676	0.14832	0.39	0.32	0.208947
Lsm4	0.0768141	0.264522	0.864	0.933	0.208957
Chp1	0.0769512	0.128477	0.458	0.34	0.209212
Etfrf1	0.0770473	0.170425	0.508	0.453	0.209356
Rnf10	0.0771064	0.177523	0.644	0.613	0.2094
Ubald2	0.0774481	0.270913	0.559	0.62	0.21021
Dcbld1	0.0775929	0.207862	0.339	0.2	0.210485
Mycbp	0.0779611	0.174353	0.61	0.46	0.211366
Dcbld2	0.0780407	-0.270875	0.356	0.413	0.211464
Clec18a	0.078322	0.28608	0.356	0.273	0.212107
Slc24a5	0.0785698	-0.169017	0.373	0.473	0.212433
Mtx2	0.0785797	0.242812	0.847	0.927	0.212433
2022-09-06	0.0786383	0.192095	0.339	0.327	0.212433
Ergic2	0.0787603	0.24673	0.729	0.787	0.212433
Rpl23	0.0787688	0.122827	1	1	0.212433
Med4	0.0787738	0.18965	0.492	0.447	0.212433
Sec23a	0.0787879	0.191161	0.339	0.207	0.212433
Pan2	0.0788159	0.239951	0.339	0.12	0.212433
Arfgap2	0.078836	0.174353	0.525	0.44	0.212433
Synrg	0.0789437	0.186841	0.407	0.36	0.212522
Nup50	0.0789566	0.18965	0.525	0.46	0.212522
Camk2d	0.0790318	0.174507	0.678	0.72	0.212606
Bcl9l	0.0791248	0.137821	0.39	0.28	0.212644
Kif3a	0.0791335	-0.140973	0.492	0.58	0.212644
Cops8	0.0792063	0.17889	0.576	0.553	0.212722
Psmd4	0.079355	0.221602	0.864	0.94	0.212767
Tsr1	0.079385	0.196466	0.305	0.207	0.212767
Arf1	0.0793873	0.226508	0.932	1	0.212767
Pcna	0.0794005	0.261457	0.305	0.16	0.212767
Smarcc1	0.0794425	0.258999	0.695	0.713	0.212767
Rad54l2	0.0795462	0.182494	0.407	0.227	0.212928
Gpd1l	0.079857	0.170217	0.305	0.247	0.213625
Bag3	0.0798946	0.187028	0.305	0.22	0.213625
Wdr46	0.0799574	0.14832	0.441	0.333	0.213675
Smim20	0.0800363	0.211332	0.644	0.593	0.21369
Ankrd28	0.0800512	0.162392	0.356	0.26	0.21369
Slc39a9	0.0803397	0.209798	0.356	0.233	0.214342
Hint3	0.0804133	-0.165514	0.373	0.467	0.214375
Tfam	0.0804663	0.20221	0.695	0.62	0.214375
Ints3	0.0804843	0.17715	0.475	0.38	0.214375
Bccip	0.0805921	0.205082	0.627	0.58	0.214544
Crtap	0.0806667	0.175133	0.475	0.393	0.214625
H3f3b	0.0807852	0.356393	0.983	1	0.214822
Rnf13	0.0808981	-0.141165	0.407	0.54	0.215005
Bcam	0.0810797	0.305369	0.797	0.867	0.21527
Slc4a2	0.0810887	0.20221	0.559	0.607	0.21527
Smap2	0.0811311	0.165475	0.39	0.32	0.21527
Eif1a	0.0813881	0.235289	0.746	0.693	0.215834
Naa38	0.0816142	0.234963	0.746	0.773	0.216315
Gatad2a	0.0816879	0.201236	0.424	0.353	0.216393
Rpa1	0.0821177	0.18367	0.339	0.247	0.217413
Rbmx	0.082336	0.25094	0.712	0.613	0.217872
Armcx3	0.0823956	-0.145712	0.424	0.567	0.217911
Tet2	0.0828078	-0.185717	0.424	0.54	0.218881
Uchl1	0.0828649	0.207764	0.441	0.28	0.218889
Bloc1s2	0.0829009	0.165843	0.508	0.453	0.218889
Trp53i13	0.0830099	0.140321	0.424	0.38	0.219058
Tstd2	0.0831506	0.156337	0.339	0.193	0.21931
Usp5	0.0832504	0.170357	0.424	0.387	0.219454
Rai1	0.0833813	0.165475	0.407	0.267	0.219525
Malat1	0.0834193	-0.501751	1	1	0.219525
Ddx10	0.0834375	0.143843	0.508	0.42	0.219525
Atp13a2	0.0834582	0.166164	0.492	0.44	0.219525
2810001G20Rik	0.0835358	0.145541	0.458	0.36	0.219598
Ppt2	0.0835767	0.194488	0.525	0.467	0.219598
Wdr82	0.0840369	0.18254	0.424	0.353	0.220593
Mrpl13	0.0840461	0.237878	0.746	0.82	0.220593
Arfip2	0.0840944	0.191882	0.542	0.56	0.2206
Sec63	0.0845596	0.194694	0.678	0.613	0.221536
Basp1	0.0845664	-0.245027	0.373	0.447	0.221536
Ankrd37	0.0845883	-0.165514	0.271	0.42	0.221536
Cinp	0.0849512	0.191161	0.305	0.207	0.222268
Tmem39a	0.0849591	0.156337	0.339	0.2	0.222268
Nudt4	0.085044	-0.110984	0.983	0.98	0.22237
Plcl1	0.0852619	0.268771	0.288	0.113	0.22271
Nfrkb	0.085297	0.149196	0.441	0.313	0.22271
Ndufs2	0.0853118	0.122949	0.983	1	0.22271
Tubb5	0.0854595	0.546255	0.864	0.94	0.222948
Kcp	0.0854947	0.152939	0.305	0.187	0.222948
Kpna3	0.0856147	0.196778	0.339	0.32	0.223141
Thap11	0.0857999	0.181682	0.525	0.487	0.223503
Uhrf1	0.0859789	0.316738	0.288	0.28	0.223774
Uck2	0.085996	0.187929	0.356	0.34	0.223774
E2f3	0.0861096	0.154793	0.339	0.227	0.223859
Msl2	0.0861207	0.205208	0.373	0.247	0.223859
Setd6	0.0862032	0.22204	0.288	0.113	0.223953
Golt1b	0.0862898	0.234086	0.288	0.127	0.224058
Ifrd2	0.0863695	0.160701	0.373	0.287	0.224121
Uqcrfs1	0.0864064	0.142034	0.949	0.987	0.224121
Smc6	0.0865126	0.266153	0.763	0.74	0.224276
Abhd14a	0.086789	-0.111447	0.525	0.627	0.224873
Dda1	0.0872085	0.187108	0.458	0.507	0.225839
Mphosph6	0.0873179	0.142495	0.593	0.52	0.225852
Smarcd2	0.0873185	0.150339	0.424	0.34	0.225852
Spred2	0.0873529	0.159044	0.339	0.207	0.225852
Ctsf	0.0874356	-0.184009	0.492	0.673	0.225945
Rlf	0.087528	-0.178376	0.458	0.52	0.226064
Tlnrd1	0.0877043	0.200949	0.322	0.193	0.226334
Swt1	0.0877261	-0.110164	0.627	0.687	0.226334
Ogfrl1	0.0878009	0.259832	0.475	0.347	0.226407
Wdr12	0.0878618	0.221735	0.492	0.48	0.226444
Nfatc4	0.0880376	0.206798	0.322	0.18	0.226716
Gale	0.088061	0.162815	0.441	0.32	0.226716
Ddx47	0.088147	0.18965	0.542	0.447	0.226736
Hmg20b	0.0881875	0.224167	0.746	0.8	0.226736
Sdr39u1	0.0882517	0.147169	0.424	0.38	0.226736
Klhdc4	0.0882555	0.158371	0.39	0.327	0.226736
G6pc3	0.0885972	0.154119	0.475	0.393	0.227318
Atp5l	0.0886455	0.173073	1	1	0.227318
Apbb1	0.0886505	0.169819	0.576	0.42	0.227318
Wdr61	0.0886696	0.199568	0.695	0.7	0.227318
Nkiras1	0.0888314	0.130751	0.339	0.287	0.227584
Myo9a	0.0888873	-0.126294	0.373	0.487	0.227584
Fen1	0.0889141	0.326962	0.305	0.127	0.227584
Ctdnep1	0.0891311	0.22353	0.542	0.533	0.227976
Fbxo22	0.0892022	0.214541	0.492	0.507	0.227976
Pigf	0.0892081	0.1773	0.525	0.447	0.227976
Yars	0.0893175	0.169746	0.458	0.393	0.228136
Rwdd4a	0.0894386	0.196056	0.695	0.593	0.228276
Proser1	0.0894945	0.170357	0.458	0.413	0.228276
Mat2a	0.0895136	0.265044	0.729	0.733	0.228276
Rhobtb2	0.0896098	0.201378	0.305	0.173	0.228402
Wrap73	0.0897082	0.186462	0.322	0.253	0.228532
Wnt7b	0.0897573	-0.367218	0.153	0.38	0.228537
Phf21a	0.089923	-0.147232	0.339	0.46	0.228733
Rcn1	0.0899475	0.203393	0.729	0.667	0.228733
Hsbp1	0.0899754	0.229507	0.864	0.96	0.228733
Cdc42	0.0900905	0.198809	0.932	0.993	0.228849
Lrch1	0.0901156	0.192196	0.339	0.193	0.228849
Pnkp	0.0902327	0.136766	0.356	0.327	0.22894
Fam58b	0.0902456	0.177647	0.644	0.527	0.22894
Cenpe	0.0903146	0.509138	0.305	0.133	0.228995
Psmd11	0.090505	0.220148	0.864	0.867	0.229358
Thoc5	0.0908375	0.142787	0.424	0.307	0.230081
Ctdsp2	0.0909979	0.220902	0.61	0.607	0.230367
Kpna2	0.0912607	0.263481	0.305	0.093	0.230912
Ints7	0.0913427	0.201484	0.39	0.267	0.230999
Camta1	0.0914409	-0.128735	0.559	0.553	0.231126
Memo1	0.0915874	0.179886	0.424	0.333	0.231259
Snx9	0.0916436	-0.103639	0.339	0.54	0.231259
Smarca5	0.0916591	0.2431	0.797	0.893	0.231259
Exoc7	0.0917046	0.198513	0.542	0.5	0.231259
Glyr1	0.0917315	0.208831	0.712	0.667	0.231259
Stx7	0.0917993	0.220321	0.797	0.847	0.231309
Ubxn8	0.0919599	0.123417	0.339	0.253	0.231594
Cox6c	0.0920985	0.194791	0.983	1	0.231823
Acp1	0.0923441	0.221188	0.797	0.88	0.23232
Lrfn4	0.092509	0.154793	0.356	0.253	0.232482
Marf1	0.0925287	0.174199	0.407	0.367	0.232482
Fkrp	0.0925886	-0.120757	0.356	0.58	0.232482
Asph	0.0926334	0.152635	0.576	0.5	0.232482
Aimp2	0.0926927	0.188279	0.525	0.513	0.232482
Dusp12	0.0926956	0.163965	0.339	0.3	0.232482
Ckmt1	0.0929581	0.239951	0.559	0.52	0.23302
Rmdn3	0.0931832	0.13569	0.407	0.3	0.233463
Prrc2a	0.0933241	0.252788	0.593	0.653	0.233581
Abr	0.0933655	0.185883	0.322	0.233	0.233581
Col4a5	0.0933914	-0.11389	0.475	0.527	0.233581
Camsap1	0.0934229	0.17743	0.356	0.28	0.233581
Cpsf3	0.0936032	0.16763	0.542	0.453	0.233912
1700019D03Rik	0.0938517	0.337325	0.22	0.1	0.234412
Bcl7c	0.0939531	0.210598	0.831	0.82	0.234544
Tmed2	0.0942065	0.235746	0.864	0.913	0.235056
Prpf8	0.09429	0.209737	0.627	0.6	0.235144
Bud31	0.094361	0.185537	0.695	0.62	0.235168
Serp1	0.0943969	0.177508	0.864	0.727	0.235168
Ptcd1	0.0944774	0.151397	0.305	0.16	0.235211
Utp20	0.094511	0.229255	0.305	0.18	0.235211
Rpl7l1	0.0946677	0.23005	0.746	0.733	0.235481
Zfp593	0.0947826	0.160701	0.39	0.3	0.235646
Cpsf6	0.0948876	0.218328	0.797	0.693	0.235786
Fahd1	0.095075	0.171309	0.729	0.733	0.23613
Msh2	0.095249	0.197391	0.627	0.56	0.236442
Ech1	0.0954496	0.130227	0.881	0.847	0.23676
Cpxm1	0.0956275	0.190079	0.271	0.2	0.23676
Slc25a39	0.0956401	0.204941	0.932	0.927	0.23676
Pmm2	0.0956579	0.138481	0.492	0.4	0.23676
Rita1	0.09569	0.117348	0.322	0.3	0.23676
Uimc1	0.0957368	0.169664	0.373	0.353	0.23676
Tubg1	0.0957448	0.235758	0.441	0.367	0.23676
Ung	0.0957675	0.343135	0.237	0.187	0.23676
Rpa2	0.0959	0.309312	0.305	0.147	0.236769
Bbip1	0.0959057	0.222856	0.729	0.687	0.236769
Rrp1b	0.0959176	0.186841	0.424	0.34	0.236769
Uchl5	0.0961024	0.185883	0.559	0.5	0.237105
Dhx40	0.0962483	0.158535	0.441	0.387	0.237297
Agtrap	0.09628	-0.133563	0.492	0.547	0.237297
Mvd	0.0963272	0.128159	0.356	0.32	0.237297
Adam17	0.0964499	0.1668	0.475	0.427	0.237479
Rps27rt	0.0965316	-0.195367	0.22	0.387	0.23756
Bloc1s1	0.0966558	0.159044	0.339	0.24	0.237697
Sucla2	0.0966851	0.19216	0.831	0.84	0.237697
Socs2	0.0967861	0.243895	0.492	0.347	0.237824
Tspan15	0.0969228	0.222251	0.254	0.113	0.238006
Ap3m1	0.096958	0.152089	0.407	0.313	0.238006
Pard6b	0.0970276	-0.107407	0.508	0.587	0.238056
Utp6	0.0974468	0.192698	0.356	0.233	0.238905
Celsr2	0.0974722	0.218897	0.542	0.487	0.238905
Cul5	0.0979322	0.233834	0.61	0.573	0.239811
Fbxo7	0.0979876	0.10933	0.356	0.253	0.239811
Pygo2	0.0980226	0.182131	0.305	0.153	0.239811
Lrrfip1	0.0980436	0.164811	0.695	0.64	0.239811
Cnot7	0.0980888	0.166388	0.542	0.533	0.239811
Csnk2b	0.098192	0.2468	0.797	0.9	0.239943
Tbl1x	0.0983754	0.215658	0.712	0.667	0.24027
Reps1	0.0985302	0.191161	0.339	0.3	0.240527
2310035C23Rik	0.098643	0.120999	0.373	0.327	0.240681
B2m	0.0987192	-0.176444	0.322	0.453	0.240746
Ube3b	0.0988061	0.153383	0.407	0.253	0.240837
Scyl1	0.0989001	0.150899	0.441	0.36	0.240945
Zfp942	0.0989618	0.156337	0.305	0.207	0.240974
Mdk	0.0992542	0.4922	0.729	0.7	0.241476
Ndufa4	0.0992676	0.211292	1	1	0.241476
Tagln2	0.0994633	0.239951	0.678	0.573	0.241537
Coq2	0.0994897	0.192804	0.61	0.573	0.241537
Iars	0.0995324	0.177819	0.475	0.44	0.241537
2610528J11Rik	0.0995581	0.212995	0.661	0.58	0.241537
[truncated: 2,867 more rows]

## Sheet: N.tubule3_IM1.MutVsCTRL.DEGs
Gene	p_val	avg_logFC	pct.1	pct.2	p_val_adj
Rpl29	1.13917e-20	-0.138396	1	1	8.91176e-17
Rps2	4.40446e-18	0.615371	1	1	1.7228e-14
Gm10260	2.88297e-17	2.19291	0.652	0.05	7.51782e-14
Uba52	9.45483e-17	0.785933	0.978	0.958	1.84913e-13
Rpl21	3.59409e-14	0.127704	1	0.992	5.62332e-11
Hist3h2ba	2.55888e-13	1.05534	0.87	0.319	3.33635e-10
Smarca4	5.18167e-12	1.00764	0.696	0.403	5.79089e-09
Hist1h2ap	8.09497e-12	1.36273	0.804	0.706	7.91586e-09
Gnai2	7.14963e-10	0.809491	0.957	0.95	6.21462e-07
Eif3j1	2.4487e-09	0.80907	0.87	0.613	1.91562e-06
Oaz1	3.9187e-09	0.670897	1	1	2.78691e-06
Prdx4	4.4425e-09	0.744384	0.891	0.748	2.89614e-06
Ptma	5.57568e-09	0.627515	1	1	3.35528e-06
Hsp90b1	6.71745e-09	0.723847	0.978	0.983	3.75361e-06
Hmgn2	2.32741e-08	0.819596	0.957	0.899	1.21382e-05
Chga	2.89323e-08	-1.78465	0.087	0.361	1.41461e-05
Rps21	3.91176e-08	0.479146	1	1	1.8001e-05
Ap3s1	6.14796e-08	0.664526	0.761	0.462	2.52875e-05
Serpinh1	6.44535e-08	0.78127	0.978	0.958	2.52875e-05
H2afy2	6.4649e-08	0.746883	0.913	0.773	2.52875e-05
Rplp0	8.4563e-08	0.122647	1	1	3.15017e-05
Gm10036	1.02752e-07	-0.356006	0.522	0.731	3.65378e-05
Pebp1	2.12751e-07	0.544478	1	1	7.2363e-05
Siva1	2.74824e-07	0.801927	0.957	0.908	8.85867e-05
Pdia6	2.8867e-07	0.637378	0.978	0.992	8.85867e-05
Erh	2.94421e-07	0.669113	0.935	0.924	8.85867e-05
H2afz	3.42285e-07	0.865175	0.978	0.983	9.91738e-05
Sfrp2	6.01953e-07	1.15931	0.63	0.311	0.000168181
Atp5k	6.72685e-07	0.60444	1	0.992	0.000179336
Ppia	6.87728e-07	0.571438	1	1	0.000179336
Arl3	8.24611e-07	0.709576	0.913	0.832	0.000208095
Txndc5	1.14441e-06	0.651239	0.87	0.672	0.000279773
Gm10076	1.29665e-06	0.64497	0.891	0.899	0.000307384
Ubc	1.38083e-06	-0.107174	1	0.992	0.000317712
Atp5g3	1.58355e-06	0.643626	1	0.975	0.000352728
Rbm3	1.62319e-06	0.580735	1	0.992	0.000352728
Marcks	1.76942e-06	0.881489	0.848	0.782	0.000374114
Vcam1	2.57621e-06	-0.774812	0.565	0.647	0.000530361
Fkbp4	2.78395e-06	0.548137	0.978	0.975	0.000558432
Tra2b	2.9487e-06	0.651668	0.935	0.891	0.000576693
Ndufa5	3.20627e-06	0.653717	0.935	0.908	0.000611771
Hmgn1	3.49453e-06	0.599872	1	0.983	0.000650898
Baz1b	3.62559e-06	0.671769	0.783	0.681	0.000656361
Tmem176a	3.69167e-06	-0.536417	0.848	0.933	0.000656361
Sostdc1	4.26457e-06	-0.951122	0.283	0.454	0.000741373
Sumo3	4.7195e-06	0.587577	0.935	0.756	0.000802623
Tpm3-rs7	4.84176e-06	0.681669	0.609	0.118	0.000805896
Pomp	6.38997e-06	0.551096	0.978	0.975	0.00103257
Ndufb5	6.46757e-06	0.573398	1	0.975	0.00103257
Tcf4	7.241e-06	0.65277	0.826	0.731	0.00113293
Ifitm2	8.38249e-06	0.792493	0.957	0.849	0.00128581
Rps13	9.0129e-06	0.209686	1	1	0.00133826
Golim4	9.0666e-06	0.917146	0.652	0.563	0.00133826
Rnf187	9.44512e-06	0.614403	0.957	0.874	0.00135177
Ivns1abp	9.61238e-06	-0.214781	0.935	0.941	0.00135177
Ptov1	9.68914e-06	0.66071	0.978	0.983	0.00135177
Med28	9.84931e-06	0.758846	0.848	0.874	0.00135177
Osbpl1a	1.10914e-05	0.740564	0.609	0.286	0.001496
Phyhipl	1.14429e-05	-0.432234	0.37	0.546	0.00151725
Pecr	1.23112e-05	-0.332134	0.5	0.681	0.00160517
Timp2	1.33876e-05	0.786998	0.913	0.63	0.0017169
P4hb	1.36816e-05	0.680432	0.891	0.882	0.00171755
Atp5e	1.38317e-05	0.583426	1	0.992	0.00171755
Mrfap1	1.51562e-05	0.546043	0.957	0.983	0.00185261
Mplkip	1.59238e-05	-0.225422	0.652	0.739	0.0019165
Smc3	1.6355e-05	0.658311	0.891	0.866	0.00193856
Alad	1.77298e-05	-0.210373	0.63	0.815	0.00204812
Stmn1	1.78029e-05	0.812927	1	0.941	0.00204812
Tmem258	1.93137e-05	0.550601	0.978	0.941	0.00218972
Slc25a4	2.04513e-05	0.628863	1	0.992	0.00227043
Trim35	2.0606e-05	0.6687	0.891	0.782	0.00227043
Hnrnpd	2.12281e-05	0.582261	0.957	0.966	0.00230649
Dek	2.16451e-05	0.740704	0.891	0.933	0.00231958
Sec61b	2.3782e-05	0.592777	1	0.975	0.00249769
Fbln1	2.39456e-05	0.6628	0.674	0.361	0.00249769
Mmp14	2.48718e-05	0.713838	0.783	0.571	0.00256016
H19	2.63978e-05	2.20434	0.826	0.538	0.00268195
Mprip	3.04445e-05	0.602795	0.761	0.664	0.00305343
Hmgb2	3.30312e-05	0.953214	0.913	0.874	0.00326295
Gsta4	3.33678e-05	-0.146083	0.565	0.798	0.00326295
Cox5b	3.42171e-05	0.664196	1	1	0.00330469
Sfpq	3.69471e-05	0.574174	0.978	0.933	0.00352485
Lrfn4	3.75549e-05	0.56482	0.543	0.21	0.00353966
Abhd14a	3.93047e-05	-0.259626	0.717	0.798	0.00366048
Cald1	4.12146e-05	1.36175	0.826	0.513	0.0037932
Wt1	4.31586e-05	1.14441	0.674	0.378	0.00392593
Rsbn1l	4.38927e-05	0.564138	0.783	0.689	0.00394681
Fth1	4.52427e-05	0.713408	1	0.983	0.00402198
Fxyd6	5.0431e-05	0.757465	0.543	0.303	0.00438788
Marcksl1	5.04805e-05	0.627173	0.913	0.975	0.00438788
Rcn3	5.21282e-05	0.6628	0.957	0.655	0.00448131
Mcmdc2	5.38938e-05	-0.439429	0.348	0.504	0.00458273
mt-Nd3	5.93317e-05	0.617974	0.978	0.983	0.00499088
Zfp516	6.12916e-05	0.574939	0.696	0.479	0.00507389
Ap2a2	6.16156e-05	-0.130662	0.739	0.866	0.00507389
Cggbp1	6.36765e-05	0.616063	0.783	0.714	0.00518897
Hmgn3	6.87962e-05	0.580883	0.609	0.361	0.00554062
Bdh2	6.94082e-05	-0.250456	0.348	0.672	0.00554062
St3gal6	7.25572e-05	0.487512	0.696	0.303	0.00568846
Rps25	7.27146e-05	0.118183	0.978	0.992	0.00568846
Exosc10	7.51587e-05	0.520626	0.63	0.336	0.00582145
mt-Nd4	8.1448e-05	0.628019	1	1	0.00621679
Col1a1	8.18521e-05	1.09358	0.391	0.328	0.00621679
H3f3b	8.4107e-05	0.640867	0.978	1	0.00629413
Rbp1	8.44796e-05	0.91733	0.935	0.706	0.00629413
mt-Cytb	8.55015e-05	0.642962	1	0.992	0.00631017
Maged1	8.85419e-05	0.585022	0.978	0.95	0.00647348
Khdrbs3	8.98315e-05	0.661124	0.609	0.387	0.00650696
Fabp5	9.54968e-05	0.841892	0.739	0.513	0.00685387
Aldh1a2	9.79655e-05	-0.313386	0.913	0.941	0.00696713
Col1a2	0.000100114	1.04803	0.63	0.345	0.00705579
Rps23	0.000106778	0.185272	1	1	0.0074353
Arid5b	0.0001074	-0.152792	0.826	0.908	0.0074353
Mdh1	0.00011105	0.590543	0.978	0.975	0.00757048
Anxa6	0.000111288	0.669445	0.565	0.412	0.00757048
Mfap2	0.00011242	0.715168	0.522	0.345	0.00758155
Lsp1	0.000125245	1.53328	0.652	0.479	0.00832332
C1qtnf12	0.000125547	0.898231	0.717	0.521	0.00832332
Fyn	0.000127418	0.591974	0.543	0.269	0.00837638
Tuba1b	0.000131145	0.658702	0.957	0.908	0.00854953
Tmem176b	0.000142734	-0.343652	0.935	0.95	0.00922814
Rpl18a	0.000145547	0.204415	1	1	0.00933292
Hspa5	0.000147977	0.584532	1	0.975	0.00941161
Ctdspl	0.000155075	0.734824	0.87	0.681	0.00978351
Ciapin1	0.000162299	0.563709	0.87	0.622	0.0101573
Tra2a	0.000170102	0.618298	0.913	0.933	0.0105612
Rpl5	0.000172072	0.108622	1	1	0.0105994
Fgfrl1	0.000177474	0.505575	0.609	0.361	0.0108467
Sumo2	0.000184009	0.514318	0.957	0.992	0.0111589
Uqcr11	0.000189533	0.558278	1	0.983	0.0114055
Phactr1	0.000192554	0.630175	0.478	0.118	0.0114988
Ube2c	0.000196468	0.89019	0.565	0.328	0.0116009
Rpl27a	0.000197229	0.211793	1	1	0.0116009
Neu1	0.000199521	-0.265913	0.391	0.597	0.0116481
Pcbp4	0.00020442	0.605642	0.891	0.664	0.0118458
Nap1l4	0.000207976	0.54787	0.87	0.807	0.0119632
Hdgfl3	0.000214328	0.550683	0.565	0.294	0.0122386
Rab18	0.00021831	-0.139866	0.717	0.882	0.0123757
H2-K1	0.000221903	-0.560784	0.391	0.487	0.0124888
Hnrnpab	0.000227425	0.545581	0.935	0.975	0.0127082
Ogdh	0.000244335	0.596048	0.696	0.353	0.0135563
Mrpl27	0.000248559	0.507629	0.761	0.546	0.0136935
Uqcrq	0.000263022	0.59474	0.957	0.958	0.014389
Lmnb1	0.000265659	0.611754	0.826	0.756	0.0144323
Sec61g	0.000273785	0.51716	0.978	0.975	0.0147712
Ndufa4	0.000277899	0.557358	0.978	0.983	0.0148045
H2-D1	0.000278187	-0.471357	0.261	0.563	0.0148045
Mafg	0.000285675	0.628399	0.739	0.613	0.0150362
Cmtm7	0.000286386	0.763271	0.783	0.487	0.0150362
Mrpl18	0.000290261	0.563709	0.935	0.924	0.0151381
Rpn1	0.000312397	0.551152	0.87	0.79	0.0161847
Rpl41	0.000317942	0.449892	1	1	0.0162806
Wnk1	0.000318411	0.614681	0.804	0.672	0.0162806
mt-Nd1	0.000335679	0.608351	1	1	0.0169814
Rrbp1	0.000336458	0.628948	0.891	0.899	0.0169814
Ubb	0.000361919	0.617713	1	1	0.0180839
Scg5	0.000362926	0.520752	0.478	0.185	0.0180839
Hnrnpm	0.000366594	0.509466	0.913	0.95	0.018151
Paf1	0.000373605	0.521895	0.63	0.353	0.0183818
Rps14	0.000382678	0.181165	1	1	0.0186381
Hirip3	0.00038412	0.517412	0.696	0.429	0.0186381
Tspan3	0.000385961	0.542281	0.957	0.899	0.0186381
Psip1	0.000394617	0.615891	0.935	0.899	0.0189392
Atp5j2	0.000399068	0.534104	0.935	0.992	0.019036
Ccdc136	0.000410601	0.507147	0.587	0.202	0.0194675
Fubp1	0.000426056	0.552734	0.978	0.916	0.01992
Nxf1	0.000427773	0.557959	0.891	0.933	0.01992
Anp32e	0.000427786	0.581922	0.804	0.756	0.01992
Rex1bd	0.000434365	0.591793	0.87	0.748	0.0201067
Ier5l	0.000446337	-0.219306	0.587	0.689	0.0205394
Gpc4	0.000468305	-0.22672	0.522	0.681	0.0214076
Atp5c1	0.000470677	0.49562	0.978	0.975	0.0214076
Gpx4	0.000476812	0.617254	0.978	0.975	0.0215613
Pcp4	0.000485032	0.920629	0.717	0.345	0.0218069
Slc3a2	0.000489418	0.638999	0.848	0.739	0.0218784
Med16	0.000494832	0.505575	0.565	0.378	0.0219947
Clec18a	0.000498436	0.70902	0.826	0.479	0.0220297
Fgfr1	0.000508741	0.680819	0.609	0.437	0.0223589
Tead2	0.00051616	0.548769	0.826	0.807	0.0224877
Mcee	0.000521817	0.535627	0.87	0.807	0.0224877
Tcf3	0.000522486	0.515164	0.87	0.748	0.0224877
Prss12	0.00052317	-0.362278	0.217	0.462	0.0224877
Wdr89	0.000528733	-0.169184	0.522	0.664	0.0226026
Ndufa11	0.000534362	0.584431	0.913	0.95	0.0226132
Fdft1	0.000534763	0.466545	0.587	0.252	0.0226132
Hist1h2ae	0.000586817	0.636825	0.565	0.462	0.024681
Ucp2	0.000592602	0.993711	0.696	0.454	0.0247699
Ndufa10	0.000595264	0.501091	0.913	0.899	0.0247699
Sart3	0.000602591	0.451491	0.717	0.412	0.0249422
Ankrd10	0.00060785	0.492649	0.717	0.58	0.0250274
H1fx	0.000624678	0.873623	0.826	0.597	0.0255856
Rpl13	0.000636184	0.254666	1	1	0.0259212
Mt1	0.00065015	-0.7415	0.413	0.471	0.026353
Zeb2	0.000658261	0.747018	0.652	0.479	0.0265442
Fbn2	0.00066198	0.618042	0.587	0.328	0.0265573
Ndufc2	0.000667722	0.485289	1	0.975	0.026651
Nnat	0.000675088	0.677838	0.565	0.227	0.026763
Btbd7	0.000677372	0.591624	0.804	0.588	0.026763
H3f3a	0.000680886	0.488416	1	1	0.0267667
Cacybp	0.00068459	0.49061	0.935	0.908	0.0267777
H2afx	0.000695888	0.716489	0.739	0.58	0.0270843
Rras	0.000700265	-0.367901	0.413	0.546	0.0271197
Csnk2b	0.000713689	0.501123	0.957	0.899	0.0274772
Tia1	0.000716521	0.575544	0.87	0.714	0.0274772
Paqr5	0.000739749	-0.362278	0.217	0.487	0.0281633
AC160336.1	0.000744771	0.580024	0.826	0.723	0.0281633
Ssr3	0.000745213	0.554586	0.826	0.723	0.0281633
Ints6	0.00076052	0.460934	0.674	0.412	0.0286036
Xbp1	0.000769586	0.6175	0.696	0.605	0.0288061
Pabpn1	0.000775034	0.57742	0.826	0.756	0.0288719
Rida	0.000779166	-0.189426	0.783	0.924	0.0288882
Ddx39b	0.000788517	0.517856	0.957	0.958	0.029097
Dbp	0.000805153	-0.244358	0.283	0.521	0.0295714
BC005537	0.000851316	0.56431	0.739	0.538	0.0309934
Pja1	0.000851794	0.490623	0.804	0.647	0.0309934
Gas1	0.000872127	0.717941	0.674	0.546	0.031375
D8Ertd738e	0.000876907	0.556525	0.978	0.908	0.031375
Fdps	0.00087791	0.592771	0.696	0.613	0.031375
Aebp1	0.000881454	0.81346	0.522	0.218	0.031375
Gstp1	0.000882333	0.536614	0.761	0.529	0.031375
H2afv	0.000895607	0.671801	0.957	0.966	0.0317029
Ncam1	0.000916187	0.848165	0.957	0.874	0.0322853
Nktr	0.000925024	0.624334	0.826	0.832	0.0324505
Rpl23	0.000936618	0.242179	1	1	0.0327105
Elovl6	0.000993682	0.549141	0.739	0.546	0.0345492
Lims1	0.00100251	0.568957	0.587	0.504	0.0347019
Hoxa9	0.0010393	0.556578	0.739	0.58	0.0357668
Cdk4	0.00104594	0.504816	0.957	0.966	0.0357668
Usp50	0.00104699	0.542476	0.609	0.437	0.0357668
Mfge8	0.00105288	0.90065	0.783	0.555	0.0358117
Nsdhl	0.00108051	0.444062	0.522	0.227	0.0365923
Wdfy1	0.00110239	0.473558	0.543	0.345	0.0370809
Ndufa13	0.00110442	0.517693	0.957	0.975	0.0370809
Ndufa12	0.00114743	0.487239	0.957	0.975	0.0381376
Nrbp1	0.00114764	0.549192	0.717	0.563	0.0381376
Rpl17	0.00115285	0.210162	1	1	0.0381376
Rest	0.00115539	0.53337	0.913	0.891	0.0381376
Bub3	0.00116512	0.501532	0.848	0.706	0.0382923
Wipi2	0.00116986	0.477332	0.652	0.437	0.0382923
Tmbim4	0.00121234	0.669749	0.87	0.866	0.0395172
Hspd1	0.0012213	0.434934	1	0.983	0.0396442
Rps15a	0.00122679	0.22529	1	1	0.0396484
Atp6v1c1	0.00123157	-0.241054	0.543	0.672	0.0396484
Nt5dc2	0.00125268	0.545017	0.87	0.782	0.0401627
Rassf10	0.001307	0.580299	0.543	0.311	0.0414261
Nxn	0.00130756	0.526149	0.674	0.504	0.0414261
Vezf1	0.00131054	0.489667	0.804	0.672	0.0414261
Snrpb2	0.00131327	0.512356	0.891	0.84	0.0414261
Pdlim5	0.0013427	0.577807	0.5	0.353	0.0421844
Fau	0.0013539	0.227609	1	1	0.0423662
Mpzl1	0.00139754	0.464451	0.783	0.588	0.0435575
Arf5	0.00140931	0.531772	0.978	0.975	0.0437167
Gbf1	0.00141563	0.446402	0.717	0.487	0.0437167
Dynll2	0.00141941	0.504195	0.848	0.756	0.0437167
Sod1	0.00143911	0.506898	0.717	0.647	0.0441242
Hist1h1c	0.00144392	-0.366819	0.37	0.462	0.0441242
Slc38a2	0.0014592	0.620863	0.935	0.941	0.0444175
Ndufb8	0.00150576	0.565808	1	0.983	0.0456573
Lpin2	0.00153581	0.6451	0.609	0.395	0.0461029
Calr	0.00153688	0.493454	0.978	0.958	0.0461029
Sdhb	0.00153814	0.514021	0.935	0.908	0.0461029
Atox1	0.00155885	0.570516	0.935	0.882	0.046372
Atp5f1	0.00155897	0.499186	0.978	0.992	0.046372
Taok1	0.00157061	0.625706	0.761	0.513	0.0465412
Ncbp2	0.0015868	0.470116	0.848	0.672	0.0468436
Ctnnb1	0.0015972	0.556048	0.935	0.975	0.0468772
Tysnd1	0.00159993	0.439656	0.565	0.378	0.0468772
Tanc1	0.00167157	0.591754	0.587	0.496	0.0486172
Alyref	0.00167566	0.508353	0.87	0.782	0.0486172
Cdh4	0.00167796	0.564435	0.478	0.21	0.0486172
Tlcd1	0.00168543	-0.214505	0.304	0.538	0.0486535
Nfkbia	0.00169562	-0.288937	0.457	0.605	0.0487678
Sub1	0.00171937	0.45372	0.978	0.983	0.0492698
Rpl26	0.00174262	0.184995	1	1	0.0497168
Me3	0.00174768	0.504526	0.652	0.395	0.0497168
Rps12	0.00175645	0.205181	1	1	0.0497852
Snrpb	0.00177484	0.463187	0.957	0.966	0.0501248
Cnot1	0.00179629	0.512227	0.696	0.563	0.0505012
Mff	0.00180108	0.49512	0.891	0.824	0.0505012
Nucb1	0.00180879	0.484056	0.87	0.672	0.0505362
Rcn1	0.0018162	0.709837	0.935	0.84	0.0505627
Cdc14a	0.00185227	0.591848	0.435	0.168	0.0512363
Srsf7	0.00185349	0.562539	1	0.899	0.0512363
Ttyh3	0.00187564	0.47211	0.609	0.437	0.0516485
Wbp1	0.001882	0.502457	0.761	0.597	0.0516485
Ppp1cc	0.00188821	0.470193	0.913	0.857	0.0516485
Homer2	0.00191319	0.499406	0.522	0.227	0.0521123
Hpcal1	0.00191849	0.410609	0.609	0.269	0.0521123
Ptbp1	0.00195279	0.496964	0.804	0.857	0.0526882
Mfsd1	0.00195316	0.491736	0.609	0.513	0.0526882
Fggy	0.00197147	-0.299582	0.152	0.378	0.05271
Phb	0.00197154	0.473558	0.891	0.832	0.05271
Lsm1	0.00197418	0.491616	0.783	0.622	0.05271
Rps8	0.00199051	0.262836	1	1	0.0529651
Igfbp4	0.00200933	0.720324	0.957	0.731	0.0532846
Slc9a3r2	0.00206904	0.443141	0.587	0.445	0.0546829
Homer3	0.00208796	0.435455	0.565	0.277	0.0548363
Ppan	0.00208887	-0.13808	0.587	0.681	0.0548363
Noc4l	0.00210348	0.402842	0.609	0.303	0.0550352
Rbm6	0.00211638	0.456824	0.739	0.563	0.0550815
Rpgr	0.00211933	0.443333	0.609	0.353	0.0550815
Selenom	0.00212846	0.678852	0.587	0.361	0.0551356
Slc35b1	0.00217084	0.426301	0.674	0.504	0.0560477
Exoc6	0.00219034	-0.205523	0.348	0.563	0.0563653
Ptprf	0.00221318	0.576172	0.739	0.546	0.0567662
Zfand5	0.00222958	0.53747	0.913	0.782	0.0568882
Nfyb	0.00223248	0.477083	0.761	0.555	0.0568882
Svopl	0.0022422	0.48824	0.543	0.168	0.0569505
Tkt	0.00226703	0.49735	0.978	0.916	0.0573948
Zmynd19	0.00227471	0.393786	0.587	0.336	0.0574033
Uchl1	0.00228387	0.51716	0.609	0.319	0.0574492
Hist1h1b	0.00232393	0.770286	0.522	0.319	0.0582697
Pclaf	0.00240466	0.683603	0.609	0.319	0.0600915
Ldhb	0.00241334	0.652466	1	0.933	0.0600915
Atp5o.1	0.00241964	0.524947	0.957	0.975	0.0600915
Dnajc10	0.00243289	0.49014	0.652	0.462	0.0602293
Magt1	0.00248204	0.495537	0.891	0.689	0.0612523
Hspa2	0.00249367	-0.279243	0.283	0.462	0.0612873
Rps16	0.00249912	0.237016	1	1	0.0612873
Atp5a1	0.00250992	0.450872	0.978	1	0.061288
Tsc22d3	0.00251482	0.402361	0.674	0.328	0.061288
Eif3j2	0.00253568	-0.168012	0.391	0.622	0.0616045
Fras1	0.00254611	0.745038	0.587	0.437	0.0616663
Gm13855	0.00263747	-0.337372	0.196	0.361	0.063682
Vcp	0.00265191	0.487269	0.978	0.975	0.0638334
Ube2d3	0.00266588	0.496123	0.957	0.941	0.063973
Usp22	0.0026796	0.559088	0.761	0.563	0.0641056
Ddx5	0.00271362	0.513732	0.978	0.992	0.0645547
Met	0.00271488	-0.269364	0.348	0.555	0.0645547
Igfbp5	0.00279043	0.922799	0.739	0.445	0.0661501
Slc35b2	0.00279891	0.468056	0.717	0.639	0.0661506
Atp6ap2	0.00282215	0.529703	0.783	0.765	0.066499
Mcts2	0.00283555	0.416025	0.543	0.261	0.0666142
Flywch1	0.00284711	0.437919	0.587	0.42	0.0666856
Ccdc85b	0.00289601	0.439656	0.652	0.454	0.0676282
Pbx1	0.00291007	0.77341	0.848	0.866	0.0676808
Pgp	0.00292039	0.576565	0.652	0.513	0.0676808
Ptch1	0.00292421	0.502027	0.652	0.462	0.0676808
Pon2	0.00299526	0.398747	0.587	0.252	0.0691172
Sco2	0.00300394	-0.175159	0.391	0.588	0.0691172
Gsn	0.00304812	1.22113	0.435	0.37	0.0699281
Tulp4	0.00306972	0.476177	0.674	0.58	0.0701374
Ezr	0.00307518	-0.159202	0.978	0.966	0.0701374
Ahdc1	0.00310764	0.573455	0.478	0.227	0.0706717
Hoxb3	0.00313051	-0.160869	0.391	0.563	0.0709854
Rpl35	0.00316387	0.398585	1	1	0.0713199
Krr1	0.00316856	0.410669	0.587	0.353	0.0713199
G3bp2	0.00317261	0.552739	0.848	0.84	0.0713199
Serf2	0.00318598	0.552583	0.978	0.983	0.0714153
L3mbtl3	0.00321463	-0.241348	0.217	0.42	0.0718515
Tsn	0.00326181	0.508468	0.957	0.975	0.0726983
Rps15	0.00330111	0.203696	1	1	0.0733254
Hmgb1	0.00332685	0.534428	0.978	1	0.0733254
Pgm1	0.00332937	0.421839	0.543	0.193	0.0733254
Abhd8	0.00333205	0.411486	0.587	0.311	0.0733254
Bbx	0.00333909	0.610322	0.826	0.739	0.0733254
2410002F23Rik	0.00334618	0.42399	0.63	0.462	0.0733254
Dhcr24	0.0034116	0.523038	0.5	0.294	0.0743405
Abhd11	0.00341474	-0.13213	0.457	0.622	0.0743405
Hnf1aos1	0.00342101	-0.221916	0.283	0.504	0.0743405
Ppp2r5b	0.00350143	0.505012	0.435	0.235	0.0758773
Id1	0.00351265	-0.126109	0.696	0.739	0.07591
Uqcr10	0.00353547	0.534354	0.978	0.958	0.0761928
Sf3a1	0.00362102	0.42399	0.674	0.437	0.0775316
Celsr2	0.00362908	0.580735	0.696	0.437	0.0775316
Smc4	0.00363168	0.626242	0.674	0.588	0.0775316
Lsm8	0.00364546	0.464974	0.783	0.706	0.0775316
Mlf2	0.00365095	0.545017	0.891	0.882	0.0775316
Stox2	0.00365706	0.417057	0.63	0.345	0.0775316
Zfp622	0.00369749	-0.114229	0.652	0.765	0.0781769
Gna11	0.00372956	0.482674	0.826	0.647	0.0786425
Plscr1	0.00376106	-0.184062	0.326	0.571	0.078972
Zfp131	0.00376538	0.484913	0.522	0.361	0.078972
Brd3	0.00377766	0.570297	0.739	0.723	0.0790177
Ndufc1	0.00385239	0.523218	0.978	0.958	0.0803348
Jam3	0.00386116	0.397097	0.543	0.269	0.0803348
Ap2m1	0.00387546	0.582142	0.913	0.933	0.0804184
Exosc7	0.00389616	0.444934	0.848	0.798	0.0806341
Atp1b3	0.00395535	0.559259	0.652	0.588	0.0816429
Phlda1	0.00398316	0.944651	0.391	0.185	0.0820006
Mast4	0.0040659	-0.15491	0.435	0.605	0.0834843
Comt	0.00412332	0.640327	0.783	0.723	0.0844417
Lgmn	0.00415099	-0.122518	0.674	0.815	0.0847864
Birc5	0.00416676	0.760309	0.457	0.244	0.0848718
Rps27a	0.00417687	0.244203	1	1	0.0848718
Fstl3	0.00420026	-0.228173	0.196	0.42	0.0851261
Agpat5	0.00421993	-0.212105	0.609	0.739	0.0853036
Sel1l	0.00423496	0.45477	0.587	0.429	0.0853868
Tmem135	0.0042475	-0.230651	0.304	0.42	0.0854196
Emid1	0.00429739	0.619297	0.935	0.571	0.0862012
Wnt4	0.00440824	0.925845	0.696	0.37	0.0879745
Cse1l	0.00441617	0.421638	0.5	0.328	0.0879745
Snrpg	0.00442326	0.457889	0.913	0.95	0.0879745
Itfg2	0.00443077	0.369813	0.565	0.336	0.0879745
Smc1a	0.00447698	0.56218	0.87	0.874	0.0886179
Ubald2	0.00448583	0.530489	0.848	0.664	0.0886179
Mbd3	0.00451849	0.44581	0.935	0.958	0.0890381
Maml3	0.00457151	0.480478	0.522	0.311	0.0898565
Tmem222	0.00460705	0.395981	0.717	0.437	0.0902379
Usp4	0.00461398	0.420964	0.565	0.387	0.0902379
1700011H14Rik	0.0046621	-0.16544	0.717	0.765	0.0906878
Rfc3	0.00466641	0.433659	0.761	0.529	0.0906878
Tmem55a	0.00467176	-0.127077	0.435	0.613	0.0906878
Dhx15	0.00470332	0.505549	0.804	0.739	0.0910744
Sar1b	0.00474333	0.453079	0.848	0.672	0.0916224
Fkbp1a	0.00475951	0.460214	0.957	0.916	0.0916802
Irak1bp1	0.00477611	0.411486	0.717	0.42	0.0916802
Cycs	0.00478148	0.565459	0.913	0.807	0.0916802
Spsb4	0.00482475	0.477194	0.565	0.361	0.0921908
Nasp	0.00483168	0.573106	0.935	0.84	0.0921908
Cdc5l	0.00493436	0.442836	0.87	0.647	0.0939209
Nos1ap	0.004979	0.507913	0.435	0.218	0.0945406
Ltbp1	0.00506295	0.506551	0.5	0.185	0.0959018
Mxra8	0.00508148	0.533588	0.565	0.277	0.0960202
Myh10	0.00512744	0.709947	0.696	0.63	0.0966553
Lsm3	0.00514051	0.458308	0.848	0.689	0.0966688
Wdr46	0.00517305	-0.136154	0.565	0.571	0.0970475
Dab2ip	0.00527381	0.445556	0.543	0.294	0.098701
Scube3	0.00534678	0.510531	0.543	0.311	0.0998278
Hnrnpa3	0.00536998	0.519018	0.935	0.975	0.10002
Aes	0.00538267	0.627709	0.935	0.966	0.10002
Pepd	0.00541739	0.507277	0.848	0.731	0.100427
Ergic2	0.00545189	0.459962	0.826	0.79	0.100828
Cox7a2	0.00548502	0.494563	0.978	1	0.101201
Canx	0.00550057	0.487959	0.978	0.916	0.101249
Fmc1	0.00554498	0.458525	0.848	0.773	0.101791
Trim2	0.00555603	0.509831	0.543	0.387	0.101791
Bcam	0.00559406	0.921703	0.826	0.723	0.102249
Ptpn1	0.00563553	0.477784	0.652	0.546	0.102619
Hint1	0.00564059	0.512718	1	0.983	0.102619
Steap1	0.00567727	-0.284989	0.457	0.58	0.103047
Uap1	0.00570093	-0.240245	0.391	0.445	0.103237
Tenm4	0.00573363	0.505575	0.5	0.353	0.103453
Ch25h	0.00573932	-0.461521	0.043	0.294	0.103453
Epb41l4a	0.00582983	0.449413	0.478	0.311	0.104843
Dnmt1	0.00589106	0.509831	0.522	0.387	0.105701
Slc25a5	0.00594886	0.469347	0.978	0.966	0.106494
Gm17750	0.00597501	0.508028	0.587	0.294	0.106708
Tcaf1	0.00598807	0.612028	0.826	0.647	0.106708
Cystm1	0.0061539	-0.184235	0.609	0.664	0.109414
Crip2	0.00626004	0.738111	0.848	0.487	0.111048
Glrx5	0.0062976	0.466427	0.935	0.857	0.111261
Nudcd2	0.0063005	0.456702	0.826	0.765	0.111261
Coq7	0.00634105	0.474925	0.891	0.782	0.11156
H2-Ab1	0.00634594	-0.155123	0.435	0.563	0.11156
Bmp3	0.0063943	0.993862	0.457	0.269	0.112129
Hnrnph1	0.00640693	0.45701	0.891	0.882	0.112129
Fam20c	0.00643626	0.400027	0.543	0.303	0.11239
Dpysl2	0.006456	0.417678	0.5	0.151	0.112484
Hmga1	0.00667508	0.407961	0.63	0.462	0.116043
Cox8a	0.0067341	0.549796	1	1	0.116567
Plekha5	0.00673507	0.503293	0.652	0.479	0.116567
Srsf11	0.00677906	0.51176	0.957	0.941	0.116993
Pitpnb	0.00678954	0.421124	0.717	0.605	0.116993
Snapc5	0.00688956	0.41815	0.696	0.622	0.118455
Lap3	0.00691755	0.461968	0.891	0.899	0.118675
Odc1	0.00698969	0.640527	0.804	0.782	0.119651
Cmtm3	0.00705468	0.407739	0.609	0.429	0.120211
Plod3	0.0070585	0.397322	0.652	0.462	0.120211
Ndufs6	0.00706855	0.474096	0.891	0.958	0.120211
Usp46	0.00709735	0.421957	0.587	0.395	0.120368
Rab21	0.00710854	0.429185	0.826	0.689	0.120368
Prss8	0.00713451	-0.231512	0.261	0.445	0.120547
A730017C20Rik	0.00715252	0.541656	0.478	0.16	0.120591
Ap1m1	0.00717133	0.441297	0.565	0.471	0.120648
Zfr	0.00728129	0.560284	0.674	0.63	0.122235
Pou3f3	0.00732344	-0.429123	0.196	0.462	0.122679
Psme4	0.00734449	0.441339	0.674	0.395	0.122769
Mpdz	0.00738687	0.441581	0.5	0.319	0.123214
Ttc36	0.00745095	-0.259156	0.348	0.597	0.124019
B230219D22Rik	0.00747705	0.567832	0.913	0.849	0.124189
Csnk1g2	0.00751591	0.431919	0.783	0.782	0.12457
Hspa14	0.00760399	0.40435	0.652	0.487	0.125465
Tor1b	0.00760819	0.393786	0.522	0.336	0.125465
Ccnd3	0.00763377	0.576075	0.826	0.613	0.125465
Tufm	0.00763407	0.44873	0.804	0.613	0.125465
Ccs	0.00765246	0.446171	0.652	0.655	0.125473
Cnn3	0.00766872	0.56124	0.87	0.773	0.125473
Oxct1	0.00768271	0.595661	0.87	0.807	0.125473
1110008F13Rik	0.0077066	0.439656	0.935	0.874	0.125558
Ranbp2	0.00771998	0.47159	0.674	0.521	0.125558
Pax2	0.00775812	0.789214	0.652	0.622	0.125917
Romo1	0.0078928	0.458632	0.978	0.958	0.127532
Kcnq1ot1	0.00789476	0.559976	0.978	0.924	0.127532
Ywhaz	0.00790657	0.593566	0.935	0.941	0.127532
Ccdc88c	0.00796124	0.449707	0.63	0.445	0.12815
Nav2	0.00803154	0.542656	0.522	0.454	0.129016
Tubb5	0.0081124	0.66319	0.978	0.983	0.130048
Dnmt3a	0.00815666	0.498497	0.783	0.731	0.13049
Hnrnph3	0.00817613	0.477576	0.804	0.748	0.130534
Echs1	0.00847998	0.451778	0.891	0.882	0.13511
Gm1673	0.00853423	0.595082	0.891	0.824	0.135698
Dmxl1	0.00856944	0.43479	0.63	0.454	0.135759
Rps10	0.0085728	0.250749	1	1	0.135759
Rpl7a	0.0086525	0.390619	1	1	0.136744
Wac	0.00871459	0.449381	0.761	0.706	0.137448
Smarcd2	0.00874646	0.373745	0.543	0.294	0.137532
Tmed9	0.00878594	0.430366	1	0.958	0.137532
Osbpl3	0.00878667	-0.14813	0.304	0.462	0.137532
Khdrbs1	0.00879026	0.490777	0.87	0.857	0.137532
Serpinf1	0.00891987	0.610156	0.435	0.143	0.139282
Tipin	0.00899954	0.43479	0.63	0.471	0.140246
Pik3r1	0.0090547	0.503807	0.457	0.244	0.140825
Taf3	0.00911004	0.412988	0.587	0.403	0.141404
Gli3	0.00915253	0.453546	0.413	0.185	0.141783
Nsa2	0.00927072	0.137857	0.913	0.95	0.143173
Rcc2	0.00927887	0.471321	0.826	0.748	0.143173
Spata13	0.009332	-0.181868	0.326	0.437	0.143709
Cd24a	0.00937824	0.491408	0.978	0.908	0.144138
Ddb1	0.00945003	0.566219	0.848	0.874	0.144744
Wars	0.00947303	0.342372	0.63	0.361	0.144744
Ccdc124	0.0094732	0.46157	0.804	0.706	0.144744
Kmt2a	0.00954188	0.450429	0.783	0.63	0.145509
Sema5a	0.00970844	-0.150543	0.609	0.706	0.147687
Git2	0.00972247	0.451234	0.696	0.538	0.147687
Tma7	0.00981998	0.471396	0.957	0.975	0.148879
Gclm	0.00986547	-0.132019	0.674	0.714	0.14928
Sntb2	0.00993213	0.437872	0.543	0.403	0.149762
Tcf7l2	0.00993561	0.459362	0.609	0.429	0.149762
Tbc1d20	0.00996311	0.399305	0.5	0.378	0.149887
Eif3i	0.0100193	0.13633	0.913	0.983	0.150444
Cgnl1	0.0100537	0.743688	0.435	0.311	0.150671
Malat1	0.0100763	-0.220145	1	1	0.15072
Pbrm1	0.0101033	0.552697	0.913	0.882	0.150781
Rlim	0.0101189	0.420332	0.587	0.462	0.150781
Phldb1	0.0101645	-0.143955	0.435	0.521	0.151172
Rpl32	0.0102632	0.251519	1	1	0.152202
Sppl3	0.0102726	0.47632	0.63	0.597	0.152202
Cox6c	0.0102971	0.537272	1	1	0.152276
Ikbkb	0.0103219	0.419854	0.609	0.387	0.152355
Kansl1	0.0104385	0.405597	0.696	0.555	0.153786
Bmpr1a	0.0104694	0.468644	0.717	0.613	0.153951
Trib2	0.0105371	0.6451	0.391	0.21	0.154657
Hnrnph2	0.0106004	0.417371	0.761	0.546	0.155293
As3mt	0.0106583	0.401042	0.674	0.504	0.155587
Cntfr	0.0106602	0.61401	0.435	0.118	0.155587
2810403A07Rik	0.0106808	0.430354	0.543	0.353	0.155598
Rhou	0.0108573	0.512955	0.565	0.42	0.157876
Rpap3	0.0108789	0.44115	0.652	0.521	0.157895
Gdi2	0.0109882	0.422904	1	0.941	0.159186
Adnp	0.0110806	0.367877	0.478	0.244	0.160229
Lsm12	0.0111347	0.461469	0.891	0.798	0.160582
Arid4b	0.0111461	0.44729	0.891	0.807	0.160582
Col6a2	0.0111868	0.62506	0.348	0.134	0.160873
Snrpc	0.011296	0.459362	0.891	0.899	0.162145
Nudt4	0.0114749	0.4679	0.739	0.605	0.16441
Pcna	0.0115054	0.365376	0.435	0.218	0.164546
Fam193a	0.011544	0.542841	0.543	0.513	0.164797
Mettl9	0.0115711	0.438292	0.913	0.899	0.164883
Thra	0.0117092	0.530628	0.609	0.429	0.166303
Cdk13	0.0117133	0.431874	0.609	0.496	0.166303
Papd4	0.0118549	0.369253	0.5	0.218	0.168009
mt-Atp6	0.011985	0.4299	1	1	0.169294
Plat	0.0119889	0.929691	0.609	0.336	0.169294
Srsf2	0.012089	0.457092	0.957	0.958	0.170401
Mfap4	0.0121243	0.715444	0.348	0.126	0.170513
1500009L16Rik	0.0121406	0.4164	0.457	0.185	0.170513
Golm1	0.0121762	0.425754	0.5	0.294	0.17068
Uhrf2	0.0122019	0.468112	0.913	0.765	0.17068
Mrps21	0.0122329	0.450309	0.891	0.882	0.17068
Socs7	0.0122881	0.37211	0.478	0.235	0.17068
Cox5a	0.0123005	0.548835	1	0.975	0.17068
Tecr	0.012372	0.444906	0.978	0.975	0.17068
Cxadr	0.0123756	0.491671	0.63	0.588	0.17068
Kpnb1	0.0123898	0.430121	0.783	0.672	0.17068
Apln	0.0124078	-0.536908	0.022	0.261	0.17068
Pccb	0.0124278	-0.129696	0.348	0.504	0.17068
Mcm3	0.0124414	0.457131	0.5	0.412	0.17068
Tmsb10	0.0124471	0.692993	1	1	0.17068
Acer2	0.0124559	-0.210536	0.478	0.546	0.17068
Usmg5	0.0124579	0.445722	0.978	0.975	0.17068
Pdk1	0.0124802	-0.143143	0.283	0.454	0.170687
Rpl39	0.0125378	0.378582	1	1	0.170901
Atp5h	0.0125621	0.425309	1	0.992	0.170901
H2afy	0.0125682	0.464827	0.913	0.941	0.170901
Prom1	0.0125833	0.397564	0.652	0.311	0.170901
Ttc4	0.0126554	0.442419	0.696	0.563	0.171486
Uqcrc1	0.0126951	0.465915	0.935	0.924	0.171486
Ppp2r2a	0.0126965	0.448249	0.804	0.756	0.171486
Casp8	0.012714	-0.143902	0.413	0.555	0.171486
Ublcp1	0.0127975	0.377479	0.63	0.412	0.172315
Traf3ip1	0.0128403	0.410609	0.522	0.286	0.172466
Rragd	0.0128528	-0.2043	0.261	0.546	0.172466
Hoxd11	0.0128772	0.500461	0.565	0.42	0.172466
Cpsf6	0.0128969	0.428022	0.761	0.756	0.172466
Cux1	0.0129421	0.120134	0.804	0.933	0.172775
Mdh2	0.0129804	0.466135	0.978	0.975	0.172797
Slc39a8	0.0129994	-0.234391	0.348	0.471	0.172797
Fgd1	0.0130443	0.358687	0.522	0.21	0.172797
Clstn1	0.0130476	0.443052	0.652	0.42	0.172797
U2af2	0.0130542	0.43275	0.826	0.739	0.172797
Gnaq	0.0130898	0.511115	0.652	0.496	0.172975
Fis1	0.0131742	0.586449	0.957	0.924	0.173798
Tomm7	0.0132195	0.453481	0.891	0.992	0.173957
Ube3a	0.013232	0.474973	0.935	0.891	0.173957
Tpx2	0.013253	0.548323	0.348	0.193	0.173957
Dapl1	0.0133294	1.08888	0.304	0.05	0.174666
Atp6ap1	0.0133813	0.386869	0.565	0.403	0.174771
Misp	0.0133821	-0.325811	0.152	0.361	0.174771
Zcchc18	0.0134672	0.435016	0.413	0.143	0.17559
Atxn1	0.0135981	0.601664	0.457	0.227	0.176662
Itpa	0.0136137	0.387497	0.783	0.597	0.176662
Dnajc5	0.0136388	0.515164	0.674	0.605	0.176662
Scd2	0.0136398	0.624138	0.783	0.672	0.176662
Cox6b1	0.0137619	0.474523	0.957	0.992	0.177949
Mcm7	0.0138002	0.412341	0.804	0.723	0.17815
Phgdh	0.0138582	-0.183843	0.978	0.966	0.178604
Ltn1	0.0139142	0.345368	0.587	0.286	0.179031
Tsc22d2	0.0139427	0.443052	0.522	0.429	0.179104
Ppa1	0.0139801	0.436883	0.804	0.765	0.179289
Srgap1	0.0140467	0.784316	0.761	0.613	0.179849
Hoxb7	0.0140805	-0.112412	0.543	0.689	0.179907
Acsl3	0.0140973	0.392202	0.565	0.311	0.179907
Sqle	0.0142097	0.478326	0.587	0.311	0.181046
mt-Co3	0.0142523	0.452091	1	1	0.181213
Mme	0.0142691	-0.231354	0.391	0.756	0.181213
Cox7b	0.0143744	0.45758	0.978	0.966	0.182255
Reep3	0.0144025	0.589815	0.674	0.58	0.182315
Snrpf	0.014482	0.480703	0.957	0.95	0.18265
Hnrnpa2b1	0.0145035	0.503801	0.978	1	0.18265
Mmp23	0.0145231	0.831479	0.609	0.286	0.18265
Mrpl55	0.0145576	0.449097	0.696	0.697	0.18265
Mcm2	0.0145667	0.379937	0.63	0.395	0.18265
Efnb1	0.0145691	0.64106	0.674	0.462	0.18265
Chka	0.014797	0.506796	0.674	0.538	0.184293
Fasn	0.014807	0.381789	0.478	0.319	0.184293
Vdac1	0.0148243	0.489907	0.978	0.966	0.184293
Kdelr2	0.0148584	0.417678	0.783	0.664	0.184293
Dhx30	0.0148746	0.397482	0.674	0.58	0.184293
Eif2s3y	0.0148823	0.361404	0.565	0.168	0.184293
Cbl	0.0149309	0.379937	0.565	0.412	0.184293
Nsd3	0.0149451	0.435498	0.674	0.63	0.184293
Emsy	0.0149786	0.409351	0.565	0.496	0.184293
Mocs2	0.014982	0.394633	0.783	0.681	0.184293
Col6a1	0.0149828	0.685106	0.304	0.076	0.184293
Hsbp1	0.0149869	0.497063	0.935	0.941	0.184293
Gna12	0.0150064	0.359118	0.543	0.336	0.184293
Dicer1	0.0150422	0.436803	0.674	0.58	0.184444
Psat1	0.0150663	0.457311	0.478	0.092	0.184451
Lamp1	0.0151475	0.474711	0.957	0.933	0.185015
Atp11b	0.0151597	0.478642	0.674	0.462	0.185015
Fastk	0.0151858	0.425472	0.609	0.504	0.185044
Fnbp1l	0.0152477	0.517043	0.674	0.697	0.18551
Slc35a4	0.0152776	0.404435	0.543	0.395	0.185585
Trim59	0.0153402	0.423939	0.5	0.311	0.185953
Rpl28	0.0153555	0.256827	1	1	0.185953
F11r	0.0154184	0.469394	0.739	0.555	0.186221
B3gat2	0.0154349	-0.251671	0.152	0.319	0.186221
Rdm1	0.0154495	-0.174657	0.261	0.403	0.186221
Cd81	0.0154913	0.496986	0.935	0.941	0.186221
Rbfox2	0.0155054	0.461198	0.565	0.445	0.186221
Cxxc5	0.0155204	0.66644	0.87	0.807	0.186221
Rab3a	0.0156064	0.4164	0.478	0.193	0.186664
Smarcd1	0.0156137	0.424092	0.696	0.647	0.186664
Plxnb2	0.0156289	0.486709	0.696	0.655	0.186664
Dpp3	0.015771	0.407995	0.783	0.555	0.187937
Rpn2	0.0157835	0.411804	0.935	0.849	0.187937
Slc25a3	0.0159276	0.461103	1	1	0.189364
Tshz2	0.0160029	0.562592	0.848	0.731	0.189971
Ndufs4	0.0161497	0.44823	0.935	0.899	0.191279
Rnf38	0.016162	0.392589	0.457	0.193	0.191279
Stard4	0.0163709	0.373745	0.565	0.261	0.193442
Rps28	0.0163942	0.241534	1	1	0.193442
Pnkd	0.0164465	0.447131	0.783	0.697	0.193672
Ranbp1	0.0164632	0.398985	0.957	0.958	0.193672
Gnai3	0.0165149	0.436272	0.804	0.731	0.193988
Atp6v0d1	0.0165808	0.462674	0.63	0.706	0.19447
Entpd5	0.0166442	-0.192582	0.217	0.403	0.194922
Lsm5	0.0167235	0.39911	0.804	0.672	0.19529
Maged2	0.0167256	0.626432	0.848	0.908	0.19529
Auh	0.0167814	0.400126	0.63	0.496	0.195457
Cdca3	0.0167899	0.569885	0.326	0.126	0.195457
Actr1b	0.0168454	0.384565	0.609	0.437	0.195607
Calu	0.0168562	0.463524	0.826	0.807	0.195607
Wnt5b	0.0168778	0.442069	0.435	0.151	0.195607
Hikeshi	0.0169611	0.415987	0.826	0.655	0.196282
Tyms	0.0172485	0.442477	0.717	0.563	0.199313
Cdh2	0.017367	0.545017	0.457	0.311	0.200095
Ccdc189	0.0173785	-0.19692	0.196	0.378	0.200095
Tomm5	0.0173929	0.454694	0.978	0.908	0.200095
Sipa1l1	0.0175721	0.454045	0.565	0.412	0.201608
Ddost	0.0175845	0.430975	0.891	0.958	0.201608
Dcakd	0.0176017	0.432539	0.761	0.723	0.201608
Epcam	0.0176385	-0.185635	0.804	0.849	0.201733
Bloc1s2	0.0177553	0.385666	0.717	0.555	0.202745
Hnrnpu	0.0178054	0.476557	0.978	1	0.202745
Slc19a1	0.017837	-0.179383	0.261	0.429	0.202745
Gsta3	0.0178483	0.450019	0.5	0.202	0.202745
Srsf3	0.0178565	0.379881	1	0.983	0.202745
Chchd7	0.0180495	0.432315	0.848	0.723	0.204639
Nudt14	0.0181217	0.387271	0.652	0.496	0.20516
Fnta	0.0181945	0.39824	0.848	0.697	0.205687
Rbbp7	0.0182658	0.473443	0.891	0.84	0.205711
Mtdh	0.0182959	0.486242	0.891	0.941	0.205711
Psmb5	0.0182971	0.429387	0.978	0.975	0.205711
Cox7c	0.0183018	0.398771	1	0.983	0.205711
Top2a	0.0183354	0.817757	0.348	0.303	0.205794
Jund	0.0183838	0.685774	0.978	0.966	0.20604
Enpep	0.0184627	0.495746	0.848	0.655	0.206629
Pdia3	0.0185133	0.448283	0.957	0.958	0.206899
Usp9x	0.018619	0.461982	0.761	0.664	0.207732
Gpx8	0.0186409	0.486521	0.717	0.613	0.207732
Cyb5r3	0.0187375	0.489957	0.87	0.664	0.208512
Emx2	0.0187775	0.486965	0.913	0.773	0.208659
Hnrnpa1	0.0190561	0.366629	1	1	0.211456
Ccnh	0.019116	0.391957	0.674	0.546	0.211551
Cdip1	0.0191366	0.405255	0.587	0.471	0.211551
Jmjd6	0.0191459	0.389824	0.717	0.597	0.211551
Tmem263	0.0192389	0.369452	0.565	0.345	0.212279
Parp1	0.0193336	0.464974	0.761	0.689	0.213024
Igfbp2	0.019415	0.934538	0.804	0.445	0.21362
Ift57	0.0194923	-0.114229	0.391	0.546	0.214169
Dut	0.0195725	0.439656	0.761	0.773	0.214749
Fbrs	0.0196909	0.358687	0.457	0.244	0.215744
Jagn1	0.0197552	0.403289	0.848	0.697	0.216147
Ywhaq	0.0198573	0.38031	1	0.992	0.216896
1810058I24Rik	0.0198851	0.50925	0.935	0.933	0.216896
Praf2	0.0199068	0.368561	0.522	0.303	0.216896
Psmb6	0.0199534	0.399937	0.957	0.992	0.216998
Msl1	0.0199717	0.439656	0.696	0.613	0.216998
Cenpf	0.0200221	0.659048	0.413	0.21	0.217244
Rala	0.0200932	0.489718	0.935	0.882	0.217621
Gnb2	0.0201155	0.537481	0.957	0.992	0.217621
Dtd2	0.0201403	-0.117359	0.478	0.538	0.217621
Ndufb7	0.0201973	0.453048	0.957	0.958	0.217936
Atxn2	0.0203209	0.424092	0.674	0.672	0.218712
Kif12	0.0203491	-0.162872	0.783	0.866	0.218712
Rnf145	0.0203531	0.350425	0.5	0.319	0.218712
Bex3	0.0203951	0.495372	0.935	0.966	0.218863
Odf2	0.0204282	0.355775	0.565	0.319	0.218917
Sec23a	0.0204854	0.388069	0.543	0.395	0.21917
Bnip2	0.0205231	0.476698	0.761	0.655	0.21917
Srsf1	0.0205358	0.438588	0.87	0.714	0.21917
Armc1	0.0206071	0.37935	0.761	0.681	0.219497
Cyp51	0.0206225	0.379293	0.696	0.529	0.219497
Tpmt	0.0207904	-0.165675	0.522	0.597	0.220982
Rab11b	0.0209145	0.42108	0.739	0.773	0.222
Arfip1	0.0209831	0.369253	0.413	0.252	0.222427
Bgn	0.0211322	0.658346	0.37	0.109	0.223165
Fam8a1	0.0211339	0.334069	0.565	0.252	0.223165
Xpo4	0.0211384	0.342234	0.522	0.269	0.223165
Phactr2	0.0211755	0.457048	0.543	0.353	0.223256
Mxra7	0.0212155	0.4164	0.435	0.311	0.223376
Rasl11b	0.0214017	0.839852	0.652	0.429	0.225035
Dynlrb1	0.0214716	0.426367	0.957	0.933	0.225465
Tspyl1	0.0215003	0.349708	0.457	0.269	0.225465
Meg3	0.0216865	1.1286	0.478	0.227	0.226918
Pygb	0.0216968	0.418454	0.435	0.168	0.226918
Cyc1	0.0217476	0.491907	0.935	0.891	0.227145
Mgrn1	0.0218522	0.390866	0.522	0.378	0.227933
Sec13	0.0219223	0.440923	0.717	0.655	0.228136
Saraf	0.02193	0.413954	0.891	0.681	0.228136
Snapc3	0.0221091	0.390866	0.413	0.261	0.229694
Psph	0.0224363	-0.124225	0.674	0.664	0.23257
Mycn	0.0224454	0.390866	0.522	0.269	0.23257
Rpl37	0.0225352	0.383827	1	1	0.233192
Apbb1	0.0226377	0.354973	0.457	0.277	0.233943
Pgls	0.0226839	0.409893	1	0.958	0.234111
Cdkn1c	0.0227158	0.828927	0.891	0.765	0.234131
Hsf2	0.0227747	0.407617	0.413	0.202	0.23443
Ccdc88a	0.0228444	0.579623	0.696	0.555	0.2348
Kmt5b	0.0228707	0.389507	0.5	0.403	0.2348
Slit2	0.0230376	0.69207	0.543	0.345	0.236087
Adat2	0.0230939	-0.143067	0.348	0.445	0.236087
Celsr1	0.0231005	0.39911	0.435	0.235	0.236087
Umps	0.0231168	0.337807	0.565	0.361	0.236087
Sptbn1	0.0233565	0.621642	0.891	0.832	0.238192
4833420G17Rik	0.0233838	0.360192	0.804	0.655	0.238192
Gnb1	0.02351	0.481301	0.913	0.849	0.238878
Aldh16a1	0.0235122	0.340223	0.5	0.294	0.238878
Dnajb11	0.0237042	0.401786	0.848	0.689	0.240324
Prkacb	0.0237431	0.434541	0.543	0.437	0.240324
Mrps22	0.0237467	0.336262	0.652	0.496	0.240324
Ehmt1	0.0238329	0.403938	0.587	0.58	0.24062
Capg	0.0238374	-0.200881	0.413	0.42	0.24062
Rassf1	0.0239429	0.401916	0.652	0.58	0.241164
C530008M17Rik	0.0239862	0.333321	0.478	0.252	0.241164
Ptk7	0.0240085	0.383376	0.652	0.437	0.241164
Serpine2	0.0240417	0.466685	0.413	0.193	0.241164
Igfbp6	0.0240455	0.727339	0.587	0.286	0.241164
Hip1r	0.0245143	0.336323	0.457	0.193	0.245406
Hist3h2a	0.0245612	0.362695	0.478	0.252	0.245406
Plekhf2	0.0245625	-0.11039	0.391	0.479	0.245406
Rab20	0.0245996	-0.130431	0.348	0.504	0.245463
Snx14	0.0247788	0.353255	0.478	0.21	0.246778
Ppm1h	0.0248104	0.343196	0.435	0.193	0.246778
Ddah2	0.024826	0.474399	0.957	0.908	0.246778
Selenos	0.0249281	0.442292	0.783	0.782	0.247449
Prpf4	0.0250003	0.361404	0.435	0.252	0.247449
Mki67	0.0250051	0.794321	0.435	0.185	0.247449
Sms	0.0250201	0.392632	0.739	0.63	0.247449
Odf2l	0.0251905	0.325053	0.543	0.244	0.24882
Fam107b	0.0252312	-0.130799	0.522	0.613	0.248907
Pus1	0.0252726	-0.133531	0.391	0.462	0.249002
Gins4	0.0253276	0.361695	0.674	0.445	0.24923
Khsrp	0.0253759	0.397692	0.63	0.487	0.249391
Polr3c	0.0255499	-0.105571	0.326	0.487	0.250786
Fam117b	0.0256599	0.327131	0.565	0.319	0.251065
Wdr6	0.0256669	0.441184	0.587	0.529	0.251065
Ctdnep1	0.0256745	0.422914	0.739	0.689	0.251065
G6pc3	0.0257477	0.356865	0.5	0.353	0.2512
Impad1	0.0257526	0.488377	0.739	0.487	0.2512
Ssr2	0.0258459	0.431517	0.978	0.933	0.251797
Pck2	0.0258977	0.346566	0.478	0.21	0.251893
Cct7	0.0259423	0.127061	0.935	0.975	0.251893
Ankrd11	0.0259524	0.507277	0.957	0.908	0.251893
Srp68	0.0259945	0.386673	0.674	0.63	0.251989
Anapc1	0.0260975	0.396376	0.5	0.387	0.252675
Grb10	0.0262382	0.543959	0.848	0.815	0.253585
Cnot2	0.0262564	0.398898	0.609	0.479	0.253585
Sat1	0.0263144	0.728169	0.587	0.588	0.253831
Kcmf1	0.0264726	0.410539	0.826	0.731	0.254324
Mcfd2	0.0264734	0.367336	0.739	0.521	0.254324
2610524H06Rik	0.0264923	0.413339	0.63	0.555	0.254324
Leo1	0.0264955	0.438278	0.674	0.605	0.254324
Ppp3ca	0.0265632	0.537149	0.804	0.664	0.254509
Ggps1	0.0265798	0.368887	0.457	0.269	0.254509
Ip6k2	0.026617	0.381388	0.674	0.529	0.254554
Itm2c	0.0266796	0.448265	0.848	0.731	0.25484
Drosha	0.0267309	0.341418	0.587	0.345	0.255019
Scaf11	0.0267923	0.489373	0.935	0.899	0.255294
Set	0.027143	0.423359	0.978	0.975	0.25832
Ccser1	0.0271837	-0.22672	0.152	0.336	0.258394
Tagln2	0.0272478	-0.227683	0.609	0.613	0.258547
Polr2b	0.0272659	0.35975	0.63	0.454	0.258547
Mau2	0.0273723	0.363764	0.63	0.403	0.259241
Srrt	0.0274407	0.438474	0.761	0.697	0.259456
Arl2bp	0.0274816	0.385666	0.761	0.555	0.259456
E2f3	0.0274961	0.356542	0.457	0.319	0.259456
Fuom	0.0275276	0.386714	0.5	0.345	0.259456
Stx17	0.0275899	-0.13213	0.239	0.429	0.259548
Ifngr2	0.0276038	-0.134144	0.304	0.471	0.259548
Frmd8	0.0276453	0.343277	0.435	0.261	0.259627
Zfp503	0.0278034	0.532002	0.783	0.681	0.260388
Rbms1	0.027813	0.643109	0.717	0.706	0.260388
Surf4	0.0278262	0.424675	0.783	0.563	0.260388
Ybx1	0.0278643	0.459027	1	0.992	0.260433
Cyld	0.0280076	-0.13213	0.326	0.437	0.26146
Hmbox1	0.0280534	0.334986	0.565	0.277	0.261555
Pbx2	0.0280889	0.410907	0.652	0.588	0.261555
Gtf2a2	0.028118	0.411069	0.739	0.79	0.261555
Atp6v1b2	0.0281781	0.387788	0.739	0.622	0.261802
Zmynd8	0.0283163	0.418603	0.674	0.496	0.262774
Nucks1	0.0283538	0.415672	0.913	0.933	0.26281
Selenow	0.0283981	0.458084	0.978	0.975	0.262909
Sf3b2	0.0284736	0.471007	0.935	0.983	0.263125
Gpat4	0.0284887	0.379225	0.674	0.513	0.263125
Pmm1	0.0285829	0.366375	0.696	0.513	0.263622
Dnajc9	0.0286099	0.447037	0.543	0.538	0.263622
Ahi1	0.0286715	0.346947	0.63	0.429	0.263671
Tmem98	0.0286826	0.393786	0.413	0.319	0.263671
Scyl1	0.0287513	0.368	0.522	0.445	0.263875
Acot7	0.0287723	0.345442	0.478	0.218	0.263875
Rpl23a	0.0288758	0.232987	1	1	0.264244
Mdk	0.0288801	0.559573	0.913	0.941	0.264244
Chd4	0.0289303	0.674667	0.957	0.916	0.264395
Arhgap28	0.0291458	0.523038	0.391	0.109	0.266054
Ppp1r14b	0.0293081	0.39391	0.957	0.975	0.267026
Ttc28	0.0293206	0.514159	0.5	0.319	0.267026
Mrpl13	0.0293848	0.393963	0.87	0.849	0.267299
Smpd1	0.0294864	0.413089	0.478	0.353	0.267911
Mcm5	0.0297152	0.378217	0.478	0.319	0.269394
Zfp664	0.0297184	0.41102	0.739	0.714	0.269394
Tubb4b	0.0298459	0.615085	0.891	0.773	0.270236
Dag1	0.0298861	0.806489	0.913	0.857	0.270288
Bmp7	0.0300132	0.384087	0.543	0.361	0.271124
Ubap2	0.0300558	0.396754	0.761	0.571	0.271195
Arcn1	0.0304934	0.42495	0.783	0.655	0.274798
Chrac1	0.0305572	0.40637	0.826	0.765	0.274798
E130308A19Rik	0.0305604	0.414033	0.674	0.504	0.274798
Gkap1	0.0306229	0.419595	0.891	0.807	0.275043
Igf2bp1	0.030666	0.462779	0.783	0.664	0.275114
Dnaja1	0.0307423	0.506624	0.978	0.958	0.275484
Nid1	0.0308006	0.728993	0.348	0.151	0.275613
Crim1	0.0308489	0.76262	0.326	0.336	0.275613
Hmgcs1	0.0308625	0.47155	0.761	0.748	0.275613
Dhfr	0.0309442	0.430178	0.565	0.462	0.275916
Smad4	0.0309861	0.442887	0.717	0.748	0.275916
AW011738	0.0310021	-0.20595	0.174	0.328	0.275916
Lpp	0.0311139	0.615805	0.696	0.689	0.27659
Taok3	0.0312058	0.397692	0.37	0.185	0.27659
Ncbp3	0.0312069	0.368266	0.5	0.378	0.27659
Cct3	0.0312193	0.394613	0.978	0.958	0.27659
Prpf18	0.0313169	0.346566	0.457	0.235	0.277141
Ssbp3	0.0314016	0.462129	0.717	0.63	0.277576
Smarca5	0.0314434	0.48279	0.891	0.924	0.277632
Eef1a1	0.0315905	0.260321	1	1	0.278617
Nfic	0.0316606	0.625759	0.587	0.471	0.27892
Cpd	0.0318879	0.518437	0.804	0.672	0.280606
Aco2	0.0321576	0.413989	0.957	0.899	0.282441
Ubqln2	0.0321686	0.348769	0.609	0.42	0.282441
Prpsap1	0.0322367	0.406867	0.761	0.697	0.282721
Hmgb3	0.0325087	0.484963	0.935	0.857	0.284451
Sec14l1	0.0325352	0.344346	0.478	0.319	0.284451
Mta1	0.032543	0.369719	0.696	0.563	0.284451
Senp5	0.0325803	0.407739	0.522	0.437	0.28446
Mrps36	0.0328162	0.43508	0.848	0.748	0.285929
Usf2	0.0328217	0.370388	0.826	0.622	0.285929
Calm2	0.0328587	0.539272	0.978	0.966	0.285933
Wnt16	0.0330135	-0.110716	0.391	0.361	0.286575
Snrnp27	0.0330499	0.415462	0.913	0.933	0.286575
Mrpl19	0.033064	0.40292	0.783	0.588	0.286575
Ppp2r1a	0.033079	0.415205	0.804	0.756	0.286575
Kpna4	0.0333064	0.38449	0.674	0.546	0.288225
Arnt2	0.0335703	0.502784	0.435	0.109	0.290188
Cnot6	0.0336162	0.495255	0.804	0.655	0.290265
Tox3	0.0336802	0.397097	0.478	0.218	0.290497
Map3k11	0.0338056	0.354973	0.478	0.244	0.290945
Ptbp3	0.0338065	0.551423	0.848	0.782	0.290945
Erich1	0.0338797	0.337378	0.478	0.345	0.291254
Glyat	0.0339784	0.652437	0.283	0.227	0.291782
Safb2	0.0340383	0.434372	0.674	0.571	0.291975
Kmt2e	0.0342001	0.502757	0.913	0.857	0.293042
Rbm39	0.0342484	0.471859	0.957	0.983	0.293135
Hoxb5	0.0343665	-0.160106	0.413	0.487	0.293825
Ndufab1	0.0345391	0.437823	1	0.958	0.294977
Polr2d	0.0346849	0.346463	0.717	0.555	0.2959
Marf1	0.0347719	0.367591	0.478	0.269	0.296113
Nid2	0.0347856	0.452235	0.413	0.21	0.296113
Idi1	0.0348398	0.344346	0.609	0.311	0.296207
Surf6	0.0348724	0.336323	0.457	0.193	0.296207
Fzd3	0.0352191	0.426938	0.63	0.387	0.298828
Lsm4	0.0352948	0.37688	0.978	0.958	0.299145
Smc2	0.0353626	0.441258	0.478	0.403	0.299274
Cldn7	0.0354169	-0.41017	0.261	0.294	0.299274
Tnrc18	0.0354686	0.540806	0.565	0.529	0.299274
Prdx1	0.0354926	0.439251	1	0.992	0.299274
Myc	0.0355237	-0.162945	0.304	0.412	0.299274
Zfp428	0.0355395	0.341418	0.783	0.546	0.299274
Hdac2	0.0355778	0.414093	0.87	0.832	0.299274
Dhcr7	0.0356206	0.296556	0.5	0.218	0.299313
Tmem14c	0.0358687	0.407348	0.804	0.79	0.301073
Rbms3	0.0361803	0.484245	0.587	0.429	0.303155
Myl12a	0.0361941	0.116021	0.913	0.958	0.303155
Zrsr2	0.0362445	0.392632	0.804	0.672	0.303252
Ppp2r2d	0.0364518	0.381977	0.717	0.546	0.304562
Spc24	0.0364802	0.482674	0.457	0.345	0.304562
Hsd17b14	0.0365197	0.335296	0.435	0.202	0.304562
Sardh	0.0366323	0.426411	0.435	0.176	0.304562
Hoxc8	0.0366666	0.574939	0.565	0.412	0.304562
Twf2	0.0366794	0.355775	0.522	0.479	0.304562
Usp15	0.0367222	0.390866	0.565	0.529	0.304562
Dgcr6	0.0367226	0.402031	0.826	0.807	0.304562
Ndufs3	0.0367514	0.431304	0.913	0.916	0.304562
Pnmal2	0.0370665	-0.132382	0.261	0.429	0.306414
Hoxb2	0.0370692	-0.143391	0.696	0.706	0.306414
Snrpd2	0.0370924	0.163492	1	0.983	0.306414
Mrpl30	0.0372845	0.399247	0.913	0.908	0.307676
Rabl6	0.0373824	0.420238	0.696	0.563	0.308158
Klf3	0.0374402	0.569249	0.674	0.571	0.30831
Ccnl1	0.0375289	0.401066	0.804	0.697	0.308417
Akr1c19	0.0375321	0.441764	0.391	0.227	0.308417
St13	0.0377607	0.168812	0.935	0.992	0.309971
Cds2	0.0378678	0.316524	0.5	0.277	0.310113
Prr15	0.0378727	-0.130192	0.37	0.328	0.310113
Trim28	0.037897	0.413496	0.935	0.899	0.310113
Csnk1e	0.0382183	0.498926	0.848	0.714	0.312416
Zfhx3	0.0383281	0.556851	0.609	0.571	0.312963
Eif4ebp1	0.0383653	0.479814	0.783	0.613	0.312963
Ubn2	0.0384431	0.449076	0.761	0.773	0.313271
Gcc2	0.0385172	0.430904	0.761	0.723	0.313548
Ehd4	0.0385676	0.42108	0.413	0.261	0.313632
Prdx2	0.0387792	0.415512	1	0.992	0.315026
Eif2b5	0.0391186	0.381525	0.652	0.58	0.317453
Mcl1	0.0391884	0.51189	0.913	0.79	0.31769
Polg	0.0393306	0.413339	0.391	0.235	0.318513
Prpf19	0.0394275	0.398875	0.804	0.748	0.318725
Tor1aip1	0.0394382	0.364855	0.522	0.437	0.318725
Trim33	0.0395079	0.377562	0.674	0.58	0.318773
Npepps	0.0395258	0.408306	0.761	0.655	0.318773
Manf	0.0396079	0.418758	0.913	0.882	0.319107
Rab26os	0.0397114	0.347719	0.413	0.21	0.319612
Rplp2	0.0397527	0.244745	1	1	0.319615
Mtch1	0.0397977	0.442175	0.935	0.95	0.319648
Pls3	0.0398804	0.574005	0.717	0.487	0.319984
Pmf1	0.0400375	0.367759	0.609	0.42	0.320684
Ldb1	0.0400813	0.353126	0.543	0.429	0.320684
Ndufa3	0.0400906	0.448814	0.957	0.908	0.320684
B230118H07Rik	0.0401455	0.366819	0.783	0.647	0.320795
Crebbp	0.0402547	0.434177	0.739	0.714	0.321339
Hist1h4d	0.0403489	0.356542	0.435	0.303	0.321552
Pou2f1	0.0403684	0.351067	0.478	0.361	0.321552
Nol12	0.0404309	0.367503	0.761	0.613	0.321552
Zfp821	0.0404458	0.316973	0.543	0.412	0.321552
Huwe1	0.0407357	0.45083	0.87	0.773	0.323529
Col4a2	0.0408255	0.886038	0.891	0.882	0.323912
Apbb2	0.0408712	0.414772	0.717	0.429	0.323947
Phf5a	0.0411581	0.407568	0.913	0.891	0.325458
Ppp2r2b	0.0412622	0.470484	0.478	0.252	0.325458
Ncs1	0.0412711	0.330717	0.674	0.437	0.325458
Rspo1	0.0413086	0.552322	0.717	0.496	0.325458
Ilf2	0.0413439	0.396251	0.891	0.874	0.325458
Rbbp6	0.041346	0.468971	0.848	0.874	0.325458
Eif4ebp2	0.0413531	0.405352	0.717	0.622	0.325458
Ctxn1	0.041573	0.526288	0.848	0.874	0.326595
Rpl4	0.0415955	0.195998	1	1	0.326595
Fibin	0.0416229	-0.321794	0.196	0.261	0.326595
2022-03-02	0.0417779	0.341595	0.565	0.345	0.327483
Magoh	0.0421866	0.404133	0.978	0.916	0.330356
Casp8ap2	0.0422474	0.337002	0.717	0.412	0.330501
Smarca2	0.0423961	0.509171	0.587	0.403	0.331333
Lbp	0.0424824	0.637848	0.674	0.378	0.33143
Prrc2a	0.0424932	0.475785	0.696	0.672	0.33143
Mthfd2l	0.0426238	0.362695	0.674	0.571	0.33205
Pole3	0.0426576	0.356006	0.761	0.756	0.33205
Dazap1	0.0427798	0.402018	0.891	0.824	0.33263
Car12	0.0428171	0.395485	0.391	0.218	0.33263
Gm13305	0.0429768	-0.171253	0.196	0.345	0.33354
Atp5g1	0.0430626	0.432604	1	0.992	0.333874
Notch1	0.0431099	0.44839	0.674	0.487	0.333909
Hadha	0.043283	0.416222	0.826	0.748	0.334919
Pik3c2a	0.0433607	0.397322	0.587	0.429	0.335188
Polr2j	0.0434814	0.400573	0.891	0.916	0.335676
Tmem9	0.0435096	0.454991	0.783	0.681	0.335676
Cox19	0.0435797	0.382274	0.717	0.613	0.335885
Rbm28	0.0436305	0.368347	0.717	0.597	0.335947
Pi4k2a	0.0437465	0.331443	0.565	0.378	0.336509
Nup54	0.0437911	0.335587	0.543	0.336	0.336521
Cib2	0.0438498	0.304402	0.5	0.294	0.336586
Sec61a1	0.0439617	0.432539	0.674	0.58	0.336586
Gatsl2	0.0439831	0.416025	0.457	0.227	0.336586
Cep164	0.0439941	0.390866	0.696	0.622	0.336586
Pdzd2	0.044029	0.587577	0.5	0.261	0.336586
Nynrin	0.0440578	0.417678	0.543	0.361	0.336586
Utp20	0.0441143	-0.10161	0.261	0.403	0.336689
Ndufb10	0.0442773	0.458866	0.935	0.916	0.337422
Me2	0.0443386	0.342076	0.478	0.176	0.337422
Rab14	0.0443805	0.489038	0.957	0.933	0.337422
Mapk1ip1l	0.0443829	0.354663	0.696	0.546	0.337422
Kif5b	0.0444825	0.487447	0.935	0.908	0.337851
Iws1	0.044608	0.407109	0.609	0.563	0.338469
Sulf2	0.0446709	0.383749	0.391	0.143	0.338469
Pum1	0.0446937	0.487579	0.783	0.84	0.338469
Wapl	0.0447944	0.444772	0.674	0.756	0.338752
Rell1	0.0448361	0.607818	0.326	0.261	0.338752
Hdgf	0.0449208	0.169177	0.935	0.966	0.338752
Rpl6	0.0449614	0.259072	1	1	0.338752
Pcgf2	0.0449685	0.339922	0.457	0.227	0.338752
Nudt21	0.045002	0.380671	0.913	0.891	0.338752
Sesn3	0.0450341	0.4723	0.63	0.462	0.338752
Tmem165	0.0452526	0.401916	0.913	0.798	0.339888
Ghr	0.0453004	0.444934	0.674	0.504	0.339888
Gorasp2	0.0453155	0.378832	0.587	0.487	0.339888
Ephx2	0.0453882	-0.168435	0.239	0.37	0.340107
Msto1	0.0457045	0.298396	0.457	0.311	0.341984
Pcdh17	0.0457261	-0.357851	0.065	0.235	0.341984
Camta1	0.045797	0.354499	0.587	0.412	0.342187
Rab1a	0.0458527	0.434593	0.783	0.748	0.342276
Mark3	0.045923	0.416733	0.891	0.765	0.342475
Psmb3	0.0460521	0.409451	0.957	0.983	0.343045
Phc3	0.0461354	0.357978	0.5	0.328	0.343045
2300009A05Rik	0.0461398	0.351826	0.652	0.538	0.343045
Txndc12	0.0461749	0.35659	0.652	0.588	0.343045
Zbtb20	0.0463032	0.57272	0.739	0.706	0.343672
Cenpw	0.0464504	0.418723	0.478	0.277	0.344091
Ppib	0.0465177	0.428231	1	0.992	0.344091
Txn2	0.0465262	0.397097	0.913	0.832	0.344091
Ran	0.0465357	0.378975	1	1	0.344091
Capn6	0.0465865	0.37446	0.37	0.202	0.344142
0610010K14Rik	0.0467115	0.372174	0.543	0.378	0.344432
Cldn5	0.0467355	0.883041	0.457	0.185	0.344432
Evi5	0.0467579	0.425754	0.761	0.815	0.344432
Cavin3	0.0469702	0.568687	0.435	0.235	0.344897
Emilin1	0.046971	0.360144	0.435	0.202	0.344897
Cks2	0.0470287	0.428293	0.674	0.706	0.344897
Cox6a1	0.0470516	0.413681	1	0.992	0.344897
Arf3	0.0470545	0.393211	0.565	0.521	0.344897
Uqcrfs1	0.0470855	0.405443	0.978	0.966	0.344897
Foxc2	0.0471789	0.493057	0.348	0.227	0.345258
Eml4	0.0472993	0.365969	0.5	0.387	0.345721
Swi5	0.0473661	0.405352	0.935	0.958	0.345721
Txnrd2	0.0474017	0.363945	0.413	0.303	0.345721
Mnat1	0.0474367	0.37688	0.739	0.655	0.345721
Pcbp1	0.0474631	0.42051	0.978	0.983	0.345721
Zfp771	0.0476233	0.389331	0.761	0.756	0.346247
Rtf1	0.0476239	0.415044	0.913	0.899	0.346247
Gstm1	0.0477288	0.625352	0.652	0.529	0.346687
mt-Co2	0.0478035	0.436512	1	1	0.346908
Map4k4	0.0480846	0.563366	0.696	0.689	0.347753
Trnt1	0.0480924	0.369205	0.761	0.529	0.347753
Oaf	0.0480963	0.352645	0.587	0.361	0.347753
Wdr26	0.0480977	0.459495	0.717	0.79	0.347753
Tspan15	0.0481893	0.627709	0.348	0.134	0.348093
Plcb1	0.0482674	0.354102	0.5	0.378	0.348094
mt-Nd2	0.0483215	0.421891	1	0.992	0.348094
Mrps15	0.0483229	0.390208	0.891	0.84	0.348094
Pwwp2a	0.0487688	0.342857	0.652	0.546	0.350983
Sh3bgrl	0.048866	0.392825	0.717	0.546	0.351194
Wdr83os	0.048888	0.435016	0.826	0.748	0.351194
Ctdsp2	0.0489748	0.462875	0.739	0.689	0.351379
Sem1	0.0490035	0.403076	0.957	0.983	0.351379
Mydgf	0.0490694	0.382208	0.891	0.899	0.35153
Brwd1	0.0491513	0.418396	0.565	0.445	0.351794
Ubl3	0.049243	0.47331	0.609	0.496	0.352128
Fbxw8	0.049288	0.307979	0.5	0.218	0.352128
Cfap36	0.0493976	0.401916	0.783	0.765	0.352589
Akr1b3	0.0495155	0.353299	0.761	0.563	0.35289
Tmem159	0.04953	0.323584	0.457	0.202	0.35289
Galnt1	0.0497098	0.375676	0.587	0.454	0.353849
Taldo1	0.0498518	0.41064	0.913	0.941	0.354537
Pspc1	0.0500447	0.323086	0.63	0.496	0.355586
Nphs1	0.0501686	0.673973	0.326	0.218	0.355747
Tuba1c	0.0502184	-0.14813	0.261	0.361	0.355747
Baiap2	0.0502201	0.356865	0.478	0.328	0.355747
Mmp2	0.0502493	0.477576	0.391	0.109	0.355747
Klf7	0.050463	0.547142	0.587	0.496	0.356937
Bok	0.0505086	0.626143	0.609	0.319	0.356937
Napsa	0.0505883	0.35975	0.261	0.227	0.357177
Sf3b4	0.0506921	0.35829	0.783	0.58	0.357587
Llgl2	0.0507725	0.380395	0.457	0.269	0.357832
Tns3	0.0508558	0.436462	0.543	0.462	0.358039
F3	0.0508935	-0.273293	0.196	0.303	0.358039
Irx5	0.0510231	-0.261654	0.261	0.336	0.358337
Tnrc6b	0.0510476	0.485594	0.783	0.655	0.358337
Got1	0.051115	0.381388	0.674	0.42	0.358337
Meis1	0.0511788	0.468056	0.413	0.218	0.358337
Ckb	0.0512207	0.625986	0.37	0.202	0.358337
Zwint	0.051237	0.36718	0.935	0.588	0.358337
Ptprd	0.0512565	0.518349	0.413	0.261	0.358337
Cops8	0.0513174	0.367877	0.804	0.756	0.358443
Mrgbp	0.0514651	0.307485	0.565	0.37	0.359154
Iqgap1	0.0515616	0.610975	0.761	0.639	0.359373
Bex1	0.0515883	0.418347	0.783	0.622	0.359373
Smyd3	0.051638	-0.106239	0.283	0.378	0.359398
Zranb1	0.0518554	0.37096	0.609	0.605	0.360591
Amer1	0.0519038	0.315707	0.565	0.395	0.360607
Ndufa2	0.0519848	0.45505	0.913	0.966	0.36085
Srp9	0.0521274	0.392154	0.891	0.941	0.36105
Hmgcl	0.0521279	0.382208	0.609	0.462	0.36105
Ppfia1	0.0521522	0.368086	0.63	0.597	0.36105
Tmed1	0.05225	0.352	0.804	0.672	0.361296
Patz1	0.0523333	0.34341	0.478	0.361	0.361296
Taf1b	0.0524331	-0.10488	0.261	0.387	0.361296
Rpl35a	0.0525346	0.269139	1	1	0.361296
Tmed2	0.0525394	0.388724	0.87	0.933	0.361296
Prr5l	0.0526444	0.411486	0.413	0.168	0.361296
Zfp322a	0.0526463	0.366672	0.674	0.555	0.361296
Hnrnpdl	0.0526483	0.393786	0.935	0.882	0.361296
Zdhhc3	0.0526686	0.343464	0.565	0.437	0.361296
Mex3a	0.0526809	0.476024	0.674	0.639	0.361296
Cdk2	0.0526957	0.29872	0.413	0.168	0.361296
Itm2b	0.0529979	0.184386	0.957	0.983	0.363032
Rfc5	0.0530417	0.281726	0.5	0.261	0.363032
Pigs	0.0531374	0.367106	0.5	0.37	0.363055
Chst13	0.0531379	0.4164	0.304	0.143	0.363055
Bphl	0.0532119	0.414283	0.717	0.664	0.363154
Smndc1	0.0532473	0.338403	0.739	0.538	0.363154
Isca1	0.0532962	0.375783	0.457	0.286	0.363154
Tmem27	0.0533381	-0.218223	0.435	0.487	0.363154
Cenpa	0.0534318	0.572797	0.457	0.235	0.363476
Tmem234	0.0535355	0.440306	0.935	0.908	0.363865
Smim4	0.053596	0.375599	0.696	0.563	0.36396
Gstm2	0.0536529	0.590927	0.348	0.16	0.36403
Cbx3	0.0538751	0.407423	0.957	0.924	0.364987
Gpx7	0.0538939	0.394956	0.478	0.387	0.364987
Plekhg2	0.0539567	0.402842	0.457	0.303	0.364987
Cnot4	0.0539806	0.381388	0.565	0.487	0.364987
Nup62	0.0540809	0.312765	0.652	0.42	0.365349
Tmem37	0.0543646	0.812559	0.609	0.454	0.366949
Socs4	0.0545435	0.345304	0.5	0.361	0.36784
Mccc2	0.0546087	0.263527	0.543	0.269	0.367962
Krt8	0.0546784	0.179373	0.435	0.37	0.367963
Rpl8	0.0547029	0.337368	1	1	0.367963
Hat1	0.0550382	0.360367	0.783	0.613	0.369844
Jkamp	0.0550772	0.389979	0.739	0.723	0.369844
Mgst1	0.0551702	0.362006	0.674	0.605	0.370152
Rhog	0.0552557	0.29792	0.543	0.303	0.370325
Psma4	0.0552907	0.111735	0.935	0.975	0.370325
Hnrnpk	0.0554229	0.374915	1	1	0.370893
Tiparp	0.0554887	0.435318	0.413	0.218	0.371016
Armc10	0.0556362	0.320006	0.609	0.445	0.371684
Anapc16	0.0559665	0.375568	0.761	0.605	0.373572
Fads1	0.0560803	0.401374	0.413	0.16	0.373876
Fam173b	0.0561077	-0.142559	0.196	0.37	0.373876
Nedd8	0.0561898	0.447761	0.978	0.992	0.374104
Slc22a23	0.0562454	0.389262	0.261	0.244	0.374156
Osbp	0.0563001	0.379438	0.37	0.227	0.374202
Cachd1	0.0563922	0.354102	0.565	0.37	0.374496
Ggt1	0.0565145	-0.189977	0.522	0.681	0.374745
Elovl1	0.0565254	0.317627	0.522	0.353	0.374745
1700025G04Rik	0.056595	0.383215	0.435	0.277	0.374888
Calml4	0.0567253	-0.187871	0.696	0.655	0.375135
Mrpl58	0.0567282	0.423263	0.87	0.891	0.375135
Btd	0.0568036	0.378217	0.457	0.345	0.375316
Eif3m	0.0569723	0.415888	0.978	0.958	0.375832
Col18a1	0.0570333	0.863333	0.848	0.815	0.375832
Cdc20	0.0570373	0.461902	0.37	0.193	0.375832
Afp	0.0570738	0.456289	0.348	0.185	0.375832
Tsc22d1	0.0573615	0.835088	0.978	0.941	0.376811
Pabpc1	0.0574103	0.462277	0.957	0.983	0.376811
Lsm6	0.0574131	0.419854	0.826	0.832	0.376811
Asap1	0.0574197	0.459425	0.891	0.723	0.376811
Palm3	0.0574633	0.516268	0.587	0.412	0.376811
Ptk2	0.0576115	0.311402	0.543	0.345	0.377467
Rps27	0.0578928	0.403716	1	1	0.378397
Timm22	0.0578936	0.377136	0.696	0.731	0.378397
Helz	0.0579235	0.467055	0.696	0.706	0.378397
Phldb2	0.057951	0.116075	0.761	0.908	0.378397
Vbp1	0.0579955	0.356707	0.717	0.664	0.378397
Metrn	0.0583554	0.345528	0.435	0.16	0.3803
Coq2	0.0584106	0.328794	0.739	0.555	0.3803
Asf1a	0.0584329	0.337378	0.739	0.546	0.3803
Rfc4	0.0584928	0.335044	0.609	0.437	0.380374
Atf6b	0.0585432	0.318296	0.522	0.387	0.380385
Cdca8	0.058614	0.497615	0.348	0.193	0.380529
Fbxo34	0.058727	0.330457	0.413	0.193	0.380703
Tab2	0.0587382	0.482103	0.63	0.597	0.380703
Cenpb	0.0588009	0.388303	0.761	0.681	0.380794
Dync1h1	0.058856	0.475656	0.739	0.689	0.380836
Dpm3	0.0589946	0.44122	0.804	0.866	0.381417
Apoo	0.0591024	0.348525	0.522	0.462	0.381799
Gja1	0.0593999	0.438045	0.543	0.412	0.383404
Hras	0.0595389	0.427517	0.913	0.849	0.383523
Stk32b	0.0595432	-0.279158	0.065	0.261	0.383523
Ak3	0.0595654	0.352645	0.63	0.58	0.383523
Rpl22l1	0.059834	0.237766	0.978	0.992	0.384935
Pcm1	0.0599136	0.502638	0.87	0.874	0.385131
Dennd5b	0.0600887	0.387955	0.457	0.303	0.385868
Dpf2	0.060127	0.359989	0.587	0.538	0.385868
Cuta	0.0602778	0.399081	0.935	0.891	0.386234
Timm17a	0.0602826	0.389013	0.87	0.874	0.386234
1110032A03Rik	0.0603899	0.332236	0.543	0.353	0.386604
Pdzk1	0.0605832	0.598506	0.587	0.353	0.387498
Rpl38	0.0606286	0.349687	1	1	0.387498
Ints14	0.0606935	0.310445	0.457	0.319	0.387596
Lrp6	0.060942	0.400436	0.761	0.63	0.388866
Parva	0.0609998	0.392939	0.63	0.563	0.388917
Pltp	0.0611636	0.710933	0.391	0.202	0.389644
Cyfip1	0.0613428	0.406867	0.717	0.672	0.390359
Fcgrt	0.0613757	0.593807	0.5	0.294	0.390359
Ece1	0.0614742	0.325053	0.413	0.261	0.39039
Eif4e	0.0614802	0.371745	0.761	0.714	0.39039
Glt8d1	0.0617529	0.345111	0.674	0.555	0.391803
Relb	0.0619657	-0.241656	0.109	0.261	0.392815
Acot2	0.0620128	0.351646	0.5	0.353	0.392815
Fads3	0.0621556	0.331443	0.478	0.193	0.393401
Chchd10	0.0622224	0.478405	0.935	0.899	0.393505
Rbm42	0.0625641	0.366286	0.717	0.697	0.395142
Sap30bp	0.0625822	0.334296	0.565	0.513	0.395142
Spata24	0.0626886	0.318979	0.565	0.328	0.395495
Mbnl1	0.0628801	0.375118	0.5	0.387	0.396383
Hoxb9	0.0629699	0.556032	0.739	0.639	0.396559
Chmp4b	0.0630278	0.456702	0.739	0.824	0.396559
Ccnk	0.063073	0.379438	0.413	0.235	0.396559
Nans	0.0631257	0.330094	0.609	0.513	0.396559
Prrc2c	0.0631616	0.535154	0.957	0.941	0.396559
Elavl1	0.0632388	0.3426	0.957	0.815	0.396726
Ppp1r11	0.0633837	0.376755	0.848	0.782	0.397076
Rpl22	0.0634882	0.243342	0.978	1	0.397076
Tchp	0.0636621	0.325898	0.457	0.252	0.397076
Skiv2l2	0.0636818	0.332095	0.696	0.529	0.397076
Pih1d1	0.063687	0.376051	0.609	0.58	0.397076
Srsf10	0.0637044	0.389724	0.935	0.849	0.397076
Fmnl2	0.0638199	0.325898	0.391	0.277	0.397076
Glis3	0.0638389	0.331443	0.457	0.303	0.397076
Hspb11	0.0638651	0.407617	0.587	0.538	0.397076
Cyb5a	0.0638729	0.398498	0.957	0.924	0.397076
Aldob	0.0638989	0.786789	0.413	0.328	0.397076
Tead1	0.0639404	0.460411	0.783	0.697	0.397076
Metap2	0.0639544	0.417487	0.957	0.975	0.397076
Smtnl2	0.064028	0.564562	0.587	0.471	0.397217
Dnajb1	0.0641698	0.328209	0.543	0.328	0.397782
Samhd1	0.0642869	0.333173	0.435	0.336	0.398
Ywhae	0.0643068	0.465886	1	1	0.398
Prpf3	0.0645319	0.336888	0.435	0.252	0.398884
Lgals3	0.0645516	-0.30861	0.152	0.244	0.398884
Rrm2	0.0648221	0.353795	0.348	0.227	0.400239
Arfgef1	0.0649178	0.447531	0.63	0.622	0.400514
Cwc27	0.065322	0.344346	0.587	0.471	0.402321
Usp1	0.0653507	0.408158	0.674	0.529	0.402321
Tubg1	0.0653649	0.336116	0.565	0.42	0.402321
Haus7	0.0654984	0.280063	0.63	0.37	0.402826
Rad21	0.0655811	0.451886	0.717	0.697	0.403017
Mpped2	0.0656722	0.377294	0.609	0.437	0.403102
Cnot3	0.065698	0.363981	0.826	0.807	0.403102
Msmo1	0.0658028	0.375725	0.543	0.244	0.403355
Mafb	0.0658424	0.733608	0.283	0.109	0.403355
Espn	0.066093	0.426411	0.391	0.193	0.404435
Eif3a	0.066122	0.450455	0.957	0.983	0.404435
Zfp568	0.0662339	0.348584	0.37	0.252	0.404803
Alkbh7	0.0663012	0.312212	0.565	0.445	0.404898
Cldn2	0.06641	0.61401	0.217	0.16	0.405126
Psap	0.0664445	0.552548	0.848	0.84	0.405126
Snrpa	0.0665088	0.396002	0.891	0.824	0.405126
Spg7	0.0665457	0.337002	0.522	0.513	0.405126
Ranbp9	0.0666406	0.301298	0.543	0.37	0.405388
Cdkn1a	0.0667765	-0.109597	0.283	0.403	0.405816
Npc2	0.0668146	0.516795	0.891	0.882	0.405816
Rrm1	0.0669083	0.334722	0.435	0.361	0.40607
Suclg2	0.0669608	0.530751	0.783	0.723	0.406073
Ndufv1	0.0670782	0.340551	0.87	0.866	0.40647
Ybx3	0.0672012	0.380504	0.957	0.958	0.4066
Tspan18	0.067237	0.407961	0.522	0.42	0.4066
Psma3	0.0672555	0.415307	0.935	0.966	0.4066
Mnd1	0.0674381	-0.157886	0.326	0.387	0.407149
Epn1	0.067453	0.395369	0.761	0.697	0.407149
Rif1	0.0675116	0.362695	0.739	0.597	0.407149
Abtb1	0.0675742	0.297075	0.37	0.244	0.407149
Ifitm3	0.0677237	0.330538	0.478	0.202	0.407149
Myo5b	0.0678275	0.501532	0.783	0.748	0.407149
Rai1	0.0678866	0.336888	0.391	0.269	0.407149
Nes	0.0679464	0.70861	0.609	0.395	0.407149
Cpt2	0.0680399	0.318979	0.478	0.353	0.407149
Tmx2	0.0680458	0.327757	0.696	0.529	0.407149
Galk2	0.068099	0.359875	0.587	0.479	0.407149
Eif4g2	0.0681365	0.520086	0.957	0.992	0.407149
Psmg4	0.0681611	0.368975	0.696	0.63	0.407149
Uri1	0.068162	0.340223	0.783	0.597	0.407149
4930402H24Rik	0.0681712	0.343513	0.522	0.462	0.407149
Ing5	0.0681791	0.292182	0.435	0.168	0.407149
Akt2	0.0682865	0.335807	0.565	0.445	0.40748
Ppp2ca	0.0685653	0.370971	0.978	0.95	0.408831
Naaa	0.0687451	0.373167	0.478	0.277	0.409591
Guk1	0.0688012	0.370055	0.891	0.773	0.409613
H1f0	0.0691795	0.447718	0.848	0.798	0.411552
Arhgef2	0.0693993	0.406547	0.413	0.336	0.412546
Lrp2	0.0694659	0.572168	0.587	0.479	0.412556
Ptpra	0.069527	0.363525	0.652	0.613	0.412556
Il17rd	0.0695592	0.283722	0.587	0.353	0.412556
Ntan1	0.0697989	0.381927	0.848	0.756	0.413472
Rab11a	0.0698292	0.132889	0.978	0.941	0.413472
Tmem251	0.0698722	0.304402	0.457	0.319	0.413472
Atp6v1d	0.0703186	0.376682	0.783	0.664	0.415618
Timm17b	0.0703411	0.420144	0.826	0.782	0.415618
Zfp950	0.0704057	0.309603	0.717	0.462	0.415686
Ctnnal1	0.0705729	0.416708	0.5	0.395	0.415737
Pogk	0.0706053	0.315154	0.478	0.319	0.415737
Prodh2	0.0706204	0.367336	0.283	0.218	0.415737
Stxbp4	0.0706269	0.321125	0.543	0.269	0.415737
Cep126	0.0708091	0.293181	0.457	0.143	0.416103
Cspg4	0.0708379	0.422415	0.37	0.244	0.416103
Emd	0.0708821	0.363495	0.739	0.63	0.416103
Sympk	0.0709026	0.304837	0.63	0.429	0.416103
Cacfd1	0.0709551	0.344346	0.435	0.345	0.416103
Zbtb7a	0.071079	0.45726	0.587	0.622	0.416518
Plrg1	0.0711411	0.303855	0.826	0.529	0.41657
Camk2g	0.0715628	0.275797	0.457	0.286	0.418373
Adrm1	0.0715953	0.396978	0.891	0.773	0.418373
Sf3b5	0.0716151	0.407396	0.913	0.933	0.418373
Pex6	0.071663	0.316578	0.761	0.521	0.418373
Tmem107	0.0718062	0.328209	0.5	0.361	0.418896
Fam193b	0.0721562	0.305344	0.587	0.395	0.420238
D10Jhu81e	0.0722091	0.31921	0.804	0.58	0.420238
Rnf19a	0.0722305	0.346166	0.457	0.395	0.420238
Sqstm1	0.072302	0.366406	0.674	0.622	0.420238
Zfp61	0.0723047	0.250414	0.478	0.21	0.420238
Ube2s	0.0726584	0.511908	0.957	0.933	0.42198
Fut9	0.0729247	-0.122488	0.261	0.395	0.423212
Dnajc3	0.0730289	0.424135	0.739	0.655	0.423503
Chchd3	0.0732353	0.361325	0.804	0.681	0.424385
Gmnn	0.0733724	0.323856	0.609	0.412	0.42458
Phc2	0.0733776	0.326928	0.696	0.555	0.42458
Cdc42ep5	0.0735918	-0.137821	0.217	0.336	0.425505
Smarce1	0.0738065	0.411742	0.935	0.891	0.426432
2610037D02Rik	0.0739687	0.335296	0.543	0.387	0.426672
Rab9	0.073989	0.335296	0.696	0.521	0.426672
Sparc	0.0740578	1.04679	0.957	0.824	0.426672
Ergic3	0.0741281	0.408994	0.957	0.924	0.426672
Atp2b1	0.0741611	0.495077	0.848	0.765	0.426672
Trp53i13	0.0741754	0.289084	0.435	0.269	0.426672
Scaf4	0.0743063	0.360283	0.435	0.294	0.426904
Tcf21	0.0743249	0.31796	0.391	0.21	0.426904
Rab4a	0.0744798	0.323181	0.543	0.395	0.427304
Rab22a	0.0745038	0.38478	0.565	0.462	0.427304
Prrc2b	0.0745921	0.367877	0.739	0.513	0.427308
Lancl1	0.0746137	0.322575	0.478	0.395	0.427308
Dcaf4	0.0747733	0.287918	0.457	0.269	0.427691
Ogfr	0.0747899	0.366068	0.783	0.664	0.427691
Tpt1	0.0751466	0.250203	1	1	0.429041
D030045P18Rik	0.0751542	-0.207849	0.283	0.328	0.429041
Nup85	0.0752037	0.283652	0.457	0.202	0.429041
Arhgef12	0.0752453	0.573049	0.674	0.639	0.429041
Fam3c	0.0755379	0.352251	0.674	0.521	0.430395
Lcorl	0.0755993	0.390866	0.5	0.37	0.430432
Anapc13	0.0756766	0.395874	0.935	0.924	0.430559
Hyou1	0.0758062	0.280324	0.565	0.361	0.430983
Bri3	0.075922	0.386985	0.957	0.975	0.431327
Hgsnat	0.0761625	-0.105571	0.239	0.387	0.432058
Spint1	0.0761777	-0.143616	0.304	0.42	0.432058
Pkm	0.0762163	0.125057	0.978	1	0.432058
Tbrg1	0.076606	0.441056	0.891	0.882	0.433953
Eftud2	0.0768109	0.351951	0.717	0.622	0.434798
Prpf4b	0.0770656	0.454288	0.913	0.95	0.435665
Banf1	0.0770753	0.398595	0.913	0.882	0.435665
Gm8186	0.0773568	0.332026	0.739	0.597	0.436666
Dazap2	0.077364	0.371652	0.696	0.723	0.436666
Rai14	0.0774792	0.598262	0.717	0.487	0.436902
Crat	0.0775668	0.328562	0.413	0.21	0.436902
Cxcl12	0.0775734	0.699168	0.239	0.118	0.436902
Psmb4	0.0777799	0.400942	1	0.958	0.43775
Wsb1	0.0780007	0.351745	0.5	0.437	0.438508
Ppp6r3	0.0780422	0.340107	0.522	0.479	0.438508
Phf20	0.0781597	0.391895	0.587	0.622	0.438508
Nelfb	0.0781925	0.324955	0.826	0.563	0.438508
Zhx1	0.0782206	0.314493	0.457	0.328	0.438508
Txnip	0.078343	0.4329	0.435	0.303	0.438508
Scrn1	0.0783449	0.382498	0.37	0.176	0.438508
Enah	0.0783631	0.510459	0.87	0.706	0.438508
Luzp1	0.0784534	0.390077	0.87	0.697	0.43852
Sf3a3	0.0784772	0.374059	0.957	0.782	0.43852
Ssb	0.0785337	0.406204	0.935	0.975	0.438522
9530068E07Rik	0.0787543	0.354833	0.848	0.798	0.43872
Dnajc30	0.0787843	0.353042	0.652	0.546	0.43872
Erf	0.0787932	0.357876	0.522	0.471	0.43872
Nectin3	0.0788146	0.619628	0.696	0.513	0.43872
Chd2	0.0788495	0.400926	0.63	0.597	0.43872
Kpna1	0.0791318	0.309825	0.478	0.311	0.439788
1700021F05Rik	0.0791539	0.348487	0.609	0.58	0.439788
Nudt16l1	0.0793296	0.312905	0.63	0.454	0.440451
Smap1	0.0794145	0.469179	0.848	0.857	0.44061
Tmem167	0.0794809	0.422678	0.87	0.899	0.440666
Ech1	0.0795809	0.470293	0.826	0.815	0.440908
Pank1	0.0796373	0.325654	0.609	0.395	0.440908
Xpo7	0.0797721	0.312212	0.587	0.445	0.441341
Trim8	0.0798882	0.347849	0.543	0.42	0.441613
Tcf7l1	0.079934	0.365088	0.435	0.277	0.441613
Adamts1	0.0801345	0.760726	0.957	0.84	0.442408
Dynll1	0.0802113	0.511147	0.978	1	0.44252
Pkdcc	0.0803587	0.468807	0.761	0.496	0.443021
Rbm45	0.0806748	-0.14813	0.174	0.345	0.4444
Gpr180	0.0807224	0.269311	0.543	0.319	0.4444
Fkbp8	0.0808257	0.367831	0.891	0.908	0.444655
Trappc13	0.0811928	0.311138	0.565	0.462	0.446063
Ptprs	0.0812397	0.498941	0.783	0.731	0.446063
Sall2	0.0812527	0.301298	0.5	0.378	0.446063
Fam96b	0.0814564	0.36936	0.87	0.782	0.446727
Slbp	0.0814879	0.335113	0.783	0.664	0.446727
Idh1	0.0816357	0.542639	0.761	0.58	0.446951
Ptpn11	0.081643	0.417535	0.652	0.605	0.446951
Stx16	0.0817626	0.336116	0.696	0.613	0.447099
Ckap4	0.0817843	0.474949	0.804	0.824	0.447099
Acat2	0.0820021	0.277138	0.652	0.445	0.447487
Anapc5	0.0820266	0.371553	0.87	0.941	0.447487
Mrpl43	0.0820944	0.392228	0.87	0.79	0.447487
Camk1	0.0821123	0.361235	0.652	0.647	0.447487
Ndn	0.0821413	0.441869	0.739	0.655	0.447487
Sri	0.0822893	0.145218	0.891	0.95	0.447981
Api5	0.0824945	0.346566	0.63	0.546	0.448786
Gtf2i	0.0825676	0.462043	0.826	0.849	0.448872
Gstt2	0.0826556	0.361596	0.478	0.345	0.449038
Eya4	0.0829302	0.497476	0.391	0.118	0.449387
Tmem127	0.0829373	0.315984	0.391	0.227	0.449387
Dtl	0.0830079	0.386168	0.413	0.21	0.449387
Atf4	0.0830911	0.394777	0.783	0.681	0.449387
Bicd2	0.0830912	0.400883	0.326	0.227	0.449387
Pnn	0.0831002	0.419987	0.957	0.933	0.449387
Ablim1	0.0831219	0.375854	0.348	0.21	0.449387
Usp11	0.0832931	0.330666	0.5	0.445	0.449698
Polr2f	0.0832945	0.36989	0.891	0.916	0.449698
Ostc	0.0835027	0.396376	0.891	0.891	0.450512
Raly	0.0840235	0.368459	0.891	0.874	0.452349
Ago2	0.0840429	0.395341	0.565	0.496	0.452349
Tbca	0.0840665	0.391386	0.978	0.992	0.452349
Pdpn	0.0840745	0.44216	0.348	0.101	0.452349
Gpbp1	0.0845046	0.34684	0.804	0.664	0.45435
Mpv17l2	0.0845828	0.311079	0.435	0.286	0.454458
Nsd2	0.0849145	0.409579	0.63	0.504	0.455773
Hdac6	0.0849441	0.29202	0.565	0.336	0.455773
Ilf3	0.0851718	0.348307	0.761	0.605	0.456483
Gpc1	0.0852503	0.311402	0.391	0.176	0.456483
Gas8	0.0852514	0.296901	0.761	0.504	0.456483
Sik3	0.0854419	0.353183	0.478	0.294	0.45719
Aplp2	0.0861248	0.505494	0.913	0.84	0.460529
Col26a1	0.0862293	0.456668	0.37	0.109	0.460773
Ewsr1	0.0863867	0.388334	0.935	0.95	0.461145
Nsmce2	0.0864169	0.37935	0.696	0.647	0.461145
Zfp36l1	0.0866911	0.655683	0.913	0.882	0.462293
Atp6v0b	0.0868329	0.144129	0.848	0.966	0.46265
Ubac2	0.0868763	0.326647	0.587	0.504	0.46265
Ext1	0.0869632	0.517988	0.587	0.538	0.462772
Pcolce	0.0870184	0.429504	0.413	0.176	0.462772
Bora	0.0870767	0.323584	0.37	0.218	0.462772
Prr5	0.0871818	0.443437	0.391	0.286	0.463017
Abhd16a	0.0874066	0.382498	0.63	0.588	0.463895
Rnf126	0.0874743	0.3355	0.717	0.622	0.463915
Riok1	0.0875289	0.350229	0.696	0.58	0.463915
Lats1	0.0876327	0.294149	0.435	0.286	0.464151
Unc5c	0.0877812	0.704185	0.283	0.109	0.464613
Dxo	0.0878387	0.305862	0.522	0.395	0.464613
Fam168a	0.087904	0.342695	0.543	0.496	0.464641
Trmt10c	0.0879628	0.263166	0.522	0.345	0.464641
Trrap	0.0880413	0.344346	0.609	0.496	0.464742
Gm26917	0.0882069	-0.160071	0.565	0.571	0.465302
Ino80d	0.0883226	0.339856	0.435	0.395	0.465598
Snrpd1	0.0884798	0.377913	1	0.975	0.465817
Btbd10	0.0884832	0.291236	0.391	0.218	0.465817
Strap	0.0886486	0.349019	0.87	0.832	0.465878
Ndufa1	0.0887871	0.400589	0.87	0.874	0.465878
Crk	0.088823	0.358626	0.478	0.42	0.465878
Nfyc	0.0888291	0.301138	0.63	0.412	0.465878
Itm2a	0.0888366	0.354499	0.304	0.336	0.465878
Cs	0.0888522	0.365643	0.783	0.639	0.465878
Gm17018	0.0889684	0.323677	0.783	0.672	0.466176
Gadd45gip1	0.0890648	0.381173	0.761	0.756	0.466368
Yipf4	0.0891982	0.316758	0.674	0.605	0.466754
Mknk2	0.0892613	0.332298	0.457	0.353	0.466772
Gnas	0.0894006	0.480177	0.978	1	0.467188
Rps19	0.0899113	0.236513	1	1	0.469544
Avl9	0.0906002	0.305862	0.565	0.403	0.472166
Hnrnpc	0.0906049	0.375583	0.978	0.966	0.472166
Hmgxb4	0.0906369	0.336953	0.478	0.336	0.472166
Dpp9	0.0907029	0.30082	0.587	0.403	0.472166
Fbxo18	0.0907272	0.287794	0.587	0.454	0.472166
Man1a2	0.0908075	0.427053	0.826	0.756	0.472166
Msra	0.0908359	0.278097	0.435	0.193	0.472166
Fam174b	0.0910341	-0.307558	0.152	0.235	0.472742
Crabp1	0.0910854	0.351364	0.348	0.076	0.472742
Cdk1	0.0912394	0.439656	0.348	0.303	0.472742
Abcb6	0.0912695	0.270758	0.413	0.235	0.472742
Pank3	0.0912766	0.331443	0.413	0.168	0.472742
Syne2	0.0913283	0.147851	0.739	0.866	0.472742
Osr2	0.0913699	0.655818	0.826	0.739	0.472742
Usb1	0.0914943	0.236995	0.391	0.235	0.473073
Fam32a	0.0917619	0.362695	0.891	0.807	0.474144
Hars2	0.0918252	0.312395	0.5	0.227	0.474158
Orc6	0.0918891	0.313424	0.609	0.504	0.474174
Rnf4	0.0919903	0.34945	0.587	0.513	0.474384
Gclc	0.0923204	-0.169544	0.326	0.353	0.475772
Smg1	0.0924004	0.336116	0.5	0.387	0.475871
U2af1	0.0925512	0.349541	0.957	0.924	0.476334
Mpst	0.0926545	0.395052	0.739	0.647	0.476459
Rtl8b	0.0926973	0.469668	0.435	0.244	0.476459
Rab2a	0.0928324	0.137005	0.957	0.933	0.47684
Cplx2	0.0929589	-0.173448	0.087	0.294	0.477177
Cxcl1	0.093551	-0.515855	0.087	0.134	0.479901
Dbnl	0.0936784	0.344911	0.761	0.697	0.48024
Proser1	0.0938065	0.325654	0.543	0.42	0.480581
Krtcap2	0.0938935	0.387736	0.87	0.908	0.480712
Tnks	0.094009	0.330607	0.435	0.311	0.480989
Cpb2	0.0941458	-0.179788	0.522	0.597	0.481374
Lman2l	0.0944858	0.288297	0.478	0.252	0.482797
1810037I17Rik	0.0947647	0.683061	0.739	0.782	0.483906
Chic2	0.0950905	0.306932	0.761	0.622	0.484989
Riok2	0.0951008	0.297744	0.565	0.429	0.484989
Fbxo11	0.0954542	0.297744	0.587	0.437	0.486183
Zcchc14	0.0955517	0.336888	0.348	0.277	0.486183
Gdf11	0.095611	0.28331	0.435	0.218	0.486183
Mrpl28	0.0956412	0.358589	0.913	0.882	0.486183
Rack1	0.0956457	0.200017	1	1	0.486183
Rufy2	0.0959149	0.269914	0.5	0.252	0.487235
Atp5b	0.0959938	0.403878	1	1	0.48732
Uggt1	0.0962645	0.305537	0.413	0.277	0.488377
Rnps1	0.0963773	0.359118	0.826	0.714	0.488632
Mapt	0.0964524	0.427234	0.283	0.118	0.488697
Tma16	0.0965738	0.303855	0.587	0.361	0.488995
Mgat1	0.0966633	0.317353	0.543	0.412	0.489131
Dmap1	0.0968818	0.267385	0.63	0.479	0.489659
Eps15l1	0.0968929	0.269757	0.5	0.269	0.489659
Bfar	0.0971294	0.33655	0.717	0.672	0.490538
Sfr1	0.0972762	0.455736	0.913	0.966	0.490707
Robo2	0.0972883	0.470909	0.348	0.227	0.490707
Ndufs2	0.0976645	0.40292	0.957	0.941	0.492111
Vcan	0.0977519	0.401549	0.783	0.58	0.492111
Pip5k1c	0.0977656	0.382087	0.37	0.176	0.492111
Arl6ip6	0.09785	0.268146	0.609	0.437	0.492111
Prmt1	0.0978812	0.351075	0.978	0.992	0.492111
Foxp1	0.0980206	0.606863	0.609	0.681	0.492495
Cfl1	0.0982487	0.445375	1	0.992	0.493
Ptpn4	0.0982804	0.282336	0.435	0.311	0.493
Eif4b	0.0983101	0.111024	0.913	0.941	0.493
Uchl3	0.0983801	0.352891	0.848	0.807	0.493035
Dusp6	0.098566	-0.110991	0.217	0.328	0.49365
Rpl9	0.0986896	0.2659	1	1	0.493841
Acp1	0.0987304	0.372584	0.87	0.874	0.493841
Trabd2b	0.0988621	0.386168	0.413	0.176	0.494184
Flad1	0.0990203	-0.142265	0.239	0.319	0.494325
Lrrc14	0.099098	0.281726	0.457	0.277	0.494325
Pard3b	0.0991025	0.325543	0.435	0.303	0.494325
Cul7	0.0991431	0.365816	0.478	0.412	0.494325
Katnb1	0.0992121	0.289492	0.413	0.244	0.494354
Efna1	0.0992942	0.269914	0.5	0.252	0.494449
Ehmt2	0.0993772	0.377402	0.717	0.563	0.494547
Pcnt	0.0996867	0.27514	0.478	0.286	0.495772
Ckap5	0.100382	0.336584	0.5	0.445	0.498911
Nme1	0.100456	0.398661	0.978	0.983	0.498963
Vapb	0.100573	0.423537	0.674	0.63	0.499226
Mrps5	0.100898	0.3581	0.804	0.756	0.500293
Cox4i1	0.101023	0.402918	1	0.992	0.500293
Pef1	0.101042	0.257335	0.587	0.403	0.500293
Map1b	0.101044	0.776491	0.587	0.597	0.500293
Nrep	0.101243	0.502817	0.826	0.782	0.500849
Trappc11	0.101284	0.276505	0.457	0.244	0.500849
Rexo1	0.1014	0.316424	0.696	0.555	0.500938
Scaf8	0.10143	0.319855	0.5	0.403	0.500938
Prmt5	0.101593	0.332684	0.652	0.58	0.501426
Wdfy3	0.101676	0.350861	0.478	0.487	0.50152
Ino80e	0.101988	0.303855	0.565	0.487	0.502575
Cacnb3	0.102018	0.279808	0.587	0.336	0.502575
Car4	0.102335	0.525344	0.565	0.37	0.503513
Mapre1	0.102337	0.416259	0.87	0.882	0.503513
Ankrd13a	0.102488	0.321873	0.391	0.319	0.503937
Ppp1ca	0.102627	0.420425	0.978	1	0.504306
Med24	0.102721	0.327444	0.457	0.42	0.504448
Slc38a10	0.102966	0.321873	0.63	0.504	0.505337
Sod2	0.103073	0.111483	0.826	0.891	0.505541
Tmem120a	0.103161	0.342372	0.457	0.311	0.505555
Cdk2ap2	0.103205	0.359717	0.717	0.639	0.505555
Rpl7l1	0.103307	0.341824	0.935	0.84	0.505738
Lrrfip1	0.103459	-0.128899	0.326	0.336	0.506165
Cds1	0.103705	-0.141938	0.13	0.311	0.507052
Cdkn2aip	0.103941	0.310257	0.522	0.37	0.507887
Mga	0.104377	0.449521	0.674	0.605	0.509566
Gtf3c1	0.104414	0.365324	0.587	0.597	0.509566
Cby1	0.104613	0.290279	0.674	0.504	0.510098
Bcl2l13	0.104654	0.297455	0.522	0.319	0.510098
Flrt2	0.104924	0.367034	0.348	0.134	0.510791
Sgip1	0.104927	-0.130431	0.174	0.303	0.510791
Higd2a	0.105253	0.416276	0.848	0.924	0.511856
Uhrf1	0.105373	0.30805	0.391	0.286	0.511856
Tpr	0.1054	0.440336	0.978	0.992	0.511856
Polr2a	0.10545	0.529403	0.696	0.79	0.511856
Cuedc1	0.105574	0.285506	0.543	0.345	0.511856
Cenpm	0.105591	0.350117	0.348	0.151	0.511856
Ccnb1	0.10564	0.406478	0.348	0.126	0.511856
Zfp704	0.105669	0.461279	0.717	0.681	0.511856
Bmt2	0.105975	0.290125	0.5	0.378	0.512206
Rnf122	0.105989	0.282336	0.457	0.244	0.512206
Rad51d	0.106175	-0.118454	0.196	0.319	0.512206
Sin3a	0.106181	0.331443	0.413	0.303	0.512206
Ube2h	0.106267	0.455069	0.696	0.689	0.512206
Sp1	0.106312	0.318979	0.435	0.345	0.512206
Hadh	0.106346	0.389213	0.826	0.824	0.512206
Akr7a5	0.106362	0.400699	0.891	0.849	0.512206
Fancl	0.106395	0.257335	0.457	0.277	0.512206
Grk6	0.106438	0.22868	0.587	0.328	0.512206
Gstm7	0.106461	0.284003	0.37	0.185	0.512206
Ppp1r9b	0.107061	0.295075	0.413	0.277	0.514373
Ankfy1	0.107132	0.306728	0.413	0.261	0.514373
Rpl24	0.107198	0.27378	1	1	0.514373
Hells	0.107206	0.385387	0.391	0.311	0.514373
Cfap20	0.107241	0.358804	0.804	0.723	0.514373
Herc4	0.107319	0.293267	0.413	0.311	0.514434
Id3	0.107442	0.70054	0.935	0.849	0.514553
Sik1	0.10753	0.324776	0.413	0.345	0.514553
Cyp1b1	0.107582	0.498497	0.304	0.084	0.514553
Uba6	0.107633	0.280324	0.587	0.353	0.514553
Fam216a	0.107673	0.30101	0.696	0.546	0.514553
Calm1	0.108055	0.54656	1	0.983	0.516064
Sdhc	0.108159	0.386942	0.913	0.824	0.516175
Bex4	0.10821	0.459459	0.674	0.479	0.516175
Scn8a	0.108833	0.37117	0.391	0.151	0.518768
Pafah1b3	0.108891	0.37852	0.978	0.958	0.518768
Ppat	0.108953	0.314493	0.674	0.546	0.518768
Hdac4	0.109236	0.329497	0.37	0.193	0.519365
Atp2a2	0.10927	0.408404	0.848	0.739	0.519365
Hpf1	0.109277	0.336323	0.804	0.706	0.519365
Lnpep	0.11004	0.303855	0.435	0.311	0.522513
Evl	0.110073	0.350861	0.652	0.613	0.522513
Snrnp40	0.110203	0.336922	0.891	0.782	0.522666
Mlec	0.110239	0.405255	0.761	0.79	0.522666
Rock2	0.110327	0.55844	0.696	0.706	0.522765
Rnpep	0.110432	0.336262	0.587	0.462	0.522945
Npm3	0.11085	0.371545	0.87	0.782	0.52461
Rpl14	0.111375	0.257185	1	1	0.526774
Idh2	0.112026	0.420055	0.935	0.975	0.529532
Arfrp1	0.112226	0.289374	0.696	0.588	0.530161
Baz1a	0.112494	0.328431	0.522	0.353	0.531072
Ggnbp1	0.112568	-0.1544	0.109	0.286	0.531072
Rprd2	0.112623	0.291236	0.457	0.387	0.531072
Ccdc186	0.112696	0.303855	0.696	0.471	0.531096
BC017643	0.113025	0.231018	0.457	0.261	0.532328
Atad1	0.113096	0.295075	0.696	0.521	0.53234
Gatad2b	0.113369	0.366534	0.63	0.613	0.533306
Zfp451	0.113461	0.344346	0.587	0.471	0.533418
Svbp	0.113807	0.408812	0.891	0.882	0.534463
Man2a1	0.11382	0.264024	0.435	0.176	0.534463
Isoc1	0.114071	0.307831	0.739	0.597	0.535318
B4galt1	0.114178	0.279808	0.457	0.37	0.535499
Mad2l2	0.114489	0.280324	0.5	0.336	0.536638
Grip1	0.114796	0.335296	0.348	0.193	0.537755
Zcchc6	0.114974	0.339377	0.739	0.672	0.538266
Topbp1	0.11506	0.268385	0.587	0.353	0.538289
Rgmb	0.115117	0.264304	0.435	0.16	0.538289
Add1	0.115422	0.433893	0.674	0.706	0.539396
Ppih	0.115772	0.302592	0.674	0.521	0.540707
Mrpl49	0.116483	0.31937	0.717	0.639	0.543704
Zmynd11	0.116729	0.365643	0.696	0.664	0.544527
Tfcp2	0.117004	0.251329	0.522	0.311	0.545484
Dsp	0.11762	0.566693	0.63	0.42	0.547666
Nde1	0.117688	0.315094	0.457	0.412	0.547666
Kat6a	0.117715	0.31796	0.543	0.445	0.547666
Oser1	0.117752	0.262201	0.717	0.555	0.547666
Hs6st2	0.117843	0.362695	0.413	0.143	0.547683
Ccar2	0.117957	0.250778	0.391	0.252	0.547683
Cdk12	0.117966	0.36458	0.783	0.748	0.547683
Ttc19	0.118043	0.284734	0.652	0.538	0.547717
Mzt1	0.118417	0.313954	0.609	0.454	0.548684
Cabin1	0.118448	0.308628	0.652	0.462	0.548684
Tspan9	0.118462	0.288297	0.413	0.269	0.548684
Psmd4	0.118699	0.14789	0.891	0.95	0.549459
Shroom3	0.118985	0.328794	0.435	0.235	0.550132
Lamc2	0.119049	0.372404	0.326	0.202	0.550132
Pycrl	0.119056	0.320348	0.761	0.571	0.550132
Hmg20b	0.119509	0.372794	0.826	0.782	0.551728
Amd1	0.119551	0.267917	0.522	0.37	0.551728
Gabpb1	0.119618	0.257335	0.391	0.311	0.551728
Eif3f	0.11971	0.187006	0.957	0.983	0.551728
Ahnak	0.119754	0.606213	0.435	0.277	0.551728
Fn1	0.119984	0.873662	0.609	0.336	0.552461
Zc3h18	0.120252	0.321873	0.674	0.613	0.553215
Gm20342	0.120289	0.293267	0.391	0.286	0.553215
Bptf	0.120849	0.435436	0.891	0.891	0.555467
Rps6ka3	0.121024	0.660778	0.717	0.655	0.555942
Pdzk1ip1	0.121221	0.854022	0.457	0.412	0.556521
Ddx42	0.121348	0.349905	0.739	0.739	0.55671
Smc5	0.121442	0.277538	0.652	0.454	0.55671
Fam126b	0.121526	0.288297	0.413	0.277	0.55671
Cep290	0.121562	0.423783	0.63	0.529	0.55671
Naxd	0.121618	0.362695	0.804	0.756	0.55671
Ubxn8	0.1217	0.270407	0.457	0.235	0.556762
Rpl13a	0.121942	0.134888	0.935	0.983	0.557539
Crtap	0.12212	0.387271	0.609	0.42	0.557584
Uso1	0.122124	0.305344	0.522	0.37	0.557584
Ash2l	0.122165	0.365969	0.761	0.689	0.557584
Morc3	0.122246	0.279558	0.522	0.37	0.557627
Rev1	0.122333	0.257335	0.5	0.277	0.557698
Sesn1	0.122809	0.242946	0.435	0.151	0.55953
Pgrmc2	0.122878	0.333968	0.674	0.538	0.55953
Cbfb	0.122998	0.244756	0.478	0.261	0.559754
Spc25	0.123299	0.674942	0.522	0.252	0.560794
Elob	0.123475	0.47331	0.978	0.975	0.561271
Qprt	0.123596	0.361648	0.413	0.269	0.561273
Tmem147	0.123619	0.380497	0.913	0.798	0.561273
Dbn1	0.123723	0.362046	0.717	0.723	0.561286
Ctsd	0.123766	0.407429	0.87	0.824	0.561286
Mid1ip1	0.123916	0.4164	0.478	0.252	0.561645
Ptp4a2	0.124015	0.419122	0.913	0.832	0.561766
Trp53i11	0.124184	0.296556	0.391	0.193	0.562179
Zfp445	0.12425	0.394194	0.587	0.513	0.562179
Ppp6r1	0.124702	0.270238	0.391	0.269	0.563896
Tnpo3	0.124826	0.362695	0.696	0.664	0.564101
Lef1	0.124891	0.317554	0.348	0.151	0.564101
Kank1	0.125074	0.331443	0.543	0.487	0.564601
B4galt3	0.125185	0.257335	0.5	0.277	0.564778
Snf8	0.125713	0.375118	0.848	0.824	0.566615
Bet1	0.125737	0.302185	0.674	0.597	0.566615
Rexo4	0.126191	0.287188	0.565	0.445	0.567863
Rab3ip	0.126215	0.126063	0.913	0.933	0.567863
Mvb12a	0.126293	0.33856	0.783	0.605	0.567863
Sfxn1	0.126305	0.135563	0.848	0.882	0.567863
2610318N02Rik	0.126684	0.324474	0.326	0.193	0.568601
Bclaf3	0.126686	0.250778	0.457	0.244	0.568601
Smg5	0.126687	0.264024	0.435	0.21	0.568601
Sptan1	0.126846	0.54666	0.696	0.664	0.568988
Adgrg1	0.126948	0.458888	0.348	0.261	0.569121
Gprasp1	0.127138	0.348685	0.63	0.529	0.569647
Tbk1	0.127395	0.251104	0.5	0.277	0.570259
Zfp612	0.127421	0.280592	0.435	0.328	0.570259
Uaca	0.127627	0.327651	0.37	0.202	0.570856
Trpv4	0.127858	0.425472	0.239	0.168	0.57096
Igbp1	0.127896	0.103184	0.739	0.832	0.57096
Hes6	0.128029	0.30591	0.652	0.504	0.57096
Ccdc173	0.128032	-0.102321	0.348	0.37	0.57096
Snx2	0.128057	0.362006	0.761	0.739	0.57096
Prtn3	0.128202	0.243729	0.478	0.202	0.57096
Cnep1r1	0.128211	0.268764	0.543	0.353	0.57096
Creb1	0.128264	0.346947	0.478	0.378	0.57096
Ctcf	0.128307	0.449707	0.826	0.824	0.57096
Dgcr8	0.128526	0.301506	0.391	0.244	0.571609
Rhno1	0.128709	0.273956	0.5	0.403	0.572098
Mcrip1	0.128797	0.366113	0.891	0.857	0.57215
Prkaca	0.12894	0.316175	0.587	0.462	0.57215
5730559C18Rik	0.12898	0.294149	0.457	0.227	0.57215
Eif4a3	0.129013	0.347081	0.87	0.882	0.57215
Cdh11	0.129126	0.497671	0.326	0.176	0.572324
Sncaip	0.129339	0.457395	0.348	0.176	0.572945
Emp1	0.129496	0.394536	0.304	0.126	0.573315
Fam222a	0.129642	0.342076	0.326	0.168	0.5734
Capns1	0.129723	0.136482	0.87	0.882	0.5734
Rpgrip1	0.129735	-0.107069	0.196	0.328	0.5734
Bmp1	0.13037	0.318704	0.413	0.235	0.575882
Ipo5	0.130562	0.322813	0.739	0.639	0.576403
Gas2	0.130675	0.278567	0.522	0.395	0.576519
1500011B03Rik	0.130788	0.27058	0.435	0.218	0.576519
Il6st	0.130809	0.376394	0.413	0.311	0.576519
Rangrf	0.131006	0.322521	0.435	0.454	0.57705
Cuedc2	0.131077	0.349002	0.913	0.874	0.57705
Zfp354c	0.131227	0.297609	0.391	0.193	0.577382
Cfap97	0.131346	0.34811	0.522	0.487	0.577583
Eif5b	0.131992	0.215043	0.891	0.975	0.579237
Htt	0.132019	0.324776	0.435	0.353	0.579237
Thap2	0.132099	0.300715	0.5	0.479	0.579237
Cdk16	0.132138	0.320616	0.5	0.487	0.579237
Socs6	0.132172	0.262969	0.543	0.361	0.579237
Tiprl	0.132326	0.329656	0.674	0.605	0.579237
Aadat	0.132346	-0.255376	0.13	0.185	0.579237
Kdm4a	0.132352	0.313847	0.435	0.353	0.579237
Fndc5	0.132418	-0.18092	0.217	0.252	0.579237
Asrgl1	0.132462	0.257335	0.587	0.361	0.579237
Lage3	0.132762	0.358033	0.826	0.815	0.580193
Ythdc1	0.13283	0.369223	0.848	0.84	0.580193
Rcl1	0.133006	0.2514	0.522	0.311	0.58045
Braf	0.1331	0.285827	0.5	0.345	0.58045
Mrpl16	0.133114	0.308628	0.522	0.487	0.58045
Cdc37l1	0.133185	0.325738	0.63	0.521	0.58045
Tle4	0.133853	0.335536	0.587	0.454	0.583037
Serping1	0.134657	0.333321	0.37	0.16	0.586084
Srprb	0.134712	0.268264	0.543	0.395	0.586084
Trmt112	0.134778	0.127369	0.957	0.966	0.586084
Rab10os	0.134913	0.282028	0.391	0.294	0.586349
Pls1	0.135113	-0.214822	0.217	0.286	0.586888
Sltm	0.135421	0.379638	0.935	0.916	0.587903
Rps26	0.135621	0.181698	1	1	0.588233
Tbc1d7	0.135648	0.290487	0.522	0.328	0.588233
Eps8	0.135813	0.341418	0.522	0.496	0.588624
Abl1	0.135934	0.283722	0.543	0.395	0.58882
Trak2	0.136149	0.312143	0.304	0.168	0.589428
Asph	0.136252	0.245906	0.522	0.37	0.589545
Supt4a	0.136472	0.379624	0.891	0.891	0.590171
Zfp523	0.136606	0.268764	0.522	0.361	0.590423
Dnaja2	0.136768	0.373869	0.935	0.933	0.590544
Ankrd17	0.136874	0.433136	0.783	0.756	0.590544
Aacs	0.1369	0.301787	0.37	0.109	0.590544
Pdap1	0.136936	0.360519	0.978	0.975	0.590544
Lrp1	0.137094	0.326696	0.435	0.387	0.590766
Arhgap21	0.137138	0.320249	0.413	0.235	0.590766
Iqcb1	0.137284	0.269311	0.435	0.277	0.590834
Nosip	0.137305	0.263033	0.5	0.37	0.590834
Rfesd	0.13739	0.263305	0.435	0.311	0.590874
Trio	0.137546	0.383629	0.565	0.487	0.591002
Clns1a	0.137675	0.359776	0.804	0.798	0.591002
Amotl1	0.137694	0.288107	0.565	0.387	0.591002
Ankrd16	0.137739	0.257335	0.413	0.21	0.591002
Hoxc9	0.137797	0.417267	0.783	0.597	0.591002
Ints1	0.137894	0.307345	0.37	0.261	0.591045
Ift27	0.137958	0.299182	0.717	0.546	0.591045
Map1s	0.138058	0.273956	0.565	0.361	0.591147
Rock1	0.138237	0.46787	0.87	0.849	0.591574
Tmem33	0.138317	0.289338	0.739	0.605	0.591574
Smim24	0.138384	0.455312	0.283	0.252	0.591574
Sort1	0.138593	0.308628	0.37	0.21	0.592141
Gm26518	0.138928	0.251855	0.587	0.412	0.592853
Rwdd1	0.139065	0.39233	0.848	0.882	0.592853
Crybg3	0.139255	0.338885	0.37	0.218	0.592853
1700037H04Rik	0.139427	0.257335	0.478	0.311	0.592853
Zfp512	0.139485	0.279314	0.543	0.378	0.592853
Ndufs7	0.139544	0.412899	0.935	0.941	0.592853
Capn7	0.139607	0.257335	0.435	0.319	0.592853
Pgpep1	0.139611	0.307689	0.609	0.504	0.592853
Dip2b	0.139748	0.318296	0.413	0.319	0.592853
Acadm	0.1398	0.100243	0.696	0.815	0.592853
Myg1	0.139826	0.310988	0.739	0.664	0.592853
Mrpl17	0.139993	0.145522	0.848	0.899	0.592853
Eaf2	0.14007	0.236133	0.348	0.168	0.592853
Blmh	0.140076	0.144072	0.891	0.933	0.592853
Clip3	0.140156	0.433226	0.391	0.193	0.592853
Trir	0.140251	0.398498	0.935	0.966	0.592853
Usp48	0.140289	0.306783	0.565	0.563	0.592853
Cers4	0.140342	0.285827	0.413	0.336	0.592853
Mrpl54	0.140397	0.199397	0.826	0.899	0.592853
Znrf3	0.140507	0.232017	0.457	0.244	0.592853
Nol4l	0.140508	0.29872	0.348	0.16	0.592853
Mrpl20	0.140512	0.389854	0.87	0.874	0.592853
Pphln1	0.140527	0.284734	0.37	0.193	0.592853
Prps1	0.140606	0.257335	0.478	0.202	0.592853
Dnajb9	0.140676	0.289084	0.478	0.353	0.592853
Atp7a	0.14073	0.270238	0.391	0.235	0.592853
Rgs2	0.140946	0.413681	0.283	0.084	0.592918
Gm37494	0.140971	0.269914	0.37	0.269	0.592918
Luc7l3	0.140988	0.446925	0.935	0.924	0.592918
Fstl1	0.141048	0.450935	0.913	0.782	0.592918
Zfp326	0.141228	0.315984	0.87	0.664	0.593289
Rnf26	0.141356	0.276753	0.413	0.227	0.593289
Ubap2l	0.141364	0.378989	0.957	0.866	0.593289
Cox7a2l	0.141579	0.376892	0.957	0.966	0.593873
Cdc42ep2	0.141848	0.352043	0.283	0.193	0.59434
Zfp945	0.142013	0.300352	0.5	0.403	0.59434
Tcerg1	0.142137	0.46879	0.674	0.723	0.59434
Atp6v1h	0.142204	0.293703	0.478	0.437	0.59434
Pdpk1	0.142206	0.306391	0.5	0.37	0.59434
Gm45051	0.142258	0.250414	0.413	0.176	0.59434
Rev3l	0.142373	0.313024	0.674	0.538	0.59434
Txn1	0.142401	0.349861	0.978	0.992	0.59434
Bbof1	0.142527	-0.14813	0.109	0.303	0.59434
Atrx	0.142538	0.476947	0.957	0.95	0.59434
Psme1	0.142559	0.384087	0.848	0.924	0.59434
Tenm3	0.142666	0.352645	0.37	0.126	0.59434
Ipmk	0.142803	-0.109769	0.239	0.311	0.59434
Atpaf1	0.142872	0.277138	0.543	0.487	0.59434
Lrwd1	0.142974	0.278612	0.565	0.403	0.59434
Ssu72	0.143025	0.383968	0.891	0.84	0.59434
Klf4	0.143119	-0.129172	0.283	0.311	0.59434
Med13l	0.143124	0.301298	0.457	0.361	0.59434
Cstf2t	0.143134	0.288297	0.391	0.277	0.59434
Ccar1	0.143794	0.374282	0.957	0.882	0.596765
2022-09-09	0.144009	0.243912	0.391	0.193	0.597088
Txlna	0.144025	0.317715	0.717	0.529	0.597088
Bax	0.144214	0.404688	0.891	0.891	0.597187
Anapc2	0.14439	0.330172	0.609	0.529	0.597187
Arfgef3	0.144398	0.285908	0.391	0.151	0.597187
Rangap1	0.14448	0.298157	0.543	0.37	0.597187
Usp32	0.144497	0.250601	0.413	0.244	0.597187
Cys1	0.144561	0.118498	0.63	0.748	0.597187
Med10	0.144583	0.316175	0.652	0.681	0.597187
Ap1s1	0.144966	0.394613	0.826	0.731	0.598455
Aimp1	0.145229	0.361358	0.935	0.958	0.598458
Cactin	0.145257	0.231018	0.413	0.227	0.598458
Idh3a	0.145258	0.330923	0.717	0.672	0.598458
Arpc3	0.145294	0.122678	0.978	0.966	0.598458
Bdp1	0.145377	0.339348	0.63	0.546	0.598458
Hdac1	0.145426	0.350363	0.826	0.815	0.598458
Svil	0.145783	0.365431	0.565	0.437	0.599097
Chaf1b	0.145929	0.22868	0.478	0.286	0.599097
Smg6	0.145989	0.38976	0.587	0.546	0.599097
Nfat5	0.146	0.157108	0.565	0.731	0.599097
Rpl36al	0.146008	0.357218	0.913	0.874	0.599097
Nelfa	0.146041	0.268508	0.543	0.37	0.599097
Eif2ak1	0.14628	0.233804	0.587	0.37	0.599761
Cav1	0.146408	0.564562	0.478	0.403	0.599976
Ctsb	0.146509	0.375442	0.848	0.765	0.600072
Upf1	0.146784	0.27514	0.478	0.286	0.600887
Epm2aip1	0.146895	0.325654	0.522	0.471	0.601024
Atg101	0.147115	0.303005	0.587	0.538	0.601353
Herc1	0.147129	0.355191	0.63	0.529	0.601353
Ctr9	0.147249	0.327952	0.674	0.605	0.601531
Dach1	0.147562	0.393847	0.761	0.731	0.602492
Bloc1s1	0.147811	0.263235	0.478	0.319	0.60302
Sars	0.147866	0.114093	0.891	0.908	0.60302
Atxn7l3b	0.147922	0.496546	0.935	0.975	0.60302
Capza2	0.148143	0.363574	0.891	0.857	0.603605
Acaa1a	0.148248	0.398414	0.804	0.798	0.603718
Abcd4	0.148389	0.296556	0.5	0.353	0.603981
Acly	0.148602	0.292842	0.674	0.555	0.604233
Tcof1	0.148674	0.345746	0.609	0.588	0.604233
Vps29	0.148754	0.10517	0.891	0.941	0.604233
Aprt	0.148761	0.223366	0.891	0.95	0.604233
Tmem201	0.149034	0.277813	0.37	0.218	0.605032
1700006J14Rik	0.149395	0.2514	0.478	0.269	0.605822
Psmc3ip	0.14944	0.251181	0.413	0.328	0.605822
Hccs	0.149478	0.277008	0.391	0.235	0.605822
Tmem115	0.149539	0.262612	0.609	0.42	0.605822
Arglu1	0.149802	0.389782	0.935	0.941	0.606416
Arhgef7	0.149876	0.27514	0.435	0.303	0.606416
Pax8	0.149978	0.50939	0.848	0.849	0.606416
Ctsz	0.149996	0.356317	0.761	0.697	0.606416
Dmd	0.150497	0.328209	0.413	0.328	0.606753
Bet1l	0.150526	0.263305	0.457	0.336	0.606753
Serpinb6a	0.150645	0.118674	0.652	0.739	0.606753
Yipf5	0.150762	0.350345	0.696	0.689	0.606753
Dnph1	0.150806	0.238287	0.478	0.277	0.606753
Rnaseh2a	0.150886	0.290279	0.587	0.479	0.606753
Scoc	0.150896	0.35682	0.652	0.605	0.606753
Itpr2	0.150924	0.354499	0.348	0.185	0.606753
Ints5.1	0.15094	0.263766	0.413	0.261	0.606753
Hspa12a	0.150952	0.60028	0.304	0.084	0.606753
Tst	0.151003	0.476964	0.63	0.588	0.606753
Pea15a	0.15101	0.470355	0.326	0.109	0.606753
Adgrl1	0.1521	0.314493	0.522	0.429	0.61082
Midn	0.152751	0.462875	0.63	0.689	0.613119
Sh2d4a	0.153286	0.624648	0.348	0.261	0.613995
Fbxw5	0.153302	0.251669	0.543	0.353	0.613995
Ppp1r12a	0.153311	0.485119	0.848	0.748	0.613995
Loxl2	0.153334	0.525016	0.413	0.252	0.613995
Ganab	0.153362	0.322434	0.565	0.555	0.613995
Krt7	0.153548	0.522375	0.239	0.151	0.614428
Thap11	0.153712	0.286894	0.543	0.496	0.614767
Clmp	0.154359	0.463339	0.304	0.151	0.61704
Lig3	0.154541	0.262906	0.5	0.37	0.617228
Soat1	0.154563	0.315229	0.348	0.227	0.617228
Lect2	0.154776	0.398834	0.348	0.042	0.617761
Mier3	0.154967	0.250778	0.413	0.235	0.618209
Chd7	0.155647	0.335726	0.652	0.571	0.62034
Krcc1	0.15566	0.453827	0.717	0.697	0.62034
Commd3	0.155773	0.107395	0.848	0.899	0.620473
Aig1	0.15601	0.351893	0.652	0.546	0.621088
Ddhd2	0.156162	0.269456	0.457	0.294	0.621088
Gopc	0.156165	0.257335	0.391	0.328	0.621088
Dym	0.156477	0.250601	0.435	0.218	0.621347
Fnbp1	0.156501	0.263684	0.413	0.261	0.621347
Etfdh	0.156612	0.285506	0.478	0.361	0.621347
Nradd	0.156689	0.313126	0.696	0.613	0.621347
Cdt1	0.156718	0.264115	0.37	0.193	0.621347
Arhgap1	0.156849	0.366138	0.37	0.336	0.621347
Hibch	0.156999	0.2455	0.478	0.353	0.621347
Ilk	0.15704	0.233237	0.826	0.79	0.621347
Dstn	0.157057	0.173213	0.978	0.975	0.621347
Pcyt1a	0.157082	0.318704	0.37	0.252	0.621347
Vamp7	0.157104	0.251973	0.565	0.403	0.621347
Csad	0.157192	0.328161	0.609	0.462	0.62138
Usp24	0.157385	0.280592	0.413	0.336	0.62183
Nsg1	0.157894	0.337965	0.304	0.092	0.623296
Nbeal1	0.157986	0.359384	0.696	0.588	0.623296
Erp44	0.158058	0.307887	0.761	0.647	0.623296
Prkd3	0.158075	0.272298	0.609	0.445	0.623296
Prc1	0.158262	0.632947	0.196	0.118	0.62372
Slc4a2	0.158465	0.332298	0.37	0.277	0.624204
Bcl7b	0.15873	0.271724	0.674	0.496	0.624933
Wasf2	0.159275	0.450352	0.696	0.714	0.626539
Ubr5	0.159298	0.366769	0.696	0.689	0.626539
Pter	0.159598	0.277538	0.413	0.454	0.627403
Ptges3	0.159692	0.365448	0.87	0.891	0.627458
Sf1	0.159787	0.314493	0.804	0.681	0.627517
Alkbh6	0.159901	0.282653	0.565	0.454	0.627648
Tfdp2	0.160112	0.103184	0.674	0.748	0.628081
Sel1l3	0.160171	0.293703	0.348	0.101	0.628081
Nrde2	0.160269	-0.118454	0.217	0.286	0.628148
Jmy	0.160561	0.286894	0.522	0.496	0.628976
Atn1	0.160755	0.316973	0.478	0.378	0.629299
Lyar	0.16088	0.350484	0.891	0.798	0.629299
[truncated: 5,850 more rows]

## Sheet: N.tubule4_DHL.MutVsCTRL.DEGs
Gene	p_val	avg_logFC	pct.1	pct.2	p_val_adj
Serpinh1	2.06244e-12	1.81289	1	0.931	2.05213e-08
Tmem176a	2.98296e-11	-0.825685	0.938	0.98	1.48402e-07
Rps18	1.66884e-09	0.629078	1	1	5.53499e-06
Rps2	3.66138e-09	1.58424	1	1	7.66855e-06
Glud1	3.85354e-09	-0.198682	1	0.99	7.66855e-06
Rflnb	4.76967e-09	1.42339	0.938	0.167	7.90971e-06
Dek	8.06949e-09	1.64773	0.875	0.804	1.07648e-05
Ivns1abp	8.65514e-09	-0.100961	0.875	0.961	1.07648e-05
Uba52	8.52748e-08	1.48207	1	0.98	9.4276e-05
Nasp	2.29998e-07	1.39118	0.938	0.725	0.000228848
Mgst1	2.59973e-07	-0.288466	0.688	0.863	0.000235158
Prss12	2.8832e-07	-0.549141	0.375	0.676	0.000239065
Ranbp1	3.76344e-07	1.45734	0.938	0.843	0.00027867
Acat1	3.92098e-07	-0.215967	0.562	0.765	0.00027867
Rpl36	5.16247e-07	1.33166	1	1	0.000337194
Bag2	5.42221e-07	-0.101218	0.812	0.902	0.000337194
Oaz1	9.37871e-07	1.26119	1	1	0.00054893
Rpl37	1.14518e-06	1.41617	1	1	0.000633031
Ptn	1.22528e-06	2.2064	0.812	0.49	0.000641658
Mpc2	1.43941e-06	0.336388	1	1	0.000716106
H2afz	1.55706e-06	1.97337	1	0.99	0.000737751
Cpb2	2.18696e-06	-0.507612	0.562	0.725	0.000989103
Ucp2	2.36062e-06	1.48714	0.875	0.176	0.00102122
Bcam	3.08554e-06	1.49769	1	0.804	0.00127921
Ifitm2	4.01939e-06	1.61774	1	0.647	0.00159972
Stmn1	4.83462e-06	1.59614	1	0.902	0.00179958
Rpl41	4.88329e-06	1.46822	1	1	0.00179958
Hist1h2ap	5.65709e-06	2.43683	0.75	0.52	0.00201029
Hnf1aos1	6.38913e-06	-0.484392	0.25	0.598	0.00219213
Rpl29	6.68581e-06	0.732795	1	1	0.00221746
Rab18	7.48106e-06	-0.119379	1	0.882	0.00238127
Rps14	7.65836e-06	0.773717	1	1	0.00238127
Mme	8.42193e-06	-0.220788	0.875	0.941	0.00253934
Cpn1	1.36498e-05	-0.360276	0.562	0.765	0.00399458
Nenf	1.67159e-05	0.366101	0.812	0.961	0.00475209
Rpl38	1.8369e-05	1.22338	1	1	0.005077
Gabarap	2.00792e-05	0.474614	1	1	0.00539969
H3f3b	2.09684e-05	1.31948	1	1	0.0054904
Ptma	2.23059e-05	1.40932	1	1	0.00569087
Smarca4	2.36481e-05	1.35797	0.812	0.225	0.00588246
Hspa2	2.50328e-05	-0.496919	0.375	0.52	0.00598866
Timm8b	2.53084e-05	0.413643	0.875	0.98	0.00598866
Pabpc1	2.62184e-05	1.41989	1	0.961	0.00598866
Wdr83os	2.64825e-05	1.24171	0.938	0.627	0.00598866
Sim2	2.97548e-05	2.16005	0.812	0.225	0.00654829
Rplp0	3.08358e-05	0.845413	1	1	0.00654829
Tlcd1	3.09316e-05	-0.143827	0.562	0.657	0.00654829
Gm10076	3.90706e-05	1.50916	1	0.814	0.00783762
Gm16136	3.92984e-05	-0.392019	0.375	0.52	0.00783762
Fkbp4	4.01108e-05	1.22729	1	0.912	0.00783762
Calm1	4.01727e-05	1.21132	1	0.971	0.00783762
Hsp90b1	4.10054e-05	1.38918	1	0.961	0.00784624
Spsb2	4.23979e-05	-0.260157	0.375	0.569	0.0079596
Prom1	4.63204e-05	1.39057	0.812	0.314	0.00840199
Tmem176b	4.64432e-05	-0.494629	1	1	0.00840199
Mrps6	5.565e-05	1.23643	1	0.735	0.00988782
Fam107b	6.32839e-05	-0.484103	0.5	0.559	0.0110469
H2afy	6.8815e-05	1.25648	1	0.951	0.0118053
Atp1b1	7.64969e-05	1.24215	1	0.961	0.0129007
Snrpg	8.70376e-05	1.40701	0.938	0.902	0.0144337
Mxi1	0.000100936	0.106534	0.688	0.853	0.0164641
Odc1	0.000118441	1.34015	0.938	0.588	0.0190079
Acaa2	0.000127278	-0.159339	0.625	0.824	0.0198417
Phyhipl	0.000127625	-0.234605	0.5	0.618	0.0198417
Dync2li1	0.000134869	0.112158	0.938	0.863	0.0204887
Hexb	0.000135905	-0.455741	0.125	0.402	0.0204887
Emid1	0.000144169	1.49735	0.875	0.324	0.0214101
Trappc6b	0.000154709	0.204967	0.938	0.863	0.0226375
Vldlr	0.000171445	1.20869	0.875	0.529	0.0247229
Tspan12	0.000203152	0.943014	0.75	0.275	0.0288766
Hmgb2	0.000218785	2.01683	0.875	0.716	0.0306607
Rpl8	0.000225677	1.17907	1	1	0.0310642
Bnip3	0.000227908	-0.113264	0.625	0.667	0.0310642
Rpl21	0.000242496	0.857051	1	1	0.0326059
S100a13	0.00025272	-0.357111	0.125	0.412	0.0335275
Wfdc15b	0.000283487	-0.548873	0.375	0.49	0.0371144
Psmd3	0.000296749	0.381324	0.875	0.961	0.0383461
Gm13855	0.000312879	-0.310939	0.188	0.402	0.0399122
Aldoa	0.000324077	0.139891	1	1	0.0408173
H1fx	0.000334397	1.7711	0.75	0.608	0.0415907
Rrbp1	0.000340307	1.24011	1	0.941	0.0418032
Sra1	0.000362827	0.224653	0.812	0.833	0.0440259
Chd4	0.000369065	1.30339	0.938	0.873	0.0442434
Atp2b1	0.000381747	1.19467	1	0.725	0.0452189
Mrpl33	0.000408991	0.24065	0.875	0.902	0.0476826
Ptov1	0.000412131	1.18326	1	1	0.0476826
Pebp1	0.000439783	1.22799	1	1	0.0496061
Xist	0.000442788	-1.20244	0.312	0.755	0.0496061
Mest	0.000443713	2.09385	0.812	0.314	0.0496061
Akr7a5	0.000454606	1.17275	1	0.794	0.0502592
Rbm3	0.000476952	1.32472	1	0.931	0.0521502
Sri	0.000483362	0.332817	0.938	0.941	0.0522766
Tubb5	0.000515627	1.43589	1	0.971	0.0551665
Rbpms	0.000560301	1.25455	0.938	0.569	0.0593084
Cthrc1	0.000571537	-0.575364	0.188	0.392	0.0594849
Mif	0.000573924	0.57117	1	1	0.0594849
Tubb4b	0.000616794	1.52114	0.938	0.725	0.0632691
Ciapin1	0.000631862	1.01441	0.875	0.422	0.0641533
Tpi1	0.000661681	0.477731	1	1	0.0665023
Ap2a2	0.000697568	0.130583	0.875	0.912	0.0688171
Gnai2	0.000698546	1.26657	1	0.775	0.0688171
Nt5c3	0.000708339	-0.162519	0.562	0.51	0.0690977
Fubp1	0.000717693	1.21671	0.938	0.814	0.0693305
Rps21	0.0007344	1.31222	1	1	0.0697425
Clec18a	0.000735976	1.60643	0.75	0.157	0.0697425
mt-Cytb	0.000750926	1.47399	1	1	0.0704878
Foxp4	0.000759325	1.11971	0.75	0.216	0.0706101
Cth	0.000814308	1.10517	0.812	0.265	0.0743415
Ch25h	0.000814394	-0.571898	0.062	0.363	0.0743415
Igf2bp1	0.000843831	1.15399	0.875	0.569	0.0762142
Cyb5a	0.000850228	1.22322	1	0.892	0.0762142
Fzd4	0.000889953	0.463285	0.812	0.961	0.0790628
Lmnb1	0.000917958	1.09269	0.875	0.539	0.080829
Psme2	0.000929937	0.289466	0.812	0.804	0.0811656
Srsf2	0.000953889	1.29931	1	0.843	0.0825321
Tmem218	0.00101018	-0.20174	0.125	0.402	0.0848838
Rgs6	0.00101024	-0.333076	0.188	0.382	0.0848838
Atp6v1g1	0.00101444	0.452365	1	0.99	0.0848838
Dag1	0.00101519	1.18521	0.875	0.902	0.0848838
Snhg18	0.00102817	0.331559	0.875	0.922	0.0852521
Tsix	0.00103893	-0.327141	0.188	0.402	0.0854326
Cast	0.00105132	-0.110524	0.438	0.5	0.0857431
Kank1	0.00106743	0.119121	0.625	0.686	0.0863491
Rpn1	0.00108958	1.15518	0.875	0.657	0.0872934
Vapa	0.00109665	0.29153	0.938	0.951	0.0872934
Lmo4	0.00110713	0.274362	0.875	0.892	0.0874283
Plau	0.00113626	-0.112312	0.875	0.902	0.089022
Fn1	0.00116277	1.47834	0.75	0.186	0.0903874
Lig1	0.00123533	1.18555	0.75	0.373	0.0952834
Palm	0.00127621	0.207622	0.875	0.902	0.0962492
Nsmce2	0.00127686	1.08017	0.812	0.451	0.0962492
Ndufa5	0.00127687	1.16956	1	0.824	0.0962492
Hist3h2ba	0.00130894	1.28675	0.75	0.157	0.0979242
Ccser1	0.0013428	-0.195309	0.375	0.49	0.0997078
Sin3b	0.00136322	0.369494	0.938	0.951	0.100475
Fundc2	0.0013841	0.396356	0.938	0.863	0.100698
Adamts9	0.0013865	1.10367	0.75	0.304	0.100698
Txndc17	0.00141084	0.39074	0.938	0.941	0.101717
Cryz	0.00142161	0.142598	0.812	0.853	0.101717
Bcl11a	0.0014378	-0.539813	0	0.304	0.101717
Rack1	0.00144142	0.741948	1	1	0.101717
Cisd1	0.00146821	0.412845	0.938	0.961	0.102878
Bad	0.00148896	0.109415	0.562	0.716	0.103371
Adk	0.00149749	0.175571	0.938	0.794	0.103371
Trappc6a	0.00150642	0.378384	1	0.853	0.103371
Spg20	0.00153696	-0.238892	0.25	0.412	0.104745
St13	0.00156263	0.513492	1	0.99	0.105656
Il17re	0.00157157	-0.474894	0	0.314	0.105656
Thbs1	0.00160414	-0.183138	0.625	0.569	0.107122
Ankrd11	0.00170759	1.18521	1	0.892	0.11327
Malat1	0.0017766	-0.185784	1	1	0.117068
Abhd14a	0.00188571	0.141314	0.5	0.676	0.123439
Reep5	0.00192906	1.33921	0.938	0.824	0.125169
Hpn	0.00193851	1.10659	0.875	0.314	0.125169
Dnajc3	0.00194988	1.03313	0.938	0.627	0.125169
Gnb1	0.00196261	1.06336	1	0.814	0.125179
Etfb	0.00201741	0.376478	0.938	0.931	0.127369
Selenoh	0.00202254	1.34624	1	0.814	0.127369
Wdfy1	0.00204606	1.03355	0.75	0.196	0.12804
Fau	0.00208758	0.971349	1	1	0.129066
Ezh2	0.00208841	1.11878	0.875	0.637	0.129066
Fam81a	0.00210433	-0.215629	0.25	0.382	0.129248
Nsd2	0.00213834	1.01706	0.812	0.431	0.130047
Atraid	0.00214348	0.37857	1	0.892	0.130047
Blmh	0.00219444	0.33279	0.938	0.931	0.132147
B4gat1	0.00220467	0.113268	0.562	0.627	0.132147
Stxbp6	0.00226307	0.938628	0.812	0.471	0.134836
Psma7	0.00228418	1.15924	1	0.98	0.135231
Eif3j1	0.00230253	1.04801	0.938	0.51	0.135231
Zfp503	0.00231049	-0.235641	0.5	0.539	0.135231
Map4k4	0.00237031	0.968429	0.875	0.569	0.137804
Lsm5	0.00238213	1.03861	0.875	0.441	0.137804
Mien1	0.00242143	0.303571	0.875	0.843	0.139267
Iah1	0.00243754	1.45146	0.938	0.853	0.139327
Cdk5rap1	0.00245417	-0.111226	0.375	0.441	0.139327
Rhob	0.00247858	-0.308061	0.625	0.686	0.139327
mt-Nd4	0.00248615	1.3804	1	1	0.139327
Ninj1	0.00249249	0.96363	0.812	0.539	0.139327
Psmd1	0.00251505	1.12019	0.938	0.588	0.139686
Bok	0.00252698	0.844426	0.625	0.245	0.139686
Ireb2	0.00254358	0.939377	0.812	0.373	0.139827
Tmed3	0.00257485	0.230524	0.562	0.706	0.140768
Mrpl21	0.00258913	1.08793	0.938	0.706	0.140775
Pten	0.00262058	0.254332	0.562	0.775	0.141295
Dhx36	0.00262884	0.315657	1	0.814	0.141295
Slc25a5	0.00266269	1.28715	1	0.882	0.141295
Gsdme	0.00267336	-0.186472	0.312	0.441	0.141295
Upk3bl	0.00267819	-0.493686	0.125	0.333	0.141295
Ccnd1	0.00268389	2.25453	0.75	0.49	0.141295
Bmp4	0.00271162	0.240052	0.688	0.745	0.142003
Rpl39	0.00274453	1.26482	1	1	0.142974
Fstl3	0.00279335	-0.20174	0.375	0.441	0.144232
Sim1	0.00279767	0.927908	0.875	0.451	0.144232
Hcfc1r1	0.00287878	0.369494	0.938	0.922	0.147649
Epha4	0.00294978	1.93243	0.938	0.382	0.150514
Chd2	0.00296714	0.220617	0.75	0.784	0.150628
Gm10260	0.00298294	2.75347	0.625	0.039	0.150661
Gm2a	0.00305692	-0.253033	0.188	0.353	0.153618
Mcmdc2	0.00319786	-0.126316	0.438	0.529	0.159893
Sfpq	0.00322444	1.16139	1	0.863	0.160392
Dut	0.00326382	1.31976	0.75	0.471	0.160392
Samm50	0.0032701	0.320547	0.75	0.824	0.160392
Mrpl17	0.00328577	0.359018	0.688	0.833	0.160392
Snrpf	0.00328844	1.30201	1	0.863	0.160392
Rcn3	0.0033881	0.996333	0.875	0.324	0.164447
Psip1	0.00344456	1.12715	1	0.794	0.166375
Tvp23b	0.0034727	0.195128	0.75	0.745	0.166924
Prpsap1	0.00349408	0.996413	0.812	0.549	0.167144
Gprasp1	0.00352121	0.943528	0.938	0.51	0.167484
Cycs	0.00353483	1.16775	0.875	0.608	0.167484
Fgfr1	0.00358135	1.2451	0.5	0.333	0.168883
Pax2	0.00371395	1.23334	0.875	0.765	0.172014
Tm2d3	0.00372028	0.196063	0.812	0.755	0.172014
Mcm7	0.00373646	1.11217	0.625	0.412	0.172014
Dnajc9	0.0037393	1.02847	0.688	0.382	0.172014
Ndufa8	0.00375085	0.42459	0.875	0.941	0.172014
Hes6	0.00375147	0.919286	0.875	0.333	0.172014
Tmem169	0.00380016	-0.186472	0.375	0.402	0.173384
Krt7	0.00381619	1.13257	0.562	0.216	0.173384
Cript	0.00385733	0.246657	0.688	0.804	0.174456
Plp2	0.00388873	0.194937	0.75	0.843	0.175081
Cenpx	0.00392633	1.14257	0.875	0.667	0.1752
Samd9l	0.00392658	-0.175764	0.438	0.5	0.1752
Nbl1	0.00398163	-0.498991	0.125	0.314	0.176863
Misp	0.00401617	-0.213071	0.5	0.5	0.177604
Yif1a	0.00408277	0.181071	0.75	0.804	0.17975
Pou3f3	0.00413341	0.483875	0.875	0.941	0.180576
Chchd7	0.00414091	1.01846	0.938	0.588	0.180576
Cep164	0.00415597	0.978058	0.688	0.49	0.180576
Camk1	0.00419318	0.242946	0.688	0.716	0.181282
Wdr6	0.00421317	1.01132	0.812	0.402	0.181282
Mettl1	0.00422688	0.973135	0.75	0.412	0.181282
Kcnq1ot1	0.00429478	1.2441	0.938	0.863	0.183153
H2afv	0.00430732	1.45624	1	0.98	0.183153
Tacstd2	0.00455486	0.976915	0.438	0.245	0.192727
Cope	0.00458706	0.424056	0.875	0.951	0.192727
Itpr1	0.00459057	0.846862	0.75	0.167	0.192727
Bola3	0.00464246	0.958566	0.75	0.382	0.193957
Brd3	0.00465887	1.11704	0.875	0.657	0.193957
Trim2	0.00474988	0.983346	0.812	0.51	0.196922
Cux1	0.00486607	0.262555	0.938	0.853	0.200902
Snrpb	0.00493095	1.1653	0.938	0.912	0.202739
Herpud1	0.00501451	-0.123679	0.375	0.461	0.204332
Pgk1	0.00502055	0.304276	0.875	0.961	0.204332
Ldha	0.00504304	0.425482	1	1	0.204332
Rps25	0.00505181	0.830262	1	1	0.204332
Lsm2	0.00521129	1.03093	1	0.539	0.208787
Tmsb10	0.00523339	1.29792	1	1	0.208787
Stk32b	0.00523909	0.165197	0.5	0.686	0.208787
mt-Nd3	0.00524591	1.38881	1	0.99	0.208787
Nceh1	0.00528079	-0.142883	0.875	0.725	0.209338
Cul5	0.0053157	0.158263	0.625	0.667	0.209886
Jag1	0.00536835	0.196614	0.875	0.892	0.211127
Cox5a	0.0054631	1.20765	1	0.99	0.214007
Zfand6	0.00552367	0.317054	0.812	0.853	0.215531
Ppp1r12c	0.00560823	-0.10704	0.188	0.382	0.217976
Srp14	0.0056796	0.433675	1	0.961	0.219683
Rpap3	0.00569631	0.86562	0.938	0.402	0.219683
Map7	0.005719	0.889573	0.75	0.373	0.219707
Luzp1	0.00578096	0.980989	0.875	0.52	0.220893
Rragd	0.00580926	-0.149096	0.375	0.412	0.220893
Ccdc28b	0.00581648	0.117783	0.688	0.706	0.220893
Aplp1	0.0058953	-0.186784	0.188	0.343	0.222633
Cys1	0.00594205	0.365114	0.75	0.843	0.222633
Arid3a	0.00594237	0.915615	0.812	0.304	0.222633
Ostf1	0.0059518	0.21153	0.875	0.922	0.222633
Tubb2b	0.00602401	1.25703	1	0.559	0.22449
Srsf7	0.00610454	1.1251	0.938	0.765	0.226643
Chd7	0.00617321	0.964176	0.688	0.382	0.227961
Mfhas1	0.00618589	1.03899	1	0.51	0.227961
1500011K16Rik	0.00622495	0.891922	0.875	0.402	0.228555
Hspd1	0.00625819	1.12599	1	0.941	0.2287
Nectin3	0.00627489	0.800292	0.75	0.186	0.2287
Mex3a	0.00645277	1.13326	0.875	0.5	0.234196
Leng8	0.00647275	0.936093	0.875	0.382	0.234196
Trp53i11	0.00655048	0.901408	0.812	0.245	0.23615
Ppih	0.00673807	0.914114	0.75	0.284	0.242035
Dusp18	0.00679616	0.131721	0.312	0.539	0.243244
Nop56	0.00694535	0.954442	0.938	0.569	0.246463
Epha7	0.00695966	1.17284	0.938	0.735	0.246463
Rps11	0.00696041	1.29243	1	1	0.246463
Ak3	0.0070386	0.107145	0.625	0.598	0.24756
Phldb2	0.00704376	0.318765	1	0.971	0.24756
Stip1	0.00707703	1.00792	0.938	0.637	0.24756
Tmprss2	0.00709091	-0.173569	0.312	0.461	0.24756
Llgl2	0.00718067	0.898223	0.812	0.284	0.249817
Ston2	0.00724973	1.03267	0.625	0.265	0.251341
Bzw2	0.00730831	1.10113	1	0.686	0.252492
Arid5b	0.00745299	0.242946	0.688	0.804	0.2566
Plxnb2	0.00749246	0.957371	0.812	0.52	0.257069
Nolc1	0.00768121	0.930051	0.75	0.412	0.262639
Ppp1r14b	0.00778215	1.21769	1	0.931	0.265179
Plin3	0.00792995	0.108027	0.75	0.765	0.269294
Grb10	0.00804458	1.02248	1	0.696	0.272257
Usp8	0.00811613	0.122697	0.625	0.578	0.273747
H2afx	0.00818208	1.36632	0.688	0.559	0.2745
Blvra	0.00819361	-0.120373	0.25	0.363	0.2745
Pwwp2a	0.00837134	0.859132	0.875	0.412	0.279258
Hnrnpd	0.00839177	1.12084	1	0.98	0.279258
Vcam1	0.00849993	-0.609102	0.125	0.255	0.281914
Gm13305	0.00856868	-0.198887	0.125	0.304	0.282899
Rpl35	0.00860932	1.30656	1	1	0.282899
Tspan8	0.00861492	1.45687	0.812	0.186	0.282899
Rif1	0.00880351	1.01314	0.812	0.5	0.288141
Lactb2	0.00884238	-0.112395	0.438	0.5	0.288464
Usp7	0.00904683	0.999607	0.875	0.48	0.293986
Polr1d	0.00909097	1.10609	1	0.922	0.293986
Mcmbp	0.00912236	0.796331	0.875	0.265	0.293986
Actl6a	0.00912981	0.976915	0.938	0.618	0.293986
Adprh	0.00923686	0.165985	0.688	0.637	0.296474
Rab2a	0.00931058	0.395785	1	0.941	0.296618
Hpcal1	0.00935286	0.895652	0.812	0.392	0.296618
Ago2	0.00938439	1.02731	0.812	0.461	0.296618
Cpne3	0.00938615	0.147636	0.75	0.647	0.296618
Pclaf	0.00940424	2.19586	0.5	0.098	0.296618
Stub1	0.00942022	1.07196	1	0.804	0.296618
Irf2bpl	0.00950251	0.212056	0.625	0.627	0.298265
Tyw3	0.00953869	-0.350381	0.125	0.324	0.298459
Gnai1	0.0097927	0.32284	0.812	0.882	0.303165
AC149090.1	0.00981984	0.284372	0.875	0.814	0.303165
Cldn8	0.00982908	1.05388	0.688	0.118	0.303165
Ptp4a2	0.00983719	1.18367	1	0.706	0.303165
Asph	0.00984144	0.894544	0.75	0.48	0.303165
Top2a	0.0101504	1.59566	0.688	0.206	0.311716
Rcn1	0.0103319	1.04145	0.875	0.618	0.316148
Dpp4	0.0103582	0.152844	0.75	0.814	0.316148
Snrpa1	0.0104598	0.975144	0.938	0.608	0.31736
Actr10	0.0104617	0.384101	0.938	0.824	0.31736
1700037H04Rik	0.0105005	0.775751	0.625	0.235	0.317568
Etnk1	0.01078	0.415155	1	0.961	0.32203
Nit1	0.0107964	0.135426	0.688	0.618	0.32203
Sec61b	0.0108089	1.15924	1	0.912	0.32203
C1qtnf12	0.0108573	0.946403	0.812	0.51	0.32203
Ggh	0.0108628	0.150096	0.625	0.598	0.32203
Eif4b	0.0108715	0.513718	0.875	0.951	0.32203
Fibin	0.0108969	-0.24838	0.312	0.431	0.32203
Krt18	0.010907	1.38309	0.875	0.431	0.32203
Capza1	0.0111659	0.968497	0.812	0.441	0.3287
Rsl24d1	0.0112572	0.162903	0.5	0.578	0.329557
Vamp8	0.0113136	0.337549	0.875	0.931	0.329557
Skiv2l2	0.0113156	0.916007	0.875	0.48	0.329557
Rpl5	0.0113275	0.775278	1	1	0.329557
Sod2	0.0116045	0.406576	0.875	0.961	0.336631
Hnrnpa2b1	0.0116801	1.1173	1	0.99	0.3371
Ywhaz	0.0116884	1.12356	0.875	0.902	0.3371
Mrpl58	0.0117241	1.04055	0.812	0.863	0.337153
Zc3h15	0.0120416	1.15228	1	0.961	0.345285
Prelid2	0.0120999	1.08513	0.688	0.431	0.345912
Adgrl2	0.0121347	0.199461	0.625	0.667	0.345912
Gm8186	0.0121678	0.96948	0.75	0.422	0.345912
Alyref	0.0123022	1.07493	0.938	0.667	0.347209
Tinagl1	0.0123063	1.20316	0.688	0.373	0.347209
Svbp	0.0123181	0.448995	0.938	0.833	0.347209
Bin1	0.0125732	0.76074	0.75	0.333	0.35304
Ppia	0.0125964	1.21108	1	1	0.35304
Id4	0.0126865	0.250381	0.875	0.892	0.35304
Gmds	0.0127221	0.22144	0.688	0.676	0.35304
Arl5a	0.0127224	0.8848	0.688	0.363	0.35304
Cdk12	0.012838	0.941613	1	0.745	0.35304
Gstm1	0.0128622	0.714551	0.625	0.324	0.35304
Rnpep	0.0129237	0.847591	0.875	0.412	0.35304
Smap1	0.0129336	1.14843	0.875	0.814	0.35304
Rbm25	0.0129546	1.07527	1	0.971	0.35304
Fam98a	0.0129784	0.920826	0.688	0.206	0.35304
E130311K13Rik	0.0129843	-0.15583	0.188	0.333	0.35304
Cldn7	0.0129872	1.52388	1	0.667	0.35304
Cldn6	0.0130217	1.24803	0.938	0.706	0.35304
Zfc3h1	0.0131117	0.708309	0.812	0.294	0.354514
Anp32b	0.0131847	1.13057	1	1	0.354865
Cdkn1c	0.013196	1.49956	0.812	0.48	0.354865
Celsr2	0.0132543	1.03997	0.625	0.412	0.355473
Ehd1	0.0133863	0.899484	0.625	0.373	0.358047
Luc7l3	0.0134383	1.0666	0.938	0.833	0.358474
Golim4	0.0135445	0.910021	0.75	0.245	0.35919
Sec22a	0.0135662	0.134733	0.625	0.598	0.35919
Ppm1a	0.0135734	0.324776	0.75	0.706	0.35919
Smdt1	0.0139592	1.07789	1	0.98	0.367671
Cirbp	0.0139678	0.930844	0.875	0.52	0.367671
Ppa1	0.0140699	0.938914	0.75	0.461	0.369084
Ifnar1	0.0140957	-0.169163	0.188	0.314	0.369084
Atxn2	0.0142671	0.950482	0.875	0.578	0.37226
Abi2	0.0142918	0.147636	0.438	0.51	0.37226
Eif4enif1	0.0143311	0.849736	0.688	0.265	0.37231
Yaf2	0.0143799	0.852212	0.875	0.471	0.372604
Tapbp	0.0144902	-0.217396	0.375	0.549	0.374488
Umps	0.0147317	0.790676	0.75	0.275	0.379743
Igfbp4	0.0148987	1.70996	0.938	0.549	0.383055
Dnaja1	0.0150043	1.02727	0.938	0.971	0.384743
Hnrnpa3	0.0150417	1.137	1	0.98	0.384743
Lamtor3	0.0151849	0.183227	0.625	0.588	0.387409
Sms	0.0152252	0.974666	0.938	0.51	0.387445
Wfdc2	0.0152699	1.78414	1	0.451	0.387592
Dynll1	0.0153106	1.12754	1	0.99	0.387634
Topbp1	0.0154997	0.969368	0.625	0.235	0.390014
Nap1l1	0.0155242	1.20739	1	0.941	0.390014
2810403A07Rik	0.0155377	0.793777	0.812	0.304	0.390014
Bcas2	0.0156122	0.49491	0.875	0.912	0.390014
Ccnd3	0.0156331	0.838329	0.75	0.52	0.390014
Smad7	0.0156397	0.208261	0.562	0.667	0.390014
Crip2	0.0159141	0.962069	0.812	0.343	0.395864
AC160336.1	0.0159881	1.22605	0.938	0.588	0.395937
Cldn19	0.0159966	1.03989	0.75	0.196	0.395937
Irf2bp2	0.0160986	0.259753	0.562	0.598	0.397333
Ndufv3	0.0161329	0.478182	1	0.931	0.397333
Cdk2ap2	0.0162138	1.09097	0.75	0.51	0.397419
Zfp326	0.0162163	1.08247	0.75	0.51	0.397419
Ran	0.0162983	1.26703	1	0.99	0.397889
Zeb2	0.0163514	1.03208	0.562	0.186	0.397889
Rpl7l1	0.0163733	0.39895	0.875	0.824	0.397889
Rhobtb3	0.0163954	0.873317	1	0.529	0.397889
Adamts1	0.0164701	0.418282	0.875	0.912	0.398728
Rpl36a	0.0165762	1.29993	1	1	0.400324
Tsta3	0.0166355	0.190302	0.438	0.559	0.400588
Adh5	0.0166677	0.458368	0.938	0.931	0.400588
4921524J17Rik	0.0167739	0.152699	0.688	0.588	0.402169
Ndufa7	0.0168874	0.674679	1	0.98	0.403112
Eftud2	0.0169057	0.932709	0.688	0.314	0.403112
Sestd1	0.0169348	0.219495	0.875	0.784	0.403112
Tmed1	0.0171529	0.344729	0.812	0.735	0.406683
Efcab14	0.0173004	0.212641	0.5	0.588	0.406683
Ctsh	0.0173163	0.749021	0.812	0.52	0.406683
Rps23	0.0173526	0.912444	1	1	0.406683
Ddt	0.0173826	0.375271	0.75	0.755	0.406683
Osr2	0.0174603	-0.178267	0.188	0.314	0.406683
1700011H14Rik	0.0174664	0.294239	0.812	0.824	0.406683
Hint1	0.0174727	1.22838	1	1	0.406683
Rpl12	0.0174779	1.16057	1	1	0.406683
Esd	0.0174935	0.563221	1	1	0.406683
Rpl13a	0.0176024	0.656299	1	0.98	0.408259
Wnt7b	0.0176779	0.555281	0.938	0.931	0.408259
Tra2b	0.0176844	1.11709	0.938	0.745	0.408259
H2-Ke6	0.0177274	0.10063	0.5	0.52	0.408305
Ap1g1	0.0178393	0.187376	0.625	0.559	0.409934
Vkorc1	0.0180861	0.195444	0.562	0.578	0.414646
Smagp	0.0181774	0.967077	0.938	0.686	0.415566
Relb	0.0182097	-0.121697	0.188	0.324	0.415566
Prdx4	0.0183	0.984884	0.812	0.549	0.41601
Pou2f1	0.018348	0.83893	0.75	0.235	0.41601
Zdhhc12	0.0183645	0.117783	0.625	0.539	0.41601
Sec62	0.0183964	0.502174	1	1	0.41601
Cks2	0.018659	1.2286	0.688	0.451	0.420458
Ly6a	0.0186776	1.75301	0.812	0.324	0.420458
Aldh2	0.0187418	0.380756	0.938	0.892	0.420578
Zfp462	0.0187675	0.967346	0.688	0.196	0.420578
Lgr4	0.0188766	0.486292	0.875	0.863	0.422072
Fars2	0.0191273	0.150237	0.625	0.539	0.426719
Cetn3	0.0192862	0.500899	0.875	0.892	0.428735
Gfer	0.0193076	0.907922	0.75	0.402	0.428735
Tkt	0.0193469	1.16284	0.875	0.637	0.428735
2022-09-04	0.0194043	0.918919	1	0.843	0.429051
Ophn1	0.0196278	0.694931	0.875	0.284	0.432568
Mia2	0.0196503	0.277689	1	0.804	0.432568
Tmed4	0.0197357	0.174509	0.875	0.716	0.432735
Wwp1	0.0197611	0.157354	0.625	0.578	0.432735
Wdr89	0.0197917	0.127316	0.5	0.5	0.432735
Atp5e	0.0198319	1.18082	1	1	0.432735
Brcc3	0.0199447	0.198929	0.625	0.578	0.434244
Cenpa	0.0200436	1.4654	0.688	0.147	0.435322
Exosc7	0.0200817	0.943916	0.812	0.529	0.435322
Larp1	0.0201548	1.09654	0.688	0.49	0.435888
Efhd1	0.0201954	0.202275	0.625	0.667	0.435888
Tmed7	0.0202572	0.16011	0.688	0.667	0.436276
Lztfl1	0.0203095	0.286431	0.562	0.618	0.436457
Nat8f1	0.020397	-0.204752	0.062	0.275	0.437393
Nme4	0.0204419	0.279149	0.688	0.647	0.437412
Gnaq	0.0206854	0.902382	0.75	0.5	0.441674
Mrps16	0.0207456	0.483481	0.875	0.873	0.442011
Rpl26	0.0208052	0.881028	1	1	0.442333
Wnk1	0.0210053	1.04558	0.812	0.696	0.445635
Rps28	0.0210683	0.960005	1	1	0.445904
Smarca2	0.0211076	0.983346	0.688	0.324	0.445904
Tpm3	0.0212842	0.340153	1	0.931	0.44658
Nucks1	0.0212845	1.30135	0.875	0.863	0.44658
Prrc2a	0.0213151	1.09349	0.812	0.578	0.44658
Zfp560	0.0213974	0.13308	0.375	0.49	0.44658
Scd2	0.0214011	1.19815	0.812	0.696	0.44658
Desi2	0.0214089	0.237959	0.625	0.549	0.44658
Psmd7	0.0214541	1.01746	1	0.882	0.446587
Hmgb1	0.021502	1.1938	1	0.99	0.446648
Parp8	0.021705	0.170626	0.5	0.569	0.449833
Pdia6	0.0217457	0.937329	1	0.971	0.449833
Ube2e2	0.0218274	0.142303	0.5	0.539	0.450587
Dnajc2	0.0219283	0.998729	1	0.745	0.45129
Pttg1	0.0219775	0.350405	0.625	0.696	0.45129
Asap1	0.0220103	1.24282	0.812	0.49	0.45129
Mcm3	0.0220429	1.30121	0.688	0.118	0.45129
Dnajb6	0.0221683	0.361311	0.875	0.843	0.452925
Rpl22	0.0222194	0.948612	1	1	0.45304
Ddb1	0.0223115	0.9992	0.938	0.794	0.453987
Eef2kmt	0.0224075	0.18363	0.375	0.549	0.455009
Arfgef1	0.0225239	0.225325	0.562	0.627	0.456441
Arhgef1	0.0225815	0.123145	0.438	0.461	0.456678
Gm266	0.0228614	1.18065	0.938	0.431	0.459928
Ap2m1	0.02293	1.00327	0.938	0.843	0.459928
Tes	0.0229519	0.868547	0.875	0.549	0.459928
Hist1h1e	0.0229947	1.07123	0.812	0.647	0.459928
Abr	0.0230073	0.83155	0.75	0.245	0.459928
Dusp14	0.0230195	0.235427	0.688	0.735	0.459928
Tpt1	0.023286	0.812479	1	1	0.46432
Cdip1	0.0233925	0.843923	0.75	0.392	0.46551
Leng1	0.0236509	0.775278	0.812	0.225	0.469714
Ranbp3l	0.0237583	1.75789	0.438	0.039	0.470281
2510002D24Rik	0.0237972	0.31615	0.688	0.745	0.470281
Aldoc	0.0238213	-0.10704	0.312	0.314	0.470281
H2-K1	0.0240432	-0.27023	0.562	0.461	0.473723
Usp46	0.0241186	0.779747	0.875	0.324	0.474251
Pitpnc1	0.0241654	0.399398	0.5	0.647	0.474251
Reep3	0.0243368	0.961411	0.938	0.52	0.47501
Tcea1	0.0243414	0.959035	0.938	0.667	0.47501
Mbd2	0.0243472	0.406098	0.938	0.892	0.47501
Emc8	0.0244359	0.988021	0.875	0.549	0.475807
Polr1c	0.0245285	0.252079	0.562	0.627	0.476554
Neu1	0.0245846	0.127877	0.812	0.618	0.476554
Hmgn2	0.0246704	1.31616	0.875	0.824	0.476554
Pgap2	0.0246772	0.18807	0.562	0.569	0.476554
Mmp14	0.0247633	0.883531	0.938	0.373	0.476554
Banf1	0.0248474	1.19628	0.875	0.784	0.476554
Slc25a3	0.0248676	1.07043	1	1	0.476554
Lsm8	0.0248736	1.0204	0.75	0.657	0.476554
Ptprk	0.0249053	0.982486	0.75	0.471	0.476554
Mrps18a	0.0253845	0.41	0.688	0.755	0.48479
Bsg	0.0255038	0.596794	1	1	0.485482
Rps3a1	0.0255183	1.21035	1	1	0.485482
Srsf3	0.0256747	1.21917	1	0.941	0.487206
Smc4	0.0257068	1.4547	0.562	0.422	0.487206
Aamdc	0.0258314	0.262651	0.625	0.608	0.488636
Ctdspl	0.0259309	1.01514	0.875	0.588	0.489207
Pafah1b3	0.0259599	0.578419	0.938	0.98	0.489207
Ift74	0.0261443	0.414921	0.812	0.853	0.491113
Snx24	0.0262489	0.31767	0.562	0.725	0.491113
Ube2c	0.0262785	2.15002	0.438	0.167	0.491113
Sh3bgrl	0.0262893	0.193049	0.75	0.598	0.491113
Gm7932	0.0263467	-0.162519	0.125	0.284	0.491113
[truncated: 9,449 more rows]

## Sheet: N.tubule5_IM2.MutVsCTRL.DEGs
Gene	p_val	avg_logFC	pct.1	pct.2	p_val_adj
[truncated: 9,096 more rows]

[truncated: 3 more sheets: N.tubule6_PST.MutVsCTRL.DEGs, N.tubule7_CNT.MutVsCTRL.DEGs, N.tubule8_DCT.MutVsCTRL.DEGs]
